# Supplementary material for: Assessing target engagement using proteome-wide solvent shift assays
Source: eLife. 2021 Dec 8;10:e70784. doi: 10.7554/eLife.70784 (PMC8654358; doi:10.7554/eLife.70784)
Supplement: Figure 1—source data 1. [file elife-70784-fig1-data1.xlsx]

## Sheet: legend
The table contains two SPP repeat experiments (no treatment).
Each SPP experiment has 16 concentrations.
Each repeat experiment is in one single TMTpro-16plex group.
AEA (%)	0	2.5	3.75	5	6.25	7.5	8.75	10	11.25	12.5	13.75	15	16.25	17.5	18.75	21.25
TMTpro labeling	126	127N	127C	128N	128C	129N	129C	130N	130C	131N	131C	132N	132C	133N	133C	134N
Peptides	The number of quantified peptides
norm_rel_fc	Protein quantifications (scaled to the first concentration, then normalized by TPP package to account for technical errors)
meltPoint	Denaturation concentration determined by TPP pacakge
slope	Curve slope determined by TPP pacakge
plateau	Curve plateau determined by TPP pacakge
R_sq	Curve R2 determined by TPP package
model_converged	Does the fitting of the sigmoidal curve succeed?
Pass_R2(0.8)&Plateau(0.3)	Does the curve have a R2 greater than 0.3, a plateau smaller than 0.3, a valid denaturation concentration, and a valid slope?
For details for column names and TPP package: Franken, H., Mathieson, T., Childs, D. et al. Thermal proteome profiling for unbiased identification of direct and indirect drug targets using multiplexed quantitative mass spectrometry. Nat Protoc 10, 1567–1593 (2015). https://doi.org/10.1038/nprot.2015.101

## Sheet: SPP_16Concentrations_2Reps
Uniprot ID	Gene Symbol	Peptides_Rep1	Peptides_Rep2	norm_rel_fc_126_Rep1	norm_rel_fc_127N_Rep1	norm_rel_fc_127C_Rep1	norm_rel_fc_128N_Rep1	norm_rel_fc_128C_Rep1	norm_rel_fc_129N_Rep1	norm_rel_fc_129C_Rep1	norm_rel_fc_130N_Rep1	norm_rel_fc_130C_Rep1	norm_rel_fc_131N_Rep1	norm_rel_fc_131C_Rep1	norm_rel_fc_132N_Rep1	norm_rel_fc_132C_Rep1	norm_rel_fc_133N_Rep1	norm_rel_fc_133C_Rep1	norm_rel_fc_134N_Rep1	norm_rel_fc_126_Rep2	norm_rel_fc_127N_Rep2	norm_rel_fc_127C_Rep2	norm_rel_fc_128N_Rep2	norm_rel_fc_128C_Rep2	norm_rel_fc_129N_Rep2	norm_rel_fc_129C_Rep2	norm_rel_fc_130N_Rep2	norm_rel_fc_130C_Rep2	norm_rel_fc_131N_Rep2	norm_rel_fc_131C_Rep2	norm_rel_fc_132N_Rep2	norm_rel_fc_132C_Rep2	norm_rel_fc_133N_Rep2	norm_rel_fc_133C_Rep2	norm_rel_fc_134N_Rep2	meltPoint_Rep1	slope_Rep1	plateau_Rep1	R_sq_Rep1	meltPoint_Rep2	slope_Rep2	plateau_Rep2	R_sq_Rep2	model_converged_Rep1	model_converged_Rep2	Pass_R2(0.8)&Plateau(0.3)_Rep1	Pass_R2(0.8)&Plateau(0.3)_Rep2
A0AV02-2	SLC12A8	3	1	1	1.05559	0.971913	0.97345	0.93619	0.860409	0.685659	0.588459	0.40214	0.319687	0.244534	0.188705	0.179602	0.18246	0.174759	0.200173	1	0.887549	1.04825	0.928455	1.04869	1.00851	0.745977	0.660905	0.405559	0.31169	0.206508	0.382554	0.188236	0.192157	0.310831	0.191527	10.3071	-0.141193	0.110634	0.993392	10.6134	-0.183317	0.218326	0.9627	Yes	Yes	Yes	Yes
A0AV96	RBM47	2	3	1	1.01873	0.946652	0.931303	0.897422	0.833145	0.680812	0.437255	0.325418	0.220402	0.187464	0.163246	0.140299	0.13886	0.158964	0.16108	1	1.05078	1.07308	1.13047	0.961405	0.891962	0.736068	0.601735	0.452232	0.310313	0.270299	0.28429	0.189652	0.167244	0.173468	0.0984749	9.61341	-0.172736	0.106793	0.991757	10.7494	-0.130859	0.064787	0.985334	Yes	Yes	Yes	Yes
A0AVF1	TTC26	9	6	1	1.02853	1.02	0.962208	0.934579	0.841247	0.637004	0.418106	0.279748	0.171859	0.122404	0.103739	0.0832353	0.0800088	0.0685797	0.0572638	1	0.996314	0.99421	1.01722	0.905976	0.791656	0.63137	0.463272	0.304972	0.207617	0.158837	0.114961	0.0946387	0.0801718	0.0826499	0.0743701	9.46361	-0.184441	0.0267345	0.99842	9.53246	-0.156444	0	0.99824	Yes	Yes	Yes	Yes
A0AVI4	TMEM129		1																	1	1.23209	1.0699	1.07872	1.24732	1.11314	0.700272	0.402926	0.308643	0.195803	0.228545	0.102857	0	0	0.000248891	8.01109e-05					9.9267	-0.221511	0.0184235	0.947809		Yes		Yes
A0AVT1	UBA6	69	55	1	1.00948	1.00327	1.01898	1.00353	0.931021	0.776997	0.555768	0.388408	0.25619	0.172584	0.125588	0.0877519	0.0739976	0.0579911	0.0491455	1	1.02864	1.00853	1.00657	0.99481	0.918383	0.772141	0.572566	0.395264	0.272815	0.193547	0.132138	0.0919343	0.0624605	0.0532601	0.047464	10.4062	-0.172643	0.0132044	0.999613	10.4789	-0.163664	0	0.999427	Yes	Yes	Yes	Yes
A0FGR8-6	ESYT2	24	20	1	0.964315	0.944822	0.938882	0.877813	0.759154	0.583196	0.384453	0.270593	0.170726	0.119361	0.0988486	0.071229	0.0646133	0.0574512	0.0484855	1	0.987096	0.973833	0.929161	0.87382	0.776895	0.601813	0.414259	0.293126	0.202275	0.152741	0.127767	0.101577	0.0845567	0.0923507	0.0874833	9.09541	-0.168394	0	0.995441	9.27838	-0.153333	0.00207105	0.996149	Yes	Yes	Yes	Yes
A0JLT2	MED19	1	1	1	0.908902	0.934308	0.878953	0.859794	0.686654	0.586882	0.411792	0.30602	0.261231	0.165783	0.148678	0.135502	0.110838	0.132866	0.169738	1	0.937045	0.860611	0.891192	0.808698	0.681133	0.500187	0.370956	0.233759	0.167281	0.128936	0.0783012	0.0778233	0.0786907	0.0757608	0.0801074	9.05251	-0.134869	0.00721856	0.982855	8.5391	-0.159974	0	0.98238	Yes	Yes	Yes	Yes
A0JNW5	UHRF1BP1L	18	16	1	1.00267	1.01618	0.996093	0.957921	0.856845	0.707101	0.566592	0.429633	0.354241	0.289574	0.261056	0.261281	0.230552	0.277785	0.327573	1	1.00693	0.983035	0.999144	0.924942	0.857815	0.680655	0.477624	0.333864	0.229882	0.160683	0.111914	0.0779168	0.063467	0.0662894	0.0517185	10.3467	-0.148479	0.23588	0.993033	9.84201	-0.16356	0	0.99894	Yes	Yes	Yes	Yes
A0MZ66	KIAA1598	55	50	1	0.978863	0.967773	0.98339	0.974682	0.911778	0.838732	0.842819	0.753374	0.724087	0.728148	0.743368	0.810306	0.721259	0.896309	1.10486	1	0.996883	0.997255	1.00441	0.964676	0.943909	0.866764	0.801306	0.711382	0.654538	0.631398	0.599073	0.625271	0.611866	0.747966	0.823087		-0.0903783	0.813366	0.41705		-0.0987259	0.668694	0.874252	Yes	Yes
A0PJW6	TMEM223	4	2	1	1.00244	0.934372	0.955072	0.84962	0.801898	0.670734	0.463211	0.306477	0.241337	0.164417	0.148197	0.138805	0.120875	0.0996745	0.112165	1	1.01168	0.98972	0.919228	0.840922	0.748777	0.572053	0.377005	0.242411	0.154548	0.109129	0.0709688	0.0489694	0.0335194	0.0499164	0.0359943	9.60662	-0.146569	0.0201424	0.991141	8.94807	-0.176125	0	0.993713	Yes	Yes	Yes	Yes
A0PK00	TMEM120B	1	2	1	1.00134	0.934727	0.997125	0.957378	0.762697	0.677805	0.405097	0.243282	0.264536	0.175686	0.146307	0.150939	0.130385	0.143952	0	1	1.04758	1.48474	1.40289	1.15925	1.05528	0.981583	0.753869	0.4299	0.323384	0.245105	0.234083	0.171182	0.117231	0.10932	0.0572772	9.47266	-0.161916	0.0433781	0.987724	11.2031	-0.211741	0.11439	0.8805	Yes	Yes	Yes	Yes
A1A4S6	ARHGAP10	12	11	1	0.948504	0.936454	0.948351	0.901846	0.769129	0.587801	0.326251	0.206327	0.130544	0.0934351	0.0742198	0.052589	0.0401321	0.0397309	0.0300285	1	0.993751	1.00822	0.938991	0.889559	0.767419	0.55842	0.374481	0.23278	0.130692	0.0871585	0.078584	0.0639325	0.0519987	0.0499658	0.0583181	8.98039	-0.194305	0	0.994683	8.99071	-0.182809	0	0.996967	Yes	Yes	Yes	Yes
A1A5C7	SLC22A23	1		1	1.27704	1.11847	1.00188	0.955569	0.921448	0.787747	0.660662	0.510634	0.366361	0.291945	0.299221	0.266961	0.147689	0.172549	0.150695																	11.2893	-0.122751	0.0726004	0.956244					Yes		Yes
A1A5D9	CCDC64B	1		1	0.901386	0.971581	0.99677	0.984354	0.902823	0.81187	0.663884	0.579707	0.498045	0.483876	0.541158	0.435616	0.334514	0.410898	0.49653																	13.0543	-0.108353	0.407607	0.960963					Yes
A1L0T0	ILVBL	29	22	1	1.00051	0.980614	0.99052	0.918812	0.808918	0.666961	0.468267	0.346627	0.260573	0.217524	0.19534	0.17729	0.146073	0.160636	0.158009	1	0.998588	1.00852	0.98185	0.927168	0.790108	0.637603	0.484323	0.32757	0.238279	0.192965	0.15528	0.123208	0.104853	0.0976583	0.0874868	9.73353	-0.152711	0.101993	0.998256	9.68154	-0.145967	0.0104208	0.999252	Yes	Yes	Yes	Yes
A1L170-2	C1orf226	4	4	1	1.03565	1.08493	0.959953	0.946993	0.977761	0.813738	0.806669	0.738535	0.684924	0.636783	0.716574	0.69009	0.649262	0.788495	0.929841	1	1.04326	1.08066	1.1182	0.919961	0.89743	0.830101	0.747837	0.645186	0.536282	0.513281	0.488465	0.458657	0.348723	0.409314	0.372259		-0.113103	0.731684	0.762369	14.0454	-0.0780261	0.250879	0.970347	Yes	Yes		Yes
A1L390	PLEKHG3	2	3	1	1.16585	1.16511	1.0905	1.05752	0.972674	0.805323	0.630655	0.450584	0.357857	0.219089	0.211184	0.155667	0.118779	0.130436	0.0985438	1	0.97265	0.944913	0.92421	0.911049	0.822562	0.667759	0.448094	0.35543	0.255937	0.152322	0.10837	0.0893769	0.05742	0.0494844	0.0727811	10.9253	-0.156835	0.0702711	0.973834	9.72578	-0.157031	0	0.993266	Yes	Yes	Yes	Yes
A1L3X0	ELOVL7		1																	1	0.944706	1.04487	1.14543	0.9686	1.011	0.732508	0.469627	0.305682	0.254384	0.167879	0.124074	0.128875	0.0535663	0.073186	0					10.0476	-0.195156	0.0426234	0.984124		Yes		Yes
A1X283	SH3PXD2B	35	34	1	1.00828	0.991156	1.01602	1.01075	0.953508	0.854542	0.807987	0.667113	0.545406	0.399198	0.257332	0.157138	0.125214	0.120794	0.103596	1	0.972045	0.938578	0.966115	0.944782	0.902288	0.847061	0.751788	0.623693	0.524451	0.395392	0.270204	0.15568	0.100699	0.0865331	0.081136	12.5034	-0.130616	0	0.993621	12.1875	-0.127781	0	0.985678	Yes	Yes	Yes	Yes
A1XBS5	FAM92A1	11	6	1	0.993455	0.970564	0.981836	0.964055	0.863966	0.700959	0.50973	0.369415	0.245133	0.170474	0.132263	0.113823	0.105085	0.101697	0.102172	1	0.956981	0.971048	0.962201	0.923796	0.839674	0.722245	0.503724	0.352138	0.231064	0.155199	0.0898622	0.0606865	0.0477395	0.0427637	0.0422358	10.0159	-0.163051	0.0435059	0.998597	9.9681	-0.169129	0	0.995482	Yes	Yes	Yes	Yes
A2A3K4-2	PTPDC1	1		1	1.34456	1.15221	1.24519	1.13646	0.979857	0.685532	0.384837	0.284894	0.227286	0.158683	0	0.0992638	0.075631	0	0																	9.73005	-0.217717	0.0261896	0.935631					Yes		Yes
A2RRP1	NBAS	29	34	1	0.979319	0.957453	0.933803	0.870271	0.736129	0.538581	0.300865	0.181144	0.111446	0.0802507	0.0654169	0.0536538	0.0458417	0.0524096	0.0482598	1	1.0098	0.943208	0.922189	0.868641	0.729848	0.53079	0.332996	0.219349	0.133006	0.10038	0.0828705	0.0743065	0.0612709	0.0676084	0.0570766	8.71189	-0.194589	0	0.995236	8.75682	-0.177629	0	0.995246	Yes	Yes	Yes	Yes
A2RTX5	TARSL2	21	23	1	1.02378	0.967551	0.992734	1.01145	0.916069	0.784338	0.673088	0.526675	0.429587	0.362188	0.287333	0.262297	0.217546	0.199737	0.188446	1	1.02113	0.985277	1.01657	0.957689	0.879771	0.729055	0.623515	0.477707	0.365094	0.312525	0.241348	0.201787	0.179254	0.147752	0.128873	11.5866	-0.114352	0.0965184	0.997828	10.9955	-0.11645	0.0102094	0.998787	Yes	Yes	Yes	Yes
A2RU67	KIAA1467	3	2	1	1.05994	1.07754	1.10321	1.08823	1.00513	0.903275	0.819008	0.663133	0.528907	0.483915	0.487481	0.44266	0.367547	0.405572	0.473055	1	1.07673	1.05293	1.1161	0.951719	0.900302	0.751086	0.668512	0.634364	0.423206	0.286676	0.344692	0.389999	0.309369	0.285581	0.241172	13.386	-0.127832	0.411172	0.968878	11.8129	-0.106225	0.188897	0.967956	Yes	Yes		Yes
A2RUB1	C17orf104	1	1	1	0.969779	1.03874	0.96702	0.842393	0.700898	0.588	0.430686	0.318038	0.206759	0.126662	0.117276	0.106795	0.0868438	0.0984887	0.0576799	1	0.900702	0.999514	0.917642	0.848198	0.731715	0.582651	0.419796	0.392785	0.260417	0.195705	0.120508	0.116789	0.125673	0.136317	0.127076	9.09818	-0.149418	0	0.99431	9.29715	-0.132901	0	0.987289	Yes	Yes	Yes	Yes
A2RUC4	TYW5	4	4	1	0.995951	1.05333	0.970127	1.0076	0.986945	0.791444	0.575715	0.407977	0.254503	0.22072	0.161062	0.125186	0.0961464	0.111438	0.0688127	1	0.979606	1.04199	1.03212	1.00629	0.995193	0.78747	0.65056	0.437379	0.337996	0.354628	0.362685	0.369103	0.364513	0.564032	0.673566	10.5342	-0.177904	0.065467	0.996833	10.7434	-0.224524	0.430944	0.904907	Yes	Yes	Yes
A2VDF0	FUOM		2																	1	0.818573	1.25675	1.21067	1.09628	0.832062	0.728682	0.691763	0.492854	0.354355	0.39039	0.306974	0.216479	0.250069	0.279697	0.240498					11.16	-0.124626	0.186745	0.910594		Yes		Yes
A2VDJ0-5	KIAA0922	4	6	1	1.02825	1.01845	0.994325	0.933066	0.870362	0.720507	0.481597	0.367035	0.265939	0.179659	0.142348	0.141576	0.110483	0.104372	0.0799616	1	1.00461	1.02098	1.03698	0.951076	0.882257	0.696247	0.508988	0.368944	0.246596	0.172098	0.134431	0.11399	0.0956938	0.0933162	0.0772524	10.0325	-0.158482	0.0416265	0.998078	10.0439	-0.161687	0.0298991	0.998662	Yes	Yes	Yes	Yes
A3KMH1	VWA8	31	34	1	0.963061	0.948577	0.928673	0.867092	0.748378	0.579824	0.369049	0.246105	0.171855	0.128685	0.101142	0.0912543	0.0827352	0.0768156	0.0807249	1	0.965701	0.947395	0.908271	0.856488	0.714073	0.511195	0.324731	0.216011	0.135891	0.0934438	0.0727438	0.059396	0.0499363	0.0571095	0.0587725	8.99841	-0.165772	0.0076782	0.994237	8.64535	-0.179699	0	0.994221	Yes	Yes	Yes	Yes
A3KN83	SBNO1	27	31	1	1.00017	0.993566	1.0168	1.00194	0.914236	0.811258	0.592048	0.374642	0.210169	0.148828	0.118162	0.0871196	0.0779608	0.0695753	0.0677207	1	1.00954	0.996927	0.969604	0.989768	0.935013	0.809509	0.613062	0.396326	0.237914	0.1664	0.115445	0.0942328	0.0854311	0.0800035	0.0657818	10.4127	-0.195718	0.0408185	0.998918	10.5396	-0.187314	0.0396896	0.999131	Yes	Yes	Yes	Yes
A4D126	ISPD	1	1	1	1.45	1.06044	1.27139	1.32262	1.52163	1.07953	1.18222	1.13162	0.954457	0.709624	1.09351	0.796698	0.704688	0.376386	0	1	0.821309	0.602489	0.739299	0.823388	0.984752	0.869087	0.775573	0.438417	0.411903	0.71647	0.509476	0.338888	0.372069	0.29347	0.176592	18.1653	-0.251743	0	0.643455	13.339	-0.0747282	0	0.588608	Yes	Yes
A4D161-2	FAM221A		2																	1	1.08565	1.17165	1.1705	1.02696	0.973469	0.849671	0.733803	0.583072	0.494912	0.433099	0.371247	0.29362	0.353892	0.39613	0.273258					12.2876	-0.120505	0.286228	0.953403		Yes		Yes
A4D1E9	GTPBP10	25	20	1	0.969091	0.942675	0.920923	0.890048	0.756423	0.571413	0.328583	0.213222	0.143627	0.0989459	0.0771888	0.0558983	0.049568	0.0482761	0.0367088	1	1.00023	0.94733	0.943034	0.887429	0.774274	0.566493	0.35869	0.249601	0.168976	0.104602	0.0895541	0.0681073	0.0551756	0.0511168	0.0594292	8.91869	-0.18625	0	0.994595	9.03564	-0.175866	0	0.996617	Yes	Yes	Yes	Yes
A4D1P6	WDR91	9	6	1	1.03859	1.0433	1.02826	1.00312	0.935922	0.793491	0.617632	0.434372	0.312107	0.245641	0.186113	0.143595	0.136172	0.13807	0.142081	1	1.05658	1.03042	1.01456	1.04493	0.912293	0.831888	0.59517	0.471726	0.342622	0.271688	0.243024	0.18946	0.178373	0.191942	0.166456	10.7256	-0.161539	0.0933978	0.997497	10.8691	-0.154362	0.140612	0.995064	Yes	Yes	Yes	Yes
A4D1U4	LCHN	6	4	1	0.957796	0.967985	0.997845	0.928424	0.840537	0.649328	0.451411	0.320918	0.239691	0.184979	0.144154	0.122856	0.118335	0.105065	0.0936017	1	1.00363	1.0222	0.964666	0.91093	0.820176	0.653624	0.469689	0.358979	0.216273	0.174274	0.153775	0.12666	0.107549	0.107981	0.11582	9.66929	-0.162674	0.052852	0.998227	9.70832	-0.153851	0.0391312	0.997203	Yes	Yes	Yes	Yes
A4D2B0	MBLAC1	1		1	0.965561	0.991761	0.946516	0.940129	0.785813	0.728191	0.582575	0.459075	0.372212	0.283089	0.219235	0.167675	0.163217	0.152381	0.215335																	10.6119	-0.115569	0.0256731	0.990112					Yes		Yes
A4D997	ERCC6L2	1	1	1	1.17308	1.00289	1.11656	1.05593	0.752382	0.574313	0.395264	0.303399	0.288104	0.215217	0.176125	0.152401	0.217875	0.155027	0.191094	1	1.21569	1.07824	1.16861	0.963041	0.816754	0.815302	0.576987	0.498471	0.337727	0.373345	0.255815	0.316064	0.169362	0.208754	0.238771	9.18085	-0.192618	0.167305	0.973463	10.9788	-0.123626	0.149737	0.948745	Yes	Yes	Yes	Yes
A5A3E0	POTEF	1		1	1.03004	1.03078	1.06827	0.996035	1.00176	0.965515	0.80279	0.639989	0.524933	0.480673	0.490751	0.394433	0.285249	0.270758	0.186321																	13.5314	-0.0933177	0.0860469	0.98188					Yes		Yes
A5D8V6	VPS37C	3	3	1	1.08144	1.07293	1.03356	1.04813	1.01306	0.857637	0.749255	0.60681	0.54932	0.492213	0.477088	0.438311	0.380562	0.441267	0.5289	1	1.00061	0.889364	1.02152	0.85909	0.821122	0.826834	0.70668	0.557379	0.530578	0.509032	0.512405	0.423043	0.444859	0.450565	0.417732	13.4069	-0.127125	0.440691	0.971557	14.4396	-0.0715129	0.268868	0.960069	Yes	Yes		Yes
A5PLL7	TMEM189		3																	1	0.938874	0.94423	0.989185	0.86283	0.912137	0.756988	0.604243	0.542423	0.453782	0.396247	0.372327	0.360462	0.366509	0.382149	0.314945					11.7212	-0.105085	0.280278	0.97999		Yes		Yes
A5PLN9-5	TRAPPC13	4	4	1	0.930361	0.990198	0.973661	0.936507	0.896086	0.681197	0.455214	0.34047	0.220598	0.152097	0.094252	0.0797449	0.0714446	0.0807607	0.0511192	1	1.05231	0.978615	0.976912	0.920301	0.811706	0.663071	0.494237	0.344123	0.249876	0.185317	0.133929	0.0980593	0.0812729	0.0755549	0.0675006	9.83518	-0.173663	0.015756	0.99618	9.81071	-0.149981	0	0.997525	Yes	Yes	Yes	Yes
A5YKK6	CNOT1	90	81	1	1.00299	0.973946	0.970876	0.939236	0.805744	0.634784	0.414103	0.274444	0.167162	0.107586	0.0734857	0.0531298	0.0426455	0.0388709	0.0352518	1	1.00167	0.966284	0.948452	0.923255	0.811921	0.627301	0.429591	0.28882	0.183526	0.119246	0.0807381	0.0528188	0.0383572	0.0388337	0.0393236	9.39961	-0.183758	0	0.998581	9.43764	-0.177684	0	0.997434	Yes	Yes	Yes	Yes
A5YM69	ARHGEF35	2		1	1.0988	1.31808	1.03964	0.896914	0.927001	0.868635	0.809724	0.667185	0.609159	0.529822	0.633793	0.600446	0.554357	0.580833	0.761924																		-0.103509	0.601504	0.789831					Yes
A6NC05	C5orf63		1																	1	1.17667	1.2986	1.1439	1.2072	1.07596	0.91469	0.712362	0.709306	0.551708	0.541143	0.458743	0.404587	0.414747	0.569911	0.443277					14.1455	-0.121804	0.449303	0.8558		Yes
A6NC57	ANKRD62		1																	1	0.926904	0.722143	0.993396	0.864941	0.720475	0.844128	0.879021	0.745462	0.522676	0.626913	0.675569	0.576724	0.495141	0.550781	0.476427						-0.0459048	0	0.687176		Yes
A6NC98	CCDC88B	2		1	1.11075	0.992786	1.05444	0.971043	0.863009	0.662854	0.530695	0.366039	0.248114	0.192061	0.170329	0.0705035	0.123089	0.114534	0.0607849																	10.0342	-0.153185	0.0204377	0.991323					Yes		Yes
A6NCE7	MAP1LC3B2	1	3	1	1.02869	0.890679	0.97466	0.974135	0.902673	0.868649	0.810768	0.640156	0.641955	0.571934	0.482773	0.446451	0.355262	0.36404	0.350277	1	1.01178	1.04566	1.03098	1.10777	1.02066	0.900637	0.751628	0.64397	0.563322	0.530535	0.450219	0.406379	0.390735	0.388435	0.293226	14.7564	-0.0682686	0.0573086	0.976531	13.6064	-0.0971349	0.292222	0.980088	Yes	Yes	Yes	Yes
A6NCM1	IQCA1P1		2																	1	1.08638	1.02782	0.978063	0.88118	0.797418	0.643979	0.557012	0.35928	0.304813	0.214314	0.160295	0.13998	0.100962	0.0661319	0.0648703					9.94734	-0.136499	0	0.99161		Yes		Yes
A6ND36	FAM83G	13	10	1	1.0264	0.996146	1.01658	0.986045	0.889375	0.796036	0.623458	0.44531	0.346406	0.252556	0.178948	0.133925	0.108983	0.0933251	0.0851986	1	1.05064	0.939054	0.965137	0.870181	0.802342	0.738568	0.58456	0.43722	0.305728	0.221801	0.158279	0.109352	0.0775423	0.0689105	0.0709349	10.8798	-0.139237	0	0.998728	10.363	-0.139111	0	0.987403	Yes	Yes	Yes	Yes
A6NDB9	PALM3	2	2	1	1.01838	1.00759	1.01574	0.965599	0.900328	0.802508	0.802506	0.666214	0.557959	0.505228	0.427267	0.378929	0.338428	0.292301	0.251893	1	1.05062	0.989824	1.03505	1.04572	0.940608	0.805127	0.808664	0.574486	0.537424	0.37908	0.430094	0.344452	0.202602	0.27581	0.420679	13.6478	-0.0774114	0	0.994889	12.4335	-0.115987	0.264126	0.961153	Yes	Yes	Yes	Yes
A6NDE4	RBMY1B	2		1	0.974149	0.89031	0.923236	0.849684	0.710002	0.551515	0.367543	0.247352	0.202112	0.116673	0.101505	0.139098	0.059961	0.0583775	0.0727259																	8.84213	-0.158522	0	0.989527					Yes		Yes
A6NDG6	PGP	27	18	1	1.02222	0.977149	0.949383	0.980415	0.97194	0.862502	0.853555	0.738597	0.726872	0.698376	0.731553	0.697561	0.619586	0.825684	1.07278	1	1.01204	0.968174	0.988957	0.967068	0.996235	0.877121	0.829496	0.762138	0.726111	0.681699	0.629861	0.738813	0.713039	0.888027	0.961461		-0.091286	0.766852	0.533366		-0.104943	0.764077	0.663885	Yes	Yes
A6NDU8	C5orf51	4	3	1	1.03022	1.04805	1.02597	1.00617	0.935513	0.818619	0.633731	0.504907	0.363019	0.256763	0.200412	0.189976	0.148085	0.115257	0.0989095	1	1.12815	1.0435	1.10683	1.03808	0.973343	0.883151	0.699802	0.556236	0.383558	0.296306	0.229974	0.198559	0.156519	0.136542	0.170949	11.1337	-0.139784	0.0427639	0.997469	11.5049	-0.152478	0.110529	0.985408	Yes	Yes	Yes	Yes
A6NED2	RCCD1	3	4	1	1.04817	0.969112	1.04653	1.18355	0.923496	0.791949	0.6491	0.506552	0.391254	0.32874	0.263258	0.213764	0.189377	0.160299	0.163026	1	1.04494	0.955792	0.973697	0.95989	0.850414	0.723965	0.546144	0.427744	0.343236	0.26031	0.190826	0.139036	0.0834723	0.044527	0.0466533	11.2792	-0.133982	0.10934	0.978312	10.4625	-0.1376	0	0.994335	Yes	Yes	Yes	Yes
A6NFD8	HELT	2		1	0.998365	1.03443	1.0107	0.929472	0.906923	0.809067	0.689653	0.631668	0.593128	0.616009	0.610771	0.653682	0.555636	0.696505	0.983121																		-0.129901	0.666815	0.721879					Yes
A6NFI3	ZNF316	4	2	1	1.00206	1.02556	0.970493	0.916173	0.777426	0.604032	0.465732	0.321678	0.236227	0.204661	0.15774	0.143189	0.10119	0.141046	0.141629	1	1.00393	0.987097	0.98628	0.970242	0.813592	0.592905	0.384904	0.257573	0.196227	0.131187	0.100729	0.0653062	0.026312	0.0351104	2.36946e-05	9.47952	-0.151164	0.060119	0.997563	9.31013	-0.182432	0	0.998767	Yes	Yes	Yes	Yes
A6NGB9	WIPF3	8	8	1	1.00427	1.04387	1.05044	1.03677	0.997512	0.913286	0.798056	0.720617	0.689975	0.685251	0.669185	0.655368	0.604387	0.733477	0.863053	1	1.04822	1.04039	1.11414	1.06786	0.920553	0.86427	0.786943	0.673499	0.605647	0.566635	0.523969	0.50157	0.51172	0.591249	0.623353		-0.12102	0.699175	0.883447		-0.101905	0.538018	0.947856	Yes	Yes
A6NGR9	MROH6	1	1	1	0.966906	0.919329	0.839409	0.790458	0.689294	0.504632	0.309214	0.237935	0.158961	0.123425	0.0826446	0	0	0.0994241	6.75222e-05	1	1.16712	1.1666	1.25758	0.900966	0.710071	0.656852	0.68072	0.473434	0.469961	0.398282	0.328974	0.180156	0.176831	0.172382	0.137609	8.43358	-0.172562	0	0.978553	11.0678	-0.101025	0	0.921171	Yes	Yes	Yes	Yes
A6NHL2	TUBAL3	1	1	1	1.02886	0.815914	0.942685	0.886402	0.811844	0.798503	0.564661	0.332654	0.192411	0.109814	0.0784396	0.0375755	0.0289739	0.0245661	0	1	1.20563	1.16019	0.912989	1.24569	1.01219	1.09917	0.67463	0.59222	0.389129	0.204799	0.183807	0.113332	0.068285	0.0495985	0.063053	10.1534	-0.192459	0	0.973448	11.626	-0.188836	0.0353252	0.944731	Yes	Yes	Yes	Yes
A6NHR9	SMCHD1	55	51	1	0.956123	0.909052	0.883528	0.78659	0.647719	0.452262	0.238844	0.147326	0.0985819	0.0740583	0.0644075	0.0581181	0.0503921	0.0535814	0.047529	1	0.971257	0.934948	0.898228	0.810842	0.622013	0.430501	0.244263	0.150796	0.0898016	0.0714472	0.0544602	0.0494111	0.0401706	0.0399987	0.0395799	8.08763	-0.190157	0	0.988162	8.05506	-0.196662	0	0.993931	Yes	Yes	Yes	Yes
A6NI28	ARHGAP42	5	5	1	0.958302	0.91695	0.955636	0.926532	0.837826	0.715046	0.564351	0.463963	0.300888	0.218395	0.179615	0.144173	0.158439	0.132601	0.177834	1	0.912137	1.00158	0.895262	0.889452	0.83535	0.745689	0.628137	0.507874	0.328544	0.237596	0.155211	0.0982109	0.0701906	0.0845554	0.0917453	10.3915	-0.134088	0.0490692	0.988072	10.7127	-0.138105	0	0.979271	Yes	Yes	Yes	Yes
A6NIH7	UNC119B	12	10	1	1.03647	1.00019	1.00703	1.03031	0.960361	0.853462	0.848642	0.74734	0.728846	0.710032	0.705844	0.760493	0.637239	0.782352	0.759262	1	1.05849	1.06383	1.03649	1.00927	1.09559	0.902696	0.74995	0.652722	0.650228	0.580132	0.554307	0.611987	0.617126	0.682685	0.58914		-0.0741031	0.721004	0.927179		-0.155122	0.610185	0.953137	Yes	Yes
A6NIL9	CRYM-AS1	1		1	1.31228	0.845615	1.2284	1.52246	1.19128	1.66791	1.07209	1.14475	0.803232	1.32858	1.1397	0.689666	0.336027	0.232488	0.218211																	16.6688	-0.518452	0.243673	0.604766					Yes
A6NJ78	METTL15	11	14	1	0.971442	0.924204	0.942898	0.818144	0.700616	0.50482	0.298706	0.184071	0.103115	0.0685006	0.0505802	0.0353532	0.0326975	0.0301612	0.0242797	1	1.00182	0.955923	0.962091	0.865977	0.724025	0.508891	0.322237	0.207001	0.121834	0.0863216	0.0649672	0.0450455	0.0437912	0.0410123	0.0382378	8.49404	-0.194536	0	0.992278	8.6773	-0.18956	0	0.997617	Yes	Yes	Yes	Yes
A6NKB5	PCNXL2	1	1	1	1.25538	0.898053	1.02338	0.919702	0.866955	0.976923	1.06519	0.794998	0.810754	0.799171	0.923969	1.25269	1.02248	0.617966	0.189283	1	1.39448	1.16671	1.08289	1.3721	1.24358	1.15435	1.08929	0.964931	0.870547	0.936846	1.01836	0.840571	0.629542	0.550021	0.121647	18.7944	0	0.189283	0.687862	18.5858	-0.173301	0	0.707384	Yes	Yes
A6NKD9	CCDC85C	5	6	1	1.0037	1.0173	1.00462	0.980479	0.910967	0.804692	0.659558	0.51093	0.405445	0.31676	0.256699	0.203818	0.176964	0.202114	0.143047	1	1.12925	1.05176	1.00832	1.01616	0.916071	0.833817	0.675526	0.497474	0.399238	0.298486	0.285106	0.225684	0.150521	0.136329	0.108651	11.3557	-0.123573	0.0710219	0.998909	11.4496	-0.124696	0.0320622	0.988935	Yes	Yes	Yes	Yes
A6NKF1	SAC3D1	2	2	1	1.06955	1.04608	1.11507	1.03048	0.859892	0.753633	0.657382	0.453671	0.429236	0.319039	0.282916	0.248117	0.279597	0.204939	0.21041	1	1.02561	0.945021	0.937698	0.867888	0.764115	0.619078	0.456556	0.356757	0.232039	0.180005	0.140633	0.113047	0.0562005	0.0608445	0.0625554	11.1267	-0.123189	0.154986	0.982859	9.47786	-0.146666	0	0.993602	Yes	Yes	Yes	Yes
A6NKZ8			2																	1	0.81188	0.757703	0.748306	0.674234	0.506374	0.348207	0.217344	0.11683	0.0866283	0.037962	0.0490489	0.025884	0.0241787	2.07913e-05	1.60463e-05					7.03019	-0.192989	0	0.933244		Yes		Yes
A6NM11	LRRC37A2		6																	1	1.04688	0.905493	0.894666	0.888756	0.712052	0.606423	0.4704	0.288794	0.1609	0.11673	0.0613259	0.0265011	0.0159862	0.00660742	6.98523e-06					9.20299	-0.174499	0	0.981071		Yes		Yes
A6NNH0	GATSL1	1		1	1.0541	1.01502	1.02309	0.975041	0.943464	0.776225	0.684183	0.466644	0.369756	0.279907	0.192051	0.151575	0.127435	0.0900794	0.0728563																	11.146	-0.136151	0	0.996707					Yes		Yes
A6NNL5	C15orf61	1		1	1.02757	0.957014	1.00141	0.857904	0.738112	0.524478	0.338602	0.209863	0.141116	0.112706	0.0711335	0.0722218	0.0798274	0.0827475	0.0857849																	8.75289	-0.186309	0.0271061	0.996048					Yes		Yes
A6NP81		1		1	1.47672	1.00122	0.889622	0.904453	0.755134	0.67036	0.575126	0.525821	0.424692	0.339855	0.315186	0.135728	0.0959955	0.04652	0.0210638																	10.6076	-0.116165	0	0.884596					Yes		Yes
A6QL63	BTBD11	1	2	1	1.15044	1.02163	0.956055	1.0687	0.94488	0.733319	0.558865	0.30562	0.253785	0.105933	0	0	0.000314849	0.000194479	0	1	0.904539	0.931155	0.979686	0.989005	0.834574	0.674097	0.6246	0.497056	0.295513	0.231222	0.187313	0.167202	0.108671	0.141228	0.0952848	10.152	-0.211316	0	0.985087	10.5919	-0.12839	0	0.984869	Yes	Yes	Yes	Yes
A7E2V4-2	ZSWIM8		2																	1	1.3323	0.920338	1.00256	1.5189	0.752328	0.702155	0.39095	0.355658	0.291163	0.207387	0.264649	0.182446	0.169857	0.203436	0.130013					9.61186	-0.208329	0.182968	0.856615		Yes		Yes
A7E2V4-4	ZSWIM8	3		1	0.998516	0.944505	0.872509	0.958767	0.783716	0.577528	0.375271	0.217921	0.141126	0.133788	0.1054	0.0990483	0.0879848	0.0824941	0.0909342																	9.07085	-0.199255	0.0566981	0.99098					Yes		Yes
A7KAX9	ARHGAP32	9	12	1	1.19992	1.0438	1.03181	1.02235	0.898181	0.813889	0.653053	0.514936	0.41872	0.269673	0.204025	0.13619	0.133686	0.106883	0.110214	1	0.988655	1.01766	0.997554	0.980548	0.896503	0.789522	0.618723	0.464557	0.371079	0.271031	0.191478	0.16584	0.116867	0.120073	0.122301	11.2865	-0.131111	0	0.979549	10.9568	-0.133814	0.0228951	0.998579	Yes	Yes	Yes	Yes
A7MBM2	DISP2	2	1	1	0.915658	1.0082	0.813235	0.840361	0.72347	0.712017	0.565559	0.528153	0.541764	0.54501	0.584996	0.609416	0.578044	0.760966	0.87299	1	1.20599	1.08462	1.10246	1.14113	0.989708	0.98333	0.663722	0.502482	0.344257	0.281307	0.211834	0.196851	0.112139	0.138101	0.0824937		-0.110522	0.621783	0.66317	11.31	-0.176114	0.102378	0.965801	Yes	Yes		Yes
A8CG34	POM121C	13	2	1	1.0186	0.971996	0.978208	0.928628	0.756895	0.624551	0.462244	0.363678	0.297928	0.262146	0.223694	0.226254	0.205901	0.211675	0.256139	1	1.0274	0.945953	0.968448	0.863466	0.689124	0.538657	0.406428	0.341933	0.272257	0.168226	0.125372	0.111301	0.139561	0.144218	0.0724632	9.55293	-0.149223	0.176962	0.996329	9.06548	-0.138165	0	0.994879	Yes	Yes	Yes	Yes
A8K2U0	A2ML1	3		1	1.08035	0.905279	1.10102	0.979362	0.990775	0.923941	0.83654	0.85996	0.636621	0.633922	0.901459	0.878751	0.961794	1.06016	1.31372																									No
A8K855	EFCAB7	3	2	1	1.29376	1.48526	1.36301	1.3292	1.00655	0.899309	0.7431	0.481067	0.386581	0.628485	0.409073	0.191401	0.238309	0.337546	0.223725	1	0.847289	1.02993	1.02155	0.977219	0.796747	0.559135	0.524453	0.352443	0.258832	0.221213	0.118223	0.0763759	0.0954321	0.052972	0.0248161	12.03	-0.131493	0.245919	0.781393	9.69451	-0.14986	0	0.981722	Yes	Yes		Yes
A8MPS7	YDJC	7	4	1	1.04141	1.10796	0.99403	0.993442	0.914526	0.862394	0.714825	0.585604	0.523025	0.521273	0.465463	0.434156	0.390347	0.475665	0.47432	1	1.0186	1.01899	1.06128	1.00085	0.942706	0.840311	0.712857	0.568104	0.519808	0.476331	0.422043	0.453626	0.428081	0.491988	0.474179	13.445	-0.11354	0.426309	0.977687	12.9448	-0.131015	0.441594	0.989191	Yes	Yes
A8MT69	STRA13	4	2	1	1.15886	1.21773	1.13356	1.34297	1.21715	1.0988	1.0398	0.765268	0.807715	0.750927	0.650857	0.718992	0.614955	0.723356	0.828559	1	1.26304	1.18632	1.09152	1.22474	1.16432	0.973422	0.848642	0.617026	0.674906	0.504602	0.458957	0.455996	0.468462	0.552095	0.504352		-0.787224	0.727909	0.63192	15.8739	-0.147365	0.49013	0.853404	Yes	Yes
A8MVW0	FAM171A2	2		1	1.13318	0.974947	1.0376	1.00134	0.931165	0.833279	0.6776	0.631455	0.534339	0.483474	0.450084	0.507172	0.3648	0.405152	0.374745																	13.4323	-0.0939057	0.344755	0.972703					Yes
A8MW92	PHF20L1		1																	1	1.20456	1.035	0.894603	0.958416	0.713248	0.578129	0.51071	0.37298	0.241798	0.177763	0.167994	0.154576	0.0733962	0.135699	0.257319					9.44196	-0.144052	0.0739911	0.959828		Yes		Yes
A8MWD9		12	7	1	1.0275	1.00665	0.977868	0.995026	0.907215	0.829135	0.743726	0.654532	0.612403	0.609072	0.623631	0.680194	0.572921	0.677072	0.766027	1	0.940635	1.05258	0.973889	0.999559	0.956328	0.81463	0.694334	0.628086	0.577797	0.519318	0.530384	0.547697	0.519841	0.647367	0.60579		-0.108548	0.645298	0.928241		-0.132981	0.560141	0.963036	Yes	Yes
A8MXV4	NUDT19	15	15	1	1.0011	1.05113	1.06081	0.995049	0.965513	0.846345	0.759347	0.631351	0.496034	0.344721	0.210684	0.109526	0.0983779	0.105087	0.0905479	1	0.965633	0.991454	0.996152	0.94603	0.902319	0.797795	0.718967	0.587709	0.456552	0.340638	0.224834	0.10991	0.0790118	0.0776299	0.0750715	12.0568	-0.139559	0	0.991301	11.672	-0.134156	0	0.988807	Yes	Yes	Yes	Yes
A8MYB1	TMCO5B	2		1	0.963959	1.00902	0.89355	0.841106	0.793628	0.727106	0.545537	0.349506	0.222134	0.153498	0.0842321	0.0562356	0.0647212	0.0483394	0.0535008																	9.92171	-0.161388	0	0.981761					Yes		Yes
A9UHW6-3	MIF4GD	7	6	1	1.02928	1.0639	1.09623	1.0967	1.04794	0.953649	0.81355	0.689414	0.549455	0.430215	0.338421	0.237227	0.186576	0.13042	0.103771	1	1.10927	1.08964	1.22101	1.04479	1.0445	0.871765	0.738714	0.694715	0.542821	0.423985	0.323859	0.248785	0.176924	0.132488	0.122479	12.9545	-0.121981	0	0.986325	12.734	-0.114967	0	0.9631	Yes	Yes	Yes	Yes
B1AK53	ESPN	11	4	1	1.01473	1.02524	1.00957	0.961061	0.895664	0.761964	0.626893	0.491687	0.440682	0.391154	0.390026	0.382875	0.348467	0.41518	0.499716	1	0.988832	1.18145	1.00572	0.968126	0.835687	0.810694	0.642092	0.516969	0.404249	0.36577	0.340498	0.348142	0.293384	0.348384	0.399183	11.2123	-0.146832	0.389536	0.982701	11.3049	-0.128576	0.304376	0.963913	Yes	Yes
B2RTY4-4	MYO9A	4	2	1	1.00073	0.962236	0.912259	0.862676	0.74002	0.578729	0.340089	0.236277	0.145894	0.129155	0.102491	0.0822556	0.0627552	0.0533055	0.0518141	1	1.00901	0.936535	0.959053	0.938547	0.795988	0.719983	0.680579	0.487106	0.389318	0.31311	0.241169	0.157106	0.107944	0.0777675	0.0220724	8.90907	-0.17104	0	0.994342	10.944	-0.124393	0	0.982257	Yes	Yes	Yes	Yes
B5MCY1	TDRD15	3		1	0.866728	1.09403	0.903793	0.783075	0.866557	0.620691	0.66408	0.600521	0.655108	0.463194	0.478223	0.763144	0.79152	0.769913	0.482086																		-0.0950149	0.612702	0.625139					Yes
B9A064	IGLL5	2	1	1	0.954072	0.915329	1.16946	1.20499	1.3379	1.22906	1.07709	0.879631	0.905627	0.822216	1.08185	0.902842	1.13796	6.00861	1.65322	1	0.804322	1.23224	1.75218	1.90951	1.07251	0.898295	0.83455	0.836462	0.645665	0.609709	0.558779	0.837584	0.41224	0.72652	0.547842		0	1.5	0.116117		-0.0905202	0.597316	0.371015	Yes	Yes
C9JI98	TMEM238		1																	1	1.08379	0.918895	1.09058	0.904213	0.86322	0.65495	0.473251	0.366638	0.26274	0.24097	0.193185	0.12117	0.146461	0.0713267	0.0466881					9.97182	-0.140063	0	0.986555		Yes		Yes
C9JLW8	FAM195B	10	5	1	0.966806	0.928098	0.958607	0.956476	0.902138	0.838659	0.809857	0.749907	0.715393	0.711591	0.72682	0.834162	0.696584	0.923283	1.20077	1	0.994075	0.998201	0.962254	1.03694	0.970066	0.908806	0.848058	0.785628	0.676606	0.676715	0.657281	0.688781	0.656642	0.815326	0.993441		-0.0840031	0.819214	0.220859		-0.0950721	0.741094	0.680356	Yes	Yes
F8VTS6	RFPL4AL1		1																	1	0.981747	0.953454	0.954037	0.988113	0.914836	0.843354	0.860845	0.729589	0.67279	0.612228	0.617553	0.684648	0.674274	0.858763	0.883622						-0.0810381	0.717256	0.691559		Yes
I3L273			1																	1	0.887912	1.12162	1.03773	0.89893	0.902927	0.787546	0.68949	0.59581	0.435007	0.398742	0.387689	0.295613	0.261026	0.279126	0.309339					12.0435	-0.100736	0.17187	0.96888		Yes		Yes
O00115	DNASE2	8	7	1	0.997769	0.997635	0.995128	0.993159	0.95705	0.864413	0.775183	0.68547	0.664756	0.690809	0.653377	0.686442	0.605408	0.772077	0.997429	1	0.953567	0.958666	1.00535	0.935352	0.923354	0.871583	0.770901	0.674499	0.626637	0.563955	0.532487	0.526336	0.541824	0.666567	0.819116		-0.126488	0.720497	0.706944		-0.111086	0.606077	0.83532	Yes	Yes
O00116	AGPS	43	34	1	0.99755	0.999094	0.962481	0.962618	0.862256	0.698952	0.450091	0.307608	0.202372	0.148853	0.111199	0.0881947	0.0741843	0.0683189	0.0630283	1	0.980784	0.979149	0.947639	0.941182	0.842442	0.689065	0.471386	0.316863	0.210443	0.154876	0.112475	0.102472	0.077806	0.0788934	0.0907162	9.75933	-0.181085	0.0293664	0.99906	9.76294	-0.171147	0.0303915	0.99736	Yes	Yes	Yes	Yes
O00124	UBXN8	3	2	1	0.962463	0.905273	0.945743	0.898655	0.819868	0.693872	0.528222	0.40066	0.351213	0.321128	0.285734	0.258832	0.243274	0.272415	0.339723	1	0.962426	0.922574	0.884369	0.868311	0.795853	0.726849	0.418701	0.317143	0.253633	0.204833	0.167268	0.119285	0.101684	0.0948646	0.0348964	10.1616	-0.137226	0.233025	0.980757	9.70908	-0.144597	0	0.982109	Yes	Yes	Yes	Yes
O00139-2	KIF2A		2																	1	0.987018	1.04286	1.01585	0.840435	0.68718	0.540131	0.250581	0.18849	0.125861	0.0675372	0.0337906	0.0343126	0.0345198	0.0151123	0.0197215					8.53887	-0.200969	0	0.993844		Yes		Yes
O00139-4	KIF2A	15	15	1	1.02954	0.93364	0.954152	0.86905	0.71685	0.532063	0.293255	0.183258	0.10778	0.0864478	0.0589787	0.0484964	0.0381262	0.0460523	0.0380914	1	1.00546	0.964147	0.907096	0.859199	0.714881	0.512206	0.300267	0.199004	0.122449	0.0928063	0.0641308	0.0566793	0.0422801	0.0497423	0.0521082	8.65176	-0.195641	0	0.995215	8.60592	-0.186917	0	0.995185	Yes	Yes	Yes	Yes
O00142	TK2	5	6	1	1.01653	1.01848	0.939399	0.987857	0.967969	0.811623	0.73392	0.662139	0.509929	0.430796	0.394304	0.306993	0.246549	0.241762	0.194794	1	1.03173	1.02006	1.07836	1.01378	0.979424	0.871418	0.71681	0.589976	0.529456	0.443416	0.359854	0.307851	0.245989	0.226693	0.15895	12.8325	-0.0917216	0	0.993697	12.6749	-0.098564	0.0275675	0.992229	Yes	Yes	Yes	Yes
O00148	DDX39A	16	14	1	1.0231	0.986455	0.998445	0.9445	0.834329	0.67362	0.455009	0.334277	0.212416	0.151522	0.114194	0.0842279	0.0697539	0.0590612	0.0472149	1	1.00047	1.00373	1.00436	0.993921	0.867427	0.681898	0.524007	0.376064	0.257964	0.189775	0.147069	0.111362	0.085578	0.103579	0.0769433	9.74259	-0.164585	0	0.999192	10.0891	-0.15522	0.0222641	0.999103	Yes	Yes	Yes	Yes
O00151	PDLIM1	25	21	1	0.975837	0.998269	0.983626	0.974743	0.922579	0.850007	0.817776	0.723191	0.692867	0.678068	0.671844	0.701397	0.626057	0.779472	0.844447	1	0.965802	0.975688	0.975911	0.995605	0.965566	0.876942	0.780335	0.716262	0.667882	0.583668	0.560157	0.642197	0.603965	0.71054	0.633545		-0.0803882	0.710676	0.858496		-0.0979901	0.619619	0.953436	Yes	Yes
O00154-7	ACOT7	40		1	1.06518	1.07975	1.05234	1.03159	1.01154	0.897503	0.777521	0.646392	0.533642	0.444909	0.340811	0.251962	0.204971	0.144462	0.0983868																	12.776	-0.112971	0	0.990382					Yes		Yes
O00154	ACOT7		43																	1	0.959714	0.995268	0.969777	0.959247	0.900179	0.794501	0.651029	0.55577	0.440178	0.350036	0.27575	0.217942	0.173986	0.109375	0.0672433					11.5707	-0.115518	0	0.994985		Yes		Yes
O00159-3	MYO1C	56	48	1	0.977381	0.961559	0.940431	0.872802	0.743204	0.550283	0.319511	0.2016	0.120486	0.0823131	0.0627718	0.0450966	0.0402585	0.0418545	0.0409615	1	1.00739	0.954006	0.939898	0.872833	0.722971	0.53372	0.338569	0.211292	0.129651	0.0892806	0.0637283	0.0468884	0.0390047	0.0442721	0.0443003	8.79826	-0.192772	0	0.995957	8.75586	-0.186345	0	0.996461	Yes	Yes	Yes	Yes
O00161	SNAP23	16	14	1	1.07444	1.02939	1.04023	1.07903	0.951233	0.927827	0.897744	0.769683	0.751331	0.716821	0.677131	0.681953	0.576942	0.721901	0.986403	1	0.972709	1.0423	0.960067	0.99631	0.934756	0.867597	0.761742	0.665975	0.59931	0.553718	0.527237	0.556823	0.47928	0.651272	0.650994		-0.0892562	0.725467	0.720684		-0.110811	0.562329	0.945469	Yes	Yes
O00165-2	HAX1	2		1	1.01585	0.954171	1.02105	0.961505	0.755176	0.632556	0.400732	0.292732	0.214282	0.164796	0.128578	0.100809	0.0789375	0.0962554	0.067774																	9.37343	-0.164851	0.0263549	0.99684					Yes		Yes
O00165	HAX1		4																	1	1.0534	1.06501	0.997638	0.964094	0.828289	0.598647	0.418418	0.301069	0.190203	0.130453	0.0850682	0.082587	0.0712078	0.068561	0.0687657					9.42109	-0.17839	0.0216325	0.996584		Yes		Yes
O00170	AIP	32	24	1	1.00362	0.979417	0.975808	1.01826	0.93899	0.857628	0.802884	0.690684	0.646359	0.613784	0.56132	0.548479	0.463095	0.352765	0.132383	1	0.950056	0.970911	0.960646	0.959672	0.938038	0.88537	0.782779	0.666552	0.619089	0.531753	0.501822	0.508757	0.449181	0.355879	0.114038	15.2415	-0.0684183	0	0.951615	14.5589	-0.0721113	0	0.9559	Yes	Yes	Yes	Yes
O00178	GTPBP1	20	10	1	1.00422	0.971055	0.981762	0.992376	0.877156	0.765419	0.556295	0.419613	0.301282	0.226609	0.165983	0.127973	0.105065	0.0840105	0.0602233	1	0.942559	1.01851	0.955371	0.925311	0.891154	0.700661	0.529916	0.40566	0.289339	0.198292	0.152329	0.101041	0.0869922	0.0779785	0.0511118	10.5247	-0.144491	0	0.998968	10.2437	-0.148121	0	0.996053	Yes	Yes	Yes	Yes
O00180	KCNK1	2	1	1	1.04475	1.16706	1.2412	1.12479	1.09633	0.939678	0.877181	0.642494	0.570635	0.482468	0.419852	0.351029	0.310992	0.388424	0.149009	1	1.09952	1.16585	1.1766	1.15166	1.03149	0.663823	0.651434	0.539722	0.568826	0.438095	0.575164	0.455931	0.356466	0.387277	0.523057	13.4069	-0.109994	0.198244	0.925309	12.0932	-0.159681	0.465337	0.890482	Yes	Yes	Yes
O00186	STXBP3	16	15	1	1.01404	0.989641	0.980376	0.936248	0.829355	0.644483	0.414717	0.276486	0.187433	0.126612	0.102762	0.0813014	0.0713261	0.0626917	0.0652968	1	0.985644	0.978838	0.980661	0.912179	0.809535	0.616967	0.417365	0.281206	0.180814	0.117269	0.0773849	0.0568531	0.0465836	0.0489635	0.0467582	9.46815	-0.18116	0.0224557	0.999162	9.37447	-0.176984	0	0.998419	Yes	Yes	Yes	Yes
O00189	AP4M1	6	5	1	1.10096	1.00747	1.05666	0.979135	0.835402	0.711023	0.47118	0.334629	0.212807	0.184439	0.139402	0.0996106	0.091747	0.094034	0.112188	1	1.0106	0.937758	0.956326	0.850709	0.748045	0.57198	0.435155	0.284927	0.199417	0.153589	0.100107	0.0648788	0.0579512	0.0527117	0.0503424	9.84164	-0.173713	0.0559328	0.992871	9.14282	-0.159406	0	0.994299	Yes	Yes	Yes	Yes
O00192	ARVCF	8	5	1	1.04171	1.04727	1.02267	0.942861	0.799279	0.675387	0.47622	0.353076	0.237395	0.176786	0.142547	0.125887	0.111567	0.110545	0.129941	1	1.04105	1.01324	0.998675	0.904353	0.832328	0.679281	0.473383	0.360098	0.244065	0.222198	0.184591	0.160326	0.128775	0.143111	0.170474	9.75878	-0.156634	0.0505986	0.995819	9.80591	-0.155515	0.0950093	0.995901	Yes	Yes	Yes	Yes
O00193	SMAP	13	8	1	0.999588	1.02967	1.02215	1.02245	0.995923	0.889454	0.897137	0.790712	0.760403	0.740575	0.76443	0.796773	0.697123	0.853355	1.05968	1	0.98336	0.974317	1.01561	0.997041	0.963668	0.854551	0.811503	0.692718	0.622899	0.556181	0.534242	0.569417	0.581336	0.714487	0.810804		-0.0764355	0.811036	0.594068		-0.112388	0.625598	0.860058	Yes	Yes
O00194	RAB27B	1	1	1	1.18758	1.2806	1.086	1.13182	1.02214	1.06317	0.966788	0.713926	0.795958	0.741232	0.814847	0.671537	0.632083	0.838	1.05649	1	0.869644	1.06176	1.18686	1.29024	0.816	0.917513	0.751078	0.580921	0.511554	0.481421	0.515615	0.431355	0.336415	0.414018	0.458197		-1.21542	0.783009	0.544578	13.0375	-0.119337	0.400971	0.866177	Yes	Yes
O00203	AP3B1	62	53	1	0.976517	0.934614	0.93841	0.911424	0.7688	0.601663	0.376409	0.238337	0.140107	0.0860439	0.0576552	0.0398127	0.0378248	0.0381345	0.0307546	1	0.982609	0.969531	0.982957	0.920434	0.778336	0.574962	0.385261	0.246171	0.151896	0.0956497	0.0678097	0.0417901	0.0314988	0.0325663	0.0269192	9.11798	-0.190331	0	0.994844	9.12078	-0.188116	0	0.998514	Yes	Yes	Yes	Yes
O00206	TLR4		1																	1	1.12935	0.924756	0.991107	0.980839	0.741224	0.938288	1.00512	0.765291	0.54518	0.521612	0.312308	0.143476	0.0759573	0.0897682	0.111166					13.2237	-0.154987	0.00438332	0.945538		Yes		Yes
O00212	RHOD	2	2	1	1.06383	1.0409	1.04364	1.0239	0.84342	0.715813	0.573184	0.366946	0.300849	0.211455	0.212211	0.190321	0.170816	0.21446	0.23474	1	1.06372	1.06426	0.969738	0.891772	0.932544	0.820517	0.61864	0.421899	0.342833	0.304603	0.262625	0.261685	0.210302	0.29271	0.273641	10.1571	-0.166648	0.164944	0.989618	10.6888	-0.175353	0.240308	0.98526	Yes	Yes	Yes	Yes
O00213	APBB1	3	1	1	1.04727	1.00661	1.03077	0.919915	0.842767	0.703971	0.55851	0.369612	0.263395	0.214857	0.201996	0.124834	0.14528	0.12036	0.134225	1	0.873093	0.921355	0.905487	0.84258	0.699315	0.631286	0.476854	0.260038	0.165805	0.164105	0.124443	0.069263	0.0888911	0.0749375	0.0910576	10.1487	-0.146466	0.056689	0.995159	9.15942	-0.151123	0	0.974489	Yes	Yes	Yes	Yes
O00214-2	LGALS8	10	9	1	1.00587	0.971152	0.986786	0.998547	0.94407	0.837924	0.707702	0.559176	0.44447	0.374106	0.290506	0.241372	0.193382	0.136829	0.115349	1	1.01951	0.969703	0.996231	0.987679	0.897027	0.814737	0.6902	0.530449	0.423166	0.368025	0.303987	0.233261	0.189736	0.152844	0.122707	11.9517	-0.112697	0	0.998647	11.7342	-0.109726	0	0.998064	Yes	Yes	Yes	Yes
O00217	NDUFS8	10	5	1	0.955145	0.938173	0.931642	0.921104	0.791296	0.621164	0.463307	0.342093	0.229429	0.167201	0.12581	0.115729	0.0938379	0.0933033	0.0760906	1	1.00219	0.984979	0.995076	0.930694	0.900659	0.68292	0.539311	0.427357	0.325396	0.275303	0.247115	0.203833	0.214085	0.221231	0.215382	9.58341	-0.148138	0	0.994896	10.2867	-0.146254	0.16866	0.997315	Yes	Yes	Yes	Yes
O00219	HAS3	2		1	1.00333	0.915091	0.962643	0.927024	0.796828	0.66449	0.504772	0.385359	0.3001	0.221958	0.170666	0.155514	0.140203	0.115845	0.0886031																	9.99462	-0.130861	0	0.995608					Yes		Yes
O00220	TNFRSF10A	9	6	1	1.04952	1.07849	1.05907	1.03214	0.973901	0.927582	0.888523	0.784425	0.742811	0.735085	0.754788	0.741279	0.668168	0.871146	1.05868	1	0.981588	0.993846	1.05352	1.01912	0.9804	0.820135	0.804358	0.665957	0.621478	0.58872	0.507372	0.523775	0.553064	0.668471	0.743323		-0.0838589	0.795108	0.609212		-0.109489	0.594047	0.906379	Yes	Yes
O00221	NFKBIE	5	5	1	1.08428	0.916394	1.13787	1.15806	0.994469	1.00336	0.855034	0.751854	0.579809	0.683194	0.618523	0.52168	0.394199	0.408232	0.245261	1	1.03751	0.981294	0.955215	1.01493	0.948362	0.889519	0.785773	0.6796	0.573543	0.503491	0.447246	0.414612	0.369081	0.34577	0.134866	15.8681	-0.0693102	0	0.920333	13.931	-0.0802816	0	0.984121	Yes	Yes	Yes	Yes
O00231	PSMD11	61	63	1	0.989055	0.977122	0.976097	0.976603	0.903187	0.764469	0.562946	0.38355	0.241395	0.142131	0.0920325	0.0548746	0.0484653	0.0426197	0.0389308	1	0.972134	0.992771	0.994035	0.967826	0.912377	0.760603	0.582183	0.418623	0.286479	0.190195	0.132405	0.0851829	0.0642306	0.0492458	0.0473556	10.3209	-0.178716	0	0.998613	10.5139	-0.160744	0	0.998898	Yes	Yes	Yes	Yes
O00232	PSMD12	44	59	1	1.00277	0.98184	0.964635	0.980781	0.917327	0.771814	0.582632	0.401089	0.251137	0.16123	0.109566	0.0694413	0.0641939	0.0515728	0.0519836	1	1.06366	0.975862	0.960501	0.980504	0.915241	0.758415	0.593934	0.42922	0.297455	0.204145	0.168665	0.106918	0.0814973	0.075975	0.0774343	10.4466	-0.171717	0	0.998807	10.61	-0.150227	0.000407309	0.996852	Yes	Yes	Yes	Yes
O00233	PSMD9	20	21	1	0.990027	1.01713	1.00372	0.983814	0.926218	0.849666	0.819941	0.734654	0.724312	0.734769	0.732592	0.755069	0.688735	0.871608	1.08814	1	1.00873	1.01039	1.02754	0.984277	0.982833	0.907017	0.853783	0.78638	0.736046	0.675234	0.696547	0.733829	0.712108	0.892563	1.01378		-0.0932658	0.793856	0.529433		-0.0911791	0.781389	0.634224	Yes	Yes
O00244	ATOX1	4	8	1	0.984981	1.16811	1.07224	1.1056	1.20403	1.03995	1.04005	0.825674	0.825956	0.712102	0.700427	0.579018	0.544241	0.778518	1.11793	1	0.960535	1.03977	0.947318	1.09105	1.02463	0.780404	0.596983	0.470889	0.456612	0.322759	0.309161	0.406732	0.387264	0.458055	0.479611		-0.291001	0.750897	0.538289	10.6474	-0.210168	0.399479	0.964103	Yes	Yes
O00255	MEN1	6	5	1	1.02012	1.08179	1.00267	0.930675	0.866827	0.645941	0.457554	0.300668	0.197456	0.143359	0.0958031	0.0577294	0.070799	0.0613509	0.0169971	1	0.988289	1.02154	1.03431	0.953273	0.870028	0.593161	0.425252	0.343258	0.262151	0.189073	0.158521	0.138033	0.112938	0.15008	0.149413	9.6651	-0.174543	0	0.996382	9.53362	-0.175941	0.108198	0.996301	Yes	Yes	Yes	Yes
O00257	CBX4	7	3	1	1.04013	1.02636	1.05064	1.11021	0.931012	0.910271	0.815093	0.710372	0.64785	0.484911	0.40006	0.394034	0.36521	0.409703	0.422222	1	0.912668	0.928535	0.894399	0.789022	0.717064	0.597749	0.49102	0.327505	0.245158	0.193022	0.167611	0.153622	0.101052	0.11002	0.0828987	13.8285	-0.106449	0.342986	0.972092	9.21585	-0.131628	0	0.982124	Yes	Yes		Yes
O00258	WRB	2		1	0.997864	0.97241	1.05169	0.9478	0.828339	0.760972	0.490589	0.336925	0.28003	0.230533	0.177795	0.162703	0.12214	0.145887	0.19648																	10.0086	-0.168361	0.119886	0.991927					Yes		Yes
O00264	PGRMC1	14	13	1	0.961706	0.946863	0.968306	0.980371	0.955619	0.885113	0.841058	0.756384	0.741272	0.734594	0.766089	0.769138	0.64384	0.879859	1.16374	1	0.971404	0.986223	0.97449	0.976021	0.932069	0.851983	0.806393	0.675251	0.61236	0.58106	0.582136	0.609393	0.564571	0.703769	0.749729		-0.0866383	0.809001	0.321407		-0.103223	0.624329	0.907156	Yes	Yes
O00267	SUPT5H	59	44	1	1.00954	1.01096	1.01355	0.998043	0.968418	0.868764	0.706087	0.520819	0.328739	0.210159	0.141886	0.0986391	0.0794719	0.0687652	0.0641477	1	1.00354	0.987904	0.983901	0.97509	0.930671	0.824162	0.697372	0.536721	0.366951	0.243061	0.166156	0.106834	0.0715788	0.0691887	0.0601861	11.2435	-0.171141	0.0156269	0.999311	11.2883	-0.15221	0	0.997691	Yes	Yes	Yes	Yes
O00268	TAF4	10	12	1	0.967648	0.976929	0.986838	0.951244	0.916893	0.809962	0.624915	0.46147	0.369212	0.292576	0.238929	0.194017	0.164051	0.173039	0.217788	1	0.972756	1.00501	1.00099	0.989725	0.904278	0.776742	0.615189	0.45357	0.351063	0.262941	0.20379	0.179267	0.152234	0.151888	0.147408	10.9453	-0.144617	0.134559	0.995798	10.8256	-0.141748	0.0823066	0.999015	Yes	Yes	Yes	Yes
O00273	DFFA	18	17	1	1.02149	1.02618	1.00083	1.03668	0.968851	0.924404	0.86063	0.788887	0.778228	0.782588	0.775722	0.79049	0.66217	0.743395	0.576098	1	0.991074	1.00998	0.948409	0.966461	0.954168	0.880602	0.791009	0.753008	0.683765	0.621481	0.601138	0.610131	0.582731	0.648089	0.397639		-0.0293573	0.17765	0.916551	20.691	-0.0453085	0.111647	0.946811	Yes	Yes		Yes
O00287	RFXAP	1	2	1	1.09805	1.07817	1.07293	1.09423	1.08837	0.85374	0.731846	0.575584	0.593411	0.520975	0.51462	0.522582	0.431176	0.54371	0.608327	1	1.03095	0.980664	1.04693	0.944124	0.891784	0.766668	0.673006	0.556379	0.418647	0.368185	0.427822	0.364771	0.329526	0.430369	0.400926		-0.157661	0.525207	0.939213	11.6956	-0.122585	0.347008	0.981473	Yes	Yes
O00291	HIP1	18	17	1	0.999618	1.01971	1.00629	0.945689	0.829473	0.715222	0.537932	0.387565	0.272743	0.200928	0.163906	0.124953	0.11441	0.111676	0.115455	1	0.978495	1.0447	1.00458	0.964266	0.878747	0.734775	0.549603	0.407027	0.276699	0.222281	0.162795	0.141161	0.108164	0.118744	0.133331	10.1599	-0.145691	0.0293398	0.998041	10.32	-0.153588	0.0596869	0.997657	Yes	Yes	Yes	Yes
O00299	CLIC1	63	52	1	1.00178	0.99098	1.01574	1.03049	0.98935	0.926092	0.868723	0.776994	0.734278	0.688755	0.62992	0.549618	0.435663	0.190221	0.0513214	1	0.998374	1.00292	1.0017	0.980673	0.958057	0.870065	0.796058	0.711438	0.652348	0.591908	0.540491	0.500474	0.414633	0.17219	0.0376599	15.5529	-0.0940106	0	0.942893	14.452	-0.085532	0	0.942732	Yes	Yes	Yes	Yes
O00303	EIF3F	37	37	1	0.997607	0.929083	0.973236	0.94313	0.878767	0.723201	0.531314	0.352301	0.227569	0.150717	0.103277	0.0656852	0.0530081	0.039642	0.0269826	1	1.03027	0.954215	1.0036	0.934978	0.920583	0.753799	0.561841	0.377055	0.271614	0.180373	0.126154	0.0764847	0.0520797	0.035042	0.0256698	10.0874	-0.172854	0	0.996579	10.3609	-0.167724	0	0.997202	Yes	Yes	Yes	Yes
O00308	WWP2	1	4	1	1.14343	1.0036	1.06854	1.09674	0.890392	0.748748	0.589243	0.408222	0.350649	0.1779	0.172816	0.124058	0.133148	0.10423	0	1	1.00911	1.05249	1.06103	0.96414	0.851947	0.679615	0.552113	0.447487	0.352695	0.243299	0.213285	0.176536	0.158739	0.162219	0.158585	10.6249	-0.147658	0	0.981633	10.423	-0.130927	0.0677532	0.994573	Yes	Yes	Yes	Yes
O00311	CDC7	4	1	1	1.027	1.03792	0.964829	0.930695	0.786046	0.599637	0.338098	0.246326	0.147829	0.115961	0.0841969	0.0539794	0.0613867	0.0585189	0.0433587	1	0.919731	1.05955	0.952612	0.877012	0.68222	0.571859	0.383375	0.250547	0.16247	0.102523	0.0913298	0.0524125	0.0299961	0.0420537	0.029466	9.11608	-0.190365	0.0130478	0.997714	8.87348	-0.17281	0	0.991415	Yes	Yes	Yes	Yes
O00327	ARNTL	3	2	1	1.02131	1.00568	1.00167	0.899248	0.849581	0.708168	0.571791	0.432568	0.317238	0.250016	0.199958	0.178822	0.1654	0.200342	0.230098	1	1.05448	0.967314	1.06985	0.856486	0.847858	0.741485	0.622918	0.397468	0.237189	0.131535	0.0970909	0.10135	0.101126	0.107676	0.0719397	10.3424	-0.137698	0.117668	0.992089	10.321	-0.156687	0	0.983148	Yes	Yes	Yes	Yes
O00329	PIK3CD	2	3	1	1.00636	0.857176	0.922125	0.889714	0.761471	0.76237	0.399149	0.246085	0.138984	0.090065	0	0	0.0412623	0.000123265	0	1	1.0039	0.976599	0.909929	0.915446	0.911695	0.708239	0.556439	0.321607	0.205984	0.183089	0.102932	0.0784105	0.0490467	0.0428189	0.097727	9.52815	-0.21106	0	0.974735	10.076	-0.174986	0.0146236	0.991545	Yes	Yes	Yes	Yes
O00330	PDHX	28	19	1	0.976999	0.987466	0.987029	0.987042	0.927386	0.836867	0.764217	0.657661	0.590402	0.538004	0.496979	0.449895	0.37103	0.204465	0.0657358	1	1.01758	1.00613	1.01357	0.989062	0.952366	0.843094	0.728201	0.625254	0.532198	0.479882	0.431051	0.415048	0.350192	0.191955	0.0763555	13.7419	-0.0834886	0	0.962799	13.1337	-0.0884069	0	0.977608	Yes	Yes	Yes	Yes
O00391	QSOX1	1	3	1	0.836093	0.934566	0.889713	0.796759	0.727715	0.657114	0.494464	0.440358	0.349003	0.367298	0.326505	0.391801	0.284713	0.294121	0.383851	1	1.08537	0.957268	0.978451	0.979738	0.907767	0.706671	0.588124	0.470921	0.352694	0.35595	0.301384	0.259832	0.246302	0.314924	0.298917	10.2051	-0.100543	0.189423	0.943154	10.6456	-0.142957	0.25122	0.988761	Yes	Yes	Yes	Yes
O00399	DCTN6	13	10	1	1.01963	1.00214	1.02371	1.02474	0.978108	0.867334	0.81537	0.715135	0.68272	0.628806	0.594291	0.604821	0.535405	0.59672	0.687243	1	0.972898	0.984623	0.948137	0.978857	0.909737	0.815838	0.758231	0.661957	0.559687	0.520054	0.487927	0.503444	0.461434	0.536835	0.512947		-0.0847365	0.592066	0.966889	17.1027	-0.0906056	0.46007	0.981342	Yes	Yes
O00400	SLC33A1	4		1	1.00198	0.951761	0.908656	0.896426	0.821459	0.635861	0.449969	0.301502	0.207903	0.145929	0.0945919	0.0840449	0.0711174	0.0629685	0.0547571																	9.5313	-0.163208	0	0.9942					Yes		Yes
O00401	WASL	15	17	1	1.01538	1.02462	1.01073	1.02019	0.954829	0.834601	0.801637	0.703449	0.650448	0.67509	0.591953	0.562629	0.481955	0.343823	0.202414	1	1.02521	1.04455	1.03955	1.05299	0.96164	0.881374	0.830085	0.705986	0.63508	0.609545	0.554179	0.502727	0.451075	0.356219	0.239238	15.8016	-0.0637304	0	0.953646	15.4042	-0.067421	0	0.980457	Yes	Yes	Yes	Yes
O00410-3	IPO5	124	123	1	1.023	1.02211	1.02598	1.06404	1.00103	0.890548	0.790587	0.653954	0.53511	0.440227	0.35885	0.276534	0.219012	0.109052	0.0464062	1	1.01005	1.0178	0.988892	0.998554	0.9693	0.855501	0.723986	0.619803	0.506783	0.389631	0.326796	0.26766	0.217142	0.101705	0.0529497	12.823	-0.115208	0	0.990576	12.3529	-0.113547	0	0.993491	Yes	Yes	Yes	Yes
O00411	POLRMT	29	27	1	0.972077	0.944896	0.935424	0.835413	0.698875	0.507727	0.276187	0.177772	0.118595	0.0803481	0.0677006	0.0503804	0.050423	0.0561669	0.0381861	1	0.961952	0.93802	0.94199	0.83331	0.664448	0.463449	0.267623	0.179217	0.103118	0.073855	0.0505497	0.0444945	0.0381752	0.0358984	0.0308115	8.49039	-0.190077	0	0.994462	8.31383	-0.195905	0	0.995551	Yes	Yes	Yes	Yes
O00418	EEF2K	13	10	1	0.988899	0.997653	0.969943	0.948475	0.812362	0.647958	0.424554	0.301018	0.210342	0.161912	0.131925	0.114184	0.0978651	0.0821689	0.0952877	1	0.97123	1.0118	1.00191	0.919883	0.800657	0.599214	0.399242	0.265401	0.172402	0.121081	0.0919813	0.0615752	0.0422265	0.0606764	0.0594302	9.51787	-0.170976	0.0464061	0.999054	9.28044	-0.176805	0.000569503	0.998751	Yes	Yes	Yes	Yes
O00422	SAP18	10	5	1	0.94748	0.936479	0.92527	0.861053	0.760271	0.583723	0.40193	0.295323	0.202203	0.159262	0.128674	0.117147	0.091429	0.0957398	0.105797	1	0.923791	0.875011	0.879221	0.871315	0.754881	0.547605	0.411777	0.29153	0.208313	0.153391	0.117427	0.140676	0.102697	0.13411	0.125275	9.16375	-0.150559	0.00787972	0.992739	9.05637	-0.152099	0.0338856	0.979811	Yes	Yes	Yes	Yes
O00423-3	EML1	4	6	1	1.06396	1.01776	1.0425	0.999285	0.949164	0.803648	0.634796	0.472149	0.397202	0.321876	0.24828	0.189783	0.179138	0.12492	0.0870649	1	0.952205	0.960296	1.00021	0.96339	0.855319	0.70287	0.603547	0.435265	0.312864	0.25059	0.192765	0.185192	0.149474	0.114854	0.0651377	11.279	-0.125301	0.0201973	0.995195	10.5741	-0.128683	0	0.996332	Yes	Yes	Yes	Yes
O00425	IGF2BP3	23	21	1	0.944818	0.925146	0.92883	0.871937	0.745284	0.567074	0.361134	0.23881	0.155152	0.100631	0.0697633	0.0544289	0.04322	0.037994	0.036224	1	1.01763	0.953124	0.937651	0.917553	0.786155	0.586342	0.388969	0.256587	0.169195	0.108613	0.0791889	0.0626121	0.0412199	0.0424042	0.0428682	8.94016	-0.179777	0	0.992567	9.18244	-0.179707	0	0.997118	Yes	Yes	Yes	Yes
O00429-2	DNM1L	57		1	0.989591	0.969227	0.962187	0.934501	0.810828	0.652569	0.42854	0.277291	0.186878	0.128913	0.0983086	0.0716999	0.0651812	0.0620374	0.0554239																	9.49362	-0.173759	0.00393979	0.99817					Yes		Yes
O00429-6	DNM1L		48																	1	0.978552	0.978179	0.977502	0.930683	0.830944	0.661867	0.459279	0.290632	0.1957	0.143376	0.0982488	0.0800381	0.059569	0.057514	0.0577203					9.63291	-0.170129	0	0.99857		Yes		Yes
O00442-2	RTCA	12	16	1	1.02764	0.989848	1.01388	0.964397	0.844711	0.711471	0.450138	0.309208	0.202922	0.147981	0.108489	0.0754378	0.0582027	0.0545501	0.0213825	1	0.996602	0.969033	0.986381	0.901063	0.823354	0.650909	0.510491	0.345296	0.262107	0.18706	0.13666	0.112175	0.105371	0.103444	0.101028	9.79475	-0.174777	0	0.998636	9.84039	-0.144111	0.00497573	0.997354	Yes	Yes	Yes	Yes
O00443	PIK3C2A	26	19	1	1.15124	1.2094	1.19321	1.13113	0.964434	0.733927	0.454013	0.307457	0.228424	0.179929	0.157055	0.133321	0.111954	0.116843	0.12632	1	1.13816	1.18691	1.1984	1.11883	0.960983	0.680722	0.469038	0.335445	0.230933	0.180432	0.143025	0.123437	0.0836946	0.0936474	0.0825608	9.86204	-0.228199	0.121651	0.960094	9.9107	-0.19895	0.0822797	0.963081	Yes	Yes	Yes	Yes
O00458	IFRD1	3	3	1	1.01458	0.990845	1.04945	0.964964	0.876876	0.764967	0.636066	0.509628	0.454139	0.448934	0.439895	0.372903	0.269225	0.193484	0.0836125	1	1.0766	1.0955	1.07368	1.07236	0.910049	0.766446	0.706063	0.568008	0.48244	0.475616	0.401935	0.388208	0.344135	0.199032	0.0837006	12.0536	-0.0906058	0	0.975758	12.6215	-0.0889797	0	0.963153	Yes	Yes	Yes	Yes
O00459	PIK3R2	12	12	1	1.02324	1.0007	0.994324	0.975512	0.836369	0.716097	0.467267	0.326703	0.216386	0.160833	0.124083	0.113579	0.0958738	0.0915317	0.0709763	1	1.00908	1.00372	0.998406	0.934445	0.86874	0.715595	0.485978	0.320848	0.236734	0.161561	0.108442	0.0864459	0.0663561	0.0639718	0.0535347	9.83891	-0.17299	0.0409249	0.99856	9.93763	-0.167571	0.00433304	0.998956	Yes	Yes	Yes	Yes
O00461	GOLIM4	13	13	1	0.976342	0.973565	0.983271	0.948894	0.894694	0.791013	0.756377	0.671655	0.62478	0.610181	0.634823	0.686675	0.585933	0.769356	0.885817	1	1.02298	0.998767	0.990463	0.998806	0.921369	0.865659	0.815758	0.705962	0.63478	0.617242	0.580485	0.569187	0.591884	0.716121	0.775121		-0.105022	0.684667	0.780693		-0.0945494	0.634861	0.899805	Yes	Yes
O00462	MANBA	18	13	1	1.86318	1.01709	0.937053	1.05947	0.885793	0.761269	0.633794	0.494539	0.439024	0.395145	0.398252	0.372353	0.322329	0.359642	0.452771	1	0.936364	0.953189	0.994657	0.925188	0.855283	0.713769	0.561689	0.441429	0.365017	0.292087	0.2563	0.270131	0.258674	0.301817	0.306433	11.2269	-0.141157	0.361209	0.691949	10.41	-0.141885	0.236749	0.988741	Yes	Yes		Yes
O00463	TRAF5		1																	1	0.976789	0.982286	0.713164	0.774303	0.613343	0.83812	0.508569	0.296586	0.173405	0.126121	0.120644	0	0.0912816	0.0904484	0					9.41854	-0.151016	0	0.902236		Yes		Yes
O00468	AGRN	5	3	1	1.0709	1.007	0.98046	1.00078	0.849686	0.740553	0.539767	0.415346	0.29025	0.232844	0.183517	0.144706	0.106709	0.0743864	0.0658775	1	0.98226	1.01917	1.02907	0.952498	0.935519	0.784173	0.588495	0.415501	0.25771	0.223471	0.187638	0.117647	0.0818013	0.0428041	0.0436202	10.4085	-0.140555	0	0.996384	10.6128	-0.155482	0	0.997364	Yes	Yes	Yes	Yes
O00469-2	PLOD2	5	11	1	0.989342	1.03634	1.01053	0.963673	0.954358	0.766151	0.584073	0.411761	0.295405	0.210822	0.166832	0.111343	0.0770926	0.0762868	0.0607884	1	1.01732	1.08023	0.996107	0.999035	0.951845	0.809248	0.64493	0.45578	0.345997	0.26472	0.184628	0.139203	0.107989	0.0735189	0.0459799	10.599	-0.156185	0.0100299	0.998436	11.0379	-0.14483	0	0.996598	Yes	Yes	Yes	Yes
O00471	EXOC5	19	20	1	0.990488	0.994832	0.979141	0.8935	0.773666	0.566334	0.334289	0.216475	0.133568	0.0922871	0.0800292	0.0660672	0.0634963	0.0652358	0.0491116	1	1.01884	0.977321	0.993956	0.863809	0.707211	0.52355	0.321441	0.191153	0.110911	0.0743464	0.0563909	0.0344562	0.0314275	0.0267451	0.0290861	8.94915	-0.193851	0.0162659	0.998245	8.65765	-0.195965	0	0.997342	Yes	Yes	Yes	Yes
O00483	NDUFA4	10	10	1	1.04414	1.00921	0.986227	1.0407	0.900424	0.715986	0.566795	0.387791	0.287038	0.202351	0.167712	0.156688	0.131354	0.139983	0.164887	1	1.12693	1.07565	1.06882	1.06727	0.961534	0.780528	0.571342	0.393392	0.291841	0.216234	0.16921	0.137688	0.11053	0.11945	0.107032	10.271	-0.167667	0.105339	0.995783	10.4917	-0.176458	0.0866147	0.987287	Yes	Yes	Yes	Yes
O00487	PSMD14	23	21	1	0.975325	0.951346	0.96434	0.930865	0.889204	0.737094	0.550987	0.376784	0.233027	0.15081	0.100626	0.0689266	0.0531554	0.04484	0.0397877	1	0.976674	0.938203	0.943152	0.954045	0.884602	0.747054	0.576658	0.411022	0.277229	0.179732	0.115664	0.0616028	0.0424637	0.0274995	0.0220361	10.2055	-0.171491	0	0.996404	10.3968	-0.166433	0	0.994051	Yes	Yes	Yes	Yes
O00488	ZNF593	7	7	1	0.930805	0.896507	0.960688	0.982256	0.846462	0.680805	0.515967	0.425381	0.337187	0.306898	0.255773	0.272213	0.216795	0.181321	0.134706	1	1.0461	1.05851	0.976713	0.92354	0.878368	0.769192	0.573024	0.432508	0.340661	0.300831	0.272434	0.267318	0.256837	0.262336	0.201481	10.382	-0.126662	0.111055	0.986329	10.6138	-0.14105	0.196348	0.992944	Yes	Yes	Yes	Yes
O00499-2	BIN1	22		1	0.999794	0.990723	0.996935	0.967411	0.96721	0.857014	0.819235	0.704034	0.600865	0.491211	0.359804	0.242559	0.194586	0.154398	0.109702																	13.1565	-0.111706	0	0.993039					Yes		Yes
O00499	BIN1		15																	1	0.976914	0.986428	1.02627	0.988023	0.954097	0.893952	0.801052	0.708478	0.60932	0.499227	0.38613	0.252861	0.185835	0.136755	0.09886					13.233	-0.112811	0	0.992098		Yes		Yes
O00505	KPNA3	8	9	1	0.967861	1.03336	0.9704	0.999546	0.919469	0.722095	0.483231	0.359887	0.214713	0.143353	0.10474	0.075458	0.0767165	0.122417	0.0381468	1	1.00146	1.04922	1.01085	1.06554	0.957915	0.730791	0.521202	0.337961	0.250677	0.209809	0.138165	0.0926191	0.0751761	0.0759495	0.0639797	10.0107	-0.185697	0.0377958	0.996622	10.1838	-0.182391	0.0485699	0.995037	Yes	Yes	Yes	Yes
O00506	STK25	7	4	1	0.938882	0.923644	0.918389	0.817631	0.713099	0.528808	0.314003	0.222032	0.141044	0.0819391	0.0615901	0.045611	0.044741	0.0557429	0.0507959	1	0.971689	0.930281	0.87843	0.83143	0.681721	0.510977	0.328677	0.197436	0.134845	0.088859	0.0607881	0.0567579	0.05229	0.0434439	0.0483454	8.61473	-0.179811	0	0.989343	8.50606	-0.178767	0	0.990218	Yes	Yes	Yes	Yes
O00507	USP9Y	1	1	1	1.00836	0.936936	0.99957	0.852468	0.756777	0.68357	0.645424	0.49129	0.430541	0.33583	0.311021	0.291181	0.231087	0.124521	0.0962004	1	1.02368	0.910713	0.929659	0.808782	0.775059	0.710443	0.528475	0.381982	0.324784	0.239305	0.179646	0.13748	0.0924642	0.0986946	0.0721082	10.9247	-0.100012	0	0.979916	9.98267	-0.128934	0	0.981466	Yes	Yes	Yes	Yes
O00512	BCL9	17	8	1	1.02978	1.0199	1.05664	0.999838	0.977708	0.858526	0.816395	0.708294	0.676512	0.66111	0.641335	0.661933	0.598794	0.711408	0.877723	1	0.996705	0.965919	0.98713	0.998476	0.926241	0.790724	0.7178	0.603957	0.562273	0.482917	0.487669	0.495717	0.499773	0.598422	0.630052		-0.10151	0.688289	0.86111		-0.123396	0.527869	0.958516	Yes	Yes
O00515	LAD1	28	17	1	0.966747	0.989649	0.978848	0.93691	0.895602	0.750532	0.620787	0.515251	0.386464	0.312509	0.230062	0.182474	0.147631	0.139134	0.156	1	0.976548	0.93666	0.941932	0.917801	0.847712	0.731989	0.621283	0.484009	0.375662	0.278521	0.209063	0.153388	0.132764	0.126134	0.115896	11.1235	-0.116579	0	0.996468	10.8294	-0.121799	0	0.99237	Yes	Yes	Yes	Yes
O00519	FAAH	4	4	1	1.03789	1.03063	0.994575	0.918798	0.83387	0.660789	0.483312	0.33705	0.228331	0.167782	0.138035	0.142821	0.120394	0.113129	0.117655	1	1.09506	1.0418	0.960588	0.9908	0.892688	0.784263	0.596598	0.520936	0.475594	0.374265	0.379917	0.426697	0.337358	0.506695	0.501739	9.73681	-0.161538	0.0590084	0.997187	11.3327	-0.153149	0.415631	0.961986	Yes	Yes	Yes
O00522	KRIT1		3																	1	1.05336	0.993923	1.01944	0.893392	0.798924	0.678454	0.421366	0.237392	0.139861	0.106711	0.0641655	0.0621427	0.039975	0.0479554	0.0531489					9.41951	-0.188732	0	0.994046		Yes		Yes
O00534	VWA5A	3	5	1	1.08094	1.04874	0.919559	0.983507	0.940407	0.80697	0.782283	0.646221	0.575479	0.42614	0.263477	0.157599	0.198002	0.128641	0.102324	1	1.22575	1.09631	1.03281	0.986607	0.989831	0.875779	0.729785	0.637696	0.548986	0.387267	0.313597	0.215318	0.154289	0.138514	0.148491	12.4836	-0.117901	0	0.979872	12.4614	-0.115026	0	0.968176	Yes	Yes	Yes	Yes
O00541	PES1	23	22	1	1	0.957337	0.977836	0.957342	0.867661	0.698015	0.520904	0.370548	0.24685	0.168062	0.10851	0.0791988	0.0640615	0.0494385	0.0434232	1	1.02495	0.960398	0.978474	0.944758	0.868305	0.713074	0.556376	0.385024	0.278185	0.190048	0.132018	0.0917968	0.0637297	0.0533144	0.0617217	10.0617	-0.162886	0	0.998267	10.2389	-0.154735	0	0.997449	Yes	Yes	Yes	Yes
O00559	EBAG9	6	4	1	1.04176	1.0786	1.13254	1.05333	0.975032	0.881084	0.88859	0.739898	0.788184	0.695318	0.607114	0.595449	0.552063	0.567336	0.629904	1	1.04083	0.993005	1.03791	0.951479	0.979331	0.775389	0.64078	0.585329	0.518653	0.385488	0.348688	0.346241	0.354094	0.363258	0.314291		-0.0610144	0.530194	0.925078	11.9935	-0.113174	0.286977	0.987872	Yes	Yes		Yes
O00560-2	SDCBP	1	12	1	1.05394	0.968825	1.03088	0.935004	0.887191	0.74694	0.702202	0.685438	0.482343	0.429607	0.478665	0.368831	0.331342	0.323377	0.259514	1	0.986475	1.1136	1.10238	1.05417	1.0143	0.950282	0.812525	0.733657	0.646169	0.620299	0.554152	0.526901	0.512418	0.563276	0.405922	13.1525	-0.0753797	0	0.982062	18.1897	-0.0801147	0.444672	0.954518	Yes	Yes	Yes
O00560	SDCBP	13		1	1.00772	1.00979	1.01251	0.994134	0.941266	0.828974	0.76669	0.654916	0.627729	0.584683	0.532246	0.491086	0.452666	0.422506	0.288883																	15.4029	-0.061421	0	0.989406					Yes		Yes
O00562	PITPNM1	6	6	1	1.02019	1.00745	0.9786	1.01847	0.92062	0.756243	0.5764	0.423843	0.292959	0.241925	0.174396	0.127631	0.152307	0.106743	0.0880435	1	0.935316	0.968821	0.923204	0.943003	0.889587	0.703181	0.57738	0.44259	0.29125	0.23924	0.18738	0.132182	0.0949406	0.103751	0.0687925	10.5604	-0.153418	0.0537227	0.99834	10.4811	-0.137411	0	0.993269	Yes	Yes	Yes	Yes
O00566	MPHOSPH10	4	4	1	1.06577	0.99549	0.964067	0.870871	0.73511	0.54447	0.326784	0.22524	0.163788	0.130055	0.105354	0.104534	0.0975174	0.117732	0.0947424	1	1.02385	0.95743	0.998274	0.908242	0.658895	0.515416	0.3272	0.209535	0.141283	0.0921324	0.0752442	0.12347	0.0646223	0.105246	0.131025	8.78444	-0.184416	0.0553703	0.995568	8.57101	-0.194622	0.0572082	0.993839	Yes	Yes	Yes	Yes
O00567	NOP56	18	16	1	0.921932	0.958539	0.901655	0.846511	0.706174	0.509124	0.297983	0.206206	0.139962	0.116428	0.097788	0.10726	0.082812	0.105302	0.117701	1	0.982507	0.967762	0.928612	0.891935	0.701366	0.504377	0.317127	0.204925	0.132369	0.0995055	0.0848864	0.0982199	0.0713449	0.0934113	0.116024	8.53449	-0.184922	0.0482318	0.989215	8.59897	-0.194753	0.0484765	0.995393	Yes	Yes	Yes	Yes
O00571	DDX3X	41	39	1	0.937784	0.933709	0.899875	0.824064	0.669079	0.472553	0.254133	0.155771	0.0960222	0.0700129	0.05813	0.0540155	0.0458428	0.049979	0.0526983	1	0.969255	0.929706	0.899275	0.836346	0.678216	0.463702	0.277529	0.169018	0.104875	0.0817982	0.0631035	0.0591498	0.0502036	0.0610987	0.0634309	8.27655	-0.194649	0	0.99055	8.33483	-0.188976	0	0.992505	Yes	Yes	Yes	Yes
O00584	RNASET2	16	13	1	0.994171	0.987478	1.02957	1.00146	0.952358	0.881471	0.829651	0.738545	0.709393	0.723638	0.696181	0.700394	0.646472	0.769862	0.919867	1	0.979528	0.966898	0.976845	0.914219	0.835931	0.738055	0.67032	0.526316	0.475098	0.456209	0.381526	0.424407	0.395964	0.459084	0.462211		-0.0879099	0.736292	0.816	12.3746	-0.103567	0.378792	0.98068	Yes	Yes
O00592	PODXL	14	11	1	1.01079	0.993358	0.960605	0.982803	0.959517	0.872079	0.835956	0.76819	0.787468	0.76836	0.7711	0.77613	0.707072	0.910501	1.15529	1	1.04384	1.0514	1.04924	1.0023	0.984717	0.934439	0.88089	0.786807	0.745741	0.676317	0.687784	0.714614	0.700583	0.883513	1.02108		-0.0936983	0.831062	0.36908		-0.094183	0.775693	0.650158	Yes	Yes
O00622	CYR61		1																	1	1.0481	0.967407	0.896528	0.888961	0.879379	1.04853	0.877715	0.541943	0.424304	0.670223	0.568181	0.366809	0.234941	0.440339	0.383969					11.6194	-0.305794	0.437714	0.858632		Yes
O00623	PEX12	1	2	1	1.10197	1.03344	1.08076	0.982815	0.787105	0.715015	0.511574	0.376662	0.331595	0.34226	0.203659	0.209661	0.206239	0.248001	0.292488	1	1.08903	0.985128	0.968286	0.924391	0.732943	0.619454	0.434921	0.308435	0.186551	0.188452	0.112801	0.0880139	0.0651025	0.0856674	0.0613045	10.047	-0.150843	0.202776	0.979067	9.3471	-0.155133	0	0.9939	Yes	Yes	Yes	Yes
O00625	PIR	25	18	1	0.996086	1.00757	0.986295	0.995121	0.96403	0.889767	0.850959	0.752261	0.726357	0.728655	0.702364	0.665994	0.587879	0.696013	0.772232	1	0.969099	0.999229	0.983058	0.966457	0.980485	0.833842	0.755635	0.625498	0.558163	0.504273	0.487985	0.497493	0.472515	0.523496	0.504772		-0.067334	0.677075	0.933688	16.1587	-0.113505	0.478678	0.990627	Yes	Yes
O00628	PEX7	1	2	1	0.916651	0.878615	0.955812	0.780927	0.858561	0.772759	0.720765	0.655253	0.54934	0.594282	0.627341	0.587621	0.507455	0.676107	0.682304	1	0.957125	1.06114	1.01391	0.956524	0.858647	0.762233	0.605952	0.581422	0.422111	0.422628	0.420241	0.40623	0.271401	0.286319	0.358344		-0.0553728	0.437383	0.806191	11.8543	-0.100668	0.247708	0.981133	Yes	Yes		Yes
O00629	KPNA4	20	13	1	0.997044	0.941991	0.980322	0.992999	0.884282	0.779869	0.62912	0.520723	0.411094	0.277958	0.163099	0.0984882	0.0826763	0.0765132	0.0654336	1	1.0102	1.00898	0.985457	0.964251	0.933537	0.840229	0.705208	0.529537	0.440112	0.337558	0.207314	0.109906	0.0760359	0.0609721	0.0524697	11.0829	-0.139106	0	0.991804	11.5575	-0.141083	0	0.994076	Yes	Yes	Yes	Yes
O00635	TRIM38	1	1	1	0.986205	0.900539	0.857101	0.878823	0.822612	0.631121	0.44925	0.209814	0.21307	0.111318	0	0	0.0914926	0.000170374	0	1	1.18529	1.02611	0.871182	1.02166	0.635068	0.592071	0.446484	0.24669	0.229972	0.0558449	0.122922	0	0.0815841	0.000170641	0.0633307	9.38682	-0.191538	0	0.976728	9.08254	-0.170815	0	0.963754	Yes	Yes	Yes	Yes
O00716	E2F3	2	4	1	1.00844	0.984992	0.998416	0.999458	0.88864	0.732022	0.617396	0.476398	0.364615	0.262303	0.211946	0.191646	0.177086	0.151434	0.069194	1	0.956567	1.03929	1.06709	0.93603	0.900155	0.73674	0.560358	0.408707	0.271796	0.203471	0.172061	0.13328	0.137345	0.126443	0.048899	10.9309	-0.123063	0	0.997711	10.3948	-0.149707	0.0295865	0.994526	Yes	Yes	Yes	Yes
O00743-3	PPP6C	16	16	1	0.983587	0.934855	0.966648	0.95239	0.823062	0.728284	0.64668	0.572878	0.553977	0.6024	0.581689	0.642993	0.566561	0.745692	0.921156	1	0.998155	0.994637	0.934077	0.94131	0.859227	0.734996	0.611185	0.54398	0.49351	0.473193	0.465975	0.534715	0.538349	0.692136	0.746654		-0.152263	0.648774	0.730634		-0.155624	0.559727	0.864793	Yes	Yes
O00746	NME4	1	1	1	1.00907	1.02557	1.01754	1.04743	0.93415	0.754795	0.581557	0.483505	0.417534	0.364093	0.283102	0.254997	0.230512	0.217775	0.16797	1	0.913394	1.07466	0.983899	1.01846	0.902623	0.777405	0.600558	0.47227	0.357179	0.375646	0.337685	0.253222	0.185736	0.232641	0.128186	11.1311	-0.124215	0.142309	0.993601	11.1757	-0.118521	0.103031	0.984063	Yes	Yes	Yes	Yes
O00750	PIK3C2B	1	2	1	1.04262	0.930023	0.939597	0.9025	0.73188	0.624398	0.374138	0.250819	0.151931	0.134883	0.086327	0.0809108	0.0911697	0.0538322	0.0998635	1	0.995777	1.09134	1.06475	0.94935	0.875613	0.656879	0.503133	0.378122	0.267533	0.190761	0.200539	0.132219	0.127999	0.129421	0.165863	9.09925	-0.17214	0.0146044	0.991294	9.9382	-0.160604	0.0941284	0.991832	Yes	Yes	Yes	Yes
O00754	MAN2B1	15	12	1	0.96472	0.977828	0.975044	0.970399	0.934038	0.810821	0.749591	0.680832	0.603657	0.58323	0.631532	0.661603	0.562512	0.691968	1.06134	1	1.07077	1.09375	1.12443	0.932889	0.934388	0.9509	0.833879	0.717066	0.638265	0.591441	0.566868	0.57328	0.576587	0.728928	0.792049		-0.125554	0.686027	0.605012		-0.139521	0.636761	0.85383	Yes	Yes
O00762	UBE2C	14	12	1	1.04605	1.07692	1.05082	1.06212	0.996846	0.918814	0.811963	0.71356	0.621614	0.571758	0.517528	0.45949	0.392339	0.410737	0.387026	1	1.03208	1.09069	1.12355	1.05576	1.0417	0.913719	0.775452	0.694626	0.618316	0.549306	0.478765	0.469864	0.442872	0.421514	0.304532	14.9015	-0.0850971	0.318377	0.983397	14.6405	-0.0845593	0.292244	0.965744	Yes	Yes		Yes
O00763	ACACB		16																	1	1.03583	1.02761	1.01282	0.936894	0.785436	0.61344	0.426515	0.279186	0.17881	0.130226	0.106012	0.0653511	0.0604338	0.0579961	0.0527728					9.37052	-0.170894	0	0.998401		Yes		Yes
O00764	PDXK	23	12	1	1.00718	1.0006	1.03663	0.987892	0.919	0.87854	0.813263	0.738354	0.704315	0.723665	0.717198	0.722993	0.621554	0.822804	1.06236	1	1.0219	0.988298	1.02682	0.998412	0.984944	0.828975	0.830495	0.768377	0.682023	0.632801	0.644957	0.696504	0.65977	0.857915	0.966352		-0.0834998	0.765624	0.588896		-0.103439	0.740803	0.694657	Yes	Yes
O00767	SCD	14	10	1	1.0405	0.90378	0.930065	0.866805	0.766897	0.531093	0.364871	0.230871	0.153343	0.0913596	0.0641903	0.0463258	0.0383676	0.0342519	0.0326829	1	1.01734	0.943889	0.967273	0.926669	0.774684	0.635515	0.428312	0.287881	0.189456	0.130688	0.100241	0.0770506	0.0632838	0.0545106	0.0673744	8.89984	-0.184133	0	0.991936	9.40327	-0.166837	0	0.996787	Yes	Yes	Yes	Yes
O14492	SH2B2	1	1	1	1.00682	1.1853	0.995064	0.923399	0.876375	0.805689	0.572936	0.474939	0.314308	0.247331	0.28487	0.383184	0.227554	0.238908	0.287066	1	1.08273	1.04361	1.09621	1.00261	0.829019	0.734433	0.509752	0.388138	0.262974	0.201658	0.157667	0.0908498	0.0572616	0.0670979	0.0546539	10.6182	-0.158416	0.242465	0.963445	10.1762	-0.153967	0	0.990611	Yes	Yes	Yes	Yes
O14494	PPAP2A		3																	1	1.07623	1.09102	1.20752	0.985801	1.08734	0.861057	0.741848	0.654857	0.538271	0.622323	0.540255	0.511441	0.552378	0.534717	0.386868						-0.109411	0.493897	0.909716		Yes
O14495	PPAP2B	1		1	0.98556	1.08152	1.06621	1.03538	0.936698	0.885033	0.682885	0.658724	0.583321	0.532252	0.585137	0.475469	0.344179	0.329273	0.197614																	14.2921	-0.0718778	0	0.959935					Yes		Yes
O14497	ARID1A	42	34	1	0.973657	0.991383	0.978125	0.936904	0.863098	0.73002	0.568404	0.438271	0.343676	0.267572	0.23055	0.187755	0.157643	0.15048	0.153296	1	0.990298	0.96914	0.958934	0.919736	0.845097	0.71732	0.558713	0.433062	0.333768	0.254868	0.205385	0.162728	0.130575	0.102953	0.087892	10.5897	-0.12746	0.0546127	0.998612	10.4746	-0.127374	0	0.997865	Yes	Yes	Yes	Yes
O14519	CDK2AP1	1	1	1	0.966376	0.960294	0.943158	0.933811	0.810108	0.77227	0.765787	0.620902	0.732287	0.566593	0.645463	0.668078	0.639605	0.813912	0.858215	1	1.02259	0.962932	1.1842	0.850021	0.880972	0.749014	0.758793	0.615682	0.578735	0.523139	0.468509	0.577679	0.519369	0.662552	0.682786		-0.0965569	0.696904	0.724722		-0.0939776	0.559746	0.850703	Yes	Yes
O14523-2	C2CD2L	2	1	1	1.039	1.09595	1.118	0.963152	0.944872	0.75813	0.535069	0.396693	0.299716	0.237681	0.206635	0.176437	0.147458	0.127011	0.109481	1	1.0356	1.07634	1.03768	1.08083	0.985297	0.760823	0.557542	0.458272	0.298363	0.198015	0.214526	0.138923	0.111301	0.0847007	0.0602722	10.4053	-0.162026	0.0995306	0.988456	10.6571	-0.158155	0.0419433	0.989442	Yes	Yes	Yes	Yes
O14524	TMEM194A	3	1	1	1.08571	1.07974	1.12106	1.03716	0.969382	0.817331	0.615097	0.449281	0.284165	0.211541	0.156149	0.129148	0.115598	0.0990314	0.0643036	1	1.21488	1.07719	0.899863	0.691089	0.935524	0.870541	0.801434	0.613397	0.39776	0.35949	0.300662	0.248331	0.22617	0	0	10.7754	-0.170385	0.0519045	0.988409	12.1011	-0.127706	0	0.9145	Yes	Yes	Yes	Yes
O14526	FCHO1	4	2	1	0.960772	0.98262	0.948995	0.82668	0.769579	0.623974	0.471559	0.366375	0.246086	0.218634	0.173107	0.137867	0.122832	0.0939208	0.0972212	1	0.924738	0.958512	1.06428	1.00007	1.02253	0.822819	0.768226	0.540329	0.453912	0.41262	0.294856	0.259073	0.180902	0.122334	0.120023	9.55076	-0.132576	0	0.994275	12.1556	-0.114244	0	0.985828	Yes	Yes	Yes	Yes
O14530	TXNDC9	14	8	1	1.0149	0.991351	1.00061	1.00991	0.941813	0.83419	0.771403	0.62436	0.539149	0.503119	0.491562	0.473065	0.428527	0.432352	0.281599	1	1.05073	1.07014	1.09956	1.04512	1.03798	0.893495	0.80071	0.719575	0.586993	0.473972	0.428631	0.47123	0.420457	0.466714	0.28464	14.1021	-0.0803074	0.261465	0.985484	13.9691	-0.099984	0.335347	0.965822	Yes	Yes	Yes
O14531	DPYSL4	5	7	1	0.975461	1.01785	0.957733	0.938962	0.953621	0.812934	0.677539	0.566078	0.478957	0.432577	0.423973	0.373836	0.313984	0.391995	0.510498	1	1.08161	0.977418	1.00218	0.979431	0.856119	0.747595	0.609261	0.463566	0.365486	0.277734	0.197219	0.178634	0.140505	0.160697	0.129644	12.0337	-0.130989	0.383173	0.972233	10.8279	-0.12551	0.0253645	0.994775	Yes	Yes		Yes
O14544	SOCS6	6	5	1	1.01491	1.03832	0.965191	0.926171	0.829009	0.690448	0.470047	0.339147	0.229285	0.162398	0.125307	0.101257	0.0756505	0.0927186	0.099439	1	1.00579	0.974548	0.992504	0.912118	0.836674	0.714649	0.540833	0.369285	0.242576	0.184653	0.16133	0.115469	0.13372	0.114091	0.119138	9.79485	-0.160827	0.0230302	0.996903	10.0665	-0.152491	0.0444087	0.99586	Yes	Yes	Yes	Yes
O14545	TRAFD1	11	10	1	1.0346	1.14347	1.08866	1.05158	0.989292	0.817623	0.618361	0.475824	0.334526	0.255973	0.196937	0.155251	0.140526	0.119291	0.123287	1	1.0194	1.01898	1.16603	0.964681	0.935645	0.782742	0.618629	0.447012	0.329632	0.224017	0.167208	0.130866	0.126139	0.107582	0.0768294	10.9468	-0.159596	0.0859376	0.985679	10.8029	-0.149865	0.029438	0.987914	Yes	Yes	Yes	Yes
O14548	COX7A2L	6	3	1	0.979342	0.98001	0.958903	0.970809	0.893387	0.772606	0.611146	0.462756	0.3581	0.27322	0.235587	0.232412	0.168621	0.175163	0.189694	1	1.03808	0.981177	0.954941	1.00673	0.892259	0.835715	0.638989	0.470697	0.332941	0.268902	0.205262	0.171171	0.153175	0.155038	0.139326	10.8419	-0.136522	0.117536	0.997269	10.9696	-0.149721	0.0921431	0.99641	Yes	Yes	Yes	Yes
O14561	NDUFAB1	6	5	1	1.06102	0.913175	1.11287	0.99322	0.976816	0.910668	0.894174	0.72446	0.620327	0.655163	0.56379	0.612846	0.648132	0.56123	0.62554	1	0.90674	1.12842	1.0966	1.16728	1.19119	1.00809	0.808563	0.759515	0.678934	0.648876	0.638163	0.645966	0.685079	0.679432	0.93333		-0.113151	0.598391	0.934188		-0.199324	0.706598	0.734193	Yes	Yes
O14562	UBFD1	22	17	1	0.97593	1.001	0.976576	0.976366	0.922819	0.842649	0.776026	0.696595	0.626487	0.59198	0.557367	0.543825	0.447299	0.39942	0.222626	1	0.994715	0.99373	1.04726	1.00565	0.954763	0.865943	0.748302	0.680934	0.609905	0.525275	0.498999	0.450645	0.414945	0.355656	0.171084	15.4424	-0.0626492	0	0.974554	14.3748	-0.0728546	0	0.982289	Yes	Yes	Yes	Yes
O14578-3	CIT	3	2	1	0.988782	0.942416	1.01518	0.934704	0.900835	0.742336	0.574483	0.357887	0.202051	0.13502	0.0936512	0.0798945	0.0636511	0.0656648	0.0449768	1	1.05441	1.11427	1.03325	1.0246	0.889221	0.774906	0.625914	0.385711	0.198758	0.128661	0.132148	0.0774449	0.0610773	0.086742	0.0593918	10.2144	-0.178563	0.00447887	0.996048	10.4205	-0.186673	0.0256648	0.98988	Yes	Yes	Yes	Yes
O14578-4	CIT	20	21	1	0.990648	1.00393	0.978809	0.947737	0.897256	0.772086	0.561677	0.376735	0.206622	0.14709	0.128027	0.106576	0.0919012	0.10008	0.104087	1	1.00394	1.00688	1.00795	0.981908	0.907697	0.799211	0.597532	0.411961	0.237216	0.157819	0.125274	0.115353	0.101329	0.112222	0.112735	10.2442	-0.186548	0.058883	0.997091	10.4685	-0.185488	0.0676261	0.997732	Yes	Yes	Yes	Yes
O14579	COPE	20	14	1	0.985492	0.956858	0.965181	0.903166	0.829193	0.733511	0.602759	0.408159	0.234341	0.144793	0.0983655	0.064331	0.0544554	0.0419328	0.0313596	1	1.04884	0.94758	0.982807	0.981811	0.836899	0.795265	0.732628	0.499288	0.278303	0.180359	0.116512	0.0684413	0.046597	0.0399719	0.0385676	10.2708	-0.166191	0	0.990101	10.986	-0.172425	0	0.98689	Yes	Yes	Yes	Yes
O14593	RFXANK	2		1	1.22679	1.13479	1.15322	1.08023	0.828947	0.80979	0.601453	0.446193	0.400005	0.325263	0.235095	0.246046	0.166408	0.1307	0.18902																	10.9928	-0.129644	0.0973417	0.951015					Yes		Yes
O14602	EIF1AY	3	3	1	1.02026	1.13634	1.01959	1.07295	1.00668	0.859393	0.78307	0.714687	0.59844	0.57827	0.480992	0.436887	0.325397	0.212724	0.192636	1	0.970247	0.945524	0.97781	0.977013	0.936248	0.836895	0.706088	0.61913	0.558032	0.426771	0.322834	0.367227	0.285616	0.1422	0.0782181	14.1326	-0.0835236	0	0.969992	12.6217	-0.0984689	0	0.982226	Yes	Yes	Yes	Yes
O14613	CDC42EP2	3	1	1	1.03107	1.00978	1.0299	0.904122	0.792126	0.637748	0.55517	0.421729	0.338363	0.273785	0.232421	0.21379	0.235833	0.281221	0.152982	1	0.892336	0.979706	1.21398	1.33519	0.961598	0.841038	0.742815	0.564295	0.456737	0.389948	0.320311	0.279954	0.210884	0.219843	0.238285	10.1719	-0.122498	0.115702	0.991693	11.9584	-0.130917	0.181158	0.915781	Yes	Yes	Yes	Yes
O14617-5	AP3D1	54	42	1	1.00658	0.967055	0.940907	0.858881	0.672753	0.481878	0.269333	0.176315	0.111198	0.0824589	0.064114	0.0508084	0.044947	0.0461838	0.0468986	1	0.974714	0.970731	0.895996	0.868544	0.667224	0.466576	0.293913	0.193311	0.12476	0.0953351	0.0756342	0.059786	0.0507355	0.0530676	0.05435	8.40765	-0.193518	0	0.997581	8.4089	-0.184042	0	0.996001	Yes	Yes	Yes	Yes
O14618	CCS	7	6	1	0.984946	1.05154	0.995684	0.968543	0.937238	0.778531	0.701145	0.602268	0.505188	0.470281	0.470078	0.464773	0.3887	0.478938	0.572127	1	0.982157	1.01589	1.00054	0.953715	0.946392	0.885952	0.775839	0.643524	0.565072	0.563234	0.487717	0.538028	0.499034	0.540278	0.51293	13.7225	-0.119234	0.456097	0.970297		-0.108786	0.500379	0.989622	Yes	Yes
O14628	ZNF195		2																	1	1.0152	1.16151	1.07092	0.995095	0.884565	0.655761	0.529352	0.438315	0.27503	0.335374	0.278256	0.188944	0.204545	0.125625	0.0949713					10.4141	-0.130004	0.0691139	0.976836		Yes		Yes
O14639	ABLIM1	19	14	1	0.98944	0.958744	0.976881	0.943221	0.925938	0.794573	0.691079	0.597669	0.50677	0.452291	0.428604	0.420202	0.367729	0.435155	0.463232	1	1.02832	0.927122	0.979255	0.996397	0.927213	0.823306	0.722342	0.589592	0.491358	0.410474	0.346483	0.343621	0.328084	0.32968	0.335805	12.7889	-0.108665	0.384904	0.986662	12.2264	-0.113588	0.271744	0.991969	Yes	Yes		Yes
O14640	DVL1	4	3	1	0.974493	0.987293	0.953196	0.918764	0.730992	0.60779	0.432576	0.30879	0.249731	0.21159	0.164817	0.153217	0.150326	0.154651	0.152611	1	0.913792	0.886038	0.995454	0.824398	0.76066	0.593065	0.552805	0.345841	0.243313	0.2605	0.176065	0.210342	0.13	0.18729	0.233479	9.31061	-0.151129	0.0844497	0.997173	9.58318	-0.128979	0.0759496	0.969407	Yes	Yes	Yes	Yes
O14641	DVL2	15	14	1	0.972959	0.942042	0.930537	0.86841	0.769492	0.640243	0.411934	0.276382	0.19237	0.13605	0.103143	0.0886383	0.0812278	0.0770158	0.0825391	1	1.00074	0.95431	0.906219	0.904667	0.753489	0.640885	0.413922	0.276448	0.191022	0.142757	0.106399	0.0915578	0.0682367	0.0772526	0.0732217	9.30235	-0.159541	0	0.992422	9.31042	-0.160407	0	0.9933	Yes	Yes	Yes	Yes
O14646	CHD1	4	2	1	1.06685	1.07044	0.962574	0.948336	0.744229	0.598459	0.43153	0.284585	0.207253	0.166647	0.166417	0.190413	0.131883	0.14267	0.13567	1	0.985115	0.927522	0.911279	0.799147	0.644927	0.4709	0.28767	0.17912	0.135353	0.104949	0.0958855	0.0608703	0.0687602	0.0677311	0.0620164	9.23692	-0.168732	0.0987707	0.992649	8.23762	-0.174412	0	0.994004	Yes	Yes	Yes	Yes
O14647	CHD2	2	3	1	0.973047	1.10795	1.09516	0.890451	0.797226	0.625787	0.379507	0.317408	0.267788	0.196102	0.200808	0.173771	0.150705	0.174641	0.192527	1	0.988181	1.06848	1.03718	0.948202	0.736793	0.556572	0.340704	0.240799	0.152195	0.126604	0.0903047	0.133263	0.105224	0.129275	0.133961	9.319	-0.174078	0.142944	0.985516	8.87832	-0.204628	0.0890334	0.994503	Yes	Yes	Yes	Yes
O14653-2	GOSR2	8	7	1	1.06785	1.08755	1.05194	1.0132	0.947309	0.846549	0.685983	0.58807	0.500622	0.543858	0.460549	0.383793	0.363387	0.414328	0.42871	1	0.992295	1.02192	0.975616	0.968805	0.887607	0.77768	0.611829	0.535137	0.474962	0.387985	0.34612	0.36433	0.357507	0.390018	0.288183	12.9001	-0.110836	0.380788	0.976963	11.6385	-0.113268	0.289572	0.99355	Yes	Yes		Yes
O14656	TOR1A	13	7	1	1.01254	0.986828	0.984819	0.955124	0.849888	0.681213	0.487071	0.345161	0.23501	0.183996	0.151012	0.122257	0.105106	0.107001	0.116078	1	0.965556	0.954197	0.943112	0.879574	0.805502	0.647026	0.489942	0.338587	0.242134	0.182742	0.13202	0.102078	0.0900685	0.0902637	0.0834881	9.85754	-0.164329	0.0585993	0.999143	9.69544	-0.14612	0	0.994759	Yes	Yes	Yes	Yes
O14657	TOR1B	6	11	1	1.21494	0.953907	0.984515	0.93863	0.870768	0.666846	0.464351	0.321569	0.208328	0.135419	0.125241	0.0663736	0.0713349	0.051538	0.0250616	1	1.11852	1.00885	0.995208	0.969532	0.863004	0.681249	0.512915	0.374799	0.26131	0.186705	0.142142	0.106358	0.0766652	0.0814123	0.0718366	9.76919	-0.170957	0	0.981662	10.0668	-0.151344	0	0.993969	Yes	Yes	Yes	Yes
O14662	STX16	7	5	1	1.05863	1.10704	1.05159	1.05925	1.00425	0.859936	0.726335	0.589567	0.509615	0.474916	0.401554	0.393792	0.357413	0.343748	0.358972	1	0.947659	1.09529	1.15619	1.09148	1.06474	0.778709	0.73369	0.618252	0.483772	0.352998	0.307057	0.277136	0.229168	0.184264	0.144084	12.5495	-0.119218	0.332048	0.981813	12.1922	-0.116177	0.0747293	0.966835	Yes	Yes		Yes
O14668	PRRG1	1	2	1	1.02945	1.24472	1.21532	0.984425	1.10446	0.819389	0.827276	0.64012	0.714774	0.585189	0.551525	0.645055	0.311323	0.562808	0.512769	1	1.0568	1.02724	0.99657	1.05048	0.766346	0.84953	0.59772	0.541797	0.428142	0.355128	0.311221	0.35534	0.327585	0.299201	0.375386	19.8845	-0.0817686	0.467617	0.820785	11.3494	-0.121829	0.281944	0.968097	Yes	Yes		Yes
O14672	ADAM10	23	20	1	0.980012	1.00278	0.974799	0.90538	0.859017	0.775796	0.665895	0.578018	0.50393	0.480903	0.450781	0.443469	0.392164	0.453359	0.514991	1	0.93931	0.937576	0.948957	0.847486	0.787548	0.687938	0.585472	0.495974	0.42053	0.38165	0.349982	0.360494	0.334207	0.369232	0.360213	13.4654	-0.0959787	0.401106	0.980259	11.1629	-0.0967546	0.234432	0.983636	Yes	Yes		Yes
O14678	ABCD4	1		1	0.992381	1.0012	0.903768	0.920266	0.776494	0.643429	0.543772	0.453687	0.450947	0.329211	0.354661	0.439847	0.434461	0.422628	0.526763																	10.4399	-0.144653	0.407228	0.958492					Yes
O14681	EI24	1	3	1	1.00468	0.988529	1.00469	0.83206	0.77967	0.581096	0.376056	0.266826	0.150326	0.0980643	0.0728451	0.0468344	0.03171	0.0206045	0.0278288	1	1.02179	0.974958	0.855975	0.924778	0.807856	0.585878	0.451448	0.344968	0.203661	0.175313	0.109884	0.0791044	0.0676347	0.0668167	0.049378	9.06608	-0.181218	0	0.994212	9.47481	-0.156346	0	0.989745	Yes	Yes	Yes	Yes
O14682	ENC1		1																	1	0.930282	0.64913	1.03778	0.704532	0.843695	0.509218	0.363389	0.294659	0.105774	0.141812	0.198062	0.115871	0.141528	0.143376	0					8.88884	-0.150183	0	0.894408		Yes		Yes
O14683	TP53I11	3	4	1	0.943634	0.940359	0.917808	0.919461	0.854984	0.664147	0.501389	0.358946	0.239839	0.161292	0.124324	0.110551	0.0852551	0.088197	0.0931822	1	1.07202	0.921167	0.913122	0.979707	0.917286	0.679358	0.49611	0.381711	0.234146	0.187674	0.133221	0.0943192	0.0731419	0.045693	0.0432951	9.88247	-0.153737	0.00946182	0.992121	10.0743	-0.161132	0	0.990824	Yes	Yes	Yes	Yes
O14684	PTGES	2	2	1	0.910429	0.943975	0.955474	0.926148	0.840612	0.64169	0.509531	0.396849	0.328193	0.351945	0.301417	0.27866	0.221044	0.251417	0.284492	1	0.969032	0.991532	0.951181	0.953766	0.822048	0.684631	0.579791	0.42322	0.36694	0.316961	0.336683	0.254282	0.220317	0.233759	0.259073	10.0283	-0.141477	0.226435	0.986417	10.5307	-0.12188	0.171875	0.994017	Yes	Yes	Yes	Yes
O14686-3	KMT2D	6	10	1	1.0345	1.00275	1.00087	0.97647	0.846678	0.774267	0.603011	0.50079	0.389108	0.32859	0.2653	0.228594	0.19932	0.161648	0.223461	1	0.998374	0.982541	1.0061	0.917638	0.891708	0.728391	0.599578	0.570638	0.417677	0.324888	0.311945	0.229259	0.209106	0.211224	0.214277	11.0691	-0.117824	0.0912905	0.995469	11.3423	-0.104278	0.0501656	0.993235	Yes	Yes	Yes	Yes
O14713	ITGB1BP1	1	2	1	0.931192	0.991193	0.815186	0.830463	0.737363	0.651974	0.485179	0.32265	0.20833	0.169227	0.131147	0.11561	0.102615	0.106893	0.12837	1	0.960956	0.932245	0.89805	0.798847	0.799111	0.573257	0.452931	0.352283	0.156714	0.197379	0.12388	0.0971345	0.104273	0.108353	0.092451	9.36086	-0.137923	0	0.97331	9.26544	-0.143369	0	0.981334	Yes	Yes	Yes	Yes
O14715	RGPD8	1	1	1	1.11815	0.9268	0.939303	0.962493	0.84478	0.49995	0.364772	0.196274	0.133876	0.124789	0.11373	0	0	0.000134316	9.17369e-05	1	1.13917	0.995165	0.877003	0.859489	0.787151	0.58691	0.563335	0.227337	0.180325	0.118201	0.0740406	0.104101	0.0885518	0	0	9.03251	-0.20686	0	0.987055	9.40565	-0.167886	0	0.971631	Yes	Yes	Yes	Yes
O14717	TRDMT1	2	3	1	1.14264	1.01493	0.973318	0.943519	0.809386	0.621449	0.400023	0.281073	0.284566	0.183586	0.14753	0.127357	0.0968203	0.0950675	0.112491	1	1.03416	0.963815	0.979045	0.832099	0.771889	0.618387	0.44064	0.304758	0.235966	0.172117	0.116282	0.112673	0.0993572	0.104248	0.0720308	9.44107	-0.165317	0.0615588	0.988926	9.36406	-0.146044	0	0.994568	Yes	Yes	Yes	Yes
O14727	APAF1	11	10	1	1.00881	0.999028	0.968845	0.949663	0.801617	0.653643	0.420714	0.26836	0.192821	0.141055	0.0980824	0.0862242	0.0790399	0.0703812	0.0662159	1	0.994731	1.00623	0.986868	0.878018	0.741281	0.602174	0.402888	0.27508	0.183664	0.126233	0.101006	0.0892962	0.0653471	0.0743998	0.0639121	9.45984	-0.176909	0.0224979	0.998624	9.15794	-0.162647	0	0.997736	Yes	Yes	Yes	Yes
O14730	RIOK3	9	8	1	0.924968	0.973684	0.917255	0.883492	0.800104	0.575853	0.413649	0.287345	0.242238	0.147195	0.127139	0.111735	0.0951134	0.0763247	0.0571526	1	1.13039	1.06273	1.09156	0.938455	0.811184	0.66222	0.463058	0.317384	0.22827	0.189469	0.152957	0.12163	0.111583	0.0850369	0.0571924	9.30121	-0.153061	0	0.993238	9.71358	-0.156748	0.0241468	0.987681	Yes	Yes	Yes	Yes
O14732	IMPA2	5	4	1	1.04117	1.02502	1.05609	1.04878	0.955155	0.831966	0.760089	0.695677	0.604944	0.56148	0.634752	0.588308	0.56591	0.626535	0.741689	1	1.02017	1.06488	1.08946	0.964042	0.987883	0.799796	0.776456	0.633061	0.544509	0.500886	0.466036	0.473315	0.431387	0.471038	0.453647		-0.110253	0.615779	0.93728	14.1754	-0.102265	0.4215	0.977853	Yes	Yes
O14733-2	MAP2K7		11																	1	0.955966	0.964635	0.939841	0.871794	0.723894	0.557756	0.3769	0.240034	0.163344	0.122691	0.0898143	0.0810573	0.0616053	0.0749535	0.0716469					8.91023	-0.166955	0	0.995859		Yes		Yes
O14733-4	MAP2K7	10		1	0.981855	0.97648	0.968407	0.890171	0.746398	0.588234	0.376672	0.253898	0.176768	0.134912	0.0996674	0.0845742	0.076722	0.08255	0.09083																	9.06386	-0.169936	0.0191367	0.997431					Yes		Yes
O14734	ACOT8	6	4	1	0.950389	1.00563	0.946758	0.913016	0.805874	0.681636	0.451092	0.353067	0.283693	0.222409	0.189335	0.182626	0.156334	0.179703	0.185418	1	0.937598	0.959068	0.949451	0.862908	0.774548	0.627331	0.436821	0.335921	0.264837	0.21232	0.158988	0.136725	0.128378	0.129002	0.155257	9.73307	-0.15222	0.118653	0.994125	9.48543	-0.139356	0.0380851	0.99273	Yes	Yes	Yes	Yes
O14735	CDIPT	4	3	1	0.932637	0.930568	0.876443	0.845336	0.810655	0.540549	0.36655	0.227634	0.143993	0.0973348	0.0678671	0.0503968	0.0451688	0.0444515	0.0271423	1	1.0341	0.943048	0.879584	0.92685	0.777537	0.623743	0.41654	0.304578	0.209547	0.153123	0.119503	0.0999464	0.0871863	0.093508	0.0919415	8.97886	-0.18498	0	0.985751	9.38264	-0.158191	0.0155392	0.991265	Yes	Yes	Yes	Yes
O14737	PDCD5	13	10	1	0.965454	0.932849	0.932379	0.982865	0.930384	0.813011	0.770901	0.70347	0.636367	0.624971	0.664325	0.761096	0.654272	0.849437	1.12733	1	0.980446	0.918514	0.886735	0.925661	0.848338	0.881145	0.841969	0.701364	0.622016	0.606336	0.608485	0.612353	0.614921	0.798684	1.00057		-0.127253	0.754307	0.402393		-0.0652056	0.693496	0.474803	Yes	Yes
O14744	PRMT5	54	49	1	0.973028	0.993601	0.990963	0.982709	0.945406	0.836582	0.769354	0.657366	0.603643	0.598367	0.579919	0.609988	0.545148	0.67509	0.822551	1	1.02946	0.993365	1.00338	0.980584	0.943063	0.881729	0.777514	0.684652	0.64294	0.59369	0.573712	0.620168	0.601059	0.752767	0.812505		-0.116764	0.631722	0.877237		-0.118744	0.655423	0.876126	Yes	Yes
O14745	SLC9A3R1	33	26	1	0.996667	1.00449	0.962876	1.00537	0.962543	0.868631	0.845208	0.758997	0.741976	0.725743	0.731763	0.773185	0.685513	0.885732	1.15521	1	1.00326	0.997225	1.02015	1.02759	0.969897	0.861997	0.821658	0.736069	0.644677	0.645932	0.595827	0.662228	0.652109	0.821152	0.902297		-0.0949293	0.810032	0.408785		-0.104107	0.706461	0.78298	Yes	Yes
O14757	CHEK1	21	23	1	0.999077	0.9854	0.992053	0.989837	0.92074	0.797148	0.6752	0.502693	0.315188	0.174504	0.0991654	0.0589704	0.0540057	0.0447945	0.0370326	1	0.94939	0.973428	0.954842	0.939834	0.912683	0.784033	0.623686	0.464342	0.299054	0.183393	0.0977765	0.0571844	0.0415245	0.0327997	0.0236677	10.9524	-0.172294	0	0.995805	10.7111	-0.170408	0	0.993505	Yes	Yes	Yes	Yes
O14763	TNFRSF10B	8	6	1	0.982052	1.02175	1.01477	0.954882	0.910066	0.812616	0.78982	0.703794	0.625376	0.637252	0.649963	0.646104	0.570088	0.691734	0.795981	1	1.02282	1.09882	1.04962	1.02503	0.965245	0.898698	0.76771	0.694483	0.659302	0.606212	0.59633	0.569919	0.537247	0.690929	0.695127		-0.0850301	0.654855	0.901468		-0.110288	0.614299	0.938278	Yes	Yes
O14770	MEIS2		1																	1	1.06448	1.13754	1.02867	1.07254	0.88526	0.862929	0.737248	0.659918	0.556914	0.397363	0.431648	0.375728	0.195135	0.307091	0.314091					12.9013	-0.0976948	0.173314	0.961925		Yes		Yes
O14772	FPGT	10	11	1	1.09522	1.02489	0.998152	0.967036	0.819964	0.661103	0.403604	0.276268	0.175029	0.120703	0.0887977	0.0554153	0.056191	0.0567806	0.041816	1	0.973569	0.993514	0.999507	0.901824	0.806822	0.638594	0.463473	0.322067	0.206323	0.143791	0.116651	0.0874727	0.074724	0.0699147	0.0768779	9.48634	-0.185334	0.00743961	0.995673	9.58187	-0.158602	0	0.997799	Yes	Yes	Yes	Yes
O14773	TPP1	10	14	1	0.952449	1.04052	1.00418	0.9121	0.83236	0.723283	0.518287	0.385804	0.273612	0.194508	0.157071	0.132272	0.115202	0.0875503	0.0818983	1	1.00284	0.929515	1.01557	0.972783	0.882967	0.685606	0.557511	0.406586	0.301814	0.223236	0.167548	0.135873	0.116218	0.109083	0.0912417	10.1424	-0.141881	0	0.996224	10.3317	-0.141591	0.0181015	0.996763	Yes	Yes	Yes	Yes
O14775	GNB5	1		1	1.05465	0.99343	0.95626	1.00027	0.871883	0.810638	0.64276	0.500961	0.370898	0.319406	0.259066	0.206169	0.196189	0.166848	0.128521																	11.2507	-0.121066	0.0483855	0.995821					Yes		Yes
O14776	TCERG1	55	52	1	0.999264	0.994276	0.993202	1.00492	0.933877	0.848213	0.736362	0.609728	0.454777	0.323576	0.187373	0.109306	0.0928863	0.0914477	0.0941375	1	1.014	1.01491	0.994841	0.982747	0.943404	0.8189	0.705165	0.573435	0.438846	0.312645	0.20546	0.125146	0.0961252	0.0933611	0.100071	11.823	-0.141659	0	0.99463	11.6181	-0.135504	0	0.995836	Yes	Yes	Yes	Yes
O14777	NDC80	21	16	1	0.990232	0.954346	0.941724	0.911708	0.794541	0.63301	0.417228	0.278022	0.180882	0.120276	0.0865672	0.0678277	0.0554383	0.052472	0.0555884	1	1.00577	0.989405	0.977309	0.920881	0.820608	0.708265	0.480455	0.302292	0.213412	0.153514	0.112186	0.091076	0.0645028	0.0664243	0.0633609	9.37677	-0.172993	0	0.996463	9.78867	-0.164185	0	0.997352	Yes	Yes	Yes	Yes
O14782	KIF3C	4		1	1.06371	0.984989	0.940665	0.928827	0.78908	0.62434	0.339152	0.196918	0.108934	0.0739953	0.0574542	0.0413265	0.0410362	0.0428332	0.0462195																	9.1099	-0.210479	0.00625197	0.994881					Yes		Yes
O14787	TNPO2	22	22	1	1.05458	1.12331	1.11172	1.1007	1.05632	0.912459	0.696207	0.550883	0.399837	0.300003	0.246839	0.182499	0.156721	0.130275	0.125358	1	1.0544	1.0737	1.04608	1.05017	0.971703	0.869489	0.704608	0.514992	0.396923	0.298132	0.228966	0.180253	0.149836	0.105685	0.0727242	11.5977	-0.155729	0.0984357	0.979864	11.5414	-0.139775	0.0288657	0.993619	Yes	Yes	Yes	Yes
O14792	HS3ST1	2	2	1	0.964998	1.00586	0.999473	0.856569	0.825326	0.631857	0.417026	0.324318	0.186572	0.158919	0.116252	0.0899817	0.0850356	0.0586362	0.0178937	1	0.971746	0.958573	0.943131	0.907964	0.691818	0.599835	0.422559	0.285773	0.17455	0.146236	0.107193	0.0409488	0.0374725	0.0423003	0.0493441	9.47579	-0.161719	0	0.994971	9.10872	-0.1647	0	0.992762	Yes	Yes	Yes	Yes
O14795	UNC13B	14	9	1	1.02637	1.02549	1.00584	0.961983	0.84955	0.636944	0.42767	0.287437	0.197764	0.151213	0.120711	0.0980517	0.0819294	0.0834384	0.0728877	1	1.06359	0.958578	0.997374	0.882565	0.743623	0.597219	0.416979	0.271467	0.178741	0.12486	0.101821	0.0731053	0.0666924	0.0526538	0.0508973	9.53016	-0.183134	0.045939	0.999388	9.17382	-0.16586	0	0.995565	Yes	Yes	Yes	Yes
O14802	POLR3A	29	36	1	0.985152	0.983311	0.977754	0.914366	0.798588	0.640008	0.438158	0.272065	0.186463	0.137099	0.103925	0.0760631	0.0675422	0.0563816	0.0457368	1	1.01988	1.00777	1.00123	0.924948	0.79996	0.634887	0.451627	0.297969	0.203878	0.15044	0.114319	0.0851593	0.0735258	0.0677814	0.0695027	9.45094	-0.169281	0	0.998455	9.52949	-0.161632	0.000237941	0.998974	Yes	Yes	Yes	Yes
O14807	MRAS		1																	1	1.07084	1.12447	1.00998	0.744063	0.763803	0.699155	0.563909	0.536911	0.51614	0.466526	0.513241	0.288563	0.33143	1.27409	0.493862						-0.126669	0.550057	0.482133		Yes
O14810	CPLX1	4		1	0.99477	0.976715	1.00432	0.992029	0.950788	0.804307	0.705915	0.610623	0.548263	0.512005	0.532086	0.539555	0.434938	0.533758	0.72541																		-0.132957	0.541575	0.9279					Yes
O14817	TSPAN4	6	3	1	1.06373	1.12797	1.11607	1.05434	1.1197	0.958179	0.884844	0.804077	0.832574	0.810544	0.817002	0.746503	0.714189	0.902092	1.13979	1	0.992614	1.07842	1.05278	1.00793	0.968589	0.935388	0.865454	0.737408	0.728784	0.584963	0.602125	0.606353	0.63197	0.767481	0.86298		-0.0986639	0.84707	0.469484		-0.118189	0.680274	0.828082	Yes	Yes
O14818	PSMA7	45	41	1	1.00363	1.00563	0.996881	1.04146	0.957614	0.876798	0.810503	0.699139	0.65518	0.620195	0.599973	0.641041	0.555079	0.697591	0.892861	1	1.02489	1.01332	0.975469	1.01221	0.945289	0.868774	0.789243	0.691134	0.624576	0.575881	0.550983	0.613472	0.601743	0.756356	0.84501		-0.109136	0.664279	0.827862		-0.117045	0.653021	0.838425	Yes	Yes
O14828	SCAMP3	10	10	1	0.993225	0.949378	0.987681	0.891586	0.823526	0.650702	0.546561	0.409683	0.31113	0.237559	0.207012	0.174934	0.146138	0.125799	0.125149	1	1.02266	0.922631	0.97228	0.942104	0.864408	0.708121	0.565856	0.403395	0.311457	0.237419	0.190306	0.145623	0.11354	0.101793	0.09453	10.1725	-0.123183	0	0.996886	10.4035	-0.133891	0	0.996124	Yes	Yes	Yes	Yes
O14832	PHYH	2	5	1	1.06871	0.986321	1.07788	1.00829	0.87918	0.839284	0.83957	0.718116	0.674018	0.579619	0.563694	0.567453	0.519963	0.462906	0.41198	1	1.05333	0.952859	1.01375	0.928159	0.949309	0.887633	0.801753	0.727765	0.668616	0.576994	0.54579	0.475911	0.508759	0.504072	0.3626	17.4527	-0.0549583	0.151385	0.971854	16.6069	-0.0592512	0.155957	0.979625	Yes	Yes	Yes	Yes
O14841	OPLAH	7	9	1	1.01987	1.01751	1.0132	0.993749	0.909066	0.832834	0.74277	0.611876	0.471605	0.346075	0.222851	0.156133	0.123935	0.0781974	0.096566	1	1.07574	1.08843	1.10985	1.01455	0.959093	0.914228	0.771865	0.636255	0.517782	0.4104	0.315932	0.210143	0.137959	0.113074	0.100668	11.9237	-0.131065	0	0.994301	12.5096	-0.122876	0	0.986113	Yes	Yes	Yes	Yes
O14867	BACH1	7	2	1	1.07931	1.11103	1.0967	0.983205	0.969232	0.864219	0.723883	0.611021	0.502608	0.538727	0.48078	0.433909	0.458934	0.423005	0.463351	1	1.03031	1.07386	1.03214	0.956518	0.849905	0.8396	0.700174	0.624207	0.534081	0.539937	0.479322	0.464246	0.421984	0.506472	0.400919	13.5375	-0.117766	0.433899	0.970128	14.5952	-0.0809369	0.36171	0.979442	Yes	Yes
O14874	BCKDK	3	5	1	0.972625	0.947108	0.891388	0.791283	0.700796	0.503835	0.26548	0.190069	0.113876	0.0790444	0.0612427	0.0599294	0.0424095	0.0479029	0.0633061	1	1.02502	1.04217	0.951629	0.934085	0.781214	0.534011	0.324744	0.230496	0.152994	0.107499	0.0771778	0.0635195	0.0560097	0.0632149	0.0545121	8.38671	-0.184406	0	0.988956	8.92729	-0.197556	0.0250716	0.998075	Yes	Yes	Yes	Yes
O14879	IFIT3		2																	1	1.06408	0.949626	1.05901	0.907114	0.899392	1.31139	1.00617	0.82925	0.483204	0.568181	0.346908	0.172747	0.145378	0.0965265	0.131728					13.3577	-0.166571	0.0747555	0.925549		Yes		Yes
O14880	MGST3	3	4	1	1.00339	0.892744	0.916862	0.852932	0.828965	0.632485	0.502674	0.355491	0.254835	0.201173	0.152797	0.102558	0.0802765	0.0598853	0.0588001	1	0.964974	1.01655	0.934761	0.905463	0.870126	0.744654	0.578685	0.479389	0.357469	0.232576	0.217001	0.177827	0.139154	0.0970103	0.115062	9.75016	-0.144548	0	0.986798	10.7203	-0.125004	0	0.993752	Yes	Yes	Yes	Yes
O14893	GEMIN2	8	7	1	1.06299	1.10807	1.09668	1.10929	1.11832	1.01642	1.00251	0.917816	0.881936	0.79367	0.782883	0.858697	0.687534	0.761539	0.774769	1	0.92482	0.991343	1.012	1.10429	0.95726	0.869099	0.797949	0.692531	0.564	0.542267	0.503102	0.523498	0.490877	0.50663	0.40132		-0.0582741	0.760202	0.792694	15.6961	-0.0924738	0.434067	0.969185	Yes	Yes
O14896	IRF6	10	11	1	1.00176	1.00996	0.979754	0.982017	0.935164	0.811007	0.668628	0.504676	0.31202	0.212152	0.169609	0.138056	0.115543	0.124102	0.107405	1	1.00817	1.04607	1.10136	0.983042	0.940818	0.821114	0.676221	0.506604	0.330728	0.218413	0.144728	0.0980702	0.0762407	0.0700143	0.0619296	11.0062	-0.158451	0.0537532	0.997729	11.0999	-0.157982	0	0.994079	Yes	Yes	Yes	Yes
O14907	TAX1BP3	9	8	1	0.999556	1.00938	1.02733	1.08802	0.970899	0.878596	0.808608	0.683561	0.610603	0.621024	0.572758	0.52171	0.440341	0.459922	0.422907	1	0.990142	1.06308	0.966092	1.04212	1.01233	0.868632	0.770866	0.597095	0.521004	0.443979	0.444788	0.448174	0.418081	0.437645	0.328084	16.3539	-0.073677	0.363595	0.979193	12.841	-0.124153	0.382814	0.985083	Yes	Yes
O14908	GIPC1	18	12	1	1.00355	0.982974	0.997086	0.971034	0.897079	0.751267	0.568139	0.386285	0.25681	0.166201	0.104532	0.0712341	0.0632914	0.0532539	0.0426542	1	0.977766	0.967305	0.959011	0.986131	0.902623	0.74904	0.566907	0.406987	0.277399	0.20963	0.186692	0.126959	0.090373	0.124165	0.134686	10.3396	-0.168582	0	0.999162	10.4017	-0.16017	0.0674371	0.996849	Yes	Yes	Yes	Yes
O14910	LIN7A	5		1	0.968664	0.974728	0.951086	1.01202	0.943989	0.813948	0.802459	0.70476	0.641	0.608037	0.599974	0.658481	0.57849	0.700947	0.816566																		-0.0974961	0.657132	0.86529					Yes
O14920	IKBKB	11	13	1	1.04839	0.966033	1.04058	0.945136	0.846034	0.690468	0.442082	0.368382	0.213211	0.160731	0.108404	0.0853741	0.0908297	0.0825495	0.0854795	1	1.00681	0.9826	0.94759	0.928791	0.832543	0.61468	0.457238	0.319544	0.216253	0.153105	0.127174	0.102984	0.08031	0.0881934	0.0740745	9.79852	-0.167451	0.0258149	0.995492	9.57844	-0.160353	0.0151222	0.998221	Yes	Yes	Yes	Yes
O14924	RGS12	2	1	1	0.991891	1.01543	0.915437	0.858342	0.703146	0.544063	0.315463	0.232037	0.135261	0.0810674	0.0764125	0.0529769	0.0496655	0.0484993	0.0226844	1	0.976927	0.820886	0.903013	0.831276	0.706697	0.5178	0.363492	0.242442	0.175491	0.120186	0.0836272	0.0660984	0.054478	0.0644159	0.0315132	8.69437	-0.18169	0	0.995237	8.69337	-0.1665	0	0.979814	Yes	Yes	Yes	Yes
O14925	TIMM23	7	6	1	0.959788	0.909868	0.917071	0.87455	0.727375	0.572455	0.385252	0.252141	0.166018	0.113483	0.0835354	0.0685729	0.0638103	0.057245	0.0516904	1	1.00885	0.941772	0.874801	0.903848	0.790261	0.554652	0.376632	0.284298	0.165198	0.104307	0.0798491	0.0541244	0.0521303	0.0347803	0.053684	8.96757	-0.168954	0	0.991442	9.10164	-0.176368	0	0.991221	Yes	Yes	Yes	Yes
O14929	HAT1	21	20	1	0.971445	0.9406	0.913234	0.901998	0.796285	0.659456	0.445387	0.325323	0.23971	0.181298	0.14357	0.126158	0.109885	0.0947082	0.0629762	1	0.99203	0.975264	0.990778	0.922112	0.777	0.628187	0.452644	0.334963	0.242079	0.166663	0.122312	0.12267	0.0953166	0.0854437	0.0492064	9.62726	-0.145662	0	0.993782	9.56766	-0.149541	0	0.998931	Yes	Yes	Yes	Yes
O14933	UBE2L6	2	7	1	0.95823	0.963471	0.90764	0.856817	0.848042	0.830218	0.648841	0.514428	0.452342	0.310682	0.290605	0.211104	0.0874118	0.0938191	0.000130528	1	1.07749	1.0245	1.09537	0.971663	0.961355	0.91706	0.788921	0.646219	0.46163	0.443163	0.328643	0.293346	0.234674	0.23336	0.164296	11.3682	-0.12287	0	0.971243	12.6052	-0.115433	0.108973	0.988379	Yes	Yes	Yes	Yes
O14936	CASK	31	28	1	1.01567	1.00296	1.0114	1.01799	0.97513	0.880094	0.809429	0.707502	0.673068	0.623275	0.544991	0.499181	0.413832	0.289648	0.105754	1	0.993792	1.02675	0.993904	1.00393	0.992063	0.87543	0.769604	0.694041	0.628541	0.54949	0.476193	0.491564	0.432971	0.289996	0.107731	14.9058	-0.0777544	0	0.965445	14.3948	-0.0776021	0	0.968524	Yes	Yes	Yes	Yes
O14939	PLD2	7	6	1	1.04498	1.01759	0.941755	0.916987	0.820178	0.654531	0.421895	0.295675	0.235904	0.176592	0.145969	0.117039	0.102595	0.099105	0.0834125	1	1.05698	1.003	0.976116	0.928863	0.796217	0.622027	0.417058	0.275533	0.168739	0.122611	0.0880751	0.0720173	0.0510639	0.0573641	0.0702134	9.54939	-0.162553	0.0410951	0.996576	9.36203	-0.175037	0.00245304	0.99742	Yes	Yes	Yes	Yes
O14944	EREG	6	7	1	1.01841	0.988906	0.93437	0.969259	0.905068	0.789448	0.740844	0.674466	0.588679	0.559433	0.507838	0.549495	0.479672	0.633707	0.802004	1	0.990206	0.953142	0.892097	0.901617	0.928942	0.819426	0.728157	0.627743	0.562055	0.482356	0.466018	0.544527	0.467401	0.620405	0.66548		-0.102912	0.583961	0.853277		-0.117055	0.534677	0.887571	Yes	Yes
O14949	UQCRQ	7	6	1	0.961462	0.902388	0.880237	0.865735	0.760363	0.559259	0.359149	0.241242	0.149323	0.0984427	0.0735948	0.0535565	0.0443557	0.0549905	0.0434393	1	0.983713	0.876448	0.87558	0.899099	0.727394	0.54838	0.362158	0.232353	0.164194	0.10181	0.0646235	0.0455458	0.0548108	0.0286423	0.0273105	8.93211	-0.178522	0	0.987579	8.87852	-0.179865	0	0.986431	Yes	Yes	Yes	Yes
O14950	MYL12B	64	53	1	1.01823	1.00162	1.00826	1.02503	0.976785	0.896207	0.829704	0.706249	0.641382	0.622913	0.550042	0.482917	0.393882	0.321717	0.344646	1	0.981078	1.01191	0.980215	0.981772	0.992735	0.847472	0.723235	0.633764	0.579868	0.489491	0.454858	0.466037	0.394393	0.293261	0.202537	15.3872	-0.0679785	0.0384154	0.989076	13.8653	-0.0753962	0	0.983987	Yes	Yes	Yes	Yes
O14964	HGS	42	37	1	0.973043	0.961487	0.963597	0.967335	0.899963	0.840299	0.773443	0.686711	0.613479	0.560219	0.470373	0.404498	0.324532	0.168458	0.0609598	1	0.995648	0.970298	0.971442	0.950927	0.923423	0.856659	0.797359	0.699921	0.628231	0.556441	0.4964	0.43678	0.356285	0.173207	0.054448	13.6699	-0.089562	0	0.963925	13.9615	-0.0887177	0	0.961255	Yes	Yes	Yes	Yes
O14965	AURKA	12	10	1	0.988895	0.999538	1.02833	0.966583	0.846909	0.703083	0.488674	0.375458	0.26587	0.212055	0.20288	0.175887	0.184463	0.190364	0.245702	1	1.05137	1.02038	1.02254	0.939572	0.823401	0.630839	0.468574	0.316181	0.230598	0.181083	0.14298	0.133502	0.11034	0.123093	0.14298	9.88626	-0.174523	0.167299	0.995207	9.59381	-0.167589	0.0778178	0.997013	Yes	Yes	Yes	Yes
O14966	RAB7L1	3	3	1	1.0159	1.03296	1.03227	0.981561	0.927097	0.684094	0.449019	0.30917	0.247617	0.190833	0.150638	0.125921	0.102618	0.109013	0.137897	1	0.990325	0.919932	0.908044	0.901892	0.8125	0.639324	0.438467	0.285373	0.189187	0.148755	0.101809	0.0733652	0.0508093	0.0943086	0.0786529	9.77856	-0.197312	0.104513	0.997597	9.46996	-0.165783	0.00491205	0.991098	Yes	Yes	Yes	Yes
O14967	CLGN	8	4	1	1.10845	1.03955	1.07282	1.00306	0.936363	0.831671	0.688528	0.559129	0.451542	0.396005	0.337655	0.291725	0.229419	0.199902	0.185633	1	0.926332	0.941337	0.918404	0.99397	0.830752	0.934574	0.781633	0.68324	0.455953	0.467482	0.345526	0.24156	0.148705	0.181919	0.203361	12.0191	-0.108066	0.0870127	0.98851	12.6692	-0.109339	0.0256753	0.966668	Yes	Yes	Yes	Yes
O14972	DSCR3	8	9	1	1.08296	1.04986	1.0715	1.04562	0.950557	0.805197	0.575294	0.462473	0.326822	0.25339	0.195825	0.147379	0.123883	0.106653	0.0604791	1	1.04364	1.04609	1.10084	1.02879	0.895857	0.788689	0.617711	0.491034	0.389142	0.254781	0.210162	0.142252	0.107039	0.116808	0.110536	10.8464	-0.148361	0.0339426	0.991468	11.0523	-0.133041	0.00601307	0.991036	Yes	Yes	Yes	Yes
O14974	PPP1R12A	39	30	1	1.00107	0.980106	0.97064	0.982427	0.941694	0.793526	0.599757	0.416269	0.260141	0.17989	0.118731	0.086171	0.07399	0.0663908	0.0664511	1	0.987157	0.987649	1.00696	1.00455	0.95287	0.81791	0.623936	0.425351	0.283505	0.194752	0.142302	0.0940637	0.0704328	0.0635175	0.0581623	10.5765	-0.173582	0.0180717	0.999072	10.7435	-0.170736	0.0160116	0.999656	Yes	Yes	Yes	Yes
O14975	SLC27A2	15	12	1	1.00374	1.00078	0.988141	0.905519	0.762304	0.605913	0.390074	0.25547	0.154451	0.10754	0.0837771	0.0654891	0.061289	0.0558845	0.038908	1	0.933062	0.946741	0.901299	0.834098	0.699652	0.533966	0.351876	0.230587	0.139476	0.0915133	0.0728569	0.0579393	0.0421498	0.0466358	0.0482918	9.16985	-0.177219	0	0.998409	8.67139	-0.175102	0	0.990343	Yes	Yes	Yes	Yes
O14976	GAK	32	27	1	1.03882	1.04765	1.03405	0.975474	0.850488	0.663344	0.435059	0.288056	0.196111	0.135728	0.0949841	0.0683745	0.056897	0.0479279	0.0401802	1	1.04896	1.04853	1.05521	1.00369	0.858262	0.68263	0.494008	0.334764	0.246162	0.172911	0.128615	0.0968051	0.0656031	0.0601597	0.0497646	9.63344	-0.181288	0.00675491	0.998002	9.95063	-0.162481	0.00244649	0.996275	Yes	Yes	Yes	Yes
O14977	AZIN1		1																	1	0.985292	1.04726	1.0517	1.22484	1.04743	0.74546	0.929902	0.65433	0.592296	0.551926	0.519587	0.523615	0.581466	0.620809	0.638703						-0.107481	0.560366	0.84973		Yes
O14979	HNRNPDL	22	32	1	1.002	0.947114	0.944713	0.989732	0.897566	0.790217	0.74389	0.653382	0.603649	0.596217	0.60993	0.658607	0.545622	0.599193	0.507401	1	1.00231	1.01532	0.981971	1.00856	0.915007	0.848135	0.72248	0.62365	0.545325	0.490766	0.441414	0.512943	0.47825	0.474898	0.34228		-0.0754921	0.54083	0.962301	14.0571	-0.0927653	0.384363	0.98333	Yes	Yes
O14980	XPO1	87	105	1	0.980988	0.971189	0.947374	0.934628	0.816942	0.6349	0.405828	0.265319	0.163683	0.11304	0.0799781	0.0557267	0.0483529	0.0432291	0.0358893	1	1.003	0.988232	0.95002	0.943051	0.815581	0.640926	0.449964	0.299154	0.204162	0.150096	0.112782	0.0891378	0.0723311	0.0720837	0.0682095	9.39152	-0.18407	0	0.997954	9.56652	-0.165546	0.00902883	0.998665	Yes	Yes	Yes	Yes
O14981	BTAF1	42	29	1	0.996377	0.973147	0.989223	0.915442	0.772982	0.587137	0.360614	0.234814	0.149513	0.110104	0.0859845	0.074911	0.0685946	0.0781897	0.0527484	1	1.02078	1.00945	0.974709	0.903433	0.804658	0.5935	0.410057	0.271311	0.183165	0.144142	0.106099	0.0834404	0.0948661	0.070827	0.0626239	9.07364	-0.187523	0.0211438	0.998561	9.28955	-0.170402	0.0170444	0.998691	Yes	Yes	Yes	Yes
O15013	ARHGEF10	28	22	1	0.986942	0.977281	0.975662	0.91326	0.833839	0.675672	0.484525	0.339756	0.219918	0.15608	0.119937	0.101885	0.100705	0.0836104	0.0671213	1	0.987448	0.996042	0.982978	0.941156	0.823354	0.688914	0.493787	0.350429	0.234182	0.181624	0.124638	0.0908803	0.069487	0.0724139	0.0836864	9.79827	-0.156847	0.00580245	0.997884	9.88981	-0.154678	0	0.998465	Yes	Yes	Yes	Yes
O15014	ZNF609	15	10	1	1.01597	0.987883	0.960365	0.93851	0.835699	0.712066	0.556089	0.4542	0.378622	0.320374	0.285511	0.283244	0.243701	0.255925	0.271941	1	0.973407	0.993383	1.01947	0.973647	0.878207	0.718104	0.558618	0.417975	0.317288	0.269156	0.207859	0.200252	0.176597	0.178225	0.161416	10.5835	-0.124683	0.195118	0.997275	10.4089	-0.143946	0.116182	0.99901	Yes	Yes	Yes	Yes
O15020	SPTBN2	17	10	1	0.997354	0.986602	1.01894	0.956846	0.865954	0.749397	0.606886	0.491932	0.360829	0.295117	0.24778	0.204755	0.159753	0.134845	0.125844	1	1.01243	0.984398	0.989198	0.957695	0.838741	0.82217	0.70952	0.593372	0.460396	0.373934	0.324958	0.24771	0.175474	0.138169	0.10271	10.9876	-0.117039	0	0.999013	11.9447	-0.107788	0	0.992256	Yes	Yes	Yes	Yes
O15031	PLXNB2	46	43	1	0.992196	0.986126	0.982736	0.958439	0.903494	0.745545	0.565854	0.406341	0.285976	0.208974	0.155209	0.111915	0.0917916	0.0723162	0.0616912	1	0.99869	1.01335	0.996583	0.961812	0.900378	0.722284	0.558389	0.418439	0.301957	0.224323	0.169485	0.125403	0.103315	0.089193	0.0746214	10.4544	-0.150197	0	0.999563	10.4592	-0.142296	0	0.999605	Yes	Yes	Yes	Yes
O15033	AREL1	3	2	1	1.04144	0.991272	0.976977	1.02172	0.883307	0.726619	0.545994	0.411221	0.286843	0.207823	0.149391	0.114058	0.0955949	0.0848655	0.0687369	1	0.917333	0.988404	0.961385	0.881581	0.726336	0.622879	0.426858	0.339465	0.205751	0.167509	0.114526	0.125115	0.0669077	0.032267	0.0459794	10.3774	-0.149818	0.00599629	0.997852	9.32159	-0.152436	0	0.991932	Yes	Yes	Yes	Yes
O15037	KHNYN	1	5	1	1.04846	1.02357	0.96594	0.974537	0.779097	0.680005	0.389876	0.270572	0.153957	0.112438	0.0749274	0.042568	0.0454492	0.0346586	0.0524335	1	0.986798	1.10587	0.997012	0.909912	0.818851	0.71523	0.473022	0.343602	0.319382	0.226285	0.135417	0.123646	0.0933754	0.126223	0.11853	9.42228	-0.187607	0	0.995262	9.97425	-0.143085	0.0244735	0.989805	Yes	Yes	Yes	Yes
O15040	TECPR2	7	8	1	1.01173	1.01529	1.01294	0.941581	0.84641	0.733682	0.576056	0.416858	0.313617	0.259493	0.206552	0.188551	0.175156	0.178362	0.208348	1	0.970138	0.984062	0.982236	0.975179	0.855838	0.741192	0.593844	0.398298	0.318241	0.281184	0.232643	0.203969	0.186368	0.195749	0.226074	10.4016	-0.142342	0.120954	0.9963	10.4458	-0.14771	0.154182	0.995735	Yes	Yes	Yes	Yes
O15042	U2SURP	33	24	1	0.991673	0.960594	0.964443	0.941877	0.874692	0.721503	0.533533	0.383905	0.266439	0.185181	0.129719	0.0998616	0.0833579	0.0840479	0.0889179	1	0.993395	0.969801	0.981011	0.928609	0.877323	0.73155	0.543831	0.380006	0.265964	0.179657	0.133912	0.104543	0.0861137	0.0998318	0.104874	10.1962	-0.154138	0.0084478	0.997569	10.2106	-0.158161	0.0279695	0.997175	Yes	Yes	Yes	Yes
O15047	SETD1A	15	17	1	1.00175	0.988777	0.959942	0.935682	0.856661	0.679805	0.493453	0.344032	0.225671	0.158762	0.122607	0.0853602	0.0766239	0.0674874	0.0564696	1	1.00149	0.963959	0.983771	0.912181	0.827902	0.650619	0.490171	0.354522	0.231138	0.177127	0.131723	0.0915534	0.0668899	0.05208	0.0543386	9.88675	-0.160643	0	0.998779	9.78637	-0.154912	0	0.997823	Yes	Yes	Yes	Yes
O15056	SYNJ2	11	11	1	1	1.05981	1.06766	0.989821	0.933808	0.786204	0.585906	0.383853	0.274413	0.202184	0.149137	0.122511	0.107268	0.118656	0.125248	1	0.945702	0.943198	0.9678	0.915879	0.85326	0.710624	0.496598	0.311997	0.204207	0.1254	0.10514	0.0718473	0.0665493	0.0781026	0.0498636	10.451	-0.179455	0.082852	0.996086	9.8592	-0.172702	0.0038813	0.994395	Yes	Yes	Yes	Yes
O15061	SYNM		1																	1	2.07078	1.72688	1.60399	1.1152	1.80636	1.62899	1.66935	0.784738	0.956181	0.82894	0.477176	0.447128	0.290539	0.893198	1.15517						0	0.652641	0.0586356		Yes
O15062	ZBTB5	1	1	1	1.43979	1.12939	1.16015	1.02571	0.902933	0.814576	0.460001	0.392276	0.296699	0.220392	0.191629	0.159035	0.140755	0.118467	0.0902561	1	1.04853	1.05832	1.05152	0.824258	0.753243	0.738315	0.552547	0.385938	0.313774	0.285896	0.221188	0.180715	0.168828	0.109227	0.107245	10.2754	-0.174089	0.0998645	0.920182	10.2163	-0.11914	0	0.983912	Yes	Yes	Yes	Yes
O15063	KIAA0355	2		1	0.985559	1.06902	1.00049	0.906633	0.93553	0.735813	0.526798	0.39304	0.296068	0.217761	0.182084	0.188748	0.141948	0.157256	0.172812																	10.244	-0.167663	0.126432	0.993451					Yes		Yes
O15066	KIF3B	6	10	1	0.991927	1.00133	1.00712	0.938679	0.848462	0.642994	0.408525	0.249786	0.161668	0.119386	0.102063	0.0984427	0.0699401	0.0834037	0.0775226	1	0.963373	0.978798	0.971062	0.909027	0.840786	0.659094	0.423469	0.233805	0.120331	0.0792405	0.0619598	0.0447303	0.0353856	0.0467229	0.0537246	9.41144	-0.201725	0.0507562	0.999018	9.43428	-0.203524	0.00359654	0.995803	Yes	Yes	Yes	Yes
O15067	PFAS	54	45	1	0.97678	0.974525	0.979582	0.971505	0.929812	0.825071	0.742129	0.624003	0.525066	0.434486	0.32645	0.216638	0.166632	0.0864126	0.0610469	1	1.01011	1.00209	1.01315	0.970163	0.936271	0.831197	0.723653	0.614861	0.516442	0.435648	0.364852	0.275678	0.191012	0.091675	0.0597718	12.3507	-0.115958	0	0.988894	12.4054	-0.109294	0	0.988583	Yes	Yes	Yes	Yes
O15068	MCF2L	2	3	1	1.1025	1.01035	0.980595	0.947793	0.703699	0.626382	0.433221	0.264444	0.109138	0.0964258	0.0817714	0.0640557	0.053084	0.0663488	0	1	1.09175	1.15371	0.963444	1.00128	0.805678	0.62418	0.436367	0.296898	0.209667	0.183112	0.132811	0.086726	0.0943002	0.0379629	0.106429	9.18705	-0.179342	0	0.988854	9.5196	-0.170777	0.0358933	0.985029	Yes	Yes	Yes	Yes
O15075	DCLK1		1																	1	1.32463	1.28568	1.11895	1.07824	1.06959	0.914159	0.728403	0.476777	0.49826	0.421597	0.317758	0.807212	0.618946	1.17362	1.02619						-0.252433	0.670888	0.438067		Yes
O15078	CEP290	5		1	0.985593	1.00689	0.991578	0.947107	0.911543	0.813146	0.69573	0.563899	0.457171	0.389156	0.317601	0.273001	0.217905	0.178921	0.16819																	12.0222	-0.100932	0	0.998887					Yes		Yes
O15084	ANKRD28	17	14	1	0.977032	0.95552	0.945554	0.908944	0.785048	0.622236	0.393818	0.248996	0.15741	0.106199	0.081415	0.0562639	0.0599598	0.0634889	0.0560967	1	1.02433	0.971463	0.95823	0.920317	0.75764	0.580539	0.374081	0.237057	0.14276	0.0965207	0.0693552	0.0530699	0.0402058	0.0419553	0.0436756	9.24541	-0.179201	0	0.995983	9.06037	-0.18567	0	0.9979	Yes	Yes	Yes	Yes
O15085-2	ARHGEF11	11	8	1	1.01497	1.03168	1.00423	0.953436	0.863537	0.724724	0.515895	0.379461	0.254634	0.184881	0.151569	0.132142	0.113248	0.119444	0.1295	1	1.02932	1.01621	1.03936	0.955919	0.857331	0.722194	0.549822	0.392997	0.271808	0.203924	0.146619	0.124792	0.0949706	0.094755	0.0954327	10.0927	-0.162897	0.0672384	0.997997	10.2597	-0.149021	0.0166163	0.997849	Yes	Yes	Yes	Yes
O15091	KIAA0391	12	18	1	0.969189	0.915836	0.948289	0.857885	0.735464	0.544806	0.307501	0.191758	0.117381	0.0750409	0.0515927	0.0458788	0.0324713	0.0348651	0.0278749	1	1.00438	0.975356	0.944648	0.905039	0.779586	0.549107	0.340378	0.228336	0.140321	0.106213	0.072456	0.0587886	0.0589684	0.044686	0.0436912	8.73101	-0.196386	0	0.992993	8.9642	-0.187829	0.0032232	0.998184	Yes	Yes	Yes	Yes
O15111	CHUK	23	16	1	0.976378	0.959175	0.956559	0.920521	0.784866	0.60673	0.375245	0.245261	0.143769	0.0962031	0.0695757	0.0530655	0.0425722	0.0298613	0.0220025	1	0.948104	0.946876	0.943991	0.87748	0.761647	0.572005	0.377109	0.24952	0.162432	0.11581	0.0856579	0.0577281	0.0407106	0.0361304	0.0284246	9.17951	-0.189512	0	0.997433	9.03919	-0.177113	0	0.994997	Yes	Yes	Yes	Yes
O15116	LSM1	6	15	1	1.00717	1.07009	1.03836	1.01706	0.930507	0.862436	0.832125	0.701288	0.620252	0.639593	0.617604	0.613617	0.566745	0.653106	0.779971	1	1.17037	1.0988	1.0506	1.0466	0.996102	0.885314	0.836666	0.709926	0.630421	0.610912	0.57477	0.567397	0.540608	0.634781	0.628289		-0.0931289	0.633985	0.913318		-0.101891	0.580063	0.92622	Yes	Yes
O15118	NPC1	11	14	1	0.981618	0.980387	1.01003	1.01783	0.985434	0.881929	0.761758	0.63235	0.556461	0.478363	0.426537	0.374087	0.313836	0.283989	0.237048	1	0.975538	0.977894	1.04497	0.953372	0.939196	0.837684	0.75495	0.627517	0.541484	0.478627	0.411581	0.358773	0.309384	0.274672	0.211327	13.2965	-0.0920251	0.128902	0.996533	13.2408	-0.0832824	0	0.996319	Yes	Yes	Yes	Yes
O15120	AGPAT2	5	4	1	1.00722	1.00803	0.993251	0.964806	0.818957	0.684023	0.463024	0.325278	0.204717	0.153689	0.111269	0.087089	0.0766087	0.0811796	0.0701901	1	1.01614	0.97678	0.914914	0.919712	0.750472	0.621354	0.420377	0.285196	0.172646	0.133362	0.103654	0.0761388	0.056532	0.0623634	0.0431822	9.73426	-0.167905	0.0163429	0.998806	9.28298	-0.166294	0	0.995395	Yes	Yes	Yes	Yes
O15121	DEGS1	2		1	1.09119	1.0384	1.05937	0.929366	0.841999	0.723139	0.55491	0.424587	0.351872	0.267935	0.184394	0.164675	0.119745	0.14201	0.11591																	10.513	-0.125895	0.00182921	0.991922					Yes		Yes
O15126	SCAMP1	15	14	1	1.01075	0.996577	1.00907	0.979283	0.950437	0.881031	0.822426	0.732737	0.721315	0.706892	0.706603	0.71856	0.637308	0.749813	0.910519	1	1.01168	0.977685	1.01627	0.990133	0.970428	0.90118	0.787128	0.721204	0.675699	0.570326	0.575373	0.601349	0.534972	0.674484	0.696905		-0.0870528	0.733152	0.830493		-0.102002	0.607402	0.947974	Yes	Yes
O15127	SCAMP2	6	1	1	1.1364	1.04977	0.957062	1.06772	1.24279	1.01935	0.9488	0.838005	0.760721	0.812803	0.702181	0.503269	0.406784	0.63191	0.94331	1	1.02538	1.13668	1.05285	1.05517	1.17171	0.728403	0.739186	0.84975	0.581496	0.407849	0.405014	0.554451	0.332746	0.428667	0.462472		-0.0897456	0.644291	0.651993	14.1034	-0.0993584	0.375202	0.870554	Yes	Yes
O15131	KPNA5	1		1	0.967098	1.02729	0.838713	0.869098	0.82723	0.758415	0.524446	0.386512	0.405832	0.296908	0.238161	0.231144	0.185349	0.25487	0.235196																	10.4553	-0.116326	0.106917	0.96925					Yes		Yes
O15143	ARPC1B	19	20	1	1.13255	1.00808	1.02921	0.983697	0.926107	0.864182	0.791167	0.684312	0.633066	0.621902	0.581416	0.567279	0.454174	0.405637	0.187105	1	0.955693	0.92101	0.963931	0.936502	0.866739	0.793537	0.755362	0.674277	0.601153	0.524445	0.477636	0.498655	0.46834	0.44226	0.186561	15.6289	-0.0629998	0	0.945966	14.7083	-0.0636702	0	0.952092	Yes	Yes	Yes	Yes
O15144	ARPC2	53	39	1	0.97721	0.967152	0.966718	0.995363	0.969755	0.87686	0.849044	0.760245	0.719407	0.688675	0.668445	0.698336	0.58495	0.563203	0.276205	1	1.01481	0.996194	0.982552	1.00535	0.97425	0.909859	0.811225	0.734769	0.656816	0.593494	0.55865	0.572096	0.541702	0.523839	0.21789	19.0315	-0.0484782	0	0.912445	16.6093	-0.0579325	0	0.947901	Yes	Yes	Yes	Yes
O15145	ARPC3	16	19	1	0.963144	0.951028	0.949961	0.985764	0.925485	0.801571	0.627299	0.481681	0.319131	0.238574	0.164688	0.11383	0.0852366	0.0643759	0.0284874	1	0.978232	0.978188	0.979297	0.964302	0.950623	0.781382	0.666705	0.50084	0.36452	0.269465	0.18926	0.136912	0.104225	0.0830025	0.0555301	10.919	-0.151433	0	0.996425	11.1488	-0.14027	0	0.997862	Yes	Yes	Yes	Yes
O15151	MDM4	8	4	1	1.0183	1.03757	1.04289	1.05201	0.904579	0.787352	0.682452	0.544855	0.421446	0.292849	0.212999	0.153896	0.136125	0.127452	0.0883073	1	1.1262	1.00264	0.962266	0.882891	0.946523	0.715596	0.721089	0.582848	0.412384	0.352484	0.280413	0.269621	0.208484	0.209303	0.187418	11.4315	-0.127894	0	0.994087	11.753	-0.101117	0.00819037	0.977031	Yes	Yes	Yes	Yes
O15155	BET1	7	5	1	0.992168	1.02374	1.01543	0.978881	0.908842	0.793248	0.674673	0.549553	0.447902	0.375117	0.331047	0.307827	0.239964	0.257069	0.23937	1	0.992403	1.08802	1.03248	1.01807	0.940826	0.849636	0.66861	0.515287	0.412426	0.358315	0.315221	0.256638	0.251329	0.235225	0.210188	11.7819	-0.109234	0.15274	0.998402	11.4993	-0.132982	0.186653	0.993964	Yes	Yes	Yes	Yes
O15156-2	ZBTB7B	1	1	1	1.00284	0.910439	1.1344	1.00302	1.0049	0.907616	0.686664	0.6578	0.52242	0.518981	0.501644	0.334258	0.318984	0.416956	0.418422	1	1.0538	1.19052	0.991704	0.913097	0.933962	0.973133	0.769221	0.613956	0.371314	0.524886	0.467299	0.199911	0.267694	0.18888	0.208808	13.1218	-0.110619	0.357074	0.953263	12.6166	-0.110184	0.113154	0.939488	Yes	Yes		Yes
O15160	POLR1C	15	15	1	1.03081	0.972559	1.00093	0.919254	0.784364	0.644691	0.415096	0.268732	0.173673	0.126078	0.0992939	0.0646664	0.0568216	0.056722	0.0517754	1	0.987706	1.06295	0.994637	0.903655	0.77302	0.635562	0.425179	0.296972	0.193024	0.118985	0.0927114	0.071066	0.0482725	0.0425299	0.0357202	9.38373	-0.173699	0	0.997658	9.38657	-0.170054	0	0.996128	Yes	Yes	Yes	Yes
O15162	PLSCR1	4	4	1	1.07491	1.1236	1.15418	1.04849	0.9087	0.956402	0.880311	0.879951	0.82247	0.850228	0.788444	0.858532	0.589464	0.981797	1.43232	1	0.954729	1.08306	0.859428	0.995614	0.830911	0.909859	0.847177	0.640492	0.691068	0.602639	0.681459	0.710217	0.626462	0.908013	0.879618		-0.350011	0.903992	0.13873		-0.0722617	0.722705	0.559551	Yes	Yes
O15164	TRIM24	5	6	1	0.973237	1.00352	0.999441	0.948605	0.836236	0.690325	0.536313	0.388434	0.27805	0.194206	0.139639	0.108911	0.0845718	0.0583181	0.0407527	1	1.01216	1.05157	0.990376	0.981803	0.855111	0.731111	0.520043	0.412959	0.278229	0.199739	0.126391	0.112712	0.0856404	0.0851367	0.0765144	10.1219	-0.149307	0	0.998346	10.2622	-0.149146	0	0.99743	Yes	Yes	Yes	Yes
O15169	AXIN1		2																	1	0.910026	1.0222	1.07196	1.03592	0.864955	0.697871	0.513038	0.374815	0.280696	0.201409	0.13344	0.119869	0.0761548	0.0722289	0.0819187					10.146	-0.156189	0.0174181	0.991629		Yes		Yes
O15173-2	PGRMC2	17	21	1	1.00088	0.999382	0.9419	1.0165	0.980215	0.879273	0.833564	0.757808	0.71999	0.703899	0.679157	0.686131	0.621936	0.799141	0.925311	1	1.07449	1.04935	1.02114	1.02086	1.03298	0.89135	0.793978	0.716568	0.616895	0.60794	0.535522	0.577854	0.596513	0.726243	0.686343		-0.0903841	0.733807	0.768364		-0.12134	0.618992	0.931734	Yes	Yes
O15182	CETN3	5	13	1	0.911261	0.981017	0.938799	0.907161	0.757077	0.794857	0.637659	0.543	0.499691	0.500282	0.482553	0.647441	0.532774	0.679292	0.685246	1	1.07076	0.98596	1.0629	0.959298	0.912437	0.803842	0.716466	0.567467	0.51187	0.506268	0.472385	0.47582	0.460552	0.592305	0.738405		-0.109446	0.566187	0.835468		-0.137143	0.531655	0.902206	Yes	Yes
O15194	CTDSPL		3																	1	0.958207	0.963954	0.929617	0.855964	0.751462	0.598459	0.413032	0.294562	0.201003	0.154575	0.114819	0.0755802	0.0577959	0.0628161	0.0544572					9.18778	-0.157434	0	0.994283		Yes		Yes
O15211	RGL2	1		1	0.591916	0.859877	0.740546	0.719661	0.647206	0.615034	0.356295	0.255225	0.165788	0.217732	0.164947	0.19843	0	0.259171	0.000133731																	8.23698	-0.133868	0	0.798605					Yes
O15212	PFDN6	31	20	1	0.99742	0.982679	0.976929	1.00951	0.963195	0.862116	0.836947	0.733517	0.722209	0.706914	0.691314	0.712952	0.647144	0.785952	0.971828	1	1.02109	0.989968	0.983867	1.01105	0.974289	0.881581	0.826633	0.723756	0.676439	0.623177	0.588333	0.640874	0.635475	0.783264	0.877578		-0.091676	0.747496	0.729248		-0.105236	0.689257	0.819145	Yes	Yes
O15213	WDR46	3	3	1	0.981435	0.894338	0.946753	0.824057	0.714351	0.502501	0.304062	0.201213	0.109696	0.0780735	0.0603168	0.046529	0.045491	0.0453053	0.0508624	1	1.03077	1.26323	1.04232	0.946051	0.821083	0.649403	0.531826	0.405259	0.318882	0.222124	0.178144	0.2619	0.199205	0.301739	0.272843	8.54739	-0.188106	0	0.99088	9.90379	-0.155991	0.204546	0.953843	Yes	Yes	Yes	Yes
O15226-2	NKRF	15	18	1	0.968113	0.989409	0.950897	0.882512	0.762103	0.552084	0.335279	0.235351	0.160507	0.120288	0.0996351	0.0811485	0.0677969	0.0621664	0.0570071	1	0.976544	0.978915	0.947412	0.879438	0.753259	0.531113	0.349396	0.243676	0.162934	0.128944	0.101367	0.0809496	0.0596962	0.0676833	0.0912627	8.9222	-0.178409	0.0125064	0.997735	8.87971	-0.175659	0.0191836	0.997414	Yes	Yes	Yes	Yes
O15228	GNPAT	17	21	1	1.0031	0.987574	0.979835	0.953055	0.826472	0.643055	0.404596	0.272804	0.166684	0.116557	0.0779565	0.0587517	0.0570754	0.061218	0.0590804	1	1.00445	0.937041	0.942807	0.923444	0.783989	0.6387	0.478986	0.338918	0.238768	0.20363	0.172474	0.143691	0.103825	0.106525	0.0742502	9.43211	-0.188485	0.0147158	0.999073	9.69551	-0.139659	0	0.996458	Yes	Yes	Yes	Yes
O15230	LAMA5	3	5	1	0.928993	0.964047	1.01755	0.918985	0.723188	0.669371	0.521194	0.410733	0.308483	0.258055	0.222758	0.274383	0.201085	0.175292	0.157267	1	0.996494	1.0561	1.05792	1.01453	0.935226	0.744497	0.600526	0.4623	0.449094	0.333544	0.269649	0.282406	0.263325	0.240921	0.219329	10.0304	-0.119909	0.067644	0.989443	11.0293	-0.130812	0.195615	0.99191	Yes	Yes	Yes	Yes
O15231-3	ZNF185	15	10	1	0.97167	0.97927	0.988161	0.959492	0.9081	0.8401	0.756927	0.668433	0.59252	0.536048	0.470457	0.412384	0.336744	0.287235	0.242511	1	0.996455	1.01444	1.05265	0.969964	0.921717	0.900975	0.827814	0.724929	0.586294	0.544291	0.442729	0.382626	0.339324	0.281374	0.213137	13.9214	-0.0751668	0	0.995324	14.0817	-0.0825574	0	0.994836	Yes	Yes	Yes	Yes
O15234	CASC3	12	12	1	0.991825	0.961225	0.998385	0.93474	0.956942	0.808273	0.834368	0.734419	0.723701	0.755229	0.787184	0.812537	0.661409	0.805951	0.905274	1	1.00148	1.04343	1.02974	0.984409	0.94369	0.848154	0.828171	0.731503	0.673183	0.62296	0.609181	0.64071	0.571443	0.632563	0.685263		-0.114717	0.777423	0.748343		-0.0747781	0.606924	0.966244	Yes	Yes
O15235	MRPS12	6	7	1	0.984443	0.960405	0.940302	0.932662	0.811566	0.617786	0.385788	0.260091	0.193332	0.182536	0.167914	0.162912	0.143098	0.143453	0.111503	1	0.9986	1.02078	1.05527	0.94373	0.819449	0.598371	0.392687	0.287141	0.216164	0.193244	0.175084	0.164917	0.13768	0.134358	0.101975	9.25338	-0.191573	0.11291	0.996063	9.30614	-0.1841	0.109286	0.997617	Yes	Yes	Yes	Yes
O15240	VGF	1		1	1.23713	1.08138	1.26457	1.26355	0.828259	0.751573	1.01066	0.775493	0.513273	0.498103	0.578138	0.355263	0.418605	0.639187	0.867066																		-2.18935	0.552805	0.665226					Yes
O15254	ACOX3	10	11	1	0.980844	0.983657	1.01141	1.02236	0.942832	0.895117	0.778298	0.662072	0.61873	0.628566	0.658026	0.629642	0.545974	0.672277	0.835343	1	1.03576	1.0648	1.01226	1.0157	0.946967	0.847216	0.726556	0.65639	0.547334	0.511427	0.484218	0.520691	0.492057	0.577792	0.617969		-0.129708	0.652813	0.88017		-0.123127	0.526674	0.966904	Yes	Yes
O15258	RER1	3	5	1	0.968187	0.93315	0.936675	0.897767	0.815799	0.66683	0.467358	0.32023	0.233673	0.151085	0.110303	0.0613202	0.0994509	0.0817497	0.0435513	1	0.927936	0.940876	0.931536	0.880814	0.774891	0.576005	0.439011	0.294165	0.208968	0.161986	0.122085	0.109854	0.088467	0.077664	0.101578	9.67619	-0.158264	0	0.993194	9.27859	-0.150588	0	0.992571	Yes	Yes	Yes	Yes
O15259-4	NPHP1	1		1	0.998869	0.908586	0.911239	0.851586	0.660107	0.594187	0.380315	0.27398	0.161813	0.0935761	0.0989449	0.0676155	0.061425	0	0																	8.83399	-0.168287	0	0.985128					Yes		Yes
O15260	SURF4	11	7	1	0.980093	0.968868	0.964417	0.937467	0.879262	0.654948	0.495595	0.329414	0.223189	0.19382	0.135829	0.114104	0.0961077	0.0821266	0.0850836	1	0.977081	1.00178	0.997576	0.909463	0.842936	0.68705	0.503374	0.404918	0.274892	0.244615	0.176989	0.149391	0.136079	0.145192	0.126839	9.84313	-0.163416	0.0352153	0.997834	10.0869	-0.138651	0.0473403	0.997704	Yes	Yes	Yes	Yes
O15264	MAPK13	6	6	1	1.06216	1.02455	0.985112	1.01882	0.966462	0.781445	0.649743	0.488048	0.316428	0.179636	0.115512	0.0710615	0.0771566	0.0689387	0.0621818	1	0.978042	0.930706	0.993547	1.00473	0.898775	0.799706	0.602663	0.446752	0.341431	0.236188	0.202988	0.11793	0.0970657	0.119926	0.102624	10.8941	-0.164673	0	0.995051	10.8108	-0.145097	0.0286734	0.995679	Yes	Yes	Yes	Yes
O15265-2	ATXN7	3	2	1	1.10348	1.01368	1.01919	1.01798	0.840222	0.659129	0.489741	0.349802	0.275597	0.20381	0.21617	0.190983	0.180327	0.208336	0.222627	1	1.01197	1.09182	1.0406	0.85691	0.715245	0.502544	0.32159	0.190355	0.109416	0.103301	0.0812018	0.0656945	0.0530863	0.0670076	0.0609443	9.75263	-0.178209	0.174056	0.991449	8.62988	-0.192324	0.015323	0.993717	Yes	Yes	Yes	Yes
O15269	SPTLC1	18	16	1	0.96682	0.93823	0.928842	0.927135	0.79323	0.605541	0.3704	0.252354	0.168285	0.116306	0.0949105	0.0652652	0.0624941	0.05789	0.0526774	1	0.974746	0.946405	0.947167	0.865134	0.73575	0.539452	0.378749	0.244432	0.157429	0.102232	0.0634922	0.0520241	0.0337498	0.0297152	0.0412462	9.20677	-0.181265	0.00912612	0.995438	8.88718	-0.178352	0	0.995226	Yes	Yes	Yes	Yes
O15270	SPTLC2	21	24	1	0.953067	0.951357	0.928265	0.889568	0.766519	0.589788	0.357701	0.230549	0.135914	0.0898489	0.0604094	0.0394518	0.0339823	0.0389174	0.037473	1	1.00079	0.95494	0.961756	0.896921	0.778325	0.619763	0.440768	0.310537	0.223305	0.17071	0.131667	0.121163	0.103114	0.114542	0.111611	9.03083	-0.189841	0	0.994033	9.42376	-0.153593	0.0321802	0.996966	Yes	Yes	Yes	Yes
O15287	FANCG	7	13	1	1.06363	0.964033	1.01428	0.955219	0.811791	0.658032	0.449103	0.293321	0.208123	0.180371	0.129682	0.11407	0.116696	0.103685	0.141236	1	0.999327	0.979919	0.944847	0.892388	0.779567	0.595553	0.410213	0.268104	0.174658	0.141249	0.102084	0.0798735	0.0690998	0.059939	0.0490723	9.55104	-0.177554	0.0773103	0.995657	9.23288	-0.166622	0	0.997855	Yes	Yes	Yes	Yes
O15294	OGT	32	36	1	0.972349	1.00463	0.974792	0.96578	0.872211	0.707246	0.48594	0.345087	0.226319	0.159482	0.121817	0.0891368	0.0662195	0.0592864	0.0448407	1	0.97887	0.959953	0.979941	0.941968	0.835063	0.676386	0.488985	0.338961	0.236489	0.174362	0.118912	0.0879974	0.0599304	0.0504674	0.047	9.96958	-0.165813	0	0.999305	9.84958	-0.160187	0	0.998311	Yes	Yes	Yes	Yes
O15297	PPM1D	1		1	0.978799	1.0764	1.07156	0.981373	0.78117	0.702451	0.523442	0.353967	0.266436	0.195166	0.153417	0.124243	0.106526	0.100876	0.129857																	9.97378	-0.150197	0.0380054	0.990892					Yes		Yes
O15304	SIVA1	1		1	0.910372	0.927546	0.94633	0.922682	0.730831	0.635565	0.404376	0.336471	0.2289	0.165766	0.117393	0.107673	0.107423	0.115545	0.103594																	9.36433	-0.149689	0.0167047	0.98874					Yes		Yes
O15305	PMM2	22	18	1	0.98696	0.986845	0.992705	0.991029	0.926713	0.81744	0.74699	0.608295	0.476755	0.359136	0.255315	0.167185	0.127438	0.053223	0.0320007	1	1.03578	0.962672	0.989267	0.975539	0.940539	0.835856	0.78263	0.608992	0.502242	0.404405	0.304166	0.214334	0.138114	0.0599541	0.0445227	11.967	-0.132042	0	0.992324	12.2792	-0.125203	0	0.990172	Yes	Yes	Yes	Yes
O15315	RAD51B	1		1	0.997782	0.915662	0.964544	0.841486	0.68443	0.5746	0.430083	0.245445	0.171215	0.116152	0.0722895	0.0514603	0.0687823	0.0851762	0																	8.9091	-0.165552	0	0.988845					Yes		Yes
O15318	POLR3G	2	3	1	0.955139	0.973151	0.945172	1.10693	0.92775	0.844574	0.794746	0.700952	0.607621	0.472648	0.442591	0.461558	0.450046	0.420385	0.314137	1	0.97049	0.944348	1.04381	0.941068	0.939508	0.756253	0.78676	0.592758	0.530455	0.484241	0.315379	0.3249	0.30007	0.310161	0.165024	14.3075	-0.0832223	0.278042	0.968711	12.8223	-0.08674	0	0.979634	Yes	Yes	Yes	Yes
O15320	CTAGE5	27	18	1	0.975158	0.991425	0.975856	0.988006	0.947411	0.86238	0.812905	0.705966	0.665615	0.642311	0.609569	0.599951	0.50578	0.484685	0.334571	1	0.978647	0.986707	0.988087	0.987044	0.943948	0.841461	0.767425	0.672236	0.601461	0.560993	0.523898	0.507309	0.470983	0.423178	0.246354	17.4626	-0.0524163	0	0.977936	15.2468	-0.0626938	0	0.981668	Yes	Yes	Yes	Yes
O15327	INPP4B	9	6	1	0.958388	1.03046	0.998179	0.986737	0.908652	0.789004	0.607838	0.452922	0.307084	0.21586	0.150535	0.103734	0.0904451	0.0613656	0.0521366	1	1.00671	1.04564	1.02222	0.997348	0.911102	0.816828	0.680847	0.505372	0.375944	0.295421	0.266267	0.226152	0.193526	0.208883	0.224968	10.7449	-0.153082	0	0.998395	11.2173	-0.142049	0.159567	0.996291	Yes	Yes	Yes	Yes
O15344	MID1	17	13	1	0.96045	0.981688	0.999767	0.951104	0.833758	0.67135	0.4435	0.29888	0.19385	0.12836	0.107576	0.0909352	0.0761428	0.0825903	0.0879875	1	0.975971	1.03239	0.981282	0.92378	0.834912	0.640894	0.432796	0.287545	0.18804	0.112969	0.0878765	0.0593188	0.0486408	0.056023	0.061268	9.61078	-0.181519	0.037432	0.998049	9.51704	-0.17707	0	0.998034	Yes	Yes	Yes	Yes
O15347	HMGB3	15	14	1	0.999322	1.0153	0.983507	1.00816	0.966629	0.905446	0.780952	0.694403	0.631598	0.613568	0.584818	0.59799	0.519427	0.67641	0.824287	1	0.963894	1.01649	1.04642	1.01882	0.935304	0.878058	0.777014	0.678052	0.587348	0.531044	0.492983	0.523165	0.53003	0.612845	0.608259		-0.124583	0.633454	0.88334		-0.113794	0.541033	0.965626	Yes	Yes
O15355	PPM1G	38	36	1	0.984244	1.01326	0.973549	1.01441	0.958538	0.830314	0.682734	0.546029	0.395	0.321495	0.247376	0.188372	0.155519	0.122512	0.0886416	1	1.00606	0.992201	0.985124	0.997715	0.977475	0.819145	0.712295	0.549435	0.432218	0.325284	0.257438	0.212574	0.16798	0.127355	0.0910829	11.5872	-0.126026	0.0030868	0.998701	11.7588	-0.121861	0	0.998697	Yes	Yes	Yes	Yes
O15357	INPPL1	27	18	1	0.980184	0.986859	0.997812	0.96778	0.925762	0.820039	0.682263	0.511402	0.343537	0.226443	0.146265	0.089951	0.081783	0.0723609	0.0531605	1	1.01153	1.00914	1.01834	1.01631	0.937916	0.856835	0.73109	0.55028	0.37284	0.244136	0.162627	0.0787995	0.0627265	0.0600865	0.0518649	11.1311	-0.156011	0	0.997826	11.4398	-0.162244	0	0.997592	Yes	Yes	Yes	Yes
O15360	FANCA	8	6	1	1.02908	1.06589	0.978336	0.936238	0.821702	0.635051	0.375207	0.253165	0.182979	0.14631	0.0967669	0.0744221	0.0867308	0.0840507	0.0720482	1	0.986978	1.10724	1.03272	0.955708	0.81764	0.616566	0.433286	0.27265	0.166058	0.127516	0.0881628	0.0831198	0.0514295	0.045817	0.0613381	9.3224	-0.191901	0.0452539	0.996695	9.42966	-0.180642	0.00893039	0.99457	Yes	Yes	Yes	Yes
O15370	SOX12	1	3	1	1.01501	1.05828	1.04203	1.07631	0.889004	0.902804	0.849805	0.596896	0.563334	0.482219	0.432291	0.529069	0.427636	0.523187	0.433441	1	1.03647	1.05042	1.09251	1.00495	0.996832	0.831758	0.735818	0.612019	0.497852	0.440367	0.390128	0.383937	0.33779	0.397066	0.327746	13.7991	-0.134844	0.454457	0.960447	12.5231	-0.116365	0.317759	0.986292	Yes	Yes
O15371	EIF3D	41	44	1	1.00082	1.00043	0.992065	1.0338	0.950144	0.791433	0.556304	0.387974	0.207017	0.133915	0.0957581	0.0712916	0.0582815	0.0593917	0.0621909	1	1.0078	0.960823	1.02316	0.926288	0.829497	0.722388	0.551833	0.365461	0.217717	0.11983	0.0780262	0.0496595	0.037988	0.0354129	0.0300544	10.3464	-0.19742	0.0271849	0.998603	10.0496	-0.176011	0	0.993814	Yes	Yes	Yes	Yes
O15372	EIF3H	49	48	1	0.984029	0.956361	0.968856	0.987087	0.92297	0.829015	0.738874	0.591394	0.437599	0.34647	0.261896	0.206744	0.166663	0.107328	0.0585515	1	0.994599	0.968122	0.963862	0.975701	0.906768	0.81989	0.726957	0.575911	0.460551	0.346103	0.262056	0.207515	0.1645	0.103793	0.0584673	11.8995	-0.123349	0	0.996025	11.8488	-0.121394	0	0.995381	Yes	Yes	Yes	Yes
O15379	HDAC3	9	9	1	1.00344	1.04903	1.01389	0.988267	0.926476	0.837087	0.669025	0.510957	0.385768	0.286233	0.20994	0.153192	0.110796	0.0998063	0.0733519	1	0.988308	1.0409	1.0142	0.977331	0.961355	0.819615	0.65764	0.528511	0.403499	0.272281	0.220806	0.15748	0.10671	0.0787924	0.0821626	11.3342	-0.136002	0	0.998477	11.3592	-0.135858	0	0.997613	Yes	Yes	Yes	Yes
O15381	NVL		3																	1	1.0759	0.977481	0.940074	0.946487	0.725354	0.529368	0.369339	0.333399	0.212669	0.179151	0.124002	0.152907	0.117422	0.154659	0.14881					8.98206	-0.170659	0.0965662	0.99244		Yes		Yes
O15382	BCAT2	25	18	1	0.995537	1.01821	1.00578	1.0012	0.934595	0.852197	0.775814	0.696026	0.638034	0.628539	0.59751	0.609337	0.544268	0.641122	0.715015	1	1.00194	0.962569	1.14231	0.954419	0.877198	0.844288	0.737991	0.652336	0.592361	0.526722	0.495896	0.534357	0.520792	0.58059	0.633037		-0.0921406	0.61274	0.959523		-0.0965809	0.532426	0.934185	Yes	Yes
O15392-2	BIRC5	3	3	1	0.969205	0.960208	0.945249	0.920042	0.823169	0.754163	0.652809	0.473191	0.391809	0.366445	0.36194	0.366308	0.365055	0.34509	0.33633	1	0.934157	1.0421	0.87591	0.932269	0.830272	0.917663	0.707262	0.422857	0.327066	0.253736	0.169087	0.139645	0.125504	0.11294	0.0961621	11.2682	-0.112848	0.282871	0.984431	11.0657	-0.167575	0.0680381	0.975968	Yes	Yes	Yes	Yes
O15397	IPO8	12	12	1	1.00477	1.02364	0.956199	0.907194	0.816828	0.636567	0.413194	0.272099	0.173827	0.13108	0.106027	0.0744567	0.0649259	0.0615441	0.047415	1	1.00658	0.953295	0.991171	0.937783	0.818056	0.627231	0.415349	0.277307	0.169741	0.12253	0.0847831	0.0617977	0.043854	0.0452316	0.0424057	9.41349	-0.173136	0.00190627	0.997875	9.41908	-0.180259	0	0.998647	Yes	Yes	Yes	Yes
O15400	STX7	14	11	1	1.08633	1.0558	1.0075	1.02386	0.950683	0.85734	0.839244	0.731144	0.655661	0.634735	0.664589	0.649608	0.594538	0.739244	0.999139	1	0.973375	0.993649	0.981353	0.971799	0.932728	0.891574	0.791059	0.731664	0.665364	0.583441	0.55593	0.607038	0.572752	0.711348	0.807338		-0.0950634	0.707344	0.714909		-0.0999955	0.63958	0.863933	Yes	Yes
O15417	TNRC18	2	2	1	1.13566	1.15502	1.18486	1.15875	1.2453	1.07109	1.02953	0.890774	0.895488	0.905182	0.88974	0.850641	0.821202	1.09648	1.53372	1	0.888063	0.98267	0.915296	0.947967	0.870239	0.688786	0.385213	0.276072	0.207538	0.187689	0.205541	0.092575	0.0830511	0.194505	0.10544		0	1.5	0.479674	9.51524	-0.20866	0.116845	0.982698	Yes	Yes		Yes
O15427	SLC16A3	10	7	1	0.962325	0.914613	0.869866	0.911188	0.823638	0.636936	0.426611	0.28515	0.178443	0.119288	0.0789316	0.0547217	0.0474716	0.0311531	0.0238731	1	0.982252	0.885844	0.813358	0.912947	0.766268	0.613629	0.427301	0.301168	0.180481	0.123581	0.083098	0.0498668	0.0344225	0.0217655	0.0125867	9.45232	-0.179281	0	0.988032	9.30058	-0.172462	0	0.976651	Yes	Yes	Yes	Yes
O15431	SLC31A1	4	3	1	0.936918	1.00517	0.934254	0.942115	0.975128	0.736329	0.560975	0.390944	0.311275	0.342558	0.273259	0.141775	0.105173	0.173598	0.167102	1	0.996682	1.00821	0.922781	1.03271	0.916136	0.748031	0.439226	0.40489	0.296265	0.221807	0.141099	0.125667	0.0851755	0.0997781	0.132423	10.5397	-0.150328	0.118077	0.982505	10.1418	-0.169809	0.0749256	0.990052	Yes	Yes	Yes	Yes
O15438-4	ABCC3	3	2	1	1.10492	1.16795	1.07195	1.02561	0.861903	0.752973	0.533544	0.396304	0.342744	0.289244	0.269922	0.268188	0.268947	0.246105	0.165775	1	0.957114	1.00407	0.888057	0.876515	0.773505	0.510349	0.335352	0.258042	0.156461	0.142691	0.0870621	0.108033	0.0810497	0.101066	0.116308	10.3548	-0.155644	0.206003	0.974159	8.82465	-0.183049	0.0524509	0.991281	Yes	Yes	Yes	Yes
O15439	ABCC4	28	22	1	1.01729	1.0165	0.986766	0.934488	0.836615	0.660306	0.465445	0.314266	0.204293	0.14188	0.112266	0.0875449	0.0709021	0.0661557	0.0628212	1	1.01356	0.993958	0.957177	0.907739	0.836419	0.671628	0.474781	0.331024	0.225119	0.153388	0.111421	0.079558	0.0647393	0.0642872	0.0605524	9.68847	-0.166651	0.00522437	0.999075	9.75645	-0.161311	0	0.997654	Yes	Yes	Yes	Yes
O15440	ABCC5	3	4	1	1.09751	1.05327	1.07627	0.917579	0.798248	0.690751	0.47796	0.251498	0.195955	0.188342	0.144019	0.173781	0.109427	0.0973333	0.0769584	1	0.924771	1.0164	0.970753	0.884242	0.78848	0.546009	0.379325	0.334252	0.215774	0.156025	0.138131	0.0950381	0.09591	0.117518	0.0862204	9.61772	-0.170372	0.059811	0.98674	9.18171	-0.157414	0.0283041	0.994248	Yes	Yes	Yes	Yes
O15446-2	CD3EAP	19	11	1	0.958547	0.943592	0.911485	0.877378	0.74452	0.578024	0.447137	0.390256	0.343187	0.3203	0.300647	0.322949	0.279887	0.337666	0.393714	1	0.975967	0.965647	0.985982	0.883638	0.804041	0.589906	0.454196	0.367789	0.303376	0.244122	0.218862	0.232717	0.214472	0.269748	0.285864	9.35619	-0.151169	0.296329	0.98093	9.44481	-0.159416	0.209574	0.991465	Yes	Yes	Yes	Yes
O15455	TLR3	2	3	1	1.04938	0.98073	0.984388	1.08988	0.98218	0.911676	0.841819	0.74385	0.697571	0.70467	0.681696	0.720906	0.611359	0.738109	0.990848	1	1.12228	1.08983	1.19592	1.18563	1.04721	0.773541	0.613462	0.391461	0.372772	0.229418	0.222917	0.159227	0.157535	0.181272	0.180532		-0.103695	0.734376	0.726825	10.6435	-0.184062	0.157967	0.957213	Yes	Yes		Yes
O15460	P4HA2	17	14	1	1.02507	1.00795	1.04951	0.967746	0.890684	0.787582	0.583328	0.425907	0.315525	0.23241	0.184983	0.154159	0.119817	0.104905	0.0827141	1	1.0252	0.995688	1.0157	0.957288	0.879946	0.748219	0.59171	0.418754	0.316087	0.220964	0.167282	0.138447	0.110371	0.0917471	0.0846902	10.661	-0.144774	0.028094	0.998088	10.576	-0.140283	1.537e-05	0.998984	Yes	Yes	Yes	Yes
O15479	MAGEB2	19	19	1	0.928644	0.918506	0.939895	0.91361	0.816342	0.640244	0.496639	0.397245	0.32995	0.269847	0.247972	0.213045	0.168402	0.180662	0.195279	1	0.94901	0.927619	0.952023	0.906096	0.797743	0.613807	0.44467	0.338502	0.250192	0.199015	0.157309	0.124098	0.0944663	0.069644	0.050542	10.0069	-0.127946	0.0985644	0.989967	9.57705	-0.145173	0	0.995006	Yes	Yes	Yes	Yes
O15484	CAPN5	1	1	1	1.00563	0.979909	0.96688	0.80402	0.770708	0.554451	0.366003	0.204577	0.135254	0.104693	0.0584203	0.0515204	0.0388363	0.0405378	0.0774083	1	1.00987	1.20175	1.06691	1.29254	0.876127	0.654577	0.482919	0.332594	0.190865	0.174573	0.106594	0.110445	0.0689605	0.0548919	0.0752091	8.86607	-0.181207	0	0.991527	9.83637	-0.195169	0.0534295	0.953958	Yes	Yes	Yes	Yes
O15498	YKT6	20	19	1	0.993525	0.973067	0.989443	0.988066	0.947493	0.846069	0.846845	0.761247	0.741936	0.707211	0.657936	0.659877	0.56113	0.442152	0.160155	1	1.02484	1.0806	1.07428	1.08187	1.0365	0.919312	0.837555	0.748711	0.683181	0.612213	0.573248	0.576877	0.526858	0.408577	0.142037	17.2045	-0.0600111	0	0.901894	16.0004	-0.0680578	0	0.936556	Yes	Yes	Yes	Yes
O15503	INSIG1		1																	1	1.1913	1.07594	1.04826	0.98304	0.929277	0.775223	0.523004	0.425698	0.303162	0.259749	0.224168	0.178093	0.149902	0.0949807	0.0836966					10.5522	-0.14753	0.0619256	0.979285		Yes		Yes
O15504	NUPL2	4	2	1	1.02639	0.962901	1.06014	0.938053	0.874692	0.715728	0.631003	0.474381	0.391322	0.318604	0.277664	0.242521	0.197001	0.176448	0.110529	1	1.02883	1.00206	1.10455	1.05405	0.95349	0.862158	0.544006	0.482113	0.382014	0.293106	0.220724	0.188284	0.210369	0.233608	0.160395	11.1112	-0.108823	0	0.994825	10.8664	-0.160469	0.168754	0.985817	Yes	Yes	Yes	Yes
O15511	ARPC5	14	13	1	0.960386	0.930194	0.929123	0.98007	0.939097	0.833357	0.835815	0.718455	0.691375	0.670411	0.639576	0.674175	0.582321	0.636206	0.695009	1	0.98465	0.938134	0.927247	1.00154	0.947479	0.863825	0.802076	0.704611	0.628735	0.577537	0.514992	0.569806	0.53958	0.573436	0.521235		-0.0645349	0.619515	0.926282		-0.0834473	0.50896	0.972858	Yes	Yes
O15514	POLR2D	9	13	1	0.96294	1.01736	0.960726	0.992833	0.93535	0.867518	0.829457	0.741309	0.725057	0.705483	0.703765	0.7427	0.652835	0.738248	0.391306	1	0.951713	1.06879	1.0225	0.967132	0.975773	0.953008	0.770962	0.650645	0.617001	0.583916	0.537305	0.569548	0.532106	0.606041	0.297601		-0.0355687	0	0.847403	17.2187	-0.0764278	0.416442	0.922531	Yes	Yes
O15516	CLOCK	3		1	0.982686	0.993684	0.989473	0.965199	0.794206	0.655343	0.4458	0.364986	0.282633	0.213503	0.181293	0.148338	0.110538	0.11188	0.124228																	9.76742	-0.146218	0.0499603	0.998167					Yes		Yes
O15525	MAFG		1																	1	0.801839	0.859354	0.908314	0.94164	0.690501	0.636331	0.41432	0.321316	0.26816	0.230873	0.167317	0.284076	0.204646	0.300929	0.49092					9.0544	-0.1838	0.261341	0.882763		Yes		Yes
O15527-4	OGG1		1																	1	1.04787	1.04198	1.06489	0.896499	0.877068	0.831426	0.615486	0.382805	0.321586	0.187678	0.172571	0.135644	0.097203	0.152619	0.0353795					10.6612	-0.15404	0.0270916	0.987808		Yes		Yes
O15530	PDPK1	12	13	1	1.00762	1.01327	0.98237	0.963121	0.874372	0.663621	0.432987	0.290054	0.169333	0.117418	0.0886683	0.0643652	0.0562835	0.0549972	0.0476503	1	1.01227	1.03366	0.997374	0.952525	0.862561	0.693703	0.444534	0.299636	0.196601	0.130127	0.0964352	0.0676592	0.0496511	0.0440058	0.0364534	9.61869	-0.19226	0.0171141	0.999548	9.73679	-0.18036	0	0.999073	Yes	Yes	Yes	Yes
O15533-3	TAPBP	5	5	1	0.94833	0.950583	0.944153	0.91147	0.904633	0.776287	0.68758	0.548703	0.507249	0.423574	0.410924	0.374796	0.291207	0.288007	0.289947	1	0.913017	0.929499	0.940687	0.897452	0.863758	0.761355	0.620327	0.528807	0.425084	0.35571	0.318173	0.331646	0.291178	0.290818	0.257758	12.5057	-0.0846323	0.0974782	0.988176	11.4809	-0.100339	0.150567	0.982945	Yes	Yes	Yes	Yes
O15534	PER1	4	3	1	0.997146	1.03597	1.00105	0.979594	0.887672	0.842449	0.686407	0.593456	0.545741	0.44918	0.457483	0.360361	0.368831	0.432474	0.444263	1	1.03536	0.917449	1.20664	0.954683	0.96617	0.728395	0.623822	0.517444	0.403702	0.34156	0.247013	0.204901	0.17496	0.155775	0.176307	12.9231	-0.103873	0.364043	0.985657	11.2168	-0.122312	0.0702423	0.969539	Yes	Yes		Yes
O15541	RNF113A	3	4	1	0.970783	0.951423	0.952733	1.02236	0.890243	0.797371	0.764015	0.645269	0.554714	0.458127	0.379324	0.384351	0.321272	0.288373	0.250584	1	0.896164	1.00366	0.925739	0.824932	0.793307	0.644368	0.52789	0.385107	0.276137	0.213936	0.155069	0.125838	0.112823	0.0973815	0.0621083	13.244	-0.0808846	0.0203334	0.98987	9.8029	-0.133752	0	0.985	Yes	Yes	Yes	Yes
O15550	KDM6A	2	1	1	0.896662	0.931863	0.94564	1.00922	0.868702	0.699443	0.47051	0.331869	0.235648	0.185241	0.166993	0	0.0730976	0.000222524	6.83687e-05	1	0.962911	1.09078	0.942119	0.929439	0.843303	0.638615	0.468593	0.345853	0.259489	0.149697	0.0991382	0.0556677	0.0303645	0	0.0448273	9.93176	-0.172226	0	0.985711	9.72907	-0.166853	0	0.990952	Yes	Yes	Yes	Yes
O15551	CLDN3		2																	1	1.09214	1.12217	1.00513	0.997209	0.964488	0.876143	0.871853	0.783644	0.744933	0.703538	0.72289	0.744541	0.708403	0.875485	0.831098						-0.0707766	0.761472	0.812739		Yes
O15554	KCNN4	1	3	1	1.00131	1.09383	0.967112	1.01535	0.845606	0.62922	0.484659	0.363143	0.249744	0.218187	0.123479	0.0890593	0.0873353	0.0460815	0.0687631	1	0.939576	0.909002	0.917877	0.831178	0.759302	0.601551	0.403346	0.295848	0.242463	0.150832	0.120948	0.0777966	0.0679739	0.0405837	0.0312233	9.87893	-0.153392	0	0.99291	9.18836	-0.155123	0	0.986727	Yes	Yes	Yes	Yes
O43143	DHX15	104	83	1	1.00511	1.01987	1.01649	1.01564	0.959645	0.872893	0.809064	0.710498	0.656567	0.626636	0.594024	0.600695	0.509154	0.56583	0.495323	1	0.973629	0.995912	0.986037	0.959563	0.928406	0.833182	0.729422	0.662744	0.603875	0.529657	0.484509	0.506468	0.473775	0.508105	0.356715		-0.0672529	0.472883	0.989627	15.4562	-0.0714697	0.3163	0.985971	Yes	Yes
O43148-2	RNMT	24	26	1	0.991924	0.961356	0.970495	0.997325	0.938731	0.810822	0.687956	0.549835	0.430657	0.342144	0.251637	0.193727	0.158338	0.096394	0.0826773	1	0.976582	1.03717	0.996014	0.975783	0.94178	0.830325	0.656387	0.561618	0.450135	0.346459	0.281649	0.216786	0.156291	0.0979835	0.0734218	11.6442	-0.122823	0	0.997246	11.7154	-0.119473	0	0.995929	Yes	Yes	Yes	Yes
O43149	ZZEF1	14	14	1	1.03714	1.01628	1.01135	0.969892	0.899996	0.742097	0.586685	0.420826	0.365667	0.274988	0.199429	0.169661	0.144369	0.134903	0.136151	1	1.019	0.989541	0.964363	0.937579	0.822058	0.644125	0.425441	0.291718	0.19362	0.124944	0.0967056	0.0639164	0.0492566	0.060506	0.0602186	10.6842	-0.135276	0.055383	0.997958	9.51201	-0.173482	0	0.998609	Yes	Yes	Yes	Yes
O43150	ASAP2	6	5	1	0.968278	0.95021	0.991268	0.922238	0.876104	0.813481	0.709858	0.492718	0.357694	0.26334	0.199057	0.161898	0.137122	0.129612	0.131531	1	0.955343	0.893949	0.988248	0.946914	0.810544	0.786898	0.612713	0.528365	0.375573	0.304456	0.246651	0.154201	0.170427	0.17794	0.14885	11.1939	-0.135769	0.0334536	0.991808	11.0822	-0.11335	0	0.985067	Yes	Yes	Yes	Yes
O43156	TTI1	12	8	1	0.953414	0.946742	0.947755	0.872123	0.789684	0.632768	0.392386	0.261084	0.164005	0.111475	0.0778322	0.0579268	0.0506796	0.0433528	0.020623	1	1.00252	0.970031	0.94858	0.941143	0.824677	0.634987	0.44101	0.283242	0.189647	0.123769	0.0862987	0.0757655	0.0417079	0.0401816	0.045197	9.26392	-0.179193	0	0.99341	9.51067	-0.176344	0	0.998177	Yes	Yes	Yes	Yes
O43157	PLXNB1		1																	1	1.11177	0.888897	1.13712	0.741402	0.79134	0.813964	0.475202	0.608383	0.306536	0.309007	0.168945	0.167395	0.182094	0	0.165274					10.6053	-0.119586	0	0.921207		Yes		Yes
O43159	RRP8	1		1	0.845498	0.918247	0.972459	0.779019	0.672548	0.475372	0.265924	0.222323	0.218968	0.140941	0	0.199094	0.153738	0	0																	8.36268	-0.164756	0	0.963316					Yes		Yes
O43164	PJA2	7	4	1	1.02581	1.02916	0.989199	0.974121	0.908233	0.822924	0.667479	0.579588	0.472317	0.426976	0.361469	0.349008	0.334348	0.362969	0.377693	1	1.13691	1.20408	1.12292	1.04764	0.849303	0.879295	0.689406	0.555406	0.442217	0.356257	0.288388	0.277888	0.275755	0.248365	0.241225	12.0367	-0.115818	0.309865	0.994362	11.7307	-0.124673	0.187783	0.954746	Yes	Yes		Yes
O43166	SIPA1L1	2	2	1	1.09227	1.04611	1.14676	0.881335	0.842742	0.6935	0.593661	0.398707	0.374438	0.255052	0.201005	0.211179	0.171542	0.178151	0.229983	1	0.988339	0.971202	0.992305	0.973572	0.784021	0.824895	0.575508	0.380793	0.391933	0.285703	0.199756	0.198696	0.0987296	0.149206	0.174609	10.3992	-0.131425	0.110341	0.974898	10.6673	-0.129224	0.0497883	0.983416	Yes	Yes	Yes	Yes
O43167	ZBTB24	1		1	0.974924	1.04899	1.01845	0.890705	0.818349	0.67715	0.485448	0.369823	0.26024	0.221753	0.198162	0.182427	0.128894	0.157407	0.147621																	9.86512	-0.144187	0.0780791	0.995145					Yes		Yes
O43169	CYB5B	27	32	1	1.02634	1.04181	1.02671	1.00971	0.955198	0.94295	0.88555	0.839129	0.87934	0.962986	0.966209	1.01438	0.882672	1.18439	1.50351	1	0.959016	1.04336	0.963229	1.00151	0.93309	0.949486	0.816015	0.746089	0.662782	0.627784	0.615924	0.639166	0.668571	0.780756	0.863797		0	1.5	0.784891		-0.127961	0.695594	0.823013	Yes	Yes
O43172-2	PRPF4	1	23	1	1.03948	0.948307	1.06313	1.01474	0.930607	0.748532	0.609801	0.426621	0.303493	0.191485	0.109081	0.0561358	0.0466522	0.0584015	0	1	0.946561	0.970306	0.975191	0.960083	0.920256	0.754083	0.599617	0.432203	0.301536	0.193354	0.113901	0.079541	0.056681	0.0579959	0.0567306	10.5948	-0.16788	0	0.993727	10.577	-0.160456	0	0.996203	Yes	Yes	Yes	Yes
O43172	PRPF4	21		1	1.012	1.04926	1.01623	0.993882	0.937984	0.818124	0.653364	0.454479	0.292021	0.183172	0.110065	0.0638594	0.0640115	0.050587	0.0435897																	10.8436	-0.173346	0	0.998035					Yes		Yes
O43175	PHGDH	59	54	1	0.987515	0.983601	0.970903	0.948963	0.866467	0.692314	0.486075	0.337224	0.219056	0.154629	0.118018	0.0857048	0.0739564	0.0735298	0.0637785	1	0.94651	0.945486	0.930106	0.90985	0.798023	0.661601	0.458817	0.295245	0.1981	0.138063	0.0944808	0.0724846	0.0529614	0.0579448	0.0652133	9.88936	-0.167876	0.0128054	0.999058	9.55687	-0.16673	0	0.993125	Yes	Yes	Yes	Yes
O43181	NDUFS4	12	11	1	0.984568	0.983402	0.948808	0.926453	0.813341	0.699196	0.602326	0.538047	0.509718	0.513737	0.528399	0.554181	0.468911	0.484215	0.296414	1	0.979427	0.887026	0.968101	0.898661	0.784809	0.667166	0.555503	0.407381	0.363626	0.327867	0.312521	0.307308	0.303898	0.306527	0.158506	13.9972	-0.0796224	0.341908	0.957303	10.4614	-0.108854	0.140527	0.980486	Yes	Yes		Yes
O43237	DYNC1LI2	21	18	1	1.00673	0.948487	0.969149	0.953848	0.870799	0.699211	0.51994	0.349956	0.232814	0.154964	0.110166	0.082431	0.0699101	0.0553185	0.0566992	1	1.02486	1.04751	1.02541	1.05535	0.976456	0.777339	0.606918	0.416499	0.284588	0.191137	0.133623	0.10174	0.0800415	0.080665	0.0718326	10.0173	-0.164843	0	0.997964	10.6272	-0.173169	0.0339341	0.996168	Yes	Yes	Yes	Yes
O43240	KLK10	1	1	1	1.04027	1.06	1.12569	0.919561	0.991739	0.968277	0.723725	0.771745	0.556864	0.532	0.61726	0.572528	0.585214	0.641378	0.737469	1	1.31553	1.21174	1.64547	1.36865	1.10734	1.03993	1.24021	0.891388	0.556269	0.624353	0.528761	0.351172	0.313037	0.419181	0.579051		-0.150039	0.613806	0.885676	13.3417	-0.269965	0.458656	0.667302	Yes	Yes
O43242	PSMD3	53	44	1	0.973716	0.971829	0.967891	0.963189	0.88054	0.755859	0.573009	0.390146	0.230235	0.144277	0.0956532	0.0629962	0.0539841	0.043593	0.0384907	1	1.01016	0.984654	0.964806	0.963366	0.910711	0.776757	0.593854	0.417385	0.268714	0.176451	0.112926	0.0639305	0.0467854	0.0350443	0.0337734	10.3029	-0.174914	0	0.997217	10.5216	-0.170998	0	0.998021	Yes	Yes	Yes	Yes
O43251-8	RBFOX2	9	10	1	1.035	1.03016	0.996946	0.986267	0.889783	0.715521	0.528813	0.391845	0.306113	0.256519	0.225586	0.198765	0.178623	0.1983	0.241191	1	0.97003	0.983437	0.929457	0.921313	0.820266	0.65934	0.497013	0.388189	0.287319	0.218133	0.183826	0.186405	0.164285	0.175313	0.178805	10.1647	-0.166542	0.176907	0.99694	9.89082	-0.143144	0.100356	0.995	Yes	Yes	Yes	Yes
O43252	PAPSS1	54	41	1	0.990624	1.00532	1.01114	0.992	0.971418	0.866131	0.827563	0.718345	0.643091	0.569076	0.485985	0.376809	0.277245	0.100954	0.0379385	1	0.977019	0.962432	0.94993	0.974219	0.970211	0.868813	0.775311	0.69091	0.610722	0.536834	0.47517	0.429607	0.326438	0.108941	0.0405642	13.8705	-0.104121	0	0.971084	13.6822	-0.0951749	0	0.958791	Yes	Yes	Yes	Yes
O43255	SIAH2	2	2	1	1.09353	1.16845	1.09256	1.04221	0.970548	0.894997	0.764919	0.62641	0.56654	0.461274	0.415146	0.324419	0.244778	0.237112	0.20078	1	0.946512	0.983006	0.998034	0.948822	0.893726	0.792398	0.721499	0.51584	0.414118	0.328002	0.288054	0.223702	0.215427	0.151858	0.128614	13.1204	-0.0959892	0.0473866	0.970839	11.63	-0.110452	0	0.99501	Yes	Yes	Yes	Yes
O43257	ZNHIT1		2																	1	1.07316	0.932016	0.96606	0.898508	0.755745	0.611847	0.324851	0.237438	0.170389	0.107101	0.0879638	0.0612618	0.0460501	0.026841	0					9.05157	-0.184267	0	0.99272		Yes		Yes
O43264	ZW10	21	26	1	0.981559	0.95401	0.942792	0.88972	0.77555	0.58531	0.352078	0.225182	0.142603	0.0870902	0.0617086	0.0504742	0.0412953	0.0376702	0.0310166	1	0.974165	0.982494	0.904846	0.911957	0.779464	0.581263	0.37142	0.253987	0.158059	0.113739	0.087244	0.0623422	0.0526275	0.0591969	0.0602847	9.03171	-0.190392	0	0.996132	9.1145	-0.176858	0	0.995525	Yes	Yes	Yes	Yes
O43272	PRODH		1																	1	0.960738	0.938446	0.952306	0.895918	0.853713	0.669971	0.561891	0.554223	0.447328	0.404629	0.339082	0.301133	0.267637	0.177755	0.0454033					11.2735	-0.0961503	0	0.973987		Yes		Yes
O43278	SPINT1	23	18	1	0.965376	0.969693	0.965934	0.975072	0.936584	0.851361	0.841971	0.782573	0.735344	0.732363	0.740406	0.800234	0.703748	0.893364	1.0985	1	1.02788	1.0267	1.00662	1.01417	0.971032	0.873365	0.812189	0.708586	0.644028	0.572628	0.532712	0.583411	0.574729	0.73731	0.745613		-0.0870248	0.813242	0.407715		-0.109569	0.623334	0.904061	Yes	Yes
O43286	B4GALT5	4	2	1	0.98826	0.933008	0.910972	0.87923	0.806725	0.676941	0.510184	0.358908	0.235789	0.175011	0.141193	0.100345	0.0838927	0.0621661	0.0785614	1	1.0276	1.01555	0.921772	0.953827	0.893528	0.665786	0.483168	0.392586	0.26533	0.173733	0.136772	0.0820853	0.0719411	0.0484608	0.0444368	9.82249	-0.147943	0	0.9906	10.0134	-0.156974	0	0.99522	Yes	Yes	Yes	Yes
O43290	SART1	24	21	1	1.0281	0.983683	0.966801	0.868545	0.747391	0.538959	0.346042	0.241722	0.176162	0.149597	0.132037	0.121825	0.103378	0.112699	0.102915	1	1.10943	0.944998	0.932179	0.854843	0.689941	0.483969	0.326683	0.206177	0.139136	0.122314	0.100579	0.0938293	0.0724185	0.0911404	0.0932129	8.85003	-0.177326	0.0618497	0.997705	8.52308	-0.179276	0.0302243	0.991221	Yes	Yes	Yes	Yes
O43291	SPINT2	11	7	1	1.01683	1.00534	0.994225	0.99418	0.970083	0.853459	0.834471	0.723543	0.683788	0.68752	0.654192	0.689415	0.591681	0.740324	0.931846	1	1.03305	0.971211	0.9669	1.02855	0.946091	0.926253	0.854296	0.731309	0.69954	0.654058	0.650103	0.649354	0.581768	0.760809	0.827094		-0.093376	0.710733	0.785516		-0.104596	0.684818	0.865528	Yes	Yes
O43292	GPAA1	8	7	1	1.04008	1.08059	1.10414	1.06581	0.969153	0.820567	0.518804	0.34638	0.238725	0.167339	0.127767	0.091394	0.0860376	0.0857591	0.0849317	1	0.979131	0.964078	0.963064	0.91517	0.791071	0.62447	0.430671	0.291821	0.185714	0.132995	0.099706	0.0922137	0.0667148	0.0564503	0.0631762	10.2604	-0.211702	0.0743361	0.99079	9.40839	-0.165725	0	0.997782	Yes	Yes	Yes	Yes
O43293	DAPK3	5	4	1	0.937665	0.884284	0.887162	0.738156	0.58129	0.427339	0.235407	0.11452	0.0722628	0.048674	0.0494198	0.0383858	0.0319741	0.0396255	0.033599	1	0.902072	0.886379	0.910586	0.880842	0.682741	0.497712	0.314082	0.215827	0.14633	0.109253	0.0776894	0.0612459	0.0613788	0.0683373	0.0787109	7.76169	-0.197596	0	0.984037	8.57085	-0.177382	0.00493982	0.98614	Yes	Yes	Yes	Yes
O43294	TGFB1I1	1		1	0.814327	1.02488	1.09927	0.92488	0.914599	0.772812	0.617467	0.484604	0.329599	0.316832	0.290663	0.329422	0.246147	0.202279	0.195053																	10.9667	-0.132346	0.176818	0.965216					Yes		Yes
O43295	SRGAP3	1		1	0.931508	0.966002	0.90634	0.925528	0.758051	0.516268	0.299113	0.15836	0.0887775	0.0778388	0.0662742	0.0596485	0.0610854	0.0532916	0.0528326																	8.72123	-0.2222	0.0266441	0.993317					Yes		Yes
O43299	AP5Z1	6	5	1	1.00974	0.974144	0.956371	0.876217	0.76282	0.555537	0.368304	0.270862	0.189225	0.134339	0.108584	0.0913002	0.0839498	0.0847889	0.0655378	1	1.00222	0.980133	0.977026	0.906501	0.796908	0.605315	0.406612	0.247402	0.175703	0.12711	0.0859539	0.0605137	0.0477729	0.0485911	0.0524263	9.0336	-0.164106	0.00898168	0.998221	9.26995	-0.176928	0	0.998564	Yes	Yes	Yes	Yes
O43301	HSPA12A	16	12	1	1.10003	0.985902	0.99089	1.00997	0.897145	0.74651	0.560243	0.438821	0.329604	0.26993	0.214125	0.184988	0.153221	0.112517	0.0792207	1	1.0167	1.0217	0.976062	0.973595	0.885724	0.753739	0.591099	0.463444	0.350214	0.296252	0.256268	0.228229	0.192117	0.181052	0.152312	10.677	-0.133761	0.0282446	0.993957	10.8307	-0.127904	0.0962912	0.999164	Yes	Yes	Yes	Yes
O43303	CCP110	2		1	0.987271	0.950059	0.984996	0.932373	0.874703	0.700812	0.473018	0.294878	0.245089	0.20455	0.160354	0.117171	0.0974826	0.103972	0.135002																	9.81399	-0.177864	0.0825487	0.996118					Yes		Yes
O43310-2	CTIF	10	8	1	0.989681	0.985302	1.01727	1.03848	1.0089	0.869928	0.725608	0.61481	0.461757	0.354136	0.240178	0.127652	0.101921	0.0744638	0.0755482	1	0.999814	1.00331	1.03733	0.991635	0.954187	0.796021	0.637236	0.522673	0.415187	0.321081	0.235363	0.130239	0.0912222	0.0679657	0.0662155	11.9823	-0.139168	0	0.994611	11.3221	-0.133826	0	0.994652	Yes	Yes	Yes	Yes
O43313	ATMIN		3																	1	1.0068	1.0544	1.04523	0.949035	1.07234	0.859793	0.88023	0.722118	0.637989	0.58668	0.582103	0.517047	0.498944	0.570171	0.637597						-0.10358	0.547609	0.946084		Yes
O43314	PPIP5K2	22	15	1	1.01568	0.989866	0.973995	0.893421	0.783893	0.613862	0.4104	0.266095	0.16829	0.123054	0.0947544	0.0767746	0.0675395	0.0766338	0.084847	1	0.99508	0.980089	0.97186	0.881213	0.767093	0.596169	0.396945	0.261062	0.179974	0.122869	0.103601	0.0829602	0.0675913	0.0689108	0.0551005	9.26305	-0.172462	0.0125312	0.997181	9.1712	-0.166718	0	0.998073	Yes	Yes	Yes	Yes
O43318	MAP3K7	14	13	1	1.03591	1.0206	1.02828	0.970725	0.901853	0.780326	0.608613	0.42139	0.29138	0.20832	0.152463	0.104443	0.102468	0.0903349	0.0914367	1	0.975628	0.993413	1.00346	0.978256	0.878662	0.769122	0.596531	0.441841	0.311148	0.220354	0.161081	0.119004	0.102081	0.0875616	0.0712883	10.6176	-0.156749	0.0260097	0.998033	10.6546	-0.14448	0	0.999021	Yes	Yes	Yes	Yes
O43324	EEF1E1	11	17	1	0.948307	0.939822	0.908526	0.864893	0.753494	0.544237	0.339018	0.228765	0.151506	0.105459	0.0736192	0.0442189	0.0345332	0.0245111	0.00905227	1	1.05759	0.934628	0.950825	0.909224	0.764622	0.54076	0.391052	0.25716	0.187447	0.140715	0.0980013	0.0657717	0.0422301	0.039367	0.0367444	8.85821	-0.18463	0	0.992315	9.06505	-0.171342	0	0.995639	Yes	Yes	Yes	Yes
O43325	LYRM1	2	3	1	1.02071	1.03418	0.96567	0.983712	0.844193	0.777487	0.861731	0.691359	0.640689	0.580157	0.607489	0.657231	0.59228	0.601472	0.37712	1	1.00079	1.0298	0.973059	0.961308	0.966322	0.819134	0.794001	0.722226	0.656366	0.628274	0.598427	0.646875	0.626288	0.601661	0.267669	20.5554	-0.0448144	0	0.917807	18.9808	-0.0471829	0	0.897989	Yes	Yes	Yes	Yes
O43347	MSI1	7	9	1	1.00711	0.983784	0.967615	0.934554	0.809303	0.696609	0.481545	0.353754	0.26066	0.214602	0.179358	0.1584	0.124883	0.127116	0.113427	1	1.00192	1.01754	1.01959	0.965951	0.906402	0.697324	0.49511	0.414637	0.298716	0.221305	0.181132	0.153709	0.131752	0.118618	0.0933501	9.89443	-0.146667	0.0524836	0.998137	10.2281	-0.148738	0.0545773	0.998139	Yes	Yes	Yes	Yes
O43353	RIPK2	15	16	1	1.02986	0.994925	1.00972	1.02484	0.945659	0.826923	0.797472	0.69889	0.638856	0.576149	0.542855	0.511436	0.437998	0.353127	0.199841	1	1.04755	1.0193	1.03449	1.02524	0.914687	0.845907	0.713427	0.61511	0.526021	0.463274	0.417253	0.390455	0.364428	0.298803	0.164367	15.059	-0.0676804	0	0.97687	13.2174	-0.0813791	0	0.987992	Yes	Yes	Yes	Yes
O43374	RASA4		1																	1	0.867583	0.772348	1.09401	0.797623	0.762873	0.503718	0.432977	0.324603	0.21911	0.24706	0.141777	0.136554	0.0860641	0.0718453	0.0986091					9.13158	-0.140545	0	0.947572		Yes		Yes
O43379-4	WDR62	10	6	1	1.03873	0.96301	1.01739	0.924809	0.844505	0.701293	0.510767	0.3315	0.229771	0.166406	0.113767	0.0935148	0.0684642	0.0653434	0.0589932	1	0.991596	0.920458	0.997256	0.939265	0.878272	0.683586	0.538977	0.331624	0.218185	0.141855	0.107194	0.0707234	0.0576866	0.0539252	0.041521	9.93548	-0.161042	0	0.997262	9.97896	-0.170386	0	0.995752	Yes	Yes	Yes	Yes
O43390-2	HNRNPR	68	65	1	0.975734	0.967928	0.959815	0.96655	0.891183	0.730638	0.579641	0.443922	0.311305	0.21888	0.143732	0.0867094	0.0684664	0.0646382	0.0658602	1	0.99997	0.983327	0.979424	0.972055	0.875212	0.73641	0.588256	0.441115	0.319155	0.215613	0.148898	0.109445	0.0735166	0.077356	0.0766466	10.5227	-0.149426	0	0.996418	10.5506	-0.145636	0	0.997951	Yes	Yes	Yes	Yes
O43390	HNRNPR	1	4	1	0.938985	0.940591	1.0416	0.910376	0.88414	0.825386	0.580082	0.368899	0.233291	0.135299	0.159702	0.163416	0.127939	0.183157	0	1	1.08094	1.15482	1.1657	1.1267	1.04706	0.873846	0.646233	0.443624	0.357379	0.233984	0.137674	0.047073	0.0721448	0.0430085	0.0800146	10.3833	-0.185143	0.0740581	0.982303	11.0564	-0.176385	0.0183322	0.971181	Yes	Yes	Yes	Yes
O43395	PRPF3	27	28	1	1.02103	0.962759	0.937223	0.847037	0.741813	0.51578	0.306055	0.213012	0.156755	0.132086	0.117186	0.106362	0.0884778	0.0988699	0.111695	1	0.955764	0.979526	0.96178	0.889021	0.759016	0.536015	0.344129	0.22867	0.163241	0.129985	0.108218	0.116735	0.097595	0.129361	0.143908	8.66383	-0.186735	0.0567316	0.994762	8.83349	-0.196173	0.0834196	0.995432	Yes	Yes	Yes	Yes
O43396	TXNL1	49	28	1	1.00894	0.975313	1.00058	0.9966	0.935091	0.845658	0.804841	0.706786	0.646926	0.635364	0.578937	0.532727	0.434665	0.293376	0.101977	1	1.03504	0.986241	1.00303	0.990298	0.946892	0.852669	0.778274	0.6775	0.645031	0.57912	0.525888	0.509472	0.445052	0.318632	0.0923471	15.033	-0.0730766	0	0.945784	14.6605	-0.0733394	0	0.955046	Yes	Yes	Yes	Yes
O43399-3	TPD52L2		1																	1	0.958971	1.00854	1.12596	0.746638	0.824928	0.668842	0.63138	0.538283	0.56081	0.464996	0.457842	0.451615	0.481785	0.550591	0.553852					16.8479	-0.101642	0.470273	0.912896		Yes
O43399-7	TPD52L2	34	29	1	0.974887	0.962761	0.985832	1.01153	0.928825	0.867482	0.82788	0.752761	0.709769	0.722631	0.691426	0.785215	0.667808	0.794503	0.909211	1	1.01555	0.969328	0.996361	1.01057	0.966625	0.937603	0.859532	0.753012	0.699092	0.634566	0.624583	0.662245	0.652165	0.732603	0.731576		-0.0805307	0.754073	0.784456		-0.105287	0.671667	0.955946	Yes	Yes
O43402	EMC8	9	9	1	0.964405	0.969643	0.959399	0.873678	0.782333	0.597163	0.39093	0.265569	0.164377	0.110829	0.0764446	0.0542797	0.0457922	0.0443041	0.036209	1	0.951953	0.970983	0.953812	0.895852	0.778125	0.587145	0.402461	0.279745	0.182007	0.12583	0.0892331	0.0662282	0.046468	0.0489002	0.0403352	9.17216	-0.177288	0	0.996053	9.21104	-0.171079	0	0.99686	Yes	Yes	Yes	Yes
O43414	ERI3	13	13	1	0.967681	0.954577	0.985888	0.930326	0.892608	0.781351	0.661784	0.513207	0.431668	0.344909	0.292398	0.248154	0.191609	0.123256	0.0592255	1	1.07011	1.01709	0.96783	0.995203	0.941953	0.839016	0.706983	0.568269	0.491857	0.425817	0.361349	0.287445	0.226723	0.165902	0.079428	11.4876	-0.111903	0	0.99298	12.3089	-0.103106	0	0.991159	Yes	Yes	Yes	Yes
O43422	PRKRIR	5	8	1	1.05354	1.09225	1.06714	1.00992	0.983084	0.762157	0.508947	0.359462	0.234356	0.163676	0.137737	0.118622	0.106255	0.10594	0.0517009	1	1.01563	1.06416	1.09388	1.00295	0.921519	0.817624	0.520161	0.37357	0.26818	0.192518	0.153792	0.125151	0.106067	0.0778263	0.0926372	10.184	-0.197073	0.0721841	0.992459	10.3452	-0.183104	0.0701541	0.993358	Yes	Yes	Yes	Yes
O43426	SYNJ1	8	7	1	1.04515	1.03367	1.02794	1.01395	0.94662	0.859009	0.724873	0.563669	0.391778	0.257355	0.195905	0.158999	0.137271	0.137827	0.152428	1	0.944836	1.00146	1.02178	0.975364	0.888511	0.810662	0.672695	0.593672	0.425798	0.319799	0.230073	0.206929	0.166661	0.184216	0.198272	11.4905	-0.154818	0.0819655	0.995811	11.5787	-0.120166	0.0634441	0.991402	Yes	Yes	Yes	Yes
O43427	FIBP	10	5	1	1.05902	0.997461	0.966428	0.881827	0.768666	0.59399	0.379334	0.251719	0.153607	0.111256	0.0838952	0.0720804	0.0563002	0.0490556	0.0518886	1	1.04257	0.949672	0.928069	0.89912	0.772331	0.627683	0.445875	0.3108	0.208039	0.175659	0.131775	0.120045	0.10318	0.105306	0.0954855	9.11026	-0.175957	0	0.996464	9.44127	-0.150036	0.0141382	0.99463	Yes	Yes	Yes	Yes
O43432-3	EIF4G3	23	15	1	0.983751	0.995342	0.966599	0.921453	0.870869	0.70745	0.5162	0.352502	0.236695	0.174831	0.128537	0.100154	0.0819866	0.0880107	0.0953059	1	1.03214	0.995215	0.984778	0.895994	0.80187	0.68114	0.503429	0.351091	0.226538	0.165255	0.115682	0.0900489	0.0720264	0.0679147	0.0702777	10.0163	-0.161948	0.0249267	0.997553	9.8042	-0.154241	0	0.996129	Yes	Yes	Yes	Yes
O43439-4	CBFA2T2		1																	1	0.953094	1.09037	1.12485	1.22501	1.19807	0.977472	0.804625	0.511368	0.324924	0.368883	0.150522	0.219774	0.201541	0.147915	0.187044					11.4287	-0.223317	0.183232	0.948832		Yes		Yes
O43447	PPIH	32	27	1	1.02911	1.00509	0.997264	1.01877	0.956058	0.841076	0.782872	0.691892	0.623554	0.606575	0.593995	0.66158	0.555805	0.656693	0.681092	1	1.03967	1.03107	0.984579	0.981699	0.961459	0.863245	0.786964	0.67616	0.597519	0.543404	0.495726	0.516055	0.490138	0.573421	0.538641		-0.099605	0.6183	0.965255		-0.101373	0.503313	0.983879	Yes	Yes
O43462	MBTPS2	1		1	1.10201	0.938311	0.906749	0.881825	0.69124	0.52956	0.405227	0.294105	0.211877	0.0948593	0.0949958	0.0807488	0.0768894	0	0																	8.89369	-0.164204	0	0.986138					Yes		Yes
O43464	HTRA2	9	8	1	0.971506	0.989403	0.983735	0.946175	0.913551	0.861444	0.771408	0.66709	0.614896	0.61737	0.591322	0.618855	0.560839	0.745083	0.897915	1	0.977386	0.964591	1.06001	0.954417	0.953049	0.833078	0.7361	0.651205	0.565037	0.535737	0.476768	0.502044	0.513528	0.633132	0.689379		-0.108389	0.661672	0.769056		-0.122781	0.553933	0.9261	Yes	Yes
O43482	OIP5	2	2	1	0.885836	0.960571	0.932404	0.993448	0.934257	0.822087	0.714299	0.618364	0.55591	0.487245	0.394029	0.340422	0.32119	0.367921	0.306549	1	1.03248	1.14973	1.01772	1.04353	0.932187	0.868402	0.708958	0.540838	0.46913	0.373345	0.355047	0.357617	0.32223	0.327045	0.223541	13.0354	-0.0899908	0.201003	0.977325	11.9465	-0.124534	0.253983	0.979193	Yes	Yes	Yes	Yes
O43488	AKR7A2	20	18	1	0.998561	0.970046	0.991181	0.983425	0.944304	0.866274	0.736622	0.564968	0.400921	0.285105	0.179691	0.0935072	0.0771589	0.0455781	0.0244585	1	0.968841	0.969022	0.972266	0.95616	0.940172	0.827291	0.673364	0.547576	0.435363	0.29852	0.223841	0.136218	0.0960201	0.0471052	0.0302729	11.595	-0.157057	0	0.997108	11.4823	-0.13918	0	0.993576	Yes	Yes	Yes	Yes
O43490	PROM1	16	17	1	1.0146	1.0157	0.96892	0.988983	0.928218	0.873511	0.809179	0.707925	0.689012	0.669823	0.672412	0.63499	0.565864	0.710505	0.783816	1	0.985135	1.04114	1.03157	1.04705	1.00641	0.89684	0.799061	0.733364	0.686704	0.614321	0.594285	0.646091	0.629583	0.768753	0.709731		-0.081936	0.664652	0.912423		-0.108184	0.662022	0.932945	Yes	Yes
O43491-4	EPB41L2		1																	1	0.919326	1.18972	1.03357	0.887088	0.936423	0.851122	0.585112	0.544511	0.326706	0.305644	0.27691	0.186154	0.142531	0.102838	0.0629247					11.242	-0.126467	0	0.969632		Yes		Yes
O43491	EPB41L2		51																	1	1.01719	0.995883	1.02073	0.98497	0.946244	0.873875	0.788696	0.650412	0.535323	0.430536	0.341382	0.257305	0.192604	0.13251	0.074066					12.7016	-0.113699	0	0.996283		Yes		Yes
O43493	TGOLN2	10	5	1	0.971497	0.928217	0.954608	0.948692	0.938506	0.868271	0.819826	0.75167	0.724835	0.68756	0.680965	0.685827	0.610902	0.723787	0.959529	1	0.99728	0.98296	0.813194	1.00433	0.978349	0.870531	0.755603	0.754346	0.679028	0.550439	0.508479	0.611516	0.64456	0.718161	0.720347		-0.0762579	0.722203	0.667231		-0.103958	0.631715	0.808558	Yes	Yes
O43502	RAD51C	7	7	1	1.01861	1.00064	0.986366	0.960962	0.875349	0.721631	0.50494	0.379152	0.247259	0.175485	0.128255	0.0915688	0.0744425	0.0660935	0.0650249	1	1.02394	1.02937	1.06872	0.984313	0.880042	0.751186	0.539147	0.393852	0.266086	0.179858	0.138635	0.101194	0.0839844	0.0684031	0.0652397	10.1211	-0.15874	0	0.99925	10.3136	-0.158626	0.00656929	0.997038	Yes	Yes	Yes	Yes
O43504	LAMTOR5	5	3	1	1.27111	1.28728	1.4171	1.6282	1.27052	1.29641	1.17736	0.831195	0.863933	0.899111	0.917636	0.864657	0.698834	0.891342	1.42798	1	1.19633	1.18016	1.1735	1.38107	1.22349	1.05406	0.897286	0.716631	0.678793	0.483285	0.544656	0.590171	0.516156	0.654665	0.614749		0	1.5	-0.00606461		-0.168807	0.573771	0.759366	Yes	Yes
O43505	B3GNT1	2		1	1.08123	1.31109	1.23301	1.0306	1.07955	0.988875	0.906911	0.774164	0.700032	0.701402	0.566593	0.511762	0.593608	0.827752	0.752145																		-0.127529	0.657977	0.719105					Yes
O43513	MED7	5	8	1	0.94249	0.918753	0.927467	0.906276	0.907774	0.77888	0.681863	0.572877	0.466204	0.376983	0.326786	0.288419	0.246737	0.212986	0.168895	1	1.02897	1.01605	1.0392	0.999996	0.966591	0.823364	0.710949	0.60131	0.469461	0.367039	0.304932	0.259507	0.216327	0.186952	0.124767	11.9863	-0.095256	0	0.987087	12.1568	-0.107918	0.00873001	0.997312	Yes	Yes	Yes	Yes
O43524	FOXO3	6	5	1	1.08109	1.05558	1.04063	1.03712	0.923988	0.884602	0.710844	0.60693	0.49577	0.458066	0.363484	0.314985	0.280766	0.280108	0.288855	1	1.02017	1.08047	0.985939	1.00657	0.928565	0.84509	0.67355	0.513202	0.392198	0.328637	0.252094	0.247664	0.207268	0.229086	0.193871	12.4698	-0.108768	0.207326	0.988217	11.3505	-0.140062	0.162155	0.995223	Yes	Yes	Yes	Yes
O43542	XRCC3	7	6	1	1.01824	0.97188	0.957559	0.929512	0.791436	0.639466	0.389251	0.265832	0.16588	0.119142	0.0934465	0.0681401	0.0538156	0.070329	0.0665769	1	1.01622	0.989244	0.990481	0.939881	0.800767	0.610768	0.422988	0.264789	0.176906	0.103134	0.0712756	0.0468064	0.0401498	0.0540064	0.0292216	9.3217	-0.180735	0.0127605	0.997243	9.34949	-0.182693	0	0.998865	Yes	Yes	Yes	Yes
O43567	RNF13	2	3	1	0.856477	0.805628	0.740411	0.669637	0.66065	0.560978	0.460343	0.454146	0.444637	0.440456	0.40496	0.431668	0.391107	0.499682	0.768063	1	0.891713	0.707821	0.782175	0.707508	0.723694	0.623062	0.496473	0.411412	0.283418	0.267248	0.23776	0.192076	0.19474	0.279241	0.277473	13.2588	-0.108962	0.304828	0.737461	8.90642	-0.104155	0	0.881052	Yes	Yes		Yes
O43572	AKAP10	7	3	1	1.08696	1.04358	0.945402	0.864752	0.818547	0.56291	0.452501	0.283522	0.226469	0.129883	0.137538	0.0611164	0.0607145	0.0501518	0.0432824	1	1.08283	0.981135	1.05747	0.968517	0.880161	0.7379	0.620958	0.403053	0.287644	0.246025	0.1808	0.128135	0.0905204	0.0692777	0.0492903	9.3352	-0.161227	0	0.99112	10.5775	-0.144853	0	0.993683	Yes	Yes	Yes	Yes
O43581-2	SYT7	4	2	1	0.96828	0.949581	0.953518	0.885204	0.75338	0.607596	0.417441	0.273948	0.206969	0.146271	0.124148	0.0995091	0.0763086	0.0744138	0.0772745	1	0.913351	1.05713	1.18963	0.996197	0.770071	0.602229	0.49505	0.31899	0.189404	0.143784	0.104748	0.104368	0.0892428	0.0583174	0.029747	9.24617	-0.155993	0	0.996237	9.57564	-0.163331	0	0.97794	Yes	Yes	Yes	Yes
O43583	DENR	28	11	1	1.02394	1.05029	1.02298	1.00611	1.06356	0.921142	0.844677	0.732841	0.728482	0.722717	0.724153	0.685755	0.596482	0.782084	0.968464	1	0.981755	0.950689	0.996696	0.993288	0.900708	0.853967	0.792366	0.680005	0.645256	0.608999	0.586081	0.639002	0.625813	0.758413	0.768389		-0.114617	0.741678	0.756219		-0.0941824	0.65777	0.884476	Yes	Yes
O43592	XPOT	23	26	1	0.993598	0.976504	0.972001	0.934412	0.824282	0.653705	0.418072	0.284781	0.178123	0.129714	0.0997677	0.0736012	0.0561076	0.0634388	0.0465069	1	1.01191	0.990274	0.99102	0.910176	0.801764	0.609552	0.40586	0.274071	0.171924	0.131041	0.090227	0.0631162	0.0484079	0.0484309	0.0438189	9.50352	-0.17674	0.00496653	0.998744	9.31939	-0.175392	0	0.999028	Yes	Yes	Yes	Yes
O43598	DNPH1	16	12	1	0.987312	1.0225	1.01685	1.03766	0.95953	0.888555	0.786156	0.659407	0.57825	0.528013	0.444353	0.369164	0.30738	0.228317	0.140672	1	0.987734	1.02058	1.02568	0.972207	0.917728	0.86459	0.761917	0.656659	0.581688	0.49132	0.415643	0.398155	0.360515	0.288477	0.133725	13.5987	-0.089223	0	0.992001	13.5584	-0.0826001	0	0.989746	Yes	Yes	Yes	Yes
O43615	TIMM44	26	20	1	0.970605	0.944205	0.93947	0.924602	0.877695	0.69851	0.470117	0.297925	0.164264	0.106772	0.0718594	0.0481195	0.0392502	0.0404792	0.0425526	1	0.996242	0.987303	0.96955	0.978894	0.893356	0.746414	0.521622	0.342486	0.202386	0.136553	0.100387	0.0728363	0.0599588	0.0628476	0.0554629	9.76205	-0.191391	0	0.995257	10.0849	-0.184612	0.0164831	0.999051	Yes	Yes	Yes	Yes
O43617	TRAPPC3	13	11	1	0.976379	0.9668	0.959509	0.972355	0.908122	0.826887	0.751861	0.649143	0.620034	0.57046	0.514973	0.478618	0.376329	0.292064	0.151002	1	1.04385	1.01561	0.962307	1.00948	0.999552	0.892323	0.798104	0.711427	0.615656	0.545952	0.508798	0.476118	0.417007	0.332321	0.147952	14.1977	-0.0731625	0	0.97007	14.6206	-0.0757944	0	0.978249	Yes	Yes	Yes	Yes
O43633	CHMP2A	23	17	1	0.966138	0.948896	0.946739	0.982248	0.968131	0.872028	0.859025	0.788684	0.743753	0.757252	0.735175	0.753266	0.639141	0.685942	0.445463	1	1.01214	0.988256	0.987405	1.00944	0.974777	0.868891	0.767793	0.691606	0.648273	0.581422	0.57066	0.602411	0.57669	0.579422	0.287499		-0.0348361	0	0.890653	17.6782	-0.0510771	0	0.932269	Yes	Yes		Yes
O43639	NCK2	8	9	1	1.01708	1.01439	1.00648	0.998074	0.979595	0.853153	0.828718	0.714322	0.667644	0.618697	0.524446	0.466959	0.370551	0.188397	0.0706686	1	0.982093	1.01	1.00561	0.980498	0.905373	0.853539	0.739902	0.668221	0.582107	0.52423	0.464638	0.420015	0.350804	0.199003	0.108712	14.4922	-0.0879727	0	0.96175	13.5583	-0.08427	0	0.978015	Yes	Yes	Yes	Yes
O43657	TSPAN6	6	4	1	0.982717	0.998523	0.997385	1.04698	0.971681	0.903258	0.917354	0.891727	0.874104	0.926883	0.942719	1.01257	0.869322	1.17642	1.57865	1	0.993105	0.928368	0.964575	0.939245	0.913752	0.936555	0.871892	0.76319	0.751342	0.725554	0.681863	0.734735	0.700303	0.987863	1.06545		0.0120898	1.00922	0.00116297		-0.0596254	0.804879	0.315823	Yes	Yes
O43660	PLRG1	13	8	1	0.937246	0.904144	0.953432	0.835368	0.791752	0.668949	0.529192	0.437748	0.319878	0.23746	0.197279	0.201549	0.166875	0.144631	0.149245	1	0.945665	0.879451	0.948086	0.896227	0.840562	0.662696	0.505945	0.440783	0.323497	0.222866	0.183456	0.170329	0.141546	0.146611	0.143658	10.1006	-0.11621	0	0.985668	10.1645	-0.125325	0.0144747	0.985516	Yes	Yes	Yes	Yes
O43663	PRC1	21	14	1	1.01366	0.945429	0.968607	0.837241	0.704807	0.528487	0.332777	0.220552	0.137287	0.102587	0.0854722	0.0680483	0.0618028	0.0657736	0.0796407	1	1.02723	0.956169	0.981797	0.865815	0.713071	0.540451	0.362319	0.215264	0.132661	0.0951703	0.0681892	0.0602735	0.0479251	0.0601629	0.0637379	8.66984	-0.173598	0	0.995593	8.78757	-0.179549	0	0.996304	Yes	Yes	Yes	Yes
O43665-3	RGS10	17	9	1	1.03635	1.02381	1.04392	1.1042	1.0178	0.936188	0.922731	0.816088	0.774698	0.783057	0.740917	0.703831	0.633497	0.6395	0.493235	1	0.944518	1.05082	1.02325	1.05185	1.016	0.899692	0.819023	0.725161	0.671722	0.591744	0.583187	0.599847	0.614951	0.605881	0.330532		-0.0394708	0	0.943766	19.4403	-0.0609292	0.378262	0.921427	Yes	Yes
O43670-2	ZNF207	1	1	1	0.893767	0.719444	0.96895	0.730386	0.697155	0.750235	0.753951	0.784141	0.574463	0.52453	0.609491	0.817486	0.647651	0.707005	0.836973	1	1.1824	0.975461	1.03174	0.720809	0.864612	0.816878	0.701857	0.780303	0.503836	0.334568	0.282553	0.50772	0.25164	0.440888	0.448669		-0.26152	0.699968	0.26557	13.308	-0.0744896	0.151116	0.830103	Yes	Yes		Yes
O43670-4	ZNF207	18	8	1	0.98287	0.969651	1.04068	1.00075	0.992693	0.924482	0.855897	0.757868	0.705467	0.658367	0.674156	0.680277	0.600723	0.703534	0.870884	1	1.01098	1.02211	1.08941	1.01278	0.955918	0.872086	0.783123	0.697356	0.656535	0.574878	0.563012	0.617493	0.635332	0.709474	0.677488		-0.100382	0.696166	0.864595		-0.106456	0.628523	0.944221	Yes	Yes
O43674	NDUFB5	8	4	1	0.95566	0.973014	0.938148	0.942377	0.886613	0.727862	0.494473	0.363301	0.255147	0.175734	0.119006	0.0813837	0.0665522	0.0577993	0.053831	1	1.03352	0.971186	0.9132	0.95488	0.857598	0.698257	0.499347	0.396635	0.267282	0.190063	0.142101	0.0843019	0.0535598	0.0449389	0.034144	10.0941	-0.162362	0	0.996339	10.0801	-0.155691	0	0.994304	Yes	Yes	Yes	Yes
O43676	NDUFB3	7	6	1	1.02398	1.00629	0.987185	1.0436	0.967688	0.851056	0.766736	0.621071	0.530238	0.434096	0.340135	0.315854	0.24466	0.181505	0.126529	1	1.04332	1.05773	1.00935	1.0014	0.957912	0.892873	0.782154	0.645484	0.531651	0.459849	0.367182	0.302646	0.243628	0.19904	0.0931636	12.7477	-0.101378	0	0.995769	12.9411	-0.102669	0	0.99442	Yes	Yes	Yes	Yes
O43677	NDUFC1	1		1	1.14571	1.1424	1.08057	1.48777	1.21522	1.15114	1.23493	0.832972	1.1608	1.12227	1.16953	1.25418	1.25727	1.49085	2.11073																		0.11823	1.5	0.258265					Yes
O43678	NDUFA2	10	10	1	0.981397	1.03326	0.993616	0.983333	0.900239	0.765057	0.655741	0.557933	0.499988	0.519633	0.485769	0.498066	0.429125	0.426431	0.379463	1	0.961211	0.960745	0.97499	0.966835	0.790563	0.766289	0.665358	0.515449	0.452057	0.452819	0.443876	0.403492	0.421779	0.37527	0.314535	13.2498	-0.0994134	0.395888	0.990998	12.3484	-0.0904625	0.272997	0.984243	Yes	Yes		Yes
O43681	ASNA1	26	21	1	1.00887	1.00135	0.981312	0.991736	0.931269	0.825012	0.671218	0.508077	0.406501	0.327957	0.246608	0.181136	0.146711	0.0929962	0.0596798	1	0.99702	0.989123	0.988883	1.00795	0.923715	0.806993	0.648163	0.515299	0.406207	0.316363	0.247204	0.197245	0.141933	0.0860675	0.0603913	11.4554	-0.127302	0	0.998371	11.379	-0.1261	0	0.9978	Yes	Yes	Yes	Yes
O43683	BUB1	12	11	1	0.951283	1.03533	0.909782	0.825788	0.754978	0.544851	0.377909	0.241892	0.1537	0.0919207	0.065319	0.0486664	0.0414865	0.0441911	0.0380059	1	1.01388	1.08454	1.02896	0.942814	0.841375	0.721293	0.502093	0.372206	0.247047	0.189215	0.148025	0.117048	0.117902	0.132169	0.126298	8.87605	-0.176811	0	0.991001	10.008	-0.161281	0.0646834	0.994188	Yes	Yes	Yes	Yes
O43684	BUB3	25	26	1	1.0111	0.991633	0.982995	0.987082	0.955167	0.837733	0.787358	0.683576	0.612123	0.558608	0.512596	0.473119	0.38466	0.303862	0.14494	1	1.02019	0.95106	0.98665	0.977691	0.902206	0.832133	0.786273	0.633225	0.577039	0.501423	0.444856	0.42637	0.356291	0.252341	0.0829928	14.3544	-0.0753805	0	0.979217	13.4977	-0.0836582	0	0.974755	Yes	Yes	Yes	Yes
O43688-2	PPAP2C	4	5	1	1.01152	1.14785	1.06396	0.981827	0.947163	0.851105	0.79294	0.733932	0.624869	0.626426	0.766013	0.636738	0.557583	0.628803	0.558184	1	1.02918	1.16384	1.22326	1.03273	0.966809	0.907786	0.822058	0.719524	0.683359	0.624882	0.69677	0.596951	0.552989	0.652263	0.475223		-0.0638001	0.571365	0.906728		-0.0645704	0.52134	0.870131	Yes	Yes
O43707	ACTN4	126	124	1	1.00231	1.02464	1.00644	1.00854	0.958899	0.887031	0.864499	0.767316	0.743039	0.73539	0.730553	0.764949	0.677856	0.720494	0.159119	1	0.987644	0.994845	1.01237	0.981365	0.939572	0.899575	0.836926	0.755995	0.687609	0.647703	0.636066	0.659112	0.637615	0.657581	0.139379	20.381	-0.0457038	0	0.748194	18.4002	-0.0505015	0	0.823978	Yes	Yes		Yes
O43708	GSTZ1	9		1	0.968147	0.970262	0.981697	0.931563	0.89425	0.724046	0.580873	0.469064	0.353934	0.291485	0.250782	0.210402	0.178896	0.13811	0.117541																	10.8426	-0.117359	0.00855858	0.997818					Yes		Yes
O43709	WBSCR22	7	6	1	1.03292	0.954968	0.933328	0.87721	0.824123	0.68887	0.485271	0.386504	0.286007	0.224997	0.200981	0.196302	0.146637	0.105797	0.0722333	1	1.04362	1.07557	1.06221	1.00001	0.92577	0.73675	0.549084	0.381033	0.293873	0.205869	0.157871	0.121359	0.102531	0.0492533	0.0350839	10.0233	-0.128358	0	0.993458	10.4137	-0.154017	0	0.994441	Yes	Yes	Yes	Yes
O43715	TRIAP1	3	4	1	1.09755	1.11494	1.14969	1.08331	1.0492	0.968119	0.970712	0.838706	0.799912	0.785705	0.829085	0.913728	0.802288	1.04818	1.19553	1	0.913629	1.04237	1.14676	1.03615	1.01274	0.745135	0.815834	0.701644	0.569599	0.563764	0.54905	0.564429	0.499313	0.629474	0.740464		-0.562217	0.901641	0.254484		-0.105732	0.585399	0.859283	Yes	Yes
O43716	GATC	9	7	1	1.03275	1.09446	1.09935	0.989271	1.0317	0.936815	0.836831	0.775445	0.714729	0.709618	0.684533	0.685939	0.587737	0.738581	0.787483	1	1.10817	1.03627	1.10425	1.05419	1.03595	0.949225	0.864442	0.727738	0.66393	0.524635	0.488145	0.468654	0.438497	0.46047	0.394706		-0.0936843	0.696535	0.894002	14.8469	-0.102543	0.395146	0.97134	Yes	Yes
O43719	HTATSF1	62	43	1	0.977179	0.972711	0.982709	0.96898	0.915778	0.838761	0.819124	0.726644	0.675054	0.640153	0.594833	0.598366	0.491735	0.313066	0.101144	1	1.01563	0.983684	1.002	0.999731	0.956634	0.873734	0.837189	0.737515	0.656676	0.618773	0.533341	0.510285	0.435702	0.28141	0.0674738	15.5683	-0.068648	0	0.916825	14.9092	-0.0801602	0	0.95657	Yes	Yes	Yes	Yes
O43731-2	KDELR3		1																	1	0.963746	0.871905	0.854866	0.768377	0.7343	0.764893	0.444799	0.332993	0.287491	0.252228	0.176788	0.145429	0.113417	0.0575281	0.0120963					9.64042	-0.132291	0	0.951566		Yes		Yes
O43734	TRAF3IP2	2		1	1.03538	1.15704	1.06647	0.930931	0.836581	0.744906	0.608082	0.446704	0.396393	0.363669	0.340595	0.360987	0.283854	0.259022	0.220216																	11.0725	-0.111764	0.187588	0.975907					Yes		Yes
O43741	PRKAB2	6	3	1	1.0377	1.02931	1.06184	1.05655	0.981831	0.826796	0.599615	0.407079	0.283614	0.208129	0.145221	0.122788	0.113019	0.0962444	0.0815254	1	1.04032	0.972048	0.936815	0.983926	0.834033	0.758081	0.532801	0.379482	0.277961	0.203624	0.175935	0.141486	0.100314	0.0713813	0.0785169	10.6459	-0.184047	0.0708978	0.995756	10.2877	-0.145789	0.00576412	0.995236	Yes	Yes	Yes	Yes
O43747-2	AP1G1	46	41	1	0.991675	1.00328	0.991357	1.01451	0.973951	0.874902	0.782488	0.660725	0.555579	0.475568	0.340206	0.212654	0.149036	0.058072	0.041252	1	1.02753	1.02024	0.985721	1.00531	0.969767	0.86577	0.719819	0.637673	0.525733	0.436346	0.352501	0.257213	0.15553	0.0520761	0.0413529	12.7402	-0.124726	0	0.988109	12.4705	-0.118289	0	0.985968	Yes	Yes	Yes	Yes
O43752	STX6	14	15	1	1.06576	1.01671	1.05916	1.06078	0.972713	0.889404	0.823731	0.69421	0.684221	0.677903	0.607266	0.607676	0.50285	0.587754	0.575928	1	1.00964	1.06903	1.01309	0.986346	1.00988	0.886561	0.768319	0.698302	0.596497	0.507241	0.486741	0.482102	0.484346	0.471905	0.431183		-0.0732421	0.542393	0.963118	14.9968	-0.0989199	0.428656	0.989589	Yes	Yes
O43759-2	SYNGR1	2		1	1.03275	1.12401	1.0756	1.09825	0.998843	0.927201	0.887027	0.725183	0.7497	0.691947	0.669097	0.676098	0.674585	0.859688	0.998526																		-0.111494	0.755208	0.683191					Yes
O43759-3	SYNGR1		1																	1	1.25429	1.01818	1.01636	1.04257	1.0065	0.890156	0.828325	0.524717	0.422106	0.340828	0.39375	0.302468	0.196936	0.34815	0.325739					11.6588	-0.188425	0.29759	0.949875		Yes		Yes
O43760	SYNGR2	5	6	1	1.07369	1.08764	1.07232	1.10293	1.10861	0.981521	1.03922	0.865391	0.931754	0.984739	1.06947	1.18149	1.05087	1.3814	1.90142	1	1.18684	1.07988	0.995168	1.12551	1.12373	1.03259	0.962534	0.846725	0.893513	0.872837	0.8806	0.994192	0.957547	1.27751	1.43995		0.329959	1.5	0.690239		0	1.43995	0.630876	Yes	Yes
O43761	SYNGR3	1		1	0.956981	0.972026	1.09495	0.832881	0.840198	0.630522	0.558515	0.449202	0.344296	0.370669	0.248397	0.284446	0.233024	0.222532	0.303451																	10.3376	-0.119321	0.176775	0.974973					Yes		Yes
O43765	SGTA	36	37	1	0.999215	0.995712	1.00392	0.992944	0.975105	0.868161	0.852731	0.764535	0.765397	0.759551	0.780467	0.792652	0.704044	0.908355	1.13877	1	1.01111	0.980064	0.999706	1.02816	1.01029	0.917178	0.837114	0.762741	0.725186	0.665092	0.645405	0.715555	0.70898	0.865127	0.940424		-0.103915	0.828968	0.422953		-0.107966	0.752867	0.746717	Yes	Yes
O43766	LIAS	11	9	1	0.98513	0.97605	0.980549	0.950564	0.886418	0.764395	0.683769	0.571046	0.510126	0.493004	0.472765	0.48083	0.41851	0.441058	0.420003	1	0.992017	0.9856	1.00567	0.938802	0.885857	0.75506	0.647227	0.578798	0.495462	0.426024	0.411797	0.402993	0.401123	0.447316	0.358558	13.499	-0.0938194	0.386079	0.995829	12.4195	-0.100733	0.340253	0.993374	Yes	Yes
O43768-3	ENSA	21	19	1	0.99369	0.982016	0.978574	0.993415	0.937443	0.86079	0.85892	0.772365	0.742299	0.747753	0.727856	0.81497	0.699536	0.905426	1.14686	1	0.992541	0.959663	0.994272	0.991685	0.983568	0.893768	0.819276	0.743452	0.703124	0.645754	0.633693	0.701433	0.688467	0.849648	0.99817		-0.0852932	0.823283	0.373028		-0.111767	0.74614	0.650472	Yes	Yes
O43772	SLC25A20	10	5	1	0.991967	0.977862	0.953368	0.925124	0.863847	0.704312	0.483774	0.337183	0.218289	0.155231	0.113396	0.0682918	0.0692031	0.0572151	0.0446287	1	1.02264	1.005	1.03777	0.953498	0.838897	0.713663	0.535894	0.386484	0.290536	0.232197	0.174137	0.130279	0.105296	0.107127	0.0963971	9.90178	-0.167253	0	0.997764	10.2415	-0.140222	0.0121528	0.998252	Yes	Yes	Yes	Yes
O43776	NARS	36	41	1	1.0066	0.976314	0.96847	0.979728	0.90064	0.749041	0.518256	0.312247	0.178341	0.127871	0.0935524	0.0711128	0.0638334	0.0634853	0.0552811	1	0.957208	0.926768	0.950784	0.985913	0.877332	0.82882	0.599087	0.365363	0.21784	0.147681	0.110448	0.078748	0.0645612	0.0670027	0.0711941	10.013	-0.19939	0.0288054	0.998817	10.4279	-0.193729	0.0324895	0.993157	Yes	Yes	Yes	Yes
O43795	MYO1B	44	45	1	0.988027	0.977256	0.939255	0.877632	0.733209	0.552071	0.325589	0.203242	0.123473	0.0750144	0.0551071	0.0542216	0.0431201	0.0462061	0.0393847	1	0.992042	0.95472	0.930511	0.862981	0.721881	0.550321	0.345364	0.219898	0.140886	0.0876574	0.0653551	0.0628656	0.0477355	0.0512166	0.0551691	8.79395	-0.19151	0	0.99646	8.79231	-0.180302	0	0.995244	Yes	Yes	Yes	Yes
O43805	SSNA1	6	6	1	1.0651	1.0982	1.11127	1.10264	1.04241	0.977942	0.891949	0.772762	0.717314	0.725183	0.7415	0.772625	0.660419	0.809655	1.07082	1	1.06759	1.01879	0.966528	0.990818	1.00972	0.93467	0.871407	0.797377	0.708526	0.65638	0.667581	0.755442	0.692443	0.886759	1.02753		-1.06451	0.783785	0.634873		-0.100294	0.772703	0.609361	Yes	Yes
O43808	SLC25A17	2	1	1	1.04117	0.97464	1.10449	0.930533	0.808626	0.669533	0.42046	0.306225	0.1913	0.137436	0.118458	0.0979417	0.0764189	0.0877222	0.0966268	1	0.973945	0.902648	0.931273	0.893914	0.822714	0.699204	0.659188	0.401453	0.371025	0.411951	0.330837	0.306228	0.293171	0.230176	0.178625	9.53195	-0.177446	0.0410859	0.992348	11.1753	-0.0921295	0	0.975386	Yes	Yes	Yes	Yes
O43809	NUDT21	17	23	1	0.970842	0.974443	0.966292	0.942398	0.866016	0.726302	0.634053	0.551403	0.497274	0.463071	0.433861	0.412869	0.35407	0.319604	0.241961	1	0.965738	0.973069	0.96154	0.93891	0.864526	0.754105	0.628414	0.488602	0.426558	0.392235	0.343832	0.344311	0.324675	0.287414	0.179456	12.6855	-0.0757566	0.0147013	0.992935	11.6097	-0.0962134	0.111713	0.991802	Yes	Yes	Yes	Yes
O43813	LANCL1	14	18	1	0.975841	1.01555	0.99585	0.977363	0.935496	0.877259	0.785286	0.687471	0.618209	0.574406	0.550507	0.543963	0.463776	0.427334	0.262403	1	0.974951	1.03199	1.02734	0.976981	0.935354	0.823043	0.696449	0.635313	0.574679	0.497395	0.471256	0.480545	0.438469	0.414279	0.226633	15.68	-0.0610038	0	0.98185	14.2524	-0.0685077	0.0448383	0.978294	Yes	Yes	Yes	Yes
O43815	STRN	25	27	1	1.00747	1.03225	1.03319	1.00553	0.960629	0.830966	0.706194	0.548729	0.432869	0.323202	0.244687	0.183605	0.150745	0.126773	0.126585	1	1.02992	1.02292	1.02725	0.994944	0.919082	0.843467	0.707915	0.558149	0.41729	0.311705	0.212519	0.140864	0.0984983	0.0673148	0.0559572	11.6815	-0.127385	0.0240936	0.997958	11.5842	-0.139283	0	0.996665	Yes	Yes	Yes	Yes
O43818	RRP9	8	6	1	1.02004	0.977838	0.957723	0.889619	0.839618	0.70575	0.581926	0.440302	0.328477	0.284121	0.266108	0.275568	0.230778	0.238188	0.239854	1	0.936996	0.839475	0.946242	0.842964	0.786843	0.75133	0.569135	0.468835	0.392065	0.314022	0.277148	0.294987	0.254192	0.271303	0.280188	10.4815	-0.124524	0.157802	0.992939	10.8175	-0.0995071	0.0935099	0.960896	Yes	Yes	Yes	Yes
O43819	SCO2	7	5	1	0.935686	0.96758	0.995086	0.873874	0.802987	0.59583	0.405605	0.275666	0.176574	0.142517	0.0849841	0.0534084	0.0559887	0.0655418	0.0541874	1	1.08992	1.02702	0.991339	0.918125	0.825955	0.635635	0.465871	0.30277	0.198239	0.13572	0.0914079	0.059345	0.0458779	0.0491668	0.063808	9.26763	-0.170768	0	0.995166	9.58049	-0.170608	0	0.99498	Yes	Yes	Yes	Yes
O43823	AKAP8	9	9	1	1.01536	1.02588	1.01978	0.972886	0.875052	0.697364	0.499707	0.366525	0.24166	0.183491	0.143676	0.119	0.0954738	0.135162	0.0962641	1	1.02885	1.114	1.03554	0.950509	0.922881	0.737537	0.497693	0.414416	0.284494	0.2165	0.172223	0.153651	0.130684	0.150134	0.1412	9.99233	-0.166977	0.060154	0.998495	10.2263	-0.165417	0.102245	0.991349	Yes	Yes	Yes	Yes
O43824	GTPBP6	11	7	1	1.01165	1.01053	0.938499	0.888648	0.75216	0.561076	0.342982	0.222336	0.159826	0.113945	0.0988782	0.0859959	0.0631079	0.073403	0.0686444	1	0.938218	0.972301	0.90541	0.833507	0.688883	0.502347	0.310224	0.186204	0.122375	0.089672	0.0542036	0.0538766	0.0286695	0.0382023	0.0479858	8.91602	-0.180706	0.0193595	0.997414	8.49116	-0.186332	0	0.992748	Yes	Yes	Yes	Yes
O43826-2	SLC37A4	2	3	1	1.03878	1.02507	1.00707	0.928614	0.771108	0.602293	0.436904	0.32126	0.172486	0.118123	0.111138	0.0638107	0.0644578	0.0393605	0	1	1.02135	0.844123	1.02311	0.985007	0.731379	0.630749	0.465404	0.318548	0.22366	0.160208	0.11076	0.0849736	0.0773611	0.0728036	0.0582811	9.36935	-0.169849	0	0.996411	9.51789	-0.156491	0	0.984965	Yes	Yes	Yes	Yes
O43837	IDH3B	38	32	1	0.962172	0.968614	0.951301	0.925607	0.827782	0.680831	0.475088	0.361119	0.285663	0.237614	0.208098	0.179998	0.152861	0.123041	0.0719961	1	0.987155	0.960025	0.946939	0.892201	0.791393	0.636968	0.48954	0.384236	0.292812	0.258476	0.212849	0.210531	0.172965	0.146383	0.0676509	9.98776	-0.134294	0.0245921	0.996251	9.92751	-0.121503	0	0.996396	Yes	Yes	Yes	Yes
O43847-2	NRD1	49	34	1	1.00278	0.995211	0.992925	0.998507	0.944312	0.794061	0.569844	0.381714	0.245746	0.168927	0.119973	0.0766527	0.0675309	0.0548206	0.0382181	1	0.998712	1.01602	0.986625	0.979112	0.938809	0.786391	0.580936	0.388572	0.264961	0.184353	0.125361	0.0864098	0.0648248	0.0460831	0.0389792	10.4449	-0.179607	0.0122056	0.999872	10.5055	-0.169534	0	0.999706	Yes	Yes	Yes	Yes
O43852-3	CALU	36	31	1	0.984308	0.983424	1.00258	0.96818	0.875737	0.716929	0.534728	0.385939	0.260192	0.176169	0.11966	0.0982318	0.0792931	0.0795175	0.0690006	1	1.01784	1.0052	1.01781	0.958467	0.874292	0.695159	0.533528	0.371741	0.248297	0.174846	0.125252	0.106395	0.087184	0.0897293	0.0933374	10.1981	-0.156572	0.00136617	0.999132	10.0904	-0.160022	0.0244818	0.998627	Yes	Yes	Yes	Yes
O43852-4	CALU	5	3	1	0.976763	0.970102	0.953746	0.929278	0.856991	0.716286	0.512988	0.395729	0.279439	0.203314	0.138539	0.105189	0.0832521	0.0661399	0.0601315	1	0.996848	0.975124	0.931234	0.974517	0.883932	0.731466	0.582953	0.427338	0.296594	0.221323	0.161962	0.109464	0.116361	0.079534	0.0604641	10.1647	-0.148849	0	0.997204	10.5068	-0.144167	0	0.997109	Yes	Yes	Yes	Yes
O43861	ATP9B	1	2	1	1.24	1.09549	0.969097	1.19109	0.863778	0.734848	0.582432	0.438943	0.42269	0.385529	0.34889	0.343684	0.402916	0.378331	0.429764	1	1.07798	1.09812	0.991244	1.00405	0.781721	0.686536	0.375422	0.225908	0.147069	0.114553	0.0948687	0.0890136	0.0797319	0.37348	0.0989344	10.5458	-0.173308	0.373923	0.927707	9.27734	-0.234514	0.121897	0.960911	Yes	Yes		Yes
O43865	AHCYL1	16	14	1	0.998807	1.03087	0.994272	1.00834	0.9793	0.848048	0.69224	0.545621	0.361384	0.250362	0.168453	0.105959	0.0799911	0.0589629	0.0419051	1	1.08357	1.03913	1.0413	1.01739	0.969914	0.865992	0.705616	0.568029	0.428559	0.291575	0.219867	0.138158	0.0970236	0.0521143	0.0514354	11.3617	-0.156755	0	0.998459	11.6606	-0.144416	0	0.993923	Yes	Yes	Yes	Yes
O43896	KIF1C	17	11	1	0.991203	1.03314	1.01936	0.945953	0.826413	0.635934	0.407193	0.26729	0.177058	0.124704	0.108763	0.0758883	0.082679	0.0776291	0.0705692	1	0.965189	0.94041	0.976288	0.884309	0.79154	0.555323	0.371762	0.25647	0.155684	0.116101	0.0781885	0.063925	0.0516264	0.0523862	0.0565145	9.40712	-0.188884	0.0382819	0.998784	9.07078	-0.177834	0	0.996347	Yes	Yes	Yes	Yes
O43909	EXTL3	10	10	1	1.03013	1.01872	0.998818	0.943176	0.835701	0.68371	0.491535	0.346161	0.25105	0.185598	0.153408	0.119163	0.102552	0.0940011	0.085551	1	1.09477	1.01601	1.03274	0.972301	0.84758	0.710297	0.494184	0.397164	0.285839	0.226108	0.185223	0.158741	0.128826	0.130455	0.125208	9.90396	-0.153473	0.0251105	0.999065	10.1215	-0.149169	0.0698754	0.994537	Yes	Yes	Yes	Yes
O43913	ORC5	11	8	1	0.95755	0.944189	0.906182	0.841775	0.71177	0.510214	0.267991	0.162295	0.104965	0.072666	0.0609279	0.0495415	0.0437094	0.0457716	0.0401974	1	1.01615	0.966397	0.910071	0.882011	0.698062	0.492749	0.30305	0.185571	0.10104	0.07533	0.0501043	0.0516881	0.0364475	0.0499615	0.0472283	8.50352	-0.19715	0	0.991826	8.54627	-0.195333	0	0.995782	Yes	Yes	Yes	Yes
O43920	NDUFS5	9	8	1	1.01616	1.01954	1.02825	0.952843	0.887576	0.687708	0.542418	0.403437	0.298755	0.221019	0.177524	0.158796	0.141954	0.142795	0.126518	1	0.935292	0.971252	1.00921	0.898204	0.822504	0.673916	0.509211	0.367148	0.259189	0.201947	0.161531	0.124792	0.10324	0.11672	0.109967	10.2406	-0.147796	0.0717552	0.998389	9.93254	-0.141845	0.0149196	0.99518	Yes	Yes	Yes	Yes
O43924	PDE6D	6	5	1	0.985305	0.972379	0.965514	0.950823	0.918266	0.843478	0.825618	0.761831	0.78146	0.776989	0.769873	0.821693	0.724633	0.967598	1.18842	1	1.00874	0.976532	0.931355	0.935094	0.914817	0.897703	0.855738	0.777336	0.674307	0.645796	0.676436	0.716636	0.670573	0.812801	0.851636		-0.0699842	0.846383	0.235563		-0.0706339	0.720907	0.762082	Yes	Yes
O43929	ORC4	13	13	1	0.998033	1.00467	0.987431	0.929082	0.806007	0.614718	0.405726	0.284523	0.205844	0.168269	0.143495	0.160864	0.133649	0.148697	0.168508	1	0.975197	0.955615	0.922138	0.867404	0.752597	0.560068	0.374417	0.262551	0.170352	0.126808	0.103841	0.0790299	0.0789586	0.0736857	0.0749141	9.28938	-0.187655	0.117409	0.99794	8.99167	-0.163558	0	0.995351	Yes	Yes	Yes	Yes
O43933	PEX1	10	11	1	1.01992	0.982424	0.934933	0.91064	0.805533	0.614514	0.409441	0.304451	0.225613	0.182771	0.172486	0.135325	0.112581	0.130268	0.138858	1	0.9648	0.972759	0.9353	0.884986	0.721627	0.553126	0.340944	0.240084	0.152885	0.108234	0.0788594	0.0626829	0.0457111	0.0582925	0.0647966	9.3733	-0.16623	0.0825669	0.996599	8.84773	-0.17591	0	0.996469	Yes	Yes	Yes	Yes
O60216	RAD21	23	16	1	0.994493	0.983472	0.988342	0.953974	0.89971	0.738782	0.50204	0.351587	0.211768	0.133542	0.0972417	0.0769677	0.0679801	0.0740418	0.0738276	1	0.969085	0.959168	0.994382	0.956837	0.890001	0.715306	0.480561	0.324672	0.181401	0.0978226	0.0683478	0.048915	0.0388613	0.0409872	0.0504626	10.0396	-0.184244	0.0272524	0.998622	9.88307	-0.191721	0	0.997728	Yes	Yes	Yes	Yes
O60220	TIMM8A	7	8	1	1.12744	1.14058	1.13596	1.11886	1.02011	0.962659	0.906668	0.668898	0.720905	0.681091	0.658796	0.662671	0.656017	0.817407	1.05792	1	1.09214	1.2992	1.62115	1.23147	1.1085	0.996883	0.852272	0.698952	0.681513	0.597332	0.546108	0.550324	0.616012	0.683968	0.890607		-1.61848	0.740463	0.645159		-0.182948	0.651702	0.561523	Yes	Yes
O60229-4	KALRN		3																	1	1.09137	0.981473	1.00322	0.905033	0.825961	0.74981	0.578971	0.505217	0.465689	0.338432	0.31785	0.385635	0.334738	0.332812	0.378042					11.1756	-0.113366	0.287122	0.980353		Yes		Yes
O60229	KALRN	2		1	1.02967	1.03505	0.925018	0.967708	0.948909	0.835306	0.66327	0.463412	0.309414	0.208134	0.169604	0.129987	0.114595	0.0908189	0																	11.0086	-0.155732	0	0.994995					Yes		Yes
O60231	DHX16	31	26	1	0.985377	0.999009	0.98791	0.953229	0.874787	0.702347	0.468665	0.33035	0.200153	0.133496	0.0997821	0.079421	0.0680559	0.0644526	0.0402426	1	0.996485	0.962088	0.956908	0.939222	0.832166	0.695631	0.494794	0.323281	0.20779	0.139101	0.101153	0.0847026	0.0679011	0.0703749	0.0619919	9.8541	-0.177068	0.00838064	0.999311	9.82875	-0.166161	0	0.997124	Yes	Yes	Yes	Yes
O60232	SSSCA1	21	16	1	0.979557	1.02481	1.01118	1.01565	0.967123	0.880945	0.829318	0.715001	0.642048	0.618859	0.624813	0.648529	0.548636	0.640656	0.71514	1	1.04618	1.05251	1.05642	1.08801	0.988386	0.892103	0.78164	0.68093	0.582682	0.506363	0.45766	0.524267	0.471139	0.558526	0.489535		-0.0958807	0.62334	0.956547	16.9129	-0.11759	0.484886	0.971301	Yes	Yes
O60234	GMFG		1																	1	0.977935	1.02823	1.07764	0.910331	0.964999	0.872297	0.831703	0.754564	0.562477	0.668015	0.583423	0.664484	0.572597	0.55286	0.370387					19.0006	-0.0471623	0	0.91953		Yes		Yes
O60239	SH3BP5	4	6	1	1.00821	1.0578	1.121	0.959154	0.938579	0.785477	0.74361	0.647491	0.599765	0.56365	0.526573	0.545067	0.428946	0.501897	0.611044	1	1.01605	1.04792	1.0014	0.893939	0.86616	0.751747	0.556319	0.474973	0.366186	0.331887	0.319496	0.269928	0.257996	0.323266	0.306785		-0.0910355	0.498858	0.94776	10.6837	-0.132412	0.245087	0.98953	Yes	Yes		Yes
O60243	HS6ST1	2	2	1	1.03178	1.19319	1.04386	0.983818	0.866306	0.732103	0.503849	0.344869	0.259511	0.201981	0.107631	0.175803	0.000142603	0	8.79246e-05	1	0.886406	0.882235	0.848585	0.79425	0.71005	0.568556	0.467405	0.380029	0.221831	0.162217	0.148013	0.122636	0.0944946	0.0978784	0	10.1122	-0.16559	0	0.979152	9.07968	-0.138107	0	0.964379	Yes	Yes	Yes	Yes
O60244	MED14	24	31	1	1.03188	1.03086	0.985743	0.917358	0.808415	0.638687	0.410312	0.290596	0.195573	0.143834	0.121611	0.105898	0.0954731	0.105447	0.090335	1	1.00841	0.982032	0.979677	0.926255	0.780907	0.585866	0.395301	0.25933	0.169905	0.119654	0.0866676	0.063349	0.0563562	0.0534474	0.0471727	9.41076	-0.175004	0.048287	0.997726	9.20366	-0.176281	0	0.999405	Yes	Yes	Yes	Yes
O60256	PRPSAP2	19	20	1	1.01107	0.988471	1.00988	0.978502	0.930006	0.822946	0.786862	0.69584	0.662665	0.641708	0.672579	0.746288	0.657639	0.757031	0.793427	1	0.998255	0.979897	0.956134	0.990363	0.924282	0.841274	0.790535	0.682696	0.61356	0.582759	0.545264	0.573958	0.554593	0.683882	0.639413		-0.0998432	0.703371	0.915937		-0.0939258	0.584616	0.951608	Yes	Yes
O60262	GNG7	1		1	1.10264	1.24513	1.27066	1.61713	1.14242	0.952428	0.844493	0.687709	0.760071	0.746486	0.760656	0.646733	0.545871	0.695802	0.759729																		-0.138456	0.696198	0.525737					Yes
O60264	SMARCA5	26	28	1	0.956057	0.933555	0.916755	0.868916	0.722988	0.512626	0.287818	0.187578	0.117438	0.0856342	0.0646078	0.0680322	0.051955	0.064194	0.0655104	1	0.998912	0.947698	0.964896	0.871725	0.71129	0.518077	0.303278	0.192751	0.119706	0.111893	0.0699306	0.0791489	0.068907	0.0753805	0.080654	8.60616	-0.194745	0.0124235	0.99284	8.62165	-0.193488	0.0281173	0.996317	Yes	Yes	Yes	Yes
O60266	ADCY3	7	4	1	1.02801	1.09915	1.0687	0.971586	0.948601	0.783383	0.587886	0.42961	0.315094	0.237686	0.177158	0.148816	0.120973	0.127052	0.147919	1	1.03512	1.03926	0.963239	0.994369	0.870015	0.779514	0.581229	0.374344	0.251934	0.153974	0.123268	0.0932396	0.0714699	0.0381516	0.0454924	10.6344	-0.161922	0.0895555	0.992413	10.3792	-0.168708	0	0.996912	Yes	Yes	Yes	Yes
O60271-2	SPAG9	1		1	0.924523	0.965201	0.933195	0.993725	0.864698	0.911685	0.872781	0.73112	0.760564	0.80674	0.730374	0.752083	0.631216	0.555811	0.249741																	19.7905	-0.0476731	0	0.795785					Yes
O60271	SPAG9	60	44	1	1.00161	0.991538	1.01148	0.999477	0.954549	0.871591	0.846243	0.76155	0.722057	0.711942	0.681474	0.677431	0.572726	0.522208	0.247894	1	0.983895	0.999751	0.980057	0.988397	0.944933	0.857914	0.79385	0.721296	0.634192	0.581582	0.53901	0.564849	0.523303	0.481376	0.184329	18.3877	-0.0516542	0	0.921936	15.9731	-0.0601161	0	0.947186	Yes	Yes	Yes	Yes
O60282	KIF5C	4		1	1.18767	1.13867	1.06405	0.980135	0.896885	0.779548	0.662592	0.465618	0.358461	0.412024	0.243271	0.169734	0.134848	0.115316	0.165454																	11.2496	-0.120026	0.0169343	0.96624					Yes		Yes
O60287	URB1	16	14	1	1.16309	0.998694	0.993987	0.883378	0.733962	0.527002	0.305254	0.210589	0.161419	0.132347	0.119247	0.127462	0.101411	0.104863	0.0855487	1	1.01642	0.988985	0.951261	0.871206	0.71969	0.523677	0.340551	0.238114	0.175329	0.138336	0.117624	0.132185	0.109087	0.0901186	0.0651885	8.71216	-0.195756	0.0695775	0.987932	8.76807	-0.170788	0.0367359	0.998272	Yes	Yes	Yes	Yes
O60291-2	MGRN1	7	5	1	0.963343	0.979611	1.01809	0.955093	0.872709	0.794813	0.69882	0.609542	0.5622	0.478432	0.431435	0.472627	0.413852	0.423958	0.404527	1	0.975368	0.982898	0.966465	0.92271	0.877563	0.774295	0.644255	0.501969	0.3685	0.344181	0.264011	0.249525	0.212463	0.26594	0.201168	13.762	-0.0842155	0.330006	0.993084	11.1649	-0.118391	0.129575	0.993704	Yes	Yes		Yes
O60292	SIPA1L3	1		1	1.21568	1.15739	1.19868	1.28122	0.966726	0.897095	0.820674	0.506334	0.40484	0.399011	0.299148	0.175171	0	0.202126	0.309017																	11.7213	-0.166215	0.164115	0.90441					Yes		Yes
O60293	ZFC3H1	9	8	1	1.05162	1.03969	0.978857	0.865616	0.751021	0.597311	0.44243	0.328117	0.316796	0.26693	0.254136	0.275271	0.258226	0.240359	0.290234	1	1.02024	1.01446	0.952056	0.916933	0.728026	0.552636	0.377928	0.258934	0.226626	0.155623	0.136375	0.115034	0.106507	0.101968	0.0927296	9.30419	-0.152499	0.221439	0.992453	9.00834	-0.164784	0.0454825	0.998679	Yes	Yes	Yes	Yes
O60294	LCMT2	1	3	1	1.00971	0.942095	0.960379	0.888811	0.67399	0.641195	0.41153	0.332639	0.218849	0.210421	0.157883	0.125686	0.0983282	0.169973	0	1	0.96362	0.979809	0.994097	0.820925	0.776246	0.584334	0.380874	0.28839	0.221111	0.177523	0.126275	0.0945021	0.0681689	0.0991011	0.0838138	9.27631	-0.139803	0	0.987547	9.15491	-0.1511	0	0.994171	Yes	Yes	Yes	Yes
O60296	TRAK2		1																	1	0.964889	0.896627	1.03099	0.855999	0.8231	0.636694	0.447949	0.321857	0.211419	0.258484	0.121007	0.0834677	0.0750613	0.0593707	0.104871					9.60457	-0.1489	0	0.985537		Yes		Yes
O60306	AQR	23	32	1	0.990215	0.983635	0.961495	0.896574	0.800548	0.603987	0.400601	0.264686	0.174138	0.129622	0.108686	0.0929522	0.0762023	0.0749946	0.0815019	1	1.00537	0.977161	1.0025	0.886232	0.788654	0.588653	0.414349	0.295712	0.194665	0.152898	0.11278	0.100561	0.0761545	0.096188	0.0965337	9.25576	-0.174972	0.0249769	0.997782	9.27763	-0.163341	0.0239646	0.997818	Yes	Yes	Yes	Yes
O60308	CEP104		1																	1	0.809243	0.906436	0.937505	0.738859	0.600162	0.617533	0.404085	0.339451	0.21833	0.189262	0.199501	0.0720646	0.0885719	0.105287	0.098521					8.70491	-0.135005	0	0.954756		Yes		Yes
O60313-2	OPA1	42	33	1	0.964899	0.933725	0.905875	0.883213	0.755955	0.575521	0.347222	0.215155	0.137389	0.0937703	0.0659858	0.0540571	0.04687	0.0524897	0.0436988	1	0.996056	0.949438	0.940353	0.886941	0.761898	0.567149	0.382523	0.261624	0.170986	0.129637	0.113785	0.0953769	0.0838607	0.105274	0.110567	8.93946	-0.185757	0	0.992392	9.03527	-0.17321	0.04059	0.995435	Yes	Yes	Yes	Yes
O60318	MCM3AP	12	6	1	1.00529	1.0157	0.973915	0.89187	0.784379	0.604368	0.4003	0.271363	0.183074	0.148464	0.120714	0.110418	0.0910817	0.0874582	0.09049	1	1.03541	1.03159	1.02986	0.916804	0.785631	0.622078	0.507187	0.333783	0.241691	0.209269	0.172518	0.15656	0.118109	0.173687	0.384467	9.23723	-0.169352	0.0346379	0.998127	9.50345	-0.16956	0.16639	0.96815	Yes	Yes	Yes	Yes
O60331-3	PIP5K1C		2																	1	1.33085	0.990698	1.05355	0.917584	0.850129	0.602577	0.492588	0.402205	0.234748	0.195316	0.202006	0.180222	0.110407	0.129563	0.105585					9.82527	-0.145061	0.0518002	0.952113		Yes		Yes
O60333-2	KIF1B	40	37	1	1.008	0.998724	0.989117	0.955603	0.939113	0.809163	0.733097	0.589354	0.468911	0.361054	0.24842	0.158356	0.131367	0.0913176	0.0697308	1	1.03105	1.02766	1.00682	0.979987	0.94658	0.821028	0.675059	0.582226	0.453056	0.347041	0.276622	0.179327	0.115766	0.0587788	0.0431054	11.8711	-0.127137	0	0.994621	11.7287	-0.127967	0	0.99284	Yes	Yes	Yes	Yes
O60333-3	KIF1B	2	2	1	0.944233	0.852745	0.874623	0.864705	0.675148	0.511134	0.324873	0.208716	0.12834	0.0863519	0.0713505	0.0451897	0.0355439	0.0345763	0	1	0.991302	1.02323	0.912474	1.09422	0.807822	0.540046	0.389027	0.297152	0.222545	0.145983	0.0968864	0.104554	0.0809174	0.0506027	0.0401513	8.54816	-0.18447	0	0.981559	9.29605	-0.183524	0.0357358	0.986722	Yes	Yes	Yes	Yes
O60336	MAPKBP1	1	5	1	0.955648	0.863674	0.892403	0.837957	0.606077	0.452922	0.251425	0.146302	0.0751191	0.0540611	0.0346353	0.0297392	0.0229816	0.0328994	0.0358861	1	1.04419	0.939184	0.952246	0.904821	0.775096	0.607371	0.42862	0.269492	0.188389	0.121836	0.100394	0.090351	0.0532437	0.06463	0.0651293	8.10238	-0.204316	0	0.985201	9.29664	-0.166227	0	0.995435	Yes	Yes	Yes	Yes
O60337	2021-03-06	2	4	1	1.05263	1.11504	1.09293	1.02543	1.01515	0.86405	0.682066	0.542194	0.426192	0.351307	0.283442	0.227726	0.215165	0.141598	0.0833266	1	1.06895	1.01259	1.03834	1.0379	0.960906	0.86853	0.713632	0.563243	0.431663	0.333488	0.284375	0.230437	0.203237	0.190946	0.155708	11.8096	-0.12428	0.0437556	0.984213	11.7863	-0.131361	0.112177	0.995661	Yes	Yes	Yes	Yes
O60341-2	KDM1A		25																	1	1.01654	1.00224	0.964649	0.981073	0.888685	0.762591	0.584655	0.403632	0.274872	0.194619	0.136021	0.0992035	0.0736347	0.0570028	0.047517					10.4734	-0.158341	0	0.998939		Yes		Yes
O60341	KDM1A	31		1	1.0004	0.968767	0.971344	1.00243	0.911744	0.747969	0.572317	0.41193	0.278646	0.193119	0.143805	0.115309	0.092922	0.0829606	0.0775247																	10.4554	-0.158361	0.0217431	0.998769					Yes		Yes
O60343	TBC1D4	32	36	1	1.00394	1.02534	1.01144	0.974065	0.91107	0.76601	0.558439	0.388664	0.272446	0.193032	0.149022	0.120402	0.0990541	0.0836139	0.0621256	1	1.02734	1.03294	1.02962	0.992327	0.951978	0.777455	0.571158	0.399245	0.258196	0.182738	0.137639	0.088863	0.0764156	0.0563909	0.0495844	10.4048	-0.161863	0.0276345	0.999589	10.4845	-0.171075	0.0137498	0.998649	Yes	Yes	Yes	Yes
O60344-4	ECE2	6	4	1	1.07137	1.0571	1.02475	1.01011	0.916326	0.797814	0.656772	0.492542	0.333565	0.19897	0.138425	0.0882204	0.0648261	0.0612503	0.0431373	1	0.961536	0.991009	0.936606	0.94325	0.942441	0.793968	0.599156	0.461802	0.343924	0.263755	0.15639	0.112113	0.0726047	0.0660492	0.07234	10.9574	-0.159466	0	0.994462	10.8617	-0.146676	0	0.994879	Yes	Yes	Yes	Yes
O60347	TBC1D12	2		1	1.09928	1.01554	1.05647	0.970098	0.822849	0.672761	0.494768	0.324027	0.231707	0.203182	0.163928	0.184163	0.14385	0.122936	0.130673																	9.77612	-0.166387	0.0965515	0.992578					Yes		Yes
O60353	FZD6	10	14	1	0.967118	0.992494	0.987817	0.967019	0.876398	0.714866	0.54718	0.413438	0.327254	0.257462	0.21269	0.175307	0.158232	0.152064	0.156728	1	1.01674	0.987503	0.973568	0.942015	0.867439	0.740434	0.559497	0.42093	0.321295	0.264256	0.228285	0.182648	0.159574	0.163446	0.195003	10.3911	-0.140934	0.0899417	0.998977	10.4478	-0.141079	0.11011	0.997347	Yes	Yes	Yes	Yes
O60361	NME2P1	1		1	1.01429	0.945857	0.976041	0.90715	0.954651	0.901126	1.02575	0.865811	0.831509	0.857851	0.94614	1.22819	1.04917	1.43736	1.80515																		0.402636	1.5	0.74901					Yes
O60427	FADS1	9	8	1	1.04666	1.03424	1.05594	0.965104	0.838257	0.674732	0.444894	0.300948	0.219507	0.171956	0.140812	0.125515	0.102191	0.110343	0.130051	1	0.982723	1.02543	1.15721	0.965383	0.794193	0.655944	0.482937	0.314801	0.226514	0.145089	0.122129	0.10385	0.0769939	0.0800474	0.0716873	9.63574	-0.182917	0.0829256	0.996335	9.69601	-0.162813	0.0145882	0.988085	Yes	Yes	Yes	Yes
O60437	PPL	24	31	1	0.976767	0.953534	0.975	0.950717	0.926877	0.804036	0.703934	0.59005	0.508378	0.430769	0.362808	0.319123	0.263835	0.226524	0.221911	1	0.990341	0.994189	0.993773	0.998368	0.913863	0.779294	0.688136	0.568461	0.473099	0.382044	0.313274	0.275797	0.234697	0.178551	0.156075	12.5165	-0.0898159	0.0100524	0.996469	12.0047	-0.10041	0	0.998592	Yes	Yes	Yes	Yes
O60443	DFNA5	7	6	1	1.03627	0.959127	1.01026	0.980006	0.884117	0.787359	0.644562	0.455042	0.310604	0.230252	0.151057	0.11733	0.125279	0.0946315	0.0694152	1	0.989495	0.913963	0.977853	0.913696	0.911432	0.763186	0.64268	0.535172	0.445769	0.330809	0.268813	0.240261	0.212776	0.142395	0.0454588	10.8318	-0.144942	0.000159873	0.996925	11.4601	-0.111438	0	0.988366	Yes	Yes	Yes	Yes
O60447	EVI5	3	3	1	1.08874	1.03156	1.01682	0.907145	0.81564	0.621052	0.472757	0.297093	0.2393	0.190113	0.138391	0.134336	0.0878223	0.104968	0.111887	1	1.01953	1.01696	0.943357	0.962329	0.846447	0.706125	0.485911	0.347364	0.246048	0.172407	0.124715	0.106708	0.107547	0.118855	0.116806	9.57429	-0.157101	0.0418012	0.994204	9.90127	-0.167738	0.0580051	0.9968	Yes	Yes	Yes	Yes
O60476	MAN1A2	6	7	1	1.00477	1.04263	0.963161	0.929226	0.810837	0.632441	0.381653	0.260269	0.148352	0.0974487	0.0792612	0.0647344	0.056027	0.0560502	0.0284157	1	1.02957	0.998654	1.00139	0.928338	0.819005	0.619042	0.400174	0.283373	0.197517	0.138215	0.105572	0.0853643	0.0738105	0.0626599	0.057553	9.31601	-0.187142	0.000980066	0.997736	9.39549	-0.174181	0.016116	0.99923	Yes	Yes	Yes	Yes
O60487	MPZL2	4	3	1	1.03146	1.04962	1.08157	1.09049	1.02004	0.946792	0.842918	0.72547	0.665527	0.654727	0.565012	0.580975	0.480024	0.656509	0.81463	1	0.957934	1.03909	1.00384	1.03204	1.02563	0.839369	0.683452	0.647909	0.624567	0.547232	0.528008	0.492534	0.487253	0.582498	0.618885		-0.120882	0.623238	0.870641		-0.133418	0.54695	0.963552	Yes	Yes
O60488	ACSL4	39	28	1	0.96689	0.968183	0.959476	0.897782	0.791418	0.646054	0.443794	0.308435	0.219651	0.168138	0.133256	0.109198	0.0909341	0.101475	0.0953647	1	1.01601	0.969043	0.94963	0.910184	0.790626	0.661601	0.451226	0.329496	0.229836	0.160263	0.121281	0.0742573	0.0556398	0.0547368	0.0527655	9.51949	-0.154538	0.0186033	0.996594	9.613	-0.158533	0	0.996514	Yes	Yes	Yes	Yes
O60493	SNX3	11	9	1	0.995791	0.972535	0.968446	0.954364	0.929235	0.855933	0.769135	0.633223	0.480805	0.386568	0.312491	0.241745	0.193529	0.201139	0.180456	1	1.01215	0.938751	0.942516	0.970388	0.956795	0.865939	0.760385	0.644379	0.51038	0.388725	0.309799	0.224874	0.19751	0.196005	0.15912	12.3506	-0.112071	0.0530528	0.995883	12.4541	-0.112401	0.0328097	0.993939	Yes	Yes	Yes	Yes
O60499	STX10	11	5	1	0.973819	0.983179	1.00871	0.983242	0.920977	0.851102	0.73445	0.651729	0.547326	0.487687	0.537774	0.463905	0.448977	0.405191	0.34301	1	1.06408	1.04722	1.00024	1.01423	0.959653	0.911658	0.765226	0.666611	0.583476	0.516011	0.446602	0.461405	0.392686	0.374501	0.25844	14.3698	-0.078448	0.288083	0.990192	14.1181	-0.0810447	0.175796	0.987512	Yes	Yes	Yes	Yes
O60502	MGEA5	47	41	1	0.968536	0.965445	0.947787	0.92904	0.813118	0.656786	0.44419	0.29227	0.18675	0.120225	0.0837641	0.058295	0.0509539	0.0451695	0.045043	1	0.990529	0.962229	0.959158	0.9199	0.789541	0.627425	0.453144	0.310775	0.196986	0.136483	0.0972983	0.0615792	0.0436553	0.035708	0.0281454	9.54252	-0.176071	0	0.996778	9.48194	-0.168941	0	0.996847	Yes	Yes	Yes	Yes
O60503	ADCY9	1	1	1	0.964649	1.02299	0.91436	0.81264	0.879854	0.683525	0.553718	0.406252	0.342492	0.250804	0.235173	0.191634	0.157097	0.161341	0.163948	1	0.882682	0.942587	1.14095	1.05983	0.695388	0.625177	0.361586	0.308698	0.200255	0.20836	0.145749	0.082013	0.149787	0	0.1288	10.3548	-0.11505	0	0.984206	9.24906	-0.176186	0.0618751	0.965587	Yes	Yes	Yes	Yes
O60504	SORBS3	16	15	1	0.961476	0.982117	0.968452	0.954438	0.888786	0.833117	0.811193	0.724462	0.663074	0.669259	0.687381	0.745991	0.637111	0.806345	1.03526	1	0.983987	0.940934	0.990456	0.957786	0.962604	0.821865	0.749186	0.612523	0.547285	0.504966	0.457006	0.50972	0.467285	0.558342	0.635044		-0.0831858	0.749738	0.557861		-0.126301	0.514259	0.951499	Yes	Yes
O60506-3	SYNCRIP	2	1	1	1.06384	1.02117	1.04479	1.065	0.927834	0.856095	0.68097	0.605179	0.431772	0.371633	0.208353	0.16102	0.12657	0.125543	0.0752628	1	0.977921	1.0009	1.07378	0.981125	0.779156	0.827832	0.661059	0.49958	0.360195	0.429147	0.319815	0.202681	0.176265	0.12258	0.14166	11.7978	-0.128952	0	0.9906	11.4336	-0.108042	0	0.97834	Yes	Yes	Yes	Yes
O60506	SYNCRIP	57	69	1	1.0043	0.991839	1.00657	1.00502	0.928685	0.827205	0.717891	0.617811	0.500919	0.405465	0.246693	0.129885	0.103065	0.084641	0.0726428	1	1.00168	1.00091	0.985142	0.994456	0.91034	0.823573	0.69192	0.573373	0.458705	0.377482	0.261208	0.157928	0.0981099	0.0841189	0.0756759	12.0225	-0.129214	0	0.989477	11.751	-0.126261	0	0.993107	Yes	Yes	Yes	Yes
O60508	CDC40	8	10	1	1.01398	0.990674	0.998522	0.941438	0.825846	0.70485	0.466611	0.298234	0.229169	0.166858	0.12593	0.112905	0.095732	0.0989889	0.0931084	1	1.02471	1.00007	1.01171	0.9155	0.787053	0.626559	0.453908	0.295853	0.179833	0.123899	0.0865583	0.0910901	0.0579241	0.0698772	0.0833075	9.75162	-0.171206	0.0477263	0.997987	9.44681	-0.166277	0.000392104	0.997023	Yes	Yes	Yes	Yes
O60512	B4GALT3	1	1	1	0.898304	0.95253	0.865685	0.906912	0.832341	0.780648	0.592188	0.48816	0.436786	0.378535	0.339927	0.269491	0.211846	0.171828	0.261672	1	1.46684	1.66004	1.68818	1.37756	1.6218	1.20012	1.04037	0.865689	0.443965	0.37176	0.687705	0.476661	0.181372	0.23814	0	11.3733	-0.0939064	0	0.969153	14.2558	-0.115065	0	0.601841	Yes	Yes	Yes
O60513	B4GALT4	3		1	1.08359	1.00348	1.07802	1.01621	0.921415	0.815246	0.677625	0.497051	0.415955	0.314845	0.252323	0.16417	0.167677	0.183593	0.21777																	11.2968	-0.137524	0.120774	0.988812					Yes		Yes
O60518	RANBP6	6	6	1	0.991804	0.97022	1.00563	0.893987	0.884544	0.729643	0.544678	0.386983	0.278838	0.193556	0.127742	0.122432	0.0808939	0.0473691	0.0590964	1	0.967641	0.994921	0.988697	0.961307	0.905911	0.740827	0.50648	0.359199	0.253922	0.147351	0.116493	0.0781274	0.053827	0.0549292	0.0718019	10.2635	-0.152464	0	0.996236	10.1388	-0.172289	0.00994718	0.998424	Yes	Yes	Yes	Yes
O60524	NEMF	33	30	1	0.973898	0.987532	0.970731	0.944759	0.843633	0.672532	0.466154	0.352621	0.274114	0.2229	0.180937	0.142299	0.114954	0.073037	0.0591008	1	1.01813	1.01582	1.01247	0.947432	0.857258	0.674341	0.490129	0.367763	0.282943	0.224008	0.186341	0.148876	0.111751	0.075483	0.0528033	9.94784	-0.14163	0	0.998295	10.0658	-0.140702	0	0.998689	Yes	Yes	Yes	Yes
O60547	GMDS	1	4	1	1.01153	1.14007	1.00866	0.937948	0.811804	0.713943	0.455335	0.358643	0.198225	0.18963	0.138901	0.105646	0.070798	0.154953	0.150835	1	0.959132	0.969553	0.987589	0.917154	0.826038	0.678701	0.524032	0.417089	0.288128	0.214764	0.18352	0.129136	0.101384	0.110009	0.135428	9.7667	-0.170253	0.0725559	0.984884	10.1352	-0.133225	0.00244796	0.995826	Yes	Yes	Yes	Yes
O60551	NMT2		9																	1	1.06045	1.04589	1.19077	1.05223	0.993788	0.846555	0.609427	0.385838	0.284491	0.180834	0.139893	0.101053	0.0728799	0.0770077	0.0870382					10.6405	-0.195891	0.060682	0.98357		Yes		Yes
O60563	CCNT1	13	9	1	0.981396	0.961397	0.968527	0.900279	0.798067	0.597559	0.388703	0.242956	0.154148	0.0984993	0.0705708	0.0482921	0.042616	0.0379198	0.0357029	1	0.974163	0.973427	0.973914	0.925087	0.797461	0.597137	0.42553	0.284813	0.188933	0.129411	0.0892672	0.0652148	0.0570893	0.0491732	0.045475	9.19426	-0.186622	0	0.997563	9.34891	-0.171398	0	0.998683	Yes	Yes	Yes	Yes
O60566-3	BUB1B	38	40	1	0.973293	0.985836	0.941979	0.918772	0.807586	0.653213	0.46406	0.32626	0.226878	0.177799	0.143432	0.12594	0.102825	0.0929495	0.0566036	1	1.00864	0.989088	0.974087	0.921715	0.820442	0.641724	0.446024	0.318759	0.214423	0.158198	0.125174	0.112498	0.0966022	0.0904315	0.0635857	9.68067	-0.1486	0	0.997737	9.59429	-0.160025	0.017711	0.999112	Yes	Yes	Yes	Yes
O60568	PLOD3	29	21	1	0.991464	1.00934	0.992377	0.948851	0.906213	0.81225	0.685901	0.558621	0.444935	0.353743	0.246432	0.148963	0.116485	0.0803418	0.0657312	1	1.01807	1.00381	1.03682	0.957096	0.951148	0.841457	0.721358	0.6117	0.491993	0.409949	0.303113	0.200273	0.13451	0.0882582	0.0740347	11.602	-0.1272	0	0.993946	12.1548	-0.120614	0	0.992574	Yes	Yes	Yes	Yes
O60573	EIF4E2	8	16	1	0.931824	0.920643	0.975323	0.892889	0.811691	0.702563	0.505088	0.36292	0.23654	0.181635	0.13889	0.0999114	0.0739291	0.0495113	0.028134	1	0.996864	0.992772	0.976968	0.926148	0.83719	0.760065	0.568841	0.41621	0.299519	0.208823	0.16801	0.128113	0.0969216	0.0703428	0.0501907	9.91556	-0.153619	0	0.990849	10.4318	-0.143508	0	0.997033	Yes	Yes	Yes	Yes
O60583	CCNT2		2																	1	0.986341	0.995885	1.02243	0.837804	0.748281	0.596762	0.370339	0.297251	0.237931	0.146583	0.131866	0.0920894	0.100468	0.125859	0.0911316					9.13221	-0.152796	0.0176147	0.994434		Yes		Yes
O60610	DIAPH1	78	64	1	1.00875	0.97933	0.994368	0.976526	0.885905	0.70061	0.493934	0.328457	0.203908	0.129605	0.0876247	0.0574633	0.0495088	0.0455063	0.0397831	1	0.625588	0.883848	0.620497	0.876341	0.909076	0.648504	0.505425	0.333838	0.221418	0.134822	0.0909485	0.0593971	0.0428327	0.0424895	0.0414525	9.92043	-0.180894	0	0.999484	9.82213	-0.170315	0	0.839312	Yes	Yes	Yes	Yes
O60613	2021-09-15	6	6	1	1.01247	1.01729	0.997003	0.986737	0.959063	0.87513	0.742059	0.605735	0.436247	0.313152	0.23504	0.184307	0.17033	0.136882	0.0561387	1	1.01626	1.02814	1.04101	1.04647	1.03422	0.84888	0.76439	0.642284	0.474935	0.32832	0.219215	0.188401	0.150584	0.148244	0.0705438	11.9477	-0.130106	0	0.998676	12.145	-0.132925	0.00604111	0.993174	Yes	Yes	Yes	Yes
O60635	TSPAN1		1																	1	0.849463	1.01621	0.884003	0.855432	0.618148	0.855798	0.558309	0.497319	0.336119	0.309325	0.325074	0.168483	0.237385	0.222419	0.224341					10.5903	-0.097529	0	0.920776		Yes		Yes
O60637	TSPAN3	4	2	1	1.01115	0.976209	0.978001	0.988946	0.983515	0.888249	0.875949	0.798384	0.762531	0.809187	0.826332	0.862819	0.816776	0.994944	1.30902	1	1.06477	1.0357	0.97542	0.979237	0.995374	0.91791	0.836607	0.800413	0.731747	0.693144	0.720632	0.744448	0.736273	0.973221	1.119		-0.452947	0.894419	0.127935		-0.120668	0.815668	0.442466	Yes	Yes
O60645	EXOC3	17	11	1	0.942136	0.92595	0.928331	0.83748	0.704758	0.491172	0.297642	0.193003	0.122191	0.087247	0.0696078	0.0618125	0.0557457	0.051689	0.0500476	1	0.999642	0.962605	0.908582	0.843405	0.665032	0.488838	0.274025	0.17905	0.107518	0.0666819	0.0566093	0.03793	0.0364805	0.0368699	0.0412313	8.50795	-0.184847	0	0.992865	8.37234	-0.194109	0	0.995	Yes	Yes	Yes	Yes
O60658	PDE8A	2	2	1	1.07105	1.08986	1.02549	0.971664	0.822567	0.66015	0.587896	0.46986	0.466467	0.260668	0.333382	0.265289	0.285815	0.268772	0.214688	1	0.95456	1.02259	1.13854	1.00737	0.859776	0.727427	0.618422	0.45575	0.331391	0.296248	0.232972	0.185637	0.166731	0.206154	0.115364	10.8119	-0.112611	0.160201	0.981286	10.7726	-0.129808	0.072343	0.985532	Yes	Yes	Yes	Yes
O60664-2	PLIN3		1																	1	1.03811	0.964894	1.01823	0.957933	0.705345	0.65862	0.919512	0.585839	0.634978	0.769263	0.519904	0.360803	0.202783	0.170893	0.119823					13.6661	-0.0805661	0	0.827356		Yes		Yes
O60664	PLIN3	54	41	1	1.00823	1.00719	1.00973	1.00707	0.977101	0.915535	0.887114	0.787134	0.74489	0.700759	0.612398	0.487064	0.387955	0.207617	0.111327	1	1.08188	1.0426	1.36964	1.07546	1.10161	1.08677	1.06201	0.955497	0.953437	0.830534	0.800237	0.734514	0.621709	0.312865	0.12188	15.4522	-0.0946664	0	0.969592	17.6783	-0.137073	0	0.862612	Yes	Yes	Yes	Yes
O60671	RAD1	8	4	1	1.02293	0.971401	0.963735	0.97623	0.922412	0.80895	0.685706	0.530113	0.442721	0.357396	0.309862	0.286536	0.242549	0.242738	0.210963	1	1.02162	0.958249	0.967473	0.925272	0.866457	0.754799	0.593814	0.439166	0.364325	0.277206	0.240763	0.21683	0.181026	0.171831	0.129817	11.6893	-0.115421	0.145742	0.997954	10.7916	-0.121106	0.044385	0.996971	Yes	Yes	Yes	Yes
O60674	JAK2	2	2	1	1.13949	1.11351	1.15061	1.10485	0.938523	0.783805	0.631297	0.396289	0.347385	0.314209	0.251877	0.235325	0.203146	0.20192	0.16564	1	0.897127	1.05662	0.853165	0.781512	0.686217	0.572636	0.330816	0.190104	0.167147	0.0722829	0.103753	0.0552077	0.035022	0.0402083	0.0735985	10.7479	-0.160856	0.175709	0.968886	8.55171	-0.17018	0	0.976277	Yes	Yes	Yes	Yes
O60678	PRMT3	16	15	1	0.99078	1.00011	0.967722	0.924489	0.809012	0.58065	0.348814	0.225681	0.141556	0.0890988	0.0642126	0.0485694	0.0412	0.0337692	0.0239494	1	1.00963	1.04764	1.00106	0.985313	0.844516	0.614041	0.415241	0.287785	0.214623	0.154606	0.124214	0.108479	0.0988763	0.0837054	0.0722719	9.11046	-0.197621	0	0.99921	9.46738	-0.18339	0.056113	0.998703	Yes	Yes	Yes	Yes
O60684	KPNA6	15	9	1	0.984784	0.952905	0.940957	0.876512	0.748131	0.596831	0.3892	0.257192	0.163709	0.11442	0.0826441	0.0588003	0.052167	0.0489876	0.0356057	1	1.03919	0.967055	0.968733	0.960333	0.76287	0.599561	0.41906	0.301025	0.195274	0.142389	0.111751	0.0782233	0.0625319	0.0456234	0.0401571	9.0886	-0.173441	0	0.995397	9.34269	-0.165814	0	0.997773	Yes	Yes	Yes	Yes
O60701	UGDH	44	47	1	0.965517	0.95194	0.953798	0.919036	0.821309	0.679573	0.479057	0.356868	0.258791	0.188559	0.147802	0.101627	0.0858188	0.0735981	0.0790722	1	0.983649	0.967211	0.950925	0.897466	0.806491	0.658042	0.477099	0.365242	0.2766	0.213671	0.163027	0.1114	0.0798452	0.0572857	0.044776	9.86471	-0.147718	0	0.99652	9.81464	-0.143691	0	0.996132	Yes	Yes	Yes	Yes
O60704	TPST2		1																	1	1.02482	0.988846	0.933942	0.84277	0.872502	0.704595	0.553151	0.441069	0.284756	0.236414	0.194925	0.100809	0.0704536	0.0856254	0.0597025					10.3151	-0.138551	0	0.988347		Yes		Yes
O60716	CTNND1	44	37	1	0.960938	0.954759	0.936925	0.883412	0.751281	0.584074	0.354015	0.23049	0.151756	0.110662	0.0880227	0.0798501	0.0692485	0.0732607	0.0653602	1	0.963494	0.917855	0.936583	0.857998	0.718667	0.528659	0.332001	0.212957	0.131595	0.0927446	0.0668925	0.0576356	0.0473414	0.0557641	0.0639769	8.98077	-0.177302	0.0099008	0.994884	8.7075	-0.181452	0	0.99316	Yes	Yes	Yes	Yes
O60725	ICMT	3	1	1	0.977896	0.986668	0.952476	0.920596	0.753612	0.5843	0.379392	0.268037	0.179755	0.14661	0.126459	0.111244	0.100017	0.111589	0.134508	1	2.82993	1.16472	1.05363	1.15204	1.01263	0.719942	0.541242	0.385766	0.192075	0.188161	0.228768	0.0917339	0.0762166	0.0692901	0.113904	9.07823	-0.178564	0.0680424	0.997022	10.2295	-0.196051	0.0823943	0.550646	Yes	Yes	Yes
O60733	PLA2G6		1																	1	1.24061	1.21833	1.26755	1.099	1.21148	0.737075	0.722429	0.481642	0.347581	0.400882	0.29541	0.326653	0.187096	0.316904	0.220389					11.1932	-0.16752	0.253504	0.890485		Yes		Yes
O60749	SNX2	29	27	1	0.9756	0.977875	0.967785	0.976355	0.928819	0.807986	0.624097	0.460444	0.284247	0.187871	0.121253	0.0901088	0.0692532	0.0578727	0.0401203	1	0.97447	0.93486	0.972772	0.967362	0.902541	0.820521	0.653677	0.491814	0.32321	0.214399	0.138914	0.0932851	0.0736166	0.0667309	0.0598666	10.7714	-0.165873	0	0.998379	10.9716	-0.156832	0	0.99547	Yes	Yes	Yes	Yes
O60762	DPM1	13	15	1	0.952582	0.960846	0.936608	0.881366	0.74525	0.535705	0.316362	0.202825	0.116237	0.0803968	0.0524204	0.0438881	0.0343355	0.0394461	0.0311192	1	0.957113	0.925625	0.902319	0.847234	0.703421	0.484171	0.295857	0.184873	0.107716	0.0753114	0.0570782	0.0366766	0.0294302	0.0347712	0.0334295	8.7761	-0.196425	0	0.995699	8.48705	-0.194772	0	0.992101	Yes	Yes	Yes	Yes
O60763-2	USO1	58	58	1	0.958105	0.941011	0.928809	0.877289	0.754711	0.582533	0.359239	0.227618	0.135225	0.0865949	0.0591531	0.0418837	0.0381448	0.0346966	0.0283379	1	1.01003	0.930282	0.924627	0.900399	0.774818	0.586579	0.395921	0.262467	0.160208	0.108079	0.0854109	0.0545055	0.0439648	0.0447755	0.0474655	8.97765	-0.188398	0	0.993338	9.1549	-0.17702	0	0.994645	Yes	Yes	Yes	Yes
O60765	ZNF354A	2	1	1	1.15034	1.28089	1.18897	1.09719	0.922401	0.916362	0.568493	0.510223	0.495891	0.340319	0.287222	0	0.106103	0.406323	0.268819	1	0.842843	1.10939	1.06916	0.780927	0.910389	0.668809	0.460001	0.423212	0.335297	0.141024	0.16127	0.149097	0.149933	0.147867	0.144248	11.2382	-0.151869	0.188231	0.887815	9.99291	-0.141331	0.0526873	0.955401	Yes	Yes	Yes	Yes
O60779	SLC19A2	1		1	1.14285	1.04757	1.12561	0.882353	0.980355	0.818629	0.606031	0.470111	0.382993	0.400492	0.322476	0.289104	0.238477	0.177376	0.28688																	11.1317	-0.13955	0.220374	0.964276					Yes		Yes
O60783	MRPS14	3	2	1	1.0298	0.970645	1.02728	0.922011	0.861675	0.662063	0.42065	0.273983	0.169307	0.126777	0.0922141	0.0717305	0.0482501	0.0461077	0.032175	1	1.01227	1.01552	1.01096	0.844485	0.906394	0.758899	0.430275	0.303792	0.230533	0.187185	0.163658	0.121682	0.0840856	0.0866987	0.0730687	9.56019	-0.186065	0.00489288	0.997958	9.87855	-0.183007	0.0629161	0.988545	Yes	Yes	Yes	Yes
O60784	TOM1	12	8	1	1.02595	1.05204	1.0424	1.01112	0.955902	0.90344	0.850945	0.7828	0.727294	0.738477	0.710803	0.661592	0.574835	0.528517	0.18793	1	1.00487	1.01842	1.01975	0.996901	0.958647	0.876272	0.785604	0.709035	0.615327	0.597102	0.570009	0.562466	0.490552	0.481429	0.174199	17.9935	-0.0568115	0	0.903611	15.8724	-0.061319	0	0.948321	Yes	Yes	Yes	Yes
O60825	PFKFB2	20	13	1	0.979034	0.981988	0.992477	0.971896	0.925377	0.804803	0.700718	0.581976	0.481065	0.428971	0.368793	0.329094	0.285239	0.280235	0.253614	1	0.993377	1.02723	1.00807	1.01012	0.921303	0.848353	0.734183	0.592674	0.47435	0.427908	0.387598	0.322779	0.293428	0.280822	0.223134	12.3315	-0.0980109	0.149019	0.998938	12.4866	-0.101284	0.150709	0.99757	Yes	Yes	Yes	Yes
O60826	CCDC22	14	13	1	0.988926	0.994373	0.990395	0.972018	0.885786	0.775679	0.622927	0.438857	0.287894	0.194774	0.143412	0.111257	0.106971	0.0972753	0.0745913	1	1.03648	0.975836	1.01695	0.976496	0.920152	0.82325	0.640514	0.446436	0.301383	0.196704	0.127411	0.0885875	0.083121	0.083061	0.0561409	10.6538	-0.152874	0.0118698	0.99818	10.8271	-0.163872	0.00710281	0.998234	Yes	Yes	Yes	Yes
O60828	PQBP1	8	7	1	0.998541	1.04281	0.979528	0.973156	0.958241	0.887632	0.783262	0.704436	0.686188	0.702593	0.69659	0.739676	0.650594	0.835913	0.992536	1	0.976293	0.895586	0.98169	0.893458	0.873204	0.742818	0.723951	0.570174	0.45257	0.480404	0.423409	0.475912	0.45865	0.590984	0.59451		-0.13367	0.751705	0.689773	16.5112	-0.110974	0.480621	0.906629	Yes	Yes
O60830-2	TIMM17B	1		1	1.13763	1.14839	0.932181	1.00183	0.904811	0.814034	0.520869	0.302885	0.187001	0.118024	0	0	0.000231056	0.000163792	0																	10.1365	-0.227022	0	0.9833					Yes		Yes
O60831	PRAF2	4	4	1	1.02038	1.01626	0.99677	0.919848	0.904813	0.759464	0.606461	0.494495	0.40168	0.374687	0.296562	0.269669	0.217586	0.199053	0.174057	1	1.04747	1.00543	0.984124	1.00174	0.900199	0.818994	0.688602	0.528038	0.45163	0.378709	0.339891	0.289606	0.242223	0.224038	0.15534	11.3144	-0.106827	0.0585497	0.997189	11.9361	-0.103117	0.0549413	0.996557	Yes	Yes	Yes	Yes
O60832	DKC1	25	21	1	0.996876	0.980833	0.974831	0.94719	0.871675	0.73453	0.619271	0.53647	0.482903	0.460088	0.44104	0.427422	0.373093	0.434027	0.463459	1	0.975974	0.962112	0.960019	0.956967	0.826712	0.659829	0.576664	0.451406	0.396251	0.343486	0.319352	0.329736	0.307456	0.349159	0.314012	12.1317	-0.11452	0.398766	0.99272	10.5152	-0.129163	0.279486	0.994155	Yes	Yes		Yes
O60841	EIF5B	65	61	1	0.96615	0.935912	0.927357	0.892882	0.799114	0.590404	0.351463	0.230444	0.14622	0.0999613	0.0780824	0.0646454	0.0580636	0.0546163	0.0527	1	0.977976	0.971227	0.938961	0.906682	0.796346	0.588052	0.366387	0.251275	0.166238	0.111571	0.087779	0.0657716	0.0540533	0.0598031	0.051134	9.09151	-0.188784	0.00893977	0.994038	9.15394	-0.179909	0.00349952	0.997302	Yes	Yes	Yes	Yes
O60858-3	TRIM13	3	1	1	1.03028	1.01734	0.955931	0.869577	0.790323	0.642686	0.452614	0.342423	0.253268	0.172808	0.114298	0.101016	0.0853809	0.0735266	0.0930955	1	0.977554	1.04577	1.03335	0.854085	0.807415	0.664477	0.523964	0.342424	0.245316	0.202919	0.164087	0.168084	0.10458	0.116508	0.111335	9.5784	-0.147462	0	0.995616	9.84528	-0.137556	0.0108344	0.992286	Yes	Yes	Yes	Yes
O60869	EDF1	14	9	1	0.920035	0.91287	0.887564	0.844502	0.815163	0.651796	0.566261	0.487387	0.443973	0.4305	0.435309	0.432111	0.345953	0.368356	0.527535	1	0.945473	0.88369	0.885015	0.872573	0.767702	0.678112	0.564159	0.46495	0.420775	0.352285	0.33552	0.352002	0.332703	0.344096	0.436173	11.6187	-0.0993966	0.346917	0.936346	10.7765	-0.104645	0.270418	0.955854	Yes	Yes		Yes
O60870	KIN	7	12	1	0.959654	0.92689	0.932355	0.83091	0.712575	0.506376	0.298024	0.192516	0.125002	0.0813459	0.0587577	0.0506329	0.0350739	0.0433081	0.0472864	1	0.969877	0.952867	0.937039	0.858938	0.734698	0.515561	0.317334	0.203519	0.123387	0.0801293	0.0525276	0.0508354	0.0325535	0.0320766	0.0309272	8.54967	-0.188495	0	0.992844	8.69076	-0.19254	0	0.995657	Yes	Yes	Yes	Yes
O60879	DIAPH2	13	12	1	1.00465	0.959887	0.928835	0.853369	0.761275	0.563119	0.357709	0.24083	0.162543	0.123388	0.0957474	0.0849541	0.0732263	0.0814719	0.0863189	1	0.980646	0.982964	0.970853	0.855888	0.712106	0.566123	0.370731	0.231689	0.147194	0.105468	0.0760132	0.0554487	0.0493333	0.0575657	0.0577938	8.94029	-0.170603	0.0128693	0.994618	8.85987	-0.174527	0	0.99627	Yes	Yes	Yes	Yes
O60884	DNAJA2	26	22	1	0.988626	0.988415	0.977019	0.940277	0.878623	0.713267	0.52501	0.388066	0.264473	0.191286	0.145724	0.119851	0.103516	0.0822093	0.06842	1	1.00777	0.950348	0.972301	0.914058	0.846201	0.665519	0.520767	0.37526	0.258496	0.187703	0.140384	0.0988637	0.0866994	0.0719578	0.0464	10.1933	-0.149945	0.00550673	0.999191	9.98075	-0.14949	0	0.997077	Yes	Yes	Yes	Yes
O60885	BRD4	17	17	1	0.979073	1.02168	1.01294	0.990486	0.947226	0.825931	0.726179	0.622743	0.525045	0.487982	0.421827	0.392756	0.303402	0.255053	0.210851	1	0.993772	1.00043	1.01707	0.981231	0.937113	0.82847	0.760281	0.608539	0.505326	0.417949	0.356006	0.338587	0.294551	0.234811	0.205836	13.1983	-0.0826241	0	0.995425	12.6582	-0.0962825	0.0770542	0.998099	Yes	Yes	Yes	Yes
O60888-2	CUTA	6	7	1	1.29256	1.22169	1.23732	1.21353	1.10169	1.01222	0.917463	0.663571	0.642337	0.612249	0.578541	0.555039	0.510724	0.595076	0.851635	1	1.16254	1.23136	1.3002	1.33292	1.09626	0.952898	0.825025	0.642654	0.609291	0.471377	0.483141	0.463331	0.409352	0.487759	0.538202		-0.258077	0.619953	0.733039	14.0713	-0.148407	0.469915	0.820682	Yes	Yes
O60890	OPHN1	2	1	1	1.10876	1.02193	1.18674	0.952005	0.888024	0.922868	0.866755	0.723778	0.730133	0.873166	0.841496	0.915833	0.729245	0.734675	1.16832	1	1.13608	1.23803	0.897129	1.01552	1.04443	0.783093	0.542471	0.578041	0.248079	0.127126	0.125284	0	0	0.000231598	9.73689e-05		-0.0661795	0.84722	0.368869	10.7336	-0.188245	0	0.956702	Yes	Yes		Yes
O60906	SMPD2	4	4	1	1.01792	1.06883	1.06327	0.9393	0.887102	0.806254	0.588935	0.401939	0.322411	0.305295	0.278063	0.22082	0.2088	0.193278	0.197373	1	0.953318	0.959217	1.04198	0.942771	0.879609	0.751023	0.494828	0.412155	0.291766	0.256128	0.206	0.161739	0.14571	0.142493	0.138612	10.6328	-0.152618	0.17173	0.991361	10.2779	-0.150421	0.0921093	0.994718	Yes	Yes	Yes	Yes
O60907	TBL1X	14	15	1	0.970598	1.00555	0.988387	0.99143	0.95734	0.861137	0.796989	0.670609	0.572817	0.484365	0.36832	0.28428	0.209241	0.0903067	0.049063	1	1.00524	0.948244	0.975534	1.0244	0.967082	0.870702	0.777271	0.670955	0.554281	0.462957	0.405067	0.306878	0.228358	0.0832311	0.0519743	12.9808	-0.113057	0	0.98766	12.9708	-0.10976	0	0.983916	Yes	Yes	Yes	Yes
O60911	CTSV	4	3	1	1.04124	1.09151	1.03956	1.00965	1.08496	0.997585	0.880972	0.814748	0.732061	0.748061	0.783249	0.72394	0.737425	0.897888	1.27459	1	0.931087	1.07784	1.15666	1.18645	1.05275	0.900991	0.819332	0.729953	0.626826	0.639399	0.573212	0.586329	0.537141	0.76587	1.00005		-0.752951	0.838995	0.350699		-0.127599	0.677735	0.674666	Yes	Yes
O60921	HUS1	6	8	1	1.03389	0.990335	0.983184	0.949025	0.882516	0.741287	0.614383	0.461209	0.364008	0.330337	0.305166	0.300576	0.256704	0.263027	0.237398	1	0.993115	1.07673	1.07732	1.01738	0.935041	0.818371	0.633261	0.517371	0.386917	0.308241	0.280906	0.291319	0.282591	0.288132	0.202481	10.8763	-0.128148	0.203232	0.997467	11.1704	-0.143687	0.221813	0.989948	Yes	Yes	Yes	Yes
O60925	PFDN1	14	8	1	1.0026	0.982151	0.994395	1.03297	0.992893	0.922822	0.848476	0.745897	0.724816	0.758415	0.751496	0.799676	0.673068	0.903441	1.20279	1	1.02385	0.974355	0.978157	0.95947	0.960878	0.873796	0.792386	0.732035	0.698666	0.607217	0.605187	0.696291	0.696216	0.897556	0.962647		-0.124043	0.821735	0.363986		-0.114175	0.737543	0.633805	Yes	Yes
O60927	PPP1R11	3	3	1	1.1151	1.07375	1.0441	0.987829	0.900558	0.778297	0.85776	0.769796	0.744704	0.784633	0.761865	0.845	0.79672	0.874742	1.22209	1	1.09987	1.20459	1.13804	1.06804	1.01509	0.977153	0.832706	0.711612	0.680875	0.622998	0.601677	0.716683	0.647859	0.849417	0.929181		-0.922843	0.84356	0.387132		-0.224444	0.719483	0.719575	Yes	Yes
O60930	RNASEH1		2																	1	1.0912	1.10092	0.915531	0.869293	0.920406	0.713118	0.580715	0.475002	0.313533	0.238615	0.16347	0.166087	0.121061	0.119392	0.138249					10.5941	-0.131562	0.0129961	0.980529		Yes		Yes
O60931-2	CTNS	1		1	1.04166	0.892166	0.876188	0.893883	0.845532	0.708211	0.582031	0.413523	0.341858	0.286236	0.266103	0.282213	0.241167	0.125442	0.172045																	10.6226	-0.108232	0.0168791	0.976114					Yes		Yes
O60934	NBN	19	13	1	0.992891	0.973988	0.988789	0.942327	0.860006	0.716337	0.523312	0.375223	0.28291	0.222927	0.178616	0.151595	0.14313	0.139925	0.170142	1	0.976122	0.961416	0.950199	0.952902	0.875156	0.686033	0.520848	0.372482	0.266592	0.193733	0.147315	0.140841	0.10733	0.122019	0.132313	10.1129	-0.156153	0.0972178	0.997754	10.0447	-0.158266	0.0637681	0.996631	Yes	Yes	Yes	Yes
O60936-2	NOL3	11	6	1	1.21108	1.0841	1.01252	1.08537	0.981542	0.927287	0.906295	0.817728	0.750861	0.734757	0.804884	0.895663	0.731427	0.927236	1.14918	1	0.958805	0.943243	0.996853	0.971745	0.93359	0.880648	0.805168	0.698153	0.662821	0.611834	0.551013	0.674786	0.657516	0.791088	0.913554		-0.0719052	0.854585	0.393178		-0.108369	0.693956	0.716917	Yes	Yes
O60941	DTNB	4	3	1	1.03336	0.956631	0.965425	0.959054	0.843572	0.699466	0.474525	0.353047	0.235901	0.180777	0.141845	0.122643	0.113654	0.104956	0.105564	1	0.97464	1.14224	1.05837	0.973515	0.899322	0.815889	0.643039	0.466037	0.379613	0.319834	0.246452	0.258457	0.214872	0.216271	0.190149	9.87633	-0.164232	0.0548854	0.997375	11.0866	-0.137037	0.156703	0.985937	Yes	Yes	Yes	Yes
O60942	RNGTT	15	15	1	1.05285	1.04995	1.03041	0.993904	0.840346	0.680682	0.415498	0.274454	0.187736	0.128272	0.108632	0.0678638	0.0704364	0.0771771	0.0697613	1	1.00288	1.01487	0.988401	0.935001	0.847869	0.624749	0.408157	0.279766	0.181207	0.138252	0.102202	0.0756693	0.0609917	0.0613926	0.0650497	9.56733	-0.195742	0.0413144	0.996658	9.44507	-0.183496	0.0236739	0.999329	Yes	Yes	Yes	Yes
O75027-2	ABCB7	11	11	1	1.02048	1.01225	0.980036	0.947773	0.784527	0.629715	0.411769	0.286211	0.197424	0.147777	0.117117	0.0999909	0.0901057	0.0938676	0.0935019	1	1.01564	1.01144	1.02592	0.887053	0.814352	0.628134	0.433973	0.313536	0.232647	0.164883	0.153811	0.132312	0.113192	0.122651	0.108012	9.37377	-0.17349	0.0423064	0.998668	9.49329	-0.160524	0.0569765	0.997334	Yes	Yes	Yes	Yes
O75044	SRGAP2	17	17	1	0.995525	0.997239	1.0113	0.958501	0.84068	0.690549	0.477974	0.313708	0.186598	0.116992	0.0933936	0.0775139	0.0840418	0.0738448	0.0716223	1	0.998675	0.988146	1.04151	0.952811	0.84885	0.72724	0.494672	0.335353	0.220747	0.143297	0.110761	0.0887831	0.083669	0.0793629	0.0778068	9.74992	-0.18083	0.0231498	0.998241	9.93968	-0.173473	0.026315	0.997635	Yes	Yes	Yes	Yes
O75052	NOS1AP	5	7	1	1.01066	0.999419	1.02069	1.00223	0.917683	0.86797	0.744534	0.682354	0.593426	0.584406	0.547512	0.48694	0.403748	0.466262	0.426252	1	1.07237	1.06812	1.08325	1.01455	0.993104	0.874165	0.739865	0.656961	0.593198	0.468779	0.436648	0.398205	0.373949	0.387735	0.312572	15.669	-0.0726186	0.331046	0.990482	13.4989	-0.0951249	0.277252	0.982663	Yes	Yes		Yes
O75054	IGSF3	19	14	1	1.03789	1.02102	1.02109	1.00318	0.945719	0.845727	0.803251	0.695967	0.628725	0.554426	0.448516	0.35167	0.280736	0.17186	0.103869	1	1.01541	1.04819	1.01716	0.983966	0.936271	0.83165	0.74091	0.651175	0.552022	0.453243	0.398532	0.322955	0.258283	0.169162	0.100186	13.6713	-0.0950334	0	0.983982	12.8713	-0.0971952	0	0.991114	Yes	Yes	Yes	Yes
O75056	SDC3		1																	1	1.11012	1.10958	1.00617	0.956158	1.17314	0.95357	0.858985	0.670454	0.510955	0.510435	0.395152	0.312202	0.382728	0.264884	0.210972					13.1406	-0.121861	0.228501	0.955807		Yes		Yes
O75061-2	DNAJC6	3	2	1	1.03963	0.997699	1.05063	1.06906	0.966085	0.800323	0.735805	0.576919	0.416963	0.303399	0.261535	0.22674	0.199222	0.177685	0.090995	1	1.04746	1.19334	1.04043	1.04753	0.959871	0.855636	0.70463	0.798935	0.382121	0.265036	0.21723	0.147361	0.145704	0.123285	0.0855399	11.7706	-0.125052	0.0464065	0.991574	12.0461	-0.144986	0.0170305	0.961645	Yes	Yes	Yes	Yes
O75063	FAM20B	9	5	1	1.0499	0.970478	1.00023	0.985425	0.841461	0.727149	0.486387	0.350237	0.236673	0.183685	0.129619	0.0925745	0.0808504	0.0799432	0.0681418	1	1.02767	1.00575	0.97975	0.892416	0.836951	0.692754	0.530636	0.38332	0.24433	0.190776	0.143831	0.100428	0.0828597	0.110694	0.089699	9.9974	-0.163097	0.0172528	0.997418	10.0359	-0.145326	0	0.995811	Yes	Yes	Yes	Yes
O75064	DENND4B	2	3	1	1.00336	1.07208	0.957944	0.939557	0.912772	0.791896	0.516891	0.382884	0.256422	0.242282	0.180858	0.125167	0.0928016	0.113244	0.0856525	1	0.971517	0.908362	0.922526	0.843972	0.790945	0.740715	0.490654	0.330777	0.202791	0.167139	0.111992	0.080931	0.0700056	0.0810822	0.0784764	10.3408	-0.164498	0.0598932	0.993825	9.80024	-0.155984	0	0.981588	Yes	Yes	Yes	Yes
O75071	EFCAB14	6	8	1	1.01892	1.05137	1.04485	1.0521	0.927984	0.834299	0.853478	0.710883	0.65466	0.607739	0.611059	0.582059	0.501925	0.560118	0.699284	1	1.0412	1.03585	1.04069	0.999663	0.954054	0.833612	0.719289	0.583592	0.528029	0.434672	0.389115	0.383363	0.357862	0.392132	0.376817		-0.0786921	0.565775	0.933411	12.4954	-0.115133	0.337066	0.993511	Yes	Yes
O75074	LRP3		1																	1	0.910865	0.941783	1.00582	0.908257	0.916368	0.765319	0.757661	0.651327	0.699869	0.641349	0.498072	0.574228	0.580081	0.69663	0.6957						-0.0803702	0.604409	0.860185		Yes
O75083	WDR1	56	58	1	0.994465	0.983498	0.984204	0.99642	0.913108	0.767793	0.531056	0.337104	0.189401	0.121034	0.0784425	0.0469351	0.0381298	0.0303071	0.0247754	1	1.00309	0.976439	0.993245	0.982743	0.916404	0.770888	0.583093	0.371405	0.23027	0.14553	0.102649	0.0616954	0.0493835	0.047879	0.0475758	10.1478	-0.196748	0	0.999509	10.3652	-0.180228	0	0.999152	Yes	Yes	Yes	Yes
O75093	SLIT1	9		1	0.983638	0.968868	0.978871	0.979977	0.908387	0.844138	0.820933	0.736234	0.706699	0.678402	0.706391	0.731353	0.622459	0.702792	0.611786																		-0.0502349	0.612893	0.958443					Yes
O75096	LRP4	4	7	1	1.02288	1.2255	1.12811	1.05203	1.04534	0.884465	0.699904	0.572902	0.464783	0.425495	0.355186	0.309872	0.251517	0.165642	0.113494	1	0.987371	1.02881	1.06166	0.934564	0.854778	0.802452	0.611612	0.477307	0.316638	0.278499	0.198373	0.145665	0.104336	0.0669143	0.0631787	12.3916	-0.108764	0.0447307	0.957159	10.8638	-0.136795	0	0.993831	Yes	Yes	Yes	Yes
O75110	ATP9A	8	9	1	0.966196	0.985734	0.923576	0.856919	0.727778	0.564409	0.371979	0.260047	0.183603	0.132342	0.116787	0.0974554	0.0828926	0.0682008	0.0394659	1	0.924914	0.886464	0.860101	0.853329	0.694289	0.517282	0.340183	0.2444	0.166525	0.137218	0.0958666	0.0884932	0.064022	0.0457582	0.0379112	8.94081	-0.160269	0	0.996386	8.65051	-0.164867	0	0.983883	Yes	Yes	Yes	Yes
O75113	N4BP1	19	16	1	0.977894	0.98873	0.990474	0.953331	0.88353	0.780649	0.634026	0.513226	0.386068	0.309359	0.27286	0.242562	0.209635	0.233359	0.24459	1	0.939773	0.938218	0.949442	0.928153	0.876014	0.758005	0.613573	0.485591	0.365874	0.279267	0.222811	0.179579	0.157222	0.159384	0.153921	11.1215	-0.126466	0.156009	0.99625	10.9232	-0.121872	0.0295441	0.99225	Yes	Yes	Yes	Yes
O75116	ROCK2	78	70	1	1.00736	1.01827	1.0111	0.999257	0.955721	0.844355	0.702383	0.514208	0.300835	0.1691	0.119296	0.0949421	0.0829095	0.0765778	0.0815948	1	1.01258	0.994957	1.0117	1.01643	0.947908	0.855756	0.723757	0.539088	0.352478	0.199523	0.128615	0.0958193	0.0808905	0.0846534	0.0829597	11.0917	-0.181493	0.0301388	0.997485	11.3058	-0.170947	0.0210338	0.997291	Yes	Yes	Yes	Yes
O75121	MFAP3L		2																	1	1.02339	0.978913	1.04429	1.03418	0.958459	0.889403	0.726708	0.648491	0.565941	0.46749	0.417251	0.342206	0.301885	0.343128	0.23093					13.2044	-0.0930224	0.147884	0.991941		Yes		Yes
O75128-2	COBL		1																	1	1.16592	1.01848	1.06077	0.94962	0.901681	0.749471	0.648813	0.436092	0.294151	0.251251	0.245919	0.199386	0.142169	0.164583	0.184579					10.6954	-0.148148	0.116032	0.981068		Yes		Yes
O75131	CPNE3	48	42	1	0.980618	0.966912	0.98237	1.00017	0.969523	0.863127	0.803949	0.663193	0.458709	0.226073	0.110588	0.0553324	0.0531435	0.0420843	0.0300584	1	0.992436	0.965309	0.988957	1.00221	0.958917	0.846844	0.782526	0.652062	0.506509	0.310077	0.1563	0.068545	0.0542271	0.0391085	0.0314765	11.9396	-0.188172	0	0.992329	12.0596	-0.165435	0	0.989551	Yes	Yes	Yes	Yes
O75140	DEPDC5	5	4	1	1.09451	1.00334	1.00798	0.951197	0.822845	0.681245	0.52786	0.360508	0.255265	0.182727	0.176205	0.138672	0.130498	0.10667	0.0796894	1	1.05872	1.06474	0.968177	0.937966	0.863775	0.7853	0.5385	0.421072	0.288453	0.231274	0.195338	0.14525	0.137129	0.0657637	0.0808387	10.0007	-0.146487	0.0254209	0.994929	10.5021	-0.139023	0.00210055	0.993404	Yes	Yes	Yes	Yes
O75143-5	ATG13	6	3	1	1.06435	1.04255	1.04425	1.07948	1.17179	0.876425	0.768721	0.643906	0.537122	0.494432	0.444283	0.423652	0.341342	0.405635	0.430627	1	1.07312	1.08465	0.96615	1.05945	0.940753	0.814026	0.686752	0.62105	0.451319	0.30359	0.267757	0.263061	0.220215	0.243736	0.239838	13.0088	-0.129346	0.389893	0.956446	11.7413	-0.127489	0.162063	0.98324	Yes	Yes		Yes
O75144-2	ICOSLG	4	2	1	1.02842	0.949495	0.935548	0.899965	0.928154	0.81839	0.786915	0.736532	0.747332	0.733541	0.684075	0.708701	0.637766	0.968634	1.07045	1	0.890386	0.917592	0.857292	1.01014	0.891297	0.767552	0.772925	0.633549	0.663105	0.532677	0.555937	0.618992	0.60091	0.862109	0.851406		-0.0609367	0.785079	0.372888		-0.119535	0.669214	0.571579	Yes	Yes
O75145	PPFIA3	2	4	1	0.870166	1.03499	0.936892	0.966424	0.958706	0.755715	0.588257	0.468845	0.402515	0.369826	0.367305	0.284087	0.257516	0.274866	0.299132	1	0.990155	1.02645	0.976777	0.956971	0.792527	0.642519	0.471197	0.337984	0.260773	0.192081	0.178996	0.135317	0.132188	0.169759	0.120608	10.9342	-0.14131	0.263236	0.979056	9.66513	-0.154334	0.0785444	0.997843	Yes	Yes	Yes	Yes
O75146	HIP1R	40	32	1	1.00722	1.00076	0.998009	0.94973	0.832781	0.671566	0.458421	0.315202	0.196998	0.13428	0.0982266	0.0709649	0.0629173	0.0563352	0.0595112	1	0.996001	0.986505	0.98848	0.938383	0.863536	0.671945	0.465812	0.308799	0.210641	0.141263	0.0997361	0.0634474	0.0455746	0.0388383	0.0382293	9.69411	-0.171059	0	0.999217	9.75105	-0.175091	0	0.99926	Yes	Yes	Yes	Yes
O75150	RNF40	48	33	1	0.994246	0.99616	0.981023	0.974577	0.934125	0.825633	0.758773	0.655967	0.602463	0.577288	0.517297	0.488966	0.382318	0.20248	0.061926	1	1.03497	0.994341	0.987641	0.993815	0.970322	0.88299	0.801089	0.708959	0.623966	0.560667	0.511063	0.504611	0.435419	0.205075	0.0451902	13.9632	-0.080531	0	0.948342	14.3661	-0.0837089	0	0.949767	Yes	Yes	Yes	Yes
O75151	PHF2	4	1	1	1.06629	1.00574	1.06589	1.0006	0.814421	0.784821	0.589146	0.44653	0.411099	0.385537	0.324028	0.321142	0.283164	0.303007	0.366304	1	1.04672	1.07749	1.07849	1.04026	0.962049	0.759067	0.501098	0.405768	0.349309	0.178704	0.153432	0.144193	0.147769	0.127915	0.126013	10.8754	-0.133545	0.285112	0.983351	10.3428	-0.173409	0.100838	0.98831	Yes	Yes	Yes	Yes
O75152	ZC3H11A	8	5	1	1.00201	1.04394	1.00396	0.933085	0.810305	0.611434	0.41677	0.315158	0.232882	0.190108	0.15002	0.150389	0.138824	0.153635	0.169365	1	0.959322	0.952987	0.943255	0.827067	0.716131	0.522267	0.34048	0.21044	0.138336	0.094247	0.0752113	0.068066	0.0537479	0.0781898	0.0789446	9.38387	-0.176103	0.115525	0.997702	8.65777	-0.174434	0	0.993532	Yes	Yes	Yes	Yes
O75153	CLUH	74	59	1	1.00106	0.994821	1.0024	0.986442	0.938306	0.828967	0.715202	0.558841	0.426442	0.306469	0.19789	0.119545	0.100618	0.0814271	0.0744636	1	1.01731	0.986713	0.996497	1.00146	0.954391	0.830149	0.693648	0.564886	0.446809	0.346225	0.240837	0.133406	0.0804912	0.0538143	0.0504512	11.5827	-0.139916	0	0.997263	11.6722	-0.136907	0	0.993826	Yes	Yes	Yes	Yes
O75157	TSC22D2	3	3	1	0.99789	1.13474	1.08125	1.01293	0.948436	0.912121	0.800011	0.659215	0.51857	0.472778	0.368917	0.280295	0.214489	0.150947	0.118196	1	1.23313	1.27976	1.15797	1.08453	1.07057	1.02535	0.929934	0.743744	0.532732	0.459932	0.391065	0.247254	0.217931	0.161534	0.0626305	12.9418	-0.107857	0	0.98442	13.3401	-0.129271	0.0243516	0.930057	Yes	Yes	Yes	Yes
O75161	NPHP4		1																	1	0.880065	0.796761	0.902408	0.808553	0.610515	0.534101	0.362204	0.327917	0.167004	0.109532	0.112207	0.0589716	0.056557	0.100928	0.0863085					8.4945	-0.152565	0	0.958889		Yes		Yes
O75164	KDM4A	13	8	1	1.0537	0.995591	1.03168	0.957224	0.842741	0.719474	0.549714	0.392515	0.258045	0.195598	0.14541	0.131481	0.0945269	0.0861273	0.0636559	1	1.00369	1.077	1.01697	1.03434	0.940263	0.762112	0.533955	0.394545	0.293133	0.194513	0.154703	0.12071	0.0933043	0.102019	0.118257	10.2304	-0.147316	0	0.997323	10.361	-0.17297	0.0701407	0.995398	Yes	Yes	Yes	Yes
O75165	DNAJC13	42	43	1	0.969638	0.97468	0.956412	0.904712	0.763996	0.569411	0.318765	0.202662	0.126034	0.0943876	0.0814717	0.0686116	0.0654238	0.0656401	0.0618893	1	1.00114	0.975223	0.946483	0.919427	0.765061	0.563561	0.348796	0.219799	0.141975	0.105824	0.0756899	0.0656764	0.0560394	0.0498903	0.049175	8.89987	-0.201162	0.0265923	0.996965	8.98169	-0.188298	0.00715692	0.998353	Yes	Yes	Yes	Yes
O75167-4	PHACTR2	3	3	1	1.08779	1.02958	1.00281	0.980163	0.980706	0.844891	0.810807	0.768286	0.631974	0.571254	0.400471	0.39158	0.285338	0.227395	0.284986	1	0.985019	1.03104	0.946859	0.969726	0.954305	0.8508	0.686194	0.632147	0.616626	0.481861	0.394346	0.359364	0.335931	0.248625	0.288538	14.1149	-0.0843638	0	0.979628	13.3169	-0.0823896	0.0592719	0.987072	Yes	Yes	Yes	Yes
O75170-5	PPP6R2	22	15	1	1.04251	1.00117	0.997102	0.955629	0.869457	0.727457	0.54827	0.419035	0.299182	0.234191	0.175063	0.135644	0.115396	0.109594	0.11177	1	1.02244	0.992988	1.00177	0.95464	0.843489	0.715147	0.577282	0.423793	0.335874	0.25337	0.198335	0.143783	0.143635	0.125591	0.139288	10.3929	-0.141075	0.0253976	0.998517	10.4942	-0.130105	0.0246546	0.998106	Yes	Yes	Yes	Yes
O75175	CNOT3	11	14	1	0.977957	0.98926	0.982853	0.909982	0.846702	0.685862	0.528216	0.41623	0.316968	0.268478	0.240051	0.22773	0.196106	0.230468	0.250142	1	1.00705	0.994852	0.971316	0.972379	0.894129	0.753859	0.595085	0.442017	0.332689	0.236374	0.199605	0.185412	0.170167	0.188668	0.173141	10.1492	-0.141856	0.170756	0.995388	10.6002	-0.148375	0.118053	0.997895	Yes	Yes	Yes	Yes
O75177	SS18L1		1																	1	0.872985	0.895424	0.854384	0.824265	0.662621	0.595025	0.435174	0.386875	0.298239	0.235647	0.219415	0.26259	0.19829	0.24455	0.323619					9.13909	-0.118663	0.115071	0.954197		Yes		Yes
O75179	ANKRD17	30	23	1	0.973422	0.981146	0.970063	0.932159	0.830163	0.678884	0.492953	0.373072	0.269504	0.209933	0.158707	0.128806	0.1095	0.113349	0.110772	1	0.996105	0.953951	1.00232	0.901358	0.799287	0.684881	0.495344	0.369973	0.270015	0.190812	0.151067	0.11835	0.0927145	0.0887745	0.0784948	9.95617	-0.144554	0.0271885	0.998379	9.90083	-0.142488	0	0.996947	Yes	Yes	Yes	Yes
O75182	SIN3B	10	6	1	1.01931	1.0169	0.986713	1.00426	0.894417	0.735206	0.50874	0.371122	0.260792	0.197823	0.152602	0.108336	0.0919717	0.0865883	0.0779531	1	0.974097	0.983071	1.03252	0.927958	0.788722	0.695404	0.542155	0.371873	0.285955	0.210623	0.164226	0.130696	0.116048	0.109128	0.1056	10.1798	-0.164819	0.0387044	0.999083	10.0797	-0.135746	0	0.996248	Yes	Yes	Yes	Yes
O75190	DNAJB6	6	4	1	1.03127	0.917518	0.911256	0.87393	0.803604	0.603862	0.441475	0.299572	0.207586	0.14616	0.105228	0.075685	0.0576954	0.0497064	0.0514416	1	0.995528	0.966507	0.970366	0.955141	0.825842	0.647896	0.481553	0.360409	0.253442	0.169826	0.126691	0.0770237	0.064485	0.0482294	0.0490813	9.38497	-0.161707	0	0.991327	9.80737	-0.156828	0	0.99797	Yes	Yes	Yes	Yes
O75191	XYLB	7	8	1	0.95399	1.01856	1.00698	1.00281	0.899533	0.819859	0.613836	0.438747	0.27483	0.190546	0.165011	0.13073	0.0998771	0.0900732	0.102607	1	0.976268	0.970249	0.963201	0.965522	0.943011	0.772389	0.608714	0.446455	0.309897	0.22289	0.152889	0.0958252	0.0835041	0.0685193	0.0579578	10.6821	-0.16786	0.0520694	0.997349	10.7385	-0.152963	0	0.997958	Yes	Yes	Yes	Yes
O75197	LRP5		2																	1	1.11342	1.10452	1.0507	1.10379	0.998114	0.707525	0.487007	0.399005	0.248668	0.177767	0.156427	0.101775	0.0834278	0.0862594	0.0839508					10.1666	-0.185345	0.0653962	0.981632		Yes		Yes
O75204	TMEM127	1	2	1	1.10758	1.06836	1.14181	1.1094	0.955581	0.748029	0.623035	0.415006	0.391177	0.298756	0.259288	0.228242	0.199875	0.157841	0.221278	1	0.95543	1.01225	0.967977	0.806775	0.754314	0.567518	0.361536	0.301474	0.217906	0.17558	0.127621	0.0767581	0.0558146	0.0870161	0.110741	10.787	-0.15276	0.171219	0.97325	9.01289	-0.150536	0	0.992198	Yes	Yes	Yes	Yes
O75208	COQ9	17	12	1	1.04291	0.992926	1.00454	0.980914	0.957552	0.876495	0.868615	0.763516	0.75929	0.71922	0.710514	0.724436	0.604749	0.579876	0.290919	1	0.961827	0.961758	0.975257	0.98505	0.933809	0.865119	0.827338	0.739847	0.70195	0.632551	0.611757	0.669537	0.641816	0.602436	0.212745	19.8524	-0.0464739	0	0.903528	18.7299	-0.0483959	0	0.861139	Yes	Yes	Yes	Yes
O75223	GGCT	27	21	1	0.959982	0.97663	0.986528	1.00809	0.977347	0.892354	0.874964	0.819892	0.777858	0.770882	0.799085	0.835296	0.761114	1.02552	1.305	1	1.03042	1.00075	0.987063	1.00678	0.986595	0.874281	0.799798	0.752639	0.653705	0.628721	0.587044	0.669884	0.671029	0.843756	0.924909		-0.108585	0.885641	0.123487		-0.114194	0.715527	0.74519	Yes	Yes
O75251	NDUFS7	6	4	1	1.03504	0.949981	0.919597	0.847898	0.784925	0.560246	0.367718	0.22583	0.132148	0.0803308	0.0538181	0.0361833	0.0284245	0.0312307	0.0258857	1	0.997104	0.977247	0.986877	0.938389	0.779081	0.610543	0.420699	0.253301	0.150596	0.100434	0.0583137	0.0373555	0.0272547	0.0276841	0.0220758	8.97204	-0.191067	0	0.992041	9.27612	-0.189079	0	0.997803	Yes	Yes	Yes	Yes
O75298	RTN2	2	3	1	1.1408	1.16288	1.17221	1.10063	1.06533	0.922895	0.717474	0.536122	0.456714	0.438689	0.298648	0.201993	0.211259	0.141877	0.113491	1	0.948333	1.04241	1.04012	1.0215	0.861087	0.760638	0.698754	0.576766	0.539043	0.380843	0.354826	0.319813	0.244311	0.152912	0.123199	12.1188	-0.126633	0.0644859	0.954762	12.1742	-0.0967937	0	0.984572	Yes	Yes	Yes	Yes
O75306	NDUFS2	34	26	1	0.969002	0.962444	0.953477	0.922438	0.839832	0.684731	0.493392	0.350211	0.248481	0.173106	0.131527	0.102885	0.0873681	0.0757429	0.0506232	1	0.989243	0.973567	0.93951	0.921973	0.856739	0.67771	0.499989	0.345213	0.245972	0.180621	0.138838	0.108828	0.0863747	0.071738	0.0538576	9.90594	-0.153216	0	0.997374	9.92779	-0.152879	0	0.997593	Yes	Yes	Yes	Yes
O75312	ZNF259	32	28	1	1.01578	1.00219	0.979633	1.00874	0.95891	0.859347	0.862336	0.77337	0.742332	0.74922	0.719775	0.768183	0.668482	0.792359	0.730103	1	1.04593	1.00576	0.993413	1.01637	0.998113	0.878414	0.808815	0.713354	0.687587	0.617872	0.587853	0.638396	0.610447	0.700138	0.594104		-0.0596493	0.726849	0.943107		-0.0911523	0.617171	0.970738	Yes	Yes
O75317	USP12		2																	1	1.0655	0.918937	1.0522	0.932738	0.949784	0.755836	0.555037	0.488597	0.20151	0.240801	0.182246	0.126583	0.189156	0.0507909	0.0484357					10.5651	-0.151568	0.024658	0.982215		Yes		Yes
O75319	DUSP11	4	4	1	1.03213	1.00425	1.00045	0.963281	0.790731	0.566362	0.400459	0.267116	0.194847	0.138522	0.140354	0.131628	0.100717	0.0801687	0.0946257	1	1.05651	1.09665	1.01037	0.973697	0.851343	0.653324	0.459521	0.323317	0.215565	0.190272	0.161089	0.175649	0.134036	0.158265	0.166779	9.19519	-0.183018	0.0649642	0.998893	9.62448	-0.185873	0.127588	0.993327	Yes	Yes	Yes	Yes
O75323	GBAS	8	5	1	0.97792	0.94574	0.938031	0.926101	0.836938	0.648536	0.359296	0.229726	0.129865	0.0844791	0.0601538	0.0514928	0.0398862	0.0421292	0.0429586	1	1.03528	0.917186	1.01391	0.911043	0.801543	0.657396	0.449245	0.255376	0.164015	0.121846	0.0777944	0.0642575	0.045585	0.0472172	0.041213	9.30352	-0.209847	0.0109693	0.9955	9.47275	-0.180292	0	0.994083	Yes	Yes	Yes	Yes
O75326	SEMA7A	1	1	1	1.2158	1.00512	0.956464	1.1187	0.826284	0.846372	0.817556	0.733298	0.427244	0.49122	0.387982	0.210481	0.245273	0.162719	0	1	0.935532	1.02772	1.07101	0.891083	0.889068	0.925056	0.795781	0.779298	0.602815	0.425308	0.355897	0.192243	0.137487	0.105574	0.108841	12.7927	-0.112364	0	0.938313	13.0887	-0.128834	0	0.975684	Yes	Yes	Yes	Yes
O75330-3	HMMR	32	29	1	1.02047	0.979623	0.98472	0.969433	0.860801	0.689193	0.437876	0.267413	0.140325	0.0893804	0.0660504	0.0551426	0.0544994	0.0534355	0.0561244	1	0.987228	0.978326	0.970565	0.977984	0.878134	0.697623	0.485379	0.287997	0.157972	0.101771	0.0836069	0.0718279	0.0614059	0.0665941	0.0639722	9.60824	-0.207456	0.0192152	0.998491	9.76826	-0.200795	0.0279016	0.998275	Yes	Yes	Yes	Yes
O75334	PPFIA2		6																	1	1.02599	0.942598	0.923464	0.892751	0.825337	0.675416	0.478718	0.350882	0.231831	0.158208	0.126058	0.101564	0.0976782	0.0975648	0.0892005					9.77874	-0.150175	0.00194454	0.992951		Yes		Yes
O75340	PDCD6	17	21	1	0.958446	0.993842	0.967302	0.954121	0.913287	0.813656	0.72866	0.623989	0.58613	0.582171	0.600114	0.627405	0.539944	0.723453	0.905704	1	1.01004	0.990073	0.968864	0.959937	0.932421	0.812284	0.708511	0.614961	0.546489	0.518409	0.502415	0.545413	0.531616	0.655256	0.746736		-0.125699	0.649101	0.765455		-0.137398	0.57707	0.90702	Yes	Yes
O75342	ALOX12B	1	1	1	1.23153	0.800885	1.01536	1.40382	1.04723	0.902676	1.16422	1.30526	0.584163	0.574007	1.47055	0.852697	1.82644	1.24261	2.06119	1	1.27649	1.14034	1.07108	1.12579	0.958247	0.692482	0.750506	0.574653	0.385807	0.408121	0.288593	0.36448	0.327829	0.203887	0.239086		0	1.5	0.403039	11.7877	-0.115302	0.19193	0.922353	Yes	Yes		Yes
O75347	TBCA	24	19	1	0.994427	1.00575	0.952849	0.973686	0.940773	0.837904	0.794475	0.696545	0.639632	0.625649	0.633599	0.656005	0.591028	0.768519	0.942452	1	0.970555	0.990948	1.01654	1.01926	0.962676	0.88535	0.836499	0.735183	0.675147	0.620529	0.595249	0.648758	0.647555	0.784705	0.932177		-0.105757	0.694478	0.735814		-0.102033	0.701562	0.757163	Yes	Yes
O75348	ATP6V1G1	5	5	1	1.04414	0.919023	1.01065	0.965186	0.937409	0.826878	0.770112	0.622081	0.5383	0.459977	0.417467	0.377214	0.299159	0.35136	0.384943	1	1.00429	1.01986	0.998354	1.009	0.912803	0.852014	0.760656	0.59784	0.495349	0.404058	0.335461	0.280505	0.261063	0.286889	0.249837	12.9945	-0.0993137	0.27605	0.983459	12.3259	-0.112053	0.173686	0.99635	Yes	Yes	Yes	Yes
O75351	VPS4B	33	29	1	0.984568	0.98893	0.978641	0.992904	0.905647	0.771309	0.578578	0.423999	0.278331	0.190975	0.133829	0.0942133	0.0746842	0.0563235	0.0479903	1	0.978367	0.971977	0.953674	0.963186	0.868708	0.76079	0.593297	0.414459	0.285762	0.197628	0.135664	0.0823287	0.0589099	0.0373649	0.0335275	10.5317	-0.159893	0	0.999269	10.4853	-0.159263	0	0.996313	Yes	Yes	Yes	Yes
O75352	MPDU1	1	5	1	0.724049	0.976257	0.955839	0.691194	0.602909	0.723764	0.517057	0.369676	0.166851	0.179905	0	0	0.207361	0.245584	0	1	1.02652	1.07067	0.95081	1.028	0.897683	0.787514	0.547029	0.461933	0.338696	0.269164	0.178213	0.186218	0.169786	0.135552	0.14358	9.02934	-0.135965	0	0.868918	10.6722	-0.146162	0.0912985	0.992999	Yes	Yes	Yes	Yes
O75354	ENTPD6	4	1	1	0.988662	0.998958	0.942797	0.96722	0.847708	0.706351	0.486776	0.36149	0.26411	0.182617	0.139238	0.111979	0.104322	0.086204	0.0698985	1	1.49439	1.04636	1.30963	1.20312	0.886227	0.832542	0.775001	0.485062	0.274969	0.315435	0.310138	0.149298	0.146213	0.212716	0	10.0073	-0.153891	0.0149032	0.998199	11.394	-0.143667	0.0540354	0.868881	Yes	Yes	Yes	Yes
O75356	ENTPD5	1	4	1	1.25967	1.34774	1.05457	1.20814	0.949678	0.672793	0.715289	0.557674	0.412912	0.190099	0.291143	0.238947	0.178907	0.180975	0	1	0.993078	1.00097	0.908077	0.890889	0.810119	0.67654	0.514851	0.394787	0.262476	0.209678	0.180906	0.141781	0.119592	0.112672	0.085222	11.4272	-0.122688	0	0.900262	9.97907	-0.133543	0	0.994658	Yes	Yes	Yes	Yes
O75362	ZNF217	3	4	1	1.06484	1.01748	1.02937	0.939044	0.850278	0.716153	0.496579	0.331823	0.218818	0.167163	0.115818	0.0946522	0.0772443	0.0439363	0.0711149	1	0.946111	0.966572	0.977433	0.867581	0.795031	0.666839	0.458183	0.315603	0.207122	0.144518	0.112744	0.0861602	0.0625992	0.0535262	0.0666348	9.94331	-0.165293	0.00504437	0.996532	9.57213	-0.159777	0	0.993641	Yes	Yes	Yes	Yes
O75367	H2AFY	7	10	1	0.918932	0.948511	0.903278	0.883761	0.729497	0.598523	0.37924	0.295308	0.186354	0.177172	0.158212	0.34982	0.181993	0.337559	0.477169	1	0.980362	0.960281	0.93397	0.994308	0.741299	0.644524	0.492879	0.385344	0.246128	0.221338	0.196145	0.515152	0.275934	0.526414	0.658156	8.84812	-0.20535	0.256637	0.913773	9.36041	-0.20357	0.378281	0.82673	Yes	Yes	Yes
O75368	SH3BGRL	17	15	1	1.01133	1.0263	1.01534	1.03348	0.988518	0.920651	0.852273	0.772123	0.735872	0.738072	0.744227	0.749014	0.644997	0.841434	1.06393	1	0.934812	1.05119	0.980669	1.08643	1.12037	0.964828	0.689139	0.728277	0.736364	0.424183	0.561324	0.731211	0.767401	0.911775	0.821939		-0.0982202	0.78706	0.610721		-1.81692	0.707957	0.665782	Yes	Yes
O75369-8	FLNB	230	182	1	0.983506	0.988793	0.989416	0.989699	0.934513	0.853196	0.753345	0.624861	0.485384	0.372356	0.252331	0.152853	0.119967	0.0844264	0.0711785	1	0.979757	0.981887	0.992384	0.979497	0.924018	0.876916	0.754836	0.626862	0.496816	0.384358	0.28729	0.171302	0.114403	0.0826684	0.0659785	12.1039	-0.131928	0	0.995309	12.2184	-0.129578	0	0.994363	Yes	Yes	Yes	Yes
O75369	FLNB	2		1	1.10722	1.05602	1.05589	1.17181	1.03542	0.900337	0.81624	0.631389	0.613113	0.388754	0.249891	0.177669	0.0803103	0.0538275	9.8595e-05																	12.5957	-0.147552	0	0.972124					Yes		Yes
O75376	NCOR1	2	2	1	1.00956	0.946312	0.959222	1.00262	0.895917	0.796122	0.760203	0.57635	0.531225	0.390894	0.400755	0.299031	0.276916	0.263669	0.251602	1	1.02675	1.14927	1.04072	1.01249	1.13033	0.95223	0.779322	0.637076	0.529132	0.42787	0.407787	0.33323	0.342048	0.293362	0.36854	12.5415	-0.0937448	0.0951935	0.989757	12.5618	-0.141749	0.319905	0.967926	Yes	Yes	Yes
O75380	NDUFS6	8	8	1	0.937311	0.936411	0.934616	0.884479	0.832292	0.703833	0.658714	0.588949	0.602326	0.628226	0.662632	0.752239	0.65863	0.817916	1.03095	1	1.00548	0.961162	0.94328	0.91127	0.845562	0.714365	0.610839	0.54006	0.527306	0.493931	0.470763	0.575122	0.597571	0.772462	0.779198		-0.120357	0.711516	0.485455		-0.152358	0.593828	0.797749	Yes	Yes
O75381	PEX14	12	12	1	1.04694	1.02725	0.992788	1.00458	0.999275	0.887481	0.87999	0.734279	0.664331	0.610928	0.569956	0.534393	0.45279	0.428426	0.373887	1	1.01456	1.01412	1.01209	0.982338	0.941674	0.846535	0.754226	0.651196	0.583243	0.47662	0.459313	0.469498	0.43245	0.427862	0.311797	16.3538	-0.0655605	0.20017	0.989712	14.13	-0.0814035	0.274799	0.992059	Yes	Yes	Yes	Yes
O75382	TRIM3	6	4	1	0.959548	0.992305	0.988621	0.895854	0.755361	0.59168	0.368997	0.259775	0.188534	0.139653	0.120871	0.100205	0.0972009	0.0988814	0.0620169	1	0.985262	1.02073	0.950034	0.975756	0.819846	0.595857	0.438629	0.301287	0.199679	0.158959	0.11328	0.0860335	0.0884555	0.0758846	0.0683701	9.10051	-0.169796	0.0295198	0.997851	9.4648	-0.170334	0.0253676	0.998221	Yes	Yes	Yes	Yes
O75385	ULK1		1																	1	1.13377	1.33049	1.09664	0.989886	1.14578	0.566796	0.498045	0.491764	0.298673	0.341008	0.235122	0.263772	0.30571	0.344628	0.416565					8.87121	-0.766717	0.354494	0.897744		Yes
O75386	TULP3	3	2	1	0.961227	0.942065	0.925288	0.966407	0.833713	0.751322	0.561747	0.452059	0.345466	0.263254	0.222647	0.180042	0.173177	0.159532	0.0805988	1	0.980966	1.01779	1.05204	0.925351	0.935554	0.731927	0.5326	0.380486	0.298792	0.21444	0.13459	0.101677	0.0724706	0.0608001	0.0521548	10.6736	-0.120998	0	0.993009	10.346	-0.155025	0	0.996047	Yes	Yes	Yes	Yes
O75390	CS	38	37	1	0.981298	0.984948	0.946196	0.983938	0.934847	0.829178	0.746919	0.628114	0.491418	0.356172	0.19786	0.100324	0.0751865	0.0459964	0.0448941	1	0.996326	1.00592	0.994881	1.01776	0.940593	0.847109	0.75553	0.622352	0.512295	0.404538	0.282788	0.17244	0.106577	0.0971192	0.122798	11.9634	-0.145723	0	0.987771	12.2476	-0.12427	0	0.992684	Yes	Yes	Yes	Yes
O75391	SPAG7	16	14	1	0.99137	1.00353	0.998866	1.00371	0.948006	0.877916	0.812235	0.732726	0.704058	0.71354	0.691497	0.689451	0.618385	0.786698	1.01598	1	0.98017	0.991095	1.0233	0.975573	0.932921	0.874092	0.810943	0.717735	0.658794	0.638342	0.59803	0.673524	0.67546	0.803812	0.893937		-0.0965364	0.744222	0.672305		-0.0987357	0.706268	0.783898	Yes	Yes
O75394	MRPL33	3	2	1	1.20775	1.14598	1.13646	1.19423	1.03812	0.899547	0.651621	0.473383	0.435376	0.395315	0.352046	0.294825	0.266355	0.225826	0.252376	1	1.07718	1.08341	1.07714	1.08281	1.02876	0.787923	0.660198	0.464486	0.4139	0.322947	0.304867	0.235012	0.157995	0.140663	0.131444	11.35	-0.161251	0.261398	0.938329	11.3493	-0.134095	0.0950671	0.979929	Yes	Yes	Yes	Yes
O75396	SEC22B	20	11	1	0.997787	1.01623	0.982837	0.995538	0.923194	0.72492	0.544847	0.384734	0.249828	0.173121	0.138482	0.11146	0.0920023	0.0797054	0.0777222	1	1.03513	1.0221	0.978795	0.978619	0.87106	0.72443	0.51774	0.37063	0.241574	0.161444	0.120786	0.0812987	0.0667719	0.0547118	0.0458124	10.2531	-0.168745	0.0357769	0.999241	10.1207	-0.16466	0	0.998778	Yes	Yes	Yes	Yes
O75398	DEAF1	3		1	1.02414	1.09108	1.1577	1.06788	0.924085	0.821788	0.624192	0.520439	0.413615	0.271641	0.242516	0.171247	0.156105	0.114929	0.133944																	11.2797	-0.13337	0.046952	0.980818					Yes		Yes
O75400-3	PRPF40A	2	31	1	0.948235	0.920074	0.89648	0.813197	0.75375	0.586926	0.384637	0.29999	0.23628	0.191301	0.155254	0.138169	0.123047	0.140619	0.182557	1	0.952099	0.949443	0.97702	0.861696	0.746804	0.581677	0.413522	0.305764	0.213211	0.161165	0.133377	0.127712	0.104682	0.124317	0.132047	9.05762	-0.141565	0.043127	0.983362	9.16338	-0.152707	0.038904	0.994551	Yes	Yes	Yes	Yes
O75400	PRPF40A	34		1	0.947791	0.939427	0.932223	0.860385	0.750931	0.577167	0.379754	0.263703	0.203614	0.147944	0.12766	0.111393	0.0964338	0.106892	0.129134																	9.02659	-0.161619	0.040017	0.992143					Yes		Yes
O75410-2	TACC1		23																	1	1.003	0.995668	1.02134	0.983564	0.969434	0.892315	0.78924	0.742069	0.666039	0.599215	0.580794	0.575045	0.556951	0.669361	0.609474						-0.0868934	0.583132	0.975921		Yes
O75410	TACC1	26		1	1.01843	1.01696	1.01453	0.999741	0.952765	0.859001	0.803613	0.735016	0.692961	0.685067	0.671331	0.675878	0.593659	0.730679	0.796495																		-0.0849974	0.687636	0.925278					Yes
O75414	NME6		2																	1	0.858658	1.03101	1.0856	1.07191	0.888711	0.736675	0.556864	0.549766	0.447648	0.318159	0.288607	0.236139	0.227522	0.121293	0.0511787					11.316	-0.11187	0	0.969221		Yes		Yes
O75417	POLQ	4	1	1	1.07364	0.975784	0.973192	0.946008	0.799523	0.66004	0.539208	0.386487	0.347069	0.297285	0.259894	0.278052	0.233844	0.278603	0.253275	1	1.03791	1.00972	0.976609	0.971284	0.787912	0.606182	0.45394	0.401067	0.342117	0.294739	0.217406	0.247591	0.227943	0.262441	0.201318	10.0652	-0.137988	0.207775	0.993135	9.7046	-0.147524	0.193119	0.995299	Yes	Yes	Yes	Yes
O75419-3	CDC45	5	8	1	0.949548	0.933784	0.970405	0.850566	0.758267	0.60683	0.401844	0.270592	0.16103	0.106134	0.0876179	0.0612372	0.0568587	0.0455846	0.059212	1	0.993978	1.00925	1.00009	0.939191	0.793722	0.63167	0.445334	0.292001	0.197195	0.130154	0.0894455	0.0870749	0.0605467	0.0606426	0.058465	9.13981	-0.17078	0	0.99205	9.48321	-0.167985	0	0.998991	Yes	Yes	Yes	Yes
O75420	GIGYF1	4	3	1	0.971159	0.992673	0.972395	0.886168	0.876206	0.684608	0.525452	0.397528	0.292949	0.221609	0.202231	0.176043	0.14221	0.175184	0.201547	1	0.93269	1.05238	1.06599	0.990651	0.857315	0.6777	0.554439	0.4104	0.338469	0.21895	0.218009	0.177138	0.1574	0.193676	0.156249	10.0935	-0.14811	0.112425	0.993043	10.2749	-0.14337	0.106053	0.991273	Yes	Yes	Yes	Yes
O75425	MOSPD3	1		1	1.00424	0.930788	1.01287	0.914721	0.78015	0.659084	0.540836	0.3749	0.262819	0.25294	0.184341	0.157603	0.169697	0.117224	0.098748																	10.0086	-0.127673	0	0.994608					Yes		Yes
O75427	LRCH4	7	9	1	0.975471	1.06667	1.00374	0.939817	0.797098	0.653733	0.504536	0.354431	0.251875	0.205883	0.203354	0.189278	0.168704	0.163737	0.176602	1	1.02856	1.00781	0.995003	0.955206	0.836129	0.664041	0.558243	0.401976	0.287279	0.225301	0.217825	0.176979	0.160212	0.151331	0.15565	9.7584	-0.152925	0.115773	0.995125	10.1602	-0.139192	0.0804833	0.997718	Yes	Yes	Yes	Yes
O75431	MTX2	7	8	1	1.00038	1.00128	0.934993	0.96316	0.832304	0.641383	0.450343	0.303759	0.209058	0.162602	0.132469	0.1241	0.100435	0.130081	0.154865	1	0.962348	0.972384	0.994545	0.924928	0.79	0.58935	0.386721	0.298531	0.161277	0.132628	0.0844536	0.0809509	0.0705967	0.0834073	0.0848456	9.53902	-0.182377	0.0891229	0.99624	9.23025	-0.17735	0.0252481	0.997286	Yes	Yes	Yes	Yes
O75436	VPS26A	31	19	1	1.0148	1.02353	0.989269	0.978152	0.919119	0.762686	0.542592	0.393814	0.257548	0.175718	0.121184	0.0853267	0.0790531	0.0777253	0.0599247	1	0.990768	1.06445	0.985302	0.997294	0.907455	0.722841	0.480421	0.334048	0.215858	0.125017	0.0901547	0.05695	0.0528549	0.0535979	0.0372844	10.3447	-0.16858	0.0165965	0.999242	9.9778	-0.185413	0.00564184	0.997875	Yes	Yes	Yes	Yes
O75438	NDUFB1	2	2	1	1.14372	1.37787	1.24129	1.51721	1.18152	1.16689	1.0555	0.728325	0.643859	0.570549	0.622173	0.461038	0.461861	0.564962	0.597222	1	1.49435	1.22305	1.26441	1.26915	1.14889	1.08879	0.790933	0.65354	0.624917	0.503952	0.395428	0.379144	0.275219	0.267957	0.290767		-0.305116	0.556193	0.682185	13.3444	-0.121266	0.242885	0.811617	Yes	Yes		Yes
O75439	PMPCB	36	34	1	0.98789	0.96046	0.948886	0.939816	0.845176	0.659989	0.458833	0.295688	0.189892	0.130383	0.0977568	0.0690272	0.0612287	0.0570284	0.0566174	1	1.01958	0.974467	0.977484	0.928478	0.807315	0.660356	0.482045	0.309789	0.208679	0.156231	0.112965	0.0895775	0.0708123	0.0726658	0.0725666	9.64657	-0.174562	0.00256394	0.997686	9.6749	-0.159849	0	0.997976	Yes	Yes	Yes	Yes
O75446	SAP30	6	4	1	1.01906	0.952208	1.01537	0.987437	0.779079	0.62968	0.418444	0.29098	0.189589	0.146455	0.10687	0.0874805	0.0716953	0.0677124	0.0682066	1	0.96799	0.921063	0.994961	0.859068	0.739568	0.54355	0.372673	0.250095	0.180069	0.119834	0.0891011	0.0576462	0.0554113	0.06234	0.0481035	9.42528	-0.173405	0.0201602	0.997297	8.92509	-0.170152	0	0.995152	Yes	Yes	Yes	Yes
O75448	MED24	20	18	1	0.982852	0.979709	0.950328	0.934916	0.842642	0.650125	0.413051	0.270257	0.170465	0.122445	0.0836113	0.0705476	0.0601818	0.0645547	0.0586648	1	1.00695	0.989359	0.961965	0.937603	0.839096	0.633417	0.420648	0.28201	0.185431	0.128201	0.0896764	0.0744073	0.0502295	0.0588807	0.0525426	9.47483	-0.188238	0.0195111	0.997994	9.48727	-0.178453	0.006084	0.99903	Yes	Yes	Yes	Yes
O75449	KATNA1	10	11	1	1.0056	0.969915	0.933756	0.894095	0.759598	0.615585	0.432933	0.312491	0.224875	0.172538	0.139371	0.107431	0.108225	0.111404	0.09594	1	0.997344	0.996444	0.991265	0.844963	0.767698	0.572873	0.437615	0.312021	0.22918	0.160191	0.12406	0.109658	0.0884121	0.10314	0.111172	9.37989	-0.146975	0.0090586	0.996905	9.26711	-0.145921	0	0.9965	Yes	Yes	Yes	Yes
O75460	ERN1	5	1	1	1.15719	0.950785	0.943169	0.865401	0.790177	0.689615	0.498356	0.363541	0.259569	0.178513	0.165116	0.148884	0.119713	0.104526	0.108229	1	1.22446	1.14916	1.0692	1.08835	0.925712	0.6403	0.505371	0.335811	0.18254	0.122079	0.131572	0.0391939	0.0616714	0.042083	0.0939148	9.83947	-0.135572	0	0.982217	9.85908	-0.192295	0.031075	0.968659	Yes	Yes	Yes	Yes
O75461	E2F6	2	1	1	0.999193	1.04142	1.10904	0.968444	0.823186	0.67634	0.522863	0.320151	0.252564	0.209129	0.16946	0.118549	0.127038	0.0972973	0.0571887	1	0.988656	1.2121	0.997084	1.09237	0.695755	0.57367	0.463123	0.335095	0.203065	0.0720717	0.0647931	0.0966151	0.0646432	0	0	9.94413	-0.152104	0.0264457	0.992305	9.35049	-0.173873	0	0.967649	Yes	Yes	Yes	Yes
O75462	CRLF1		1																	1	0.895867	0.874776	0.875814	0.753607	0.764766	0.59515	0.525309	0.403837	0.297777	0.24264	0.21123	0.218178	0.0859154	0.136955	0.145727					9.52263	-0.116486	0	0.961166		Yes		Yes
O75467	ZNF324		1																	1	0.987891	0.966797	0.906972	0.903434	0.79483	0.585139	0.360213	0.262694	0.18602	0.117418	0.123411	0.112223	0.115892	0.132029	0.118852					9.08878	-0.189417	0.0789325	0.993174		Yes		Yes
O75475	PSIP1	16	18	1	0.970371	0.941002	0.942281	0.934326	0.826069	0.672171	0.519384	0.392137	0.318794	0.25183	0.211069	0.206422	0.166855	0.166732	0.176911	1	0.9582	0.951004	0.95183	0.90979	0.821871	0.68028	0.510824	0.393506	0.30717	0.230848	0.19439	0.192408	0.156549	0.15406	0.155496	10.0982	-0.134502	0.0937467	0.995261	10.0633	-0.133254	0.0638981	0.995274	Yes	Yes	Yes	Yes
O75477	ERLIN1	21	15	1	0.955783	0.929491	0.919624	0.843014	0.696011	0.505241	0.272281	0.174078	0.102198	0.0747077	0.0617768	0.052082	0.0467684	0.0521734	0.0542762	1	1.00518	0.92968	0.911612	0.850144	0.692464	0.492834	0.299658	0.18307	0.108349	0.0772524	0.0556091	0.0499542	0.0444036	0.0543408	0.0645333	8.47141	-0.193171	0	0.992092	8.48464	-0.189543	0	0.99335	Yes	Yes	Yes	Yes
O75478	TADA2A	2	2	1	1.16147	1.07526	1.0099	0.985066	0.929528	0.733823	0.544402	0.432128	0.280145	0.303762	0.229409	0.145444	0.142989	0.150137	0	1	0.973171	1.02917	1.03026	1.05255	1.00421	0.687214	0.643135	0.458531	0.316006	0.204346	0.181039	0.200268	0.18747	0.136537	0.126699	10.6332	-0.133319	0	0.979648	10.6841	-0.157525	0.103967	0.986948	Yes	Yes	Yes	Yes
O75486	SUPT3H		1																	1	0.943959	1.09966	1.08782	0.794246	0.776875	0.640144	0.394131	0.268574	0.202972	0.165913	0.133989	0.0332046	0.0324982	0	0.0750627					9.2575	-0.16556	0	0.978545		Yes		Yes
O75487	GPC4	4	6	1	1.07758	1.03293	1.04508	0.984402	0.929345	0.823445	0.694293	0.561175	0.527597	0.420383	0.374517	0.348854	0.292263	0.296886	0.247443	1	1.03134	0.976492	0.97069	0.937984	0.928635	0.852992	0.710527	0.620954	0.502897	0.463994	0.433265	0.391899	0.356868	0.409529	0.409516	12.4266	-0.0980073	0.164979	0.991941	12.8747	-0.106216	0.347554	0.990541	Yes	Yes	Yes
O75489	NDUFS3	9	11	1	0.990936	1.03819	0.989945	0.995255	0.864853	0.696806	0.474945	0.373305	0.259402	0.195692	0.152163	0.166162	0.12506	0.18272	0.207987	1	0.954761	1.00847	0.969615	0.918808	0.793847	0.635422	0.469375	0.338482	0.209248	0.160785	0.115555	0.119992	0.0908588	0.126295	0.137031	9.86953	-0.179972	0.136908	0.994886	9.56141	-0.159417	0.0462425	0.994723	Yes	Yes	Yes	Yes
O75493	CA11		1																	1	0.920111	0.749048	0.770764	0.785694	0.874618	0.916696	0.658052	0.407419	0.31644	0.280971	0.257366	0.269767	0.272131	0.254393	0.217004					10.7475	-0.220369	0.244218	0.861585		Yes		Yes
O75494	SRSF10	5	5	1	0.924332	1.02619	1.00104	0.874999	0.76318	0.607802	0.408113	0.320092	0.212501	0.170631	0.136402	0.125837	0.105125	0.100753	0.115171	1	0.983834	0.959739	0.912355	0.871782	0.738276	0.560145	0.410209	0.335807	0.23986	0.205649	0.165523	0.190524	0.156647	0.169237	0.214549	9.30107	-0.15334	0.0314378	0.994596	9.10141	-0.150537	0.112088	0.992023	Yes	Yes	Yes	Yes
O75496	GMNN	8	1	1	0.976861	1.0378	0.980719	0.964103	0.891691	0.869166	0.806562	0.639005	0.600435	0.572769	0.588061	0.731982	0.605464	0.755663	0.852683	1	0.923189	0.893412	0.882621	0.764402	0.810927	0.735515	0.656535	0.55557	0.390072	0.395948	0.448956	0.425106	0.431432	0.570813	0.51129		-0.104702	0.6692	0.781906	14.0165	-0.075393	0.27504	0.865773	Yes	Yes		Yes
O75503	CLN5	12	11	1	1.03572	1.11822	1.00097	1.06324	0.988236	0.884597	0.815354	0.706129	0.646976	0.620486	0.565369	0.487051	0.423055	0.316729	0.185245	1	1.05438	1.04851	1.06368	1.00639	0.97231	0.890164	0.842759	0.733222	0.655061	0.556404	0.524977	0.493736	0.415752	0.313321	0.152928	15.113	-0.0727744	0	0.965702	14.8767	-0.0767794	0	0.976708	Yes	Yes	Yes	Yes
O75506	HSBP1	6	2	1	1.52246	1.45594	1.2764	1.43866	1.50981	1.23169	1.40885	0.750582	0.831293	0.807027	1.10882	0.76299	1.05426	0.914947	1.79582	1	1.11144	1.12588	1.74625	1.44606	1.65703	0.940428	1.0263	0.99001	0.753885	1.152	0.628701	0.941628	0.705516	0.808373	1.80211		0.371824	1.5	0.0144422		0.383426	1.5	0.165156	Yes	Yes
O75509	TNFRSF21	5	5	1	1.01512	1.09631	0.965002	0.968895	0.909898	0.808999	0.778848	0.63567	0.69221	0.56298	0.53487	0.53075	0.583885	0.586957	0.492169	1	1.0689	1.05898	1.03075	1.06519	0.996031	0.876008	0.804905	0.686394	0.59328	0.537544	0.496062	0.466681	0.435048	0.441384	0.342397		-0.0696653	0.479519	0.959337	14.6426	-0.0860795	0.330136	0.982267	Yes	Yes
O75521	ECI2	25	22	1	0.965816	0.980763	0.985739	0.996971	0.938608	0.863665	0.813224	0.724876	0.66573	0.642789	0.596434	0.615824	0.520393	0.55206	0.353497	1	1.02938	1.05873	1.00161	1.0497	0.973152	0.881329	0.825315	0.715989	0.66296	0.582552	0.528665	0.57941	0.508904	0.542817	0.329085	18.2742	-0.0493474	0	0.970257	16.9622	-0.0625452	0.265017	0.963383	Yes	Yes	Yes	Yes
O75525	KHDRBS3	2	2	1	1.07097	1.02389	1.10679	1.0743	0.963633	0.81603	0.620043	0.402831	0.285277	0.196806	0.124825	0.087656	0.0721688	0.0560119	0.0290212	1	1.09135	0.922572	0.944918	0.956079	0.889883	0.732599	0.546478	0.434474	0.263898	0.199182	0.150982	0.0594492	0.0532853	0.0125766	0.0152537	10.7118	-0.174524	0.00821393	0.991442	10.3562	-0.161373	0	0.989108	Yes	Yes	Yes	Yes
O75528	TADA3	7	6	1	0.977651	0.969167	0.951248	0.923198	0.80683	0.632984	0.437376	0.33243	0.230911	0.163032	0.129813	0.117793	0.105881	0.104893	0.106978	1	1.01534	1.00391	1.04451	0.922495	0.787302	0.607529	0.468557	0.335752	0.221488	0.179111	0.122734	0.134399	0.110433	0.110355	0.101128	9.5463	-0.158191	0.0381892	0.997406	9.53709	-0.154073	0.0353522	0.997258	Yes	Yes	Yes	Yes
O75529	TAF5L	2	2	1	1.02722	0.890455	0.910811	0.871128	0.684163	0.531706	0.333953	0.191965	0.124062	0.0946272	0.0673882	0.0633086	0.0523134	0.0625931	0.0328623	1	0.947715	0.899057	0.866241	0.804418	0.63383	0.471079	0.334303	0.170099	0.112216	0.0816787	0.0659154	0.0714713	0.0539977	0.0620388	0.0622253	8.62988	-0.181997	0	0.990099	8.22185	-0.17613	0	0.985166	Yes	Yes	Yes	Yes
O75530	EED	14	16	1	0.964533	1.01591	1.01192	0.954072	0.848976	0.681659	0.452939	0.293049	0.17567	0.121751	0.085327	0.0628745	0.0566787	0.0444013	0.0385659	1	1.00394	1.00387	0.987952	0.958534	0.842435	0.687547	0.462706	0.309821	0.186976	0.131356	0.0922124	0.0658346	0.0483067	0.04053	0.0374285	9.6814	-0.182754	0	0.998823	9.73624	-0.178563	0	0.999336	Yes	Yes	Yes	Yes
O75531	BANF1	25	18	1	1.17586	1.23237	1.23324	1.21948	1.15435	1.01878	1.03672	0.843883	0.838684	0.83622	0.88132	0.977317	0.850684	1.05425	1.27959	1	1.22899	1.26506	1.33295	1.20925	1.19862	1.10171	1.02445	0.866347	0.870947	0.835439	0.803958	0.883511	0.857381	1.02416	1.08394		-0.0102722	0.960993	-0.025697		-0.115205	0.903091	0.117906	Yes	Yes
O75533	SF3B1	73	63	1	1.00734	1.0024	0.990696	1.01717	0.927013	0.794968	0.619029	0.458615	0.321169	0.219245	0.171886	0.126612	0.10433	0.0921417	0.087786	1	1.00482	0.996701	0.974247	0.980161	0.910279	0.77323	0.616316	0.452178	0.316562	0.218089	0.143046	0.106394	0.0741344	0.0614664	0.0570955	10.8291	-0.152408	0.0262323	0.99923	10.7395	-0.152596	0	0.998799	Yes	Yes	Yes	Yes
O75534-3	CSDE1	66	66	1	0.982192	0.957519	0.95854	0.968449	0.895767	0.730775	0.514195	0.340392	0.200009	0.124788	0.0834654	0.0567851	0.0483676	0.042525	0.0386242	1	0.977869	1.00076	0.977444	0.947121	0.891755	0.733524	0.53095	0.359738	0.227082	0.144983	0.0961004	0.0633249	0.0463527	0.0421715	0.0387893	10.038	-0.184473	0	0.99801	10.1296	-0.175619	0	0.998614	Yes	Yes	Yes	Yes
O75554	WBP4	12	7	1	1.00512	1.01398	1.01127	1.03395	0.977679	0.903328	0.846901	0.748216	0.701688	0.738852	0.709658	0.694985	0.591949	0.784571	0.999821	1	1.04602	1.02944	1.01534	1.02108	1.03546	0.903152	0.800772	0.749361	0.677653	0.628735	0.637177	0.675531	0.671248	0.780491	0.819482		-0.0959311	0.745107	0.699434		-0.11948	0.701056	0.899228	Yes	Yes
O75564	JRK		1																	1	0.96657	1.02186	0.88065	0.797364	0.75274	0.608746	0.397981	0.229422	0.187022	0.134561	0.0988662	0.107522	0.0925914	0.100524	0.0898765					8.99245	-0.153739	0	0.984885		Yes		Yes
O75569	PRKRA	16	11	1	0.983378	0.990189	0.962458	0.974109	0.793711	0.641534	0.474863	0.369075	0.276947	0.214255	0.170564	0.152119	0.122797	0.0953616	0.0769124	1	0.983924	0.980243	0.956207	0.935102	0.815947	0.624063	0.465138	0.354819	0.270921	0.221072	0.158304	0.153182	0.102866	0.103932	0.100707	9.85394	-0.138126	0.00507619	0.998501	9.75113	-0.141635	0.0202726	0.998596	Yes	Yes	Yes	Yes
O75570	MTRF1	3		1	0.993375	0.95654	0.929688	0.853071	0.750518	0.577499	0.368352	0.271668	0.201591	0.159164	0.163101	0.147144	0.112452	0.135481	0.0931045																	9.01732	-0.156888	0.0473175	0.99444					Yes		Yes
O75575	CRCP	1	2	1	0.982668	0.891967	0.740689	0.88727	0.782603	0.761277	0.71961	0.637291	0.487066	0.586354	0.494061	0.555361	0.446753	0.60372	0.65464	1	1.0693	1.08111	1.14058	0.995418	0.956182	0.800949	0.722642	0.719892	0.682681	0.562925	0.551364	0.589639	0.611006	0.641754	0.631884		-0.0565736	0	0.808884		-0.0939796	0.59849	0.926852	Yes	Yes
O75581	LRP6	2		1	1.01241	0.934628	0.974323	0.960889	0.835945	0.661012	0.4721	0.345417	0.236893	0.169718	0.141845	0.131209	0.0882474	0.0975371	0.0695953																	9.79884	-0.157339	0.0246299	0.997496					Yes		Yes
O75582	RPS6KA5	13	13	1	0.984578	0.990003	0.994355	0.888521	0.766632	0.585492	0.363708	0.243944	0.157286	0.111385	0.0956514	0.0743551	0.0613103	0.0433213	0.0533036	1	0.931159	0.959067	0.949064	0.894273	0.754867	0.576471	0.401096	0.29432	0.190898	0.141222	0.11746	0.0896538	0.0761297	0.059031	0.0432129	9.07228	-0.176603	0	0.998405	9.17055	-0.160481	0	0.995848	Yes	Yes	Yes	Yes
O75586	MED6	7	5	1	0.942815	0.920069	0.97566	0.901265	0.80868	0.695516	0.517851	0.371848	0.23278	0.165214	0.108963	0.0862327	0.0730791	0.0548631	0.0612478	1	0.971206	0.938524	1.01016	0.913416	0.859598	0.816245	0.634223	0.457758	0.309392	0.182321	0.133742	0.0904363	0.0759051	0.0560026	0.0650776	9.91461	-0.155591	0	0.991235	10.7631	-0.157453	0	0.99174	Yes	Yes	Yes	Yes
O75592	MYCBP2	17	24	1	0.940949	0.917234	0.914499	0.845949	0.68616	0.488064	0.280839	0.201662	0.137488	0.113134	0.0982001	0.0844292	0.0790675	0.086806	0.084732	1	0.999206	0.976852	0.97343	0.869816	0.730032	0.520669	0.347306	0.243795	0.176027	0.143623	0.122904	0.109596	0.0944747	0.104199	0.0974065	8.4399	-0.183333	0.0288836	0.991208	8.78995	-0.174647	0.048894	0.998734	Yes	Yes	Yes	Yes
O75600-2	GCAT	13	11	1	1.00878	0.989937	0.97733	0.934502	0.868808	0.674104	0.49998	0.360918	0.270232	0.215702	0.182243	0.135544	0.122125	0.0784373	0.0266578	1	1.00894	1.00461	1.02708	0.950778	0.842945	0.678676	0.486937	0.387953	0.30452	0.236346	0.192126	0.154432	0.128219	0.0894847	0.0508145	10.0534	-0.143478	0	0.998196	10.1275	-0.135603	0	0.998304	Yes	Yes	Yes	Yes
O75607	NPM3	4	11	1	0.98998	1.02981	1.04471	1.00781	1.03187	0.931164	0.864376	0.765853	0.587288	0.504806	0.423124	0.331276	0.240329	0.178899	0.10343	1	1.07928	1.06542	1.2522	1.14837	1.16553	1.08657	0.954268	0.835482	0.707521	0.529859	0.436125	0.398211	0.32964	0.223373	0.103535	13.7047	-0.108415	0	0.994325	14.4969	-0.113328	0.0373882	0.931772	Yes	Yes	Yes	Yes
O75608	LYPLA1	14	14	1	0.976467	0.954328	0.949366	1.01216	0.970549	0.848856	0.823281	0.721952	0.671049	0.655841	0.624413	0.663859	0.567237	0.633277	0.529481	1	0.965347	0.968575	0.971672	0.999436	0.98288	0.839306	0.752459	0.660205	0.616976	0.576121	0.531516	0.555949	0.545453	0.600343	0.436902		-0.062241	0.542483	0.963315		-0.0889692	0.504341	0.971932	Yes	Yes
O75616	ERAL1	13	10	1	0.948646	0.980439	0.967236	0.894765	0.791573	0.593372	0.363291	0.239358	0.134286	0.0973293	0.0772791	0.057194	0.0515589	0.0488314	0.0547782	1	0.993125	0.941158	0.945361	0.910045	0.763851	0.552899	0.365247	0.244148	0.136856	0.097652	0.0666396	0.0431967	0.0335743	0.0337518	0.0356783	9.1148	-0.186905	0.00157634	0.996526	8.9924	-0.187484	0	0.996723	Yes	Yes	Yes	Yes
O75629	CREG1	3	4	1	0.997799	1.13437	1.05535	0.991758	0.971564	0.913879	0.750373	0.66849	0.630377	0.632874	0.638421	0.563597	0.550155	0.681311	0.75884	1	0.918209	1.12217	0.979776	0.976784	0.957323	0.834523	0.759644	0.650034	0.55749	0.53524	0.48357	0.446636	0.490051	0.576743	0.586896		-0.144797	0.634842	0.909275		-0.112641	0.5051	0.943011	Yes	Yes
O75635	SERPINB7	1	1	1	0.978249	1.01904	0.930132	1.00866	0.921856	0.769069	0.610176	0.462533	0.255043	0.176662	0.0871362	0.062716	0.0511681	0.0523068	0	1	1.48723	1.17991	1.47281	1.61213	1.10816	1.04437	0.763875	1.1724	0.703916	1.01108	0.566793	0.564687	0.605847	0.743741	1.41968	10.6155	-0.174297	0	0.994509		-0.202903	0.802465	0.139415	Yes	Yes	Yes
O75643	SNRNP200	119	112	1	0.986251	0.971034	0.962957	0.911682	0.78979	0.585749	0.331471	0.200856	0.119171	0.0830703	0.065933	0.0593667	0.0508701	0.0533846	0.0540872	1	1.01407	0.977144	0.977982	0.928618	0.793361	0.605182	0.376994	0.22745	0.142366	0.100412	0.0781876	0.0705563	0.0623488	0.0673216	0.059395	9.00801	-0.207015	0.0175551	0.997462	9.16877	-0.194772	0.021853	0.998389	Yes	Yes	Yes	Yes
O75648	TRMU	20	15	1	0.97813	0.974292	0.968778	0.914025	0.778628	0.609573	0.40537	0.281792	0.192339	0.136362	0.112581	0.0938056	0.0823672	0.0762354	0.0645877	1	1.0123	0.972171	0.995263	0.885945	0.797986	0.594555	0.397559	0.279482	0.184762	0.141781	0.104766	0.0986111	0.0769776	0.0744028	0.0582191	9.29837	-0.165367	0.0100965	0.998567	9.26388	-0.166552	0.00856745	0.998256	Yes	Yes	Yes	Yes
O75663	TIPRL	17	17	1	0.985708	1.00618	0.99075	0.999168	0.965413	0.875287	0.767416	0.638545	0.474457	0.331765	0.197689	0.104707	0.0863395	0.0718382	0.0531238	1	1.01694	1.00973	1.0384	1.01901	0.974547	0.854304	0.782822	0.649167	0.497596	0.363935	0.244162	0.125268	0.0705853	0.0278362	0.033691	12.0425	-0.150585	0	0.995954	12.2025	-0.148809	0	0.991527	Yes	Yes	Yes	Yes
O75665	OFD1	1	3	1	1.12259	1.12568	0.987804	0.989583	0.824761	0.602967	0.351838	0.224552	0.13753	0.152002	0.103051	0.0762713	0.07818	0.104971	0.0675981	1	0.97787	1.05788	1.07346	1.05767	0.938295	0.709773	0.486491	0.377342	0.290832	0.220143	0.179784	0.209731	0.197544	0.203339	0.17183	9.17021	-0.219052	0.0666333	0.987976	9.99939	-0.193828	0.1769	0.991996	Yes	Yes	Yes	Yes
O75674	TOM1L1	13	11	1	0.99872	1.00849	0.99331	1.01699	0.943547	0.846426	0.843449	0.729802	0.692045	0.676165	0.677291	0.702485	0.606721	0.632964	0.410631	1	1.0019	1.00355	0.975786	1.06108	1.0049	0.847063	0.759314	0.720216	0.638177	0.582316	0.539116	0.567868	0.526982	0.593103	0.326538		-0.0402717	0	0.934034	17.5275	-0.0666357	0.365886	0.942938	Yes	Yes
O75676	RPS6KA4	8	3	1	0.950858	0.920351	0.93606	0.823311	0.680948	0.499099	0.276287	0.185971	0.123553	0.0970448	0.0755946	0.0564414	0.0667008	0.0624639	0.0542138	1	1.04698	1.07381	0.977435	0.935008	0.774874	0.55645	0.356439	0.237412	0.139408	0.10922	0.088255	0.0721379	0.042131	0.0596324	0.0635494	8.41929	-0.182053	0	0.992377	9.01952	-0.1912	0.0185253	0.996507	Yes	Yes	Yes	Yes
O75683	SURF6	12	3	1	0.965153	0.966899	0.970854	0.89198	0.782681	0.62172	0.431118	0.331964	0.266993	0.2188	0.191356	0.161871	0.121272	0.084335	0.0722082	1	0.989672	0.959142	0.964388	0.904982	0.805933	0.59647	0.447881	0.317411	0.26198	0.18065	0.154453	0.191638	0.14126	0.121543	0.126283	9.58127	-0.136067	0	0.997363	9.47091	-0.153595	0.0744391	0.996819	Yes	Yes	Yes	Yes
O75688-2	PPM1B	1		1	0.959623	0.936576	0.985968	0.863334	0.862446	0.789845	0.550422	0.596344	0.530938	0.507903	0.534204	0.61019	0.493947	0.550264	0.366137																	16.6856	-0.0817226	0.429498	0.919757					Yes
O75688	PPM1B	22	22	1	1.01118	0.996338	1.02978	0.99315	0.963571	0.884978	0.828176	0.708184	0.71344	0.703396	0.694124	0.712569	0.630144	0.696326	0.565866	1	0.973404	0.977355	1.00122	0.99414	0.953442	0.875625	0.801283	0.697943	0.641004	0.607797	0.59238	0.628996	0.571756	0.690592	0.463489		-0.0593519	0.622648	0.959266		-0.0765105	0.552516	0.946644	Yes	Yes
O75689	ADAP1	5	6	1	1.04214	1.04882	1.02421	1.03953	0.996699	0.874164	0.667993	0.528246	0.378123	0.310111	0.238635	0.189799	0.143023	0.112589	0.0890375	1	0.969645	0.96427	1.01526	0.965506	0.880958	0.730664	0.654349	0.507464	0.362777	0.306901	0.253192	0.195985	0.161387	0.128473	0.112634	11.4827	-0.141131	0.0476455	0.995188	11.1216	-0.117591	0	0.996695	Yes	Yes	Yes	Yes
O75691	UTP20	10	14	1	0.964801	0.954211	0.939683	0.860841	0.721368	0.491032	0.295043	0.194451	0.127135	0.0977656	0.0850743	0.0956785	0.0704527	0.0903123	0.111229	1	1.05069	1.01773	0.981015	0.9192	0.735027	0.569881	0.351156	0.230827	0.161759	0.142992	0.105893	0.142739	0.104664	0.161294	0.174606	8.54643	-0.1993	0.0483113	0.994389	8.87493	-0.200025	0.105866	0.993393	Yes	Yes	Yes	Yes
O75694	NUP155	55	52	1	0.993204	0.974036	0.963806	0.892085	0.765681	0.599571	0.371441	0.234676	0.138785	0.0891894	0.066782	0.0456871	0.0408248	0.0382166	0.0364154	1	1.01232	1.00609	0.982751	0.936867	0.815487	0.602024	0.386851	0.272815	0.17043	0.11001	0.0846481	0.0612874	0.0506287	0.0438076	0.0423443	9.0841	-0.187789	0	0.997006	9.30427	-0.181756	0	0.999517	Yes	Yes	Yes	Yes
O75695	RP2	5	8	1	0.99257	1.01864	0.962267	0.965472	0.907007	0.817763	0.685582	0.564127	0.429352	0.356516	0.292369	0.244462	0.19668	0.140454	0.0931193	1	1.02628	1.01458	0.993814	1.02273	0.976368	0.904178	0.768534	0.603628	0.514504	0.413235	0.37166	0.352769	0.275695	0.231049	0.164848	11.7815	-0.111385	0	0.997666	12.7456	-0.104633	0.0994274	0.995075	Yes	Yes	Yes	Yes
O75717	WDHD1	59	51	1	0.992296	0.96665	0.976393	0.942262	0.834058	0.666929	0.428426	0.291969	0.182097	0.134126	0.10227	0.08528	0.0778194	0.0871432	0.0965743	1	0.976396	0.998982	0.987109	0.922888	0.834063	0.650032	0.457827	0.30818	0.202749	0.142458	0.106661	0.097932	0.0848045	0.0954673	0.0963801	9.54621	-0.18581	0.0439352	0.997796	9.6014	-0.172148	0.0362604	0.998021	Yes	Yes	Yes	Yes
O75718	CRTAP	10	10	1	0.988172	0.944512	0.926603	0.889043	0.773513	0.595835	0.362824	0.236284	0.146248	0.100527	0.068199	0.050339	0.0394976	0.053734	0.0638548	1	1.03338	0.980771	0.957467	0.919481	0.797706	0.647648	0.433444	0.290199	0.179303	0.133598	0.100872	0.0720409	0.0566275	0.0779532	0.0791368	9.0751	-0.183538	0	0.994266	9.46555	-0.169701	0.00640736	0.99669	Yes	Yes	Yes	Yes
O75746	SLC25A12	23	22	1	0.983407	0.997318	0.96433	0.901825	0.803184	0.60915	0.38879	0.25854	0.174802	0.138871	0.113509	0.104205	0.0864657	0.0923549	0.0763497	1	0.992946	0.971834	0.934364	0.908939	0.7516	0.543299	0.369518	0.260262	0.174911	0.131256	0.10184	0.0918813	0.0801737	0.105287	0.109622	9.24164	-0.179759	0.041178	0.997994	8.95894	-0.177588	0.0447867	0.996842	Yes	Yes	Yes	Yes
O75752	B3GALNT1	1	1	1	1.03666	1.07495	0.982777	0.982418	0.998471	0.761306	0.648121	0.400128	0.278296	0.262055	0.25254	0.0993998	0.124367	0.111762	0	1	1.03555	1.10172	1.0157	1.01985	0.952902	0.774389	0.567514	0.529048	0.395234	0.31378	0.207841	0.124795	0.120523	0.110487	0.110383	10.8214	-0.149042	0.0112581	0.987249	11.1187	-0.128935	0	0.98827	Yes	Yes	Yes	Yes
O75781-2	PALM		1																	1	0.972381	1.03256	1.0072	1.02016	1.24081	0.806075	0.637656	0.529218	0.569158	0.586462	0.555857	0.499256	0.592598	0.781113	0.594635						-0.518865	0.593742	0.865312		Yes
O75781	PALM	4	4	1	1.03825	1.00109	0.968341	0.941762	0.855528	0.780689	0.725903	0.623674	0.589863	0.510185	0.506727	0.471041	0.430641	0.502189	0.558707	1	0.948251	1.09228	1.11536	1.03549	0.986162	0.897785	0.761304	0.75595	0.637269	0.489529	0.543697	0.527038	0.513814	0.623704	0.582443	16.8239	-0.0812638	0.433466	0.97462		-0.1035	0.53802	0.932585	Yes	Yes
O75787	ATP6AP2	9	6	1	1.02	0.981706	0.980787	0.911673	0.845516	0.657202	0.439218	0.304748	0.211196	0.163016	0.124568	0.10323	0.0898238	0.105033	0.120602	1	0.971184	0.967133	0.962844	0.869557	0.801943	0.649244	0.472298	0.354054	0.205553	0.149239	0.127311	0.0891166	0.0758338	0.0627578	0.0462928	9.58552	-0.175771	0.0590972	0.997328	9.62459	-0.155171	0	0.994568	Yes	Yes	Yes	Yes
O75792	RNASEH2A	17	11	1	1.0116	1.03027	1.02021	0.970062	0.922744	0.775445	0.581646	0.411908	0.252877	0.176224	0.123151	0.092856	0.0803749	0.0726386	0.0639207	1	0.973342	0.919691	0.944921	0.970992	0.880767	0.707269	0.559302	0.394573	0.2563	0.190194	0.131236	0.0802837	0.0663776	0.0439574	0.0385023	10.4791	-0.168769	0.0160465	0.998862	10.2483	-0.159232	0	0.994403	Yes	Yes	Yes	Yes
O75794	CDC123	14	13	1	0.990862	1.00008	0.995108	0.972885	0.872978	0.709803	0.4651	0.338458	0.223896	0.162252	0.123201	0.0951445	0.0763255	0.0776169	0.0809449	1	1.01423	0.997416	0.96667	0.919382	0.840306	0.677737	0.486469	0.341674	0.233414	0.166014	0.114396	0.0799622	0.0590123	0.0484408	0.0439946	9.88962	-0.175696	0.0367126	0.999396	9.83513	-0.161657	0	0.998204	Yes	Yes	Yes	Yes
O75808	CAPN15	2	1	1	0.967514	0.969996	1.01228	0.94487	0.890827	0.741934	0.4924	0.342205	0.242199	0.169805	0.133664	0.124291	0.106786	0.0769261	0.0934634	1	0.803879	1.01244	0.704768	0.873228	0.964011	0.69029	0.426395	0.346796	0.154654	0	0.050688	0	0	9.28836e-05	3.95606e-05	10.0346	-0.17637	0.0562541	0.997919	9.75677	-0.221811	0	0.937469	Yes	Yes	Yes	Yes
O75815	BCAR3	3	5	1	1.02515	1.03775	1.05486	1.00577	0.919329	0.745433	0.537868	0.388934	0.260164	0.186204	0.142709	0.126559	0.0929931	0.0851864	0.0982128	1	0.984223	1.0097	1.0048	0.991331	0.890495	0.79376	0.559785	0.378338	0.247077	0.187167	0.178988	0.102102	0.0659692	0.0803321	0.0930547	10.2864	-0.170674	0.0527612	0.997365	10.3796	-0.171543	0.0422731	0.997807	Yes	Yes	Yes	Yes
O75817	POP7	2	3	1	1.02705	1.01699	1.20417	1.13639	0.944482	0.684254	0.724944	0.587928	0.526367	0.517272	0.388741	0.426657	0.389033	0.421053	0.527899	1	0.947752	1.202	1.05887	1.06701	0.914883	0.722759	0.623421	0.46348	0.372145	0.328019	0.204051	0.264528	0.292565	0.291699	0.23914	12.856	-0.116828	0.423127	0.91731	10.7392	-0.148905	0.227617	0.964813	Yes	Yes		Yes
O75818	RPP40	11	6	1	1.02373	0.979886	1.00503	0.980447	0.930166	0.799085	0.729628	0.604795	0.575375	0.560602	0.541243	0.530189	0.437462	0.488524	0.498146	1	0.956982	1.08659	1.06457	1.074	0.985863	0.823951	0.759087	0.586196	0.587282	0.521395	0.428743	0.443818	0.454833	0.439116	0.364233	17.1462	-0.0899647	0.459565	0.989925	13.6636	-0.100709	0.380241	0.971656	Yes	Yes
O75820	ZNF189		1																	1	1.08031	1.07352	0.938472	0.854307	0.808703	0.578102	0.34738	0.344333	0.219857	0.263696	0.205219	0.205273	0.17255	0	0.133971					9.29712	-0.142894	0.0469262	0.976292		Yes		Yes
O75821	EIF3G	48	39	1	1.00494	0.957195	0.98493	0.949137	0.836351	0.678718	0.501153	0.367627	0.270229	0.215242	0.18423	0.17102	0.14204	0.148346	0.131479	1	0.505486	1.39504	0.490594	1.3106	0.464267	0.892299	0.499062	0.329681	0.251734	0.17944	0.150532	0.137114	0.122541	0.122352	0.0965707	9.95038	-0.150853	0.0833977	0.998613	9.95119	-0.139815	0.00349246	0.646118	Yes	Yes	Yes
O75822	EIF3J	16	14	1	0.991798	0.942575	0.974052	0.960366	0.841531	0.670351	0.498798	0.378564	0.284732	0.238946	0.226667	0.274961	0.242646	0.310236	0.261532	1	0.988907	0.986002	0.995147	0.989013	0.856391	0.707399	0.526716	0.384298	0.281669	0.218394	0.178818	0.191269	0.193332	0.257286	0.218985	9.79572	-0.175164	0.235308	0.990928	10.0207	-0.172212	0.175974	0.994202	Yes	Yes	Yes	Yes
O75828	CBR3	1	3	1	1.01394	0.981929	1.07507	1.06516	0.913621	0.80273	0.658882	0.487075	0.367576	0.270791	0.213597	0.189881	0.145141	0.123448	0.192653	1	1.1574	0.952396	1.03434	1.01342	0.876302	0.917333	0.782342	0.559728	0.472582	0.272003	0.174205	0.101552	0.0832211	0.0906928	0.12581	11.0716	-0.146374	0.0993837	0.99146	11.8011	-0.156799	0.0228078	0.979158	Yes	Yes	Yes	Yes
O75832	PSMD10	10	8	1	0.962634	0.938952	0.933727	0.972497	0.887168	0.73711	0.609356	0.47398	0.373071	0.331299	0.290455	0.262067	0.207339	0.119964	0.0959775	1	0.954012	0.898216	0.889642	0.94169	0.835312	0.700136	0.577333	0.43608	0.35507	0.286563	0.229108	0.213087	0.170418	0.0781969	0.0427387	11.1175	-0.110679	0	0.990944	10.5696	-0.121465	0	0.982391	Yes	Yes	Yes	Yes
O75843	AP1G2	5	7	1	0.989418	0.965665	1.00788	0.954953	0.840273	0.732126	0.496076	0.339505	0.205839	0.138286	0.121081	0.0665689	0.0642363	0.0558286	0.0904329	1	1.07597	1.04508	0.9747	1.08532	0.98645	0.859844	0.694014	0.47723	0.343283	0.258973	0.225803	0.176765	0.155686	0.158397	0.160934	9.94174	-0.173316	0.0138402	0.996666	11.1293	-0.173135	0.134271	0.992402	Yes	Yes	Yes	Yes
O75844	ZMPSTE24	28	23	1	1.00744	1.01457	0.997267	1.00858	0.96	0.847635	0.730298	0.578566	0.48501	0.416419	0.342927	0.278967	0.228893	0.143762	0.0802681	1	0.971771	0.997396	0.931803	0.992864	0.94193	0.828173	0.682258	0.574105	0.490084	0.406906	0.370957	0.320352	0.249179	0.177412	0.0846462	12.3367	-0.107072	0	0.9953	12.295	-0.0992766	0	0.989631	Yes	Yes	Yes	Yes
O75845	SC5D	1	1	1	1.02143	0.96665	0.905647	0.94191	0.909945	0.686637	0.467033	0.372085	0.198373	0.148221	0.0975008	0.074941	0.0625705	0.0641282	0.0735829	1	1.01703	0.938566	0.887659	0.87335	0.789089	0.63805	0.462179	0.332059	0.222892	0.151831	0.129615	0.0627968	0.0423739	0.0558016	0.0424463	9.90744	-0.175095	0.0147604	0.993201	9.52354	-0.15734	0	0.988991	Yes	Yes	Yes	Yes
O75864	PPP1R37	2	4	1	1.04469	1.05313	1.01016	1.0552	0.861615	0.729323	0.531619	0.406408	0.269645	0.213425	0.154235	0.172034	0.152899	0.108281	0.075267	1	0.979843	0.956355	0.962639	0.895854	0.771358	0.572081	0.418849	0.298878	0.179942	0.140401	0.0913517	0.0675233	0.0479276	0.054086	0.0585022	10.2797	-0.155022	0.0586672	0.9937	9.21646	-0.165933	0	0.996986	Yes	Yes	Yes	Yes
O75865-2	TRAPPC6A	4	3	1	1.19058	1.22774	1.19864	1.18455	1.09792	1.02217	0.867599	0.679792	0.582467	0.567964	0.502835	0.448667	0.338002	0.351865	0.299071	1	1.04348	1.15458	1.15267	1.14717	0.924497	0.768631	0.774443	0.466344	0.41132	0.367701	0.348434	0.347831	0.271434	0.223573	0.141639	14.1172	-0.103302	0.286817	0.893313	11.7328	-0.119059	0.155664	0.948762	Yes	Yes	Yes	Yes
O75874	IDH1	44	43	1	0.989679	0.982801	0.972738	0.965209	0.904534	0.759032	0.633271	0.510716	0.404854	0.35183	0.305555	0.270718	0.214076	0.151742	0.111453	1	0.989954	0.961091	0.980332	0.982398	0.898649	0.767465	0.61871	0.500761	0.393655	0.335253	0.284707	0.248711	0.208509	0.150497	0.0892648	11.4478	-0.10623	0	0.99726	11.3188	-0.110656	0	0.996942	Yes	Yes	Yes	Yes
O75879	PET112	15	11	1	0.947534	0.922231	0.932066	0.893705	0.760305	0.590711	0.367298	0.251422	0.156082	0.111197	0.0931749	0.0779784	0.0778299	0.0744257	0.085153	1	0.985306	0.924513	0.94037	0.895804	0.748186	0.537012	0.365766	0.229647	0.149206	0.103065	0.0643902	0.0549838	0.0431481	0.0520227	0.0679768	9.05802	-0.176819	0.0184253	0.992079	8.90577	-0.180808	0	0.995114	Yes	Yes	Yes	Yes
O75880	SCO1	6	8	1	0.950769	0.945101	0.934414	0.852033	0.744503	0.57838	0.371976	0.254697	0.151354	0.0961804	0.0729441	0.0561154	0.0496717	0.0438963	0.0648591	1	0.993062	0.927079	0.906763	0.89276	0.737517	0.565291	0.402706	0.25574	0.164777	0.112146	0.0636257	0.0574695	0.0461483	0.0588497	0.0654879	8.96607	-0.17487	0	0.992254	9.01992	-0.172159	0	0.992279	Yes	Yes	Yes	Yes
O75882	ATRN	11	12	1	1.00293	0.994487	0.999201	0.984201	0.946674	0.846218	0.777885	0.673649	0.653434	0.608008	0.58309	0.60719	0.532206	0.611743	0.666172	1	1.01787	0.977616	0.978034	0.98032	0.947386	0.894721	0.795598	0.704542	0.636455	0.554864	0.560032	0.533951	0.509445	0.602737	0.576593		-0.0905773	0.588734	0.975573		-0.0943027	0.535275	0.981848	Yes	Yes
O75884	RBBP9	7	7	1	1.02016	1.06741	1.04371	1.03241	1.00915	0.89306	0.768328	0.665291	0.566964	0.486051	0.361038	0.231122	0.17269	0.131272	0.0750323	1	0.977534	1.04244	1.01497	1.01069	0.979084	0.860136	0.800822	0.662675	0.589322	0.463121	0.382876	0.311624	0.214183	0.158063	0.116613	12.9029	-0.115558	0	0.988669	13.1034	-0.104261	0	0.993573	Yes	Yes	Yes	Yes
O75886	STAM2	13	12	1	0.998129	0.990304	1.00978	1.0243	0.93388	0.874515	0.839742	0.783453	0.722948	0.692298	0.629871	0.61891	0.475688	0.216532	0.0866156	1	0.988189	0.922409	0.995232	0.963452	0.975129	0.925515	0.826275	0.732875	0.674989	0.591818	0.518367	0.507254	0.392885	0.17591	0.076703	15.8107	-0.0820423	0	0.916376	14.6259	-0.0886807	0	0.955607	Yes	Yes	Yes	Yes
O75896	TUSC2	4	3	1	1.03877	0.985295	0.997158	1.06618	0.98128	0.874119	0.840567	0.731388	0.666385	0.603924	0.547188	0.517909	0.419679	0.184428	0.0434176	1	1.01307	0.953473	0.947795	0.967075	0.908698	0.878584	0.830098	0.699449	0.66522	0.640335	0.520813	0.530978	0.444979	0.317822	0.0666097	14.7303	-0.0873365	0	0.944479	14.9857	-0.0755024	0	0.93655	Yes	Yes	Yes	Yes
O75907	DGAT1	4	4	1	0.977049	1.04035	0.95428	0.88699	0.790976	0.627364	0.419577	0.340172	0.239486	0.220648	0.202088	0.161232	0.152152	0.160702	0.128891	1	1.05485	1.05502	1.0413	0.942099	0.854766	0.67497	0.451867	0.353727	0.243847	0.239163	0.178444	0.123612	0.11273	0.119377	0.0833071	9.47961	-0.148564	0.0835621	0.996144	9.85528	-0.155634	0.054048	0.994919	Yes	Yes	Yes	Yes
O75909-4	CCNK	12	11	1	0.962125	0.982205	1.01234	0.985971	0.954176	0.849619	0.727197	0.555444	0.406192	0.302217	0.219963	0.163604	0.134404	0.103196	0.0707987	1	1.04321	1.01952	1.07062	1.02133	1.00883	0.884207	0.773398	0.611026	0.479149	0.325198	0.27048	0.217984	0.168032	0.140674	0.11641	11.6592	-0.135175	0	0.998874	12.1524	-0.132839	0.0507021	0.995176	Yes	Yes	Yes	Yes
O75911	DHRS3	3	2	1	1.00767	1.01377	1.01103	0.943523	0.806094	0.654542	0.429658	0.299341	0.191726	0.123232	0.0999682	0.0676571	0.0602979	0.054389	0.0390537	1	1.05093	1.01224	0.986531	0.964415	0.900568	0.673185	0.381362	0.279296	0.194624	0.108235	0.0848558	0.0526808	0.0560597	0.0424593	0.0445741	9.53256	-0.172945	0	0.99898	9.56807	-0.20448	0.0249718	0.997479	Yes	Yes	Yes	Yes
O75915	ARL6IP5	11	7	1	0.997864	0.97651	0.991015	1.03081	0.960596	0.841853	0.697515	0.567468	0.438958	0.34395	0.278873	0.228936	0.184934	0.152709	0.122905	1	0.950754	0.920571	0.927383	0.953254	0.93104	0.771635	0.639078	0.517874	0.399113	0.297948	0.247823	0.198887	0.159853	0.122117	0.11195	11.8496	-0.119803	0.0339429	0.998414	11.2814	-0.119509	0	0.991487	Yes	Yes	Yes	Yes
O75925	PIAS1	3	7	1	1.06694	1.0983	1.00706	1.06532	0.9498	0.65084	0.477152	0.350399	0.250815	0.211333	0.191929	0.127171	0.099126	0.129444	0.162765	1	1.03573	0.9894	0.985063	0.967282	0.862937	0.680665	0.489653	0.331195	0.23125	0.177028	0.128907	0.133722	0.0890122	0.0869849	0.0823827	9.86459	-0.191132	0.121361	0.987534	9.87176	-0.167034	0.0412965	0.999037	Yes	Yes	Yes	Yes
O75928	PIAS2	10	5	1	1.00397	1.06485	1.03379	1.00087	0.913526	0.776173	0.558108	0.386976	0.259145	0.190486	0.13924	0.1083	0.0913948	0.0928026	0.101778	1	1.02959	1.003	0.932612	0.990866	0.905066	0.731478	0.577996	0.399106	0.318171	0.216157	0.145731	0.120843	0.0903752	0.0781724	0.0837522	10.3692	-0.174598	0.0546031	0.997327	10.4913	-0.147195	0.0023353	0.996778	Yes	Yes	Yes	Yes
O75934	BCAS2	17	12	1	0.996661	0.992965	0.956903	0.934622	0.877448	0.698062	0.555972	0.455079	0.350135	0.282743	0.224575	0.193821	0.142564	0.175781	0.163419	1	0.97557	0.993151	0.990055	0.927659	0.847227	0.731326	0.535619	0.456837	0.372007	0.249743	0.187334	0.193175	0.163757	0.176627	0.160428	10.564	-0.12485	0.0576229	0.997178	10.5216	-0.126745	0.0589292	0.995737	Yes	Yes	Yes	Yes
O75935	DCTN3	16	11	1	0.985643	0.959727	0.947393	0.974938	0.952015	0.844091	0.84087	0.769506	0.729446	0.725378	0.730966	0.779667	0.70731	0.84661	0.969129	1	1.0214	0.953057	0.989432	1.00294	0.951975	0.920068	0.840111	0.742984	0.689171	0.625492	0.615347	0.680965	0.650057	0.810355	0.790735		-0.0878122	0.784893	0.657183		-0.105349	0.693438	0.869798	Yes	Yes
O75937	DNAJC8	23	26	1	0.960208	0.952828	0.949408	0.993512	0.930717	0.845358	0.812586	0.722062	0.690394	0.686063	0.684358	0.782478	0.658041	0.771759	0.656374	1	0.990988	0.986674	0.967089	1.00765	0.963439	0.902732	0.817479	0.719301	0.664393	0.619628	0.598141	0.658407	0.625664	0.716395	0.544245		-0.0747506	0.69583	0.899411		-0.0889168	0.614136	0.955668	Yes	Yes
O75940	SMNDC1	15	19	1	1.02504	1.01683	1.00265	1.02035	0.962843	0.869225	0.860783	0.785454	0.759574	0.748307	0.762526	0.835606	0.74463	0.908742	1.17237	1	0.972943	0.945555	0.987446	0.958348	0.930752	0.847759	0.774819	0.702409	0.669946	0.60413	0.583884	0.622504	0.617289	0.756082	0.8377		-0.0976184	0.841782	0.394711		-0.0990412	0.668748	0.825886	Yes	Yes
O75943	RAD17	6	6	1	1.00354	0.974962	0.946128	0.914029	0.777398	0.56837	0.348455	0.267238	0.19373	0.166312	0.128161	0.130942	0.0989376	0.106629	0.118775	1	0.936399	0.953365	0.919991	0.841231	0.693774	0.491223	0.304913	0.18873	0.113102	0.079933	0.0524528	0.0490836	0.0234038	0.038551	0.0353011	9.04161	-0.182541	0.076327	0.997647	8.49029	-0.191285	0	0.99339	Yes	Yes	Yes	Yes
O75947	ATP5H	34	37	1	0.94402	0.954884	0.948796	0.959189	0.915306	0.826972	0.741753	0.646894	0.572001	0.525654	0.483365	0.481337	0.401062	0.439332	0.412982	1	1.00156	0.947876	0.946696	1.00058	0.93073	0.85071	0.78395	0.657309	0.570155	0.5065	0.436147	0.441835	0.397529	0.414997	0.294314	14.6454	-0.0772808	0.316216	0.98737	14.0386	-0.0802428	0.216341	0.988717	Yes	Yes		Yes
O75953-5	DNAJB5	1	4	1	0.890943	0.842818	0.971319	0.92228	0.756706	0.560603	0.386046	0.254116	0.186144	0.129229	0.126786	0.10802	0.0713383	0.076297	0.142895	1	0.97603	1.06775	1.02658	0.860386	0.765713	0.594772	0.41609	0.313816	0.237706	0.177831	0.147064	0.121089	0.108938	0.11652	0.0916422	9.04331	-0.179488	0.054938	0.979175	9.31652	-0.148039	0.0208286	0.995186	Yes	Yes	Yes	Yes
O75954	TSPAN9		2																	1	0.991188	1.06896	1.06006	1.09762	1.00131	0.906445	0.91364	0.86783	0.702788	0.653868	0.605704	0.656162	0.634268	0.772285	0.858508						-0.112108	0.694101	0.816119		Yes
O75955	FLOT1	10	3	1	0.958336	1.0258	0.996206	0.900436	0.861494	0.724757	0.571789	0.430221	0.30052	0.254136	0.203982	0.186645	0.16576	0.147727	0.164333	1	0.980956	0.967333	0.933495	0.913344	0.819242	0.802867	0.590939	0.443531	0.316535	0.258698	0.189616	0.19563	0.169887	0.186174	0.173203	10.4354	-0.134226	0.071624	0.995244	10.6281	-0.134497	0.0864864	0.987934	Yes	Yes	Yes	Yes
O75962	TRIO	31	25	1	0.995967	1.0049	0.995994	0.925784	0.837326	0.68645	0.462542	0.324013	0.216327	0.156007	0.120739	0.0974589	0.0813932	0.0822821	0.0784338	1	0.969249	0.982395	0.955325	0.948475	0.841718	0.702357	0.494745	0.363489	0.263162	0.206754	0.170246	0.131287	0.130609	0.129801	0.138153	9.75335	-0.16606	0.0217326	0.998689	9.96638	-0.156308	0.0736942	0.997337	Yes	Yes	Yes	Yes
O75964	ATP5L	17	13	1	0.995515	0.961872	0.972378	0.9242	0.750648	0.615017	0.397577	0.251866	0.171402	0.124092	0.0948343	0.0814022	0.0687748	0.0657462	0.0586163	1	1.0063	0.974578	0.966199	0.924341	0.826675	0.672343	0.47425	0.302803	0.224126	0.157216	0.118105	0.103047	0.0942185	0.0850865	0.0855231	9.20511	-0.171031	0.00214545	0.997599	9.70017	-0.164305	0.0256068	0.99787	Yes	Yes	Yes	Yes
O75969	AKAP3		1																	1	0.94521	0.852423	0.931688	0.982227	0.643125	0.503899	0.284933	0.261732	0.120644	0.156723	0.0694789	0	0.0729342	0.000164041	0					8.63218	-0.188567	0	0.978077		Yes		Yes
O75970	MPDZ		3																	1	0.871751	1.07985	0.928701	0.841082	0.858594	0.909995	0.727668	0.665938	0.564598	0.661682	0.619099	0.431868	0.37212	0.318231	0.238587					14.7439	-0.0658583	0	0.902425		Yes		Yes
O75976	CPD	57	41	1	0.982511	0.981496	0.972523	0.953459	0.908081	0.816388	0.764005	0.66489	0.600591	0.564354	0.54836	0.527983	0.444991	0.474543	0.410092	1	0.988395	0.994015	0.991051	0.974129	0.951359	0.845577	0.756444	0.673364	0.606319	0.518906	0.49526	0.483259	0.451103	0.445613	0.335048	16.2856	-0.0618242	0.237069	0.993959	14.9473	-0.0721473	0.249775	0.994003	Yes	Yes	Yes	Yes
O76003	GLRX3	24	27	1	0.986846	1.01411	1.00738	1.00424	0.984211	0.893417	0.827136	0.729913	0.671033	0.613519	0.498666	0.38989	0.291829	0.148884	0.0877437	1	0.988317	1.02443	0.999225	0.977759	0.970113	0.832356	0.763124	0.677285	0.587635	0.494777	0.437515	0.384441	0.301582	0.172723	0.122285	14.2197	-0.0988999	0	0.978011	13.3905	-0.0908674	0	0.986705	Yes	Yes	Yes	Yes
O76021	RSL1D1	19	23	1	0.960755	0.947412	0.925236	0.885379	0.776955	0.547019	0.306778	0.201073	0.113485	0.0736364	0.0466533	0.0419536	0.0316248	0.0320244	0.035614	1	1.02199	0.968536	0.99768	0.902969	0.749978	0.556416	0.367595	0.228418	0.13276	0.0811701	0.0534719	0.0534055	0.0399086	0.0503028	0.0629929	8.85232	-0.203671	0	0.994494	8.9564	-0.187863	0	0.997444	Yes	Yes	Yes	Yes
O76024	WFS1	15	15	1	1.08316	1.09553	1.04568	1.01427	0.970076	0.827235	0.689909	0.517272	0.426848	0.345265	0.276535	0.204615	0.172542	0.136677	0.0901986	1	1.00416	0.983722	0.967934	0.979024	0.888674	0.799086	0.590043	0.498316	0.393637	0.290315	0.263122	0.200899	0.160004	0.112265	0.0593668	11.6928	-0.120167	0.00337232	0.990033	11.1352	-0.121717	0	0.996659	Yes	Yes	Yes	Yes
O76027	ANXA9	1		1	1.13846	1.02416	0.910045	0.860863	0.813464	0.595648	0.395568	0.196554	0.155698	0.207554	0.178058	0.115913	0.125451	0.099816	0																	9.17309	-0.167909	0.0320572	0.978145					Yes		Yes
O76031	CLPX	29	32	1	0.966002	0.930635	0.912895	0.891753	0.764397	0.570609	0.357881	0.227622	0.143254	0.0973086	0.0729852	0.0613227	0.0532141	0.0530579	0.0536438	1	0.981819	0.944318	0.942945	0.885993	0.760962	0.557697	0.363226	0.23492	0.137421	0.0919757	0.0701469	0.056649	0.0452372	0.0513203	0.0447078	8.98571	-0.182279	0	0.993319	8.96131	-0.183609	0	0.996058	Yes	Yes	Yes	Yes
O76041-2	NEBL	7	8	1	1.0075	1.00669	1.01547	1.02593	0.939665	0.856431	0.796325	0.689622	0.669249	0.628939	0.580422	0.579846	0.505386	0.5821	0.506027	1	0.924469	0.953528	1.04723	0.982671	0.894122	0.830371	0.67891	0.649853	0.550503	0.464262	0.481168	0.466386	0.412949	0.496133	0.390736		-0.0681173	0.48139	0.987286	13.9822	-0.090801	0.379983	0.976011	Yes	Yes
O76054	SEC14L2	11	11	1	0.998916	1.00006	1.01549	1.00616	0.942323	0.870449	0.792537	0.676201	0.645587	0.583721	0.470894	0.391503	0.326128	0.190717	0.0956647	1	0.981252	0.94867	0.985009	1.01381	0.949603	0.822735	0.733818	0.657877	0.5327	0.442841	0.400656	0.37085	0.284011	0.145421	0.0662108	13.9208	-0.089706	0	0.978532	12.8657	-0.0971236	0	0.981135	Yes	Yes	Yes	Yes
O76062	TM7SF2	2		1	1.06851	1.00335	1.02367	0.90331	0.727339	0.631061	0.416554	0.309539	0.197972	0.162401	0.138662	0.107171	0.107283	0.129083	0.111377																	9.2894	-0.157603	0.0410075	0.99374					Yes		Yes
O76064	RNF8	3	2	1	1.12226	1.00505	1.13681	1.06225	0.925971	0.847818	0.672921	0.52714	0.385145	0.309204	0.242131	0.154541	0.160258	0.135733	0	1	0.989077	1.15873	0.965947	1.02718	0.888611	0.759581	0.775941	0.378542	0.266998	0.229691	0.192714	0.193634	0.123952	0.152746	0.109638	11.4811	-0.132617	0	0.980678	10.8299	-0.168125	0.0948068	0.972144	Yes	Yes	Yes	Yes
O76070	SNCG	7	7	1	0.973594	1.00974	0.99503	0.949684	0.961051	0.86798	0.855143	0.793984	0.751434	0.726985	0.767657	0.763067	0.672405	0.846571	1.04634	1	1.02052	0.968903	1.00846	1.00208	0.961853	0.909224	0.871097	0.709188	0.681527	0.63091	0.578012	0.578285	0.500958	0.567848	0.539352		-0.0750207	0.797621	0.552416		-0.0770658	0.507142	0.98641	Yes	Yes
O76071	CIAO1	16	11	1	0.973092	0.994046	0.967955	0.889824	0.814876	0.671462	0.495661	0.379018	0.298615	0.266778	0.245759	0.219128	0.19416	0.236926	0.242955	1	1.03519	1.08085	1.03062	0.949403	0.84972	0.777595	0.581806	0.449223	0.345652	0.282988	0.244716	0.232622	0.219641	0.24416	0.236361	9.88408	-0.143094	0.168373	0.994321	10.6319	-0.141316	0.178184	0.991364	Yes	Yes	Yes	Yes
O76074	PDE5A	3	5	1	1.06157	1.05579	1.05535	1.11645	1.00436	0.874694	0.813728	0.666272	0.57359	0.56221	0.471254	0.378093	0.343552	0.212758	0.129926	1	0.947645	1.05308	0.968354	0.927143	0.947018	0.783923	0.647021	0.599674	0.437315	0.395085	0.309109	0.333128	0.252027	0.155527	0.0758455	13.8359	-0.088955	0	0.972224	11.9603	-0.101333	0	0.984062	Yes	Yes	Yes	Yes
O76075	DFFB	5	7	1	0.990653	1.03555	1.00026	0.967583	0.934472	0.875435	0.78508	0.71861	0.596543	0.566376	0.520945	0.422449	0.334578	0.220483	0.13973	1	1.0047	1.01797	1.04421	0.982827	0.980461	0.916636	0.809432	0.738038	0.638518	0.527127	0.471927	0.460619	0.353276	0.183432	0.068087	14.0982	-0.0835605	0	0.980864	14.128	-0.0924552	0	0.975031	Yes	Yes	Yes	Yes
O76080	ZFAND5	5	5	1	0.971836	0.950677	0.993248	0.931561	0.898125	0.848385	0.79329	0.696732	0.669048	0.693122	0.691844	0.690778	0.588376	0.733025	0.973544	1	0.969369	1.05214	1.00028	0.886519	0.900841	0.855213	0.778959	0.728513	0.686689	0.656833	0.657966	0.67071	0.656743	0.874978	0.843579		-0.0792265	0.715991	0.66512		-0.0669583	0.716135	0.753656	Yes	Yes
O76081	RGS20		1																	1	1.02001	1.00899	1.032	0.847342	1.02883	0.83096	0.582933	0.315077	0.436656	0.312555	0.268361	0.247342	0.201964	0.245636	0.19836					10.5101	-0.197835	0.233456	0.970357		Yes		Yes
O76094	SRP72	37	32	1	0.956769	0.914682	0.942409	0.888451	0.736251	0.512766	0.284766	0.178702	0.106055	0.0704725	0.0519628	0.0416172	0.0364306	0.0390456	0.0399141	1	0.991328	0.974604	0.965201	0.914377	0.774168	0.508855	0.290964	0.182808	0.103896	0.0662896	0.0430598	0.0257502	0.0210033	0.0229196	0.0282528	8.65866	-0.204384	0	0.994074	8.76256	-0.216493	0	0.998828	Yes	Yes	Yes	Yes
O76095	JTB	1	2	1	0.892067	1.01258	0.931407	0.929223	0.896066	0.845355	0.658589	0.657137	0.572036	0.470438	0.585467	0.576612	0.506762	0.68415	0.844103	1	1.04602	0.977031	1.07923	0.940159	0.904115	0.903212	0.802569	0.67262	0.572003	0.620135	0.505853	0.500572	0.537276	0.657214	0.709202		-0.132577	0.605565	0.755796		-0.119108	0.578092	0.900708	Yes	Yes
O77932	DXO	3	4	1	1.03484	1.09029	1.02446	0.978741	1.0709	0.89967	0.830135	0.714475	0.707512	0.636055	0.665765	0.588729	0.518351	0.568263	0.491133	1	0.979566	0.964505	1.03505	0.965427	0.934393	0.797997	0.721786	0.669081	0.576737	0.465116	0.445715	0.500957	0.441395	0.487859	0.341983		-0.0657024	0.476948	0.955112	14.3292	-0.0814934	0.331615	0.978247	Yes	Yes
O94760	DDAH1	26	19	1	1.05684	1.01659	1.01768	1.04307	0.969498	0.901415	0.869389	0.75662	0.684702	0.613891	0.541022	0.498791	0.399273	0.324956	0.179176	1	0.966957	0.995774	1.03204	1.01495	0.933874	0.851231	0.754038	0.685525	0.56992	0.483835	0.440087	0.413674	0.381706	0.297175	0.131557	15.2496	-0.0770048	0	0.984013	13.6984	-0.0809844	0	0.984936	Yes	Yes	Yes	Yes
O94761	RECQL4	13	13	1	0.997148	1.01911	0.979657	0.913961	0.758054	0.593267	0.375102	0.273463	0.186385	0.145758	0.126259	0.105866	0.0966573	0.100866	0.110446	1	0.959929	0.95517	0.9382	0.862547	0.733308	0.536078	0.340624	0.219992	0.151599	0.112244	0.0732548	0.0562072	0.053499	0.0540478	0.0565983	9.12388	-0.17474	0.0536043	0.998394	8.79335	-0.177784	0	0.995798	Yes	Yes	Yes	Yes
O94762	RECQL5	4	8	1	1.01503	0.952683	0.982274	0.930416	0.807238	0.610268	0.384254	0.262436	0.202454	0.171286	0.145192	0.130225	0.12593	0.136879	0.158545	1	0.960824	1.03142	0.998551	0.900428	0.804875	0.56646	0.390389	0.288206	0.16963	0.155245	0.140222	0.0964119	0.0922864	0.101896	0.119779	9.22367	-0.194198	0.11048	0.997141	9.17105	-0.179177	0.0624047	0.996682	Yes	Yes	Yes	Yes
O94763-4	URI1	1	1	1	0.938154	1.09758	0.959368	1.14483	0.959369	0.919654	0.635221	0.517899	0.468317	0.409145	0.240322	0.279077	0.177255	0.33109	0.337865	1	0.887923	0.938585	0.833517	1.04871	0.909599	0.664637	0.563496	0.553367	0.481857	0.4261	0.265274	0.308615	0.278585	0.241308	0.287915	11.4244	-0.157014	0.264226	0.957461	11.3528	-0.106275	0.176724	0.941939	Yes	Yes	Yes	Yes
O94763	URI1	10	12	1	0.991345	1.01593	1.03184	1.0474	0.961492	0.88225	0.771775	0.664787	0.556224	0.490981	0.430743	0.377526	0.266169	0.214267	0.183752	1	1.04069	1.07306	1.09185	1.01809	0.962563	0.880938	0.771687	0.645906	0.506075	0.425729	0.335592	0.29693	0.23604	0.196347	0.15527	13.4044	-0.0901892	0	0.99328	12.7165	-0.10577	0.0346578	0.990912	Yes	Yes	Yes	Yes
O94766	B3GAT3	6	5	1	0.992871	1.01693	1.02076	0.934075	0.874156	0.718416	0.553247	0.423422	0.308406	0.240986	0.172568	0.143984	0.13188	0.117417	0.122783	1	1.01203	0.977664	1.01114	0.943825	0.801277	0.662185	0.510869	0.374944	0.279582	0.20645	0.152437	0.124243	0.0878523	0.0807963	0.0709137	10.4051	-0.138539	0.0324783	0.99835	9.94977	-0.142145	0	0.998611	Yes	Yes	Yes	Yes
O94768	STK17B	3	4	1	1.00598	1.04486	1.00791	0.918781	0.835623	0.665451	0.423591	0.276247	0.158445	0.113886	0.0916553	0.0635968	0.0561375	0.0397737	0.0425333	1	1.02545	1.06362	1.00217	0.939668	0.882408	0.636883	0.439854	0.296523	0.201344	0.167115	0.100002	0.113839	0.090443	0.0628284	0.0260764	9.52554	-0.18357	0	0.997709	9.63672	-0.175482	0.0219242	0.996724	Yes	Yes	Yes	Yes
O94776	MTA2	45	36	1	0.980489	0.969107	0.974961	0.930982	0.854986	0.748848	0.620629	0.492099	0.378009	0.29423	0.222929	0.161258	0.126959	0.08954	0.0713965	1	1.01865	1.01492	0.994312	0.969115	0.885596	0.778539	0.644732	0.513387	0.41284	0.335177	0.265008	0.195021	0.138726	0.0870593	0.0653525	10.9269	-0.125174	0	0.995473	11.3069	-0.120986	0	0.99608	Yes	Yes	Yes	Yes
O94782	USP1	5	6	1	1.1465	1.04274	1.00371	0.986954	0.920465	0.784335	0.63756	0.522321	0.408574	0.373524	0.311345	0.287744	0.289427	0.272634	0.279818	1	0.942894	1.03011	0.945114	0.925834	0.862354	0.685165	0.536294	0.418342	0.283496	0.214579	0.171456	0.162147	0.150141	0.149647	0.135613	11.3282	-0.127181	0.23154	0.985145	10.1835	-0.141646	0.0614795	0.994463	Yes	Yes	Yes	Yes
O94788	ALDH1A2		10																	1	1.01575	1.01028	0.987518	0.983638	0.910986	0.833524	0.793598	0.652011	0.600819	0.511919	0.461728	0.466972	0.442837	0.477226	0.473263					15.0737	-0.0871394	0.40219	0.989335		Yes
O94804	STK10	28	23	1	1.00711	1.00905	1.02316	0.996457	0.945417	0.856868	0.790063	0.676627	0.620945	0.566647	0.467781	0.335238	0.249341	0.0997876	0.0511457	1	1.00266	1.03408	1.03625	1.00401	0.954699	0.86632	0.751544	0.643859	0.581342	0.467273	0.414896	0.339634	0.243522	0.0919965	0.0591869	13.5091	-0.102435	0	0.971546	12.9868	-0.103858	0	0.981251	Yes	Yes	Yes	Yes
O94808	GFPT2	7	10	1	1.04477	0.997879	1.02343	0.930761	0.794035	0.627303	0.395528	0.258901	0.171277	0.134037	0.0996855	0.0817593	0.0781191	0.07624	0.0674843	1	1.01625	1.03825	1.05739	0.922302	0.823319	0.646422	0.436411	0.313498	0.218161	0.170069	0.154482	0.10411	0.0875069	0.103672	0.0905312	9.30641	-0.182484	0.0290156	0.997908	9.57995	-0.165962	0.0441371	0.996678	Yes	Yes	Yes	Yes
O94811	TPPP	4	3	1	1.00744	1.00323	1.03182	0.976109	0.980936	0.869766	0.836816	0.686909	0.69775	0.63485	0.61014	0.592258	0.534699	0.509528	0.35834	1	1.1381	1.1664	0.986322	1.10463	1.09764	0.919898	0.809611	0.759872	0.755172	0.690141	0.624785	0.668784	0.603912	0.655417	0.527002	17.9159	-0.0509467	0	0.97587		-0.0656531	0.577024	0.873678	Yes	Yes	Yes
O94817	ATG12	6	3	1	1.00738	0.992409	1.01478	1.01298	0.940997	0.801636	0.633238	0.470614	0.303594	0.196394	0.134383	0.119331	0.0929017	0.07302	0.0662306	1	1.05953	1.05693	1.01641	0.991135	0.937947	0.838725	0.673614	0.473268	0.305076	0.212516	0.129346	0.0836803	0.0561658	0.0434156	0.0513066	10.8505	-0.160148	0.0119989	0.998899	11.0007	-0.168869	0	0.996635	Yes	Yes	Yes	Yes
O94819	KBTBD11	2	1	1	0.929623	0.873846	0.96447	0.911488	0.853186	0.785814	0.617165	0.471028	0.309539	0.217401	0.131457	0.141022	0.0686725	0.0757739	0.0766989	1	1.11998	1.07576	1.02254	0.88461	0.929461	0.846883	0.738697	0.448781	0.475571	0.262041	0.279073	0.234632	0.189052	0.223224	0.195619	10.7099	-0.145564	0	0.982898	11.4388	-0.139063	0.148995	0.973641	Yes	Yes	Yes	Yes
O94826	TOMM70A	53	52	1	0.977235	0.97547	0.963156	0.967334	0.918242	0.772986	0.638598	0.488372	0.333217	0.205129	0.121937	0.0751062	0.0600901	0.0400393	0.0268972	1	0.972551	0.974469	0.968658	0.951344	0.904633	0.783297	0.633464	0.48381	0.353184	0.238375	0.151105	0.0900849	0.0587952	0.041401	0.0315125	10.8491	-0.160325	0	0.995076	10.9009	-0.152468	0	0.994865	Yes	Yes	Yes	Yes
O94827-6	PLEKHG5		2																	1	0.983708	0.931192	0.972946	0.898879	0.794309	0.541698	0.35964	0.263284	0.192066	0.129539	0.09761	0.0868571	0.082656	0.0833305	0.077253					9.04528	-0.179133	0.0343622	0.996455		Yes		Yes
O94829	IPO13	6	1	1	1.05439	1.02424	1.06983	1.00658	0.943904	0.778674	0.545767	0.405217	0.263313	0.207439	0.184388	0.143782	0.108222	0.116359	0.121042	1	1.23851	1.33209	1.16586	1.15119	1.03077	0.824891	0.651083	0.496015	0.320908	0.184703	0.151578	0.0795549	0.161928	0.0998174	0.178726	10.3975	-0.176291	0.0908088	0.995675	10.9314	-0.187438	0.0982601	0.927838	Yes	Yes	Yes	Yes
O94830	DDHD2	12	12	1	1.06439	1.04848	1.04342	1.01658	0.971843	0.777482	0.575266	0.410738	0.293539	0.229005	0.195581	0.16704	0.145976	0.141479	0.127018	1	1.06316	1.05233	1.01885	0.976208	0.907585	0.776035	0.619893	0.47344	0.309224	0.243451	0.218642	0.168436	0.164503	0.136353	0.134265	10.5233	-0.173533	0.114731	0.995542	10.8039	-0.144894	0.0783288	0.995636	Yes	Yes	Yes	Yes
O94832	MYO1D	16	21	1	1.039	0.99304	0.967954	0.911018	0.81688	0.612725	0.366413	0.236662	0.141109	0.0925546	0.0718283	0.0573996	0.0536945	0.0496801	0.0402371	1	1.07171	0.994147	0.933674	0.947103	0.80602	0.584984	0.382207	0.233012	0.148534	0.094121	0.0765026	0.0599104	0.0446698	0.0471367	0.0521289	9.21558	-0.194674	0.0066334	0.997734	9.1821	-0.192892	0.00816784	0.996221	Yes	Yes	Yes	Yes
O94842	TOX4	13	10	1	0.968187	0.908808	0.939644	0.933679	0.78743	0.657915	0.512294	0.426222	0.356203	0.296297	0.257183	0.261944	0.219935	0.247402	0.241872	1	0.974948	1.02223	1.03289	0.899239	0.834469	0.65517	0.513269	0.426234	0.315697	0.254489	0.220101	0.184285	0.166403	0.180727	0.167588	10.1375	-0.125134	0.162081	0.990352	10.1264	-0.13035	0.0802952	0.99635	Yes	Yes	Yes	Yes
O94851	MICAL2		4																	1	0.89709	0.938213	0.930566	0.879957	0.706039	0.644545	0.434181	0.307219	0.23162	0.168264	0.158342	0.112683	0.0914603	0.0916373	0.0990252					9.31698	-0.142679	0	0.986794		Yes		Yes
O94854	KIAA0754	4	3	1	1.03971	1.07587	0.992943	1.01066	0.916605	0.759743	0.60931	0.483672	0.362132	0.293405	0.250443	0.215637	0.184158	0.173027	0.162195	1	1.04001	1.09449	1.04016	1.02629	0.922141	0.867982	0.639265	0.513274	0.391347	0.363986	0.255441	0.270466	0.242426	0.21768	0.167424	10.9504	-0.133059	0.105064	0.995521	11.395	-0.134388	0.159905	0.989769	Yes	Yes	Yes	Yes
O94855-2	SEC24D	23	16	1	1.01137	1.01831	1.01419	1.03279	0.974314	0.890262	0.770457	0.633534	0.461825	0.311887	0.192244	0.113681	0.100445	0.0699405	0.0612385	1	0.965571	1.04026	0.998096	0.967294	0.952758	0.873778	0.738668	0.601574	0.465313	0.346864	0.2405	0.129779	0.0966366	0.094089	0.0872155	12.0125	-0.152032	0	0.997231	11.9537	-0.136394	0	0.995204	Yes	Yes	Yes	Yes
O94864	SUPT7L	2	5	1	1.13401	1.13888	1.04603	1.03055	0.944674	0.801956	0.609534	0.479565	0.467208	0.396522	0.389024	0.349601	0.278888	0.245275	0.219292	1	0.950162	0.92816	0.946494	0.920954	0.832496	0.74762	0.625803	0.595641	0.549898	0.49139	0.478153	0.47106	0.439433	0.420302	0.299366	11.5731	-0.116776	0.213502	0.969051	13.9838	-0.0643371	0	0.981213	Yes	Yes	Yes	Yes
O94868	FCHSD2	1		1	0.982665	1.07539	1.14679	0.919029	0.854712	0.811402	0.701575	0.521146	0.454635	0.30091	0.151424	0.100579	0.13517	0.0888471	0.154457																	11.3701	-0.130669	0	0.97323					Yes		Yes
O94874	UFL1	37	34	1	0.972783	0.949424	0.947814	0.888041	0.752977	0.581322	0.356986	0.226497	0.138742	0.0933743	0.0730587	0.0648092	0.0563841	0.0579972	0.0615264	1	1.00727	0.928947	0.948949	0.89599	0.745073	0.573577	0.374793	0.24321	0.144636	0.108053	0.075069	0.0708076	0.0570105	0.0686449	0.0661376	8.98222	-0.181627	0	0.995476	9.00483	-0.175448	0	0.995255	Yes	Yes	Yes	Yes
O94876	TMCC1		2																	1	0.932123	1.06182	1.08662	1.19711	0.92256	1.1276	0.891599	0.845638	0.791443	0.61332	0.587848	0.612145	0.602444	0.90814	1.17006						-0.116182	0.75667	0.431057		Yes
O94885	SASH1	2	3	1	1.02343	0.967718	0.988623	0.964881	0.915622	0.756933	0.733783	0.558106	0.483464	0.35326	0.333733	0.256046	0.226331	0.239159	0.197116	1	0.987274	1.22238	1.18875	0.999819	0.9401	0.872733	0.891553	0.611416	0.487777	0.38297	0.326939	0.272646	0.257705	0.195406	0.143698	11.9954	-0.10114	0.0490613	0.993705	12.5583	-0.124327	0.109277	0.952477	Yes	Yes	Yes	Yes
O94886	TMEM63A	2	1	1	1.02107	1.00045	0.993086	0.994473	0.885152	0.813169	0.678201	0.589859	0.528045	0.445663	0.329075	0.35384	0.347104	0.329433	0.324949	1	0.927937	0.961	0.956274	0.900402	0.934566	0.737191	0.668737	0.527763	0.428321	0.394476	0.325758	0.270849	0.251942	0.25763	0.170284	12.4301	-0.0981676	0.234149	0.993739	11.7562	-0.0960086	0.0217536	0.987578	Yes	Yes	Yes	Yes
O94887	FARP2	4	7	1	0.957127	0.975776	0.93554	0.840198	0.689654	0.599937	0.445796	0.334184	0.301171	0.260995	0.285075	0.30832	0.224748	0.295006	0.297861	1	0.996776	1.01827	0.992479	0.951922	0.732188	0.655575	0.432602	0.310362	0.2244	0.146246	0.158241	0.125584	0.134893	0.125182	0.133205	9.17137	-0.139995	0.219355	0.986741	9.41503	-0.161749	0.0677914	0.994891	Yes	Yes	Yes	Yes
O94888	UBXN7	32	18	1	1.0175	0.998188	0.996265	0.993293	0.936397	0.845078	0.781874	0.68461	0.641609	0.638021	0.590803	0.586237	0.490896	0.485901	0.30857	1	1.00188	1.01485	1.02186	1.01512	0.988537	0.855156	0.792777	0.719175	0.639213	0.551046	0.53019	0.536036	0.529294	0.473688	0.220736	16.9467	-0.053909	0	0.974081	15.8817	-0.0608775	0	0.959332	Yes	Yes	Yes	Yes
O94889	KLHL18	5	4	1	1.08909	1.0936	1.06163	1.01832	1.00967	0.927558	0.730746	0.566639	0.452528	0.357277	0.222642	0.125087	0.112258	0.0646235	0.0869298	1	1.06032	0.999934	0.944391	1.02126	0.936724	0.808501	0.636975	0.528167	0.38927	0.300107	0.207855	0.110166	0.0521448	0.0153895	0.00693165	11.9269	-0.142581	0	0.987896	11.2256	-0.147397	0	0.989344	Yes	Yes	Yes	Yes
O94898	LRIG2	3	1	1	1.11788	1.30862	1.19977	1.16647	1.2119	1.02466	0.805133	0.612321	0.504869	0.371232	0.281203	0.22264	0.135787	0.148387	0.115721	1	0.837234	1.09997	0.921485	1.09192	0.968073	0.556079	0.60653	0.334442	0.351997	0.211041	0.295024	0.175648	0.206148	0.229701	0.252613	12.3856	-0.152581	0.09267	0.920535	9.95709	-0.178729	0.210299	0.944147	Yes	Yes	Yes	Yes
O94901-9	SUN1	4	4	1	0.943525	0.992447	0.969758	0.894	0.744527	0.637805	0.457894	0.331612	0.234572	0.210298	0.173688	0.137782	0.103203	0.135493	0.108271	1	1.05094	1.08327	1.16578	0.934311	0.814621	0.703541	0.553221	0.335626	0.265428	0.219171	0.169699	0.147813	0.101085	0.104008	0.131029	9.52582	-0.138485	0.0143916	0.995846	10.0583	-0.149989	0.0477521	0.981047	Yes	Yes	Yes	Yes
O94903	PROSC	23	19	1	0.994975	0.991723	1.00645	0.972782	0.911047	0.85146	0.671825	0.492694	0.335567	0.231346	0.162721	0.11764	0.0939592	0.0870332	0.0733403	1	0.998154	0.986963	0.989192	0.963047	0.909482	0.798278	0.638958	0.489855	0.341946	0.244605	0.169636	0.110768	0.0850972	0.059435	0.0393541	11.1194	-0.153155	0.00857931	0.99871	10.9732	-0.148195	0	0.998166	Yes	Yes	Yes	Yes
O94905	ERLIN2	17	17	1	0.950131	0.916529	0.913236	0.858353	0.717416	0.52501	0.303048	0.206543	0.140147	0.105941	0.0907449	0.0734554	0.0618719	0.0609763	0.0654833	1	1.01008	0.931975	0.925031	0.868114	0.73934	0.526716	0.33144	0.214196	0.139028	0.0954275	0.0729298	0.0690473	0.053168	0.0609778	0.0681684	8.6519	-0.178607	0.00374926	0.991542	8.76285	-0.180846	0.00129492	0.994522	Yes	Yes	Yes	Yes
O94906	PRPF6	29	22	1	0.965818	0.953563	0.929096	0.849653	0.697226	0.521506	0.293325	0.194507	0.125502	0.101351	0.0860149	0.0860653	0.076577	0.086528	0.0972822	1	0.981921	0.929203	0.934286	0.86454	0.707568	0.494075	0.292134	0.199731	0.128801	0.103242	0.08082	0.0777143	0.0756546	0.0894201	0.0996154	8.54393	-0.187528	0.0311839	0.993304	8.53229	-0.194465	0.0393334	0.994065	Yes	Yes	Yes	Yes
O94910	LPHN1	1	2	1	1.0067	1.16778	0.944635	1.04164	0.933796	0.818275	0.591343	0.484143	0.274332	0.24288	0.197302	0	0	0.258126	0.000159925	1	0.90823	0.868297	0.946002	0.897241	0.826483	0.635468	0.467326	0.308469	0.288213	0.227026	0.162579	0.140416	0.114982	0.118526	0.0735436	10.8189	-0.157865	0.00470004	0.963317	9.73411	-0.138567	0.00543726	0.983181	Yes	Yes	Yes	Yes
O94913	PCF11	17	11	1	1.0488	1.00787	1.00211	0.957754	0.854001	0.686338	0.517644	0.362432	0.275451	0.248609	0.226106	0.242086	0.211949	0.200145	0.265033	1	1.0591	1.03051	1.02555	1.01449	0.897515	0.69298	0.544643	0.365007	0.26988	0.2269	0.189652	0.172639	0.145908	0.172132	0.153811	9.91303	-0.170712	0.19779	0.995236	10.1121	-0.169504	0.126399	0.996183	Yes	Yes	Yes	Yes
O94915-2	FRYL	1		1	0.931121	1.07624	0.997276	0.961059	0.640761	0.614599	0.339945	0.224286	0.107454	0.113937	0.0657919	0.0551723	0	0.0826843	5.37592e-05																	8.8691	-0.187433	0	0.985223					Yes		Yes
O94915	FRYL	34	32	1	0.974372	0.934584	0.924569	0.847701	0.728119	0.523273	0.310665	0.208823	0.146278	0.12529	0.111571	0.103137	0.0910962	0.0974322	0.0860062	1	1.01006	1.00056	0.946237	0.878835	0.720665	0.539525	0.341874	0.229374	0.155824	0.123468	0.104424	0.0927462	0.073382	0.0841891	0.0728612	8.65487	-0.18143	0.0404125	0.993057	8.79905	-0.174822	0.0205283	0.998144	Yes	Yes	Yes	Yes
O94916-5	NFAT5	6	6	1	1.02912	1.03235	1.01304	0.973172	0.827775	0.735514	0.554949	0.429838	0.30066	0.228684	0.168403	0.119228	0.12324	0.0958797	0.0894862	1	0.985406	0.95047	0.962133	0.91844	0.837923	0.704412	0.538306	0.404309	0.265389	0.218087	0.147639	0.101375	0.070123	0.0984093	0.0833457	10.4112	-0.137354	0	0.997334	10.1667	-0.143942	0	0.995466	Yes	Yes	Yes	Yes
O94919	ENDOD1	15	14	1	1.04561	1.00793	1.06111	1.04037	0.930653	0.840755	0.685546	0.588262	0.47157	0.433523	0.363539	0.335219	0.293966	0.351233	0.275985	1	1.06471	1.07778	1.07785	1.03826	0.948279	0.81369	0.691365	0.578795	0.448034	0.350735	0.311367	0.287953	0.251436	0.267074	0.23055	12.1778	-0.112765	0.250327	0.991277	11.7917	-0.122305	0.184627	0.98813	Yes	Yes	Yes	Yes
O94923	GLCE	5	9	1	1.0576	1.01405	1.05257	0.967386	0.943097	0.838009	0.588975	0.438753	0.251805	0.162264	0.101937	0.0716272	0.0441911	0.0412351	0.0123091	1	1.00126	0.973709	0.968855	0.916984	0.831856	0.689553	0.554332	0.402531	0.258882	0.167359	0.133684	0.0870991	0.0721517	0.0510767	0.0616185	10.6497	-0.182723	0	0.99663	10.1054	-0.152241	0	0.995398	Yes	Yes	Yes	Yes
O94925-3	GLS	2	2	1	0.960404	1.00056	0.946758	0.968152	0.800163	0.642545	0.400173	0.261033	0.146121	0.103596	0.0681979	0.0309632	0.0199611	0.0296465	0.0435066	1	0.947984	0.867554	0.851405	0.838141	0.769361	0.594244	0.360392	0.260528	0.156719	0.095565	0.0595262	0.0537189	0.0264674	0.0310774	0.03139	9.36961	-0.193686	0	0.996789	9.01627	-0.179327	0	0.976114	Yes	Yes	Yes	Yes
O94925	GLS	26	17	1	1.00432	0.976881	0.990467	0.968992	0.818832	0.651134	0.424027	0.298049	0.191489	0.126961	0.102119	0.0805461	0.064189	0.0643739	0.0490175	1	1.02791	0.965311	1.032	0.914439	0.806977	0.620303	0.458434	0.296002	0.184317	0.126486	0.0900329	0.0647614	0.0489496	0.0410842	0.0392591	9.54141	-0.175893	0.010018	0.999254	9.48148	-0.172585	0	0.997058	Yes	Yes	Yes	Yes
O94927	HAUS5	20	19	1	1.00349	1.03603	1.02259	0.952337	0.890593	0.72747	0.572984	0.432544	0.330842	0.306922	0.285518	0.267207	0.232964	0.186404	0.060516	1	0.982201	1.01869	1.01709	0.973184	0.903148	0.704225	0.539968	0.409483	0.325911	0.256805	0.243241	0.246528	0.229258	0.186265	0.093085	10.7874	-0.119257	0.058095	0.990734	10.3997	-0.141749	0.123801	0.994728	Yes	Yes	Yes	Yes
O94941	UBOX5	3	3	1	1.00478	0.984352	1.0453	0.971948	0.953186	0.861643	0.722888	0.652348	0.521195	0.451106	0.346196	0.30848	0.233682	0.166118	0.0922165	1	0.978831	0.936998	0.961756	0.945119	0.876713	0.824857	0.657114	0.549626	0.449132	0.425527	0.312451	0.271294	0.200377	0.115807	0.0430811	12.6921	-0.10261	0	0.993683	11.8147	-0.107999	0	0.984525	Yes	Yes	Yes	Yes
O94952	FBXO21	13	8	1	0.992867	0.917432	0.922443	0.877674	0.755553	0.597547	0.384617	0.254577	0.177789	0.123668	0.0859431	0.0652847	0.0652068	0.0540374	0.0465113	1	1.01991	0.956424	0.959511	0.918561	0.775085	0.639658	0.433428	0.281926	0.178041	0.13349	0.0911706	0.0635862	0.0385	0.0413889	0.0342453	9.1027	-0.169889	0	0.993	9.39897	-0.17295	0	0.996491	Yes	Yes	Yes	Yes
O94953	KDM4B	3	5	1	1.02845	1.12592	1.11864	1.10443	0.98284	0.850374	0.691508	0.520585	0.398406	0.361615	0.347455	0.328839	0.21755	0.235576	0.19548	1	0.937003	0.950315	0.929075	0.884178	0.766182	0.602154	0.434138	0.303736	0.236291	0.156908	0.126542	0.102313	0.0721495	0.0921325	0.0938888	11.5898	-0.137057	0.202336	0.973737	9.34191	-0.149383	0	0.993579	Yes	Yes	Yes	Yes
O94955	RHOBTB3	5	3	1	0.986496	0.988937	0.989717	0.94776	0.763007	0.669993	0.42693	0.290012	0.184659	0.147451	0.113811	0.118921	0.094815	0.100728	0.119067	1	0.976217	0.938193	0.960565	0.872239	0.747803	0.541859	0.420563	0.25068	0.171591	0.138252	0.0749808	0.0582613	0.0591549	0.0354072	0.067395	9.43853	-0.17368	0.0524273	0.995575	9.01764	-0.168816	0	0.994768	Yes	Yes	Yes	Yes
O94964-2	SOGA1	8	8	1	1.00076	0.946541	0.910836	0.88211	0.754718	0.579959	0.36091	0.268034	0.223913	0.200492	0.212599	0.214408	0.198164	0.219261	0.247407	1	0.969177	0.956464	0.977373	0.89867	0.743617	0.547726	0.392612	0.280742	0.204019	0.152421	0.132953	0.132435	0.117218	0.129761	0.129286	8.93074	-0.188053	0.184776	0.987712	9.01462	-0.16898	0.0720429	0.997397	Yes	Yes	Yes	Yes
O94966-5	USP19		38																	1	0.974859	0.997617	0.97553	0.975095	0.912047	0.767929	0.61467	0.44181	0.332668	0.239487	0.174617	0.133219	0.0990436	0.0822132	0.0784892					10.7818	-0.14194	0	0.999112		Yes		Yes
O94966-6	USP19	35		1	0.977563	0.988997	1.01733	0.965185	0.880407	0.768503	0.589849	0.436401	0.311006	0.22339	0.162092	0.117954	0.0957799	0.076628	0.0615212																	10.6266	-0.145651	0	0.998927					Yes		Yes
O94967	WDR47	6	9	1	1.0567	1.09657	1.08562	1.10962	0.970416	0.918085	0.8184	0.652508	0.537998	0.379571	0.215196	0.147099	0.11971	0.0805163	0.0498394	1	1.00909	0.978761	0.978233	0.897935	0.877756	0.808193	0.700175	0.55747	0.461872	0.336487	0.207615	0.13507	0.0988263	0.0878642	0.0747646	12.4458	-0.146564	0	0.985004	11.5508	-0.129486	0	0.987599	Yes	Yes	Yes	Yes
O94972	TRIM37	2	4	1	1.06822	1.06096	1.13088	1.04826	0.915734	0.789003	0.539225	0.44862	0.366715	0.318006	0.23644	0.230531	0.190893	0.277045	0.294289	1	1.11146	0.98189	1.03422	0.893126	0.8001	0.739604	0.575469	0.441213	0.39027	0.3244	0.362443	0.34757	0.272643	0.390047	0.3673	10.5281	-0.168392	0.231552	0.979002	10.6539	-0.126697	0.295886	0.97267	Yes	Yes	Yes	Yes
O94973-2	AP2A2	31		1	1.01139	1.01808	1.02652	1.02112	0.956753	0.835755	0.673349	0.531628	0.373748	0.245065	0.158071	0.0994864	0.0909977	0.0608215	0.0361851																	11.2735	-0.154509	0	0.997817					Yes		Yes
O94973	AP2A2		20																	1	1.02751	1.00169	1.05395	1.00833	0.923398	0.792293	0.633362	0.502353	0.357523	0.227422	0.152835	0.0869219	0.0672006	0.0453491	0.0416002					10.9815	-0.154141	0	0.995576		Yes		Yes
O94979-8	SEC31A	46	53	1	0.997337	0.974754	0.99659	1.00043	0.930757	0.797807	0.606443	0.44483	0.284369	0.195777	0.138772	0.09915	0.0838296	0.0712125	0.0622445	1	1.00513	0.990162	0.97852	0.969423	0.898828	0.786578	0.621677	0.45567	0.318244	0.215549	0.159865	0.0957267	0.0682102	0.0572942	0.0457087	10.7049	-0.161998	0.0091244	0.999324	10.7725	-0.153515	0	0.998353	Yes	Yes	Yes	Yes
O94985	CLSTN1	5	3	1	1.0438	1.10535	1.02857	0.996137	0.953948	0.870503	0.729989	0.629047	0.44338	0.39056	0.315397	0.262975	0.210335	0.134548	0.0950413	1	0.968121	0.969223	1.04053	0.895165	0.772001	0.657328	0.549808	0.427248	0.319484	0.260633	0.194624	0.148394	0.121543	0.0786912	0.052405	12.2813	-0.11242	0	0.9908	10.1292	-0.128228	0	0.992405	Yes	Yes	Yes	Yes
O94986	CEP152	2	2	1	1.00226	1.20343	1.08667	0.957436	0.856049	0.744011	0.700493	0.564152	0.437356	0.390155	0.369929	0.369493	0.397463	0.453479	0.540985	1	1.1268	0.962314	0.985387	1.03247	0.9598	0.896519	0.944228	0.687683	0.59841	0.561813	0.533613	0.483692	0.357258	0.577192	0.673228	11.9594	-0.122549	0.396599	0.926639		-0.176812	0.527675	0.898109	Yes	Yes
O94992	HEXIM1	19	12	1	1.00911	1.04422	1.0283	1.01781	0.973094	0.905919	0.849082	0.752173	0.726546	0.722054	0.716224	0.760567	0.671698	0.859359	1.00444	1	0.999903	0.979836	0.994732	0.952621	0.953346	0.896496	0.823105	0.713637	0.64613	0.621843	0.621712	0.644243	0.633065	0.741635	0.798331		-0.0965917	0.778146	0.688889		-0.107806	0.670918	0.896793	Yes	Yes
O95049-2	TJP3		7																	1	1.0046	1.01725	0.991868	0.928205	0.830148	0.71696	0.534547	0.425893	0.327598	0.253771	0.180774	0.139102	0.134992	0.0674896	0.0692865					10.3561	-0.132752	0	0.997596		Yes		Yes
O95049-4	TJP3	11		1	0.978891	0.987576	0.962456	0.908698	0.858425	0.754552	0.583485	0.46124	0.350262	0.261552	0.214851	0.170582	0.182669	0.121297	0.164598																	10.7084	-0.124171	0.0325617	0.995011					Yes		Yes
O95057	DIRAS1	7	3	1	0.99022	1.01855	1.00088	0.915753	0.829012	0.659798	0.434208	0.306239	0.222419	0.148864	0.12803	0.0985421	0.0876553	0.076858	0.0646987	1	1.0681	1.09553	1.04273	0.985435	0.912756	0.695731	0.498057	0.334824	0.233539	0.162397	0.130388	0.0863788	0.0604611	0.07109	0.0451549	9.60901	-0.164718	0.0176995	0.998726	10.0037	-0.173813	0.0178812	0.99384	Yes	Yes	Yes	Yes
O95059	RPP14	4	4	1	1.00068	0.957826	0.95406	0.963803	0.950053	0.816169	0.682007	0.582705	0.553247	0.544501	0.545364	0.523308	0.427855	0.532745	0.563035	1	1.08404	1.10546	1.11803	1.03524	1.01028	0.856483	0.636258	0.557542	0.520685	0.490359	0.403063	0.466539	0.436112	0.533314	0.383269		-0.124732	0.511162	0.976325	12.1228	-0.162457	0.449869	0.958016	Yes	Yes
O95067	CCNB2	7	7	1	1.02455	0.915779	0.93943	0.868109	0.747133	0.540823	0.373005	0.220555	0.135381	0.101793	0.0741549	0.062358	0.0459532	0.0482673	0.0578006	1	0.978544	1.01851	0.942647	0.843707	0.7618	0.558867	0.391112	0.300994	0.215143	0.169333	0.155011	0.14222	0.111115	0.150053	0.182154	8.87789	-0.179704	0	0.993575	9.03497	-0.159001	0.0815821	0.993041	Yes	Yes	Yes	Yes
O95070	YIF1A	2	1	1	1.2023	1.0786	1.08296	1.04408	0.995672	0.743421	0.638511	0.474165	0.421465	0.303012	0.260144	0.220659	0.198413	0.212924	0.148583	1	1.16421	1.16985	1.09032	1.04974	0.842687	0.78644	0.467054	0.45882	0.303934	0.274314	0.172868	0.165092	0.179973	0.159654	0.224399	11.1358	-0.13509	0.129189	0.969568	10.289	-0.161225	0.145766	0.962398	Yes	Yes	Yes	Yes
O95071	UBR5	71	68	1	0.998249	0.984662	0.975219	0.931516	0.821855	0.646609	0.437738	0.294235	0.192096	0.127387	0.0965649	0.0741779	0.0676027	0.0658055	0.0681534	1	1.01082	1.00457	1.00852	0.951015	0.842154	0.658618	0.459537	0.316843	0.203801	0.144643	0.108966	0.0883945	0.0717043	0.0710544	0.0721554	9.53279	-0.172827	0.00840819	0.998749	9.68328	-0.171389	0.0182174	0.999412	Yes	Yes	Yes	Yes
O95081	AGFG2	2	1	1	0.99158	1.07569	1.02919	0.979248	0.912029	0.822898	0.602669	0.517477	0.39971	0.387971	0.33933	0.350762	0.300342	0.31873	0.348674	1	0.993413	0.833316	0.863272	1.06961	1.0177	0.843521	0.826751	0.694998	0.641083	0.509938	0.544488	0.535905	0.470418	0.535735	0.526556	11.1773	-0.143404	0.306444	0.991815		-0.0962299	0.490559	0.900102	Yes	Yes
O95096	NKX2-2	1	1	1	0.924595	1.00844	0.920442	0.855696	0.76065	0.675003	0.642225	0.626701	0.566857	0.611855	0.549383	0.567034	0.527023	0.690937	0.738449	1	1.01996	0.871191	0.850633	0.828381	0.708337	0.852188	0.821668	0.526562	0.480555	0.506943	0.38677	0.406317	0.400448	0.430762	0.525245		-0.104195	0.599197	0.881715	14.488	-0.0626932	0	0.847684	Yes	Yes		Yes
O95104	SCAF4	10	9	1	1.00022	0.97672	0.970096	0.916317	0.869467	0.719028	0.605932	0.455357	0.400653	0.346417	0.31725	0.261897	0.228812	0.238741	0.249217	1	0.998595	1.01158	0.993814	1.01266	0.897016	0.741116	0.566173	0.398143	0.319507	0.220432	0.176875	0.151779	0.123443	0.0934756	0.106144	10.9513	-0.11352	0.147241	0.996366	10.4676	-0.150095	0.0471754	0.998873	Yes	Yes	Yes	Yes
O95139	NDUFB6	8	9	1	1.02609	0.942113	0.991336	0.948739	0.852615	0.74596	0.576251	0.424719	0.328985	0.219327	0.182215	0.155707	0.125055	0.117361	0.129866	1	0.963725	0.911625	0.955704	0.917894	0.844229	0.802264	0.616758	0.470538	0.349864	0.225426	0.194083	0.127713	0.0917398	0.0868186	0.0889033	10.5102	-0.136965	0.0292632	0.996123	10.8238	-0.137229	0	0.988946	Yes	Yes	Yes	Yes
O95140	MFN2	14	9	1	1.00397	0.971712	0.961884	0.925152	0.796894	0.596284	0.376882	0.241737	0.157516	0.105148	0.0822168	0.0792356	0.0631358	0.0675956	0.0534342	1	0.930689	0.953378	0.962036	0.888279	0.76103	0.558927	0.376378	0.26075	0.166753	0.123714	0.0866617	0.070054	0.0654593	0.0594561	0.0675325	9.17809	-0.187965	0.0183682	0.998482	9.03879	-0.17049	0	0.995545	Yes	Yes	Yes	Yes
O95147	DUSP14		3																	1	1.02618	1.16093	1.18357	1.0313	0.987466	0.871285	0.746737	0.694881	0.530757	0.490306	0.497215	0.446946	0.391262	0.509945	0.522209					14.3523	-0.11669	0.452135	0.930615		Yes
O95149	SNUPN	4	6	1	0.978492	0.886131	0.954332	0.925902	0.827765	0.722916	0.600956	0.38127	0.212436	0.107562	0.0674987	0.0339216	0.0480431	0.0427195	0.0297952	1	0.988789	0.90149	0.957689	0.965979	0.859162	0.816239	0.631374	0.427843	0.235773	0.149865	0.0930126	0.0510003	0.0331812	0.0356554	0.0272497	10.1673	-0.178417	0	0.984288	10.5986	-0.183566	0	0.990509	Yes	Yes	Yes	Yes
O95154	AKR7A3		2																	1	1.00893	1.11303	1.08464	1.0993	0.949332	0.587633	0.415588	0.290203	0.269583	0.204728	0.137193	0.128483	0.0821491	0.110934	0.0961919					9.54479	-0.207974	0.106929	0.98113		Yes		Yes
O95155-4	UBE4B	30	26	1	0.988827	0.993377	0.997808	0.943025	0.85133	0.697031	0.463572	0.31166	0.198235	0.134025	0.100484	0.0690054	0.0592107	0.0508172	0.045233	1	1.02385	0.98823	0.990856	0.943017	0.862918	0.690911	0.476469	0.335083	0.217768	0.152897	0.107149	0.0713261	0.0522533	0.0501103	0.0473472	9.77872	-0.175061	0	0.999177	9.86151	-0.169566	0	0.999084	Yes	Yes	Yes	Yes
O95158	NXPH4	1		1	1.17338	1.01927	0.932435	0.980058	0.800012	0.676045	0.400133	0.29458	0.18727	0.100783	0.0737762	0.0482948	0.031679	0.0377905	0																	9.50778	-0.186964	0	0.985495					Yes		Yes
O95159	ZFPL1	4	8	1	1.05691	1.03981	1.01542	1.03112	0.920926	0.839111	0.648837	0.533153	0.411444	0.336454	0.248466	0.191232	0.16684	0.151224	0.137715	1	0.970518	0.995446	1.01027	0.969937	0.914915	0.747827	0.621721	0.495683	0.380973	0.285203	0.19742	0.161405	0.110706	0.0745032	0.0667709	11.4888	-0.125489	0.048114	0.995483	11.0018	-0.132015	0	0.997103	Yes	Yes	Yes	Yes
O95163	IKBKAP	46	49	1	1.00881	0.97858	0.984071	0.974287	0.861487	0.685508	0.442793	0.28164	0.1745	0.115713	0.0874189	0.0600147	0.0514352	0.0506999	0.0468773	1	1.01668	0.987623	0.982416	0.977126	0.857492	0.66387	0.44254	0.289847	0.178313	0.122628	0.0822236	0.0576013	0.0407575	0.0405562	0.0407821	9.66553	-0.192301	0.0127989	0.999398	9.64178	-0.18552	0	0.999538	Yes	Yes	Yes	Yes
O95164	UBL3	2	3	1	1.12411	0.975015	0.997159	0.996977	1.01782	0.887903	0.993842	0.872632	1.02556	0.758195	0.690867	0.640927	0.509958	0.480004	0.584823	1	1.05224	0.950064	0.974552	0.999829	1.04975	0.824802	0.771775	0.677902	0.590287	0.535081	0.506771	0.452714	0.414383	0.503438	0.297486		-0.120341	0.523193	0.89911	14.6484	-0.0806718	0.300524	0.964403	Yes	Yes
O95166	GABARAP	4	2	1	1.0036	1.00638	0.928399	1.01262	0.944777	0.86465	0.714414	0.653517	0.580572	0.608706	0.621002	0.653632	0.566393	0.790633	0.967017	1	0.969099	0.888691	0.88044	0.909721	0.870013	0.807801	0.7544	0.541548	0.5517	0.45583	0.432443	0.506891	0.49823	0.697826	0.735265		-0.175596	0.680083	0.705293		-0.11846	0.545421	0.756341	Yes	Yes
O95167	NDUFA3	5	6	1	1.14847	1.19284	1.17669	1.1944	1.01726	0.905404	0.734241	0.514292	0.486995	0.444916	0.371832	0.364655	0.312402	0.374531	0.453692	1	1.29345	1.25633	1.18917	1.30404	1.06807	1.02666	0.872538	0.557017	0.57016	0.480028	0.471147	0.438626	0.367718	0.430234	0.41468	11.6995	-0.174361	0.377101	0.920498	12.3564	-0.203615	0.43416	0.844357	Yes	Yes
O95168	NDUFB4	8	4	1	0.992667	1.04895	1.00896	0.911127	0.81134	0.622726	0.401758	0.275385	0.18933	0.126001	0.10034	0.0936106	0.0735987	0.0691107	0.0423551	1	0.935514	0.970589	0.964319	0.887165	0.715933	0.517129	0.348825	0.215283	0.12642	0.0974207	0.0655299	0.0460273	0.0277632	0.0393395	0.0271483	9.36978	-0.173253	0.00960956	0.997998	8.74775	-0.187652	0	0.99648	Yes	Yes	Yes	Yes
O95169	NDUFB8	9	9	1	0.998219	0.986832	0.994507	1.01328	0.92214	0.828097	0.727071	0.613904	0.532307	0.52918	0.50044	0.511601	0.449765	0.599266	0.716415	1	1.0171	0.972854	1.01564	0.935092	0.919274	0.801313	0.705611	0.543844	0.492641	0.445445	0.392025	0.388098	0.356189	0.450486	0.517671		-0.129744	0.543101	0.924887	12.2402	-0.127142	0.4023	0.972746	Yes	Yes
O95178	NDUFB2		1																	1	1.18151	1.03464	1.14469	1.13387	1.00207	1.00316	0.801859	0.628935	0.592696	0.457358	0.393527	0.409066	0.335461	0.412919	0.335206					12.9922	-0.131987	0.347818	0.945255		Yes
O95182	NDUFA7	7	7	1	0.938815	0.962378	0.925231	0.873648	0.844926	0.769648	0.639097	0.514633	0.414449	0.391425	0.349171	0.372825	0.322361	0.418027	0.495176	1	1.11593	0.946537	0.980341	0.920836	0.848793	0.736208	0.642817	0.516988	0.409893	0.325421	0.290546	0.295102	0.280523	0.355248	0.338131	11.4746	-0.117581	0.34863	0.947763	11.1129	-0.118653	0.245374	0.974949	Yes	Yes		Yes
O95197-5	RTN3	1	3	1	1.11489	1.24864	1.12064	1.11661	1.05484	1.07386	0.809644	0.657064	0.675677	0.618198	0.634249	0.463145	0.514357	0.436093	0.399716	1	0.983077	0.9963	0.871648	0.865999	0.93915	0.808133	0.675167	0.621177	0.549953	0.472351	0.431477	0.435823	0.398824	0.383221	0.307508	16.3545	-0.0845737	0.405269	0.877973	13.7876	-0.067563	0	0.972177	Yes	Yes		Yes
O95197	RTN3	8	8	1	1.03465	1.0444	1.03837	0.994867	0.961728	0.876346	0.784336	0.665401	0.597845	0.554037	0.487841	0.468848	0.396484	0.356941	0.325413	1	0.985877	1.06546	1.04783	1.02203	0.956059	0.866015	0.779949	0.630751	0.522766	0.449642	0.423511	0.376058	0.33927	0.327799	0.234622	14.5549	-0.075268	0.178539	0.99289	13.1061	-0.0963704	0.189041	0.991492	Yes	Yes	Yes	Yes
O95199	RCBTB2		1																	1	1.04613	0.942197	0.975434	0.893789	0.829609	0.662178	0.487741	0.348216	0.274974	0.188222	0.185216	0.140782	0.129664	0.165722	0.114719					9.81742	-0.146271	0.0587931	0.994227		Yes		Yes
O95201	ZNF205		1																	1	0.9961	0.840935	0.888699	0.773097	0.829733	0.566259	0.400486	0.266491	0.183952	0.0920425	0.115418	0.142363	0	0.0741526	0.0793704					9.08871	-0.161508	0	0.965461		Yes		Yes
O95202	LETM1	54	45	1	0.971167	0.975035	0.948914	0.99686	0.961672	0.83821	0.656321	0.496538	0.367035	0.26691	0.187997	0.123879	0.0971923	0.0661317	0.051588	1	0.971333	1.01752	0.976392	0.959691	0.915929	0.802323	0.630227	0.495045	0.382307	0.275947	0.212716	0.143363	0.097454	0.0668297	0.0551335	11.2151	-0.147002	0	0.997566	11.1078	-0.136998	0	0.997211	Yes	Yes	Yes	Yes
O95208	EPN2	10	11	1	0.998699	0.96407	1.03819	1.03694	0.947311	0.913995	0.835183	0.753639	0.729761	0.738382	0.761918	0.783598	0.651748	0.86533	1.06872	1	0.947023	1.03642	1.03792	0.96667	0.935773	0.89514	0.745961	0.656669	0.604455	0.544007	0.538566	0.574385	0.521759	0.634203	0.615243		-0.0962667	0.795222	0.551573		-0.12033	0.566495	0.965511	Yes	Yes
O95210	STBD1	8	4	1	0.960935	0.925083	0.932704	0.867452	0.810481	0.685289	0.512444	0.374123	0.27341	0.201087	0.146776	0.114893	0.107628	0.0832722	0.0846649	1	1.05033	1.14642	1.02973	1.21189	1.00936	0.765043	0.629995	0.479453	0.363368	0.282001	0.230946	0.174252	0.106426	0.114662	0.116228	9.92621	-0.139583	0	0.990615	11.0624	-0.147946	0.0669344	0.967377	Yes	Yes	Yes	Yes
O95214-2	LEPROTL1	1	1	1	1.06479	1.13238	1.32074	1.19811	1.35986	1.19151	1.05403	0.879598	0.814355	0.763374	0.695168	0.522419	0.392839	0.37786	0.261628	1	1.14497	1.17294	1.549	1.35063	1.35774	1.18637	1.02845	1.01832	0.760855	0.743736	0.760321	0.534233	0.522865	0.30112	0.161637	16.5762	-0.096972	0.11326	0.807747	16.785	-0.102452	0	0.706204	Yes	Yes	Yes
O95218-2	ZRANB2	19		1	0.982088	1.02416	1.0116	0.988651	0.94725	0.883694	0.775366	0.683361	0.581307	0.512847	0.462705	0.442918	0.378734	0.41302	0.335762																	14.1464	-0.0847536	0.270252	0.996838					Yes		Yes
O95218	ZRANB2		12																	1	0.882059	0.976008	0.922987	0.961874	0.983037	0.804274	0.612599	0.519348	0.464869	0.276157	0.247837	0.286315	0.298762	0.298593	0.174523					11.259	-0.135925	0.202984	0.971585		Yes		Yes
O95219	SNX4	15	6	1	1.0137	0.996218	0.982094	0.91106	0.881642	0.692319	0.462595	0.301245	0.195064	0.140518	0.108443	0.0875549	0.0666281	0.0675451	0.0672355	1	1.06995	1.05723	1.08982	1.00792	0.898473	0.713614	0.543128	0.36696	0.218926	0.176117	0.109696	0.0915008	0.055974	0.0282505	0.0827889	9.76037	-0.182099	0.0267261	0.997906	10.1651	-0.170955	0.00709425	0.99229	Yes	Yes	Yes	Yes
O95229	ZWINT	7	9	1	1.01449	1.00799	0.994225	0.993553	0.910276	0.829202	0.73964	0.668901	0.580582	0.519113	0.460342	0.396508	0.345059	0.329851	0.281049	1	0.987844	0.963824	0.974839	0.953054	0.945354	0.846569	0.746793	0.606548	0.524188	0.450815	0.369758	0.372965	0.315678	0.305065	0.211866	13.9361	-0.0729013	0	0.9985	12.9359	-0.0899448	0.0971195	0.995301	Yes	Yes	Yes	Yes
O95232	LUC7L3	24	10	1	0.938685	0.936593	0.918634	0.890142	0.800272	0.61445	0.410774	0.307201	0.202312	0.135287	0.0940759	0.0724588	0.0601881	0.0581051	0.0797581	1	1.0111	0.981894	0.996321	0.957326	0.792984	0.630774	0.423908	0.285186	0.183996	0.115274	0.0686044	0.0418949	0.0311059	0.0258911	0.0246365	9.36334	-0.163601	0	0.991696	9.42137	-0.182846	0	0.998239	Yes	Yes	Yes	Yes
O95235	KIF20A	9	8	1	1.01078	1.00184	0.959513	0.904722	0.767358	0.594116	0.378116	0.272836	0.193081	0.153312	0.177677	0.214133	0.211089	0.171917	0.265672	1	0.985915	0.968725	0.988467	0.908618	0.785949	0.634273	0.438761	0.289522	0.201583	0.173753	0.12213	0.143428	0.107127	0.0975314	0.127503	9.0166	-0.200015	0.173976	0.988921	9.41528	-0.165666	0.0571293	0.996736	Yes	Yes	Yes	Yes
O95239	KIF4A	52	30	1	0.98889	0.940676	0.947357	0.888648	0.755311	0.569239	0.334307	0.200651	0.127381	0.0887137	0.070288	0.0635674	0.0557266	0.0555088	0.0570359	1	0.983547	0.982286	0.946947	0.888363	0.747173	0.562223	0.341772	0.202956	0.117167	0.0825721	0.0615745	0.0544656	0.047462	0.0553094	0.0494325	8.89854	-0.191579	0.00729784	0.995407	8.87828	-0.190865	0	0.996721	Yes	Yes	Yes	Yes
O95248-4	SBF1	12	12	1	0.988878	0.966091	0.923044	0.912425	0.73838	0.546108	0.310482	0.194572	0.119427	0.0863806	0.060669	0.0409269	0.0539687	0.0469539	0.020284	1	0.999523	0.963384	0.926528	0.853031	0.733354	0.511609	0.306849	0.192008	0.12226	0.0840984	0.0579124	0.0482867	0.0313606	0.0461076	0.0399779	8.80099	-0.196981	0	0.996577	8.6481	-0.19213	0	0.995764	Yes	Yes	Yes	Yes
O95249	GOSR1	7	8	1	0.988826	1.01084	0.990177	0.942476	0.882973	0.700122	0.518901	0.377288	0.253926	0.196935	0.162003	0.139572	0.112157	0.113058	0.146226	1	0.966646	1.05469	1.02632	0.965644	0.875117	0.750266	0.546393	0.415963	0.296716	0.221967	0.18594	0.157726	0.149686	0.153154	0.167194	10.0659	-0.162187	0.0747545	0.998152	10.3472	-0.155929	0.103381	0.99611	Yes	Yes	Yes	Yes
O95251	KAT7	6	3	1	1.03192	0.96511	0.943952	0.930334	0.771352	0.606647	0.419886	0.299205	0.182388	0.135289	0.087291	0.0781185	0.0711548	0.0601621	0.0623938	1	1.05632	0.981379	0.921469	0.986751	0.916013	0.64921	0.423876	0.344003	0.212281	0.203681	0.174564	0.151139	0.130339	0.0945095	0.121162	9.32582	-0.165883	0	0.997052	9.68303	-0.189978	0.107577	0.99318	Yes	Yes	Yes	Yes
O95258-3	SLC25A14		1																	1	1.0389	1.04873	0.978752	0.849011	0.641849	0.591432	0.483046	0.350283	0.201461	0.202816	0.145965	0.128017	0.0970846	0.114494	0.110154					9.1648	-0.135713	0	0.989927		Yes		Yes
O95260-2	ATE1	14	12	1	1.03433	1.02909	1.00278	1.02968	0.996626	0.890301	0.86394	0.764036	0.747252	0.718394	0.679198	0.650717	0.5369	0.377249	0.146126	1	0.920628	0.978747	1.04682	0.999131	0.945335	0.848373	0.763933	0.67475	0.617164	0.580384	0.537086	0.508799	0.470941	0.322832	0.113784	16.8438	-0.0687013	0	0.922675	14.7081	-0.0708766	0	0.945979	Yes	Yes	Yes	Yes
O95260	ATE1	1		1	1.15816	1.06395	0.944616	0.9373	0.952813	0.734201	0.682258	0.556783	0.446671	0.485639	0.392561	0.313204	0.344081	0.252526	0																	12.2544	-0.0914931	0	0.947425					Yes		Yes
O95271	TNKS	3	3	1	1.46261	1.15503	1.04107	0.976609	0.825739	0.719556	0.598842	0.437139	0.390696	0.260996	0.303604	0.288578	0.272187	0.276647	0.25629	1	0.939036	1.10078	1.04415	0.899747	0.813782	0.754444	0.592785	0.36739	0.281215	0.279158	0.233043	0.166278	0.223271	0.177394	0.216337	10.602	-0.132401	0.215817	0.890963	10.3073	-0.143415	0.134975	0.980099	Yes	Yes	Yes	Yes
O95273	CCNDBP1	6	5	1	1.049	1.02526	1.00118	1.01897	1.01799	0.919919	0.762987	0.596809	0.480443	0.358424	0.255316	0.194582	0.14051	0.127211	0.139691	1	1.02305	1.04547	0.985618	0.994868	1.02353	0.909238	0.821286	0.715803	0.573629	0.417842	0.328135	0.246659	0.190569	0.189661	0.183795	12.1329	-0.13787	0.0567959	0.99606	12.9379	-0.124592	0.0857219	0.995192	Yes	Yes	Yes	Yes
O95292	VAPB	11	13	1	0.98366	0.947758	0.943657	1.00025	0.942273	0.83266	0.786389	0.696955	0.615713	0.565717	0.478151	0.41723	0.33822	0.311654	0.262344	1	0.974974	0.984443	0.958562	1.0487	0.974006	0.838673	0.712596	0.63521	0.55991	0.454914	0.40137	0.353435	0.306599	0.266238	0.169191	14.3098	-0.0738702	0	0.990535	13.1272	-0.0870918	0	0.991093	Yes	Yes	Yes	Yes
O95294-3	RASAL1	3	1	1	0.971357	0.930361	0.925209	0.844561	0.769204	0.624943	0.481446	0.342019	0.254736	0.177515	0.168061	0.13352	0.112017	0.11122	0.0884687	1	1.14146	1.10112	1.06103	1.06006	0.914669	0.813025	0.539341	0.456943	0.326546	0.216971	0.193911	0.134607	0.0899788	0.062554	0.0318056	9.53081	-0.135786	0	0.991965	10.7375	-0.148974	0	0.982732	Yes	Yes	Yes	Yes
O95295	SNAPIN	6	7	1	0.954494	0.991538	1.12189	0.98415	0.954016	0.803409	0.730981	0.591296	0.52569	0.479548	0.453425	0.387908	0.36834	0.412349	0.422062	1	0.945117	0.948965	1.06471	0.984691	0.899255	0.858339	0.698698	0.565246	0.461404	0.398506	0.338839	0.343529	0.318922	0.337161	0.288941	12.9524	-0.106163	0.363308	0.978529	11.9865	-0.119195	0.26368	0.989447	Yes	Yes		Yes
O95297	MPZL1	11	10	1	0.979125	1.00932	0.98137	0.933639	0.932225	0.852183	0.796268	0.723415	0.679473	0.652181	0.671613	0.696298	0.583349	0.72057	0.915335	1	0.983604	0.959762	0.970884	0.939374	0.905115	0.792026	0.676192	0.611773	0.536674	0.501096	0.494683	0.509345	0.514427	0.663178	0.707743		-0.0855173	0.700686	0.773464		-0.130569	0.558806	0.905187	Yes	Yes
O95298	NDUFC2	9	6	1	1.01723	1.0189	1.03412	0.955502	0.867006	0.690632	0.493064	0.343738	0.226656	0.153252	0.115837	0.0887581	0.0767981	0.0694574	0.0656427	1	1.07127	0.968364	0.991411	0.958385	0.841016	0.712743	0.531893	0.341427	0.248201	0.187666	0.120103	0.0893855	0.0714264	0.0634247	0.0627066	9.9221	-0.167035	0.0122458	0.998819	10.0567	-0.158002	0	0.996365	Yes	Yes	Yes	Yes
O95299	NDUFA10	27	17	1	0.971035	0.958043	0.965846	0.910685	0.765693	0.567802	0.336215	0.219981	0.137759	0.0956044	0.0751203	0.06263	0.0508677	0.0475899	0.0587712	1	0.972967	0.966844	0.993598	0.919257	0.766342	0.556742	0.362032	0.219248	0.139606	0.107157	0.0812217	0.0626068	0.0460552	0.0599218	0.0633157	8.96204	-0.191915	0.00958527	0.997563	8.98832	-0.190229	0.0137643	0.998448	Yes	Yes	Yes	Yes
O95302	FKBP9	26	15	1	1.01652	0.983985	0.985995	1.00012	0.943923	0.843034	0.803155	0.701849	0.677541	0.651502	0.637012	0.658375	0.576583	0.625945	0.376773	1	1.03456	1.05252	1.10267	1.04144	1.00285	0.890473	0.830794	0.740429	0.664978	0.628454	0.60014	0.604684	0.59757	0.640084	0.328268	20.6708	-0.0436059	0	0.940024	19.4826	-0.0540744	0.293091	0.914258	Yes	Yes	Yes	Yes
O95336	PGLS	15	20	1	1.09715	1.17505	1.14776	1.18567	1.11174	1.05161	1.00292	0.825004	0.786993	0.748235	0.613172	0.4145	0.293546	0.146136	0.130937	1	1.11419	1.1416	1.18682	1.14581	1.09899	1.01202	0.901786	0.783474	0.691125	0.589002	0.520096	0.391738	0.258355	0.111003	0.0615625	15.4174	-0.124592	0	0.932518	14.4295	-0.116367	0	0.943083	Yes	Yes	Yes	Yes
O95340-2	PAPSS2	12	16	1	1.0067	1.02641	0.973106	0.986158	0.985356	0.853233	0.733561	0.575974	0.430825	0.305005	0.201377	0.140537	0.126414	0.0967525	0.0926249	1	0.978065	0.975054	0.962766	0.995481	0.94131	0.836759	0.666449	0.559041	0.43398	0.330276	0.248459	0.133048	0.0926166	0.0818491	0.0722985	11.7512	-0.138641	0	0.99788	11.577	-0.132916	0	0.994578	Yes	Yes	Yes	Yes
O95342	ABCB11		1																	1	1.32625	1.02335	0.888773	1.03666	0.82515	0.769623	0.716778	0.586724	0.465639	0.49616	0.475875	0.381638	0.340612	0.427662	0.626877					13.2145	-0.107299	0.42237	0.845195		Yes
O95347	SMC2	63	55	1	0.967155	0.92225	0.921081	0.863902	0.753106	0.553652	0.329666	0.208647	0.122931	0.0798287	0.0569116	0.0451627	0.0421233	0.0429791	0.0448048	1	0.983667	0.93464	0.929409	0.875311	0.744141	0.555259	0.357986	0.224374	0.132021	0.0884594	0.0657655	0.0512349	0.0417476	0.0498448	0.0480041	8.8315	-0.191091	0	0.992116	8.88573	-0.184164	0	0.994349	Yes	Yes	Yes	Yes
O95352	ATG7	14	20	1	1.04523	1.05249	1.02116	1.00015	0.919206	0.765324	0.53249	0.352798	0.235075	0.159697	0.105368	0.0765002	0.0635926	0.0571109	0.0365685	1	1.02616	1.10458	1.06692	1.03766	0.92648	0.794761	0.586016	0.415995	0.322071	0.226399	0.17818	0.138997	0.107529	0.103938	0.0796175	10.2358	-0.180142	0.0108087	0.997937	10.676	-0.156654	0.0458489	0.992256	Yes	Yes	Yes	Yes
O95359-3	TACC2	27	25	1	1.01365	1.02816	1.02276	0.996024	0.949461	0.848887	0.801673	0.718769	0.669169	0.658822	0.637868	0.661452	0.554883	0.620653	0.573164	1	0.996982	1.0199	1.00436	0.993385	0.960251	0.830763	0.788315	0.727539	0.639282	0.590595	0.549219	0.559429	0.52404	0.568261	0.46047		-0.0642792	0.56233	0.983338	20.8464	-0.0680206	0.440557	0.988157	Yes	Yes
O95361	TRIM16	13	11	1	1.05026	1.0745	1.01415	1.02176	0.965835	0.823613	0.635834	0.500924	0.360185	0.297356	0.229507	0.181895	0.151606	0.124907	0.106228	1	0.988504	1.01622	1.03093	0.93882	0.91053	0.758777	0.607279	0.485607	0.359376	0.259543	0.192569	0.15525	0.119603	0.0976401	0.090918	11.2043	-0.139551	0.0577531	0.995059	10.9028	-0.131956	0	0.997914	Yes	Yes	Yes	Yes
O95363	FARS2	8	5	1	1.02518	0.998521	0.968218	0.912963	0.788015	0.624252	0.416128	0.27035	0.171589	0.124623	0.09825	0.0825592	0.0630359	0.0798251	0.0684205	1	0.988811	0.978611	0.982627	0.896072	0.793826	0.567782	0.359327	0.236212	0.152963	0.109037	0.0728185	0.0593477	0.0434469	0.0442471	0.0372677	9.32988	-0.172584	0.0104884	0.99784	9.07237	-0.185529	0	0.998751	Yes	Yes	Yes	Yes
O95365	ZBTB7A	6	4	1	0.98042	0.95592	0.973035	0.9398	0.851681	0.740175	0.576917	0.430965	0.378334	0.329141	0.300272	0.293249	0.226247	0.245255	0.333721	1	0.987057	1.00973	1.03782	0.90522	0.797785	0.716271	0.510544	0.383985	0.337985	0.260101	0.22278	0.165755	0.158106	0.149363	0.130101	10.6035	-0.135296	0.231239	0.989979	10.2153	-0.12554	0.0297476	0.995902	Yes	Yes	Yes	Yes
O95372	LYPLA2	12	17	1	1.18031	1.14008	1.14515	1.15928	1.0631	0.939936	0.910529	0.680754	0.633354	0.527896	0.475038	0.410116	0.353132	0.372443	0.307441	1	1.14777	1.14518	1.12073	1.19076	1.07077	0.980394	0.875152	0.656828	0.598518	0.51055	0.397043	0.334593	0.309951	0.28377	0.189244	14.0648	-0.105172	0.288941	0.93102	13.5007	-0.111465	0.16452	0.943947	Yes	Yes	Yes	Yes
O95373	IPO7	43	39	1	1.00996	0.995672	0.983289	0.959921	0.871501	0.695053	0.454505	0.314604	0.204256	0.139544	0.103745	0.0736708	0.0596462	0.0536189	0.047353	1	1.04195	1.02102	1.02638	0.976205	0.856032	0.679985	0.496487	0.348427	0.233165	0.169229	0.122086	0.0948755	0.0736944	0.0660758	0.0551699	9.79481	-0.178362	0.00883324	0.999569	9.93858	-0.160542	0.000345592	0.998604	Yes	Yes	Yes	Yes
O95376	ARIH2	14	11	1	1.01761	0.997383	1.02269	1.00204	0.89457	0.821071	0.687291	0.521805	0.354825	0.242204	0.193188	0.154121	0.142535	0.150509	0.169019	1	1.05043	1.01534	1.05024	0.999045	0.927964	0.847505	0.730826	0.49254	0.329172	0.250698	0.147496	0.0827658	0.0742666	0.076284	0.057986	11.1576	-0.149833	0.0851807	0.995002	11.2433	-0.161568	0	0.9959	Yes	Yes	Yes	Yes
O95379	TNFAIP8	2	1	1	0.930366	1.00341	1.02514	1.00868	0.925696	0.920167	0.82027	0.777368	0.640068	0.601202	0.435551	0.379576	0.308654	0.162929	0.064446	1	1.28816	1.26544	1.34673	1.45065	1.17185	0.875799	0.962064	0.8855	0.733474	0.571427	0.508823	0.377589	0.333933	0.214659	0.182209	14.0946	-0.101895	0	0.977824	14.7995	-0.109269	0.0595331	0.801993	Yes	Yes	Yes	Yes
O95382	MAP3K6	5	8	1	1.0312	1.01521	1.0002	1.00981	0.873838	0.703408	0.461233	0.335997	0.215226	0.165374	0.134799	0.10824	0.0818926	0.0848394	0.0627052	1	1.0124	0.959357	1.01292	0.915763	0.755857	0.620965	0.433891	0.290703	0.187624	0.148714	0.112919	0.0941006	0.0760743	0.077226	0.0672134	9.87055	-0.17856	0.0440919	0.998695	9.35932	-0.159645	0	0.997539	Yes	Yes	Yes	Yes
O95391	SLU7	4		1	0.988792	0.989637	0.95491	0.892334	0.80392	0.623199	0.44764	0.343236	0.275501	0.252792	0.229645	0.229698	0.18582	0.235748	0.233504																	9.50826	-0.15754	0.179544	0.995383					Yes		Yes
O95394-4	PGM3	29	22	1	0.978822	0.986393	0.982051	0.959478	0.944095	0.820348	0.680143	0.504131	0.342513	0.213708	0.130774	0.0735027	0.0582331	0.039413	0.0249461	1	0.98726	0.982571	0.974433	0.977564	0.937827	0.813956	0.659901	0.520448	0.375971	0.263125	0.168804	0.0937743	0.0617006	0.0348334	0.0243911	11.0941	-0.166179	0	0.996991	11.1842	-0.153169	0	0.995769	Yes	Yes	Yes	Yes
O95396	MOCS3	12	11	1	0.991222	1.01617	0.989029	0.948349	0.823572	0.659255	0.458406	0.335776	0.240638	0.175875	0.150373	0.127801	0.118987	0.123547	0.116404	1	1.01162	0.967214	0.962461	0.937693	0.82127	0.605323	0.42282	0.301534	0.208608	0.162763	0.119258	0.0924744	0.0685239	0.0696533	0.0678958	9.69092	-0.163261	0.0662857	0.999157	9.45945	-0.164881	0.012287	0.9988	Yes	Yes	Yes	Yes
O95400	CD2BP2	18	11	1	0.99597	1.03602	1.02493	1.00339	0.954048	0.839054	0.786398	0.677338	0.597502	0.527156	0.452369	0.392823	0.310105	0.20266	0.09439	1	1.05505	1.01786	1.038	0.983214	0.896884	0.831656	0.779355	0.664499	0.611099	0.52053	0.42753	0.384371	0.304144	0.217789	0.0995526	13.5969	-0.0899215	0	0.983647	13.4695	-0.0884068	0	0.981617	Yes	Yes	Yes	Yes
O95402	MED26	2	3	1	0.942377	0.972682	0.965807	0.888771	0.874509	0.779831	0.61142	0.480928	0.437092	0.363834	0.328158	0.284938	0.2483	0.282472	0.301702	1	0.966343	0.909206	0.937674	0.848389	0.813705	0.68091	0.641019	0.486081	0.415277	0.349046	0.289804	0.230007	0.222522	0.201617	0.173159	11.254	-0.11214	0.19528	0.987481	10.9626	-0.0981955	0	0.985283	Yes	Yes	Yes	Yes
O95405	ZFYVE9	6	3	1	1.05566	1.04603	0.987991	1.01405	0.929004	0.827176	0.711949	0.558204	0.486895	0.396796	0.331416	0.307345	0.233466	0.234085	0.275496	1	0.996892	0.945158	0.978703	1.02166	0.891169	0.787385	0.675264	0.553253	0.395205	0.283834	0.23864	0.228493	0.145869	0.0635068	0.0612655	12.0415	-0.112573	0.170461	0.992993	11.4027	-0.126267	0	0.99251	Yes	Yes	Yes	Yes
O95425	SVIL	6	4	1	1.11056	1.04551	1.06089	1.03268	0.877691	0.774079	0.600432	0.446291	0.376147	0.338221	0.286306	0.258892	0.222729	0.223624	0.292628	1	1.06845	1.0572	1.04535	1.05227	0.858493	0.740177	0.56906	0.430273	0.299309	0.238698	0.221482	0.205724	0.148584	0.130647	0.148498	10.787	-0.144036	0.216958	0.985197	10.4776	-0.147467	0.0961194	0.991276	Yes	Yes	Yes	Yes
O95429	BAG4	9	7	1	1.40693	1.06772	0.987933	0.985175	0.962827	0.876226	0.860123	0.795842	0.78943	0.771273	0.874537	0.840584	0.740072	0.963678	1.27934	1	1.08423	1.05929	1.07281	1.05977	1.07405	0.934468	0.874297	0.774645	0.72525	0.701572	0.659793	0.726296	0.733865	0.863006	0.985234		-0.575792	0.87911	0.218276		-0.107242	0.770258	0.714189	Yes	Yes
O95433	AHSA1	55	50	1	0.983001	0.956099	0.976251	0.9578	0.887345	0.734497	0.522511	0.361596	0.228615	0.155285	0.107478	0.0734024	0.0611178	0.0512582	0.036677	1	0.998595	0.971356	0.962284	0.975112	0.907436	0.747307	0.550032	0.380922	0.26567	0.177966	0.126518	0.0861526	0.0665545	0.049304	0.0404308	10.1281	-0.170997	0	0.998449	10.324	-0.16427	0	0.998946	Yes	Yes	Yes	Yes
O95453	PARN	29	33	1	0.975073	0.988719	0.978619	0.975503	0.940411	0.837079	0.757244	0.650752	0.558649	0.485868	0.389084	0.325555	0.245562	0.110333	0.0769439	1	1.02756	1.02726	1.03459	1.00685	0.929659	0.815859	0.725085	0.616555	0.521249	0.446724	0.385481	0.309266	0.250065	0.147008	0.0972182	12.9086	-0.101897	0	0.984873	12.5895	-0.099124	0	0.990458	Yes	Yes	Yes	Yes
O95455	TGDS	2	4	1	1.11841	1.12602	0.982615	0.934426	0.943003	0.934879	0.811508	0.751869	0.76015	0.776567	0.74675	0.63918	0.651384	0.788874	0.992762	1	1.09191	1.08391	1.09632	1.038	1.00927	0.903533	0.78143	0.670708	0.589573	0.53446	0.549316	0.556786	0.521583	0.622748	0.636865		-0.10921	0.762074	0.655374		-0.13572	0.567209	0.948607	Yes	Yes
O95456	PSMG1	17	16	1	1.02447	1.03187	1.01341	1.02358	0.96516	0.918737	0.861789	0.797306	0.740286	0.745546	0.749176	0.762332	0.624929	0.822944	0.94451	1	1.04911	0.984835	1.003	1.01183	1.00527	0.910768	0.84449	0.738012	0.73691	0.674003	0.623438	0.701882	0.67303	0.807798	0.748844		-0.0775946	0.769914	0.759778		-0.0977358	0.705528	0.919409	Yes	Yes
O95470	SGPL1	23	14	1	0.980723	0.947655	0.945163	0.889662	0.754151	0.556989	0.329738	0.209437	0.133643	0.0914352	0.0656101	0.0561021	0.0476802	0.0463648	0.0423781	1	0.995714	0.959653	0.932321	0.911503	0.741346	0.553467	0.3265	0.212719	0.137187	0.0919322	0.0645592	0.0621608	0.0484289	0.0535305	0.0573346	8.87999	-0.189463	0	0.996477	8.86122	-0.189677	0.00481058	0.996778	Yes	Yes	Yes	Yes
O95471	CLDN7	3	3	1	1.07801	1.11581	1.05661	1.10902	1.03822	0.95387	0.82147	0.748002	0.726488	0.746927	0.692014	0.644724	0.523449	0.70574	0.871408	1	0.917665	1.26406	1.09183	1.17352	1.02498	1.06157	0.928843	0.739576	0.769038	0.596265	0.634672	0.792123	0.860909	0.858127	0.466547		-0.109316	0.697937	0.806764		-0.198178	0.710331	0.64085	Yes	Yes
O95476	CTDNEP1	2	5	1	1.13131	1.07008	1.024	0.931239	0.780016	0.612733	0.431301	0.280045	0.17576	0.103033	0.0692458	0.0865917	0.0554327	0.0607059	0.0996137	1	1.04485	0.950738	0.96714	0.933438	0.7225	0.644133	0.427479	0.276058	0.193503	0.165503	0.112281	0.0937753	0.0501914	0.0849574	0.063195	9.3351	-0.175983	0.0116832	0.988717	9.33324	-0.15911	0	0.994068	Yes	Yes	Yes	Yes
O95478	NSA2	7	6	1	0.961129	0.979104	0.958551	0.894074	0.768045	0.582348	0.373869	0.285894	0.185882	0.149724	0.117649	0.129691	0.0928393	0.105112	0.13218	1	1.02488	0.986895	0.988488	0.905897	0.782785	0.640281	0.469276	0.341292	0.232919	0.194983	0.158799	0.15269	0.138446	0.16934	0.158687	9.10202	-0.172833	0.0606305	0.996079	9.56591	-0.153768	0.0868481	0.996276	Yes	Yes	Yes	Yes
O95479	H6PD	4	3	1	1.00044	0.976696	0.954868	1.00775	0.887521	0.830775	0.714978	0.515765	0.339654	0.245948	0.172315	0.150943	0.122972	0.11069	0.102784	1	0.955756	1.11756	0.990065	0.985789	0.957302	0.8779	0.818862	0.564865	0.451641	0.307336	0.224473	0.192234	0.147059	0.148696	0.100588	11.2329	-0.148819	0.0344658	0.995148	11.9429	-0.145089	0.0596713	0.99013	Yes	Yes	Yes	Yes
O95486	SEC24A	22	19	1	1.00665	1.01238	0.979038	0.97317	0.868533	0.703659	0.488089	0.31742	0.218009	0.145151	0.101139	0.0819623	0.0708185	0.0656805	0.057774	1	0.909597	0.930903	0.899042	0.892422	0.817538	0.611078	0.426446	0.284481	0.20267	0.130925	0.090895	0.0601394	0.0569327	0.0780213	0.0350065	9.88833	-0.176265	0.0160874	0.999491	9.38969	-0.168397	0	0.98814	Yes	Yes	Yes	Yes
O95487	SEC24B	28	15	1	1.01134	1.0006	0.98206	0.922303	0.81291	0.64729	0.436592	0.297455	0.188621	0.146067	0.113077	0.0913461	0.0842216	0.0915796	0.0877859	1	1.00879	1.01651	0.981136	0.928975	0.818074	0.608931	0.404887	0.279317	0.176366	0.111274	0.0735653	0.0499383	0.0350365	0.0336855	0.0398938	9.50412	-0.171887	0.0317065	0.998383	9.3544	-0.182939	0	0.998933	Yes	Yes	Yes	Yes
O95502	NPTXR	4	4	1	1.00721	0.978241	0.938507	0.984672	0.936746	0.769213	0.719283	0.626857	0.580056	0.522283	0.520047	0.548391	0.453219	0.551875	0.605382	1	1.02625	0.995299	0.970727	1.00589	0.993605	0.830637	0.77004	0.629095	0.623434	0.567884	0.530782	0.525794	0.46342	0.535707	0.558862		-0.106264	0.521016	0.966388		-0.100612	0.508264	0.982591	Yes	Yes
O95503	CBX6		2																	1	1.04681	1.03671	1.14915	1.01534	0.794136	0.599083	0.419039	0.268455	0.19864	0.0905902	0.0659583	0.0533897	0.0530808	0.0461157	0.0737083					9.36319	-0.187942	0.0119587	0.987743		Yes		Yes
O95544-2	NADK		7																	1	1.05553	0.977979	1.06971	0.981138	0.935566	0.892383	0.842517	0.698952	0.655276	0.535292	0.528406	0.548879	0.534331	0.520838	0.4219					17.5798	-0.0761601	0.422897	0.975131		Yes
O95544	NADK	9		1	0.979589	1.02719	0.990823	0.972101	0.90859	0.844803	0.76942	0.696745	0.649317	0.650812	0.624585	0.668915	0.576166	0.579889	0.48976																		-0.052861	0.436031	0.976369					Yes
O95551-2	TDP2	4	4	1	0.94924	0.904708	0.906509	0.986763	0.885613	0.777392	0.706448	0.629418	0.549518	0.519854	0.488082	0.480031	0.392194	0.355184	0.220903	1	0.938686	0.929467	0.954137	1.01839	0.913714	0.852182	0.754147	0.68018	0.560359	0.533352	0.475999	0.446953	0.453571	0.362881	0.208168	13.9251	-0.0684699	0	0.965247	14.3705	-0.0697342	0	0.972693	Yes	Yes	Yes	Yes
O95562	SFT2D2	1		1	1.06076	1.01178	1.08772	1.00642	0.950812	0.892107	0.926168	0.872978	0.860366	0.866329	0.900898	0.965383	0.84572	1.08541	1.35558																		-0.0665028	0.956464	0.0594988					Yes
O95563	MPC2	6	5	1	1.03389	1.03248	0.997563	0.977524	0.874126	0.690186	0.438824	0.309425	0.215835	0.160342	0.12943	0.102704	0.079564	0.0813298	0.084888	1	1.00712	0.933602	0.90028	0.922249	0.794449	0.64377	0.461459	0.311483	0.199253	0.175436	0.125075	0.0900588	0.0760111	0.0635691	0.0709914	9.73627	-0.185276	0.0543532	0.998728	9.56531	-0.156296	0	0.992962	Yes	Yes	Yes	Yes
O95568	METTL18	6	4	1	1.02402	1.02918	1.05344	1.02721	0.996965	0.855546	0.718401	0.547826	0.407859	0.280152	0.19945	0.126814	0.0973168	0.0942044	0.0686499	1	1.11567	1.02199	0.961504	1.00637	0.944791	0.813425	0.651967	0.511785	0.394511	0.289128	0.212764	0.133622	0.0820554	0.0538347	0.0604035	11.5874	-0.145835	0	0.996719	11.2655	-0.140607	0	0.991126	Yes	Yes	Yes	Yes
O95571	ETHE1	19	19	1	0.979704	1.0292	1.00416	0.98747	0.918949	0.843643	0.8066	0.691271	0.63117	0.607588	0.592436	0.614618	0.54186	0.656672	0.8116	1	1.01366	1.017	1.0233	0.955989	0.942289	0.882847	0.773349	0.672173	0.628787	0.585595	0.56009	0.595103	0.560199	0.666117	0.724718		-0.0925945	0.629856	0.884972		-0.113727	0.611348	0.943767	Yes	Yes
O95573	ACSL3	50	27	1	0.981567	0.953387	0.95829	0.901851	0.775563	0.626116	0.416139	0.285487	0.200676	0.149785	0.121208	0.10258	0.0925627	0.0856652	0.0715804	1	0.956413	0.967304	0.974841	0.907109	0.779833	0.6072	0.424636	0.299664	0.206765	0.160741	0.122691	0.0922509	0.0909172	0.0828628	0.0716481	9.35146	-0.159703	0.0109734	0.997051	9.3734	-0.156494	0.00395474	0.997952	Yes	Yes	Yes	Yes
O95602	POLR1A	46	42	1	1.01281	1.01993	0.999921	0.968665	0.847077	0.65242	0.419413	0.283907	0.191993	0.143491	0.115768	0.0992936	0.0860888	0.103674	0.108752	1	1.02408	1.01239	0.981565	0.945925	0.831091	0.624814	0.415755	0.280595	0.188874	0.13364	0.104398	0.089855	0.0742025	0.0957307	0.11045	9.5057	-0.194374	0.068873	0.999128	9.41038	-0.187597	0.0536886	0.998415	Yes	Yes	Yes	Yes
O95613	PCNT	13	17	1	1.01596	0.963985	0.969556	0.938401	0.83681	0.699423	0.585649	0.462541	0.38953	0.323849	0.281728	0.25107	0.205283	0.180717	0.126695	1	1.02461	1.023	1.01924	1.00939	0.866939	0.755961	0.661944	0.506876	0.411676	0.338299	0.287756	0.2578	0.233666	0.227996	0.176906	10.8956	-0.10565	0	0.998377	11.3597	-0.112708	0.0987188	0.996761	Yes	Yes	Yes	Yes
O95619	YEATS4	9	7	1	1.0107	0.946347	0.953224	0.931252	0.867012	0.751121	0.655866	0.578696	0.554481	0.526455	0.516697	0.527649	0.458249	0.453535	0.245039	1	0.883221	0.929079	0.926728	0.880131	0.818936	0.748318	0.628634	0.514035	0.435659	0.430554	0.378608	0.432247	0.381309	0.467114	0.295018	14.5428	-0.0618693	0	0.962689	12.1572	-0.087205	0.246552	0.950861	Yes	Yes	Yes	Yes
O95625	ZBTB11	5	2	1	0.972371	0.960471	0.908326	0.870708	0.713505	0.513632	0.301633	0.219872	0.145659	0.112762	0.09695	0.0892685	0.0963718	0.0876326	0.0599738	1	1.02059	0.964739	1.13079	0.96413	0.744823	0.498324	0.330272	0.215423	0.140816	0.143861	0.0772766	0.0721149	0.0716312	0.0592056	0.134054	8.63243	-0.181162	0.0269381	0.994851	8.77267	-0.215163	0.0658745	0.989753	Yes	Yes	Yes	Yes
O95628-10	CNOT4	9		1	0.974667	1.07468	1.03439	1.01943	0.983839	0.877125	0.770779	0.636171	0.582051	0.533046	0.495958	0.493179	0.448957	0.593158	0.715																		-0.136087	0.543539	0.926173					Yes
O95628-9	CNOT4		12																	1	0.995309	1.00086	1.03884	1.02942	0.960426	0.870565	0.74435	0.619387	0.53009	0.425006	0.378102	0.405201	0.399357	0.530794	0.580028					12.8989	-0.146159	0.4484	0.955646		Yes
O95630	STAMBP	22	20	1	0.963749	0.9671	0.96904	0.968357	0.921962	0.84216	0.808142	0.697794	0.681836	0.659483	0.644772	0.701242	0.60356	0.735138	0.847173	1	0.932293	0.910365	1.00521	0.869582	0.848442	0.798642	0.7568	0.631439	0.604847	0.538934	0.512184	0.540303	0.492589	0.591192	0.654291		-0.0857889	0.692215	0.839764		-0.074018	0.507508	0.900258	Yes	Yes
O95639	CPSF4	5		1	1.00731	1.14129	1.0411	0.889833	0.774324	0.713873	0.446421	0.327362	0.236357	0.193961	0.164341	0.153256	0.132644	0.102192	0.109398																	9.70498	-0.150022	0.0440768	0.985034					Yes		Yes
O95644	NFATC1	3	2	1	1.01472	1.06207	1.01736	0.906697	0.879184	0.704419	0.595586	0.490563	0.445359	0.39578	0.37927	0.310549	0.335237	0.368224	0.501738	1	1.02242	0.923543	0.981639	1.04094	0.898684	0.669406	0.493081	0.42894	0.423566	0.328507	0.337714	0.315715	0.342344	0.353812	0.283305	11.0073	-0.132167	0.356758	0.971009	10.0622	-0.177675	0.32237	0.987952	Yes	Yes
O95671	ASMTL	13	15	1	0.95655	0.925342	0.948107	0.910888	0.806535	0.628317	0.404893	0.26877	0.16005	0.0998553	0.0634832	0.0557737	0.0419702	0.050562	0.0375284	1	1.00045	0.945243	0.948477	0.895831	0.817549	0.652637	0.435739	0.302463	0.200306	0.129161	0.101149	0.0707415	0.0523765	0.0532324	0.0453078	9.33677	-0.184117	0	0.994215	9.53075	-0.169042	0	0.995758	Yes	Yes	Yes	Yes
O95674	CDS2	3	3	1	0.978255	1.02854	0.923438	0.91434	0.801402	0.668211	0.449545	0.341222	0.207384	0.167986	0.141582	0.115092	0.0810287	0.0806051	0.0739843	1	1.02441	1.03452	0.92279	0.938449	0.845607	0.686085	0.535998	0.381026	0.286422	0.220472	0.200625	0.137747	0.0869566	0.104523	0.0807827	9.66003	-0.151744	0	0.995543	10.1702	-0.136947	0	0.995924	Yes	Yes	Yes	Yes
O95684	FGFR1OP	2	5	1	1.12279	1.06885	1.0634	0.980045	0.995801	0.90568	0.774055	0.738326	0.70978	0.61274	0.622832	0.465908	0.438737	0.434613	0.297333	1	1.02868	0.929382	0.925593	0.916933	0.853407	0.817269	0.732039	0.618046	0.504361	0.433513	0.382839	0.375045	0.331857	0.274071	0.166871	16.11	-0.0620401	0	0.961976	12.7829	-0.0826218	0	0.983227	Yes	Yes	Yes	Yes
O95685	PPP1R3D	2	2	1	1.04685	1.02445	0.973019	1.00691	1.00164	0.85358	0.695449	0.569596	0.51163	0.440054	0.331442	0.268246	0.244539	0.166919	0.0733533	1	0.966774	1.26987	1.25667	0.982773	0.777291	0.905909	0.671072	0.422836	0.311761	0.272242	0.211766	0.183401	0.112996	0.0759687	0.0804682	12.3779	-0.105493	0	0.98994	11.0346	-0.140889	0.0122674	0.934907	Yes	Yes	Yes	Yes
O95707	POP4	7	6	1	1.00636	1.02085	1.01502	1.00215	0.91604	0.759332	0.619059	0.570168	0.537618	0.500206	0.509751	0.490534	0.420218	0.462602	0.437425	1	1.00272	1.08032	0.9404	0.920843	0.921373	0.782819	0.615139	0.535575	0.500874	0.465854	0.408871	0.422088	0.406442	0.446094	0.450519	13.3697	-0.115561	0.446783	0.99321	12.094	-0.125379	0.410418	0.981959	Yes	Yes
O95714	HERC2	38	39	1	0.996595	0.971341	0.943406	0.862406	0.706373	0.486377	0.250831	0.159172	0.106164	0.0814288	0.070891	0.0641319	0.0543803	0.0569093	0.0566642	1	1.00474	1.00479	0.976736	0.851895	0.689975	0.4861	0.296183	0.200376	0.133855	0.106662	0.0831281	0.073998	0.0620644	0.0694534	0.0726219	8.45212	-0.207376	0.0191861	0.996642	8.50164	-0.186489	0.0184686	0.998685	Yes	Yes	Yes	Yes
O95716	RAB3D	8	1	1	1.03935	1.0166	1.02518	1.02541	0.990005	0.872944	0.881086	0.741729	0.74014	0.684342	0.70816	0.712904	0.656099	0.802782	1.05101	1	1.17091	1.17784	0.971653	0.971878	0.910697	0.929723	0.822999	0.734622	0.646104	0.671346	0.539524	0.552645	0.520791	0.632386	0.789311		-0.0870793	0.764485	0.640496		-0.0989714	0.60832	0.8209	Yes	Yes
O95718	ESRRB	1		1	1.01321	0.960637	0.985294	0.904569	0.849404	0.617913	0.387674	0.230446	0.153311	0.0829131	0.0573637	0.0448569	0.0337653	0.02518	0.0337881																	9.31348	-0.200335	0	0.99755					Yes		Yes
O95721	SNAP29	12	8	1	0.996789	1.02413	1.00574	0.985856	0.928288	0.850276	0.76069	0.666859	0.606158	0.533854	0.490574	0.498131	0.43837	0.466569	0.427003	1	1.00827	0.971321	1.01966	1.01457	0.970193	0.859682	0.755193	0.609042	0.524132	0.437827	0.387065	0.360636	0.337979	0.349375	0.270374	15.3007	-0.0796366	0.369541	0.997043	12.7311	-0.107159	0.251368	0.996849	Yes	Yes		Yes
O95747	OXSR1	18	14	1	1.01611	0.986803	1.00165	0.981335	0.850487	0.694062	0.497039	0.328673	0.230767	0.165297	0.130148	0.0880677	0.0837225	0.0666709	0.0746696	1	1.01313	1.04821	1.19928	1.00847	0.894017	0.726113	0.560937	0.464637	0.307782	0.255515	0.202737	0.141767	0.130356	0.111681	0.111068	9.90989	-0.166667	0.0195419	0.999282	10.5973	-0.1405	0.0392653	0.980493	Yes	Yes	Yes	Yes
O95749	GGPS1	8	5	1	0.994347	0.993505	1.06955	1.0477	0.972764	0.883925	0.794815	0.638667	0.47519	0.346427	0.245226	0.18775	0.150125	0.113226	0.0839561	1	1.03352	1.05841	1.04725	1.06072	0.986619	0.918565	0.787342	0.652819	0.507771	0.382047	0.24966	0.156224	0.107096	0.0831767	0.0674428	12.2569	-0.132777	0	0.996067	12.3784	-0.140875	0	0.993578	Yes	Yes	Yes	Yes
O95755	RAB36		3																	1	0.955056	1.07592	1.03007	0.984191	0.959348	0.843146	0.626203	0.450136	0.321011	0.268026	0.243974	0.166914	0.158864	0.135166	0.1619					10.8923	-0.164597	0.125206	0.994628		Yes		Yes
O95757	HSPA4L	51	39	1	0.994828	0.998617	0.990841	1.00129	0.949928	0.833899	0.682802	0.513443	0.370326	0.263337	0.180891	0.117233	0.0937465	0.0717043	0.0644285	1	1.01536	0.994073	1.02084	0.998847	0.936421	0.838163	0.707182	0.540596	0.397705	0.301024	0.21598	0.142143	0.0970471	0.0674708	0.0564985	11.2851	-0.147694	0	0.99933	11.5078	-0.140656	0	0.998235	Yes	Yes	Yes	Yes
O95758-4	PTBP3	23	23	1	0.959929	0.926205	0.925515	0.940508	0.851805	0.736285	0.614032	0.493848	0.351088	0.238297	0.142368	0.0983096	0.0768658	0.086318	0.0857364	1	1.00476	0.976768	0.96924	0.95906	0.899518	0.777585	0.605408	0.508464	0.389176	0.266778	0.176246	0.125679	0.0793193	0.0863703	0.0886509	10.7077	-0.139267	0	0.987043	10.9823	-0.136202	0	0.995338	Yes	Yes	Yes	Yes
O95759	TBC1D8	6	7	1	0.980023	0.896442	0.917156	0.901695	0.769812	0.591842	0.389143	0.255121	0.182825	0.130658	0.0974439	0.0995507	0.0782308	0.095361	0.0651026	1	0.942796	0.998402	0.947706	0.918619	0.721896	0.574734	0.430892	0.295311	0.207793	0.16777	0.121884	0.118327	0.0968883	0.101097	0.108036	9.14793	-0.169045	0.016425	0.991108	9.18646	-0.153255	0.0216739	0.996112	Yes	Yes	Yes	Yes
O95772	STARD3NL	3	2	1	1.04382	1.09353	1.15761	1.07832	0.967475	0.823145	0.651487	0.474716	0.400442	0.373993	0.259351	0.26985	0.251115	0.191306	0.178404	1	0.905732	0.961351	0.986135	0.875653	0.74312	0.743236	0.628538	0.5631	0.445967	0.422163	0.332103	0.278315	0.231856	0.136332	0.0560642	11.2924	-0.139125	0.172477	0.976186	11.3532	-0.0974944	0	0.964832	Yes	Yes	Yes	Yes
O95777	NAA38	8	9	1	0.978816	1.00058	0.976428	0.9953	0.970009	0.876595	0.805063	0.741236	0.730598	0.752304	0.774078	0.772119	0.695685	0.855577	0.993291	1	1.04493	0.979134	0.978326	1.0309	0.957229	0.881296	0.802589	0.730235	0.69451	0.63608	0.585117	0.655576	0.651962	0.853718	0.783762		-0.115883	0.789759	0.682314		-0.101916	0.694071	0.841437	Yes	Yes
O95782	AP2A1	59	67	1	1.00439	1.01247	0.999847	1.00269	0.944134	0.83107	0.65479	0.507294	0.334201	0.197075	0.126117	0.0821665	0.072461	0.0635143	0.0633482	1	1.0296	1.00148	1.01106	0.985015	0.926327	0.795988	0.64064	0.500946	0.350073	0.22347	0.145183	0.0897865	0.0690807	0.0625152	0.0656441	11.0463	-0.16328	0	0.998162	10.9845	-0.15329	0	0.997282	Yes	Yes	Yes	Yes
O95785	WIZ		16																	1	1.01821	1.0063	1.03004	0.992581	0.888478	0.768709	0.581004	0.465057	0.376483	0.293396	0.28032	0.259437	0.200857	0.219013	0.185961					10.8457	-0.132916	0.151488	0.998052		Yes		Yes
O95786	DDX58	13	12	1	0.970089	0.973668	0.966371	0.887998	0.773487	0.62173	0.416074	0.289541	0.186984	0.138378	0.107434	0.0753646	0.0649814	0.0740002	0.0782176	1	1.03438	0.945291	0.969733	0.915565	0.818036	0.669851	0.509424	0.415318	0.311301	0.25663	0.230537	0.193074	0.172265	0.198518	0.215105	9.31739	-0.162236	0	0.996701	10.0573	-0.134835	0.119726	0.994503	Yes	Yes	Yes	Yes
O95789	ZMYM6		1																	1	1.0693	0.924953	0.857178	0.866068	0.717252	0.517165	0.33529	0.271849	0.136894	0.109142	0.0620538	0.0697781	0.0380884	0.0505532	0.0246306					8.72202	-0.175027	0	0.986617		Yes		Yes
O95793-3	STAU1	1	1	1	1.01459	0.938975	0.901514	0.802553	0.763154	0.504538	0.346226	0.2301	0.185634	0.146321	0.139383	0.1302	0.097428	0.101894	0.0766609	1	0.858603	0.975555	1.03391	0.958275	0.89819	0.617806	0.386461	0.301391	0.194952	0.175704	0.0815498	0.113855	0	0.11143	0.0684101	8.73032	-0.156209	0.0122933	0.989814	9.49221	-0.193416	0.0467808	0.984847	Yes	Yes	Yes	Yes
O95793	STAU1	21	25	1	0.958755	0.910803	0.919519	0.844243	0.689231	0.49952	0.302506	0.215848	0.157194	0.120106	0.104225	0.0973976	0.0741055	0.0650319	0.0629248	1	0.949057	0.95187	0.907593	0.858511	0.716998	0.517474	0.31496	0.216307	0.158532	0.117211	0.0936735	0.0861559	0.0806494	0.0775114	0.0660368	8.5369	-0.169157	0.00186081	0.992973	8.66201	-0.173836	0.0115759	0.993814	Yes	Yes	Yes	Yes
O95801	TTC4	16	9	1	0.991873	1.01229	0.979613	0.962256	0.916021	0.764405	0.581016	0.4197	0.254053	0.163021	0.11475	0.0748212	0.0701906	0.0728301	0.0699775	1	0.99731	0.958744	1.03133	0.932834	0.874791	0.723539	0.569324	0.376708	0.250021	0.169374	0.1091	0.0620263	0.0510939	0.0377706	0.0430992	10.4576	-0.167139	0.0053149	0.998235	10.2276	-0.166743	0	0.996253	Yes	Yes	Yes	Yes
O95803	NDST3	2		1	1.05573	0.786699	1.01524	0.854732	0.735496	0.738721	0.653367	0.465472	0.451023	0.446999	0.492165	0.607877	0.366794	0.3891	0.711541																	15.324	-0.108841	0.469976	0.782812					Yes
O95816	BAG2	26	22	1	1.00007	1.00217	0.973333	1.01436	0.960717	0.864208	0.788992	0.684379	0.658993	0.656012	0.66346	0.770903	0.680893	0.850138	0.911856	1	1.01637	0.93273	0.979756	0.960452	0.937405	0.786969	0.720004	0.613256	0.588947	0.523463	0.527344	0.622742	0.659369	0.829232	0.844979		-0.127633	0.73672	0.762001		-0.150394	0.653678	0.7506	Yes	Yes
O95817	BAG3	48	38	1	0.990318	1.00442	1.00761	0.979278	0.951452	0.868478	0.860456	0.76763	0.752468	0.732521	0.769772	0.831705	0.732584	0.925915	1.22815	1	0.962357	0.991575	1.02223	0.978009	0.978295	0.866361	0.793077	0.690633	0.630819	0.579201	0.565437	0.584286	0.593322	0.75041	0.842758		-0.0919034	0.844562	0.279656		-0.120232	0.649698	0.838128	Yes	Yes
O95819	MAP4K4	14		1	0.993998	0.94817	0.965542	0.841353	0.695998	0.53219	0.321974	0.226249	0.152581	0.115367	0.0978621	0.0960019	0.0771234	0.0861194	0.095714																	8.6462	-0.173142	0.0219704	0.995715					Yes		Yes
O95822	MLYCD	6	8	1	0.978793	1.00002	0.995966	0.964813	0.907457	0.862845	0.722415	0.639069	0.500669	0.452747	0.344698	0.213258	0.161373	0.0897183	0.088103	1	1.08761	1.15221	1.04549	1.10523	1.04523	0.872086	0.760362	0.581104	0.52574	0.472863	0.394156	0.30212	0.216078	0.166772	0.0957265	12.3852	-0.114147	0	0.98887	12.8021	-0.104493	0	0.967777	Yes	Yes	Yes	Yes
O95825	CRYZL1	19	11	1	1.01688	1.0679	0.992248	0.98854	0.988385	0.866318	0.82835	0.727229	0.712562	0.700384	0.714959	0.731761	0.66012	0.834331	0.952265	1	0.99689	1.03271	0.990447	0.952953	0.936281	0.847671	0.684425	0.641765	0.561276	0.493265	0.475196	0.49209	0.485614	0.571008	0.563688		-0.108399	0.756672	0.759865		-0.1199	0.505272	0.976897	Yes	Yes
O95831	AIFM1	44	42	1	0.983144	0.994953	0.967242	0.958561	0.896454	0.749405	0.626353	0.502005	0.425919	0.377784	0.345747	0.345818	0.298	0.350823	0.389513	1	0.969866	0.944726	0.988616	0.947915	0.86827	0.728508	0.596128	0.48684	0.406826	0.338469	0.307513	0.310432	0.287495	0.336359	0.342049	11.1775	-0.130685	0.312246	0.992631	10.8576	-0.130613	0.27379	0.991458	Yes	Yes		Yes
O95833	CLIC3	9	8	1	0.963856	1.0216	0.977216	0.969885	0.944134	0.822943	0.761778	0.698626	0.628493	0.593687	0.566446	0.4913	0.404578	0.225669	0.106888	1	1.05692	1.03751	1.01044	1.00973	0.973747	0.903343	0.748228	0.620306	0.593277	0.506694	0.511601	0.45567	0.345204	0.209186	0.105033	14.4387	-0.0763011	0	0.948716	13.7382	-0.0843732	0	0.968829	Yes	Yes	Yes	Yes
O95834-3	EML2	24	19	1	1.03823	1.02138	1.00672	1.00463	0.965263	0.892543	0.810111	0.678254	0.495011	0.31559	0.152173	0.0707064	0.065918	0.0526731	0.0549777	1	1.0167	1.05609	1.00773	0.998707	0.977272	0.889741	0.758796	0.667949	0.531369	0.365268	0.227094	0.0987516	0.0589359	0.0475607	0.0482527	12.1936	-0.171236	0	0.99382	12.2776	-0.151904	0	0.990067	Yes	Yes	Yes	Yes
O95835	LATS1	8	5	1	0.983752	1.00058	0.966187	0.869445	0.78723	0.617551	0.447507	0.317097	0.252471	0.219514	0.208699	0.206293	0.186969	0.218462	0.275931	1	1.06521	0.977081	0.963999	0.944017	0.826556	0.621475	0.453541	0.327211	0.239063	0.194758	0.175216	0.146636	0.136532	0.159167	0.186445	9.35044	-0.164233	0.176428	0.990185	9.53191	-0.171683	0.120009	0.995355	Yes	Yes	Yes	Yes
O95848	NUDT14	4	1	1	1.03248	1.05536	1.16684	1.05379	0.99636	0.973364	0.849483	0.712022	0.655536	0.63003	0.661238	0.614247	0.503413	0.398176	0.139272	1	0.908423	1.19903	1.03473	1.24572	1.0911	0.873001	0.846569	0.742185	0.659115	0.621687	0.582603	0.578314	0.564831	0.61663	0.374105	16.2119	-0.0669879	0	0.909574		-0.0751465	0.471782	0.840807	Yes	Yes	Yes
O95857	TSPAN13	1	1	1	0.832211	0.845586	0.713188	0.555405	0.8505	0.965085	0.635131	0.633386	0.709131	0.498548	0.679247	0.537173	0.686461	0.723068	0.832765	1	1.27861	1.38427	0.981478	1.33223	0.962593	1.17887	1.00767	1.07587	0.765376	0.610176	0.4699	0.700486	0.539283	0.823892	1.00833			0.486668	0.341083		0	0.692011	0.501565	Yes	Yes
O95858	TSPAN15	3	1	1	1.07222	1.05851	1.09444	1.02302	1.02943	0.900848	0.846927	0.732117	0.75093	0.760905	0.666814	0.68323	0.634007	0.751942	0.890386	1	0.919492	0.974208	0.968678	0.998483	1.0644	0.855469	0.7384	0.718517	0.564121	0.526493	0.527053	0.529078	0.460649	0.559879	0.545796		-0.0964218	0.730047	0.831831		-0.113117	0.510409	0.956906	Yes	Yes
O95861	BPNT1	29	28	1	0.999082	0.998682	1.02132	1.02329	0.993154	0.88974	0.842419	0.747245	0.668342	0.618709	0.55532	0.490005	0.397631	0.253176	0.0755182	1	0.982299	0.975354	0.994958	0.968685	0.943579	0.866377	0.783858	0.693018	0.62115	0.55013	0.481075	0.469715	0.385859	0.255652	0.0680763	14.8816	-0.0849417	0	0.966197	14.117	-0.0823241	0	0.966912	Yes	Yes	Yes	Yes
O95863	SNAI1		1																	1	1.09444	1.07802	1.14864	0.952974	0.826837	0.687278	0.57999	0.415695	0.270638	0.298294	0.188003	0.151323	0.162673	0.215104	0.16134					10.2771	-0.140198	0.100897	0.976823		Yes		Yes
O95864	FADS2		1																	1	0.87368	1.00723	1.07872	1.12707	1.04671	2.1977	1.55096	1.26547	0.835818	0.773374	1.26404	0.468693	0.51587	0.538362	0.50224						-0.83039	0.502994	0.326719		Yes
O95865	DDAH2	9	5	1	0.946536	0.946118	0.956945	0.934594	0.914071	0.838623	0.820162	0.712072	0.673002	0.605566	0.528205	0.452996	0.372225	0.196487	0.0698074	1	1.04189	1.06042	0.979592	1.04071	1.00922	0.932375	0.840522	0.737028	0.656833	0.563781	0.52564	0.440821	0.353473	0.162025	0.0299644	14.398	-0.0855762	0	0.944991	14.3395	-0.0976358	0	0.966014	Yes	Yes	Yes	Yes
O95870	ABHD16A	5	7	1	1.01376	0.994566	0.95229	0.900319	0.744055	0.584083	0.365175	0.250231	0.178675	0.134994	0.121338	0.114315	0.0948561	0.0936473	0.0844264	1	0.967724	0.94456	0.970493	0.844624	0.704755	0.54758	0.366805	0.250647	0.178099	0.151561	0.125252	0.0999948	0.0842352	0.108888	0.123165	9.02553	-0.172904	0.0394195	0.997881	8.80855	-0.162119	0.0320054	0.994802	Yes	Yes	Yes	Yes
O95873	C6orf47	3	3	1	1.03521	1.01523	1.02384	1.0164	0.953279	0.774943	0.76535	0.61383	0.520817	0.502731	0.439753	0.445458	0.404311	0.444821	0.486309	1	1.00045	1.05147	1.02372	0.921943	0.896767	0.792766	0.653875	0.540291	0.428117	0.36884	0.341918	0.288519	0.295492	0.347299	0.249397	13.5857	-0.10573	0.41197	0.983274	11.6031	-0.112548	0.215174	0.991511	Yes	Yes		Yes
O95881	TXNDC12	27	23	1	0.994727	1.02019	1.01196	0.99008	0.906715	0.83901	0.808222	0.73649	0.693846	0.69387	0.719622	0.806766	0.698779	0.851811	1.01307	1	1.01772	1.05111	1.04934	0.978363	0.928899	0.930107	0.890016	0.75935	0.70025	0.728372	0.678508	0.68451	0.656207	0.816235	0.946847		-0.0960044	0.779772	0.644923		-0.100331	0.742843	0.745291	Yes	Yes
O95897	OLFM2		3																	1	1.01032	1.06748	1.01045	0.93437	0.890645	0.916755	0.887276	0.800589	0.663812	0.736974	0.712918	0.639086	0.556083	0.698336	0.989129						-0.0653326	0.708233	0.64171		Yes
O95900	TRUB2	6	5	1	0.974118	1.02281	0.979076	0.922707	0.840674	0.638384	0.410103	0.297094	0.206232	0.151165	0.106742	0.107366	0.0838549	0.0745329	0.0952233	1	1.04134	1.0784	1.04143	0.939557	0.860963	0.69742	0.465658	0.296896	0.210901	0.142242	0.0790661	0.0729983	0.0425613	0.0311697	0.0505442	9.48534	-0.177498	0.0430148	0.998104	9.78596	-0.178874	0	0.995413	Yes	Yes	Yes	Yes
O95905-3	ECD	10	9	1	0.962284	0.977643	0.96441	0.891383	0.795544	0.643147	0.416038	0.28805	0.181682	0.128017	0.0969592	0.0841414	0.0704072	0.0581617	0.0554847	1	0.939105	0.9769	0.957497	0.867255	0.848788	0.640723	0.444199	0.364955	0.253488	0.185817	0.158069	0.127014	0.117871	0.133428	0.105085	9.4033	-0.167774	0	0.996533	9.70219	-0.147102	0.0357874	0.992802	Yes	Yes	Yes	Yes
O95926	SYF2	1	3	1	0.97637	0.95354	0.993663	0.978973	0.985059	0.790405	0.676755	0.535995	0.403205	0.306142	0.24703	0.256562	0.20991	0.234726	0.132418	1	0.979297	1.01158	0.978866	0.99858	0.862764	0.790323	0.688749	0.504218	0.389837	0.314947	0.235631	0.224103	0.182789	0.193321	0.120687	11.4321	-0.130324	0.120101	0.993775	11.3531	-0.117718	0.0325627	0.996045	Yes	Yes	Yes	Yes
O95969	SCGB1D2	2		1	1.31481	1.04021	1.11677	1.23524	0.868282	0.879746	1.03835	0.954085	0.89827	0.612219	1.86559	1.06721	2.09976	1.34138	1.4471																		0.600484	1.5	0.486203					Yes
O95983	MBD3	7	6	1	0.987531	1.00404	0.941718	0.923706	0.794418	0.673569	0.52413	0.392859	0.281237	0.222652	0.151164	0.134761	0.110847	0.121701	0.102826	1	0.980637	0.983146	0.968409	0.926556	0.822215	0.690712	0.578011	0.366483	0.310527	0.215554	0.173569	0.119798	0.101484	0.113792	0.0594744	10.012	-0.133813	0	0.996948	10.2101	-0.137607	0	0.996294	Yes	Yes	Yes	Yes
O95985	TOP3B	13	11	1	1.0103	0.999458	0.9909	0.906937	0.790123	0.610659	0.386687	0.267316	0.186131	0.152038	0.125046	0.0980585	0.0839606	0.0885655	0.0770132	1	0.961126	0.955889	0.961514	0.857177	0.721742	0.537997	0.333451	0.220434	0.141427	0.0934216	0.0694031	0.04919	0.0375152	0.0357514	0.0343585	9.25205	-0.173755	0.0359083	0.998846	8.75529	-0.183881	0	0.996148	Yes	Yes	Yes	Yes
O95989	NUDT3	7	7	1	1.0319	0.908817	1.06843	1.03737	0.894021	0.916969	0.808162	0.726059	0.758589	0.692385	0.714522	0.8711	0.669825	0.750298	1.16972	1	1.02582	0.986423	0.966123	0.980687	0.924827	0.833836	0.773545	0.699286	0.603346	0.585439	0.555724	0.602605	0.553681	0.696434	0.755023		-0.077809	0.796384	0.399687		-0.0997309	0.618442	0.905985	Yes	Yes
O95994	AGR2	1		1	0.603481	0.605582	0.539319	0.732082	1.00174	0.743142	0.695404	0.337025	0.686606	0.344716	0.545864	0.166071	0.129324	0.188998	0.17458																	8.89335		0	0.354107					Yes
O95997	PTTG1	2		1	0.98619	1.02843	0.920222	0.966515	0.879891	0.745046	0.663086	0.57605	0.44374	0.385495	0.284257	0.267679	0.241319	0.278918	0.27694																	11.6558	-0.104165	0.136914	0.98799					Yes		Yes
O95999	BCL10	10	5	1	1.02843	1.02699	1.03063	0.962696	0.879545	0.803927	0.736624	0.629966	0.578812	0.570466	0.490186	0.49743	0.407438	0.403188	0.298587	1	0.978653	0.920484	0.871437	0.991517	0.893495	0.798967	0.780908	0.689888	0.587692	0.497744	0.511385	0.471722	0.421366	0.391084	0.238037	14.7454	-0.0631522	0	0.989129	14.5686	-0.0661191	0	0.961272	Yes	Yes	Yes	Yes
O96000	NDUFB10	18	14	1	0.960005	0.980058	0.995909	0.969227	0.842686	0.727342	0.526215	0.39006	0.266975	0.194127	0.133704	0.10498	0.0948781	0.0840579	0.0853876	1	0.972451	0.994318	0.9571	0.985378	0.84731	0.727326	0.582991	0.418917	0.295381	0.239272	0.17203	0.123271	0.0854234	0.090043	0.0778856	10.1891	-0.150311	0.0048653	0.997885	10.4599	-0.140555	0	0.997353	Yes	Yes	Yes	Yes
O96005	CLPTM1	23	20	1	1.00579	1.00057	1.0239	0.977084	0.953124	0.813986	0.598376	0.452908	0.316642	0.241959	0.192332	0.135817	0.11435	0.0912793	0.0808383	1	0.946909	0.990357	0.973784	0.91792	0.840211	0.712114	0.524917	0.401224	0.301796	0.2218	0.167339	0.119264	0.0892197	0.0722385	0.0476138	10.8393	-0.152424	0.0359537	0.999079	10.2119	-0.141832	0	0.996449	Yes	Yes	Yes	Yes
O96006	ZBED1	3	3	1	0.997127	1.03202	0.994224	0.934284	0.879881	0.734286	0.564486	0.391514	0.264435	0.177718	0.103455	0.0665751	0.0715906	0.0668696	0.0484792	1	1.09816	1.07341	1.18162	1.07158	1.0259	0.829849	0.647074	0.507831	0.361372	0.28756	0.19949	0.160263	0.154159	0.161874	0.130685	10.2883	-0.161816	0	0.997403	11.1695	-0.157331	0.103624	0.975938	Yes	Yes	Yes	Yes
O96007	MOCS2	3	4	1	0.981784	0.925918	0.957713	0.918373	0.897646	0.809516	0.832396	0.732957	0.69501	0.720848	0.718546	0.738079	0.659294	0.792143	0.926985	1	0.976924	1.00493	1.16528	0.986093	0.986492	0.816391	0.824164	0.638177	0.582274	0.465562	0.450144	0.48675	0.478531	0.508039	0.50657		-0.0633188	0.746383	0.679858	15.0322	-0.111863	0.461026	0.950325	Yes	Yes
O96008	TOMM40	35	18	1	1.04049	1.03883	1.03035	1.01772	0.95997	0.830166	0.73471	0.588224	0.529182	0.478957	0.452517	0.425706	0.353997	0.35621	0.313891	1	1.01376	1.03438	1.02694	1.03628	0.955028	0.835974	0.681996	0.596146	0.495826	0.407085	0.373392	0.397488	0.358702	0.341693	0.254309	13.0872	-0.0956307	0.278404	0.992313	12.3449	-0.109297	0.264629	0.991883	Yes	Yes	Yes	Yes
O96011	PEX11B	5	5	1	0.937524	0.94634	0.869399	0.845187	0.70064	0.568327	0.322085	0.207736	0.119801	0.0911268	0.0727781	0.0608208	0.0681196	0.0573968	0.0302815	1	1.01591	1.01207	0.89902	0.903866	0.820826	0.596579	0.400172	0.26979	0.173918	0.103451	0.0909546	0.066431	0.0585771	0.066896	0.0670588	8.68681	-0.179004	0	0.9863	9.28233	-0.177349	0.00652899	0.994451	Yes	Yes	Yes	Yes
O96013	PAK4	13	13	1	1.01772	1.04795	0.979457	0.988856	0.946461	0.737173	0.535109	0.356979	0.225118	0.190271	0.163813	0.153614	0.131772	0.147529	0.112531	1	1.0332	0.962231	1.00834	0.942572	0.887439	0.725345	0.560724	0.349077	0.195862	0.126044	0.0957055	0.0662186	0.0543588	0.0650914	0.063116	10.1318	-0.192603	0.111112	0.997941	10.1147	-0.178885	0.00469779	0.996346	Yes	Yes	Yes	Yes
O96015	DNAL4	1	1	1	1.0266	1.01631	1.008	0.851115	0.722699	0.590176	0.381756	0.306635	0.210578	0.180216	0.138893	0.0943673	0.105256	0.0677364	0.0574049	1	0.927393	0.859196	0.984349	0.78075	0.677084	0.569354	0.539469	0.291606	0.222993	0.209462	0.0930487	0.116528	0.0748718	0.0505811	0	9.11955	-0.150113	0	0.996959	9.09716	-0.144316	0	0.966262	Yes	Yes	Yes	Yes
O96017-9	CHEK2	13	13	1	0.982348	0.982571	0.954117	0.939741	0.842036	0.666702	0.458922	0.323507	0.21931	0.164695	0.120899	0.101007	0.0933835	0.0867816	0.0629505	1	1.01204	1.0335	1.05953	0.965816	0.865662	0.688787	0.484878	0.340239	0.229537	0.16282	0.134049	0.0988788	0.0780053	0.0776271	0.0657549	9.72501	-0.16389	0.0205034	0.998573	9.90538	-0.16717	0.0228394	0.997837	Yes	Yes	Yes	Yes
O96018	APBA3	6	3	1	0.951242	0.966268	0.945255	0.910074	0.740289	0.614144	0.439001	0.308004	0.20507	0.149096	0.115683	0.105123	0.08647	0.0846532	0.0514635	1	1.04078	1.04991	1.13952	0.969764	0.994178	0.765968	0.756879	0.529761	0.348083	0.347195	0.30649	0.253706	0.175957	0.259182	0.340551	9.33595	-0.153846	0	0.99598	11.3595	-0.151636	0.229928	0.967777	Yes	Yes	Yes	Yes
O96019	ACTL6A	21	21	1	0.980904	0.973601	0.964208	0.954691	0.865796	0.735845	0.640544	0.569031	0.528483	0.535501	0.497221	0.477784	0.414439	0.382868	0.145711	1	1.03633	0.999354	0.938981	0.930445	0.845431	0.746384	0.610433	0.548535	0.466815	0.41607	0.37456	0.416773	0.391654	0.348759	0.122342	13.469	-0.069397	0	0.956577	12.2629	-0.0795999	0	0.972177	Yes	Yes	Yes	Yes
O96020	CCNE2	3	2	1	1.01273	1.02253	1.02564	1.0237	0.913059	0.729572	0.520736	0.359792	0.241877	0.17516	0.155429	0.0908319	0.0762086	0.0630348	0.0380018	1	0.995572	1.07139	0.971156	1.11332	0.89672	0.758312	0.556951	0.355241	0.26022	0.176875	0.106367	0.130171	0.0968488	0.0540217	0.0281316	10.1899	-0.169305	0.015931	0.998305	10.3175	-0.172823	0.020213	0.990502	Yes	Yes	Yes	Yes
O96028	WHSC1	9	3	1	0.937947	0.990115	0.947366	0.862055	0.754962	0.617979	0.46447	0.348605	0.299302	0.248404	0.248932	0.229372	0.216318	0.239423	0.301428	1	0.985388	1.08845	0.995883	0.918659	0.76938	0.615295	0.490002	0.355569	0.266335	0.243359	0.186613	0.191578	0.156122	0.191038	0.208734	9.4422	-0.14374	0.189318	0.987577	9.59688	-0.14696	0.12369	0.992534	Yes	Yes	Yes	Yes
O96033	MOCS2	1		1	1.21196	1.15074	1.19466	1.18422	1.15434	0.946431	0.678372	0.572099	0.604282	0.550166	0.480151	0.496802	0.42887	0.475788	0.466292																	13.9468	-0.187847	0.492572	0.877816					Yes
P00156	MT-CYB	2	3	1	0.968841	1.13418	1.02664	1.00118	1.06038	0.877827	0.635692	0.492349	0.393128	0.286656	0.239313	0.168761	0.146821	0.113154	0.128832	1	1.01641	0.974037	0.887667	1.02581	0.907116	0.793408	0.740464	0.565524	0.477495	0.38476	0.362788	0.27955	0.219911	0.196249	0.117671	11.2773	-0.155055	0.0927444	0.985027	12.1988	-0.100732	0	0.986997	Yes	Yes	Yes	Yes
P00167	CYB5A	6	6	1	1.05038	1.08677	1.10317	1.07119	0.989086	0.903013	0.844889	0.738825	0.727079	0.700662	0.682081	0.671106	0.620095	0.756702	0.879872	1	0.977843	1.07042	1.08755	1.03647	1.00117	0.849506	0.857756	0.749309	0.701707	0.644346	0.609679	0.638936	0.624399	0.720642	0.805597		-0.0949077	0.71658	0.836462		-0.0860742	0.672239	0.882269	Yes	Yes
P00338-3	LDHA	104	131	1	1.0104	1.01822	0.995379	1.02258	0.966927	0.835515	0.879004	0.721449	0.690167	0.629397	0.51866	0.467092	0.384101	0.272717	0.141286	1	0.993758	0.991213	0.967151	1.0075	0.973285	0.872721	0.778249	0.694376	0.611259	0.499407	0.438665	0.408221	0.351747	0.251264	0.114169	14.8712	-0.0811569	0	0.974817	13.7848	-0.0865283	0	0.987837	Yes	Yes	Yes	Yes
P00367	GLUD1	90	81	1	0.982423	0.971403	0.999251	0.994462	0.930998	0.848619	0.801962	0.717892	0.674244	0.675979	0.673438	0.72456	0.635554	0.798295	0.968599	1	0.993125	0.963495	1.00348	0.998156	0.960472	0.868115	0.819099	0.722602	0.670957	0.668282	0.621306	0.663885	0.637539	0.797518	0.911319		-0.0975004	0.735144	0.71216		-0.100937	0.710467	0.781042	Yes	Yes
P00374	DHFR	13	10	1	0.952546	0.971489	0.934484	0.905042	0.816394	0.609387	0.382484	0.249048	0.163582	0.122214	0.0852859	0.0713849	0.0628309	0.0671201	0.0798105	1	1.00135	0.96359	0.956118	0.858566	0.791251	0.596548	0.406816	0.270611	0.170117	0.136695	0.101211	0.0722646	0.0627385	0.0523754	0.0522286	9.24198	-0.186887	0.0247025	0.995308	9.21833	-0.167662	0	0.995998	Yes	Yes	Yes	Yes
P00387-3	CYB5R3	41	33	1	0.965533	0.973213	0.981736	0.987187	0.9319	0.8542	0.777796	0.653898	0.537688	0.469696	0.377104	0.324924	0.248039	0.181624	0.117854	1	0.996977	0.982831	1.00461	0.983755	0.936592	0.877875	0.807088	0.687087	0.578769	0.491051	0.425468	0.354695	0.276469	0.186866	0.0746583	12.9612	-0.098378	0	0.994624	13.3922	-0.0979556	0	0.990074	Yes	Yes	Yes	Yes
P00390	GSR	44	44	1	0.984187	0.952021	0.915047	0.919585	0.846929	0.768179	0.723794	0.642861	0.611508	0.618041	0.587162	0.626398	0.555131	0.703068	0.8814	1	0.973741	0.935623	0.949393	0.899777	0.819082	0.736595	0.673942	0.605064	0.564633	0.518574	0.488433	0.542745	0.523396	0.679544	0.779249		-0.0927247	0.64919	0.760694		-0.105344	0.57927	0.834501	Yes	Yes
P00395	MT-CO1	3	2	1	0.997454	1.0442	1.04289	0.95569	0.890036	0.769364	0.546323	0.391617	0.327895	0.232712	0.202509	0.159384	0.139674	0.142805	0	1	1.10419	1.12502	1.13215	1.10877	0.859441	0.808526	0.58603	0.504198	0.287791	0.255005	0.223867	0.141497	0.0744722	0.0546708	0	10.5566	-0.136862	0	0.993387	10.8712	-0.146478	0	0.972665	Yes	Yes	Yes	Yes
P00403	MT-CO2	14	17	1	1.0502	0.998965	0.97639	0.925665	0.860878	0.647026	0.430141	0.292908	0.181381	0.118741	0.0897804	0.0644291	0.0447126	0.0405661	0.0219178	1	1.06957	1.02104	0.972073	0.929027	0.834186	0.657108	0.449677	0.311942	0.209693	0.145289	0.10879	0.0730347	0.0620722	0.0537159	0.0422475	9.57209	-0.182081	0	0.998066	9.64774	-0.16776	0	0.997176	Yes	Yes	Yes	Yes
P00414	MT-CO3		1																	1	0.86931	0.88482	0.725072	0.7171	0.624456	0.514404	0.29973	0.179875	0.117986	0.093331	0.0593721	0.0529626	0.0260984	0.0137142	0.0190203					7.86055	-0.169621	0	0.94575		Yes		Yes
P00439	PAH		3																	1	1.10221	1.22044	1.13248	1.04116	1.07791	0.941609	0.791251	0.71738	0.503988	0.632236	0.500326	0.258785	0.218464	0.183254	0.253621					13.6745	-0.0983469	0.0383439	0.926402		Yes		Yes
P00441	SOD1	14	11	1	0.963047	0.928694	0.953704	1.00767	0.948329	0.825596	0.892944	0.817181	0.804249	0.795723	0.878226	1.05519	0.84185	1.09989	1.97553	1	0.987354	0.954483	1.11066	0.819086	0.940775	0.966931	0.863109	0.786838	0.745618	0.724262	0.668179	0.766671	0.792095	1.01553	1.12748						-0.170112	0.851005	0.25835	No	Yes
P00451	F8	2		1	0.919554	0.952752	0.903954	0.847925	0.64406	0.498019	0.345085	0.297416	0.253138	0.24105	0.208599	0.164509	0.155344	0.112816	0.0823861																	8.71795	-0.133607	0.00630849	0.991332					Yes		Yes
P00491	PNP	60	57	1	0.998631	0.982925	1.00775	0.995772	0.973152	0.862562	0.843025	0.755798	0.722246	0.710364	0.711141	0.694339	0.596841	0.465303	0.153931	1	1.01319	1.01469	0.999672	1.02133	0.965577	0.866067	0.798824	0.70874	0.651107	0.600036	0.558279	0.585139	0.553411	0.454401	0.133027	17.684	-0.0574992	0	0.873827	15.9861	-0.0618439	0	0.925988	Yes	Yes	Yes	Yes
P00492	HPRT1	32	32	1	0.993885	0.987541	0.979769	1.0342	0.950634	0.888685	0.845471	0.738646	0.716813	0.709389	0.690107	0.738268	0.644882	0.824739	1.05229	1	0.992698	0.999192	0.976599	1.00445	0.993805	0.894732	0.795169	0.727858	0.650745	0.598092	0.57683	0.663133	0.653502	0.818708	0.89451		-0.0910385	0.766333	0.595239		-0.125405	0.696054	0.780411	Yes	Yes
P00505	GOT2	66	78	1	0.961464	0.884885	0.932027	0.912907	0.828731	0.856324	0.74056	0.69678	0.609469	0.686428	0.663452	0.681232	0.553853	0.769131	1.07829	1	0.906506	0.893195	1.13146	0.889671	0.817239	0.764903	0.687458	0.622563	0.570611	0.523076	0.507631	0.57963	0.576204	0.711457	0.833931		-0.0765916	0.718197	0.398134		-0.110599	0.614495	0.740926	Yes	Yes
P00519-2	ABL1	5	5	1	0.938835	0.9276	0.982042	0.842588	0.69055	0.579011	0.390965	0.268362	0.265626	0.215977	0.185236	0.180626	0.146754	0.126387	0.123576	1	0.900661	0.923697	0.902248	0.850335	0.766516	0.571457	0.425688	0.310358	0.221893	0.179153	0.155733	0.137127	0.104229	0.103785	0.112216	9.01543	-0.141376	0.0511976	0.992079	9.22293	-0.139977	0	0.986448	Yes	Yes	Yes	Yes
P00533	EGFR	43	31	1	1.00359	1.01288	1.01788	0.982448	0.918839	0.792391	0.628671	0.493321	0.370992	0.299064	0.240564	0.191192	0.153862	0.141673	0.137743	1	1.00075	1.00011	0.974955	0.955875	0.90353	0.801144	0.638367	0.503073	0.387398	0.301593	0.253844	0.19515	0.149579	0.115522	0.113796	11.1271	-0.129605	0.053594	0.999369	11.2613	-0.120957	0	0.999006	Yes	Yes	Yes	Yes
P00558	PGK1	154	222	1	0.997314	0.993969	0.989639	1.02512	0.961976	0.873059	0.85205	0.760884	0.712728	0.678493	0.601127	0.513019	0.392318	0.146289	0.0574243	1	0.991013	0.99419	1.00173	1.00243	0.95203	0.873991	0.799144	0.706663	0.644036	0.588802	0.536049	0.498046	0.398641	0.149746	0.0562911	15.1286	-0.0944188	0	0.940452	14.3689	-0.0864701	0	0.946745	Yes	Yes	Yes	Yes
P00568	AK1	16	7	1	0.98027	0.971488	0.978838	1.00345	0.99168	0.87689	0.837344	0.699731	0.62296	0.502402	0.383851	0.248977	0.188164	0.0812172	0.0514366	1	0.996283	0.954839	0.974519	0.971743	0.964809	0.872094	0.812708	0.705162	0.613476	0.489605	0.39515	0.28989	0.205044	0.0693664	0.0684616	13.2638	-0.121432	0	0.987457	13.2426	-0.115166	0	0.984482	Yes	Yes	Yes	Yes
P00742	F10		1																	1	0.778809	0.884766	0.653451	0.869233	0.721402	0.654642	0.504495	0.270713	0.319937	0.208598	0.185352	0.171287	0.0937707	0.118815	0.211105					9.29985	-0.120454	0	0.871854		Yes		Yes
P00749	PLAU	4	4	1	1.04614	1.06748	1.04754	1.05958	0.951589	0.843368	0.726062	0.615825	0.570038	0.533915	0.448907	0.474086	0.384895	0.340004	0.189279	1	0.95936	1.00327	0.965704	0.939666	0.776707	0.884773	0.718866	0.520916	0.397522	0.405205	0.419401	0.367868	0.302253	0.34498	0.205793	13.9645	-0.0739788	0	0.973354	12.2792	-0.0883098	0.0979555	0.96347	Yes	Yes	Yes	Yes
P00813	ADA	19	16	1	0.97328	0.971474	0.996909	0.976322	0.927616	0.857204	0.793854	0.730847	0.727086	0.704278	0.68075	0.76464	0.67722	0.804584	1.00485	1	1.04691	1.00427	0.974242	1.0143	0.90649	0.821234	0.752047	0.648815	0.57925	0.507183	0.479682	0.509981	0.492495	0.585127	0.646588		-0.0919857	0.762644	0.653011		-0.107138	0.526857	0.951344	Yes	Yes
P00846	MT-ATP6	2	2	1	0.977457	0.898123	1.02014	0.919504	1.00827	0.718349	0.441854	0.38121	0.259253	0.204736	0.206274	0.169037	0.132333	0.158148	0.163783	1	1.03512	0.945332	1.04883	0.933362	0.952199	0.688286	0.427403	0.383512	0.298612	0.177849	0.147113	0.122985	0.0774262	0.0970796	0.0733153	9.94376	-0.205917	0.15348	0.985479	10.0055	-0.165504	0.0452131	0.990063	Yes	Yes	Yes	Yes
P00918	CA2	16	23	1	0.971249	0.971073	0.95573	0.960267	0.937607	0.885637	0.840817	0.746558	0.687031	0.651368	0.630739	0.600039	0.508637	0.332942	0.0397842	1	0.933638	1.01315	1.00334	0.971256	0.938579	0.902238	0.844566	0.662654	0.638951	0.577477	0.520725	0.479725	0.444114	0.334675	0.0755022	15.7733	-0.0736595	0	0.898294	14.6763	-0.0768348	0	0.953133	Yes	Yes	Yes	Yes
P00966	ASS1	17	20	1	0.94696	0.942763	0.925369	0.876391	0.740495	0.545475	0.364471	0.256769	0.181357	0.142857	0.119754	0.116006	0.097948	0.109966	0.0628753	1	0.935597	0.913605	0.879089	0.892566	0.707979	0.471757	0.330156	0.244271	0.171505	0.132171	0.108135	0.103531	0.09285	0.104484	0.0628143	8.92485	-0.163539	0.0237204	0.994353	8.62833	-0.172182	0.0300237	0.988869	Yes	Yes	Yes	Yes
P01008	SERPINC1	24	20	1	0.966572	0.957273	0.947097	0.973474	0.918434	0.817474	0.795297	0.7131	0.676827	0.628428	0.584669	0.557442	0.457457	0.353851	0.309127	1	1.01188	1.02637	1.0421	1.0171	0.977956	0.84764	0.771994	0.636013	0.599588	0.521807	0.485304	0.465101	0.385372	0.310864	0.238123	16.0814	-0.0588765	0	0.97079	14.2468	-0.0730816	0	0.987773	Yes	Yes	Yes	Yes
P01033	TIMP1	6	6	1	1.05571	0.972036	1.01391	1.03275	0.969592	0.909255	0.902264	0.835848	0.803262	0.823215	0.778589	0.84673	0.758407	0.928836	1.17939	1	1.09569	1.03288	1.08461	1.00713	0.926824	0.878313	0.83303	0.724718	0.619054	0.560327	0.551043	0.560254	0.520268	0.654196	0.68739		-0.0638266	0.872008	0.328966		-0.0999332	0.578952	0.922477	Yes	Yes
P01034	CST3	5	5	1	1.08353	1.09198	1.01189	1.05976	1.01197	0.986893	0.919043	0.838665	0.845611	0.853006	0.876267	0.9188	0.835734	1.08187	1.31502	1	1.06705	0.95327	0.956893	0.969004	0.944365	0.882049	0.845288	0.747377	0.667027	0.639691	0.606693	0.637465	0.62122	0.866661	0.979734		-0.368456	0.942668	0.101707		-0.0934857	0.719268	0.615882	Yes	Yes
P01036	CST4	1		1	0.863832	0.80392	1.2567	0.814123	0.798929	0.604968	0.738263	0.410398	0.552851	0.357492	0.335255	0.412484	0.552549	2.68025	0																		-0.213062	0.672174	0.0519429					Yes
P01037	CST1	1		1	0.839363	0.640357	0.930291	0.658909	0.797578	0.749845	0.775151	0.728713	0.587828	0.687452	0.830175	0.866609	0.905506	1.90843	1.22328																			0.875299	0.00982636					Yes
P01106-2	MYC	3		1	0.968073	0.982125	0.995129	0.87753	0.795308	0.603661	0.393185	0.27301	0.168159	0.123034	0.104183	0.0883278	0.0651631	0.0712809	0.0623767																	9.23991	-0.170468	0.00595694	0.997134					Yes		Yes
P01111	NRAS	15	11	1	1.02691	1.00322	0.992484	1.02818	0.957839	0.898409	0.815985	0.710272	0.648685	0.668114	0.646022	0.639009	0.534808	0.645778	0.734746	1	1.02413	0.965095	1.02048	1.04611	0.976095	0.864466	0.781259	0.684228	0.621792	0.546403	0.528978	0.567329	0.534142	0.585175	0.595335		-0.095337	0.634394	0.946366		-0.105221	0.549199	0.98056	Yes	Yes
[truncated: 8,235 more rows]
