# Supplementary material for: Assessing target engagement using proteome-wide solvent shift assays
Source: eLife. 2021 Dec 8;10:e70784. doi: 10.7554/eLife.70784 (PMC8654358; doi:10.7554/eLife.70784)
Supplement: Figure 2—source data 1. — N = 2. [file elife-70784-fig2-data1.xlsx]

## Sheet: legend
The table contains two repeat experiments.
Each repeat experiment is in one single TMTpro-16plex group.
Each replicate contains a DMSO-treated 8-concentration SPP experiment and a SCIO469-treated 8-concentration SPP experiment.
	Vehicle								SCIO469
AEA (%)	0	3	6	9	12	15	18	21	0	3	6	9	12	15	18	21
TMTpro labeling	126	127N	127C	128N	128C	129N	129C	130N	130C	131N	131C	132N	132C	133N	133C	134N
Peptides	The number of quantified peptides
norm_rel_fc	Protein quantifications (scaled to the first concentration, then normalized by TPP package to account for technical errors)
meltPoint	Denaturation concentration determined by TPP pacakge
slope	Curve slope determined by TPP pacakge
plateau	Curve plateau determined by TPP pacakge
R_sq	Curve R2 determined by TPP package
diff_meltP_SCIO469_vs_Vehicle	Difference between this protein’s denaturation concentration in DMSO experiment and SCIO469 experiment
min_slope_SCIO469_vs_Vehicle	Minimum slope of this protein′s fitted curves in DMSO experiment and scio469 experiment
pVal_adj_SCIO469_vs_Vehicle	Benjamini-Hochberg–adjusted P value of this protein’s denaturation concentration difference between DMSO experiment and SCIO469 experiment
passed_filter_SCIO469_vs_Vehicle	Did this protein meet the quality criteria (R2 > 0.8, plateau <0.3) in DMSO experiment and SCIO469 experiment?
diff_meltP_Vehicle_1_vs_Vehicle_2	Difference between this protein’s denaturation concentration in the two DMSO experiments
min_pVals_less_0.1_and_max_pVals_less_0.2	Is one of the P values for the two replicate experiments <0.05 and the other one <0.1?
meltP_diffs_have_same_sign	Do the denaturation concentration shifts in the two DMSO vs SCIO469 experiments have the same sign?
meltP_diffs_T_vs_V_greater_V1_vs_V2	Are both the denaturation concentration differences in the DMSO vs SCIO469 experiments greater than the denaturation concentration difference between the two DMSO experiments?
minSlopes_less_than_0.06	Is the minimum slope in each of the DMSO vs. SCIO469 experiments <−0.06?
fulfills_all_4_requirements	Does this protein fulfill all of the four requirements above?
model_converged	Does the fitting of the sigmoidal curve succeed?
Pass_R2(0.8)&Plateau(0.3)	Does the curve have a R2 greater than 0.3, a plateau smaller than 0.3, a valid denaturation concentration, and a valid slope?
For details for column names and TPP package: Franken, H., Mathieson, T., Childs, D. et al. Thermal proteome profiling for unbiased identification of direct and indirect drug targets using multiplexed quantitative mass spectrometry. Nat Protoc 10, 1567–1593 (2015). https://doi.org/10.1038/nprot.2015.101

## Sheet: SCIO469_SPP_8Concentrations_2Re
Uniprot ID	Gene Symbol	Peptides_Rep1	Peptides_Rep2	norm_rel_fc_126_Vehicle_1	norm_rel_fc_127N_Vehicle_1	norm_rel_fc_127C_Vehicle_1	norm_rel_fc_128N_Vehicle_1	norm_rel_fc_128C_Vehicle_1	norm_rel_fc_129N_Vehicle_1	norm_rel_fc_129C_Vehicle_1	norm_rel_fc_130N_Vehicle_1	norm_rel_fc_126_Vehicle_2	norm_rel_fc_127N_Vehicle_2	norm_rel_fc_127C_Vehicle_2	norm_rel_fc_128N_Vehicle_2	norm_rel_fc_128C_Vehicle_2	norm_rel_fc_129N_Vehicle_2	norm_rel_fc_129C_Vehicle_2	norm_rel_fc_130N_Vehicle_2	norm_rel_fc_130C_SCIO469_1	norm_rel_fc_131N_SCIO469_1	norm_rel_fc_131C_SCIO469_1	norm_rel_fc_132N_SCIO469_1	norm_rel_fc_132C_SCIO469_1	norm_rel_fc_133N_SCIO469_1	norm_rel_fc_133C_SCIO469_1	norm_rel_fc_134N_SCIO469_1	norm_rel_fc_130C_SCIO469_2	norm_rel_fc_131N_SCIO469_2	norm_rel_fc_131C_SCIO469_2	norm_rel_fc_132N_SCIO469_2	norm_rel_fc_132C_SCIO469_2	norm_rel_fc_133N_SCIO469_2	norm_rel_fc_133C_SCIO469_2	norm_rel_fc_134N_SCIO469_2	meltPoint_Vehicle_1	slope_Vehicle_1	plateau_Vehicle_1	R_sq_Vehicle_1	meltPoint_Vehicle_2	slope_Vehicle_2	plateau_Vehicle_2	R_sq_Vehicle_2	meltPoint_SCIO469_1	slope_SCIO469_1	plateau_SCIO469_1	R_sq_SCIO469_1	meltPoint_SCIO469_2	slope_SCIO469_2
A0AV02-2	SLC12A8	5	2	1	1.09161	0.942248	0.807773	0.450517	0.227759	0.141381	0.104004	1	0.945899	0.939715	0.829015	0.466516	0.261464	0.198094	0.128265	1	0.97767	0.985476	0.84063	0.516748	0.260094	0.184909	0.109365	1	0.965536	0.907077	0.772601	0.430441	0.249475	0.165025	0.105602	11.4918	-0.126592	0.00881965	0.990763	11.7161	-0.123758	0.0616542	0.993455	12.0725	-0.118369	0.00921593	0.99877	11.289	-0.116731
A0AV96	RBM47	7	7	1	0.903829	0.969805	0.771514	0.371663	0.228524	0.154261	0.0867166	1	1.05071	1.04287	0.889173	0.407335	0.168489	0.0816501	0.0492498	1	0.98128	1.0461	0.885153	0.495003	0.288058	0.16386	0.118671	1	1.00536	1.04379	0.887457	0.431656	0.189353	0.0988292	0.0576417	10.9633	-0.138358	0.0466598	0.989594	11.4342	-0.175876	0.0283976	0.996715	12.0893	-0.132621	0.0637619	0.99682	11.5715	-0.164619
A0AVF1	TTC26	8	10	1	0.96327	0.906923	0.783634	0.374196	0.138114	0.0717167	0.0455311	1	1.02395	0.967291	0.803954	0.378499	0.136051	0.067445	0.041455	1	1.00314	1.02173	0.812106	0.362978	0.152761	0.0953895	0.057897	1	0.978332	1.01785	0.793689	0.351228	0.14522	0.0884831	0.0450449	10.8792	-0.156954	0	0.992401	10.9923	-0.162449	0	0.998713	10.9664	-0.167019	0.0295921	0.999454	10.8602	-0.164803
A0AVI4	TMEM129	2	1	1	1.26297	1.35348	0.767067	0.518532	0.297356	0.209575	0.124885	1	1.19698	1.17313	1.00609	0.407648	0.168651	0.127186	0.162422	1	0.980409	0.874866	0.750874	0.405259	0.180885	0.094914	0.0776016	1	1.17588	1.21273	0.955528	0.425795	0.318998	0.180792	0	11.9878	-0.116282	0.0532777	0.872355	11.7025	-0.362508	0.149282	0.95708	10.8818	-0.134834	0	0.987763	12.0829	-0.140294
A0AVT1	UBA6	72	67	1	1.01041	1.03329	0.903822	0.514329	0.196058	0.0517907	0.0252375	1	0.995221	1.03336	0.908071	0.55247	0.231678	0.0762432	0.0325988	1	1.02449	1.03857	0.930869	0.526666	0.194838	0.0635112	0.0295401	1	1.00665	1.00917	0.909799	0.565701	0.225339	0.0808304	0.0359307	12.0359	-0.166584	0	0.998033	12.3075	-0.155361	0	0.998021	12.1587	-0.169867	0	0.99831	12.3682	-0.15637
A0JLT2	MED19	3	1	1	0.951249	1.07631	0.791189	0.337841	0.164804	0.0703983	0.0369675	1	1.03628	0.77811	0.791914	0.443328	0.288158	0.206687	0.264089	1	1.00454	0.926895	0.727579	0.335876	0.124176	0.0664476	0.0267434	1	0.935019	0.973773	0.778666	0.399979	0.157715	0.16488	0.180154	10.8377	-0.165575	0.00874755	0.993045	11.3228	-0.0904473	0	0.94529	10.478	-0.160028	0	0.996266	10.8607	-0.162135
A0JNW5	UHRF1BP1L	18	19	1	0.877667	0.851784	0.724356	0.330941	0.109513	0.0462853	0.0278231	1	0.955028	0.96206	0.824135	0.442039	0.155008	0.060246	0.0272441	1	0.968504	1.01581	0.838797	0.410784	0.134589	0.0572434	0.0398604	1	0.984969	0.981354	0.850245	0.459181	0.171243	0.058397	0.0406512	10.3915	-0.162899	0	0.969642	11.3545	-0.158511	0	0.995602	11.2592	-0.167726	0	0.998456	11.559	-0.158253
A0MZ66-3	KIAA1598	64		1	1.05625	1.05186	0.972221	0.849739	1.04158	1.23112	1.05504									1	1.00331	1.03663	1.00014	0.863566	1.05488	0.989693	0.851067											1.03683	0.0150099						-0.155508	0.939802	0.235137
A0MZ66	KIAA1598		53									1	1.00003	1.03954	0.972776	0.827393	1.14776	1.40291	1.46069									1	0.999426	1.07269	1.01262	0.891062	1.09463	1.26326	1.27453						0.137545	1.45265	0.902296						0.130742
A0PJW6	TMEM223	5	2	1	0.948434	0.872982	0.723095	0.355412	0.166674	0.122927	0.0863733	1	0.971651	0.880747	0.750148	0.397451	0.161757	0.0668854	0.0524496	1	0.975909	0.943748	0.783174	0.407559	0.206311	0.131148	0.102923	1	0.933579	0.991024	0.815391	0.366775	0.201071	0.0466539	0.0531255	10.5337	-0.133336	0	0.986561	10.8191	-0.144856	0	0.987581	11.1246	-0.135466	0.0280966	0.997441	11.08	-0.155627
A0PK00	TMEM120B	3	2	1	1.24568	1.14303	0.957734	0.523093	0.28163	0.124544	0.0675152	1	1.02456	0.823233	0.873656	0.482404	0.179683	0.200694	0.14137	1	1.04911	1.01121	0.766613	0.392917	0.198113	0.103453	0.0717088	1	0.960699	1.11424	0.841639	0.453033	0.29459	0.24808	0.0688612	12.3862	-0.147132	0.0294465	0.946573	11.6761	-0.1572	0.114357	0.964605	11.0225	-0.138653	0	0.997675	11.8785	-0.122591
A1A4S6	ARHGAP10	11	20	1	1.05287	1.01828	0.815811	0.341854	0.151559	0.0924125	0.0535722	1	0.987057	0.949719	0.74766	0.29918	0.0940883	0.0439562	0.037179	1	1.04496	1.04493	0.824169	0.344417	0.14949	0.0867162	0.0497491	1	0.987741	0.954939	0.728241	0.295602	0.0962834	0.0488183	0.0350641	10.8829	-0.175193	0.0365274	0.997543	10.4278	-0.178665	0	0.998129	10.9259	-0.177307	0.0333051	0.996887	10.3384	-0.175495
A1A5C7	SLC22A23	1		1	0.955615	0.923603	0.909094	0.527824	0.34971	0.204728	0.0995075									1	1.03124	1.13092	0.93101	0.603522	0.391698	0.243246	0.110109									12.6453	-0.11154	0	0.988061					13.3476	-0.106565	0	0.979747
A1A5D9	CCDC64B	2	1	1	0.860457	1.86346	0.936501	0.621107	0.707188	0.56777	0.351234	1	1.00791	1.08518	0.971097	0.56576	0.541138	0.348906	0.199412	1	0.988337	1.06106	1.01236	0.735561	0.690101	0.533604	0.344083	1	0.874876	1.02656	1.02712	0.610237	0.364726	0.290463	0.233051	17.8832	-0.062644	0.289294	0.440937	14.4046	-0.0813916	0	0.958991	17.8819	-0.0596602	0	0.958631	12.8896	-0.165818
A1L0T0	ILVBL	21	18	1	1.02424	1.01357	0.83616	0.425488	0.241593	0.152176	0.0862021	1	0.995857	0.95236	0.809671	0.424388	0.223154	0.137913	0.0831223	1	1.02119	1.0026	0.81043	0.406193	0.223826	0.136681	0.0905586	1	0.978119	0.954225	0.820253	0.435259	0.227738	0.12713	0.0878517	11.4849	-0.139581	0.0473889	0.998355	11.3708	-0.132137	0.0101737	0.998453	11.2573	-0.142111	0.0450377	0.999281	11.465	-0.132701
A1L170-2	C1orf226	2	1	1	0.949259	0.938441	0.852465	0.613161	0.552727	0.439405	0.359332	1	1.02049	0.987489	0.88519	0.786634	0.497808	0.397951	0.190531	1	1.04322	1.14121	0.960231	0.711526	0.637629	0.479259	0.311921	1	0.99119	1.01636	0.908068	0.604744	0.295758	0.418625	0.251256	15.6851	-0.0588332	0	0.984564	15.2524	-0.0832604	0	0.984217	16.8186	-0.0636221	0	0.947933	12.7734	-0.133536
A1L390	PLEKHG3	4	5	1	0.978955	1.04994	0.835681	0.421696	0.194909	0.106286	0.0742017	1	0.941911	1.01047	0.840881	0.474676	0.243044	0.121591	0.124195	1	0.978945	1.00287	0.841233	0.408786	0.195517	0.102879	0.0735816	1	0.943832	0.964576	0.816342	0.450479	0.216532	0.127308	0.0911004	11.3793	-0.151025	0.0263796	0.997394	11.7266	-0.135111	0.0417188	0.995797	11.3283	-0.154277	0.0310357	0.999519	11.503	-0.131938
A1L3X0	ELOVL7	2	2	1	1.15721	1.12353	1.16568	0.658189	0.443127	0.229817	0.103253	1	1.04382	1.01849	0.811513	0.462898	0.204794	0.0752023	0.0251875	1	1.12791	1.20485	0.990411	0.576274	0.345189	0.186188	0.133494	1	1.01881	1.07565	0.830651	0.425627	0.142254	0.0656464	0.0310803	13.9933	-0.123827	0.0389749	0.934304	11.4885	-0.145889	0	0.995511	12.8509	-0.139474	0.103046	0.95265	11.3105	-0.163604
A1X283	SH3PXD2B	41	35	1	0.970276	0.980008	0.942568	0.74794	0.409699	0.0980136	0.0651131	1	0.977376	0.98216	0.924685	0.743056	0.505764	0.11735	0.0557697	1	1.00504	1.00746	0.939257	0.799059	0.446796	0.104915	0.0676524	1	1.01409	0.983825	0.947895	0.803633	0.530582	0.140649	0.0790784	13.8786	-0.145548	0	0.992665	14.2581	-0.134154	0	0.980137	14.2668	-0.150815	0	0.993057	14.7268	-0.139752
A1XBS5	FAM92A1	8	8	1	0.99786	0.988895	0.822565	0.486944	0.192178	0.0691409	0.0386062	1	1.05124	1.02384	0.933815	0.514046	0.275196	0.171147	0.144299	1	0.979746	1.00051	0.865536	0.480879	0.169112	0.0633916	0.0401278	1	1.0166	1.03105	0.915408	0.530576	0.246637	0.133039	0.0884338	11.6174	-0.147399	0	0.996848	12.1787	-0.154323	0.120533	0.996745	11.7162	-0.160287	0	0.998528	12.2463	-0.145367
A2A3K4-2	PTPDC1	1		1	0.890199	0.917348	0.714487	0.381772	0.0737131	0.00123517	0									1	0.975846	1.00685	0.770828	0.345583	0.111326	0	0									10.4879	-0.171032	0	0.975712					10.6853	-0.180773	0	0.996131
A2RRP1	NBAS	52	30	1	1.0157	0.97645	0.75548	0.298084	0.103466	0.0629672	0.0463785	1	0.978968	0.903943	0.720324	0.289819	0.0875279	0.068447	0.0636727	1	0.96877	0.921412	0.712429	0.277496	0.103421	0.0705125	0.0461754	1	0.996452	0.940302	0.706623	0.283228	0.10307	0.0790464	0.0564681	10.4601	-0.180129	0.0131064	0.999432	10.2549	-0.173813	0.0121267	0.99261	10.212	-0.171619	0.00570986	0.995393	10.1978	-0.172461
A2RTX5	TARSL2	18	15	1	1.00218	0.986013	0.874042	0.609257	0.3865	0.181834	0.0800445	1	1.00783	0.977109	0.844365	0.581773	0.397683	0.227468	0.124842	1	0.999278	1.00902	0.916249	0.643611	0.419553	0.20181	0.0831772	1	1.0138	1.04302	0.913838	0.598913	0.405649	0.231037	0.133563	13.0435	-0.111948	0	0.994244	12.9379	-0.098935	0	0.995813	13.5039	-0.111954	0	0.994668	13.324	-0.102664
A2RU49	HYKK	2	1	1	1.05218	1.15081	0.9148	0.482267	0.351499	0.239306	0.0726672	1	0.96743	1.15575	0.85852	0.476007	0.237881	0.141918	0.0500487	1	1.03296	0.986686	0.877631	0.524221	0.307787	0.167418	0.0569812	1	1.04642	1.13344	0.761247	0.45925	0.305835	0.177085	0.0911926	12.4335	-0.119274	0.0428531	0.966579	11.8664	-0.136327	0	0.979258	12.3329	-0.122665	0	0.996432	11.6634	-0.114289
A2RU67	KIAA1467	7		1	1.06405	1.06682	0.993768	0.733008	0.614274	0.594981	0.449756									1	1.00413	1.04371	0.923077	0.703339	0.626016	0.42483	0.312829										-0.071818	0.457289	0.957249					16.3153	-0.0647678	0	0.984451
A2RUB1	C17orf104	2		1	0.801268	0.794709	0.70349	0.406766	0.236717	0.170488	0.1317									1	1.07033	0.92874	0.837901	0.52329	0.289062	0.23005	0.158572									10.4191	-0.107014	0	0.919192					12.1791	-0.1103	0.0551843	0.989948
A2RUB6	CCDC66	1	3	1	1.03458	1.06397	0.751462	0.441146	0.319947	0.22011	0.0704063	1	1.01506	1.09769	0.85882	0.466799	0.237934	0.192228	0.109857	1	1.01018	0.956786	0.774644	0.347551	0.233858	0.168396	0.102887	1	0.98006	0.997998	0.863155	0.43827	0.227849	0.187904	0.141985	11.5808	-0.110016	0	0.985636	11.7253	-0.14292	0.0880937	0.9903	10.811	-0.151348	0.0930164	0.996718	11.4931	-0.157162
A2RUC4	TYW5	10	7	1	0.993192	0.969627	0.874185	0.4731	0.244248	0.119731	0.0744063	1	1.01117	1.10054	0.911033	0.480992	0.225434	0.0964329	0.0445823	1	0.990854	1.00409	0.963089	0.482044	0.274198	0.126044	0.0767245	1	1.0255	1.07702	0.978697	0.517432	0.214132	0.0951912	0.0470162	11.8706	-0.136623	0.00489355	0.998975	11.9701	-0.151931	0.00100674	0.991897	12.1166	-0.158935	0.0640304	0.995424	12.2015	-0.178038
A2VDJ0-5	KIAA0922	6	6	1	0.98056	1.22176	0.812499	0.451675	0.232068	0.104531	0.0771475	1	1.00409	1.0623	0.901093	0.482451	0.2326	0.111643	0.0668085	1	0.977084	0.959864	0.851931	0.457204	0.217731	0.107122	0.0806753	1	1.01512	1.00669	0.82921	0.438168	0.211205	0.118438	0.064732	11.5668	-0.137677	0.00572652	0.9626	11.9498	-0.14871	0.0206002	0.996523	11.6515	-0.140167	0.00793738	0.998304	11.4955	-0.138548
A3KMH1	VWA8	49	52	1	0.971455	0.956723	0.73937	0.343742	0.147666	0.0945243	0.0670532	1	0.999369	0.922718	0.725293	0.316865	0.107984	0.0563735	0.0518363	1	0.967712	0.964873	0.754604	0.34713	0.161257	0.0996592	0.0715639	1	0.982263	0.956024	0.731083	0.299565	0.113686	0.0789659	0.0468985	10.6044	-0.151505	0.00882249	0.998342	10.3904	-0.164398	0	0.995928	10.6901	-0.153374	0.0219333	0.998574	10.3765	-0.169635
A3KN83	SBNO1	36	34	1	1.09706	1.088	0.985904	0.523755	0.159455	0.0768713	0.0379694	1	1.02038	1.06193	0.918754	0.529081	0.140558	0.0569979	0.0467342	1	1.01676	1.02889	0.940989	0.492015	0.144988	0.0711787	0.0483532	1	1.02389	1.02102	0.952769	0.565066	0.142142	0.0682249	0.0523434	12.144	-0.21011	0.0366066	0.988805	12.0713	-0.185738	0.00536544	0.995818	11.9313	-0.19567	0.0273729	0.999105	12.2788	-0.216055
A4D126	ISPD	2	3	1	0.795826	0.91717	0.777122	0.586138	0.471378	0.271212	0.23724	1	0.91457	0.898199	0.909604	0.580624	0.425132	0.273332	0.106234	1	0.824775	1.10688	0.991797	0.793661	0.535311	0.386804	0.292787	1	0.812518	0.852694	0.865297	0.778789	0.498307	0.295235	0.12516	13.1843	-0.0777598	0	0.912703	13.3187	-0.0980291	0	0.968956	15.5271	-0.0933119	0.198545	0.933596	14.7247	-0.0999547
A4D1E9	GTPBP10	19	18	1	1.01163	0.944343	0.76948	0.328223	0.136629	0.0875913	0.0597399	1	0.987242	0.950468	0.765259	0.338879	0.142984	0.0608763	0.0357884	1	0.994427	0.937892	0.718664	0.315344	0.138497	0.0823482	0.054714	1	0.978775	0.938782	0.73412	0.346892	0.140448	0.0717912	0.0429744	10.6423	-0.166394	0.0229865	0.997935	10.688	-0.161854	0	0.998357	10.4008	-0.154497	0	0.998065	10.5712	-0.154356
A4D1P6	WDR91	9	11	1	0.999954	1.03369	0.921155	0.507596	0.277415	0.162381	0.122734	1	0.96949	0.938723	0.855752	0.506532	0.329206	0.248801	0.188429	1	0.992321	0.986308	0.884401	0.516606	0.270952	0.158037	0.09495	1	0.993093	1.00474	0.863617	0.546509	0.318982	0.235268	0.173924	12.168	-0.145845	0.0900959	0.998253	12.2089	-0.114781	0.126063	0.994615	12.2013	-0.128111	0.0184452	0.999697	12.4589	-0.113916
A4D1S5-2	RAB19		3									1	1.00274	1.09596	0.927298	0.548038	0.441888	0.437556	0.350446									1	0.903133	0.991853	0.843929	0.500377	0.358579	0.363406	0.342437					12.7948	-0.141882	0.388427	0.980727					11.9023	-0.140435
A4D1U4	LCHN	5	1	1	1.07103	1.12883	0.874729	0.488377	0.283183	0.219852	0.148844	1	1.03933	0.992948	0.758662	0.458313	0.407916	0.329278	0.238514	1	1.01577	1.03976	0.864347	0.485049	0.286419	0.167867	0.0996993	1	1.07237	1.20848	0.982327	0.617964	0.353328	0.398926	0.30878	11.957	-0.138156	0.129994	0.980358	11.9016	-0.102516	0.202924	0.991057	12.026	-0.125821	0.0308951	0.997195	12.7123	-0.213882
A4D2B0	MBLAC1	1	1	1	0.925488	1.06225	0.895423	0.625546	0.519776	0.606323	0.430711	1	0.930238	1.11638	0.97569	0.714058	0.663647	0.641397	0.589022	1	1.07492	1.18679	1.17303	0.658535	0.535507	0.549566	0.361725	1	1.06326	0.981301	0.849236	0.768669	0.72447	0.592204	0.479091		-0.102409	0.495311	0.940086		-0.0995456	0.620937	0.925689	13.6321	-0.25185	0.480408	0.876526		-0.0402711
A5A3E0	POTEF	1	94	1	1.34257	1.55652	1.48779	0.971947	0.92036	0.531595	0.147493	1	1.01416	1.00527	0.901957	0.670255	0.627136	0.475403	0.204772	1	1.01855	1.00326	0.928779	0.634936	0.60138	0.21505	0.0814787	1	1.01122	1.01965	0.938914	0.724796	0.622152	0.466666	0.23259	18.1413	-0.175467	0	0.588447	15.8428	-0.0682829	0	0.953804	14.2821	-0.100882	0	0.954548	16.2171	-0.0708005
A5D8V6	VPS37C	3	4	1	0.965686	0.939076	0.842467	0.704506	0.601508	0.532062	0.455608	1	1.07561	1.12113	1.00208	0.754521	0.742367	0.848948	0.634155	1	1.01769	1.03461	0.994051	0.814185	0.708973	0.530702	0.460658	1	1.0118	1.15559	1.10023	0.762205	0.727937	0.69119	0.674554	19.1687	-0.0467933	0	0.994027		-0.341414	0.741824	0.801897	19.3964	-0.0563046	0.210504	0.98823		-0.222151
A5PLL7	TMEM189	4	1	1	0.931109	1.01084	0.857967	0.58445	0.489235	0.447767	0.334358	1	1.19264	1.30628	0.895122	0.560346	0.660035	0.556227	0.138075	1	1.01388	1.04088	0.941135	0.615358	0.546916	0.400264	0.324054	1	0.774978	1.06192	0.907209	0.472479	0.499207	0.468083	0.336056	14.1976	-0.0846377	0.301031	0.981685	15.6562	-0.0673762	0	0.77613	14.7929	-0.0828409	0.25191	0.982893	11.7388	-0.1969
A5PLN9-5	TRAPPC13	6	3	1	0.993582	1.02387	0.857235	0.449992	0.221713	0.0823062	0.0354782	1	0.991171	1.01995	0.832235	0.449314	0.196971	0.0487676	0.0227822	1	1.07907	1.04771	0.830871	0.460672	0.206921	0.06801	0.0356241	1	1.04527	0.938288	0.816486	0.390744	0.17226	0.086942	0.0136363	11.6403	-0.148237	0	0.998364	11.4849	-0.154821	0	0.996993	11.5622	-0.148614	0	0.992092	11.1382	-0.155904
A5YKK6	CNOT1	99	94	1	1.03535	1.01601	0.831679	0.405561	0.149002	0.0710933	0.0514248	1	1.01261	0.965855	0.791726	0.396852	0.136726	0.0554274	0.0474432	1	1.00842	0.983811	0.8049	0.376979	0.139998	0.069083	0.0503261	1	1.0026	0.983185	0.791695	0.3866	0.146862	0.0687274	0.0456856	11.2362	-0.160656	0	0.998603	11.0075	-0.159192	0	0.997993	11.0007	-0.161148	0	0.999637	10.991	-0.157196
A5YM69	ARHGEF35	2	1	1	1.0153	1.08757	0.985488	0.696273	0.709416	0.571925	0.491869	1	1.12405	0.778314	1.03475	0.847202	0.703902	0.74761	0.893558	1	1.05603	1.08506	0.915868	0.791334	0.655579	0.493317	0.403397	1	1.06762	1.30713	0.853177	0.796882	0.630934	0.820497	0.867758		-0.0579808	0.437787	0.937079		-0.668887	0.834222	0.446669	18.0584	-0.0556421	0	0.974188		-0.145547
A6NCE7	MAP1LC3B2	2	1	1	1.1593	1.06774	1.02517	0.946235	0.972557	0.839648	0.541148	1	1.10551	1.10242	0.936364	0.970496	1.08961	0.96335	0.610015	1	1.0751	1.10389	0.994047	0.876876	1.00688	0.70488	0.444723	1	0.978134	0.963909	1.00169	0.800525	0.716833	0.783519	0.494922		-0.105762	0	0.863946					18.3078	-0.954445	0.444723	0.909077		-0.0366186
A6NCS6	C2orf72	1		1	1.36511	1.47146	1.10248	0.443487	0.0890053	0	0.00227326									1	1.00609	0.983124	0.705134	0.300981	0.0700509	0.0251365	0									11.8511	-0.342948	0.0172225	0.86322					10.2247	-0.184162	0	0.997415
A6ND36	FAM83G	14	10	1	0.992064	1.02842	0.876206	0.538745	0.29	0.112988	0.0648635	1	1.00909	0.993383	0.904782	0.582957	0.335121	0.121064	0.0437506	1	1.00096	1.02181	0.922532	0.587432	0.308566	0.127053	0.0646275	1	0.992085	0.991168	0.899389	0.606707	0.351055	0.148158	0.065646	12.3076	-0.131208	0	0.997399	12.7371	-0.131001	0	0.995551	12.7439	-0.133295	0	0.998545	12.9358	-0.123421
A6NDB9	PALM3		5									1	1.0702	1.09416	1.00975	0.617039	0.507647	0.269063	0.16626									1	0.987526	1.09201	0.955097	0.639905	0.465634	0.292456	0.162297					14.2113	-0.0953098	0	0.968083					14.0902	-0.0937917
A6NDE4	RBMY1B	3		1	1.03581	1.03095	0.77088	0.389	0.201176	0.0727823	0.025209									1	0.977181	0.916501	0.749058	0.379449	0.181437	0.0821297	0.0417726									11.0035	-0.1479	0	0.996109					10.7987	-0.143734	0	0.994453
A6NDG6	PGP	29	23	1	1.03187	1.06332	0.967115	0.852231	1.00478	1.20527	0.987694	1	1.02622	1.09452	0.997542	0.855215	1.15037	1.38751	1.37798	1	1.01227	1.04688	0.969887	0.860371	1.02678	0.980254	0.810052	1	1.00976	1.03402	1.02849	0.918214	1.08095	1.22412	1.21503		0.282758	1.09648	0.248478		0.950395	1.38275	0.87615		-0.195605	0.919364	0.328388		0.466229
A6NDU8	C5orf51	6	5	1	1.02831	1.02576	0.920021	0.545084	0.331049	0.169952	0.101929	1	1.02298	1.02615	0.925356	0.536504	0.3415	0.214612	0.122351	1	1.00568	1.05761	0.982551	0.617762	0.379891	0.185466	0.102874	1	1.01746	1.03537	0.960171	0.61548	0.360229	0.213837	0.11763	12.6515	-0.120641	0.0102263	0.996729	12.6375	-0.121015	0.0661059	0.995538	13.3495	-0.118899	0	0.993066	13.2344	-0.118396
A6NE52	KIAA1875	2		1	1.26864	1.13874	0.940638	0.732428	0.566858	0.423253	0.0948783									1	1.1101	0.924657	0.729424	0.470212	0.388461	0.241536	0.0678769									15.3155	-0.0899843	0	0.888931					11.6622	-0.0981755	0	0.9696
A6NED2	RCCD1	3	2	1	1.01232	1.00139	0.836278	0.521938	0.263036	0.0592656	0.0374057	1	0.978266	0.925024	0.885021	0.521441	0.33873	0.184338	0.102543	1	0.978719	1.03125	0.922866	0.543721	0.25399	0.0977175	0.0354459	1	1.05163	1.07707	0.924322	0.581947	0.327678	0.180504	0.108462	11.9745	-0.139897	0	0.993488	12.4698	-0.112664	0	0.99207	12.3557	-0.148709	0	0.997998	12.8467	-0.121415
A6NEE1	PLEKHD1		1									1	1.07412	0.944704	0.849422	0.606704	0.651196	0.468726	0.334072									1	0.913036	0.751812	0.779713	0.608496	0.544687	0.433087	0.339347					16.4472	-0.0556551	0	0.948713					15.1538	-0.0608798
A6NEL2	SOWAHB	1	2	1	0.992955	1.00807	0.797546	0.378229	0.187521	0.212413	0.180786	1	0.996259	1.1072	0.859214	0.470894	0.218386	0.148922	0.0583008	1	1.16334	1.09222	0.860694	0.424971	0.200972	0.155367	0.126456	1	0.935731	1.00067	0.838627	0.465413	0.249838	0.165912	0.11052	10.8204	-0.175508	0.165327	0.997834	11.7798	-0.140301	0.0150743	0.989711	11.3933	-0.165638	0.104759	0.974426	11.7117	-0.131451
A6NF01	POM121B	1		1	0.937329	0.871269	0.770443	0.421228	0.289546	0.221711	0.196374									1	0.885407	1.04124	0.909987	0.49683	0.36913	0.250113	0.172626									11.3382	-0.101549	0.0304808	0.979759					12.3579	-0.125993	0.15866	0.976633
A6NFI3	ZNF316	4	2	1	0.990689	1.02846	0.826896	0.315737	0.184503	0.0917322	0.0578544	1	0.972713	0.99405	0.932326	0.471072	0.249517	0.193053	0.18066	1	0.950231	0.954637	0.796827	0.354843	0.153097	0.0681032	0.0344678	1	0.834858	0.717598	0.709168	0.485008	0.302599	0.241078	0.0817798	10.8247	-0.184446	0.0584965	0.99755	11.8152	-0.180189	0.171043	0.99922	10.8939	-0.161563	0	0.99669	10.4722	-0.0951469
A6NGB9	WIPF3	9	4	1	0.966459	0.966678	0.906309	0.718223	0.833996	1.01982	0.881789	1	1.06412	1.04663	1.01136	0.729009	0.760197	0.97246	0.880433	1	1.00079	1.06039	1.01279	0.792543	0.955814	0.971913	0.790301	1	0.94653	1.13852	1.02252	0.709687	0.688394	0.692345	0.63194		-0.0560685	0.870216	0.296383		-0.144618	0.83559	0.619073		-0.0861861	0.877752	0.527306		-0.274542
A6NGR9	MROH6	4	1	1	1.01629	1.09087	0.817207	0.310274	0.108457	0.0269525	0.0235855	1	0.965547	0.918273	0.674073	0.216334	0.0319721	0	0	1	0.980537	0.928845	0.690446	0.27196	0.102169	0.03781	0.0447783	1	1.02553	1.00961	0.67977	0.221297	0.047052	0.0125017	0	10.7631	-0.192725	0	0.994191	9.83774	-0.214182	0	0.993722	10.0963	-0.173262	0	0.996698	9.89992	-0.211467
A6NHL2	TUBAL3	1	1	1	1.19269	1.09289	1.20972	0.50258	0.226489	0.0655124	0.0495507	1	1.00679	0.986728	0.87245	0.444693	0.22117	0.0805923	0.0972116	1	1.08253	1.12186	0.890015	0.45059	0.203972	0.0738681	0.0766709	1	0.894024	0.959824	0.984316	0.601012	0.187154	0.163951	0.137007	12.1139	-0.268413	0.0874275	0.942611	11.623	-0.152896	0.0350189	0.998388	11.6881	-0.162077	0.0281766	0.984459	12.3945	-0.264205
A6NHR9	SMCHD1	81	64	1	0.968121	0.883374	0.633049	0.203508	0.08179	0.0664372	0.0412428	1	0.962389	0.855134	0.603947	0.184867	0.0687403	0.0535359	0.0418552	1	0.964364	0.871752	0.589605	0.184757	0.086021	0.0629017	0.0424399	1	0.97273	0.861437	0.592281	0.173616	0.0761277	0.0566414	0.0443764	9.62296	-0.177564	0	0.99108	9.38917	-0.178616	0	0.9867	9.3157	-0.172546	0	0.990704	9.30616	-0.177377
A6NHX0	GATSL2		3									1	1.04314	1.01097	0.811628	0.399111	0.11653	0.0188432	0.00238024									1	1.10659	1.09612	0.862051	0.409283	0.133154	0.0382435	0.0257049					11.0717	-0.17662	0	0.995557					11.3378	-0.178603
A6NI28	ARHGAP42	6	4	1	0.982875	1.00147	0.938976	0.585509	0.265915	0.165565	0.117096	1	1.02282	1.04803	0.913882	0.629512	0.321841	0.171505	0.166275	1	1.07824	1.03744	0.956593	0.609224	0.257065	0.132863	0.10613	1	1.02977	1.10781	0.969363	0.718187	0.357266	0.181754	0.183788	12.5968	-0.148111	0.0778996	0.999643	12.9766	-0.128015	0.0785567	0.995601	12.699	-0.160967	0.0681091	0.993997	13.5308	-0.14842
A6NIH7	UNC119B	13	9	1	0.963042	1.02053	0.960318	0.83779	1.02935	1.18533	0.901876	1	1.043	1.06834	0.984583	0.908987	1.19314	1.4988	1.25358	1	0.9853	1.03506	0.983629	0.88742	1.02486	0.972557	0.782023	1	1.01215	1.05584	0.964831	0.907692	0.981571	1.11018	1.09441		-0.0897842	0.982932	0.00221299		0.852209	1.37619	0.821385						0.060761
A6NIL9	CRYM-AS1	2	1	1	1.32536	1.97963	1.53554	1.486	1.33241	0.724977	0.0184717	1	1.0542	1.28642	0.873564	1.18909	1.25748	0.921463	0	1	1.23153	0.966266	0.982889	0.819973	0.334155	0.364774	0.0276869	1	1.2721	0.969289	0.729716	1.29248	1.01789	1.17774	0	18.1688	-1.4144	0.0184709	0.318269	18.3162	-1.91354	0	0.829021	14.351	-0.123146	0	0.921918	19.844	0
A6NJ78	METTL15	14	10	1	1.04352	1.00044	0.81022	0.345173	0.109396	0.0837211	0.059379	1	0.996252	0.978451	0.764125	0.298594	0.101965	0.0540431	0.0455504	1	0.979707	0.920438	0.717796	0.303497	0.126752	0.0782884	0.0544371	1	0.987341	0.985342	0.753315	0.305208	0.122605	0.0758626	0.0447222	10.83	-0.180845	0.029346	0.998061	10.4968	-0.182233	0.0102067	0.999629	10.3383	-0.158253	0	0.995974	10.4964	-0.173497
A6NKB5	PCNXL2	1	1	1	0.85109	0.883068	0.885524	0.663348	1.04126	0.754945	0.262919	1	0.874411	0.974093	1.0197	0.731136	1.05788	1.08269	0.347495	1	0.865982	0.962513	1.05299	1.29675	1.1165	1.17775	0.381516	1	0.729816	0.957022	1.04898	1.0643	1.85132	1.71206	0.432226	18.2244	-1.18624	0.262919	0.613025	20.9018	0	0	0.764096			0.977358	0.000711161		0.851246
A6NKD9	CCDC85C	8	6	1	0.965044	0.987197	0.87838	0.557281	0.355371	0.219461	0.125602	1	1.12839	1.11183	0.953936	0.605964	0.417942	0.244692	0.185732	1	0.998718	1.10644	0.982119	0.627681	0.389486	0.218671	0.134037	1	1.00012	1.00049	0.954116	0.639394	0.385837	0.221365	0.15872	12.7766	-0.105201	0	0.997545	13.4116	-0.109904	0.102336	0.969256	13.4343	-0.117813	0.0523085	0.986068	13.442	-0.114368
A6NKF1	SAC3D1	3	1	1	0.999001	0.951805	0.82796	0.39889	0.191487	0.100544	0.0828607	1	0.999659	1.05808	1.07738	0.651264	0.408527	0.286922	0.155931	1	0.975552	1.04322	0.882173	0.421291	0.21005	0.142141	0.0886049	1	0.929445	0.991721	0.940957	0.476928	0.429685	0.252378	0.172754	11.2192	-0.15317	0.0333574	0.998264	13.6554	-0.128018	0.149277	0.978342	11.4915	-0.165434	0.0789658	0.997368	12.5261	-0.121804
A6NKX4	SLC22A31	1		1	0.785066	1.0021	0.997452	0.345537	0.325475	0.336249	0.0876754									1	1.01248	1.2647	0.849728	0.679416	0.290739	0.394731	0.244269									11.2451	-0.331448	0.246585	0.913469					13.273	-0.108948	0.212712	0.900585
A6NKZ8		4	1	1	0.649736	0.491222	0.46652	0.257511	0.078981	0.0445066	0.0502727	1	0.722477	0.548846	0.510268	0.273072	0.148898	0.112572	0.107162	1	0.873867	0.673052	0.544857	0.238306	0.0944576	0.0827381	0.0564029	1	0.828925	1.2206	0.575477	0.151961	0.178626	0.106979	0.144016	4.58824		0	0.866462	5.62024	-0.162024	0	0.893529	7.97211	-0.142307	0	0.948372	9.17205	-0.45626
A6NNH0	GATSL1	1		1	0.982351	1.02379	0.825263	0.511471	0.414523	0.17671	0.051375									1	0.990154	1.14159	0.844394	0.5247	0.312728	0.258424	0.173305									12.402	-0.108502	0	0.980882					12.233	-0.119354	0.131048	0.977881
A6NNL5	C15orf61	2	1	1	0.991767	0.900645	0.83229	0.326386	0.204971	0.211856	0.154266	1	0.970417	0.943412	0.755559	0.28968	0.0827403	0.0492611	0.0487972	1	0.990705	0.940802	0.772258	0.37204	0.283694	0.213492	0.211401	1	0.99751	0.861453	0.627362	0.256785	0.0781717	0.0591032	0.0580564	10.692	-0.207355	0.172456	0.989241	10.4122	-0.18575	0.00773032	0.996774	10.8179	-0.15631	0.193698	0.995772	9.63835	-0.161738
A6NNY8	USP27X	1	1	1	1.30849	1.29429	1.00451	0.561426	0.344343	0.20626	0.145917	1	1.19873	1.34121	0.693432	0.539424	0.363546	0.0397152	0	1	0.943116	0.965519	0.721492	0.386302	0.226436	0.132708	0.0935189	1	1.10108	1.25302	1.16471	0.342305	0.381258	0.187559	0.0609887	12.7188	-0.148693	0.14278	0.88162	11.7459	-0.124271	0	0.879197	10.8332	-0.125236	0	0.996752	11.5604	-0.50702
A6NP81			1									1	0.775286	0.923609	0.739958	0.481907	0.39245	0.0803634	0.0212592									1	0.97898	0.941557	0.790035	0.574836	0.376366	0.175839	0.0510089					11.572	-0.115172	0	0.906129					12.4329	-0.107703
A6QL63	BTBD11	2	2	1	0.971401	1.00993	0.875658	0.525664	0.262267	0.191652	0.169486	1	1.05842	1.05873	1.02578	0.544885	0.389385	0.234818	0.197972	1	1.06272	1.01139	0.937133	0.569769	0.233172	0.161996	0.146656	1	1.07028	1.13752	0.931672	0.606152	0.330639	0.201643	0.138506	12.104	-0.136226	0.11474	0.998369	12.6561	-0.155431	0.21258	0.981186	12.383	-0.16966	0.117617	0.995921	12.961	-0.125346
A6ZKI3	FAM127A	5		1	1.04678	1.00912	0.808217	0.374141	0.161477	0.0926338	0.0674671									1	0.968754	0.93358	0.801028	0.360814	0.166061	0.104295	0.0608832									11.0093	-0.161284	0.0274625	0.998231					10.9309	-0.157691	0.0247553	0.995953
A7E2V4-4	ZSWIM8	8	7	1	1.09781	1.07578	0.788012	0.38383	0.158467	0.097817	0.0973895	1	0.98052	0.924735	0.760765	0.328287	0.181973	0.120533	0.106785	1	0.933956	0.901446	0.760863	0.328494	0.150659	0.0861043	0.0686386	1	0.998681	0.989482	0.778303	0.335749	0.181407	0.118453	0.0895094	10.949	-0.160712	0.0471567	0.988007	10.5976	-0.16326	0.0740999	0.9954	10.6181	-0.157818	0.0171231	0.989193	10.7141	-0.166657
A7KAX9	ARHGAP32	14	9	1	1.02388	1.09254	0.907623	0.580912	0.308015	0.19891	0.14893	1	1.03194	1.03191	0.938995	0.592789	0.385244	0.195811	0.16138	1	1.00798	1.04078	0.941634	0.605644	0.311858	0.178885	0.119619	1	1.01071	1.09662	0.982442	0.640035	0.379949	0.193799	0.126588	12.681	-0.126823	0.0837972	0.991406	13.1272	-0.114523	0.060787	0.995104	12.8915	-0.131877	0.0562538	0.998311	13.4242	-0.121974
A7MBM2	DISP2	4	1	1	0.938977	1.00486	0.904148	0.764923	0.776472	1.10405	1.04968	1	1.02794	0.861311	0.897433	0.527565	0.459902	0.54632	0.163488	1	1.12398	1.13575	1.03173	0.806154	0.870713	1.08442	0.90434	1	1.17207	0.989439	0.890136	0.716465	0.537967	0.358414	0.280001		-0.262723	0.919854	0.0571618	14.1768	-0.069409	0	0.880527		-0.0383729	0.919435	0.249326	15.2531	-0.0728025
A8CG34	POM121C	1	12	1	0.870644	0.958477	0.886842	0.289757	0.0653554	0.0778335	0.0367005	1	1.00519	0.96177	0.816255	0.396025	0.237034	0.18024	0.140741	1	1.01433	0.790607	0.633699	0.263814	0.107727	0.0314716	0.0334186	1	0.979135	0.96472	0.760607	0.363539	0.222827	0.171607	0.134647	10.8515	-0.240603	0.0383624	0.985667	11.147	-0.152438	0.121348	0.998576	9.52868	-0.153907	0	0.973071	10.7767	-0.150496
A8K2U0	A2ML1	7	1	1	0.792001	9.19757	0.714932	0.560754	3.97918	0.448925	0.865468	1	0.704447	0.512513	0.462931	0.26638	1.51191	1.63767	0.564447	1	0.828028	1.09418	1.13953	0.731432	0.929036	0.70023	0.703397	1	0.590626	0.713938	0.727763	0.484697	1.07609	1.10701	1.62407		1.8995	1.5	-0.0483137			0.808615	0.0179483		-0.481481	0.766023	0.567905
A8K855	EFCAB7	4	3	1	0.960423	1.13104	0.882009	0.429305	0.230342	0.191541	0.158288	1	1.025	1.04637	0.905111	0.436867	0.242241	0.190986	0.136106	1	0.908525	0.947393	0.728337	0.344295	0.201854	0.10079	0.0577555	1	0.974247	0.87844	0.738724	0.443381	0.248846	0.164737	0.110964	11.4632	-0.171949	0.151628	0.983738	11.6039	-0.171467	0.141964	0.996712	10.6323	-0.139227	0	0.990708	11.1146	-0.112377
A8K8P3	SFI1	1		1	0.95576	0.937777	0.62842	0.253818	0.150336	0.0715504	0.0510346									1	1.01746	0.886204	0.658135	0.190818	0.136967	0.0696879	0.089889									9.78612	-0.15536	0	0.997055					9.70524	-0.214116	0.0699797	0.989509
A8MPS7	YDJC	3	8	1	0.931654	0.825289	0.762965	0.508251	0.42909	0.422349	0.297856	1	0.926203	1.03057	0.940511	0.676479	0.754614	0.802439	0.644632	1	0.989664	0.976695	0.942216	0.626524	0.554764	0.418752	0.293096	1	1.00625	1.04805	0.902889	0.688136	0.711785	0.725391	0.574826	13.0252	-0.0691785	0	0.962666		-0.761737	0.719541	0.856242	15.3209	-0.0695425	0.0591795	0.982389		-0.092404
A8MSI8	LYRM9	1		1	0.966739	0.981044	0.816578	0.702567	0.743542	0.803345	0.681955									1	0.98738	1.05376	1.04931	0.751914	0.839647	0.817572	0.623231										-0.68372	0.732852	0.913708						-0.0267044	0	0.762596
A8MT69	STRA13	2	1	1	1.24471	1.06743	1.24909	0.975037	1.1767	1.20407	0.864581	1	1.86365	1.63797	2.13882	1.28884	2.53029	2.26312	2.45029	1	0.976775	1.04391	1.11063	1.0146	0.855326	0.921192	0.598184	1	1.02032	1.02675	0.847861	1.04793	1.17	1.29826	1.49268			1.22332	0.076859			1.5	-0.470728		-0.100219	0	0.808591		0.069397
A8MVW0	FAM171A2	2	1	1	1.08248	1.0174	0.8779	0.697955	0.561939	0.379756	0.233852	1	1.00877	1.1142	0.871559	0.501855	0.261888	0.121676	0.0650204	1	0.988453	0.903993	0.971687	0.586652	0.437587	0.366588	0.254865	1	1.03777	0.95994	0.910102	0.49237	0.25725	0.168852	0.0709106	15.1915	-0.0736922	0	0.980581	12.0639	-0.134249	0	0.98892	13.3469	-0.117119	0.268887	0.975478	12.09	-0.139372
A8MWD9		10	10	1	0.997026	1.02223	0.936188	0.726607	0.75133	0.864241	0.688214	1	1.04183	1.07993	0.86336	0.703515	0.626822	0.636833	0.64023	1	1.03804	1.1007	0.979872	0.774985	0.841377	0.792374	0.573008	1	1.12367	1.12905	0.959951	0.723136	0.604192	0.60883	0.589874		-0.627609	0.757598	0.862048		-0.0863963	0.629291	0.965695		-0.0301725	0	0.820094		-0.0972726
A8MWY0	KIAA1324L	4		1	0.960352	1.07415	0.929118	0.705995	0.705759	0.563016	0.35234									1	1.07282	1.13539	1.0158	0.737269	0.768969	0.503713	0.294146									18.3121	-0.053049	0	0.936769					17.707	-0.0682102	0	0.911058
A8MXV4	NUDT19	12	9	1	1.07861	1.15468	1.00689	0.765715	0.511779	0.23938	0.179135	1	1.00153	1.09194	0.985911	0.704554	0.500609	0.0686654	0.0186366	1	1.06157	1.06059	0.985509	0.71512	0.458928	0.188662	0.136097	1	1.07801	1.08012	0.989956	0.803585	0.517686	0.0812472	0.0198739	14.7973	-0.107982	0.0198541	0.967522	14.0064	-0.143287	0	0.969282	14.1622	-0.114818	0	0.989348	14.6117	-0.164828
A8MYB1	TMCO5B		1									1	0.857447	0.84011	0.747408	0.349944	0.14466	0.0358871	0.0436208									1	0.850262	0.92141	0.901065	0.492869	0.226932	0.0408361	0					10.5915	-0.156558	0	0.960105					11.9623	-0.16333
A9UHW6-3	MIF4GD	6	3	1	1.05492	1.12471	1.03348	0.773841	0.551569	0.265885	0.120446	1	1.1218	1.22839	1.16004	0.819267	0.661449	0.325701	0.090115	1	1.00412	1.02739	1.01485	0.756123	0.538306	0.232975	0.102856	1	1.08933	1.1091	1.10551	0.830555	0.64409	0.300065	0.0983075	15.0581	-0.111553	0	0.974407	15.9866	-0.122361	0	0.909258	14.798	-0.115486	0	0.990227	15.8419	-0.123626
B1AK53	ESPN	13	14	1	0.989338	0.984476	0.904478	0.576039	0.446589	0.487806	0.382689	1	1.0347	1.08668	0.953116	0.696068	0.804871	0.97472	0.966767	1	1.03489	1.06051	0.936739	0.591919	0.456254	0.385587	0.318631	1	0.991921	1.06664	0.946705	0.727292	0.738941	0.839774	0.829173	13.4328	-0.124716	0.415688	0.989799		-0.352488	0.860606	0.445413	13.4637	-0.113631	0.321166	0.989285		-0.593192
B2RTY4-4	MYO9A	5	4	1	1.01822	1.03431	0.767204	0.347125	0.191262	0.185436	0.139728	1	0.949053	0.975731	0.811789	0.371908	0.223224	0.171315	0.0439485	1	0.918276	0.858913	0.682357	0.319589	0.163599	0.121213	0.0956215	1	1.00162	0.973838	0.769805	0.382935	0.230125	0.139155	0.0797561	10.6302	-0.173687	0.135227	0.997825	11.1391	-0.14367	0.0370257	0.992212	10.132	-0.131621	0	0.981612	11.0414	-0.132482
B3EWG4	FAM25B	2	1	1	0.882603	3.14764	0.910773	0.610277	1.05679	0.739384	0.648961	1	0.939752	0.880125	0.807621	0.511964	0.453208	0.288018	0.240764	1	0.864311	0.989349	1.03104	0.825291	0.803932	0.714192	0.53383	1	0.919291	0.912736	0.788463	0.566382	0.439862	0.349105	0.206548		-0.659297	0.763852	0.0220166	12.8406	-0.0786916	0	0.974416		-0.0399155	0	0.843169	13.1647	-0.0770071
B4E2M5	ANKRD66	1		1	0.926038	0.963477	0.858884	0.439561	0.134398	0.109227	0.0574516									1	1.14195	1.13925	0.983209	0.388281	0.180464	0.121235	0.0670567									11.4436	-0.16429	0.0200276	0.992785					11.522	-0.246789	0.101171	0.973479
B5MCY1	TDRD15	2		1	0.656109	0.614085	0.579626	0.294437	0.321452	0.33369	0.33907									1	1.02365	0.989584	0.849066	0.785939	0.501057	0.712514	0.836472									6.35314		0	0.879054						-0.0874519	0.700205	0.699606
B5ME19	EIF3CL	82		1	0.993974	0.953415	0.787669	0.356013	0.0887543	0.0377013	0.0268973									1	0.987412	0.971568	0.776946	0.351783	0.0975143	0.0404433	0.0311151									10.7749	-0.177933	0	0.996995					10.728	-0.174436	0	0.998143
B9A064	IGLL5	1		1	0.639959	5.49791	0.688508	0.650296	1.48855	0.50331	0.500346									1	1.01007	1.22987	0.963602	0.752612	0.723605	0.770078	0.59555										-0.677679	0.7662	-0.040986						-0.0719525	0.68124	0.767702
C9JI98	TMEM238	1	2	1	1.03697	1.02989	0.865632	0.442345	0.185279	0.0998512	0.0244908	1	1.04476	1.18868	0.824922	0.469729	0.621332	0.696837	0.501095	1	0.897578	0.892232	0.771406	0.420617	0.192422	0.0964265	0.0400935	1	0.985557	0.933926	0.88211	0.482452	0.471345	0.421922	0.320012	11.5806	-0.155124	0	0.997685		-1.18881	0.572248	0.855545	11.0758	-0.138804	0	0.980146	12.1396	-0.147856
C9JLW8	FAM195B	11	7	1	0.898796	0.925229	0.898883	0.74863	0.966316	1.22605	1.10486	1	0.984862	1.0322	0.987604	0.770005	1.09361	1.39671	1.42307	1	0.962239	0.976337	0.959087	0.924175	1.14557	1.11124	1.11617	1	0.981185	0.913468	0.893191	0.835994	0.97175	1.13586	1.16162			0.966966	0.00654968		0.163099	1.42065	0.84002		0.0637297	1.12626	0.786727
C9JTQ0	ANKRD63	1	1	1	0.668916	0.94113	0.826497	0.320853	0.0836609	0	0.140576	1	1.06037	0.987961	0.774652	0.373415	0.135787	0	0	1	0.734492	0.80273	0.759087	0.303063	0.0804378	0.100808	0	1	1.03486	1.03203	0.852647	0.391035	0.137699	0.0408974	0.0570153	10.7307	-0.207764	0.0453167	0.891552	10.8247	-0.172117	0	0.992988	10.4491	-0.173333	0	0.897177	11.2237	-0.174706
E7EW31	PROB1	1		1	1.02237	1.03912	0.942122	0.47574	0.585085	0.611131	0.485879									1	1.22094	1.25398	1.00185	0.55646	0.632016	0.530775	0.390326										-1.2474	0.539459	0.963672						-0.243549	0.515816	0.818854
O00115	DNASE2	8	9	1	1.03786	1.03928	0.997265	0.876801	1.04695	1.312	1.12812	1	0.994255	1.02488	0.914654	0.805171	1.02542	1.2737	1.30764	1	1.00313	1.0422	0.998358	0.929198	1.08948	1.01056	0.904728	1	0.990241	1.0471	0.946064	0.876043	1.00504	1.15261	1.24428		0.527204	1.22006	0.681536		0.115809	1.30897	0.771783			0	0.376566		0.0807352
O00116	AGPS	44	39	1	1.03697	1.02843	0.868599	0.448684	0.189151	0.0982703	0.0793888	1	1.02192	1.0215	0.8313	0.439831	0.175347	0.0686026	0.0365288	1	1.01341	0.999385	0.842154	0.420332	0.178645	0.0856297	0.0626079	1	1.03373	1.01467	0.847382	0.429321	0.16548	0.0810192	0.0443712	11.59	-0.156913	0.0308622	0.998156	11.4157	-0.154775	0	0.998378	11.3757	-0.15385	0.00800433	0.999794	11.4207	-0.15724
O00124	UBXN8	4	2	1	1.01947	1.03661	0.836142	0.484589	0.204565	0.0713456	0.0354876	1	0.98554	0.997095	0.785188	0.426545	0.170312	0.111021	0.0575567	1	1.00193	1.03796	0.848014	0.451892	0.228494	0.0881018	0.0450862	1	0.984334	1.06068	0.820054	0.407184	0.178062	0.10362	0.0504697	11.6898	-0.148172	0	0.99641	11.1841	-0.141918	0	0.998853	11.637	-0.144086	0	0.997738	11.2595	-0.151053
O00139-2	KIF2A	22		1	1.00804	0.940207	0.709347	0.283512	0.101847	0.065944	0.0511812									1	0.966514	0.911735	0.668918	0.270511	0.109804	0.0792259	0.0547786									10.2192	-0.171431	0.00625229	0.997846					9.98474	-0.160276	0	0.994925
O00139-4	KIF2A		12									1	1.00329	0.91774	0.692026	0.27936	0.0904048	0.0419717	0.00892323									1	0.999625	0.96081	0.726968	0.299865	0.0971617	0.052117	0.0248575					10.1078	-0.177193	0	0.995467					10.3476	-0.175019
O00142	TK2	6	3	1	1.00866	0.989044	0.960612	0.706103	0.589261	0.399356	0.186535	1	0.987698	1.06861	0.919601	0.675679	0.643789	0.470462	0.199094	1	1.00648	1.03452	0.980235	0.749077	0.629466	0.37097	0.2083	1	1.0195	1.07431	0.946286	0.669172	0.553852	0.426449	0.216413	15.474	-0.0805706	0	0.981067	15.9593	-0.0702531	0	0.945007	15.8566	-0.0843556	0	0.984535	15.318	-0.0748206
O00148	DDX39A	19	12	1	1.16633	1.21994	1.05766	0.596679	0.322698	0.231505	0.165377	1	1.06218	1.13588	0.978551	0.524059	0.195281	0.0756777	0.0519889	1	1.06757	1.04332	0.897247	0.492864	0.280482	0.170913	0.111996	1	1.04438	0.99958	0.954437	0.488669	0.179069	0.07421	0.0408754	12.7292	-0.178712	0.190168	0.937268	12.1914	-0.188794	0.0353735	0.984944	12.0792	-0.137489	0.0731151	0.993599	11.9808	-0.184587
O00151	PDLIM1	25	24	1	0.94465	1.07589	0.936029	0.775432	0.927449	1.07253	0.869623	1	0.996906	1.0892	0.986711	0.828409	1.13525	1.29187	1.25856	1	1.01009	1.01858	0.981408	0.850863	0.997236	0.921872	0.739219	1	1.00009	1.02056	0.982712	0.885564	1.03092	1.10266	1.05914		-0.178952	0.911258	0.221776		0.625052	1.27522	0.768655			0	0.664079		0.0526579
O00154-7	ACOT7		37									1	1.00746	1.00854	0.86524	0.691563	0.584115	0.340198	0.101371									1	1.02037	1.01454	0.899302	0.727195	0.548725	0.311461	0.119052					14.7493	-0.0880641	0	0.960908					14.7971	-0.0948994
O00154	ACOT7	37		1	1.03538	1.03365	0.934391	0.718169	0.535065	0.233671	0.0752896									1	1.01513	0.993886	0.903988	0.67991	0.52205	0.214162	0.0696679									14.4915	-0.110524	0	0.982033					14.1157	-0.107764	0	0.978364
O00159	MYO1C	52	47	1	1.01188	0.950401	0.726492	0.294476	0.0833309	0.0415291	0.0274859	1	1.04453	0.956246	0.743137	0.333748	0.11479	0.0762391	0.0593739	1	1.02032	0.953261	0.724197	0.285833	0.0897474	0.0495497	0.0316834	1	1.01738	0.983428	0.762839	0.322673	0.122307	0.0704248	0.050668	10.3112	-0.179955	0	0.997976	10.5475	-0.161449	0.00376842	0.996967	10.2864	-0.178619	0	0.998357	10.5982	-0.169886
O00161	SNAP23	13	14	1	0.987018	0.914052	0.916916	0.825679	0.903707	1.00862	0.821167	1	0.947409	1.02457	0.896272	0.766702	0.928699	1.06666	1.00384	1	1.00617	1.0126	0.971518	0.843839	0.944252	0.836645	0.682772	1	0.981837	1.03757	0.898381	0.821795	0.895288	0.977205	0.835356		-0.0361505	0.891489	0.370533						-0.024857	0	0.806623		-0.26812
O00165	HAX1	5	5	1	0.987491	0.945617	0.876282	0.47647	0.367697	0.2494	0.113541	1	0.995658	0.904538	0.77708	0.358216	0.141584	0.0562312	0.0347119	1	0.999995	1.03446	0.890449	0.510629	0.344596	0.209461	0.117954	1	1.00351	0.980438	0.81308	0.384778	0.141985	0.0599157	0.0280414	12.4348	-0.10247	0	0.986966	10.7896	-0.160721	0	0.993396	12.4657	-0.11459	0.0380422	0.995076	11.0588	-0.164813
O00170	AIP	32	24	1	1.00219	1.04625	0.968928	0.786009	0.886594	0.852387	0.335014	1	1.00496	1.09236	0.958902	0.798979	0.992113	1.07052	0.44476	1	1.05941	1.04124	1.00346	0.822727	0.89719	0.697251	0.289063	1	1.03016	1.04659	0.980674	0.874501	0.926584	0.913285	0.440123	20.04	-0.184171	0	0.83623	20.9718	0	0.00125464	0.822192	19.2654	-0.128661	0	0.916457	20.6771	-0.188432
O00178	GTPBP1	19	19	1	1.03238	1.06827	0.903772	0.567182	0.313353	0.161409	0.0882989	1	0.98981	0.994039	0.835859	0.528168	0.327082	0.182951	0.0899624	1	1.0304	1.02527	0.89357	0.528707	0.309967	0.206406	0.0825531	1	1.00605	0.994109	0.882596	0.561178	0.319268	0.169459	0.0823669	12.6647	-0.122773	0	0.994508	12.2954	-0.112041	0	0.997866	12.4889	-0.116822	0	0.995832	12.5862	-0.119117
O00180	KCNK1	3	4	1	1.13236	1.21068	1.15906	0.820205	0.706101	0.52445	0.290231	1	1.11616	1.27206	1.22053	0.843506	0.803288	0.603912	0.309315	1	1.13844	1.32592	1.24128	0.963492	0.784617	0.474646	0.239613	1	1.15652	1.22114	1.17839	0.93204	0.824459	0.555624	0.329802	17.6958	-0.0766815	0	0.869089	18.6901	-0.0825675	0	0.793125	17.7076	-0.110805	0.000897348	0.815711	18.6328	-0.09129
O00186	STXBP3	13	11	1	1.02053	0.969926	0.813679	0.387618	0.138753	0.0561967	0.038242	1	0.986518	1.01872	0.856478	0.42287	0.154922	0.0582077	0.0505757	1	1.00908	0.970057	0.795915	0.371713	0.139578	0.065003	0.0424739	1	0.989752	0.984262	0.829787	0.393522	0.15322	0.0727541	0.0436146	11.066	-0.164498	0	0.998743	11.4024	-0.164489	0	0.999209	10.938	-0.161643	0	0.999258	11.1812	-0.160943
O00189	AP4M1	8	4	1	1.34877	1.0362	0.820151	0.431498	0.202816	0.116039	0.0728116	1	0.978655	0.934137	0.7719	0.37649	0.185853	0.128208	0.0478763	1	1.07353	1.02281	0.897969	0.445513	0.204037	0.121897	0.0753197	1	0.982088	0.982232	0.830114	0.377179	0.172365	0.0943469	0.064389	11.4055	-0.141783	0.0119406	0.925266	10.9372	-0.139715	0	0.996199	11.6671	-0.163863	0.054755	0.995286	11.1098	-0.163285
O00192	ARVCF	15	14	1	1.06736	1.09216	0.891823	0.506624	0.290697	0.249137	0.186843	1	0.997879	0.96809	0.800472	0.363672	0.162194	0.12065	0.0909684	1	1.04039	1.01583	0.848853	0.462903	0.295547	0.236727	0.150826	1	0.999903	0.988415	0.827058	0.373352	0.165262	0.110693	0.0526387	12.0654	-0.142211	0.175478	0.986958	10.8929	-0.165229	0.0610403	0.999214	11.7874	-0.131139	0.13219	0.996116	11.0798	-0.163686
O00193	SMAP	12	10	1	1.2897	1.15874	1.00046	0.991441	1.13469	1.35008	1.23374	1	0.956758	0.99389	1.01152	0.819945	1.02602	1.29149	1.32544	1	0.881759	0.89759	0.817758	0.934228	0.963681	0.928475	0.852346	1	1.05927	1.01545	0.892221	0.857162	0.971434	1.10216	1.0394		0.64568	1.29191	0.151457		0.125125	1.3267	0.830551						-0.113477
O00194	RAB27B	5	1	1	0.919093	1.47071	1.00624	0.747984	1.02796	1.14801	0.877649	1	1.09089	1.20347	1.21463	0.762929	0.821841	0.957598	0.772117	1	1.06905	1.14314	1.08189	0.865821	1.03168	0.926572	0.74591	1	0.956954	1.35354	1.29002	0.787371	0.844603	0.951489	0.881216		0	0	0.0310893		-0.0725614	0.828743	0.461863		-0.371589	0.74591	0.570283		-0.0448132
O00203	AP3B1	65	51	1	1.01356	0.985935	0.795985	0.357284	0.100222	0.0421237	0.0337439	1	0.983813	0.949072	0.745364	0.337172	0.0887344	0.0333175	0.0276008	1	0.996033	0.940126	0.735948	0.323191	0.0976612	0.0523278	0.0364288	1	0.99492	0.966442	0.756015	0.342626	0.0956063	0.0458717	0.0317771	10.8331	-0.176192	0	0.998812	10.5253	-0.174318	0	0.996373	10.4525	-0.16979	0	0.997128	10.6058	-0.171964
O00204	SULT2B1	1		1	0.903059	13.5356	0.839244	0	0.689923	0.0872669	0.10713									1	0.889147	1.05869	1.13559	0.525329	0.212141	0.174187	0.128371									9.26589	-1.40018	0.221036	-0.0538153					12.0912	-0.34097	0.165523	0.97114
O00206	TLR4	2		1	0.816498	1.0543	0.748256	0.567679	0.60669	0.432582	0.3978									1	1.07732	1.15209	1.21176	0.983263	0.798896	0.613386	0.52941									15.1621	-0.0776	0.366468	0.868833						-0.083837	0.498146	0.829517
O00212	RHOD	4	5	1	1.01199	1.07448	0.860505	0.480822	0.196395	0.103871	0.0656522	1	0.998066	0.998723	0.809832	0.396054	0.216965	0.162051	0.140891	1	1.02476	1.10499	0.907814	0.466404	0.229632	0.1404	0.0817554	1	0.99739	0.980152	0.831237	0.467131	0.223985	0.140704	0.105307	11.7707	-0.145691	0.000631761	0.995154	11.0943	-0.155901	0.111981	0.999988	11.8413	-0.157806	0.0642284	0.990432	11.6359	-0.133738
O00213	APBB1	4	3	1	1.02458	1.00446	0.894395	0.561143	0.351653	0.242127	0.172877	1	0.965751	1.04022	0.853606	0.525132	0.391953	0.341234	0.205115	1	1.01976	1.02184	0.806141	0.522934	0.325634	0.228808	0.169185	1	1.03696	1.06213	0.945976	0.558988	0.333771	0.270994	0.211455	12.7585	-0.11199	0.0949192	0.998778	12.7022	-0.102347	0.169484	0.988269	12.2317	-0.103758	0.0437392	0.998211	12.57	-0.143585
O00214-2	LGALS8	7	9	1	0.990519	1.11306	0.924176	0.646285	0.425834	0.215092	0.0513679	1	0.961701	1.00619	0.876786	0.62729	0.489092	0.294504	0.0804116	1	1.03129	1.0742	0.994545	0.707333	0.469998	0.21315	0.078988	1	0.999503	0.99014	0.901018	0.677322	0.47047	0.28514	0.114009	13.5651	-0.114614	0	0.97992	13.7786	-0.0947868	0	0.97623	14.1782	-0.117813	0	0.98767	14.0698	-0.0970886
O00217	NDUFS8	11	12	1	0.963369	0.915118	0.802163	0.443747	0.188691	0.0773149	0.0479312	1	0.975764	0.895302	0.769012	0.417693	0.182833	0.0926703	0.0561924	1	1.00753	0.941951	0.793837	0.435776	0.195691	0.0904732	0.0563118	1	0.987217	0.951872	0.798036	0.429222	0.191515	0.112411	0.0706171	11.3137	-0.143903	0	0.99204	11.0393	-0.138974	0	0.990748	11.2703	-0.14018	0	0.996962	11.2744	-0.137561
O00219	HAS3	1	1	1	0.930052	0.96563	0.904891	0.435448	0.260378	0.143038	0.0880242	1	0.945471	1.01193	0.8675	0.406939	0.360641	0.410225	0.227183	1	0.881341	0.920315	0.802939	0.503159	0.26249	0.121867	0.0628057	1	0.992383	1.06641	0.90457	0.422524	0.290627	0.271591	0.193372	11.7243	-0.15427	0.0753445	0.991593	11.1075	-0.196475	0.321879	0.973793	11.7578	-0.12453	0	0.97782	11.4592	-0.182616
O00220	TNFRSF10A	8	9	1	1.02348	1.0059	0.959004	0.687171	0.712547	0.806507	0.702556	1	0.966839	1.04227	0.982784	0.758619	1.24118	1.38743	1.2152	1	1.05429	1.1182	1.04554	0.796147	0.788782	0.700966	0.603612	1	0.938129	0.958927	0.968294	0.789658	0.990603	1.08069	1.14996		-0.729593	0.727195	0.940628		0.638235	1.30132	0.719438		-0.0421281	0.539335	0.87819
O00221	NFKBIE	6	3	1	1.06977	1.12207	0.969939	0.787276	0.726301	0.618603	0.345625	1	1.11938	1.05709	0.97413	0.727866	0.702014	0.645307	0.355072	1	0.967042	1.06453	0.980912	0.8124	0.664725	0.525797	0.299955	1	1.0429	1.06811	1.13957	0.859502	0.768031	0.638711	0.408129	18.8815	-0.0569514	0	0.920493	19.1495	-0.0510138	0	0.899787	17.5117	-0.0679706	0	0.97678	19.6807	-0.0620159
O00231	PSMD11	60	68	1	1.03707	1.05099	0.900694	0.544568	0.173973	0.0373459	0.0193811	1	1.00821	1.02996	0.885234	0.555873	0.201286	0.0544853	0.0307342	1	1.00068	0.991803	0.880616	0.510371	0.156013	0.0420627	0.0227611	1	1.02521	1.01096	0.891862	0.55739	0.198958	0.0583916	0.0336174	12.1548	-0.178002	0	0.995055	12.2112	-0.162577	0	0.996415	11.8992	-0.173354	0	0.997467	12.2319	-0.163328
O00232-2	PSMD12	1	1	1	0.924919	0.853467	0.762961	0.516291	0.161578	0.0133027	0	1	0.979642	1.02621	0.820513	0.488131	0.198492	0.0256329	0	1	1.07954	1.01244	0.835408	0.479742	0.13347	0.0347509	0.0113381	1	0.913414	0.815651	0.723928	0.469553	0.174586	0.0499113	0.0486408	11.389	-0.150733	0	0.958574	11.6202	-0.156704	0	0.991341	11.5568	-0.169427	0	0.990832	10.9101	-0.134589
O00232	PSMD12	52	46	1	1.07127	1.03971	0.906882	0.569667	0.197255	0.0493169	0.0241983	1	1.00172	0.956672	0.870529	0.543564	0.188573	0.0427265	0.0251122	1	1.00064	0.991184	0.870613	0.524398	0.167582	0.0512145	0.0256286	1	1.02131	1.00948	0.896281	0.572774	0.201151	0.0518122	0.0255614	12.3284	-0.171762	0	0.993465	12.0822	-0.164187	0	0.994265	11.9528	-0.166304	0	0.996736	12.3286	-0.167988
O00233	PSMD9	24	19	1	0.939341	0.996877	0.904064	0.745085	0.948466	1.12731	1.00354	1	0.961067	0.980952	0.911565	0.786343	1.09875	1.40555	1.52341	1	1.02547	1.03642	1.0028	0.854536	1.0507	1.01433	0.909262	1	1.00363	1.00123	0.942038	0.889822	1.068	1.30991	1.28578		-0.149596	0.945694	0.00847906		0.135461	1.5	0.872437		-0.0403351	0.957258	0.179857		0.679606
O00244	ATOX1	6	8	1	0.99381	1.00638	0.9221	0.928507	1.03321	1.18782	1.24868	1	0.987039	1.04875	1.0036	0.847181	1.14919	1.43437	1.43643	1	0.936659	1.09593	0.968475	0.906252	1.06543	1.18726	1.09681	1	0.986522	1.03562	1.01725	0.905771	1.17275	1.31086	1.28013		0.062318	1.25893	0.882842		0.35713	1.43549	0.920164		0.0190636	1.15147	0.478482		0.7311
O00255	MEN1	3	4	1	0.935747	1.15329	0.76404	0.381967	0.223371	0.149107	0.09859	1	0.966029	1.00175	0.887275	0.446676	0.247623	0.240187	0.278338	1	1.01522	0.983316	0.842247	0.448136	0.254496	0.110458	0.083622	1	1.00486	1.03406	0.839376	0.463534	0.273915	0.248823	0.199496	10.9468	-0.14991	0.0781776	0.975392	11.444	-0.181606	0.237982	0.995769	11.6703	-0.131927	0	0.998688	11.6018	-0.142248
O00257	CBX4	9	5	1	0.994757	0.998293	0.813015	0.437868	0.297716	0.31846	0.258288	1	0.976557	0.958297	0.793106	0.332914	0.17592	0.149894	0.125474	1	1.05494	0.97308	0.774262	0.418078	0.3007	0.257682	0.20851	1	0.983834	0.972926	0.764959	0.338819	0.169047	0.124069	0.0909437	11.2569	-0.15411	0.264241	0.997874	10.6728	-0.181814	0.113295	0.99809	11.1794	-0.134392	0.190898	0.995687	10.6627	-0.163435
O00258	WRB	2	3	1	0.998567	0.933337	0.802431	0.428578	0.25051	0.217866	0.171168	1	0.94396	0.945482	0.807441	0.422196	0.24755	0.138812	0.0675441	1	1.01246	0.991768	0.811736	0.395521	0.266472	0.221212	0.14897	1	0.898694	1.00263	0.796649	0.409625	0.240981	0.132209	0.030556	11.2883	-0.137	0.136274	0.995732	11.4068	-0.1282	0	0.994162	11.1576	-0.149981	0.151562	0.997918	11.2992	-0.134596
O00264	PGRMC1	17	12	1	1.12752	1.12481	1.04816	0.885263	1.09023	1.28902	1.16952	1	0.981872	0.95106	0.967819	0.753802	0.935547	1.18991	1.19179	1	0.992535	1.01886	0.962133	0.831637	0.978109	0.918689	0.809764	1	0.905028	0.971468	0.912	0.757263	0.870487	0.987354	0.90672		0.489875	1.22927	0.456948		0.389954	1.19179	0.514951		-0.0108384	0.44551	0.53143		-0.0524806
O00267	SUPT5H	50	50	1	1.00471	1.01318	0.928689	0.647234	0.255015	0.078463	0.0460969	1	0.983629	1.04757	0.951155	0.64049	0.280212	0.0840648	0.040196	1	1.00467	1.02775	0.96569	0.664473	0.257193	0.0893473	0.052218	1	1.02355	1.03208	0.963773	0.702022	0.285526	0.0926825	0.0467979	12.8773	-0.16081	0	0.998374	12.9363	-0.156669	0	0.997139	13.0066	-0.164429	0.00211193	0.999264	13.2563	-0.163015
O00268	TAF4	14	9	1	1.00336	1.04284	0.959401	0.590551	0.341255	0.230435	0.166898	1	0.971588	0.983418	0.908387	0.536103	0.348169	0.213808	0.158577	1	1.01495	1.0248	0.926373	0.571661	0.324473	0.204727	0.144365	1	1.01969	1.01035	0.908179	0.578861	0.321243	0.195255	0.162328	12.8861	-0.133248	0.137499	0.99695	12.5829	-0.1191	0.0933982	0.997073	12.7235	-0.126392	0.0868866	0.998742	12.7065	-0.123875
O00273-2	DFFA	1		1	1.10395	1.11895	1.11105	0.781611	0.480373	0.549367	0.406493									1	1.05797	0.94124	0.939716	0.788081	0.615993	0.500264	0.255254									13.7208	-0.293007	0.477711	0.926728					16.7316	-0.069991	0	0.97082
O00273	DFFA	27	13	1	1.08242	1.10928	1.03093	0.875974	1.14485	1.22748	0.825036	1	1.00064	1.11614	1.02587	0.872549	1.03	1.13428	0.823019	1	1.03042	1.06698	1.01609	0.926134	1.10134	0.987163	0.656512	1	1.04539	1.07907	0.993011	0.854827	0.912935	1.00488	0.776023		-0.000232373	0.996101	-0.0857004		-0.0151022	0.966681	0.0541466		-0.199066	0.303406	0.839943		-0.29103
O00287	RFXAP	1	2	1	0.953866	1.13209	1.01783	0.753956	0.790258	0.926381	0.682243	1	1.05622	1.13631	1.19497	0.612184	0.986094	1.04575	0.948199	1	1.05458	1.10259	0.914947	0.693213	0.752954	0.713268	0.613229	1	0.839697	1.11901	1.09974	0.67566	0.719692	0.639716	0.521621		-0.197783	0.787384	0.681614		-0.0329344	0.911792	0.145812		-0.137267	0.690592	0.900955		-0.285265
O00291	HIP1	16	17	1	0.946171	0.959932	0.817359	0.446308	0.224029	0.110849	0.0800987	1	1.09181	1.12516	0.914087	0.534856	0.238775	0.108417	0.0589027	1	0.999609	1.04391	0.889083	0.483857	0.230858	0.137052	0.0861901	1	1.07436	1.10022	0.929375	0.505106	0.220304	0.111022	0.0743103	11.4932	-0.133426	0	0.996281	12.2759	-0.145721	0	0.983004	11.9049	-0.146777	0.0442637	0.998214	12.075	-0.161723
O00299	CLIC1	44	55	1	1.05003	1.05468	0.9624	0.843715	0.927335	0.589153	0.0395225	1	0.996649	1.09175	1.0177	0.896312	1.06867	0.930179	0.0834708	1	1.05072	0.998952	0.98052	0.876229	0.932186	0.533972	0.0433815	1	1.01599	1.03171	1.04312	0.926027	0.977118	0.804695	0.113558	18.2763	-0.305242	0	0.957142	18.5372	-1.1143	0.0834503	0.96833	18.0944	-0.270159	0	0.97476	19.1139	-0.300731
O00303	EIF3F	49	34	1	1.09523	1.10514	0.930019	0.534703	0.239565	0.0911083	0.0448842	1	1.02159	0.97379	0.885036	0.459722	0.205058	0.0558084	0.0316265	1	1.00024	1.03746	0.891139	0.509555	0.216736	0.0934265	0.0461488	1	0.692016	0.835636	0.908088	0.531257	0.220046	0.0701698	0.0290891	12.2965	-0.152495	0	0.9858	11.7296	-0.159406	0	0.998091	12.0292	-0.149693	0	0.998612	12.1673	-0.157512
O00308	WWP2	4	6	1	0.98505	1.03474	0.859449	0.460849	0.290926	0.145857	0.0752607	1	1.0255	0.953706	0.842164	0.476674	0.263	0.126573	0.0610302	1	0.969372	0.996339	0.820344	0.437791	0.214842	0.135959	0.085357	1	0.960583	1.00794	0.867046	0.516814	0.256035	0.136692	0.0919984	11.9199	-0.125548	0	0.995979	11.8162	-0.129561	0	0.996983	11.4485	-0.137252	0.0230477	0.999116	12.1154	-0.128235
O00311	CDC7	6	5	1	0.972336	0.987207	0.775852	0.373848	0.14555	0.0839862	0.0326956	1	1.02811	1.07071	0.925733	0.479842	0.262058	0.211351	0.219859	1	0.978078	0.905937	0.744454	0.315637	0.135413	0.0617931	0.0319471	1	0.959347	1.03604	0.852944	0.449489	0.262527	0.151153	0.0811359	10.8808	-0.15606	0	0.998905	11.8345	-0.177792	0.199726	0.994363	10.4956	-0.162831	0	0.993832	11.7356	-0.133333
O00327	ARNTL	2	4	1	0.977754	0.98768	0.807572	0.471154	0.255288	0.185257	0.151168	1	1.04126	1.08389	0.785041	0.441523	0.284461	0.136166	0.104045	1	1.01111	0.968571	0.839236	0.403009	0.236121	0.180582	0.0698377	1	1.11945	1.11806	1.02211	0.448533	0.246385	0.173692	0.0542478	11.6197	-0.125293	0.0765436	0.999232	11.5379	-0.122229	0.0105664	0.989564	11.37	-0.143673	0.0607916	0.995636	11.8729	-0.214272
O00329	PIK3CD		4									1	1.01895	1.05817	0.981609	0.441442	0.282655	0.274477	0.223412									1	0.99757	1.12428	0.958725	0.518261	0.29338	0.261187	0.212577					11.6834	-0.246125	0.252219	0.994975					12.1548	-0.177851
O00330	PDHX	22	21	1	0.982631	0.980155	0.907769	0.720047	0.744065	0.555416	0.0975991	1	1.00002	0.996589	0.923065	0.739565	0.808268	0.669168	0.0510272	1	1.02176	1.02917	0.952569	0.817157	0.802293	0.497881	0.102516	1	1.01821	1.03142	0.939763	0.757763	0.738488	0.593121	0.121882	16.8748	-0.0838643	0	0.862255	18.5426	-0.293646	0	0.846617	17.4549	-0.134023	0	0.943717	17.3067	-0.0871003
O00391	QSOX1	6	2	1	0.911941	2.34153	0.822946	0.459573	0.619405	0.504359	0.400872	1	1.28444	0.894932	0.722394	0.463609	0.457491	0.434238	0.402403	1	1.00324	1.04267	0.871093	0.573215	0.522898	0.478537	0.3248	1	0.970377	0.859898	0.837669	0.511817	0.476389	0.437121	0.387892					12.6373	-0.0904635	0.340134	0.882201	14.5039	-0.083635	0.320356	0.974688	14.4834	-0.0639605
O00399	DCTN6	12	12	1	1.02795	1.22014	1.01479	0.791204	0.909093	0.945545	0.654498	1	1.00993	1.03419	0.969382	0.748779	0.913857	1.00719	0.868635	1	0.975375	1.01644	0.954486	0.778307	0.868994	0.732307	0.522445	1	0.981657	1.05975	0.993897	0.825704	0.85127	0.86619	0.770094		-0.0229906	0	0.495944		-0.299976	0.884614	0.448015		-0.0356173	0	0.860612		-0.593846
O00400	SLC33A1	6	7	1	1.06246	1.09047	0.912154	0.458764	0.194868	0.0746144	0.0357635	1	1.05304	1.12874	1.00493	0.515998	0.180589	0.0409771	0.0162839	1	1.02889	1.02693	0.859187	0.407707	0.201538	0.0708128	0.0384424	1	1.12954	0.950329	0.982257	0.506582	0.196904	0.0821793	0.0397695	11.8005	-0.16419	0.00146194	0.991409	12.1779	-0.198243	0.00432138	0.986313	11.4222	-0.156463	0	0.997832	12.1234	-0.186893
O00401	WASL	15	18	1	1.01228	1.07134	0.941219	0.735094	0.81078	0.656105	0.265938	1	0.991128	1.00315	0.95774	0.779945	0.92335	0.793353	0.257271	1	1.05287	1.0532	1.01692	0.840583	0.887747	0.618468	0.263876	1	1.0648	1.0183	0.960449	0.853991	0.892078	0.727783	0.29083	18.7261	-0.0639822	0	0.852366	19.5476	-0.194279	0	0.875918	18.7696	-0.119099	0	0.943028	19.4048	-0.138755
O00408	PDE2A		3									1	0.953664	0.898618	0.799304	0.60864	0.27515	0.0869051	0.027998									1	0.979678	0.999481	0.838545	0.646535	0.283955	0.10093	0.0686808					12.3409	-0.131891	0	0.971235					12.7679	-0.133973
O00410-2	IPO5		102									1	1.02052	1.07762	0.977879	0.765533	0.655651	0.414486	0.0652641									1	0.798583	0.893284	0.977235	0.7817	0.593787	0.349793	0.0675375					15.9427	-0.102246	0	0.949043					15.4447	-0.107948
O00410-3	IPO5	128		1	1.09098	1.13942	1.04518	0.793067	0.608116	0.318682	0.0710292									1	1.05279	1.05831	0.979423	0.756122	0.577231	0.277567	0.0708893									15.5236	-0.115644	0	0.95652					15.0448	-0.112331	0	0.977599
O00411	POLRMT	50	29	1	0.972941	0.919449	0.703068	0.265687	0.113484	0.0864412	0.0613847	1	0.983008	0.956572	0.711031	0.295473	0.114466	0.103498	0.0546229	1	0.986562	0.909414	0.664603	0.242659	0.113463	0.0752826	0.0563241	1	0.980606	0.904052	0.68977	0.275696	0.10724	0.115429	0.0642888	10.1205	-0.177096	0.0310417	0.995229	10.2649	-0.168578	0.0260395	0.9982	9.89006	-0.170619	0.0139254	0.995231	10.0777	-0.167555
O00418	EEF2K	15	11	1	0.985094	0.961095	0.795712	0.382576	0.120015	0.0574681	0.040877	1	0.975984	0.976902	0.813968	0.387464	0.177484	0.0610928	0.0398784	1	0.999478	0.98815	0.817786	0.385544	0.134869	0.0703595	0.0478002	1	0.99312	1.00708	0.814867	0.398451	0.162645	0.0766211	0.0452654	10.9485	-0.165023	0	0.997897	11.1224	-0.156484	0	0.998738	11.0789	-0.163399	0	0.999658	11.1626	-0.15585
O00422	SAP18	6	4	1	0.992953	0.942896	0.720641	0.393283	0.192705	0.075956	0.0333579	1	0.941601	0.948993	0.725857	0.360819	0.175239	0.0852026	0.0343021	1	0.924007	0.884536	0.704739	0.360864	0.169555	0.0846851	0.0488582	1	0.961798	0.931781	0.728464	0.344033	0.173695	0.100927	0.0597909	10.734	-0.140397	0	0.995744	10.6305	-0.145633	0	0.995109	10.4597	-0.140275	0	0.985775	10.5837	-0.142607
O00423-3	EML1	6	7	1	1.04913	1.1889	0.885514	0.552778	0.345239	0.226653	0.0921525	1	1.04262	1.0351	0.888245	0.505638	0.290521	0.144301	0.0392931	1	1.06768	1.07188	0.900504	0.532286	0.318646	0.181808	0.0757943	1	1.03025	1.04764	0.87436	0.498556	0.296986	0.15743	0.0492775	12.7668	-0.110921	0	0.964726	12.2039	-0.131223	0	0.994572	12.5191	-0.120493	0	0.989502	12.1636	-0.126529
O00425	IGF2BP3	27	15	1	0.996426	0.939471	0.762016	0.3613	0.131499	0.0392644	0.028746	1	0.984029	0.952374	0.770471	0.378466	0.155047	0.0654399	0.0426509	1	1.00636	0.964363	0.766749	0.353986	0.126619	0.0550025	0.0328828	1	0.969817	0.938429	0.712223	0.34368	0.134884	0.0535823	0.0406946	10.7249	-0.163723	0	0.996369	10.869	-0.153835	0	0.997925	10.7281	-0.164385	0	0.998751	10.4422	-0.15586
O00429-2	DNM1L	59		1	0.942096	0.912275	0.781059	0.376586	0.148782	0.0683483	0.053114									1	1.00638	1.01095	0.854799	0.428494	0.168571	0.0824969	0.0616429									10.8907	-0.154119	0	0.991415					11.4361	-0.158842	0.0109886	0.999708
O00429	DNM1L		49									1	0.984707	0.981718	0.806282	0.415774	0.160821	0.0408887	0.0228697									1	0.971529	0.95604	0.821415	0.420889	0.168499	0.065435	0.0319273					11.1725	-0.160072	0	0.997422					11.2722	-0.155927
O00442-2	RTCA	20	15	1	1.04831	1.07231	0.880328	0.459934	0.171692	0.063139	0.0436781	1	0.98447	1.00986	0.837888	0.457969	0.257067	0.159431	0.105177	1	1.01481	0.981346	0.801939	0.438406	0.156147	0.0591684	0.040723	1	0.992073	0.96699	0.845916	0.471922	0.253961	0.135507	0.0877209	11.6761	-0.163638	0	0.994455	11.6957	-0.130989	0.0435331	0.999319	11.2503	-0.153864	0	0.997401	11.8109	-0.12749
O00443	PIK3C2A	24	25	1	1.19156	1.26544	1.01267	0.46667	0.244464	0.141673	0.108282	1	1.24774	1.28817	1.03938	0.463944	0.235077	0.137845	0.115145	1	1.18411	1.25972	0.998706	0.46726	0.230504	0.127861	0.0971392	1	1.24271	1.31022	1.03441	0.452099	0.242726	0.137197	0.10397	11.9258	-0.217399	0.132728	0.932365	11.9007	-0.251199	0.142917	0.914807	11.9227	-0.209047	0.113286	0.937439	11.8582	-0.242288
O00458	IFRD1	4	5	1	0.933577	1.00857	0.894054	0.517651	0.420503	0.306615	0.131839	1	1.02081	1.06986	0.936561	0.71361	0.73547	0.630249	0.148581	1	0.977924	1.01118	0.946237	0.602938	0.493471	0.30661	0.108375	1	1.03623	1.05565	0.904023	0.689983	0.669128	0.472992	0.194909	13.0775	-0.0930725	0	0.978144	17.374	-0.0709554	0	0.850746	13.9357	-0.09416	0	0.979147	16.1429	-0.0700348
O00459	PIK3R2	21	14	1	0.979745	0.988192	0.827127	0.461077	0.188866	0.133669	0.0929095	1	0.99223	0.940055	0.830563	0.461029	0.220286	0.23146	0.232871	1	0.972102	1.01837	0.933506	0.471028	0.210468	0.140332	0.105927	1	0.929092	0.942902	0.843126	0.451347	0.298306	0.273408	0.135593	11.5205	-0.140667	0.0263293	0.998558	11.3952	-0.15238	0.188158	0.991856	11.8419	-0.178406	0.0962895	0.998924	11.7654	-0.124672
O00461	GOLIM4	8	12	1	0.921075	0.868046	0.837157	0.68645	0.827936	0.996018	0.86944	1	1.02236	1.097	0.985212	0.787825	1.08075	1.34021	1.26288	1	0.962699	1.03307	1.00407	0.859664	0.979799	0.951095	0.821853	1	1.05133	1.11702	1.05356	0.860463	1.00873	1.11827	1.1238		-0.382741	0.8434	0.231002		0.826867	1.30154	0.716418		-0.0930719	0.903082	0.493542		0.0600637
O00462	MANBA	20	23	1	0.998475	0.963478	0.882936	0.600526	0.537907	0.553563	0.409881	1	1.00257	1.06352	0.930451	0.651122	0.683286	0.720003	0.602333	1	1.04005	1.01574	0.909488	0.635074	0.575192	0.449653	0.358101	1	1.02422	1.01431	0.943923	0.648978	0.596189	0.580547	0.534315	16.5698	-0.0904292	0.449061	0.974163		-0.868125	0.664186	0.952154	15.8333	-0.0680762	0.214322	0.984518		-0.114904
O00463	TRAF5	3	1	1	1.03429	1.04162	0.876527	0.487682	0.253777	0.154667	0.0740135	1	1.06459	1.15792	0.864566	0.424498	0.266848	0.099488	0.0357082	1	0.971654	0.995838	0.876726	0.508289	0.241321	0.123778	0.0714434	1	1.0462	1.05891	0.876737	0.404909	0.227764	0.108355	0.0986285	11.9922	-0.133495	0.0172478	0.996765	11.6726	-0.142465	0	0.975608	12.0515	-0.135544	0	0.999282	11.4202	-0.165612
O00468	AGRN	11	7	1	1.08931	1.11856	0.973924	0.659951	0.559902	0.312793	0.19134	1	1.05123	1.07896	0.930619	0.664386	0.508665	0.400141	0.232858	1	1.0098	1.02144	0.915412	0.567226	0.510367	0.257588	0.155732	1	0.997112	1.05323	0.896202	0.628939	0.526498	0.38693	0.218638	14.8048	-0.0867099	0	0.96155	14.9589	-0.0760883	0	0.980052	13.6858	-0.0909065	0	0.979464	14.6725	-0.0753093
O00469-2	PLOD2	11	7	1	0.985456	0.984252	0.873693	0.546248	0.284899	0.114868	0.0607228	1	0.966636	1.02429	0.835804	0.494785	0.24948	0.097765	0.0209675	1	0.988654	1.02578	0.912755	0.545686	0.271256	0.119592	0.0608586	1	1.00689	1.06232	0.894902	0.572455	0.253394	0.112993	0.0444943	12.3202	-0.13152	0	0.99786	11.8328	-0.138909	0	0.99482	12.4049	-0.137791	0	0.998868	12.4465	-0.142443
O00471	EXOC5	23	16	1	1.00199	0.951723	0.735805	0.28418	0.0798891	0.0490031	0.0327132	1	0.998162	0.956629	0.758007	0.335733	0.143558	0.11186	0.0878427	1	0.980584	0.963233	0.717592	0.267693	0.0919115	0.0525611	0.0339275	1	1.0058	0.993119	0.758241	0.324569	0.144568	0.121293	0.0828407	10.3222	-0.183027	0	0.998317	10.5996	-0.165618	0.0518319	0.998585	10.213	-0.181387	0.000728755	0.999036	10.5533	-0.172413
O00478	BTN3A3	2		1	0.95785	1.10274	1.08321	0.746668	0.636839	0.321008	0.150076									1	1.00418	1.08398	1.20001	0.864673	0.595426	0.251797	0.162049									15.6416	-0.100089	0	0.955723					15.5681	-0.129956	0.0480069	0.951693
O00479	HMGN4	4		1	1.10865	1.13433	0.928682	0.810171	0.765314	0.856459	0.548484									1	1.09355	0.916529	0.788514	0.637033	0.616079	0.447118	0.243838										-0.0292583	0	0.741358					15.2711	-0.0613111	0	0.936274
O00483	NDUFA4	10	14	1	1.02852	0.849683	0.823063	0.464911	0.196117	0.102897	0.062719	1	1.08467	1.02218	0.897649	0.500562	0.252155	0.1482	0.124948	1	0.983849	0.997757	0.829158	0.502124	0.210628	0.11293	0.0761745	1	0.93435	1.01155	0.76143	0.495158	0.24952	0.151217	0.104084	11.5057	-0.138208	0	0.980421	12.0187	-0.146292	0.0794839	0.993562	11.7787	-0.135011	0	0.99831	11.5865	-0.117188
O00487	PSMD14	23	23	1	1.00668	1.01053	0.873809	0.513756	0.197644	0.0674714	0.0460287	1	0.998332	0.932424	0.818492	0.550718	0.181566	0.0369821	0.0172603	1	1.00704	1.00287	0.885083	0.551859	0.203316	0.0755684	0.0491634	1	0.988111	0.97991	0.845178	0.563356	0.198264	0.0545581	0.0270509	11.9504	-0.154551	0	0.998415	11.918	-0.155756	0	0.985142	12.1919	-0.154819	0	0.998079	12.123	-0.15547
O00488	ZNF593	8	5	1	0.974666	0.91513	0.807711	0.515522	0.383664	0.263427	0.121891	1	0.998715	0.981187	0.840361	0.531683	0.417999	0.306463	0.139863	1	0.914687	0.958236	0.816395	0.554307	0.399533	0.239365	0.116999	1	0.95682	0.978502	0.845691	0.485797	0.363753	0.235824	0.101155	12.3934	-0.0943306	0	0.987212	12.9343	-0.089661	0	0.989899	12.6804	-0.0964599	0	0.983377	12.3236	-0.103752
O00499	BIN1	13	13	1	0.933611	0.98564	0.953485	0.746242	0.568903	0.285936	0.122614	1	0.992997	1.06179	0.96271	0.763371	0.707833	0.367506	0.202077	1	0.975102	1.04912	0.974948	0.828602	0.637112	0.248497	0.127486	1	1.03045	1.05138	1.00001	0.817255	0.660995	0.348547	0.190725	15.0103	-0.10189	0	0.981692	16.3021	-0.0881397	0	0.964126	15.6436	-0.122108	0	0.985523	16.1619	-0.0980263
O00505	KPNA3	13	10	1	0.988707	0.997547	0.866347	0.471999	0.193935	0.0626375	0.0398401	1	0.997756	0.982434	0.822825	0.463601	0.192147	0.052614	0.0259488	1	1.01734	0.994301	0.867438	0.437579	0.181695	0.0734969	0.0390922	1	0.966785	0.978973	0.831752	0.449928	0.190414	0.0754065	0.0323365	11.7135	-0.155899	0	0.999009	11.5009	-0.152033	0	0.996692	11.5453	-0.15853	0	0.999637	11.4811	-0.150522
O00506	STK25	7	6	1	0.977669	0.913224	0.713397	0.268933	0.079546	0.0384017	0.0315506	1	0.901435	0.837026	0.698447	0.266766	0.0514904	0.0107611	0.0215314	1	0.952856	0.903537	0.693299	0.271172	0.0875405	0.0587357	0.0295804	1	0.942847	0.857316	0.68869	0.274104	0.0773064	0.0355332	0.0255428	10.1699	-0.183365	0	0.994684	10.0476	-0.189749	0	0.971411	10.0884	-0.174152	0	0.992361	10.0396	-0.176572
O00507	USP9Y		1									1	0.896188	0.785241	0.76934	0.533159	0.376876	0.172561	0.0428781									1	0.75737	0.817986	0.854917	0.724505	0.600837	0.279292	0.0832754					11.9172	-0.103742	0	0.919267					14.8302	-0.0984917
O00512	BCL9	16	15	1	0.936297	1.12485	0.904424	0.743437	0.930718	1.01848	0.768973	1	1.02712	1.0969	0.997965	0.786725	0.983341	1.12149	1.07079	1	1.06263	1.10471	1.04098	0.880485	1.03787	0.947655	0.757425	1	0.956855	1.05333	0.972732	0.780768	0.876727	0.963209	0.879724		-0.365637	0.865401	0.362041		0.0299621	1.09937	0.215231		-0.298128	0.757424	0.642594		-0.33353
O00515	LAD1	34	25	1	0.980807	1.08912	0.890928	0.5781	0.322996	0.206147	0.141295	1	1.00053	1.0106	0.867307	0.566596	0.302416	0.144161	0.0982338	1	1.01597	1.00766	0.875632	0.577434	0.320619	0.196777	0.133339	1	1.01396	1.01331	0.874242	0.583204	0.316319	0.162796	0.11351	12.7382	-0.116858	0.0511804	0.991565	12.4964	-0.121052	0	0.998826	12.7233	-0.110433	0.00387539	0.999533	12.6772	-0.116517
O00519	FAAH	4	5	1	0.956322	0.888085	0.716109	0.35323	0.138907	0.0572811	0.0420266	1	1.05989	1.10145	0.778696	0.487608	0.237589	0.161281	0.117198	1	0.943708	0.935499	0.758561	0.404526	0.148055	0.0741259	0.0363495	1	0.958622	1.00483	0.70709	0.368914	0.217883	0.153547	0.0998121	10.4655	-0.151715	0	0.989041	11.6281	-0.122664	0.0220862	0.985524	10.8982	-0.149676	0	0.992698	10.6624	-0.134722
O00522	KRIT1	6	3	1	1.04457	0.994317	0.83801	0.410165	0.180887	0.123554	0.0831568	1	1.03364	0.991265	0.814133	0.338098	0.0958275	0.00784566	0.0158309	1	0.9674	1.01225	0.877367	0.388735	0.20478	0.112288	0.0697446	1	1.0182	1.01396	0.818553	0.349779	0.0959705	0.0279956	0.0212164	11.2811	-0.157554	0.0490879	0.998313	10.8231	-0.19111	0	0.997959	11.3308	-0.171029	0.0613035	0.997872	10.8905	-0.186752
O00534	VWA5A	5	7	1	1.17996	2.8054	1.03676	0.738142	0.651096	0.320543	0.192121	1	1.00348	1.03952	1.00121	0.697975	0.58289	0.225961	0.126296	1	0.995497	1.02679	0.993822	0.775072	0.613992	0.285818	0.202191	1	0.994179	1.06328	1.00176	0.808693	0.622049	0.292851	0.13486	15.7596	-0.0939259	0	0.279164	14.7404	-0.105058	0	0.975302	15.546	-0.096321	0	0.987752	15.6347	-0.110521
O00541	PES1	26	20	1	1.03875	1.01382	0.885348	0.523808	0.247006	0.0798986	0.0663528	1	1.03972	1.00368	0.842291	0.53296	0.26059	0.0968825	0.0519718	1	0.987965	0.988738	0.841844	0.502816	0.247653	0.0920507	0.0540228	1	0.998161	0.981668	0.875883	0.546959	0.276993	0.109054	0.0624816	12.1354	-0.143097	0	0.997375	12.0733	-0.134333	0	0.995567	11.8865	-0.136578	0	0.997801	12.3072	-0.133455
O00559	EBAG9	3	7	1	0.777573	0.914654	0.802457	0.572221	0.557739	0.470099	0.335217	1	0.986016	1.05222	0.879313	0.706956	0.801785	0.871994	0.689212	1	0.959669	0.991495	0.904595	0.745261	0.698175	0.447617	0.278094	1	0.990133	0.984598	0.937832	0.736505	0.77707	0.788658	0.679301	15.3831	-0.0584888	0	0.842273		-0.588796	0.767487	0.80537	16.8251	-0.0667303	0	0.962018		-0.654292
O00560-2	SDCBP	1	1	1	0.916705	1.42694	0.79357	0.653741	0.64356	0.671668	0.496659	1	1.0632	1.24558	1.09121	0.980228	0.910728	1.46266	0.600439	1	1.07411	1.17699	1.03001	0.647192	0.659772	0.665723	0.352474	1	0.961423	0.745109	0.859958	0.658503	0.68302	0.715829	0.477124		-0.147656	0.611571	0.650472		0	0	0.327956	18.8107	-0.0521287	0.0793173	0.827979		-0.0456765
O00560	SDCBP	14	10	1	0.982767	1.03108	0.89318	0.70273	0.755254	0.733559	0.407064	1	0.945887	1.04665	0.957639	0.721016	0.953539	0.997736	0.586862	1	1.03629	1.08946	0.994297	0.727852	0.784717	0.643908	0.364945	1	1.01304	1.08124	0.999889	0.761825	0.842346	0.861339	0.569049		-0.0391707	0	0.836842		-0.0191192	0	0.338955	19.6319	-0.051836	0	0.888146		-0.0280321
O00562	PITPNM1	9	13	1	0.985771	0.954334	0.897895	0.504304	0.238074	0.123394	0.0711944	1	1.03099	1.09034	0.916451	0.581415	0.270311	0.0822485	0.0222492	1	0.977565	1.04968	0.94162	0.537751	0.260472	0.125174	0.085023	1	0.974423	0.983056	0.876169	0.544447	0.253427	0.0979009	0.0325689	12.0735	-0.140605	0.00902916	0.998106	12.5594	-0.151391	0	0.9911	12.3585	-0.14976	0.0414907	0.997013	12.2308	-0.142175
O00566	MPHOSPH10	10	8	1	0.967554	0.907341	0.654062	0.240541	0.101201	0.0749371	0.043399	1	0.996602	0.985649	0.717971	0.271534	0.118132	0.0895732	0.0472232	1	0.951952	0.90075	0.640187	0.215627	0.101067	0.0751129	0.0580544	1	0.982092	0.961645	0.692677	0.230146	0.115423	0.0882516	0.0765395	9.83189	-0.167846	0	0.994529	10.2193	-0.182143	0.0333987	0.999712	9.69629	-0.179089	0.0202825	0.99224	9.94178	-0.206846
O00567	NOP56	16	18	1	1.01227	0.986552	0.699376	0.26467	0.126089	0.102121	0.0701358	1	0.976101	0.900626	0.669453	0.263095	0.164048	0.162572	0.159825	1	0.974848	0.91014	0.659083	0.243079	0.117097	0.0885246	0.066313	1	0.966664	0.897104	0.65568	0.248829	0.150997	0.150765	0.13211	10.0963	-0.186452	0.0572045	0.999726	9.87297	-0.193583	0.136717	0.990964	9.85676	-0.171649	0.0277824	0.994778	9.79973	-0.186453
O00571	DDX3X	47	29	1	0.937475	0.916135	0.657023	0.226005	0.0644752	0.0440042	0.0348724	1	0.956536	0.886619	0.666739	0.231295	0.0663046	0.0475333	0.0424935	1	0.96879	0.908034	0.654047	0.231221	0.0770006	0.051187	0.037726	1	0.969902	0.912615	0.657192	0.215201	0.074284	0.0574678	0.0473945	9.80773	-0.188091	0	0.992788	9.8493	-0.183955	0	0.990141	9.80462	-0.180687	0	0.994487	9.77986	-0.192591
O00584	RNASET2	12	15	1	1.01782	1.05207	1.06264	0.867144	1.10111	1.2274	0.979517	1	0.987121	1.03758	0.982106	0.826743	0.987015	1.17187	1.09606	1	1.01814	1.0221	0.994329	0.834147	1.06073	0.92612	0.757518	1	1.06588	1.10156	1.07598	0.922881	0.984853	1.05827	1.03806		0.169451	1.04831	0.0331159		0.057207	1.0169	0.010503		-0.326035	0.757518	0.586986		0.0315541
O00592	PODXL	9	7	1	0.986104	0.992134	0.972777	0.810002	1.08832	1.26488	1.03457	1	0.979492	0.969231	0.919296	0.910991	1.18081	1.46115	1.52859	1	1.0825	1.11692	1.0265	1.01553	1.26641	1.08286	0.969385	1	1.03288	0.987303	0.984265	0.948195	1.14752	1.3073	1.38235		0.294741	1.14972	0.439418		0.166546	1.5	0.959828			1.11257	0.0918518		0.0813468
O00623	PEX12	2	1	1	0.954842	1.03571	0.777602	0.38476	0.203275	0.176685	0.0960373	1	0.938007	0.842525	0.677323	0.256189	0.0520544	0.00684284	0.0135056	1	1.02403	1.05487	0.798151	0.348394	0.175547	0.143345	0.0745604	1	1.00718	0.954608	0.623078	0.291254	0.0744434	0.0401199	0.0327561	10.9682	-0.1489	0.0802169	0.995257	9.92425	-0.190087	0	0.978325	10.8391	-0.169707	0.0733435	0.996022	9.81133	-0.169637
O00625	PIR	32	21	1	1.00966	1.03658	0.987687	0.842222	0.939187	1.03257	0.816356	1	0.985597	1.03754	0.943733	0.822618	1.01946	1.16646	1.05228	1	1.03464	1.02768	0.95287	0.849096	0.928383	0.825203	0.627932	1	0.981384	1.0134	0.972536	0.891777	0.965987	1.04585	0.91053		-0.238748	0.907584	0.397564		0.251718	1.10937	0.361444		-0.0341282	0	0.831887		-0.108998
O00628	PEX7	2	1	1	1.30359	1.25433	1.00563	0.721762	0.612405	0.620429	0.474186	1	1.00506	1.03423	0.963091	0.646833	0.726277	0.924358	0.783595	1	1.06904	1.06766	0.938442	0.543192	0.537662	0.445412	0.38494	1	1.04906	0.890007	0.95299	0.803612	0.689718	0.660727	0.657798		-0.0926623	0.535428	0.752077		-0.628671	0.770266	0.717601	13.2715	-0.142491	0.436588	0.969372		-0.0296414
O00629	KPNA4	18	18	1	1.06668	1.0933	0.984628	0.747066	0.467123	0.142058	0.0615943	1	0.998585	1.05314	0.938962	0.611918	0.408127	0.131673	0.0606441	1	1.00416	1.05494	0.926414	0.713827	0.446259	0.131492	0.0589582	1	1.04269	1.0392	0.967657	0.677332	0.41828	0.129395	0.0569468	14.1962	-0.135215	0	0.983093	13.2172	-0.124394	0	0.988687	13.8776	-0.130537	0	0.98774	13.629	-0.131794
O00635	TRIM38	3	3	1	0.92615	0.995249	0.787975	0.312021	0.0709164	0.0314401	0.0232019	1	0.991696	1.00347	0.805009	0.450194	0.306043	0.210652	0.133797	1	1.00343	0.972663	0.767584	0.311443	0.085776	0.0401532	0.0238171	1	0.952317	1.03824	0.790046	0.485209	0.234591	0.176014	0.173331	10.613	-0.192702	0	0.995299	11.6958	-0.116772	0.0649163	0.998042	10.5424	-0.183804	0	0.999068	11.5501	-0.128272
O00716	E2F3	2	4	1	0.87156	0.941201	0.834888	0.507597	0.33393	0.163725	0.0623703	1	0.924587	0.954533	0.829168	0.452494	0.228301	0.12181	0.0368134	1	0.94445	0.960269	0.88982	0.591531	0.356724	0.18917	0.0912389	1	0.979962	0.990607	0.825741	0.505695	0.263895	0.16453	0.0726707	12.1448	-0.115582	0	0.974488	11.5718	-0.136968	0	0.992246	12.9107	-0.113081	0	0.993467	11.9427	-0.121712
O00743-3	PPP6C	26	15	1	1.02133	0.887726	0.834175	0.612015	0.751021	0.959088	0.790548	1	0.964644	0.967359	0.802962	0.623165	0.774294	1.0636	1.1196	1	1.00761	0.986426	0.850963	0.666158	0.784626	0.813027	0.683457	1	0.975138	0.98725	0.797191	0.628625	0.744507	0.948154	0.964949		-0.0986699	0.787757	0.525696		-0.330924	0.876725	0.0954322		-0.565377	0.736817	0.878488		-0.496378
O00746	NME4	1		1	0.95541	0.936815	0.832322	0.592738	0.471775	0.473455	0.265961									1	0.768051	0.889204	0.833202	0.53918	0.540155	0.310911	0.185845									14.5366	-0.0655341	0	0.971531					13.4905	-0.0773948	0	0.857497
O00748	CES2	3	1	1	1.01481	1.41861	1.09061	0.815844	0.89931	0.731839	0.272613	1	1.22055	1.43757	1.25468	0.974801	1.28133	1.42283	0.089388	1	1.0765	1.00583	1.00911	0.772783	0.854393	0.637224	0.219843	1	1.12036	1.15775	1.07481	0.882801	1.01128	0.962918	0.173007	19.357	-0.151866	0	0.705868	20.7865	0	0	0.577795	18.6038	-0.119343	0	0.890565	19.7482	-0.405204
O00750	PIK3C2B	8	6	1	1.15523	1.15293	0.963688	0.564662	0.315218	0.156143	0.107309	1	0.979699	0.987344	0.778167	0.327731	0.122799	0.0856052	0.0532124	1	1.03933	1.10558	0.876662	0.482366	0.270222	0.180981	0.0964573	1	0.988174	1.03203	0.751902	0.313307	0.135007	0.0816809	0.0670095	12.6902	-0.139517	0.0609691	0.963709	10.6648	-0.173475	0.0240579	0.999436	11.9751	-0.135074	0.0609856	0.988048	10.5112	-0.174713
O00754	MAN2B1	15	14	1	0.988131	1.12001	0.978382	0.810513	0.943367	1.10119	0.942225	1	0.982266	1.06154	0.926442	0.690473	0.813409	0.99786	0.915389	1	1.01945	1.05892	1.04863	0.806372	0.921096	0.843561	0.685595	1	1.01369	0.978612	0.890782	0.781881	0.763013	0.930755	0.796314		-0.118242	0.949325	0.137124		-0.364239	0.854283	0.432649		-0.0241389	0	0.745593		-0.47239
O00762	UBE2C	15	13	1	1.01161	0.990211	0.991795	0.80801	0.878426	0.803907	0.511246	1	1.00314	1.09237	1.00191	0.839344	0.930339	0.913323	0.586061	1	1.00568	1.05953	1.05441	0.840827	0.891743	0.669877	0.426657	1	1.0383	1.09339	0.956981	0.876405	0.87146	0.848803	0.536372		-0.0439959	0	0.830686		-0.125022	0	0.772294	20.1731	-0.0726351	0	0.924625		-0.0609189
O00763	ACACB	23	20	1	0.944256	0.931601	0.758736	0.344349	0.126924	0.0542363	0.0255613	1	0.99327	0.950155	0.765826	0.340061	0.0894562	0.0506617	0.038943	1	0.973731	0.955725	0.769519	0.344579	0.14562	0.0564736	0.0350217	1	0.948891	0.943077	0.737822	0.322649	0.110188	0.0463533	0.0388706	10.6498	-0.164622	0	0.994004	10.632	-0.173466	0	0.99721	10.7287	-0.161974	0	0.998117	10.471	-0.168388
O00764	PDXK	17	16	1	1.05803	1.11751	1.01727	0.852522	1.00919	1.19402	1.02168	1	0.938509	0.888847	0.824534	0.687874	0.858019	1.07917	1.09854	1	1.06217	1.0113	0.948564	0.779539	0.90051	0.816377	0.704833	1	0.967362	0.936677	0.855064	0.720231	0.773505	0.924698	0.938376			1.07721	0.0190939			0.906164	0.0596751		-0.0193038	0	0.791601		-0.105863
O00767	SCD	16	13	1	1.08185	0.995522	0.812842	0.371813	0.108514	0.0376633	0.0243378	1	0.960198	0.891251	0.750837	0.329525	0.0988247	0.0146868	0.0131034	1	0.99637	0.942244	0.745771	0.30445	0.0988835	0.042987	0.0252179	1	0.948856	0.936285	0.739257	0.333694	0.119211	0.0321921	0.0113561	10.9636	-0.177191	0	0.994642	10.5141	-0.177157	0	0.988551	10.4365	-0.177363	0	0.997728	10.5114	-0.169562
O14492	SH2B2	2	1	1	0.952035	0.875295	0.716151	0.417477	0.220372	0.0659822	0.017195	1	2.34527	1.32965	1.12449	0.868317	0.495221	0.519143	0.175745	1	0.958249	0.929109	0.83553	0.506301	0.183141	0.0916725	0.0553638	1	1.08806	1.28743	1.11512	0.712221	0.495105	0.242097	0.182728	10.7767	-0.134841	0	0.979928	16.1883	-0.0902589	0.0201594	0.366052	11.7466	-0.144522	0	0.991732	14.4526	-0.116129
O14494	PPAP2A	3	1	1	1.07216	0.988794	0.972021	0.749332	0.901653	0.845657	0.528191	1	1.10831	1.04209	1.09194	0.942459	1.15498	1.14843	0.831471	1	0.939906	1.10391	1.05037	0.82755	0.951124	0.772282	0.487978	1	1.02996	0.995438	1.04724	0.830576	0.90459	0.892852	0.724477		-0.0306225	0	0.694601			1.09134	0.02099	20.9693	-0.0891213	0	0.83208		-0.0192191
O14495	PPAP2B	2		1	1.00215	1.24505	1.00408	0.742632	0.926449	0.752979	0.341411									1	0.964738	0.915774	0.891227	0.748869	0.781105	0.518167	0.300167									19.7598	-0.132898	0	0.747514					17.9383	-0.0606623	0	0.893635
O14497	ARID1A	43	35	1	0.957411	0.968902	0.835757	0.516836	0.321313	0.165321	0.081993	1	1.00738	0.974105	0.839938	0.524916	0.330477	0.181181	0.0956273	1	0.992	0.986065	0.868326	0.554414	0.338468	0.170657	0.0855387	1	1.00323	0.995904	0.848968	0.52378	0.308215	0.173442	0.101738	12.184	-0.115045	0	0.995199	12.299	-0.111448	0	0.997794	12.5623	-0.115261	0	0.997698	12.2663	-0.114841
O14508	SOCS2	2		1	0.8716	0.874481	0.847157	0.44582	0.178013	0.114858	0.0910949									1	0.962957	1.00656	1.00578	0.648898	0.232938	0.153153	0.100339									11.4732	-0.149101	0.0300683	0.969269					12.7864	-0.197939	0.103389	0.998079
O14519	CDK2AP1		1									1	0.982838	0.991736	0.75349	0.666534	0.950115	1.29968	1.03373									1	1.1442	0.994454	0.997608	0.872353	0.798759	0.717466	1.03209						-0.181189	0.940709	0.0185691						-0.280937
O14521	SDHD	2	2	1	1.36176	1.11486	1.07915	0.822584	0.710136	0.315552	0.0987101	1	1.09108	1.19299	1.12917	0.807123	0.800632	0.424575	0.0966511	1	0.978025	1.14449	1.07099	0.92997	0.453216	0.272615	0.0928158	1	1.00785	1.07275	0.957398	0.825696	0.587316	0.340592	0.148633	16.2401	-0.129497	0	0.866056	17.1176	-0.140042	0	0.904772	14.8952	-0.161168	0.0912701	0.970817	15.6664	-0.10229
O14523-2	C2CD2L	6	2	1	0.95239	0.977831	0.76883	0.464099	0.222208	0.115375	0.0601088	1	0.953527	0.929502	0.853556	0.490973	0.262849	0.113518	0.045555	1	1.02319	1.01812	0.825563	0.493934	0.247346	0.137879	0.0503987	1	0.972554	0.876483	0.737239	0.413791	0.250476	0.146918	0.0598033	11.3558	-0.12959	0	0.995606	11.9069	-0.133553	0	0.992276	11.8213	-0.129824	0	0.997563	10.9658	-0.120272
O14524	TMEM194A	2	2	1	1.05191	0.994075	0.87364	0.544057	0.353472	0.292419	0.239751	1	1.07302	1.19868	0.963469	0.726186	0.503358	0.618463	0.376259	1	0.987119	0.971338	0.843397	0.573466	0.367767	0.261371	0.221758	1	1.17631	1.36789	1.02529	0.643974	0.471427	0.499468	0.337949	12.5234	-0.116539	0.200208	0.996524	17.0726	-0.089332	0.437822	0.880854	12.8533	-0.0963451	0.0796981	0.999112	13.646	-0.158041
O14526	FCHO1	2	2	1	0.97402	1.19816	0.864304	0.605746	0.419181	0.158509	0.0403258	1	0.923298	0.907387	0.769136	0.420187	0.207863	0.0826102	0.0151459	1	0.948348	1.14691	1.02952	0.623549	0.475012	0.17466	0.0371761	1	0.998517	0.9176	0.742828	0.406062	0.217943	0.0851508	0.0284758	13.0786	-0.116422	0	0.953591	11.0848	-0.141075	0	0.985015	13.7233	-0.122259	0	0.958084	10.9194	-0.136623
O14530	TXNDC9	14	9	1	0.984281	1.10365	0.980884	0.749159	0.745029	0.66703	0.297582	1	0.980177	1.03168	0.93798	0.71437	0.751901	0.739887	0.355806	1	0.975451	1.04655	0.997431	0.802368	0.766758	0.57737	0.279036	1	0.994931	1.04139	0.982529	0.821847	0.734535	0.680689	0.384638	18.8502	-0.0577538	0	0.877532	20.8744	-0.0442852	0	0.825393	18.177	-0.0731154	0	0.946398	19.9302	-0.0529925
O14531	DPYSL4	5	5	1	0.953148	0.962997	0.850298	0.529638	0.30973	0.184797	0.154499	1	1.00548	1.11439	0.957196	0.569039	0.333073	0.203446	0.132688	1	0.992188	1.05057	0.907475	0.560053	0.370449	0.220304	0.143028	1	0.998691	1.06074	0.95229	0.583674	0.312689	0.207036	0.146505	12.2947	-0.112311	0.0348116	0.996358	12.7682	-0.132964	0.0964336	0.986294	12.8985	-0.109368	0.0398859	0.994981	12.739	-0.139116
O14544	SOCS6	5	9	1	0.989785	0.979492	0.918664	0.474971	0.269408	0.176604	0.122688	1	0.997152	1.03897	0.832838	0.424322	0.173253	0.12115	0.0810504	1	0.961199	1.01418	0.810649	0.43294	0.217306	0.133523	0.106547	1	1.0498	1.05557	0.868902	0.46887	0.180716	0.108605	0.0682459	11.9421	-0.153597	0.111781	0.998187	11.3307	-0.154877	0.0394107	0.998191	11.3675	-0.139393	0.0443771	0.998251	11.6909	-0.154076
O14545	TRAFD1	9	2	1	1.01071	1.01704	0.890433	0.507522	0.333833	0.239641	0.151447	1	0.972458	1.19512	0.911649	0.525718	0.422753	0.242485	0.211115	1	1.00678	1.03605	0.885993	0.561273	0.360946	0.218878	0.144501	1	1.08273	1.13132	1.0918	0.562489	0.338378	0.295118	0.209982	12.3232	-0.12215	0.115245	0.996837	12.7498	-0.116206	0.168502	0.952778	12.8393	-0.106206	0.0204972	0.997427	12.3478	-0.245722
O14548	COX7A2L	7	8	1	0.995556	0.925118	0.863555	0.49395	0.264889	0.151284	0.0886783	1	1.0202	0.977246	0.874189	0.535845	0.290529	0.166438	0.097301	1	0.989217	1.03729	0.936289	0.551689	0.292168	0.150818	0.0972209	1	1.00578	1.04255	0.8329	0.560123	0.309025	0.17088	0.101857	12.0103	-0.124598	0	0.995242	12.351	-0.119913	0	0.999214	12.5304	-0.136823	0.0403744	0.997909	12.4015	-0.113957
O14561	NDUFAB1	6	6	1	1.22509	1.24077	1.41428	0.876194	1.02088	1.22652	1.27083	1	1.00671	1.04389	0.970535	0.689594	1.08626	1.19377	0.924489	1	0.792767	1.12722	1.09084	0.763183	0.807481	0.833496	0.838609	1	0.926964	0.934548	0.8924	0.675162	0.67847	0.744817	0.577478		0.0912969	1.27363	-0.358333		-0.0717724	0.972929	0.0185685		-0.0995715	0.806709	0.492947		-0.0433167
O14562	UBFD1	20	22	1	0.943347	0.983213	0.918316	0.764724	0.842351	0.759595	0.340547	1	0.986027	1.03742	0.940367	0.747277	0.893238	0.870497	0.407436	1	0.990296	1.00976	0.959178	0.830766	0.892988	0.670465	0.292416	1	1.00881	1.03363	0.981879	0.82716	0.864724	0.793792	0.409959	20.0588	-0.0652114	0	0.764893	20.4315	-0.163014	0	0.730007	19.1491	-0.118248	0	0.926392	20.4099	-0.0916702
O14578-3	CIT	2	2	1	0.917007	1.04423	0.897357	0.412957	0.162378	0.0907171	0.0863413	1	1.1057	1.23328	1.07401	0.489455	0.16757	0.0921521	0.0208424	1	0.964528	1.10785	0.920284	0.51535	0.153818	0.103196	0.0889999	1	1.00163	1.09583	1.03778	0.417965	0.112328	0.0525863	0.045562	11.4385	-0.185895	0.06071	0.993013	12.0241	-0.254529	0.0632716	0.957055	11.9944	-0.187278	0.0576701	0.989164	11.747	-0.330828
O14578-4	CIT	30	25	1	1.04476	1.04278	0.907141	0.461164	0.164942	0.105387	0.0783201	1	0.99591	1.01628	0.896682	0.463971	0.137557	0.0711488	0.0404757	1	1.0065	1.02171	0.916972	0.435396	0.166974	0.10808	0.0830094	1	0.99639	1.00718	0.896544	0.516298	0.149575	0.0783799	0.0444201	11.7075	-0.177405	0.0520257	0.996955	11.6963	-0.174862	0.00263415	0.999252	11.5985	-0.188035	0.0679781	0.99958	11.9635	-0.168585
O14579	COPE	19	17	1	0.955136	0.896772	0.854499	0.503693	0.187184	0.0853595	0.0478085	1	0.972003	0.909958	0.833167	0.552036	0.17105	0.0519731	0.0449168	1	1.0011	1.01207	0.942501	0.608668	0.238343	0.109846	0.0576858	1	0.979105	0.951492	0.833278	0.635027	0.212563	0.075292	0.0609361	11.8086	-0.148732	0	0.987828	11.9579	-0.154671	0	0.984161	12.6829	-0.155004	0.00641133	0.999719	12.5285	-0.149618
O14593	RFXANK	1	2	1	1.1963	1.20035	1.08716	0.610569	0.289634	0.0830387	0.0754887	1	0.990815	0.989714	1.10022	0.56559	0.405199	0.302529	0.397529	1	1.03142	0.972629	0.930156	0.472306	0.248486	0.0656785	0.0437348	1	1.11693	1.1154	0.931798	0.565729	0.507606	0.297813	0.166488	12.8603	-0.174529	0.0465112	0.943342	12.2776	-0.342847	0.367422	0.978305	11.9965	-0.154651	0	0.995613	13.881	-0.0883203
O14602	EIF1AY	1	2	1	1.11416	1.17456	0.978437	0.806231	0.926135	0.755537	0.406764	1	1.21629	1.24591	0.910166	0.784499	0.732774	0.587161	0.115592	1	0.882842	0.991407	0.985103	0.788346	0.874218	0.652527	0.341369	1	0.979722	1.06733	0.963274	0.818473	0.690251	0.471847	0.139396	20.1899	-0.105993	0	0.802191	17.3244	-0.0929077	0	0.809701	19.3389	-0.0813913	0	0.850401	16.7051	-0.0961657
O14613	CDC42EP2	3	2	1	1.01755	1.06229	0.959236	0.505758	0.405983	0.267463	0.171282	1	0.976998	1.09315	1.01231	0.706603	0.546881	0.382884	0.190563	1	0.920776	1.02854	0.917818	0.491388	0.352325	0.230973	0.166663	1	1.04686	1.26265	0.920762	0.636268	0.508639	0.408159	0.236252	12.6082	-0.128518	0.180927	0.98171	15.2798	-0.0851332	0	0.97376	12.2504	-0.133591	0.156231	0.98692	14.6982	-0.0805012
O14617-5	AP3D1	67	46	1	1.08285	1.01003	0.714571	0.262508	0.0841959	0.041774	0.0299612	1	0.986621	0.925772	0.625093	0.268452	0.106748	0.0847389	0.0606626	1	1.01547	0.927278	0.622569	0.208101	0.0744724	0.0460914	0.0300959	1	0.999195	0.923998	0.616387	0.251527	0.107416	0.0755531	0.0655874	10.1881	-0.187536	0	0.99527	9.75872	-0.156336	0	0.997774	9.62093	-0.186618	0	0.997527	9.67115	-0.158982
O14618	CCS	7	3	1	0.966235	0.9656	0.88735	0.660073	0.725223	0.766327	0.561024	1	0.937203	0.995004	0.913615	0.767517	1.01868	1.20518	1.11723	1	1.0115	1.03634	0.995777	0.765175	0.796923	0.679475	0.504638	1	1.01461	1.05054	1.03438	0.881378	1.03684	1.19297	1.05267		-0.966212	0.678162	0.856686		0.401211	1.16121	0.428829		-0.0394867	0	0.927122		0.147619
O14628	ZNF195		2									1	0.901507	0.991873	0.773465	0.351365	0.122222	0.0736253	0.0866638									1	1.15697	0.999904	0.775348	0.344405	0.168988	0.0978655	0.0570211					10.7175	-0.168829	0.0306263	0.990768					10.7829	-0.158442
O14639	ABLIM1	20	18	1	0.90908	1.67321	0.812775	0.620513	0.699705	0.663176	0.499997	1	1.01509	1.07379	0.957148	0.781938	0.897163	0.95867	0.842091	1	0.959389	1.00004	0.944418	0.800763	0.769317	0.694393	0.475941	1	1.01519	1.02854	0.95761	0.810647	0.778172	0.807996	0.693252		-0.278909	0.620711	0.483326		-0.339358	0.869965	0.644656		-0.040332	0	0.938488		-0.0456393
O14640	DVL1	10	6	1	1.00685	0.96717	0.76694	0.346131	0.164966	0.128007	0.0737035	1	1.14498	1.03297	0.800725	0.442806	0.305439	0.232608	0.198079	1	0.961361	0.903122	0.707663	0.307983	0.182086	0.113055	0.0644608	1	0.940131	0.977768	0.779682	0.392887	0.245969	0.19282	0.146648	10.7209	-0.15809	0.0466452	0.999016	11.46	-0.132217	0.169555	0.978668	10.3475	-0.139835	0	0.992794	11.0277	-0.143046
O14641	DVL2	15	15	1	0.957152	0.904568	0.709508	0.368391	0.165862	0.0961438	0.069843	1	1.03419	0.951255	0.768163	0.395611	0.169937	0.098986	0.0421874	1	0.930192	0.90026	0.72857	0.376884	0.168115	0.102007	0.068105	1	1.0176	0.959831	0.794996	0.375525	0.167292	0.0917447	0.0550302	10.5311	-0.13778	0	0.992839	10.9588	-0.144847	0	0.997241	10.6649	-0.137768	0	0.988975	10.9968	-0.150873
O14646	CHD1		6									1	1.03513	0.952904	0.710934	0.259633	0.117271	0.100562	0.0734849									1	1.02306	0.914973	0.70397	0.261593	0.127967	0.10541	0.0943829					10.1119	-0.191597	0.058706	0.997641					10.0768	-0.187702
O14647	CHD2	4	3	1	0.914427	0.904774	0.78206	0.443877	0.235587	0.12019	0.0928698	1	0.997684	1.00324	0.775824	0.308777	0.13022	0.132957	0.101378	1	0.974501	0.957306	0.82187	0.507786	0.247893	0.136044	0.0863717	1	1.04732	1.02016	0.76304	0.330911	0.136885	0.129898	0.105121	11.3274	-0.124717	0	0.985579	10.4986	-0.192672	0.0895812	0.99927	11.8649	-0.124567	0	0.997277	10.5573	-0.178461
O14653-2	GOSR2	9	4	1	1.06375	1.16796	0.936589	0.776683	0.735856	0.705696	0.473741	1	0.895095	1.05641	0.959362	0.69702	0.896988	0.83355	0.306527	1	1.05511	1.07281	0.973611	0.643575	0.687415	0.540703	0.336701	1	1.0006	1.15613	1.07438	0.853849	0.903438	0.736143	0.313752		-0.0401292	0	0.859918	19.8651	-0.187409	0	0.706246	17.6095	-0.0556771	0	0.923226	19.5487	-0.13473
O14656	TOR1A	14	10	1	0.985367	0.992881	0.824875	0.44505	0.194089	0.115427	0.0635571	1	1.01108	1.03306	0.813098	0.41911	0.144739	0.0608788	0.0377591	1	0.969695	0.99433	0.845744	0.436355	0.20238	0.10126	0.0649528	1	0.960031	0.9825	0.788815	0.39376	0.150435	0.0538997	0.0348249	11.4703	-0.140489	0	0.999612	11.2105	-0.160175	0	0.997801	11.511	-0.145502	0.00500951	0.999221	11.0029	-0.158484
O14657	TOR1B	8	9	1	0.985019	1.02402	0.830294	0.472664	0.259117	0.16289	0.118991	1	1.04503	1.03405	0.870583	0.489306	0.258102	0.142426	0.108501	1	0.970106	1.02249	0.856333	0.491906	0.251685	0.151209	0.103864	1	1.01017	1.04483	0.883522	0.478643	0.246943	0.128733	0.103188	11.749	-0.127967	0.0467294	0.998958	11.9463	-0.135629	0.0446487	0.997033	11.9223	-0.1312	0.0319891	0.998574	11.884	-0.144408
O14662-2	STX16	1	1	1	1.01276	1.15345	0.984178	0.725697	0.552991	0.470821	0.302571	1	1.05365	1.02555	0.919938	0.702134	0.62686	0.524982	0.255776	1	0.941122	0.999231	1.04431	0.761544	0.567932	0.433868	0.243277	1	0.915743	1.00745	0.852071	0.604571	0.534242	0.417263	0.319908	16.0274	-0.0745427	0.16024	0.952924	16.6121	-0.0630866	0	0.956565	16.0522	-0.0791887	0	0.97701	14.9374	-0.0675755
O14662-4	STX16	1		1	1.17724	1.21447	1.06979	0.682475	0.506436	0.400727	0.242045									1	1.08208	1.03837	1.00614	0.622435	0.483728	0.415455	0.225104									14.7431	-0.0994594	0.213725	0.90147					14.3143	-0.0948141	0.200104	0.965298
O14662	STX16	8	6	1	1.02248	1.1941	0.988358	0.686335	0.522869	0.434131	0.254602	1	1.02706	1.0508	0.891351	0.663556	0.558883	0.490749	0.285718	1	0.974262	1.02517	0.931677	0.638567	0.521547	0.362765	0.19509	1	1.01716	1.01774	0.963369	0.705564	0.531696	0.384411	0.283668	15.2596	-0.0813747	0.133801	0.937941	15.9265	-0.062859	0	0.974559	14.6054	-0.0806837	0	0.985883	15.275	-0.0797766
O14668	PRRG1	1		1	1.07047	0.986061	0.83801	0.530021	0.427067	0.447744	0.360977									1	1.04172	1.01389	0.889651	0.572244	0.500946	0.433916	0.299961									12.6534	-0.121045	0.381191	0.986695					14.1174	-0.0856383	0.266657	0.982219
O14672	ADAM10	34	25	1	1.01034	1.03375	0.938232	0.683237	0.688809	0.668238	0.475961	1	0.949525	0.998512	0.893577	0.699265	0.804012	0.898456	0.78913	1	1.01221	0.998147	0.886353	0.676739	0.65488	0.536646	0.38444	1	0.998882	1.02505	0.91567	0.765392	0.795656	0.818623	0.731563		-0.0482939	0.398743	0.92724		-0.376375	0.797716	0.720417	18.0878	-0.050633	0	0.975473		-0.555796
O14678	ABCD4	3	1	1	1.04389	0.987853	0.8152	0.38008	0.151062	0.0764912	0.0485296	1	1.03282	0.875231	0.792606	0.538926	0.513691	0.574604	0.637069	1	0.981349	0.966945	0.785473	0.368314	0.143126	0.0724623	0.0374842	1	0.913239	0.972416	0.863835	0.493893	0.56668	0.573137	0.452347	11.0705	-0.159814	0.00120179	0.998521		-0.0774369	0.529805	0.911867	10.8882	-0.159212	0	0.998962		-1.24003
O14681	EI24	5	5	1	1.0266	1.02864	0.849714	0.4062	0.164492	0.0696351	0.0393805	1	1.04901	1.08831	0.854223	0.419007	0.221098	0.100236	0.068736	1	1.04332	1.01406	0.814471	0.390705	0.154986	0.0622093	0.0380108	1	0.955192	1.00363	0.83641	0.388111	0.180466	0.10924	0.0681502	11.3262	-0.16239	0	0.998764	11.4773	-0.15148	0.027488	0.991483	11.1127	-0.161005	0	0.998182	11.1864	-0.161605
O14682	ENC1	1		1	0.921033	1.07059	0.868977	0.405474	0.168718	0.0785711	0.106045									1	0.911582	0.822824	0.771691	0.318358	0.120399	0.0740186	0.0655339									11.3193	-0.177435	0.0610813	0.990215					10.5785	-0.16549	0.011589	0.9672
O14683	TP53I11	3	5	1	1.07005	1.00497	0.827727	0.57064	0.39105	0.259866	0.155596	1	1.01865	0.960462	0.836882	0.465533	0.254419	0.151983	0.0676842	1	1.01921	1.00592	0.883893	0.562048	0.385933	0.242712	0.153347	1	1.01253	1.02397	0.84923	0.474807	0.261488	0.136759	0.0845792	12.9096	-0.0931987	0	0.992653	11.753	-0.126726	0	0.99798	13.014	-0.0984624	0	0.997641	11.8684	-0.127787
O14684	PTGES	1	2	1	0.958865	1.07468	0.838883	0.455429	0.304129	0.340768	0.24855	1	1.05247	1.26155	1.01237	0.675995	0.517791	0.569904	0.351603	1	0.94141	0.944672	0.851613	0.50682	0.335193	0.280477	0.193709	1	0.857751	1.00987	0.755078	0.496134	0.418244	0.400728	0.339665	11.4721	-0.153829	0.270389	0.986558	15.3892	-0.113993	0.442155	0.866677	12.2427	-0.112465	0.143817	0.99071	12.0042	-0.115326
O14686-3	KMT2D	13	10	1	0.942443	1.0256	0.849231	0.555402	0.436458	0.32825	0.230075	1	1.07943	1.0168	0.890954	0.581875	0.3964	0.273268	0.135503	1	0.968173	1.04126	0.929763	0.612129	0.486022	0.325003	0.251429	1	0.977849	0.961066	0.897282	0.583315	0.40724	0.246271	0.119265	13.2595	-0.0881533	0.106598	0.989491	13.2269	-0.0971398	0	0.989628	14.0493	-0.0891671	0.131523	0.989601	13.1981	-0.100409
O14713	ITGB1BP1		3									1	1.00816	1.10612	0.970091	0.537084	0.331273	0.300537	0.181243									1	0.998291	1.06806	0.871559	0.476802	0.293453	0.218039	0.16954					12.4316	-0.156089	0.220516	0.982349					11.8722	-0.13948
O14715	RGPD8	2		1	0.900098	1.02461	0.68009	0.29084	0.0852109	0.0473554	0.0429311									1	0.939376	1.04412	0.824035	0.344347	0.0614029	0.0821613	0.0732421									10.1285	-0.174649	0	0.990559					10.825	-0.197569	0.0352973	0.992502
O14717	TRDMT1	3	5	1	0.950765	0.940502	0.727243	0.348059	0.200577	0.111414	0.111003	1	1.02098	0.999803	0.754907	0.413431	0.192355	0.146588	0.126598	1	1.07843	1.01508	0.90257	0.428784	0.203451	0.143982	0.134003	1	0.934347	0.952458	0.764666	0.41088	0.185478	0.133021	0.114665	10.5988	-0.141152	0.0386208	0.995497	10.9879	-0.138427	0.0589376	0.9985	11.5168	-0.181085	0.116404	0.994919	11.0145	-0.136685
O14727	APAF1	18	12	1	1.01692	1.01066	0.821051	0.369412	0.163446	0.119274	0.0822324	1	0.957625	0.907207	0.729977	0.306144	0.077762	0.0433516	0.0578687	1	0.99957	0.989547	0.786153	0.359088	0.173892	0.108339	0.0862252	1	0.966151	0.936954	0.721195	0.290246	0.105708	0.0628333	0.0482642	10.9999	-0.169541	0.0605994	0.999508	10.3453	-0.174132	0	0.991221	10.853	-0.159986	0.0493585	0.999975	10.2979	-0.169968
O14730	RIOK3	9	15	1	1.00238	1.02725	0.817911	0.373341	0.176661	0.119601	0.0765902	1	1.03319	1.01657	0.817008	0.424842	0.235177	0.179692	0.103029	1	1.0245	1.01682	0.845154	0.380977	0.193493	0.142747	0.0738641	1	0.986042	0.993001	0.805483	0.39616	0.193361	0.14968	0.0987703	11.0369	-0.163995	0.0544629	0.999123	11.3815	-0.138955	0.072022	0.997723	11.1736	-0.16628	0.0706731	0.998244	11.1057	-0.151737
O14732	IMPA2	6	5	1	0.972742	1.51899	0.9264	0.734709	0.911849	0.974871	0.835956	1	0.985902	1.00563	0.934083	0.649191	0.838612	0.974999	0.876005	1	0.995131	1.04488	1.0031	0.819851	0.944888	0.952606	0.705664	1	0.968155	1.02632	0.939655	0.659844	0.781407	0.808264	0.81404		-0.349228	0.864346	0.203255		-0.407903	0.834702	0.450791			0	0.590543		-0.593916
O14733-2	MAP2K7		8									1	0.974203	0.853704	0.720673	0.297274	0.122304	0.116191	0.0932992									1	0.974548	0.900382	0.671903	0.29637	0.135264	0.0972525	0.0840787					10.2611	-0.162791	0.043899	0.982125					10.0658	-0.144989
O14733-3	MAP2K7	10		1	0.995896	0.945343	0.749387	0.323094	0.113785	0.0710132	0.0379834									1	0.976477	0.93292	0.711548	0.308422	0.115067	0.078217	0.045985									10.5368	-0.165875	0	0.998067					10.3182	-0.160429	0	0.996935
O14734	ACOT8	7	3	1	0.99671	0.984212	0.854639	0.449632	0.266604	0.170828	0.126988	1	0.958859	1.01134	0.845432	0.465188	0.366681	0.350097	0.212599	1	0.973708	0.967884	0.822937	0.444176	0.252647	0.155785	0.119723	1	0.94871	1.02611	0.834256	0.470413	0.339432	0.348309	0.213234	11.6707	-0.138116	0.0872355	0.999276	11.9041	-0.128275	0.246609	0.986808	11.5405	-0.131038	0.0527373	0.998591	11.8163	-0.129836
O14735	CDIPT	6	3	1	1.07285	0.940405	0.748848	0.342351	0.116115	0.0777853	0.0551571	1	1.05046	0.976009	0.766897	0.386206	0.100719	0.0401417	0.0061625	1	1.00122	1.04508	0.80224	0.351266	0.134233	0.071146	0.0520945	1	0.997133	0.926434	0.742469	0.31969	0.119269	0.0632769	0.0382186	10.6016	-0.159192	0	0.99354	10.809	-0.169424	0	0.994259	10.8739	-0.17131	0.0159084	0.99824	10.4918	-0.164837
O14737	PDCD5	14	17	1	1.02587	0.974589	0.97114	0.834626	0.998625	1.31697	1.21961	1	0.99878	1.02044	0.944311	0.78748	0.906267	1.17954	1.33011	1	1.00536	1.02763	1.01756	0.900804	1.06091	1.10587	1.03782	1	0.999412	1.06937	0.952117	0.824707	0.849911	1.10357	1.13276		0.394763	1.26829	0.79074		0.514337	1.33011	0.705574		0.116073	1.07185	0.453345		-0.102007
O14744	PRMT5	62	50	1	0.973173	1.00955	0.896026	0.746156	0.849505	0.967362	0.800986	1	0.980364	0.981968	0.897218	0.753507	0.931932	1.07052	1.06753	1	1.0138	1.01709	0.94383	0.804639	0.891214	0.851048	0.683004	1	1.00898	1.0421	0.947272	0.812178	0.905285	1.00192	0.967484		-0.384734	0.841002	0.594594		-0.150159	0.944142	0.0457344		-0.0194033	0	0.797898		-0.199734
O14745	SLC9A3R1	39	34	1	0.936243	0.941958	0.889426	0.799157	0.997871	1.22668	1.07643	1	0.956052	1.00504	0.933827	0.81366	1.12315	1.37662	1.43076	1	1.00943	1.04351	1.00108	0.930774	1.11719	1.08843	0.96113	1	1.00777	1.03662	0.982672	0.893082	1.05296	1.24426	1.28737			0.98111	0.00271417		0.127955	1.42603	0.874519		0.0652893	1.02369	0.0216656		0.0819582
O14756	HSD17B6		1									1	0.842672	0.873588	0.909842	0.564064	0.517212	0.457341	0.115299									1	1.09321	1.03276	0.827572	0.648779	0.600126	0.704784	0.16836					14.1964	-0.0769607	0	0.863129					16.769	-0.0560473
O14757	CHEK1	30	20	1	0.970898	0.971588	0.901192	0.584563	0.202908	0.0575498	0.0311739	1	0.986018	0.993514	0.912538	0.602684	0.202266	0.0327057	0.0159124	1	1.0081	1.02637	0.966837	0.648046	0.227488	0.0676523	0.0357883	1	0.977404	1.0238	0.932455	0.665949	0.227372	0.0473812	0.0227564	12.4031	-0.167719	0	0.996111	12.5124	-0.18174	0	0.996551	12.8423	-0.177239	0	0.999307	12.8847	-0.183765
O14763	TNFRSF10B	8	10	1	0.976391	0.996451	0.891732	0.733731	0.882353	0.962751	0.776514	1	0.888546	0.774334	0.639704	0.466381	0.500908	0.525562	0.42376	1	0.93787	0.948169	0.829914	0.728756	0.823565	0.729361	0.619993	1	0.915891	0.752273	0.638338	0.467771	0.493971	0.490004	0.388481		-0.387501	0.838837	0.547031	14.9793	-0.0741629	0	0.955071		-0.0286473	0.0112455	0.846652	13.4814	-0.0750893
O14772	FPGT	9	15	1	1.02043	1.14206	0.84719	0.439966	0.230005	0.133559	0.0670078	1	1.02353	1.04572	0.811937	0.39972	0.153196	0.0773501	0.0450654	1	0.991277	1.02739	0.876419	0.431205	0.219778	0.12923	0.0685645	1	1.01526	1.01518	0.844037	0.394408	0.144765	0.0766419	0.0500537	11.5957	-0.143581	0.028574	0.983475	11.1501	-0.157534	0	0.997601	11.5848	-0.153901	0.0448962	0.998458	11.2169	-0.167778
O14773	TPP1	14	10	1	0.949995	1.00012	0.813142	0.4769	0.237852	0.119728	0.0644277	1	0.939523	0.939461	0.853968	0.526053	0.320743	0.15957	0.0539874	1	1.02663	0.977524	0.875989	0.514291	0.261454	0.126338	0.0698922	1	0.990872	0.939084	0.838392	0.571535	0.320808	0.151463	0.0765407	11.6551	-0.130868	0	0.996871	12.2711	-0.119742	0	0.989202	12.1229	-0.132159	0	0.998801	12.4513	-0.116999
O14775	GNB5	1	3	1	0.938039	0.946646	0.767861	0.538487	0.349567	0.156692	0.0466362	1	0.979471	0.964483	0.868308	0.577873	0.489836	0.25495	0.0548825	1	0.947232	1.04609	1.01305	0.559512	0.415841	0.201569	0.0863753	1	1.02781	0.951678	0.88172	0.63646	0.408754	0.287116	0.0863224	12.0173	-0.110618	0	0.979487	13.3313	-0.0983041	0	0.968961	13.2711	-0.115408	0	0.977603	13.4913	-0.0997246
O14776	TCERG1	47	57	1	1.06152	1.08357	0.994351	0.73485	0.346882	0.101807	0.0698332	1	1.00246	1.05283	0.910872	0.681602	0.375763	0.0870755	0.0501766	1	1.01933	1.00579	0.91229	0.68647	0.30472	0.104434	0.0610825	1	1.02286	1.0196	0.930466	0.7056	0.381013	0.10741	0.0553393	13.633	-0.153508	0	0.990818	13.3782	-0.140573	0	0.989519	13.2059	-0.147024	0	0.996585	13.5666	-0.1407
O14777	NDC80	33	30	1	1.01639	0.986659	0.854526	0.461099	0.244356	0.193567	0.16822	1	1.00075	0.987865	0.803759	0.379955	0.118376	0.0401603	0.0254865	1	1.01226	1.0081	0.840602	0.459417	0.250584	0.179492	0.138586	1	1.00381	0.993474	0.821567	0.384034	0.130563	0.0544757	0.0341904	11.6106	-0.147094	0.13442	0.999455	10.9682	-0.171655	0	0.998729	11.6328	-0.137816	0.0946115	0.99969	11.0759	-0.16908
O14787	TNPO2	21	22	1	1.09918	1.11064	1.03705	0.606557	0.313998	0.139622	0.0541085	1	1.05152	1.15843	1.01931	0.692314	0.416953	0.238725	0.125544	1	1.04601	1.09607	0.994346	0.607488	0.312111	0.110343	0.0498509	1	1.04406	1.0179	0.997507	0.651244	0.383494	0.195412	0.118347	13.008	-0.147387	0.0165234	0.978122	13.9719	-0.116601	0.031377	0.97155	12.9497	-0.145923	0	0.988848	13.5206	-0.12258
O14792	HS3ST1	2		1	1.0338	1.02361	0.832539	0.48932	0.255916	0.0723206	0.0371838									1	0.963783	1.01359	0.819644	0.535625	0.222302	0.095028	0.0542363									11.7926	-0.13936	0	0.994541					11.9189	-0.136567	0	0.993944
O14795	UNC13B	16	15	1	0.966304	0.949821	0.747931	0.337549	0.13746	0.0818326	0.0579576	1	1.00632	0.936079	0.770347	0.3504	0.110849	0.0672314	0.0365592	1	0.937642	0.928877	0.75364	0.33836	0.1351	0.0791634	0.0558647	1	0.999607	0.98293	0.775183	0.351135	0.109679	0.0648422	0.043874	10.6097	-0.155776	0.00180419	0.99763	10.711	-0.165686	0	0.99676	10.6279	-0.156237	0	0.993483	10.7445	-0.167274
O14802	POLR3A	34	27	1	0.991009	0.964189	0.792206	0.380864	0.162053	0.0858583	0.0439815	1	0.987579	0.980901	0.780676	0.346728	0.128734	0.0599571	0.033959	1	1.01932	0.970607	0.779238	0.370591	0.180108	0.105245	0.0504819	1	0.997781	0.975991	0.763501	0.333197	0.129269	0.0681212	0.0345815	10.9955	-0.152613	0	0.99917	10.7706	-0.166786	0	0.999591	10.9425	-0.145824	0	0.999164	10.6554	-0.164887
O14807	MRAS	2	1	1	0.646124	1.67684	0.607422	0.570935	0.5432	0.628945	0.453192	1	1.11263	1.36314	1.04925	0.890023	0.998837	1.24751	1.13764	1	1.00311	0.935484	0.844575	0.718129	0.811395	1.67651	0.567994	1	0.999643	1.1482	0.845209	0.713737	0.777355	0.91935	0.773169		-0.448539	0.549058	0.4687		0.310703	1.19257	-0.0353415		-0.174678	0.92372	0.01146		-0.500667
O14810	CPLX1	6	1	1	1.03812	1.04244	0.984586	0.820337	0.99434	1.14056	1.04668	1	1.03792	1.0806	1.09866	0.709872	0.911379	1.48234	1.24232	1	0.996061	1.03824	0.96324	0.852138	1.02302	0.962867	0.783262	1	0.93403	0.873156	0.888771	0.714238	0.650262	0.696397	0.563736		0.0687773	1.09361	0.294981		0.10763	1.35497	0.542945			0.155766	0.543153		-0.0353069
O14817	TSPAN4	5		1	1.02959	1.11234	0.984009	0.826132	1.11928	1.2958	1.05045									1	0.981493	1.03604	1.01419	0.779135	1.11373	1.09848	0.901849										0.337777	1.17313	0.414181						-0.0153468	0.974247	0.0232515
O14818-2	PSMA7	1	1	1	0.8854	0.907573	0.968953	0.623499	0.841759	0.832105	0.800258	1	1.01301	0.846154	0.809054	0.632157	0.914178	1.14156	1.49154	1	0.989049	1.17044	1.09071	1.08436	0.921948	1.11085	1.1378	1	0.974893	1.11682	0.817555	0.981547	1.49671	1.84631	1.2467			0.551082	0.34567		-0.102296	0.972442	0.00358597		0.237668	1.1378	-0.0124216		1.02896
O14818	PSMA7	47	50	1	1.00398	1.07635	0.919171	0.785052	0.886645	0.990462	0.8493	1	1.04313	1.09525	0.922953	0.875938	1.11208	1.38545	1.35177	1	1.00478	1.00772	0.893064	0.794676	0.8619	0.797402	0.659662	1	1.09781	1.09314	0.943678	0.823404	0.845364	0.989992	1.17287		-0.308878	0.877865	0.564315		0.839678	1.36861	0.863108		-0.0220511	0	0.868166		-0.156695
O14828-2	SCAMP3	1	1	1	1.219	1.28005	1.50008	0.58097	0.472197	0.212178	0.116181	1	0.732293	0.991792	1.05194	0.638041	0.600506	0.729879	0.477059	1	0.601101	0.973408	0.765681	0.315457	0.185166	0.0867717	0	1	1.08009	0.781844	1.08799	0.544677	0.757056	0.789478	0.284871	13.5472	-0.149304	0.141893	0.772892		-0.692743	0.602481	0.663403	10.6754	-0.158322	0	0.852172	20.2034	-0.0450765
O14828	SCAMP3	20	12	1	1.0597	1.00193	0.862939	0.526468	0.287128	0.149471	0.0754697	1	0.943165	0.929549	0.872145	0.467265	0.285395	0.160385	0.0870087	1	1.02664	0.98408	0.82731	0.474159	0.270729	0.13568	0.0688171	1	0.95182	0.909841	0.853124	0.501093	0.315122	0.181082	0.0797281	12.2311	-0.123979	0	0.996276	11.9617	-0.124487	0.0101307	0.990549	11.7832	-0.125715	0	0.99827	12.1561	-0.115003
O14832	PHYH	4	5	1	0.927959	0.983887	0.936377	0.624795	0.647601	0.600248	0.395789	1	1.13239	1.12393	1.02988	0.778876	0.929116	0.934971	0.467758	1	1.01102	1.03827	0.94047	0.710933	0.760389	0.584611	0.405433	1	1.05297	1.02853	0.991367	0.777993	0.784677	0.709774	0.45518	18.8135	-0.0491572	0.0744927	0.910421	20.8387	-0.200456	0	0.734689	19.6953	-0.0476417	0	0.934027		-0.0429094
O14841	OPLAH	9	10	1	0.985439	1.19808	0.991314	0.735254	0.564549	0.339354	0.225374	1	1.02834	1.09619	0.961955	0.709151	0.564413	0.240454	0.09702	1	1.0004	1.06337	1.00233	0.724967	0.520011	0.328467	0.219263	1	0.959708	0.961166	0.90945	0.699744	0.5274	0.221812	0.111864	15.3949	-0.0857769	0	0.94846	14.6611	-0.106744	0	0.972669	15.0058	-0.0908862	0.042804	0.990187	14.3158	-0.103833
O14867	BACH1	5	5	1	0.981019	1.07496	0.983164	0.767253	0.733757	0.713641	0.479821	1	1.02591	1.09013	0.956158	0.608815	0.649463	0.644895	0.534064	1	1.03773	1.05236	0.988476	0.716993	0.735415	0.670815	0.40456	1	0.952621	1.11602	0.909747	0.653173	0.546854	0.585131	0.46109		-0.039849	0	0.908253		-1.01959	0.609309	0.950765	20.4517	-0.0458546	0	0.902828		-0.0943749
O14874	BCKDK	7	3	1	1.06023	0.949328	0.759513	0.32707	0.121084	0.0686187	0.0453645	1	0.981843	1.01017	0.763232	0.408808	0.291043	0.291283	0.275221	1	0.995915	0.914772	0.69704	0.298951	0.116593	0.0623176	0.0501474	1	0.975972	1.03294	0.834855	0.392335	0.296606	0.290833	0.271316	10.6031	-0.164938	0	0.995885	10.838	-0.161481	0.264671	0.998914	10.2072	-0.160866	0	0.995871	10.9234	-0.191588
O14879	IFIT3		1									1	1.0126	1.18773	1.00107	0.57324	0.388606	0.125702	0.0589816									1	1.1724	1.39088	1.09501	0.587053	0.319066	0.138822	0.0639775					13.0641	-0.130775	0	0.962854					12.8977	-0.160032
O14880	MGST3	7	3	1	0.989805	0.96959	0.834849	0.528102	0.262999	0.12577	0.0424975	1	1.01575	0.932212	0.776325	0.516147	0.29158	0.103614	0.00598265	1	1.03407	1.03189	0.863687	0.540518	0.282798	0.133913	0.06384	1	1.03923	0.950324	0.797232	0.517972	0.28302	0.136558	0.0451885	12.037	-0.129985	0	0.996074	11.7387	-0.126118	0	0.98316	12.2778	-0.128077	0	0.996767	11.8715	-0.121959
O14893	GEMIN2	8	4	1	0.945033	1.0376	0.963237	0.846629	0.951631	0.977556	0.665401	1	1.0284	1.04921	0.974503	0.904096	1.05683	1.20888	0.938785	1	0.951525	0.988404	1.03697	0.928611	0.984784	0.875359	0.6012	1	1.06836	1.02443	0.924125	0.874348	0.974424	0.970766	0.715953			0	0.674565			1.04818	0.0077049		-0.104328	0	0.933756
O14896	IRF6	10	7	1	1.00714	1.01121	0.93378	0.625506	0.3199	0.212991	0.180357	1	1.01172	1.10312	1.00357	0.6467	0.261305	0.0760997	0.0558167	1	0.98209	1.05084	0.990212	0.680101	0.352386	0.224001	0.167412	1	1.05399	1.14428	1.02646	0.711742	0.297256	0.124457	0.0688113	12.9604	-0.134243	0.129478	0.999527	12.9433	-0.170091	0.0107895	0.991245	13.4021	-0.140668	0.135409	0.996601	13.3511	-0.166988
O14907	TAX1BP3	5	7	1	1.05694	1.21547	0.958041	0.77794	0.878941	0.883874	0.519353	1	1.00447	1.10258	1.02447	0.844423	0.983507	1.17887	0.654127	1	1.04697	1.02413	0.952007	0.733152	0.81594	0.693315	0.37671	1	1.11032	1.11679	1.03549	0.852772	0.996664	0.914824	0.68361		-0.0345658	0	0.623277		0	0	0.628209	20.6599	-0.0471991	0	0.858633
O14908	GIPC1	20	18	1	1.02256	1.06048	0.931734	0.549729	0.219551	0.0578697	0.0260363	1	0.971165	1.00315	0.884585	0.578118	0.283269	0.114491	0.075491	1	1.02483	1.03005	0.942901	0.575895	0.228798	0.0702529	0.0282551	1	1.00108	0.987803	0.880097	0.594064	0.283498	0.128942	0.0730901	12.313	-0.166593	0	0.996215	12.5218	-0.132341	0	0.99774	12.4823	-0.1651	0	0.998389	12.6047	-0.130468
O14920	IKBKB	16	23	1	1.00339	1.06237	0.804712	0.442653	0.210813	0.1406	0.103432	1	0.999895	0.963192	0.814531	0.427319	0.2233	0.118852	0.0777399	1	1.01801	1.01318	0.827214	0.433204	0.227427	0.134507	0.0805889	1	1.01183	1.00159	0.839984	0.437217	0.214357	0.143264	0.0798814	11.3928	-0.138784	0.0428914	0.995825	11.4055	-0.133626	0	0.999153	11.4811	-0.137554	0.0234204	0.999251	11.5032	-0.142633
O14924	RGS12	2		1	1.011	1.09785	0.652027	0.340527	0.227086	0.149389	0.113449									1	1.10631	0.998868	0.693249	0.378058	0.156322	0.126969	0.120358									10.2394	-0.154152	0.102524	0.98732					10.5092	-0.143115	0.0472942	0.988848
O14925	TIMM23	5	5	1	1.39041	1.25201	1.00565	0.45716	0.13994	0.057554	0.0528747	1	1.05444	0.963867	0.799359	0.320788	0.1014	0.0276732	0.00220817	1	1.10519	1.04677	0.76189	0.282698	0.103478	0.0520051	0.0355772	1	0.972183	0.938288	0.709832	0.284527	0.0761206	0.011268	0.00813095	11.8508	-0.253015	0.0555642	0.899391	10.7098	-0.188261	0	0.996628	10.4425	-0.189613	0.0129926	0.991378	10.1906	-0.187095
O14929	HAT1	33	19	1	1.03891	1.00548	0.867976	0.505385	0.303162	0.187578	0.0786956	1	1.02582	0.99842	0.841042	0.459818	0.258383	0.174723	0.0726957	1	1.01443	0.995442	0.835193	0.468767	0.294734	0.165753	0.0729863	1	1.02968	0.985972	0.837369	0.47542	0.268144	0.164219	0.0746625	12.2382	-0.118072	0	0.996583	11.784	-0.124902	0.00426198	0.997794	11.8861	-0.120143	0	0.997621	11.8562	-0.12296
O14933	UBE2L6	6	8	1	0.992719	0.977644	0.897454	0.620862	0.306769	0.107333	0.0619055	1	0.993748	0.993392	0.971494	0.691146	0.491625	0.314937	0.0873179	1	1.02377	1.05256	0.956138	0.656769	0.382083	0.162975	0.0540491	1	1.00941	1.02001	0.961737	0.732221	0.541391	0.243571	0.210444	12.8374	-0.136133	0	0.996571	14.4192	-0.101146	0	0.985618	13.4299	-0.128113	0	0.993939	14.8359	-0.0951839
O14936	CASK	30	21	1	1.03271	1.09721	1.01956	0.825483	0.867041	0.649753	0.207877	1	0.975058	1.03279	0.939823	0.770219	0.894429	0.797441	0.191654	1	1.02625	1.02695	0.95852	0.776748	0.82899	0.529635	0.179271	1	0.975413	1.00544	0.971691	0.825437	0.848698	0.699094	0.24212	18.7106	-0.14056	0	0.920095	19.337	-0.232406	0	0.868744	17.8049	-0.112191	0	0.921555	19.0204	-0.130895
O14939	PLD2	11	15	1	0.989434	1.05112	0.809883	0.377127	0.181121	0.106232	0.0642123	1	1.0084	1.03202	0.826928	0.404341	0.180024	0.114355	0.0752445	1	1.00349	0.947989	0.782926	0.355217	0.169257	0.120077	0.06921	1	0.982797	0.972581	0.790333	0.385185	0.169837	0.0970592	0.0636865	11.0618	-0.158059	0.0330135	0.997433	11.2317	-0.155959	0.0376474	0.998905	10.8344	-0.15589	0.036556	0.998012	11.021	-0.148301
O14944	EREG	7	7	1	0.959609	0.934456	0.902616	0.756632	0.85434	0.99497	0.860813	1	0.967594	0.98985	0.871793	0.743428	0.871538	1.00621	1.0829	1	0.919517	0.951179	0.900445	0.775509	0.880609	0.773302	0.690305	1	0.995435	1.01876	0.912355	0.807314	0.817606	0.89373	0.933786		-0.058542	0.872853	0.33902		-0.23179	0.915174	0.111241		-0.0219328	0.136007	0.744134		-0.335263
O14949	UQCRQ	9	4	1	0.978231	0.902639	0.743071	0.332476	0.0911761	0.025959	0.0209662	1	0.952284	0.936911	0.750922	0.35859	0.119877	0.0592521	0.0258036	1	0.979121	0.934785	0.758101	0.329597	0.0971867	0.0401353	0.0292725	1	1.03501	0.961851	0.730481	0.320791	0.120054	0.058452	0.0280238	10.4872	-0.174751	0	0.991363	10.6579	-0.162075	0	0.994517	10.5644	-0.174607	0	0.996113	10.4519	-0.1658
O14950	MYL12B	67	54	1	1.10351	1.20904	1.00975	0.859596	0.863406	0.635071	0.38786	1	1.03178	1.07945	0.931717	0.823782	0.95231	0.813678	0.477439	1	1.01717	1.03734	0.954086	0.770767	0.786713	0.467926	0.269885	1	1.04349	1.05236	0.954649	0.823978	0.807424	0.654865	0.442783	19.5873	-0.0759861	0	0.862489	20.8467	-0.109868	0	0.830905	17.5008	-0.0763596	0	0.9455	20.8188	-0.049701
O14960	LECT2	1		1	1.14981	1.16186	0.892568	0.515663	0.366738	0.24386	0.150826									1	1.34923	1.37948	1.08491	0.524075	0.360376	0.232166	0.145379									12.5237	-0.117302	0.10977	0.954735					12.3836	-0.190814	0.206662	0.83482
O14964	HGS	44	29	1	0.993843	0.978524	0.894607	0.762911	0.856085	0.544916	0.106685	1	1.00336	1.00806	0.906493	0.688908	0.709655	0.530267	0.0664208	1	1.0105	1.02231	0.950786	0.87802	0.931007	0.530752	0.113315	1	1.03564	1.01716	0.975131	0.761534	0.699232	0.488407	0.116887	17.9417	-0.157473	0	0.887834	16.2344	-0.0806188	0	0.868339	18.1079	-0.197237	0	0.974736	16.5714	-0.0907611
O14965	AURKA	10	6	1	1.03157	0.988377	0.843619	0.402563	0.205073	0.118147	0.07603	1	1.00607	0.960147	0.83279	0.425571	0.250575	0.235863	0.166249	1	0.992699	1.0106	0.804576	0.407436	0.199964	0.10561	0.0751855	1	1.0763	1.05048	0.863962	0.489169	0.2896	0.217704	0.173239	11.3127	-0.154555	0.0441276	0.998834	11.3374	-0.150205	0.161986	0.997173	11.2229	-0.14346	0.013505	0.999678	11.9282	-0.134764
O14966	RAB7L1	5	3	1	1.00096	0.896077	0.771469	0.374441	0.154886	0.0715407	0.0445888	1	0.985933	0.929448	0.777785	0.357635	0.120957	0.0341044	0.0269607	1	0.987599	0.955221	0.821931	0.414026	0.178913	0.0855	0.0581699	1	0.98103	1.02044	0.745146	0.355334	0.114274	0.0443994	0.0270899	10.8409	-0.151941	0	0.992216	10.766	-0.169449	0	0.995372	11.274	-0.148983	0	0.998512	10.6344	-0.166767
O14967	CLGN	8	3	1	0.987518	1.04353	0.947777	0.572556	0.398022	0.245937	0.114372	1	0.870213	0.974644	0.969205	0.54223	0.421131	0.317825	0.111439	1	0.990546	0.99768	0.908453	0.642207	0.403497	0.207373	0.0942619	1	1.04756	0.99242	0.921942	0.629967	0.47039	0.233742	0.115106	13.2591	-0.105333	0	0.990602	13.4142	-0.0972707	0	0.953105	13.4357	-0.110517	0	0.996596	13.7402	-0.101145
O14972	DSCR3	10	7	1	1.00821	1.02456	0.921251	0.546792	0.288994	0.10861	0.0770666	1	0.964893	1.0147	0.894799	0.578565	0.310327	0.123447	0.0563997	1	1.04278	1.01601	0.914998	0.588104	0.288498	0.111629	0.065412	1	1.03114	1.05576	0.911822	0.581738	0.331093	0.11203	0.0652667	12.471	-0.135857	0	0.998184	12.6275	-0.131093	0	0.996419	12.6616	-0.137635	0	0.997475	12.7391	-0.131228
O14974	PPP1R12A	40	35	1	1.00113	0.969731	0.891158	0.499761	0.189639	0.0730475	0.0433057	1	0.983157	1.02214	0.888798	0.52023	0.20567	0.0863543	0.0424162	1	1.01461	1.03374	0.927924	0.51914	0.202242	0.0867316	0.0537539	1	1.01685	1.01811	0.923353	0.553907	0.214811	0.0924685	0.0553158	11.9207	-0.158519	0	0.998926	12.0498	-0.153026	0	0.998775	12.1276	-0.16272	0.0111173	0.998959	12.3243	-0.155239
O14975	SLC27A2	10	15	1	1.02752	1.05195	0.876262	0.390399	0.156589	0.0924212	0.0668423	1	0.98777	0.954868	0.824721	0.405851	0.272043	0.228705	0.222477	1	1.03308	1.01339	0.79847	0.351599	0.151981	0.0882784	0.0673892	1	1.00584	0.97314	0.782079	0.427042	0.256461	0.215678	0.219931	11.2829	-0.181771	0.0478234	0.997455	11.1301	-0.162708	0.206929	0.997768	10.8592	-0.168178	0.0338992	0.998959	11.1352	-0.142489
O14976	GAK	37	29	1	1.06387	1.10155	0.943507	0.542062	0.366205	0.283844	0.210642	1	1.06538	1.05064	0.866249	0.437832	0.181829	0.0531101	0.0378341	1	1.05991	1.05542	0.910516	0.536885	0.375073	0.249705	0.180525	1	1.05416	1.07025	0.869319	0.420318	0.177106	0.0669352	0.0424395	12.5931	-0.135666	0.214666	0.982343	11.5398	-0.162219	0	0.994618	12.6882	-0.116866	0.134708	0.989998	11.4745	-0.162546
O14977	AZIN1	2		1	0.891535	1.13977	1.01306	0.879674	0.907661	1.08497	0.750742									1	0.940275	1.0288	1.01647	0.758008	0.81701	0.73939	0.643637										0	0	0.439129						-0.166887	0.732953	0.870236
O14979	HNRNPDL	38	19	1	0.987081	0.949489	0.869679	0.724614	0.786372	0.722826	0.41754	1	0.973165	0.96213	0.847288	0.762539	0.83515	0.894809	0.568729	1	1.01327	1.00999	0.90284	0.779135	0.778355	0.631486	0.365134	1	1.00214	0.994578	0.875558	0.808896	0.824106	0.870833	0.571867		-0.0370006	0	0.824049		-0.0240123	0.0598015	0.613846	19.6587	-0.0510594	0	0.921159		-0.0238864
O14980	XPO1	92	105	1	1.01347	0.973346	0.813602	0.393806	0.145002	0.056402	0.0345869	1	0.963861	0.764665	0.762658	0.392666	0.128796	0.0461031	0.0273927	1	0.989473	0.964262	0.780003	0.365584	0.14461	0.0634042	0.036246	1	1.04622	0.848351	0.768661	0.368865	0.127596	0.0517564	0.0286955	11.0982	-0.162955	0	0.998938	10.7706	-0.154687	0	0.951658	10.8521	-0.159846	0	0.99893	10.7526	-0.160353
O14981	BTAF1	45	33	1	1.01761	1.01235	0.807615	0.395517	0.222746	0.139451	0.10831	1	0.994827	0.959491	0.770042	0.327226	0.133919	0.0870909	0.0506173	1	0.999339	1.02082	0.810723	0.374875	0.199522	0.158032	0.0861516	1	1.01098	0.964041	0.748283	0.329754	0.134992	0.0892146	0.0510002	11.156	-0.148604	0.0720792	0.999269	10.6485	-0.166832	0.0175441	0.998968	11.0315	-0.158988	0.0786768	0.998451	10.5817	-0.159582
O15013	ARHGEF10	30	21	1	1.03062	1.02075	0.901897	0.476018	0.203724	0.103245	0.0634129	1	0.983307	0.986977	0.852433	0.445311	0.1776	0.0692774	0.0346194	1	0.992152	0.95354	0.839078	0.458593	0.190173	0.0958988	0.0607337	1	1.03795	1.03431	0.882907	0.463761	0.18164	0.070761	0.0399502	11.8527	-0.157484	0.0239811	0.998898	11.5178	-0.157263	0	0.999189	11.5569	-0.14473	0	0.99811	11.7162	-0.160688
O15014	ZNF609	17	12	1	0.944124	0.964894	0.825075	0.481467	0.368694	0.318138	0.214939	1	0.964344	0.959318	0.828893	0.42841	0.310215	0.277724	0.23254	1	1.00324	1.01671	0.880822	0.506991	0.372558	0.29927	0.217684	1	0.971432	0.988519	0.803397	0.444443	0.302055	0.2628	0.195105	12.1346	-0.108815	0.184202	0.989745	11.3409	-0.151039	0.234719	0.995827	12.3504	-0.121163	0.208002	0.996026	11.4854	-0.130012
O15015-2	ZNF646	2	1	1	0.902684	1.04683	0.87382	0.440042	0.476978	0.342196	0.291273	1	1.13918	1.04899	0.73226	0.562071	0.351087	0.223006	0.00305066	1	0.773882	0.854161	0.735516	0.531731	0.601779	0.473306	0.329898	1	1.00713	1.00373	1.32621	0.471059	0.460646	0.178657	0.131681	11.6898	-0.15888	0.344571	0.960664	12.0974	-0.10722	0	0.955622	15.3034	-0.0599625	0	0.793232	11.9365	-0.341586
O15020	SPTBN2	14	7	1	1.00556	1.78866	0.851577	0.545114	0.387624	0.166823	0.0953949	1	1.02256	1.04695	0.867782	0.54552	0.425672	0.227278	0.106178	1	1.00731	1.00936	0.902248	0.541294	0.362583	0.17085	0.0991543	1	0.99141	1.09423	0.880761	0.528641	0.394826	0.233936	0.121065	12.7597	-0.114859	0	0.705083	12.936	-0.100809	0	0.987403	12.6935	-0.114461	0	0.996039	12.8315	-0.102438
O15021	MAST4	3		1	0.824113	3.3043	0.674638	0.361485	0.173806	0.0790817	0.0574913									1	0.862129	0.88544	0.734466	0.372779	0.173134	0.0994512	0.0669633									10.478	-0.196693	0.0813372	0.327112					10.6744	-0.137877	0	0.972483
O15031	PLXNB2	64	45	1	0.982753	0.994564	0.863685	0.507474	0.25584	0.105039	0.0565483	1	1.00132	1.0241	0.878356	0.538771	0.308822	0.143328	0.0737066	1	1.01173	1.02308	0.887431	0.529295	0.268151	0.116815	0.0598849	1	0.991484	1.00662	0.885487	0.539753	0.279334	0.141567	0.0684291	12.0168	-0.136144	0	0.998681	12.3977	-0.124145	0	0.997947	12.2431	-0.135457	0	0.998712	12.3407	-0.129166
O15033	AREL1	3	3	1	1.07928	1.06699	0.902644	0.541219	0.317612	0.22796	0.135152	1	1.07113	1.03912	0.853811	0.471512	0.219982	0.132185	0.0493276	1	0.967296	1.02027	0.851064	0.481475	0.280806	0.184985	0.0964203	1	1.04984	1.02467	0.868744	0.465189	0.231864	0.150294	0.108747	12.5154	-0.123067	0.0879359	0.988717	11.7635	-0.138679	0	0.994241	11.9732	-0.122422	0.0254765	0.997257	11.7286	-0.146089
O15037	KHNYN	2	4	1	0.983065	1.03817	0.825691	0.475734	0.281944	0.191036	0.162385	1	1.05506	1.04384	0.852513	0.415611	0.155264	0.0518954	0.038397	1	1.03369	1.04098	0.88154	0.479469	0.249542	0.161705	0.126105	1	1.0965	1.07738	0.848121	0.407003	0.151818	0.0772845	0.0334682	11.7549	-0.127555	0.102232	0.997757	11.3576	-0.166947	0	0.996179	11.8571	-0.145682	0.0885749	0.997437	11.3141	-0.164655
O15040	TECPR2	5	6	1	1.09195	1.13049	0.962161	0.555221	0.380923	0.300655	0.225683	1	0.981855	0.94193	0.882389	0.464598	0.262973	0.172459	0.142782	1	1.0627	1.06831	0.881126	0.496362	0.322088	0.235925	0.180096	1	1.01036	1.05633	0.89629	0.495635	0.264745	0.191465	0.136079	12.7143	-0.138718	0.239075	0.970775	11.7801	-0.146257	0.110761	0.996291	12.1051	-0.131888	0.157111	0.990498	12.005	-0.144848
O15042	U2SURP	32	27	1	1.02227	1.00506	0.902377	0.517341	0.19472	0.0796198	0.0600218	1	0.984288	1.02354	0.86344	0.477047	0.210931	0.10506	0.0840281	1	1.01299	0.997899	0.895769	0.481758	0.191422	0.0890243	0.0632889	1	1.01023	1.03393	0.908459	0.500608	0.222006	0.113822	0.0929199	12.051	-0.156479	0	0.999189	11.7672	-0.144681	0.0164211	0.999002	11.8461	-0.157912	0.0131647	0.99979	12.002	-0.155546
O15047	SETD1A	14	14	1	0.962634	0.94202	0.823108	0.464845	0.237191	0.127327	0.102459	1	0.984912	0.993365	0.820724	0.448674	0.197166	0.0906191	0.0557831	1	0.988578	0.989469	0.870175	0.502238	0.243317	0.133467	0.0938017	1	0.989268	1.01753	0.827775	0.466143	0.201241	0.0923813	0.0463126	11.6401	-0.126567	0	0.996088	11.4573	-0.143483	0	0.999285	11.9963	-0.133937	0.0169162	0.999801	11.5748	-0.143939
O15049	N4BP3	1		1	0.958012	1.27959	0.833723	0.453263	0.367991	0.191753	0.104127									1	0.909687	0.941182	0.784386	0.366681	0.221751	0.16809	0.047909									12.0405	-0.118872	0.0557128	0.926145					11.033	-0.133714	0.00941376	0.985824
O15055	PER2	1	1	1	1.09167	1.23827	1.07752	0.708982	0.365888	0.187203	0.0510232	1	0.967332	0.95796	0.750243	0.584565	0.473173	0.395367	0.280206	1	1.00464	1.30422	1.09386	0.594826	0.329895	0.11685	0.0838449	1	1.23119	1.43154	1.26235	0.884857	0.585579	0	0.284969	13.7639	-0.139009	0	0.946966	13.7903	-0.0683154	0	0.993497	12.9433	-0.159739	0.0582365	0.926978	15.0379	-2.2816
O15056	SYNJ2	12	16	1	1.013	1.05275	0.898815	0.474045	0.215341	0.128363	0.083911	1	1.00595	1.01517	0.876223	0.428383	0.19118	0.103174	0.0850645	1	1.0211	1.03882	0.890655	0.461109	0.211713	0.116733	0.0889949	1	1.00742	1.00689	0.931814	0.462814	0.176991	0.107865	0.0729792	11.8349	-0.156578	0.0527517	0.997522	11.499	-0.164512	0.0505775	0.999698	11.7366	-0.157853	0.0525281	0.998354	11.7846	-0.184592
O15060	ZBTB39	1		1	1.00481	1.0152	0.85256	0.655644	0.336012	0.203776	0.191158									1	1.07408	1.13287	1.02563	0.62757	0.368373	0.213922	0.118009									13.1553	-0.103483	0.0206724	0.992753					13.3174	-0.131657	0.0797414	0.97458
O15062	ZBTB5	1	1	1	1.01531	1.16733	0.890388	0.418536	0.145151	0.170911	0.0621028	1	0.909153	1.094	0.969922	0.434698	0.23129	0.176193	0.150341	1	1.00541	0.98366	0.672836	0.323835	0.146489	0.0727071	0.065913	1	1.09014	1.00244	0.681108	0.530692	0.268699	0.186954	0.101314	11.4227	-0.184202	0.0782648	0.976773	11.6797	-0.221234	0.16441	0.984621	10.2428	-0.149797	0	0.999559	11.4181	-0.10669
O15063	KIAA0355	3	3	1	1.06856	1.00226	0.865475	0.457148	0.196419	0.16674	0.0933886	1	1.04541	1.17051	0.905594	0.444657	0.220051	0.122762	0.0580817	1	0.90693	0.993017	0.800659	0.451619	0.235242	0.147889	0.102299	1	1.01868	1.07459	0.841949	0.459705	0.201388	0.117109	0.0816664	11.6122	-0.152626	0.0696673	0.994965	11.7307	-0.161818	0.0461787	0.977417	11.5012	-0.126335	0.0141309	0.99173	11.6021	-0.144502
O15066	KIF3B	14	9	1	0.958347	0.943914	0.772747	0.280547	0.074889	0.0479763	0.029618	1	0.981867	1.01688	0.880683	0.376312	0.133974	0.112757	0.0763889	1	1.00352	1.02307	0.851571	0.31352	0.0942583	0.0519254	0.0379084	1	1.004	1.03803	0.864837	0.41313	0.144676	0.10604	0.082874	10.4534	-0.193258	0.0018226	0.996442	11.1885	-0.195331	0.0669024	0.99911	10.855	-0.207012	0.0211593	0.999569	11.3268	-0.17566
O15067	PFAS	62	44	1	0.984851	0.980694	0.902868	0.682246	0.430795	0.0823924	0.0291555	1	1.00119	1.04653	0.931398	0.70676	0.554025	0.145468	0.020992	1	1.02004	1.02738	0.967167	0.753221	0.476975	0.113536	0.0416119	1	1.03061	1.0183	0.982581	0.751128	0.553312	0.169879	0.0357311	13.5471	-0.137296	0	0.981176	14.3198	-0.126819	0	0.966614	14.2045	-0.142433	0	0.988246	14.648	-0.131654
O15068	MCF2L	4	3	1	0.952143	0.985981	0.815978	0.378836	0.16577	0.0830274	0.0576537	1	0.89823	0.839063	0.714036	0.218971	0.0849631	0.069179	0.0770502	1	0.921417	0.988841	0.827237	0.429589	0.19364	0.0959218	0.0529261	1	0.966658	0.948356	0.710363	0.240743	0.108316	0.0778191	0.0589667	11.0772	-0.158533	0.0123971	0.998089	9.98074	-0.213816	0.0495061	0.970016	11.3966	-0.145697	0	0.994735	10.0643	-0.198221
O15078	CEP290	3	2	1	1.02913	1.09168	0.930659	0.605977	0.348446	0.226674	0.12924	1	1.01082	0.981836	0.913033	0.748211	0.561959	0.250467	0.00546215	1	0.988441	1.00024	0.878066	0.598814	0.331348	0.163889	0.079578	1	1.02083	1.00468	0.924931	0.779657	0.571318	0.288989	0.0489024	13.1014	-0.115974	0.0462328	0.990346	14.7604	-0.120801	0	0.967628	12.799	-0.119359	0	0.997778	15.0925	-0.11536
O15084	ANKRD28	19	16	1	0.960571	0.974822	0.785814	0.36916	0.134063	0.076372	0.0545684	1	1.01936	0.949468	0.759391	0.339234	0.0957862	0.0410666	0.0339527	1	0.985116	0.958367	0.783837	0.366985	0.142333	0.0814662	0.0489774	1	0.99073	1.01361	0.799025	0.326374	0.0995943	0.0436093	0.0325443	10.8874	-0.158614	0	0.99811	10.6041	-0.173115	0	0.997041	10.8789	-0.156564	0	0.998702	10.7401	-0.182999
O15085-2	ARHGEF11	8	11	1	1.1368	1.14767	1.00596	0.506135	0.223786	0.0628821	0.0277026	1	1.04188	1.02022	0.858625	0.462308	0.167499	0.050986	0.0398913	1	1.05844	1.07356	0.980896	0.484195	0.170432	0.0713083	0.0363235	1	1.016	1.04383	0.871974	0.477565	0.179387	0.0819009	0.0469997	12.2099	-0.181099	0.0151121	0.972063	11.6008	-0.162129	0	0.997246	11.978	-0.202832	0.034531	0.993429	11.7474	-0.155978
O15091	KIAA0391	22	13	1	0.994067	0.903431	0.737755	0.321092	0.103143	0.0484215	0.0274982	1	1.00644	0.98474	0.733712	0.343265	0.134732	0.0600668	0.0472383	1	0.989273	0.946608	0.74154	0.315659	0.114442	0.0526107	0.0294411	1	0.968486	0.965185	0.725655	0.326169	0.147922	0.0873406	0.0467811	10.4453	-0.169666	0	0.993309	10.5666	-0.158469	0	0.999459	10.4724	-0.169561	0	0.998107	10.4938	-0.153343
O15111	CHUK	33	21	1	0.99362	0.973332	0.806743	0.364803	0.135505	0.0626907	0.0473693	1	1.00663	0.964387	0.77301	0.36872	0.119959	0.0377462	0.0339734	1	0.98853	0.960118	0.783676	0.362432	0.143157	0.0710326	0.0565517	1	0.989181	0.944146	0.741591	0.337531	0.118805	0.0577229	0.0327175	10.9517	-0.165051	0	0.999453	10.7932	-0.166731	0	0.997723	10.8599	-0.157707	0	0.998833	10.5474	-0.163833
O15116	LSM1	13	11	1	0.982603	1.03866	0.888584	0.725171	0.861167	1.041	0.815272	1	1.04928	1.05727	0.989393	0.809595	1.12563	1.31746	1.31103	1	0.980908	1.02369	0.965078	0.820452	0.949264	0.871797	0.717453	1	1.01585	1.05854	1.04758	0.922329	1.08591	1.25956	1.13364		-0.318069	0.860651	0.407664		0.856712	1.31424	0.790556		-0.0173736	0	0.68843		0.433438
O15118	NPC1	18	10	1	1.02003	1.03867	0.960034	0.73627	0.655236	0.46879	0.251288	1	1.0381	1.05246	0.903684	0.704089	0.660505	0.50909	0.239949	1	1.03244	1.091	1.01097	0.776456	0.673319	0.410716	0.247759	1	1.02859	1.06575	0.979616	0.708526	0.544575	0.428655	0.25608	16.5827	-0.0703948	0	0.973569	16.6031	-0.0644631	0	0.947349	16.5425	-0.0806417	0	0.971412	15.6752	-0.0740227
O15119	TBX3	2		1	0.981109	1.09357	0.902848	0.547316	0.510156	0.447454	0.252254									1	1.00936	1.16453	1.00381	0.591654	0.393687	0.319296	0.180023									13.9506	-0.0881827	0.249143	0.953626					13.1663	-0.128784	0.200395	0.962182
O15120	AGPAT2	4	3	1	1.01717	0.969116	0.814712	0.373297	0.12016	0.0365978	0.0279131	1	1.02507	1.02449	0.86763	0.452139	0.20063	0.0999761	0.0560732	1	0.998097	1.02055	0.815403	0.418349	0.126729	0.0563677	0.031788	1	1.00406	1.00191	0.798514	0.39975	0.173089	0.100219	0.07224	10.9858	-0.174325	0	0.998424	11.6568	-0.149354	0.00402473	0.998948	11.1891	-0.165105	0	0.997888	11.1153	-0.14884
O15121	DEGS1	2	3	1	0.949085	1.04819	0.911993	0.521696	0.302305	0.179811	0.106277	1	0.953334	1.09348	0.996185	0.623941	0.656407	0.64744	0.581375	1	1.02623	1.01008	0.928932	0.541265	0.300415	0.171645	0.120115	1	1.01319	1.15901	1.01158	0.675867	0.63107	0.631851	0.631494	12.3689	-0.129874	0.0539634	0.993937		-1.14235	0.627291	0.953592	12.4659	-0.135183	0.0708455	0.998499		-0.639034
O15126	SCAMP1	14	10	1	0.927418	0.958953	0.944458	0.741535	0.846399	0.990213	0.75365	1	0.969645	1.02874	0.975818	0.802239	0.993743	1.14716	1.07189	1	1.00066	1.01522	0.995454	0.863344	0.966839	0.867782	0.718338	1	0.999433	1.06781	0.997787	0.851019	0.935548	1.03127	0.958006		-0.494785	0.832949	0.367803		0.0122356	1.00327	0.000724924		-0.0315304	0	0.784265		-0.146189
O15127	SCAMP2	5	4	1	1.05079	1.09845	0.97111	0.861707	0.907974	1.13656	0.839879	1	1.03478	1.17025	0.969479	0.816473	0.999659	1.02813	1.02971	1	1.05111	1.05506	0.956392	0.826222	1.00773	0.782132	0.60191	1	1.1172	1.20917	1.0572	0.790344	0.847754	0.977476	0.879112		-0.146301	0.936531	0.177858		-0.0439143	0.968529	0.0696258		-0.0690097	0	0.777423		-0.0786335
O15131	KPNA5	3		1	1.48419	1.53991	1.52223	0.842226	0.508531	0.174168	0.0813487									1	1.10543	1.12838	0.936043	0.455718	0.204647	0.104251	0.0471327									14.9261	-0.154827	0.00769773	0.67811					11.8235	-0.173642	0.0403	0.980885
O15143	ARPC1B	25	21	1	1.11787	1.12068	0.982656	0.837222	0.801834	0.7193	0.28726	1	0.920141	0.917277	0.867559	0.71521	0.769757	0.832859	0.324745	1	1.01129	0.959594	0.855396	0.724083	0.697437	0.482845	0.188761	1	1.00468	1.00299	0.895609	0.833066	0.778316	0.719127	0.403001	19.1906	-0.0869188	0	0.863567		-0.0376477	0	0.598371	16.4082	-0.0690017	0	0.918135	20.9922	-0.0479079
O15144	ARPC2	57	44	1	0.976788	1.1269	0.94715	0.820255	0.924496	0.87136	0.40285	1	0.968633	1.00957	0.926305	0.816817	1.01504	1.08024	0.515551	1	1.00011	1.03698	0.995127	0.877757	0.99543	0.805955	0.355758	1	0.998641	1.05951	0.983277	0.911415	0.989385	1.03554	0.570859	20.4121	-0.170196	0	0.824815		0	0	0.792936	19.7632	-0.183987	0.232312	0.954669		0
O15145	ARPC3	15	16	1	1.01139	1.02617	0.89603	0.615959	0.26248	0.0668055	0.0262991	1	1.03189	1.08583	0.963142	0.685002	0.405241	0.178745	0.056553	1	0.997158	0.980995	0.945557	0.652672	0.287718	0.0984561	0.0350099	1	1.05829	1.06818	0.941165	0.695263	0.381402	0.178128	0.0755468	12.6772	-0.155688	0	0.995087	13.6905	-0.126323	0	0.989495	13.0188	-0.15384	0	0.998696	13.6349	-0.125661
O15151	MDM4	4	4	1	0.974383	1.02587	0.909272	0.667724	0.443968	0.235504	0.0814193	1	0.955858	0.938586	0.87955	0.561618	0.385141	0.202678	0.0778788	1	1.01005	1.00685	0.967121	0.678138	0.448008	0.262142	0.101569	1	1.03845	1.06583	0.935402	0.651393	0.427678	0.206205	0.0718465	13.7792	-0.107624	0	0.990909	12.817	-0.108861	0	0.987905	14.0403	-0.106475	0	0.9946	13.6191	-0.114212
O15155	BET1	5	6	1	0.980141	1.00928	0.909909	0.592312	0.434899	0.335346	0.200411	1	0.978479	1.04808	0.91264	0.578111	0.463424	0.389991	0.181959	1	0.953961	0.938061	0.874735	0.620154	0.429918	0.277815	0.163855	1	0.986824	1.04698	0.907452	0.615067	0.460227	0.323627	0.217121	13.6737	-0.0896718	0.0700877	0.993165	14.0296	-0.081029	0	0.976029	13.5406	-0.0906813	0	0.991007	13.9602	-0.0862364
O15156-2	ZBTB7B		1									1	0.886787	0.771856	0.846797	0.576365	0.500702	0.357874	0.229686									1	0.926631	0.870787	0.821851	0.603569	0.443504	0.360145	0.299263					13.691	-0.0704428	0	0.885752					13.8621	-0.0694298
O15160	POLR1C	23	15	1	1.06049	1.02332	0.851693	0.416913	0.156605	0.0824589	0.0721414	1	1.017	1.01538	0.815469	0.450703	0.184282	0.0914853	0.0810596	1	1.01046	0.968517	0.796956	0.38863	0.155931	0.0732004	0.0475198	1	0.999823	1.04062	0.822763	0.401059	0.188349	0.0947551	0.0572241	11.3406	-0.16518	0.0252853	0.996585	11.4335	-0.14217	0	0.998463	11.032	-0.155	0	0.999174	11.2482	-0.151365
O15162	PLSCR1	3	4	1	0.880006	0.990604	1.04922	0.967655	1.19417	1.67256	1.18689	1	1.0182	1.07544	0.991412	0.889539	1.13547	1.40885	1.602	1	1.10521	0.908718	0.716581	1.00787	1.25133	1.21434	0.966042	1	0.997586	1.02191	0.920632	1.04096	1.1218	1.17657	1.31758		1.0386	1.42972	0.685584		0.138521	1.5	0.922519						0.0361822
O15164	TRIM24	13	6	1	0.981675	1.0349	0.89184	0.513133	0.258582	0.133288	0.0853368	1	1.02462	1.08289	0.936813	0.543255	0.318694	0.159463	0.0909292	1	0.976653	1.03027	0.907159	0.498136	0.267403	0.126694	0.0679242	1	1.01805	1.07824	0.979408	0.552079	0.308264	0.135684	0.0619454	12.1568	-0.135424	0.0159782	0.998445	12.6064	-0.128931	0.0231092	0.991462	12.1498	-0.137253	0.00700037	0.99758	12.6764	-0.139307
O15169	AXIN1	5	4	1	0.995402	0.990842	0.880479	0.52543	0.33352	0.270212	0.165323	1	1.05994	1.0307	0.832377	0.417075	0.194418	0.0907225	0.0490149	1	1.02265	1.06496	0.924279	0.516033	0.342553	0.279674	0.138462	1	0.959233	0.983522	0.786887	0.432281	0.152557	0.0842032	0.0437857	12.4399	-0.115819	0.122666	0.997266	11.3692	-0.149016	0	0.996363	12.4736	-0.12674	0.142177	0.987321	11.1655	-0.149086
O15173-2	PGRMC2	24	33	1	1.08112	1.10669	1.00467	0.825027	0.949531	1.13635	0.892019	1	0.996615	1.0521	0.945666	0.834679	1.03662	1.27467	1.20667	1	1.02126	1.09839	0.996788	0.846539	0.97776	0.874578	0.671357	1	1.00122	1.05947	0.96875	0.90527	0.960645	1.10859	1.08574		-0.047733	0.950787	0.118934		0.612311	1.24067	0.743026			0	0.736367		0.0547466
O15182	CETN3	8	9	1	0.888484	0.88655	0.776626	0.541449	0.626175	0.790269	0.706049	1	0.948259	0.884904	0.820446	0.508355	0.630148	0.801832	0.925706	1	0.967701	1.00676	0.925305	0.688851	0.722266	0.777099	0.759322	1	0.974999	0.95092	0.899202	0.624954	0.710669	0.808537	0.853812		-0.0949986	0.673533	0.659606		-0.103718	0.732614	0.431366		-0.671231	0.736884	0.953083		-0.644806
O15194	CTDSPL	3	4	1	0.917361	0.95245	0.795483	0.394137	0.19645	0.108361	0.0591376	1	0.988883	0.993565	0.912679	0.451435	0.217482	0.118752	0.0675957	1	0.970803	1.00392	0.81844	0.46224	0.212693	0.13061	0.0645214	1	0.93376	1.01647	0.834624	0.411207	0.221423	0.137151	0.073257	11.1253	-0.141063	0	0.992543	11.7624	-0.162625	0.0493537	0.999082	11.5696	-0.134131	0	0.998744	11.3719	-0.145936
O15197	EPHB6	1		1	1.09024	0.975915	0.842622	0.374345	0.150998	0.0621491	0.0469403									1	1.12643	0.993088	0.78727	0.410632	0.159591	0.0684275	0.022375									11.1331	-0.16998	0.00841213	0.993927					11.0824	-0.154421	0	0.987568
O15211	RGL2	2	1	1	1.08423	0.914394	0.807215	0.454376	0.237918	0.158913	0.144118	1	0.947055	1.15284	0.950206	0.445295	0.164382	0.0820774	0.0551956	1	0.956147	1.00624	0.819952	0.441882	0.239248	0.143053	0.07481	1	1.00954	1.0442	0.789442	0.414816	0.203821	0	0	11.4809	-0.12663	0.0540265	0.987578	11.737	-0.200745	0.0495368	0.982126	11.556	-0.129391	0.000782684	0.997766	11.1504	-0.158875
O15212	PFDN6	23	23	1	0.975026	0.990226	0.910308	0.842067	1.00723	1.18447	1.00994	1	0.979839	0.99178	0.913558	0.782243	1.04595	1.28442	1.24783	1	0.995341	1.02319	0.98171	0.889318	1.09247	0.999236	0.839617	1	0.952007	1.07554	0.9299	0.886968	1.00246	1.19949	1.10539						0.633591	1.26612	0.70853			0.00526583	0.500206		0.381989
O15213	WDR46	4	2	1	0.973231	1.01447	0.76953	0.301927	0.180874	0.19223	0.130967	1	1.14168	0.99056	0.723665	0.35364	0.174608	0.105202	0.148215	1	0.936684	0.984904	0.685972	0.293246	0.168321	0.0856815	0.063023	1	1.09181	0.90599	0.703764	0.280909	0.178853	0.134143	0.0959718	10.3979	-0.201194	0.146764	0.997826	10.5181	-0.15725	0.0820189	0.982751	10.2157	-0.156831	0.0214144	0.99629	10.1849	-0.16278
O15226-2	NKRF	14	11	1	1.03465	0.92598	0.735895	0.307826	0.130565	0.0805818	0.0507538	1	0.977212	0.922214	0.699153	0.250372	0.10754	0.0670021	0.0184935	1	1.00552	1.00346	0.694322	0.286918	0.146967	0.0968965	0.0538886	1	0.996504	0.957088	0.672805	0.271186	0.123282	0.0745955	0.0477676	10.4379	-0.161255	0.00486881	0.99589	10.0886	-0.176399	0	0.995845	10.2061	-0.167141	0.0320961	0.999554	10.0466	-0.164421
O15228	GNPAT	21	20	1	0.979138	0.955914	0.784023	0.348109	0.165666	0.067021	0.0521757	1	1.01948	0.944216	0.738173	0.342521	0.100466	0.0364392	0.0241572	1	0.972094	0.967981	0.788938	0.345557	0.132697	0.0732051	0.0546086	1	0.984576	0.963383	0.717802	0.330072	0.109569	0.0450894	0.0380763	10.8358	-0.156444	0	0.998263	10.5208	-0.169812	0	0.996106	10.7937	-0.166852	0.0117353	0.998733	10.4089	-0.165421
O15230	LAMA5	4	8	1	0.941464	0.839204	0.774393	0.437059	0.253207	0.202832	0.119311	1	1.06628	1.08448	0.999331	0.622275	0.450641	0.49668	0.2562	1	1.00054	0.954341	0.798981	0.501796	0.300711	0.206373	0.126771	1	0.944048	0.939615	0.837842	0.536778	0.469488	0.326279	0.233561	11.278	-0.108411	0	0.973748	13.7985	-0.119499	0.343126	0.947856	11.9699	-0.105898	0	0.998705	13.4071	-0.0774702
O15231-3	ZNF185	25	11	1	0.977818	1.29827	0.917425	0.655974	0.7872	0.576408	0.287226	1	1.00745	1.04669	0.984115	0.75812	0.869662	0.802132	0.383614	1	1.03928	1.06635	0.975028	0.781276	0.746263	0.529232	0.271613	1	1.02203	1.04675	0.971071	0.798611	0.802228	0.693193	0.380988	18.1015	-0.0560635	0	0.767036	20.1662	-0.113646	0	0.785285	17.6995	-0.071334	0	0.951094	20.1809	-0.0545601
O15234	CASC3	10	3	1	0.983689	1.77533	0.980619	0.83155	1.03189	1.17208	0.868692	1	0.982035	1.06534	1.04401	0.854146	0.964549	1.13777	0.966358	1	1.05557	1.0829	1.03258	0.906569	1.06362	0.955156	0.744536	1	1.00426	1.07564	0.913868	0.894938	0.892111	1.04743	0.926114		0	0	-0.0552142		0.018332	1.00536	0.00299688		-0.324563	0.744534	0.729288		-0.208194
O15235	MRPS12	10	4	1	1.06651	1.15663	0.862596	0.473119	0.388361	0.33045	0.233748	1	1.06918	0.973462	0.769469	0.440056	0.313582	0.258587	0.185622	1	1.05107	1.01457	0.856839	0.458524	0.36826	0.287606	0.199033	1	1.01535	0.975466	0.696678	0.403006	0.267251	0.256682	0.181292	11.9761	-0.134907	0.26519	0.963036	11.456	-0.116035	0.13674	0.993449	11.9202	-0.128061	0.206496	0.990575	10.764	-0.125103
O15254	ACOX3	15	14	1	1.00024	1.26313	0.931567	0.705787	0.83437	0.979412	0.760849	1	1.0349	1.06511	0.944291	0.799854	0.960583	1.14563	1.01564	1	1.0276	1.06145	0.987173	0.799792	0.9201	0.908173	0.720499	1	1.02454	1.09077	0.975841	0.826998	0.802923	0.954218	0.913396		-0.461959	0.820104	0.472352		-0.0946318	0.973199	0.0482225		-0.0165668	0	0.649968		-0.322925
O15258	RER1	6	7	1	0.987458	0.971656	0.784319	0.404514	0.20823	0.127061	0.0815107	1	1.02424	1.00501	0.799115	0.416281	0.165761	0.0864431	0.0458018	1	0.963205	1.03155	0.80713	0.408419	0.245027	0.133935	0.0905327	1	0.967035	0.9599	0.74494	0.387059	0.162342	0.0776726	0.0720051	11.1503	-0.135163	0.0103237	0.99954	11.1799	-0.149884	0	0.998915	11.313	-0.137551	0.0388123	0.996666	10.8061	-0.144163
O15259-4	NPHP1		2									1	0.941027	1.04061	0.854146	0.445286	0.258922	0.263466	0.149884									1	1.0537	1.05336	0.817615	0.39391	0.273216	0.226449	0.137434					11.5478	-0.148898	0.165859	0.990078					11.1855	-0.152163
O15260	SURF4	13	8	1	0.996612	0.971426	0.800975	0.430859	0.208328	0.10285	0.0556616	1	0.977628	1.0728	0.879292	0.559175	0.437749	0.394682	0.297282	1	0.986672	1.0104	0.821621	0.448654	0.206894	0.0934045	0.0570825	1	1.04118	1.04132	0.90868	0.513308	0.349886	0.310182	0.268199	11.3204	-0.138577	0	0.999209	13.1338	-0.106668	0.298351	0.985852	11.4842	-0.141856	0	0.999217	12.1836	-0.145795
O15264	MAPK13	11	13	1	1.00232	1.19238	0.907319	0.566787	0.209609	0.0666684	0.0396072	1	0.980082	0.984754	0.921726	0.593252	0.238202	0.0519931	0.0340892	1	0.998272	1.04411	0.982703	0.771334	0.513149	0.0936175	0.0382363	1	0.991493	0.995557	0.943815	0.783525	0.593583	0.130451	0.0397284	12.3399	-0.162609	0	0.974297	12.5456	-0.164155	0	0.997389	14.4387	-0.149387	0	0.98272	14.9669	-0.146973
O15265-2	ATXN7	2	1	1	0.944628	0.910173	0.744364	0.426578	0.310471	0.287239	0.236568	1	1.07732	0.925074	0.699249	0.270298	0.0940588	0.0572458	0.029169	1	0.982599	1.00467	0.814617	0.48055	0.307762	0.241968	0.21113	1	1.02515	0.910446	0.699181	0.250385	0.126281	0.0752392	0.0577134	11.2536	-0.10965	0.162712	0.988314	10.1288	-0.175253	0	0.992828	11.7707	-0.123299	0.162208	0.999504	10.0704	-0.178135
O15269	SPTLC1	18	17	1	0.993944	0.976173	0.769024	0.354445	0.127743	0.0473502	0.0292317	1	0.991669	0.918217	0.728124	0.383165	0.133896	0.0550263	0.0197648	1	1.01036	0.97795	0.754567	0.340697	0.125329	0.0618349	0.0346823	1	0.995866	0.946977	0.73186	0.370456	0.14835	0.0559052	0.0363602	10.7404	-0.16616	0	0.998977	10.6382	-0.154087	0	0.992587	10.6355	-0.164106	0	0.99944	10.6455	-0.152843
O15270	SPTLC2	28	14	1	0.995551	0.996882	0.808919	0.371423	0.134479	0.0665183	0.0430706	1	0.967196	0.925544	0.779705	0.362626	0.118829	0.0183289	0.0322065	1	1.01803	0.972787	0.776548	0.355596	0.142733	0.0720191	0.0506974	1	0.982983	0.968361	0.7735	0.362053	0.128616	0.0484955	0.0194641	10.9889	-0.165027	0	0.99984	10.7846	-0.171053	0	0.993302	10.8078	-0.158478	0	0.999357	10.7848	-0.166205
O15287	FANCG	9	12	1	1.13167	1.06737	0.886325	0.411863	0.149502	0.0985652	0.0755034	1	1.0071	1.00595	0.821095	0.376076	0.161768	0.09487	0.0465291	1	1.03986	0.952917	0.767094	0.345809	0.140578	0.0918719	0.0722171	1	1.04979	0.994237	0.801762	0.373114	0.162248	0.0890716	0.0629734	11.397	-0.183168	0.0528728	0.985298	11.0839	-0.161035	0.0148171	0.999752	10.7002	-0.161023	0.0251531	0.997308	10.9911	-0.158086
O15294	OGT	45	30	1	1.06442	1.07241	0.876351	0.521014	0.242894	0.109973	0.0469998	1	0.990533	0.998032	0.852822	0.478376	0.211725	0.0683239	0.0365298	1	1.02402	1.0245	0.871071	0.489894	0.238144	0.0993722	0.0526225	1	1.01186	1.00533	0.874457	0.492753	0.209186	0.081061	0.0418625	12.1082	-0.140673	0	0.992148	11.7276	-0.149709	0	0.998347	11.9187	-0.141603	0	0.99845	11.8735	-0.150809
O15297	PPM1D	1	1	1	0.95796	0.944464	0.865899	0.540955	0.183328	0.0881319	0.00669649	1	1.54561	1.06841	0.972666	0.426422	0.265977	0.100504	0.0589911	1	0.862335	0.97895	0.789601	0.665009	0.177523	0.058905	0.0534621	1	1.26671	1.65996	1.02537	0.80691	0.208927	0.112399	0	12.0493	-0.157724	0	0.991829	11.8104	-0.178691	0.0709782	0.846689	12.5792	-0.162114	0	0.952937	13.3854	-0.23293
O15304	SIVA1	1	1	1	0.937643	0.928605	0.856625	0.375031	0.0984759	0.0279212	0.0105127	1	0.953867	1.0493	0.825386	0.299408	0.0801679	0.034828	0.0128658	1	1.06407	1.00493	0.803199	0.321774	0.125971	0.0306765	0.0186941	1	1.07452	0.96749	0.763581	0.33238	0.0985133	0.0411815	0.0575033	11.1308	-0.191761	0	0.992859	10.7266	-0.203557	0	0.996839	10.7611	-0.182017	0	0.996827	10.6096	-0.172502
O15305	PMM2	28	20	1	0.931398	0.943145	0.851938	0.650303	0.445151	0.111614	0.0295516	1	0.990275	1.03679	0.928065	0.757153	0.625486	0.256401	0.027808	1	0.986291	1.00777	0.934154	0.770685	0.508007	0.164024	0.0428619	1	0.986039	1.02861	0.946711	0.798159	0.657387	0.260918	0.0493108	13.3247	-0.122448	0	0.964178	15.2117	-0.121492	0	0.962412	14.4836	-0.134066	0	0.987011	15.6486	-0.131995
O15315	RAD51B	5	2	1	1.0728	1.02571	0.819995	0.497941	0.237982	0.201815	0.146918	1	1.02169	0.97676	0.802498	0.380036	0.195762	0.0931892	0.0510097	1	1.03544	0.972356	0.822101	0.512911	0.273731	0.173029	0.121996	1	1.03744	1.26062	0.878203	0.388775	0.144477	0.103485	0.0565938	11.7706	-0.127573	0.0824625	0.992596	11.0952	-0.146808	0	0.999009	12.0157	-0.11396	0	0.998258	11.2774	-0.187384
O15318	POLR3G	5	5	1	0.962644	0.919373	0.872542	0.722026	0.624952	0.534837	0.354339	1	0.96668	1.02557	0.914488	0.744975	0.681915	0.619006	0.453652	1	0.987145	1.05172	1.00707	0.780662	0.696315	0.520988	0.319602	1	0.989752	1.06854	1.00642	0.856152	0.68873	0.635182	0.473451	17.6794	-0.0523532	0	0.965751	20.7565	-0.0434623	0	0.970647	17.7161	-0.0653018	0	0.973309	20.8576	-0.0514287
O15320-5	CTAGE5	28		1	0.94963	0.972779	0.910556	0.751126	0.842109	0.815693	0.471484									1	0.997274	1.04879	1.03269	0.875715	0.94622	0.777322	0.424331										-0.0316759	0	0.708626					20.3503	-0.115949	0	0.937502
O15320-8	CTAGE5		26									1	1.00931	1.04459	0.985927	0.787618	0.97221	0.965432	0.571848									1	1.01085	1.06638	1.02833	0.837879	0.892737	0.867292	0.553528							0	0.7292						-0.0738089
O15327	INPP4B	3	9	1	0.950962	1.00995	0.832293	0.526435	0.239184	0.0978845	0.0673424	1	1.01786	1.01816	0.926779	0.550958	0.277506	0.108249	0.0408191	1	1.00356	0.977452	0.876495	0.65181	0.258805	0.0950356	0.0294516	1	0.994172	1.01808	0.902278	0.579192	0.264609	0.110625	0.0499637	11.9595	-0.134159	0	0.995035	12.4633	-0.142893	0	0.998149	12.8411	-0.152349	0	0.993004	12.5226	-0.141435
O15344	MID1	15	16	1	1.06128	1.05592	0.891976	0.45819	0.189911	0.0936662	0.0537338	1	0.969218	0.938248	0.810117	0.372524	0.129465	0.072162	0.043199	1	1.04662	1.05152	0.859735	0.438351	0.174976	0.0980496	0.0603644	1	0.983426	0.984425	0.865685	0.397308	0.141189	0.0715578	0.0489696	11.7248	-0.160141	0.0157766	0.994991	10.983	-0.164161	0	0.99642	11.5102	-0.157403	0.0167005	0.99625	11.2903	-0.175023
O15347	HMGB3	15	12	1	1.05738	1.11709	0.979438	0.907927	0.982712	1.06446	0.784424	1	0.997525	1.16869	1.05277	0.911193	1.13986	1.38558	1.31681	1	1.03869	1.00319	0.914415	0.807116	0.880126	0.699055	0.503522	1	1.03672	0.979003	0.928558	0.796544	0.951153	0.956544	0.968403		0	0	0.597446		0	1.35119	0.781049		-0.0400343	0	0.879561		-0.0555377
O15350	TP73		1									1	1.08327	1.05137	0.868381	0.383838	0.149941	0.101037	0.0569873									1	0.946932	0.949366	0.808967	0.405523	0.185042	0.110787	0.0763514					11.2281	-0.180854	0.0443381	0.993184					11.1903	-0.145236
O15355	PPM1G	43	37	1	0.9779	0.987289	0.885424	0.664468	0.430829	0.209917	0.0789105	1	0.999723	1.02928	0.911595	0.72947	0.554548	0.336967	0.126596	1	0.989721	0.980509	0.891276	0.677852	0.45095	0.210978	0.0823896	1	1.03189	1.02503	0.934936	0.748593	0.519031	0.300814	0.147235	13.5987	-0.10952	0	0.990612	14.952	-0.0923741	0	0.982529	13.7742	-0.109195	0	0.98968	14.8319	-0.0974157
O15357	INPPL1	23	24	1	1.01329	1.02467	0.9497	0.628989	0.260376	0.0960736	0.0684103	1	0.975821	1.03247	0.94546	0.617196	0.279706	0.0904963	0.0713085	1	0.994904	1.01269	0.933896	0.644143	0.25417	0.0997533	0.0623352	1	1.02531	1.05675	0.960363	0.66895	0.299101	0.106846	0.0633612	12.8379	-0.154298	0.00565131	0.999045	12.8269	-0.147895	0	0.997806	12.8831	-0.153952	0	0.99903	13.1619	-0.149558
O15360	FANCA	15	12	1	0.981516	0.984483	0.783501	0.347871	0.148095	0.104133	0.0684133	1	1.02733	0.960306	0.792691	0.363627	0.171635	0.125723	0.107621	1	0.995042	0.98428	0.779559	0.320892	0.147934	0.0820226	0.0583802	1	0.968272	0.926279	0.759351	0.361553	0.160901	0.121385	0.0887924	10.778	-0.16526	0.03737	0.999507	10.8571	-0.163548	0.0735768	0.998248	10.6641	-0.172151	0.031111	0.999834	10.7423	-0.149496
O15370	SOX12	2	2	1	1.02639	0.968317	0.814068	0.651387	0.643794	0.617637	0.427397	1	1.02022	1.01415	1.03931	0.642237	0.627808	0.710166	0.570899	1	0.928732	1.03391	0.9491	0.719967	0.654477	0.551042	0.42021	1	1.01866	1.04951	0.991665	0.791561	0.653101	0.713942	0.520877	20.5782	-0.044556	0	0.954658		-0.771285	0.636291	0.960187	18.7305	-0.051739	0.0975192	0.965149		-0.0580866
O15371	EIF3D	55	53	1	1.0244	0.989588	0.864089	0.488358	0.138923	0.0597967	0.0458275	1	1.00767	0.991232	0.861401	0.504637	0.147459	0.0619721	0.0392523	1	1.01954	0.988322	0.860289	0.479196	0.14065	0.0525461	0.0360419	1	1.01089	0.961275	0.877859	0.530831	0.159157	0.0604469	0.0377382	11.7065	-0.166271	0	0.997051	11.7899	-0.164169	0	0.996894	11.6513	-0.167646	0	0.997379	11.9946	-0.166738
O15372	EIF3H	57	45	1	1.04575	1.02941	0.960687	0.737997	0.502869	0.241501	0.0880568	1	0.976057	1.02396	0.909857	0.757413	0.531148	0.296564	0.0641134	1	0.999227	0.991813	0.938122	0.73536	0.489461	0.231079	0.0879785	1	1.01064	1.02172	0.926751	0.782014	0.528125	0.283996	0.101516	14.5038	-0.112775	0	0.990441	14.7854	-0.108051	0	0.979705	14.3791	-0.113089	0	0.993081	14.9173	-0.108622
O15379	HDAC3	10	5	1	0.975216	1.03961	0.905702	0.550869	0.314174	0.104315	0.0702455	1	1.02613	1.06645	0.894456	0.556072	0.312958	0.104426	0.0367275	1	1.03388	1.02586	0.95041	0.638788	0.334661	0.110174	0.0579603	1	1.10743	1.04103	0.920364	0.593011	0.323374	0.132893	0.0502575	12.5113	-0.132195	0	0.995193	12.4964	-0.135246	0	0.991796	13.1102	-0.13967	0	0.996563	12.8112	-0.132341
O15381	NVL	3	2	1	0.998018	1.08329	0.83665	0.426679	0.325822	0.189627	0.118277	1	0.927003	0.935598	0.739537	0.295506	0.0751562	0.124311	0.0391606	1	0.996973	1.03271	0.838225	0.436194	0.231233	0.154564	0.1004	1	1.03436	0.905268	0.690064	0.283829	0.108986	0.0933097	0.0377223	11.6797	-0.128882	0.0893997	0.987222	10.3434	-0.181464	0.0299751	0.988893	11.5005	-0.142881	0.0624384	0.998609	10.1244	-0.160233
O15382	BCAT2	22	23	1	0.934972	0.955103	0.869178	0.677074	0.761844	0.843268	0.668901	1	1.03791	1.08146	0.975263	0.69704	0.819697	0.99391	0.844055	1	0.990554	1.0414	0.943169	0.783921	0.949963	0.756334	0.610602	1	1.03314	0.991555	0.992863	0.768814	0.780328	0.796305	0.759251		-0.691094	0.737772	0.761577		-0.415764	0.838675	0.559407		-0.0282896	0	0.764254		-0.558535
O15392-2	BIRC5	4	5	1	1.04828	1.15567	1.00303	0.668548	0.432659	0.314778	0.133909	1	1.01048	1.06131	0.936057	0.625885	0.439487	0.308883	0.225533	1	1.03029	1.05146	0.947886	0.672825	0.507239	0.254993	0.146875	1	1.02581	1.02876	0.920328	0.563218	0.37646	0.281337	0.217681	14.1571	-0.101297	0.0146205	0.965489	13.7569	-0.0988109	0.136951	0.992846	14.2874	-0.0977431	0	0.988449	12.8305	-0.119291
O15397	IPO8	16	16	1	1.03107	0.959453	0.805828	0.377979	0.150113	0.0859185	0.0687351	1	0.983628	0.94622	0.78755	0.394429	0.155274	0.0754207	0.0479366	1	1.01428	0.998878	0.79956	0.354551	0.144344	0.0954557	0.0679264	1	0.995932	1.00237	0.802483	0.399785	0.157482	0.0700312	0.0414857	11.0006	-0.159708	0.0183974	0.998058	11.008	-0.15231	0	0.997515	10.8622	-0.168698	0.0358198	0.999742	11.1059	-0.156045
O15400	STX7	19	11	1	0.98413	1.00308	0.936338	0.803735	0.860556	0.987758	0.869662	1	1.0257	1.07546	0.979882	0.866927	1.11001	1.44226	1.42052	1	0.996957	1.01641	0.962433	0.82238	0.902328	0.816734	0.701767	1	1.01712	1.06488	1.00482	0.885947	1.02321	1.25197	1.2803		-0.286439	0.880428	0.556197		1.01989	1.43139	0.918475		-0.0201333	0	0.855308		0.107827
O15403	SLC16A6		1									1	1.38273	1.14119	1.32157	0.503164	0.765918	0.411335	0.812562									1	0.923957	1.22561	1.22787	0.728697	0.308898	0.51922	0.506476						-0.158212	0.62599	0.54688					12.2238	-1.42059
O15417	TNRC18	5		1	0.980575	1.03758	0.814278	0.383384	0.278506	0.197105	0.135577									1	1.02086	0.981076	0.811185	0.427887	0.278685	0.167871	0.155766									11.1427	-0.151887	0.139372	0.995088					11.416	-0.133297	0.101027	0.998496
O15427	SLC16A3	17	14	1	1.00212	0.902315	0.766561	0.404653	0.150346	0.0456879	0.0230538	1	0.977144	0.84827	0.699222	0.398091	0.143109	0.0356884	0.0195664	1	0.979392	0.943953	0.751785	0.38923	0.153667	0.0574951	0.02603	1	0.950512	0.912299	0.7082	0.397766	0.143748	0.0624762	0.0248268	10.9163	-0.154706	0	0.990369	10.4871	-0.147412	0	0.976786	10.812	-0.152961	0	0.995692	10.5949	-0.147038
O15431	SLC31A1	1	1	1	0.993679	1.08248	0.888092	0.490628	0.23295	0.140088	0.0291611	1	0.968277	0.807544	0.748831	0.487044	0.214131	0.105496	0.0439613	1	1.05781	1.08505	0.88807	0.494883	0.237931	0.0694058	0.0425423	1	0.889635	0.85889	0.716748	0.462309	0.24611	0	0	11.9955	-0.141889	0	0.992824	11.2055	-0.125614	0	0.960966	11.9796	-0.150127	0	0.990995	10.9674	-0.137263
O15438-4	ABCC3	3	4	1	0.988815	1.03817	0.87043	0.445902	0.207082	0.108377	0.0675947	1	1.01485	0.98992	0.866755	0.432265	0.20918	0.169062	0.107857	1	0.925666	1.07009	0.869578	0.471862	0.214312	0.113761	0.0596362	1	1.09456	1.07746	0.920048	0.504558	0.262392	0.150732	0.118363	11.629	-0.15189	0.0244613	0.998544	11.4823	-0.158771	0.0940943	0.999121	11.7944	-0.144248	0.00383956	0.991319	12.1098	-0.150809
O15439	ABCC4	20	24	1	0.879241	0.826461	0.706258	0.345463	0.127999	0.0541219	0.0315727	1	0.983174	0.969631	0.794247	0.400907	0.186777	0.086599	0.0739108	1	0.969565	0.964067	0.79794	0.39892	0.158798	0.0697963	0.0433899	1	1.00121	1.00387	0.810768	0.40443	0.171359	0.0945075	0.0669943	10.3265	-0.151769	0	0.962649	11.127	-0.143558	0	0.999067	11.0767	-0.154369	0	0.998033	11.1825	-0.150713
O15440	ABCC5	3	4	1	1.01631	0.947251	0.871207	0.436338	0.169139	0.0826154	0.0524316	1	1.0061	1.15192	0.924142	0.448129	0.353019	0.313777	0.285014	1	1.04844	1.02583	0.879335	0.390391	0.147343	0.0779821	0.0514794	1	0.885633	0.981132	0.762928	0.480972	0.277048	0.237876	0.206052	11.5269	-0.159988	0.00571622	0.997773	11.5978	-0.190338	0.303786	0.974239	11.2999	-0.182258	0.0303745	0.997861	11.542	-0.114742
O15446-2	CD3EAP	21	8	1	0.952359	0.905202	0.738951	0.41775	0.358229	0.388332	0.284989	1	1.1066	0.942155	0.789956	0.404223	0.366607	0.421644	0.339469	1	0.968534	0.934679	0.747172	0.412087	0.38269	0.318657	0.259135	1	1.01877	0.985395	0.773148	0.394251	0.350083	0.3338	0.312428	11.3337	-0.111123	0.267076	0.977372	10.4787	-0.235461	0.374206	0.974764	11.3189	-0.115302	0.237401	0.989355	10.6661	-0.188705
O15455	TLR3	1	2	1	1.05538	1.08911	0.875236	0.573917	0.285543	0.0632259	0.0621673	1	0.922922	0.945926	0.859451	0.441454	0.339583	0.173834	0.169466	1	0.935438	1.02848	0.870521	0.461079	0.241761	0.107171	0.0769553	1	0.998054	1.0693	0.975942	0.536403	0.290675	0.203184	0.130406	12.4472	-0.140677	0	0.986636	11.7892	-0.12925	0.118994	0.984028	11.784	-0.141128	0.0135364	0.995031	12.3904	-0.160186
O15460	P4HA2	27	18	1	1.01112	1.04422	0.92887	0.559919	0.300818	0.126912	0.0641291	1	1.02846	1.04222	0.912487	0.514533	0.261248	0.137262	0.0607684	1	1.04762	1.05962	0.956125	0.610029	0.31119	0.149642	0.0714874	1	1.03653	1.07126	0.94548	0.554395	0.281408	0.128888	0.0591515	12.5998	-0.134231	0	0.997044	12.2424	-0.137131	0.00279955	0.997067	12.9611	-0.133315	0	0.994688	12.5586	-0.139235
O15479	MAGEB2	23	16	1	0.964216	1.01479	0.803258	0.443339	0.257238	0.128946	0.0495013	1	1.0551	1.01183	0.840552	0.502862	0.367777	0.261659	0.141481	1	0.957711	0.960011	0.796699	0.431844	0.254675	0.12194	0.0553139	1	1.02162	0.984716	0.788223	0.412585	0.273803	0.179382	0.114443	11.5123	-0.129753	0	0.996542	12.4879	-0.099132	0.017751	0.991877	11.4027	-0.129325	0	0.995833	11.3266	-0.125671
O15498	YKT6	23	20	1	1.01269	1.03602	0.971806	0.866808	0.988855	0.819797	0.258714	1	0.988918	0.972459	0.887561	0.861098	1.08122	1.05485	0.285772	1	0.989852	1.02948	0.98086	0.886019	1.01077	0.740365	0.225997	1	1.05209	1.02947	0.976185	0.943888	1.08071	1.00059	0.366253	19.6559	-0.211965	0	0.95701	20.8641	0	0	0.907442	18.207	-1.2007	0.225997	0.972189	20.7186	-0.533092
O15504	NUPL2	2	4	1	1.00426	1.03779	0.848366	0.534449	0.423092	0.252042	0.12292	1	0.936558	0.996349	0.885509	0.481683	0.335991	0.248882	0.0828357	1	1.10177	1.11165	0.987686	0.563181	0.408716	0.234211	0.13335	1	1.04645	1.09598	0.925067	0.535623	0.37826	0.235257	0.111756	12.8717	-0.0962623	0	0.989001	12.3541	-0.110999	0.0133061	0.985111	13.1814	-0.116092	0.0755767	0.96942	12.8753	-0.110264
O15511	ARPC5	18	13	1	0.975638	1.05962	0.922811	0.772608	0.830585	0.819843	0.593671	1	0.984848	0.966807	0.899411	0.796152	0.923573	0.983565	0.7518	1	1.01394	1.01683	0.997368	0.841101	0.87612	0.717509	0.475915	1	1.00367	0.99242	0.956672	0.853667	0.913809	0.924922	0.71166		-0.0258039	0	0.802425		-0.0393896	0.864627	0.40758		-0.0566628	0	0.928568		-0.0161244
O15514	POLR2D	16	11	1	0.972306	1.00684	0.99571	0.808004	1.02786	1.18438	0.731141	1	1.04573	1.07414	0.985965	0.851485	1.25993	1.39993	0.922007	1	0.998513	1.06627	1.01283	0.892215	1.04167	0.934523	0.584696	1	1.03711	1.0478	1.02133	0.933774	1.08992	1.17103	0.949317		-0.154906	0.937846	0.0450769		0.022769	1.14393	0.166692						0.0223284
O15516	CLOCK	2	4	1	1.00611	0.957562	0.838351	0.414985	0.101281	0.0160386	0.0171114	1	0.955076	0.991561	0.825297	0.435786	0.250238	0.190618	0.175749	1	1.06951	0.968594	0.865951	0.40718	0.0931644	0.0388278	0.0263466	1	0.946873	0.995402	0.855945	0.463897	0.253489	0.187474	0.153675	11.2293	-0.182707	0	0.99577	11.3823	-0.145644	0.139462	0.997876	11.2975	-0.18861	0	0.995008	11.6778	-0.142658
O15527-4	OGG1	1	1	1	0.856648	0.904774	0.872772	0.414842	0.376866	0.376741	0.26772	1	1.01778	0.946902	0.781782	0.384155	0.268365	0.0319489	0.11239	1	1.15666	1.10602	1.07948	0.596485	0.563046	0.364128	0.315611	1	0.903505	0.928114	0.812254	0.417487	0.145702	0	0	11.1808	-0.193756	0.329477	0.941835	11.1067	-0.134098	0	0.987226	13.9781	-0.119893	0.344299	0.916891	11.168	-0.171015
O15528	CYP27B1		1									1	0.961637	1.01668	0.814545	0.388242	0.205049	0.180704	0.117056									1	0.86967	0.966395	0.793393	0.395358	0.261724	0.103467	0.0817371					11.0688	-0.16007	0.109467	0.997443					11.2467	-0.130105
O15530	PDPK1	21	14	1	1.00237	0.998577	0.841146	0.407251	0.167796	0.0730979	0.0442571	1	1.02955	1.04317	0.84649	0.40344	0.149636	0.0618404	0.0187115	1	0.997403	1.00115	0.839356	0.408337	0.154051	0.0821314	0.0497647	1	0.991046	1.0261	0.876444	0.407782	0.153065	0.0582737	0.0284156	11.3027	-0.15869	0	0.999949	11.2794	-0.168769	0	0.997655	11.2816	-0.159889	0.00310272	0.999869	11.4027	-0.173068
O15533-3	TAPBP	6	5	1	0.890121	1.12716	0.834122	0.604698	0.531554	0.478324	0.282154	1	1.08234	1.0676	0.838577	0.703688	0.6523	0.589634	0.340095	1	1.00895	1.08158	0.929873	0.705538	0.653149	0.558853	0.283366	1	0.982172	1.02702	0.802258	0.612115	0.472646	0.422409	0.30282	14.977	-0.0696242	0.146886	0.921848	18.1522	-0.0506584	0	0.926077	17.2473	-0.0594194	0	0.941261	14.2976	-0.0718642
O15534	PER1	14	6	1	1.0104	1.02186	0.875068	0.589027	0.396121	0.270377	0.163829	1	0.930635	0.977395	0.950063	0.52861	0.551261	0.346883	0.170489	1	1.03319	1.01741	0.929864	0.619989	0.40868	0.247618	0.159518	1	1.0212	1.07466	0.964867	0.63206	0.502063	0.343089	0.249305	13.2488	-0.0939963	0	0.997813	14.089	-0.081462	0	0.944627	13.5378	-0.100443	0.0106335	0.997002	14.3498	-0.0899808
O15541	RNF113A	6	5	1	0.956735	1.00507	0.919181	0.623101	0.563865	0.46228	0.248081	1	0.931823	1.05695	0.916284	0.488679	0.502681	0.342733	0.240773	1	0.999393	1.12375	0.970845	0.796837	0.63528	0.422287	0.272675	1	0.997093	1.05191	0.802704	0.508344	0.318216	0.232575	0.151491	15.4089	-0.0671872	0	0.966967	12.8972	-0.110217	0.260956	0.957118	16.543	-0.0764216	0	0.972926	12.1124	-0.107153
O15550	KDM6A	4	3	1	1.05417	1.25369	1.05442	0.596131	0.380961	0.225519	0.15693	1	0.999502	1.03735	0.862328	0.506925	0.241097	0.0778756	0.0210001	1	0.972829	1.01003	0.850159	0.499357	0.272834	0.137227	0.0698071	1	0.987019	0.983356	0.928832	0.483207	0.2483	0.100028	0.0291336	13.0799	-0.143634	0.154756	0.936232	11.9622	-0.14649	0	0.995895	12.0041	-0.12702	0	0.998413	12.0645	-0.150401
O15551	CLDN3	3	4	1	1.01131	1.0113	0.981515	0.841133	1.04581	1.18436	1.005	1	0.999149	1.08366	1.06797	0.778557	1.17946	1.45078	1.19176	1	0.966197	1.04705	0.969566	0.886086	1.05751	0.968617	0.772198	1	1.05325	1.12167	1.05071	0.9068	1.0723	1.19408	1.19598		0.0112013	1.08396	0.212377		0.746711	1.32127	0.640832			0.143784	0.652731		0.152964
O15554	KCNN4	2	1	1	1.1738	1.14172	0.948698	0.512863	0.202033	0.0516536	0.0383065	1	0.953711	0.95051	0.69949	0.373156	0.0908909	0.0356379	0.00307808	1	0.983218	0.946391	0.722283	0.345717	0.15802	0.0545358	0.0281386	1	1.18017	0.982402	0.739838	0.334843	0.126461	0.0435412	0.0151223	12.1364	-0.172513	0	0.969381	10.4243	-0.163966	0	0.990275	10.5263	-0.15432	0	0.997116	10.544	-0.167459
O43143	DHX15	95	91	1	1.03914	1.03374	0.971179	0.852115	0.918019	0.932637	0.582457	1	0.997234	1.02675	0.941438	0.805674	0.976449	1.06613	0.739456	1	1.01791	1.03551	0.953352	0.830164	0.918044	0.741724	0.453503	1	1.03667	1.0549	0.990029	0.864249	0.932336	0.941154	0.731619			0	0.796366		-0.275874	0.896926	0.233553	20.6707	-0.0803815	0	0.8873		-0.0199865
O43148-2	RNMT	26	28	1	0.890212	0.900722	0.836539	0.595146	0.407845	0.180449	0.0921684	1	0.988207	1.0274	0.91311	0.673273	0.483705	0.223954	0.0519003	1	0.977131	1.03604	0.963641	0.752312	0.457982	0.217905	0.111279	1	0.984569	1.01242	0.925595	0.692199	0.497456	0.225201	0.067802	12.8783	-0.104627	0	0.964148	13.9363	-0.110721	0	0.982994	14.3437	-0.116793	0	0.996949	14.1391	-0.110556
O43149	ZZEF1	28	24	1	1.00681	1.01964	0.828683	0.451274	0.267113	0.208142	0.171194	1	1.01474	1.01614	0.855547	0.425725	0.219258	0.1386	0.0907823	1	1.01038	1.01988	0.86468	0.454719	0.261815	0.206009	0.155386	1	0.959513	0.972962	0.838828	0.423103	0.212477	0.130804	0.084871	11.5366	-0.138759	0.138793	0.999342	11.4724	-0.151849	0.0615418	0.999256	11.6507	-0.147544	0.138893	0.999071	11.412	-0.146081
O43150	ASAP2	4	8	1	0.964071	1.04369	0.931622	0.60134	0.313077	0.25912	0.232946	1	1.03267	1.13053	0.978158	0.683843	0.314719	0.160352	0.0823737	1	0.992384	1.04955	0.999829	0.649479	0.31434	0.235436	0.183363	1	1.04305	1.08593	0.993624	0.679727	0.27689	0.167295	0.0886522	12.7352	-0.14384	0.205737	0.99561	13.3273	-0.143955	0.0286778	0.985632	13.003	-0.165729	0.182613	0.996651	13.1224	-0.165769
O43156	TTI1	16	18	1	0.990759	0.959901	0.795516	0.358855	0.127804	0.0509813	0.0390889	1	0.967861	0.918674	0.776377	0.38131	0.1214	0.0414411	0.0249916	1	0.992424	0.973638	0.795671	0.375732	0.126717	0.0544756	0.035048	1	0.970465	0.940221	0.762167	0.380757	0.136595	0.0582948	0.0358491	10.8668	-0.167895	0	0.998651	10.8447	-0.164724	0	0.99264	10.9317	-0.165904	0	0.998913	10.8084	-0.156966
O43157	PLXNB1	2	3	1	1.0429	1.03227	0.925183	0.447787	0.176592	0.0395046	0.0505012	1	1.05873	1.08717	0.959222	0.48577	0.283831	0.210526	0.128848	1	1.00387	0.967972	0.835245	0.432646	0.197232	0.0183161	0.0322673	1	0.996582	1.0068	0.877812	0.523377	0.238654	0.161341	0.124758	11.7324	-0.180208	0.0111759	0.997009	12.0524	-0.168153	0.151784	0.987303	11.4035	-0.159095	0	0.995314	12.0795	-0.138414
O43159	RRP8		2									1	0.942882	0.946708	0.799511	0.311093	0.229862	0.227399	0.150666									1	0.955807	0.997288	0.701218	0.330364	0.199042	0.175383	0.105482					10.5124	-0.206391	0.184557	0.991124					10.3813	-0.153922
O43164	PJA2	9	5	1	0.942078	0.989856	0.840722	0.541333	0.426714	0.318175	0.224997	1	0.976356	1.05353	0.892041	0.583534	0.496125	0.410985	0.30111	1	1.03663	0.977316	0.872429	0.6061	0.422184	0.297029	0.201156	1	1.00818	1.11303	0.904015	0.64774	0.426126	0.345714	0.246386	13.0968	-0.0872798	0.081119	0.991377	14.0437	-0.0880381	0.2616	0.984039	13.562	-0.0862866	0	0.997484	13.8737	-0.0945377
O43166	SIPA1L1		2									1	0.982395	0.923811	0.775818	0.428626	0.246196	0.170983	0.188019									1	1.06128	0.868401	0.829454	0.476575	0.293374	0.260965	0.15976					11.1825	-0.130237	0.10709	0.993834					11.9442	-0.104892
O43167	ZBTB24	3	4	1	0.972346	1.06857	0.874948	0.373994	0.225925	0.110079	0.0526721	1	1.03173	0.991423	0.758774	0.296486	0.0895031	0.0484073	0.056415	1	0.987235	0.966946	0.841558	0.394677	0.190982	0.125599	0.0664399	1	0.967932	0.976318	0.745306	0.303979	0.103344	0.0729718	0.0643382	11.3062	-0.167938	0.0538798	0.992336	10.451	-0.186295	0.0142034	0.998644	11.2492	-0.157363	0.0431346	0.998628	10.4221	-0.17862
O43169	CYB5B	25	25	1	1.00771	0.945328	0.913737	0.703028	1.10475	1.01819	1.02316	1	0.95377	1.08947	0.904469	0.687218	0.85242	0.990804	0.969914	1	0.934961	1.00855	0.933596	0.878685	1.06758	0.975513	0.958965	1	0.988172	1.03784	0.955987	0.73197	0.782863	0.888452	0.795153		-0.15061	0.951367	0.0408516		-0.334471	0.875089	0.328691		-0.151829	0.962867	-0.0189835		-0.523424
O43172	PRPF4	25	23	1	1.04192	1.06915	0.967542	0.597783	0.260043	0.102886	0.070132	1	0.982798	1.03021	0.898644	0.629905	0.278314	0.085464	0.0596007	1	1.05386	1.05831	0.958398	0.64662	0.260575	0.092984	0.0574826	1	1.02319	1.03047	0.946341	0.672936	0.290784	0.0834218	0.052409	12.6966	-0.156815	0.0214307	0.994748	12.803	-0.146144	0	0.995688	12.934	-0.158099	0	0.995179	13.1174	-0.156778
O43175	PHGDH	66	64	1	1.07022	1.04651	0.862544	0.46305	0.170276	0.0576152	0.037499	1	0.992422	0.957135	0.791399	0.432944	0.156151	0.0574535	0.0337937	1	1.01307	0.986271	0.804718	0.421061	0.157823	0.0652266	0.0378412	1	0.973223	0.97122	0.794119	0.415579	0.153908	0.0656687	0.0312165	11.6262	-0.161738	0	0.994222	11.1741	-0.153239	0	0.996126	11.1953	-0.155017	0	0.998613	11.1183	-0.154964
O43181	NDUFS4	9	3	1	0.926035	0.895476	0.744707	0.553166	0.638634	0.715047	0.385233	1	0.991965	0.91367	0.872942	0.566598	0.635275	0.905988	0.515948	1	0.990417	0.929464	0.787928	0.609659	0.721852	0.646913	0.341127	1	0.944077	0.860332	0.687314	0.46894	0.564571	0.71256	0.423852		-0.0483848	0	0.792404		-0.931495	0.655952	0.634995	20.4149	-0.0455346	0	0.840752		-0.0969798
O43187	IRAK2	1		1	0.913998	1.13598	0.789065	0.426232	0.343231	0.193473	0.123954									1	1.07377	0.98072	0.774244	0.486611	0.32734	0.210781	0.155209									11.5958	-0.121338	0.0814079	0.96657					11.9108	-0.100627	0	0.99419
O43189	PHF1	1	1	1	1.05941	1.10342	1.04838	0.734213	0.819569	1.097	0.582927	1	1.05301	1.17511	0.889679	0.49507	0.339133	0.110544	0.0618869	1	1.02641	1.41486	1.15942	1.06705	1.34703	1.17335	1.06756	1	0.835759	0.729253	0.889104	0.394756	0.241438	0.131839	0		-0.0199328	0	0.348726	12.275	-0.128423	0	0.968619		0.739779	1.20488	0.345163	11.5227	-0.145698
O43196-3	MSH5		3									1	0.914742	0.810854	0.724201	0.323638	0.191613	0.212866	0.215573									1	0.845101	0.841214	0.685598	0.396574	0.314378	0.329644	0.17229					10.2386	-0.106311	0.00211512	0.950212					10.802	-0.0908411
O43237	DYNC1LI2	25	22	1	0.978001	1.12123	0.880751	0.494064	0.299533	0.101309	0.0736923	1	0.969472	0.950824	0.855224	0.489485	0.202711	0.0693726	0.0383713	1	0.984023	0.98969	0.876066	0.505371	0.222037	0.102944	0.0565628	1	0.990323	1.01667	0.867388	0.526833	0.22159	0.0845274	0.0380835	12.1301	-0.132105	0	0.984453	11.7691	-0.150541	0	0.995826	11.9755	-0.14331	0	0.999485	12.0449	-0.147384
O43240	KLK10	3	3	1	1.04643	5.58294	0.96781	0.461732	0.692218	0.566254	0.415497	1	0.772271	0.715462	0.778632	0.481462	0.590866	0.638387	0.596426	1	0.960399	1.02414	0.986853	0.697529	0.58355	0.427129	0.288144	1	0.909917	1.1242	1.05749	0.793035	0.885861	0.949615	0.742416		-0.947011	0.533923	-0.00303223			0.115798	0.766253	15.9985	-0.0699917	0	0.982628		-0.110789
O43242	PSMD3	64	46	1	1.02659	1.01344	0.878222	0.509561	0.158185	0.0563742	0.0412067	1	0.981674	0.971277	0.852089	0.543681	0.176439	0.0447047	0.0228489	1	0.986195	0.989577	0.871273	0.515364	0.155504	0.0609276	0.0420804	1	0.995838	0.974229	0.873523	0.580098	0.191698	0.0543876	0.0317981	11.8858	-0.16676	0	0.997369	12.0074	-0.162578	0	0.992947	11.8882	-0.164717	0	0.997079	12.2992	-0.164745
O43251-8	RBFOX2	14	6	1	1.06453	1.04815	0.923156	0.490269	0.315608	0.24853	0.177379	1	1.02713	0.98202	0.802177	0.461033	0.305295	0.273588	0.278713	1	1.02283	0.960293	0.807471	0.417459	0.259079	0.187793	0.120309	1	1.04639	0.989162	0.804868	0.470556	0.328552	0.255258	0.234401	12.071	-0.150307	0.187527	0.991392	11.437	-0.138408	0.243451	0.998225	11.354	-0.132038	0.0784544	0.997519	11.7075	-0.122409
O43252	PAPSS1	56	42	1	0.966293	0.991515	0.936727	0.788202	0.721837	0.250794	0.0474863	1	1.00072	1.01484	0.95383	0.78611	0.846406	0.48733	0.0471809	1	1.00387	1.03655	0.988771	0.85867	0.784046	0.286922	0.0536384	1	1.00327	1.02752	0.993371	0.84779	0.829857	0.46364	0.0600126	16.0661	-0.155256	0	0.955868	17.5918	-0.174967	0	0.929075	16.5584	-0.18062	0	0.98051	17.4258	-0.16458
O43255	SIAH2		2									1	0.968546	0.987439	0.863736	0.566919	0.444694	0.366637	0.147473									1	0.97947	1.03385	0.940196	0.636624	0.484653	0.359709	0.146904					13.5211	-0.0837992	0	0.980783					14.3005	-0.0872286
O43257	ZNHIT1		1									1	0.868006	0.858591	0.870594	0.27088	0.150936	0.0620463	0.0364632									1	0.847358	0.89621	0.706538	0.305261	0.170868	0.0520438	0.0598967					10.7553	-0.224694	0.052102	0.96721					10.3029	-0.150553
O43264	ZW10	32	22	1	0.990594	0.984047	0.784571	0.358804	0.150751	0.076696	0.0426268	1	0.986439	0.962168	0.778651	0.354762	0.134197	0.0657722	0.0457504	1	0.992307	0.994823	0.778847	0.345269	0.147894	0.0834827	0.0470798	1	0.999648	0.954834	0.77304	0.339197	0.128232	0.0876887	0.0459657	10.8672	-0.158159	0	0.999844	10.7966	-0.161686	0	0.998918	10.7855	-0.161138	0.00842785	0.999929	10.7085	-0.163237
O43278-2	SPINT1	3		1	1.00346	1.08845	0.908106	0.700858	0.942819	1.07371	0.968002									1	1.02652	1.06677	0.954472	0.781278	1.01184	0.987221	0.796734										-0.286778	0.918699	0.200518						-0.293202	0.894269	0.369089
O43278	SPINT1	29	20	1	0.985871	1.03059	0.959643	0.859951	1.10462	1.29553	1.12863	1	0.950749	1.00771	0.939567	0.783968	0.989648	1.15826	1.14565	1	1.01188	1.06114	1.00653	0.940467	1.19438	1.13025	0.969879	1	0.975986	1.04941	0.999406	0.896637	0.983629	1.08255	1.0968		0.441148	1.21208	0.698872		0.0119745	1.00413	0.000280608		0.158131	1.05044	0.0599188		0.0665698
O43286	B4GALT5	4	4	1	0.951219	0.986018	0.8578	0.493532	0.254839	0.106293	0.0672266	1	1.05034	1.09696	0.925076	0.510116	0.277571	0.0798062	0.0416006	1	1.02017	1.01832	0.899698	0.541349	0.303658	0.121662	0.0603657	1	1.03468	0.992912	0.907257	0.494406	0.212491	0.0952709	0.0419233	11.9287	-0.134354	0	0.997044	12.2407	-0.146798	0	0.988437	12.4311	-0.131335	0	0.997435	11.991	-0.153136
O43290	SART1	24	27	1	0.887041	0.861998	0.647049	0.264784	0.155131	0.12729	0.0918159	1	0.920226	0.871363	0.672915	0.223992	0.101686	0.0850542	0.053502	1	0.970434	0.928715	0.702599	0.301104	0.178234	0.131278	0.105147	1	0.958978	0.9056	0.660774	0.2305	0.119261	0.0843894	0.0613873	9.74905	-0.135742	0	0.976591	9.85745	-0.180542	0.0236372	0.982704	10.2527	-0.158014	0.0701021	0.996002	9.83501	-0.177215
O43291	SPINT2	10	8	1	0.981981	0.974627	0.902225	0.754474	0.812743	0.865838	0.689375	1	1.03453	1.00185	1.04708	0.702414	0.856352	1.01692	1.003	1	1.01873	1.05227	1.02534	0.866659	0.91774	0.843365	0.652425	1	0.970047	1.03949	1.00742	0.782067	0.865914	0.936294	0.86013		-0.539317	0.780608	0.798406		-0.0502061	0.90091	0.279925		-0.035973	0	0.857006		-0.116196
O43292	GPAA1	7	8	1	0.995302	1.00121	0.814254	0.402527	0.186871	0.112037	0.0509134	1	1.03197	1.04445	0.816118	0.410241	0.193356	0.13078	0.0821076	1	0.985472	0.946165	0.793103	0.39227	0.199894	0.107013	0.0647013	1	0.97249	1.00851	0.797945	0.401293	0.166742	0.109691	0.0869434	11.2319	-0.14604	0.00223174	0.999702	11.243	-0.149905	0.0436932	0.997182	11.1114	-0.139852	0	0.997973	11.0882	-0.152131
O43293	DAPK3	3	5	1	0.999692	0.971153	0.670773	0.229087	0.0345084	0.030535	0.015506	1	0.980621	0.819725	0.583128	0.168069	0.0554134	0.05125	0.0975419	1	1.06034	0.895989	0.653403	0.215833	0.0559599	0.0380353	0.0301462	1	0.991689	0.89876	0.581269	0.166518	0.0711321	0.0509089	0.0446312	9.87196	-0.204593	0	0.998515	9.03123	-0.16466	0	0.978038	9.7576	-0.193016	0	0.991227	9.31347	-0.187134
O43294	TGFB1I1	1		1	1.11946	1.3955	0.934223	0.636275	0.430012	0.436255	0.318536									1	1.11573	1.16173	0.976158	0.579841	0.370152	0.30292	0.189799									13.7452	-0.11416	0.336909	0.830828					12.9261	-0.133876	0.204171	0.958408
O43295	SRGAP3		2									1	1.02923	1.04969	0.771103	0.290628	0.0979413	0.0584024	0.059543									1	0.973377	0.999292	0.808933	0.240702	0.0879325	0.0697071	0.0646361					10.4725	-0.194225	0.0297969	0.997252					10.3847	-0.235559
O43296	ZNF264	1	1	1	0.858224	0.608744	0.551905	0.221254	0.0919963	0	0.0154038	1	0.959389	0.929087	0.773891	0.342867	0.214969	0.212049	0.109569	1	0.982964	1.06189	0.654006	0.364371	0.136298	0.0533217	0	1	1.02919	1.15044	0.774059	0.399315	0.192919	0.165375	0.118412	7.51831	-0.152254	0	0.917286	10.712	-0.160709	0.124325	0.990344	10.2936	-0.156209	0	0.989611	10.9811	-0.154247
O43298	ZBTB43	1	1	1	1.06143	1.40169	0.989936	0.650879	0.371707	0.333284	0.320839	1	0.972516	1.016	0.846198	0.550231	0.40224	0.321235	0.0638752	1	1.01008	1.02715	0.980256	0.566608	0.371152	0.273599	0.242013	1	1.08052	1.05368	0.934362	0.613299	0.400919	0.29472	0.162899	13.0301	-0.179886	0.320147	0.856443	12.933	-0.0962884	0	0.976017	12.69	-0.150979	0.244495	0.996333	13.5204	-0.101149
O43299	AP5Z1	4	4	1	1.15814	1.08824	0.857596	0.390438	0.17187	0.094144	0.042276	1	0.926799	0.859769	0.749372	0.330602	0.200387	0.146705	0.174263	1	1.01029	1.02909	0.813258	0.320681	0.184658	0.0752793	0.0626319	1	0.858042	0.903532	0.812008	0.376834	0.224853	0.17667	0.133066	11.281	-0.167896	0.0234881	0.978585	10.4952	-0.164769	0.127348	0.974563	10.8128	-0.177487	0.0467572	0.997654	11.0172	-0.156968
O43301	HSPA12A	18	23	1	1.08971	0.999967	0.889206	0.536246	0.32955	0.208785	0.100666	1	0.970479	0.998357	0.850807	0.542985	0.39561	0.248926	0.0794785	1	0.998836	0.986975	0.856023	0.531663	0.334107	0.186217	0.0762921	1	1.00496	1.02134	0.906722	0.558462	0.370397	0.239996	0.125728	12.585	-0.112093	0	0.990899	12.7494	-0.101847	0	0.988684	12.4042	-0.113849	0	0.996929	12.9677	-0.104547
O43303	CCP110	3	2	1	1.24097	1.22347	1.0675	0.563652	0.27069	0.189874	0.141676	1	0.958359	1.0798	0.938813	0.52987	0.328064	0.192988	0.143701	1	1.01501	1.03217	0.835635	0.437627	0.208068	0.150552	0.0866847	1	0.976153	0.980227	0.805862	0.506185	0.308359	0.1575	0.0883921	12.3965	-0.216518	0.169632	0.925042	12.4689	-0.136089	0.11189	0.989857	11.4679	-0.144943	0.0486181	0.998326	11.9682	-0.114505
O43306	ADCY6		1									1	1.16335	1.00658	0.775966	0.393852	0.0859899	0.00713927	0									1	0.926842	0.872991	0.603643	0.289857	0.0871167	0	0					10.86	-0.177884	0	0.978445					9.61894	-0.168428
O43310-2	CTIF	8	7	1	1.08962	1.08919	0.993282	0.776429	0.47015	0.109267	0.0422676	1	1.02472	1.05073	0.950018	0.660209	0.442005	0.156049	0.0730875	1	1.02225	1.03649	0.932457	0.684063	0.452788	0.106121	0.0448984	1	1.00359	0.953979	0.938096	0.704977	0.438688	0.165892	0.0671959	14.2907	-0.149296	0	0.980546	13.6577	-0.121	0	0.989032	13.7106	-0.132005	0	0.983864	13.8706	-0.124267
O43312	MTSS1	3	1	1	0.929777	1.06923	0.638889	0.485652	1.22451	0.71595	1.17885	1	0.766063	0.634608	0.650215	0.638693	1.58961	2.01309	1.37015	1	0.556425	1.06232	1.34953	0.858206	1.54158	1.19849	1.56828	1	0.652018	0.901118	0.964073	0.899735	1.26429	1.3526	1.38418						0.260638	1.5	0.607183		0.0415541	1.5	0.398094		0.315481
O43313	ATMIN	1		1	0.727345	0.660685	0.632619	0.585473	0.609884	0.72099	0.643572									1	0.819997	0.957352	0.947486	0.866472	1.11615	0.988332	0.82613											0.639704	0.910927						-0.0910077	0.948913	-0.195486
O43314	PPIP5K2	19	17	1	1.00279	0.98087	0.785631	0.357349	0.122321	0.0470803	0.0333883	1	0.948727	0.967328	0.779046	0.366013	0.144044	0.0829083	0.0705456	1	0.993422	0.973345	0.770767	0.344241	0.113824	0.0572832	0.0369362	1	1.00639	0.971585	0.805306	0.369616	0.157434	0.099609	0.0721449	10.816	-0.169102	0	0.999262	10.8445	-0.157293	0.0135673	0.996929	10.7009	-0.168462	0	0.999185	10.9622	-0.162003
O43318	MAP3K7	13	13	1	0.97516	0.973409	0.875338	0.523521	0.243789	0.13857	0.0920758	1	0.980909	0.996975	0.943225	0.559292	0.307295	0.110769	0.0580528	1	1.00823	1.02586	0.940078	0.567151	0.264086	0.1323	0.0916346	1	0.914575	1.00386	0.961147	0.620052	0.330875	0.129732	0.0752307	12.131	-0.131722	0.00832599	0.998775	12.6232	-0.137799	0	0.997247	12.5191	-0.1469	0.0405416	0.999277	13.0531	-0.134208
O43324	EEF1E1	22	15	1	0.969061	0.891192	0.691018	0.351973	0.162589	0.0561416	0.0288237	1	0.992441	0.8821	0.712769	0.353466	0.177669	0.0623395	0.0369042	1	0.979071	0.921	0.731246	0.358651	0.16461	0.0650551	0.0369119	1	0.967096	0.940323	0.710987	0.341617	0.181255	0.0653257	0.0400019	10.3497	-0.146965	0	0.990025	10.483	-0.144754	0	0.989759	10.6117	-0.149465	0	0.995045	10.4868	-0.147122
O43325	LYRM1	6	6	1	0.910446	1.88958	0.920428	0.66394	0.839653	0.823768	0.501351	1	1.00827	0.99036	0.882947	0.642879	0.46529	0.407306	0.27344	1	1.01127	1.05313	1.03136	0.862203	0.951253	0.777951	0.503449	1	0.983116	0.991146	0.938477	0.696369	0.434226	0.411365	0.284908		-0.844516	0.707178	0.270224	14.5376	-0.0748812	0.0814811	0.995531		-0.0875479	0	0.909273	14.3689	-0.0969154
O43347	MSI1	6	7	1	0.949085	0.908441	0.785313	0.434434	0.242084	0.144208	0.0670146	1	0.976222	0.995219	0.813259	0.42033	0.266121	0.1651	0.0712328	1	1.00496	1.00722	0.804704	0.458728	0.236685	0.137183	0.0699132	1	1.00418	1.01455	0.834337	0.430506	0.230272	0.161559	0.0795672	11.3293	-0.124675	0	0.99073	11.5066	-0.124704	0.00369129	0.996929	11.5557	-0.128492	0	0.999371	11.4899	-0.139286
O43353	RIPK2	15	13	1	0.988192	1.12323	0.940028	0.773043	0.779555	0.6512	0.272843	1	0.993825	1.05113	0.995754	0.784057	0.842418	0.782816	0.274497	1	0.984625	1.02757	0.930362	0.786932	0.83992	0.71067	0.370841	1	1.03287	1.06193	0.978297	0.847706	0.871785	0.803688	0.567956	18.6443	-0.0655642	0	0.871758	19.5375	-0.163213	0	0.843891	20.2181	-0.0576731	0	0.860385		-0.037691
O43374	RASA4	2	1	1	1.09555	1.24264	1.10641	0.539851	0.299878	0.304942	0.1931	1	0.995284	0.915379	0.711503	0.298475	0.148158	0.0344562	0.077552	1	1.0059	1.08708	0.795482	0.515934	0.315727	0.229889	0.148727	1	1.04901	0.998316	0.821442	0.326372	0.118551	0.121008	0.0731284	12.1504	-0.33027	0.262713	0.93304	10.2992	-0.15782	0	0.993913	12.1299	-0.107248	0.0446384	0.989511	10.7592	-0.194344
O43379-4	WDR62	10	6	1	0.984478	1.01789	0.851595	0.423928	0.143017	0.0499439	0.0309902	1	1.00816	1.00834	0.864993	0.459874	0.182305	0.119454	0.0555998	1	0.948499	0.966598	0.828705	0.41511	0.165084	0.0613262	0.0303855	1	0.988773	0.9608	0.782428	0.452116	0.190591	0.101305	0.0732947	11.371	-0.169467	0	0.998898	11.6492	-0.15069	0.0116066	0.999354	11.2725	-0.159197	0	0.996565	11.2955	-0.135725
O43390-2	HNRNPR	66		1	1.01917	1.01341	0.866843	0.563899	0.254437	0.0840859	0.0596264									1	0.993503	1.00893	0.869581	0.5755	0.24858	0.0958473	0.0616241									12.3036	-0.140293	0	0.996421					12.368	-0.13995	0	0.997063
O43390	HNRNPR	1	52	1	0.901533	0.92231	0.833871	0.470631	0.165409	0.130547	0.0800577	1	0.988617	0.937784	0.83214	0.573104	0.298582	0.0484958	0.0249943	1	1.01349	1.05328	0.85265	0.617202	0.175303	0.107863	0.0586048	1	0.997055	0.968745	0.850552	0.600836	0.304637	0.0667448	0.0345262	11.5499	-0.141967	0.0101279	0.983575	12.3086	-0.138283	0	0.982614	12.4192	-0.152605	0	0.98777	12.5655	-0.138554
O43395	PRPF3	25	19	1	0.979367	0.919605	0.69973	0.249954	0.102375	0.078325	0.0573311	1	0.985985	0.94691	0.715911	0.250366	0.108694	0.0819878	0.0548624	1	1.00236	0.918151	0.675077	0.237373	0.106279	0.0757394	0.0597044	1	1.01034	0.960927	0.725489	0.242026	0.109369	0.0934724	0.0727386	10.0533	-0.186098	0.0313921	0.995477	10.121	-0.193011	0.0401433	0.998076	9.91618	-0.184014	0.0302957	0.996003	10.0978	-0.208747
O43396	TXNL1	45	43	1	1.02544	1.07568	0.95649	0.820175	0.87627	0.619964	0.175529	1	1.01735	1.038	0.932969	0.8122	0.897127	0.754919	0.159668	1	1.03539	1.01524	0.941707	0.784262	0.856319	0.515901	0.148439	1	1.03909	1.02621	0.904651	0.815131	0.818114	0.659539	0.214374	18.5113	-0.153148	0	0.925868	19.0935	-0.234361	0	0.912301	17.838	-0.138158	0	0.924257	18.5881	-0.110463
O43399-3	TPD52L2		1									1	0.947283	1.09257	0.83689	0.610458	0.683033	0.813549	0.669509									1	1.12914	0.967683	1.03502	0.68627	0.820636	0.753097	0.667479						-0.805711	0.694137	0.839287						-0.209354
O43399-7	TPD52L2	27	31	1	0.952853	1.00901	0.903417	0.80823	0.933596	1.05378	0.827845	1	0.961939	0.972806	0.946501	0.802408	1.0881	1.28232	1.16386	1	1.01396	1.03974	0.969589	0.884332	1.02747	0.925497	0.701371	1	0.997824	1.04603	0.992532	0.924474	1.0798	1.19363	1.03641						0	1.22309	0.664794		-0.38589	0.70137	0.807796		0.244613
O43402	EMC8	12	11	1	0.915424	0.857614	0.733327	0.371535	0.18555	0.127126	0.105531	1	0.977057	0.947464	0.78974	0.415641	0.17733	0.0772303	0.0465878	1	1.01219	0.999482	0.815122	0.432117	0.269655	0.161394	0.146184	1	1.01097	0.909006	0.794673	0.419154	0.174648	0.0937563	0.0510984	10.6479	-0.126935	0	0.977882	11.1336	-0.146886	0	0.996995	11.443	-0.13466	0.0912983	0.999178	11.1616	-0.144134
O43414	ERI3	13	14	1	1.01518	0.978595	0.90618	0.670896	0.474702	0.2017	0.0552698	1	0.971345	1.00169	0.933454	0.677334	0.527364	0.315065	0.0742687	1	1.02574	1.05521	0.958766	0.729512	0.519367	0.251303	0.0714904	1	1.00122	0.968435	0.996344	0.74656	0.561405	0.317487	0.107267	13.8294	-0.112646	0	0.984153	14.4285	-0.0980535	0	0.975399	14.5436	-0.112035	0	0.985135	15.0905	-0.102482
O43422	PRKRIR	6	8	1	1.03302	1.0365	0.923071	0.383172	0.167097	0.0979533	0.0729849	1	1.05037	1.22085	1.00764	0.468532	0.192552	0.159422	0.090292	1	1.04301	1.04671	0.947846	0.430093	0.179307	0.0990162	0.0625034	1	1.07511	0.986497	0.881887	0.430856	0.160963	0.113918	0.0743819	11.3692	-0.205736	0.0739224	0.997857	11.8908	-0.244541	0.125748	0.96435	11.6634	-0.198681	0.0649597	0.996483	11.4866	-0.171912
O43426	SYNJ1	7	11	1	0.995972	0.98507	0.922727	0.676612	0.287292	0.141098	0.0974895	1	1.00543	1.05063	0.955577	0.650994	0.30906	0.166343	0.0731011	1	0.982991	1.02093	0.949098	0.698288	0.32557	0.155084	0.0970914	1	1.00405	1.05301	0.964642	0.758082	0.362759	0.166989	0.0859534	13.1342	-0.143078	0.0259149	0.997864	13.1741	-0.133401	0	0.997462	13.4129	-0.138421	0.0217353	0.998958	13.8557	-0.139842
O43427	FIBP	11	6	1	0.985972	0.980863	0.783772	0.368625	0.137602	0.0778877	0.0425003	1	1.02778	1.01848	0.788343	0.31066	0.0572974	0.0143451	0.0182737	1	1.00484	0.967974	0.788473	0.366484	0.135725	0.0771358	0.0466864	1	0.998784	0.999263	0.801848	0.283978	0.0666399	0.0234006	0.0159735	10.8818	-0.158939	0	0.999463	10.5954	-0.199313	0	0.997668	10.8883	-0.159648	0	0.99924	10.5695	-0.206032
O43432-3	EIF4G3	29	24	1	0.939124	0.962448	0.813756	0.408921	0.175228	0.0996122	0.0656337	1	0.992422	0.990539	0.816661	0.439144	0.186117	0.105894	0.0622085	1	0.993788	0.996715	0.839277	0.449118	0.18639	0.104101	0.0722198	1	1.03873	1.0047	0.838553	0.445643	0.197167	0.110979	0.0820321	11.2196	-0.147239	0.00421119	0.995935	11.3908	-0.142471	0	0.99965	11.5155	-0.145664	0.00677302	0.999705	11.5058	-0.145182
O43439-4	CBFA2T2	2		1	0.752471	0.678757	0.701007	0.511138	0.511594	0.309606	0.274565									1	0.934621	1.11731	1.02499	0.945901	0.889641	0.716281	0.582965									10.6987	-0.0977661	0	0.80334						-0.0520054	0.1769	0.906616
O43447	PPIH	34	25	1	0.966708	0.975111	0.884982	0.733136	0.779858	0.830224	0.624416	1	1.00199	1.00857	0.90972	0.760163	0.870883	0.997503	0.906677	1	1.00519	1.08416	1.0308	0.843597	0.891954	0.802996	0.614576	1	1.02006	1.06462	0.993511	0.875055	0.926537	0.967312	0.853717		-0.0320886	0.603613	0.802773		-0.231663	0.883807	0.464064		-0.034911	0	0.855142		-0.240073
O43451	MGAM		1									1	0.948951	0.798889	0.753852	0.431475	0.297026	0.210662	0.0670539									1	1.02152	0.901649	0.74517	0.416563	0.351363	0.196204	0.0502855					11.109	-0.105774	0	0.957265					11.2973	-0.108052
O43462	MBTPS2	2		1	0.896195	0.948481	0.776161	0.37483	0.136355	0.0569439	0.0408198									1	0.976809	0.982587	0.831043	0.377845	0.18953	0.104306	0.0344621									10.8522	-0.159647	0	0.988724					11.1825	-0.154001	0.00631397	0.998334
O43464	HTRA2	10	4	1	0.991273	1.03635	0.932459	0.678637	0.677145	0.791043	0.663015	1	0.988977	0.951568	0.857286	0.648205	0.744517	0.888253	0.851599	1	0.965583	1.03226	0.954764	0.75057	0.738879	0.687418	0.539127	1	0.889438	1.02714	0.921111	0.706743	0.665587	0.738444	0.697844		-0.785355	0.70246	0.933857		-0.0715721	0.79116	0.623252		-0.0368722	0.189108	0.941736		-0.165443
O43474	KLF4		1									1	1.17888	1.17898	1.00881	0.533087	0.571845	0.612043	0.405509									1	1.07089	0.858298	0.804349	0.455245	0.45113	0.425215	0.475169						-0.780082	0.529799	0.871224					10.447	-0.304954
O43482	OIP5	4	2	1	1.0268	1.14635	1.03574	0.726533	0.673793	0.618433	0.356214	1	0.983964	1.0576	0.913546	0.754848	0.690924	0.631943	0.450993	1	1.03896	1.10235	1.01617	0.769929	0.733627	0.474787	0.312111	1	1.00449	1.05395	0.937848	0.74609	0.696543	0.544283	0.468472	18.61	-0.054905	0	0.897459	20.8924	-0.0433458	0	0.960355	17.5263	-0.0694875	0	0.951894	19.8825	-0.048348
O43488	AKR7A2	20	22	1	1.12814	1.17776	1.05778	0.793332	0.415631	0.12117	0.0662014	1	1.02708	1.08953	0.986853	0.694584	0.456652	0.137704	0.0359587	1	1.02886	1.02855	0.955234	0.709281	0.386967	0.128557	0.0552606	1	1.03657	1.06673	0.988228	0.744894	0.458443	0.157316	0.035483	14.1808	-0.153908	0	0.96253	13.8831	-0.132819	0	0.982163	13.6569	-0.138592	0	0.995769	14.1632	-0.13673
O43490	PROM1	16	11	1	1.03695	1.07607	0.979824	0.850213	0.988182	1.1701	0.866541	1	0.96648	1.07281	0.983097	0.756246	1.02768	1.22761	1.0719	1	1.00324	1.04082	0.976999	0.840948	1.02032	0.915255	0.723538	1	1.00019	1.08846	0.99335	0.817974	0.893094	0.958179	0.940085		-0.0698041	0.96876	0.0544862		0.0895283	1.02322	0.0149938						-0.260403
O43491-4	EPB41L2	1	1	1	0.80891	1.1804	0.990142	0.706642	0.599673	0.3647	0.117681	1	1.06732	1.28646	0.937685	0.660129	0.474736	0.261472	0.0950352	1	0.92853	1.03311	1.0213	0.572598	0.469669	0.28303	0.0882684	1	0.953458	1.00098	0.9983	0.623024	0.441921	0.240576	0.0548897	15.2742	-0.0924924	0	0.893771	14.0181	-0.103738	0	0.921887	13.7505	-0.102875	0	0.963015	13.692	-0.113163
O43491	EPB41L2	46	52	1	1.0066	1.00129	0.933123	0.739456	0.564832	0.264156	0.0902516	1	0.97545	0.991177	0.903496	0.736644	0.592991	0.303269	0.047483	1	1.01697	1.04525	0.944315	0.763173	0.565607	0.250459	0.0895842	1	1.02058	1.01589	0.958206	0.800685	0.597745	0.302365	0.0896682	14.8346	-0.106859	0	0.982571	14.9916	-0.106136	0	0.961818	14.937	-0.112589	0	0.984245	15.4243	-0.112832
O43493	TGOLN2	8	6	1	1.00059	1.09894	0.995692	0.793936	0.943303	1.10699	0.894855	1	1.02757	1.06803	0.985022	0.834337	1.12545	1.28204	1.17483	1	1.01588	1.0583	1.01344	0.890277	0.999923	0.932621	0.807176	1	1.04935	1.0853	1.00735	0.893957	0.822626	1.07266	1.09308		-0.169514	0.93477	0.182501		0.662522	1.22843	0.696831			0	0.668181		-0.0186801
O43502	RAD51C	3	10	1	1.03349	0.97217	0.893267	0.547242	0.276053	0.128027	0.0492638	1	0.994984	0.998031	0.849087	0.467171	0.174814	0.0555437	0.0182486	1	0.928578	0.998593	0.882754	0.520954	0.240664	0.126134	0.0431018	1	1.04963	1.02983	0.896572	0.501308	0.19046	0.056892	0.0226064	12.3708	-0.134511	0	0.997436	11.5988	-0.160167	0	0.997957	12.1257	-0.139345	0	0.994878	11.945	-0.165485
O43504	LAMTOR5	5	4	1	1.42369	1.48679	1.4513	1.36116	1.83358	1.98083	1.66832	1	1.26269	1.35472	1.30982	0.980725	1.13083	1.51781	1.43972	1	0.95558	0.981434	1.01381	1.09016	0.91795	0.985305	0.77437	1	1.02262	1.12607	0.877661	0.838932	1.00661	1.0931	1.24579			1.5	0.389542		1.23485	1.47877	-0.0832422			0	0.704472		0.0647155
O43505	B3GNT1	2		1	0.990012	1.00623	0.845531	0.580383	0.562788	0.605296	0.425062									1	0.917671	1.09092	0.951313	0.733184	0.62032	0.540065	0.315804										-0.104369	0.507057	0.957088					17.2576	-0.0601011	0	0.945719
O43513	MED7	5	4	1	0.95538	0.96222	0.91165	0.652187	0.484862	0.362858	0.182219	1	0.906591	1.00947	0.91335	0.674164	0.573747	0.464482	0.226069	1	1.01254	0.980874	0.984562	0.711031	0.525073	0.30383	0.168949	1	0.99006	0.982854	0.974031	0.685523	0.552975	0.417942	0.236301	14.3919	-0.0822032	0	0.987238	15.6129	-0.0691731	0	0.957341	14.802	-0.093927	0	0.993257	15.4669	-0.0748864
O43520	ATP8B1	3	3	1	0.995392	0.978756	0.931889	0.668538	0.53363	0.588218	0.476742	1	1.23465	0.97937	0.811984	0.385587	0.216432	0.126906	0.0879035	1	0.991804	0.973378	0.840965	0.587023	0.567582	0.477967	0.307955	1	0.855755	0.886839	0.78057	0.386432	0.187054	0.0993651	0.0668589		-0.0993515	0.509392	0.982222	11.138	-0.148933	0.0512391	0.960935	15.5108	-0.0599391	0	0.974574	10.9806	-0.140021
O43524	FOXO3	7	4	1	0.998798	1.38477	0.999956	0.690591	0.564681	0.501296	0.389167	1	1.02192	1.02206	0.974322	0.738427	0.607144	0.564534	0.494159	1	1.0062	1.1342	1.03227	0.747082	0.599387	0.435655	0.348587	1	1.00205	1.07266	0.986931	0.735293	0.610595	0.562011	0.451815	16.0829	-0.0920745	0.405717	0.801209		-0.0783221	0.492765	0.992287	16.2845	-0.0799181	0.244246	0.959018	19.6854	-0.0730187
O43542	XRCC3	10	6	1	1.09423	1.08891	0.916596	0.510339	0.248673	0.232723	0.171412	1	0.95049	0.908971	0.792837	0.382167	0.134268	0.0565755	0.0508868	1	1.04677	1.06083	0.860466	0.43251	0.247093	0.158703	0.124212	1	0.98829	0.986288	0.819433	0.394253	0.150498	0.0745867	0.0632908	12.0293	-0.161036	0.167159	0.984345	10.9404	-0.159873	0	0.991223	11.5287	-0.151832	0.100273	0.994501	11.1334	-0.159436
O43543	XRCC2	1		1	1.09512	1.19177	0.989558	0.50148	0.248935	0.148521	0.0581621									1	1.07873	1.02659	0.932215	0.439301	0.268549	0.0790725	0.10075									12.1855	-0.172785	0.0744165	0.965736					11.8004	-0.164777	0.067563	0.989041
O43548	TGM5	2		1	0.775146	2.1767	0.656258	0.269686	0.281243	0.122646	0.124146									1	0.992503	1.06116	0.916698	0.594031	0.462716	0.59331	0.138224									9.67749	-0.270415	0.181018	0.558994					14.8635	-0.0710166	0	0.882995
O43567	RNF13	3	2	1	0.902381	0.79946	0.64001	0.439163	0.44098	0.491667	0.442556	1	0.899803	0.861172	0.610274	0.495428	0.559811	0.722442	0.617933	1	0.890385	0.796463	0.635419	0.39677	0.457119	0.388087	0.312265	1	0.956251	0.83849	0.704852	0.503008	0.493781	0.615324	0.531342	12.553	-0.0904902	0.347999	0.950429		-0.284979	0.600799	0.834253	11.3137	-0.079272	0	0.956757		-0.0901097
O43570	CA12	1		1	1.07182	1.10482	0.848568	0.704058	0.756281	0.56541	0.298072									1	1.13717	1.06713	1.06613	0.656202	0.636983	0.444427	0.344386									18.1133	-0.0535548	0	0.87909					16.2407	-0.0760628	0.252743	0.918578
O43572	AKAP10	7	6	1	0.98707	1.01787	0.83184	0.410646	0.126139	0.0280898	0.0295044	1	1.12505	0.895122	0.74117	0.325909	0.0871137	0.0372461	0.038866	1	0.984851	0.975512	0.801037	0.400156	0.131346	0.054689	0.0432075	1	0.984544	0.96759	0.853558	0.311421	0.110622	0.0375823	0.0230474	11.2147	-0.173657	0	0.997818	10.4563	-0.172762	0	0.981441	11.0545	-0.162044	0	0.998224	10.8809	-0.201264
O43581-2	SYT7	1	3	1	0.968973	0.915292	0.742411	0.372315	0.213811	0.134496	0.0736147	1	1.01471	1.04464	0.911383	0.421306	0.229293	0.157624	0.118879	1	0.988419	1.05945	0.812261	0.407473	0.233305	0.119877	0.0437765	1	0.980355	1.04371	0.829136	0.404752	0.185105	0.154307	0.0808988	10.8143	-0.129215	0	0.994695	11.5391	-0.17915	0.121266	0.997356	11.3512	-0.138521	0	0.994924	11.2291	-0.157082
O43583	DENR	21	16	1	0.963839	0.9991	0.921285	0.763851	0.984503	1.20089	0.976837	1	1.01456	1.05545	0.943989	0.763258	1.0118	1.23613	1.1986	1	1.00571	1.06102	0.955908	0.859959	1.05085	1.03183	0.86185	1	1.04828	1.02196	0.976856	0.827323	1.01144	1.07852	0.983277		-0.0825883	0.969473	0.00162409		0.121426	1.03487	0.00823443		-0.105286	0.951121	0.175437		-0.0463569
O43592	XPOT	27	27	1	1.02883	1.02162	0.836306	0.424371	0.191207	0.0991706	0.0632245	1	1.01421	0.950987	0.770393	0.393227	0.1308	0.0505073	0.024605	1	0.975766	0.985899	0.806546	0.39421	0.180365	0.0945176	0.0601727	1	0.993135	0.97205	0.775153	0.382489	0.134447	0.0566945	0.0325432	11.4025	-0.148839	0.0089254	0.998867	10.8841	-0.160095	0	0.996163	11.1434	-0.148291	0.00312935	0.999471	10.8788	-0.160272
O43598	DNPH1	9	10	1	1.01678	1.00213	1.0386	0.850546	0.867313	0.659381	0.211562	1	1.03669	1.12356	1.02611	0.808501	0.871701	0.782974	0.327726	1	1.00566	0.988529	0.96501	0.81581	0.817712	0.511267	0.183202	1	1.05105	1.14917	1.04064	0.83958	0.925775	0.712333	0.340124	18.777	-0.143324	0	0.943088	19.7737	-0.139445	0	0.851863	17.7154	-0.113041	0	0.949109	19.6018	-0.1215
O43615	TIMM44	31	24	1	1.00033	0.99076	0.859148	0.442187	0.14155	0.0507612	0.0326131	1	0.991432	1.00308	0.863452	0.457612	0.118659	0.0336798	0.0249983	1	1.00701	1.00654	0.893867	0.469901	0.144551	0.0657386	0.041277	1	1.01331	1.01002	0.886471	0.464352	0.131417	0.0435725	0.0262269	11.4751	-0.169472	0	0.999008	11.5409	-0.17924	0	0.997509	11.7244	-0.172069	0	0.999431	11.6632	-0.180213
O43617	TRAPPC3	15	14	1	0.981898	1.00406	0.940476	0.753683	0.792125	0.601276	0.228585	1	0.9909	1.02496	0.936023	0.769544	0.881975	0.719103	0.254572	1	1.0209	1.04565	0.990914	0.835071	0.836092	0.526174	0.203025	1	1.01285	1.04259	0.98792	0.790926	0.826984	0.700861	0.298255	18.0542	-0.074109	0	0.888795	19.2188	-0.148799	0	0.855903	17.9402	-0.115772	0	0.957537	19.2162	-0.0814709
O43633	CHMP2A	19	19	1	1.03859	1.04001	0.97901	0.915076	1.06518	1.147	0.642707	1	1.04991	1.05634	0.957597	0.871588	1.123	1.26441	0.719153	1	1.01332	1.01839	0.966661	0.887469	1.08116	0.935927	0.492755	1	1.01802	1.05653	0.999951	0.905603	1.02759	1.13808	0.742214		0	5.81884e-06	0.772025		-0.0451838	0.987149	0.00322595	19.2281	-0.653664	0.492752	0.911775		0
O43639	NCK2	11	9	1	0.934801	1.03581	0.955072	0.761979	0.836294	0.515169	0.0803645	1	1.02314	1.09966	1.03775	0.814762	0.97907	0.744323	0.116646	1	0.974856	1.01965	0.978359	0.881425	0.899309	0.510736	0.0917603	1	1.04811	1.0812	1.06378	0.899756	0.987136	0.719505	0.145749	17.6719	-0.154116	0	0.901299	18.9346	-0.272991	0	0.935178	17.9351	-0.191127	0	0.976233	18.9402	-0.240365
O43657	TSPAN6	10	7	1	0.991331	0.978133	0.984754	0.777319	1.08369	1.40957	1.15495	1	1.05672	1.17804	1.06538	0.885781	1.45854	1.85325	1.84986	1	1.03157	1.18101	1.14035	1.00063	1.32362	1.27242	1.24556	1	0.987538	1.00177	1.12773	0.93716	1.26885	1.4049	1.61053		0.616511	1.28226	0.641782		1.21391	1.5	0.707567		0.0310556	1.5	0.498777		0.137247
O43660	PLRG1	14	10	1	0.949761	0.918493	0.75829	0.421807	0.260451	0.161397	0.103071	1	0.988423	0.921747	0.747845	0.434603	0.2521	0.156183	0.100767	1	0.944682	0.979642	0.817547	0.462114	0.287139	0.173323	0.104043	1	0.981543	0.90023	0.790801	0.417086	0.22169	0.155469	0.11013	11.2067	-0.116037	0	0.993374	11.1861	-0.116412	0	0.996516	11.7865	-0.1157	0	0.996074	11.2314	-0.127036
O43663	PRC1	19	12	1	0.94522	0.913903	0.709623	0.274847	0.127786	0.121598	0.0857693	1	1.02489	0.966314	0.750141	0.291038	0.121571	0.0986622	0.0908209	1	0.956056	0.877954	0.681944	0.284981	0.143392	0.111705	0.0798511	1	0.973399	0.953751	0.746584	0.313552	0.127824	0.106147	0.087573	10.1487	-0.18022	0.0663777	0.991643	10.3604	-0.18933	0.0654757	0.998601	10.0642	-0.142823	0	0.988921	10.4467	-0.174758
O43665-3	RGS10	12	15	1	1.02087	1.04828	1.00806	0.862941	1.02901	1.07717	0.695667	1	1.03532	1.11142	0.969068	0.871329	1.05276	1.16542	0.793742	1	0.996618	1.03703	0.973569	0.825835	0.978632	0.787958	0.47171	1	1.05774	1.09898	1.03035	0.878333	0.928288	0.965051	0.748171		0	0	0.747911		-0.097413	0.970463	0.0419981	20.7397	-0.108785	0	0.871677
O43670-2	ZNF207	1	3	1	0.984009	1.19915	1.0023	0.750002	0.751483	1.12523	0.728832	1	0.828819	0.891204	0.851732	0.645237	0.818894	1.13377	0.935113	1	1.09307	1.05557	0.897894	0.749026	0.963692	0.757391	0.586286	1	1.01588	0.943992	0.836789	0.835363	0.916226	1.07236	0.976564		-0.243846	0.838888	0.341283		-0.298667	0.87695	-0.0879287		-0.0263432	0	0.69103		-0.200136
O43670-4	ZNF207	12	14	1	1.05458	1.03342	1.03875	0.81547	0.933367	1.19234	0.911716	1	0.979555	1.04655	0.954009	0.767407	0.952328	1.25692	1.07963	1	1.0027	0.976776	0.941086	0.793464	0.896579	0.81756	0.64028	1	1.09025	0.957947	0.962899	0.862135	0.913919	0.996659	0.967879		-0.0111003	0.96862	0.0432492		0.0683782	1.16759	0.392747		-0.0221827	0	0.795589		-0.0306333
O43674	NDUFB5	7	7	1	1.04142	0.949425	0.866915	0.516168	0.190232	0.0305876	0.0107595	1	0.968137	0.939423	0.850627	0.5239	0.219268	0.0374349	0.0132199	1	1.01467	1.02232	0.849982	0.485807	0.186827	0.0413582	0.0249725	1	0.962421	0.957228	0.832295	0.537053	0.235044	0.0537353	0.0144749	11.9264	-0.165532	0	0.992457	11.95	-0.154896	0	0.989833	11.7082	-0.159194	0	0.996307	11.9816	-0.146622
O43676	NDUFB3	6	4	1	1.02095	1.00232	0.8859	0.670906	0.48048	0.249526	0.0993289	1	0.974047	0.965184	0.884274	0.73547	0.58653	0.324686	0.112317	1	0.994079	1.03559	0.956364	0.701871	0.476458	0.267052	0.0990742	1	1.03358	1.04445	0.916663	0.804521	0.510669	0.313256	0.120839	13.9385	-0.10044	0	0.987601	15.0406	-0.0937409	0	0.968077	14.2743	-0.105778	0	0.992384	15.0281	-0.104828
O43677	NDUFC1	2	1	1	1.11686	0.932	1.19255	0.902001	1.34236	1.55153	1.57653	1	0.943723	0.762348	1.34258	0.919563	1.84934	1.75672	2.42237	1	1.07162	1.13677	1.13231	1.35638	1.09013	1.56488	1.40841	1	0.853054	1.1296	0.589257	0.911691	1.39649	1.38747	2.08423		1.19563	1.5	0.851025		0.114077	1.5	0.407607		0.0455575	1.5	0.565054		0.320935
O43678	NDUFA2	8	7	1	1.03333	0.972612	0.849237	0.668208	0.758131	0.788363	0.43425	1	1.10985	0.946842	0.821252	0.608343	0.734925	0.803831	0.508369	1	0.997015	1.07094	0.846379	0.643537	0.794655	0.656756	0.401184	1	1.00201	0.999758	0.84155	0.609941	0.707432	0.720852	0.499604		-0.0348052	0	0.770645		-0.0576108	0.619767	0.759686		-0.0411325	0	0.824785		-0.926807
O43681	ASNA1	24	22	1	1.01713	1.00028	0.912249	0.643101	0.429842	0.179252	0.0503673	1	1.00278	0.999125	0.892465	0.668483	0.485406	0.246194	0.0262704	1	1.00563	1.02222	0.931214	0.670281	0.431716	0.189827	0.0511874	1	1.00189	1.0133	0.942579	0.71278	0.483069	0.258809	0.052931	13.4699	-0.117321	0	0.989525	13.8937	-0.109058	0	0.975792	13.6813	-0.119475	0	0.991586	14.2697	-0.112122
O43683	BUB1	21	11	1	0.836222	0.850447	0.633906	0.288026	0.093803	0.0318709	0.0245709	1	0.980579	0.878945	0.815544	0.338008	0.129055	0.0743379	0.0557872	1	0.958916	1.00439	0.826506	0.406969	0.140639	0.053252	0.034126	1	0.861503	0.944143	0.849867	0.369765	0.145888	0.0714116	0.0647719	9.75099	-0.161621	0	0.960544	10.8385	-0.176099	0.0229033	0.988559	11.2008	-0.165617	0	0.997974	11.1039	-0.177628
O43684	BUB3	22	19	1	1.0057	1.0111	0.940458	0.755132	0.746561	0.520186	0.185749	1	0.974806	1.0451	0.915765	0.721888	0.753311	0.613112	0.191692	1	0.998969	1.0145	0.947635	0.781519	0.738468	0.465022	0.162231	1	1.00272	0.992989	0.912779	0.771382	0.703676	0.542139	0.217449	17.1539	-0.0796313	0	0.927299	17.6124	-0.0670845	0	0.862469	16.8808	-0.0920249	0	0.949728	17.1965	-0.07097
O43688-2	PPAP2C	5	4	1	0.997052	1.02486	0.898244	0.695013	0.731173	0.732515	0.462143	1	1.10962	1.07096	0.993794	0.75105	1.06455	1.17108	0.865895	1	0.971666	1.03299	0.910324	0.696909	0.748811	0.586639	0.379151	1	0.97499	1.0044	0.881202	0.734719	0.821979	0.819774	0.700146		-0.0366534	0	0.870722		-0.0918156	0.963144	0.0412679	19.328	-0.048055	0	0.921986		-0.596356
O43707	ACTN4	127	100	1	0.964495	1.1355	0.940465	0.831602	1.0576	1.23684	0.693843	1	0.986556	1.02541	0.937349	0.820794	1.09214	1.32166	0.652629	1	1.01274	1.04283	0.998777	0.917627	1.15297	1.08495	0.532419	1	0.998333	1.02046	0.973071	0.884318	1.06199	1.20456	0.718943		-0.15585	0.95207	0.0447443		-0.111495	0.964915	0.0105758		0	0	0.842233		-0.0698707
O43709	WBSCR22	8	14	1	1.01738	0.955416	0.804615	0.427435	0.239867	0.108956	0.0408923	1	1.0013	0.960453	0.831038	0.434396	0.2547	0.142453	0.0420564	1	0.886579	0.977982	0.890934	0.462051	0.265853	0.139324	0.0462686	1	0.982442	1.00223	0.829845	0.458823	0.290365	0.141199	0.0651601	11.3735	-0.135239	0	0.996832	11.572	-0.131384	0	0.996512	11.938	-0.135283	0	0.985044	11.7786	-0.124225
O43715	TRIAP1	5	4	1	0.99803	1.09573	1.08947	0.857446	1.28992	1.57952	1.34865	1	1.12851	1.25098	1.14362	0.989147	1.36564	1.61518	1.67034	1	1.02771	1.18487	1.18242	1.04504	1.34948	1.32178	1.2288	1	1.10323	1.16742	1.12226	0.983868	1.15708	1.39841	1.54141		1.0859	1.46408	0.831592		1.13889	1.5	0.700999		0.0366357	1.5	0.584228		0.115043
O43716	GATC	6	7	1	0.942822	0.979501	0.951175	0.695995	0.749343	0.783646	0.541392	1	0.984909	1.06338	1.00498	0.7294	0.803626	0.900711	0.66468	1	1.03571	1.1098	1.09117	0.902186	0.864212	0.713612	0.548348	1	1.05568	1.06011	1.02453	0.844507	0.843406	0.81947	0.590094		-0.0306803	0	0.795803		-0.228922	0.774572	0.762861		-0.0513991	0	0.903681		-0.033627
O43719	HTATSF1	70	51	1	0.906028	0.919846	0.854516	0.71315	0.7781	0.646247	0.234293	1	0.969146	1.00705	0.97651	0.799365	0.960404	0.920274	0.245603	1	0.999957	1.06353	1.01609	0.931167	0.921506	0.688186	0.242096	1	1.01582	1.03756	1.01013	0.902038	1.03146	0.926327	0.306582	18.3661	-0.0541011	0	0.755209	19.9518	-0.28369	0	0.90613	19.0853	-0.159033	0	0.979156
O43731-2	KDELR3	1	1	1	1.34329	1.31429	0.975491	0.590218	0.26827	0.138534	0.0818813	1	1.1902	1.15119	0.803667	0.469635	0.171363	0.0151402	0.00190933	1	0.946199	0.923032	0.774078	0.310266	0.174184	0.0594816	0.0413784	1	1.07778	1.06294	0.796049	0.329982	0.1094	0.05089	0.0139843	12.6806	-0.156834	0.0531771	0.882483	11.4348	-0.161406	0	0.959417	10.6592	-0.160321	0	0.992235	10.7582	-0.181167
O43734	TRAF3IP2	2		1	1.05983	1.08166	0.911175	0.52226	0.423706	0.322179	0.130771									1	0.867562	1.00006	0.882779	0.505824	0.371809	0.245568	0.119983									13.1594	-0.0961761	0.0372917	0.971058					12.6265	-0.103286	0.00697365	0.972444
O43739	CYTH3	2	2	1	1.08889	1.1499	1.00487	0.545962	0.25687	0.131878	0.0410122	1	1.04245	0.985741	0.91809	0.69646	0.434123	0.155796	0.02688	1	1.03511	1.01822	0.907298	0.460139	0.235359	0.108288	0.0743284	1	1.02221	0.990427	0.955843	0.692013	0.432594	0.169643	0.0607117	12.4841	-0.163109	0.0360328	0.975738	13.7474	-0.129025	0	0.987073	11.8344	-0.15482	0.0394198	0.997781	13.8064	-0.124808
O43741	PRKAB2	5	1	1	1.29535	1.29005	1.08733	0.696148	0.248398	0.0915165	0.0397695	1	1.08271	1.14454	0.817057	0.575178	0.385974	0.272272	0.237182	1	1.069	1.02211	0.946532	0.522667	0.179166	0.0789256	0.043258	1	1.0786	0.940196	0.966795	0.633436	0.16836	0.166645	0.0950696	13.1169	-0.1922	0.0276866	0.906897	12.8278	-0.0993818	0.134098	0.967204	12.1342	-0.17886	0.0169464	0.996349	12.5102	-0.263024
O43747-2	AP1G1	40	50	1	1.06137	1.08208	0.963201	0.792067	0.683403	0.163005	0.0463246	1	1.02029	1.06397	0.959247	0.796112	0.75821	0.293623	0.0489832	1	1.01761	1.02085	0.936975	0.779449	0.679954	0.170095	0.0531636	1	0.988842	1.02484	0.983741	0.816211	0.700608	0.287345	0.0560057	15.7077	-0.173972	0	0.95922	16.4051	-0.161193	0	0.956654	15.6163	-0.15678	0	0.959562	16.0676	-0.141695
O43752	STX6	12	10	1	1.08711	1.0989	0.970789	0.770472	0.828882	0.848427	0.559717	1	0.972386	1.05846	0.97163	0.792908	0.894663	1.01456	0.700284	1	1.03634	1.06404	0.976909	0.763075	0.788166	0.633837	0.458927	1	0.978284	1.06476	0.94047	0.888914	0.863489	0.93047	0.659605		-0.0285821	0	0.74921		-0.370055	0.850603	0.437398		-0.0447036	0	0.93288		-0.0232151
O43759-2	SYNGR1		3									1	1.00007	0.990163	0.895916	0.738395	0.741205	0.899056	0.765092									1	0.978402	1.01152	0.867443	0.668751	0.653513	0.659516	0.632279						-0.592013	0.785937	0.813042						-0.117321
O43759-3	SYNGR1	1		1	1.05328	1.10699	1.03495	0.761038	0.675173	0.591375	0.511843									1	1.07547	1.10043	1.07811	0.701024	0.721569	0.582351	0.342025										-0.0697896	0.509893	0.940362					18.3593	-0.0580142	0	0.891784
O43760	SYNGR2	7	6	1	1.12808	1.03033	1.04323	0.939484	1.32486	1.60995	1.42545	1	1.18464	1.12681	1.0879	1.06031	1.6754	2.08849	2.17003	1	1.00152	1.23877	1.20646	1.15274	1.47545	1.49469	1.33646	1	0.958065	1.15589	0.980671	1.08717	1.41746	1.84256	1.96687						1.64606	1.5	0.45836		0.0559631	1.5	0.716038		0.190491
O43765	SGTA	25	30	1	1.01947	1.01988	0.969513	0.906326	1.09976	1.32723	1.13755	1	0.981951	1.02764	0.953731	0.843539	1.12653	1.40511	1.42318	1	1.00531	1.00631	0.960402	0.91163	1.12379	1.0586	0.883952	1	1.0053	1.02329	0.983265	0.926711	1.0734	1.27397	1.24295		0.524059	1.23239	0.75806		0.18379	1.41907	0.911556		-0.0383881	0.987673	0.0108117		0.596203
O43766	LIAS	15	7	1	0.965413	1.00366	0.87494	0.562209	0.543888	0.550642	0.386504	1	0.946543	1.04283	0.909774	0.602731	0.721274	0.742341	0.598736	1	0.997897	1.00485	0.917792	0.627309	0.579055	0.507357	0.345994	1	0.960925	1.00293	0.934687	0.685378	0.668511	0.659249	0.55787	15.3225	-0.109298	0.462708	0.96312		-0.855646	0.66627	0.898644	16.3113	-0.0632842	0.185544	0.973768		-0.0880332
O43768-3	ENSA	22		1	0.923378	0.911542	0.89231	0.79209	0.997825	1.21258	1.08155									1	0.975746	1.02621	1.00813	0.945318	1.15142	1.1195	1.01768											0.97304	0.00548683						0.0395936	1.09543	0.537074
O43768-4	ENSA		18									1	0.983468	0.996629	0.963155	0.828141	1.14371	1.42836	1.55716									1	0.99956	1.03417	0.993337	0.926865	1.11328	1.35663	1.341						0.145602	1.5	0.918551						0.807158
O43772	SLC25A20	8	12	1	0.952384	0.904542	0.801144	0.401875	0.186768	0.111719	0.0780948	1	1.02817	1.04425	0.892232	0.464698	0.219527	0.0751184	0.0326644	1	1.03411	1.03397	0.88167	0.48119	0.23317	0.134763	0.105746	1	1.05425	1.04873	0.912143	0.480611	0.198355	0.0769906	0.0405053	11.1464	-0.140007	0.00477229	0.99101	11.8136	-0.154873	0	0.996979	11.8553	-0.146897	0.0579403	0.997977	11.9079	-0.160947
O43776	NARS	44	44	1	1.03846	1.05741	0.906826	0.416428	0.154234	0.0781585	0.0512563	1	0.995198	0.994235	0.886264	0.433668	0.120047	0.0403123	0.0300075	1	1.03222	1.04134	0.88515	0.416418	0.159946	0.0807713	0.0441625	1	0.987421	0.978545	0.882289	0.437709	0.128494	0.0584818	0.0415002	11.5028	-0.185948	0.0333893	0.996659	11.5083	-0.184606	0	0.999356	11.4622	-0.173283	0.0187037	0.997973	11.5201	-0.175948
O43795	MYO1B	53	47	1	0.995003	0.944493	0.737647	0.322419	0.114843	0.0598951	0.0430819	1	0.99078	0.946758	0.734684	0.304204	0.0934249	0.0477244	0.0385614	1	0.989767	0.941767	0.713395	0.310088	0.112531	0.0645495	0.0470119	1	0.965001	0.951456	0.719239	0.296062	0.0965721	0.0525956	0.0393034	10.4798	-0.165116	0	0.998017	10.3867	-0.174809	0	0.99787	10.3299	-0.163161	0	0.997939	10.3009	-0.172843
O43805	SSNA1	7	3	1	0.981414	1.05833	0.981449	0.736613	1.02703	1.22678	0.997438	1	0.980849	1.09408	1.0714	0.841236	1.2039	1.46232	1.42346	1	1.04803	1.14102	1.04618	1.01547	1.25722	1.1391	0.95899	1	1.14958	1.06682	1.24073	1.07718	1.20292	1.11374	1.39195		0.0135331	1.10467	0.128725		1.07661	1.44289	0.877614			1.093	0.125908
O43808	SLC25A17	1	3	1	0.984388	1.08106	0.827475	0.430369	0.197775	0.163219	0.0704842	1	1.00536	0.902676	0.83077	0.377885	0.148209	0.0651173	0.0358171	1	0.990955	0.956759	0.806059	0.409711	0.24033	0.171184	0.0808369	1	0.957711	0.981228	0.777197	0.365682	0.15162	0.0846975	0.0526684	11.4039	-0.146254	0.0456558	0.99244	11.0999	-0.164736	0	0.993146	11.3281	-0.130464	0.0292801	0.997094	10.8674	-0.153832
O43809	NUDT21	25	20	1	0.988659	0.960332	0.845465	0.615086	0.598692	0.476074	0.23686	1	0.956791	0.937631	0.845314	0.559791	0.577965	0.555704	0.295843	1	0.982255	0.94948	0.834621	0.621935	0.58684	0.406395	0.200809	1	0.934061	1.02063	0.86171	0.61301	0.589328	0.501716	0.292477	15.3906	-0.0630216	0	0.953699	16.0079	-0.0565415	0	0.923541	14.7409	-0.069429	0	0.96014	15.938	-0.0596252
O43813	LANCL1	14	17	1	0.968733	1.04111	0.918029	0.713174	0.817732	0.78844	0.461967	1	1.0008	1.05615	1.01143	0.800592	1.00387	1.08241	0.621792	1	1.01635	1.0735	0.982767	0.831793	0.955875	0.750549	0.411367	1	1.04488	1.02875	1.03239	0.85525	0.934559	0.857102	0.615617		-0.0337261	0	0.764715		0	0	0.707662	20.1888	-0.113165	0	0.897097		-0.0625587
O43815	STRN	30	24	1	1.04913	1.10474	0.945099	0.66601	0.354524	0.122	0.0726936	1	1.00648	1.07018	0.920968	0.65573	0.38419	0.116835	0.0447231	1	1.0163	1.03498	0.941215	0.638302	0.342669	0.127349	0.0683778	1	1.0409	1.05407	0.983251	0.671348	0.373983	0.120423	0.0428077	13.3223	-0.135375	0	0.98766	13.3121	-0.133079	0	0.989207	13.1424	-0.133505	0	0.99712	13.4412	-0.140509
O43818	RRP9	15	9	1	0.954627	0.951204	0.839403	0.460202	0.319389	0.243979	0.16084	1	0.960727	0.971688	0.831102	0.486234	0.455043	0.474808	0.326285	1	0.961398	0.984095	0.872778	0.553183	0.377093	0.249628	0.156966	1	1.01892	0.972072	0.828094	0.533988	0.44874	0.404761	0.306504	11.85	-0.120485	0.121849	0.992874	12.1425	-0.138139	0.39641	0.974818	12.9102	-0.0972207	0	0.996577	13.1466	-0.0924536
O43819	SCO2	9	6	1	1.02788	0.935301	0.760648	0.373817	0.145348	0.0424263	0.0383209	1	1.09907	1.08979	0.934044	0.477917	0.292227	0.1934	0.210683	1	0.99602	0.972409	0.839	0.37405	0.14001	0.0636152	0.0331199	1	1.00861	1.05724	0.912462	0.469214	0.292318	0.189046	0.157738	10.7797	-0.157877	0	0.995359	11.9007	-0.172222	0.193014	0.983305	11.1152	-0.170195	0	0.999524	11.8986	-0.154191
O43822-4	C21orf2	2	2	1	1.04625	1.10888	0.958353	0.473337	0.200398	0.197449	0.17535	1	0.935872	0.873003	0.763338	0.670761	0.212136	0.0844442	0.0623255	1	0.983225	1.09326	0.893899	0.500833	0.283314	0.199688	0.178359	1	0.906053	0.977484	0.788394	0.524912	0.244716	0.155572	0.0798949	11.8328	-0.222883	0.172673	0.988296	12.4505	-0.135454	0	0.944506	12.023	-0.145148	0.147823	0.991346	11.8157	-0.119936
O43823	AKAP8	13	10	1	1.25623	1.92001	1.04296	0.540862	0.292974	0.194013	0.0958528	1	1.0306	1.01156	0.805026	0.457576	0.210699	0.0846308	0.0363098	1	1.02941	1.00232	0.789069	0.385599	0.207544	0.115554	0.0647586	1	1.02057	0.942633	0.803199	0.430415	0.182637	0.0955003	0.0563195	12.4476	-0.17861	0.132385	0.66365	11.4531	-0.14203	0	0.997028	11.0907	-0.141664	0.0112939	0.99886	11.271	-0.14306
O43824	GTPBP6	7	8	1	0.966705	0.938734	0.724281	0.331625	0.130197	0.0659253	0.0489957	1	1.02925	0.96645	0.762434	0.313928	0.147359	0.0890096	0.0862546	1	1.0041	0.925357	0.699328	0.324104	0.134613	0.0788139	0.0432427	1	0.976176	0.951562	0.754764	0.314264	0.131221	0.0851975	0.04526	10.4629	-0.157269	0	0.996846	10.536	-0.175012	0.0530377	0.998618	10.3174	-0.152923	0	0.997029	10.5423	-0.166222
O43826-2	SLC37A4	5	4	1	0.999128	0.947114	0.732916	0.384257	0.247557	0.124199	0.0842746	1	0.933132	0.872242	0.753058	0.342223	0.127789	0.0519744	0.0272849	1	0.940486	0.946086	0.819788	0.439433	0.241728	0.151217	0.0836886	1	0.91462	0.930208	0.711336	0.402	0.129665	0.070508	0.0420517	10.8924	-0.124835	0	0.997984	10.5965	-0.162288	0	0.983882	11.5388	-0.126104	0.000704645	0.994267	10.6254	-0.146913
O43829	ZBTB14	2		1	1.01456	0.989111	0.90288	0.666204	0.58233	0.336368	0.149735									1	0.843807	0.937764	0.732659	0.55001	0.545142	0.289077	0.0882241									14.766	-0.0840608	0	0.973726					12.8156	-0.0827525	0	0.897218
O43837	IDH3B	31	28	1	0.99136	1.00883	0.815927	0.47117	0.321263	0.201934	0.0736304	1	1.00256	0.971565	0.811309	0.442883	0.32977	0.240223	0.0659624	1	1.00144	0.996082	0.820476	0.482839	0.347858	0.200638	0.0756267	1	1.02866	0.963314	0.818121	0.467588	0.3226	0.223005	0.10038	11.942	-0.112327	0	0.994813	11.8418	-0.108536	0	0.988828	12.084	-0.109588	0	0.993639	11.9654	-0.107133
O43847-2	NRD1	47	43	1	1.02166	1.07381	0.912661	0.522536	0.194353	0.0517144	0.0288449	1	0.99886	1.03481	0.914758	0.536472	0.247338	0.0942533	0.0539687	1	0.982994	1.01695	0.925699	0.51747	0.191495	0.064754	0.0321563	1	0.998799	1.03615	0.937282	0.555162	0.242818	0.0961887	0.0513963	12.0967	-0.168829	0	0.995093	12.2878	-0.146818	0	0.998606	12.0981	-0.168666	0	0.999398	12.4199	-0.151498
O43852-3	CALU	41	29	1	1.03177	0.990059	0.895132	0.487489	0.19479	0.089815	0.0500513	1	0.964867	0.94562	0.83564	0.435501	0.174014	0.0819197	0.0392279	1	1.01116	0.979849	0.852194	0.460501	0.179723	0.0823867	0.0484852	1	0.963816	0.999094	0.850971	0.458494	0.185266	0.0866547	0.0467061	11.8904	-0.154621	0	0.999163	11.4051	-0.152766	0	0.9965	11.594	-0.152282	0	0.999237	11.594	-0.150961
O43852-4	CALU	4	3	1	0.955237	0.99035	0.806034	0.495721	0.254153	0.136745	0.0620712	1	0.972608	0.914929	0.737596	0.477485	0.18961	0.0713742	0.0208069	1	1.01777	1.03895	0.965101	0.538286	0.271755	0.115426	0.0683192	1	0.967046	0.967661	0.776905	0.476233	0.223715	0.0833397	0.0224633	11.7583	-0.125534	0	0.996309	11.1338	-0.137066	0	0.984538	12.438	-0.150886	0.0280109	0.996621	11.418	-0.136786
O43861	ATP9B	4	2	1	1.0088	1.04709	0.779545	0.294574	0.104518	0.0470541	0.043119	1	1.0627	0.919324	0.802148	0.338504	0.148145	0.0976539	0.0411177	1	0.993148	0.936827	0.738243	0.28682	0.0929296	0.0451725	0.0246389	1	0.889329	0.912607	0.715222	0.283597	0.178074	0.0475707	0	10.546	-0.190013	0.0144667	0.998142	10.8299	-0.166019	0.0184647	0.992267	10.346	-0.180845	0	0.997468	10.2997	-0.161873
O43865	AHCYL1	17	10	1	1.08377	1.08225	1.05179	0.751185	0.341993	0.0570463	0.014621	1	1.02206	1.12743	0.963034	0.70133	0.437991	0.180666	0.071168	1	1.0302	1.02353	0.979817	0.70133	0.323369	0.0749809	0.0239694	1	1.00461	0.992212	0.903782	0.674473	0.39029	0.161001	0.0683635	13.6348	-0.176789	0	0.98555	13.9116	-0.123108	0	0.981616	13.3526	-0.163135	0	0.996659	13.4659	-0.12296
O43896	KIF1C	16	19	1	1.03182	1.03941	0.811854	0.432807	0.251693	0.11611	0.090873	1	1.01506	1.01275	0.814088	0.368977	0.140276	0.0826227	0.0541177	1	1.01164	1.04483	0.816705	0.388717	0.196891	0.133904	0.0657655	1	1.00961	0.992803	0.782363	0.355866	0.139692	0.0730101	0.0467934	11.4873	-0.131603	0.0105025	0.99654	10.9925	-0.167132	0.0171587	0.99954	11.1593	-0.153243	0.0434452	0.997327	10.8342	-0.160592
O43900	PRICKLE3	1	1	1	1.10928	1.27854	0.982031	0.497424	0.306368	0.186055	0.137661	1	1.02785	0.986231	0.905486	0.399582	0.193678	0.100369	0.0520519	1	1.06657	1.02062	0.858534	0.509767	0.441518	0.164601	0.193434	1	0.961353	1.01685	0.726713	0.389571	0.157783	0.0920969	0.0533404	12.1812	-0.169424	0.151378	0.934086	11.4568	-0.178186	0.0490591	0.998019	12.7284	-0.0979839	0.0104765	0.977804	10.7569	-0.144539
O43909	EXTL3	13	7	1	1.07054	1.03029	0.890144	0.493037	0.230808	0.131892	0.067417	1	0.956594	0.957455	0.816364	0.406591	0.200747	0.0882028	0.0223944	1	1.01621	0.981582	0.82389	0.474269	0.211196	0.121906	0.0721356	1	0.941336	0.966932	0.766704	0.404295	0.202567	0.0883219	0.0349632	11.9838	-0.142523	0.0164978	0.99518	11.2509	-0.148702	0	0.996022	11.6314	-0.134339	0	0.999153	11.0347	-0.141543
O43913	ORC5	14	7	1	1.02484	0.8978	0.710766	0.280591	0.114786	0.0954604	0.0664059	1	0.987586	0.915191	0.709217	0.229875	0.0528002	0.0403236	0.0324315	1	0.989805	0.948043	0.693184	0.26868	0.131743	0.0918797	0.073775	1	0.98157	0.938708	0.682313	0.230533	0.0665054	0.0464239	0.0353297	10.1936	-0.169727	0.0284636	0.992456	10.0362	-0.201178	0.00103046	0.994931	10.0935	-0.176118	0.0452522	0.998513	9.93825	-0.193029
O43920	NDUFS5	9	7	1	0.926049	0.899374	0.803317	0.414672	0.193656	0.100972	0.0605575	1	1.02359	1.07823	0.961703	0.611844	0.598634	0.637281	0.7698	1	1.01868	1.00078	0.830159	0.468634	0.228381	0.119916	0.074048	1	1.039	0.990046	0.881573	0.621656	0.561866	0.618096	0.581955	11.2132	-0.140413	0	0.98721		-0.895832	0.65439	0.912174	11.6699	-0.133291	0	0.999554		-0.141583
O43924	PDE6D	11	4	1	1.04126	1.0765	0.955758	0.790633	0.94843	1.20078	0.997396	1	1.06569	1.08538	1.018	0.831222	1.20944	1.41547	1.37338	1	0.928979	1.00283	0.970786	0.791159	0.940848	0.883915	0.783451	1	1.03458	1.06702	0.983195	0.851741	1.05626	1.19847	1.16465		-0.0730784	0.978598	0.0236293		0.82014	1.39443	0.847971		-0.391258	0.849843	0.574206		0.441687
O43929	ORC4	17	16	1	1.06103	0.972954	0.77889	0.354269	0.139921	0.0922777	0.0541552	1	1.00559	0.952044	0.740266	0.330466	0.129748	0.0839845	0.0643266	1	1.01662	0.991952	0.777532	0.310758	0.13187	0.0878506	0.0570688	1	0.996786	0.97863	0.733921	0.302359	0.129786	0.0950861	0.0600282	10.8017	-0.159823	0.0119474	0.996741	10.5326	-0.159391	0.0115689	0.998528	10.5937	-0.179648	0.0373467	0.999733	10.3945	-0.171551
O43933	PEX1	14	13	1	1.01065	1.00334	0.792465	0.339204	0.135632	0.0848381	0.0543704	1	1.08489	0.983693	0.792667	0.361885	0.1129	0.0641148	0.0331312	1	0.997098	0.955275	0.757137	0.299193	0.129218	0.0776467	0.0476276	1	1.08284	1.02105	0.773923	0.333593	0.120738	0.0687763	0.055555	10.7785	-0.171596	0.0250878	0.999822	10.8573	-0.169096	0	0.994411	10.4866	-0.174483	0.021141	0.998813	10.6796	-0.171925
O60216	RAD21	26	23	1	0.995128	1.00745	0.863001	0.421256	0.133428	0.0695653	0.0496562	1	0.973414	0.990773	0.836832	0.398504	0.127595	0.0468629	0.0514238	1	1.01116	1.03396	0.877044	0.437263	0.146866	0.091741	0.0502067	1	0.997153	0.978604	0.846434	0.43136	0.13795	0.0681984	0.0498981	11.3866	-0.170564	0.00546078	0.999443	11.1873	-0.170205	0	0.998597	11.5158	-0.169478	0.0174457	0.998608	11.3783	-0.163336
O60218	AKR1B10	1		1	0.87591	17.2827	0.813187	0	2.00991	0.427439	0.261721									1	0.962448	1.39133	1.00181	0.630777	0.387585	0.286086	0.259823										-0.792627	0.674756	-0.10966					13.1501	-0.147499	0.254672	0.867704
O60220	TIMM8A	10	10	1	1.06632	1.17432	1.15806	0.840184	1.07816	1.28351	0.988544	1	1.03141	1.18525	1.19978	0.890568	1.21478	1.32294	1.3993	1	0.99277	1.00511	1.10941	1.03005	0.995884	1.0271	0.822762	1	1.01649	1.00055	0.922914	0.883996	0.878959	0.967669	1.10663			1.16831	0.0482077		0.169426	1.36314	0.557758			0	0.696039		-0.213288
O60229	KALRN	1	1	1	0.991838	1.07885	0.813873	0.662664	0.345713	0.220624	0.175914	1	0.952074	0.993979	0.977884	0.655652	0.27434	0.123676	0.0904709	1	0.992444	0.988927	0.956127	0.582993	0.305768	0.195165	0.144133	1	1.0127	1.12257	0.864334	0.665487	0.276148	0.0916092	0.0898027	13.1555	-0.0982878	0	0.982917	12.9954	-0.162637	0.0509976	0.997911	12.7064	-0.142705	0.112926	0.999401	12.9309	-0.140769
O60231	DHX16	34	39	1	1.01259	0.996401	0.861458	0.423396	0.155419	0.0796878	0.0406748	1	1.00638	1.00101	0.836221	0.415171	0.147511	0.09002	0.0535388	1	0.990415	0.992123	0.86257	0.442402	0.164777	0.0856849	0.0478226	1	1.00919	1.02323	0.868683	0.461271	0.171929	0.0904235	0.0480635	11.4275	-0.162721	0	0.999802	11.2886	-0.15916	0.00608004	0.99952	11.5299	-0.157708	0	0.999748	11.6514	-0.155821
O60232	SSSCA1	16	14	1	1.02808	1.05613	0.994992	0.767325	0.861517	0.925053	0.660915	1	1.00277	1.04469	0.979127	0.779524	0.899897	1.0383	0.912794	1	0.985302	0.951125	0.988168	1.6618	0.923925	1.58466	0.658729	1	1.05062	1.02119	0.927384	0.848936	0.882539	0.873168	0.813914		-0.536682	0.803703	0.677522		-0.240613	0.907627	0.358356		0.219575	1.20717	0.1207		-0.363318
O60234	GMFG		1									1	0.955927	1.07021	0.966664	0.638177	0.909368	0.991534	0.823555									1	0.903135	0.971056	0.982553	0.907181	1.11036	1.16389	0.634907						-0.42001	0.840658	0.401451
O60239	SH3BP5	7	1	1	0.997322	1.07121	0.977374	0.751886	0.906007	1.04015	0.758225	1	0.920022	1.08857	0.805447	0.389955	0.32013	0.492839	0.396366	1	1.01829	1.07154	1.02456	0.847385	0.923328	0.825653	0.613062	1	1.0109	0.93111	0.746517	0.472954	0.314879	0.444394	0.38899		-0.344365	0.864066	0.413472	9.18019	-1.96572	0.399823	0.9563		-0.0431187	0	0.837539	11.1477	-0.153445
O60243	HS6ST1	1	1	1	1.13516	1.01913	0.980422	0.567202	0.215483	0.0525616	0.0350956	1	0.640142	0.787404	0.552568	0.285212	0.279616	0.0771364	0.123081	1	0.960611	0.834827	0.76855	0.455463	0.253732	0.0925035	0	1	0.844144	0.628117	0.446243	0.286346	0.167589	0	0.153243	12.4549	-0.17676	0	0.986987	8.94068	-0.121092	0	0.80857	11.2692	-0.131462	0	0.967155	7.30378	-0.141842
O60244	MED14	36	32	1	1.03225	0.973728	0.792191	0.36243	0.145505	0.0767634	0.0548632	1	0.997074	0.928729	0.727293	0.328595	0.110013	0.0507749	0.0352215	1	1.02058	0.989106	0.77876	0.346582	0.156781	0.0798622	0.054977	1	0.985951	0.939695	0.720432	0.308985	0.1056	0.0619625	0.0421932	10.8967	-0.159755	0.00524344	0.998832	10.4365	-0.165149	0	0.996247	10.7952	-0.159693	0.0114619	0.99964	10.3506	-0.166495
O60256	PRPSAP2	27	26	1	1.07473	1.13119	1.03794	0.826833	0.908016	1.07224	0.856219	1	1.06944	1.08894	0.941355	0.811633	0.977195	1.13539	1.09613	1	1.03114	1.04648	0.974668	0.797015	0.846033	0.79251	0.622906	1	1.06399	1.03898	0.98982	0.817161	0.895181	0.973897	0.991204		-0.0406902	0.916587	0.297223		0.0630036	1.11637	0.315457		-0.0265446	0	0.875296		-0.203527
O60259-2	KLK8	1		1	0.978552	1.15005	0.868248	0.787822	0.937438	0.875408	0.903826									1	0.930549	1.0833	1.01955	0.803885	0.935052	0.754802	0.800173										-0.456706	0.874548	0.573892						-0.149973	0.823265	0.691469
O60264	SMARCA5	32	22	1	0.977218	0.917206	0.695838	0.256983	0.0789638	0.047983	0.0301344	1	0.971322	0.887632	0.689144	0.274709	0.0996609	0.0613733	0.0560461	1	0.987855	0.928523	0.677209	0.24271	0.0854951	0.0453616	0.0305199	1	0.969718	0.937382	0.678132	0.273096	0.100284	0.0732239	0.0565287	10.0641	-0.182371	0	0.995406	10.0732	-0.165442	0	0.991255	9.95415	-0.182572	0	0.997196	10.0435	-0.168433
O60266	ADCY3	4	6	1	0.964833	1.01375	0.818462	0.399307	0.183209	0.0602066	0.0345154	1	1.03551	1.04348	0.827619	0.454327	0.175758	0.0774728	0.0272708	1	1.01563	0.988351	0.851369	0.41444	0.174335	0.0738694	0.04363	1	0.982579	1.04448	0.802606	0.434385	0.194533	0.0665827	0.0176628	11.2017	-0.156188	0	0.998021	11.4728	-0.153158	0	0.996116	11.3783	-0.158312	0	0.999692	11.3088	-0.150358
O60268	KIAA0513	1	1	1	0.892472	0.960302	0.89529	0.486465	0.284832	0.182171	0.0822127	1	0.967415	1.04959	0.964415	0.487161	0.201135	0.0654001	0.0257997	1	1.04902	1.00745	0.964513	0.566426	0.331488	0.204151	0.0951112	1	0.980672	0.991994	0.877405	0.562315	0.198766	0.0890033	0.0642901	12.1206	-0.128544	0.0319381	0.984407	12.04	-0.176487	0.00607037	0.996066	12.8372	-0.127307	0.047147	0.993781	12.218	-0.150084
O60271-2	SPAG9	1		1	1.00171	1.13813	1.17735	0.769994	1.04622	0.9061	0.375349									1	1.02675	1.04443	1.11881	0.783407	1.04022	0.712817	0.365297									18.5298	-0.917623	0.375348	0.771374					18.2399	-1.00363	0.365297	0.854012
O60271	SPAG9	52	41	1	1.03351	1.05678	0.99695	0.869747	1.02671	1.00262	0.46761	1	1.03185	1.05551	0.96457	0.802768	1.02042	1.04823	0.506249	1	1.00909	1.04392	0.981814	0.856336	0.988538	0.822483	0.365427	1	1.05134	1.06853	1.02417	0.881307	0.984415	0.948392	0.526064						0	0	0.812109	20.1126	-0.165724	0	0.934203		-0.199625
O60281	ZNF292	2	2	1	1.14948	1.44033	1.11021	0.676776	0.455155	0.356865	0.181425	1	1.01919	1.1363	0.906526	0.650501	0.502534	0.385135	0.269996	1	1.00128	1.02587	0.810658	0.409894	0.297962	0.197069	0.155127	1	0.952339	1.06113	0.915482	0.533445	0.389024	0.304191	0.248406	14.1947	-0.115734	0.179825	0.82127	14.6692	-0.0798461	0.12133	0.969332	11.3312	-0.138712	0.134883	0.996806	12.5736	-0.127759
O60282	KIF5C	5	6	1	0.992256	1.06668	0.964317	0.543615	0.306381	0.158533	0.0782878	1	1.04277	1.1319	0.999171	0.610944	0.368351	0.18517	0.0678072	1	1.00046	1.02474	0.960885	0.599822	0.332808	0.145398	0.0846886	1	1.06992	1.12267	1.02038	0.670168	0.337753	0.173777	0.0794076	12.5929	-0.138065	0.0368084	0.99288	13.2735	-0.125263	0	0.978974	12.9868	-0.129262	0	0.997789	13.3988	-0.140015
O60287	URB1	22	11	1	1.04089	0.975663	0.720174	0.247087	0.130888	0.122272	0.0843775	1	1.03878	0.994986	0.762677	0.262355	0.101474	0.0608018	0.0564724	1	0.96908	0.899827	0.665203	0.235591	0.137634	0.109503	0.0711794	1	1.00756	0.950149	0.706694	0.228705	0.0997045	0.0705952	0.0521964	10.0763	-0.208717	0.0871929	0.998079	10.3359	-0.202848	0.0366841	0.998924	9.86219	-0.174994	0.0490784	0.992174	10.0155	-0.204105
O60290	ZNF862		1									1	0.84126	1.19341	0.978947	0.416965	0.51763	0.585508	0.66286									1	1.20938	1.01662	1.31714	0.777617	0.574885	0.314446	0.291096						-1.23245	0.545741	0.814846					15.3032	-0.1154
O60291-2	MGRN1	10	7	1	1.01182	1.09091	1.00088	0.704723	0.687548	0.718332	0.473901	1	0.882727	0.950459	0.952556	0.625196	0.605446	0.758185	0.520723	1	1.07805	1.09284	0.984328	0.668207	0.658841	0.554255	0.346788	1	0.932972	0.955084	0.944008	0.670157	0.602166	0.608186	0.398527						-0.984328	0.627388	0.811391	17.7108	-0.0557304	0	0.926535	18.6997	-0.0502974
O60292	SIPA1L3	2	2	1	1.35859	1.01071	0.924011	0.50808	0.361181	0.292814	0.223069	1	1.21378	1.08684	0.960635	0.648502	0.515299	0.433874	0.294822	1	0.971382	1.09551	0.936083	0.550295	0.390456	0.294029	0.265177	1	0.986258	1.12826	0.929808	0.608604	0.388257	0.305598	0.251276	12.2756	-0.141442	0.236312	0.891555	14.8672	-0.0851551	0.241503	0.923912	12.6659	-0.134024	0.256829	0.986267	13.1752	-0.118468
O60293	ZFC3H1	15	13	1	0.820513	0.759017	0.598588	0.316895	0.266435	0.273438	0.229472	1	1.01109	0.896367	0.739946	0.318455	0.280829	0.315324	0.328549	1	0.983507	0.972242	0.743268	0.416005	0.447441	0.386712	0.371398	1	0.9667	0.920218	0.708746	0.30116	0.29759	0.28811	0.213433	9.27039	-0.101226	0	0.935645	9.72279	-0.363511	0.308617	0.984314	10.532	-0.210585	0.396126	0.993101	9.99837	-0.226003
O60294	LCMT2	2	3	1	1.08446	1.13331	0.840584	0.372579	0.218914	0.201272	0.121443	1	0.993026	0.936819	0.722442	0.30608	0.127025	0.0771826	0.0450371	1	1.13392	1.2263	0.912712	0.470107	0.234161	0.202407	0.137607	1	0.923606	0.96099	0.742491	0.322416	0.131532	0.066512	0.0364032	11.0485	-0.17759	0.142032	0.97907	10.376	-0.160378	0	0.99784	11.7948	-0.16906	0.1413	0.950539	10.5269	-0.162877
O60296	TRAK2		2									1	0.939662	0.928121	0.846133	0.475091	0.263829	0.14182	0.185889									1	0.921933	0.978587	0.907766	0.367342	0.21787	0.145841	0.107098					11.7101	-0.136623	0.105382	0.988183					11.2384	-0.200223
O60303	KIAA0556	3	2	1	0.942119	1.03575	0.96036	0.545228	0.240184	0.207196	0.157467	1	1.17671	1.23411	0.951345	0.46806	0.192984	0.297457	0.236312	1	0.979749	1.03983	0.786344	0.489539	0.328109	0.161283	0.148869	1	0.831268	0.904725	0.684444	0.441801	0.222923	0.205137	0.136099	12.2636	-0.184059	0.159969	0.995009	11.7799	-0.251133	0.236898	0.930293	11.9412	-0.107179	0	0.994307	10.81	-0.107517
O60306	AQR	37	31	1	1.01471	1.02172	0.83186	0.397027	0.184011	0.103441	0.0814568	1	0.986807	0.92293	0.773955	0.364044	0.141502	0.0706883	0.0550378	1	0.986112	1.0076	0.797679	0.381532	0.177928	0.104939	0.0689202	1	0.981095	0.97877	0.764772	0.351283	0.151075	0.0787346	0.0564171	11.2104	-0.15925	0.0426688	0.999327	10.8094	-0.15564	0	0.995691	11.0337	-0.152709	0.0245449	0.999695	10.7574	-0.154934
O60313-2	OPA1	51	38	1	1.01932	1.00283	0.797929	0.353163	0.135704	0.0805133	0.0554918	1	0.989751	0.953679	0.76185	0.346646	0.133403	0.0926489	0.0737528	1	1.00715	0.989245	0.783389	0.334412	0.137707	0.0827087	0.0570845	1	0.982936	0.954061	0.77017	0.350579	0.136601	0.098915	0.0756032	10.8601	-0.16823	0.0184181	0.999596	10.6733	-0.161025	0.0244638	0.998218	10.7263	-0.170034	0.0245052	0.999916	10.7205	-0.161937
O60318	MCM3AP	10	9	1	0.993803	0.994709	0.827809	0.442987	0.262306	0.215654	0.118523	1	0.985907	0.976977	0.739643	0.341314	0.171116	0.141763	0.103349	1	0.977653	1.00067	0.798656	0.444638	0.270742	0.181122	0.127065	1	0.972236	0.936597	0.722886	0.295044	0.150985	0.110078	0.107582	11.5707	-0.131801	0.091607	0.997827	10.5622	-0.158603	0.0741122	0.999396	11.5214	-0.123608	0.056784	0.99913	10.2797	-0.175416
O60331-3	PIP5K1C	2		1	1.33283	1.26195	0.968297	0.582818	0.379349	0.271882	0.202181									1	0.928628	1.03275	0.865982	0.480965	0.386909	0.233172	0.151938									12.9608	-0.131389	0.193224	0.870035					12.3724	-0.108893	0.0785782	0.984371
O60333-2	KIF1B	44		1	1.05796	1.11056	0.999826	0.741285	0.488377	0.146636	0.0574601									1	1.03429	1.03341	0.956613	0.709837	0.459591	0.134182	0.057017									14.277	-0.133493	0	0.978389					13.9458	-0.130634	0	0.988487
O60333-3	KIF1B	3	3	1	1.05416	1.00937	0.856492	0.467757	0.328129	0.164189	0.0602658	1	0.968741	0.974227	0.797876	0.341229	0.169859	0.0548887	0.0413608	1	1.02792	1.05518	0.836075	0.47301	0.364344	0.143518	0.0638992	1	0.981501	0.939494	0.779907	0.358705	0.164993	0.0685318	0.0190501	12.0427	-0.119871	0	0.991487	10.8703	-0.162022	0	0.998108	12.078	-0.116957	0	0.986262	10.8455	-0.157554
O60333-4	KIF1B		33									1	1.00845	1.05462	0.926596	0.765205	0.543511	0.190095	0.0392503									1	1.03057	1.059	0.99079	0.748723	0.522504	0.182546	0.0427161					14.6669	-0.128409	0	0.979207					14.5166	-0.129243
O60336	MAPKBP1	4	2	1	1.07091	1.04631	0.755416	0.319193	0.104083	0.0689839	0.0444157	1	0.950281	0.913168	0.784674	0.28009	0.109122	0.0634737	0.0671161	1	1.05195	0.961664	0.743951	0.293281	0.140948	0.0657707	0.0389299	1	0.985118	0.98649	0.670301	0.254565	0.0914654	0.0765832	0.0744137	10.5493	-0.17521	0.00969677	0.994458	10.4713	-0.198292	0.0407418	0.992385	10.444	-0.168463	0.00634197	0.997153	9.93272	-0.190131
O60337	2021-03-06	4	1	1	0.991926	1.00918	0.880782	0.583646	0.420137	0.187266	0.0943482	1	0.953233	0.945609	0.832902	0.549954	0.416178	0.216674	0.032461	1	1.00057	1.04335	0.975361	0.651077	0.39884	0.205372	0.0784093	1	0.989976	0.979159	0.894198	0.598101	0.407025	0.194737	0.0609445	13.0633	-0.107133	0	0.99145	12.6647	-0.105758	0	0.97399	13.5809	-0.118613	0	0.994495	13.1197	-0.112071
O60341-2	KDM1A		28									1	1.02865	1.02459	0.909292	0.537528	0.294543	0.147902	0.107802									1	0.995294	1.01861	0.915059	0.54789	0.281698	0.147742	0.0912328					12.416	-0.130505	0.0326051	0.99814					12.4604	-0.132401
O60341	KDM1A	32		1	1.0043	0.994226	0.868527	0.521203	0.240248	0.102851	0.0583483									1	0.995741	0.981815	0.86202	0.515467	0.23766	0.107186	0.0621647									12.0664	-0.139079	0	0.999173					12.0121	-0.137406	0	0.999084
O60343	TBC1D4	46	35	1	1.03235	1.02071	0.912854	0.489694	0.198644	0.0844098	0.0511868	1	1.00251	1.0239	0.900596	0.496253	0.208909	0.0956401	0.0393823	1	1.02535	1.04501	0.904771	0.465612	0.193054	0.0842288	0.050413	1	1.01596	1.02786	0.929322	0.525694	0.201154	0.0904498	0.0524849	11.9481	-0.159992	0.00671781	0.998849	11.9768	-0.153189	0	0.999374	11.7999	-0.162318	0.0118765	0.99792	12.1615	-0.16287
O60344-4	ECE2	3		1	0.702613	0.740499	0.709334	0.395029	0.190739	0.0899485	0.0547181									1	0.900805	0.96863	0.886904	0.775126	0.301658	0.0972624	0.0649694									10.2879	-0.123969	0	0.832506					13.5826	-0.168576	0.00908818	0.980596
O60344	ECE2		2									1	0.878202	0.892023	0.923924	0.530972	0.207349	0.0469717	0.0164207									1	0.912347	0.987667	0.959742	0.682228	0.385787	0.0387303	0.0117483					12.1777	-0.170217	0	0.976883					13.4069	-0.156501
O60346	PHLPP1	3	3	1	1.20624	1.4086	1.03149	0.581527	0.247781	0.119371	0.0428315	1	0.933283	1.05341	0.966886	0.503636	0.228075	0.180471	0.0471019	1	1.10534	1.05993	0.882122	0.510034	0.22388	0.115863	0.0455756	1	1.05638	1.16902	1.06712	0.583258	0.253365	0.135052	0.0791409	12.6251	-0.174563	0.0404523	0.889167	12.1451	-0.167657	0.0717437	0.988646	12.0346	-0.143754	0	0.988955	12.5793	-0.191968
O60353	FZD6	11	11	1	1.0171	1.02716	0.856325	0.511936	0.305581	0.158627	0.109464	1	1.00939	1.05379	0.90324	0.499737	0.347569	0.253622	0.168776	1	1.00105	0.986291	0.840035	0.481191	0.274271	0.145473	0.0931331	1	1.01011	1.05936	0.922841	0.508211	0.326536	0.23281	0.156311	12.2227	-0.117184	0	0.998168	12.2839	-0.12876	0.158345	0.992814	11.897	-0.122624	0	0.999611	12.2886	-0.137109
O60361	NME2P1	1	3	1	0.918285	0.982459	0.962648	0.713835	1.02473	1.35797	1.0758	1	0.877729	0.904974	0.922848	0.769916	1.25873	1.68663	1.87391	1	0.77441	0.825504	0.822322	0.69513	1.03301	1.00898	0.945815	1	0.948768	1.12914	1.1105	1.07945	1.46977	1.71393	1.68449		0.471899	1.21689	0.420871		0.988645	1.5	0.780927						0.232149
O60427	FADS1	5	9	1	0.970903	0.946761	0.781758	0.345368	0.117023	0.0710345	0.0369902	1	0.962119	0.948035	0.776574	0.372598	0.160499	0.0948312	0.0523102	1	0.953048	0.92807	0.765464	0.339402	0.123605	0.0695675	0.0386589	1	0.982486	0.950214	0.780311	0.36384	0.165293	0.0930957	0.0604839	10.7538	-0.166787	0	0.997282	10.896	-0.149174	0	0.997174	10.6654	-0.163337	0	0.994722	10.8807	-0.150799
O60437	PPL	54	29	1	0.967499	5.13508	0.900458	0.456215	0.906757	0.31044	0.148864	1	0.980615	1.05688	0.927882	0.651551	0.568432	0.396809	0.177971	1	0.978199	1.03786	0.942989	0.672716	0.494333	0.295819	0.157564	1	0.990124	1.04795	0.949242	0.702029	0.565178	0.370475	0.188944	15.7215	-0.0808116	0	0.0458178	14.9978	-0.0783485	0	0.970546	14.3536	-0.0928971	0	0.992224	15.1993	-0.0825935
O60443	DFNA5	10	9	1	1.06928	1.04293	0.955972	0.583973	0.243104	0.0629493	0.0269914	1	0.961329	1.02977	0.878686	0.579446	0.363367	0.16547	0.0951954	1	1.0218	1.0114	0.907277	0.572639	0.234141	0.0886961	0.0453425	1	0.978232	1.0814	0.923747	0.587549	0.299864	0.143344	0.119368	12.5651	-0.165894	0	0.994442	12.8123	-0.114105	0	0.994514	12.4194	-0.151764	0	0.998635	12.7105	-0.133488
O60447	EVI5	11	6	1	1.03539	1.03295	0.835629	0.373473	0.177446	0.118255	0.0880807	1	1.01988	0.987066	0.786132	0.31694	0.116768	0.058896	0.0589593	1	0.992493	0.9581	0.791096	0.365456	0.181865	0.107294	0.077931	1	1.03144	1.00844	0.762029	0.319705	0.118225	0.0683788	0.0669059	11.0766	-0.171488	0.0691046	0.998062	10.646	-0.181291	0.0219318	0.999446	10.925	-0.153876	0.0351576	0.998842	10.5624	-0.175827
O60476	MAN1A2	13	8	1	0.957899	0.926976	0.757392	0.370447	0.161896	0.100244	0.0708923	1	1.00774	1.01854	0.830405	0.416644	0.245491	0.160031	0.123509	1	0.957358	0.929732	0.744025	0.371713	0.179511	0.103962	0.0773931	1	1.04259	1.02367	0.866322	0.41573	0.208658	0.141244	0.103694	10.7984	-0.143413	0	0.995031	11.3606	-0.1464	0.0930519	0.999099	10.7666	-0.138053	0	0.995636	11.4027	-0.163628
O60487	MPZL2	3	3	1	1.0569	1.17798	1.10239	0.884598	1.10859	1.33601	1.08482	1	0.968263	1.01702	0.984476	0.871544	1.06189	1.24864	1.26948	1	0.925169	0.977316	0.941247	0.813424	0.916397	0.855117	0.687525	1	1.1786	1.20655	1.01023	0.953563	0.957637	1.09591	1.14382			1.26815	0.104865		0.0959934	1.26807	0.864986		-0.0181905	0	0.637794		0.225886
O60488	ACSL4	42	37	1	1.01245	0.995948	0.826744	0.412724	0.173033	0.082404	0.0602298	1	0.983	0.965702	0.772371	0.412951	0.161541	0.0670639	0.0360473	1	1.00412	0.954317	0.785605	0.388791	0.166034	0.0831979	0.0523822	1	0.990487	0.946617	0.775122	0.405768	0.163627	0.070759	0.0391435	11.2858	-0.151733	0	0.999779	11.0215	-0.150156	0	0.997282	11.0001	-0.149437	0	0.998655	11.0045	-0.149655
O60493	SNX3	16	13	1	1.09094	1.08533	0.997008	0.73895	0.457631	0.156985	0.0761599	1	1.06496	1.08393	1.04058	0.777409	0.505563	0.224487	0.0908717	1	0.984182	1.00314	0.957748	0.74642	0.435641	0.146597	0.0671963	1	0.926002	0.998982	0.905778	0.707126	0.463657	0.194286	0.0785767	14.1622	-0.13089	0	0.982644	14.7169	-0.123053	0	0.983768	14.0528	-0.134559	0	0.995743	13.991	-0.115131
O60499	STX10	10	7	1	0.939816	1.03719	0.913509	0.676072	0.66499	0.574485	0.341279	1	1.03947	1.05006	0.926355	0.735145	0.836217	0.790628	0.390966	1	1.067	1.08092	1.05919	0.792826	0.774594	0.600655	0.32549	1	1.00481	0.932054	0.877071	0.729172	0.70024	0.622761	0.364835	17.9647	-0.0524937	0	0.935073		-0.0412935	0	0.763342	18.6849	-0.0667191	0	0.923997	19.5846	-0.0462754
O60502	MGEA5	50	44	1	1.03276	1.02198	0.861581	0.475358	0.180182	0.0630981	0.0325557	1	0.980993	0.981666	0.82095	0.42904	0.169299	0.0483724	0.0154154	1	1.01809	0.972404	0.80071	0.431064	0.163939	0.0572406	0.026249	1	0.998407	0.995736	0.828228	0.446156	0.176891	0.0609553	0.0234567	11.6944	-0.158581	0	0.997733	11.3033	-0.159573	0	0.997358	11.2213	-0.154578	0	0.99708	11.4258	-0.155754
O60503	ADCY9		6									1	1.02361	1.0219	0.896446	0.504332	0.33679	0.222603	0.135886									1	0.98761	0.978692	0.827147	0.504954	0.307406	0.204752	0.122527					12.3493	-0.121598	0.0909705	0.995588					12.1392	-0.108057
O60504	SORBS3	17	13	1	1.11863	0.858323	0.776394	0.604855	0.690291	0.823283	0.707462	1	1.00737	1.07761	0.999378	0.776297	0.965146	1.1801	1.15369	1	0.97926	1.02918	0.96124	0.783241	0.878281	0.859557	0.752227	1	1.00559	1.07855	0.988841	0.815826	0.915689	1.04691	0.987768		-0.0988379	0.713654	0.793557		0.15081	1.02537	0.00664578		-0.472448	0.818327	0.8356		-0.140275
O60506-3	SYNCRIP	1	1	1	0.887363	1.01125	0.773655	0.439605	0.2274	0.136841	0.130838	1	0.949841	0.895732	0.742394	0.67405	0.4721	0.326453	0.0896352	1	1.04369	1.04146	0.895591	0.526144	0.313091	0.136205	0.109762	1	0.900775	0.887948	0.852105	0.654042	0.54424	0.250503	0.105867	11.2767	-0.130102	0.0430621	0.986484	13.4071	-0.0828793	0	0.932627	12.3959	-0.124286	0.011491	0.995002	14.0014	-0.0923782
O60506	SYNCRIP	75	70	1	0.993086	1.01419	0.907422	0.677641	0.410417	0.0965967	0.0579994	1	1.00982	1.04761	0.919874	0.696658	0.489064	0.110382	0.0528494	1	0.994024	0.992129	0.906283	0.681107	0.405136	0.100102	0.0595328	1	1.00305	1.04429	0.918955	0.691772	0.455521	0.118865	0.054644	13.4785	-0.133003	0	0.988181	13.9157	-0.128473	0	0.97774	13.4816	-0.133111	0	0.989196	13.766	-0.128691
O60507	TPST1	4	2	1	1.01025	1.02209	0.863018	0.501157	0.240691	0.0886234	0.0791087	1	1.033	1.07687	0.939739	0.548946	0.327554	0.214122	0.129357	1	0.988028	1.05118	0.926087	0.515379	0.256567	0.127811	0.0673726	1	1.05359	1.0552	0.992193	0.59997	0.316626	0.19042	0.104714	11.9488	-0.138401	0	0.998362	12.6299	-0.130125	0.0954079	0.991341	12.235	-0.144607	0.0212477	0.99697	12.9147	-0.142121
O60508	CDC40	6	8	1	0.975071	0.987398	0.795744	0.405896	0.2039	0.101389	0.0527551	1	0.994042	0.965853	0.770576	0.390308	0.130464	0.0645042	0.0477039	1	1.02947	1.00195	0.796239	0.447388	0.167542	0.0947335	0.065418	1	0.97374	0.92821	0.734141	0.374252	0.150992	0.0629724	0.0377306	11.1916	-0.141331	0	0.999184	10.8857	-0.156602	0	0.9979	11.3064	-0.143496	0	0.997697	10.6664	-0.150587
O60512	B4GALT3	2	3	1	0.986738	0.967771	0.882908	0.569339	0.342289	0.159263	0.0860286	1	1.06233	1.03969	0.991278	0.601211	0.4559	0.226064	0.0859159	1	1.02174	1.04712	0.981514	0.617965	0.351345	0.155659	0.0993203	1	1.09348	1.13882	1.04125	0.678771	0.444913	0.231911	0.0919955	12.6819	-0.117526	0	0.996854	13.6348	-0.109248	0	0.980346	13.1693	-0.128969	0.0152375	0.995096	14.051	-0.115719
O60513	B4GALT4	2	2	1	0.887835	0.954214	0.933883	0.595321	0.317619	0.0875952	0.0398609	1	0.990634	1.1034	0.905902	0.563192	0.394168	0.326088	0.249391	1	0.897733	1.03803	0.967519	0.659203	0.249866	0.0899917	0.0323855	1	0.961931	1.12987	0.978534	0.598479	0.432913	0.320862	0.205951	12.7839	-0.142882	0	0.983036	12.8855	-0.116326	0.234311	0.984707	12.9632	-0.167858	0	0.990606	13.4944	-0.111315
O60518	RANBP6	10	29	1	1.00362	1.00057	0.89041	0.510906	0.229283	0.0528464	0.0357639	1	1.02648	1.06141	0.911326	0.612311	0.355845	0.190188	0.0473303	1	0.995714	1.04498	0.901882	0.49365	0.213006	0.0786621	0.0314444	1	1.02445	1.02878	0.926705	0.597785	0.342819	0.181838	0.0525142	12.0347	-0.155058	0	0.997828	13.0622	-0.12122	0	0.99178	11.9673	-0.15664	0	0.997942	12.9693	-0.123651
O60524	NEMF	32	28	1	1.07363	1.04978	0.894376	0.502494	0.305241	0.135606	0.0418717	1	0.989319	0.962357	0.825084	0.466058	0.277756	0.157306	0.0219121	1	1.01269	0.976717	0.829247	0.430754	0.281177	0.124004	0.039289	1	0.991538	0.984999	0.832602	0.4679	0.291038	0.15073	0.0418843	12.2381	-0.130951	0	0.990042	11.7468	-0.126805	0	0.993546	11.5917	-0.13077	0	0.995174	11.826	-0.124999
O60551	NMT2	11	10	1	0.993733	1.01094	0.902643	0.4701	0.255923	0.171726	0.141384	1	0.976558	1.045	0.944696	0.460663	0.186686	0.104767	0.073585	1	0.955859	0.99782	0.907179	0.498497	0.253242	0.150196	0.11894	1	1.00949	1.04572	0.94664	0.493568	0.194545	0.0921003	0.0645705	11.8295	-0.156167	0.121173	0.999577	11.8082	-0.188892	0.0654545	0.997803	12.0326	-0.148501	0.0807275	0.998094	11.9981	-0.178966
O60563	CCNT1	14	8	1	0.97115	0.962456	0.790442	0.364222	0.16295	0.0639996	0.0383979	1	0.960758	0.949564	0.820945	0.391222	0.149106	0.0620153	0.050975	1	0.964826	0.986847	0.799297	0.371518	0.152489	0.0699818	0.0457757	1	0.945241	0.962084	0.781301	0.395011	0.148795	0.0659505	0.0429222	10.9153	-0.15784	0	0.99829	11.1225	-0.160732	0	0.996802	10.9746	-0.159016	0	0.998944	10.9738	-0.154649
O60566-3	BUB1B	43	37	1	1.01733	0.965084	0.806649	0.419436	0.21201	0.152411	0.0896717	1	0.982809	1.00063	0.824065	0.468267	0.345806	0.335739	0.260978	1	1.01636	1.01013	0.839966	0.421627	0.229748	0.147182	0.0891916	1	1.02183	1.02973	0.859181	0.472503	0.32478	0.298173	0.243428	11.293	-0.137304	0.0364216	0.998707	11.6923	-0.134576	0.269661	0.997159	11.4367	-0.145032	0.0558465	0.999066	11.7577	-0.143581
O60568	PLOD3	33	27	1	0.983812	0.98723	0.92223	0.686416	0.43626	0.101104	0.0557563	1	0.973645	1.01625	0.894261	0.650987	0.481638	0.121731	0.0255967	1	1.02519	1.04268	0.970415	0.752197	0.48488	0.13395	0.0636332	1	0.990561	1.00875	0.923512	0.710046	0.499636	0.126639	0.0253545	13.6446	-0.13237	0	0.986256	13.5803	-0.122992	0	0.972069	14.2744	-0.135301	0	0.988844	14.0543	-0.131309
O60573	EIF4E2	14	8	1	1.06544	0.998232	0.892919	0.498903	0.273665	0.112537	0.042738	1	0.918199	0.958211	0.851347	0.476727	0.285548	0.141038	0.0438216	1	1	0.962423	0.840775	0.485617	0.249966	0.110606	0.0531973	1	1.00272	0.992966	0.87415	0.53018	0.316192	0.129171	0.0616693	12.1117	-0.137824	0	0.994765	11.911	-0.127756	0	0.989271	11.8118	-0.133855	0	0.997869	12.3338	-0.125654
O60583	CCNT2	4	3	1	0.973342	0.923965	0.739905	0.322833	0.157014	0.0863815	0.0583867	1	1.04961	0.999312	0.751161	0.304874	0.176485	0.116491	0.0710243	1	1.01763	0.981076	0.763015	0.318681	0.166796	0.0929362	0.0522336	1	0.955996	0.956029	0.721537	0.288471	0.139705	0.0925326	0.0845175	10.5387	-0.15125	0.000519816	0.995922	10.4949	-0.171079	0.0625726	0.997412	10.6258	-0.16314	0.0262575	0.999209	10.2734	-0.175959
O60610	DIAPH1	74	71	1	1.05234	1.01255	0.899584	0.49592	0.170774	0.0411986	0.0240877	1	0.993644	1.00281	0.86466	0.490767	0.179655	0.0651466	0.0451279	1	1.01716	1.01261	0.869284	0.476856	0.164049	0.0518583	0.0284055	1	1.01506	1.02332	0.878176	0.489943	0.183949	0.0702692	0.0461339	11.8973	-0.173761	0	0.996966	11.7767	-0.156889	0	0.998647	11.7027	-0.165781	0	0.998311	11.8273	-0.157803
O60613	2021-09-15	9	7	1	0.954129	1.00757	0.909674	0.683685	0.364995	0.251835	0.121171	1	1.02895	1.03666	0.998094	0.637766	0.425894	0.387897	0.242773	1	0.978225	0.988567	0.935497	0.728409	0.371832	0.223636	0.109794	1	0.978694	1.09937	0.95192	0.627227	0.45499	0.294794	0.195157	13.6224	-0.107447	0	0.995018	13.6658	-0.119145	0.265645	0.985393	13.8542	-0.117759	0	0.997788	13.9139	-0.0963153
O60637	TSPAN3	3	3	1	1.01942	0.913793	0.928624	0.81111	1.1389	1.40085	1.25324	1	1.03998	1.00095	0.946957	0.807355	1.16675	1.4449	1.54575	1	1.00948	1.14393	1.07427	0.985545	1.33859	1.27628	1.28172	1	1.01615	1.07796	0.988132	0.898837	0.957218	1.32898	1.33379		0.843295	1.32705	0.776022		0.159044	1.5	0.900382		0.229329	1.29942	0.795129		0.683454
O60645	EXOC3	23	17	1	1.02308	0.992749	0.722952	0.260602	0.0965736	0.0524268	0.0452339	1	0.962573	0.869371	0.659772	0.235551	0.0657758	0.0457426	0.0359362	1	0.984088	0.919478	0.681135	0.237742	0.102417	0.0595455	0.0373467	1	0.978674	0.903654	0.673986	0.226943	0.0797298	0.0638177	0.0422714	10.2018	-0.190356	0.017507	0.999571	9.81153	-0.181304	0	0.987881	9.96543	-0.178801	0.00465693	0.996134	9.8831	-0.187345
O60658	PDE8A	5		1	1.19902	1.08569	0.967617	0.732784	0.686979	0.701887	0.640122									1	0.967057	1.04608	0.898851	0.570433	0.575829	0.556372	0.422222										-0.0964096	0.671446	0.844594						-0.125316	0.50161	0.962913
O60664-2	PLIN3		1									1	0.861979	0.740405	0.943031	0.663298	0.718769	0.40569	0.0501561									1	0.912723	0.903194	0.85438	0.814937	1.29489	0.756317	0.0690858					15.6657	-0.0904711	0	0.748285					18.1911	-1.43264
O60664	PLIN3	53	45	1	1.01077	1.03876	0.993889	0.867543	0.912418	0.471578	0.0840557	1	1.00555	1.01657	0.851359	0.635865	1.00497	0.646597	0.0818759	1	1.03178	1.03699	1.01022	0.923099	0.983663	0.440883	0.0953666	1	1.04262	0.643643	0.864469	0.686262	0.935439	0.55632	0.131382	17.7814	-0.199287	0	0.975704					17.791	-0.298384	0.0697654	0.990315	18.2425	-0.188053
O60669	SLC16A7	3	2	1	0.995638	1.09961	0.965114	0.431418	0.211037	0.140193	0.0796588	1	1.04383	0.9484	0.804473	0.418115	0.187459	0.0573504	0.0289951	1	0.99224	0.847168	0.702682	0.360269	0.151534	0.0525208	0.0283486	1	0.963773	1.03403	0.78906	0.418806	0.174995	0.0853263	0.0503425	11.7	-0.203548	0.103969	0.99046	11.2118	-0.151621	0	0.995146	10.389	-0.14738	0	0.981948	11.1709	-0.147113
O60671	RAD1	6	5	1	1.00046	1.00678	0.937229	0.605663	0.414998	0.335644	0.200108	1	1.01788	1.04974	0.966895	0.658231	0.543018	0.478882	0.255301	1	1.0172	1.03668	0.93785	0.61409	0.49673	0.324243	0.195178	1	1.02831	0.885883	0.940544	0.670453	0.475382	0.34999	0.274585	13.5608	-0.100242	0.136199	0.993763	15.6918	-0.0688285	0	0.968533	14.2336	-0.0846293	0	0.987924	14.4793	-0.0860547
O60673	REV3L	1		1	0.805594	1.1754	0.750651	0.124379	0.0957966	0.168514	0									1	1.19343	1.32214	0.917805	0.224806	0	0.144995	0.000496026									9.69927	-0.369732	0.0859139	0.945728					10.7175	-0.307367	0.0428184	0.928825
O60674	JAK2	1	2	1	0.929358	1.10198	0.827848	0.364228	0.176699	0.223175	0.111179	1	1.03404	1.07033	0.99254	0.427302	0.356216	0.161736	0.256903	1	1.03122	1.07256	0.838653	0.45109	0.192011	0.144523	0.0623963	1	1.1134	1.0342	0.923659	0.451863	0.216377	0.0609725	0.0804937	10.913	-0.183919	0.138773	0.981879	11.6619	-0.233789	0.244842	0.979159	11.5488	-0.144312	0.0212864	0.993767	11.7801	-0.170901
O60678	PRMT3	17	17	1	1.03519	0.988628	0.775949	0.33601	0.115099	0.0551819	0.0369299	1	1.0014	1.02589	0.820994	0.393136	0.160428	0.0665442	0.0245032	1	0.986811	0.964843	0.730425	0.303105	0.108447	0.0563052	0.0376409	1	1.02366	1.01179	0.835393	0.39864	0.168868	0.0925581	0.0396002	10.6985	-0.171088	0	0.998883	11.1572	-0.161724	0	0.99897	10.3877	-0.17071	0	0.999194	11.2578	-0.156399
O60684	KPNA6	11	14	1	1.00267	1.00429	0.852508	0.416366	0.192426	0.0814503	0.0532078	1	1.04097	1.00739	0.789459	0.41721	0.162281	0.0533572	0.0302473	1	0.977079	1.01057	0.795854	0.406352	0.188637	0.0891143	0.051579	1	1.02592	0.945869	0.818952	0.415168	0.162481	0.0747865	0.025456	11.4227	-0.153606	0.00279204	0.999723	11.1199	-0.155106	0	0.996674	11.1673	-0.145837	0	0.999127	11.2311	-0.156298
O60701	UGDH	46	42	1	1.07547	1.04527	0.882031	0.515064	0.217789	0.057569	0.0315946	1	1.00684	0.99255	0.823831	0.51224	0.248009	0.091784	0.0430086	1	1.01401	0.947571	0.791212	0.440322	0.194792	0.0665275	0.0330197	1	1.03954	1.00234	0.848878	0.503525	0.23895	0.0933489	0.0493391	12.016	-0.155877	0	0.992679	11.8618	-0.135329	0	0.996198	11.2625	-0.145301	0	0.995483	11.9011	-0.139224
O60704	TPST2		1									1	0.988331	1.16576	0.753493	0.415386	0.200604	0.145629	0									1	1.07133	1.01666	0.937972	0.343983	0.188054	0	0.087207					11.1249	-0.140284	0	0.972962					11.2675	-0.222204
O60716	CTNND1	46	35	1	1.05095	1.00253	0.762386	0.328349	0.10451	0.0561983	0.0381338	1	1.02462	0.9394	0.748932	0.307999	0.106942	0.0743789	0.0592988	1	1.02679	0.9402	0.706239	0.274408	0.0925144	0.0564831	0.0389471	1	0.98503	0.948014	0.752534	0.301463	0.109992	0.0676601	0.0399088	10.6086	-0.172509	0	0.997771	10.457	-0.173715	0.018314	0.996948	10.1769	-0.175443	0	0.997482	10.4717	-0.173491
O60725	ICMT	3	2	1	0.969941	0.905188	0.703445	0.35169	0.154979	0.149671	0.15131	1	0.91447	0.779737	0.675974	0.256213	0.0464406	0	0.00477928	1	0.97305	0.900966	0.723113	0.383178	0.149484	0.127133	0.132195	1	0.89613	0.856968	0.622528	0.262377	0.0583035	0.0140823	0	10.377	-0.145566	0.077229	0.990545	9.88505	-0.189236	0	0.956388	10.6181	-0.136093	0.0302897	0.989562	9.65377	-0.178535
O60733	PLA2G6	3	2	1	0.95927	0.993258	0.861361	0.388077	0.161947	0.125199	0.084297	1	1.04827	0.961729	0.789978	0.318003	0.0841225	0.0447562	0.0275443	1	1.00752	0.969726	0.792734	0.365082	0.215179	0.096686	0.0628409	1	1.07701	0.933975	0.725213	0.350661	0.0879792	0.0823155	0.0188171	11.2039	-0.177722	0.0704764	0.998369	10.6533	-0.185818	0	0.997127	11.0183	-0.144311	0.00887485	0.998252	10.4837	-0.162884
O60749	SNX2	32	23	1	0.982899	1.60543	0.921321	0.575456	0.257434	0.103504	0.0639992	1	0.983728	1.01804	0.918781	0.607278	0.270156	0.07336	0.0439135	1	1.00734	1.03332	0.947497	0.605638	0.255835	0.106967	0.0551637	1	0.983868	0.986475	0.930084	0.639997	0.244194	0.0817519	0.0467938	12.5495	-0.146626	0	0.816879	12.6925	-0.152507	0	0.997379	12.7227	-0.150861	0	0.999057	12.8199	-0.161601
O60762	DPM1	17	12	1	0.975964	0.915374	0.72011	0.310642	0.0979342	0.0461779	0.0241941	1	0.95094	0.906278	0.67426	0.293557	0.0923494	0.0312282	0.0163555	1	0.967628	0.896164	0.681542	0.29562	0.102685	0.0407613	0.0273226	1	0.952597	0.941085	0.686523	0.28102	0.0921641	0.0382401	0.023038	10.3312	-0.171015	0	0.99439	10.0506	-0.171531	0	0.991542	10.0941	-0.166912	0	0.992008	10.0979	-0.17582
O60763-2	USO1		55									1	0.988064	0.935332	0.75177	0.352832	0.0935263	0.0262147	0.0204004									1	1.00722	0.955805	0.749556	0.345654	0.0958845	0.0340763	0.0161011					10.6035	-0.17303	0	0.994536					10.5793	-0.17328
O60763	USO1	68		1	1.04405	0.9947	0.803096	0.379581	0.116234	0.0475962	0.0336406									1	1.05287	0.979053	0.761508	0.323031	0.10907	0.0509188	0.0372119									10.9657	-0.17023	0	0.997668					10.5851	-0.172706	0	0.997643
O60765	ZNF354A	1	1	1	1.34011	0.90557	0.652291	0.532873	0.205978	0.256473	0.102999	1	1.14342	0.966502	0.72693	0.344761	0.273475	0.295051	0.215826	1	0.991058	1.05855	0.883234	0.561563	0.366275	0.232896	0.119351	1	1.04557	1.07091	0.754243	0.435644	0.276847	0.227575	0.162688	11.0085	-0.10228	0	0.893208	10.3517	-0.182686	0.243375	0.976137	12.8898	-0.104615	0	0.993827	11.2413	-0.128532
O60783	MRPS14	3	4	1	0.988036	1.11589	0.915827	0.510912	0.295546	0.207214	0.130466	1	1.0282	0.999013	0.90074	0.42706	0.177395	0.0563272	0.0274689	1	1.0745	1.02763	0.90462	0.489103	0.254357	0.172319	0.106146	1	1.05653	1.06466	0.934572	0.47769	0.179753	0.072344	0.0310062	12.2313	-0.139733	0.113027	0.986348	11.5901	-0.17107	0	0.998917	11.9942	-0.146915	0.0827629	0.994094	11.9097	-0.174481
O60784-2	TOM1		9									1	1.02911	1.0912	0.982901	0.814363	1.10469	1.22101	0.42883									1	1.07526	1.10628	1.04499	0.935562	1.02231	1.02292	0.494203					20.9585	0	0	0.750976					20.9959	-1.40222
O60784	TOM1	12		1	0.983108	1.22733	0.96133	0.801267	1.00963	0.972189	0.427615									1	1.03823	1.07146	1.03951	0.884426	1.06815	0.843612	0.341689																	18.3851	-0.99019	0.341689	0.937846
O60825	PFKFB2	19	12	1	0.973744	1.11088	0.928806	0.657349	0.58263	0.471265	0.298553	1	0.963512	1.06324	0.909387	0.677439	0.603004	0.486494	0.305875	1	0.981674	1.036	0.993963	0.735628	0.640937	0.432122	0.260437	1	0.953552	0.970593	0.893595	0.687182	0.547155	0.449816	0.286332	16.0724	-0.0639773	0	0.958042	16.4181	-0.061254	0	0.970306	16.3727	-0.0734781	0	0.979972	15.6983	-0.0651329
O60826	CCDC22	17	19	1	1.01427	1.07685	0.920163	0.532087	0.184511	0.0724127	0.0472557	1	1.01558	1.06393	0.922056	0.579827	0.259591	0.161136	0.106736	1	0.985786	1.00248	0.913586	0.550264	0.170651	0.0827741	0.0507957	1	0.999459	1.01044	0.919045	0.606135	0.256815	0.139896	0.101388	12.15	-0.166412	0	0.995367	12.5457	-0.142687	0.0566734	0.996024	12.2022	-0.168221	0.00395362	0.998624	12.6718	-0.143513
O60828	PQBP1	13	9	1	0.933943	2.41825	0.90553	0.717045	1.09367	1.0584	0.872283	1	0.938272	1.01216	0.899318	0.747655	0.947999	1.14915	1.12782	1	1.00147	1.04246	1.00031	0.81168	0.960975	0.936783	0.763591	1	1.04503	1.07311	0.947777	0.843735	0.99157	1.1115	1.02681		-0.219131	0.929386	-0.0497133		-0.132057	0.974389	-0.00576952		-0.256693	0.868257	0.579384		0.00802787
O60830-2	TIMM17B	1	2	1	1.30288	1.2238	1.08398	0.526231	0.244059	0.0677331	0	1	1.01147	0.970736	0.833337	0.549572	0.31105	0.16837	0.0612347	1	1.0014	0.843517	0.64352	0.324329	0.126828	0.0314289	0.0181723	1	0.974377	0.947232	0.94015	0.407686	0.166182	0.107442	0.0562481	12.418	-0.184258	0.00598777	0.918503	12.308	-0.117342	0	0.995445	9.89554	-0.152071	0	0.982422	11.5302	-0.204098
O60831	PRAF2	3	4	1	1.01092	0.943864	0.876765	0.590156	0.437072	0.228137	0.117826	1	1.05238	1.03647	0.989591	0.644982	0.442366	0.319598	0.16023	1	1.0282	1.00861	0.926117	0.672622	0.455985	0.247113	0.126199	1	0.990907	1.03629	0.876762	0.579859	0.390084	0.261913	0.151652	13.2336	-0.0988267	0	0.98933	14.0724	-0.09793	0.0431902	0.986311	13.9642	-0.101968	0	0.995491	13.1488	-0.0964837
O60832	DKC1	25	28	1	0.965123	0.979927	0.80596	0.555992	0.560887	0.57234	0.429109	1	0.962209	0.966255	0.824832	0.510286	0.537549	0.593274	0.506207	1	1.00143	1.00512	0.856279	0.610452	0.612053	0.516966	0.391514	1	0.970436	0.978848	0.806275	0.543136	0.517671	0.538618	0.447935		-0.100653	0.48983	0.965289		-1.48745	0.536829	0.97858	17.15	-0.0581891	0.220395	0.972989	16.3727	-0.129211
O60841	EIF5B	78	47	1	1.03419	1.00158	0.79403	0.334632	0.094909	0.037253	0.0208365	1	0.974116	0.919016	0.739	0.318696	0.101111	0.0496228	0.0282823	1	1.00322	0.951188	0.759042	0.29727	0.0966122	0.0441647	0.0253591	1	0.998271	0.939086	0.728967	0.319227	0.1122	0.0550476	0.0334127	10.7391	-0.183262	0	0.998612	10.4475	-0.170971	0	0.994756	10.4711	-0.181766	0	0.9985	10.4232	-0.166512
O60858-3	TRIM13	6	2	1	1.04979	1.05171	0.887897	0.47839	0.190575	0.0653624	0.0390029	1	0.926597	0.892963	0.802697	0.426587	0.168902	0.0856773	0.042836	1	1.02335	1.0245	0.821171	0.441341	0.182726	0.074466	0.0553666	1	0.982652	0.989172	0.818208	0.466666	0.166638	0.0715997	0.0699071	11.8128	-0.160437	0	0.99595	11.2103	-0.14731	0	0.985491	11.4004	-0.149067	0	0.998233	11.4667	-0.14799
O60869	EDF1	16	7	1	0.910611	0.873564	0.796527	0.578532	0.598394	0.566488	0.318298	1	1.00465	0.939152	0.74528	0.619657	0.69226	0.762331	0.472671	1	0.954367	0.872782	0.782618	0.576078	0.567397	0.452505	0.284134	1	1.01522	0.993064	0.77942	0.568696	0.500206	0.515432	0.476196	16.7633	-0.0537979	0	0.894912		-0.0672391	0.591883	0.821174	14.7899	-0.0610098	0	0.954745	16.6047	-0.109273
O60870	KIN	13	7	1	0.967115	0.887473	0.717413	0.295933	0.112402	0.0805312	0.0613141	1	1.02146	0.948514	0.798367	0.335248	0.132592	0.13454	0.101199	1	0.996424	0.951336	0.752682	0.320316	0.147366	0.0836486	0.070935	1	1.07302	1.02687	0.820474	0.349936	0.159031	0.145298	0.0840659	10.2802	-0.160724	0.00353537	0.99035	10.6965	-0.184186	0.08362	0.996742	10.5502	-0.164624	0.0288003	0.998596	10.8808	-0.179914
O60879	DIAPH2	20	18	1	0.935883	0.913888	0.720264	0.334583	0.164873	0.133585	0.111303	1	1.0008	0.925426	0.726734	0.317479	0.108789	0.0679576	0.0577773	1	0.960955	0.97385	0.758726	0.371957	0.180649	0.1521	0.133643	1	1.02261	0.931337	0.743945	0.313327	0.117103	0.0720973	0.0496481	10.4423	-0.14933	0.0557787	0.990832	10.4048	-0.162042	0	0.99618	10.7498	-0.155056	0.0931258	0.997713	10.4801	-0.164835
O60884	DNAJA2	33	26	1	0.99783	0.982234	0.836272	0.479496	0.213931	0.079433	0.0297722	1	1.00621	0.995359	0.83925	0.475173	0.223532	0.0964787	0.0425769	1	1.00342	0.992795	0.82982	0.489123	0.214777	0.0876549	0.0389119	1	0.995825	0.950586	0.835118	0.4652	0.211233	0.102347	0.047009	11.6768	-0.145747	0	0.99768	11.699	-0.141247	0	0.998889	11.7057	-0.142356	0	0.997853	11.6093	-0.141089
O60885	BRD4	11	16	1	0.936138	1.00677	0.929474	0.675955	0.556553	0.388221	0.181659	1	0.981482	1.04578	0.933131	0.683708	0.666509	0.561237	0.3054	1	0.98048	1.02674	0.959164	0.760399	0.63363	0.376759	0.184608	1	1.01756	0.98077	0.939236	0.746053	0.631936	0.506852	0.319727	15.0311	-0.0796967	0	0.976225	17.4804	-0.0565855	0	0.941829	15.8623	-0.0868571	0	0.982327	17.1503	-0.0608476
O60888-2	CUTA	8	5	1	0.988033	0.959769	1.00301	0.770823	0.922759	0.837012	0.805666	1	1.09822	1.1721	1.15408	0.725675	0.874846	0.906337	0.855968	1	0.827474	1.03244	0.970941	0.951276	0.861653	0.7633	0.555888	1	1.01388	1.24344	1.03528	0.851683	0.845129	0.733608	0.644029		-0.207812	0.834063	0.763148		-0.0591106	0.84247	0.491418		-0.0531264	0	0.80525		-0.0335679
O60890	OPHN1	4	2	1	0.984988	1.062	0.905552	0.666415	0.704511	0.693198	0.618145	1	1.1026	1.1334	0.90337	0.523214	0.130646	0.0523558	0.0552708	1	0.968689	1.07096	0.927166	0.718272	0.622385	0.684294	0.666615	1	1.0011	1.00366	0.910406	0.490918	0.120208	0.0601858	0.0361876		-0.876251	0.670567	0.961112	11.9988	-0.183609	0.00399747	0.980152		-0.0975568	0.656802	0.960117	11.8482	-0.186076
O60906	SMPD2	4	3	1	0.955072	1.00044	0.881191	0.524854	0.334246	0.180028	0.103112	1	0.995952	0.993626	0.847177	0.495012	0.371929	0.230562	0.216127	1	1.03556	1.05335	0.870219	0.557219	0.335956	0.133195	0.0865902	1	0.982104	1.06359	0.908539	0.535475	0.276193	0.144919	0.0518706	12.4735	-0.114043	0	0.996162	12.2171	-0.11335	0.147306	0.996881	12.5408	-0.120615	0	0.993206	12.3802	-0.133993
O60907	TBL1X	15	14	1	0.960249	0.947153	0.872512	0.734511	0.588044	0.192496	0.0279799	1	1.0307	1.10538	1.03129	0.775437	0.707654	0.356679	0.0306216	1	0.978058	0.966376	0.91924	0.773436	0.607578	0.233312	0.025087	1	1.01328	1.05968	0.996937	0.78791	0.64898	0.319691	0.0445981	14.6759	-0.121023	0	0.949841	16.1761	-0.128381	0	0.943546	15.1384	-0.127596	0	0.966115	15.7055	-0.12093
O60909-3	B4GALT2	1		1	0.759044	1.08106	1.04108	0.47995	0.376057	0.225809	0.105531									1	0.941987	1.07377	1.15159	0.663462	0.459872	0.324639	0.149052									12.3202	-0.163843	0.167897	0.909962					14.199	-0.115284	0.12332	0.945113
O60911	CTSV	5	3	1	0.988864	1.6346	0.836836	0.718591	0.908968	0.95947	0.885542	1	0.957214	0.959648	0.915416	0.831513	1.06835	1.37488	1.41557	1	1.00359	0.996076	1.01128	0.862853	0.993786	0.909502	0.801293	1	0.955212	1.00077	0.999191	0.827908	0.964684	1.11901	1.18545		-0.401277	0.86188	0.17853		0.1414	1.41688	0.878902		-0.0163954	0	0.607254		0.287815
O60921	HUS1	11	9	1	0.986097	1.00072	0.907511	0.584922	0.494428	0.421349	0.257649	1	0.996703	1.00673	0.910948	0.57759	0.495169	0.515831	0.334315	1	1.05583	1.02143	0.881483	0.589197	0.490036	0.374025	0.225284	1	1.02939	1.0096	0.937943	0.603952	0.493135	0.437311	0.350948	14.3284	-0.0787309	0.142553	0.982161	14.0916	-0.10524	0.397307	0.971008	14.1841	-0.0761384	0	0.984925	14.0329	-0.105847
O60925	PFDN1	13	9	1	1.04098	1.06926	0.994739	0.924516	1.15345	1.43927	1.25109	1	1.01478	1.12698	1.0282	0.914066	1.25372	1.51798	1.67213	1	0.999005	1.02619	0.984848	0.924106	1.08086	1.10409	0.942518	1	1.04134	1.0303	1.01057	0.915053	1.14211	1.34621	1.32551		0.784145	1.34518	0.847743						0.0372943	1.01044	0.00665161		0.772687
O60927	PPP1R11	7	4	1	0.964385	1.05805	1.00456	0.752004	0.864671	0.955406	0.772205	1	1.05912	1.11961	1.04717	0.690121	0.978558	1.155	1.16686	1	1.11886	1.07163	0.992063	0.849762	0.879227	0.818295	0.741149	1	1.03557	1.10057	1.07516	0.762671	0.929739	1.07331	1.1258		-0.631704	0.836072	0.65299		0.27334	1.16686	0.283105		-0.0216378	0.581662	0.78885		0.197889
O60930	RNASEH1	6	3	1	0.979885	0.989236	0.825528	0.390092	0.16639	0.0751598	0.036643	1	0.940057	0.896798	0.727265	0.330846	0.0910515	0.0125385	0.0112612	1	1.02264	0.937624	0.784181	0.381985	0.157013	0.0828833	0.0424785	1	0.999992	0.989915	0.745685	0.359904	0.0945575	0.0370749	0.0113966	11.1707	-0.158555	0	0.999552	10.4025	-0.175155	0	0.986858	10.9485	-0.152226	0	0.996984	10.6172	-0.17142
O60931-2	CTNS	2		1	1.1509	1.0154	0.948949	0.61834	0.495342	0.389466	0.259607									1	0.977215	1.0745	0.887166	0.509992	0.474038	0.325598	0.229608									14.3757	-0.0862136	0.172737	0.960764					13.0229	-0.100251	0.196735	0.974276
O60934	NBN	14	13	1	0.979469	0.976065	0.874236	0.443466	0.218668	0.164906	0.127895	1	0.989331	1.03557	0.924237	0.463636	0.218521	0.123673	0.094992	1	1.01976	1.00523	0.894499	0.467991	0.239296	0.158374	0.122659	1	1.04313	1.04121	0.903359	0.492672	0.224836	0.140341	0.0774856	11.5571	-0.158903	0.105549	0.999053	11.8166	-0.170456	0.0773196	0.998532	11.7928	-0.154668	0.0969114	0.999525	11.9745	-0.150598
O60936-2	NOL3	7	10	1	1.00346	0.988479	0.975709	0.823965	1.01374	1.27985	1.09674	1	1.03882	1.02988	1.0022	0.891641	1.2235	1.4816	1.50481	1	0.999381	0.946976	1.00161	0.884139	1.12489	1.05662	0.912905	1	1.04047	0.979347	1.09779	0.958903	1.16341	1.27619	1.41288		0.458916	1.18829	0.580006		0.243999	1.49549	0.962059		-0.0370577	0.987856	0.0050123		0.0594185
O60941	DTNB	9	5	1	1.00457	0.959098	0.868173	0.404783	0.172309	0.10434	0.074544	1	1.012	1.07339	0.776807	0.439297	0.236499	0.167132	0.143772	1	1.00648	1.01207	0.861525	0.426064	0.183325	0.119799	0.07183	1	0.978192	1.03341	0.871237	0.43076	0.254755	0.139141	0.122572	11.3377	-0.169863	0.04839	0.99874	11.2796	-0.134896	0.0861359	0.993608	11.447	-0.159457	0.0419723	0.999659	11.5679	-0.152857
O60942	RNGTT	23	19	1	1.05536	1.0434	0.859493	0.418135	0.196765	0.152215	0.105903	1	1.00516	0.999728	0.836051	0.39726	0.175335	0.112363	0.0817787	1	1.04978	1.00772	0.803191	0.390079	0.191515	0.126831	0.0874141	1	1.04498	1.02813	0.862518	0.396674	0.180588	0.11327	0.0776907	11.3716	-0.164137	0.0892214	0.995738	11.2052	-0.161909	0.0485145	0.999948	11.0868	-0.151942	0.0496214	0.997864	11.2887	-0.170326
O75027-2	ABCB7	8	9	1	0.979549	0.954682	0.764214	0.300938	0.0895955	0.0275517	0.0106944	1	1.00645	1.02848	0.800512	0.355762	0.176856	0.123922	0.087049	1	1.02014	0.976207	0.743838	0.278228	0.0978286	0.0462542	0.0221984	1	0.953827	0.964303	0.789464	0.358184	0.160275	0.0949501	0.0724609	10.4906	-0.187401	0	0.997876	10.8787	-0.167392	0.0682209	0.999043	10.358	-0.184062	0	0.999469	10.8614	-0.159955
O75037	KIF21B	4	5	1	0.875158	0.926967	0.820988	0.493061	0.419507	0.265885	0.110427	1	1.0132	0.96588	0.705126	0.378771	0.208218	0.122366	0.0376157	1	1.05435	1.02303	0.974301	0.655647	0.491989	0.334489	0.144363	1	0.922568	0.850169	0.719942	0.397043	0.207291	0.138122	0.0631427	12.4661	-0.0939434	0	0.960139	10.6697	-0.133508	0	0.997771	14.4135	-0.0916151	0	0.984104	10.6833	-0.124173
O75044	SRGAP2	24	17	1	1.00179	0.992624	0.842743	0.401651	0.155341	0.110651	0.0834681	1	1.04442	1.09619	0.908006	0.460865	0.169257	0.13856	0.102346	1	1.00827	1.00895	0.871824	0.416374	0.169104	0.103291	0.0802512	1	1.01938	1.07344	0.889867	0.419204	0.1631	0.10675	0.0764233	11.2149	-0.167415	0.0497429	0.999616	11.6874	-0.180832	0.0851614	0.991064	11.3969	-0.170719	0.0504604	0.999829	11.4544	-0.179464
O75052	NOS1AP	5	3	1	1.04313	5.30594	0.894653	0.547181	0.61538	0.470937	0.254685	1	0.956265	1.01362	0.900283	0.667195	0.762236	0.667897	0.398874	1	0.98919	1.09927	1.07248	0.798487	0.729296	0.618596	0.270943	1	1.03183	1.05211	0.950561	0.748098	0.684132	0.606086	0.432716	13.6606	-0.120851	0.397905	0.0298225		-0.0419153	0	0.857971	18.2228	-0.0710048	0	0.914127	19.8627	-0.0468617
O75054-2	IGSF3	9	10	1	0.939501	0.970298	0.893415	0.694533	0.650959	0.323407	0.103085	1	1.0199	1.05125	0.921708	0.702781	0.688357	0.397898	0.057372	1	1.01163	1.00318	1.02267	0.819458	0.696598	0.322872	0.109908	1	1.02922	1.0752	0.980975	0.781216	0.710376	0.389811	0.111704	15.1543	-0.0908577	0	0.938195	15.6812	-0.0941689	0	0.922384	16.1699	-0.121195	0	0.979407	16.3332	-0.105798
O75061-2	DNAJC6	8	4	1	0.949113	1.03442	0.94571	0.630992	0.384339	0.24207	0.129449	1	0.993672	1.11166	1.02807	0.624331	0.325456	0.192106	0.102009	1	1.01093	1.03295	0.990721	0.608296	0.361677	0.222648	0.119155	1	1.05801	1.00903	1.07708	0.732105	0.379355	0.200202	0.10829	13.4914	-0.107072	0.00552414	0.994331	13.0792	-0.147042	0.0848715	0.984489	13.1982	-0.125296	0.0701437	0.994233	13.8451	-0.142563
O75063	FAM20B	6	6	1	1.11735	1.16133	0.970857	0.572021	0.247469	0.0854907	0.0378506	1	1.0304	1.06167	0.884309	0.478304	0.215047	0.079194	0.0457883	1	1.02112	0.987582	0.861539	0.4796	0.194679	0.0671155	0.0391498	1	1.0613	1.04369	0.925072	0.496946	0.222553	0.0918402	0.0479578	12.5574	-0.160174	0	0.973817	11.8509	-0.151949	0	0.996024	11.7346	-0.153946	0	0.998534	12.0633	-0.155419
O75064	DENND4B	4	2	1	0.822292	1.1629	0.717027	0.268786	0.100353	0.0536653	0.0369061	1	1.04417	1.0755	0.930358	0.472151	0.128692	0.0864426	0.0423991	1	1.03196	1.11272	0.896382	0.33411	0.14772	0.0708305	0.054167	1	1.08603	1.11505	0.9914	0.538721	0.163679	0.0839976	0.0372322	10.2262	-0.193198	0.0201169	0.958848	11.8026	-0.196811	0.0296138	0.994335	11.0882	-0.211945	0.0540952	0.990523	12.2178	-0.209845
O75071	EFCAB14	5	7	1	1.01961	1.04717	0.903521	0.763776	0.845926	0.970585	0.721517	1	0.955228	1.13739	0.994228	0.742869	0.853932	0.975489	0.885846	1	0.991337	1.06243	0.955569	0.810287	0.943552	0.857222	0.670823	1	0.970125	1.09856	1.01923	0.804782	0.813185	0.81933	0.764653		-0.470435	0.825451	0.62663		-0.446018	0.864534	0.494778		-0.0214778	0	0.704628		-0.278535
O75072	FKTN		1									1	1.08179	1.02952	0.799583	0.51266	0.252261	0.216707	0.144892									1	0.972035	1.10647	0.751261	0.376644	0.183125	0.151929	0.176668					11.8676	-0.116648	0.0569437	0.990072					10.6791	-0.166538
O75074	LRP3	5	5	1	1.32371	1.31572	1.25138	1.06631	1.25779	1.40163	1.19946	1	1.00701	1.0528	0.872093	0.751697	1.04971	1.29266	1.24091	1	1.07746	1.06953	1.04506	0.857878	0.913057	0.900948	0.70328	1	1.19287	1.1162	1.04353	0.972942	1.09152	1.3186	1.32275			1.5	0.462353		0.66608	1.26678	0.623162		-0.0256242	0	0.721718		0.167479
O75078	ADAM11		1									1	1.10677	1.13739	0.809151	0.606099	0.349015	0.426323	0.292525									1	1.2408	1.22289	1.02988	0.665631	0.427618	0.428539	0.333762					12.9997	-0.101013	0.274004	0.944776					13.3593	-0.172615
O75083	WDR1	83	57	1	1.04838	1.0874	0.94003	0.511772	0.171806	0.0564824	0.0374616	1	0.988223	1.01014	0.875216	0.513808	0.168446	0.0443136	0.0383825	1	1.0034	1.02279	0.912883	0.493551	0.157666	0.0622224	0.0352753	1	1.01163	0.987591	0.913987	0.540941	0.172172	0.0623742	0.0363296	12.0683	-0.179388	0.00215729	0.993317	11.9109	-0.166443	0	0.997229	11.9056	-0.174674	0	0.999368	12.159	-0.1726
O75084	FZD7		3									1	1.06041	0.956833	0.912292	0.568908	0.30115	0.134786	0.0244455									1	0.943008	0.918498	0.873912	0.526773	0.280969	0.135851	0.0608467					12.5948	-0.135817	0	0.992434					12.2201	-0.128432
O75093	SLIT1	6	3	1	0.909753	0.909042	0.907429	0.724375	0.888057	0.929558	0.552545	1	0.946637	0.993344	0.915393	0.729306	0.937613	1.00243	0.768643	1	1.01767	1.06185	1.10999	0.997166	1.11453	0.966952	0.600683	1	0.898907	0.952978	0.936316	0.892825	1.06313	1.08798	0.697006		-0.0234953	0.2071	0.35742		-0.406512	0.8595	0.302611
O75096	LRP4	2		1	1.04663	1.08555	1.01934	0.487244	0.291237	0.17003	0.0641747									1	1.01908	1.16467	0.948891	0.559977	0.27919	0.12892	0.0688687									12.2107	-0.171894	0.100719	0.98166					12.5715	-0.142516	0.0145748	0.978991
O75110	ATP9A	12	10	1	0.980726	0.986504	0.816945	0.423303	0.238735	0.167571	0.0801977	1	0.938722	0.908779	0.757405	0.347507	0.172288	0.095265	0.0539719	1	1.10239	1.02423	0.783938	0.364183	0.234911	0.14373	0.0661119	1	0.953533	0.947345	0.747288	0.348212	0.140275	0.0959409	0.0525777	11.4293	-0.132591	0.032244	0.998294	10.7174	-0.146192	0	0.991122	11.007	-0.143586	0.0427135	0.988863	10.6521	-0.151705
O75113	N4BP1	14	19	1	0.965073	1.04468	0.909451	0.612774	0.341804	0.259777	0.213193	1	1.02737	1.06946	0.956442	0.641519	0.377298	0.225199	0.173112	1	1.06152	1.06191	0.96552	0.62685	0.368221	0.249709	0.195872	1	1.01124	1.02383	0.907115	0.623198	0.352254	0.216427	0.132383	12.9842	-0.120006	0.156561	0.995715	13.3697	-0.120274	0.101422	0.993886	13.2027	-0.128112	0.159052	0.991612	13.2001	-0.108565
O75116	ROCK2	90	73	1	1.00248	1.00638	0.931157	0.609791	0.177069	0.0651243	0.0420374	1	1.03871	1.02115	0.935108	0.607067	0.191653	0.0640616	0.0417948	1	1.01916	1.03696	0.962653	0.628804	0.178816	0.0716085	0.046731	1	1.0193	1.0242	0.965747	0.657929	0.20581	0.0751757	0.047413	12.5318	-0.184744	0.00467799	0.998518	12.5509	-0.177751	0	0.997692	12.6214	-0.203435	0.0276363	0.998468	12.8126	-0.192609
O75121	MFAP3L		1									1	0.863589	0.837685	0.946329	0.595725	0.424146	0.413119	0.187224									1	0.873242	0.982675	0.947151	0.649357	0.526356	0.43474	0.21064					14.0611	-0.0800761	0	0.899691					15.0753	-0.0745415
O75128-2	COBL	3	1	1	1.01341	1.02275	0.841247	0.557589	0.428885	0.393497	0.295902	1	1.03558	0.98554	0.661174	0.418406	0.314731	0.306636	0	1	1.04531	1.03926	0.959616	0.607398	0.496782	0.360115	0.28582	1	1.2027	0.825453	1.18298	0.464377	0	0	0.00079848	13.1392	-0.0968608	0.267617	0.994569	10.9927	-0.105908	0	0.962541	14.03	-0.0974148	0.245173	0.985262	11.9755	-1.46157
O75131	CPNE3	59	43	1	1.04652	1.01259	0.975228	0.746624	0.236035	0.0563767	0.0402319	1	1.01492	0.981553	0.932791	0.668517	0.239616	0.0491662	0.0316421	1	1.04314	1.05209	0.989195	0.7669	0.238343	0.0719232	0.0431426	1	1.07695	0.902585	1.01222	0.802747	0.275216	0.065622	0.0342674	13.2495	-0.202408	0.0104292	0.997973	12.9267	-0.178564	0	0.997309	13.324	-0.208878	0.0238867	0.996788	13.5992	-0.202419
O75132	ZBED4	1		1	0.935041	0.957776	0.73123	0.28954	0.139198	0.0800924	0.0733115									1	0.940558	1.01594	0.749696	0.324665	0.133065	0.0968371	0.0398174									10.3328	-0.175031	0.0404552	0.995501					10.5766	-0.164641	0.0140656	0.996409
O75140	DEPDC5	2	5	1	0.924012	0.994571	0.797105	0.394901	0.119738	0.0576499	0.0248646	1	1.00459	1.0153	0.844344	0.370694	0.106425	0.0424258	0.0197516	1	1.12507	1.13218	0.891589	0.459692	0.149559	0.0649696	0.0385097	1	1.02211	0.984297	0.841955	0.365985	0.118436	0.0457074	0.0374492	11.0063	-0.165955	0	0.993982	11.0824	-0.184819	0	0.999431	11.683	-0.171949	0	0.979307	11.066	-0.179428
O75143-5	ATG13	6	9	1	1.00927	1.02625	0.898204	0.566484	0.333884	0.266448	0.190452	1	1.02471	1.10874	0.941231	0.616357	0.537974	0.477213	0.40261	1	1.01673	1.03142	0.953599	0.56822	0.360575	0.22036	0.154175	1	1.02482	1.04874	0.972615	0.616633	0.468415	0.417589	0.371024	12.68	-0.119367	0.146191	0.998271	14.9502	-0.105127	0.427744	0.969473	12.8721	-0.124953	0.108575	0.995742	13.6006	-0.131904
O75144-2	ICOSLG	4	2	1	0.213169	0.285441	0.20194	0.151273	0.19969	0.243881	0.203874	1	0.902816	0.924171	0.86079	0.806713	1.09785	1.30314	1.32423	1	1.1663	1.10009	1.10222	0.892347	1.09332	1.06638	0.854006	1	1.10266	1.05289	1.01062	0.920351	1.2939	1.35322	1.32324	0.347256		0	0.981896		0.1335	1.31828	0.735446		0	0	0.140279		0.704182
O75145	PPFIA3	5	8	1	1.06064	1.17285	0.862517	0.483928	0.283086	0.228982	0.145462	1	1.01599	0.932311	0.803124	0.406435	0.177825	0.092824	0.0774139	1	0.975661	1.05948	0.891189	0.47456	0.261891	0.186356	0.140768	1	0.995225	0.968801	0.825422	0.391933	0.171106	0.129834	0.0702464	11.9081	-0.136551	0.130753	0.970145	11.1624	-0.143954	0.00162947	0.996456	11.8509	-0.149669	0.120957	0.995821	11.148	-0.158194
O75146	HIP1R	52	39	1	1.05772	1.27686	0.911567	0.488995	0.208394	0.101199	0.0752814	1	0.992494	1.00368	0.85297	0.443032	0.181912	0.0793723	0.0594198	1	1.03049	1.04384	0.880347	0.449646	0.194673	0.101248	0.0710924	1	0.983842	1.00219	0.855027	0.444459	0.17987	0.0854964	0.0637865	11.939	-0.163242	0.0397415	0.949766	11.5256	-0.152502	0	0.999738	11.643	-0.158563	0.0309428	0.997752	11.534	-0.152733
O75150	RNF40	51	44	1	0.976294	1.00889	0.922024	0.762889	0.837735	0.58855	0.0586443	1	0.994375	1.01464	0.929776	0.739772	0.841783	0.712364	0.0369127	1	0.988966	1.00904	0.944074	0.805383	0.837596	0.530723	0.0644212	1	1.00286	1.01966	0.951037	0.808314	0.853771	0.667115	0.073311	18.1888	-0.202297	0	0.883576	18.6016	-0.360869	0	0.867166	17.7848	-0.16729	0	0.928034	18.5817	-0.268067
O75151	PHF2		3									1	0.92252	0.79596	0.763217	0.309107	0.222257	0.135798	0.126908									1	0.893745	0.923927	0.678543	0.374247	0.207314	0.169798	0.116096					10.5252	-0.121957	0	0.952202					10.4973	-0.118557
O75152	ZC3H11A	12	7	1	0.981583	0.965801	0.753872	0.326189	0.141422	0.114935	0.0764214	1	0.963721	0.96417	0.758155	0.333771	0.15951	0.10477	0.0852225	1	0.992286	0.969627	0.749616	0.312402	0.163036	0.105088	0.0738801	1	0.960259	0.920443	0.749855	0.294075	0.141083	0.113633	0.0560035	10.5526	-0.167534	0.0491769	0.998782	10.6187	-0.162866	0.0480959	0.9982	10.5108	-0.167192	0.0494397	0.999373	10.4246	-0.173201
O75153	CLUH	78	64	1	1.05258	1.0453	0.969785	0.70918	0.33833	0.06689	0.0354854	1	1.01727	1.0394	0.937886	0.700592	0.423916	0.104359	0.0467054	1	1.01444	1.00933	0.930191	0.680748	0.326619	0.0782848	0.0320759	1	1.01875	1.03111	0.942206	0.714551	0.415252	0.116573	0.0449693	13.4246	-0.161034	0	0.993342	13.6952	-0.137415	0	0.989102	13.2324	-0.153652	0	0.995571	13.7534	-0.138847
O75157	TSC22D2	4	3	1	0.917243	0.979506	0.954991	0.697434	0.532872	0.295832	0.117312	1	1.0088	1.00795	1.00011	0.700373	0.554745	0.310271	0.124422	1	0.98339	1.05375	1.03942	0.793788	0.613628	0.285309	0.107946	1	1.00473	1.06245	1.0353	0.83526	0.636211	0.302584	0.136757	14.6096	-0.0977026	0	0.977642	14.8546	-0.0973808	0	0.983174	15.4971	-0.114356	0	0.98197	15.8462	-0.114798
O75161	NPHP4	1	2	1	0.895998	0.807582	0.640474	0.30474	0.160061	0.0838308	0.0701167	1	1.12436	1.25822	0.874747	0.558987	0.449918	0.435536	0.212675	1	0.897841	0.944009	0.804605	0.372111	0.141153	0.105024	0.0718015	1	0.926155	1.02597	1.04031	0.608082	0.470733	0.282917	0.319681	9.6374	-0.13329	0	0.96879	13.4523	-0.0958543	0.22564	0.894777	10.9453	-0.163273	0.0329135	0.988247	13.2865	-0.142497
O75164	KDM4A	17	10	1	1.00215	1.01807	0.918733	0.512413	0.232172	0.141676	0.0930069	1	1.00813	1.06811	0.956773	0.526992	0.246516	0.142878	0.104149	1	1.01217	0.99461	0.882679	0.50645	0.22689	0.119688	0.0769114	1	1.03522	1.08357	0.972494	0.582013	0.269709	0.142985	0.0797616	12.1054	-0.153709	0.0604307	0.999617	12.2448	-0.16599	0.0874072	0.995738	12.0179	-0.140249	0.00789697	0.999823	12.65	-0.153276
O75165	DNAJC13	54	48	1	1.02026	1.01092	0.76094	0.289715	0.105403	0.0843578	0.0668674	1	0.991899	0.927856	0.714517	0.272407	0.086286	0.0640191	0.0497271	1	1.00218	0.958487	0.738397	0.266978	0.116637	0.0794222	0.059679	1	0.99281	0.947613	0.712147	0.252244	0.0892318	0.0652629	0.049529	10.4158	-0.192176	0.0452786	0.999279	10.189	-0.180014	0.0103541	0.996402	10.2656	-0.190663	0.0417111	0.998983	10.1146	-0.191556
O75167-4	PHACTR2	4	2	1	1.0267	1.10123	1.00216	0.779994	0.639994	0.301285	0.102303	1	0.97365	0.986968	0.984665	0.744124	0.845101	0.279468	0.0988898	1	1.06065	1.05148	0.990499	0.795899	0.629799	0.261071	0.108548	1	0.936929	0.898155	1.06461	0.777479	0.791651	0.34938	0.16226	15.6092	-0.1111	0	0.969859	16.7421	-0.198493	0.0345495	0.926195	15.5043	-0.117232	0	0.979225	16.7784	-0.118614
O75170-3	PPP6R2		26									1	1.00851	1.01199	0.842651	0.515834	0.309958	0.173903	0.122075									1	1.01054	0.993611	0.864417	0.525612	0.300231	0.162489	0.110436					12.2291	-0.112451	0	0.999277					12.3	-0.117289
O75170-5	PPP6R2	17		1	1.07661	1.07057	0.894686	0.529796	0.29858	0.174145	0.0936763									1	1.02951	1.0834	0.886812	0.544804	0.296225	0.149695	0.10261									12.4064	-0.123836	0.0161558	0.990049					12.4448	-0.123689	0.00449563	0.992824
O75175	CNOT3	15	16	1	0.956604	0.908987	0.759783	0.461343	0.327579	0.311188	0.238681	1	1.013	0.961152	0.777747	0.438898	0.27439	0.235738	0.188463	1	0.975845	0.955561	0.814259	0.480569	0.37393	0.295942	0.228466	1	1.03546	0.982292	0.813821	0.429883	0.261149	0.201585	0.172219	11.7104	-0.0968466	0.124943	0.989205	11.3216	-0.126285	0.14222	0.998628	12.1121	-0.105843	0.171957	0.995153	11.3462	-0.141051
O75177	SS18L1	2		1	1.03128	0.959595	0.848066	0.542492	0.626978	0.827969	0.570416									1	0.913359	0.987525	0.821833	0.590773	0.59751	0.606549	0.488192										-1.16342	0.641964	0.80647						-0.106162	0.547511	0.945812
O75179	ANKRD17	33	24	1	1.03472	1.03841	0.888917	0.495054	0.273477	0.160607	0.107493	1	0.988152	0.995086	0.865182	0.492047	0.287916	0.179287	0.104724	1	1.00528	1.00036	0.830116	0.466917	0.264217	0.138358	0.115835	1	1.01308	1.01022	0.868507	0.485215	0.294043	0.165532	0.118055	12.0647	-0.135714	0.0574344	0.997097	12.0764	-0.12276	0.0299775	0.999065	11.7336	-0.126849	0.0269761	0.999493	12.0286	-0.126721
O75182	SIN3B	8	11	1	1.03357	1.09113	0.908383	0.475244	0.225232	0.105823	0.0741549	1	1.004	1.05443	0.868592	0.533402	0.296027	0.214692	0.131755	1	1.03664	0.99165	0.865576	0.478154	0.210725	0.106155	0.0633389	1	0.983506	1.05926	0.889337	0.512721	0.296965	0.208468	0.131617	11.8956	-0.156544	0.0366573	0.992565	12.3353	-0.119901	0.0626723	0.996167	11.7933	-0.143024	0	0.998884	12.226	-0.129377
O75185-2	ATP2C2		1									1	0.913272	0.99818	0.737296	0.493283	0.323668	0.258912	0.133787									1	0.886212	0.814041	0.71291	0.328111	0.210656	0.324241	0					11.8308	-0.0975069	0	0.986847					10.3128	-0.112399
O75190-2	DNAJB6		1									1	1.03947	0.973266	0.85897	0.525482	0.215547	0.0303452	0									1	1.1137	1.10611	0.921064	0.526445	0.236179	0.0940203	0.027475					11.9885	-0.160445	0	0.991753					12.2284	-0.153395
O75190	DNAJB6	6	5	1	1.01292	1.16562	0.818118	0.443087	0.222554	0.103345	0.066681	1	0.956815	0.934258	0.836833	0.430033	0.251396	0.138862	0.117686	1	0.997849	0.968411	0.827914	0.417053	0.229555	0.145042	0.0569159	1	1.00004	1.05914	0.809574	0.459756	0.214408	0.130393	0.0868498	11.5227	-0.139454	0	0.978655	11.4925	-0.137371	0.058427	0.993985	11.439	-0.134534	0.00373723	0.997977	11.5379	-0.133326
O75191	XYLB	2	5	1	0.856429	0.981268	0.916949	0.627699	0.411433	0.325852	0.17526	1	1.00027	1.10333	0.959407	0.619364	0.350331	0.226174	0.131985	1	1.0138	1.04402	0.963432	0.702062	0.503526	0.3195	0.204294	1	1.00456	1.06824	0.973245	0.675956	0.320024	0.178083	0.130496	13.7993	-0.0897107	0.00353064	0.966769	13.1768	-0.123309	0.0741826	0.988644	14.7595	-0.0880371	0	0.994779	13.2514	-0.146819
O75197	LRP5	7	3	1	1.11779	1.05587	0.872222	0.509835	0.282896	0.224674	0.134775	1	1.07502	1.23895	0.824979	0.582178	0.247767	0.0794246	0.117385	1	0.992114	1.03756	0.925856	0.518692	0.31401	0.196062	0.133011	1	1.00575	1.27032	1.02584	0.439115	0.249754	0.0863665	0.0641	12.1294	-0.128386	0.09802	0.983833	12.2751	-0.131426	0	0.948278	12.358	-0.135284	0.102262	0.996601	11.8636	-0.211155
O75204	TMEM127	1	1	1	1.21554	1.15599	0.963406	0.570914	0.327365	0.206345	0.134858	1	1.09625	1.05303	0.898049	0.491806	0.173444	0.0892616	0.0567575	1	1.13239	0.998193	1.04815	0.498737	0.276719	0.194347	0.0517747	1	0.91629	1.05911	0.76639	0.403273	0.17452	0.140982	0.0769501	12.7465	-0.137377	0.108648	0.945858	11.8762	-0.162974	0.0116269	0.991295	12.2266	-0.185974	0.115096	0.972292	11.0153	-0.14409
O75208	COQ9	14	12	1	1.00528	1.00494	0.97656	0.843479	1.01578	1.09267	0.569769	1	0.982742	1.07382	0.947835	0.81773	1.13393	1.21124	0.621741	1	0.997647	1.05589	1.02697	0.892701	1.06471	0.915066	0.449678	1	1.00229	1.00163	0.95859	0.897125	1.0472	1.09935	0.629249		0	0	0.820285		-0.116146	0.94616	0.0362049	18.7233	-0.765331	0.449676	0.931384		0
O75223	GGCT	26	17	1	0.966121	1.23037	0.931911	0.850992	1.13423	1.38694	1.23913	1	0.959123	1.02853	0.924697	0.845848	1.16233	1.45412	1.47466	1	1.02624	1.07055	1.02634	0.951225	1.26635	1.22367	1.09315	1	1.0032	1.065	1.00703	0.941375	1.15771	1.34538	1.37834		0.734586	1.31304	0.612852		0.212259	1.46859	0.919758		0.0964681	1.19356	0.672574		0.126515
O75251	NDUFS7	4	6	1	0.979431	0.901064	0.749892	0.343683	0.086675	0.00581364	0.00446298	1	0.977136	0.944699	0.748523	0.354861	0.106247	0.0137274	0.00756108	1	0.980454	0.909712	0.753375	0.352072	0.0981014	0.0304474	0.0125868	1	1.00085	0.988063	0.812622	0.375446	0.11747	0.034064	0.0142643	10.5437	-0.179069	0	0.989234	10.6059	-0.172904	0	0.994155	10.6068	-0.172115	0	0.991771	10.9838	-0.176165
O75298	RTN2	3		1	1.01879	0.989662	0.988828	0.700554	0.562133	0.306296	0.126155									1	0.994639	1.0019	0.906537	0.747598	0.585556	0.302838	0.126379									14.8664	-0.0968145	0	0.982623					15.0968	-0.0970979	0	0.980277
O75306	NDUFS2	40	36	1	1.03528	1.10159	0.870314	0.501335	0.269605	0.146273	0.0806476	1	1.01185	1.00587	0.829188	0.470108	0.231535	0.107082	0.0496318	1	1.01706	1.00436	0.844612	0.484731	0.249422	0.138598	0.0770274	1	1.01822	0.967087	0.838503	0.455241	0.211038	0.109091	0.0698489	12.0997	-0.128937	0.00482498	0.989962	11.6633	-0.137001	0	0.998872	11.8631	-0.128782	0	0.999558	11.5904	-0.138827
O75312	ZNF259	28	28	1	0.984764	0.996132	0.946749	0.84509	1.03399	1.18565	0.930188	1	1.00973	1.02946	0.9409	0.811981	1.03765	1.20112	1.09488	1	1.01021	1.04666	1.00264	0.895501	1.0915	1.02017	0.785052	1	1.00973	1.05702	0.98023	0.887118	0.99753	1.08429	0.995021		-0.0285074	0.988333	-0.000808666			1.01933	0.00407269		0	0	0.664016		-0.0351892
O75317	USP12	6	1	1	1.21213	1.28864	1.06183	0.57222	0.264814	0.113794	0.0613945	1	1.16739	1.06426	0.898124	0.514511	0.145927	0.0967118	0	1	0.997644	1.06895	0.867717	0.438277	0.232074	0.0844792	0.0399457	1	0.989763	1.04438	0.871188	0.387551	0.147326	0.0884349	0.0150258	12.6043	-0.179452	0.0610231	0.921771	11.9648	-0.172741	0	0.977584	11.6509	-0.148273	0	0.994732	11.2968	-0.174171
O75319	DUSP11	4	3	1	0.961233	1.05973	0.817989	0.348035	0.147294	0.0740842	0.0522051	1	0.981258	1.03424	0.836052	0.357442	0.235687	0.157974	0.116294	1	0.957843	0.958514	0.80271	0.301514	0.133775	0.0694	0.0350588	1	0.994611	1.04267	0.819217	0.442659	0.240923	0.126017	0.0721156	10.9245	-0.174953	0.0254383	0.996035	11.0127	-0.173614	0.122192	0.996838	10.6722	-0.184827	0.0224478	0.997224	11.5554	-0.131898
O75323	GBAS	8	7	1	0.969739	0.980612	0.813829	0.351934	0.146039	0.0754327	0.0556195	1	1.02589	1.04142	0.907128	0.432322	0.130651	0.0538651	0.0452282	1	0.99612	0.996023	0.85732	0.408634	0.155261	0.0959325	0.0587406	1	1.01644	0.907665	0.891825	0.446336	0.137515	0.0715318	0.0420483	10.9201	-0.170448	0.021412	0.999089	11.5669	-0.188815	0.0132756	0.998186	11.3228	-0.167042	0.0265785	0.99985	11.5934	-0.173953
O75325	LRRN2		1									1	0.837673	0.866967	0.684484	0.238694	0.152955	0	0.133269									1	0.874523	0.932427	0.625543	0.314952	0.181866	0.0890593	0					9.9478	-0.178416	0.0402813	0.951326					9.94973	-0.144797
O75326	SEMA7A	3	1	1	1.07902	1.47827	1.03074	0.687282	0.465877	0.317059	0.210339	1	1.0596	0.940642	0.895059	0.626887	0.447927	0.296986	0.147007	1	0.935073	1.10257	1.06709	0.720121	0.501939	0.233769	0.156229	1	1.14505	1.14594	0.97434	0.750198	0.463817	0.235705	0.168293	14.2583	-0.109171	0.157441	0.817839	13.747	-0.0910172	0	0.987367	14.5824	-0.109352	0.00765751	0.970948	14.4411	-0.110047
O75330-3	HMMR	33	22	1	1.01772	0.978439	0.816439	0.325991	0.116788	0.0879882	0.0610863	1	0.976637	1.01393	0.816935	0.281946	0.0782391	0.0475067	0.0444682	1	1.00234	1.00815	0.844586	0.314664	0.120737	0.0891636	0.0613243	1	1.00524	0.990604	0.829166	0.289971	0.0773521	0.0589373	0.0450049	10.7695	-0.188814	0.0420608	0.999282	10.6014	-0.211449	0.0222798	0.999257	10.8131	-0.204205	0.0545489	0.999848	10.6661	-0.212684
O75340	PDCD6	18	23	1	1.10681	1.0532	0.889535	0.728794	0.893249	1.03971	0.915438	1	1.02652	1.03603	1.00994	0.815877	0.95507	1.21015	1.4426	1	1.02325	1.09549	0.934609	0.767909	0.847114	0.849508	0.767174	1	0.940016	1.03565	0.909157	0.772959	0.835917	1.0041	1.05107		-0.346643	0.893345	0.384233		0.736675	1.4426	0.846263		-0.485536	0.807926	0.844575		-0.502027
O75342	ALOX12B	2		1	0.684612	1.80646	0.560551	0.456037	0.617259	0.163495	0.281313									1	0.89565	0.956106	0.956843	0.727072	0.708514	0.768355	0.258089									9.28255	-0.348935	0.378236	0.533996					19.2323	-0.0522111	0	0.73073
O75347	TBCA	21	19	1	0.936961	0.943927	0.866438	0.796594	0.976273	1.20084	1.07208	1	0.961652	0.964892	0.914244	0.789574	1.11525	1.41787	1.42678	1	0.951206	1.04613	0.971977	0.910948	1.1387	1.11991	0.994894	1	0.990873	1.01898	0.98273	0.886041	1.1061	1.37948	1.25019						0.229191	1.42426	0.857247		0.0191279	1.07976	0.312881		0.815249
O75348	ATP6V1G1	4	4	1	1.04751	1.02682	0.919288	0.753794	0.554085	0.398585	0.260641	1	0.9329	0.959072	0.856435	0.669197	0.507551	0.449554	0.345986	1	0.987546	1.02055	0.906389	0.747321	0.523918	0.346971	0.226855	1	0.966161	0.922726	0.848132	0.654298	0.536931	0.427407	0.322434	15.6984	-0.0745926	0	0.993364	15.6521	-0.0606805	0	0.987155	15.1374	-0.0818675	0	0.996593	15.4156	-0.0616808
O75351	VPS4B	33	36	1	0.963061	0.989881	0.850821	0.513714	0.230735	0.0711497	0.0346124	1	0.947539	0.993868	0.905024	0.564157	0.289335	0.122356	0.0633941	1	0.994846	0.993328	0.904144	0.571033	0.246385	0.0869779	0.0488708	1	0.995683	1.0033	0.894873	0.614641	0.302202	0.124914	0.062535	11.9285	-0.145405	0	0.995658	12.524	-0.133767	0	0.996707	12.4278	-0.148557	0	0.998808	12.8012	-0.133114
O75352	MPDU1	2	5	1	1.40347	1.34147	1.13793	0.852466	0.505686	0.315823	0.180272	1	1.04664	1.0592	0.871938	0.418504	0.220878	0.120064	0.0709085	1	0.976776	0.969441	0.780858	0.471119	0.345953	0.212048	0.142269	1	1.00381	1.01614	0.850872	0.482122	0.263303	0.144952	0.0714054	15.1389	-0.125745	0.128824	0.799555	11.5061	-0.156792	0.0483647	0.994696	11.9015	-0.100701	0	0.997196	11.9129	-0.127694
O75354	ENTPD6	8	5	1	1.03148	1.06385	0.850489	0.434995	0.242268	0.146426	0.0850295	1	0.987879	0.990164	0.845719	0.432426	0.20363	0.095103	0.0505631	1	1.02766	0.976474	0.831207	0.455328	0.231974	0.136274	0.0869151	1	1.03255	0.934423	0.808993	0.417856	0.176034	0.103369	0.0442452	11.5763	-0.142893	0.0503357	0.994805	11.4952	-0.146786	0	0.999689	11.62	-0.131504	0.00947963	0.999071	11.2335	-0.145931
O75356	ENTPD5	2	5	1	1.00934	0.921847	0.772907	0.380719	0.124228	0.0556594	0.0282126	1	0.941648	1.02647	0.854194	0.52337	0.253202	0.132211	0.0908655	1	1.04944	0.925272	0.792941	0.359103	0.127313	0.0541752	0.047325	1	0.938381	0.989512	0.867438	0.529059	0.276023	0.166751	0.0919002	10.8355	-0.161479	0	0.994402	12.0945	-0.128013	0	0.995753	10.8512	-0.165438	0	0.994241	12.2556	-0.121627
O75362	ZNF217	12	8	1	1.02435	1.10606	0.919978	0.513684	0.260963	0.188941	0.12319	1	1.02227	1.11057	0.940571	0.495132	0.29872	0.189847	0.175824	1	1.03104	1.05806	0.870099	0.483883	0.272596	0.149589	0.101203	1	1.0286	1.033	0.884326	0.467519	0.269188	0.17411	0.134029	12.1512	-0.150072	0.106876	0.989454	12.0796	-0.161188	0.16457	0.987374	11.9717	-0.132407	0.0388505	0.995557	11.829	-0.145424
O75365	PTP4A3	1	1	1	0.964821	0.905284	0.763086	0.430502	0.169743	0.189324	0.0976558	1	1.02478	0.999092	0.717986	0.412835	0.254842	0.304756	0.526054	1	0.925107	0.966507	0.762408	0.455607	0.120179	0.252586	0.094954	1	0.78118	1.00866	0.841555	0.409801	0.230128	0.221351	0.218392	11.0974	-0.124106	0.00633671	0.987289	10.1016	-0.247502	0.368167	0.940845	11.1141	-0.135418	0.0633322	0.971063	11.1416	-0.173959
O75367	H2AFY	10	9	1	0.962255	1.91959	0.741575	0.270965	0.187272	0.11206	0.0901154	1	1.00255	0.969264	0.749062	0.250068	0.0792744	0.0411292	0.0173182	1	0.985037	0.949375	0.737223	0.298942	0.164729	0.120927	0.0921849	1	0.970509	0.919213	0.690301	0.232168	0.090598	0.0578451	0.0496248	10.2244	-0.223399	0.114845	0.69525	10.2779	-0.198403	0	0.999488	10.3763	-0.173465	0.0742976	0.998062	9.96877	-0.19211
O75368	SH3BGRL	14	7	1	0.9853	1.22505	0.940815	0.847919	1.13493	1.3858	1.21665	1	0.993026	1.06059	0.938642	0.778996	1.0602	1.39038	1.30225	1	1.06894	1.06824	1.04237	0.95398	1.25073	1.21958	1.05335	1	0.942713	1.03539	0.927383	0.834342	1.00983	1.14206	1.16085		0.681157	1.30122	0.589593		0.837045	1.34632	0.776477		0.0809698	1.17539	0.468423		0.0632382
O75369-8	FLNB		203									1	0.987933	1.02117	0.922852	0.718542	0.501976	0.161143	0.0481472									1	1.0131	1.01497	0.945527	0.761913	0.497083	0.161642	0.060487					14.171	-0.124371	0	0.982363					14.401	-0.131095
O75369	FLNB	235	1	1	1.00161	1.05603	0.928049	0.709114	0.44437	0.123095	0.0527729	1	0.937888	1.1108	1.18725	0.882557	0.255268	0.108898	0	1	1.01386	1.02945	0.956508	0.742288	0.448889	0.130025	0.0587505	1	0.970068	1.14221	1.01521	1.0108	0.341697	0.139111	0	13.8332	-0.132283	0	0.986877	13.8023	-0.243419	0.0261673	0.966219	14.057	-0.136775	0	0.992423	14.4654	-0.314013
O75376	NCOR1		2									1	1.04514	0.969129	0.893621	0.691187	0.45346	0.193161	0.0680508									1	1.05955	1.06108	0.945182	0.662675	0.487861	0.291855	0.14398					13.8268	-0.11449	0	0.985958					14.2431	-0.0947191
O75379	VAMP4	3	1	1	1.02781	1.11268	0.974846	0.748366	0.810749	0.983616	0.691948	1	1.14082	0.985083	0.85502	0.64756	1.14845	1.11515	1.02738	1	0.982476	1.1215	1.00853	0.721637	0.86627	0.889077	0.675976	1	0.912711	1.09609	0.973468	0.656996	0.869658	1.14373	0.731451		-0.536357	0.80867	0.605758		-0.103557	0.958712	0.0395733		-0.205561	0.788212	0.697362		-0.396292
O75380	NDUFS6	8	6	1	0.942296	0.968576	0.838878	0.629611	0.847425	1.15065	1.0131	1	0.949794	0.979249	0.838966	0.612514	0.890764	1.22519	1.30651	1	0.973354	0.977964	0.865582	0.67315	0.900864	1.01527	0.86783	1	1.0314	1.0266	0.872253	0.653551	0.840142	1.16273	1.22069		-0.274829	0.895934	0.0520773		-0.0631844	0.97479	-0.00375839		-0.172942	0.864537	0.300327		-0.168677
O75381	PEX14	13	6	1	1.10393	1.0825	1.00092	0.875726	0.914526	0.918071	0.504787	1	0.984191	1.02434	0.918703	0.801426	0.932504	0.923228	0.536591	1	1.00485	1.00271	1.01421	0.880497	0.872743	0.702027	0.431343	1	1.00621	1.00148	0.975485	0.819546	0.817362	0.817473	0.514952		-0.164383	0	0.839328		-0.158475	0	0.709653	20.3446	-0.0733188	0	0.961364		-0.0359309
O75382	TRIM3	4	2	1	0.99685	0.984612	0.771202	0.334643	0.121942	0.0671471	0.0728685	1	0.985734	0.925709	0.956881	0.431455	0.344983	0.263258	0.207717	1	0.953367	0.91774	0.729571	0.335217	0.112206	0.0595468	0.0423644	1	1.05851	1.05345	0.914059	0.544968	0.370982	0.271102	0.175079	10.6547	-0.171552	0.023655	0.999298	11.6389	-0.200973	0.252545	0.98621	10.4683	-0.161563	0	0.993253	12.7584	-0.115775
O75385	ULK1	3	3	1	1.03929	1.07405	0.796246	0.390411	0.258357	0.195898	0.173872	1	0.964113	0.957964	0.760481	0.340445	0.144662	0.0974344	0.0750429	1	1.01976	1.03687	0.85804	0.407523	0.287994	0.161359	0.1115	1	0.933891	0.966567	0.745943	0.371337	0.180684	0.0950311	0.0682425	11.0164	-0.157543	0.16136	0.99291	10.6529	-0.161271	0.0315546	0.9978	11.4928	-0.146421	0.0983167	0.994201	10.7928	-0.141472
O75386	TULP3	4	4	1	1.11304	1.18059	1.04939	0.584334	0.308418	0.139853	0.0612293	1	0.978502	1.03824	0.863797	0.566455	0.345724	0.271002	0.189392	1	0.995333	1.04231	0.819008	0.471959	0.251853	0.117315	0.0587218	1	1.06955	1.01328	0.879706	0.557746	0.38793	0.289604	0.149028	12.8521	-0.154432	0.0425303	0.961706	12.7335	-0.106808	0.107268	0.996647	11.6945	-0.131402	0	0.996917	13.0928	-0.0943124
O75390	CS	48	37	1	1.00749	0.991752	0.919374	0.704018	0.363182	0.0678476	0.0416896	1	1.00669	1.006	0.896814	0.778714	0.484625	0.0608404	0.0283446	1	1.01226	1.03742	0.951987	0.735306	0.386484	0.085845	0.0496189	1	0.994077	1.00153	0.922474	0.810523	0.493133	0.0924275	0.038262	13.4436	-0.151344	0	0.991852	14.2683	-0.157122	0	0.976711	13.721	-0.151225	0	0.993828	14.5044	-0.158745
O75391	SPAG7	15	12	1	1.00003	1.05104	1.01206	0.816029	1.00372	1.25133	1.07564	1	1.01581	1.06018	0.965964	0.857596	1.20363	1.56198	1.54878	1	1.05414	1.08389	1.0523	0.859612	1.05207	0.958345	0.859579	1	1.04334	1.11186	1.03168	0.926112	1.09201	1.30113	1.37096		0.129098	1.03497	0.018332		1.22449	1.5	0.936882		-0.0290444	0.931369	0.288993		0.0872826
O75394	MRPL33	4	3	1	1.23152	1.23443	1.15147	0.660142	0.410348	0.185267	0.0699729	1	1.14768	1.09305	0.965257	0.645809	0.458361	0.275447	0.0922936	1	1.19943	1.16203	1.01031	0.644538	0.381674	0.17676	0.0708162	1	1.05922	1.08266	0.920086	0.626603	0.451498	0.268005	0.131896	13.7976	-0.131865	0.00245351	0.907147	13.9454	-0.103749	0	0.963822	13.4803	-0.127242	0	0.949127	13.7586	-0.0974713
O75396	SEC22B	18	17	1	1.02751	1.00934	0.890877	0.465365	0.172367	0.0739345	0.0345662	1	0.998231	1.01377	0.841696	0.44877	0.166836	0.0628604	0.037381	1	1.00886	0.983299	0.87611	0.445288	0.160196	0.0715587	0.0366301	1	0.997456	1.00259	0.84858	0.458995	0.178333	0.0827596	0.04058	11.7333	-0.164141	0	0.999291	11.4789	-0.158145	0	0.998818	11.5755	-0.164733	0	0.999652	11.5744	-0.153115
O75398	DEAF1	2	1	1	0.872329	1.00658	0.825128	0.484384	0.34662	0.169865	0.065874	1	1.03084	1.29053	0.912651	0.485795	0.359881	0.192782	0.198107	1	0.924973	0.970477	0.881063	0.536306	0.301209	0.165393	0.0994709	1	0.93977	0.938175	1.112	0.548602	0.234271	0	0	12.0605	-0.114065	0	0.976223	12.1403	-0.14227	0.175104	0.926917	12.4044	-0.119205	0	0.993543	12.4581	-0.202198
O75400-3	PRPF40A	4	24	1	1.08455	1.06314	0.754657	0.43725	0.241538	0.214587	0.179182	1	1.00547	0.939931	0.736623	0.350907	0.169138	0.102395	0.0808157	1	0.998828	0.919994	0.662082	0.301253	0.227341	0.147864	0.102541	1	1.01562	0.95942	0.737557	0.32966	0.171028	0.102193	0.0709065	11.1273	-0.135937	0.139246	0.987774	10.638	-0.143853	0.0103584	0.998101	10.1405	-0.129344	0.0231445	0.996242	10.5623	-0.152419
O75400	PRPF40A	39		1	0.958723	0.894769	0.714068	0.33593	0.193478	0.139317	0.103033									1	0.992966	0.921644	0.711128	0.347964	0.204249	0.130616	0.105964									10.4751	-0.129556	0.00763198	0.991401					10.5419	-0.130259	0.0135154	0.996936
O75410-2	TACC1	26	18	1	0.974078	0.986017	0.909559	0.776632	0.901301	0.9734	0.755502	1	1.03885	1.04917	0.972921	0.791958	1.01732	1.14877	0.968621	1	1.0084	1.04536	1.0069	0.856959	0.979827	0.886171	0.684985	1	0.971961	1.02281	0.970133	0.845656	0.939857	1.01758	0.903159		-0.28402	0.851709	0.481796		-0.0594908	0.979917	0.0280005			0	0.778727		-0.184719
O75410	TACC1		1									1	0.959515	1.04545	0.996707	0.845146	1.04779	1.25427	1.08023									1	1.01101	1.01896	0.997163	0.865732	1.01292	1.06978	0.919875						0.354283	1.16725	0.546693						-0.0803019
O75414	NME6	2	1	1	1.08127	1.13988	0.914007	0.698904	0.442857	0.2502	0.126927	1	1.07341	1.07858	1.15341	0.678147	0.569669	0.451368	0.110829	1	1.00582	1.12952	0.936252	0.711257	0.52655	0.20406	0.0777729	1	1.00227	1.15345	1.10589	0.681571	0.445334	0.468702	0.118397	14.0394	-0.10368	0	0.973012	15.4833	-0.090272	0	0.911006	14.3577	-0.113564	0	0.970073	14.8622	-0.0926857
O75417	POLQ	2	1	1	0.994389	0.982614	0.743338	0.496014	0.254433	0.0736325	0.0589723	1	0.919042	1.09198	1.069	0.717271	0.600041	0.223346	0.09361	1	0.993777	0.961181	0.754073	0.48462	0.288399	0.0768992	0.0396778	1	0.930924	1.12651	1.01889	0.715282	0.446878	0.189744	0.11048	11.4075	-0.126849	0	0.990215	14.9385	-0.114192	0	0.953516	11.4636	-0.12561	0	0.987929	14.1241	-0.120709
O75419-3	CDC45	7	6	1	1.0025	0.959764	0.809136	0.38198	0.128177	0.0527163	0.0377122	1	0.996497	1.02681	0.867496	0.434106	0.246246	0.158158	0.091934	1	1.01968	0.997007	0.814943	0.385415	0.125391	0.0713988	0.0472145	1	0.989936	1.00181	0.874939	0.412724	0.236908	0.149461	0.0825173	11.0098	-0.166887	0	0.998391	11.6045	-0.1473	0.0709418	0.998014	11.0568	-0.164863	0	0.999175	11.4882	-0.156455
O75420	GIGYF1	3	1	1	0.96035	0.961092	0.836025	0.396608	0.235716	0.173094	0.140507	1	0.825113	1.0261	0.86526	0.417667	0.370417	0.360598	0.095904	1	0.990317	0.999499	0.863643	0.491181	0.23933	0.192251	0.134569	1	1.05223	1.13658	1.08576	0.635669	0.52289	0.490285	0	11.2022	-0.159052	0.125297	0.99691	11.8764	-0.124754	0.172522	0.919506	11.8524	-0.139197	0.0947718	0.999182	14.8607	-0.0945776
O75427	LRCH4	10	4	1	0.986004	1.0308	0.852419	0.450805	0.294647	0.250707	0.189196	1	1.01519	0.972927	0.810507	0.358834	0.227796	0.191891	0.136417	1	1.00204	0.964142	0.856855	0.436338	0.262554	0.225331	0.172085	1	1.01264	1.0738	0.836635	0.407987	0.236139	0.165135	0.127052	11.6126	-0.144647	0.186869	0.997549	10.8885	-0.170389	0.142528	0.998215	11.4837	-0.152815	0.165797	0.998185	11.2928	-0.156011
O75431	MTX2	10	6	1	1.03578	0.991785	0.832714	0.404839	0.141021	0.0439137	0.0279546	1	0.996614	0.974852	0.80401	0.341681	0.113408	0.0458466	0.0209794	1	1.01068	0.948304	0.778573	0.347873	0.122663	0.0514841	0.0338273	1	1.00419	0.932214	0.768252	0.367546	0.125918	0.0385039	0.0246425	11.2118	-0.168848	0	0.99826	10.8221	-0.178183	0	0.999407	10.7481	-0.167979	0	0.997954	10.766	-0.165174
O75436	VPS26A	31	20	1	1.02619	1.06054	0.884189	0.466539	0.173419	0.0707736	0.0429108	1	1.01642	1.06859	0.885726	0.472457	0.202631	0.0866692	0.0458989	1	1.00178	1.02523	0.868524	0.434289	0.169977	0.0796505	0.0442633	1	1.01268	1.0421	0.889772	0.475686	0.20057	0.0838124	0.0466986	11.7226	-0.162431	0	0.996685	11.8104	-0.153553	0	0.996145	11.5231	-0.160055	0	0.999451	11.8302	-0.154674
O75438	NDUFB1	3	3	1	1.10208	0.902234	1.08657	0.708299	0.725844	0.681608	0.526563	1	1.09423	1.17678	1.35517	0.79081	0.842889	0.920568	0.712116	1	0.938208	1.15976	1.03458	1.03679	0.593969	0.651955	0.505936	1	0.776078	1.04332	0.788909	0.839111	0.70481	0.692441	0.685173		-0.221854	0.644273	0.842146		-0.110299	0.81478	0.407744		-0.579918	0.578945	0.897839		-0.0461842
O75439	PMPCB	35	38	1	1.041	1.01351	0.877984	0.449104	0.170048	0.0693439	0.0418872	1	0.995574	0.978466	0.797508	0.45164	0.158169	0.0598345	0.0316605	1	1.0149	0.997973	0.82827	0.438442	0.169087	0.0699404	0.0369012	1	1.01698	0.990187	0.813531	0.457517	0.163737	0.0681674	0.0335423	11.6145	-0.162751	0	0.998552	11.29	-0.15266	0	0.996315	11.3852	-0.154956	0	0.998953	11.399	-0.152717
O75446	SAP30	5	4	1	1.10588	1.03494	0.853763	0.395332	0.15797	0.0776558	0.0518833	1	0.943404	0.965496	0.782668	0.398787	0.197875	0.117199	0.097018	1	1.0339	0.944074	0.736147	0.33925	0.134377	0.0704918	0.0436583	1	1.05259	1.01172	0.857812	0.427719	0.169759	0.112249	0.120467	11.2668	-0.168587	0.0175381	0.991488	11.0685	-0.140832	0.0287969	0.996446	10.551	-0.157025	0	0.997332	11.3725	-0.167933
O75448	MED24	18	22	1	0.982164	1.03209	0.865207	0.41587	0.211945	0.122594	0.0869779	1	0.98953	1.00021	0.814315	0.387632	0.1354	0.0589058	0.0425396	1	0.99288	1.04928	0.838601	0.40245	0.189363	0.111771	0.0602976	1	1.01785	1.00895	0.823177	0.38237	0.142968	0.0720658	0.047886	11.4353	-0.159533	0.0617477	0.998481	11.0709	-0.164895	0	0.999485	11.2927	-0.156184	0.0297045	0.997631	11.0977	-0.164147
O75449	KATNA1	11	9	1	0.992052	0.972883	0.771712	0.376746	0.17814	0.101813	0.0684547	1	1.05641	0.966972	0.680742	0.315831	0.123517	0.0388391	0.0209596	1	0.972483	0.957518	0.723269	0.363213	0.191482	0.0956792	0.0505219	1	1.00505	0.945758	0.697674	0.302173	0.102628	0.0492267	0.0202458	10.925	-0.144563	0.00535429	0.999689	10.2043	-0.163835	0	0.995951	10.6617	-0.140106	0	0.998267	10.2196	-0.169779
O75460	ERN1	6	4	1	1.43207	1.06249	0.858303	0.549316	0.36677	0.264109	0.232046	1	1.07097	0.989227	0.850034	0.384541	0.177383	0.119156	0.110139	1	1.02062	0.998006	1.0095	0.51834	0.297556	0.224343	0.184777	1	1.04808	0.968974	0.831819	0.427425	0.23616	0.135633	0.101246	12.6013	-0.110594	0.164795	0.855197	11.1472	-0.175092	0.0839011	0.995984	12.1844	-0.202868	0.208711	0.996259	11.4501	-0.139372
O75461	E2F6	2	1	1	1.09396	1.24923	1.0012	0.642633	0.291003	0.244666	0.165913	1	0.891625	0.973975	0.985352	0.479515	0.118562	0.105754	0	1	0.960499	1.08325	0.950901	0.575666	0.283975	0.19395	0.166879	1	0.780122	1.13464	0.935467	0.439718	0.134321	0	0	12.8839	-0.176867	0.18177	0.943734	11.9217	-0.230138	0.0346877	0.987741	12.5437	-0.155965	0.142976	0.992088	11.6937	-0.208726
O75462	CRLF1	3	1	1	0.948047	0.969503	0.814069	0.428857	0.168637	0.0959266	0.0865029	1	1.00781	0.952608	0.751343	0.448843	0.206146	0.0860861	0.0036257	1	1.01308	1.06659	0.926706	0.479088	0.228814	0.119778	0.0536527	1	0.989451	1.05878	0.87058	0.464328	0.225568	0.102337	0.0589312	11.2826	-0.14735	0.0135629	0.996189	11.1348	-0.139042	0	0.991997	11.9772	-0.157224	0.0316163	0.995377	11.7814	-0.143608
O75467	ZNF324	1		1	1.12139	0.970583	0.650058	0.291004	0.145043	0.036295	0.0697903									1	0.906216	0.85576	0.579956	0.210676	0.0916869	0.0320904	0									10.0138	-0.156898	0	0.988216					9.28966	-0.172827	0	0.981745
O75475	PSIP1	21	19	1	0.961061	0.911477	0.779558	0.440743	0.294588	0.233304	0.142325	1	1.00387	1.00006	0.845611	0.47487	0.33522	0.263912	0.17098	1	0.982991	0.965807	0.814547	0.459156	0.297356	0.210587	0.13543	1	1.02332	0.959134	0.838102	0.469277	0.304017	0.228523	0.167033	11.5744	-0.102435	0	0.991265	11.9976	-0.119636	0.143091	0.996705	11.7579	-0.115428	0.0554666	0.998001	11.8291	-0.123338
O75477	ERLIN1	20	13	1	0.972477	0.918134	0.678411	0.261134	0.0651127	0.0358427	0.0260135	1	1.00145	0.868933	0.673116	0.223211	0.0298576	0.0143721	0.00469804	1	0.963959	0.897432	0.644977	0.231428	0.0671873	0.0465037	0.0405189	1	0.974631	0.910458	0.652305	0.208055	0.0449072	0.0216394	0.014027	9.98267	-0.184131	0	0.994818	9.83828	-0.206739	0	0.987828	9.74814	-0.181094	0	0.992722	9.73839	-0.204518
O75478	TADA2A	2		1	0.90493	1.04639	0.892203	0.475181	0.223528	0.0825049	0.0890893									1	1.09344	1.06577	0.817757	0.425058	0.192205	0.119871	0.0626903									11.8454	-0.153407	0.0283435	0.98968					11.3553	-0.144799	0.0122329	0.989881
O75486	SUPT3H		1									1	0.993069	0.930984	0.647988	0.362508	0.206713	0.0556421	0.0998605									1	0.979417	1.0051	0.745905	0.328009	0.180177	0.125333	0.152961					10.2344	-0.131951	0	0.994373					10.4682	-0.176348
O75487	GPC4	3	7	1	1.01674	1.03481	0.971671	0.675152	0.523756	0.415386	0.188458	1	1.0113	1.03983	0.951873	0.628809	0.575552	0.523339	0.290549	1	0.986745	0.964963	0.861547	0.599543	0.460021	0.303867	0.150382	1	1.02451	1.02793	0.94306	0.668285	0.533123	0.415674	0.26343	15.0791	-0.0801231	0	0.979682	16.235	-0.0615957	0	0.953407	13.5641	-0.0872925	0	0.990305	15.3286	-0.0718068
O75489	NDUFS3	19	16	1	1.28678	1.02889	0.807765	0.474209	0.251489	0.119284	0.0784572	1	1.00348	1.01433	0.861827	0.478708	0.253027	0.141145	0.0898668	1	1.05355	1.06481	0.838883	0.474904	0.236174	0.129247	0.0743322	1	0.996437	0.966457	0.816206	0.427597	0.232092	0.122681	0.0823987	11.6641	-0.12786	0	0.94332	11.8819	-0.132842	0.0213401	0.999548	11.7718	-0.132575	0	0.993907	11.4317	-0.132319
O75494	SRSF10	2	3	1	1.00815	1.04159	0.75927	0.406653	0.283384	0.180362	0.0939318	1	0.938697	0.903719	0.715811	0.322204	0.205112	0.119371	0.0586953	1	0.965727	0.802068	0.784521	0.396357	0.266262	0.183314	0.111582	1	1.02361	0.910951	0.728355	0.338461	0.231504	0.157551	0.0656804	11.2608	-0.121897	0.032321	0.994359	10.4649	-0.13554	0	0.99003	11.1055	-0.110736	0	0.962757	10.6496	-0.12656
O75496	GMNN	4	9	1	0.531042	0.496827	0.510807	0.408714	0.429743	0.507388	0.445183	1	1.03727	1.027	0.953408	0.617837	0.743131	0.935333	0.877691	1	0.978663	1.06605	1.06882	0.839291	1.10545	1.03507	1.03814	1	1.02038	1.05177	0.950071	0.677453	0.674718	0.806143	0.783685	4.80046		0	0.967513		-0.55635	0.793498	0.592175		0.0861292	1.02547	0.0368212		-0.69994
O75503	CLN5	17	14	1	0.979137	1.18082	0.967758	0.745819	0.767954	0.497628	0.165094	1	1.0245	1.13158	0.977785	0.790514	0.810705	0.617871	0.181135	1	0.986247	1.04247	1.00631	0.829502	0.827038	0.472037	0.157558	1	1.0516	1.15236	1.15675	0.812184	0.846727	0.616215	0.209451	17.1037	-0.0877458	0	0.888666	18.2023	-0.109857	0	0.88895	17.5451	-0.128438	0	0.960528	18.4554	-0.120824
O75506	HSBP1	5	6	1	1.8767	0.958635	1.03224	0.757143	1.31757	0.862278	1.22999	1	1.19916	0.98264	1.20577	0.617435	1.66536	1.4544	1.32454	1	0.497748	0.920784	1.04159	0.934284	0.941093	0.625741	0.813743	1	1.01276	1.11245	0.935396	0.578309	1.17795	1.36903	0.616468		0.0263292	1.12067	-0.113566		0.160406	1.4696	0.51309		0	0.719742	-0.105884		-0.151734
O75509	TNFRSF21	3	2	1	0.982873	1.05814	0.880137	0.739003	0.817304	0.894457	0.839364	1	0.975169	0.966545	0.85351	0.729938	0.799274	0.886983	0.52134	1	0.877984	0.917297	0.872372	0.704704	0.789516	0.690599	0.549783	1	1.01045	1.07558	0.964801	0.78784	0.938923	0.888591	0.610282		-0.446099	0.822532	0.795044		-0.0267185	0	0.633623		-0.0321699	0	0.778726		-0.0274316
O75521	ECI2	21	19	1	0.994493	1.02888	0.96932	0.839399	0.93398	0.909468	0.514956	1	1.01159	1.06705	0.99327	0.810286	0.974968	1.01683	0.590173	1	1.00499	1.0305	0.996331	0.872782	0.96736	0.802188	0.438333	1	0.986538	1.03531	0.969914	0.845772	0.91347	0.921363	0.593458		-0.154142	0	0.838141		0	0	0.760567	20.4938	-0.125052	0	0.938062
O75525	KHDRBS3	2	3	1	0.699405	0.571289	0.566439	0.328437	0.218207	0.117297	0.0729408	1	0.970822	1.03135	0.866414	0.487522	0.191932	0.0630979	0.0143324	1	1.0335	0.953637	0.813711	0.536877	0.307527	0.189859	0.115401	1	1.00826	0.989407	0.880992	0.524518	0.196033	0.0814823	0.0312288	5.87653	-0.153012	0	0.844164	11.7888	-0.15914	0	0.996665	12.198	-0.10822	0	0.996625	12.0283	-0.155715
O75528	TADA3	3	5	1	0.900843	0.848503	0.735766	0.337543	0.14676	0.0879289	0.0472591	1	0.9734	0.986796	0.858302	0.410853	0.265702	0.202082	0.15453	1	1.02462	0.969808	0.815911	0.433553	0.201764	0.109578	0.0671961	1	0.938698	1.0232	0.854168	0.446562	0.314735	0.237009	0.113807	10.5042	-0.148175	0	0.973869	11.3632	-0.159465	0.154761	0.997988	11.3897	-0.138968	0	0.999003	11.8391	-0.125966
O75529	TAF5L	2	1	1	1.00293	1.11004	0.846872	0.301566	0.197386	0.134253	0.0952984	1	0.932075	0.89564	0.686939	0.225377	0.0282631	0.0126431	0.0136898	1	1.0079	1.05583	0.829261	0.324173	0.138395	0.122174	0.0804623	1	1.04571	0.904381	0.674242	0.207584	0.0539984	0.0287672	0.0186415	10.7401	-0.211114	0.115785	0.989374	9.90753	-0.209812	0	0.988236	10.7823	-0.197085	0.0788317	0.997196	9.8365	-0.204307
O75530	EED	16	11	1	1.03193	1.03952	0.86641	0.413113	0.148576	0.0528027	0.0324425	1	1.00382	1.0151	0.880544	0.461829	0.232599	0.136033	0.0765863	1	1.01181	1.00936	0.841953	0.41602	0.159631	0.057114	0.0295102	1	0.979854	1.00549	0.852154	0.462342	0.219051	0.134447	0.0886526	11.3861	-0.171977	0	0.998013	11.7833	-0.145486	0.0373798	0.999314	11.3241	-0.163794	0	0.999323	11.6726	-0.141143
O75531	BANF1	26	21	1	1.0012	1.05856	1.00339	0.801197	1.04029	1.28473	0.996073	1	0.989873	1.09184	1.0775	0.827547	1.21503	1.47243	1.42493	1	1.02725	1.15439	1.13284	1.03798	1.20269	1.1991	0.97985	1	1.07489	1.1044	1.03994	1.04104	1.2495	1.48709	1.40842		0.0133703	1.1304	0.171288		1.04055	1.44868	0.867708		0.272702	1.11781	0.289932		1.02305
O75533	SF3B1	81	58	1	1.04354	1.09992	0.935132	0.582743	0.236644	0.0705779	0.0481422	1	0.994048	0.98581	0.864852	0.577103	0.253424	0.0731337	0.0476447	1	1.01502	1.01978	0.903991	0.55591	0.21852	0.0797052	0.0513093	1	1.02725	1.00494	0.89891	0.590086	0.264235	0.0785825	0.0398512	12.523	-0.15985	0	0.991064	12.3617	-0.144023	0	0.995034	12.2915	-0.154298	0	0.998675	12.5509	-0.148697
O75534-3	CSDE1		76									1	1.00086	0.989212	0.848369	0.502263	0.169703	0.0436096	0.0271217									1	1.01252	0.99928	0.875996	0.520119	0.173328	0.0577836	0.0334389					11.759	-0.161211	0	0.995961					11.9531	-0.163678
O75534	CSDE1	89	2	1	1.01488	0.99762	0.868814	0.493432	0.162108	0.0472837	0.0314052	1	1.02588	1.13095	0.994583	0.567446	0.375637	0.232117	0.155912	1	1.0237	1.00651	0.868406	0.495258	0.165591	0.0614441	0.0362096	1	0.962986	0.98309	0.974737	0.612046	0.243224	0.14738	0.14197	11.7784	-0.166297	0	0.99773	12.9209	-0.133087	0.141092	0.976782	11.7918	-0.162312	0	0.997909	12.6208	-0.188422
O75554	WBP4	20	11	1	1.07247	1.12793	1.05477	0.864825	1.04699	1.29834	1.02348	1	0.996071	1.0257	0.977476	0.883656	1.17018	1.48018	1.35034	1	1.01921	1.06803	0.995162	0.857034	1.00084	0.986285	0.771168	1	1.01976	1.03663	0.981938	0.923828	1.00192	1.14618	1.21923			1.08585	0.0407152		0.990803	1.41526	0.922686			0.00618846	0.617665		0.0881686
O75556	SCGB2A1		1									1	1.40585	1.02255	0.984871	0.488125	0.44928	0.653935	0.43308									1	0.593153	0.707398	0.786644	0.7813	0.496106	0.348778	0.509891						-1.54213	0.506105	0.773932
O75569	PRKRA	11	13	1	0.957945	0.964611	0.793247	0.433807	0.232255	0.0740603	0.0315445	1	0.941936	0.898794	0.760003	0.434035	0.292928	0.161016	0.079849	1	0.999878	0.949251	0.78101	0.423783	0.238809	0.0920616	0.0395411	1	0.950546	0.910016	0.710685	0.427685	0.291567	0.158232	0.0778041	11.3149	-0.140084	0	0.994405	11.3053	-0.113939	0	0.986858	11.2358	-0.135249	0	0.995875	11.0017	-0.112488
O75570	MTRF1	2	1	1	0.993732	1.09032	0.779232	0.415999	0.327904	0.230462	0.228693	1	0.925839	0.970938	0.789867	0.367845	0.140985	0.0618841	0.08022	1	0.981708	0.96753	1.01783	0.48872	0.366501	0.296573	0.280081	1	1.02887	0.954019	0.74358	0.364819	0.18647	0.0773901	0.0743359	11.1602	-0.143967	0.212954	0.988474	10.8824	-0.161998	0.0154941	0.993974	11.9675	-0.259933	0.308837	0.99349	10.751	-0.142275
O75575	CRCP		1									1	0.986427	0.76955	0.84235	0.821773	1.01178	1.06308	1.12358									1	1.12389	0.927499	0.85432	0.771793	0.922632	1.08052	1.10294						-0.408439	0.938684	0.0409711						-0.205612
O75581	LRP6	6	3	1	1.03784	1.04468	0.880143	0.503186	0.242761	0.131923	0.0707538	1	0.936303	0.97009	0.854956	0.474063	0.223662	0.178511	0.205813	1	1.02355	1.01807	0.891858	0.491893	0.246385	0.134059	0.0612666	1	0.884998	1.04255	0.655743	0.397447	0.227706	0.153025	0.127564	12.0528	-0.135538	0.00154003	0.997025	11.5985	-0.152925	0.149289	0.992001	12.0363	-0.137552	0.00323649	0.998688	10.5565	-0.129607
O75582	RPS6KA5	12	12	1	0.979448	1.00668	0.78355	0.465533	0.139878	0.0703214	0.031462	1	0.964986	0.942273	0.771558	0.326376	0.136272	0.075262	0.0514783	1	0.977084	0.957316	0.790123	0.363814	0.128081	0.068144	0.0380018	1	0.973591	0.922368	0.720545	0.328364	0.13402	0.0686358	0.0505826	11.2723	-0.151553	0	0.993915	10.6556	-0.165667	0.0109426	0.996932	10.8685	-0.163756	0	0.998213	10.431	-0.155383
O75586	MED6	4	3	1	0.916371	0.937259	0.861479	0.446339	0.179045	0.0380647	0.0341602	1	0.883723	0.874491	0.864551	0.486178	0.170128	0.0452765	0.0322498	1	1.04437	1.03585	0.842752	0.519984	0.177077	0.0681153	0.0302638	1	0.909889	0.926663	0.796707	0.53253	0.191219	0.0709959	0.0305859	11.5417	-0.163109	0	0.98987	11.7269	-0.162843	0	0.973232	11.8463	-0.154642	0	0.993604	11.7168	-0.142301
O75592	MYCBP2	26	24	1	0.992631	1.05368	0.660807	0.248408	0.104535	0.0698321	0.0461573	1	0.996178	0.911897	0.66625	0.288774	0.19395	0.179109	0.153585	1	0.998189	0.929074	0.640783	0.235488	0.0990639	0.0726765	0.0491343	1	0.978673	0.945764	0.668661	0.285773	0.160527	0.187549	0.12809	9.91758	-0.190217	0.0311881	0.996989	9.98765	-0.16161	0.124915	0.994341	9.76701	-0.173135	0.00890839	0.997698	9.97008	-0.177783
O75600-2	GCAT	11	13	1	1.01069	1.03062	0.898583	0.488135	0.321048	0.192895	0.0855559	1	1.01906	0.945665	0.787248	0.500231	0.324833	0.181392	0.0378059	1	1.01224	1.07129	0.877726	0.509433	0.33998	0.152417	0.0751739	1	0.992612	0.957397	0.807359	0.493988	0.327979	0.182962	0.0735729	12.2772	-0.121931	0.0260012	0.994039	11.8771	-0.113377	0	0.988733	12.3577	-0.11998	0	0.990915	11.9782	-0.111486
O75607	NPM3	9	13	1	0.962386	0.923969	0.853906	0.589603	0.461218	0.260327	0.0983701	1	1.10137	1.39841	1.41888	1.28674	1.10413	0.763143	0.269347	1	1.01207	0.943889	0.905776	0.641481	0.512735	0.274939	0.0961549	1	1.14981	1.39149	1.53911	1.36935	1.02575	0.703746	0.312191	13.2767	-0.0944303	0	0.976222	18.2072	-1.3305	0.269347	0.568024	14.0119	-0.0960116	0	0.977123	18.2116	-1.02947
O75608	LYPLA1	12	14	1	0.982546	1.06999	0.908953	0.786562	0.854272	0.863063	0.56587	1	0.976118	1.00144	0.875246	0.804056	0.952655	1.10628	0.778039	1	0.99213	1.01531	0.991442	0.845974	0.96136	0.806049	0.484492	1	0.97831	0.996285	0.890941	0.856812	0.957564	1.04016	0.729124		-0.0256821	0	0.717454		-0.493006	0.903256	0.173161	20.8933	-0.106975	0	0.895763		-0.266557
O75616	ERAL1	22	12	1	1.03169	0.970442	0.785844	0.361692	0.156262	0.0787749	0.0477374	1	0.973294	0.997941	0.784359	0.380551	0.194736	0.109575	0.0981071	1	1.00351	0.998114	0.779595	0.361839	0.140221	0.0722376	0.0499661	1	0.990775	0.996074	0.76715	0.372982	0.161001	0.115363	0.0907006	10.8887	-0.15579	0	0.998844	10.9736	-0.150146	0.0461411	0.999222	10.8464	-0.159163	0	0.999824	10.827	-0.153923
O75629	CREG1	2	2	1	0.980968	1.70086	0.891045	0.719519	0.731213	0.807882	0.652155	1	1.2511	1.21503	1.00131	0.883958	1.21096	1.41059	1.23741	1	1.00246	1.05784	1.04306	0.745595	0.838995	0.571712	0.42239	1	1.0218	1.21876	1.00181	0.697736	0.905231	0.988872	1.23001						0.727098	1.324	0.341175	19.7727	-0.0540705	0	0.8996		-0.141915
O75635	SERPINB7	1	1	1	0.662824	5.52893	0.672503	0.285451	0.533167	0.218375	0.430616	1	0.560363	0.425986	0.370592	0.36349	1.07846	0.95462	0.577891	1	1.07616	1.20546	1.19365	0.890671	0.838917	0.818882	0.46945	1	0.828463	1.47263	0.771483	0.457888	1.45996	1.20132	1.33617	9.33192	-0.611886	0.367129	0.0671384						-0.0706696	0	0.729552		0.101668
O75643	SNRNP200	128	105	1	0.998736	0.959549	0.763976	0.289971	0.087846	0.0541539	0.0351597	1	0.99223	0.956055	0.751502	0.287901	0.0789547	0.0515296	0.0412056	1	1.00398	0.963224	0.746284	0.27507	0.0972192	0.0586451	0.0393794	1	0.993766	0.971537	0.757559	0.279577	0.0883405	0.0556643	0.0450602	10.4601	-0.185795	0.00430447	0.998849	10.395	-0.185446	0.00363969	0.998322	10.342	-0.18676	0.0129395	0.99922	10.3884	-0.191112
O75648	TRMU	12	16	1	1.04076	0.997716	0.84206	0.424664	0.196279	0.108203	0.0644079	1	0.9852	0.98586	0.782791	0.388196	0.185394	0.118063	0.0857016	1	1.00615	0.96854	0.795859	0.399916	0.173046	0.102077	0.0606737	1	1.00596	0.989635	0.76609	0.399075	0.199095	0.116278	0.0784517	11.4263	-0.148515	0.0150241	0.998676	11.0054	-0.146511	0.0319312	0.999749	11.1141	-0.145336	0	0.999393	11.046	-0.135231
O75663	TIPRL	24	17	1	0.963151	0.974207	0.899752	0.662788	0.297395	0.0378833	0.0209588	1	0.985797	1.04781	0.93814	0.70916	0.403812	0.0821961	0.0308991	1	1.00148	1.02205	0.960858	0.73533	0.324961	0.0590807	0.0288637	1	1.00565	1.01894	0.957525	0.762887	0.41151	0.0944149	0.0381422	13	-0.163135	0	0.989618	13.6356	-0.146891	0	0.98866	13.4843	-0.170542	0	0.9968	13.9507	-0.153674
O75665	OFD1	1		1	0.907851	0.947163	0.846715	0.366575	0.289009	0.292917	0.262441									1	0.969192	0.996634	0.829876	0.454097	0.283845	0.224193	0.208593									10.7591	-0.215815	0.274059	0.985337					11.5365	-0.140011	0.176057	0.998944
O75674	TOM1L1	17	14	1	0.95485	1.01459	0.920631	0.776635	0.907562	1.00805	0.634521	1	0.9842	1.09288	0.990024	0.84458	1.04579	1.27499	0.882558	1	0.98754	1.03755	1.01326	0.87629	1.02793	0.926361	0.563872	1	0.996237	0.963212	0.963647	0.843321	1.00179	1.06511	0.757918		-0.0163261	0.159125	0.35078		0.0107056	1.06035	0.0607144		-0.622582	0.563872	0.897107		-0.00877514
O75676	RPS6KA4	11	13	1	0.972609	1.00474	0.722499	0.268134	0.100716	0.0717914	0.0413762	1	0.995426	0.906588	0.689713	0.240004	0.0707657	0.0371244	0.0375125	1	0.976461	0.949471	0.722266	0.261797	0.11055	0.0802964	0.0465004	1	0.961822	0.903175	0.654665	0.221708	0.0703856	0.0532366	0.0303972	10.2253	-0.187218	0.0225962	0.999237	9.98593	-0.188373	0	0.994472	10.1971	-0.185838	0.0294963	0.997975	9.78422	-0.185352
O75683	SURF6	2	4	1	1.06597	1.05657	0.888191	0.559743	0.312481	0.187711	0.131321	1	0.989241	0.956037	0.708255	0.318763	0.18211	0.141774	0.0383978	1	1.08332	1.03425	0.909625	0.465162	0.416585	0.183298	0	1	0.997252	0.984285	0.764093	0.324398	0.165036	0.127788	0.129222	12.5802	-0.1193	0.0403698	0.992941	10.4471	-0.140424	0	0.996889	12.4465	-0.118611	0	0.965331	10.5311	-0.179596
O75688-2	PPM1B		2									1	1.02942	0.986913	0.872538	0.716663	0.803239	0.967845	0.804									1	0.944981	1.04706	0.903719	0.739692	0.730418	0.817982	0.671289						-0.441364	0.822937	0.628822						-0.654412
O75688	PPM1B	21	23	1	0.966016	1.05817	0.904912	0.779151	0.924737	1.05201	0.766996	1	1.03081	1.06959	0.96596	0.812858	1.07584	1.24018	0.98413	1	1.00372	1.0464	0.995628	0.90291	1.02033	0.956539	0.684251	1	0.998201	1.03982	0.999401	0.839024	0.995917	1.08971	0.924055		-0.294557	0.880723	0.324777		0.0141745	1.10827	0.162684			0.0884147	0.872142		-0.0977599
O75689	ADAP1	4	5	1	1.02931	1.04861	0.928579	0.835754	0.345758	0.0799773	0.038248	1	0.96065	1.03409	0.917855	0.580833	0.379081	0.16857	0.0184819	1	0.946569	1.00114	1.00557	0.709857	0.450346	0.145274	0.0380084	1	1.07096	1.09631	1.01154	0.612954	0.347506	0.155852	0.0273558	13.9783	-0.184779	0	0.993846	12.9376	-0.123911	0	0.98713	13.9609	-0.134793	0	0.987765	13.1518	-0.137699
O75691	UTP20	8	8	1	0.955866	0.887001	0.667502	0.258399	0.12642	0.0897535	0.0643252	1	1.08894	0.951921	0.707023	0.262554	0.0964619	0.0791948	0.0506818	1	0.929895	0.937771	0.655558	0.249674	0.1462	0.108504	0.0661787	1	0.934994	0.931437	0.668109	0.238399	0.0937559	0.0463359	0.0571826	9.92569	-0.154063	0	0.990756	10.1281	-0.184747	0.0262577	0.993092	9.88208	-0.168893	0.0434827	0.99351	9.89858	-0.182542
O75694	NUP155	50	35	1	1.04742	1.05658	0.859243	0.398087	0.15661	0.0838496	0.0551952	1	1.01618	1.01123	0.779229	0.37292	0.124443	0.0797242	0.0572931	1	1.00045	0.985734	0.801669	0.354698	0.144306	0.077366	0.0508638	1	1.00567	0.998411	0.767849	0.357562	0.128475	0.0637735	0.0401206	11.2887	-0.171103	0.0252499	0.996059	10.8688	-0.15964	0.00232446	0.998743	10.8964	-0.165428	0.0122151	0.999921	10.7613	-0.162502
O75695	RP2	7	8	1	1.03783	1.06868	0.953701	0.720707	0.51101	0.261517	0.0806006	1	0.967819	1.00527	0.895927	0.68184	0.556308	0.301038	0.0460113	1	1.00623	1.01721	0.964181	0.738355	0.560783	0.271731	0.0706185	1	0.982717	1.01118	0.934815	0.713969	0.530928	0.299472	0.0763225	14.4879	-0.108744	0	0.983861	14.4462	-0.099698	0	0.961223	14.8438	-0.110036	0	0.982315	14.6087	-0.102521
O75712	GJB3	1		1	1.0366	1.08877	1.09472	0.685127	0.467146	0.285061	0.185942									1	1.02006	1.16456	1.04899	0.676229	0.474745	0.3084	0.163778									14.2122	-0.115538	0.13249	0.970134					14.3969	-0.102504	0.0570175	0.958825
O75716	STK16	1		1	0.969498	0.937349	0.755526	0.544288	0.320633	0.317898	0.238503									1	0.971765	0.921249	0.867641	0.54606	0.354899	0.278207	0.121896									12.3167	-0.0859481	0.0399587	0.992008					12.7627	-0.0982791	0	0.987881
O75717	WDHD1	54	58	1	1.04219	1.04567	0.872622	0.427829	0.189172	0.126419	0.0966464	1	0.977243	1.0112	0.815043	0.401116	0.143854	0.0796884	0.0697717	1	1.01368	0.986991	0.819794	0.397345	0.170892	0.119196	0.0892128	1	1.01893	0.999978	0.834842	0.403773	0.152278	0.0879409	0.0705843	11.4645	-0.166241	0.0707084	0.996911	11.1348	-0.15952	0.0124758	0.998707	11.138	-0.158363	0.050299	0.999582	11.2187	-0.162975
O75718	CRTAP	11	7	1	1.04403	0.958656	0.811905	0.393789	0.152501	0.0652356	0.0357399	1	0.984907	0.942367	0.758212	0.356479	0.122185	0.0461363	0.0451852	1	0.979408	0.958863	0.764691	0.372343	0.147766	0.0726909	0.0436605	1	1.00178	1.00672	0.762911	0.372269	0.134345	0.070252	0.0350177	11.102	-0.1596	0	0.997218	10.6857	-0.162989	0	0.996736	10.817	-0.154105	0	0.998358	10.8042	-0.158578
O75746	SLC25A12	32	21	1	0.981252	0.945843	0.760433	0.371464	0.196105	0.153478	0.112915	1	0.981837	0.942323	0.748729	0.346179	0.142322	0.0933169	0.0801521	1	0.965635	0.917792	0.704975	0.366288	0.224169	0.131935	0.0959721	1	0.985927	0.968744	0.729142	0.329708	0.136135	0.0914786	0.0713943	10.8139	-0.14565	0.0697225	0.997667	10.6257	-0.155487	0.021977	0.997384	10.6087	-0.124008	0	0.996032	10.4853	-0.158544
O75771-8	RAD51D	3	2	1	1.36235	1.35363	1.14388	0.585765	0.233539	0.0510266	0.0673968	1	0.984773	1.01176	0.795583	0.373805	0.121544	0.00204581	0.0346412	1	1.05313	0.991929	0.858229	0.397644	0.13678	0.0539086	0.0305665	1	1.11634	1.02637	0.719171	0.447133	0.132407	0	0	12.5504	-0.214624	0.0570883	0.869775	10.9074	-0.175198	0	0.996565	11.2747	-0.174066	0	0.997934	10.852	-0.157235
O75781	PALM	6	3	1	1.00285	1.01375	0.958057	0.742896	0.870801	0.966255	0.759254	1	0.958301	1.03932	0.93642	0.599416	0.555038	0.559006	0.605198	1	0.994334	1.07837	1.01431	0.826715	0.929414	0.830208	0.714035	1	0.926675	1.06933	0.966676	0.627943	0.538837	0.445972	0.478693		-0.430113	0.834802	0.612626		-0.180158	0.573193	0.985319		-0.0218753	0	0.771192	15.2134	-0.12794
O75787	ATP6AP2	7	8	1	1.03068	1.07018	0.848793	0.433566	0.238775	0.14196	0.078645	1	1.01154	0.949471	0.840209	0.462084	0.299079	0.241709	0.182583	1	1.01645	1.0062	0.840761	0.4731	0.254521	0.145628	0.0915212	1	0.972408	0.975814	0.833649	0.499862	0.300447	0.211337	0.184815	11.5661	-0.14284	0.0424746	0.994186	11.7261	-0.130105	0.154701	0.99677	11.8075	-0.127319	0.00874026	0.999548	11.9781	-0.119367
O75792	RNASEH2A	15	16	1	0.986111	0.94731	0.847427	0.465481	0.166748	0.0571272	0.0375818	1	1.0248	1.01904	0.89298	0.536374	0.174908	0.0550436	0.0324658	1	0.963118	0.988502	0.897244	0.510336	0.191107	0.0734959	0.0501993	1	1.02779	0.991551	0.890872	0.541333	0.185703	0.0619378	0.0353398	11.5667	-0.158485	0	0.996241	12.0903	-0.168938	0	0.997461	11.9935	-0.158571	0	0.998404	12.1241	-0.164021
O75794	CDC123	22	18	1	0.986848	0.9958	0.829461	0.423301	0.186836	0.0820654	0.0492581	1	0.99102	1.00107	0.806111	0.440416	0.181686	0.0532934	0.0253247	1	0.987815	0.979307	0.8431	0.454226	0.192506	0.081399	0.0480786	1	1.01271	0.956756	0.818239	0.439748	0.176452	0.0683504	0.0287495	11.36	-0.150083	0	0.99969	11.3148	-0.152803	0	0.997202	11.5522	-0.149074	0	0.99918	11.3524	-0.152509
O75808	CAPN15	5	7	1	1.03196	1.11844	0.891124	0.535567	0.281246	0.192369	0.151575	1	1.01872	1.12075	0.949597	0.507596	0.259744	0.0987358	0.0570418	1	0.944332	0.916818	0.808773	0.476317	0.272737	0.166419	0.108278	1	1.01377	1.05776	0.954783	0.518793	0.207297	0.11612	0.0832209	12.2742	-0.134983	0.103626	0.986552	12.2379	-0.152615	0.016401	0.987143	11.7358	-0.115042	0	0.991507	12.1372	-0.178945
O75815	BCAR3	7	6	1	1.08357	1.11713	0.93826	0.516753	0.26386	0.171273	0.120254	1	0.940249	0.980151	0.866551	0.426903	0.221835	0.146427	0.0927354	1	1.05623	1.04455	0.934504	0.50623	0.25741	0.184955	0.112151	1	0.911232	0.981188	0.813611	0.451632	0.235192	0.160202	0.0856572	12.1984	-0.155977	0.104665	0.983332	11.5052	-0.154007	0.0705791	0.99604	12.1267	-0.155924	0.106072	0.994568	11.5683	-0.126044
O75817	POP7	1	2	1	1.02618	1.12696	0.943265	0.580669	0.454164	0.443139	0.262374	1	1.04441	1.02827	0.858389	0.630398	0.712008	0.814712	0.640723	1	0.919745	1.05549	0.760425	0.518211	0.451165	0.388403	0.17209	1	0.907213	1.05043	0.912693	0.677859	0.709013	0.798291	0.577409	13.529	-0.109608	0.307819	0.958353		-0.748663	0.69946	0.880135	13.0469	-0.0791155	0	0.957365		-0.793084
O75818	RPP40	10	10	1	1.0526	1.0416	0.975539	0.75568	0.813609	0.796634	0.487408	1	1.00633	1.0449	0.900803	0.679423	0.779466	0.868787	0.57484	1	0.970203	0.996134	0.930085	0.722664	0.766565	0.600596	0.375919	1	1.00041	1.04836	0.940396	0.724693	0.76667	0.802045	0.53831		-0.0351155	0	0.817161		-0.683726	0.725629	0.744916	19.5048	-0.0488536	0	0.920163		-0.0303025
O75820	ZNF189	1		1	0.929471	0.825794	0.598371	0.19182	0.0631003	0.0705174	0.0323452									1	0.970735	0.949579	0.640963	0.230888	0.0884784	0.0850854	0.0485841									9.26198	-0.168946	0	0.977634					9.75414	-0.185113	0.0259534	0.997846
O75821	EIF3G	33	43	1	1.03137	1.0064	0.839931	0.445349	0.252154	0.17784	0.0942517	1	0.979573	0.981997	0.816238	0.450616	0.265378	0.219971	0.121781	1	1.00587	0.951679	0.756314	0.41525	0.224245	0.157175	0.0886371	1	0.992188	0.96103	0.788924	0.433292	0.250313	0.195678	0.129949	11.6283	-0.133637	0.0534656	0.997865	11.6041	-0.125093	0.0779131	0.997479	11.1214	-0.123085	0	0.998801	11.3603	-0.12552
O75822	EIF3J	21	15	1	1.00656	1.02525	0.845501	0.471001	0.263172	0.324038	0.241153	1	0.965443	1.01201	0.813548	0.445575	0.267634	0.324155	0.334487	1	1.01819	0.987462	0.779748	0.435961	0.249072	0.2524	0.190212	1	1.02257	1.0193	0.806725	0.450761	0.248561	0.272008	0.30176	11.5456	-0.152219	0.245588	0.992896	11.1084	-0.170439	0.299613	0.991162	11.2099	-0.136948	0.166197	0.997743	11.1832	-0.15899
O75828	CBR3	1	6	1	0.997587	2.39472	0.881162	0.697062	0.301313	0	0.0755381	1	1.03886	1.05359	0.957241	0.623248	0.245603	0.0903577	0.0750856	1	1.37249	1.13814	1.05238	0.81377	0.317727	0.169184	0.153189	1	0.990264	1.06926	0.952961	0.721717	0.305449	0.1231	0.0736658	13.1565	-0.168739	0	0.514703	12.7564	-0.164905	0.025206	0.996341	13.671	-0.200721	0.139813	0.89792	13.4184	-0.154585
O75832	PSMD10	11	13	1	1.08843	1.09364	0.999021	0.681596	0.514853	0.370382	0.119551	1	0.994939	0.983167	0.872958	0.596878	0.535073	0.408039	0.133595	1	1.06022	1.02282	0.936974	0.593721	0.510705	0.285247	0.0878593	1	1.04785	0.994438	0.922163	0.655397	0.540759	0.412512	0.128369	14.76	-0.0925077	0	0.963011	14.258	-0.0781509	0	0.959887	13.848	-0.0963395	0	0.971401	14.7672	-0.0819616
O75843	AP1G2	11	8	1	1.03477	1.03873	0.867486	0.427979	0.121462	0.0491723	0.0394726	1	1.00047	1.04975	0.869052	0.488892	0.204235	0.106321	0.0936143	1	0.973973	1.01228	0.86052	0.442919	0.152322	0.069872	0.0361251	1	0.965543	1.01395	0.860917	0.515633	0.192195	0.0973185	0.0886533	11.4224	-0.17709	0	0.997316	11.818	-0.148217	0.0283868	0.997274	11.5031	-0.164007	0	0.998916	11.9161	-0.144008
O75844	ZMPSTE24	28	20	1	0.981487	0.965856	0.9106	0.718716	0.55316	0.226597	0.057205	1	0.995431	1.01618	0.874758	0.723814	0.642475	0.359599	0.0515931	1	0.994152	1.01147	0.944437	0.766127	0.593005	0.251586	0.0700038	1	1.03091	1.01618	0.939079	0.792836	0.601932	0.333755	0.0909737	14.5187	-0.111873	0	0.972603	15.3151	-0.0970642	0	0.936748	15.0848	-0.11614	0	0.979465	15.4923	-0.106892
O75845	SC5D	2	1	1	0.993221	0.954501	0.865114	0.437869	0.198485	0.0869174	0.0546764	1	0.966626	1.01636	0.748563	0.409316	0.154659	0.0267973	0	1	0.986157	1.00518	0.872483	0.458595	0.215284	0.100591	0.0549413	1	0.978706	0.879445	0.836278	0.40882	0.153875	0.0524983	0.0406001	11.5697	-0.150526	0	0.998359	10.8825	-0.158067	0	0.992413	11.7323	-0.145997	0	0.999641	11.2453	-0.162312
O75864	PPP1R37	3	5	1	1.02242	0.993694	0.813123	0.452855	0.24499	0.161018	0.0358397	1	1.12767	1.13153	0.950986	0.567885	0.390503	0.223105	0.214757	1	1.02855	1.01969	0.926949	0.455196	0.183447	0.11216	0.0395827	1	0.904071	0.967751	0.914368	0.449784	0.329598	0.204128	0.146251	11.5855	-0.128891	0	0.996612	12.8815	-0.127046	0.171094	0.965416	11.7746	-0.174282	0.0348383	0.998202	11.9008	-0.146854
O75865-2	TRAPPC6A		2									1	1.06803	1.14532	0.974535	0.765689	0.635459	0.592461	0.292177									1	0.923635	1.12567	0.836812	0.752324	0.749618	0.527826	0.273567					17.6545	-0.061496	0	0.918622					17.6233	-0.0602685
O75874	IDH1	68	42	1	1.01609	1.02785	0.870677	0.598383	0.451796	0.271196	0.0908732	1	0.961377	0.971763	0.848849	0.590054	0.477223	0.344879	0.099141	1	1.0138	1.02098	0.90465	0.623903	0.476179	0.259538	0.0977677	1	0.991243	0.985769	0.875555	0.64258	0.478541	0.323507	0.124332	13.4021	-0.0969679	0	0.985278	13.5614	-0.0868123	0	0.970405	13.7281	-0.0987943	0	0.986596	13.955	-0.0889253
O75879	PET112	16	10	1	0.956367	0.925864	0.730061	0.327473	0.117756	0.05029	0.0343648	1	0.996623	0.971622	0.743357	0.337318	0.112578	0.0302359	0.0167949	1	0.972737	0.963413	0.756447	0.347468	0.122185	0.0682006	0.0446291	1	1.00349	0.967623	0.763204	0.331304	0.10138	0.0438405	0.0253482	10.4523	-0.164318	0	0.994588	10.5448	-0.171465	0	0.997985	10.6623	-0.161575	0	0.998326	10.6044	-0.174961
O75880	SCO1	4	5	1	0.987495	0.912819	0.77594	0.331725	0.085119	0.010609	0.0126663	1	0.983551	0.941737	0.795023	0.34694	0.113999	0.0325287	0.0191352	1	0.948002	0.923666	0.747223	0.348067	0.107152	0.0374173	0.0228728	1	1.02055	0.960355	0.822686	0.36307	0.125328	0.0535087	0.0388794	10.6234	-0.1853	0	0.992768	10.7956	-0.176957	0	0.99683	10.5808	-0.168435	0	0.992342	10.9892	-0.17249
O75882	ATRN	18	9	1	1.00274	1.06624	0.964917	0.767464	0.839761	0.861833	0.633215	1	0.998355	1.02871	0.950066	0.71742	0.877301	1.00475	0.780634	1	1.02485	1.01169	0.955968	0.766555	0.812749	0.685099	0.51954	1	0.953229	1.04413	0.967995	0.795265	0.846881	0.851233	0.703018		-0.0229102	0	0.75108		-0.401232	0.845027	0.495286		-0.0363913	0	0.927681		-0.633329
O75884	RBBP9	7	7	1	0.972473	1.02585	0.910321	0.804204	0.600629	0.153925	0.0821091	1	1.01116	1.09507	0.99187	0.858877	0.694938	0.256369	0.0490882	1	1.02172	1.05552	0.973474	0.817143	0.602117	0.218064	0.12814	1	1.08233	1.02974	0.9502	0.832629	0.659989	0.201297	0.0803366	15.1108	-0.138578	0	0.973122	16.0449	-0.159757	0	0.978255	15.3349	-0.122294	0	0.986439	15.6756	-0.148756
O75886	STAM2	13	14	1	1.14653	1.18603	1.10891	0.983108	1.08053	0.727367	0.179342	1	0.977616	1.03816	0.950348	0.817249	1.02409	0.842693	0.139344	1	1.06147	1.06155	1.00603	0.847773	0.929948	0.50278	0.115283	1	1.0146	1.03669	0.993465	0.928932	0.982818	0.760933	0.141719	18.184	-1.27139	0.179342	0.904129	18.2989	-1.29981	0.139343	0.938134	17.9793	-0.191703	0	0.961447	19.0653	-0.258198
O75896	TUSC2	3	7	1	0.973301	1.24915	1.09924	0.972954	0.903367	0.811572	0.434917	1	0.948578	1.20357	1.06735	0.832471	0.798801	0.618721	0.118383	1	0.941326	1.07059	1.13023	0.793674	0.694326	0.564021	0.242773	1	0.965495	1.11583	1.12865	0.928941	0.765797	0.568867	0.142109	20.5117	-0.116728	0	0.803732	18.1145	-0.136078	0	0.873347	17.5608	-0.0766287	0	0.913886	17.7899	-0.121041
O75907	DGAT1	6	4	1	1.12044	1.11903	0.889384	0.449666	0.250028	0.192852	0.117837	1	1.12217	1.09196	0.808701	0.470483	0.245571	0.173279	0.0753559	1	1.0184	0.987688	0.767573	0.383343	0.262704	0.160241	0.0971963	1	0.92966	0.950829	0.720818	0.386642	0.161534	0.115391	0.08807	11.6949	-0.156482	0.118849	0.976699	11.7147	-0.123942	0.000178311	0.979992	11.0851	-0.129406	0.0424152	0.99768	10.7017	-0.13529
O75909-4	CCNK	8	8	1	1.01734	0.99747	0.985954	0.653696	0.417827	0.196527	0.0801493	1	1.00598	1.02797	0.958102	0.695482	0.458037	0.205771	0.0421141	1	0.99773	1.01407	1.03459	0.669709	0.421804	0.175806	0.0639497	1	0.975242	0.973733	0.980187	0.729363	0.382044	0.179699	0.0924559	13.6649	-0.118671	0	0.994353	13.98	-0.120793	0	0.98967	13.7623	-0.127178	0	0.990322	13.8551	-0.129395
O75911	DHRS3	8	4	1	0.9819	0.942176	0.826245	0.395856	0.169608	0.116385	0.0643294	1	0.996374	1.06643	0.825536	0.458592	0.235302	0.10388	0.064491	1	1.00266	0.989916	0.819006	0.372403	0.187171	0.0920788	0.0613398	1	1.00047	0.990956	0.750341	0.420658	0.188568	0.0967935	0.0646687	11.1784	-0.155263	0.0274158	0.997046	11.6213	-0.136317	0	0.995372	11.0831	-0.157535	0.0241894	0.999613	11.024	-0.137121
O75915	ARL6IP5	8	14	1	0.962368	0.947684	0.904157	0.625995	0.358573	0.147071	0.0534829	1	1.00201	1.04847	0.951096	0.634514	0.40863	0.18929	0.0592091	1	0.996084	1.01266	0.919098	0.675877	0.379232	0.159655	0.0651552	1	1.017	1.05035	0.996254	0.667882	0.409354	0.202222	0.0839218	13.0672	-0.125717	0	0.991658	13.4487	-0.119326	0	0.99179	13.4599	-0.126185	0	0.996492	13.7305	-0.119954
O75925	PIAS1	10	6	1	0.942246	0.977944	0.826373	0.39914	0.136604	0.0477587	0.0334414	1	1.00483	1.04546	0.785279	0.40635	0.205794	0.0626174	0.0586641	1	0.961158	0.959565	0.781184	0.395824	0.125347	0.0634099	0.0289039	1	0.989866	1.00078	0.875463	0.400787	0.220167	0.0583038	0.0458854	11.1578	-0.167796	0	0.996459	11.1469	-0.14537	0	0.996347	10.9429	-0.16038	0	0.996015	11.4682	-0.156933
O75928	PIAS2	4	4	1	1.00272	1.04562	0.924301	0.476699	0.18136	0.0860158	0.0466195	1	1.02729	1.0473	0.924535	0.582045	0.209122	0.0968739	0.0528381	1	1.04868	0.972187	0.845979	0.449817	0.15796	0.0737306	0.0427812	1	1.01265	1.03764	0.956273	0.52586	0.20227	0.108342	0.0482921	11.8742	-0.172003	0.0201021	0.998407	12.4572	-0.158376	0.0006354	0.997199	11.4853	-0.157784	0	0.997007	12.1981	-0.172761
O75934	BCAS2	12	9	1	0.983957	0.96102	0.84142	0.543438	0.354144	0.229409	0.158919	1	0.990152	0.986772	0.789992	0.558275	0.401926	0.308896	0.222334	1	1.0187	0.951651	0.834523	0.524169	0.359999	0.205642	0.143925	1	0.995612	0.996538	0.75981	0.472577	0.319296	0.229154	0.187375	12.6063	-0.0984612	0	0.998574	12.9657	-0.0820427	0	0.999101	12.4315	-0.101251	0	0.996699	11.6743	-0.107241
O75935	DCTN3	10	12	1	0.991416	0.987619	0.904579	0.807211	0.982769	1.11499	0.968147	1	0.999385	0.931344	0.907518	0.869541	1.1552	1.42854	1.45584	1	0.986696	0.997225	0.945939	0.905217	1.05737	0.998424	0.836166	1	1.0292	1.0148	0.943328	0.947436	1.15716	1.31425	1.30301		-0.130664	0.95554	0.0492112		0.178182	1.44944	0.918832		-0.131929	0.948623	0.118253		0.591139
O75937	DNAJC8	20	26	1	0.959055	0.986051	0.929837	0.759588	0.932099	1.09382	0.774837	1	0.990812	1.03144	0.935294	0.834526	1.05968	1.31794	1.0543	1	0.994563	1.01145	0.9595	0.831971	0.954247	0.925502	0.644655	1	1.05887	1.0507	0.991449	0.931667	1.076	1.27838	1.01975		-0.266499	0.890085	0.150666		0.43955	1.18612	0.49693			0	0.703835		0.332451
O75940	SMNDC1	18	13	1	0.989716	1.01042	0.944171	0.80855	0.976212	1.17649	0.957844	1	0.974761	1.05696	0.968746	0.803106	1.06032	1.2739	1.31508	1	1.0179	1.04646	0.957859	0.872217	1.05387	0.989009	0.82788	1	0.979002	1.00399	0.918969	0.853591	0.95714	1.1217	1.00535						0.0962264	1.31589	0.776429		-0.152703	0.935744	0.246009		-0.132261
O75943	RAD17	6	7	1	0.978306	0.937537	0.753591	0.37264	0.241307	0.216955	0.181227	1	1.00673	1.01711	0.725518	0.304265	0.149453	0.0779615	0.035927	1	1.01279	0.953587	0.8104	0.417954	0.273742	0.235621	0.200993	1	0.9871	1.03812	0.768055	0.290244	0.138762	0.0816237	0.0554937	10.7441	-0.150458	0.160817	0.996042	10.4346	-0.162375	0.00500737	0.99914	11.2239	-0.147324	0.185035	0.997703	10.4857	-0.186705
O75947	ATP5H	41	34	1	0.972825	0.934548	0.891964	0.737106	0.705694	0.586743	0.364719	1	0.99315	0.989265	0.911115	0.761875	0.824777	0.776118	0.543306	1	1.00431	1.00756	0.985402	0.820065	0.785192	0.555337	0.343123	1	1.01667	0.998031	0.929671	0.810222	0.774342	0.712587	0.503039	19.0006	-0.0488929	0	0.938517		-0.0290954	0	0.847139	18.5828	-0.0675469	0	0.970054		-0.0369785
O75949	FAM155B	1	1	1	0.782905	0.854982	0.80053	0.43272	0.234841	0.117105	0.12745	1	1.0932	0.979272	0.908882	0.360142	0.209098	0.107454	0	1	0.766636	1.01508	0.866183	0.533229	0.295331	0.0675241	0.0531413	1	0.989345	0.925506	0.900308	0.35376	0.204348	0.157556	0	11.3407	-0.122434	0	0.925409	11.3437	-0.178404	0.030649	0.987126	12.2183	-0.136718	0	0.943964	11.2605	-0.180907
O75953-5	DNAJB5	2	2	1	1.15519	1.02751	0.894407	0.437418	0.204701	0.137923	0.0639652	1	0.963414	0.965604	0.789279	0.361447	0.152647	0.0733094	0.0563519	1	0.892902	0.978802	0.735074	0.36372	0.161171	0.0793735	0.0669528	1	0.984954	0.978739	0.811867	0.328969	0.174338	0.115215	0.0769824	11.6273	-0.162349	0.0548608	0.981556	10.8918	-0.157342	0.00215864	0.998231	10.6856	-0.146752	0	0.989809	10.7953	-0.178782
O75954	TSPAN9	4	2	1	1.09338	1.00094	0.975287	0.774716	0.895569	0.926583	0.75901	1	1.02306	1.07466	0.88019	0.716442	0.854683	0.999749	0.985098	1	0.983007	1.04251	0.928129	0.688724	0.79872	0.732298	0.597695	1	0.966184	1.04099	0.939077	0.75158	0.882752	0.854771	0.893145		-0.433654	0.83897	0.67679		-0.417466	0.887232	0.383228		-0.827027	0.704359	0.876443		-0.377814
O75955	FLOT1	10	5	1	1.02665	1.04488	0.928685	0.490116	0.200817	0.133589	0.0766384	1	0.965362	1.05736	0.854079	0.43864	0.183905	0.21682	0.234275	1	1.00333	0.995977	0.822514	0.467131	0.200832	0.110124	0.0571557	1	0.89231	0.981569	0.757044	0.421194	0.169677	0.113664	0.0815614	11.9486	-0.169966	0.0633396	0.997548	11.2777	-0.176619	0.188924	0.989553	11.5659	-0.139391	0	0.999287	11.0366	-0.136293
O75962	TRIO	38	32	1	1.03785	1.02743	0.877274	0.444474	0.209111	0.126741	0.096062	1	1.00731	0.974264	0.806761	0.434873	0.210003	0.144765	0.118505	1	0.966906	1.00978	0.822467	0.442256	0.2059	0.127363	0.0866697	1	0.98185	0.981275	0.830471	0.434282	0.206488	0.141438	0.109847	11.6012	-0.15814	0.063766	0.998189	11.3301	-0.138881	0.0551082	0.999315	11.4556	-0.139828	0.0230516	0.998773	11.3999	-0.146097
O75964	ATP5L	14	15	1	1.01887	0.883798	0.777028	0.392544	0.164663	0.075445	0.0388144	1	1.00536	0.923214	0.742413	0.364368	0.126149	0.0490296	0.0333678	1	0.952755	0.971528	0.745854	0.397459	0.163202	0.0920466	0.0499165	1	0.940261	0.96752	0.680448	0.385792	0.136428	0.0530227	0.0346774	10.9426	-0.148917	0	0.989516	10.6367	-0.15919	0	0.994707	10.8591	-0.143858	0	0.99681	10.4371	-0.148952
O75976-2	CPD		1									1	0.96231	1.08756	1.1029	0.761958	0.89538	1.06029	0.572213									1	1.08131	0.984072	0.86415	0.82499	0.711133	0.728235	0.469706						0	0	0.613248						-0.0365511
O75976	CPD	64	46	1	0.972345	0.987353	0.924744	0.751935	0.773764	0.755875	0.486978	1	1.0117	1.03586	0.93471	0.77726	0.895442	0.90189	0.573033	1	1.02411	1.02498	0.962085	0.809826	0.818063	0.630657	0.388968	1	1.02083	1.05385	0.984916	0.816219	0.84591	0.821127	0.578515		-0.034146	0	0.863798		-0.0241902	0	0.641116	19.7429	-0.0580767	0	0.941322		-0.0306624
O76003	GLRX3	26	26	1	1.04879	1.01633	0.988056	0.88916	0.871088	0.42455	0.0920471	1	1.00808	1.08448	0.997328	0.852514	0.963727	0.622584	0.12291	1	1.03796	1.04303	0.979524	0.807265	0.830694	0.370555	0.0901317	1	1.0351	1.04857	0.95269	0.846212	0.851753	0.541327	0.133076	17.4533	-0.176818	0	0.982125	18.5335	-0.22415	0	0.959148	17.0482	-0.16241	0	0.956388	17.9576	-0.148323
O76021	RSL1D1	31	23	1	1.03572	0.970661	0.758401	0.300293	0.0919623	0.0491125	0.0413131	1	1.02452	0.893025	0.686	0.260141	0.0459591	0.013629	0.00918719	1	1.02344	0.960137	0.706406	0.27404	0.100783	0.0642433	0.0440968	1	0.987917	0.87736	0.686639	0.257242	0.0618415	0.0255513	0.0174771	10.4798	-0.180379	0.000683352	0.998372	9.98998	-0.194081	0	0.990781	10.1836	-0.176015	0.00788783	0.998818	9.99217	-0.187732
O76024	WFS1	20	21	1	1.32429	1.04412	0.891074	0.599587	0.400152	0.224975	0.0857311	1	1.09153	1.06574	0.921924	0.628722	0.428859	0.213798	0.0643539	1	0.99196	1.01692	0.966621	0.585937	0.393146	0.207873	0.105147	1	1.00633	1.03586	0.882588	0.578042	0.354771	0.204873	0.0762416	13.1774	-0.106978	0	0.915573	13.4826	-0.111755	0	0.980867	13.2559	-0.11226	0	0.99342	12.8375	-0.112737
O76027	ANXA9	2		1	1.11908	4.68801	1.01264	0.647227	0.530203	0.371633	0.297586									1	1.00451	1.22767	0.955284	0.420268	0.361183	0.31334	0.137817									14.2744	-0.112141	0.305866	0.0601702					11.6343	-0.192616	0.245127	0.936202
O76031	CLPX	27	29	1	1.08393	1.04887	0.838896	0.378224	0.108757	0.0475735	0.0388996	1	0.953785	0.891203	0.715438	0.312168	0.0816104	0.0364295	0.0304868	1	1.00276	0.945231	0.734584	0.3213	0.0951531	0.0493839	0.0341788	1	0.969579	0.927405	0.716687	0.302375	0.0893157	0.0393292	0.025531	11.0988	-0.17945	0	0.993318	10.2883	-0.173116	0	0.98892	10.4386	-0.171258	0	0.997456	10.2871	-0.175196
O76038	SCGN	2		1	0.922571	0.835837	0.679677	0.556239	0.34989	0.211755	0.102783									1	1.11728	0.901795	0.756777	0.506686	0.374968	0.248378	0.127327									11.4026	-0.0935184	0	0.953181					11.9949	-0.0933168	0	0.975112
O76041-2	NEBL	8	7	1	0.934666	1.02198	0.915632	0.732586	0.751546	0.769661	0.533364	1	1.03141	1.05011	0.913323	0.671426	0.772986	0.792617	0.591151	1	1.01909	1.07279	0.997782	0.827233	0.881082	0.714587	0.516104	1	1.11767	1.05055	1.01601	0.793719	0.697172	0.594744	0.525339		-0.0314126	0	0.840723		-0.741832	0.707045	0.856064		-0.0467577	0	0.904959		-0.0585773
O76054	SEC14L2	12	12	1	1.03815	1.02079	0.968685	0.854144	0.771012	0.408486	0.0715486	1	0.972047	1.07082	0.939975	0.776706	0.807548	0.581611	0.0635959	1	1.04096	1.02603	0.947459	0.809627	0.772392	0.375446	0.0671595	1	0.985928	1.0244	0.964277	0.842838	0.829298	0.553532	0.0843759	16.9219	-0.144049	0	0.970551	17.8963	-0.154695	0	0.887497	16.7559	-0.144879	0	0.955992	17.8876	-0.158689
O76061	STC2	2	2	1	1.13218	1.14888	0.839194	0.711319	0.667627	0.544972	0.331061	1	1.05033	1.22283	0.991236	0.670467	0.885595	0.790464	0.556158	1	0.982637	0.997549	1.25688	0.688596	0.788649	0.840621	0.416382	1	1.11784	1.12721	1.08242	0.742293	0.824849	0.743413	0.555024	17.6567	-0.0539179	0	0.893684		-0.0299869	0	0.629212		-0.0458797	0	0.604039		-0.0355557
O76062	TM7SF2	2	1	1	1.01403	1.20678	0.918724	0.440213	0.269225	0.259945	0.239022	1	1.0518	0.906206	0.734591	0.340081	0.0773266	0.0145904	0	1	1.0035	1.08434	0.894415	0.446374	0.33791	0.214032	0.181647	1	0.962779	0.917413	0.714949	0.319152	0.0844729	0.0472799	0.0180413	11.5337	-0.193151	0.238922	0.962255	10.456	-0.178333	0	0.988689	11.7907	-0.149272	0.182505	0.98826	10.3204	-0.171877
O76064	RNF8	2	3	1	0.988587	1.07165	0.947398	0.643842	0.325463	0.159073	0.0985029	1	1.08789	1.17096	0.918186	0.537334	0.417221	0.217639	0.138983	1	1.02577	1.07462	0.914179	0.598884	0.351065	0.159736	0.0672879	1	1.1676	1.1939	1.03629	0.657645	0.356168	0.21452	0.150426	13.1694	-0.129643	0.0101227	0.995319	13.0071	-0.106517	0.031989	0.959449	12.9536	-0.123127	0	0.992214	13.3142	-0.145394
O76070	SNCG	12	9	1	0.999517	0.98895	0.946975	0.83243	1.06937	1.26186	1.03719	1	0.956773	1.00609	0.96293	0.779591	1.07638	1.33221	1.31831	1	1.06774	1.04233	1.01006	0.885851	1.07816	1.03022	0.871645	1	1.00424	1.04578	0.973956	0.869689	1.02222	1.13956	1.09881		0.307068	1.14953	0.456277		0.854763	1.32526	0.788811		-0.0223121	0.966775	0.10176		0.0987845
O76071	CIAO1	12	9	1	0.980263	0.989559	0.808117	0.486039	0.354728	0.361037	0.252645	1	0.95174	0.997746	0.816968	0.518204	0.382783	0.379042	0.336337	1	0.988704	0.988954	0.798379	0.488826	0.338732	0.299799	0.226754	1	0.95268	0.915727	0.822977	0.511063	0.36546	0.352553	0.271385	11.9313	-0.118479	0.256001	0.993917	12.2133	-0.120202	0.324017	0.995126	11.9313	-0.111707	0.183885	0.99864	12.3458	-0.10405
O76074	PDE5A	5	2	1	0.908203	1.0741	0.89706	0.620439	0.557304	0.407302	0.130304	1	0.837413	0.976367	0.870673	0.643036	0.700359	0.495287	0.105234	1	1.00154	1.0304	0.973434	0.662557	0.591461	0.379371	0.138838	1	1.00672	1.11408	1.01267	0.737207	0.626031	0.499148	0.214282	14.5986	-0.0798589	0	0.939767	15.7399	-0.071408	0	0.816145	15.0839	-0.0851199	0	0.965648	16.4677	-0.0745898
O76075	DFFB	10	6	1	1.08821	1.18886	1.15444	0.859177	0.856151	0.479567	0.139755	1	1.04011	1.14865	0.985124	0.822021	0.905214	0.695698	0.120562	1	1.00052	1.05647	1.02364	0.757815	0.743964	0.366923	0.111821	1	1.00138	1.07682	0.987072	0.891236	0.822082	0.583622	0.142378	17.6901	-0.147826	0	0.907054	18.7848	-0.240762	0	0.913293	16.4079	-0.110943	0	0.946924	18.0908	-0.138211
O76080	ZFAND5	8	5	1	0.981095	1.0146	0.927875	0.740062	0.897144	1.02143	0.812395	1	1.02391	1.06253	0.955027	0.794206	1.09641	1.24472	1.22386	1	1.06129	1.07524	0.956963	0.820393	0.981111	0.908995	0.751265	1	1.01488	1.04256	1.00686	0.859803	1.01379	1.16042	1.09679		-0.334302	0.867758	0.397776		0.558285	1.23429	0.668617		-0.0143284	0	0.566174
O76083	PDE9A		1									1	1.01632	1.10063	0.908957	0.540723	0.375374	0.387002	0.23565									1	0.938035	0.93983	0.825743	0.506664	0.335325	0.32305	0.188675					12.6174	-0.126758	0.273299	0.976687					12.3054	-0.100569
O76094	SRP72	32	32	1	1.02323	0.968002	0.716011	0.273463	0.0848697	0.0506987	0.0257579	1	0.980856	0.939394	0.698464	0.273587	0.0818919	0.0720585	0.0652349	1	0.99982	0.972403	0.692835	0.253792	0.0928544	0.0573742	0.0336241	1	1.00052	0.965782	0.694708	0.267883	0.0958268	0.0506442	0.0436636	10.2164	-0.182356	0	0.99899	10.1093	-0.180708	0.0220919	0.996624	10.0693	-0.182581	0.00512588	0.999711	10.1186	-0.176497
O76095	JTB	1		1	0.943885	0.804968	0.788653	0.67645	0.724574	0.824646	0.498006									1	0.927996	0.844026	0.74449	0.653142	0.663682	0.675511	0.514677										-0.0450086	0.144691	0.68773						-0.0470412	0	0.92888
O77932	DXO	2	7	1	1.11736	1.03304	0.972066	0.814021	1.00116	0.91588	0.560305	1	0.940995	1.00819	0.931987	0.640632	0.589945	0.512253	0.383435	1	0.962995	1.0519	1.01368	0.801016	0.949563	0.725088	0.448673	1	0.936133	0.998082	0.830278	0.605349	0.483873	0.415106	0.309328		-0.14687	0.0756524	0.758068	16.6956	-0.0687238	0.319834	0.968547	20.4894	-0.088057	0	0.856358	14.4071	-0.0716423
O94759	TRPM2	2		1	1.06621	1.06411	0.866855	0.542409	0.310299	0.170749	0.0816005									1	1.08957	0.944448	0.725534	0.446862	0.232896	0.124005	0.0647738									12.4285	-0.119108	0	0.991459					11.0684	-0.123654	0	0.989507
O94760	DDAH1	22	21	1	1.03898	1.07886	1.002	0.882069	0.884943	0.650041	0.22683	1	0.973076	1.06268	0.966058	0.799711	0.875506	0.771204	0.259164	1	0.99555	1.01738	0.937652	0.862867	0.830346	0.537165	0.187521	1	1.04664	1.04662	0.974146	0.867362	0.886817	0.685095	0.311113	18.8095	-0.141785	0	0.955213	19.456	-0.174131	0	0.872565	17.9542	-0.121542	0	0.96198	19.3	-0.114025
O94761	RECQL4	20	13	1	0.98013	0.979623	0.737616	0.339406	0.15412	0.0819511	0.0552655	1	1.00743	0.935558	0.803124	0.374493	0.206655	0.191621	0.163291	1	1.0072	1.00468	0.762823	0.348893	0.152834	0.0881923	0.0532599	1	1.01175	0.986224	0.789668	0.371612	0.229561	0.174363	0.147492	10.605	-0.152104	0	0.999619	10.8874	-0.168005	0.147255	0.995974	10.7451	-0.156395	0.00824468	0.99982	10.8991	-0.158718
O94762	RECQL5	9	10	1	1.10206	1.05771	0.856356	0.318485	0.0939639	0.0326118	0.0196253	1	0.979415	0.977579	0.759831	0.303297	0.108288	0.0792463	0.0741765	1	1.00135	0.93618	0.734594	0.248013	0.0719722	0.0370567	0.0241042	1	1.0102	1.0136	0.749394	0.322568	0.132142	0.0785476	0.0591543	10.9158	-0.203863	0.00113842	0.991681	10.4629	-0.184366	0.0405263	0.99897	10.2033	-0.196958	0	0.997494	10.5492	-0.168192
O94763-4	URI1	1	2	1	1.29521	1.00337	0.82462	0.659889	0.462217	0.194777	0.164416	1	1.02837	0.986764	0.898081	0.618648	0.30989	0.343803	0.185797	1	0.866889	0.976522	0.836302	0.602895	0.378852	0.310231	0.15642	1	1.06333	1.02293	1.07397	0.587248	0.420486	0.364428	0.133967	13.5437	-0.0946627	0	0.912011	13.0089	-0.113811	0.159176	0.986073	13.1792	-0.0896478	0	0.970688	13.4674	-0.121991
O94763	URI1	16	14	1	0.898656	0.960725	0.838056	0.604182	0.504826	0.274559	0.13396	1	0.965027	0.988226	0.859959	0.652918	0.540709	0.336293	0.136546	1	0.972134	1.04877	0.963725	0.711501	0.548494	0.293237	0.154421	1	0.973069	0.99776	0.904356	0.694748	0.538205	0.338634	0.148562	13.5803	-0.0874091	0	0.963796	14.3214	-0.0835503	0	0.973225	14.8283	-0.0950047	0	0.987011	14.7099	-0.0870539
O94766	B3GAT3	6	8	1	1.01331	0.991082	0.835761	0.499247	0.251719	0.0758146	0.0541917	1	1.04935	0.996617	0.912293	0.520397	0.330321	0.229125	0.15587	1	0.979686	1.04274	0.896826	0.508792	0.246215	0.108229	0.0420747	1	1.00335	1.03397	0.926616	0.547066	0.362923	0.247773	0.162213	11.8437	-0.137481	0	0.996617	12.3981	-0.127864	0.124851	0.995604	12.1108	-0.143569	0	0.997452	12.7461	-0.11937
O94768	STK17B	3	3	1	0.992494	0.969394	0.777129	0.369471	0.130567	0.0169524	0.0149251	1	1.09569	0.963201	0.846123	0.400275	0.137055	0.0966776	0.049093	1	0.94617	1.00248	0.841194	0.404995	0.13844	0.039292	0.0172477	1	1.03551	1.0558	0.937576	0.407438	0.186752	0.102879	0.0233452	10.8182	-0.170097	0	0.996707	11.2321	-0.167225	0.0170593	0.992101	11.2419	-0.173063	0	0.996896	11.575	-0.188129
O94776	MTA2	46	38	1	1.00371	1.00872	0.8846	0.620007	0.37968	0.111882	0.028566	1	1.02217	0.983389	0.876687	0.610811	0.458228	0.229225	0.0744184	1	1.01203	0.988874	0.867593	0.6067	0.393766	0.136943	0.0431926	1	1.01752	1.02855	0.90721	0.631521	0.445992	0.220065	0.078381	13.0116	-0.129291	0	0.988332	13.3994	-0.102503	0	0.984351	12.9578	-0.120075	0	0.987496	13.5494	-0.107246
O94782	USP1	8	10	1	0.968996	0.968235	0.83339	0.571833	0.481251	0.498482	0.393724	1	1.05496	1.08384	0.906817	0.578706	0.39485	0.29053	0.257801	1	0.982075	1.00843	0.912181	0.658796	0.526984	0.450906	0.349627	1	0.976307	0.950146	0.848418	0.53599	0.353376	0.248468	0.195822	14.3226	-0.0944639	0.402832	0.987101	12.9762	-0.114773	0.214527	0.987718	15.4143	-0.0746515	0.252275	0.99464	12.5414	-0.10203
O94788	ALDH1A2		4									1	0.970718	0.965125	0.862681	0.790607	1.00927	1.18097	1.20714									1	0.983767	0.931328	0.930283	0.82646	0.998888	1.03411	1.00849						0.0842041	1.20795	0.538942						-0.206516
O94804	STK10	30	20	1	1.01779	1.14646	0.975045	0.783243	0.800398	0.353526	0.0492305	1	1.00079	1.04474	0.949633	0.740239	0.785996	0.481245	0.052116	1	1.02833	1.03938	0.954266	0.770226	0.709209	0.251321	0.0586081	1	1.03494	1.04237	0.975188	0.76808	0.67542	0.322826	0.06715	16.8032	-0.163831	0	0.931774	17.1339	-0.132368	0	0.900454	15.8936	-0.137893	0	0.955831	15.7953	-0.1146
O94808	GFPT2	9	10	1	1.1964	1.15864	0.941053	0.525904	0.273618	0.150317	0.107282	1	1.01619	1.00142	0.81376	0.407741	0.190318	0.108439	0.0742693	1	1.06172	1.00059	0.802742	0.383207	0.203577	0.151228	0.0704515	1	1.03203	0.997323	0.801198	0.40418	0.199383	0.0876707	0.0775593	12.3017	-0.150692	0.0780582	0.955628	11.2323	-0.147423	0.020338	0.999755	11.0909	-0.148456	0.0487133	0.99578	11.1936	-0.143236
O94811	TPPP	4	4	1	1.00907	1.03518	0.981667	0.77318	0.962447	0.967077	0.690228	1	0.990522	1.08153	0.975073	0.692357	0.796669	0.714621	0.390939	1	1.06701	1.0872	1.04572	0.982809	1.09206	0.950789	0.601803	1	1.01968	1.04472	0.981301	0.780826	0.821353	0.676829	0.427331		-0.0154252	0	0.443424		-0.0437116	0	0.822522		-0.512182	0.6018	0.872615	20.949	-0.0485486
O94812	BAIAP3	2		1	1.03835	0.976757	0.791997	0.522828	0.198363	0.0381788	0.00449817									1	1.05736	0.952427	0.877397	0.388434	0.12141	0.0579777	0.0424668									11.6651	-0.148489	0	0.986635					11.2711	-0.185886	0.0122583	0.996094
O94817	ATG12	6	5	1	0.996959	0.997164	0.885034	0.5199	0.221256	0.0772864	0.0343348	1	1.01016	1.04678	0.912737	0.665793	0.295366	0.117118	0.0672856	1	1.02361	1.04823	0.911862	0.568842	0.242949	0.0958332	0.045766	1	1.00256	1.01682	0.842915	0.630739	0.26603	0.135263	0.0765538	12.0595	-0.151806	0	0.998784	13.0863	-0.142221	0	0.996067	12.4341	-0.149297	0	0.997202	12.6576	-0.128744
O94819	KBTBD11	7	5	1	0.96636	1.04854	0.936029	0.604073	0.338288	0.177013	0.0998727	1	1.05823	1.0816	1.01415	0.700234	0.346641	0.167283	0.0965205	1	0.994019	1.00415	0.981085	0.681603	0.347007	0.170179	0.0955508	1	0.964942	0.943256	0.992499	0.687238	0.34189	0.174447	0.111823	13.0333	-0.120421	0	0.996143	13.5339	-0.14295	0.0423538	0.990352	13.4691	-0.132846	0.0180592	0.999561	13.4391	-0.140161
O94826	TOMM70A	49	50	1	1.01213	0.977186	0.91851	0.614251	0.250302	0.036592	0.0109644	1	0.999567	1.03034	0.904757	0.618987	0.279766	0.0654198	0.0168109	1	1.02479	1.02673	0.936001	0.633843	0.243818	0.0654594	0.0208696	1	1.038	1.03453	0.947719	0.65074	0.288024	0.0885935	0.0261933	12.6655	-0.170191	0	0.995166	12.7467	-0.155492	0	0.994485	12.7836	-0.169317	0	0.997573	13.0028	-0.15706
O94827-6	PLEKHG5	1	1	1	0.93486	0.916375	0.549118	0.240128	0.0417079	0.0586446	0.0706806	1	1.34697	0.932696	1.11465	0.508218	0.385193	0.251408	0.239209	1	0.972423	0.97947	0.773034	0.289838	0.135749	0.0519538	0	1	0.873787	0.96245	0.721422	0.429313	0.245522	0.143418	0.144053	9.24699	-0.169786	0	0.991232	12.0713	-0.291916	0.286535	0.882392	10.5487	-0.179348	0	0.998138	11.0586	-0.115074
O94829	IPO13	7	2	1	1.03189	1.02299	0.820461	0.447105	0.239203	0.154373	0.0536177	1	1.07389	1.09869	0.929911	0.524507	0.22856	0.145687	0.0586834	1	1.04998	1.07988	0.894385	0.480843	0.264016	0.124691	0.0741937	1	1.06846	0.989258	0.970993	0.562027	0.24119	0.0985653	0.056304	11.5887	-0.130093	0	0.997084	12.2186	-0.15254	0.0342476	0.987993	12.0093	-0.139362	0.0194949	0.991846	12.4806	-0.161952
O94830	DDHD2	9	8	1	0.995717	1.04417	0.937597	0.582083	0.431605	0.339946	0.247439	1	1.04338	1.07521	0.950924	0.54	0.307887	0.175493	0.105027	1	0.979272	1.01256	0.879435	0.617722	0.412991	0.301308	0.220432	1	1.04424	1.1045	1.0416	0.577613	0.284994	0.166471	0.118718	13.3215	-0.109111	0.228385	0.991923	12.5254	-0.138282	0.070646	0.99142	13.5625	-0.0905083	0.0664677	0.998806	12.5988	-0.179605
O94832	MYO1D	17	20	1	1.03535	1.16064	0.82894	0.370895	0.148698	0.0900186	0.0627152	1	1.02799	1.0212	0.811386	0.339554	0.0951842	0.0498809	0.0329024	1	0.999399	1.00409	0.798338	0.361845	0.14487	0.08685	0.0548907	1	1.00195	1.00809	0.780162	0.323953	0.0989186	0.0423016	0.0353531	11.0522	-0.174739	0.0379099	0.981663	10.8325	-0.183037	0	0.998714	10.912	-0.163584	0.0166379	0.999873	10.6558	-0.179902
O94842	TOX4	13	10	1	0.96411	0.962084	0.805164	0.430082	0.296507	0.24527	0.160199	1	0.968953	1.0443	0.823334	0.460169	0.356664	0.317746	0.249615	1	1.00551	1.00469	0.816053	0.448396	0.301233	0.219306	0.150888	1	1.05053	0.999061	0.793857	0.486733	0.353122	0.284612	0.247221	11.4635	-0.126835	0.135858	0.9951	11.6695	-0.134902	0.259493	0.9935	11.6457	-0.124242	0.108504	0.998471	11.9029	-0.112874
O94851-4	MICAL2	6		1	1.17542	1.25896	1.0271	0.439061	0.224261	0.165076	0.110904									1	1.02017	0.975966	0.779321	0.341937	0.154885	0.104595	0.0915478									11.7785	-0.270852	0.153326	0.937536					10.7157	-0.168702	0.0572709	0.999306
O94851	MICAL2		4									1	0.995781	0.990776	0.816711	0.409207	0.243015	0.130252	0.0626779									1	0.887878	0.91943	0.745836	0.354573	0.207534	0.109135	0.0441991					11.3908	-0.132982	0	0.998535					10.7438	-0.138313
O94854	KIAA0754	6	3	1	1.0054	0.970879	0.8117	0.433832	0.254444	0.188792	0.141769	1	0.98966	0.981168	0.810564	0.383029	0.167829	0.0720814	0.0407863	1	1.02021	1.05514	0.863177	0.424196	0.277965	0.184805	0.105828	1	0.938775	0.951363	0.761896	0.337484	0.162844	0.0931928	0.0616837	11.4104	-0.134154	0.0971612	0.999312	11.0841	-0.156621	0	0.999627	11.5859	-0.14483	0.0998436	0.993622	10.6889	-0.15544
O94855-2	SEC24D	33	26	1	0.987476	1.00785	0.93528	0.673431	0.374555	0.16173	0.0912952	1	1.02572	1.04791	0.927502	0.733547	0.446382	0.14464	0.0698793	1	1.02047	1.04879	0.985442	0.72201	0.403271	0.154948	0.0985342	1	1.03851	1.06488	1.00661	0.81916	0.457681	0.141011	0.065445	13.4742	-0.124012	0	0.998549	14.0049	-0.12991	0	0.990133	13.8706	-0.130031	0	0.99608	14.4694	-0.149776
O94864	SUPT7L	7	1	1	0.986456	1.06059	0.909196	0.691762	0.718698	0.742454	0.484369	1	0.845407	1.01129	0.750569	0.702471	0.748459	0.925969	0.453625	1	0.914941	0.993571	0.874193	0.625846	0.659347	0.550767	0.35086	1	0.989992	1.08979	0.961243	1.09152	0.704254	0.698602	0.635784		-0.0375915	0.198686	0.858783					17.6559	-0.0515068	0	0.923413		-0.398426
O94868	FCHSD2	2	3	1	0.985148	1.00819	0.905875	0.640802	0.239146	0.0803179	0.0658242	1	1.02315	1.09901	0.968379	0.709108	0.335658	0.0977696	0.0324035	1	0.963741	1.05783	1.00145	0.69285	0.297076	0.087547	0.0550049	1	1.07439	1.04867	0.992152	0.775613	0.402364	0.0932184	0.0356887	12.78	-0.156731	0	0.996538	13.4462	-0.155683	0	0.990762	13.2722	-0.161901	0	0.995504	13.9843	-0.159508
O94874	UFL1	42	38	1	0.991795	0.924312	0.739093	0.288857	0.0744577	0.0293003	0.0244522	1	0.993717	0.942018	0.73424	0.316291	0.0853217	0.0466671	0.0390547	1	0.984117	0.965538	0.732833	0.291401	0.0852851	0.0419996	0.0309012	1	0.991879	0.931061	0.75097	0.31195	0.096502	0.0529338	0.0336421	10.3319	-0.186652	0	0.995635	10.4113	-0.173938	0	0.996914	10.336	-0.181311	0	0.998808	10.4808	-0.174503
O94876	TMCC1	4	3	1	0.992715	1.0487	0.8213	0.367238	0.217579	0.14295	0.100672	1	0.907514	0.962368	0.746576	0.373419	0.203406	0.134613	0.129286	1	1.00446	0.963343	0.820553	0.375246	0.179835	0.120144	0.0977301	1	1.05044	1.06514	0.754788	0.393774	0.242813	0.169999	0.076444	11.0343	-0.164615	0.0924738	0.996944	10.7686	-0.14384	0.0697191	0.990862	11.0307	-0.164685	0.0680251	0.99905	11.0757	-0.132232
O94885	SASH1	10	9	1	1.01048	1.11096	0.94777	0.654462	0.479636	0.270269	0.154917	1	0.983825	1.07866	0.956396	0.622753	0.453472	0.264738	0.175952	1	0.998375	1.04611	0.9378	0.677679	0.449355	0.256298	0.134545	1	1.02103	1.13014	1.05309	0.698445	0.452953	0.281785	0.175298	14.1323	-0.09609	0	0.981609	13.8497	-0.0975181	0.0278002	0.987193	14.0224	-0.101627	0	0.995425	14.2149	-0.113613
O94886	TMEM63A		1									1	0.993572	1.29735	1.04582	0.610016	0.437531	0.322667	0.139744									1	1.04732	1.03878	0.962107	0.528184	0.322729	0.154832	0.110411					13.7713	-0.110924	0.111256	0.904702					12.5037	-0.139833
O94887	FARP2	8	3	1	1.15514	1.21892	0.90995	0.33544	0.163601	0.0801322	0.0570244	1	0.963653	0.880664	0.674032	0.210214	0.0596402	0.0364753	0.0450683	1	0.976023	0.884915	0.660034	0.277343	0.112533	0.0729407	0.0467551	1	0.986681	0.880892	0.647375	0.222489	0.075891	0.0465881	0.0385159	11.1332	-0.216734	0.0664182	0.958282	9.83488	-0.197336	0.00322339	0.989282	9.92509	-0.157375	0	0.992384	9.73363	-0.180479
O94888	UBXN7	24	22	1	0.978266	1.00002	0.916121	0.800108	0.925042	0.933105	0.513775	1	0.992882	1.05723	0.974825	0.761424	0.957108	1.03927	0.668079	1	1.03	1.03596	1.00658	0.877312	0.998181	0.825842	0.451738	1	1.00725	0.989708	0.919793	0.76987	0.826646	0.862615	0.5911		-0.178696	0	0.714871		-0.0143289	0	0.305886	20.1703	-0.183713	0.40862	0.936732		-0.0237342
O94889	KLHL18	3	2	1	0.866453	1.09544	0.864824	0.558787	0.331585	0.0326899	0.0140382	1	1.03307	1.09372	1.0157	0.696484	0.486243	0.247843	0.130628	1	0.952601	0.973575	0.929203	0.666443	0.41788	0.11545	0.0429641	1	1.06242	1.17523	1.01283	0.708306	0.496777	0.243086	0.125979	12.4201	-0.142231	0	0.963019	14.369	-0.106682	0	0.982963	13.493	-0.131614	0	0.986498	14.4486	-0.108109
O94898	LRIG2	5	3	1	1.02472	1.06196	0.87255	0.518335	0.253689	0.119923	0.0803318	1	1.02923	1.00418	0.898952	0.496299	0.349203	0.309136	0.210903	1	0.928255	0.934343	0.806317	0.466927	0.246737	0.13726	0.0834647	1	0.933165	0.95326	0.792658	0.523717	0.338948	0.26022	0.207249	12.1236	-0.133293	0	0.995968	12.1569	-0.13635	0.228796	0.994484	11.5948	-0.124273	0	0.991706	12.2865	-0.0942864
O94901-9	SUN1	8	5	1	1.01374	1.07533	0.814325	0.440712	0.319237	0.230327	0.134793	1	1.02009	0.99803	0.823248	0.434755	0.217416	0.104206	0.0511237	1	0.984023	0.958204	0.808822	0.429383	0.299239	0.255396	0.552476	1	1.00607	1.00419	0.857657	0.434313	0.233246	0.1238	0.0552623	11.6672	-0.124312	0.110503	0.989468	11.4525	-0.140346	0	0.999264	10.6389	-0.226059	0.372852	0.920836	11.6177	-0.140372
O94903	PROSC	17	18	1	1.00287	0.973924	0.917421	0.6704	0.332056	0.0704363	0.0386361	1	0.998578	1.05523	0.95798	0.654622	0.407378	0.184834	0.114156	1	0.998329	0.983818	0.914515	0.695972	0.333205	0.101959	0.04353	1	1.02558	1.03895	0.939211	0.712569	0.397689	0.173402	0.1026	13.176	-0.150495	0	0.993357	13.5964	-0.115363	0	0.994842	13.3357	-0.147234	0	0.99545	13.7879	-0.122854
O94905	ERLIN2	14	12	1	1.05331	0.999209	0.756984	0.329211	0.117079	0.0877683	0.0664817	1	0.983519	0.912184	0.730105	0.266314	0.0770278	0.0614924	0.0599066	1	0.986974	0.930777	0.690793	0.27006	0.108463	0.0829176	0.0564253	1	0.967749	0.925287	0.709341	0.249425	0.090711	0.0705612	0.0538186	10.5742	-0.171178	0.0287201	0.997395	10.2119	-0.191062	0.0222268	0.993902	10.0891	-0.171652	0.0190706	0.997073	10.0878	-0.191338
O94906	PRPF6	38	21	1	1.02156	0.95958	0.708673	0.219935	0.0679243	0.0516021	0.0432577	1	0.990047	0.903683	0.656372	0.215954	0.0510914	0.0489306	0.0451542	1	0.981582	0.911336	0.662531	0.202758	0.0798855	0.052197	0.0427501	1	0.981256	0.898784	0.637107	0.199111	0.0619048	0.0467686	0.0392498	9.99724	-0.212054	0.0232425	0.99861	9.77124	-0.193566	0.00355416	0.99364	9.77809	-0.200294	0.0177059	0.994932	9.65315	-0.191185
O94907	DKK1	1		1	0.944931	1.00565	0.940178	0.565921	0.508165	0.49842	0.278891									1	1.05879	1.06246	0.916947	0.609137	0.389197	0.341923	0.255486									14.0898	-0.0974391	0.337996	0.94912					13.2531	-0.111877	0.229398	0.989162
O94910	LPHN1	1	1	1	1.06233	1.31493	1.01751	0.532089	0.384092	0.48728	0.310017	1	0.964559	0.982747	0.842493	0.463631	0.218428	0.13387	0.0701552	1	0.850447	1.01115	0.868579	0.566091	0.334792	0.280742	0	1	1.04108	1.12972	0.964534	0.528543	0.218404	0.121481	0.0898603	12.0362	-1.42031	0.393796	0.879966	11.6801	-0.134635	0	0.998606	12.7216	-0.112431	0	0.952895	12.2093	-0.179726
O94913	PCF11	28	10	1	1.01321	1.00342	0.845956	0.379935	0.211276	0.156359	0.101066	1	0.991361	1.0312	0.866531	0.373201	0.222621	0.209747	0.144726	1	1.01688	1.03429	0.860965	0.379581	0.210329	0.148091	0.103869	1	1.05626	1.06498	0.847156	0.389423	0.21973	0.194104	0.17609	11.1542	-0.168138	0.0995609	0.999003	11.0875	-0.189362	0.164108	0.997626	11.1889	-0.175002	0.103508	0.998067	11.0953	-0.179493
O94915-2	FRYL	1		1	1.09085	1.14473	0.877454	0.356104	0.162551	0.0588331	0.0634397									1	1.05823	1.09913	0.794956	0.277825	0.167483	0.14536	0.0887652									11.1483	-0.192468	0.04404	0.980941					10.4471	-0.212878	0.110601	0.989403
O94915	FRYL	36	41	1	1.06001	0.989028	0.739817	0.27639	0.110731	0.100315	0.0819718	1	0.989242	0.916366	0.703992	0.247345	0.071272	0.0506288	0.0461295	1	0.982841	0.9249	0.676786	0.245728	0.118044	0.0876906	0.0746247	1	0.998203	0.946046	0.696729	0.239256	0.0822908	0.0533461	0.0385249	10.2654	-0.19589	0.0639491	0.997032	10.0636	-0.189921	0.00814243	0.995145	9.93866	-0.183679	0.0464684	0.996323	10.025	-0.191603
O94916-5	NFAT5	9	3	1	0.941566	0.999769	0.861911	0.531883	0.278086	0.155952	0.120005	1	1.0002	1.08266	0.895348	0.449595	0.184824	0.0521611	0.0151729	1	1.01486	1.07911	0.903035	0.587236	0.325963	0.174527	0.115927	1	1.03687	1.04638	0.928766	0.537641	0.223747	0.0667942	0.0234245	12.2371	-0.121687	0.0156218	0.996469	11.6888	-0.16959	0	0.994425	12.8344	-0.117556	0.00389216	0.99379	12.2587	-0.162925
O94919	ENDOD1	18	16	1	1.12451	1.07684	1.0265	0.79989	0.651735	0.496227	0.315939	1	1.01162	1.04502	0.960821	0.701554	0.573886	0.520404	0.345736	1	1.04864	1.00076	0.922625	0.685272	0.540677	0.393304	0.254001	1	1.10399	1.08896	0.948226	0.75233	0.591356	0.496487	0.390484	17.3366	-0.0687513	0	0.954639	16.7357	-0.0650314	0.187132	0.977306	15.2528	-0.0732431	0	0.991977	17.1786	-0.0659349
O94923	GLCE	4	8	1	0.997045	1.12426	0.92186	0.538509	0.253373	0.101943	0.0947087	1	1.10175	1.00794	0.868317	0.453117	0.172212	0.0496758	0.0287135	1	0.985539	0.994175	0.920829	0.538503	0.26262	0.102704	0.0546973	1	0.96663	0.981182	0.895205	0.445049	0.170231	0.0658169	0.0304148	12.3048	-0.148866	0.0322348	0.987427	11.5972	-0.164948	0	0.992137	12.3508	-0.143328	0	0.999158	11.6462	-0.168239
O94925-3	GLS	3	2	1	1.01325	0.935819	0.794997	0.374445	0.0869545	0.00882529	0.00166216	1	1.0093	1.01678	0.829973	0.473352	0.178075	0.0384585	0.04238	1	0.934169	0.919016	0.757529	0.36544	0.0836609	0.0173668	0.00759961	1	0.950635	1.11849	0.849851	0.411343	0.158639	0.0397176	0.0271509	10.8621	-0.18288	0	0.993328	11.5553	-0.155861	0	0.996136	10.6558	-0.175826	0	0.987699	11.3369	-0.170002
O94925	GLS	30	24	1	1.00541	0.971734	0.817188	0.423498	0.179322	0.0957901	0.0768879	1	0.984205	0.939798	0.80296	0.40468	0.170863	0.0803498	0.0688257	1	0.974144	0.960811	0.784488	0.401297	0.174327	0.0969002	0.0700598	1	0.983414	0.933327	0.779132	0.405763	0.167643	0.0862914	0.078092	11.2984	-0.145914	0.00694116	0.999231	11.1405	-0.147724	0	0.997034	11.0687	-0.143123	0	0.99844	11.0364	-0.142992
O94927	HAUS5	24	20	1	0.99492	1.08811	0.83647	0.47002	0.382894	0.380259	0.119387	1	1.03615	1.0565	0.856742	0.517817	0.416224	0.444825	0.102959	1	1.00047	1.01177	0.84375	0.486069	0.385017	0.364623	0.115485	1	1.03498	1.01585	0.901643	0.52092	0.399517	0.404142	0.141053	12.3828	-0.10334	0.126275	0.958582	13.2964	-0.0841359	0	0.943099	12.7163	-0.0904904	0	0.972453	13.0897	-0.0959008
O94941	UBOX5	5	2	1	1.02814	1.03417	0.91809	0.683963	0.492543	0.24609	0.102469	1	1.04284	1.02759	0.974353	0.7328	0.714396	0.431403	0.121689	1	0.981381	1.06802	0.951707	0.66636	0.465189	0.249324	0.106005	1	1.0413	1.09428	1.06134	0.753259	0.615249	0.390342	0.080722	14.1382	-0.103161	0	0.988316	16.3053	-0.0912262	0	0.938802	14.0058	-0.104898	0	0.988594	15.6525	-0.101756
O94952	FBXO21	13	8	1	0.995019	1.05332	0.808238	0.426433	0.199831	0.111096	0.0759129	1	1.02249	0.996861	0.783667	0.378318	0.144741	0.0709883	0.0480899	1	0.97731	0.999576	0.817135	0.415882	0.190692	0.101989	0.0687171	1	0.997848	0.976541	0.83139	0.359508	0.169094	0.0810701	0.0481566	11.3337	-0.141883	0.011996	0.997138	10.9283	-0.157127	0	0.999289	11.2941	-0.145272	0.0072934	0.999552	11.0472	-0.167169
O94953	KDM4B	7	7	1	0.933329	0.911695	0.72068	0.342547	0.133987	0.0767567	0.0462132	1	1.03864	1.01156	0.829767	0.397168	0.139675	0.0505853	0.0334705	1	0.926144	0.859881	0.726485	0.330339	0.142167	0.0835266	0.0544674	1	0.987345	0.976886	0.83098	0.382787	0.139188	0.0669892	0.0475576	10.4713	-0.152331	0	0.991078	11.1723	-0.168069	0	0.998346	10.4348	-0.148916	0	0.981238	11.1186	-0.166307
O94955	RHOBTB3	7	9	1	1.05749	1.08749	0.858066	0.422825	0.191882	0.106262	0.0796331	1	1.00436	1.00853	0.840729	0.350888	0.139163	0.0734005	0.0577861	1	0.947809	0.94378	0.755467	0.335347	0.164665	0.0859316	0.037317	1	1.00581	1.02608	0.786424	0.351113	0.147444	0.0825143	0.0463059	11.4328	-0.160111	0.0439956	0.991805	10.9905	-0.182727	0.0331536	0.999896	10.6679	-0.153126	0	0.995705	10.8401	-0.162848
O94964-2	SOGA1	11	11	1	0.965688	0.975391	0.785553	0.353732	0.144312	0.0982484	0.0675401	1	0.947293	0.911869	0.7064	0.257079	0.100087	0.0707449	0.06714	1	1.00306	0.984399	0.755256	0.324686	0.155806	0.0925696	0.0799693	1	0.983565	0.961627	0.692872	0.261622	0.109996	0.0681581	0.0476856	10.8099	-0.163669	0.0302224	0.998591	10.0949	-0.18561	0.0317516	0.992351	10.575	-0.166607	0.0439688	0.999892	10.0889	-0.177848
O94966-6	USP19	41	34	1	1.01975	1.05391	0.927721	0.561926	0.278959	0.122254	0.0666192	1	1.02247	1.043	0.932554	0.591279	0.341623	0.19953	0.13509	1	1.0145	1.02644	0.91377	0.56924	0.286129	0.115069	0.0572598	1	1.01251	1.01461	0.931043	0.60506	0.335252	0.182673	0.126547	12.5463	-0.13783	0	0.996932	12.9403	-0.12109	0.0567219	0.997142	12.5575	-0.1375	0	0.99835	12.9883	-0.121684
O94967	WDR47	15	9	1	1.01851	1.03742	0.947602	0.709779	0.447316	0.105358	0.0510561	1	1.02962	1.09775	0.98178	0.680615	0.448516	0.158563	0.0460301	1	1.02147	0.998772	0.947445	0.743051	0.468087	0.133988	0.0628572	1	0.997053	0.980192	0.915786	0.647344	0.42956	0.136269	0.0392251	13.8437	-0.13642	0	0.987518	13.8169	-0.127432	0	0.98237	14.1404	-0.133739	0	0.990619	13.4315	-0.124904
O94972	TRIM37	5	1	1	1.14092	1.1688	0.913818	0.416109	0.14679	0.0705551	0.0436515	1	1.07659	1.14149	0.833469	0.495944	0.483045	0.129325	0.140963	1	1.00887	0.978726	0.793202	0.317729	0.110566	0.0677431	0.0493958	1	1.00484	0.916035	0.891321	0.635246	0.447304	0.196484	0.0995534	11.5204	-0.191438	0.028602	0.971482	12.6337	-0.101954	0	0.946893	10.6731	-0.182793	0.0203289	0.999588	13.4915	-0.105822
O94973	AP2A2	30	20	1	0.990589	0.969809	0.905477	0.571427	0.264824	0.081571	0.0456892	1	1.00332	1.06421	0.933667	0.627445	0.361848	0.13969	0.0811309	1	1.00965	1.05055	0.930906	0.620506	0.294809	0.0906687	0.0485177	1	1.003	1.03272	0.916965	0.650696	0.344699	0.129204	0.0608458	12.4687	-0.14673	0	0.997349	13.1576	-0.126309	0	0.994134	12.855	-0.146975	0	0.99626	13.1703	-0.13273
O94979	SEC31A	46		1	1.04038	1.08475	0.945347	0.593917	0.285708	0.125689	0.0632634									1	1.01262	1.03631	0.92343	0.594334	0.34009	0.12539	0.0632382									12.7603	-0.140134	0	0.992911					12.87	-0.130111	0	0.995923
O94985-2	CLSTN1	8	10	1	0.822718	0.913488	0.733571	0.525748	0.477969	0.316139	0.192169	1	1.01241	1.03664	0.92487	0.664955	0.496359	0.304307	0.0926546	1	0.979082	1.05894	1.05154	0.813637	0.643016	0.465226	0.333702	1	1.01449	1.00169	0.987528	0.723751	0.510942	0.284772	0.11848	12.6357	-0.0780171	0	0.925818	14.1991	-0.0972501	0	0.98334	17.1023	-0.0746448	0.121552	0.980234	14.6523	-0.10342
O94986	CEP152		4									1	0.930654	1.04233	1.15187	0.678039	0.298042	0.17067	0.0900235									1	0.973197	0.933442	1.03065	0.841938	0.473573	0.17986	0.13548					13.1665	-0.18036	0.100723	0.971658					14.6581	-0.145076
O94988	FAM13A	1		1	0.954507	1.00129	1.00139	0.335689	0.374838	0.255603	0.193317									1	0.961161	1.18099	0.823814	0.508583	0.248687	0.180236	0.266595									11.1738	-0.38819	0.273206	0.981047					11.7037	-0.14196	0.179229	0.958292
O94992	HEXIM1	22	18	1	0.991276	1.04213	0.941735	0.785812	0.935308	1.11457	0.939832	1	0.992744	1.05843	0.990607	0.780292	0.85385	0.918231	0.886107	1	1.00698	1.0405	0.974919	0.836564	0.980332	0.917463	0.773564	1	1.01672	1.00984	0.949037	0.793799	0.777807	0.821861	0.704585		-0.189894	0.943451	0.127834		-0.3594	0.85962	0.764218		-0.0132603	0	0.580355		-0.0630097
O95049-2	TJP3		10									1	0.983184	1.00335	0.905901	0.532749	0.295032	0.186549	0.095615									1	0.976509	1.03171	0.88345	0.534616	0.312397	0.175419	0.0889697					12.4291	-0.125279	0.0295585	0.998575					12.4543	-0.11873
O95049-4	TJP3	12		1	0.954905	0.955148	0.84836	0.4952	0.274707	0.121126	0.0647588									1	0.976484	0.979652	0.888503	0.571417	0.293991	0.119602	0.0685027									11.9513	-0.128561	0	0.995278					12.5256	-0.131095	0	0.997724
O95057	DIRAS1	10	7	1	0.996251	0.97411	0.808953	0.425424	0.179404	0.0705901	0.0501754	1	0.966407	0.989577	0.845868	0.47058	0.317321	0.271024	0.217945	1	1.01794	0.946516	0.78005	0.400241	0.181907	0.0813017	0.0487496	1	0.916011	0.991898	0.845067	0.463969	0.295352	0.219823	0.183944	11.2642	-0.149387	0	0.99884	11.7707	-0.134291	0.204729	0.997889	11.0383	-0.145511	0	0.997583	11.7237	-0.134309
O95059	RPP14	4	6	1	1.2184	1.13336	1.02818	0.75603	0.791725	0.867502	0.554618	1	1.04947	1.06324	0.820723	0.644683	0.661235	0.753094	0.569924	1	1.0246	0.981763	0.834821	0.623228	0.636085	0.561872	0.354048	1	0.972183	1.01958	0.805921	0.604645	0.582151	0.593717	0.505585		-0.0297966	0	0.639977		-1.03687	0.657234	0.912296	17.6388	-0.0509201	0	0.951751		-0.103723
O95067	CCNB2	11	10	1	1.01869	0.942745	0.770608	0.332669	0.109784	0.0611891	0.0467631	1	1.05037	0.977116	0.755691	0.335022	0.120524	0.0555664	0.0618212	1	0.952196	0.97529	0.735734	0.316269	0.131022	0.0690342	0.0522544	1	0.970714	0.95122	0.71527	0.300673	0.106523	0.0800018	0.0414854	10.6523	-0.168833	0	0.997397	10.6143	-0.164778	0.00212449	0.99735	10.4803	-0.162788	0.00397797	0.997982	10.3144	-0.16499
O95070	YIF1A	1	1	1	1.03519	1.07123	0.894562	0.484365	0.16892	0.0636366	0.0294466	1	1.08173	1.24872	0.873534	0.582483	0.308514	0.16441	0.110161	1	1.00086	1.00436	0.829869	0.497781	0.252094	0.08915	0.0328117	1	1.00209	1.14909	1.0635	0.648437	0.334507	0.131313	0.162942	11.8297	-0.168224	0	0.995249	12.6844	-0.119277	0	0.948166	11.8221	-0.137389	0	0.996291	13.085	-0.167085
O95071	UBR5	78	62	1	0.98108	0.968178	0.804224	0.377311	0.125001	0.0588766	0.0440817	1	0.996124	0.986433	0.831971	0.398913	0.144863	0.0657336	0.0470505	1	1.00711	0.996213	0.821688	0.382995	0.131742	0.0678713	0.0477591	1	1.0062	0.983618	0.809775	0.393988	0.146284	0.0728076	0.0487221	10.9723	-0.165816	0	0.998579	11.1976	-0.163116	0	0.999691	11.0805	-0.165557	0	0.999676	11.0955	-0.158326
O95081	AGFG2	6	3	1	1.03883	1.03642	0.919643	0.781225	0.858865	0.98371	0.73053	1	1.07497	1.12156	1.04507	0.811176	1.06105	1.35028	1.14984	1	1.00404	1.06756	0.968496	0.797726	0.924459	0.857666	0.688376	1	1.04026	1.03424	1.01426	0.787678	0.981892	0.988339	0.947832		-0.426375	0.838582	0.595181		0	1.25006	0.510954		-0.0198018	0	0.719451		-0.036548
O95096	NKX2-2	1		1	0.980788	4.10136	0.752941	0.572778	0.931548	1.12802	1.11915									1	0.960423	0.970147	1.09193	0.897726	1.03382	1.17118	1.01241										-0.369925	0.900903	-0.0868739						0.206822	1.09179	0.315081
O95104	SCAF4	12	9	1	1.03652	1.06845	0.904364	0.571584	0.401164	0.339197	0.227806	1	1.06812	1.03385	0.919921	0.558476	0.388962	0.300637	0.223342	1	1.03013	0.996686	0.835758	0.538492	0.38804	0.264891	0.204605	1	0.912432	0.971552	0.802363	0.520064	0.334961	0.243625	0.222559	13.0968	-0.10729	0.201177	0.988351	12.8663	-0.117193	0.200982	0.990806	12.7307	-0.095254	0.067234	0.997885	12.1727	-0.10342
O95136	S1PR2	1		1	1.07825	1.12925	0.943658	0.541917	0.240936	0.0843133	0.00889371									1	1.09506	1.01672	0.851174	0.364056	0.260864	0.0844363	0.0571705									12.3503	-0.160405	0	0.983499					11.2779	-0.152689	0.0294473	0.986742
O95139	NDUFB6	15	7	1	0.927153	0.920536	0.876147	0.521099	0.266464	0.124539	0.0722135	1	0.97879	1.04148	0.907205	0.573106	0.389796	0.248323	0.132753	1	1.02294	0.994895	0.891556	0.573959	0.297297	0.134336	0.0856649	1	0.988663	1.05952	0.913897	0.596211	0.363611	0.228941	0.146601	12.1585	-0.130868	0	0.989114	13.1516	-0.101392	0	0.994122	12.5778	-0.127033	0	0.998871	13.0957	-0.109734
O95140	MFN2	20	17	1	1.03344	1.03168	0.827733	0.390554	0.173605	0.117661	0.0804907	1	0.979479	0.955325	0.718412	0.311392	0.117297	0.075127	0.0704129	1	1.01108	0.971806	0.758638	0.359068	0.164032	0.112044	0.0647697	1	0.970087	0.907255	0.700771	0.319215	0.125264	0.088027	0.0640511	11.1446	-0.162619	0.0517624	0.998153	10.3525	-0.164716	0.0165739	0.998206	10.7706	-0.149274	0.0161733	0.999458	10.2894	-0.150783
O95147	DUSP14	1		1	1.25102	3.8938	0.971301	0.715296	0.678223	0.739559	0.46461									1	1.10962	1.22457	1.06874	0.655901	0.612074	0.605652	0.392033										-0.0867203	0.603656	0.0154881						-0.189662	0.532563	0.846391
O95149	SNUPN	7	4	1	0.963566	0.988142	0.896584	0.530098	0.158076	0.0822827	0.0742619	1	0.938655	0.977078	0.914388	0.514415	0.144965	0.041086	0.0300614	1	0.989864	1.03418	0.966834	0.59463	0.180678	0.0901142	0.0786348	1	0.903727	1.01618	0.963225	0.608918	0.169084	0.0677518	0.0350172	12.0302	-0.168059	0.0180789	0.996397	11.9975	-0.185551	0	0.995805	12.4538	-0.207515	0.0610363	0.998864	12.5281	-0.201565
O95154	AKR7A3	1		1	0.904776	1.48725	0.950473	0.53454	0.231486	0.176766	0									1	0.879089	0.869036	0.815197	0.48237	0.282561	0	0									12.3868	-0.149204	0	0.858613					11.6651	-0.144867	0	0.953284
O95155-4	UBE4B	35	31	1	1.00747	1.03757	0.854467	0.441142	0.165373	0.0659118	0.044306	1	1.01937	1.01028	0.860893	0.455837	0.178356	0.0680433	0.0412838	1	1.00157	1.02715	0.858799	0.440893	0.169733	0.0768682	0.0424572	1	0.984557	0.990755	0.844079	0.443225	0.177999	0.0738428	0.0466946	11.4938	-0.160247	0	0.998455	11.5992	-0.157707	0	0.999171	11.5174	-0.15856	0	0.999231	11.4817	-0.153874
O95158	NXPH4	3	1	1	0.90595	0.936779	0.77578	0.421291	0.202322	0.0871454	0.0392176	1	1.07785	0.9353	0.668303	0.360722	0.0701999	0.0382184	0.0903277	1	0.999182	1.16929	0.98679	0.456882	0.192453	0.127388	0.0605658	1	1.02315	1.12077	0.744946	0.366486	0.0942528	0.02289	0	11.1314	-0.140219	0	0.987952	10.2031	-0.156167	0	0.985382	11.8474	-0.212126	0.0867665	0.978602	10.6582	-0.17565
O95159	ZFPL1	7	4	1	1.0962	1.09495	1.0164	0.646865	0.358618	0.114133	0.0688426	1	0.987588	1.00206	0.882241	0.617978	0.333265	0.140855	0.0250788	1	0.996526	0.988373	0.916187	0.619072	0.305792	0.114444	0.0595034	1	1.10171	1.04364	0.869295	0.691547	0.397479	0.163765	0.0617304	13.3161	-0.140385	0	0.981742	12.8821	-0.130328	0	0.993156	12.8712	-0.137536	0	0.998328	13.523	-0.121658
O95163	IKBKAP	64	54	1	1.05324	1.05171	0.891983	0.439263	0.175249	0.117308	0.0891282	1	0.99311	0.991583	0.840982	0.413433	0.155698	0.0764874	0.0579997	1	1.02762	0.99032	0.841578	0.405574	0.173349	0.117437	0.0824914	1	1.01529	1.02084	0.857691	0.423999	0.155299	0.0835439	0.0556928	11.5617	-0.173685	0.0650501	0.995775	11.3055	-0.159731	0.00510304	0.999717	11.2574	-0.161588	0.0496699	0.999248	11.4068	-0.163515
O95164	UBL3	4		1	0.984198	1.76189	0.97338	0.825181	0.947922	0.972944	0.526325									1	1.00399	1.1678	0.952074	0.834402	0.97268	0.798647	0.517838										-0.245266	0	0.268056						-0.0942056	0	0.780998
O95166	GABARAP		5									1	0.928491	0.956675	0.885666	0.744445	0.929587	1.09848	1.24807									1	0.974792	0.949609	0.878338	0.828421	0.882355	1.13794	1.08358
O95167	NDUFA3	8	6	1	1.12515	0.959905	1.06804	0.789783	0.699147	0.564324	0.481651	1	1.31719	1.1432	1.13482	0.718523	0.678632	0.662269	0.633114	1	0.955053	1.01905	0.923692	0.872673	0.573076	0.49655	0.340108	1	0.921936	1.13152	0.793082	0.738508	0.730926	0.530639	0.467434	20.7301	-0.0621691	0.397675	0.924852		-0.313563	0.657994	0.723194	17.1161	-0.070036	0.106213	0.978186	20.4194	-0.0438822
O95168	NDUFB4	9	7	1	0.937426	0.900751	0.730521	0.339168	0.160538	0.105924	0.0759597	1	0.975257	0.945209	0.757535	0.361174	0.182827	0.109896	0.0763234	1	1.01369	1.00976	0.79117	0.386165	0.163586	0.097801	0.0723701	1	1.00182	0.955069	0.850723	0.37131	0.180146	0.125843	0.0698473	10.5407	-0.141564	0	0.990102	10.7936	-0.143215	0.0135022	0.997825	11.0081	-0.153177	0.0197461	0.999505	11.1299	-0.172061
O95169	NDUFB8	10	4	1	1.03405	0.987644	0.935044	0.716024	0.73196	0.80425	0.718335	1	1.00915	1.02211	0.940919	0.680787	0.725125	0.833016	0.870319	1	1.00512	1.03472	0.947577	0.786553	0.726748	0.678594	0.583421	1	0.945931	1.02481	0.889846	0.682932	0.637595	0.799732	0.705129		-0.648956	0.742642	0.950537		-0.563207	0.777312	0.7982		-0.0411305	0.476197	0.979372		-0.74969
O95178	NDUFB2	1	1	1	1.18793	1.01959	1.00129	0.805618	0.702848	0.708712	0.509637	1	1.03891	1.05711	0.990507	0.736369	0.841744	0.685312	0.686366	1	1.03239	1.11253	0.999501	0.747854	0.681174	0.582535	0.493579	1	0.845102	0.924218	0.754908	0.632175	0.561878	0.519808	0.388685		-0.0396623	0.0622882	0.857914		-0.669473	0.737448	0.883898		-0.0601839	0.442147	0.945488	17	-0.0531236
O95182	NDUFA7	7	9	1	1.01013	1.01676	0.91592	0.646466	0.472908	0.491191	0.368584	1	1.05113	1.03241	0.903409	0.643805	0.51896	0.516989	0.538428	1	0.995634	0.996408	0.885934	0.631595	0.517417	0.396516	0.315824	1	1.02255	1.06047	0.907619	0.686927	0.510525	0.441126	0.430838	14.7305	-0.0949313	0.375442	0.988907		-0.108539	0.511533	0.988068	14.8564	-0.0724249	0.129267	0.996674	15.5212	-0.0870083
O95197-5	RTN3	1	2	1	0.91963	1.0546	0.99234	0.762503	0.893382	0.627416	0.288394	1	1.25648	1.62147	1.256	0.881601	0.944623	1.15119	0.537959	1	0.894373	1.08804	0.979109	0.774311	0.823188	0.609857	0.280133	1	1.01689	0.852949	0.790992	0.62235	0.617696	0.571111	0.418398	18.9073	-0.105107	0	0.86304		0	0	0.223844	18.5712	-0.0762683	0	0.87112	19.9558	-0.0488439
O95197	RTN3	11	10	1	0.998771	1.05126	0.912066	0.718181	0.719069	0.538258	0.285585	1	1.05842	1.05847	0.975416	0.785245	0.78384	0.641669	0.316204	1	0.993861	1.03995	1.01385	0.777832	0.718241	0.488191	0.271511	1	1.0069	1.08888	0.961178	0.820149	0.712978	0.543823	0.312798	17.5487	-0.059479	0	0.936352	18.9619	-0.0628979	0	0.912946	17.3137	-0.0736159	0	0.968434	17.9736	-0.0667912
O95199	RCBTB2		3									1	1.20153	0.84831	1.07869	0.396472	1.6332	1.57238	1.92557									1	0.436565	1.13407	1.31576	0.378474	0.837746	0.45742	0.371251						0.229578	1.5	0.599217						-0.208391
O95202	LETM1	50	47	1	1.10854	1.08462	0.975203	0.680192	0.363881	0.107025	0.0349099	1	1.0223	1.0444	0.901033	0.668393	0.399252	0.163703	0.0714339	1	1.04649	1.02208	0.878079	0.58609	0.318867	0.0941746	0.0366285	1	1.04746	1.04446	0.921139	0.664914	0.361881	0.159445	0.077201	13.4211	-0.145641	0	0.982948	13.4663	-0.120691	0	0.992216	12.6167	-0.135081	0	0.991766	13.3527	-0.125627
O95208	EPN2	12	12	1	1.22852	1.38465	1.23241	1.10212	1.32481	1.52875	1.27207	1	0.997352	1.04843	0.950187	0.816677	1.03318	1.25807	1.21472	1	1.04636	1.02301	0.99403	0.911504	0.896265	0.986589	0.779385	1	1.02454	1.04994	0.994119	0.88174	1.01048	1.15708	1.12814			1.5	0.438053		0.673488	1.2364	0.717818		-0.0140317	0	0.613827
O95210	STBD1	15	6	1	0.993817	1.02006	0.917784	0.57424	0.291615	0.138164	0.0846084	1	1.00405	1.04008	0.94985	0.568677	0.299255	0.151002	0.0646253	1	0.981159	0.977005	0.865427	0.53936	0.259203	0.138178	0.0917111	1	1.00995	1.06686	0.934947	0.588832	0.285695	0.125238	0.0680344	12.6395	-0.130415	0	0.999424	12.7113	-0.133199	0	0.997187	12.2235	-0.126976	0	0.998934	12.7163	-0.138095
O95214-2	LEPROTL1	1	1	1	1.2814	1.36857	1.40661	1.15857	0.913141	0.729879	0.240239	1	1.21426	1.2929	0.908671	0.918179	0.942246	0.718858	0.291562	1	1.14046	1.31785	1.28716	0.949674	1.05737	0.425004	0.2059	1	1.0501	1.03231	0.838614	0.778582	0.713692	0.401284	0.23139	19.2499	-0.175106	0	0.613951	19.4103	-0.150301	0	0.77933	17.9352	-1.34647	0.205899	0.81381	16.5067	-0.0760653
O95218	ZRANB2	18	13	1	1.02022	0.972567	0.90679	0.718134	0.563763	0.476045	0.254356	1	0.972823	1.01036	0.867075	0.697572	0.540419	0.509088	0.349004	1	1.04056	1.02535	0.904911	0.731822	0.560413	0.416605	0.237925	1	1.04908	1.01004	0.903042	0.753295	0.513436	0.46254	0.350723	15.9538	-0.0670246	0	0.98223	16.5553	-0.0571632	0	0.986955	15.6049	-0.0735215	0	0.988795	16.0805	-0.0687609
O95219	SNX4	17	12	1	1.0296	1.10871	0.870439	0.436865	0.158662	0.0622727	0.0495651	1	0.974038	0.97279	0.852014	0.431144	0.151989	0.0770429	0.0755486	1	1.02508	1.00872	0.892609	0.446903	0.161879	0.0695632	0.0527811	1	1.03975	1.02595	0.876421	0.445093	0.176608	0.0898053	0.061175	11.5249	-0.16572	0.000220681	0.991027	11.3993	-0.162341	0.0177603	0.998091	11.6265	-0.170173	0.0115248	0.999378	11.5896	-0.161167
O95229	ZWINT	11	8	1	0.93895	1.00019	0.9251	0.686994	0.644928	0.560995	0.3006	1	0.954671	1.00018	0.924	0.632819	0.678516	0.621361	0.474649	1	1.0135	1.0579	0.952713	0.750238	0.698539	0.483964	0.299543	1	0.96086	1.04018	0.956436	0.724275	0.677835	0.598105	0.457374	17.3065	-0.0567357	0	0.940974		-0.0753128	0.536899	0.926863	17.2461	-0.0652875	0	0.968893	20.4655	-0.0485042
O95232	LUC7L3	23	20	1	1.00514	0.939765	0.780204	0.39536	0.140122	0.0350746	0.0177615	1	1.01892	0.969565	0.779978	0.37213	0.156655	0.0557436	0.0307965	1	1.01472	0.977455	0.800927	0.381835	0.136436	0.0483771	0.0265433	1	1.01213	0.978544	0.782776	0.376254	0.151231	0.065198	0.03565	10.9393	-0.162263	0	0.994913	10.8886	-0.158581	0	0.99856	10.986	-0.165936	0	0.998746	10.916	-0.157814
O95235	KIF20A	8	5	1	1.00073	1.07386	0.840591	0.394039	0.180213	0.0915237	0.0744721	1	1.002	1.0516	0.835315	0.351729	0.103834	0.0634291	0.0434053	1	0.961962	0.985068	0.748543	0.322693	0.189395	0.0858788	0.0538561	1	1.0609	1.03638	0.790448	0.319131	0.152386	0.0754476	0.0477959	11.228	-0.164065	0.0387047	0.995588	10.9628	-0.18643	0.0144412	0.997735	10.6299	-0.15276	0.0120913	0.997741	10.7149	-0.175384
O95239	KIF4A	52	29	1	0.988935	0.934382	0.718387	0.268584	0.0878039	0.0662652	0.0512974	1	0.967734	0.966715	0.728281	0.277073	0.0926861	0.0721019	0.0477434	1	1.0046	0.971084	0.725221	0.262371	0.0960616	0.0686364	0.0508075	1	0.994986	0.942915	0.727086	0.266632	0.0943286	0.0665697	0.0499497	10.1903	-0.184132	0.0171595	0.996963	10.2648	-0.184313	0.0199759	0.998338	10.2012	-0.191098	0.0274546	0.999478	10.2229	-0.187096
O95243	MBD4	1		1	0.899375	0.79156	0.803175	0.219495	0.0687112	0.169154	0.0486092									1	0.958543	0.952699	0.671146	0.232491	0.118525	0.0907898	0.0682626									10.2203	-0.259913	0.0860025	0.94637					9.87912	-0.194429	0.054598	0.99738
O95248-4	SBF1	22	17	1	1.14636	1.02426	0.801231	0.354473	0.176546	0.134725	0.0958675	1	1.00902	0.924703	0.737155	0.327233	0.135362	0.109218	0.0983528	1	0.996678	1.00521	0.782382	0.329245	0.168924	0.110326	0.0811306	1	0.98527	0.971546	0.760223	0.324345	0.157274	0.11806	0.0899317	10.8564	-0.17007	0.081016	0.983885	10.4627	-0.163588	0.0511202	0.995553	10.6946	-0.172057	0.062829	0.999801	10.5671	-0.170354
O95249	GOSR1	11	5	1	0.999475	1.03037	0.890024	0.493969	0.294622	0.286029	0.208789	1	0.982642	1.0016	0.815593	0.473903	0.289687	0.240695	0.185761	1	1.0353	1.05518	0.898331	0.484203	0.302493	0.214558	0.168547	1	1.082	1.18228	0.892738	0.52071	0.259768	0.216445	0.175338	11.9458	-0.147074	0.213885	0.996874	11.7108	-0.125088	0.143096	0.999224	11.9913	-0.143699	0.15393	0.994866	12.0843	-0.147328
O95251	KAT7	4	4	1	0.996712	1.00789	0.80686	0.380875	0.208974	0.153463	0.11626	1	0.96945	0.90466	0.716794	0.282091	0.0799208	0.051385	0.0365956	1	1.05536	1.0154	0.882463	0.382231	0.239246	0.143081	0.111013	1	0.950111	0.935104	0.718902	0.287173	0.113052	0.052264	0.0566102	11.0265	-0.158254	0.0953399	0.999737	10.2204	-0.177688	0	0.992989	11.2894	-0.176718	0.114305	0.995331	10.2799	-0.17007
O95260-2	ATE1	20	13	1	1.00898	1.06048	0.994746	0.812615	0.957419	0.869526	0.267065	1	1.00257	1.05064	1.03241	0.851822	1.13479	1.15983	0.316891	1	1.01587	1.06872	0.990198	0.866932	0.961761	0.75188	0.23015	1	1.03724	1.08115	1.04466	0.902014	1.07579	1.07679	0.387791	19.8461	-0.233261	0	0.912493	20.8893	0	0	0.864267	19.3148	-0.195584	0	0.955328	20.9616	0
O95260	ATE1	4	1	1	0.790442	0.806175	0.74313	0.61641	0.762371	0.695114	0.33926	1	0.860202	0.978183	0.914314	0.894585	1.19787	1.29662	0.462599	1	0.978385	1.05303	1.05868	0.986906	1.05399	0.888163	0.445065	1	0.937624	0.964316	0.940974	0.942076	1.02995	1.036	0.417279			0.0484014	0.554802		-0.11466	0.953198	-0.0187118	18.6558	-0.765314	0.445064	0.96668
O95271	TNKS	7	7	1	0.894923	0.933501	0.788483	0.416348	0.216333	0.11682	0.0608619	1	1.06115	1.05089	0.892186	0.454995	0.253108	0.167626	0.164254	1	1.03715	1.02295	0.875432	0.498514	0.254322	0.121813	0.0769801	1	0.970829	0.971113	0.820404	0.462429	0.240252	0.16116	0.104339	11.2145	-0.133954	0	0.986477	11.6832	-0.161387	0.13894	0.994237	12.0343	-0.133596	0	0.998155	11.6329	-0.126535
O95273	CCNDBP1	8	8	1	1.02003	1.05586	0.955226	0.713965	0.434881	0.180889	0.091353	1	1.05179	1.14442	0.978382	0.784339	0.5183	0.219968	0.0588013	1	1.01654	0.989618	0.93299	0.698428	0.429316	0.170202	0.0770142	1	0.965441	1.01461	0.975262	0.792442	0.463672	0.211754	0.0620428	13.9657	-0.121474	0	0.994064	14.7335	-0.126687	0	0.97353	13.8063	-0.122012	0	0.994758	14.4985	-0.13056
O95292	VAPB	14	10	1	1.02471	1.0752	0.972476	0.803416	0.714019	0.461274	0.228781	1	0.971704	0.98593	0.877026	0.830238	0.761028	0.486344	0.246235	1	0.985435	1.03675	0.975326	0.811455	0.701019	0.388391	0.216725	1	1.0079	1.00877	0.885427	0.880164	0.734053	0.483833	0.254726	17.0051	-0.0825973	0	0.968846	17.487	-0.0833718	0	0.945435	16.5762	-0.09077	0	0.981971	17.4834	-0.0865417
O95294-3	RASAL1	7	7	1	0.93482	1.0628	0.717345	0.363634	0.16136	0.0956815	0.0643784	1	0.944546	1.01678	0.792971	0.352952	0.219253	0.164736	0.108426	1	1.02985	1.01827	0.825516	0.419964	0.184918	0.129683	0.0810949	1	0.946966	0.957303	0.826765	0.352828	0.213335	0.144539	0.105231	10.646	-0.14753	0.00653177	0.991664	10.8517	-0.163486	0.107194	0.995748	11.3061	-0.150504	0.0398518	0.998633	10.9579	-0.171386
O95295	SNAPIN	4	8	1	0.928482	0.981236	0.882054	0.611314	0.542228	0.537256	0.389363	1	0.993795	1.02825	0.944077	0.725498	0.781766	0.740886	0.666876	1	0.921411	1.00997	0.911005	0.686808	0.627216	0.474771	0.312635	1	0.968128	0.970162	0.934897	0.755532	0.726454	0.682056	0.49183	16.2182	-0.0769929	0.387431	0.963686		-0.702145	0.728757	0.948621	16.5833	-0.0605623	0	0.967246		-0.0376344
O95297	MPZL1	10	9	1	0.901724	0.994509	0.819423	0.742685	0.960512	1.18863	1.01036	1	0.92292	0.946316	0.859466	0.740111	0.996883	1.22828	1.18649	1	0.941918	0.9705	0.925441	0.861917	1.05211	1.12406	0.898359	1	1.02076	1.00157	0.93513	0.802263	0.987199	1.09711	1.13651		-0.164262	0.944322	-0.0213739			0.982924	0.00140777			0.967758	0.0178563		-0.0372034
O95298	NDUFC2	7	4	1	1.00904	0.930972	0.809929	0.408344	0.157003	0.0363067	0.0245216	1	1.04249	1.00956	0.888938	0.435098	0.160224	0.0512172	0.0123674	1	0.97341	0.968201	0.838931	0.430666	0.161217	0.0666716	0.032482	1	0.951035	1.00177	0.813109	0.425421	0.173697	0.0626996	0.030957	11.1413	-0.161799	0	0.994687	11.5677	-0.174876	0	0.998225	11.3756	-0.159409	0	0.998178	11.2725	-0.154499
O95299	NDUFA10	18	17	1	0.942878	0.894295	0.731751	0.311353	0.0993155	0.0401847	0.027168	1	0.972022	0.952607	0.757952	0.330051	0.127617	0.0626092	0.0431692	1	1.00936	0.985221	0.746316	0.327628	0.109631	0.0475403	0.0334001	1	1.04485	0.956736	0.737118	0.312029	0.130218	0.0652221	0.0428233	10.3797	-0.172223	0	0.989233	10.6116	-0.164143	0	0.998082	10.5357	-0.170485	0	0.999327	10.4681	-0.163494
O95302	FKBP9	25	21	1	0.999956	1.03243	0.94779	0.796535	0.955461	1.06917	0.771504	1	1.0101	1.02119	0.957312	0.781219	1.02724	1.19117	0.963103	1	1.0532	1.11632	1.05966	0.91018	1.05978	0.960734	0.685869	1	0.996557	1.01487	0.974344	0.831689	0.961681	1.06064	0.882049		-0.236544	0.898167	0.26305		-0.0547877	0.984011	0.0110885						-0.161964
O95336	PGLS	20	16	1	1.12109	1.09347	1.05866	0.850409	0.835983	0.164574	0.0259548	1	1.05818	1.08737	1.04009	0.851988	0.915564	0.375638	0.0316768	1	1.01654	1.04748	0.9795	0.86117	0.803669	0.190809	0.0429184	1	0.972316	1.08683	0.886513	0.926757	0.91311	0.348686	0.0504401	16.3541	-0.273405	0.00465042	0.96234	17.3805	-0.234731	0	0.965818	16.3285	-0.237892	0.00773662	0.98069	17.2689	-0.230609
O95340-2	PAPSS2	18	9	1	1.00793	1.04761	0.926222	0.627343	0.323337	0.0732781	0.0283839	1	0.99006	1.05486	0.925877	0.67864	0.343013	0.0273603	0.00583239	1	0.997449	1.05894	0.990123	0.717185	0.348503	0.0908632	0.0338487	1	1.01609	1.06525	1.00034	0.7089	0.364986	0.0574769	0.0152565	12.9404	-0.148185	0	0.99306	13.2196	-0.163517	0	0.98678	13.5312	-0.157312	0	0.995116	13.5119	-0.162557
O95347	SMC2	77	56	1	0.988253	0.937262	0.739969	0.310089	0.0940194	0.057667	0.0417601	1	1.006	0.934128	0.744406	0.321402	0.08882	0.0480898	0.030166	1	0.984403	0.947335	0.729412	0.303527	0.0946366	0.0578033	0.0442017	1	1.01022	0.965121	0.737931	0.301366	0.0913354	0.0506174	0.0389401	10.4287	-0.172187	0	0.997024	10.4726	-0.174332	0	0.996404	10.3667	-0.171776	0	0.99781	10.3965	-0.176482
O95352	ATG7	23	21	1	1.01183	1.11337	0.951072	0.540131	0.261685	0.159628	0.106618	1	1.04899	1.07128	0.909632	0.531287	0.230359	0.094812	0.0648555	1	1.00911	1.04259	0.914735	0.519997	0.275256	0.117437	0.0801399	1	1.06266	1.03597	0.921747	0.515086	0.219364	0.0937651	0.0534117	12.353	-0.156272	0.0866128	0.989103	12.2181	-0.147783	0	0.994234	12.2869	-0.137276	0.00943723	0.997417	12.1382	-0.154112
O95359-3	TACC2	26	24	1	0.93659	1.11644	0.891982	0.733094	0.872537	0.887126	0.598181	1	0.970001	1.03997	0.968312	0.803179	0.955436	1.08437	0.805947	1	0.991658	1.02525	0.973708	0.879026	0.991661	0.812551	0.545949	1	1.02343	1.06198	1.01432	0.88278	0.986259	0.953144	0.752297		-0.0226333	0	0.565062		-0.208147	0.912233	0.201667		-0.11421	0.46351	0.911649
O95361	TRIM16	17	8	1	1.09947	1.23787	1.009	0.680993	0.447315	0.250095	0.10482	1	0.996327	1.01563	0.94912	0.589352	0.41974	0.238296	0.117734	1	1.00642	1.0449	0.93223	0.673893	0.423654	0.193331	0.117562	1	0.8853	0.943948	0.883765	0.619334	0.407078	0.224899	0.102379	14.0953	-0.110563	0	0.941009	13.4115	-0.104354	0	0.992732	13.7288	-0.112009	0	0.995557	13.2851	-0.104072
O95363	FARS2	8	7	1	0.925003	0.865033	0.762348	0.360746	0.170472	0.0775622	0.0519921	1	0.998586	0.9534	0.762227	0.36378	0.110653	0.0491153	0.020468	1	0.942535	0.981526	0.80802	0.405226	0.167311	0.102213	0.0620866	1	0.986596	0.948917	0.795574	0.358864	0.116479	0.0598125	0.0288402	10.7544	-0.146847	0	0.981136	10.7176	-0.167038	0	0.997028	11.1735	-0.148728	0.00498215	0.996943	10.854	-0.169759
O95365	ZBTB7A	5	5	1	0.97187	1.00295	0.801019	0.449336	0.323669	0.214206	0.08802	1	1.01617	1.02428	0.871413	0.519362	0.34796	0.233372	0.16855	1	0.987942	0.996095	0.849001	0.499385	0.340222	0.189842	0.10112	1	1.01851	0.978705	0.902946	0.541572	0.359001	0.212125	0.155259	11.8103	-0.109433	0	0.993567	12.4206	-0.113987	0.100446	0.997552	12.2623	-0.110501	0	0.996931	12.6844	-0.113026
O95372	LYPLA2	16	14	1	1.22059	1.08631	1.15775	0.899048	0.674036	0.421458	0.200887	1	1.23727	1.23675	1.16722	0.901547	0.767941	0.478528	0.207295	1	1.00142	1.08643	1.02812	0.853824	0.597412	0.334228	0.151953	1	0.95581	1.19718	0.862474	0.915977	0.671659	0.417704	0.24716	16.7992	-0.102875	0	0.911107	17.5057	-0.108465	0	0.850785	15.8284	-0.108633	0	0.988096	16.8937	-0.0914041
O95373	IPO7	44	43	1	1.10168	1.0746	0.909591	0.449696	0.175497	0.0613561	0.0402955	1	1.00564	0.998671	0.823818	0.448174	0.171618	0.0619076	0.0409129	1	1.02523	1.03164	0.848809	0.423264	0.1651	0.0641124	0.0333255	1	0.982052	0.967103	0.793972	0.4225	0.161618	0.0689851	0.0460813	11.7136	-0.17168	0.00487848	0.989411	11.411	-0.153846	0	0.998446	11.3933	-0.16209	0	0.998446	11.1586	-0.150954
O95376	ARIH2	16	9	1	1.13787	1.02256	0.940191	0.613564	0.252092	0.074594	0.0481549	1	1.00451	1.09435	0.990759	0.677658	0.359301	0.17625	0.119072	1	1.00773	1.03983	0.970863	0.637978	0.250281	0.0728812	0.0413272	1	0.975289	0.963485	0.926972	0.690868	0.333047	0.171146	0.100029	12.7173	-0.159063	0	0.985692	13.4781	-0.133675	0.0497628	0.991253	12.8599	-0.167697	0	0.998481	13.423	-0.12665
O95379	TNFAIP8	4	2	1	1.03933	1.09396	0.956454	0.741305	0.652794	0.333073	0.0986971	1	1.13185	1.28211	0.973085	0.980623	0.940255	0.417364	0.0982023	1	1.05708	1.09816	0.962011	0.776389	0.675812	0.331904	0.104711	1	0.848702	1.13693	1.03225	0.840055	0.638169	0.295236	0.137609	15.56	-0.100662	0	0.956652	17.6082	-0.224592	0.0348155	0.909328	15.8787	-0.10771	0	0.95876	15.8484	-0.116527
O95382	MAP3K6	4	4	1	0.989544	0.941805	0.803257	0.390551	0.175432	0.0749095	0.0620153	1	0.934876	0.92028	0.819003	0.402737	0.306935	0.247135	0.193425	1	0.984173	0.986679	0.823535	0.436629	0.164942	0.097597	0.0768411	1	0.90758	0.937155	0.75729	0.40243	0.251935	0.210178	0.17894	11.0898	-0.149912	0	0.99748	11.2343	-0.14726	0.195653	0.985481	11.3568	-0.148724	0.00894501	0.998845	10.9827	-0.133426
O95391	SLU7	4	2	1	0.964355	0.92563	0.720086	0.328506	0.178921	0.146436	0.146057	1	1.01245	0.935542	0.793063	0.310701	0.176915	0.141111	0.110159	1	1.03746	0.874918	0.748389	0.324166	0.208914	0.169634	0.119435	1	0.923377	0.904976	0.713546	0.285981	0.20416	0.145283	0.120796	10.3816	-0.160825	0.10371	0.994469	10.5906	-0.188952	0.10752	0.996371	10.5466	-0.151896	0.0943069	0.985216	10.2337	-0.167063
O95394-4	PGM3	33	27	1	1.02577	1.03728	0.919703	0.645999	0.279381	0.0506999	0.0246171	1	1.00017	1.02712	0.879966	0.656514	0.323776	0.0759622	0.029623	1	1.00291	1.00154	0.93543	0.674854	0.284847	0.0747318	0.0260511	1	1.00939	0.99305	0.907907	0.698258	0.324634	0.0893134	0.0389383	12.9001	-0.163264	0	0.994226	13.0268	-0.145966	0	0.990183	13.0874	-0.163017	0	0.997663	13.3026	-0.151676
O95396	MOCS3	14	11	1	0.994882	1.01554	0.843764	0.455929	0.199899	0.115815	0.0752689	1	0.987854	1.00126	0.784347	0.450381	0.279439	0.222503	0.203616	1	1.01784	0.9718	0.807155	0.463196	0.206463	0.112155	0.078119	1	0.998357	0.975383	0.820004	0.457343	0.293337	0.224055	0.18636	11.5896	-0.143322	0.013017	0.999559	11.3894	-0.129518	0.154529	0.999615	11.4946	-0.134044	0	0.998673	11.6192	-0.128738
O95400	CD2BP2	17	16	1	1.00121	1.01335	0.897044	0.758705	0.736187	0.473063	0.144552	1	0.98645	1.04616	0.947342	0.751062	0.833574	0.600161	0.145206	1	0.981851	0.997346	0.907639	0.810107	0.785358	0.433136	0.14435	1	1.02271	1.07099	0.93091	0.822115	0.807201	0.582751	0.178983	16.727	-0.0874505	0	0.924499	18.1527	-0.132301	0	0.877597	17.1037	-0.117048	0	0.945301	18.0233	-0.111334
O95402	MED26	3	3	1	0.968298	0.933622	0.891047	0.598406	0.398778	0.216204	0.148116	1	0.994558	1.09218	0.931304	0.584651	0.433339	0.344447	0.22695	1	1.07609	1.09239	0.963657	0.632145	0.407807	0.227044	0.155906	1	0.928094	0.939921	0.878725	0.607321	0.349232	0.256567	0.225053	13.1902	-0.100723	0	0.992804	13.4331	-0.103564	0.194935	0.98252	13.5452	-0.11092	0.0515004	0.98405	12.987	-0.106392
O95405	ZFYVE9	8	8	1	1.01399	1.18203	0.977141	0.712477	0.62763	0.53613	0.389051	1	0.967877	1.04079	0.89761	0.677091	0.547411	0.351318	0.146253	1	0.992216	1.04245	0.951462	0.719875	0.581761	0.433568	0.316725	1	0.987419	1.02642	0.913906	0.709327	0.552441	0.32175	0.159906	17.7161	-0.0633459	0.267499	0.919611	14.6876	-0.0848074	0	0.97734	16.2162	-0.0669511	0.014603	0.992027	14.8513	-0.0885904
O95407	TNFRSF6B	4	2	1	1.40956	1.55021	1.45067	1.05806	0.901514	0.814283	0.516761	1	0.986078	0.995933	0.871873	0.415751	0.314981	0.223013	0.187086	1	1.11458	1.10415	0.924069	0.549672	0.584736	0.368229	0.235898	1	1.00704	0.970039	0.922685	0.493684	0.366263	0.284888	0.196451		-0.0906443	0	0.237736	11.4553	-0.159768	0.195883	0.996442	14.6455	-0.0738328	0	0.933827	12.2485	-0.137315
O95425	SVIL	3	10	1	0.924074	1.01921	0.805472	0.41757	0.185397	0.0494395	0.0398647	1	1.00337	1.0223	0.873436	0.436267	0.264932	0.205122	0.11762	1	0.996406	0.97265	0.827945	0.400926	0.187481	0.101272	0.0485534	1	1.04488	1.05011	0.890978	0.488376	0.291292	0.212761	0.118144	11.2246	-0.153249	0	0.993259	11.6199	-0.149194	0.12002	0.996935	11.2686	-0.148692	0.000336405	0.999382	12.0725	-0.133952
O95429	BAG4	9	11	1	1.0055	1.00257	0.938425	0.821703	0.964464	1.12993	1.00521	1	0.946795	1.08605	0.998414	0.748354	1.02343	1.22598	1.14867	1	1.0124	1.01727	1.00755	0.84998	1.00544	0.992187	0.888094	1	0.997876	0.999647	1.00035	0.84903	0.8896	1.06179	1.00363		-0.0956538	0.971945	0.0339217		0.429082	1.18732	0.465918		-0.0478585	0.934107	0.372772		-0.0839069
O95433	AHSA1	56	52	1	1.01735	0.961633	0.869943	0.50248	0.189637	0.0631138	0.0356133	1	1.00816	1.02063	0.88621	0.527234	0.230663	0.103447	0.0677813	1	1.0095	1.00614	0.887691	0.498081	0.191668	0.066691	0.0333752	1	1.00341	1.02258	0.900449	0.543408	0.231417	0.109396	0.0669431	11.8641	-0.157041	0	0.997143	12.1369	-0.142105	0	0.999248	11.9061	-0.16008	0	0.99919	12.2629	-0.143415
O95453	PARN	31	26	1	0.971924	0.978765	0.908295	0.717651	0.61034	0.277515	0.036286	1	0.994357	1.03892	0.9263	0.737145	0.695894	0.401768	0.0481381	1	1.00328	1.03131	0.942715	0.792592	0.660855	0.278816	0.0546981	1	1.00849	1.01981	0.952273	0.771816	0.672	0.391246	0.0654395	14.9122	-0.108134	0	0.953672	15.9664	-0.103042	0	0.928585	15.6837	-0.126495	0	0.969585	15.9825	-0.106359
O95455	TGDS		1									1	1.10189	1.24125	1.11938	0.910488	1.20032	1.19658	1.09017									1	1.21158	1.06193	1.02013	0.912192	0.807075	0.731456	0.834802						0.0864628	1.16377	-0.175727						-0.0734967
O95456	PSMG1	19	20	1	1.01655	1.01295	0.964886	0.870744	1.11707	1.26504	0.97663	1	1.00438	1.05451	0.972655	0.895542	1.18519	1.43909	1.30893	1	1.02307	1.06653	0.992374	0.918261	1.12899	1.08209	0.862933	1	1.0444	1.04291	1.05499	0.936576	1.08866	1.19828	1.16136		0.23107	1.12083	0.379269		0	1.37401	0.905506		-0.0127092	0.996929	-0.0120719		0.536968
O95466-3	FMNL1		1									1	1.55308	0.861029	0.657703	0.40239	0.169861	0.135702	0.0497854									1	1.13045	0.926488	0.837544	0.274574	0.156126	0.151597	0.149534					10.2673	-0.125862	0	0.829218					10.4771	-0.24445
O95470	SGPL1	27	16	1	1.02434	0.998613	0.773971	0.327691	0.113309	0.0480058	0.0264836	1	1.01695	0.938473	0.708467	0.308026	0.0942354	0.035388	0.021663	1	1.00125	0.927495	0.715843	0.293119	0.115217	0.0534459	0.0327375	1	0.994641	0.911851	0.697331	0.278678	0.0998434	0.045252	0.0249874	10.658	-0.174955	0	0.999355	10.2721	-0.173259	0	0.996578	10.2843	-0.168717	0	0.997018	10.1367	-0.173554
O95471	CLDN7	1	1	1	1.15034	1.24875	1.26503	1.0304	1.19608	1.09839	0.818693	1	1.36814	1.239	1.37178	1.29077	1.51078	2.11174	1.10261	1	0.962613	0.869198	0.79586	0.724222	0.977159	0.611396	0.482994	1	1.39509	1.96463	1.35441	1.40985	1.77941	2.10277	1.4612		0	0.0554544	-0.313802			1.5	0.222693		-0.0327986	0	0.562608
O95478	NSA2	2	5	1	0.936945	1.07332	0.844085	0.448765	0.354437	0.365977	0.319363	1	1.02037	0.954289	0.766488	0.318075	0.196274	0.164553	0.0863237	1	0.999653	1.0835	0.840687	0.456555	0.387046	0.339451	0.220484	1	1.01795	0.955319	0.733994	0.348385	0.195637	0.148164	0.114194	11.3503	-0.1701	0.334378	0.985908	10.5886	-0.168479	0.0943686	0.996247	11.8352	-0.131824	0.258607	0.981528	10.5988	-0.148616
O95479	H6PD	12	9	1	1.05349	1.26037	0.991623	0.63173	0.266235	0.115432	0.0792041	1	1.00548	1.03942	0.942302	0.662381	0.316864	0.11328	0.0600949	1	1.01825	1.06681	0.993221	0.634735	0.291931	0.109233	0.070679	1	1.04639	1.08975	0.990644	0.693162	0.310532	0.118286	0.0548081	12.8712	-0.165525	0.0455213	0.953321	13.1672	-0.14323	0	0.997738	12.9969	-0.153093	0.0165031	0.99517	13.3429	-0.152164
O95486	SEC24A	24	21	1	1.13458	1.17503	0.996541	0.569956	0.253508	0.150486	0.112042	1	1.00235	1.07137	0.881895	0.489559	0.207716	0.0686615	0.0361613	1	0.984924	1.01505	0.871981	0.471525	0.219367	0.12019	0.0870439	1	1.02933	1.03781	0.886959	0.485136	0.187872	0.0757257	0.0336441	12.4841	-0.179322	0.106955	0.965435	11.8786	-0.155596	0	0.995412	11.7725	-0.146109	0.0328933	0.999549	11.8403	-0.15946
O95487	SEC24B	33	26	1	1.03112	1.00054	0.83464	0.402442	0.154507	0.0737969	0.0378714	1	1.0405	1.05258	0.83786	0.4143	0.172986	0.0791955	0.0664535	1	1.00996	0.988799	0.806297	0.394874	0.156301	0.0683529	0.0419934	1	1.01418	1.00223	0.821857	0.395145	0.158293	0.0773894	0.0383854	11.2395	-0.161278	0	0.999206	11.3227	-0.157566	0.0134465	0.996402	11.0969	-0.157299	0	0.999585	11.1687	-0.158635
O95502	NPTXR	3	5	1	0.833966	1.03387	0.837748	0.624906	0.639803	0.648832	0.533313	1	1.04427	1.14051	1.0482	0.790326	0.940898	1.07717	0.784026	1	1.08585	1.06982	0.895732	0.647006	0.682149	0.570381	0.381531	1	1.09821	1.15376	1.09228	0.815684	0.878447	0.914456	0.816081		-0.116124	0.600149	0.847028		-0.00943618	0.257683	0.215949	18.4924	-0.0494225	0	0.923422		-0.0739936
O95503	CBX6	1	3	1	0.860558	0.871976	0.775045	0.315096	0.286118	0.311161	0.28133	1	0.942714	0.932279	0.80047	0.399627	0.244513	0.203951	0.208496	1	1.0876	0.99229	0.932033	0.456193	0.399177	0.156857	0.16206	1	0.925696	0.948565	0.830763	0.364309	0.243461	0.188729	0.142323	9.99075	-0.300656	0.291929	0.947778	11.0165	-0.157138	0.176691	0.991521	12.2141	-0.132066	0.124166	0.974361	10.9932	-0.171797
O95544-2	NADK	8		1	0.919771	0.969528	0.913564	0.716495	0.828626	0.868577	0.506066									1	0.991864	1.0242	0.988713	0.849027	0.964384	0.80361	0.495517										-0.0271917	0	0.590118					20.9984	-0.102717	0	0.895715
O95544	NADK		6									1	0.99791	1.08425	1.02491	0.787663	0.979608	1.11927	0.741021									1	1.04204	1.14661	1.03007	0.890143	1.01601	1.0936	0.709032						0	0	0.463475						0
O95551-2	TDP2	9	9	1	0.963595	0.988884	0.909091	0.780835	0.843729	0.76316	0.408135	1	1.0012	1.0732	0.9496	0.730013	0.837175	0.840658	0.462045	1	1.0053	1.04579	0.982644	0.888453	0.908227	0.699224	0.376696	1	1.02723	1.02195	0.998067	0.851843	0.874146	0.802834	0.455079		-0.0452542	0	0.791086		-0.0337328	0	0.716636	19.7695	-0.101476	0	0.960291	20.9079	-0.081276
O95562	SFT2D2	1		1	1.02512	1.15254	0.965899	0.760127	1.16096	1.45458	1.2942									1	0.998857	1.09572	1.15535	0.909887	1.29254	1.20448	0.891852										0.926896	1.13138	0.0673784						0.309773	1.09164	0.0892617
[truncated: 8,901 more rows]
[truncated: 24 more columns]
