# Supplementary material for: Assessing target engagement using proteome-wide solvent shift assays
Source: eLife. 2021 Dec 8;10:e70784. doi: 10.7554/eLife.70784 (PMC8654358; doi:10.7554/eLife.70784)
Supplement: Figure 2—source data 2. — N = 2. [file elife-70784-fig2-data2.xlsx]

## Sheet: legend
The table contains two repeat experiments.
Each repeat experiment is in one single TMTpro-16plex group.
Each replicate contains a DMSO-treated 8-concentration SPP experiment and a MLN8237-treated 8-concentration SPP experiment.
	Vehicle								MLN8237
AEA (%)	0	3	6	9	12	15	18	21	0	3	6	9	12	15	18	21
TMTpro labeling	126	127N	127C	128N	128C	129N	129C	130N	130C	131N	131C	132N	132C	133N	133C	134N
Peptides	The number of quantified peptides
norm_rel_fc	Protein quantifications (scaled to the first concentration, then normalized by TPP package to account for technical errors)
meltPoint	Denaturation concentration determined by TPP pacakge
slope	Curve slope determined by TPP pacakge
plateau	Curve plateau determined by TPP pacakge
R_sq	Curve R2 determined by TPP package
diff_meltP_MLN8237_vs_Vehicle	Difference between this protein’s denaturation concentration in DMSO experiment and MLN8237 experiment
min_slope_MLN8237_vs_Vehicle	Minimum slope of this protein′s fitted curves in DMSO experiment and MLN8237 experiment
pVal_adj_MLN8237_vs_Vehicle	Benjamini-Hochberg–adjusted P value of this protein’s denaturation concentration difference between DMSO experiment and MLN8237 experiment
passed_filter_MLN8237_vs_Vehicle	Did this protein meet the quality criteria (R2 > 0.8, plateau <0.3) in DMSO experiment and MLN8237 experiment?
diff_meltP_Vehicle_1_vs_Vehicle_2	Difference between this protein’s denaturation concentration in the two DMSO experiments
min_pVals_less_0.1_and_max_pVals_less_0.2	Is one of the P values for the two replicate experiments <0.05 and the other one <0.1?
meltP_diffs_have_same_sign	Do the denaturation concentration shifts in the two DMSO vs MLN8237 experiments have the same sign?
meltP_diffs_T_vs_V_greater_V1_vs_V2	Are both the denaturation concentration differences in the DMSO vs MLN8237 experiments greater than the denaturation concentration difference between the two DMSO experiments?
minSlopes_less_than_0.06	Is the minimum slope in each of the DMSO vs. MLN8237 experiments <−0.06?
fulfills_all_4_requirements	Does this protein fulfill all of the four requirements above?
model_converged	Does the fitting of the sigmoidal curve succeed?
Pass_R2(0.8)&Plateau(0.3)	Does the curve have a R2 greater than 0.3, a plateau smaller than 0.3, a valid denaturation concentration, and a valid slope?
For details for column names and TPP package: Franken, H., Mathieson, T., Childs, D. et al. Thermal proteome profiling for unbiased identification of direct and indirect drug targets using multiplexed quantitative mass spectrometry. Nat Protoc 10, 1567–1593 (2015). https://doi.org/10.1038/nprot.2015.101

## Sheet: MLN8237_SPP_8Concentrations_2Re
Uniprot ID	Gene Symbol	Peptides_Rep1	Peptides_Rep2	norm_rel_fc_126_Vehicle_1	norm_rel_fc_127N_Vehicle_1	norm_rel_fc_127C_Vehicle_1	norm_rel_fc_128N_Vehicle_1	norm_rel_fc_128C_Vehicle_1	norm_rel_fc_129N_Vehicle_1	norm_rel_fc_129C_Vehicle_1	norm_rel_fc_130N_Vehicle_1	norm_rel_fc_126_Vehicle_2	norm_rel_fc_127N_Vehicle_2	norm_rel_fc_127C_Vehicle_2	norm_rel_fc_128N_Vehicle_2	norm_rel_fc_128C_Vehicle_2	norm_rel_fc_129N_Vehicle_2	norm_rel_fc_129C_Vehicle_2	norm_rel_fc_130N_Vehicle_2	norm_rel_fc_130C_MLN8237_1	norm_rel_fc_131N_MLN8237_1	norm_rel_fc_131C_MLN8237_1	norm_rel_fc_132N_MLN8237_1	norm_rel_fc_132C_MLN8237_1	norm_rel_fc_133N_MLN8237_1	norm_rel_fc_133C_MLN8237_1	norm_rel_fc_134N_MLN8237_1	norm_rel_fc_130C_MLN8237_2	norm_rel_fc_131N_MLN8237_2	norm_rel_fc_131C_MLN8237_2	norm_rel_fc_132N_MLN8237_2	norm_rel_fc_132C_MLN8237_2	norm_rel_fc_133N_MLN8237_2	norm_rel_fc_133C_MLN8237_2	norm_rel_fc_134N_MLN8237_2	meltPoint_Vehicle_1	slope_Vehicle_1	plateau_Vehicle_1	R_sq_Vehicle_1	meltPoint_Vehicle_2	slope_Vehicle_2	plateau_Vehicle_2	R_sq_Vehicle_2	meltPoint_MLN8237_1	slope_MLN8237_1	plateau_MLN8237_1	R_sq_MLN8237_1	meltPoint_MLN8237_2	slope_MLN8237_2
A0AV02-2	SLC12A8	5	1	1	0.984426	0.961717	0.779006	0.485464	0.286536	0.184153	0.165503	1	1.01188	0.877748	0.72028	0.453634	0.247862	0.177072	0.275413	1	1.06857	1.04022	0.885029	0.482515	0.279288	0.205574	0.126894	1	0.86155	0.914024	0.886151	0.503369	0.357639	0.120405	0.231991	11.7289	-0.107937	0.0225159	0.998682	11.0247	-0.10468	0.0765193	0.976959	11.9672	-0.13799	0.10575	0.99306	12.1964	-0.127825
A0AV96	RBM47	8	3	1	1.01171	1.01841	0.831652	0.522443	0.277032	0.154282	0.139691	1	0.937299	0.985312	0.851245	0.462884	0.202721	0.0814607	0.0432921	1	0.932509	0.962148	0.865584	0.526082	0.274207	0.179097	0.11604	1	1.10403	1.163	0.941567	0.487951	0.226553	0.10162	0.0477772	12.0805	-0.118396	0.0219809	0.99828	11.6393	-0.148752	0	0.996094	12.2156	-0.121063	0.0242097	0.99415	12.0466	-0.162557
A0AVF1	TTC26	7	9	1	0.973525	1.01088	0.820927	0.436645	0.220022	0.10963	0.0813929	1	1.03409	1.01886	0.811306	0.430155	0.228667	0.195905	0.151204	1	0.945993	0.967984	0.735452	0.418731	0.210624	0.0962815	0.0846318	1	1.0754	1.09583	0.950885	0.529027	0.271463	0.198374	0.136384	11.4644	-0.137105	0.00592783	0.999037	11.2949	-0.145386	0.12176	0.997982	10.9724	-0.130648	0	0.995764	12.2748	-0.159593
A0AVI4	TMEM129	1		1	1.07134	0.901214	0.892145	0.467362	0.275299	0.184967	0.254699									1	0.872428	1.02465	0.682817	0.418472	0.242747	0.168142	0.180782									11.6868	-0.164288	0.202033	0.981055					10.7351	-0.128631	0.103489	0.977946
A0AVT1	UBA6	62	51	1	0.965854	0.980657	0.847281	0.582964	0.387534	0.17922	0.0351464	1	0.963353	0.992501	0.853137	0.593481	0.331227	0.112633	0.0419267	1	0.98858	0.980463	0.860637	0.607084	0.380826	0.176209	0.0465376	1	0.97651	1.00733	0.853836	0.565195	0.283333	0.111969	0.049999	12.7768	-0.113592	0	0.985114	12.6261	-0.127502	0	0.990263	12.9433	-0.115384	0	0.989715	12.3494	-0.131487
A0FGR8-6	ESYT2	23	19	1	0.999542	0.9882	0.816906	0.445354	0.242662	0.155585	0.168846	1	1.05551	1.02261	0.815966	0.449353	0.236925	0.169221	0.124147	1	0.960576	0.943463	0.750896	0.426272	0.229765	0.157329	0.153961	1	0.998337	0.969281	0.801593	0.439649	0.236767	0.161009	0.122828	11.4201	-0.140138	0.105875	0.999026	11.4959	-0.135156	0.0708694	0.996537	11.095	-0.123844	0.0520827	0.995906	11.4049	-0.130278
A0JLT2	MED19	3	2	1	0.983663	1.0386	0.799919	0.402573	0.216139	0.231301	0.196169	1	1.03374	0.955587	0.741467	0.348283	0.161247	0.103664	0.0276328	1	0.920444	0.847274	0.687329	0.378151	0.221127	0.185314	0.234554	1	1.06642	0.950927	0.611357	0.370421	0.21006	0.070226	0.0638876	10.9744	-0.165036	0.181877	0.996421	10.6553	-0.149404	0	0.997482	10.3865	-0.104231	0.0122727	0.972093	10.0957	-0.132359
A0JNW5	UHRF1BP1L	20	16	1	0.998274	0.965481	0.80508	0.465861	0.202026	0.0810939	0.055716	1	1.01901	0.9835	0.845482	0.473745	0.213512	0.0810067	0.0703982	1	0.956787	0.954082	0.780506	0.458228	0.206551	0.101328	0.0624376	1	1.04328	1.01402	0.877354	0.489086	0.218985	0.119484	0.0845401	11.4636	-0.140564	0	0.997315	11.6903	-0.142642	0	0.998701	11.3358	-0.133979	0	0.995327	11.8823	-0.144631
A0MZ66-3	KIAA1598	33	48	1	0.988575	0.984526	0.828358	0.592335	0.605192	0.944004	1.38381	1	0.95313	0.952571	0.877086	0.649447	0.683349	1.00034	1.36898	1	1.02143	1.02696	0.89782	0.65178	0.647008	0.983547	1.40532	1	0.982729	1.04766	0.939263	0.768201	0.816205	1.05155	1.19248		-0.344743	0.870739	0.0608742		-0.217382	0.91584	0.0130119		-0.258829	0.917096	0.0434488		-0.157409
A0PJW6	TMEM223	2	1	1	0.909468	1.09108	0.875515	0.474624	0.221895	0.099407	0.0715324	1	0.971234	0.913439	0.745625	0.37913	0.126213	0.0602665	0.0439052	1	1.04215	1.04954	0.860396	0.466218	0.21339	0.0980559	0.0940114	1	1.05649	0.980509	0.814513	0.411057	0.217167	0.0795597	0.072813	11.8257	-0.146327	0.0109308	0.986426	10.7031	-0.154806	0	0.992511	11.6961	-0.147286	0.0275614	0.996039	11.3016	-0.141701
A0PK00	TMEM120B	4	1	1	1.05275	1.1194	0.999861	0.494574	0.322304	0.202925	0.271775	1	1.08322	1.02789	0.897081	0.393191	0.25119	0.212682	0.114927	1	0.975867	0.964086	0.856211	0.434863	0.299776	0.222163	0.185054	1	0.976173	0.786816	0.711578	0.441868	0.310563	0.197936	0.203894	12.0145	-0.224036	0.251653	0.979348	11.3525	-0.181102	0.153526	0.98944	11.5452	-0.146809	0.175251	0.996864	10.7536	-0.0936132
A1A4S6	ARHGAP10	21	9	1	0.997157	1.02842	0.797025	0.379816	0.153883	0.0890319	0.0730893	1	0.991454	0.93632	0.724074	0.326899	0.117776	0.0588626	0.0409964	1	1.00231	0.988155	0.761716	0.379844	0.152957	0.0895477	0.0760591	1	1.01173	0.941255	0.716983	0.311281	0.120509	0.0713654	0.0506365	10.9841	-0.159564	0.0244185	0.998907	10.4302	-0.162027	0	0.997262	10.8536	-0.148791	0.00678231	0.999387	10.3602	-0.160467
A1A5B4	ANO9	1		1	1.07604	0.751372	0.675443	0.380711	0.169377	0.237983	0									1	1.03298	0.80492	0.684207	0.374299	0.215407	0	0									9.85727	-0.115738	0	0.940721					10.318	-0.141857	0	0.960555
A1A5C7	SLC22A23	1		1	1.00715	1.0657	0.857692	0.497505	0.454227	0.3177	0.21091									1	0.830535	1.02286	0.752993	0.488869	0.257906	0.312124	0.211987									12.8062	-0.0986455	0.163187	0.979129					11.4701	-0.120267	0.181599	0.951392
A1A5D9	CCDC64B		1									1	0.844298	1.00849	0.810697	0.512801	0.498401	0.277157	0.276134									1	0.958267	1.06544	0.943119	0.583033	0.339144	0.191448	0.270994					13.0746	-0.0845161	0.117692	0.940295					12.6445	-0.15018
A1IGU5	ARHGEF37	2		1	0.92686	0.97094	0.833976	0.535417	0.400678	0.315032	0.391297									1	0.830846	1.00361	0.751546	0.484047	0.423871	0.292225	0.196161									12.3982	-0.119619	0.327715	0.982485					12.3729	-0.0857304	0.010755	0.948777
A1L0T0	ILVBL	23	20	1	0.969275	0.9553	0.831535	0.453633	0.264326	0.239842	0.243567	1	0.887295	0.916962	0.749653	0.434295	0.237705	0.17376	0.147342	1	1.0165	1.01329	0.85753	0.472371	0.274055	0.245005	0.223474	1	0.975979	0.949457	0.725569	0.417275	0.253504	0.20674	0.137119	11.4253	-0.149301	0.207752	0.995724	11.1825	-0.112742	0.00807437	0.981185	11.6666	-0.14794	0.199696	0.999081	11.0557	-0.113061
A1L170-2	C1orf226		1									1	0.993049	1.36784	1.27002	0.797084	0.50299	0.477586	0.497786									1	1.18902	1.11328	1.19112	0.574628	0.609193	0.454866	0.499833					14.5212	-0.264593	0.491159	0.760821						-0.450458
A1L390	PLEKHG3	8	7	1	0.980206	1.006	0.840799	0.469318	0.221599	0.152166	0.125288	1	1.04322	0.989839	0.922485	0.487253	0.247305	0.18438	0.23208	1	0.963671	0.994179	0.82649	0.458791	0.207525	0.145491	0.119864	1	1.06727	1.05645	0.863546	0.476295	0.26164	0.159107	0.154233	11.6375	-0.140388	0.0669526	0.999155	11.8507	-0.179151	0.189855	0.996094	11.513	-0.140489	0.0571376	0.998094	11.7931	-0.142107
A1L3X0	ELOVL7	3		1	0.964552	1.00821	0.86554	0.48619	0.275795	0.135982	0.054082									1	0.955338	0.962578	0.748826	0.443889	0.22314	0.112518	0.0540816									11.9948	-0.130351	0	0.997143					11.162	-0.129459	0	0.995264
A1X283	SH3PXD2B	30	38	1	0.977818	1.01246	0.884238	0.620758	0.60886	0.608367	0.10785	1	0.957137	0.98551	0.879334	0.660792	0.663313	0.428412	0.0417898	1	1.01372	0.992898	0.899891	0.632424	0.598332	0.552504	0.118285	1	1.01793	0.997275	0.913776	0.805786	0.661955	0.275428	0.0643932	15.7067	-0.0662152	0	0.847393	15.225	-0.084572	0	0.892529	15.4871	-0.0697593	0	0.893809	15.7298	-0.127715
A1XBS5	FAM92A1	10	9	1	0.928625	0.969078	0.861276	0.556538	0.352473	0.205582	0.11774	1	0.984296	0.992484	0.917639	0.517891	0.338286	0.125567	0.0648247	1	0.937219	0.973273	0.852875	0.547827	0.351459	0.202474	0.0917852	1	1.01993	1.01319	0.909664	0.602226	0.343713	0.124423	0.0810313	12.6642	-0.106194	0	0.992602	12.4607	-0.127405	0	0.993957	12.5588	-0.108564	0	0.992341	12.8952	-0.126587
A2RRP1	NBAS	37	27	1	1.0306	0.972545	0.790269	0.399698	0.14674	0.0846528	0.0853825	1	1.00241	0.941555	0.733372	0.356286	0.126146	0.0699039	0.0666652	1	0.997287	0.994112	0.770573	0.378986	0.149959	0.102162	0.093073	1	1.01411	0.947502	0.737696	0.329895	0.145278	0.092597	0.0605286	11.0266	-0.152505	0.0138652	0.997595	10.5853	-0.153277	0	0.997057	10.8518	-0.155071	0.0353438	0.999104	10.5421	-0.154366
A2RTX5	TARSL2	19	12	1	1.00916	1.01147	0.876743	0.570954	0.499118	0.569282	0.61087	1	1.03433	1.0105	0.872882	0.595305	0.551681	0.610529	0.512402	1	0.977308	1.00213	0.836093	0.568329	0.477896	0.568442	0.543312	1	1.02225	1.02354	0.928896	0.704224	0.613755	0.49996	0.332277		-0.236325	0.561027	0.981451		-0.140881	0.55513	0.982957		-0.166226	0.531429	0.985525	16.9284	-0.0590958
A2RU49	HYKK	1	2	1	0.786758	0.942061	0.848356	0.552981	0.355974	0.317954	0.330941	1	1.11584	1.08349	0.93613	0.493499	0.272914	0.131363	0.0510039	1	0.91693	0.948065	0.873069	0.432329	0.352392	0.383706	0.249769	1	0.999984	1.03418	1.0671	0.445998	0.231571	0.0860531	0	12.4672	-0.116574	0.275357	0.912521	12.2035	-0.14324	0.0143783	0.982528	11.3777	-0.176281	0.312672	0.974011	11.9516	-0.212742
A2RU67	KIAA1467	2	4	1	0.995891	0.811656	0.683671	0.540442	0.326826	0.452749	0.361482	1	0.960243	0.914886	0.864874	0.594868	0.362977	0.362198	0.457009	1	0.994208	1.06114	1.04731	0.616035	0.446192	0.433579	0.566029	1	0.980329	1.15888	0.937689	0.533909	0.485242	0.440176	0.296108	12.5758	-0.071248	0	0.961418	12.8903	-0.123132	0.372537	0.959716	12.254	-1.2044	0.481933	0.969539	12.9345	-0.132311
A2RUB1	C17orf104		1									1	1.2105	1.07999	0.942572	0.556145	0.627595	0.670044	0.643477									1	1.04781	0.929655	0.860777	0.572597	0.590017	0.491391	0.601469						-1.15881	0.624315	0.863674						-0.18216
A2RUC4	TYW5	5	4	1	0.978767	1.05364	0.900944	0.573119	0.374395	0.229445	0.145372	1	0.948443	1.13288	0.890391	0.571349	0.355583	0.253226	0.198646	1	0.984063	1.04472	0.877949	0.598759	0.388585	0.208745	0.126181	1	0.891921	1.03344	0.89262	0.624909	0.395435	0.240498	0.226019	13.0122	-0.105484	0.0242533	0.994764	12.7792	-0.115536	0.138811	0.977838	13.1007	-0.104516	0	0.995414	13.3282	-0.103011
A2VDJ0-5	KIAA0922	7	8	1	1.04192	1.09646	0.928597	0.492853	0.305129	0.181672	0.14116	1	1.05826	1.03913	0.917279	0.522692	0.296571	0.152276	0.104376	1	1.00925	0.992548	0.849361	0.496996	0.272776	0.166058	0.13063	1	0.979429	1.05846	0.832767	0.435825	0.248656	0.132187	0.0552668	12.1366	-0.147423	0.124518	0.988232	12.3515	-0.13368	0.0449706	0.99466	11.9692	-0.125242	0.0489566	0.999863	11.596	-0.133749
A3KMH1	VWA8	51	38	1	1.00285	0.976985	0.776186	0.389957	0.149112	0.0742723	0.0634615	1	1.00703	1.00564	0.813179	0.411298	0.187868	0.123736	0.111008	1	1.01643	0.991889	0.789055	0.386459	0.151922	0.0846505	0.0795466	1	1.04207	0.968493	0.778194	0.38605	0.186538	0.155522	0.127425	10.9442	-0.151484	0	0.999063	11.1904	-0.15259	0.0612631	0.999565	10.9769	-0.155	0.0173282	0.999146	10.9085	-0.152431
A3KN83-2	SBNO1		29									1	1.04131	1.06664	0.937806	0.64154	0.376004	0.179276	0.119182									1	1.03397	1.07367	0.976221	0.664588	0.323332	0.169311	0.137571					13.3734	-0.116019	0	0.993562					13.1975	-0.146781
A3KN83	SBNO1	36		1	0.98593	0.979504	0.848325	0.575006	0.390174	0.164592	0.111331									1	1.00893	1.0138	0.877743	0.595556	0.391567	0.159683	0.124823									12.7675	-0.107205	0	0.993057					12.9978	-0.109331	0	0.994809
A4D126	ISPD	2		1	1.06784	1.04439	0.952129	0.674716	0.716499	0.431335	0.170309									1	0.909748	0.97909	0.816293	0.659905	0.59398	0.427076	0.149506									16.1237	-0.0767157	0	0.923727					14.8638	-0.0719127	0	0.925567
A4D1E9	GTPBP10	21	21	1	1.00307	0.916077	0.699202	0.420004	0.234396	0.194054	0.121459	1	0.956936	0.956245	0.759213	0.413767	0.252498	0.166396	0.118956	1	1.03374	0.999318	0.802177	0.437044	0.256998	0.203603	0.141707	1	1.05371	0.953408	0.765477	0.43025	0.245831	0.168442	0.118056	10.8447	-0.110783	0	0.99709	11.179	-0.120121	0.0227972	0.99731	11.4068	-0.132055	0.101704	0.998425	11.2807	-0.118169
A4D1P6	WDR91	8	6	1	0.973737	0.998185	0.811312	0.520382	0.355905	0.254756	0.227345	1	1.01107	1.04806	0.883498	0.545044	0.314318	0.238264	0.259309	1	0.994671	0.95855	0.863737	0.562802	0.349231	0.269313	0.202571	1	1.02431	1.01028	0.835347	0.535428	0.28999	0.236988	0.203488	12.2797	-0.104054	0.130116	0.99879	12.2989	-0.134037	0.205882	0.995495	12.7289	-0.103971	0.105554	0.99816	12.1557	-0.118633
A4D1U4	LCHN	5	4	1	1.00232	1.13513	0.884422	0.488344	0.272276	0.206199	0.129412	1	1.14891	1.16537	0.969785	0.560068	0.322037	0.245057	0.122333	1	1.00127	1.0256	0.848292	0.482381	0.262802	0.156119	0.123002	1	1.00375	1.00886	0.788408	0.433264	0.286185	0.160608	0.0495432	11.9715	-0.140998	0.111632	0.983046	12.6908	-0.138889	0.125311	0.956789	11.8528	-0.13073	0.0533786	0.999117	11.4976	-0.122125
A4D2B0	MBLAC1		1									1	0.863556	0.963917	0.754516	0.493178	0.488904	0.890728	1.22574									1	0.949578	0.931736	0.940952	0.851113	0.793716	0.988525	1.19344
A4D997	ERCC6L2		1									1	0.846153	0.997079	0.876371	0.317039	0.15089	0.0432925	0.13488									1	1.1022	0.940163	0.866681	0.29064	0.185183	0.0879143	0.111276					10.8985	-0.220448	0.0850818	0.976516					10.7535	-0.224666
A5A3E0	POTEF		97									1	1.03521	0.995874	0.856907	0.610057	0.575529	0.670971	0.562484									1	1.02179	1.06345	0.930752	0.683344	0.613185	0.576857	0.393227						-0.20631	0.603402	0.971946					18.2128	-0.0571291
A5D8V6	VPS37C	5	4	1	1.03084	1.00342	0.893929	0.612276	0.553905	0.491597	0.528639	1	1.11361	1.15077	0.93233	0.67203	0.633725	0.779307	0.812769	1	0.982479	0.944734	0.841135	0.6176	0.506423	0.481474	0.455947	1	1.00248	1.12744	0.964543	0.827371	0.726398	0.714416	0.681561		-0.112248	0.50941	0.994321		-0.751694	0.724458	0.781827	15.9923	-0.0803927	0.406236	0.993613		-0.0539719
A5PLL7	TMEM189	1	1	1	0.912273	1.03338	0.874161	0.532392	0.451166	0.631385	0.55511	1	0.958066	0.897002	0.737237	0.48373	0.380594	0.461799	0.547886	1	1.05148	1.23557	0.907396	0.618817	0.56771	0.532326	0.553992	1	0.885579	0.994398	0.850662	0.468848	0.526534	0.410475	0.478283		-1.18133	0.542513	0.932179	10.8273	-0.241358	0.465791	0.937249		-0.124739	0.544808	0.887766	9.37501	-1.36237
A5PLN9-5	TRAPPC13	8	6	1	1.05131	0.982909	0.828462	0.501828	0.255342	0.16011	0.0514045	1	1.04879	1.00608	0.86261	0.507489	0.273997	0.161177	0.0724789	1	1.0413	1.04502	0.870004	0.498022	0.287636	0.177832	0.0735726	1	1.00634	1.02483	0.78842	0.51749	0.281602	0.190503	0.105657	11.8991	-0.125638	0	0.995627	12.1163	-0.124653	0	0.997227	12.161	-0.122229	0	0.994861	11.952	-0.111286
A5YKK6	CNOT1	96	68	1	0.992835	0.953948	0.784222	0.458237	0.201328	0.100044	0.0795577	1	1.00716	0.963568	0.80932	0.458692	0.209029	0.0933522	0.0651784	1	1.01646	0.98941	0.823674	0.46383	0.212798	0.110013	0.0888686	1	1.02903	1.01116	0.821758	0.44955	0.220664	0.105623	0.0664632	11.3463	-0.13347	0	0.997163	11.4706	-0.13784	0	0.998237	11.585	-0.134462	0	0.999315	11.5258	-0.137206
A5YM69	ARHGEF35	1	1	1	1.03144	1.1764	0.787815	0.625519	0.50477	0.613033	0.838239	1	0.742568	0.882737	0.853517	0.633649	0.517259	0.759972	0.899546	1	1.1755	1.08562	0.90494	0.606779	0.537915	0.644508	0.8365	1	0.911192	0.850862	0.711731	0.627424	0.58976	0.889084	0.696447		-0.82964	0.64539	0.765202		-0.0697172	0.710949	0.0543506		-0.892483	0.656425	0.774037		-0.210247
A6NCE7	MAP1LC3B2	3	2	1	0.986888	1.01423	0.898954	0.579823	0.512292	0.788993	0.756703	1	1.10098	1.0193	1.14589	0.776792	0.558719	0.717946	0.941223	1	1.11416	1.13329	1.09351	0.647384	0.619543	0.788986	0.872112	1	1.08732	1.03731	0.869311	0.577925	0.665478	0.702069	0.586357		-0.963007	0.659453	0.791155		-0.643765	0.739296	0.636947		-0.158636	0.73129	0.718371		-0.948821
A6NCI4	VWA3A		2									1	1.35634	1.23794	0.937356	0.674305	0.748861	0.715676	0.664404									1	1.13449	1.00084	1.16391	1.35864	0.880204	0.77244	0.802166						-0.93079	0.700812	0.619769						-0.439295
A6NCS6	C2orf72	2		1	0.887086	0.984509	0.819006	0.366141	0.137129	0.0898234	0.0448293									1	1.0298	0.938209	0.814474	0.46634	0.181573	0.070713	0.04341									10.997	-0.16793	0.0152379	0.989418					11.46	-0.147285	0	0.994334
A6ND36	FAM83G	13	13	1	1.03357	1.02645	0.867799	0.553158	0.434259	0.313281	0.15538	1	1.01768	0.945367	0.802643	0.584635	0.475468	0.33274	0.105884	1	1.00448	1.04682	0.859995	0.555014	0.439504	0.313316	0.150778	1	1.0111	1.02376	0.945897	0.684368	0.509891	0.291151	0.104517	13.2934	-0.0885174	0	0.988403	13.2761	-0.0845809	0	0.970727	13.2971	-0.088472	0	0.986675	14.3878	-0.0991134
A6NDB9	PALM3	2	3	1	0.978159	1.05405	0.901214	0.527372	0.447459	0.501201	0.394565	1	1.21949	1.17989	0.996983	0.588737	0.531659	0.505416	0.444425	1	1.09002	1.05494	0.966752	0.605956	0.482451	0.479008	0.430635	1	1.12245	1.40145	1.17954	0.760384	0.571434	0.481223	0.449976	12.5879	-0.159731	0.440569	0.983867	14.4613	-0.192648	0.490149	0.884382	13.8694	-0.147204	0.452043	0.979181	16.325	-0.130213
A6NDE4	RBMY1B	2		1	1.01911	0.969557	0.702379	0.3544	0.135457	0.0772284	0.0410649									1	1.04537	0.977759	0.775868	0.371454	0.164868	0.100972	0.0530488									10.456	-0.15134	0	0.998373					10.9093	-0.148325	0	0.998184
A6NDG6	PGP	17	18	1	1.00817	1.00875	0.870077	0.609183	0.619292	0.923251	1.32432	1	0.94526	0.977533	0.841203	0.649712	0.724994	0.990568	1.3033	1	1.03638	1.04304	0.932291	0.653056	0.631747	0.898089	1.25899	1	0.964693	1.00616	0.883883	0.754664	0.765073	0.935536	1.00618		-0.272639	0.869011	0.0927788		-0.272803	0.901955	0.0298385		-0.36452	0.860469	0.148541		-0.315275
A6NDU8	C5orf51	7	3	1	1.04619	1.28626	1.03685	0.653251	0.470695	0.358601	0.240044	1	0.971158	1.0112	0.828503	0.570168	0.590298	0.534169	0.441072	1	0.938392	1.02449	0.913065	0.585238	0.437324	0.315104	0.171919	1	0.982338	1.09563	0.921447	0.80809	0.567561	0.495735	0.533698	14.0771	-0.111347	0.23233	0.905331	19.8264	-0.0936497	0.481214	0.974552	13.6605	-0.0889009	0	0.986777		-0.0919658
A6NED2	RCCD1	2	2	1	0.945551	0.991507	0.894063	0.516837	0.485639	0.369926	0.15824	1	1.09059	0.948824	0.978219	0.597069	0.508519	0.290269	0.15201	1	0.986089	1.01409	0.822251	0.490046	0.434005	0.292453	0.0981415	1	1.10153	1.09885	1.10093	0.672354	0.429858	0.2285	0.14368	13.5899	-0.082055	0	0.962818	14.0745	-0.0918936	0	0.968744	12.6203	-0.0934347	0	0.97782	13.8713	-0.12646
A6NEL2	SOWAHB	1		1	1.01478	1.02808	0.730972	0.404675	0.205353	0.104291	0.0855441									1	0.95321	0.885843	0.742143	0.402414	0.191003	0.134421	0.0897158									10.9349	-0.132786	0	0.99763					10.8627	-0.12699	0	0.988824
A6NFI3	ZNF316	3	3	1	1.06239	1.03009	0.692629	0.356293	0.196518	0.088263	0.0381851	1	1.24656	1.13773	0.792177	0.396832	0.145418	0.0910404	0.0701459	1	0.895502	1.02262	0.660712	0.316718	0.176343	0.0966684	0.048701	1	1.0095	1.00599	0.69808	0.283716	0.110532	0.0674077	0.000205655	10.5415	-0.142482	0	0.993865	11.0465	-0.158939	0.0203242	0.951396	10.2398	-0.146052	0.000190624	0.988564	10.2052	-0.173897
A6NFQ2	FAM115C	2		1	1.03941	0.974303	0.785748	0.494184	0.204461	0.0895597	0.0173084									1	0.846129	0.908979	0.755474	0.450763	0.182098	0.0684022	0									11.5147	-0.139434	0	0.992148					11.0988	-0.144081	0	0.964689
A6NFY4	TMEM194B		1									1	1.24914	1.09852	0.789364	0.559404	0.155208	0.174623	0.176193									1	0.797698	0.868276	0.776472	0.425855	0.283257	0.185553	0.0947908					11.771	-0.132022	0.0728764	0.932198					11.3294	-0.111424
A6NGB9	WIPF3	6	6	1	1.00907	1.05052	0.964728	0.672613	0.655419	0.937193	1.19176	1	1.1358	1.0425	0.946341	0.668553	0.623264	0.886114	1.09806	1	1.05337	1.09684	0.964224	0.629863	0.641356	0.956605	1.17849	1	1.01164	0.986442	0.94769	0.805306	0.695353	0.824889	0.958271		-0.337262	0.864247	0.174471		-0.516801	0.818998	0.352424		-0.381957	0.851577	0.213561		-0.468342
A6NGR9	MROH6	2	1	1	0.845048	0.931323	0.715188	0.322276	0.174569	0.0704444	0.106884	1	1.11415	0.961516	0.667504	0.369642	0.0946772	0	0.0194473	1	0.872556	0.86335	0.695281	0.348995	0.177315	0.121879	0.0997283	1	0.925785	0.905269	0.797794	0.28493	0.0888106	0	0.0951599	10.4093	-0.150433	0.0272661	0.97295	10.2525	-0.163698	0	0.982307	10.3303	-0.128092	0	0.971794	10.5287	-0.204788
A6NHL2	TUBAL3	1	1	1	0.774123	0.669	0.619318	0.398071	0.140417	0.0733094	0	1	0.671434	0.554148	0.616367	0.364289	0.330868	0.201721	0.20036	1	1.08485	1.13277	1.11614	0.675104	0.327846	0.123553	0.017976	1	0.984985	0.692443	0.707982	0.515698	0.264764	0.219371	0	8.75275	-0.125798	0	0.858242	6.01774		0	0.847205	13.3872	-0.158654	0	0.969218	10.4942	-0.101608
A6NHQ4	C17orf96		1									1	0.951226	0.950244	0.806671	0.434149	0.273083	0.232893	0.227511									1	1.04314	0.946146	0.933193	0.518567	0.340838	0.250044	0.229968					11.2793	-0.144045	0.193875	0.994589					12.2768	-0.147713
A6NHR9	SMCHD1	59	54	1	0.987818	0.939158	0.631432	0.206	0.0611441	0.0508206	0.0546012	1	1.00353	0.911521	0.617665	0.217464	0.0780828	0.0767377	0.0708589	1	0.980722	0.928216	0.612736	0.19806	0.0694105	0.0591577	0.0571826	1	0.989651	0.889863	0.618043	0.218115	0.099103	0.0817581	0.0728204	9.6474	-0.199955	0.0182224	0.997516	9.58313	-0.182642	0.0251337	0.995287	9.54331	-0.196563	0.0217647	0.996814	9.55412	-0.165282
A6NI28	ARHGAP42	10	3	1	0.960796	0.942723	0.84785	0.491427	0.366795	0.294831	0.193516	1	1.18016	1.09352	0.813015	0.410103	0.192298	0.0479927	0	1	1.03594	0.998407	0.849175	0.5452	0.37189	0.308741	0.183468	1	1.09216	0.896124	0.90819	0.413857	0.190141	0.0228814	0.0177543	12.3145	-0.105817	0.136921	0.99008	11.2406	-0.159011	0	0.971894	12.8173	-0.0957596	0.0747837	0.994957	11.5545	-0.17703
A6NIH7	UNC119B	14	15	1	0.978681	0.997406	0.865557	0.638301	0.631942	0.931376	1.33034	1	0.885726	0.998844	0.866603	0.661941	0.766601	0.920344	1.09492	1	1.01679	1.03814	0.892891	0.670291	0.636145	0.981562	1.27391	1	0.935457	1.00303	0.897011	0.8494	0.710599	0.976557	0.961582		-0.310247	0.879503	0.0673825		-0.332008	0.860952	0.10544		-0.240279	0.890477	0.098148		-0.249006
A6NIL9	CRYM-AS1	3	1	1	0.812595	0.841399	0.924875	0.633574	0.347746	0.939239	1.50413	1	0.911219	1.1038	0.840225	0.832281	0.975352	1.41932	0.886494	1	0.868132	0.920779	0.926312	0.736861	0.719209	1.23775	1.33161	1	0.996466	0.686561	0.865362	0.884064	1.06152	1.60902	0.493731			0.857651	0.0233497		0.0154333	1.11322	0.0838869						-0.433159
A6NJ78	METTL15	9	6	1	1.01986	1.07298	0.814035	0.395709	0.139593	0.0633619	0.0627426	1	1.15189	1.00047	0.834802	0.401256	0.176425	0.134617	0.111056	1	0.965507	0.942519	0.71473	0.351132	0.13531	0.0631667	0.0721291	1	1.03342	0.939075	0.834224	0.407822	0.164848	0.0937685	0.0755039	11.1169	-0.162674	0.00449887	0.994902	11.1799	-0.164895	0.0802774	0.982717	10.4871	-0.150607	0	0.996169	11.2458	-0.157429
A6NKB5	PCNXL2	1	2	1	0.933457	0.912672	0.771934	0.600888	0.718589	1.26919	2.24773	1	1.37461	1.40405	1.00403	0.848108	1.02521	1.37564	0.778835	1	0.951675	1.07747	0.86885	0.707514	1.0269	1.75081	2.36163	1	1.1008	1.15817	1.25054	1.35781	1.16162	1.3039	0.772154		0	1.5	0.547934		0	0	-0.0762704		1.42597	1.5	0.573568
A6NKD9	CCDC85C	3	8	1	0.959995	1.03629	0.89463	0.565556	0.381002	0.301391	0.146764	1	1.09064	1.10668	0.90372	0.622568	0.490542	0.358377	0.242083	1	0.91808	0.971322	0.836418	0.580845	0.356124	0.27566	0.169567	1	1.07298	1.04712	1.01722	0.664738	0.517443	0.369418	0.239093	13.1225	-0.0981676	0.0363703	0.990021	14.3054	-0.08187	0.0789897	0.970084	12.9065	-0.0928297	0	0.989846	14.7804	-0.0896995
A6NKF1	SAC3D1	4	4	1	0.990397	0.983573	0.839299	0.473578	0.251251	0.165769	0.176368	1	1.07046	1.07425	0.806309	0.492653	0.257123	0.119732	0.108471	1	1.04215	1.03716	0.873798	0.538126	0.262674	0.15747	0.194034	1	0.986805	1.01756	0.811964	0.52454	0.263062	0.115632	0.0767269	11.6612	-0.138284	0.11234	0.998722	11.7851	-0.124007	0	0.989368	12.1405	-0.138498	0.116047	0.993732	11.9383	-0.125735
A6NKZ8		4		1	0.922709	1.22904	0.736487	0.254873	0.10228	0.0095016	0.0654049									1	0.772004	0.620005	0.3397	0.183724	0.127329	0.0303038	0									10.2401	-0.207017	0.0252584	0.961889					6.83386	-0.172544	0	0.937573
A6NNH0	GATSL1	4		1	1.02298	1.02961	0.893618	0.493689	0.267859	0.171713	0.121714									1	1.10011	1.03607	0.980359	0.490946	0.303141	0.209635	0.145089									12.0224	-0.140842	0.0846418	0.998374					12.1099	-0.174422	0.170475	0.985799
A6NNY8	USP27X	2		1	1.11007	1.00424	0.880995	0.430658	0.215917	0.0853337	0									1	1.08797	1.20229	0.800471	0.473115	0.249304	0.0591419	0.0717328									11.6153	-0.157281	0	0.989095					11.6168	-0.137629	0	0.962277
A6NP81		1	2	1	1.01003	0.91248	0.791361	0.599888	0.616387	0.654194	0.326789	1	1.1947	1.12906	0.927444	0.624298	0.678955	0.562067	0.0839433	1	1.0658	0.988378	0.825187	0.691618	0.544912	0.703635	0.282883	1	0.903601	0.963688	0.891232	0.64387	0.619548	0.45409	0.092883	18.5528	-0.0492626	0	0.880706	15.9256	-0.0722246	0	0.825813	17.8585	-0.0504806	0	0.851287	15.1025	-0.0776116
A6QL63	BTBD11		1									1	1.66723	1.06574	0.946782	0.522359	0.383884	0.392865	0.337258									1	1.41749	1.00651	1.37762	0.649936	0.467236	0.497197	0.360836					12.24	-0.172766	0.358826	0.702115					12.6529	-0.380826
A6ZKI3	FAM127A	3		1	1.10316	1.03286	0.8466	0.445404	0.208865	0.0936653	0.0641217									1	1.09099	1.04694	0.840055	0.433448	0.18735	0.104229	0.0654943									11.5742	-0.144489	0	0.991209					11.4491	-0.149879	0.0136166	0.992165
A7E2V4-2	ZSWIM8		9									1	0.966372	0.956887	0.745061	0.381052	0.213195	0.161701	0.102131									1	0.977997	0.983312	0.744638	0.431164	0.2291	0.153783	0.0949479					10.864	-0.132869	0.0416978	0.997826					11.1638	-0.121446
A7E2V4-4	ZSWIM8	6		1	1.0019	1.04309	0.765114	0.412528	0.167086	0.122884	0.064528									1	1.02641	1.01793	0.843959	0.4322	0.166655	0.106819	0.101898									11.0639	-0.140257	0	0.996753					11.3711	-0.160218	0.0503294	0.998243
A7KAX9	ARHGAP32	14	9	1	0.997932	1.05822	0.881115	0.543521	0.392619	0.308656	0.20836	1	1.16049	1.12193	0.934253	0.557417	0.433757	0.270125	0.190779	1	0.989393	1.00353	0.855025	0.561814	0.391429	0.280159	0.209884	1	1.04014	1.01225	0.945848	0.624853	0.405216	0.233503	0.155429	12.8241	-0.106468	0.164488	0.991847	13.1973	-0.106383	0.125835	0.954486	12.9608	-0.095566	0.0842266	0.999085	13.5174	-0.105608
A7MBM2	DISP2	2	1	1	0.863825	0.873411	0.887676	0.562274	0.473731	0.48561	0.481386	1	1.21586	1.07037	1.02781	0.661446	0.590476	0.789435	1.25791	1	0.88057	0.877843	0.858972	0.602552	0.435532	0.433277	0.466015	1	0.918903	1.094	1.04354	0.705584	0.60191	0.931248	1.39821	14.0531	-0.140632	0.472911	0.899314		-0.122443	0.825189	0.241407	13.986	-0.105537	0.41377	0.917259		-0.0438917
A8CG34	POM121C	3	3	1	0.934754	1.02113	0.90627	0.498878	0.360608	0.290267	0.315613	1	1.0151	1.25852	1.04029	0.492934	0.368383	0.283345	0.200293	1	0.95661	1.06913	0.76491	0.520278	0.381214	0.267807	0.134989	1	1.07831	1.02699	0.919808	0.520324	0.307548	0.249924	0.17722	12.0179	-0.155099	0.294974	0.992574	12.0521	-0.23022	0.270378	0.931851	12.3764	-0.0941039	0	0.983221	12.2605	-0.14218
A8K0R7-5	ZNF839	2		1	1.15836	1.11492	0.963124	0.552336	0.337134	0.306033	0.269913									1	0.968443	1.06807	0.790008	0.485299	0.304876	0.225175	0.212977									12.422	-0.169247	0.276963	0.962598					11.7056	-0.121769	0.151725	0.992093
A8K855	EFCAB7	1	2	1	0.856619	0.839475	0.633286	0.426358	0.259819	0.340726	0.252863	1	0.982681	0.87463	0.868428	0.450843	0.26635	0.19352	0.143136	1	1.00584	1.0485	0.736663	0.398394	0.309463	0.229839	0.144739	1	1.08754	0.955886	0.731328	0.512842	0.334592	0.145595	0.0900817	10.558	-0.0896431	0.0105992	0.949852	11.6803	-0.141408	0.115484	0.983346	11.0622	-0.127499	0.128969	0.992185	11.6631	-0.107629
A8MPP1	DDX11L8	7		1	0.997706	0.918382	0.716983	0.370394	0.146056	0.0911162	0.133141									1	1.01066	0.946756	0.75846	0.383729	0.16071	0.112814	0.139368									10.5405	-0.142733	0.0285529	0.992225					10.7821	-0.15224	0.0665312	0.995659
A8MPS7	YDJC	9	3	1	0.974309	1.04002	0.883773	0.550662	0.45066	0.542762	0.725506	1	1.15217	0.85059	0.85918	0.679196	0.520112	0.616413	0.619315	1	0.965625	0.978575	0.827927	0.527934	0.40924	0.547882	0.707601	1	0.915816	0.928657	0.958851	0.737648	0.512897	0.944842	0.775764		-1.15885	0.567397	0.891267		-0.0498835	0.431616	0.850081		-1.18647	0.548164	0.875359		-0.6877
A8MT69	STRA13		2									1	1.09444	1.22683	1.02577	0.835888	0.75125	0.581777	0.669941									1	1.05819	1.03578	1.04596	0.889544	0.870207	0.696126	0.618766						-0.0647319	0.618574	0.799045						-0.0401309
A8MVW0	FAM171A2	2	3	1	1.06156	1.02624	0.96188	0.588554	0.507121	0.567548	0.442613	1	1.24051	1.1538	0.945948	0.608716	0.538112	0.494515	0.497118	1	0.982801	1.02361	0.904918	0.561889	0.466589	0.548537	0.420531	1	0.987957	1.09979	0.917318	0.672518	0.464644	0.483108	0.463921		-0.161266	0.501211	0.975242		-0.13417	0.499518	0.87755	13.8845	-0.145491	0.471314	0.980526	15.2826	-0.106851
A8MWD9		12	11	1	0.986986	0.930116	0.77361	0.558268	0.50776	0.776679	1.14118	1	0.936581	0.975877	0.876838	0.533076	0.474897	0.580737	0.781863	1	1.0405	1.01716	0.91077	0.613108	0.55152	0.78443	1.15651	1	1.00951	1.09344	0.840321	0.592347	0.535774	0.72201	0.714805		-0.160148	0.751003	0.273573		-1.16518	0.592643	0.815189		-0.571531	0.776393	0.310567		-0.929766
A8MWY0	KIAA1324L	4	1	1	0.858055	0.946789	0.834237	0.53895	0.437414	0.406585	0.444065	1	0.846187	0.850055	0.642025	0.48579	0.382151	0.594446	0.293495	1	0.98804	0.956725	0.735664	0.525206	0.509666	0.480776	0.394115	1	0.927074	1.00074	0.906277	0.536467	0.520296	0.518387	0.48584	12.74	-0.125907	0.41004	0.945492	12.9795	-0.0704048	0	0.83973	13.9989	-0.0866476	0.38182	0.990393		-0.191296
A8MXV4	NUDT19	13	13	1	1.02794	1.05742	0.921113	0.651158	0.602856	0.50116	0.0623873	1	0.998471	1.0634	0.967517	0.679921	0.601131	0.372651	0.102584	1	1.00276	1.00709	0.857076	0.607412	0.569354	0.421776	0.0534519	1	0.997521	1.04	0.912952	0.698655	0.618176	0.274349	0.0994122	15.2554	-0.0798629	0	0.904257	15.1071	-0.0900259	0	0.958148	14.294	-0.0818837	0	0.924397	14.8921	-0.0979587
A9UHW6-3	MIF4GD	4	6	1	0.938982	1.03204	0.903882	0.61522	0.611061	0.662927	0.494448	1	0.924752	1.01655	0.861487	0.611244	0.574507	0.382918	0.152448	1	0.970723	1.00378	0.887659	0.601707	0.540632	0.54887	0.496931	1	1.00262	1.08614	0.860661	0.662481	0.570356	0.340284	0.126438		-0.137737	0.584884	0.936009	14.4742	-0.0768588	0	0.950566		-0.119155	0.517625	0.994365	14.5479	-0.0843002
B1AK53	ESPN	11	10	1	0.994415	0.93642	0.800886	0.55511	0.424774	0.388578	0.448446	1	0.926976	0.937202	0.83888	0.568584	0.552878	0.627762	0.832803	1	0.995304	1.0455	0.878794	0.58195	0.400426	0.382183	0.422542	1	1.01514	1.1274	0.967963	0.729054	0.623993	0.713891	0.784148	13.001	-0.106786	0.383579	0.986768		-1.02976	0.645507	0.731266	12.9647	-0.124439	0.376309	0.991337		-0.135737
B2RTY4-4	MYO9A	7		1	1.02821	1.12223	0.938198	0.582192	0.492776	0.559392	0.738581									1	0.940993	0.935912	0.797365	0.523126	0.445939	0.598237	0.772541										-1.25595	0.593235	0.884649						-1.083	0.584961	0.782003
B4E2M5	ANKRD66	1		1	1.01693	0.924623	0.706735	0.461436	0.214519	0.0654092	0.039153									1	1.1086	0.953788	0.845	0.468379	0.196465	0.0937606	0.0695879									10.9357	-0.131302	0	0.986954					11.6349	-0.1434	0	0.989278
B5ME19	EIF3CL	73		1	0.997202	0.934338	0.781355	0.437537	0.151648	0.0405161	0.033861									1	0.9947	0.948885	0.787051	0.444434	0.162524	0.0566195	0.0397227									11.129	-0.153915	0	0.992618					11.2094	-0.15002	0	0.994869
B7Z6K7	ZNF814		2									1	1.1634	1.20911	0.960281	0.611221	0.565669	0.751514	0.804254									1	0.924576	0.935231	0.832642	0.654797	0.598292	0.595458	0.811393						-0.832541	0.683164	0.729959						-1.29411
C9JI98	TMEM238		1									1	1.11031	1.24797	0.935498	0.598897	0.433398	0.273869	0.0917263									1	0.963049	0.974268	0.929957	0.5296	0.354218	0.187505	0.167218					13.5558	-0.10296	0	0.931388					12.5386	-0.127656
C9JLW8	FAM195B	10	4	1	0.909464	1.08738	0.923898	0.596869	0.654831	1.00381	1.61032	1	0.980748	1.09062	0.972649	0.657486	0.823689	1.15881	1.59109	1	0.960988	0.951534	0.863332	0.633606	0.623173	0.913853	1.37935	1	1.13518	1.18614	1.08732	0.962375	1.00477	1.16201	1.33432						0	1.5	0.682472
C9JTQ0	ANKRD63	1		1	0.945236	1.04337	0.934879	0.571727	0.268085	0.074494	0.0407194									1	0.932075	0.933307	0.851545	0.509805	0.280701	0.109874	0.0654715									12.5367	-0.152467	0	0.994568					12.0342	-0.129019	0	0.989898
O00115	DNASE2	7	7	1	1.01943	0.946128	0.87972	0.620125	0.622165	0.973435	1.43789	1	0.9397	0.940028	0.839305	0.667359	0.711352	1.01471	1.3578	1	1.00769	1.04476	0.938372	0.661729	0.672317	1.03828	1.44249	1	0.972514	1.05843	0.854539	0.748444	0.809515	1.04458	1.13604						-0.19666	0.918104	0.00640802		-0.15074	0.950639	0.0177554		-0.322477
O00116	AGPS	42	35	1	0.962414	0.935711	0.803338	0.52717	0.325967	0.173003	0.0454612	1	0.968776	0.978531	0.834918	0.542666	0.301652	0.140049	0.0655327	1	1.02402	0.995818	0.868527	0.549606	0.326481	0.171214	0.0678745	1	0.988842	0.997483	0.799985	0.469332	0.260037	0.123644	0.0649847	12.0834	-0.113971	0	0.987304	12.2269	-0.121392	0	0.995508	12.4956	-0.118316	0	0.99693	11.6148	-0.126644
O00124	UBXN8	3	3	1	1.00858	0.882645	0.823668	0.589592	0.50255	0.318648	0.12956	1	0.987882	0.905246	0.849645	0.42204	0.220909	0.17665	0.11185	1	0.867775	0.935551	0.830767	0.64007	0.563902	0.323694	0.0912381	1	1.04914	0.961075	0.818698	0.41769	0.255428	0.191318	0.143027	13.4751	-0.0824297	0	0.960612	11.4018	-0.150496	0.0922502	0.991075	14.1047	-0.0849413	0	0.918551	11.3252	-0.141258
O00139-2	KIF2A	18		1	0.989285	0.919835	0.706401	0.357158	0.136679	0.0729028	0.0581595									1	1.02006	0.963436	0.757906	0.36716	0.156164	0.0921269	0.0646659									10.4521	-0.147986	0	0.99536					10.7942	-0.147696	0	0.998971
O00139-4	KIF2A		17									1	0.94964	0.929693	0.749389	0.337412	0.119044	0.0716496	0.0542337									1	0.964445	0.949016	0.721924	0.310155	0.127106	0.0718484	0.0599995					10.5848	-0.160116	0	0.994409					10.3844	-0.161113
O00142	TK2	3	4	1	0.966306	0.850679	0.724805	0.508506	0.401506	0.472325	0.379554	1	1.00437	0.978834	0.854386	0.658011	0.45627	0.424163	0.327159	1	1.00368	1.05446	0.89985	0.575935	0.480234	0.480227	0.375566	1	0.886864	0.967077	0.836207	0.598888	0.509886	0.39513	0.300723	13.2909	-0.0722202	0.172228	0.973158	14.6821	-0.0732999	0.1654	0.995937	13.7337	-0.115373	0.411726	0.985873	14.5759	-0.0666203
O00148	DDX39A	11	12	1	0.969144	0.907737	0.751312	0.422881	0.190465	0.110423	0.0965603	1	0.992319	0.81415	0.82951	0.49565	0.259389	0.174392	0.174813	1	0.965229	0.932963	0.735102	0.433144	0.214567	0.10629	0.0840527	1	0.959366	0.966571	0.732324	0.464798	0.255938	0.181969	0.131571	11.0011	-0.129495	0	0.992498	11.8407	-0.109762	0.0178687	0.963248	11.0127	-0.127007	0	0.994939	11.3342	-0.109769
O00151	PDLIM1	27	20	1	0.975308	0.997142	0.896452	0.624541	0.619661	0.903962	1.35	1	1.07038	1.06508	0.909399	0.706941	0.722801	0.919801	1.24823	1	0.995465	1.04202	0.883532	0.631986	0.628369	0.888755	1.25557	1	0.992564	1.055	0.939927	0.742363	0.770651	0.992412	1.14537		-0.308328	0.874542	0.062348		-0.24584	0.899444	0.140782		-0.360809	0.851171	0.146343		-0.224968
O00154-7	ACOT7		38									1	0.979174	0.947359	0.806697	0.539766	0.441471	0.366239	0.167631									1	0.994999	0.988745	0.83938	0.574036	0.465876	0.336551	0.157099					13.1219	-0.0800912	0	0.982217					13.4852	-0.0831206
O00154	ACOT7	26		1	0.989976	0.899657	0.820433	0.514588	0.425513	0.419389	0.171882									1	1.06679	1.05682	0.844508	0.574898	0.473846	0.427463	0.186277									13.101	-0.0770985	0	0.961495					14.0078	-0.0754981	0	0.964669
O00159	MYO1C	32	35	1	1.13382	1.19894	0.871762	0.370825	0.106143	0.0531169	0.0669285	1	0.951577	1.05762	0.801902	0.36056	0.102289	0.0593896	0.0586387	1	1.06076	1.08104	0.789279	0.342025	0.106487	0.0618868	0.0603686	1	1.07648	1.0956	0.747762	0.330182	0.121755	0.078204	0.0612122	11.1548	-0.198815	0.0308405	0.966537	10.8756	-0.175603	0.00967274	0.994516	10.7552	-0.178458	0.0177875	0.992162	10.566	-0.171838
O00161	SNAP23	11	11	1	0.988702	0.990747	0.869876	0.61527	0.514799	0.696808	0.853701	1	1.08496	1.12781	1.01624	0.661049	0.605036	0.79133	0.944963	1	0.98898	1.06486	0.840928	0.641551	0.491784	0.695485	0.831235	1	1.05515	1.02623	0.991094	0.736651	0.773033	0.806527	0.823458		-0.832022	0.670145	0.746637		-0.196998	0.750588	0.652418		-0.851934	0.665014	0.770578		-1.47518
O00165-2	HAX1		3									1	1.12387	0.987304	0.90431	0.482175	0.283655	0.165677	0.0682367									1	1.11411	1.02112	0.819487	0.454379	0.223589	0.135461	0.0942144					12.1212	-0.131622	0.0202249	0.984825					11.5482	-0.133888
O00165	HAX1	6		1	1.02834	1.05372	0.818756	0.425863	0.164377	0.0462895	0.0294604									1	0.945618	0.947559	0.727972	0.37803	0.155358	0.0741329	0.0429595									11.2856	-0.160123	0	0.995579					10.6701	-0.147437	0	0.994899
O00170	AIP	24	22	1	0.95483	0.935793	0.825917	0.592476	0.559259	0.835631	0.963399	1	0.952233	0.980558	0.904296	0.642379	0.654077	0.836025	0.815642	1	1.01424	1.00969	0.874268	0.636828	0.596633	0.805093	0.900769	1	0.990384	1.05042	0.939465	0.720348	0.737606	0.808106	0.637015		-0.0918285	0.748892	0.406438		-0.692072	0.737031	0.746074		-0.689615	0.734831	0.675813		-0.7033
O00178	GTPBP1	20	20	1	0.985368	0.950754	0.817695	0.52938	0.377412	0.300962	0.125716	1	1.02364	0.988133	0.857352	0.560723	0.391808	0.268522	0.101866	1	0.974494	0.970441	0.815249	0.558633	0.402349	0.287433	0.126465	1	0.999937	0.990769	0.914758	0.565938	0.364058	0.223007	0.122946	12.6104	-0.092313	0	0.990036	12.9158	-0.0985716	0	0.992189	12.8329	-0.0916068	0	0.99117	12.9699	-0.10704
O00180	KCNK1	3		1	1.05256	1.05146	0.911677	0.515784	0.433316	0.467392	0.328555									1	1.40353	1.32893	1.16805	0.728961	0.548368	0.596414	0.527534									12.3658	-0.153872	0.394487	0.978254						-1.10429	0.557439	0.665399
O00186	STXBP3	18	10	1	0.99572	0.939635	0.79122	0.46585	0.213628	0.11757	0.0842688	1	0.984648	1.01143	0.8217	0.457773	0.19679	0.0847225	0.0579045	1	1.01547	1.0114	0.852066	0.479498	0.229672	0.125621	0.101661	1	0.956838	0.997143	0.798254	0.438221	0.211905	0.0934388	0.0436855	11.4412	-0.129259	0	0.996617	11.5016	-0.143974	0	0.998739	11.7776	-0.137503	0.0286977	0.999414	11.3454	-0.140163
O00189	AP4M1	10	6	1	1.01973	1.05746	0.842907	0.452821	0.233503	0.146767	0.121749	1	1.09994	1.07175	0.889049	0.515335	0.275047	0.192863	0.205417	1	0.984679	0.989966	0.811092	0.44961	0.235335	0.149162	0.114637	1	0.991852	1.01996	0.837957	0.476745	0.265082	0.177543	0.135433	11.5824	-0.143555	0.0732456	0.996528	12.0493	-0.145846	0.158175	0.98557	11.4982	-0.131069	0.0403789	0.999744	11.784	-0.129618
O00192	ARVCF	6	8	1	1.04386	1.08675	0.851192	0.471185	0.251555	0.197041	0.238098	1	0.934302	0.964619	0.761254	0.396604	0.183175	0.12855	0.163446	1	0.997159	0.996847	0.809093	0.430216	0.233711	0.201948	0.223522	1	1.00412	1.00683	0.736737	0.370778	0.207435	0.174375	0.168958	11.5815	-0.153467	0.184832	0.988404	10.8567	-0.149723	0.0911921	0.992317	11.184	-0.154314	0.177626	0.99816	10.6381	-0.155799
O00193	SMAP	11	12	1	0.846669	0.422788	0.413968	0.421453	0.339439	0.896425	0.719669	1	1.0503	1.21135	1.05401	0.736782	0.917018	0.933679	1.20552	1	1.91648	1.57881	1.63934	1.08417	0.822431	1.7304	2.65581	1	1.44813	1.17668	1.10156	1.26656	1.04676	1.24764	1.24302		-1.48211	0.535624	0.493889		-0.0208054	0.952905	0.0426724		0.234953	1.5	-0.241552		0.560669
O00194	RAB27B	2		1	1.03407	1.10623	0.963017	0.620366	0.669874	1.02675	1.42264									1	1.0036	0.975463	0.870959	0.678212	0.623234	0.927022	1.33492										-0.14748	0.934908	0.0343708
O00203	AP3B1	52	54	1	0.971534	0.93126	0.776936	0.41426	0.135458	0.039092	0.0323402	1	0.971763	0.97794	0.798155	0.396776	0.127962	0.0399882	0.0349703	1	1.02224	0.983576	0.812801	0.416821	0.145483	0.0507425	0.0393091	1	1.00648	0.985477	0.761984	0.352955	0.141833	0.0548227	0.0374965	10.9919	-0.158337	0	0.992585	11.0198	-0.165552	0	0.997333	11.1886	-0.160775	0	0.998126	10.7287	-0.161116
O00212	RHOD	2	1	1	1.03418	1.08833	0.902555	0.477823	0.275779	0.164709	0.11797	1	0.664474	1.15638	0.954313	0.529426	0.417525	0.250823	0.388341	1	0.918609	0.959193	0.806347	0.425781	0.23549	0.131978	0.147374	1	0.895071	0.9858	0.460176	0.389302	0.210756	0.234098	0.22213	11.9652	-0.145955	0.0921449	0.991326	12.3567	-0.165969	0.331593	0.803208	11.2963	-0.139224	0.076414	0.9912	8.97175	-0.181157
O00213	APBB1	3	2	1	1.18925	1.01248	0.920627	0.607944	0.435497	0.280269	0.356309	1	0.955902	1.05872	0.82416	0.443122	0.255469	0.161254	0.0997782	1	1.06884	0.991159	0.829335	0.461264	0.320467	0.293947	0.234398	1	1.06462	0.961164	0.664656	0.500366	0.23481	0.153446	0.124847	13.2812	-0.116693	0.28789	0.950175	11.5735	-0.132985	0.0486257	0.994068	11.6319	-0.136216	0.229892	0.993623	11.0233	-0.11015
O00214-2	LGALS8	14	8	1	0.990544	0.950277	0.827752	0.578432	0.489077	0.514347	0.379996	1	0.97281	0.965474	0.825471	0.580741	0.514705	0.49448	0.284518	1	1.02206	0.998895	0.853136	0.609946	0.518214	0.518916	0.342177	1	1.12993	1.11271	1.02909	0.669562	0.611705	0.455312	0.214478	14.9735	-0.078268	0.352097	0.981382	14.9943	-0.0621766	0	0.970474	15.5196	-0.0685703	0.256282	0.977286	15.9097	-0.0749345
O00217	NDUFS8	12	7	1	1.01949	0.969616	0.813869	0.46965	0.228457	0.0969373	0.0790577	1	1.04761	0.979844	0.812019	0.458703	0.226997	0.0824152	0.0620933	1	1.03957	0.950588	0.774522	0.470698	0.238578	0.127355	0.106883	1	1.01609	0.97873	0.795167	0.475009	0.225201	0.102328	0.0784073	11.5829	-0.133317	0	0.998127	11.5122	-0.137637	0	0.99649	11.4532	-0.121317	0	0.996243	11.5264	-0.131
O00219	HAS3	2		1	1.02602	0.902863	0.725938	0.448253	0.193937	0.0565183	0.0125117									1	0.966649	0.919774	0.710925	0.40422	0.181674	0.0701412	0.0259739									10.9383	-0.139317	0	0.984463					10.6873	-0.14063	0	0.991085
O00220	TNFRSF10A	9	6	1	1.25742	0.898539	0.901563	0.66371	0.717064	1.10584	1.45488	1	1.03196	1.01413	0.927299	0.624978	0.624769	0.88398	1.13117	1	1.01274	1.0266	0.853558	0.649189	0.657725	1.09723	1.44938	1	1.0914	1.13018	1.00673	0.80805	0.79054	0.984116	1.0529		-0.150801	0.956934	0.0223671		-0.472491	0.816224	0.27573		-0.286	0.941416	0.0195815		-0.0773884
O00221	NFKBIE	3	3	1	0.887432	1.12707	0.990494	0.708043	0.658239	0.917166	0.69552	1	1.02989	0.901352	0.803904	0.631679	0.608047	0.629358	0.497031	1	0.989044	1.04807	0.756521	0.594385	0.53721	0.676736	0.574891	1	1.15767	1.06202	0.906979	0.78682	0.797713	0.614787	0.517715		-0.697076	0.744742	0.653555		-0.0477358	0.263074	0.966266		-1.18424	0.595806	0.958557		-0.0389094
O00231	PSMD11	54	65	1	1.0161	0.962982	0.817465	0.546069	0.325978	0.115724	0.0451623	1	0.919986	0.923847	0.822888	0.559571	0.273404	0.083549	0.0514933	1	1.00476	0.971525	0.855565	0.547931	0.313731	0.123599	0.0550166	1	1.01538	1.02469	0.819979	0.506927	0.24714	0.085423	0.0575538	12.2015	-0.1218	0	0.989716	12.1429	-0.131388	0	0.980793	12.3435	-0.125317	0	0.995198	11.8234	-0.134748
O00232-2	PSMD12		1									1	1.50392	1.28283	1.04627	0.509742	0.307756	0.0905918	0									1	1.18702	0.940354	0.995496	0.567362	0.3006	0.110232	0					12.5114	-0.158148	0	0.840744					12.7069	-0.151763
O00232	PSMD12	56	42	1	0.997079	1.00226	0.826458	0.550477	0.322127	0.129711	0.0598942	1	0.989332	0.941506	0.80374	0.546438	0.287837	0.0864631	0.035508	1	0.998184	0.958825	0.838028	0.545063	0.318662	0.128138	0.0676426	1	1.00406	0.975673	0.853076	0.536526	0.249278	0.0946036	0.0501272	12.2819	-0.120473	0	0.993846	12.0217	-0.128551	0	0.986689	12.2795	-0.120867	0	0.994156	12.1012	-0.137642
O00233	PSMD9	17	14	1	0.944182	0.934267	0.786037	0.588136	0.561482	0.911063	1.38096	1	0.865549	1.01437	0.93235	0.640637	0.680267	0.933153	1.33545	1	1.00699	1.00584	0.877722	0.623719	0.603251	0.953171	1.45021	1	1.03194	1.07797	0.937247	0.748511	0.783751	1.03753	1.15883		-0.397267	0.845535	0.0506954		-0.241353	0.897376	0.00602886		-0.35216	0.901615	0.0401995		-0.127655
O00244	ATOX1	5	6	1	1.06815	0.985279	0.903878	0.663891	0.695372	1.09939	1.50365	1	1.01736	1.12438	0.936145	0.828631	0.923477	1.21375	1.63003	1	1.18771	1.10506	1.05514	0.730188	0.756144	1.06697	1.69613	1	1.04157	1.03015	0.933474	0.887323	0.964251	1.12992	1.46085		-0.0621288	0.973236	0.00619649		0	1.5	0.836761			1.11947	0.0101774		0
O00255	MEN1	4	3	1	1.03673	0.871962	0.721785	0.481385	0.284132	0.287629	0.31642	1	1.062	1.01838	0.796735	0.370761	0.175929	0.0983233	0.0811093	1	0.951029	0.945826	0.80031	0.503616	0.311466	0.248863	0.284353	1	1.05069	0.945338	0.740922	0.403707	0.184273	0.0916819	0.0738085	11.4324	-0.0920162	0.120251	0.978601	10.9596	-0.158786	0.0395582	0.996663	11.8137	-0.118697	0.204158	0.990312	10.8789	-0.136653
O00257	CBX4	4	10	1	1.03228	0.903533	0.662665	0.315709	0.147473	0.0989075	0.108296	1	1.06981	1.06047	0.766062	0.419726	0.321831	0.393448	0.447149	1	1.03027	1.01047	0.736657	0.340024	0.161107	0.120483	0.0945781	1	1.05615	0.956403	0.772097	0.494547	0.365593	0.373589	0.414495	10.0764	-0.1374	0	0.994286	10.3003	-0.255962	0.390297	0.977219	10.5522	-0.160716	0.0598837	0.998842	11.6217	-0.137152
O00258	WRB	3	1	1	1.04999	1.06152	0.932678	0.515541	0.311964	0.257617	0.221892	1	1.08088	1.02752	0.832599	0.466677	0.41835	0.586072	0.582403	1	1.04282	1.08148	0.875904	0.464442	0.265361	0.198666	0.15273	1	1.01835	0.996322	0.847165	0.497818	0.494579	0.499063	0.55318	12.1694	-0.157302	0.219773	0.993348		-1.30958	0.513375	0.943	11.7476	-0.148639	0.135365	0.992089		-1.44119
O00264	PGRMC1	11	9	1	0.948485	1.00332	0.849555	0.56994	0.542873	0.862138	1.13751	1	1.05988	1.05248	1.00043	0.724811	0.756354	0.953281	1.21572	1	1.0366	1.1065	0.944079	0.627411	0.60604	0.942994	1.25725	1	1.08158	1.09595	0.976266	0.956531	0.866773	1.19867	1.07446		-0.535226	0.778115	0.232813		-0.179946	0.912542	0.128718		-0.327856	0.858423	0.155769		0.0221929
O00267-2	SUPT5H	1		1	1.13122	1.0836	0.871893	0.568489	0.481499	0.213416	0.0533324									1	1.09956	1.06966	0.891293	0.542787	0.482125	0.225655	0.0612486									13.2016	-0.103713	0	0.956285					13.1564	-0.102548	0	0.962238
O00267	SUPT5H	46	60	1	0.98266	1.01355	0.870873	0.602596	0.477156	0.217214	0.0587507	1	0.981538	0.990822	0.870653	0.621506	0.465573	0.191001	0.0815802	1	0.956723	0.976377	0.819587	0.592431	0.449866	0.213183	0.0684176	1	0.97512	1.00271	0.908646	0.648974	0.398135	0.151067	0.0870214	13.3751	-0.103518	0	0.977343	13.4068	-0.105237	0	0.982899	13.0052	-0.100347	0	0.976075	13.3585	-0.119454
O00268	TAF4	14	7	1	0.933622	1.02582	0.851035	0.519053	0.361203	0.286692	0.19824	1	1.18966	1.11448	0.994924	0.61265	0.415542	0.319586	0.286964	1	1.02629	1.01756	0.887254	0.561582	0.367937	0.266089	0.226974	1	0.989271	1.03605	0.926588	0.619482	0.412922	0.359785	0.221979	12.432	-0.109235	0.147557	0.99129	13.1661	-0.140898	0.289445	0.947187	12.747	-0.113163	0.166979	0.998524	13.6411	-0.0994841
O00273	DFFA	23	22	1	0.975171	0.960233	0.841908	0.612892	0.599153	0.956657	1.19474	1	0.741123	0.822067	0.745298	0.619606	0.654331	0.667645	0.674675	1	1.01787	1.04605	0.903986	0.670355	0.637567	0.972417	1.14603	1	0.949132	0.986955	0.773957	0.769461	0.636836	0.918742	0.668659		-0.229789	0.841069	0.124764			0.303586	0.815015		-0.337611	0.856592	0.200171		-0.106153
O00287	RFXAP	1		1	1.02214	1.02572	0.809499	0.580346	0.503096	0.591301	0.745329									1	1.07229	0.987689	0.924146	0.570681	0.475545	0.612314	0.788249										-1.05691	0.605018	0.900378						-1.09212	0.611697	0.841378
O00291	HIP1	14	13	1	1.00837	1.01494	0.860918	0.557655	0.36274	0.233733	0.23799	1	0.837413	0.971616	0.843802	0.56109	0.333003	0.155124	0.104856	1	0.967818	0.977586	0.841042	0.531806	0.327873	0.234795	0.199811	1	0.940918	0.991411	0.737836	0.544714	0.283058	0.163747	0.104512	12.6217	-0.110303	0.146833	0.998009	12.4775	-0.11324	0	0.96825	12.3242	-0.110179	0.107483	0.998449	11.786	-0.109167
O00299	CLIC1	63	52	1	0.980871	1.00431	0.902796	0.633368	0.629946	0.909735	0.956903	1	0.862654	0.910455	0.850757	0.706426	0.757042	0.818884	0.546764	1	1.02005	1.04421	0.91544	0.653488	0.653335	0.921957	0.804654	1	0.980938	1.01743	0.872917	0.805676	0.717495	0.892803	0.358711		-0.55412	0.782488	0.457905		-0.0322947	0.0788168	0.607903		-0.992331	0.758359	0.690641		-0.0384771
O00303	EIF3F	36	25	1	1.02702	1.00949	0.799437	0.552115	0.33768	0.194422	0.0825964	1	0.951675	0.956413	0.810251	0.569964	0.331393	0.162365	0.0724676	1	1.05653	1.03146	0.865113	0.564558	0.363278	0.201859	0.0872817	1	1.02664	1.02605	0.860251	0.579855	0.306511	0.14763	0.0849938	12.314	-0.10791	0	0.993574	12.3685	-0.11268	0	0.989108	12.7404	-0.10965	0	0.992535	12.555	-0.121277
O00308	WWP2	2	6	1	1.07788	1.20458	0.79704	0.461413	0.306077	0.174663	0.193732	1	0.884247	0.986301	0.778404	0.492721	0.244221	0.13551	0.107858	1	1.02054	1.10903	0.908059	0.484918	0.341908	0.182188	0.163169	1	0.986675	1.02192	0.771457	0.51656	0.235596	0.208029	0.123776	11.5739	-0.132538	0.138577	0.956688	11.6126	-0.119869	0	0.98489	12.1544	-0.136249	0.130803	0.984208	11.7849	-0.11104
O00311	CDC7	5	5	1	1.01658	0.89611	0.754728	0.442853	0.24062	0.164797	0.147862	1	0.96795	0.985561	0.750614	0.410055	0.241561	0.180798	0.182021	1	1.05572	1.01257	0.804269	0.458241	0.249753	0.17235	0.109284	1	0.915967	0.909508	0.721751	0.407235	0.254421	0.154991	0.134676	11.2258	-0.111352	0	0.992318	10.9653	-0.137133	0.124781	0.998447	11.5847	-0.124528	0.0326266	0.996698	10.9223	-0.112779
O00327	ARNTL	4	3	1	0.989331	1.0143	0.793211	0.453221	0.269608	0.318072	0.27624	1	1.03939	1.00896	0.978397	0.560754	0.365216	0.407367	0.45888	1	1.00999	1.00163	0.800955	0.437644	0.297331	0.299342	0.274998	1	0.88479	1.04257	0.858355	0.493033	0.328242	0.334561	0.379409	11.2229	-0.149995	0.262314	0.994916	12.0644	-1.5161	0.410488	0.98996	11.2012	-0.152941	0.263576	0.999151	11.6968	-0.158039
O00329	PIK3CD	2		1	1.21955	1.0689	0.976619	0.552536	0.306067	0.106144	0.120555									1	0.925637	1.00657	0.867873	0.610013	0.249182	0.101907	0.0422062									12.5545	-0.151824	0.0680515	0.958971					12.5613	-0.14373	0	0.990155
O00330	PDHX	19	22	1	1.01014	1.00087	0.844508	0.590496	0.546384	0.67291	0.483414	1	1.06177	1.04323	0.935898	0.637349	0.607972	0.667826	0.296963	1	1.03602	1.03436	0.875639	0.641692	0.557359	0.660172	0.399471	1	1.08818	1.04659	0.960528	0.712027	0.65698	0.637011	0.271296		-0.154128	0.566142	0.94536	17.8261	-0.0524266	0	0.875264		-0.0723679	0.460539	0.919773	17.8308	-0.0573145
O00338-2	SULT1C2	1		1	1.04253	1.0229	0.774788	0.41687	0.21027	0.15137	0.164942									1	0.884155	0.801789	0.630685	0.336114	0.209224	0.134328	0.082453									11.0533	-0.145742	0.105045	0.996331					9.63206	-0.119853	0	0.967876
O00391	QSOX1	3	1	1	1.12254	1.16993	0.859458	0.530219	0.436053	0.462302	0.64922	1	1.12786	1.05045	0.86655	0.503497	0.424097	0.435626	0.406458	1	0.84799	0.957998	0.796365	0.427176	0.394432	0.393627	0.454238	1	1.06673	1.06283	1.01615	0.686145	0.598294	0.493068	0.484967		-0.260509	0.517833	0.885979	12.0349	-0.160603	0.414379	0.971898	10.3388	-0.284215	0.414515	0.944959		-0.113477
O00399	DCTN6	8	8	1	0.976814	1.05636	0.948651	0.598809	0.531028	0.776594	1.12764	1	0.99758	1.00733	0.885337	0.591565	0.599819	0.867226	1.01342	1	0.959119	0.951789	0.830027	0.609479	0.518349	0.727257	0.946292	1	1.00575	1.02156	0.942896	0.680207	0.671107	0.82925	0.881852		-0.671434	0.758518	0.34548		-0.593954	0.768007	0.420021		-0.765321	0.700344	0.534642		-0.838056
O00400	SLC33A1	7	5	1	1.04381	0.942549	0.870016	0.496992	0.244795	0.129775	0.0774384	1	1.06283	1.02996	0.862117	0.483955	0.35786	0.273326	0.20056	1	1.0333	1.01812	0.857638	0.493078	0.253252	0.138991	0.0859818	1	1.01328	0.923745	0.837422	0.503402	0.414487	0.251778	0.179038	11.9809	-0.132292	0	0.99588	12.1016	-0.12352	0.185617	0.991589	11.9634	-0.128811	0.00139207	0.998626	12.6425	-0.0903202
O00401	WASL	14	15	1	0.950109	0.993654	0.847439	0.615764	0.570351	0.801447	0.721418	1	0.969928	0.929519	0.893419	0.630547	0.690247	0.719517	0.499924	1	0.947908	1.00458	0.86691	0.605	0.585367	0.776708	0.585045	1	1.00522	0.998156	0.954926	0.809069	0.727997	0.772008	0.435031		-0.920658	0.677245	0.818901		-0.0367713	0	0.855653		-1.06328	0.63803	0.880149		-0.0410946
O00409	FOXN3		1									1	1.08	0.941393	0.884718	0.594996	0.165164	0.0115627	0									1	0.824148	0.674576	0.687559	0.307992	0.237893	0.135199	0					12.3927	-0.19741	0	0.986669					9.13541	-0.118792
O00410-3	IPO5	123	96	1	1.00308	0.946642	0.838214	0.595051	0.508739	0.536782	0.247743	1	0.932663	0.943491	0.866697	0.627469	0.563876	0.435474	0.135838	1	1.05652	1.06237	0.946728	0.644715	0.550921	0.529494	0.231512	1	1.0011	1.04111	0.863606	0.65657	0.569017	0.434738	0.130977	15.1185	-0.0620933	0	0.946755	14.6614	-0.0747912	0	0.935597	15.8129	-0.0664431	0	0.941949	14.8668	-0.0766198
O00411	POLRMT	40	30	1	0.993519	0.954768	0.669274	0.278028	0.0959826	0.0571516	0.0552201	1	0.835193	0.891532	0.658387	0.297368	0.138317	0.115708	0.127919	1	1.04826	0.94684	0.670235	0.265934	0.10032	0.0640433	0.0678079	1	0.996976	0.903699	0.636056	0.309854	0.171032	0.143732	0.138085	10.0258	-0.167808	0	0.998739	9.95362	-0.145098	0.0360369	0.963901	9.98212	-0.173593	0.0175101	0.996676	9.90019	-0.134419
O00418	EEF2K	9	9	1	1.00952	0.991509	0.846778	0.530636	0.260159	0.144238	0.101778	1	1.05774	1.00713	0.847602	0.469902	0.211637	0.0753519	0.0517749	1	0.977357	0.978404	0.838511	0.510959	0.260429	0.150487	0.0689725	1	1.02901	1.0623	0.851046	0.440777	0.209229	0.0923172	0.0640236	12.1284	-0.123125	0	0.999343	11.675	-0.146591	0	0.996514	11.9911	-0.125123	0	0.998398	11.5677	-0.14689
O00422	SAP18	6	8	1	0.95361	0.902414	0.697469	0.427148	0.229872	0.161073	0.0774583	1	0.811291	0.863528	0.706211	0.412567	0.249607	0.135091	0.0956915	1	0.989172	0.892813	0.671999	0.376646	0.219781	0.171901	0.093927	1	0.926557	0.889708	0.660154	0.40851	0.251771	0.176073	0.0987146	10.7941	-0.117085	0	0.991398	10.7316	-0.115665	0	0.946194	10.4154	-0.117313	0	0.995462	10.5076	-0.111342
O00423-3	EML1	9	2	1	0.994	0.986097	0.770402	0.495892	0.297772	0.241144	0.191132	1	1.35855	1.00276	0.795966	0.551506	0.330426	0.13268	0.0715354	1	0.968342	0.96655	0.789657	0.472522	0.283591	0.250396	0.171644	1	0.98871	0.856222	0.930034	0.536612	0.343174	0.29823	0.0813884	11.791	-0.106884	0.0860425	0.999318	12.1862	-0.115383	0	0.90714	11.6692	-0.114394	0.103368	0.99703	12.8686	-0.104626
O00425	IGF2BP3	21	19	1	1.07216	1.07047	0.876747	0.4914	0.238953	0.0868219	0.0231776	1	1.05137	1.09821	0.901286	0.493907	0.212819	0.0745717	0.0371387	1	1.03631	0.988205	0.802953	0.476539	0.223356	0.0921467	0.0396823	1	1.10812	1.04073	0.878649	0.463817	0.201983	0.0739242	0.0426859	11.9368	-0.147809	0	0.990937	11.9683	-0.156899	0	0.991006	11.552	-0.137404	0	0.996171	11.7382	-0.155037
O00429-2	DNM1L	51	39	1	1.0052	0.986761	0.835001	0.502202	0.234295	0.0889656	0.0445747	1	0.988242	0.956265	0.804816	0.465237	0.195531	0.0603731	0.0375306	1	0.967832	0.947645	0.793302	0.473282	0.230978	0.0967882	0.0511429	1	0.988804	0.97574	0.791162	0.421093	0.170021	0.0665928	0.0415663	11.8266	-0.139005	0	0.997482	11.4346	-0.146028	0	0.995189	11.4995	-0.133023	0	0.994591	11.1536	-0.150267
O00442-2	RTCA	18	14	1	0.974665	0.947328	0.826736	0.561377	0.466049	0.542182	0.157709	1	0.885823	0.954199	0.792253	0.568948	0.43735	0.250421	0.0647829	1	1.03626	1.05155	0.894619	0.609619	0.514684	0.561363	0.154266	1	0.97697	0.998974	0.838005	0.639032	0.370278	0.280472	0.0946736	14.1483	-0.0691187	0	0.911854	12.7457	-0.0959567	0	0.957948	15.0858	-0.0691792	0	0.909697	13.214	-0.0992747
O00443	PIK3C2A	26	19	1	1.1769	1.27173	1.04107	0.529788	0.32362	0.269836	0.182892	1	1.15767	1.2393	1.03436	0.549788	0.31868	0.228991	0.196871	1	1.13216	1.20826	0.953002	0.503991	0.296585	0.227941	0.173483	1	1.1844	1.25532	0.945675	0.511141	0.318861	0.243885	0.204905	12.2516	-0.213779	0.238017	0.916812	12.3823	-0.199375	0.219197	0.934576	12.1274	-0.166853	0.184892	0.951792	12.184	-0.160917
O00458	IFRD1	5	3	1	1.00547	1.02454	0.912519	0.566901	0.445017	0.482006	0.535279	1	1.14622	1.09544	0.890833	0.573704	0.369367	0.279321	0.119737	1	1.01456	1.03594	0.839623	0.564804	0.502333	0.515699	0.404868	1	1.08136	1.12986	1.03133	0.605147	0.490674	0.33237	0.167855	14.4042	-0.160174	0.48674	0.98791	13.0944	-0.100623	0	0.967605	14.4031	-0.108471	0.444622	0.985275	14.1912	-0.0960268
O00459	PIK3R2	21	13	1	0.981891	1.05983	0.882398	0.537924	0.305752	0.147435	0.148438	1	1.0096	1.04537	0.8783	0.535231	0.281292	0.160545	0.122182	1	0.99334	0.973068	0.850099	0.517846	0.278477	0.158239	0.110869	1	1.0282	1.01994	0.93153	0.51352	0.252153	0.146877	0.131445	12.3575	-0.126119	0.0568978	0.994607	12.2929	-0.126836	0.0395441	0.997758	12.1402	-0.118634	0	0.999492	12.1306	-0.159324
O00461	GOLIM4	11	8	1	1.0097	1.02898	0.909072	0.609418	0.631459	0.935606	1.32587	1	1.07598	1.02788	0.877399	0.66426	0.684455	0.993094	1.24597	1	0.966407	1.0044	0.835323	0.629542	0.6266	0.868641	1.2117	1	1.03313	1.00944	0.981144	0.866236	0.88428	1.09538	1.16024		-0.299932	0.875587	0.0874968		-0.626289	0.893036	0.125332		-0.364253	0.83412	0.164636		-0.00693995
O00462	MANBA	23	13	1	1.01888	0.980926	0.843639	0.561388	0.430083	0.4959	0.626865	1	0.992471	1.01053	0.860859	0.533006	0.40417	0.468586	0.545296	1	0.984756	0.992682	0.81441	0.565693	0.429312	0.49207	0.585332	1	1.00598	1.02968	0.935732	0.610593	0.475023	0.428779	0.409405		-0.182246	0.521809	0.947911	12.6735	-0.178322	0.475181	0.976902		-0.156156	0.505955	0.965479	13.8512	-0.120281
O00463	TRAF5	4	3	1	0.953309	0.955254	0.859014	0.539576	0.453951	0.460523	0.348507	1	1.16537	1.18041	0.91268	0.665203	0.498078	0.36502	0.279534	1	0.989475	0.948409	0.865512	0.586025	0.482146	0.464449	0.29993	1	0.979016	1.18715	0.945908	0.619744	0.49251	0.51023	0.235695	13.0932	-0.112493	0.378253	0.981861	14.6033	-0.0840589	0.151779	0.929863	14.6278	-0.0697524	0.131642	0.98055	14.8059	-0.0814854
O00468	AGRN	8	3	1	0.955903	0.923509	0.817308	0.493364	0.394546	0.425134	0.370543	1	0.944438	1.04353	0.838857	0.545139	0.446689	0.422137	0.169	1	0.965287	1.04365	0.862332	0.523993	0.380164	0.433156	0.301389	1	1.07293	1.16399	0.861146	0.610212	0.561827	0.313355	0.171066	11.9023	-0.13952	0.378756	0.983042	13.6055	-0.0783297	0	0.961577	12.3492	-0.129514	0.3382	0.983576	14.244	-0.0820042
O00469-2	PLOD2	11	10	1	1.04523	1.00511	0.87141	0.596205	0.420634	0.255894	0.126522	1	0.958323	0.947956	0.884964	0.60534	0.502412	0.350551	0.210697	1	0.964502	1.01122	0.84057	0.58744	0.393051	0.261554	0.102632	1	1.00694	0.979535	0.888741	0.749865	0.462673	0.306621	0.254475	13.2749	-0.0968177	0	0.993163	14.1693	-0.0776706	0	0.985088	12.9953	-0.0983525	0	0.991223	14.694	-0.0844742
O00471	EXOC5	18	12	1	1.02177	0.995526	0.7631	0.37645	0.114557	0.0656453	0.0715882	1	1.03496	0.961867	0.806702	0.41946	0.198031	0.146719	0.153141	1	1.02392	0.967003	0.778523	0.364502	0.123056	0.0682118	0.0636971	1	0.91976	0.890142	0.733558	0.376009	0.194371	0.183403	0.128835	10.7952	-0.158151	0	0.997535	11.1689	-0.150625	0.0975732	0.996789	10.8191	-0.160776	0.00182644	0.998143	10.7147	-0.12637
O00472	ELL2		1									1	1.28356	1.07764	0.923943	0.660409	0.253796	0.00387561	0.101171									1	0.993088	0.848986	1.00313	0.55849	0.14256	0.113767	0.0765075					12.892	-0.174583	0.00641173	0.93967					12.2247	-0.271979
O00478	BTN3A3	1		1	1.09994	0.97336	0.85753	0.505004	0.392894	0.347763	0.163422									1	0.963848	0.943959	0.828125	0.533894	0.375576	0.327551	0.168427									12.7922	-0.0925925	0.068303	0.974262					12.8029	-0.0871698	0	0.989259
O00483	NDUFA4	11	4	1	1.12652	1.36224	1.18072	0.65709	0.366898	0.249239	0.188158	1	1.11911	1.21391	0.973366	0.646788	0.361397	0.180456	0.104109	1	1.12604	1.18517	1.1015	0.667217	0.400296	0.257692	0.167995	1	1.18708	1.18332	1.0296	0.665897	0.376304	0.15797	0.155893	13.1539	-0.176462	0.214094	0.872939	13.3792	-0.124849	0.0149124	0.954392	13.5908	-0.139332	0.162777	0.943079	13.4182	-0.141848
O00487	PSMD14	25	26	1	1.00792	0.915717	0.809651	0.543311	0.326853	0.140096	0.0343039	1	1.04635	0.988083	0.893048	0.567267	0.341779	0.169189	0.15144	1	1.04048	1.0019	0.867023	0.575332	0.340984	0.142282	0.0529397	1	1.04221	0.992164	0.894449	0.564288	0.324364	0.171786	0.157745	12.1564	-0.118648	0	0.984112	12.7196	-0.114392	0.0300146	0.996453	12.6289	-0.122235	0	0.993421	12.6127	-0.120242
O00488	ZNF593	5	1	1	0.987458	1.08796	0.866298	0.498242	0.346947	0.36008	0.285195	1	1.11154	1.03564	1.09474	0.642972	0.654593	0.479236	0.441383	1	0.988837	0.966917	0.815321	0.489029	0.335405	0.337275	0.249242	1	1.1282	0.773166	0.945499	0.765919	0.403493	0.177433	0.264788	11.9577	-0.142576	0.299449	0.987098		-0.185446	0.518789	0.913634	11.9035	-0.119983	0.237995	0.995573	13.8401	-0.152562
O00499-2	BIN1	18	19	1	0.948921	0.946976	0.819718	0.587794	0.56858	0.504409	0.114895	1	1.0751	1.07763	0.963576	0.690663	0.692344	0.439415	0.182199	1	1.00542	0.993343	0.896308	0.638852	0.576658	0.475538	0.164846	1	1.05676	1.08885	1.00105	0.778351	0.719496	0.366959	0.164672	14.4968	-0.0695536	0	0.893975	16.1582	-0.0767048	0	0.933847	15.1924	-0.0715537	0	0.948446	16.3752	-0.0992273
O00505	KPNA3	16	9	1	0.982958	1.06754	0.912147	0.550243	0.371846	0.249377	0.143323	1	0.832608	0.89729	0.838914	0.600805	0.369996	0.218169	0.151176	1	1.00024	1.0064	0.880627	0.566667	0.362419	0.228832	0.137644	1	0.895588	1.01097	0.877728	0.616081	0.338506	0.220004	0.100598	12.8692	-0.110266	0.0689352	0.990908	12.8934	-0.0979159	0	0.949154	12.8929	-0.102882	0	0.999035	13.0082	-0.110107
O00506	STK25	5	9	1	0.870985	1.05346	0.79335	0.364541	0.0958953	0.0390279	0.0488234	1	0.988326	0.968234	0.756656	0.344217	0.138537	0.072531	0.0817224	1	0.944099	0.846074	0.691897	0.340066	0.112442	0.0558185	0.0579113	1	1.03195	0.962518	0.760443	0.371239	0.14413	0.0769728	0.0578679	10.8548	-0.175478	0	0.983694	10.6495	-0.161275	0.0216779	0.998718	10.2272	-0.150847	0	0.979244	10.7948	-0.152317
O00507	USP9Y	2		1	0.936229	0.792566	0.652311	0.501228	0.329132	0.203154	0.119268									1	0.897831	0.965499	0.81721	0.637686	0.384969	0.231286	0.165374									10.6287	-0.0952779	0	0.960547					13.1389	-0.0941834	0	0.979811
O00512	BCL9	11	17	1	0.954637	1.01179	0.895741	0.608548	0.559439	0.821319	1.09927	1	1.0689	1.10225	0.983092	0.66144	0.653996	0.882491	1.05895	1	1.07653	1.13216	0.978454	0.655329	0.642513	0.830914	1.16335	1	1.06572	1.13946	1.02955	0.778254	0.765935	0.899116	0.955639		-0.56687	0.772144	0.305891		-0.487714	0.814219	0.42454		-0.470699	0.823026	0.314802		-0.099717
O00515	LAD1	21	21	1	1.00143	0.932062	0.765978	0.517299	0.298648	0.175889	0.147724	1	1.0375	1.04055	0.86045	0.558709	0.329015	0.181316	0.153662	1	0.998343	0.976244	0.82937	0.528233	0.320484	0.202337	0.181981	1	0.995089	0.995931	0.880115	0.598185	0.366994	0.200437	0.160512	11.8253	-0.104119	0	0.995592	12.5691	-0.111094	0.0256307	0.995987	12.2564	-0.1081	0.0575579	0.999214	13.0362	-0.103273
O00519	FAAH	9	3	1	1.01187	1.00925	0.826841	0.480088	0.26832	0.178782	0.126918	1	1.25492	1.13321	0.977873	0.487926	0.368979	0.325956	0.131327	1	1.04028	1.00399	0.843837	0.472136	0.272068	0.164615	0.115113	1	1.07416	1.00751	0.828107	0.497621	0.361592	0.295921	0.165321	11.8082	-0.123426	0.0494725	0.999593	12.2861	-0.15233	0.216461	0.916609	11.8281	-0.127075	0.0445432	0.998224	12.3529	-0.101609
O00522	KRIT1	8	4	1	0.992672	0.907631	0.814448	0.429551	0.189951	0.0993063	0.084257	1	0.910596	1.00977	0.83227	0.45524	0.250861	0.08094	0.104858	1	0.9832	1.01487	0.821628	0.461734	0.217954	0.108573	0.0789	1	0.938796	1.00494	0.791574	0.437732	0.213374	0.10843	0.0957544	11.3236	-0.139139	0	0.993156	11.6427	-0.133251	0.00152602	0.989858	11.5807	-0.135276	0	0.999119	11.3445	-0.132564
O00534	VWA5A	5	4	1	1.0037	1.13569	0.965961	0.636404	0.739607	0.682932	0.744227	1	1.12551	1.05376	0.863566	0.585995	0.500715	0.452132	0.204043	1	0.955825	1.0015	0.871954	0.626613	0.6643	0.688488	0.393298	1	1.08214	1.06614	0.987992	0.723198	0.597391	0.397721	0.206356		-0.78607	0.700793	0.888925	14.4517	-0.0719884	0	0.948261	20.7849	-0.0433623	0	0.865364	15.6961	-0.0811031
O00541	PES1	23	17	1	1.01977	1.03672	0.837198	0.52531	0.42692	0.373315	0.0787123	1	0.996006	0.960364	0.829562	0.552156	0.436459	0.251009	0.116056	1	1.02836	1.00986	0.878477	0.540966	0.433531	0.33872	0.0922865	1	0.97781	0.994455	0.868372	0.569628	0.435795	0.263009	0.117216	13.0256	-0.0895086	0	0.963084	12.8857	-0.093937	0	0.987775	13.2096	-0.0920585	0	0.975333	13.1795	-0.0955058
O00559	EBAG9		1									1	1.46151	1.3385	0.845399	0.648935	0.614222	0.742957	0.73239									1	0.845839	0.769728	0.958531	0.586907	0.450735	0.328557	0.411026						-0.924437	0.684626	0.524384					13.0638	-0.143274
O00560	SDCBP	9	8	1	1.09116	1.17179	0.939357	0.597011	0.599795	0.672994	0.890411	1	0.979485	0.993944	0.803323	0.576199	0.526401	0.676499	0.656456	1	0.934949	1.00312	0.808244	0.546843	0.452269	0.575742	0.687854	1	1.01711	1.11819	0.905737	0.701051	0.610735	0.689169	0.546536		-0.796833	0.690053	0.727202		-1.65213	0.608889	0.943042		-1.13584	0.565677	0.901048		-0.0826147
O00562	PITPNM1	14	8	1	0.979495	1.05335	0.872634	0.58735	0.450102	0.263927	0.167987	1	1.04824	0.998435	0.833074	0.594859	0.406282	0.269864	0.194218	1	0.978222	0.982139	0.856967	0.591728	0.399841	0.244152	0.122184	1	1.00987	1.03555	0.862375	0.602356	0.44132	0.305696	0.163425	13.4513	-0.0910408	0	0.990384	13.2052	-0.0882541	0	0.996506	13.0814	-0.098462	0	0.995502	13.5625	-0.087902
O00566	MPHOSPH10	5	8	1	0.957088	0.997482	0.719032	0.214474	0.0907839	0.0719037	0.0442758	1	0.99246	1.01727	0.727205	0.322519	0.128364	0.117075	0.127821	1	0.909572	0.902943	0.560902	0.202887	0.0930287	0.0625849	0.0345507	1	0.995048	0.931945	0.652319	0.278427	0.135354	0.102006	0.105541	10.0114	-0.220763	0.0433688	0.998555	10.3582	-0.178707	0.0865497	0.997862	9.24206	-0.170111	0	0.990588	9.91464	-0.162728
O00567	NOP56	15	19	1	1.02893	0.934067	0.573071	0.21407	0.0877463	0.0565094	0.0580592	1	0.955159	0.911966	0.590302	0.238835	0.115101	0.0985135	0.0872708	1	0.985438	0.86589	0.54435	0.20836	0.0904503	0.063345	0.0565732	1	0.992824	0.907156	0.585773	0.236697	0.135012	0.10219	0.104027	9.38032	-0.17271	0.0021051	0.998206	9.46598	-0.158007	0.0209868	0.995369	9.02753	-0.16076	0	0.994636	9.42255	-0.155722
O00571	DDX3X	39	42	1	0.970084	0.845562	0.660223	0.300022	0.0802007	0.0415393	0.0504485	1	0.919501	0.843876	0.668966	0.293308	0.07585	0.0557946	0.0561904	1	1.00623	0.927541	0.712761	0.303785	0.0868709	0.0587068	0.0568662	1	0.987594	0.874065	0.640727	0.271882	0.0965539	0.0815568	0.0664304	9.92127	-0.160994	0	0.982092	9.951	-0.161259	0	0.976296	10.2783	-0.168497	0	0.995815	9.76586	-0.15409
O00584	RNASET2	11	9	1	0.969936	1.0404	0.88821	0.639002	0.633069	0.909288	1.33287	1	0.998122	0.987752	0.874419	0.704569	0.704775	0.927332	1.21527	1	0.968043	0.979836	0.856337	0.637454	0.631537	0.883987	1.16818	1	0.987165	1.0352	0.929841	0.787171	0.74712	0.940744	1.01702		-0.275701	0.878558	0.0797523						-0.0971759	0.834724	0.170513		-0.310562
O00592	PODXL	8	11	1	1.00407	1.01669	0.891153	0.627712	0.673926	0.998219	1.45084	1	0.755441	0.817145	0.772707	0.714381	0.764549	0.817109	1.04926	1	1.01843	1.02122	0.906805	0.654676	0.66949	1.04131	1.47222	1	0.94231	0.937701	0.803384	0.771641	0.714314	1.14814	0.985853		-0.214432	0.928371	0.0256104						-0.181415	0.9489	0.0158302		-0.311194
O00623	PEX12		2									1	1.2475	1.13095	0.906232	0.451505	0.253022	0.218371	0.151228									1	1.02524	1.05621	0.877143	0.337619	0.210567	0.162637	0.0568885					11.6835	-0.168645	0.162259	0.94312					11.0503	-0.19375
O00625	PIR	20	21	1	0.968502	1.04499	0.880781	0.620517	0.646686	0.915148	1.34705	1	1.04886	1.034	0.897997	0.659788	0.711161	1.00456	1.27994	1	0.99608	1.01315	0.908113	0.609495	0.611076	0.860828	1.20261	1	0.97372	1.04793	0.929544	0.790635	0.82061	0.956525	1.06279		-0.373872	0.882036	0.0753871		-0.368008	0.910689	0.0849097		-0.446531	0.821002	0.194059		-0.185327
O00628	PEX7	2	1	1	0.953912	0.993446	1.01484	0.541962	0.489017	0.68235	1.05639	1	0.908733	0.991669	0.858458	0.591969	0.481418	0.753224	0.934963	1	0.777413	0.929953	0.733357	0.504927	0.483983	0.679818	0.876242	1	1.08371	1.1212	0.960605	0.725281	0.723291	0.859636	0.788701		-0.905618	0.692431	0.471326		-0.796968	0.690394	0.508421		-0.125635	0.644923	0.375418		-0.694034
O00629	KPNA4	18	17	1	0.979304	1.00762	0.865611	0.605665	0.506213	0.443178	0.132329	1	0.934202	0.92464	0.806341	0.592294	0.454946	0.282588	0.0727043	1	0.988968	0.98651	0.910771	0.62745	0.517741	0.421875	0.146142	1	1.00748	0.994326	0.90904	0.658885	0.45561	0.23341	0.0835829	14.2796	-0.0770908	0	0.955291	13.0723	-0.0921205	0	0.962266	14.5515	-0.0791092	0	0.967481	13.7723	-0.106158
O00635	TRIM38	5	5	1	0.934446	1.06921	0.885238	0.477391	0.216759	0.141481	0.12149	1	1.21631	1.18553	0.83215	0.482238	0.247069	0.122186	0.0850682	1	1.00278	1.0255	0.843738	0.470255	0.176662	0.106764	0.163723	1	1.00408	0.939299	0.90653	0.468059	0.185199	0.0909642	0.0483452	11.7835	-0.156161	0.0829801	0.991966	11.8216	-0.132265	0.00473761	0.946199	11.5208	-0.156949	0.0827309	0.993918	11.7997	-0.162854
O00712-5	NFIB		1									1	1.11848	1.21555	0.965281	0.578664	0.424422	0.406333	0.370017									1	1.00182	1.30644	1.11574	0.796547	0.71043	0.341956	0.175169					12.8828	-0.157962	0.383849	0.92888					16.3529	-0.105267
O00716	E2F3	3	1	1	1.16812	1.01541	0.859796	0.490429	0.302005	0.238944	0.20866	1	0.932542	0.888736	0.721883	0.346269	0.189127	0.13185	0.0529876	1	1.0897	1.0234	0.933537	0.525154	0.28899	0.231328	0.160327	1	0.909503	1.0833	0.795696	0.535488	0.276875	0.175445	0	11.9103	-0.134591	0.177422	0.973464	10.5461	-0.134296	0	0.987272	12.2628	-0.149859	0.15746	0.991023	12.0095	-0.124032
O00743-3	PPP6C	16	16	1	0.986081	1.03385	0.856789	0.493187	0.401625	0.661455	1.15875	1	0.96208	0.986837	0.803766	0.522789	0.518558	0.729694	0.907377	1	0.958665	0.925126	0.788405	0.499912	0.410571	0.681626	1.02722	1	0.97089	0.955475	0.804342	0.626108	0.548918	0.729732	0.841168		-0.827583	0.678755	0.35069		-0.949086	0.669603	0.612107		-0.108848	0.6682	0.391139		-0.801049
O00744	WNT10B	1		1	1.33191	1.31486	0.791197	0.614587	0.396221	0.338055	0.142989									1	1.15743	1.055	0.893238	0.544333	0.264465	0.300627	0.354532									13.356	-0.089323	0	0.837424					12.0871	-0.158635	0.289072	0.959027
O00746	NME4	1		1	0.904928	0.82904	0.629795	0.572151	0.386785	0.442166	0.241443									1	0.933962	1.12829	1.28265	0.629028	0.466781	0.319	0.445705									12.1467	-0.0738531	0	0.944794					12.6109	-0.318058	0.409268	0.872767
O00748	CES2	2	1	1	0.916949	1.03253	0.871726	0.49621	0.450481	0.532973	0.428726	1	0.998274	1.30542	1.51904	0.717899	0.657164	0.5489	0.523448	1	1.09942	1.11216	0.978736	0.60397	0.406584	0.444219	0.35702	1	1.32915	0.627019	0.620851	0.49236	1.40514	0.444047	0.404822	11.7997	-0.217119	0.470399	0.970733		-0.261569	0.575987	0.59654	12.971	-0.172193	0.390774	0.965373		-1.14882
O00750	PIK3C2B	8	6	1	1.08149	1.01411	0.817325	0.433508	0.155227	0.064985	0.0561408	1	1.02943	1.09397	0.878132	0.469578	0.222458	0.174477	0.154511	1	1.01972	1.0208	0.849548	0.403028	0.144754	0.0658293	0.0528141	1	1.07106	1.01195	0.81728	0.444942	0.246258	0.158065	0.151823	11.3026	-0.154891	0	0.993866	11.6898	-0.158612	0.124403	0.991371	11.2749	-0.167967	0.00700912	0.99915	11.4534	-0.138248
O00754	MAN2B1	15	14	1	1.02096	0.988971	0.797242	0.552358	0.520646	0.72338	0.874246	1	1.11999	1.01374	0.880558	0.649963	0.672818	0.922043	1.25024	1	1.03714	1.0717	0.918728	0.561497	0.513879	0.733368	0.951313	1	1.01505	0.922296	0.983008	0.773274	0.79588	0.905454	1.04166		-0.789552	0.667657	0.704039		-0.283623	0.873765	0.161314		-0.837263	0.690014	0.625237		-0.0361652
O00762	UBE2C	13	10	1	1.1508	1.36735	1.18735	0.780862	0.733887	0.90815	0.985155	1	1.14287	1.22611	1.11489	0.822931	0.837351	0.884991	0.880669	1	1.15034	1.3152	1.17542	0.766106	0.745778	0.986004	0.94664	1	1.22644	1.32222	1.15646	0.992715	0.962758	0.7754	0.730913		-0.0785192	0.852281	0.261356		-0.0715732	0.855123	0.470845		-0.0621687	0.856074	0.257421		-0.0766887
O00763	ACACB	17		1	1.02066	0.968227	0.796466	0.411041	0.153564	0.0505082	0.0431995									1	0.984463	0.96261	0.758953	0.413582	0.150671	0.057995	0.0446049									11.104	-0.156612	0	0.997567					10.9427	-0.150324	0	0.996289
O00764	PDXK	15	13	1	0.881329	0.859957	0.77504	0.530245	0.499457	0.783059	1.15537	1	1.08938	1.06324	0.943317	0.673163	0.719373	0.962157	1.31206	1	0.917309	0.855915	0.756625	0.530604	0.503277	0.749241	0.971593	1	0.986817	1.05044	1.00283	0.734815	0.785291	0.955473	1.09167		-0.177758	0.748422	0.142644		-0.212215	0.916689	0.0818194		-0.142153	0.700117	0.38614		-0.117609
O00767	SCD	11	13	1	0.908445	1.04767	0.753694	0.40377	0.1678	0.0593655	0.0263859	1	1.04612	0.972988	0.776348	0.393348	0.141626	0.0391082	0.0145892	1	0.937779	0.962369	0.75081	0.396211	0.163872	0.0790795	0.040851	1	1.0112	0.944325	0.743892	0.389078	0.147577	0.0514743	0.0240048	10.9327	-0.151496	0	0.988527	10.9254	-0.162035	0	0.99555	10.8662	-0.146726	0	0.994818	10.7637	-0.15395
O14494	PPAP2A	1		1	1.07949	1.09023	0.918485	0.626528	0.504404	0.743798	0.966833									1	1.06585	0.915921	0.892732	0.57595	0.427236	0.664996	0.677985										-0.731299	0.710391	0.603349						-1.40631	0.586542	0.853507
O14495	PPAP2B	1		1	0.953784	1.06425	0.884235	0.466692	0.666907	0.819448	0.823883									1	0.970913	1.13718	0.969307	0.64554	0.641211	0.834038	0.834354										-0.763397	0.694233	0.649736						-0.691487	0.738786	0.736638
O14497	ARID1A	49	38	1	0.981297	0.991249	0.811484	0.527336	0.402763	0.313793	0.233398	1	1.05424	1.00226	0.827348	0.529042	0.357553	0.185759	0.073144	1	1.00612	1.01604	0.857174	0.54072	0.39014	0.314761	0.23737	1	1.01857	0.963423	0.856776	0.541035	0.346398	0.17447	0.0773921	12.7139	-0.0913628	0.118354	0.997618	12.3501	-0.110092	0	0.991428	12.7286	-0.104156	0.185251	0.997733	12.4688	-0.113631
O14508	SOCS2	1		1	0.862008	1.04475	0.880264	0.675531	0.43167	0.0993583	0.0822496									1	0.832329	0.907521	0.846246	0.607368	0.410774	0.159359	0.0789707									13.5021	-0.124629	0	0.96213					12.968	-0.109399	0	0.944265
O14512	SOCS7	2		1	0.90643	0.858309	0.753797	0.522858	0.24744	0.157061	0.0661976									1	0.826161	0.909912	0.781479	0.500318	0.269014	0.141038	0.0963172									11.5403	-0.115053	0	0.965574					11.671	-0.116142	0	0.958014
O14519	CDK2AP1	1	3	1	0.993057	1.16481	0.741393	0.52625	0.450092	0.577273	0.666418	1	1.03046	0.940501	0.900174	0.586012	0.384299	0.577695	1.01515	1	1.08966	1.26193	1.04229	0.518123	0.500863	0.624374	1.04143	1	0.984256	0.975257	1.0016	0.622471	0.587536	0.792321	0.695401		-1.04679	0.555008	0.889173		-1.02373	0.640789	0.50261		-0.225772	0.671086	0.543228		-0.810925
O14521	SDHD	1	1	1	1.22019	1.11446	0.707204	0.690033	0.591447	0.502356	0.18786	1	0.76683	0.923351	0.835735	0.743249	0.652318	0.382927	0.183893	1	0.959121	0.940762	0.98805	0.566479	0.623153	0.528359	0.277038	1	0.928648	0.96801	0.88278	0.77749	0.450995	0.33404	0.175917	15.2809	-0.0632668	0	0.847699	15.6896	-0.0767394	0	0.826303	16.2556	-0.0604838	0	0.894081	14.7085	-0.0914693
O14523-2	C2CD2L	5	3	1	1.03145	1.11207	0.883624	0.496895	0.307888	0.233446	0.21654	1	1.49132	1.54455	1.16678	0.616614	0.471386	0.700514	0.205854	1	0.963046	1.04205	0.863355	0.502635	0.287426	0.217423	0.203376	1	1.22431	1.07168	1.07796	0.818583	0.553936	0.450385	0.237898	11.9905	-0.142707	0.191954	0.986547	12.5825	-0.414826	0.459171	0.578224	11.9615	-0.135823	0.159933	0.996299	16.1245	-0.0872765
O14524	TMEM194A		3									1	0.804962	0.932788	0.700243	0.456593	0.306827	0.148676	0.0925607									1	1.04453	0.985778	0.842613	0.477924	0.292551	0.188388	0.0966309					11.1307	-0.109674	0	0.948671					11.9914	-0.115788
O14526	FCHO1	3	1	1	0.975576	0.97854	0.898607	0.546212	0.469055	0.39493	0.190932	1	0.853474	1.1543	1.10477	0.693986	0.581824	0.487239	0.240898	1	0.976194	0.963916	0.825961	0.495957	0.355385	0.314961	0.218619	1	1.09897	1.20499	0.861812	0.717476	0.693233	0.456717	0.0892762	13.8611	-0.0784864	0	0.974068	16.202	-0.0747296	0.00602825	0.878809	12.183	-0.108453	0.17897	0.995118	15.9683	-0.0839825
O14530	TXNDC9	12	5	1	0.944082	1.01785	0.851504	0.611892	0.558442	0.645501	0.753645	1	0.972165	1.03298	0.887793	0.665462	0.577934	0.603804	0.545476	1	0.975018	0.98877	0.828362	0.592689	0.527533	0.615179	0.614331	1	0.93738	1.02988	0.857531	0.681411	0.609999	0.569651	0.482575		-0.916942	0.64237	0.896741		-0.0917208	0.558989	0.988167		-0.242943	0.586756	0.979451		-0.060578
O14531	DPYSL4	3	2	1	0.980762	0.992809	0.776917	0.529896	0.449577	0.435021	0.285266	1	0.952848	0.956197	0.816266	0.50456	0.456404	0.342638	0.242058	1	1.07137	1.08614	0.910658	0.5944	0.448074	0.45039	0.385479	1	1.00332	0.997011	0.953697	0.579367	0.433724	0.287029	0.242296	13.1734	-0.084029	0.233514	0.985755	13.085	-0.0797167	0.0538251	0.9852	13.5547	-0.119302	0.396299	0.977975	13.2445	-0.113422
O14544	SOCS6	6	9	1	1.00425	1.00789	0.858916	0.506917	0.306764	0.228698	0.250088	1	0.966326	0.986446	0.848342	0.53117	0.272966	0.179868	0.152599	1	0.944071	0.936197	0.805169	0.554655	0.307244	0.283797	0.225135	1	0.982955	1.05626	0.831456	0.505274	0.283686	0.181046	0.159405	11.9745	-0.134447	0.197662	0.998553	12.1477	-0.121404	0.0585424	0.997988	12.3732	-0.0977843	0.0933997	0.988346	11.9702	-0.122911
O14545	TRAFD1	4	4	1	0.937497	1.17454	0.97917	0.570469	0.478065	0.495972	0.601778	1	1.03926	1.02372	0.870823	0.581758	0.531607	0.526389	0.598629	1	0.954924	0.958185	0.797465	0.547136	0.427054	0.421229	0.530131	1	1.03322	1.07959	0.855225	0.622073	0.554789	0.486921	0.554976		-0.217442	0.525735	0.915725		-0.168942	0.552652	0.985532	12.9812	-0.13583	0.455083	0.970246		-0.105111
O14548	COX7A2L	7	5	1	1.01591	1.00923	0.919535	0.533697	0.372776	0.284526	0.220548	1	1.11576	1.00918	0.809821	0.546772	0.402259	0.233913	0.156941	1	0.98691	0.974264	0.831268	0.5524	0.363218	0.268291	0.214061	1	1.11899	1.09594	0.978893	0.709851	0.45171	0.20927	0.218827	12.5641	-0.126969	0.2099	0.996969	12.6944	-0.0939224	0	0.982664	12.6808	-0.0963493	0.0788639	0.999538	14.048	-0.116501
O14561	NDUFAB1	4	5	1	1.45028	1.61395	1.13921	1.11907	0.815267	1.04019	1.50119	1	0.939918	1.16574	1.01865	0.981897	0.859078	0.811104	0.960974	1	1.26765	2.14818	1.73477	0.789359	0.978388	1.10778	1.43606	1	1.01023	1.35016	0.894389	0.972832	0.75719	0.894926	0.962274						-0.328659	0.877052	0.462046		0.549653	1.43606	-0.391947		-0.337493
O14562	UBFD1	26	25	1	0.965247	1.00955	0.866896	0.617744	0.61128	0.831388	0.908818	1	1.03557	0.989388	0.899488	0.644522	0.701756	0.897674	0.742689	1	0.979485	0.997069	0.86645	0.643082	0.60008	0.811425	0.796531	1	1.02046	1.0447	1.00632	0.777162	0.794589	0.828617	0.627613		-0.638871	0.742307	0.604845		-0.651333	0.74666	0.763957		-1.0472	0.712779	0.794945		-0.130406
O14578-3	CIT	1		1	0.99736	1.21175	0.964777	0.482024	0.113204	0.049097	0.0504934									1	0.827757	1.03894	0.780555	0.417281	0.140241	0.042901	0.068259									11.9098	-0.237063	0.0352662	0.973204					11.0588	-0.15565	0	0.97102
O14578-4	CIT	27	18	1	1.00367	0.965682	0.811685	0.457674	0.166732	0.0740648	0.0731514	1	0.981084	0.990592	0.828631	0.50002	0.224975	0.16742	0.175155	1	1.01286	1.0319	0.857636	0.494049	0.175404	0.0889071	0.0743857	1	0.981069	1.016	0.853089	0.506392	0.231335	0.180189	0.160016	11.3958	-0.146444	0	0.996993	11.7241	-0.134934	0.0966309	0.996306	11.773	-0.149151	0	0.997405	11.8626	-0.138692
O14579	COPE		13									1	1.02925	1.01869	0.862067	0.593355	0.417352	0.133211	0.0425404									1	1.04558	1.0073	0.913423	0.744141	0.329641	0.110947	0.0633321					12.9368	-0.117467	0	0.982426					13.5723	-0.151606
O14593	RFXANK	4	1	1	0.983797	1.05897	0.909269	0.527032	0.329909	0.217188	0.173421	1	0.877369	0.937033	0.765182	0.598189	0.303239	0.197491	0.154861	1	1.07078	1.06317	0.949803	0.557417	0.358543	0.247059	0.137977	1	1.20844	1.53511	1.18226	0.690477	0.406261	0.188035	0.220427	12.3929	-0.130556	0.136791	0.995108	12.292	-0.0996048	0	0.968457	12.8476	-0.122125	0.104429	0.986867	13.5345	-0.159375
O14602	EIF1AY	2		1	0.985878	0.85816	0.758814	0.545654	0.54778	0.618528	0.632593									1	1.06026	1.04377	0.974347	0.680314	0.617428	0.658302	0.511545										-0.0802432	0.5607	0.928133						-0.114684	0.586557	0.952689
O14613	CDC42EP2	1	1	1	1.16536	1.29413	1.03541	0.538694	0.524139	0.401148	0.524766	1	1.40593	1.23546	0.953547	0.703653	0.585037	0.382042	0.578299	1	0.863319	0.77772	0.705785	0.450596	0.315849	0.289568	0.196106	1	0.879461	1.00572	1.17154	0.536115	0.34347	0.306954	0.22396	12.4592	-0.422471	0.483308	0.8529	18.8217	-0.102449	0.482448	0.720808	10.8157	-0.0882967	0	0.940849	12.1334	-0.352921
O14617-5	AP3D1	62	40	1	0.979104	0.909027	0.654484	0.25235	0.0711884	0.0458995	0.0556674	1	0.937616	0.900428	0.611394	0.270867	0.103983	0.0802254	0.0813671	1	1.00468	0.96029	0.659061	0.253519	0.0813138	0.0556726	0.0573893	1	0.955428	0.894611	0.558817	0.251338	0.118087	0.0927322	0.0749454	9.84618	-0.175454	0	0.994243	9.63509	-0.151334	0	0.992115	9.89909	-0.180172	0.0110108	0.998816	9.27719	-0.148563
O14618	CCS	4	4	1	0.952043	0.891009	0.82435	0.583995	0.631276	0.886364	1.26204	1	1.05644	1.00006	0.947169	0.671744	0.743211	1.08114	1.25863	1	1.02214	1.03781	0.909161	0.638227	0.677435	0.935932	1.18956	1	1.00217	1.0579	0.935402	0.783085	0.833557	0.972496	1.03598						-0.199442	0.938682	0.0428495		-0.343819	0.860288	0.177339		-0.23755
O14628	ZNF195	1	2	1	1.14513	1.01771	0.899388	0.403611	0.228098	0.183854	0.216367	1	1.07248	1.04156	0.846931	0.412959	0.299845	0.28361	0.261944	1	0.981256	0.862526	0.732848	0.374894	0.221548	0.167323	0.163853	1	1.12426	1.13965	0.769736	0.52879	0.33356	0.251995	0.229204	11.2912	-0.198365	0.18943	0.981581	11.1531	-0.177536	0.263927	0.992508	10.7176	-0.112511	0.00181657	0.984919	12.0454	-0.110268
O14639	ABLIM1	13	17	1	0.981455	0.98362	0.77584	0.586459	0.483511	0.649912	0.75638	1	1.04404	1.05481	0.877345	0.629831	0.593677	0.661796	0.764284	1	0.979839	0.971663	0.796786	0.571654	0.491063	0.666089	0.751766	1	0.978381	1.04563	0.962627	0.722277	0.682621	0.663299	0.694322		-0.909275	0.619066	0.854132		-0.859807	0.662397	0.917544		-0.998582	0.620143	0.850912		-0.107607
O14640	DVL1	9	6	1	1.06267	1.00428	0.795325	0.421601	0.234427	0.155769	0.138226	1	1.04827	0.944749	0.788491	0.461257	0.281335	0.248441	0.126252	1	0.9901	0.968105	0.781402	0.412194	0.227971	0.151335	0.115038	1	0.971226	0.966804	0.783964	0.443906	0.245781	0.217825	0.150918	11.2441	-0.139224	0.0840895	0.996399	11.7066	-0.105906	0.0152587	0.99286	11.1747	-0.13303	0.0485604	0.999467	11.3568	-0.126408
O14641	DVL2	14	16	1	0.990679	0.951645	0.768616	0.463597	0.220622	0.121857	0.103446	1	1.00097	0.991683	0.773004	0.444373	0.211562	0.118374	0.0941669	1	1.00456	0.954194	0.795974	0.452209	0.227098	0.132394	0.10586	1	1.00978	0.951917	0.850257	0.407002	0.212363	0.114978	0.0955778	11.3519	-0.124178	0	0.997281	11.2908	-0.129032	0	0.999306	11.4557	-0.125038	0	0.998559	11.3415	-0.155793
O14646	CHD1	5		1	1.08642	0.941486	0.667143	0.227351	0.110859	0.0977898	0.118584									1	0.931547	0.955492	0.63021	0.204338	0.102762	0.0997709	0.123423									9.78905	-0.215107	0.0890154	0.991743					9.5751	-0.232124	0.0952121	0.99404
O14647	CHD2	3		1	0.960845	0.967781	0.802151	0.478488	0.387191	0.34142	0.261755									1	0.961307	0.891589	0.712865	0.47859	0.376797	0.345446	0.272867									12.0391	-0.11028	0.242793	0.993391					12.0311	-0.0791856	0.0205015	0.99368
O14653-2	GOSR2	5	6	1	0.995965	0.894951	0.708912	0.483522	0.3577	0.512225	0.363388	1	0.950394	0.924048	0.806644	0.599657	0.512518	0.565681	0.636873	1	1.23676	1.18257	1.07071	0.644289	0.44107	0.501418	0.678816	1	0.999577	1.06107	0.855403	0.61146	0.531776	0.585936	0.488065	12.241	-0.0935301	0.332321	0.958087		-0.158956	0.573673	0.937707		-1.06564	0.540435	0.819334		-0.110095
O14656	TOR1A	14	5	1	1.02155	0.988353	0.845789	0.497063	0.250949	0.152763	0.131397	1	1.02276	0.98727	0.830512	0.484886	0.216364	0.0765455	0.042601	1	0.97798	0.982779	0.83149	0.475181	0.242667	0.156734	0.132753	1	1.01061	0.947971	0.789488	0.457751	0.207155	0.103684	0.0343828	11.8853	-0.129685	0.0496827	0.999145	11.6845	-0.143412	0	0.997311	11.6949	-0.131452	0.0586583	0.999144	11.3707	-0.13738
O14657	TOR1B	10	9	1	1.02174	0.997415	0.856855	0.549826	0.323032	0.170013	0.0961343	1	1.05362	1.02033	0.850904	0.533469	0.337096	0.160617	0.0692703	1	1.00159	1.01184	0.851827	0.531576	0.314168	0.180909	0.0827957	1	1.04244	1.04511	0.9116	0.559376	0.280423	0.154681	0.0920176	12.4609	-0.114839	0	0.998454	12.3732	-0.117007	0	0.99323	12.3349	-0.115665	0	0.99822	12.5178	-0.131076
O14662	STX16	5	5	1	1.06107	1.00563	0.894819	0.581148	0.451396	0.382996	0.277183	1	0.960708	1.00003	0.924578	0.605774	0.509716	0.497808	0.460496	1	1.03423	1.1319	0.878734	0.579005	0.469578	0.356802	0.279076	1	1.0636	1.11315	0.950518	0.644848	0.583269	0.526599	0.451459	13.5991	-0.0941263	0.234748	0.989356	15.3732	-0.122115	0.472304	0.995111	13.5772	-0.0940807	0.22654	0.970291	19.1813	-0.09825
O14668	PRRG1	1	1	1	1.34819	1.00777	1.25575	0.719342	0.533812	0.623826	1.10086	1	1.04421	0.948292	0.847373	0.422196	0.314821	0.345185	0.304075	1	1.03721	1.20207	0.976456	0.538598	0.455457	0.836996	0.753229	1	0.997763	0.832487	0.767844	0.524794	0.337255	0.33363	0.347082		-0.121783	0.740083	0.382992	11.1058	-0.186133	0.31213	0.99267		-1.07474	0.64607	0.699699	12.4683	-0.0740671
O14672	ADAM10	30	28	1	0.984295	0.988379	0.849774	0.567119	0.519075	0.722483	0.99897	1	0.877657	0.978717	0.857065	0.609628	0.610113	0.77615	0.903706	1	0.994262	0.987427	0.849148	0.578399	0.523882	0.74355	0.929678	1	0.97013	1.04105	0.896562	0.756589	0.656451	0.791787	0.809772		-1.34058	0.701912	0.504871		-0.754024	0.724899	0.519509		-0.784214	0.693877	0.606386		-0.181629
O14678	ABCD4	1		1	0.933286	1.00713	0.841343	0.442463	0.323421	0.307593	0.265929									1	1.0924	1.13411	0.892623	0.515852	0.300229	0.294662	0.195803									11.4098	-0.156922	0.271996	0.993525					12.1447	-0.139991	0.202599	0.972162
O14681	EI24	2	3	1	0.924256	0.901644	0.634123	0.458986	0.230517	0.18541	0.227463	1	0.845484	0.883453	0.712399	0.465298	0.326919	0.149509	0.0881488	1	1.19172	1.05959	1.02621	0.540057	0.334279	0.217966	0.315127	1	1.05583	1.18635	0.828821	0.605316	0.282599	0.186218	0.152034	10.6075	-0.10054	0.00103574	0.981617	11.1985	-0.10685	0	0.954705	12.2211	-0.250648	0.280784	0.956562	12.5968	-0.113949
O14682	ENC1	1	1	1	1.03555	0.965214	0.927857	0.480929	0.22774	0.166912	0.0924401	1	1.24008	1.05887	0.93617	0.418994	0.0866155	0	0	1	0.81868	0.920761	0.70972	0.423819	0.170723	0.115741	0.104731	1	1.02789	1.1037	0.778014	0.377457	0.0788806	0.0304262	0	11.929	-0.163688	0.0898927	0.996791	11.5937	-0.231631	0	0.967482	10.7634	-0.127307	0	0.959525	10.8207	-0.180405
O14683	TP53I11	3	1	1	0.926295	0.945299	0.808708	0.493407	0.304426	0.231773	0.147237	1	1.02207	1.31001	1.01978	0.606094	0.436611	0.24965	0.151073	1	1.04871	1.03366	0.882248	0.543759	0.321735	0.264644	0.185413	1	0.931942	0.880085	0.798915	0.471409	0.299668	0.235751	0.133285	12.0228	-0.102898	0.00893062	0.99116	13.5935	-0.114314	0.0885756	0.911394	12.4579	-0.120913	0.146003	0.995201	11.7934	-0.101653
O14686-3	KMT2D	11	9	1	1.00606	1.02499	0.872487	0.536358	0.419262	0.323429	0.197293	1	1.06264	1.05593	0.921589	0.595941	0.455943	0.362736	0.238373	1	0.998716	1.03345	0.873306	0.558901	0.428611	0.305537	0.179855	1	1.00523	1.06929	0.928249	0.639749	0.461796	0.326101	0.260065	13.0418	-0.0951387	0.112978	0.991258	13.779	-0.0931836	0.172357	0.983784	13.3369	-0.0882722	0.0078949	0.99229	14.0116	-0.0940738
O14713	ITGB1BP1	2	1	1	0.830497	0.860607	0.708577	0.456252	0.234244	0.14669	0.208041	1	0.938302	0.834256	0.709993	0.395606	0.22033	0.0947503	0.103313	1	0.960433	0.767171	0.586472	0.389337	0.197152	0.157811	0.173497	1	1.05789	1.07578	0.803813	0.479215	0.223964	0.179846	0.161793	10.8975	-0.103886	0	0.942219	10.5748	-0.121878	0	0.975511	9.31493	-0.110467	0	0.98152	11.5435	-0.134936
O14715	RGPD8	5		1	1.055	1.00694	0.802992	0.434425	0.176121	0.0909136	0.110024									1	1.02403	0.942876	0.725248	0.386107	0.167232	0.0886078	0.0842077									11.264	-0.146139	0.0268477	0.995501					10.7096	-0.138357	0	0.997076
O14717	TRDMT1	5	2	1	1.02014	1.10306	0.79168	0.452441	0.251001	0.222605	0.125936	1	0.961674	1.03379	0.997794	0.491473	0.276029	0.236752	0.160955	1	0.999644	1.08337	0.877082	0.428095	0.252137	0.192991	0.137061	1	1.14891	1.04496	0.802109	0.490112	0.293597	0.162644	0.18483	11.471	-0.130752	0.0975947	0.986776	12.0153	-0.210399	0.201041	0.993638	11.5133	-0.161375	0.137986	0.992878	11.7827	-0.120572
O14727	APAF1	10	10	1	1.0457	0.981739	0.827458	0.415165	0.198303	0.128002	0.0888646	1	1.05499	1.09487	0.854773	0.426848	0.205025	0.152571	0.108209	1	1.03012	1.07065	0.865633	0.43656	0.200897	0.136735	0.112569	1	0.98305	0.956227	0.79502	0.429095	0.22314	0.144347	0.105199	11.3023	-0.149065	0.0450923	0.998116	11.4197	-0.159547	0.08717	0.990316	11.4927	-0.161394	0.0819589	0.995144	11.3179	-0.130498
O14730	RIOK3	7	11	1	1.01208	1.06918	0.866318	0.477415	0.276663	0.221564	0.256025	1	1.01004	0.998696	0.816577	0.476143	0.251227	0.182752	0.120294	1	0.985492	0.991383	0.824482	0.448617	0.255136	0.204553	0.168558	1	0.964732	0.950069	0.773968	0.490751	0.238258	0.170441	0.128972	11.6841	-0.153911	0.212146	0.993102	11.7149	-0.123728	0.0432749	0.999533	11.4845	-0.139169	0.132516	0.999654	11.5902	-0.113641
O14732	IMPA2	5	3	1	1.04434	0.951363	0.841692	0.594455	0.576469	0.92189	1.42678	1	0.996412	0.965662	0.812505	0.572603	0.565434	0.876965	1.01643	1	1.01818	0.997518	0.904192	0.637852	0.600232	0.923164	1.28761	1	1.00447	1.07113	0.886242	0.764185	0.740698	0.749427	0.950695						-0.107092	0.765504	0.370093		-0.326028	0.862214	0.104064		-0.502873
O14733-2	MAP2K7	9		1	0.969032	0.962136	0.714641	0.3486	0.0906472	0.0312967	0.0338757									1	0.945795	0.93627	0.684099	0.333004	0.108526	0.0487814	0.0343058									10.4265	-0.167626	0	0.995155					10.2412	-0.159989	0	0.993674
O14733-4	MAP2K7		10									1	0.982744	0.946213	0.731236	0.365835	0.16572	0.0946273	0.089887									1	0.994941	0.912871	0.688095	0.350818	0.170439	0.0998742	0.0651332					10.6696	-0.140534	0.00267529	0.997903					10.37	-0.137478
O14734	ACOT8	4	4	1	0.933703	0.959725	0.808891	0.440113	0.272484	0.172523	0.104931	1	0.971822	1.02204	0.830057	0.46141	0.238582	0.0843355	0.0997697	1	1.00503	0.973075	0.742476	0.452471	0.228988	0.153702	0.123145	1	0.882816	0.891828	0.714416	0.446829	0.194908	0.106907	0.0745105	11.5809	-0.119444	0.0148793	0.993845	11.6429	-0.134396	0	0.996807	11.2451	-0.117189	0	0.998963	10.8764	-0.126151
O14735	CDIPT	6	5	1	1.05545	1.16455	0.969675	0.537078	0.286666	0.192708	0.177065	1	0.931297	0.961551	0.833452	0.425806	0.181413	0.0712382	0.0403084	1	1.04487	1.06576	0.963155	0.488955	0.333391	0.180407	0.176728	1	1.02297	0.985784	0.846999	0.448172	0.199923	0.0682119	0.0675469	12.3117	-0.171728	0.168497	0.974768	11.3643	-0.153489	0	0.994738	12.1447	-0.161325	0.170789	0.988542	11.5491	-0.14857
O14737	PDCD5	13	15	1	0.981866	0.964483	0.896066	0.537194	0.638159	0.802711	1.66465	1	1.02162	0.982837	0.879811	0.668237	0.674607	0.926345	1.46799	1	2.18294	1.19401	1.73228	1.09407	1.26165	1.69696	2.73221	1	1.00537	1.02133	0.941419	0.800066	0.783375	1.01219	1.25818						-0.194624	0.923398	0.0267799		1.43303	1.5	-0.271059		-0.140907
O14744	PRMT5	45	48	1	1.01297	1.01297	0.854668	0.618371	0.592451	0.830066	1.24327	1	0.945176	0.972734	0.873457	0.641443	0.643774	0.780196	0.994383	1	0.986501	0.982625	0.841114	0.617769	0.58283	0.803929	1.09345	1	0.97714	1.05093	0.92469	0.763045	0.686654	0.842478	0.872869		-0.42316	0.82104	0.185677		-0.591381	0.764949	0.454196		-0.539947	0.774494	0.326416		-0.545494
O14745	SLC9A3R1	27	30	1	0.997366	1.02358	0.841698	0.625903	0.616156	0.937747	1.39868	1	1.08113	1.06541	0.953423	0.70284	0.816978	1.14974	1.50328	1	0.955874	0.97003	0.841317	0.633242	0.624197	0.91644	1.23998	1	1.03934	1.03539	1.00281	0.910728	0.940752	1.1486	1.32645						0.987827	1.5	0.663935		-0.369952	0.851035	0.0984936		0.49167
O14757	CHEK1	26	16	1	0.981991	0.967823	0.827799	0.568042	0.356268	0.108966	0.0458973	1	0.990572	0.998125	0.867822	0.582457	0.357484	0.0920392	0.0773153	1	0.999009	0.962142	0.833401	0.586497	0.365869	0.125363	0.0538618	1	1.00327	0.994287	0.911619	0.67376	0.349809	0.117248	0.0726105	12.4442	-0.120887	0	0.985935	12.6727	-0.124464	0	0.990622	12.6177	-0.11825	0	0.986798	13.2895	-0.134372
O14763	TNFRSF10B	7	5	1	0.977182	0.971371	0.818663	0.590622	0.560465	0.821494	1.11885	1	0.837208	0.998439	0.842475	0.596283	0.558814	0.746357	0.830415	1	0.997294	1.01697	0.858329	0.62131	0.574061	0.817559	1.09328	1	1.04325	1.10731	0.902965	0.69047	0.688389	0.705	0.697979		-0.107032	0.779502	0.272657		-0.791487	0.682967	0.595808		-0.553565	0.776552	0.348215		-0.759472
O14771	ZNF213	1		1	1.01459	1.10417	1.09727	0.536409	0.491257	0.412429	0.527115									1	0.943296	0.989983	0.759036	0.484911	0.420882	0.402326	0.343745									12.2553	-0.581671	0.476932	0.957868					11.9147	-0.118712	0.349197	0.991961
O14772	FPGT	10	7	1	1.01006	0.913217	0.755183	0.424216	0.182455	0.0812344	0.0710331	1	1.004	1.00701	0.876124	0.512385	0.275728	0.219465	0.114379	1	1.05031	1.00408	0.79663	0.435525	0.198671	0.0974581	0.0735176	1	1.00048	1.0047	0.810792	0.481157	0.256163	0.145478	0.0792033	11.0008	-0.137327	0	0.993216	12.1672	-0.126127	0.0693556	0.99795	11.3162	-0.138614	0	0.997488	11.736	-0.123786
O14773	TPP1	10	6	1	0.977114	1.03378	0.868632	0.548053	0.419667	0.430208	0.351363	1	0.948103	0.996381	0.861972	0.556735	0.315513	0.360863	0.262035	1	0.974579	1.06638	0.89971	0.549137	0.459447	0.427239	0.317192	1	0.924502	1.07075	0.807557	0.460627	0.312911	0.240877	0.127464	12.799	-0.121794	0.366299	0.993176	12.4321	-0.121363	0.250551	0.987549	13.1023	-0.116563	0.351282	0.982209	11.7999	-0.117281
O14775	GNB5		2									1	1.03128	1.11763	0.987321	0.575417	0.526149	0.54817	0.248513									1	0.979525	0.973178	0.930834	0.636159	0.504356	0.372983	0.196995					14.3644	-0.100319	0.35577	0.907738					14.5387	-0.0799529
O14776	TCERG1	37	34	1	0.985597	0.964957	0.820332	0.5651	0.434778	0.281956	0.0551162	1	0.985761	0.948206	0.84164	0.598424	0.462048	0.190062	0.0630887	1	1.01039	0.990159	0.863246	0.584383	0.461952	0.266813	0.0710442	1	0.996515	1.04491	0.919489	0.662113	0.519689	0.182158	0.0818428	12.9065	-0.0961416	0	0.97462	13.1253	-0.103819	0	0.974508	13.292	-0.0974931	0	0.980007	13.9814	-0.109646
O14777	NDC80	25	23	1	1.00391	1.04293	0.867411	0.508822	0.233002	0.0827937	0.0305894	1	1.0139	0.995057	0.852855	0.498315	0.23045	0.116207	0.0924892	1	0.952671	0.953753	0.769767	0.454887	0.213892	0.0958152	0.0474196	1	0.969541	0.972792	0.81163	0.462896	0.225523	0.122923	0.0957781	11.977	-0.146769	0	0.996651	11.8975	-0.133054	0.000384816	0.999395	11.277	-0.134246	0	0.993997	11.5641	-0.128806
O14782	KIF3C	2	2	1	0.975661	0.993931	0.854963	0.503788	0.271396	0.0596443	0.036213	1	0.95194	1.02078	0.972651	0.632508	0.36695	0.164519	0.199456	1	0.93788	0.976382	0.821417	0.49902	0.299114	0.0713431	0.0441935	1	1.09207	1.04507	0.851136	0.612924	0.34801	0.179915	0.176557	11.9663	-0.141356	0	0.993987	13.1447	-0.137241	0.130286	0.992284	11.8757	-0.131062	0	0.987702	12.9403	-0.1038
O14786	NRP1	1		1	1.00133	1.02618	0.885155	1.00023	0.479506	0.582345	0.493159									1	0.89843	1.33348	2.25573	0.493442	0.509027	0.399001	0.270569										-1.11085	0.518337	0.952413					11.9802	-0.62418	0.392854	0.424577
O14787	TNPO2	19	16	1	1.04343	1.07153	0.987797	0.684113	0.480908	0.328226	0.155993	1	0.855011	0.900369	0.787443	0.590606	0.435157	0.244411	0.100962	1	1.0884	1.08724	1.00271	0.676365	0.476272	0.32563	0.144418	1	1.03131	1.04964	0.825713	0.618216	0.355949	0.234368	0.112308	14.5297	-0.0936173	0	0.984653	12.8184	-0.0923465	0	0.942324	14.4645	-0.0956828	0	0.974258	12.9446	-0.102283
O14792	HS3ST1	2	2	1	1.0019	1.05024	0.795507	0.452976	0.388842	0.283183	0.252467	1	1.09023	1.18208	0.854646	0.491562	0.320401	0.241354	0.131524	1	0.961854	1.13271	0.872158	0.515322	0.316338	0.214522	0.131691	1	1.01215	1.14022	0.889458	0.500239	0.308675	0.188908	0.124349	11.6797	-0.124173	0.23985	0.991944	12.1184	-0.122979	0.10445	0.961764	12.2963	-0.121716	0.0776663	0.980484	12.192	-0.130411
O14795	UNC13B	13	12	1	1.01192	0.948151	0.759818	0.385856	0.156034	0.0866568	0.107545	1	1.02892	1.05323	0.866025	0.431886	0.272483	0.189738	0.164521	1	1.05532	0.993952	0.822085	0.426502	0.164161	0.0974186	0.0954709	1	0.970274	0.943328	0.811727	0.478194	0.243626	0.1974	0.128649	10.8365	-0.147515	0.0231567	0.996473	11.5181	-0.155414	0.150972	0.995872	11.2791	-0.153591	0.0313883	0.996545	11.6868	-0.120208
O14802	POLR3A	40	27	1	0.98672	0.986168	0.801495	0.41718	0.204826	0.119327	0.109153	1	1.0003	0.991407	0.791687	0.399632	0.189756	0.110222	0.0789494	1	1.01212	0.9772	0.782136	0.416051	0.206419	0.134561	0.118368	1	0.988971	0.976727	0.767977	0.36467	0.184579	0.113007	0.0874636	11.2231	-0.142691	0.0434594	0.999515	11.1136	-0.143815	0.0173491	0.999981	11.1425	-0.138211	0.0487423	0.999389	10.834	-0.149985
O14807	MRAS	1		1	1.09748	1.12454	0.940336	0.661023	0.674495	0.954603	1.15886									1	1.05145	1.14279	0.883127	0.611064	0.616719	0.94141	1.00179										-0.336624	0.862244	0.234961						-0.578738	0.792745	0.42907
O14810	CPLX1	3	4	1	1.08034	1.01282	0.900195	0.591717	0.603005	0.836983	1.23025	1	1.17234	1.21921	0.970063	0.692152	0.80557	1.04662	1.31971	1	0.851704	0.958838	0.881997	0.575944	0.53951	0.757171	0.986646	1	0.97683	1.03608	0.93	0.750976	0.747881	0.863813	0.889955		-0.480054	0.815489	0.218762		-0.0714329	0.966012	-0.00274315		-0.761142	0.714818	0.340364		-0.463761
O14817	TSPAN4	1	1	1	1.03166	0.996581	0.7817	0.614481	0.619674	0.895007	1.03091	1	0.829073	0.930289	0.869811	0.564557	0.546768	0.620723	0.827039	1	1.12222	1.33477	1.07221	0.73123	0.81934	0.983381	1.09515	1	1.00539	1.11958	0.913094	0.616608	0.610545	0.826783	0.776493		-0.567654	0.788355	0.412863		-0.935158	0.639772	0.599971		-0.0369446	0.91184	0.111936		-0.772525
O14818-2	PSMA7	1		1	1.21615	1.71204	1.45423	0.934867	0.948529	1.18753	2.95715									1	0.725291	0.979285	0.74156	0.509176	0.692831	0.804137	1.04629										1.96908	1.5	0.090332
O14818	PSMA7	52	40	1	0.990386	0.973631	0.843195	0.603564	0.572843	0.856856	1.27918	1	1.00377	0.986676	0.861216	0.639757	0.641003	0.887956	1.12826	1	1.00562	0.984791	0.855691	0.641401	0.622423	0.884083	1.19231	1	0.991573	1.01369	0.904999	0.747027	0.733351	0.88451	0.984383		-0.127381	0.830955	0.126627		-0.415851	0.824245	0.241184		-0.100575	0.838559	0.180127		-0.442139
O14828-2	SCAMP3	1		1	0.965345	0.968136	0.765643	0.4594	0.293775	0.506893	0.504249									1	0.80009	1.00117	0.709547	0.567305	0.208365	0.230363	0.485807									10.3659	-0.281302	0.439001	0.939073					11.2957	-0.128465	0.29881	0.828429
O14828	SCAMP3	10	10	1	1.01189	1.01132	0.869479	0.492003	0.337107	0.202727	0.148691	1	1.12416	1.05022	0.926316	0.538405	0.317388	0.147196	0.0562679	1	1.05295	1.00459	0.93273	0.516097	0.335147	0.228554	0.142026	1	1.05735	0.934319	0.934574	0.522907	0.316816	0.151828	0.0728469	12.2008	-0.118773	0.0821625	0.997258	12.5535	-0.129426	0	0.98347	12.4234	-0.131958	0.125458	0.993295	12.5022	-0.126952
O14832	PHYH	5	3	1	0.918683	0.97557	0.863793	0.575777	0.560315	0.804576	0.944605	1	1.08156	1.06749	0.909447	0.639814	0.609337	0.708362	0.892431	1	0.965166	0.906561	0.898106	0.585368	0.522197	0.719442	0.959209	1	1.07378	1.19543	0.959765	0.716479	0.705134	0.713203	0.718083		-0.807358	0.721319	0.471534		-0.973523	0.712486	0.76137		-0.823036	0.696554	0.491381		-0.168123
O14841	OPLAH	13	10	1	1.03899	1.02628	0.863755	0.594074	0.559348	0.518972	0.171547	1	1.06592	1.09289	0.901684	0.593878	0.546762	0.468349	0.189349	1	0.985227	1.00298	0.855201	0.587962	0.514836	0.500014	0.154834	1	1.00255	1.01243	0.911982	0.653349	0.518396	0.297322	0.162806	15.0169	-0.067639	0	0.927321	14.8957	-0.071699	0	0.940973	14.5139	-0.0710388	0	0.936608	14.3046	-0.0884331
O14867	BACH1	10	2	1	0.997563	1.05884	0.938252	0.592275	0.548689	0.672225	0.864848	1	1.10743	0.99174	0.915217	0.756271	0.572715	0.774851	0.710221	1	0.997567	1.02593	0.908927	0.598079	0.563578	0.671297	0.77005	1	1.09438	1.0963	0.977113	0.812876	0.654685	0.636674	0.720002		-0.861791	0.669509	0.779984		-0.0906097	0.691512	0.843362		-0.912148	0.650751	0.898706		-0.782599
O14874	BCKDK		5									1	0.969308	0.891202	0.693122	0.319601	0.146704	0.0951363	0.0580909									1	1.00313	0.912782	0.703358	0.30392	0.156084	0.0909022	0.0936343					10.2524	-0.145056	0	0.99257					10.2671	-0.153179
O14879	IFIT3	2		1	0.860502	1.08749	0.967749	0.512606	0.417868	0.400629	0.360526									1	1.04351	1.11043	1.00192	0.594251	0.426628	0.413797	0.346175									12.1684	-0.19563	0.38599	0.956936					12.863	-0.181466	0.383324	0.977336
O14880	MGST3	4	4	1	0.903686	0.962997	0.839808	0.49251	0.332438	0.33883	0.155453	1	0.877557	1.05327	0.864048	0.475655	0.304903	0.258679	0.144245	1	0.931213	0.91868	0.810352	0.483024	0.340836	0.288232	0.162848	1	1.04242	1.18528	0.903928	0.613935	0.379234	0.248322	0.158054	12.2502	-0.105931	0.122565	0.972561	11.9453	-0.130117	0.13884	0.976243	12.1999	-0.0927397	0	0.984125	13.2816	-0.105887
O14893	GEMIN2	4	7	1	0.929575	1.15237	0.941937	0.620029	0.647105	0.983511	1.13998	1	0.906119	0.981051	0.914783	0.568725	0.509496	0.559281	0.528077	1	0.924181	0.935929	0.828015	0.617219	0.649	0.976695	1.09853	1	1.02357	1.07698	0.816327	0.704973	0.577534	0.570748	0.406993		-0.450547	0.847657	0.192286		-0.17711	0.531923	0.969248					18.2774	-0.0540636
O14896	IRF6	10	10	1	0.980538	1.02555	0.89129	0.595042	0.483305	0.284118	0.156058	1	0.949174	0.925023	0.785303	0.639101	0.483813	0.15221	0.0412723	1	1.00318	1.03992	0.892371	0.627304	0.505816	0.255088	0.157581	1	1.01468	1.03487	0.956039	0.737553	0.412034	0.131261	0.0489071	13.7203	-0.089312	0	0.988155	13.1584	-0.105039	0	0.944622	13.9211	-0.0913246	0	0.986293	13.8861	-0.140519
O14907	TAX1BP3	2	8	1	1.07841	0.895585	0.733286	0.616843	0.539228	0.895397	0.715338	1	1.11456	1.09685	0.913691	0.639556	0.575683	0.790698	0.850963	1	1.08727	1.10269	1.01355	0.722007	0.645158	0.959494	1.03644	1	1.03333	1.17042	1.00059	0.704896	0.72641	0.586583	0.592227		-0.132789	0.696778	0.685299		-0.768028	0.714225	0.740162		-0.135281	0.840694	0.386449		-0.101828
O14908	GIPC1	19	18	1	0.997164	1.05604	0.900553	0.619939	0.460654	0.34433	0.153695	1	1.0343	1.01814	0.895035	0.62236	0.445755	0.246283	0.0704627	1	0.997165	1.03281	0.895658	0.591576	0.447719	0.324393	0.144395	1	0.976628	1.04253	0.894639	0.620327	0.375172	0.161355	0.0726798	13.9676	-0.0868759	0	0.985839	13.5083	-0.103975	0	0.986454	13.6586	-0.0892072	0	0.988317	13.0997	-0.118965
O14920	IKBKB	12	12	1	1.02377	1.04809	0.857513	0.4878	0.241951	0.0644417	0.0531694	1	1.03554	0.997782	0.814712	0.494957	0.28901	0.202903	0.200628	1	0.974542	0.976279	0.82706	0.45319	0.232781	0.0962235	0.0423648	1	1.01854	0.982973	0.836944	0.491353	0.30938	0.203318	0.19318	11.8508	-0.144385	0	0.995304	11.8213	-0.121721	0.121892	0.997869	11.564	-0.139129	0	0.997794	11.9382	-0.122087
O14924	RGS12	1	1	1	1.06786	1.24092	0.990499	0.546208	0.338756	0.191066	0.114343	1	1.17987	1.16327	0.771292	0.355491	0.180915	0.0832604	0.039279	1	0.938159	1.06854	0.781155	0.408572	0.278101	0.143498	0.100443	1	0.981274	1.01237	0.785595	0.424332	0.19342	0.10932	0.0426551	12.6774	-0.141786	0.100438	0.948174	10.8788	-0.157029	0.00792766	0.962591	11.3073	-0.129251	0.039416	0.988812	11.2164	-0.140803
O14925	TIMM23	7	5	1	0.959868	0.973451	0.742308	0.398934	0.187461	0.0992232	0.059131	1	1.02551	0.990383	0.795307	0.406952	0.192562	0.146097	0.0916661	1	1.03767	0.995051	0.814418	0.428539	0.214243	0.106494	0.0893168	1	0.95595	0.97414	0.744909	0.371221	0.18957	0.109086	0.0704244	10.8914	-0.138162	0	0.997847	11.1429	-0.144164	0.0466447	0.999054	11.3757	-0.138881	0.0142524	0.998614	10.8143	-0.13832
O14929	HAT1	18	24	1	0.975324	0.939761	0.786883	0.507895	0.344519	0.296392	0.224995	1	0.855593	0.91164	0.796683	0.510401	0.322833	0.237154	0.149971	1	1.03423	1.02771	0.860894	0.540755	0.355931	0.323381	0.223107	1	0.944428	1.0205	0.770278	0.514163	0.307218	0.255674	0.152524	12.2085	-0.0939615	0.0919075	0.996347	12.0929	-0.0979267	0	0.96671	12.5552	-0.111425	0.193765	0.994627	12.0514	-0.0998837
O14933	UBE2L6	5	1	1	0.966237	1.15658	0.876569	0.645226	0.477913	0.306225	0.127796	1	0.968652	1.17839	0.926271	0.717798	0.486261	0.391798	0.209599	1	0.928584	0.985856	0.840873	0.630416	0.426778	0.267026	0.0960643	1	1.19316	1.1783	1.08203	0.910472	0.509845	0.310783	0.265529	13.9666	-0.0914967	0	0.961193	14.9869	-0.0814702	0	0.95345	13.3631	-0.0967368	0	0.981595	15.0765	-0.154915
O14936	CASK	23	30	1	0.985844	0.971365	0.828796	0.581883	0.588187	0.785623	0.70354	1	1.02351	0.994781	0.909375	0.642805	0.674229	0.75754	0.465753	1	1.00543	1.00062	0.877322	0.640551	0.619402	0.800484	0.636083	1	1.05679	1.082	0.984892	0.771339	0.766385	0.739804	0.381297		-0.86449	0.664808	0.85533		-0.12664	0.626256	0.844641		-0.838643	0.67413	0.896959	20.7638	-0.0482093
O14939	PLD2	13	7	1	1.04626	0.925378	0.754263	0.3984	0.206211	0.126157	0.113464	1	0.967522	0.906553	0.712802	0.367489	0.164813	0.0796498	0.057977	1	1.02021	0.986082	0.77614	0.419961	0.234803	0.15438	0.136147	1	1.0224	0.849512	0.715661	0.357328	0.163222	0.0988342	0.0757655	10.9606	-0.128674	0.0115063	0.994694	10.5418	-0.141787	0	0.993317	11.1816	-0.133107	0.0680283	0.999499	10.4595	-0.135956
O14944	EREG	6	5	1	0.979783	0.874799	0.821594	0.564937	0.589377	0.927026	1.37967	1	0.620809	0.769057	0.763667	0.589913	0.674102	0.777109	0.915224	1	1.00572	0.963545	0.869752	0.658977	0.629749	1.06565	1.47159	1	0.847246	1.01562	0.723456	0.731248	0.602686	1.02211	0.985894		-0.346993	0.856521	0.0552774						-0.136251	0.939144	0.0120095		-1.11304
O14949	UQCRQ	5	6	1	0.971827	0.938947	0.770109	0.383748	0.159675	0.0658714	0.0214326	1	1.03032	0.964505	0.767491	0.409842	0.157802	0.056395	0.0542179	1	1.04619	0.965651	0.830403	0.394399	0.166758	0.0878816	0.0386996	1	1.01415	1.01134	0.748863	0.385102	0.180492	0.0772876	0.0550662	10.8858	-0.154223	0	0.995722	10.9789	-0.149941	0	0.996606	11.2094	-0.156309	0	0.997621	10.864	-0.145232
O14950	MYL12B	55	54	1	0.96906	0.879974	0.728122	0.517905	0.456822	0.629978	0.386869	1	1.00037	0.978444	0.869663	0.634871	0.578953	0.630262	0.512959	1	1.13032	1.03688	0.941255	0.639352	0.536891	0.674853	0.55974	1	1.01372	1.07163	0.897417	0.67006	0.636578	0.665428	0.43883	15.9128	-0.075253	0.375435	0.906948		-0.0977107	0.558581	0.977142		-0.14583	0.590924	0.924269		-0.0574264
O14957	UQCR11		1									1	0.99278	1.40122	1.17591	0.675327	0.646038	0.567467	0.266536									1	1.23907	1.21503	0.959309	0.822249	0.574179	0.378659	0.275291					17.1834	-0.0680449	0	0.738104					15.9825	-0.0854312
O14964	HGS	35	37	1	0.971965	0.956521	0.842864	0.617539	0.627111	0.876982	0.782463	1	0.848194	0.846077	0.783855	0.642388	0.713568	0.75339	0.438152	1	0.986462	0.996725	0.856939	0.64809	0.648687	0.885944	0.66575	1	0.957792	0.970905	0.829054	0.750809	0.69537	0.822862	0.379752		-0.979623	0.726024	0.677859		-0.0485722	0.0248873	0.660183		-0.754398	0.712118	0.771036		-0.0364679
O14965	AURKA	9	7	1	1.10093	1.05012	0.857422	0.5178	0.303526	0.206207	0.209498	1	1.07193	1.04153	0.936994	0.517339	0.323975	0.275621	0.226455	1	0.977266	1.02942	0.894371	0.563289	0.524047	0.669507	0.823398	1	1.03021	1.02599	0.94494	0.671026	0.627001	0.672455	0.655548	12.0982	-0.128271	0.14707	0.986958	12.2084	-0.156439	0.232975	0.992047		-0.928817	0.64506	0.804483		-0.151553
O14966	RAB7L1	6	4	1	1.00141	0.915711	0.836988	0.406791	0.215078	0.146822	0.139009	1	0.881224	1.02554	0.804939	0.420692	0.207035	0.111722	0.121338	1	0.99429	1.02558	0.850052	0.409269	0.2141	0.130747	0.115698	1	0.885017	0.971449	0.726753	0.452806	0.226195	0.154684	0.0905137	11.2399	-0.157233	0.10287	0.993725	11.242	-0.146018	0.0552897	0.985548	11.3239	-0.160525	0.0857592	0.999177	11.1458	-0.119364
O14967	CLGN	10	4	1	0.944188	1.08441	0.918074	0.572402	0.47972	0.439712	0.306251	1	0.933485	1.1827	1.01013	0.651	0.68127	0.524356	0.265603	1	1.00875	0.98836	0.866597	0.632609	0.434989	0.383345	0.27941	1	0.978759	1.04209	0.896494	1.10423	0.5827	0.376356	0.250516	13.623	-0.105833	0.336914	0.969043	16.9036	-0.0640347	0	0.874535	14.045	-0.0812743	0.140283	0.99748	15.3879	-0.272555
O14972	DSCR3	7	5	1	0.93125	0.99605	0.841802	0.544691	0.335274	0.255439	0.175693	1	1.04517	0.973939	0.93202	0.599325	0.367694	0.263426	0.207943	1	0.960385	1.0329	0.89457	0.532656	0.352965	0.265762	0.172652	1	0.932678	0.949983	0.801428	0.536881	0.347403	0.157999	0.098267	12.5264	-0.103548	0.066152	0.993904	13.0507	-0.118664	0.158314	0.99665	12.5688	-0.116528	0.132489	0.99427	12.1991	-0.108598
O14974	PPP1R12A	26	32	1	0.978528	0.996783	0.845707	0.552384	0.284383	0.135725	0.103815	1	0.99705	0.955072	0.838881	0.560394	0.257431	0.110194	0.0598518	1	1.0168	1.03698	0.896117	0.581142	0.30664	0.154809	0.113229	1	0.987405	1.02656	0.905674	0.581415	0.267887	0.125035	0.0804701	12.2883	-0.121023	0	0.998015	12.1988	-0.131351	0	0.994398	12.6955	-0.120945	0.000588341	0.998088	12.5689	-0.135181
O14975	SLC27A2	12	15	1	1.0215	1.00072	0.804495	0.441978	0.174761	0.0675987	0.0480072	1	0.936594	0.955279	0.708936	0.405772	0.168398	0.0780266	0.0467636	1	0.956	0.919874	0.701456	0.413007	0.165757	0.0693037	0.0564506	1	0.985395	0.932272	0.744669	0.398375	0.165397	0.0818756	0.0455006	11.3128	-0.149309	0	0.998003	10.6971	-0.140348	0	0.992591	10.6476	-0.138223	0	0.990414	10.8338	-0.143932
O14976	GAK	31	31	1	1.06399	1.07658	0.895451	0.483831	0.2578	0.123028	0.0694735	1	1.02769	1.06061	0.865067	0.4837	0.244971	0.124188	0.0732686	1	1.05288	1.03996	0.865077	0.472788	0.237325	0.123539	0.0670192	1	1.05753	1.04246	0.846	0.463271	0.229374	0.138516	0.0820949	12.0164	-0.140067	0.0146097	0.991403	11.9159	-0.134706	0.000487663	0.996035	11.8417	-0.13687	0.0010775	0.996188	11.7006	-0.137009
O14977	AZIN1	1		1	1.18884	1.2325	1.23389	0.78395	0.668113	0.706233	0.853078									1	0.916121	0.95714	0.794466	0.609718	0.416182	0.458655	0.734559										-0.612289	0.742474	0.586328						-0.148353	0.545753	0.795588
O14979	HNRNPDL	30	23	1	1.01309	1.04659	0.894715	0.59227	0.546435	0.822041	1.11007	1	0.957067	0.961611	0.881816	0.624908	0.59123	0.71928	0.819115	1	0.981723	1.02175	0.873117	0.62064	0.565819	0.825799	0.978116	1	1.01399	1.03445	0.899014	0.750571	0.663118	0.815339	0.762625		-0.774766	0.767704	0.34843		-0.938959	0.688633	0.801653		-0.720915	0.747594	0.502825		-0.183048
O14980	XPO1	130	98	1	1.0099	0.983112	0.78888	0.45476	0.212587	0.106236	0.0676692	1	0.976736	0.961999	0.781437	0.448798	0.208622	0.103552	0.0777805	1	1.01754	1.01353	0.825068	0.455347	0.218326	0.109022	0.0725451	1	0.99344	0.96935	0.756344	0.414292	0.194981	0.106132	0.0683148	11.3868	-0.133733	0	0.998856	11.3119	-0.132698	0	0.997783	11.5648	-0.136546	0	0.999318	11.0334	-0.135278
O14981	BTAF1	31	25	1	1.01546	1.00856	0.820426	0.434115	0.19799	0.128317	0.156368	1	0.968238	0.969512	0.783054	0.416507	0.205167	0.134697	0.103958	1	1.0171	0.983278	0.785253	0.40881	0.191081	0.132711	0.14839	1	1.00029	0.934866	0.76877	0.390299	0.1992	0.130047	0.0998583	11.2934	-0.15254	0.092382	0.997688	11.1674	-0.135675	0.0313165	0.998544	11.0388	-0.149473	0.085379	0.998189	10.9741	-0.136431
O15013	ARHGEF10	26	16	1	0.976988	0.974704	0.807894	0.507742	0.313472	0.175458	0.115611	1	1.0019	1.02433	0.880288	0.519677	0.281179	0.136359	0.093754	1	0.992393	0.988131	0.836919	0.528506	0.303432	0.163249	0.104459	1	1.01518	1.02346	0.893088	0.537798	0.263277	0.126785	0.0945818	12.036	-0.109657	0	0.998412	12.2388	-0.126426	0	0.999002	12.2155	-0.115	0	0.999282	12.2969	-0.133319
O15014	ZNF609	12	15	1	0.986171	0.982789	0.742091	0.429505	0.256882	0.219395	0.242457	1	1.06658	1.1143	0.887101	0.507473	0.450198	0.353197	0.232429	1	0.955784	0.926458	0.750638	0.42254	0.241956	0.208793	0.240156	1	0.973144	1.04407	0.90233	0.684779	0.459063	0.306345	0.19705	10.9727	-0.13691	0.184023	0.997621	12.7589	-0.110802	0.247014	0.965497	10.954	-0.136588	0.1705	0.989995	14.2735	-0.087783
O15020	SPTBN2	16	12	1	0.976667	0.964331	0.76159	0.419411	0.336892	0.391799	0.358406	1	1.01006	0.944141	0.694766	0.444905	0.340169	0.371203	0.242811	1	0.952474	0.922393	0.712303	0.435274	0.347397	0.37767	0.319814	1	0.979191	0.960372	0.750698	0.468049	0.378445	0.352268	0.200283	10.6496	-0.193554	0.35901	0.994254	11.2822	-0.103411	0.207066	0.991198	11.1901	-0.115303	0.289876	0.987531	12.0711	-0.0897769
O15031	PLXNB2	48	49	1	0.9945	0.996977	0.815306	0.530737	0.329685	0.180602	0.0655055	1	0.985849	1.00088	0.863238	0.541347	0.327628	0.164908	0.0776842	1	0.988464	1.00551	0.841623	0.534141	0.333036	0.185261	0.0727768	1	1.00762	1.02975	0.874505	0.550668	0.305477	0.151282	0.0710629	12.2134	-0.112797	0	0.994888	12.4366	-0.117463	0	0.997566	12.3612	-0.113443	0	0.996222	12.4455	-0.123542
O15033	AREL1	4	1	1	1.00848	0.97368	0.848996	0.500193	0.263366	0.215942	0.245215	1	1.0585	0.670948	0.73592	0.468426	0.182778	0.316114	0.201046	1	1.02935	0.981405	0.772984	0.490032	0.295652	0.237297	0.183844	1	1.24135	1.48061	1.11013	0.615239	0.389684	0.294342	0.200632	11.7865	-0.140551	0.185004	0.996057	10.131	-0.0924124	0	0.900656	11.7633	-0.107575	0.0794939	0.998626	13.0141	-0.167154
O15037	KHNYN	6	2	1	1.00775	1.04818	0.890302	0.519331	0.296292	0.140168	0.106828	1	1.16035	1.20433	0.755843	0.530986	0.312205	0.229838	0.224978	1	1.01825	1.10151	0.879855	0.484409	0.277523	0.16698	0.134689	1	1.06731	1.13902	1.0488	0.58185	0.281137	0.204776	0.150608	12.2893	-0.12746	0.0210128	0.996806	11.9072	-0.11462	0.147474	0.935452	11.9493	-0.139686	0.0931402	0.990196	12.5236	-0.200012
O15040	TECPR2	13	10	1	0.986521	0.973918	0.866931	0.486562	0.306798	0.232537	0.198893	1	1.02455	1.05854	0.833014	0.529888	0.412509	0.318386	0.340073	1	1.0528	1.03581	0.845011	0.523426	0.310348	0.23354	0.216415	1	1.01773	1.0518	0.922067	0.56775	0.408671	0.332721	0.253433	11.9339	-0.133857	0.16781	0.999017	12.4457	-0.115734	0.299432	0.991867	12.1401	-0.122129	0.154997	0.995061	13.0123	-0.115738
O15042-2	U2SURP		30									1	1.03181	0.989124	0.840963	0.471645	0.18617	0.097989	0.0899499									1	1.01433	1.03311	0.885038	0.484313	0.224238	0.108412	0.0922959					11.6153	-0.144236	0.0102433	0.997935					11.8759	-0.148611
O15042	U2SURP	31		1	0.986485	0.976846	0.789699	0.446297	0.174858	0.0916958	0.12257									1	0.998635	0.985093	0.838109	0.456598	0.191441	0.100129	0.0864422									11.258	-0.140158	0.0213064	0.995815					11.544	-0.144212	0.0119464	0.999289
O15047	SETD1A	18	20	1	1.02178	1.12451	0.96507	0.568225	0.363504	0.212996	0.131308	1	1.0127	1.04019	0.850275	0.536793	0.343296	0.221599	0.131614	1	0.933171	0.92757	0.786288	0.513978	0.314133	0.174532	0.104174	1	1.01442	1.01658	0.864373	0.540544	0.337809	0.190011	0.111403	12.9286	-0.124901	0.0841695	0.981422	12.5615	-0.104287	0	0.996747	11.9253	-0.108172	0	0.989059	12.5311	-0.110556
O15055	PER2	1		1	0.996417	0.954754	0.740508	0.571906	0.428263	0.321273	0.218376									1	1.04072	0.935043	0.835656	0.597447	0.425008	0.220251	0.16799									12.8917	-0.0782243	0	0.995309					13.1053	-0.0928131	0	0.989536
O15056	SYNJ2	16	8	1	0.984447	1.10298	0.917567	0.58478	0.421599	0.259007	0.35149	1	0.797207	0.919535	0.736276	0.543395	0.337532	0.153525	0.0742684	1	0.955911	0.990013	0.848939	0.557125	0.377887	0.257848	0.234787	1	1.03377	1.09848	0.843796	0.669922	0.337211	0.204309	0.0883794	12.9693	-0.124504	0.284274	0.976092	11.8161	-0.106601	0	0.931479	12.7422	-0.101277	0.125999	0.996944	13.1823	-0.113408
O15060	ZBTB39	2		1	0.923286	1.24086	0.967564	0.622876	0.694175	0.774164	0.960314									1	0.919251	0.901159	0.816627	0.534774	0.498885	0.595713	0.704119										-0.618902	0.762882	0.528225						-1.16125	0.583373	0.840223
O15062	ZBTB5	1	1	1	1.21395	1.46149	0.932465	0.5673	0.299927	0.261543	0.239146	1	1.18682	1.00959	0.971066	0.53517	0.366289	0.234378	0.153888	1	0.880492	0.878288	0.823992	0.554845	0.286496	0.218321	0.0948021	1	0.895518	0.95519	0.765379	0.492438	0.263072	0.202546	0.130832	12.4573	-0.156493	0.222477	0.832885	12.6708	-0.133279	0.144815	0.963014	12.2627	-0.10847	0	0.964763	11.6589	-0.107486
O15063	KIAA0355	5	4	1	1.08191	1.06366	0.922919	0.55601	0.39351	0.384475	0.562828	1	1.00676	1.01696	0.808928	0.444141	0.246443	0.137341	0.104886	1	1.04547	0.982137	0.921556	0.490903	0.368109	0.394182	0.438362	1	0.950821	1.00724	0.879279	0.447832	0.23791	0.144682	0.0678439	12.7272	-0.168461	0.446685	0.948006	11.507	-0.129814	0.0259725	0.999267	11.7694	-0.194909	0.39827	0.991323	11.7283	-0.144941
O15066	KIF3B	10	6	1	1.00522	1.04284	0.898263	0.565206	0.383945	0.216614	0.315018	1	1.05285	1.02079	0.840703	0.559465	0.234591	0.0669625	0.047459	1	0.94662	0.979761	0.840488	0.57223	0.37247	0.230015	0.294985	1	0.958336	1.01519	0.8367	0.551507	0.189549	0.0930152	0.0724434	12.6531	-0.125993	0.234323	0.987308	12.1444	-0.143354	0	0.991664	12.6694	-0.105611	0.177523	0.987864	12.0063	-0.142303
O15067	PFAS	45	45	1	0.989556	1.01549	0.870928	0.605336	0.609645	0.802898	0.61876	1	0.911751	0.963994	0.852023	0.653891	0.648498	0.70326	0.277091	1	0.998503	1.02113	0.889236	0.649563	0.612498	0.795011	0.502006	1	1.00459	1.10107	0.928734	0.746443	0.687398	0.577792	0.16927		-0.879313	0.65916	0.879765	18.6336	-0.0482399	0	0.793696		-0.149993	0.635887	0.843273	17.0012	-0.072355
O15068	MCF2L	2	5	1	1.08299	1.00953	0.791441	0.437813	0.0909868	0.027389	0.0909645	1	1.2781	1.35445	0.926459	0.459021	0.380177	0.287319	0.177539	1	1.07621	1.08485	0.96712	0.462671	0.149929	0.0571404	0.0425866	1	1.08846	0.872826	0.934131	0.610976	0.447544	0.17902	0.176014	11.1149	-0.163325	0	0.986439	11.9842	-0.153278	0.23107	0.856006	11.8432	-0.210929	0.0331948	0.991502	13.5131	-0.101264
O15078	CEP290	3		1	1.01877	1.02689	0.781771	0.581495	0.419655	0.350288	0.0586695									1	0.961125	0.999461	0.840919	0.594813	0.452435	0.306071	0.114818									12.9637	-0.0901943	0	0.963661					13.3861	-0.0898077	0	0.983444
O15084	ANKRD28	20	8	1	1.0061	1.02476	0.811294	0.457177	0.213274	0.131702	0.129683	1	1.066	1.03485	0.872523	0.450722	0.206392	0.132109	0.078641	1	1.03595	0.994439	0.821206	0.450913	0.214004	0.133854	0.1064	1	1.06504	0.982815	0.802105	0.441778	0.202042	0.156906	0.0737204	11.4613	-0.13827	0.0540689	0.998078	11.64	-0.153014	0.0459586	0.995473	11.49	-0.137631	0.0369646	0.998676	11.4039	-0.131177
O15085-2	ARHGEF11	11	10	1	1.05161	0.995038	0.889688	0.523473	0.253205	0.144521	0.120693	1	1.03617	0.958741	0.848515	0.494541	0.221759	0.0976462	0.0920484	1	0.959369	1.01002	0.829483	0.520205	0.261808	0.156966	0.123912	1	0.987382	1.00544	0.890273	0.497508	0.236662	0.146883	0.0951771	12.1467	-0.138567	0.0558028	0.997509	11.8243	-0.135947	0	0.996686	12.0345	-0.119017	0.00786248	0.9974	11.9873	-0.14346
O15091	KIAA0391	18	18	1	0.996967	0.919976	0.744411	0.369554	0.125944	0.042418	0.0412938	1	1.03686	0.986298	0.77156	0.388578	0.139033	0.0858898	0.0669974	1	1.03947	0.959566	0.779101	0.380017	0.137812	0.0574758	0.0448351	1	1.01083	0.938103	0.776903	0.356513	0.155317	0.0893818	0.0626777	10.6608	-0.158798	0	0.993896	10.9143	-0.150988	0	0.997949	10.8897	-0.158923	0	0.997143	10.816	-0.153934
O15111	CHUK	25	26	1	1.00698	0.990574	0.779035	0.453722	0.210138	0.119689	0.130674	1	0.934595	0.93987	0.761985	0.401162	0.152299	0.0630957	0.0450781	1	0.971365	0.953899	0.761946	0.430139	0.209318	0.0901852	0.0642991	1	0.991333	0.959336	0.713766	0.379828	0.156063	0.0779573	0.0428936	11.3295	-0.130112	0.0259674	0.997814	10.9054	-0.150448	0	0.992393	11.1277	-0.134656	0	0.996693	10.6159	-0.145637
O15116	LSM1	5	3	1	0.939018	0.925604	0.836666	0.553084	0.55008	0.757075	1.06928	1	0.958217	1.06392	0.843779	0.651123	0.641514	0.784968	1.37177	1	0.915871	0.931241	0.852033	0.585896	0.531947	0.75641	0.980332	1	1.07512	1.14353	1.06915	0.88271	0.824862	0.878198	1.07598		-0.0932649	0.747065	0.287298		-0.468732	0.85863	0.101704		-0.0810706	0.724319	0.367434		-0.0553126
O15118	NPC1	9	9	1	1.06163	1.01812	0.866512	0.61838	0.557451	0.588556	0.479664	1	0.965377	0.980919	0.847208	0.553355	0.443697	0.378118	0.280759	1	0.971192	0.95698	0.834217	0.601932	0.536698	0.576897	0.460469	1	0.977954	0.984107	0.848657	0.616996	0.495068	0.412429	0.27121		-0.0992325	0.520778	0.975836	13.3314	-0.0887842	0.209969	0.993303		-0.086022	0.482212	0.976392	14.5956	-0.0685891
O15119	TBX3		1									1	1.02154	0.975834	0.907273	0.459003	0.292361	0.355064	0.304512									1	1.00938	1.02174	0.680628	0.509345	0.279109	0.239189	0.324063					11.5325	-0.189187	0.308786	0.994525					11.1419	-0.118669
O15120	AGPAT2	2	3	1	1.00252	0.972817	0.740171	0.413394	0.211398	0.135638	0.131559	1	1.0011	1.00713	0.883144	0.416105	0.22624	0.125199	0.102515	1	0.909933	0.963641	0.774192	0.397125	0.201306	0.138116	0.106059	1	1.03294	0.967347	0.89618	0.48598	0.228651	0.143498	0.0951332	10.9708	-0.129359	0.0370058	0.999045	11.4822	-0.16474	0.0827664	0.999146	11.0213	-0.139672	0.0450218	0.991628	11.9115	-0.149268
O15121	DEGS1	2	3	1	0.857241	1.01405	0.827732	0.574959	0.420716	0.347338	0.371264	1	1.08214	0.967651	0.817978	0.509229	0.528366	0.486417	0.212464	1	0.990744	1.07656	0.945451	0.628181	0.508151	0.386956	0.261937	1	0.961308	0.928814	0.786316	0.646214	0.413185	0.35948	0.279853	13.0344	-0.101825	0.307735	0.959664	14.1511	-0.0673528	0	0.93571	14.55	-0.083888	0.154539	0.981033	13.7841	-0.0717909
O15126	SCAMP1	8	9	1	1.03714	0.980373	0.911466	0.620115	0.645276	0.913393	1.24166	1	1.0471	1.03498	0.907654	0.623465	0.624313	0.792713	0.943457	1	1.01714	1.05667	0.885118	0.658963	0.629571	0.887511	1.18932	1	1.01019	1.00799	0.993086	0.74604	0.712821	0.777968	0.878088		-0.450686	0.855112	0.13289		-0.658647	0.745987	0.644508		-0.375994	0.841342	0.217144		-0.622039
O15127	SCAMP2	6	2	1	1.06036	1.1756	0.953292	0.623549	0.63079	0.88889	1.03947	1	1.0952	1.13279	1.01087	0.767858	0.729659	0.771277	0.96474	1	1.00183	1.11925	1.00657	0.66362	0.594372	0.893283	1.09114	1	0.971704	1.00205	0.860567	0.615794	0.634559	0.711472	0.734765		-0.558866	0.795674	0.429206		-0.151125	0.808187	0.648363		-0.190266	0.810635	0.357852		-0.842575
O15131	KPNA5	3		1	1.05953	1.0495	0.879356	0.495947	0.248489	0.141412	0.0466723									1	1.06756	1.06287	0.929841	0.520123	0.254517	0.125554	0.0847396									12.0319	-0.135891	0	0.994208					12.2331	-0.149366	0.0422006	0.992992
O15143	ARPC1B	22	24	1	0.969905	0.978736	0.83308	0.534406	0.455329	0.599267	0.577199	1	0.769397	0.883377	0.759411	0.550622	0.570181	0.527931	0.411773	1	0.980504	0.971845	0.836631	0.581166	0.483217	0.609175	0.57412	1	0.943957	0.926471	0.778655	0.68349	0.53596	0.635923	0.399035		-1.2155	0.54155	0.962194	17.4967	-0.0551136	0	0.789706		-0.184723	0.557953	0.969333	19.2909	-0.047823
O15144	ARPC2	41	54	1	0.98131	1.02522	0.881851	0.643541	0.625527	0.819201	0.941577	1	0.995712	0.970361	0.887303	0.643425	0.661669	0.827106	0.756955	1	0.971851	0.979925	0.867352	0.659804	0.629699	0.821028	0.820339	1	1.03087	1.04064	0.98575	0.780149	0.79388	0.82394	0.662063		-0.595477	0.757461	0.598509		-0.803508	0.722289	0.843165		-0.687528	0.732717	0.768201		-0.0933276
O15145	ARPC3	14	18	1	1.02169	1.01143	0.87175	0.592812	0.48809	0.403903	0.130338	1	1.0144	0.987341	0.862945	0.617462	0.497758	0.281073	0.0405857	1	1.02722	1.01619	0.911104	0.603632	0.488838	0.399226	0.15655	1	1.0443	1.04925	0.977809	0.681911	0.457531	0.197259	0.0526434	13.9883	-0.0809571	0	0.96846	13.629	-0.097908	0	0.967021	14.2325	-0.0810001	0	0.975333	13.9275	-0.120534
O15151	MDM4	7	4	1	0.971596	1.0471	0.852856	0.556828	0.401645	0.247925	0.11732	1	1.04643	1.03904	0.899071	0.606212	0.449344	0.287676	0.166987	1	1.061	1.08971	0.908826	0.578399	0.410343	0.256046	0.126742	1	1.04744	1.11146	0.927927	0.732686	0.473312	0.288583	0.186682	12.913	-0.0987841	0	0.990605	13.6915	-0.0905982	0	0.991411	13.28	-0.100248	0	0.983399	14.5636	-0.0941855
O15155	BET1	3	2	1	1.06293	0.974776	0.837415	0.5843	0.422911	0.376157	0.317062	1	1.06317	1.31988	1.02867	0.671306	0.495262	0.403361	0.338429	1	1.05301	1.08024	0.879905	0.585765	0.447882	0.400694	0.309994	1	1.07817	1.04756	0.911053	0.801675	0.457636	0.408979	0.0906861	13.401	-0.089564	0.238981	0.993069	14.2246	-0.120113	0.351932	0.876135	13.5157	-0.0993868	0.292983	0.982922	14.9859	-0.098054
O15160	POLR1C	21	16	1	0.950933	1.09085	0.936646	0.524186	0.282526	0.171983	0.144368	1	0.949038	0.975079	0.813687	0.475121	0.220647	0.0918404	0.0683328	1	0.981326	0.961031	0.839673	0.49381	0.267676	0.161581	0.11762	1	0.987485	0.972005	0.799355	0.453749	0.218456	0.104773	0.0607237	12.2623	-0.151976	0.118514	0.989893	11.5876	-0.135989	0	0.995936	11.9364	-0.120731	0.0164984	0.998641	11.4326	-0.13481
O15162	PLSCR1	3	2	1	0.956354	0.95241	0.905628	0.629679	0.600864	1.01021	1.19431	1	0.95491	0.910357	0.907119	0.658047	0.691715	0.902282	1.19021	1	1.08629	1.04412	0.912803	0.73649	0.610649	1.0503	1.50296	1	1.17727	1.02236	0.964424	0.756862	0.82439	1.15135	1.13825		-0.0763391	0.867668	0.0679937		-0.0844336	0.869682	0.0783522		-0.13643	0.962641	0.0133454		-0.0204169
O15164	TRIM24	9	9	1	1.01967	1.01169	0.879652	0.570082	0.337742	0.264512	0.203547	1	1.08072	1.02347	0.875212	0.565335	0.355508	0.251175	0.148316	1	1.02364	1.05912	0.927361	0.544773	0.34066	0.242188	0.158659	1	0.966934	0.996649	0.85927	0.547432	0.346	0.303185	0.164909	12.6949	-0.113552	0.138886	0.998968	12.8681	-0.1024	0.0236949	0.991648	12.6128	-0.126783	0.13082	0.993685	12.7124	-0.101234
O15169	AXIN1	4	2	1	1.00405	1.03661	0.84763	0.481006	0.244354	0.157899	0.164891	1	1.0033	0.905986	0.904013	0.371989	0.141089	0.0778049	0.121805	1	0.991283	1.03134	0.80794	0.48786	0.260585	0.180311	0.145343	1	0.992159	1.05309	0.730074	0.379105	0.214742	0.130472	0	11.7248	-0.140964	0.103128	0.9976	11.2243	-0.212308	0.0844467	0.991753	11.7479	-0.122699	0.0614294	0.998042	10.8523	-0.139482
O15173-2	PGRMC2	22	15	1	1.00239	0.998493	0.865087	0.609765	0.582483	0.875602	1.23626	1	0.603522	0.774975	0.714788	0.639442	0.648875	0.593458	0.766877	1	1.02281	1.04475	0.921321	0.658454	0.612842	0.914748	1.29555	1	0.869283	1.01894	0.676954	0.725166	0.57229	0.918402	0.733951		-0.441898	0.826028	0.161121			0.658583	0.729958		-0.317232	0.870398	0.11447		-2.40475
O15182	CETN3	10	6	1	1.00536	1.12833	0.928782	0.504229	0.487139	0.665648	1.15294	1	1.08313	1.09231	0.910028	0.563405	0.608882	0.793274	0.959496	1	0.865536	0.907874	0.738325	0.473048	0.418141	0.600625	0.848323	1	1.08662	1.04702	1.01679	0.908998	0.594585	0.769736	0.992491		-0.778052	0.70249	0.395139		-0.697401	0.731264	0.603883		-0.117388	0.593288	0.558516		-0.538983
O15197	EPHB6		1									1	0.953703	1.09946	0.92164	0.517404	0.524896	0.367599	0.171433									1	0.999076	1.20581	0.834096	0.652386	0.469879	0.278995	0.243537					13.942	-0.081269	0	0.944139					14.0083	-0.0831007
O15198	SMAD9		4									1	0.893518	0.989767	0.794919	0.549344	0.617408	0.507291	0.13439									1	1.03134	1.08356	0.989763	0.8915	0.60466	0.443177	0.200726					14.5826	-0.0665487	0	0.85736					16.5084	-0.0929575
O15212	PFDN6	23	26	1	1.0004	1.06049	0.91268	0.6419	0.625483	0.903951	1.35553	1	0.986408	1.01362	0.863848	0.656698	0.67538	0.950771	1.19537	1	0.965765	0.996525	0.829714	0.629018	0.619291	0.859896	1.12251	1	1.00371	1.08836	0.96407	0.819187	0.773406	0.950827	1.05354		-0.282838	0.881716	0.0843101		-0.388377	0.868413	0.142024		-0.388422	0.807679	0.252465		-0.260457
O15213	WDR46	1		1	1.03341	0.889412	0.697976	0.313454	0.138164	0.0871673	0.0410908									1	0.977545	0.938184	0.653986	0.277798	0.122757	0.0755549	0.067773									10.2538	-0.150811	0	0.992141					9.956	-0.157079	0.00359395	0.998113
O15226-2	NKRF	12	8	1	1.03481	1.04934	0.760702	0.342438	0.188219	0.134757	0.0960482	1	1.0758	1.00138	0.738382	0.351849	0.178186	0.115661	0.0967316	1	0.968586	0.920494	0.668774	0.317016	0.166629	0.136739	0.0980635	1	1.00904	0.918751	0.689279	0.331799	0.18694	0.131497	0.109735	10.6777	-0.163706	0.0792527	0.996451	10.6397	-0.152553	0.0505061	0.995389	10.1555	-0.137655	0.0216136	0.996301	10.3324	-0.134369
O15228	GNPAT	25	15	1	1.00428	0.975341	0.804731	0.443997	0.203789	0.0818353	0.0667321	1	0.674931	0.802016	0.654496	0.398335	0.153524	0.0510086	0.0370057	1	1.00184	0.998572	0.817275	0.445436	0.198835	0.0933775	0.0482354	1	0.914329	0.947627	0.579923	0.366109	0.131378	0.0774148	0.047225	11.3744	-0.14045	0	0.998687	10.0737	-0.134139	0	0.846923	11.4337	-0.143489	0	0.999383	9.81319	-0.141713
O15230	LAMA5	7	3	1	0.978334	1.06225	0.881955	0.514849	0.375917	0.360157	0.3764	1	1.04729	1.30757	0.900547	0.495395	0.521891	0.848737	0.511133	1	0.921338	0.948656	0.787269	0.492151	0.354592	0.319346	0.310041	1	1.05433	1.13482	1.08962	0.861243	0.55419	0.50765	0.596706	12.0936	-0.149673	0.354022	0.992699		-1.55372	0.594289	0.703083	11.8575	-0.115388	0.263473	0.987321		-0.321548
O15231-3	ZNF185	12	15	1	0.952889	1.01552	0.86108	0.587537	0.556879	0.709965	0.786168	1	0.822727	0.980947	0.842515	0.643553	0.578835	0.594387	0.50869	1	0.960411	0.9453	0.844733	0.61587	0.577695	0.682697	0.769842	1	0.943474	0.966956	0.813642	0.687061	0.540036	0.662336	0.550072		-1.05217	0.660137	0.836976		-0.0760657	0.515778	0.863915		-0.902606	0.661526	0.861632		-0.0683449
O15232	MATN3	1		1	0.965794	1.03027	0.967209	0.461011	0.22291	0.120389	0.0188157									1	0.973178	1.10108	0.747632	0.388553	0.187284	0.0767002	0.0844004									11.9544	-0.171584	0.0323265	0.993564					10.9074	-0.145623	0.0110857	0.988967
O15234	CASC3	5	3	1	0.996746	1.01494	0.907322	0.561997	0.526578	0.697251	0.984253	1	1.09224	1.08981	1.03001	0.666578	0.75398	0.928623	0.945985	1	0.942413	1.08792	0.852984	0.564545	0.546819	0.676186	0.754022	1	0.966714	1.01452	0.972002	0.810706	0.668624	0.871096	0.902477		-0.985958	0.69252	0.56959		-0.102314	0.824564	0.55004		-0.957395	0.635393	0.859848		-0.518445
O15235	MRPS12	7	6	1	1.0357	0.955467	0.791746	0.54881	0.469733	0.464385	0.375023	1	0.958287	0.9765	0.848145	0.60522	0.528292	0.483261	0.300426	1	1.03826	0.93453	0.824624	0.581079	0.461305	0.449586	0.335792	1	0.981937	1.00369	0.857409	0.692218	0.545562	0.506005	0.34673	13.8427	-0.0853443	0.34113	0.990996	15.341	-0.061475	0	0.976849	14.351	-0.0705791	0.17372	0.987552	16.5105	-0.0569789
O15240	VGF	1		1	0.864354	0.735296	0.97192	0.507495	0.489186	0.285402	0.58982									1	1.15776	1.06082	0.756449	0.636382	0.371596	0.29196	0.284127									16.0637	-0.0572437	0	0.624602					13.1082	-0.0851237	0.0941579	0.953516
O15243	LEPROT		1									1	0.579124	0.947848	0.666494	0.518519	0.128553	0.0411712	0									1	1.01887	1.04589	0.498528	0.403798	0.18638	0	0					10.8172	-0.140388	0	0.797716					9.67393	-0.147376
O15254	ACOX3	8	13	1	0.98152	1.06499	0.921208	0.602386	0.595341	0.852574	1.12349	1	1.09557	1.10384	0.933158	0.620394	0.589157	0.849336	1.00345	1	1.01669	1.05498	0.879709	0.629436	0.551704	0.774546	1.02707	1	0.984212	1.03551	0.964005	0.718375	0.672264	0.776603	0.797354		-0.532929	0.793447	0.305391		-0.777858	0.765586	0.513493		-0.702859	0.74569	0.493789		-0.681947
O15258	RER1	5	4	1	1.03761	1.02232	0.870978	0.470976	0.290597	0.186127	0.103296	1	1.03654	1.08154	0.862007	0.46955	0.271726	0.132217	0.065666	1	0.927375	0.876001	0.707822	0.438379	0.232494	0.157577	0.119691	1	1.06899	0.98137	0.805491	0.510237	0.250366	0.127147	0.0819209	11.9604	-0.12891	0.058383	0.996161	11.9113	-0.131124	0	0.991935	10.858	-0.112199	0	0.984579	11.8112	-0.124449
O15259-4	NPHP1	3		1	0.995761	0.980479	0.842105	0.489621	0.303812	0.314216	0.274558									1	0.910411	0.978424	0.817426	0.465601	0.300864	0.296488	0.254248									11.7538	-0.139696	0.258845	0.99765					11.5405	-0.13806	0.238577	0.987939
O15260	SURF4	8	10	1	1.02304	0.990632	0.857999	0.502596	0.298682	0.181272	0.0788076	1	1.04591	1.01983	0.843211	0.475766	0.232201	0.130695	0.0802565	1	1.03562	1.07914	0.948388	0.528262	0.306634	0.211074	0.0903836	1	1.02668	1.02672	0.803744	0.448398	0.23721	0.118327	0.0639613	12.1645	-0.118292	0	0.997923	11.7751	-0.132257	0.000730959	0.997786	12.4883	-0.135412	0.07486	0.988844	11.4954	-0.132077
O15264	MAPK13	13	14	1	0.987546	0.965865	0.845948	0.582141	0.429468	0.259221	0.0978431	1	1.20857	1.08739	0.912288	0.616984	0.449255	0.185823	0.110134	1	0.980358	1.01098	0.892695	0.6166	0.459263	0.223286	0.118032	1	1.03776	1.07256	0.969133	0.680242	0.423039	0.184696	0.112315	13.0937	-0.0963868	0	0.987757	13.4652	-0.107359	0	0.95073	13.5246	-0.100198	0	0.990413	13.7984	-0.116943
O15265-2	ATXN7	1	2	1	0.969024	1.1086	0.652041	0.165616	0.0472713	0.0207265	0.0437323	1	1.04543	0.953968	0.748933	0.358387	0.184695	0.202939	0.197089	1	0.72775	0.659548	0.40873	0.126187	0.0497518	0.0223897	0.0171459	1	0.882695	0.883045	0.672861	0.305819	0.172979	0.145411	0.143655	9.64567	-0.248885	0.0234663	0.991205	10.5296	-0.172709	0.166971	0.99438	7.19747	-0.178208	0	0.907888	10.0645	-0.137083
O15269	SPTLC1	18	23	1	1.00777	0.958827	0.762945	0.434453	0.179339	0.0668408	0.0406942	1	0.949912	0.986492	0.774489	0.430873	0.198889	0.0916251	0.0465347	1	1.0246	0.994908	0.802349	0.425287	0.188645	0.0874125	0.0510267	1	0.990789	0.987343	0.751292	0.414008	0.19441	0.0930493	0.0492837	11.0875	-0.143875	0	0.995848	11.1836	-0.139632	0	0.99641	11.2657	-0.145032	0	0.999056	11.0039	-0.138831
O15270	SPTLC2	21	18	1	0.984631	0.96998	0.814696	0.448858	0.198526	0.0933963	0.0694699	1	0.834638	0.90303	0.739679	0.412324	0.182428	0.0864627	0.0426723	1	0.988025	0.976114	0.772787	0.440726	0.193134	0.108693	0.0694118	1	0.963143	0.95153	0.672213	0.390467	0.16817	0.0910002	0.0508671	11.4343	-0.140256	0	0.998756	10.8677	-0.138543	0	0.96522	11.2186	-0.134922	0	0.998623	10.4521	-0.137041
O15287	FANCG	16	13	1	1.01792	0.994518	0.773846	0.407692	0.165518	0.0744128	0.0567607	1	1.05127	1.01699	0.775268	0.41318	0.218515	0.110504	0.107902	1	1.04385	0.973126	0.794205	0.417902	0.174641	0.0764566	0.0546948	1	0.972439	0.941987	0.75347	0.435797	0.20748	0.126023	0.0896626	11.03	-0.147772	0	0.99877	11.1518	-0.136248	0.0275622	0.996694	11.1669	-0.147473	0	0.997494	11.128	-0.126667
O15294	OGT	38	37	1	1.00737	0.990784	0.825701	0.537208	0.332339	0.185674	0.092607	1	0.983142	0.978845	0.850988	0.544737	0.316005	0.151069	0.0905592	1	1.00538	0.997394	0.8593	0.553548	0.337163	0.183373	0.104243	1	1.01922	1.03744	0.826208	0.540581	0.290223	0.148905	0.0885343	12.3196	-0.110108	0	0.997461	12.3609	-0.117555	0	0.997811	12.5556	-0.111402	0	0.998807	12.1879	-0.119107
O15297	PPM1D	1		1	1.22291	1.15755	1.40491	0.561241	0.441278	0.139464	0.199186									1	0.945169	1.01363	0.631599	0.375019	0.241452	0.12185	0.181288									12.5559	-0.222881	0.230946	0.830588					10.2519	-0.137114	0.101228	0.990065
O15304	SIVA1	2	1	1	0.94674	0.971868	0.886763	0.489766	0.30554	0.17338	0.0975231	1	0.65886	0.928243	0.795387	0.547225	0.261269	0.224037	0.180303	1	0.924251	0.947131	0.830921	0.484514	0.27114	0.163711	0.107637	1	1.06765	0.921943	0.802239	0.699912	0.373034	0.19303	0.279161	12.1798	-0.122856	0.0236355	0.994294	12.0886	-0.102418	0.0165659	0.831475	11.8815	-0.117793	0	0.992189	13.4181	-0.086627
O15305	PMM2	25	23	1	0.976624	1.02471	0.887219	0.62704	0.618696	0.729683	0.436086	1	0.985234	0.985678	0.860972	0.657076	0.658793	0.603867	0.190363	1	0.971409	0.959862	0.859504	0.626998	0.600581	0.694197	0.382983	1	1.00866	1.0375	0.931643	0.777589	0.692411	0.464787	0.115867		-0.102304	0.579165	0.864873	16.6426	-0.0589083	0	0.869231	20.0945	-0.045088	0	0.874299	16.4641	-0.0931066
O15315	RAD51B	5		1	0.948995	0.935777	0.795588	0.449288	0.24592	0.13746	0.122435									1	1.06432	1.04366	0.845834	0.46445	0.245358	0.151241	0.139508									11.4737	-0.121115	0.00557479	0.994276					11.6612	-0.140944	0.0845135	0.994435
O15318	POLR3G	5	2	1	0.9736	1.03895	0.911324	0.602482	0.519857	0.469019	0.405404	1	1.1367	1.0694	0.917773	0.646053	0.627138	0.446198	0.301514	1	1.04861	1.05	0.904312	0.588827	0.491503	0.496866	0.369295	1	0.999176	0.990449	0.944334	0.798641	0.622222	0.432845	0.381611	14.6495	-0.103198	0.419029	0.990079	16.1327	-0.0630999	0	0.941206	14.1534	-0.10765	0.410343	0.978748	17.0458	-0.0667032
O15320-6	CTAGE5	27		1	0.988947	0.970669	0.841956	0.606548	0.564464	0.743149	0.693454									1	1.00777	1.01987	0.917775	0.623743	0.589999	0.746113	0.670313										-0.930419	0.651904	0.903125						-0.901834	0.657542	0.940074
O15320	CTAGE5		19									1	1.05808	1.10727	0.944453	0.6955	0.655981	0.837038	0.684629									1	0.992679	1.06123	0.957456	0.758621	0.737238	0.802232	0.623801						-0.735814	0.718287	0.847106						-0.07519
O15327	INPP4B	10	7	1	0.973094	0.996967	0.804781	0.522655	0.390702	0.259502	0.096965	1	1.11834	1.13766	0.981783	0.609664	0.40679	0.23214	0.116687	1	1.04885	1.04068	0.885942	0.580394	0.400255	0.252589	0.109593	1	1.05138	1.06966	1.00402	0.588115	0.385426	0.187503	0.0983946	12.4731	-0.0974405	0	0.98917	13.509	-0.110229	0.00903371	0.966376	13.142	-0.101152	0	0.990905	13.2336	-0.121332
O15344	MID1	11	9	1	0.966538	1.05513	0.856342	0.490732	0.233599	0.120716	0.110986	1	0.887789	0.966853	0.871227	0.504342	0.257013	0.14309	0.108316	1	0.99983	0.951653	0.822913	0.468127	0.237481	0.128342	0.0992929	1	0.965176	0.956392	0.823213	0.528336	0.225454	0.14585	0.110424	11.8487	-0.138693	0.0357423	0.995606	12.0338	-0.131304	0.0296599	0.986807	11.658	-0.126764	0	0.998312	11.9345	-0.123098
O15347	HMGB3	11	17	1	0.983626	1.0674	0.874927	0.625006	0.54653	0.733532	0.924787	1	0.965921	1.00384	0.914748	0.68135	0.64542	0.78896	1.00983	1	1.01062	1.0218	0.881034	0.603011	0.557834	0.739884	0.892679	1	0.943395	1.00363	0.897317	0.691141	0.659793	0.811653	0.839922		-0.755488	0.707464	0.658147		-0.555453	0.781391	0.481051		-0.940768	0.698352	0.710464		-0.640226
O15353	FOXN1		2									1	1.10957	1.11926	0.898263	0.59368	0.455852	0.280433	0.228497									1	0.946374	0.973144	0.977747	0.688443	0.490004	0.314645	0.222205					13.5706	-0.0943356	0.105575	0.967388					14.5654	-0.0916774
O15355	PPM1G	39	47	1	0.970609	0.973665	0.847535	0.606031	0.580592	0.84523	1.05652	1	1.00345	0.984794	0.903183	0.653656	0.67481	0.845285	0.921418	1	0.999679	1.00448	0.885172	0.635777	0.601556	0.870436	1.00984	1	0.989163	1.00953	0.932107	0.798867	0.762229	0.80493	0.658838		-0.604952	0.772094	0.328131		-0.566526	0.773792	0.625135		-0.554709	0.779401	0.426614		-0.0343708
O15357	INPPL1	25	27	1	1.00858	1.0007	0.856307	0.58473	0.441376	0.240586	0.0998548	1	1.01425	1.02509	0.874838	0.617471	0.435104	0.192088	0.101614	1	0.99473	1.02468	0.887249	0.603485	0.43617	0.247436	0.11518	1	0.992548	1.00979	0.922506	0.656263	0.446189	0.161382	0.0937947	13.1695	-0.0981796	0	0.988823	13.3049	-0.105477	0	0.990292	13.398	-0.0989864	0	0.992543	13.6244	-0.115044
O15360	FANCA	10	9	1	1.05651	1.181	0.868541	0.464313	0.219203	0.132438	0.141038	1	0.97885	0.918234	0.701826	0.327364	0.13684	0.0767742	0.0662365	1	0.96756	1.00029	0.782089	0.409611	0.196474	0.118368	0.105623	1	1.01678	0.947156	0.681586	0.319626	0.138368	0.0857619	0.0607739	11.6575	-0.157182	0.094309	0.972601	10.3364	-0.149745	0	0.995838	11.1081	-0.141802	0.0374675	0.998686	10.2385	-0.149391
O15371	EIF3D	53	60	1	0.997577	0.99072	0.833415	0.532073	0.282083	0.0895835	0.0663709	1	0.92371	0.919909	0.80318	0.550301	0.274591	0.0843706	0.0572885	1	0.972517	0.938715	0.769819	0.504755	0.277181	0.0961128	0.0573597	1	0.972752	0.952685	0.809127	0.56051	0.238486	0.0976214	0.0611383	12.0769	-0.129734	0	0.995301	12.0028	-0.127667	0	0.979587	11.6226	-0.123348	0	0.988974	12.0256	-0.131177
O15372	EIF3H	37	37	1	0.991218	0.897976	0.765308	0.560545	0.490316	0.428484	0.200522	1	0.999643	0.970843	0.843115	0.645656	0.549376	0.379272	0.135079	1	1.01615	0.957698	0.799469	0.596594	0.533392	0.442609	0.198189	1	1.02255	0.982665	0.916027	0.792912	0.586805	0.367209	0.138396	13.5272	-0.0700876	0	0.96555	14.3991	-0.0787753	0	0.964234	14.312	-0.0685818	0	0.964362	15.5667	-0.0948285
O15379-2	HDAC3		4									1	0.729764	0.843906	0.774287	0.548765	0.387263	0.267647	0.190522									1	0.955474	1.02987	0.767813	0.60922	0.319079	0.259323	0.156734					12.3592	-0.084459	0	0.849369					12.6079	-0.0947892
O15379	HDAC3	9		1	1.0106	1.03556	0.864353	0.541067	0.334692	0.215254	0.0404246									1	0.984482	0.928498	0.82665	0.528204	0.330079	0.196227	0.0415902									12.513	-0.115318	0	0.990923					12.2283	-0.113391	0	0.987549
O15381	NVL	2		1	1.11406	1.00535	0.81223	0.431195	0.182403	0.0830062	0.101712									1	0.982679	1.18311	0.728383	0.359863	0.157175	0.110987	0.104325									11.3012	-0.14709	0.0205619	0.988838					10.6004	-0.164577	0.0678378	0.972822
O15382	BCAT2	23	15	1	0.9896	1.01516	0.877446	0.624389	0.583824	0.831143	1.1804	1	1.04924	1.03713	0.964866	0.652534	0.696079	0.927713	1.24978	1	0.961444	0.996006	0.849709	0.613849	0.553947	0.801624	1.03952	1	1.04123	1.03191	0.987969	0.750444	0.792826	0.924848	1.034		-0.505365	0.804938	0.229077		-0.292361	0.881527	0.133046		-0.622053	0.752236	0.390678		-0.324398
O15392-2	BIRC5	4	2	1	0.997148	1.03463	0.820502	0.547725	0.403263	0.330021	0.303949	1	1.11295	1.02316	0.965017	0.523917	0.406275	0.348479	0.266386	1	1.16802	1.22254	0.996561	0.591785	0.486412	0.38643	0.322714	1	1.15821	1.0334	0.991167	0.592454	0.443423	0.351262	0.255983	12.6867	-0.102953	0.249808	0.997213	12.418	-0.157702	0.309839	0.977763	13.3962	-0.132593	0.355514	0.907077	13.3404	-0.123225
O15397	IPO8	20	18	1	1.03634	0.977092	0.787991	0.445383	0.188704	0.0909194	0.0775975	1	1.00876	0.98026	0.863918	0.438858	0.189657	0.0932879	0.0632704	1	1.0286	0.988684	0.779021	0.431459	0.189218	0.106572	0.0855892	1	1.02954	1.0068	0.856499	0.434095	0.204847	0.1028	0.0606839	11.2897	-0.138265	0	0.997431	11.5462	-0.153664	0.012697	0.999686	11.2103	-0.135636	0	0.9986	11.5376	-0.148606
O15400	STX7	14	17	1	0.972388	0.981324	0.867238	0.602464	0.600312	0.985224	1.42566	1	0.886479	0.954705	0.871265	0.673168	0.657333	0.877677	1.11334	1	1.04674	1.07257	0.985833	0.680471	0.661501	1.03937	1.43158	1	0.963106	1.04955	0.872786	0.775885	0.715144	0.940136	0.973016		-0.254142	0.89618	0.029884		-0.0834596	0.837508	0.0947507		-0.139709	0.95323	0.0197203		-0.298928
O15403	SLC16A6	1		1	0.815505	0.952375	0.789302	0.449382	0.305423	0.205973	0.0668322									1	1.03938	0.900443	0.787409	0.382094	0.313164	0.208473	0.130013									11.6464	-0.112074	0	0.955267					11.2979	-0.112037	0.0376539	0.984751
O15417	TNRC18	1	5	1	1.3589	1.25707	0.932316	0.539805	0.414994	0.351354	0.526519	1	1.08865	1.11368	0.955038	0.545491	0.427116	0.50324	0.500221	1	0.858385	0.814823	0.73277	0.412693	0.223616	0.249769	0.272024	1	1.00051	1.00879	0.914831	0.585221	0.501194	0.517733	0.393641	12.4633	-0.17386	0.427793	0.802361	13.0414	-0.196034	0.47693	0.959584	10.786	-0.0929814	0	0.92778	14.3409	-0.118322
O15427	SLC16A3	17	14	1	0.943226	0.842993	0.68067	0.420752	0.201823	0.084288	0.0212868	1	0.948514	0.92467	0.737712	0.411536	0.210164	0.0759418	0.0199741	1	0.993923	0.940445	0.733708	0.46216	0.234901	0.108766	0.0432685	1	1.01276	0.93454	0.761187	0.445858	0.19741	0.0824394	0.036735	10.495	-0.129743	0	0.972782	10.9017	-0.138838	0	0.989766	11.1616	-0.126641	0	0.99269	11.1506	-0.138281
O15431	SLC31A1		2									1	0.75682	0.826898	0.710546	0.470562	0.307987	0.105503	0.0272787									1	1.27494	1.2109	0.843482	0.617951	0.253267	0.52349	0.228227					11.038	-0.115244	0	0.887633					12.786	-0.115443
O15438-4	ABCC3	2		1	1.0334	0.82921	0.820745	0.475648	0.177439	0.0575558	0.0193518									1	1.01784	0.998383	0.666882	0.434698	0.172814	0.094297	0									11.4995	-0.151637	0	0.972547					10.6239	-0.137986	0	0.988641
O15439	ABCC4	32	18	1	0.996962	0.934718	0.790561	0.443446	0.232101	0.117308	0.0708706	1	0.984667	0.950097	0.76733	0.425307	0.207891	0.114169	0.102016	1	1.02589	1.02423	0.812461	0.4707	0.229385	0.125109	0.0832877	1	1.02936	0.952809	0.770261	0.398491	0.20846	0.174833	0.11359	11.3699	-0.129346	0	0.996737	11.1548	-0.128876	0	0.997977	11.6255	-0.129953	0	0.998353	11.0134	-0.137118
O15440	ABCC5	5	2	1	0.99567	0.940928	0.788483	0.413999	0.215716	0.192581	0.168103	1	0.50988	0.695972	0.576606	0.39276	0.191417	0.142994	0.213327	1	0.965233	0.99108	0.761918	0.3929	0.202605	0.1275	0.0886516	1	0.883757	0.858767	0.560446	0.431396	0.21169	0.116895	0.20417	11.0824	-0.145238	0.126335	0.99638	4.87242		0	0.699836	10.9891	-0.137048	0.0216689	0.998935	9.77062	-0.109724
O15446-2	CD3EAP	17	8	1	0.991949	1.00298	0.784679	0.384602	0.235297	0.294386	0.421988	1	1.0672	1.11022	0.863296	0.493661	0.316225	0.412342	0.432603	1	0.960982	0.952734	0.716843	0.367501	0.246484	0.291335	0.408709	1	1.00524	0.983344	0.895309	0.520227	0.408024	0.416196	0.453843	10.3571	-0.236998	0.320758	0.975406	11.5689	-0.177442	0.386947	0.964718	10.0305	-0.243063	0.318304	0.974622	12.2107	-0.165614
O15460	P4HA2	20	15	1	0.966079	1.02518	0.864588	0.589882	0.395321	0.312025	0.156145	1	0.918752	0.960382	0.86617	0.647243	0.461925	0.244897	0.141506	1	1.00764	1.01886	0.881185	0.588077	0.413811	0.299553	0.156082	1	0.955941	0.889765	0.806754	0.600092	0.355529	0.222958	0.128924	13.3111	-0.0906199	0	0.992765	13.6917	-0.094464	0	0.98199	13.3977	-0.0913378	0	0.995143	12.6726	-0.0980037
O15479	MAGEB2	13	12	1	1.02096	1.02585	0.769052	0.419362	0.237745	0.165631	0.0923821	1	1.05897	1.02669	0.831475	0.425864	0.216808	0.120678	0.0193699	1	1.05245	1.01358	0.777933	0.424123	0.239448	0.160757	0.0838636	1	1.05005	0.935452	0.744195	0.436236	0.248802	0.141342	0.0415373	11.238	-0.127656	0.027469	0.997818	11.4542	-0.143597	0	0.994742	11.3177	-0.125448	0.00854393	0.99657	11.1514	-0.123955
O15498	YKT6	19	14	1	0.986186	0.971134	0.849165	0.613853	0.617768	0.925311	0.914237	1	1.02051	0.995021	0.867936	0.677194	0.725641	0.978239	0.715829	1	1.01241	1.0225	0.903687	0.650163	0.667636	0.904263	0.812004	1	1.04661	1.04296	1.07031	0.837151	0.867794	0.920282	0.572928		-0.59806	0.767792	0.464143		-0.562369	0.774226	0.614809		-0.612163	0.758517	0.71189		-0.119179
O15504	NUPL2	1		1	1.05647	1.32202	1.13133	0.610236	0.353174	0.302477	0.234361									1	0.97535	0.946319	0.713097	0.456731	0.350057	0.209686	0.225663									12.5955	-0.234231	0.283183	0.897844					11.4707	-0.0963684	0.0465363	0.995868
O15511	ARPC5	16	16	1	0.986257	0.984307	0.83797	0.593201	0.58217	0.750623	0.873625	1	0.985571	0.939724	0.873804	0.641911	0.648834	0.775785	0.817241	1	0.979875	0.981227	0.861658	0.652109	0.585293	0.781674	0.827323	1	0.990294	1.02636	0.913417	0.747335	0.765516	0.81902	0.75757		-0.873994	0.699905	0.711812		-0.834534	0.720943	0.80042		-0.744338	0.7116	0.771877		-0.58247
O15514	POLR2D	12	16	1	0.96977	0.983633	0.873342	0.617405	0.568136	0.890004	1.14613	1	0.862416	0.912331	0.838258	0.637744	0.661092	0.796616	0.919056	1	0.973692	1.04343	0.859367	0.637499	0.61486	0.844258	1.03539	1	0.934636	1.01735	0.887216	0.742971	0.689137	0.805529	0.80599		-0.492858	0.805418	0.20084		-0.0805948	0.763999	0.327308		-0.460676	0.783001	0.416405		-0.604247
O15516	CLOCK	5	3	1	1.01558	0.973562	0.780224	0.418907	0.191523	0.135701	0.0842031	1	0.963629	0.975793	0.807244	0.446379	0.225426	0.110778	0.0736591	1	1.08738	1.03214	0.798173	0.462765	0.210349	0.125711	0.0793185	1	1.06393	1.01731	0.945845	0.478605	0.243529	0.102094	0.0832446	11.1691	-0.134487	0.00965803	0.999124	11.4571	-0.133118	0	0.998321	11.4943	-0.131868	0	0.992253	11.9964	-0.165666
O15522	NKX2-8	2		1	0.920418	0.934775	0.810392	0.566236	0.676145	1.13615	1.7962									1	1.03112	1.01034	0.818662	0.596985	0.608086	1.04396	1.4751																		-0.373718	0.90856	0.0363319
O15527-4	OGG1	1		1	0.929745	0.930912	0.743248	0.387503	0.142748	0.045336	0									1	1.16763	1.05194	0.842107	0.422953	0.132574	0.0464743	0.0778354									10.7395	-0.15761	0	0.988665					11.3136	-0.167699	0.00736586	0.9783
O15528	CYP27B1	1		1	0.994944	1.0247	0.822823	0.422424	0.199853	0.104788	0.17054									1	0.939103	0.852304	0.74583	0.424472	0.191179	0.111854	0.105666									11.2308	-0.158434	0.098106	0.995522					10.9222	-0.125497	0	0.97813
O15530	PDPK1	15	11	1	1.01287	1.00955	0.819886	0.482435	0.235851	0.0836697	0.0267477	1	1.08248	1.0665	0.915156	0.519519	0.229411	0.0870889	0.0491878	1	0.988095	1.03461	0.883052	0.562924	0.30109	0.102318	0.0431096	1	0.97749	0.971338	0.87052	0.53323	0.220236	0.0845445	0.0408546	11.6727	-0.140226	0	0.996186	12.1648	-0.151973	0	0.991745	12.4678	-0.135097	0	0.995187	12.0813	-0.147557
O15533-3	TAPBP	3	5	1	1.01042	0.791603	0.724229	0.560003	0.38923	0.532949	0.372105	1	0.847238	0.795601	0.801071	0.532158	0.353921	0.400485	0.429298	1	1.21733	0.972718	0.942199	0.62924	0.50976	0.564548	0.615643	1	0.928418	0.980633	0.744865	0.458941	0.421759	0.446283	0.369322	14.2363	-0.0645341	0	0.943086	13.488	-0.0665217	0	0.862919		-0.147766	0.564032	0.883548	11.246	-0.156315
O15534	PER1	8	4	1	1.01116	1.11513	0.940619	0.570359	0.488331	0.376968	0.205586	1	1.12147	1.3461	1.01397	0.680756	0.522697	0.429871	0.250265	1	0.949646	0.973443	0.835558	0.548933	0.44674	0.358207	0.185847	1	0.987391	0.943331	0.859509	0.633235	0.423961	0.322625	0.243712	13.9585	-0.0887357	0.123591	0.96286	15.1097	-0.0869635	0.175771	0.853354	13.3744	-0.0802522	0	0.984363	13.8363	-0.0796093
O15541	RNF113A		4									1	1.14984	1.1319	0.968092	0.557283	0.328116	0.280126	0.280806									1	0.946394	0.985858	0.813595	0.467259	0.315181	0.305006	0.277011					12.4119	-0.178694	0.272142	0.962357					11.5374	-0.138578
O15550	KDM6A	3	4	1	1.04625	1.17019	0.820814	0.484651	0.347227	0.347646	0.201812	1	1.07266	1.05726	0.82866	0.559957	0.37743	0.239989	0.102934	1	0.967252	0.939217	0.788435	0.506353	0.331938	0.255269	0.186059	1	1.18638	1.12469	0.900722	0.59164	0.321458	0.197544	0.145136	11.9295	-0.124925	0.229456	0.958753	12.7226	-0.101205	0	0.986082	12.1641	-0.0931292	0	0.996702	12.804	-0.120757
O15551	CLDN3	5	3	1	1.01931	1.04371	0.914083	0.571376	0.61088	0.880311	1.1483	1	1.01509	1.01351	0.894428	0.580192	0.551694	0.609896	0.659194	1	0.977038	1.02516	0.913031	0.601894	0.60544	0.87759	1.06482	1	0.986607	1.09481	1.00989	0.714762	0.603908	0.566938	0.607987		-0.551109	0.802717	0.269981		-1.04781	0.600244	0.977981		-0.571523	0.787437	0.339409		-0.188483
O15554	KCNN4	2	2	1	1.05637	1.0309	0.795271	0.496691	0.270423	0.219378	0.151996	1	1.08034	1.02261	0.847404	0.488025	0.251208	0.190227	0.146582	1	0.964276	0.888754	0.726201	0.433637	0.28877	0.229603	0.149902	1	1.00685	1.03749	0.824583	0.48931	0.274241	0.215985	0.122348	11.8061	-0.116246	0.0705087	0.994313	11.814	-0.134415	0.0961581	0.99338	11.1728	-0.100218	0	0.992243	11.8998	-0.119772
O43143	DHX15	101	74	1	0.983114	0.980167	0.832626	0.603959	0.568256	0.764364	0.888825	1	0.988059	0.98878	0.8615	0.637039	0.633956	0.746402	0.781792	1	0.971063	1.0106	0.862788	0.627913	0.589305	0.751702	0.814429	1	0.999001	1.04156	0.926924	0.763822	0.733719	0.783324	0.697979		-0.742338	0.706351	0.669213		-0.791081	0.699798	0.894361		-0.788786	0.695838	0.818262		-0.0794171
O43148-2	RNMT	17	22	1	0.987034	1.04808	0.892214	0.584314	0.517257	0.515561	0.249528	1	0.976578	1.03384	0.863861	0.620482	0.596305	0.454347	0.123195	1	0.938137	0.967549	0.825564	0.560664	0.478913	0.479247	0.200567	1	1.01464	1.05262	0.955055	0.792979	0.568496	0.368461	0.143328	15.0703	-0.0680525	0.0821115	0.947488	14.866	-0.0741034	0	0.928946	14.1046	-0.0697314	0	0.94972	15.5227	-0.0957149
O43149	ZZEF1	26	13	1	1.01368	1.02988	0.885683	0.515228	0.272904	0.160552	0.157969	1	1.01521	1.0069	0.855078	0.471012	0.227322	0.143697	0.128187	1	0.997554	1.00137	0.849429	0.506121	0.250082	0.151284	0.123077	1	0.98831	0.979637	0.855386	0.470544	0.224492	0.146377	0.133629	12.101	-0.138594	0.0982256	0.998367	11.6934	-0.143782	0.0721794	0.999444	11.9562	-0.128946	0.0384783	0.999582	11.6769	-0.14454
O43150	ASAP2	1	3	1	0.950182	1.06337	0.940441	0.624448	0.521094	0.255767	0.15206	1	1.07289	1.01816	0.869093	0.632527	0.350316	0.085491	0.0399699	1	1.01423	0.921699	0.901637	0.60244	0.470787	0.221212	0.157871	1	1.04238	1.16265	1.0233	0.688473	0.32313	0.147851	0.113652	14.0964	-0.0938029	0	0.977062	12.9406	-0.134679	0	0.984859	13.5471	-0.0952338	0	0.983786	13.3174	-0.157554
O43156	TTI1	25	15	1	1.01013	0.969239	0.779918	0.444939	0.2043	0.0818967	0.0670014	1	0.975803	0.995066	0.816106	0.452118	0.203411	0.106355	0.0758204	1	1.0255	0.976214	0.838735	0.453596	0.213336	0.109034	0.079748	1	1.02527	0.973131	0.855555	0.445655	0.211301	0.116535	0.0731292	11.2675	-0.137274	0	0.997684	11.4803	-0.137533	0	0.999188	11.5891	-0.138259	0.00287833	0.999083	11.5927	-0.144585
O43157	PLXNB1	2		1	0.814484	1.01044	0.870731	0.548806	0.296757	0.159994	0.0504062									1	0.95262	1.04686	0.759231	0.539808	0.25462	0.165191	0.0860387									12.3977	-0.125132	0	0.964037					11.8251	-0.115804	0	0.988272
O43159	RRP8	4	1	1	1.47481	1.04339	0.676704	0.306867	0.177683	0.191901	0.254859	1	0.929823	0.846819	0.478865	0.150188	0.0666572	0.0338899	0.0508518	1	1.00457	1.03901	0.636625	0.249525	0.169798	0.306956	0.193185	1	1.0289	0.840554	0.606117	0.191884	0.0975093	0.0328386	0	9.89061	-0.218868	0.204674	0.860163	8.51168	-0.175879	0	0.990121	9.43622	-0.337319	0.225	0.98831	9.40823	-0.177798
O43164	PJA2	7	3	1	0.995929	1.20409	1.03651	0.598753	0.387308	0.325246	0.303792	1	0.911999	1.00016	0.923911	0.584515	0.346387	0.443902	0.268527	1	0.931649	0.903049	0.811652	0.482649	0.346432	0.244455	0.19972	1	0.985979	0.966661	0.902182	0.592302	0.398466	0.422008	0.368857	12.6838	-0.200904	0.323591	0.951782	12.8296	-0.133331	0.314787	0.964497	12.1164	-0.0956203	0.0333822	0.984402	13.1434	-0.12231
O43166	SIPA1L1	2	1	1	0.945962	0.969135	0.826287	0.405063	0.244551	0.225236	0.174798	1	0.918079	1.13398	1.1761	0.491457	0.344154	0.23703	0.174907	1	1.00717	1.03485	0.7744	0.38958	0.195745	0.167037	0.307265	1	1.09766	1.11652	0.81251	0.512084	0.457539	0.24398	0.19476	11.1619	-0.159694	0.170938	0.995409	11.9897	-0.337697	0.248187	0.942301	10.661	-0.182576	0.210972	0.98355	12.8188	-0.0918493
O43167	ZBTB24	3	1	1	1.01237	0.956651	0.798118	0.375844	0.197365	0.15904	0.099049	1	2.35841	0.780859	0.670034	0.403862	0.235517	0.128333	0	1	0.959807	0.94952	0.704937	0.364025	0.219587	0.152216	0.0574802	1	1.07189	1.72008	0.926647	0.358694	0.234257	0.381001	0	10.9785	-0.154152	0.0785464	0.997995	10.2034	-0.12049	0	0.523854	10.6405	-0.127542	0	0.996273	11.1865	-0.220505
O43169	CYB5B	22	30	1	1.00972	1.00066	0.881757	0.617878	0.623831	0.950035	1.50863	1	1.04675	1.02929	0.91848	0.681465	0.839106	1.28171	1.69103	1	0.952125	1.02086	0.902622	0.614264	0.624681	0.93678	1.34464	1	1.06848	1.10312	1.04609	0.883935	0.929345	1.19938	1.43125		-0.414683	0.916426	0.0261372		0.932349	1.5	0.738723		-0.275782	0.88009	0.05643		0.693028
O43172	PRPF4	26	24	1	1.03857	1.04426	0.906754	0.612092	0.481252	0.244846	0.0663625	1	0.933314	0.954663	0.809665	0.607966	0.451068	0.150846	0.0670266	1	0.969888	1.00043	0.869745	0.572942	0.459788	0.221177	0.068373	1	0.966685	0.994116	0.847741	0.652277	0.370921	0.133041	0.0726233	13.622	-0.102826	0	0.97848	12.954	-0.105705	0	0.965194	13.1479	-0.102361	0	0.979906	13.1013	-0.120362
O43175	PHGDH	76	54	1	0.987742	0.960506	0.829099	0.492222	0.266775	0.146311	0.0754568	1	0.966238	0.958418	0.817367	0.493552	0.245189	0.107533	0.071036	1	1.01422	1.00754	0.838506	0.51015	0.283823	0.142623	0.0756609	1	0.986422	0.996887	0.809842	0.469829	0.231293	0.10999	0.0674853	11.8712	-0.123461	0	0.998235	11.7446	-0.129954	0	0.996211	12.0469	-0.123063	0	0.998616	11.5879	-0.132509
O43181	NDUFS4	4	7	1	0.975768	1.03477	0.874763	0.527867	0.310685	0.353463	0.528332	1	1.06272	1.05441	0.875431	0.502092	0.322408	0.397432	0.559798	1	1.01331	1.08662	0.789843	0.581065	0.299918	0.389107	0.547488	1	0.995617	0.955396	0.820952	0.48483	0.399238	0.544876	0.492831	11.9091	-0.168026	0.39933	0.948555	11.5864	-0.197827	0.431066	0.942749	12.2736	-0.137164	0.417683	0.920178	10.666	-0.340878
O43189	PHF1	1		1	0.868618	0.898252	0.831654	0.483903	0.382783	0.297619	0.118509									1	0.903233	1.08601	0.943891	0.573356	0.432912	0.250457	0.118762									12.3922	-0.0932346	0	0.953042					13.4093	-0.101868	0	0.97189
O43236-4	2021-09-04		2									1	1.03741	1.09554	0.941209	0.549359	0.446045	0.521738	0.379279									1	0.952568	1.24803	0.994399	0.787101	0.494903	0.618745	0.36458					12.8857	-0.163087	0.44177	0.967032					16.4847	-0.11054
O43237	DYNC1LI2	20	23	1	0.974363	1.14499	0.981447	0.566805	0.329784	0.151535	0.0650133	1	0.902899	1.01016	0.9153	0.577046	0.298083	0.116661	0.0708878	1	0.925827	0.931544	0.810138	0.523206	0.296643	0.147451	0.0629479	1	0.953233	1.02325	0.86917	0.576295	0.280323	0.142675	0.0858284	12.8562	-0.132226	0.000484283	0.978416	12.6367	-0.134233	0	0.990489	11.9976	-0.118424	0	0.986717	12.4886	-0.125686
O43240	KLK10		1									1	1.20824	1.39048	1.10509	0.534422	0.714403	0.614873	0.588473									1	1.07836	0.94543	1.3021	0.744414	1.1827	0.846631	0.798038						-0.22996	0.614515	0.688893						-0.350751
O43242	PSMD3	61	50	1	1.00911	1.00347	0.828049	0.564109	0.328889	0.125654	0.0572595	1	0.986214	0.968666	0.842276	0.56667	0.27241	0.0654704	0.0312408	1	0.984138	0.962173	0.804854	0.562495	0.3122	0.1272	0.0726658	1	1.0044	1.00225	0.858629	0.526248	0.224119	0.0721355	0.0358197	12.3759	-0.120798	0	0.99248	12.2621	-0.140082	0	0.990561	12.2161	-0.117821	0	0.991214	12.0107	-0.147637
O43251-8	RBFOX2	7	8	1	0.993681	0.998946	0.764729	0.446126	0.28441	0.225119	0.259133	1	1.04125	0.982795	0.83404	0.498989	0.324384	0.313107	0.359602	1	1.02145	1.04343	0.808571	0.504935	0.275646	0.243229	0.258021	1	1.00402	1.00559	0.818194	0.512478	0.314086	0.537334	0.380602	11.2	-0.134997	0.201315	0.997804	11.7372	-0.143245	0.30971	0.992542	11.7266	-0.129894	0.196362	0.993323	11.7289	-0.159653
O43252	PAPSS1	53	42	1	0.99218	1.07224	0.926315	0.627903	0.639331	0.845917	0.619289	1	0.904499	0.949639	0.861237	0.625753	0.637019	0.704263	0.201116	1	0.992829	1.00943	0.880342	0.632747	0.615177	0.772462	0.43479	1	1.00991	1.09463	0.927024	0.744541	0.716829	0.615999	0.12757		-0.850022	0.68311	0.832789	17.3543	-0.0528577	0	0.754259		-0.107789	0.596719	0.824245	17.2155	-0.0776237
O43255	SIAH2		2									1	0.81508	0.810362	0.806588	0.648152	0.596067	0.666736	0.7738									1	0.958179	1.14254	0.861215	0.672555	0.588168	0.697167	0.5648							0.312834	0.714132						-0.104765
O43257	ZNHIT1	1		1	0.810927	1.30215	1.21731	0.618647	0.303834	0.141178	0.0758898									1	0.840303	0.935062	0.624392	0.487165	0.289346	0.0545842	0.209853									12.9179	-0.185925	0.0934932	0.882434					10.727	-0.106431	0	0.935154
O43264	ZW10	31	18	1	1.03968	0.986746	0.798702	0.424678	0.1754	0.0841731	0.0745253	1	1.03913	0.995674	0.773079	0.416185	0.173147	0.101019	0.0763231	1	1.04103	0.993487	0.788255	0.422326	0.173042	0.0965567	0.0802681	1	0.972794	0.952122	0.77083	0.38373	0.179246	0.0928463	0.0726243	11.2268	-0.14449	0	0.99799	11.0923	-0.140328	0	0.998065	11.1799	-0.141643	0	0.997894	10.943	-0.142465
O43278	SPINT1	20	20	1	0.96014	0.944371	0.847744	0.625664	0.631691	0.944247	1.40711	1	0.771877	0.949713	0.863426	0.668406	0.707544	0.877376	1.08149	1	0.964729	1.01392	0.864511	0.665162	0.63845	0.967435	1.32864	1	0.943479	1.08356	0.85383	0.799394	0.776663	1.03604	1.03832		-0.267958	0.891291	0.0264262		-0.0944716	0.839139	-0.101833						-0.360119
O43286	B4GALT5	1	1	1	1.1177	0.971237	1.15385	0.607999	0.439956	0.398632	0.62645	1	0.544016	0.706579	0.689579	0.484894	0.353259	0.196515	0.199474	1	0.957791	0.764689	0.920578	0.465205	0.50473	0.350517	0.401842	1	0.851401	0.949484	0.492488	0.532572	0.270002	0.249982	0.185999	12.2699	-1.27239	0.488346	0.896039	6.44669		0	0.637678	14.1803	-0.063451	0	0.84503	10.4118	-0.0970032
O43290	SART1	23	18	1	0.955436	0.848261	0.566225	0.215382	0.0955977	0.086405	0.0881006	1	0.967697	0.939413	0.650421	0.281105	0.141671	0.127683	0.0955638	1	1.02354	0.883406	0.606578	0.229283	0.100832	0.0947222	0.0908711	1	1.01417	0.912317	0.635521	0.277005	0.17464	0.165822	0.131321	9.07416	-0.150828	0	0.989085	9.92239	-0.160717	0.0564198	0.997274	9.47332	-0.155062	0.0070346	0.992363	9.80251	-0.151656
O43291	SPINT2	10	8	1	0.974705	1.0568	0.884358	0.607659	0.555943	0.712008	0.936693	1	0.9651	0.938435	0.841983	0.580038	0.593518	0.722624	0.832041	1	0.931796	0.97714	0.8597	0.585279	0.555254	0.733961	0.84559	1	1.0357	1.06973	0.978545	0.69487	0.722689	0.777717	0.785919		-0.74526	0.703076	0.647285		-1.16964	0.682056	0.744547		-0.935191	0.680021	0.705362		-0.694568
O43292	GPAA1	11	7	1	0.996417	0.936324	0.785727	0.433255	0.182564	0.060552	0.0400472	1	0.936118	0.945429	0.767378	0.402534	0.18761	0.0787042	0.0439153	1	1.02765	1.00476	0.810092	0.459574	0.200092	0.0824701	0.0538734	1	0.985666	0.978854	0.780574	0.402525	0.184531	0.0927865	0.0549252	11.1833	-0.146777	0	0.994802	10.9949	-0.14374	0	0.99369	11.4645	-0.142472	0	0.997932	11.0733	-0.143547
O43293	DAPK3	4	3	1	1.02061	0.92659	0.706666	0.312361	0.129231	0.175626	0.260128	1	1.00425	0.844297	0.481586	0.144789	0.0372492	0.0412247	0.0122251	1	1.0736	0.98639	0.647734	0.318759	0.153283	0.119622	0.177607	1	0.973547	0.794312	0.47445	0.136989	0.057257	0.0526411	0.0353855	10.0445	-0.210649	0.182694	0.982924	8.53683	-0.184021	0	0.992227	9.97246	-0.169106	0.112973	0.992001	8.20983	-0.171686
O43294	TGFB1I1	1	3	1	0.98572	1.06968	0.879365	0.51825	0.376462	0.376284	0.367501	1	1.12085	1.11906	0.9784	0.578851	0.521251	0.492513	0.558467	1	0.932615	0.996834	0.931042	0.502208	0.392677	0.372868	0.389475	1	1.01732	1.09034	0.982808	0.628304	0.619678	0.569328	0.495265	12.142	-0.146841	0.355547	0.991882		-0.19859	0.523213	0.944225	12.0114	-0.179329	0.377037	0.992355		-0.148619
O43295	SRGAP3	1	3	1	1.15612	1.14304	0.709676	0.441352	0.25397	0.156212	0.0543735	1	1.51518	0.980645	0.984365	0.494609	0.302974	0.406399	0.5016	1	1.23505	1.17233	0.963981	0.454912	0.169492	0.129812	0.0790799	1	0.995299	1.23635	0.869027	0.474511	0.446168	0.580881	0.265403	11.1899	-0.123438	0	0.960823	11.9928	-1.45041	0.403658	0.761191	11.7833	-0.214473	0.0910633	0.949593	11.6739	-0.184117
O43299	AP5Z1	6	3	1	1.09666	0.959328	0.752896	0.518179	0.560716	0.536662	0.745715	1	1.10587	1.12131	0.896351	0.584818	0.495237	0.635363	0.830454	1	0.984155	0.972914	0.717751	0.465325	0.381217	0.522899	0.732746	1	0.968333	1.00593	0.929027	0.572973	0.52049	0.576893	0.644004		-1.11048	0.590318	0.876794		-0.936432	0.636468	0.786826		-1.20478	0.525547	0.841254		-1.42478
O43301	HSPA12A	24	19	1	0.997576	0.963932	0.807326	0.519486	0.36031	0.300407	0.150376	1	1.0093	1.02488	0.877073	0.539598	0.376988	0.278233	0.130202	1	1.01595	1.02407	0.866785	0.537448	0.366073	0.293606	0.157945	1	0.999576	0.994506	0.878108	0.564625	0.376347	0.243996	0.14974	12.4961	-0.0914653	0	0.99447	12.8986	-0.0978464	0	0.993047	12.7545	-0.101164	0.06983	0.993992	12.9664	-0.0988962
O43303	CCP110	8	5	1	1.10116	1.04842	0.849933	0.473973	0.283814	0.214433	0.238055	1	1.15115	1.14061	0.850786	0.517558	0.272289	0.262358	0.297908	1	0.939926	0.927155	0.788149	0.459467	0.262454	0.213629	0.205226	1	1.06596	1.04575	0.807582	0.50014	0.316823	0.288319	0.263829	11.669	-0.145417	0.193778	0.986788	11.857	-0.144452	0.241989	0.955019	11.4343	-0.124137	0.130803	0.99014	11.8221	-0.125022
O43306	ADCY6	1		1	0.945338	0.978481	0.669393	0.411364	0.157289	0.0611412	0.0700968									1	1.01805	0.99454	0.771428	0.354108	0.197265	0.135605	0.0871236									10.5097	-0.138826	0	0.991018					10.8053	-0.154216	0.0618886	0.99935
O43310-2	CTIF	9		1	0.996403	1.05987	0.841413	0.593029	0.531023	0.488263	0.195496									1	1.01675	1.01939	0.894548	0.625641	0.505486	0.424632	0.159599									14.7366	-0.0686449	0	0.946146					14.493	-0.0778172	0	0.971574
O43310	CTIF		5									1	0.91839	0.928214	0.81896	0.575689	0.410617	0.297243	0.0946264									1	0.938773	0.997948	0.858368	0.567462	0.434445	0.247114	0.0470387					12.9246	-0.0924031	0	0.971358					13.0113	-0.102753
O43314	PPIP5K2	26	13	1	1.00567	1.0542	0.877206	0.497165	0.32325	0.230352	0.259775	1	0.984822	0.993051	0.770816	0.414399	0.201449	0.13312	0.104402	1	0.932707	0.961965	0.797559	0.46874	0.281214	0.213967	0.186014	1	0.9787	0.964567	0.782143	0.420256	0.224319	0.126845	0.0940535	11.9637	-0.142184	0.21895	0.995174	11.1061	-0.135978	0.0316045	0.999531	11.6118	-0.1204	0.112591	0.993833	11.2498	-0.128127
O43318	MAP3K7	10	14	1	0.956926	0.969995	0.847582	0.557816	0.380841	0.179951	0.0437301	1	0.985981	1.03366	0.919923	0.582392	0.432551	0.298349	0.188328	1	0.978143	0.950927	0.830354	0.560521	0.35902	0.174791	0.0775124	1	0.988592	1.0735	0.926777	0.632582	0.377586	0.245197	0.171879	12.6174	-0.112682	0	0.985973	13.4925	-0.095498	0.0723045	0.992596	12.5012	-0.110124	0	0.991385	13.3668	-0.110274
O43324	EEF1E1	17	14	1	0.988613	1.01472	0.77356	0.450934	0.215213	0.131399	0.0542159	1	1.00274	1.02536	0.843953	0.442684	0.220246	0.108157	0.032692	1	1.00638	0.948235	0.761353	0.441274	0.223852	0.124787	0.0570713	1	1.02077	0.989243	0.823966	0.444059	0.205079	0.0936471	0.0367266	11.3358	-0.13113	0	0.99787	11.5744	-0.143788	0	0.998336	11.2147	-0.128576	0	0.997159	11.4612	-0.14453
O43325	LYRM1	2	5	1	0.965422	0.981983	0.872767	0.609012	0.544065	0.76958	1.14393	1	1.04964	1.07193	0.896129	0.624104	0.715215	0.913468	1.01007	1	0.918694	0.893316	0.775334	0.560752	0.557711	0.713367	0.908631	1	0.998344	1.02238	0.96035	0.741184	0.756147	0.884458	0.819469		-0.575158	0.766646	0.265982		-0.484407	0.815713	0.445986		-0.109113	0.69603	0.52359		-0.529848
O43347	MSI1		11									1	1.01193	0.996607	0.810734	0.440829	0.239143	0.116248	0.061793									1	1.00121	0.969004	0.785164	0.434264	0.226944	0.106263	0.0726737					11.4824	-0.132885	0	0.999227					11.3052	-0.131927
O43353	RIPK2	19	12	1	0.970914	1.02864	0.881203	0.596579	0.534646	0.695639	0.635886	1	0.890786	0.947426	0.853614	0.642	0.600668	0.58674	0.395551	1	1.06003	1.08631	0.927474	0.609731	0.541211	0.673905	0.621634	1	1.01772	1.03197	0.843921	0.697672	0.57343	0.633227	0.387324		-0.982346	0.615688	0.944467	18.5083	-0.0484028	0	0.922206		-1.00128	0.61162	0.943669	18.757	-0.0478566
O43379-4	WDR62	16	5	1	1.02912	1.00617	0.811154	0.463052	0.234264	0.133114	0.0770911	1	1.02608	1.01742	0.796275	0.515316	0.322046	0.190761	0.152249	1	1.00283	1.02075	0.795855	0.457322	0.25245	0.135045	0.0706614	1	0.987718	0.940542	0.820623	0.508998	0.328992	0.194236	0.127302	11.5953	-0.128931	0	0.998951	12.1267	-0.104006	0	0.997797	11.5497	-0.126301	0	0.998472	12.1586	-0.105562
O43390-2	HNRNPR	57	48	1	1.06093	1.11546	0.935732	0.576414	0.407987	0.234361	0.0958354	1	0.87531	0.936289	0.798639	0.567608	0.406643	0.191986	0.0535848	1	1.03872	1.02888	0.865265	0.53684	0.383843	0.213981	0.0803475	1	1.02371	1.0077	0.802847	0.647173	0.389015	0.184426	0.0713625	13.2462	-0.107333	0	0.977564	12.5482	-0.104247	0	0.959022	12.6782	-0.107303	0	0.990558	13.0221	-0.107594
O43390	HNRNPR	1	3	1	1.06092	1.09928	1.02944	0.528251	0.323642	0.0805061	0.0869551	1	1.11288	1.27813	1.01357	0.566441	0.341738	0.137825	0.03577	1	0.984232	0.939489	0.798598	0.521607	0.284713	0.0406382	0	1	1.10849	1.06462	0.982995	0.603704	0.27653	0.100467	0.0423377	12.5524	-0.156768	0.0461335	0.977737	12.9052	-0.13878	0	0.935624	11.8328	-0.137507	0	0.980326	12.8053	-0.15379
O43395	PRPF3	23	24	1	0.950867	0.930742	0.760046	0.408555	0.173035	0.129575	0.117493	1	1.02307	0.971935	0.7648	0.342736	0.13915	0.127013	0.0967357	1	1.04623	1.01619	0.809652	0.416176	0.200357	0.129993	0.129217	1	1.00989	0.989434	0.744537	0.304089	0.15547	0.164077	0.105836	10.9551	-0.136894	0.0316532	0.99296	10.6322	-0.168994	0.0665581	0.998361	11.2027	-0.150725	0.076205	0.997403	10.3659	-0.185476
O43396	TXNL1	38	52	1	0.945961	0.982138	0.844069	0.571605	0.521346	0.81315	0.818253	1	1.02283	1.0266	0.923222	0.64296	0.642178	0.79343	0.656208	1	1.00846	0.999855	0.851512	0.593012	0.559895	0.785195	0.697512	1	1.02064	1.04387	0.946697	0.736348	0.746398	0.756106	0.443602		-1.07159	0.681089	0.658658		-0.855676	0.683694	0.918899		-0.890518	0.658903	0.865938		-0.0382887
O43399-7	TPD52L2	32	29	1	0.963598	1.00472	0.875857	0.596632	0.56406	0.82806	0.995599	1	1.01163	0.998063	0.875644	0.656147	0.658764	0.854603	0.978051	1	0.969808	1.01341	0.864179	0.599879	0.57797	0.778212	0.926036	1	1.01169	1.08728	1.00107	0.786818	0.804107	0.909201	0.894026		-0.631381	0.746088	0.447177		-0.532917	0.786891	0.51755		-0.710253	0.720524	0.612919		-0.352917
O43402	EMC8	10	7	1	0.973002	0.993484	0.834976	0.460946	0.251807	0.13907	0.103994	1	1.01163	0.989959	0.840102	0.503285	0.28523	0.210118	0.119008	1	0.994911	0.985937	0.827156	0.465817	0.222939	0.131971	0.103266	1	0.997773	0.936942	0.820992	0.49572	0.296894	0.208219	0.144524	11.6919	-0.130149	0.025695	0.999184	12.0827	-0.115101	0.0294431	0.999008	11.6174	-0.133278	0.022197	0.999667	12.0138	-0.107493
O43414	ERI3	12	8	1	0.97855	0.968053	0.821766	0.598995	0.567141	0.783027	0.876286	1	0.960441	0.959909	0.874369	0.66894	0.653304	0.737094	0.618846	1	1.00735	0.996543	0.888286	0.649181	0.589887	0.855388	0.777806	1	1.04503	1.01603	0.881791	0.797301	0.816883	0.64828	0.443902		-0.809101	0.706362	0.65854		-0.797484	0.669546	0.938423		-0.751384	0.718066	0.761731		-0.0429443
O43422	PRKRIR	7	7	1	0.965155	1.10535	0.963728	0.593402	0.264013	0.163156	0.171391	1	1.12481	1.13822	0.993942	0.597145	0.265814	0.134102	0.0581024	1	0.959051	0.962961	0.859481	0.537231	0.240165	0.154669	0.129166	1	1.04095	1.07599	0.937832	0.562475	0.292796	0.185716	0.159492	12.5644	-0.176011	0.143271	0.988817	12.7455	-0.15774	0.033186	0.974926	12.1192	-0.12943	0.0395786	0.995626	12.505	-0.146208
O43426	SYNJ1	10	5	1	0.96413	0.934271	0.802476	0.494091	0.437513	0.35328	0.23901	1	0.988249	1.05601	0.894952	0.625774	0.491663	0.173889	0.115349	1	1.06251	1.07605	0.894652	0.585807	0.450399	0.344534	0.24448	1	1.0016	1.09279	1.0163	0.694594	0.494843	0.179582	0.0683506	12.9342	-0.0777212	0.0157404	0.985925	13.612	-0.104264	0	0.979089	13.589	-0.0930336	0.1676	0.983066	14.1681	-0.121822
O43427	FIBP	8	9	1	1.05627	1.06415	0.83355	0.454221	0.198596	0.128657	0.129339	1	1.09045	1.06699	0.8234	0.401072	0.198774	0.125346	0.0771307	1	0.932627	1.01444	0.790548	0.39629	0.183361	0.107023	0.0967534	1	1.05217	1.03276	0.789435	0.466649	0.217369	0.154207	0.101728	11.4796	-0.149399	0.069693	0.992842	11.2343	-0.153478	0.0462947	0.990177	11.0566	-0.149933	0.0394166	0.99551	11.503	-0.126808
O43432-3	EIF4G3	19	21	1	1.02353	0.965654	0.809768	0.471761	0.2801	0.133677	0.0684987	1	1.05044	1.02085	0.82806	0.494882	0.287939	0.137078	0.0771413	1	1.01245	0.988623	0.819977	0.48097	0.292897	0.149682	0.081125	1	1.02681	0.994769	0.840052	0.501657	0.269055	0.134697	0.087612	11.7106	-0.123075	0	0.997084	11.9415	-0.122681	0	0.995858	11.8599	-0.119581	0	0.998421	11.9692	-0.124651
O43447	PPIH	27	24	1	0.988981	0.961278	0.821871	0.596407	0.552808	0.72497	1.0033	1	0.914556	0.908923	0.837408	0.660337	0.653292	0.769911	0.904735	1	0.992191	1.07039	0.894046	0.635811	0.58253	0.755989	0.974137	1	1.00687	1.03955	0.908666	0.788104	0.717949	0.840231	0.824572		-0.775161	0.719371	0.48702		-0.0749569	0.755699	0.515163		-0.693767	0.737117	0.59013		-0.512592
O43462	MBTPS2	1		1	0.903549	0.828975	1.02268	0.521423	0.408884	0.286118	0.445121									1	0.808479	0.867333	0.751293	0.486292	0.243121	0.215817	0.363658									12.1129	-0.3297	0.379195	0.911946					11.2352	-0.121955	0.219098	0.884647
O43464	HTRA2	6	9	1	1.02239	0.977699	0.841694	0.570281	0.583058	0.615369	0.828939	1	1.05605	1.04563	0.970226	0.650207	0.597033	0.621793	0.714906	1	0.989825	0.999896	0.821667	0.584672	0.475764	0.536487	0.726166	1	0.958575	0.990321	0.934808	0.707996	0.600919	0.613877	0.737981		-0.922211	0.649412	0.824931		-0.227816	0.64498	0.955212		-0.301142	0.580569	0.897485		-0.11122
O43474	KLF4	1		1	0.958484	1.37417	1.01178	0.678055	0.362261	0.490673	1.00355									1	1.20445	1.39501	1.06427	0.496007	0.41668	0.529975	0.49906										-0.8815	0.618828	0.50683					11.9736	-1.33972	0.481906	0.796269
O43482	OIP5	2	3	1	1.06841	1.43568	1.23636	0.725875	0.742245	0.817524	1.06398	1	0.719768	0.857403	0.761733	0.558749	0.660019	0.565346	0.523155	1	0.79408	0.911398	0.760015	0.562451	0.603369	0.666228	0.597226	1	1.07021	1.13318	0.859859	0.779482	0.693795	0.8309	0.563953		-0.0772338	0.83913	0.231224			0.104374	0.684689		-0.0826117	0.589565	0.692351		-0.0485415
O43488	AKR7A2	13	13	1	0.95599	0.870235	0.750547	0.536052	0.492324	0.607087	0.288503	1	0.998768	0.958286	0.846148	0.603382	0.557755	0.477502	0.158039	1	1.12925	1.12669	1.02228	0.676582	0.580487	0.633602	0.316813	1	1.02361	1.03186	0.964817	0.687923	0.602674	0.357448	0.0928531	15.1915	-0.0593402	0	0.894813	14.6876	-0.0696789	0	0.938371	17.4194	-0.0635627	0.238818	0.869826	15.0805	-0.0927866
O43490	PROM1	12	10	1	0.989609	1.01181	0.890054	0.626814	0.577413	0.890461	1.16403	1	1.00913	1.07098	0.925701	0.653549	0.644274	0.78208	0.909503	1	1.01627	1.02567	0.936503	0.636348	0.639936	0.865536	1.12806	1	0.994129	1.11527	1.01138	0.744891	0.735884	0.81077	0.764515		-0.493783	0.814679	0.212297		-0.594186	0.747351	0.721227		-0.462524	0.817471	0.289006		-0.194607
O43491	EPB41L2	49	48	1	0.958159	0.968025	0.842821	0.583822	0.442578	0.377894	0.23744	1	1.00484	1.00926	0.869032	0.60943	0.484489	0.339108	0.190194	1	0.98848	0.981261	0.861693	0.60336	0.45476	0.375625	0.217606	1	0.994477	1.01625	0.926213	0.701443	0.515017	0.334094	0.16622	13.7982	-0.0752015	0	0.99152	13.9778	-0.0810055	0	0.991915	13.9754	-0.0769915	0	0.993333	14.7023	-0.08812
O43493	TGOLN2	5	6	1	1.00959	0.912358	0.851691	0.613783	0.616273	0.870827	1.27022	1	1.12936	1.04092	0.899814	0.654343	0.66547	0.83498	1.04215	1	1.0524	1.02993	0.939676	0.627081	0.624348	0.960221	1.38518	1	0.953774	1.11425	0.943055	0.7624	0.732917	0.744729	0.862052		-0.158858	0.84455	0.114218		-1.39414	0.799237	0.469608		-0.25477	0.899208	0.0622894		-0.586848
O43502	RAD51C	11	6	1	0.960158	0.937818	0.845698	0.508118	0.324288	0.162293	0.0724642	1	0.9204	0.909438	0.802556	0.521693	0.296124	0.185626	0.179446	1	1.01274	1.01564	0.880601	0.549931	0.333584	0.184715	0.112622	1	1.03026	1.06799	0.87498	0.596439	0.30752	0.156306	0.196553	12.1686	-0.116568	0	0.992038	12.0433	-0.102127	0	0.983934	12.6126	-0.112638	0	0.998832	12.6413	-0.123875
O43504	LAMTOR5		3									1	0.846142	0.978325	1.01747	0.877916	0.691246	0.898383	0.984971									1	1.34954	1.26157	1.05371	1.00819	0.992221	0.79049	0.914119						-0.264311	0.8582	0.156632						0
O43505	B3GNT1	2		1	0.946039	0.822196	0.743356	0.459518	0.362744	0.515223	0.632497									1	1.09698	1.23118	1.06106	0.667998	0.573331	0.730401	0.870818									18.2497	-0.0951324	0.463117	0.820807						-0.198012	0.709504	0.694567
O43513	MED7	5	4	1	1.0263	1.00145	0.81929	0.526523	0.360471	0.300727	0.205171	1	0.880031	0.835009	0.736435	0.496459	0.433378	0.340745	0.294145	1	0.951757	0.95544	0.752969	0.465186	0.358077	0.288979	0.21053	1	1.05693	0.978795	0.861312	0.638745	0.516368	0.408826	0.308598	12.4763	-0.099355	0.117072	0.997312	12.4117	-0.0735501	0	0.957512	11.8291	-0.0961349	0.0945098	0.994717	15.0516	-0.0656478
O43520	ATP8B1	2		1	0.986203	0.909545	0.742525	0.504359	0.270478	0.0902918	0									1	1.00392	0.959322	0.713634	0.490846	0.233249	0.0934086	0.0539426									11.4314	-0.126822	0	0.977774					11.1811	-0.124831	0	0.989569
O43524	FOXO3	5	4	1	1.10114	1.08911	1.04945	0.709519	0.566961	0.623197	0.824074	1	1.05113	1.10627	0.902895	0.618254	0.459053	0.363485	0.278006	1	0.875795	0.984529	0.788527	0.58149	0.482056	0.537813	0.651381	1	0.934858	0.99286	0.907568	0.598891	0.465451	0.370983	0.271223		-0.739261	0.67141	0.827401	13.8931	-0.092803	0.21167	0.979108		-0.192008	0.560497	0.893028	13.9007	-0.0888714
O43542	XRCC3	7	5	1	1.0605	1.04978	0.839127	0.509766	0.266204	0.198008	0.172246	1	1.07395	1.05203	0.856216	0.514778	0.250917	0.141302	0.106073	1	1.02292	1.05461	0.866514	0.485671	0.268308	0.169383	0.142497	1	1.00268	1.06343	0.834638	0.479773	0.255596	0.17433	0.127943	11.939	-0.128468	0.107589	0.993213	12.0465	-0.129544	0.0192301	0.992779	11.8944	-0.137489	0.0929128	0.996539	11.7749	-0.131104
O43556	SGCE	2		1	1.00867	1.05576	0.857421	0.609574	0.603413	0.679453	0.327357									1	0.969575	0.92202	0.891786	0.581438	0.568588	0.564157	0.280552									18.2517	-0.0494987	0.0173821	0.866053					16.0915	-0.0574059	0	0.916475
O43567	RNF13	3		1	0.860355	0.779962	0.658592	0.383516	0.347049	0.479887	0.70618									1	0.837368	0.791653	0.625681	0.346791	0.362423	0.462045	0.706176									15.1945	-0.133148	0.484142	0.695135					11.7455	-0.152776	0.478763	0.685633
O43570	CA12	1	1	1	0.834521	0.829211	0.90351	0.509631	0.509109	0.60239	0.902771	1	0.983051	0.925619	0.79716	0.676883	0.64779	0.751342	1.08094	1	0.986955	1.07015	0.99852	0.586919	0.592285	0.87436	0.932159	1	1.32311	1.19397	1.19712	0.737748	0.781839	0.832544	0.843828			0.251016	0.36315		-0.174026	0.790749	0.34396		-1.13795	0.746431	0.575075		-0.0932236
O43572	AKAP10	7	3	1	1.03025	1.01116	0.76392	0.381703	0.165965	0.0735449	0.05224	1	1.13906	1.05584	0.813565	0.323269	0.14293	0.169572	0.0904341	1	1.03805	0.996701	0.804157	0.384753	0.155791	0.0801974	0.0737855	1	1.10298	1.04093	0.860764	0.402913	0.194667	0.0938687	0.0734991	10.8931	-0.150188	0	0.998604	10.6894	-0.196806	0.105102	0.982208	11.0341	-0.158337	0.0180105	0.998572	11.351	-0.16375
O43581-2	SYT7	2		1	1.02523	0.872996	0.750823	0.469726	0.331126	0.207953	0.0943052									1	1.06193	1.007	0.834942	0.529195	0.341592	0.229278	0.114121									11.5168	-0.102314	0	0.983918					12.4408	-0.104001	0	0.99411
O43583	DENR	12	13	1	0.931017	1.00038	0.861167	0.590574	0.526283	0.770455	1.02438	1	1.08133	0.83122	0.822141	0.619655	0.614439	0.731525	0.868084	1	1.01601	0.998849	0.848712	0.595577	0.536512	0.757389	0.98263	1	0.988132	1.04374	0.900312	0.692127	0.675444	0.94382	0.899826		-0.683846	0.727924	0.406605		-0.0888623	0.721808	0.698246		-0.720972	0.718027	0.540913		-0.504101
O43592	XPOT	26	20	1	1.01336	0.982072	0.793223	0.454882	0.208264	0.0966887	0.0632483	1	0.932806	0.953573	0.78136	0.466343	0.259195	0.141208	0.121417	1	1.03317	0.987481	0.813198	0.476906	0.217289	0.109458	0.0634343	1	0.986533	0.956014	0.770671	0.436316	0.233281	0.159966	0.127963	11.3905	-0.136384	0	0.99855	11.5327	-0.116974	0	0.993836	11.6018	-0.134762	0	0.998047	11.2744	-0.122972
O43598	DNPH1		16									1	0.878165	0.930643	0.869151	0.633429	0.559362	0.616845	0.543025									1	0.952164	1.02599	0.871157	0.665982	0.583019	0.61076	0.362287						-0.106276	0.564215	0.903885					17.9775	-0.0504413
O43615	TIMM44	36	29	1	0.993742	1.01859	0.850484	0.565997	0.276572	0.111247	0.0722018	1	1.0425	0.999544	0.879598	0.542208	0.246988	0.0730357	0.053441	1	0.974572	0.986513	0.848477	0.549438	0.274715	0.115916	0.0783202	1	0.996819	0.992987	0.900464	0.540825	0.225742	0.0898309	0.0513583	12.3299	-0.129555	0	0.996424	12.2056	-0.145154	0	0.9964	12.23	-0.127683	0	0.997052	12.2231	-0.149609
O43617	TRAPPC3	13	10	1	1.01023	1.05135	0.898677	0.622431	0.572277	0.723377	0.635243	1	1.02227	0.988026	0.872994	0.614376	0.643416	0.692294	0.452956	1	1.0285	1.05323	0.923068	0.608934	0.596268	0.731565	0.554659	1	1.01789	0.973859	0.888098	0.764352	0.724756	0.651366	0.383618		-0.963861	0.638332	0.946304		-0.0975744	0.575423	0.900109		-1.0122	0.622856	0.932905	20.2737	-0.0453735
O43633	CHMP2A	19	14	1	0.972513	0.943095	0.837033	0.601433	0.593938	0.892596	0.958273	1	0.988861	0.921372	0.86387	0.651837	0.6564	0.865867	0.798809	1	0.985519	0.991709	0.884812	0.653556	0.61832	0.868544	0.870278	1	1.01823	1.0551	0.954361	0.734959	0.808336	0.946502	0.747823		-0.0899104	0.772142	0.390003		-0.0628126	0.749146	0.664649		-0.607089	0.752675	0.641398		-0.499222
O43639	NCK2	17	7	1	0.98337	1.24115	1.02776	0.617402	0.718626	0.866892	0.793639	1	1.0272	1.06523	0.858662	0.650414	0.616694	0.630047	0.242926	1	0.872885	0.93936	0.793159	0.57312	0.590501	0.774127	0.50275	1	0.98068	1.03986	0.967737	0.790097	0.654204	0.512819	0.145267		-0.14641	0.748678	0.650643	16.9651	-0.0558056	0	0.884819		-1.20352	0.610125	0.742971	16.592	-0.0851107
O43657	TSPAN6	7	6	1	0.948541	0.970954	0.829352	0.617751	0.633808	1.0322	1.57646	1	0.546838	0.761213	0.708439	0.606955	0.724048	0.684896	0.843182	1	0.984202	1.06203	0.944616	0.668351	0.682401	1.03136	1.4989	1	0.833742	1.00179	0.645278	0.760128	0.586791	1.03167	0.905157		-0.151657	0.937913	0.00161613			0.695468	0.585066						-1.23839
O43660	PLRG1	11	10	1	0.975709	0.884633	0.66204	0.365274	0.234345	0.186455	0.180328	1	0.936149	0.882616	0.745091	0.391262	0.26139	0.183501	0.13448	1	0.984357	0.955172	0.727295	0.402903	0.259736	0.185062	0.185487	1	1.00159	0.922964	0.832713	0.554035	0.333188	0.187981	0.169686	10.3207	-0.110044	0.0170657	0.994349	10.9816	-0.110261	0	0.985805	10.8879	-0.126763	0.110534	0.998608	12.4685	-0.101705
O43663	PRC1	15	10	1	1.008	0.974262	0.681714	0.320816	0.116251	0.0575729	0.0755795	1	1.0633	0.946021	0.694302	0.329231	0.13662	0.0787012	0.0917249	1	0.935751	0.909664	0.690981	0.313682	0.117437	0.0692736	0.0737178	1	0.981492	0.871574	0.736748	0.311991	0.143814	0.0947322	0.0874933	10.2331	-0.1565	0	0.998369	10.3168	-0.150034	0.010537	0.994779	10.2139	-0.15354	0	0.991052	10.4215	-0.157424
O43665-3	RGS10	13	12	1	0.982444	0.986101	0.871672	0.577032	0.572658	0.847062	0.911374	1	0.966416	0.975997	0.880597	0.660785	0.605876	0.790477	0.863959	1	1.00832	1.04475	0.960675	0.623342	0.591943	0.800735	0.933009	1	0.990842	1.07713	0.907335	0.702525	0.751273	0.879288	0.727423		-0.73209	0.727032	0.554844		-0.782936	0.730274	0.713056		-0.646511	0.737257	0.645885		-0.598107
O43670-2	ZNF207	1	1	1	0.80217	1.06978	0.72421	0.568928	0.580405	0.881408	1.06234	1	0.656763	1.00346	0.934846	0.649038	0.582431	0.945422	0.818611	1	0.961787	1.06002	0.902134	0.642308	0.564229	0.728744	1.01418	1	1.1001	1.14323	1.08071	0.730566	0.694085	0.696983	0.638077						-0.668593	0.748875	0.0395261		-0.734445	0.737364	0.51224		-0.287028
O43670-4	ZNF207	18	16	1	0.925395	1.05192	0.876835	0.58715	0.557046	0.775546	1.08833	1	0.944291	0.995268	0.909222	0.689622	0.686228	0.815993	1.14991	1	1.04772	1.00043	0.919797	0.636087	0.583593	0.745952	1.08279	1	1.01605	1.01184	0.913812	0.830495	0.716923	0.914794	0.979083		-0.616118	0.752019	0.346766		-0.404913	0.835437	0.191933		-0.632609	0.762105	0.422153		-0.29175
O43674	NDUFB5	9	8	1	0.976211	1.0339	0.838883	0.530898	0.386322	0.260133	0.0605081	1	0.976305	0.96227	0.849965	0.539351	0.384335	0.196887	0.0377949	1	0.997554	0.984681	0.851408	0.552599	0.400662	0.270492	0.0742654	1	0.984004	1.04496	0.837183	0.595618	0.349348	0.171316	0.0787497	12.6238	-0.102977	0	0.983935	12.5545	-0.11118	0	0.985136	12.8516	-0.0998417	0	0.986968	12.7164	-0.113243
O43676	NDUFB3	5	8	1	0.965973	1.0333	0.856747	0.617512	0.493737	0.424606	0.213126	1	0.962977	0.976251	0.873586	0.656645	0.559125	0.407165	0.169058	1	0.977304	0.990891	0.841687	0.583204	0.520593	0.408307	0.205459	1	1.01676	1.08354	0.980434	0.76727	0.576015	0.355022	0.168276	14.4589	-0.072843	0	0.97839	14.8263	-0.0755679	0	0.967895	14.2305	-0.0723495	0	0.97647	15.4836	-0.0924276
O43678	NDUFA2	8	5	1	0.930638	0.876171	0.843487	0.481884	0.298426	0.45623	0.887392	1	0.853294	0.980649	0.849308	0.493947	0.420886	0.497934	0.514081	1	1.108	1.03758	0.883864	0.590457	0.416461	0.513069	0.797331	1	0.991184	1.09171	0.792317	0.578245	0.480724	0.535914	0.49802		-1.38888	0.530983	0.576753	11.4058	-0.256831	0.479	0.93432		-0.24896	0.578402	0.805638		-0.131322
O43681	ASNA1	21	17	1	0.988634	0.936271	0.808806	0.606589	0.480478	0.405011	0.17618	1	0.978763	0.984584	0.843341	0.636595	0.50387	0.376563	0.142238	1	1.00629	1.02433	0.879476	0.640571	0.517506	0.418195	0.185585	1	1.02024	1.01786	0.920812	0.68875	0.495296	0.307984	0.140639	13.8555	-0.0743168	0	0.974125	14.1313	-0.0801345	0	0.975165	14.6505	-0.075332	0	0.97831	14.3975	-0.0929423
O43683	BUB1	14	17	1	1.01195	0.986437	0.8174	0.460066	0.217869	0.0759067	0.0393161	1	1.12485	1.08579	0.795564	0.454806	0.267992	0.173946	0.144829	1	0.904459	0.967626	0.746266	0.42413	0.189295	0.084568	0.0454192	1	1.01435	1.03988	0.817673	0.485522	0.268903	0.156385	0.112642	11.5177	-0.142874	0	0.99773	11.5197	-0.12926	0.0840194	0.979871	10.9954	-0.139108	0	0.989163	11.8392	-0.120596
O43684	BUB3	26	31	1	1.00464	0.994701	0.845497	0.587915	0.536468	0.672054	0.606198	1	0.992187	1.00826	0.863386	0.613621	0.582347	0.651635	0.445509	1	0.977177	0.957717	0.836499	0.584596	0.546759	0.640046	0.523777	1	1.00331	1.0614	0.940587	0.725834	0.640783	0.63415	0.37437		-1.06182	0.600659	0.967072		-0.0938989	0.533946	0.940069		-0.178598	0.569993	0.966509	18.9547	-0.0495953
O43688-2	PPAP2C	3	2	1	1.00957	0.950149	0.904104	0.574027	0.598125	0.867915	1.2486	1	0.95116	0.978813	0.875618	0.598007	0.637699	1.02176	1.11137	1	1.00722	1.02466	0.931293	0.611513	0.656843	0.921043	1.26851	1	0.985353	1.1996	1.00038	0.785133	0.843158	0.989486	1.05332		-0.0743495	0.836641	0.125835		-0.0875241	0.848121	0.123438		-0.309847	0.864478	0.116886		-0.168865
O43707	ACTN4	169	150	1	0.990995	1.00098	0.875021	0.63365	0.6163	0.873178	1.16816	1	1.00783	1.00072	0.870945	0.660364	0.707108	0.965291	1.0978	1	0.985148	1.0096	0.873983	0.637597	0.622121	0.851746	1.06476	1	1.01215	1.04395	0.956231	0.794857	0.823699	1.00569	1.02271		-0.458306	0.822823	0.208059		-0.319342	0.857641	0.225974		-0.51101	0.794057	0.353206		-0.497486
O43709	WBSCR22	8	12	1	0.97596	1.0476	0.857334	0.533824	0.356683	0.368393	0.342782	1	0.988171	1.02632	0.83334	0.548695	0.424305	0.367254	0.25625	1	0.948563	0.971183	0.809048	0.503646	0.36815	0.336861	0.267052	1	1.05483	1.03245	0.874937	0.558201	0.403814	0.259145	0.190544	12.2539	-0.132041	0.325624	0.993459	13.0744	-0.0923284	0.194666	0.993278	12.176	-0.108829	0.233573	0.994086	13.0199	-0.0979927
O43715	TRIAP1	1	2	1	1.29936	1.60635	1.39289	1.19411	1.2957	1.88932	3.13065	1	1.28824	1.2472	1.09805	0.883439	1.00714	1.30303	1.58656	1	1.18265	1.37079	1.27017	0.971951	1.01062	1.87035	2.76102	1	1.15463	1.27795	1.00554	1.00183	1.06113	1.00581	1.42158			1.5	0.0656446		0	1.5	0.505156		0.162897	1.5	0.127462		0.239744
O43716	GATC	7	3	1	1.07295	1.1221	1.03276	0.65668	0.615303	0.803341	0.866185	1	1.16809	1.34519	1.23304	0.910597	0.851256	0.990082	1.05713	1	1.07102	1.11727	0.95532	0.692881	0.629043	0.779058	0.814214	1	1.19233	1.2224	1.12789	0.987931	0.952645	0.878786	1.00779		-0.165915	0.734906	0.746514						-0.714619	0.728799	0.823108		-0.0240068
O43719	HTATSF1	46	57	1	1.01467	1.04551	0.942362	0.640352	0.64407	0.748688	0.550077	1	1.05346	1.07789	0.959192	0.698158	0.72632	0.776673	0.413209	1	0.996092	1.01294	0.917379	0.652143	0.631922	0.727525	0.449935	1	1.04937	1.08112	1.04777	0.874884	0.801499	0.781378	0.425969		-0.84873	0.645797	0.920394		-0.039557	0	0.808406		-0.0883084	0.57869	0.877567	20.9297	-0.0609036
O43731-2	KDELR3		1									1	0.868587	0.853102	0.710363	0.375727	0.110536	0.0387006	0									1	0.956226	0.993566	0.72343	0.315443	0.130484	0.0436681	0					10.4567	-0.158336	0	0.96307					10.4159	-0.169757
O43731	KDELR3	1		1	1.15034	1.29099	1.05389	0.59518	0.547264	0.382712	0.288137									1	1.1071	1.14836	0.875421	0.575577	0.470984	0.412889	0.182227									14.0832	-0.110962	0.314469	0.864602					14.0455	-0.0793222	0.0130168	0.940385
O43734	TRAF3IP2	4	1	1	0.958224	1.0304	0.861075	0.508247	0.322617	0.245339	0.226624	1	1.20042	1.21156	0.979417	0.595204	0.395225	0.362249	0.43727	1	1.01674	1.03823	0.889218	0.54869	0.328732	0.228489	0.214271	1	1.06549	1.09051	1.01142	0.554548	0.403022	0.241386	0.359936	12.085	-0.128638	0.186426	0.996679	12.0903	-1.48145	0.398248	0.904664	12.4551	-0.125824	0.159682	0.997745	12.443	-0.198844
O43739	CYTH3		1									1	1.17195	1.01762	0.972902	0.635907	0.438325	0.290093	0.220439									1	1.18361	1.03782	0.92022	0.645009	0.380274	0.280085	0.156306					13.7425	-0.107385	0.154188	0.965459					13.5702	-0.101602
O43741	PRKAB2	6	1	1	1.00533	1.15434	0.93389	0.628035	0.457752	0.376553	0.326507	1	1.01813	1.1345	0.885265	0.539337	0.32417	0.313153	0.0853588	1	0.949135	1.08723	0.834242	0.569194	0.425269	0.285426	0.232834	1	0.957115	1.00305	1.01356	0.632159	0.257408	0.174474	0.154807	13.8102	-0.106973	0.305322	0.966554	12.7101	-0.108222	0.0357947	0.967835	13.1235	-0.0920728	0.102944	0.983131	12.7115	-0.201389
O43747-2	AP1G1	40	44	1	0.999333	0.918889	0.812484	0.610787	0.549586	0.603952	0.062459	1	0.776024	0.785948	0.722924	0.621634	0.595665	0.394759	0.0534754	1	1.04373	1.03339	0.903688	0.667414	0.601406	0.607665	0.0828268	1	0.943413	0.922332	0.744986	0.659945	0.548634	0.408625	0.0607992	14.7474	-0.0674298	0	0.823379	13.2793	-0.071923	0	0.711016	15.8485	-0.070896	0	0.859337	13.9146	-0.0768511
O43752	STX6	6	12	1	1.01949	1.06334	0.839952	0.622822	0.56153	0.749566	0.729874	1	1.06233	1.0498	0.907776	0.665337	0.619618	0.756182	0.75939	1	0.984113	1.01109	0.867567	0.588935	0.52628	0.636661	0.715711	1	1.00227	0.996089	0.956309	0.725539	0.699345	0.735226	0.731082		-0.911843	0.665948	0.887288		-0.847121	0.700132	0.903659		-1.03176	0.616897	0.929178		-0.171516
O43759-2	SYNGR1	3		1	1.23271	1.21842	1.10785	0.684666	0.617809	0.908708	0.906882									1	1.10187	1.08367	0.886683	0.628593	0.554932	0.650701	0.723633										-0.107214	0.779202	0.48538						-0.948021	0.639465	0.903492
O43759	SYNGR1		1									1	0.964673	0.933021	0.955287	0.703999	0.682176	0.763642	0.972947									1	1.08954	1.13877	1.03423	0.984587	0.867447	0.803256	1.00311						-0.661775	0.780691	0.519181						-0.268066
O43760	SYNGR2	5	5	1	1.1136	0.986706	1.02994	0.66634	0.824179	1.45242	1.85444	1	1.02357	1.01447	0.911959	0.736718	0.842776	1.11024	1.46994	1	1.15412	1.10917	0.87126	0.822405	0.812703	1.43805	1.96286	1	1.00559	0.985877	0.941599	0.857118	0.991571	1.01527	1.43702		0.877319	1.5	0.713399			1.01567	0.000642975		0	1.5	0.687686		0.220243
O43765	SGTA	25	33	1	0.962304	0.942767	0.832211	0.605634	0.608475	0.990162	1.40767	1	0.9548	0.994432	0.891199	0.676345	0.748906	0.988166	1.36584	1	1.00932	0.976658	0.874482	0.655809	0.665705	1.0201	1.37198	1	0.998677	1.06626	0.931069	0.823552	0.833095	1.08949	1.19052		-0.280282	0.88883	0.0266588		-0.171406	0.934092	0.0123352		-0.207773	0.917616	0.0325385		-0.146167
O43766	LIAS	6	4	1	0.942526	0.944665	0.83816	0.541078	0.474549	0.565202	0.710661	1	0.833349	0.990079	0.864826	0.608626	0.545993	0.58933	0.591765	1	0.997918	0.959909	0.86299	0.548193	0.441428	0.579053	0.656244	1	0.92367	1.03083	0.796862	0.634412	0.559843	0.626829	0.526152		-1.20553	0.572872	0.879873		-0.149265	0.576023	0.883555		-1.18474	0.55623	0.928405		-0.0999148
O43768-3	ENSA	18	14	1	0.948096	0.949823	0.865238	0.629575	0.639945	1.04309	1.54659	1	0.961798	1.04852	0.945026	0.724229	0.817343	1.09576	1.52298	1	1.00891	1.02592	0.93475	0.700156	0.705643	1.10996	1.57424	1	1.05195	1.01148	0.979305	0.938792	0.843463	1.27699	1.35086		-0.12604	0.944887	-0.000213089		0.0893945	1.02564	0.00572288		0	1.5	0.642279		0.644912
O43772	SLC25A20	7	7	1	0.935212	0.922866	0.797246	0.441289	0.239168	0.122539	0.030406	1	0.899137	0.946896	0.785006	0.464237	0.239994	0.0991021	0.0251585	1	1.02303	1.00331	0.790301	0.497529	0.258739	0.115932	0.0321482	1	1.00651	1.01074	0.752367	0.493078	0.215444	0.105631	0.043133	11.3932	-0.132502	0	0.989164	11.4332	-0.133703	0	0.984209	11.6858	-0.128935	0	0.994228	11.3975	-0.130723
O43776	NARS	45	43	1	1.00726	0.98009	0.862823	0.585875	0.392792	0.189133	0.155888	1	0.932511	0.968421	0.852782	0.582682	0.391023	0.200888	0.117002	1	1.02492	1.02002	0.875284	0.590543	0.399443	0.183936	0.131356	1	1.00144	1.00538	0.893904	0.636722	0.314792	0.192208	0.0886216	12.9716	-0.10135	0	0.996601	12.8912	-0.103214	0	0.989972	13.0397	-0.10518	0	0.994988	13.0371	-0.119556
O43795	MYO1B	42	40	1	1.10984	1.1149	0.835711	0.389114	0.150031	0.084116	0.101475	1	1.11146	1.12465	0.824982	0.385124	0.142135	0.095155	0.0704841	1	1.06267	1.06181	0.76677	0.37313	0.150087	0.0899824	0.0919655	1	1.1439	1.0788	0.792092	0.363612	0.159044	0.0970632	0.0722162	11.1208	-0.174957	0.0555964	0.982081	11.0877	-0.17079	0.0373923	0.981088	10.8205	-0.159333	0.0368736	0.992971	10.8977	-0.164547
O43805	SSNA1	4	1	1	1.00278	1.11667	1.08682	0.710288	0.697057	1.09237	1.67077	1	1.06603	0.923808	0.958228	0.690095	0.597891	0.930339	1.18479	1	0.917299	1.06393	0.901451	0.670185	0.668724	0.951625	1.36759	1	1.20247	1.23326	0.989857	0.810032	0.870498	1.05765	1.38893		0.271161	1.06233	0.00874269		-0.0534637	0.870172	0.136861						0.475061
O43808	SLC25A17	1	2	1	1.00044	0.8323	0.727097	0.433094	0.209071	0.0930327	0.0194036	1	0.886683	0.998466	0.780601	0.425092	0.214437	0.202069	0.135014	1	1.09539	1.02992	0.822321	0.491159	0.255914	0.122286	0.0358066	1	1.0177	1.07509	0.718634	0.48079	0.255998	0.135097	0.134619	10.852	-0.131329	0	0.973596	11.1663	-0.138215	0.0987574	0.985211	11.7992	-0.132043	0	0.989558	11.3842	-0.11514
O43809	NUDT21	20	22	1	0.952611	0.865639	0.727308	0.452016	0.336222	0.439361	0.639867	1	0.98152	0.920007	0.756967	0.490067	0.43705	0.527043	0.653199	1	1.05317	0.951508	0.793528	0.480377	0.388377	0.48405	0.653896	1	0.993007	0.921634	0.808912	0.575246	0.515135	0.576046	0.541361	13.2606	-0.107408	0.442899	0.836881		-1.48372	0.52684	0.911458		-1.66991	0.501675	0.911793		-0.144256
O43813	LANCL1	18	18	1	0.946559	1.03481	0.882432	0.606511	0.573928	0.821024	0.973294	1	0.77164	0.892432	0.828726	0.625247	0.604626	0.66217	0.706993	1	1.00814	1.03431	0.93415	0.625054	0.588343	0.793987	0.94526	1	0.906164	1.04793	0.793527	0.64516	0.616125	0.744356	0.608021		-0.694382	0.743689	0.494463		-0.0596285	0.612186	0.48546		-0.829698	0.738162	0.621171		-0.884801
O43815	STRN	20	19	1	0.970275	0.87582	0.768205	0.529033	0.396092	0.279872	0.0892808	1	1.00441	0.988908	0.863574	0.630489	0.46272	0.215681	0.0931477	1	1.11388	1.09192	0.967064	0.631089	0.457483	0.304295	0.120478	1	0.984104	1.04987	0.897015	0.668516	0.445721	0.223755	0.0832102	12.2299	-0.0918239	0	0.96983	13.4809	-0.101539	0	0.9859	13.9927	-0.0975707	0	0.969304	13.7434	-0.107907
O43818	RRP9	7	6	1	1.00911	0.926536	0.760997	0.417759	0.305265	0.306284	0.309716	1	0.943623	0.931206	0.693646	0.457853	0.375041	0.308601	0.259112	1	0.984336	0.930029	0.763703	0.42896	0.311216	0.303033	0.282026	1	0.988675	0.916742	0.790565	0.606978	0.364256	0.290048	0.24473	10.8978	-0.155418	0.285476	0.992627	11.5433	-0.0920772	0.12968	0.994259	11.1049	-0.138937	0.259906	0.993943	12.9838	-0.0815991
O43819	SCO2	5	8	1	1.01731	1.04856	0.839563	0.431444	0.237581	0.105206	0.0934006	1	1.01011	0.960384	0.791439	0.445672	0.212527	0.105221	0.0769593	1	1.04465	0.985659	0.864915	0.426657	0.229681	0.117064	0.0791106	1	1.02233	0.990892	0.806991	0.441387	0.221607	0.104381	0.0677966	11.5108	-0.142851	0.0324452	0.996663	11.3516	-0.13326	0	0.998506	11.5449	-0.149128	0.0396165	0.997541	11.4258	-0.135598
O43822-4	C21orf2	1		1	0.996686	1.11949	0.936743	0.491885	0.283268	0.127688	0.11028									1	0.981587	1.03111	0.906719	0.50291	0.232502	0.138071	0.116251									12.1255	-0.152287	0.0777153	0.986014					12.008	-0.154292	0.0761436	0.998789
O43823	AKAP8	13	10	1	1	0.942218	0.755677	0.429317	0.234815	0.15199	0.130219	1	0.99416	1.01102	0.799635	0.461576	0.288897	0.19082	0.167209	1	1.07051	1.02204	0.834036	0.450263	0.244452	0.176962	0.148237	1	1.05107	1.00828	0.808327	0.489114	0.290609	0.198405	0.162208	11.1849	-0.118997	0.0110494	0.998203	11.6144	-0.122593	0.0953929	0.999339	11.5274	-0.141783	0.106719	0.995045	11.8434	-0.116682
O43824	GTPBP6	7	12	1	1.06142	0.939532	0.741379	0.409499	0.179315	0.121263	0.117344	1	0.8843	0.995698	0.770892	0.436375	0.229828	0.175598	0.128104	1	0.999502	0.982543	0.747598	0.410716	0.193308	0.139429	0.106057	1	1.01307	1.11401	0.796247	0.437637	0.241335	0.180662	0.135621	10.903	-0.13088	0.0113788	0.99347	11.26	-0.127901	0.0575954	0.986002	10.982	-0.132583	0.0248433	0.999357	11.3514	-0.139089
O43826-2	SLC37A4	4	3	1	0.841016	0.789757	0.602945	0.391296	0.175879	0.0932245	0.0275665	1	1.0433	0.920066	0.737939	0.429268	0.188031	0.119056	0.0579475	1	1.05494	0.931663	0.769757	0.44964	0.218404	0.108072	0	1	1.02658	0.979784	0.852207	0.377962	0.239797	0.114422	0.0539202	9.54273	-0.125573	0	0.941515	10.9617	-0.131434	0	0.992924	11.2515	-0.136707	0	0.988827	11.3078	-0.152015
O43829	ZBTB14	1		1	0.947198	1.03529	0.883974	0.483086	0.287312	0.356246	0.251696									1	0.913719	0.993372	0.805105	0.495273	0.348901	0.287704	0.26364									11.7427	-0.159881	0.274961	0.986966					11.9441	-0.115974	0.217537	0.989763
O43837	IDH3B	35	26	1	0.992215	0.941736	0.774533	0.480787	0.284035	0.287877	0.247891	1	0.955131	0.928435	0.75927	0.46106	0.311114	0.277719	0.203091	1	1.00434	0.975904	0.787202	0.476123	0.292106	0.283753	0.239794	1	0.973657	0.969258	0.763897	0.459295	0.299815	0.241909	0.155796	11.5543	-0.117864	0.191184	0.994381	11.6244	-0.100968	0.0905072	0.993283	11.5662	-0.124025	0.200743	0.998208	11.6105	-0.105984
O43847-2	NRD1	45	35	1	0.992217	0.997754	0.887497	0.631036	0.573293	0.352744	0.0923298	1	1.02345	1.02397	0.881226	0.662932	0.602793	0.252571	0.0511132	1	1.005	1.01354	0.90138	0.636984	0.58903	0.332252	0.101113	1	1.00895	1.03186	0.920758	0.773742	0.557616	0.205668	0.0723652	14.4094	-0.0859295	0	0.955871	14.415	-0.0999836	0	0.949048	14.5189	-0.0873949	0	0.958453	14.8187	-0.122201
O43852-3	CALU	39	44	1	0.958963	1.00314	0.848897	0.565163	0.441499	0.503611	0.619915	1	1.12981	1.09004	0.962049	0.635671	0.515672	0.57636	0.551243	1	0.972395	0.98533	0.847449	0.559475	0.441671	0.502554	0.550409	1	1.02867	0.988397	0.961331	0.706257	0.49397	0.483201	0.395209		-0.179078	0.525484	0.951256		-0.147719	0.545855	0.942732		-0.158133	0.499672	0.980468	15.2547	-0.101483
O43852-4	CALU	5	4	1	0.911777	0.879128	0.799457	0.535948	0.512695	0.718264	0.951749	1	1.06866	1.01406	0.859051	0.656336	0.589665	0.789615	0.881782	1	0.967926	1.01096	0.847087	0.607347	0.561771	0.759931	0.874739	1	0.96646	0.985306	0.981161	0.714819	0.644416	0.717294	0.741793		-0.103089	0.69485	0.409579		-0.746236	0.729349	0.726208		-0.772332	0.700947	0.699292		-0.158975
O43861	ATP9B	6	1	1	0.977511	0.975526	0.792529	0.400674	0.277843	0.210296	0.323277	1	1.07871	1.30422	0.878521	0.290775	0.128366	0.055663	0	1	1.06431	1.02386	0.751476	0.434368	0.308907	0.258878	0.331799	1	1.11203	0.844526	0.853231	0.259747	0	0	0.000638622	10.8388	-0.175256	0.254986	0.990023	10.8949	-0.218729	0.0226443	0.947393	10.9395	-0.152262	0.278287	0.989677	10.6359	-0.249828
O43865	AHCYL1	13	15	1	0.983908	0.94675	0.821537	0.601336	0.507839	0.405893	0.104481	1	0.97238	1.03606	0.933146	0.643495	0.51104	0.287793	0.0512129	1	0.992496	0.984418	0.842044	0.610518	0.506497	0.395855	0.103995	1	1.00622	1.0202	0.928151	0.690237	0.470838	0.182445	0.0668772	13.8368	-0.0789811	0	0.950494	14.0687	-0.10169	0	0.971868	13.9615	-0.0812935	0	0.959966	13.9371	-0.117501
O43896	KIF1C	19	21	1	1.01895	0.935546	0.763851	0.495487	0.281511	0.12081	0.0881982	1	1.0253	1.00526	0.854497	0.486604	0.236929	0.0803481	0.0560412	1	1.02409	1.04331	0.822786	0.518251	0.285959	0.151392	0.102962	1	1.02459	0.979625	0.830023	0.457586	0.193219	0.0858303	0.0564935	11.5826	-0.117107	0	0.992899	11.8289	-0.141772	0	0.998071	12.0658	-0.118004	0	0.996538	11.5213	-0.145252
O43900	PRICKLE3		3									1	1.03591	1.08209	0.84942	0.457712	0.32124	0.253643	0.120721									1	1.02892	0.901718	0.776508	0.439761	0.316723	0.162039	0.142034					11.9079	-0.124425	0.111177	0.985415					11.5057	-0.106795
O43909	EXTL3	7	9	1	1.03327	1.082	0.880299	0.483773	0.287296	0.185329	0.0615376	1	0.882466	0.946093	0.805036	0.457749	0.215137	0.136218	0.0802839	1	1.02083	1.02836	0.768112	0.459694	0.2481	0.134767	0.0745793	1	1.04729	1.01942	0.810515	0.480654	0.249417	0.128342	0.0750815	12.127	-0.125055	0.00498414	0.989688	11.4872	-0.129175	0	0.984426	11.4346	-0.1243	0	0.99705	11.7041	-0.127217
O43913	ORC5	10	11	1	1.01427	0.92333	0.715779	0.335156	0.149107	0.101117	0.0810146	1	0.936323	0.922183	0.754798	0.350094	0.164634	0.140418	0.119491	1	1.06519	1.03471	0.808063	0.365985	0.154117	0.12271	0.0976996	1	1.01166	0.936143	0.696709	0.360583	0.178856	0.152209	0.132439	10.4502	-0.145281	0.00679676	0.996481	10.6301	-0.158499	0.0788556	0.991077	10.9097	-0.172075	0.0714469	0.995448	10.4512	-0.137381
O43920	NDUFS5	7	8	1	1.01415	1.00753	0.82955	0.477032	0.267923	0.17618	0.126576	1	0.864993	0.997056	0.832625	0.480827	0.308758	0.178953	0.125875	1	1.03194	0.959488	0.815951	0.499376	0.294084	0.171136	0.143289	1	1.00892	1.00491	0.857881	0.551023	0.297896	0.174821	0.150565	11.794	-0.124772	0.0523277	0.999604	11.987	-0.114567	0.022015	0.979639	11.9807	-0.109998	0.00198891	0.997805	12.3842	-0.116657
O43924	PDE6D	5	4	1	1.03025	1.00424	0.869129	0.613918	0.649251	0.95052	1.34332	1	1.0398	1.03723	0.883609	0.618948	0.791515	0.960653	1.32301	1	0.981932	1.00669	0.817799	0.606886	0.606827	0.88839	1.18155	1	1.1224	1.04928	1.03203	0.744585	0.866255	1.04079	1.20211		-0.554864	0.885228	0.0788517		-0.296023	0.915546	0.0701058		-0.449509	0.820289	0.203724		-0.0138922
O43929	ORC4	14	11	1	1.0464	1.01032	0.76872	0.388768	0.156612	0.110618	0.102195	1	1.08891	1.02619	0.815468	0.433263	0.207124	0.169471	0.133722	1	1.02352	0.992435	0.779697	0.368017	0.143986	0.0880692	0.0841365	1	1.02696	0.955761	0.790312	0.39721	0.194418	0.156579	0.136652	10.8891	-0.152707	0.0430856	0.997009	11.3119	-0.147305	0.0942926	0.992142	10.8397	-0.16054	0.0300842	0.998954	11.0091	-0.151086
O43933	PEX1	14	10	1	0.99118	0.969353	0.73388	0.366169	0.12988	0.0598914	0.0710287	1	1.05714	0.990576	0.797325	0.413415	0.182363	0.113701	0.115048	1	1.04399	1.00307	0.783233	0.366899	0.139086	0.080712	0.0528077	1	1.03017	0.950752	0.764265	0.381489	0.206214	0.130144	0.0881324	10.6348	-0.153248	0	0.997856	11.1376	-0.148472	0.0500995	0.996492	10.8808	-0.158452	0.00224677	0.998311	10.9463	-0.135909
O60216	RAD21	27	18	1	0.992659	1.01717	0.846181	0.459524	0.155467	0.0426358	0.0382099	1	0.831336	0.871796	0.764357	0.462404	0.162078	0.0841845	0.0693311	1	0.98494	1.0061	0.859895	0.445241	0.157035	0.0592222	0.0600518	1	0.964639	0.974739	0.791185	0.499016	0.179049	0.100815	0.0709291	11.5241	-0.163689	0	0.997635	11.1518	-0.137297	0	0.95315	11.5142	-0.161616	0	0.998952	11.5272	-0.136436
O60220	TIMM8A	6	5	1	1.31254	1.68332	1.42867	1.07081	0.951969	1.5847	2.34548	1	1.03005	1.42309	1.37825	1.11189	1.30026	1.43054	1.70001	1	1.15381	1.35292	1.36112	0.815194	0.89795	1.45157	2.101	1	1.30797	1.52572	1.25836	1.47136	1.55223	1.31418	2.49975			1.5	0.159721		1.57742	1.39067	0.534978		0	1.5	0.415199
O60229	KALRN		2									1	1.19531	1.135	1.03284	0.645992	0.483551	0.310499	0.346342									1	1.16783	0.976733	1.0035	0.594511	0.408111	0.340352	0.15781					13.6982	-0.132492	0.324504	0.927759					13.4514	-0.113265
O60231	DHX16	33	31	1	0.990001	0.945074	0.819711	0.488835	0.242896	0.102378	0.0667587	1	1.01749	0.996759	0.853833	0.507827	0.220978	0.0862663	0.0593452	1	1.01765	1.0056	0.864148	0.525494	0.265124	0.118292	0.087501	1	0.99916	1.02635	0.888963	0.544817	0.247627	0.103762	0.0682921	11.7187	-0.131559	0	0.996148	11.901	-0.142407	0	0.998426	12.1498	-0.129573	0	0.999044	12.2702	-0.139888
O60232	SSSCA1	19		1	1.05379	1.20131	1.14318	0.740862	0.701801	0.982174	1.43498									1	1.12102	1.2049	1.09302	0.745414	0.697129	0.952086	1.26243										0	1.49314	0.450858						-0.0322843	0.919451	0.0832411
O60234	GMFG	1	1	1	0.980056	1.0382	1.0335	0.587463	0.651435	0.978392	1.20505	1	1.21152	1.31791	0.969315	0.681713	0.807002	1.21071	0.851154	1	0.94352	1.07736	0.938196	0.659271	0.612637	0.82658	0.760978	1	1.07678	1.11239	1.12617	0.887375	0.926293	0.962648	0.912555		-0.11516	0.856043	0.159152		-0.292043	0.887645	0.145443		-0.773985	0.714866	0.805476		-0.0311735
O60238	BNIP3L	2		1	1.04165	1.10303	0.938229	0.686054	0.467175	0.458808	0.391697									1	1.00838	1.03506	0.900366	0.513788	0.430423	0.339285	0.320512									14.7069	-0.104392	0.384122	0.976382					12.4125	-0.134897	0.324749	0.994339
O60239	SH3BP5	3	4	1	1.0614	1.01547	0.927613	0.537713	0.535332	0.614009	0.706178	1	1.11165	1.09407	1.05007	0.650332	0.607609	0.758416	0.765005	1	1.06033	1.05828	0.997532	0.655089	0.535119	0.69293	0.800581	1	0.930134	1.0837	1.02784	0.722107	0.642486	0.727865	0.661451		-1.13841	0.598308	0.933397		-0.191112	0.695352	0.852545		-0.913669	0.67093	0.854713		-0.620778
O60243	HS6ST1	1		1	1.20494	0.922499	0.812703	0.547984	0.319333	0.177797	0.0568584									1	1.10693	0.879813	0.636104	0.38843	0.228704	0.14007	0									12.2233	-0.113404	0	0.956272					10.1997	-0.12492	0	0.976247
O60244	MED14	30	26	1	0.996611	0.967035	0.749492	0.386136	0.169668	0.0960784	0.0821545	1	0.923492	0.901074	0.733987	0.398589	0.174476	0.103341	0.0980002	1	0.979078	0.916101	0.734847	0.373581	0.17523	0.0985208	0.0814051	1	0.991033	0.944118	0.742396	0.376221	0.180695	0.117804	0.109079	10.8506	-0.140408	0	0.999139	10.7826	-0.1322	0	0.986959	10.7084	-0.137341	0	0.995356	10.7584	-0.140287
O60245-3	PCDH7	1		1	0.865665	2.4382	2.21743	0.975403	0.795197	1.22634	3.27447									1	0.586131	0.647229	0.664461	0.453194	0.584223	0.55805	0.914717										2.14097	1.5	0.0931852							0.62762	0.493757
O60256	PRPSAP2	19	20	1	1.02041	0.950667	0.818449	0.575866	0.528198	0.749466	0.977306	1	0.955245	0.969926	0.838088	0.587694	0.574237	0.7487	0.956736	1	1.04069	1.10048	0.93315	0.615329	0.562042	0.759212	0.989491	1	0.951002	0.965113	0.829498	0.642061	0.632891	0.720631	0.752741		-0.78314	0.707709	0.51875		-0.741772	0.716842	0.533279		-0.672766	0.731518	0.58058		-0.842927
O60259-2	KLK8	2		1	0.804402	0.913197	0.931305	0.692181	0.554444	0.699804	0.739265									1	0.994115	1.26388	0.937531	0.627561	0.597139	0.599889	1.01288										-0.146308	0.667832	0.580594						-0.975685	0.709367	0.538076
O60264	SMARCA5	26	18	1	1.01773	0.933134	0.69089	0.311626	0.11277	0.0592409	0.0521594	1	0.98809	0.912985	0.672922	0.315219	0.13575	0.094529	0.0959189	1	0.99019	0.916578	0.668948	0.292696	0.116766	0.0655885	0.0539559	1	0.983995	0.926783	0.680588	0.294766	0.164882	0.105739	0.0813359	10.2198	-0.159874	0	0.997082	10.1387	-0.143211	0.00255723	0.995524	10.0481	-0.157664	0	0.996451	10.1539	-0.148251
O60266	ADCY3	8		1	1.09248	1.09082	0.868287	0.522203	0.350999	0.286898	0.236339									1	0.999256	1.01442	0.840202	0.535741	0.308349	0.246416	0.236625									12.3013	-0.124067	0.213362	0.981598					12.1872	-0.120065	0.170114	0.99826
O60268	KIAA0513	3	1	1	1.12778	1.07072	0.922208	0.575861	0.430461	0.33859	0.248663	1	1.0361	1.05727	1.10617	0.546814	0.382852	0.160579	0	1	0.931098	0.998125	0.852461	0.576395	0.380058	0.279383	0.22356	1	0.949793	1.31512	0.945338	0.654402	0.255128	0.133875	0	13.2675	-0.107191	0.224155	0.971381	13.0658	-0.138949	0	0.963403	12.9669	-0.0967998	0.102068	0.993703	12.9635	-0.158935
O60271-4	SPAG9		48									1	0.934217	1.01715	0.902303	0.661311	0.724219	0.889844	0.771466									1	0.99765	1.05153	0.952796	0.823968	0.777782	0.913588	0.707034						-0.612396	0.76171	0.723986						-0.0578524
O60271	SPAG9	54		1	0.980035	1.00371	0.875057	0.61662	0.604889	0.8501	0.982133									1	0.973273	0.996535	0.873955	0.619045	0.606494	0.84145	0.876881										-0.596478	0.763435	0.472175						-0.626291	0.735967	0.641108
O60282	KIF5C	4	10	1	0.994264	1.00052	0.855515	0.567521	0.535837	0.352667	0.0453323	1	1.10851	1.07274	0.890318	0.617358	0.483064	0.29607	0.136674	1	0.919656	0.975757	0.817956	0.625533	0.484857	0.283336	0.0276211	1	1.09222	1.09987	0.990678	0.722301	0.504762	0.273967	0.166827	13.6558	-0.0880923	0	0.942921	13.847	-0.0907671	0	0.972115	13.4415	-0.0965785	0	0.949609	14.672	-0.0993597
O60284	ST18		1									1	1.10558	1.04082	0.791268	0.491682	0.426101	0.47969	0.574307									1	1.00122	0.980668	0.880479	0.522979	0.467753	0.505149	0.535341					9.40976	-1.4842	0.492945	0.956201						-0.224491
O60287	URB1	15	12	1	1.00593	0.960727	0.658304	0.270515	0.132613	0.118638	0.151386	1	0.969495	0.939613	0.688759	0.28407	0.127179	0.0836332	0.0657107	1	1.00537	0.946714	0.64776	0.24528	0.122746	0.112968	0.104272	1	1.00247	0.946302	0.677044	0.27123	0.145381	0.0851549	0.0748108	9.86058	-0.191929	0.108231	0.997638	10.1379	-0.163372	0.0186186	0.997458	9.78144	-0.190466	0.0792425	0.998252	10.0504	-0.165948
O60291-2	MGRN1	8	7	1	1.01127	1.00032	0.892379	0.559258	0.483744	0.537158	0.59927	1	1.04558	1.08189	0.923043	0.629278	0.540875	0.656844	0.587704	1	0.974101	0.950606	0.78334	0.51494	0.410634	0.511288	0.510566	1	0.978506	1.02342	0.967482	0.673473	0.608334	0.564416	0.491047		-0.216596	0.541531	0.982144		-0.156727	0.596329	0.955484	12.2022	-0.189751	0.479712	0.975686		-0.0969485
O60292	SIPA1L3	4	1	1	1.09599	1.08986	0.931604	0.583313	0.419009	0.468879	0.502928	1	1.3753	1.65635	1.17637	0.494397	0.637461	0.429649	0.106327	1	0.946283	0.956003	0.86725	0.511137	0.388086	0.459399	0.396746	1	1.09128	0.973017	1.04545	0.708836	0.410615	0.292395	0.358526	13.4908	-0.154613	0.46048	0.962726	15.0148	-0.0858939	0	0.625012	12.0536	-0.157814	0.407838	0.983632	13.4148	-0.17823
O60293	ZFC3H1	10	11	1	1.01488	1.07592	0.66639	0.23768	0.0993541	0.0981085	0.0940948	1	1.00011	0.928361	0.668932	0.247087	0.113195	0.109894	0.0879196	1	0.922945	0.912067	0.551166	0.218057	0.093281	0.0771488	0.0859478	1	1.0218	0.880163	0.624935	0.263911	0.128318	0.128653	0.0974439	9.82794	-0.216102	0.0790287	0.994682	9.88533	-0.18869	0.0654563	0.996504	9.20835	-0.164617	0.0137451	0.992349	9.64626	-0.13929
O60294	LCMT2	2		1	0.970895	1.12648	0.935189	0.460775	0.249742	0.190025	0.0591018									1	0.877539	0.931134	0.66093	0.393968	0.172492	0.174502	0.073806									11.9142	-0.1597	0.0842029	0.981069					10.4217	-0.123723	0	0.979636
O60303	KIAA0556	5	1	1	0.998097	1.04912	0.89605	0.481599	0.312563	0.217839	0.215521	1	1.10281	1.1697	0.924294	0.386434	0.0798827	0.037329	0.0121479	1	0.982973	0.99723	0.793767	0.472912	0.283343	0.183167	0.160319	1	1.03822	1.08255	0.697926	0.237127	0.0783935	0.0791291	0.0387086	11.918	-0.149167	0.193377	0.996605	11.4048	-0.221117	0.00119344	0.978212	11.6715	-0.117664	0.0651935	0.999403	10.0082	-0.207977
O60306	AQR	26	24	1	0.998207	1.00467	0.804512	0.444764	0.236793	0.14002	0.104736	1	1.01457	1.00287	0.797283	0.433615	0.237787	0.174759	0.170038	1	1.00517	1.05118	0.847248	0.455926	0.224848	0.139358	0.117654	1	1.01634	0.962024	0.814268	0.453675	0.260687	0.170884	0.165849	11.4715	-0.129831	0.0246322	0.999818	11.2728	-0.14046	0.117239	0.999297	11.5973	-0.145293	0.066974	0.997421	11.5199	-0.131065
O60307	MAST3	2	1	1	0.996667	1.03388	0.855679	0.578889	0.542082	0.8034	1.01914	1	1.36227	1.08055	0.704076	0.477296	0.223623	0.149512	0.265331	1	1.03931	1.13398	0.949682	0.580807	0.529326	0.757038	1.2689	1	1.25467	1.0926	0.884614	0.482205	0.29648	0.285042	0.264793		-0.676427	0.735877	0.464826	10.9874	-0.132742	0.151433	0.889408		-0.553924	0.784019	0.249995	11.7659	-0.158335
O60308	CEP104		1									1	1.02012	0.982404	0.855124	0.404603	0.212022	0.310095	0.254572									1	1.13388	1.11837	0.974177	0.435609	0.371741	0.260012	0.158045					11.0104	-0.196641	0.250629	0.991488					11.7952	-0.187783
O60313-2	OPA1	44	43	1	0.993629	0.957927	0.764198	0.396839	0.130031	0.0564469	0.0507297	1	1.02463	0.984634	0.780972	0.397637	0.158668	0.127537	0.14365	1	0.991765	0.953342	0.762175	0.390942	0.136829	0.0645069	0.0530195	1	1.02705	0.966188	0.786694	0.368728	0.186263	0.115738	0.128355	10.875	-0.15562	0	0.996742	10.9198	-0.157541	0.082873	0.996852	10.8547	-0.153434	0	0.997192	10.8614	-0.160326
O60318	MCM3AP	11	3	1	0.992933	0.986167	0.799462	0.363973	0.147692	0.108681	0.152052	1	1.03519	1.03776	0.815413	0.385404	0.203483	0.159401	0.117201	1	1.02021	0.986363	0.769137	0.36696	0.158879	0.120272	0.129668	1	1.11328	0.997168	0.873585	0.422032	0.243068	0.198176	0.132693	10.8051	-0.177824	0.0967319	0.997248	11.0621	-0.161779	0.101305	0.997412	10.7484	-0.162998	0.0797815	0.998456	11.4568	-0.162006
O60331-3	PIP5K1C	4	1	1	0.987292	0.971423	0.776726	0.48215	0.290032	0.219503	0.269137	1	1.16002	1.05844	1.03097	0.531372	0.471571	0.427592	0.410159	1	1.02229	1.01155	0.838301	0.502545	0.297367	0.242646	0.239618	1	0.894094	0.997477	0.857636	0.631313	0.382647	0.572131	0.260965	11.5151	-0.123273	0.184142	0.994817	12.2124	-0.35694	0.436157	0.957285	11.8897	-0.130148	0.189893	0.998399	14.3062	-0.0808595
O60333-2	KIF1B	48	45	1	0.998696	1.01341	0.850771	0.588738	0.528109	0.57782	0.231411	1	1.03146	1.03505	0.895912	0.620819	0.593687	0.521631	0.142891	1	1.00812	1.02411	0.887149	0.609272	0.542429	0.541973	0.195503	1	1.02756	1.03753	0.948688	0.722596	0.634884	0.415162	0.127911	15.4605	-0.0613707	0	0.918464	15.3447	-0.0698239	0	0.916206	15.3176	-0.0659935	0	0.930145	15.6931	-0.0861656
O60333-3	KIF1B	3	3	1	1.03944	1.10426	0.881195	0.452916	0.208029	0.173854	0.0856145	1	1.0926	1.01382	0.844727	0.46236	0.297176	0.201499	0.130021	1	1.01873	0.992028	0.733754	0.417468	0.218608	0.159197	0.171321	1	1.06469	0.957363	0.810973	0.410884	0.199734	0.156715	0.0938891	11.6568	-0.157529	0.0794768	0.988779	11.8297	-0.125902	0.0835144	0.990624	10.9152	-0.134087	0.0940533	0.997965	11.2216	-0.144409
O60336	MAPKBP1	5	1	1	0.881008	0.920449	0.75512	0.384974	0.190529	0.138699	0.104988	1	1.05409	1.05272	0.744549	0.303566	0.0922576	0.026487	0.0356161	1	1.00703	0.922605	0.741998	0.425203	0.195047	0.1355	0.122881	1	1.09266	0.945051	0.789613	0.395793	0.108131	0.234316	0.134805	10.871	-0.1348	0.0275865	0.981427	10.4413	-0.183003	0	0.995195	11.0011	-0.122828	0	0.995181	10.8375	-0.170144
O60337	2021-03-06	3	3	1	0.973752	1.11198	1.03262	0.636629	0.504573	0.520963	0.386863	1	0.607011	0.869261	0.854802	0.578057	0.54666	0.412225	0.227273	1	0.904156	1.02053	0.86005	0.624426	0.538601	0.445519	0.351713	1	0.868092	0.989669	0.689398	0.605816	0.412484	0.336632	0.234738	13.7389	-0.190974	0.464988	0.957289	14.4004	-0.0680076	0	0.608466	15.3203	-0.0691325	0.210792	0.972432	12.9001	-0.0762599
O60341-2	KDM1A		29									1	0.864564	0.898091	0.797578	0.544296	0.360001	0.222841	0.146881									1	0.98785	1.01486	0.828289	0.567669	0.345562	0.208907	0.148259					12.3489	-0.0958781	0	0.964768					12.6245	-0.101769
O60341	KDM1A	29		1	0.973865	0.977363	0.811378	0.551197	0.38379	0.252493	0.0958722									1	0.995632	1.00525	0.834062	0.573215	0.380838	0.245294	0.10764									12.6014	-0.0982519	0	0.990764					12.8192	-0.0997043	0	0.994859
O60343	TBC1D4	32	33	1	0.983761	0.992074	0.854479	0.548112	0.277338	0.129688	0.0841294	1	0.862501	0.93941	0.827466	0.545973	0.241299	0.108744	0.0995628	1	0.999065	0.996671	0.874466	0.562349	0.272296	0.127395	0.0850313	1	0.988155	1.04921	0.834192	0.550243	0.235406	0.110942	0.0883004	12.2664	-0.125652	0	0.998454	12.0387	-0.127197	0	0.973988	12.3938	-0.129015	0	0.999118	12.0997	-0.131114
O60344-4	ECE2	4	4	1	1.07229	1.38627	1.1849	0.775612	0.714867	0.38966	0.0541797	1	1.28138	1.30417	1.22621	0.877542	0.779677	0.591885	0.226884	1	0.773209	0.867761	0.698807	0.552482	0.527739	0.334483	0.049924	1	0.953834	1.01172	1.00956	0.909528	0.552159	0.338238	0.174118	16.3652	-0.122634	0	0.825611	18.1664	-0.0994037	0	0.754941	12.4153	-0.0810566	0	0.814845	15.6742	-0.119131
O60346	PHLPP1	5	2	1	0.975808	1.03949	0.823029	0.542745	0.337331	0.178352	0.0518017	1	1.23434	1.13755	1.06617	0.749541	0.505959	0.197275	0.166401	1	1.01358	0.977021	0.806684	0.543412	0.302197	0.171111	0.0666683	1	0.990773	1.05831	0.890527	0.654627	0.410908	0.235995	0.104753	12.3337	-0.114643	0	0.990762	14.5936	-0.117922	0.0317277	0.929722	12.1463	-0.115069	0	0.995056	13.5566	-0.105113
O60347	TBC1D12	1	2	1	1.13681	1.31268	1.06958	0.442273	0.283141	0.227534	0.113039	1	0.965961	1.00457	0.806788	0.46091	0.234349	0.182398	0.121354	1	0.89456	0.831119	0.750611	0.292014	0.253581	0.127203	0.139071	1	0.989814	0.89284	0.807004	0.440693	0.215877	0.164548	0.141327	11.8039	-0.305726	0.200839	0.915277	11.5396	-0.128915	0.0579394	0.998131					11.3457	-0.133436
O60353	FZD6	13	6	1	0.976281	0.972085	0.819997	0.512317	0.320779	0.255898	0.149467	1	0.898223	0.942438	0.805867	0.486027	0.306825	0.161081	0.111912	1	1.00001	0.989619	0.845069	0.507578	0.352348	0.265184	0.169677	1	0.921655	0.979308	0.726533	0.492352	0.299645	0.167553	0.0904644	12.2619	-0.101059	0.0212337	0.997425	11.8639	-0.111906	0	0.985602	12.3702	-0.105509	0.087868	0.997634	11.5041	-0.109606
O60361	NME2P1	1	2	1	0.84232	0.728241	0.717806	0.594365	0.613101	1.40601	2.28844	1	0.973464	1.01272	0.909819	0.555186	0.817562	1.70421	1.95575	1	1.10173	1.0283	0.944061	0.862629	1.00143	1.65002	2.748	1	1.10297	1.05146	1.10297	1.0287	0.959046	1.60054	2.16609		0.0405193	1.38407	0.29872		0.253865	1.5	0.669612		1.26218	1.5	0.429772		0.31406
O60422	ONECUT3		1									1	1.0251	1.07574	0.744763	0.35396	0.254212	0.158681	0.207501									1	1.40286	0.989011	0.889529	0.464092	0.387343	0	0					10.571	-0.16986	0.173816	0.991288					12.0807	-0.141287
O60427	FADS1	6	7	1	1.00927	0.899257	0.794748	0.415532	0.168958	0.082203	0.0449818	1	1.00026	1.09337	0.901741	0.492596	0.239208	0.134405	0.0834384	1	1.09354	1.09106	0.843336	0.449209	0.180715	0.0862722	0.0588709	1	1.03198	1.08224	0.902086	0.498894	0.204274	0.12581	0.138338	11.1299	-0.147407	0	0.991942	12.0014	-0.147946	0.0441023	0.992784	11.5325	-0.150899	0	0.987688	11.9006	-0.166036
O60437	PPL	19	19	1	0.969993	1.00008	0.869524	0.53635	0.388462	0.377082	0.347045	1	1.08042	1.20997	0.948913	0.587552	0.442284	0.378706	0.268047	1	0.987371	0.990735	0.860352	0.543734	0.376777	0.374715	0.328381	1	1.0205	1.04663	1.01015	0.689806	0.540989	0.386325	0.214179	12.4474	-0.128653	0.337369	0.998018	13.3642	-0.115284	0.283454	0.937825	12.5093	-0.121647	0.315486	0.998176	15.2594	-0.0817011
O60443	DFNA5	15	7	1	0.989376	0.998026	0.874274	0.590116	0.391467	0.261193	0.0932703	1	1.051	0.964299	0.937084	0.66901	0.398711	0.334989	0.187225	1	1.00549	0.985864	0.85035	0.578175	0.41187	0.252024	0.094083	1	0.996966	0.953949	0.876604	0.588297	0.490251	0.22358	0.153169	13.1105	-0.101471	0	0.993278	13.9086	-0.0978294	0.0845153	0.990674	13.0123	-0.0990027	0	0.991028	13.4716	-0.0927026
O60447	EVI5	4	4	1	1.01	0.772937	0.654145	0.344873	0.16799	0.115683	0.14315	1	1.12588	1.02635	0.869775	0.507172	0.331226	0.344301	0.285579	1	1.23247	1.19338	1.01855	0.486726	0.23196	0.157174	0.180446	1	1.09351	1.00368	0.979953	0.504901	0.358348	0.295739	0.242829	9.60508	-0.118087	0	0.971677	12.0059	-0.140858	0.285997	0.979126	11.9638	-0.266989	0.177647	0.939437	12.1449	-0.184024
O60476	MAN1A2	7	10	1	1.00747	0.953589	0.780232	0.463028	0.215167	0.0578234	0.049086	1	1.00353	0.992496	0.821222	0.444958	0.210656	0.149966	0.13776	1	0.961712	1.03154	0.765786	0.448939	0.202884	0.0932309	0.0532667	1	0.973995	1.01231	0.847877	0.46896	0.243119	0.110381	0.134641	11.3431	-0.13919	0	0.993828	11.4017	-0.144041	0.0808194	0.999322	11.2472	-0.13698	0	0.995157	11.6964	-0.139988
O60487	MPZL2	3	4	1	1.01237	1.02597	0.924019	0.609252	0.63148	0.8752	1.42141	1	0.981315	1.03539	0.874321	0.637554	0.68313	0.895679	1.16912	1	1.03206	1.04816	0.880275	0.650069	0.621916	0.910563	1.36979	1	0.990239	1.04416	0.944157	0.825519	0.703944	0.877725	0.9821		-0.288029	0.884336	0.0612707		-0.366342	0.846371	0.200574		-0.424014	0.886522	0.0871979		-0.413555
O60488	ACSL4	41	30	1	0.997215	0.944275	0.778494	0.485257	0.261507	0.136142	0.061594	1	0.85689	0.871323	0.734748	0.446258	0.232032	0.0980581	0.0470435	1	0.990284	0.982182	0.78107	0.472479	0.256113	0.134537	0.0646721	1	0.950915	0.903998	0.710211	0.425873	0.202378	0.0970743	0.0559819	11.5762	-0.121842	0	0.995199	11.0271	-0.126691	0	0.961694	11.5389	-0.12383	0	0.997939	10.7902	-0.12968
O60493	SNX3	9	9	1	0.95385	0.995633	0.922911	0.610409	0.538192	0.487769	0.13125	1	1.04869	1.01571	0.887338	0.693006	0.612774	0.352638	0.0669564	1	0.990754	0.989165	0.882233	0.624577	0.569852	0.444178	0.130926	1	1.00762	0.980419	0.917199	0.80413	0.577492	0.28364	0.0699598	14.8318	-0.0752465	0	0.930758	14.9594	-0.0920813	0	0.946768	14.7687	-0.0755441	0	0.945728	15.2376	-0.116916
O60499	STX10	10	7	1	1.03109	1.06149	0.882978	0.616319	0.536912	0.648881	0.62274	1	0.944405	0.898264	0.825906	0.548683	0.505223	0.481318	0.402986	1	1.02906	1.09828	0.951515	0.643283	0.567514	0.700589	0.594044	1	1.07043	1.12989	0.94997	0.655206	0.54236	0.490564	0.372654		-0.200457	0.604423	0.964133	15.3347	-0.0650352	0.228205	0.966875		-0.17119	0.621591	0.937989	15.5586	-0.0873909
O60502	MGEA5	50	43	1	1.00379	1.00703	0.843933	0.51555	0.280367	0.117278	0.045027	1	0.932844	0.968296	0.810444	0.508166	0.2731	0.0861771	0.0412045	1	0.984675	0.971784	0.825342	0.499041	0.274206	0.124608	0.0507658	1	0.986069	1.02202	0.788695	0.493138	0.223755	0.0925654	0.0408079	12.0501	-0.130216	0	0.996906	11.8265	-0.13119	0	0.988967	11.8803	-0.12733	0	0.99666	11.5782	-0.135344
O60504	SORBS3	12	13	1	0.973281	1.05526	0.916813	0.634214	0.672026	1.00014	1.51537	1	0.993266	0.992515	0.854612	0.639101	0.739637	1.01979	1.28727	1	0.91931	0.987625	0.882227	0.628575	0.615838	0.946212	1.28253	1	0.944463	1.03636	0.946444	0.817744	0.83769	1.03369	1.22471		-0.198907	0.947712	0.0134862		-0.238992	0.908082	0.0519417		-0.0959356	0.870897	0.047525		-0.0882654
O60506-3	SYNCRIP	3	46	1	1.01314	1.02785	0.848156	0.522897	0.464882	0.42811	0.294437	1	0.992713	1.02336	0.868969	0.604036	0.495812	0.257065	0.105749	1	1.07625	1.07559	0.899026	0.570058	0.510401	0.417151	0.330798	1	1.05465	1.01301	0.915951	0.750871	0.521348	0.243388	0.109766	13.0113	-0.103366	0.318284	0.983666	13.5941	-0.0943029	0	0.98053	13.8769	-0.0972537	0.331154	0.971983	14.6264	-0.108093
O60506	SYNCRIP	61		1	1.05559	1.0528	0.867232	0.552985	0.416926	0.332166	0.0940094									1	1.06773	1.08169	0.909146	0.574185	0.457422	0.307796	0.0956559									13.1696	-0.0933645	0	0.975092					13.5262	-0.0952003	0	0.971257
O60507	TPST1	4		1	0.820137	0.994619	0.916942	0.484433	0.327175	0.179173	0.0856318									1	0.931131	0.944417	0.902252	0.50456	0.322883	0.20513	0.0870353									12.2944	-0.125309	0.0316131	0.960494					12.4224	-0.115268	0.000127109	0.987579
O60508	CDC40	6	7	1	1.05914	1.05173	0.863426	0.485933	0.248106	0.148555	0.125369	1	1.0057	0.993657	0.811326	0.409802	0.187775	0.10243	0.0714145	1	0.946831	0.981554	0.77515	0.447143	0.231134	0.14449	0.119367	1	1.07625	1.06262	0.935531	0.453554	0.230887	0.128732	0.0835942	11.8572	-0.139247	0.0675843	0.994534	11.2353	-0.145933	0.0107976	0.999955	11.3563	-0.123639	0.0158783	0.996887	11.8125	-0.172128
O60512	B4GALT3	1	1	1	1.38946	1.47501	0.949871	1.0435	0.760592	0.482644	0.242367	1	0.915155	0.875362	0.802859	0.4706	0.447822	0.423475	0.0951987	1	1.61274	1.40569	0.827759	0.577832	0.560611	0.549068	0	1	1.07257	1.16618	0.845481	0.657781	0.536416	0.322214	0.0987208	17.6376	-0.114833	0.0657798	0.685419	12.6343	-0.0808483	0	0.912048	14.4539	-0.0792285	0	0.63911	14.2152	-0.0889494
O60513	B4GALT4	3	1	1	0.97684	1.00363	0.7885	0.51497	0.450943	0.422136	0.281766	1	1.22217	1.03781	0.938865	0.665034	0.493462	0.343022	0.0545456	1	0.970714	0.994753	0.816924	0.56632	0.463114	0.433942	0.260993	1	1.01311	0.906694	0.863705	0.576449	0.458933	0.212365	0.06067	12.9159	-0.0910388	0.261476	0.985296	14.2641	-0.0984072	0	0.931974	13.9496	-0.0727189	0.0798197	0.983804	13.0925	-0.102792
O60518	RANBP6	14	12	1	1.03346	1.03652	0.874472	0.538671	0.345109	0.178947	0.103604	1	1.00866	0.992793	0.843424	0.522208	0.303256	0.162697	0.14119	1	1.05125	1.02824	0.926621	0.556376	0.355289	0.178411	0.102186	1	0.99151	1.00936	0.818542	0.550078	0.340091	0.170713	0.132202	12.5599	-0.112842	0	0.995674	12.2114	-0.114132	0.0153018	0.999257	12.8314	-0.116185	0	0.993993	12.3941	-0.106815
O60524	NEMF	34	36	1	1.01976	0.93055	0.761166	0.443433	0.241157	0.143667	0.0541392	1	0.995839	1.01251	0.833874	0.462523	0.277612	0.160902	0.0594995	1	1.05806	1.00635	0.810711	0.47037	0.25485	0.169166	0.0693985	1	1.06537	1.01662	0.868711	0.512109	0.31554	0.19688	0.0791277	11.2565	-0.124134	0	0.994932	11.8031	-0.124348	0	0.997471	11.7043	-0.122661	0	0.995808	12.3243	-0.115771
O60547	GMDS	1	1	1	0.88948	0.81545	0.634628	0.404211	0.187963	0.0932995	0.0160156	1	1.10782	1.0669	0.807957	0.466681	0.403031	0.258555	0.18329	1	1.13988	1.23134	0.945996	0.396838	0.164467	0.107957	0.0290992	1	1.04168	1.06061	0.834927	0.536292	0.356644	0.280534	0.148882	9.99023	-0.127016	0	0.95827	12.138	-0.1058	0.122733	0.97475	11.5087	-0.207593	0.0564205	0.956708	12.6428	-0.0988081
O60551	NMT2	14	12	1	0.935428	0.990244	0.884829	0.63394	0.408172	0.211336	0.0815255	1	0.981865	1.00017	0.898049	0.630222	0.409564	0.244227	0.239743	1	0.919049	0.942328	0.826298	0.598609	0.403246	0.196101	0.0910318	1	0.975548	1.06294	0.987994	0.674202	0.351529	0.21798	0.215818	13.3409	-0.108748	0	0.988968	13.4423	-0.101111	0.111946	0.997366	12.8783	-0.103206	0	0.978634	13.2648	-0.151976
O60563	CCNT1	11	11	1	0.961953	0.939477	0.774093	0.405566	0.198575	0.0817079	0.0185464	1	1.08061	1.03776	0.823845	0.468548	0.238581	0.113491	0.0597637	1	1.03809	1.01164	0.8268	0.449326	0.210807	0.0858885	0.0460064	1	1.01095	0.981641	0.828896	0.472589	0.212606	0.105522	0.0666988	11.0495	-0.144682	0	0.994143	11.6656	-0.134079	0	0.992952	11.5076	-0.144084	0	0.997913	11.6337	-0.137591
O60566-3	BUB1B	36	28	1	0.979586	0.949061	0.788717	0.455166	0.239445	0.189634	0.155741	1	1.00654	0.995669	0.831619	0.521717	0.332877	0.340402	0.360566	1	1.00698	1.01048	0.824426	0.472582	0.240861	0.181742	0.151134	1	1.0036	0.988651	0.848422	0.526631	0.363567	0.32139	0.3023	11.4165	-0.125038	0.0777766	0.997185	11.9766	-0.133655	0.317461	0.994982	11.6263	-0.133936	0.0927873	0.999234	12.2868	-0.121057
O60568	PLOD3	30	23	1	1.01189	1.03616	0.876831	0.587337	0.509396	0.513495	0.248069	1	0.968084	0.993528	0.867934	0.586086	0.506689	0.446697	0.107108	1	0.997075	0.989953	0.871628	0.584658	0.490697	0.505859	0.216238	1	1.02222	1.06855	0.917411	0.697781	0.564114	0.405317	0.0980953	15.0621	-0.0659155	0.021822	0.953122	14.1132	-0.0785557	0	0.942879	14.7106	-0.0678266	0	0.952903	15.0186	-0.0871497
O60573	EIF4E2	11	7	1	0.974394	1.05373	0.85718	0.448491	0.263817	0.208316	0.122682	1	0.924392	0.940101	0.839104	0.465399	0.286212	0.171752	0.102459	1	0.947555	0.936592	0.858424	0.446706	0.27254	0.190154	0.109726	1	1.00092	0.941088	0.913338	0.57053	0.295327	0.160635	0.0691639	11.6558	-0.142046	0.112249	0.994705	11.8679	-0.116945	0	0.99037	11.7164	-0.132927	0.0744773	0.991716	12.6313	-0.127478
O60583	CCNT2	2	4	1	0.938563	0.915191	0.711662	0.406704	0.220164	0.108835	0.0463886	1	1.04777	0.974257	0.706171	0.334814	0.142006	0.0724149	0.0570817	1	0.940015	1.04043	0.717266	0.423827	0.209486	0.113856	0.0684306	1	0.965006	0.880157	0.654206	0.363951	0.166059	0.0981876	0.0593139	10.7686	-0.129115	0	0.990039	10.4232	-0.152412	0	0.997908	10.9613	-0.130717	0	0.99236	10.1499	-0.133355
O60610	DIAPH1	76	69	1	0.981699	0.986474	0.849304	0.539452	0.26328	0.0805928	0.0426721	1	0.982113	0.966759	0.839547	0.536453	0.251025	0.080573	0.0384751	1	0.988367	0.984826	0.858159	0.544129	0.273004	0.0894679	0.0456685	1	0.983419	1.0368	0.863866	0.516329	0.230364	0.0856628	0.0495709	12.1258	-0.138127	0	0.995117	12.0448	-0.138725	0	0.994053	12.2084	-0.136439	0	0.995922	12.0001	-0.143939
O60613	2021-09-15	7	7	1	1.05561	1.03592	0.911758	0.581349	0.509183	0.295304	0.123552	1	0.989083	1.06105	0.888811	0.629775	0.539539	0.307851	0.175353	1	1.02702	0.970285	0.877558	0.585194	0.463748	0.279546	0.158487	1	1.01071	1.04724	0.937679	0.697644	0.50268	0.265933	0.191265	13.7966	-0.0907811	0	0.974581	14.2865	-0.0838524	0	0.979136	13.5089	-0.0891601	0	0.990823	14.4807	-0.0928832
O60637	TSPAN3	5	2	1	0.983386	1.00935	0.871413	0.59933	0.650941	1.07081	1.70068	1	0.956056	0.959155	0.905486	0.620531	0.6748	1.13298	1.59328	1	1.00804	1.01099	0.918033	0.676953	0.702843	1.07047	1.59835	1	0.945971	1.12665	0.950045	0.77046	0.852715	1.0713	1.32269		-0.110857	0.978634	0.000825589			0.977471	0.000706244		-0.0210021	0.99333	0.000349898		0.393745
O60645	EXOC3	18	15	1	0.998607	0.947879	0.711535	0.311958	0.0796551	0.0433054	0.0356888	1	1.02585	0.952194	0.667164	0.326422	0.0797462	0.0636652	0.0533025	1	0.969937	0.934846	0.685489	0.317677	0.0958828	0.0480081	0.0440647	1	0.959931	0.869428	0.646824	0.262132	0.116056	0.0753705	0.0600347	10.2915	-0.173583	0	0.997016	10.1281	-0.161003	0	0.995634	10.1934	-0.163895	0	0.995591	9.78299	-0.154057
O60658	PDE8A	3	1	1	0.992449	1.03711	0.891635	0.489234	0.344871	0.28323	0.359202	1	0.93016	1.35905	0.949087	0.710622	0.543475	0.701095	0.686235	1	1.04842	1.06443	0.847746	0.542413	0.334564	0.353437	0.326616	1	1.02209	0.928556	1.09372	0.760794	0.671921	0.592384	0.598969	11.8161	-0.162499	0.311461	0.993568		-0.118479	0.646982	0.672871	12.2478	-0.128201	0.300592	0.987603		-0.144055
O60664-2	PLIN3	1	2	1	1.01843	2.1556	1.71646	0.897524	1.04712	0.966637	0.523055	1	1.00765	0.960753	0.949193	0.691515	0.965703	0.824269	0.153464	1	0.515194	0.674422	0.488714	0.469399	0.530467	0.579998	0.196539	1	1.2737	1.31708	1.63418	1.84465	1.2564	0.927675	0.12332					19.3092	-0.276049	0	0.828764	7.34934		0	0.667943	18.5631	-1.0232
O60664-3	PLIN3		43									1	0.924653	0.949475	0.846401	0.708001	0.709802	0.63007	0.138425									1	1.00915	1.03384	0.930106	0.789333	0.74635	0.633703	0.155665					17.0112	-0.063105	0	0.790381					17.7849	-0.0875817
O60664	PLIN3	55		1	0.995168	0.975097	0.904584	0.632523	0.648715	0.812379	0.340615									1	1.05376	1.05107	0.955494	0.682178	0.699374	0.801105	0.320993										-0.0413999	0	0.729382					20.6929	-0.0442341	0	0.763481
O60669	SLC16A7	2	1	1	0.911926	0.811628	0.671254	0.451715	0.242554	0.194149	0.17547	1	0.835515	0.788583	0.695243	0.437773	0.263094	0.283871	0.191034	1	1.07834	1.08828	0.874468	0.511567	0.307033	0.239583	0.216795	1	0.932406	0.924776	0.745753	0.460735	0.465266	0.196722	0.132068	10.4607	-0.100114	0	0.969935	10.5816	-0.0924299	0	0.929559	12.0823	-0.135582	0.184009	0.986247	11.9284	-0.0925476
O60671	RAD1	7	6	1	0.923516	0.952655	0.830095	0.57169	0.440287	0.421763	0.327935	1	0.920554	0.982842	0.8515	0.602561	0.431613	0.348017	0.254916	1	1.04906	1.0075	0.917466	0.632774	0.494598	0.431206	0.352763	1	0.919348	0.979514	0.809534	0.650246	0.481104	0.374142	0.269467	13.653	-0.0839903	0.256343	0.98234	13.7109	-0.0808268	0.0713165	0.989167	14.5386	-0.0904012	0.322596	0.992759	14.3558	-0.0702007
O60674	JAK2	3		1	0.962298	1.06085	0.817409	0.432422	0.170963	0.12284	0.119863									1	0.951383	0.95325	0.788664	0.394204	0.175974	0.106073	0.0839589									11.2748	-0.154579	0.0634674	0.993835					11.0411	-0.145778	0.0188074	0.996431
O60678	PRMT3	22	10	1	0.980233	0.961858	0.79739	0.405609	0.148437	0.0607591	0.0397982	1	1.11096	1.02529	0.861466	0.482201	0.319095	0.257815	0.227507	1	1.00869	0.995065	0.807319	0.400755	0.150072	0.0654775	0.0369134	1	1.08415	1.07017	0.905561	0.512295	0.322479	0.270855	0.217246	11.0817	-0.157017	0	0.997743	11.8681	-0.13751	0.208146	0.986649	11.1149	-0.159002	0	0.999374	12.1726	-0.142385
O60684	KPNA6	17	14	1	1.01573	1.03053	0.890159	0.560347	0.292914	0.165366	0.105169	1	0.793034	0.868734	0.734016	0.503999	0.252632	0.10972	0.0706435	1	0.990066	1.02931	0.900047	0.525584	0.303226	0.17962	0.108334	1	0.982141	0.93503	0.701713	0.454902	0.213496	0.132698	0.0862779	12.5341	-0.121958	0.00605368	0.998786	11.3191	-0.11818	0	0.928644	12.3832	-0.12535	0.0404314	0.998119	10.9348	-0.120522
O60701	UGDH	41	33	1	0.980513	0.969522	0.795616	0.50027	0.33363	0.298741	0.156549	1	0.976772	0.968238	0.801189	0.503336	0.345146	0.202786	0.0530135	1	1.0009	0.959269	0.822186	0.502704	0.340415	0.282212	0.149839	1	0.984223	0.98198	0.8039	0.490415	0.300589	0.144555	0.0564659	12.2412	-0.094066	0.0129409	0.994207	12.0628	-0.109444	0	0.989966	12.354	-0.095922	0.00768805	0.995005	11.8337	-0.11998
O60704	TPST2	4		1	0.894248	0.915367	0.806046	0.48267	0.329049	0.247808	0.137122									1	1.02019	0.969971	0.84717	0.52808	0.32468	0.21149	0.111293									12.0317	-0.098908	0	0.978282					12.3825	-0.107745	0	0.998089
O60716-3	CTNND1	49		1	0.989917	0.984943	0.768658	0.372067	0.11536	0.0618203	0.06781									1	0.964963	0.942502	0.74815	0.360775	0.122342	0.0700076	0.0693984									10.7994	-0.160062	0	0.998087					10.6661	-0.154969	0	0.995759
O60716	CTNND1		43									1	0.925017	0.901426	0.735237	0.378235	0.127132	0.0704658	0.0728813									1	0.958816	0.907256	0.663411	0.321882	0.136551	0.0883243	0.0674877					10.6473	-0.148444	0	0.986266					10.1006	-0.144431
O60725	ICMT	3	3	1	1.04649	1.11193	0.930193	0.437216	0.155896	0.0435719	0.0235886	1	0.996846	0.943349	0.811143	0.379788	0.142449	0.067814	0.0646992	1	0.899878	0.865758	0.633146	0.33181	0.131793	0.0571045	0.0363548	1	0.988679	0.955453	0.701255	0.369414	0.150076	0.0798309	0.0317822	11.6856	-0.187274	0.000932224	0.990412	11.0242	-0.161099	0.00637208	0.9974	9.87626	-0.145839	0	0.979044	10.5074	-0.147259
O60733	PLA2G6	2	1	1	1.01769	1.0219	0.744286	0.387939	0.152729	0.0610649	0.0358862	1	1.07185	1.14928	0.972638	0.397853	0.191378	0.154547	0.168972	1	1.04954	0.981645	0.804557	0.398372	0.118342	0.151764	0.0461868	1	1.05086	1.1215	0.976585	0.419737	0.269512	0.140807	0.198467	10.8042	-0.152866	0	0.997318	11.5145	-0.263048	0.161199	0.980302	11.052	-0.158137	0.0252361	0.993067	11.6159	-0.229653
O60749	SNX2	32	26	1	0.990705	0.974569	0.831392	0.595273	0.455798	0.179798	0.0536547	1	1.01218	1.01305	0.875689	0.625112	0.40953	0.140045	0.0679226	1	0.991739	0.9579	0.843876	0.60325	0.445441	0.183215	0.0586851	1	0.987747	1.02602	0.922438	0.638412	0.361651	0.141415	0.0598468	13.0277	-0.105473	0	0.97521	13.1569	-0.117494	0	0.988674	13.0924	-0.106509	0	0.978648	13.1827	-0.128388
O60762	DPM1	20	13	1	1.00314	1.01312	0.773254	0.395697	0.146113	0.0654037	0.0521474	1	0.991649	0.979056	0.726666	0.393885	0.193632	0.118907	0.0916595	1	0.981553	0.960264	0.727501	0.368272	0.153498	0.0750593	0.0535093	1	0.963732	0.911849	0.752515	0.381298	0.198239	0.115333	0.0805557	10.9535	-0.154135	0	0.998571	10.8327	-0.131123	0	0.999667	10.6409	-0.147996	0	0.998383	10.864	-0.132946
O60763-2	USO1	71	64	1	0.989051	1.01237	0.81112	0.440723	0.170427	0.058873	0.0444776	1	1.01173	0.990045	0.800435	0.43423	0.152385	0.0685349	0.0377915	1	0.990444	0.948266	0.788376	0.435545	0.167607	0.0682999	0.0505133	1	0.982729	0.964488	0.757142	0.387949	0.146799	0.0644232	0.0421415	11.3266	-0.152818	0	0.997935	11.2263	-0.153758	0	0.997922	11.1909	-0.147402	0	0.996154	10.8362	-0.152876
O60765	ZNF354A	2		1	1.19983	1.10032	0.886964	0.474039	0.324019	0.253968	0.293614									1	1.08261	1.09624	0.723709	0.390537	0.292709	0.247895	0.214881									11.7387	-0.160381	0.262848	0.952833					10.6863	-0.154203	0.216547	0.982618
O60783	MRPS14	2	5	1	0.923986	0.893157	0.729262	0.475222	0.336506	0.319176	0.238291	1	1.17842	1.2075	0.958383	0.60165	0.421994	0.398307	0.234726	1	0.844992	0.978347	0.809554	0.408421	0.342925	0.325024	0.261032	1	1.06201	1.03621	0.989578	0.600744	0.476573	0.317209	0.181732	11.8184	-0.0835895	0	0.98489	13.4495	-0.11394	0.260242	0.915802	11.067	-0.165745	0.287971	0.961761	14.0044	-0.0946669
O60784-2	TOM1		7									1	0.970307	1.01311	0.94835	0.656699	0.626956	0.86676	0.801254									1	0.942916	1.06072	0.944672	0.725219	0.737697	0.758602	0.642705						-0.684785	0.737917	0.749776						-0.110889
O60784	TOM1	9		1	0.959245	0.996743	0.850946	0.543655	0.551996	0.783998	0.837166									1	0.994546	1.0203	0.867556	0.579529	0.572702	0.77834	0.822988										-0.878356	0.679204	0.691098						-0.883228	0.68839	0.769665
O60825-2	PFKFB2		14									1	0.961747	0.97137	0.823939	0.6052	0.536111	0.525216	0.36022									1	1.0055	1.04669	0.921043	0.713437	0.591037	0.495014	0.334578					16.0846	-0.0598802	0.158705	0.975591					16.7851	-0.0598254
O60825	PFKFB2	12		1	0.963266	1.00582	0.836681	0.589518	0.510767	0.591938	0.506521									1	0.97647	0.986165	0.854975	0.586076	0.518937	0.541193	0.482289										-0.130868	0.532897	0.981709						-0.117496	0.5015	0.994017
O60826	CCDC22	14	12	1	0.988725	0.97754	0.815661	0.560334	0.378278	0.12871	0.0878904	1	0.985382	0.986666	0.847245	0.565138	0.380683	0.187407	0.1242	1	0.992919	1.0197	0.845964	0.564209	0.395253	0.128142	0.0674145	1	0.972468	1.01862	0.86812	0.61302	0.311339	0.178236	0.111966	12.4499	-0.111343	0	0.987879	12.7293	-0.104326	0	0.99622	12.6475	-0.115062	0	0.986606	12.8206	-0.115449
O60828	PQBP1	11	6	1	0.973229	1.00754	0.876123	0.608251	0.572243	0.833388	1.2431	1	1.01216	0.976899	0.899001	0.651729	0.596006	0.753327	1.02805	1	0.971878	0.999916	0.892637	0.622049	0.591744	0.848637	1.11394	1	0.949287	0.895521	0.898402	0.760443	0.670831	0.763093	0.777702		-0.384238	0.814246	0.161782		-0.743501	0.757279	0.471789		-0.572076	0.794091	0.272375		-0.0299793
O60830-2	TIMM17B	3	1	1	0.977188	1.05615	0.812278	0.442844	0.251305	0.154268	0.112314	1	1.04596	0.980563	0.877918	0.475678	0.344385	0.191752	0.313044	1	0.970709	0.982973	0.818409	0.436381	0.230521	0.149117	0.106882	1	1.06861	1.10646	1.02021	0.49469	0.618068	0.444547	0.388806	11.5065	-0.132974	0.0533564	0.99592	11.7876	-0.150962	0.244818	0.985574	11.4411	-0.135886	0.0473922	0.999095	11.8976	-0.594296
O60831	PRAF2	3	2	1	0.97701	1.00216	0.841894	0.56153	0.427365	0.435459	0.337341	1	0.899882	0.985	0.83159	0.573808	0.424614	0.317835	0.240657	1	0.987418	1.02761	0.895261	0.635053	0.500986	0.468565	0.297792	1	0.992185	1.00734	0.877339	0.645876	0.47169	0.379176	0.242666	13.1743	-0.10273	0.336001	0.993335	13.3396	-0.0823429	0.042285	0.984217	15.0426	-0.072875	0.17553	0.983543	14.454	-0.0751276
O60832	DKC1	23	25	1	1.04848	1.02	0.810576	0.46655	0.390168	0.461594	0.545362	1	1.00824	0.976584	0.783657	0.461358	0.421858	0.479132	0.481681	1	1.01765	1.00064	0.760476	0.454914	0.371462	0.437674	0.494853	1	1.02607	0.967627	0.825258	0.571349	0.484195	0.500425	0.504588	9.90122	-0.519265	0.465889	0.973288	9.80375	-0.528576	0.460982	0.994181	10.4431	-0.262755	0.436887	0.985599	16.5074	-0.123703
O60841	EIF5B	73	60	1	0.972995	0.858534	0.659357	0.334737	0.126147	0.0551498	0.0483823	1	0.987014	0.976683	0.763519	0.370296	0.147045	0.0592968	0.0531925	1	1.041	0.95614	0.755428	0.360965	0.144211	0.0734495	0.0506713	1	0.974608	0.943692	0.749692	0.37294	0.149726	0.0672085	0.0551826	10.035	-0.147238	0	0.985887	10.805	-0.155615	0	0.998991	10.7311	-0.154016	0	0.997522	10.7462	-0.150912
O60858-3	TRIM13	3	3	1	1.063	1.15855	0.944502	0.626476	0.366653	0.22938	0.140524	1	1.02008	1.01135	0.807513	0.48561	0.311269	0.155355	0.101056	1	0.916374	0.963493	0.863092	0.478194	0.288427	0.21221	0.0991963	1	0.998794	0.920263	0.882473	0.453618	0.26446	0.155198	0.104565	13.2964	-0.116312	0.0589723	0.973554	11.9049	-0.114494	0	0.997513	12.0163	-0.120976	0.041186	0.98866	11.7846	-0.140942
O60869	EDF1	8	10	1	0.944084	0.854949	0.721757	0.471273	0.35241	0.363784	0.472277	1	0.970635	0.929633	0.744894	0.464063	0.37937	0.412174	0.540677	1	0.970218	0.900917	0.708405	0.445523	0.344021	0.358667	0.494361	1	0.946184	0.925243	0.779975	0.539708	0.479413	0.446088	0.462907	11.9693	-0.0918419	0.305935	0.943257	10.5159	-0.253707	0.446254	0.957379	10.6278	-0.182385	0.397401	0.953436	14.1875	-0.0916255
O60870	KIN	8	9	1	0.966925	0.932672	0.741289	0.327935	0.132938	0.0576572	0.0309494	1	1.04909	0.982854	0.772377	0.363263	0.149464	0.0759262	0.0357511	1	0.978657	0.914052	0.683311	0.3484	0.148915	0.0637881	0.041134	1	1.06252	1.01212	0.793919	0.395687	0.15284	0.0812678	0.0507805	10.526	-0.162493	0	0.996199	10.8282	-0.15694	0	0.99796	10.3063	-0.147539	0	0.994461	11.0576	-0.153718
O60879	DIAPH2	19	16	1	1.02813	0.989867	0.764487	0.405359	0.150707	0.070929	0.0746327	1	1.03132	1.00684	0.800857	0.418386	0.161271	0.0841229	0.099949	1	1.0016	0.988207	0.782783	0.40997	0.14792	0.0806355	0.0761323	1	1.00038	0.939433	0.757933	0.388088	0.149267	0.106609	0.0788886	10.9574	-0.147721	0	0.997614	11.1632	-0.151221	0.0236541	0.997352	11.0564	-0.148505	0	0.998477	10.858	-0.142322
O60884	DNAJA2	29	23	1	1.02191	0.986252	0.836294	0.487778	0.293636	0.172657	0.0935437	1	0.912648	0.950296	0.776112	0.496324	0.281745	0.148684	0.104476	1	0.982093	0.979394	0.790429	0.487817	0.283273	0.160227	0.100028	1	1.00248	0.991544	0.814961	0.525808	0.278416	0.16237	0.11985	11.9943	-0.116816	0	0.99874	11.6944	-0.113934	0	0.988954	11.7567	-0.114956	0	0.998839	12.0541	-0.114316
O60885	BRD4	17	14	1	0.984943	0.966029	0.84457	0.571188	0.450834	0.423494	0.349007	1	0.969759	1.03751	0.92738	0.607302	0.528687	0.480547	0.364869	1	1.03676	1.06238	0.927147	0.605394	0.490492	0.450377	0.364757	1	0.97166	1.00202	0.913159	0.710047	0.576348	0.456483	0.316548	13.5815	-0.0927218	0.31733	0.995798	14.788	-0.0949353	0.386371	0.980797	14.0788	-0.106722	0.381395	0.985564	16.2553	-0.0631015
O60888-2	CUTA	3	2	1	1.19036	1.16778	1.01323	0.680272	0.703371	0.864068	0.830551	1	1.03842	1.1867	1.31976	0.945872	0.782567	1.00288	1.19555	1	0.97836	1.07033	0.946567	0.712786	0.625891	0.747321	0.852165	1	1.10815	1.12115	1.00628	0.85316	0.950231	0.635805	1.13921		-0.633571	0.769563	0.660866			1.47619	0.0523424		-0.711401	0.734541	0.818098		-0.0875938
O60890	OPHN1	4		1	1.03173	1.07543	0.899846	0.504439	0.275461	0.176492	0.169677									1	0.915065	1.02041	0.834129	0.51108	0.276066	0.167159	0.128044									12.0465	-0.147229	0.130871	0.993647					12.039	-0.119065	0.0239497	0.991973
O60906	SMPD2	7	1	1	1.13385	1.01385	0.873365	0.569401	0.353647	0.217534	0.125263	1	0.884076	1.54905	1.00896	0.451257	0.551168	0.573185	0.622142	1	1.03787	1.05708	0.889997	0.553511	0.323537	0.221026	0.120499	1	1.30118	1.14626	0.666736	0.612839	0.753141	0.545014	0	12.8192	-0.105533	0	0.982695		-1.18449	0.549438	0.637342	12.6446	-0.114358	0.0343567	0.994221	14.9901	-0.066417
O60907	TBL1X	15	16	1	0.984788	0.92385	0.825813	0.600403	0.521974	0.532103	0.156949	1	1.01957	1.02504	0.884803	0.615903	0.580661	0.507128	0.0798354	1	1.01811	0.957756	0.813495	0.6464	0.539256	0.552057	0.156148	1	1.00481	0.990283	0.923691	0.710044	0.616933	0.432966	0.0963861	14.6271	-0.0667667	0	0.911781	14.9028	-0.0753073	0	0.903846	15.0954	-0.0651785	0	0.908177	15.4786	-0.0855883
O60911	CTSV	4	5	1	1.00837	0.917886	0.82286	0.617912	0.608235	0.909632	1.45209	1	0.886327	1.06158	0.827145	0.595254	0.613759	0.767603	0.860797	1	1.00463	1.00159	0.834759	0.636558	0.608894	1.00249	1.3053	1	0.92436	0.972299	0.954326	0.667793	0.657353	0.787084	0.816133		-0.292229	0.882146	0.0428903		-0.730321	0.709353	0.660993		-0.433696	0.8776	0.0807219		-0.711457
O60921	HUS1	5	5	1	1.08619	1.04898	0.918733	0.556461	0.40114	0.365152	0.344067	1	0.782473	0.871317	0.739636	0.490603	0.369262	0.306285	0.33978	1	1.07867	1.16661	0.932152	0.607272	0.39202	0.402497	0.364328	1	0.938551	0.984068	0.709592	0.595937	0.394346	0.376414	0.373213	12.6814	-0.137061	0.338853	0.986867	12.181	-0.0777562	0.0384044	0.889755	13.1166	-0.13576	0.358555	0.955237	12.9498	-0.0848882
O60925	PFDN1	13	16	1	1.17694	1.13758	1.0553	0.804788	0.800148	1.3095	1.89526	1	1.15089	1.22998	1.10871	0.804819	0.85094	1.14729	1.47814	1	1.18595	1.23224	1.14689	0.859735	0.876413	1.38093	1.92208	1	1.19941	1.26503	1.17759	0.962547	1.00981	1.046	1.23916		0.938822	1.5	0.663545		0.623182	1.47815	0.543639		0	1.5	0.605235		0.0786108
O60927	PPP1R11	3	5	1	1.06268	1.13901	1.07293	0.615017	0.600649	0.849753	1.33899	1	0.406882	0.624118	0.718408	0.698685	0.789076	0.727492	0.817248	1	0.914191	1.01231	0.818337	0.611365	0.548369	0.723282	1.00352	1	0.770988	1.0238	0.643975	0.773108	0.473324	1.2122	1.13297		-0.0689348	0.855018	0.151827						-0.685518	0.721635	0.457244
O60930	RNASEH1	5	2	1	0.958559	1.08772	0.874738	0.517256	0.296421	0.17574	0.158218	1	0.803426	0.87825	0.705141	0.438105	0.218435	0.0442103	0.0173876	1	0.906584	0.96394	0.775619	0.487233	0.266928	0.117853	0.100844	1	0.979284	0.965948	0.743939	0.460385	0.201438	0.0656543	0.0418142	12.1745	-0.130053	0.0942948	0.990341	10.7853	-0.135082	0	0.939225	11.5919	-0.119577	0	0.988054	11.1394	-0.137157
O60931-2	CTNS	2	1	1	1.01961	0.959764	0.782343	0.51725	0.416056	0.364997	0.275244	1	0.88238	0.950089	0.855427	0.661589	0.426695	0.261133	0.437548	1	0.986052	0.90175	0.808828	0.503838	0.430654	0.386601	0.266961	1	1.07631	1.05669	0.843952	0.452799	0.398345	0.243966	0	12.7326	-0.0863803	0.170474	0.996157	13.6941	-0.0975169	0.289212	0.924198	13.1783	-0.0728906	0	0.982538	12.2089	-0.110668
O60934	NBN	18	8	1	0.977808	1.00246	0.84648	0.481539	0.262401	0.153142	0.133153	1	0.968153	1.04648	0.839864	0.517585	0.267876	0.199576	0.196786	1	1.00311	1.03085	0.857217	0.490628	0.26326	0.14269	0.1303	1	1.00982	1.03696	0.922656	0.580614	0.276487	0.212783	0.14747	11.8262	-0.13101	0.06012	0.999266	11.9588	-0.129531	0.12809	0.994682	11.909	-0.133129	0.0565777	0.998494	12.5722	-0.140455
O60936-2	NOL3	8	5	1	0.986598	0.96782	0.801705	0.646553	0.632825	0.908519	1.42254	1	1.08367	1.01758	0.950352	0.689516	0.715394	0.99692	1.25863	1	0.96841	0.961809	0.83204	0.66313	0.655835	0.949948	1.29945	1	1.02219	1.03304	1.00225	0.811656	0.815559	1.22849	1.10529		-0.30696	0.882427	0.0457535		-0.203738	0.915115	0.0858515		-0.317157	0.880081	0.0580837		-0.00903023
O60941	DTNB	3	2	1	0.964858	0.982052	0.803546	0.499375	0.244988	0.0925609	0.090535	1	1.10069	1.05386	0.906265	0.540265	0.233714	0.164688	0.0583178	1	0.996019	1.00156	0.888563	0.514068	0.242959	0.131411	0.112873	1	1.06308	1.02149	0.867442	0.511901	0.331164	0.297252	0.152031	11.713	-0.128458	0	0.995548	12.2958	-0.138952	0.0124095	0.988551	12.0703	-0.141809	0.048685	0.999712	12.3559	-0.114219
O60942	RNGTT	20	15	1	1.01206	0.97867	0.846396	0.488018	0.234338	0.101754	0.0702889	1	0.998507	0.968474	0.839542	0.529321	0.256935	0.170368	0.144958	1	0.956908	0.993424	0.812912	0.480356	0.220319	0.0990996	0.0778715	1	0.968069	1.04993	0.827963	0.457961	0.240521	0.154322	0.12494	11.8134	-0.136176	0	0.999046	12.0691	-0.12134	0.0417318	0.997906	11.6201	-0.134065	0	0.997036	11.5874	-0.13686
O75027-2	ABCB7	10	9	1	0.979625	0.957652	0.744453	0.397757	0.179884	0.0981147	0.0916043	1	1.02498	1.00336	0.820894	0.432064	0.243352	0.200057	0.20764	1	0.999009	1.00017	0.761123	0.392425	0.187808	0.120421	0.102492	1	1.07178	0.988079	0.85384	0.424273	0.279118	0.185699	0.181973	10.8825	-0.135863	0	0.998146	11.275	-0.152899	0.169331	0.998663	10.9329	-0.143074	0.0384633	0.999642	11.4335	-0.153777
O75037	KIF21B		1									1	1.01475	0.936379	0.79184	0.533674	0.172386	0	0.139482									1	0.873652	0.727426	0.810539	0.220834	0.141463	0.141869	0.228566					11.6346	-0.141973	0	0.974062					10.0091	-0.325429
O75044	SRGAP2	19	14	1	0.99546	0.987885	0.819898	0.483931	0.234077	0.146457	0.0773298	1	0.931755	0.985174	0.856593	0.485984	0.184173	0.0864585	0.0691876	1	1.04312	1.03657	0.890945	0.530044	0.242956	0.148272	0.0942441	1	0.991343	1.02013	0.90062	0.485424	0.195846	0.104934	0.063717	11.7309	-0.126957	0	0.999455	11.7388	-0.148162	0	0.994963	12.1917	-0.138023	0.0330092	0.997104	11.8824	-0.157903
O75051	PLXNA2		2									1	1.12228	1.05925	0.859666	0.528251	0.580413	0.723509	0.684312									1	1.13871	1.22746	1.20529	0.764537	0.689037	0.771199	0.967132						-0.964763	0.629121	0.878226						-0.10327
O75052	NOS1AP	6	6	1	1.0359	0.970727	0.837702	0.557691	0.453405	0.433749	0.27852	1	1.04227	0.995881	0.85223	0.623515	0.573912	0.45075	0.260043	1	0.968909	1.03861	0.83759	0.550272	0.497057	0.461042	0.315256	1	0.968869	1.0036	0.916633	0.649613	0.586221	0.551334	0.338543	13.7474	-0.0792511	0.182836	0.985086	15.2901	-0.0644139	0	0.974216	13.8071	-0.0891463	0.319505	0.976524	17.0113	-0.0553602
O75054	IGSF3	10	7	1	0.989976	1.01881	0.863758	0.576019	0.560616	0.575809	0.233186	1	1.09934	1.06481	0.925023	0.621221	0.660295	0.545109	0.235721	1	0.98603	0.956995	0.833979	0.583688	0.589317	0.551226	0.238294	1	1.04002	1.01406	0.992952	0.704906	0.646581	0.458843	0.240416	15.6513	-0.0606207	0	0.911287	16.4877	-0.0612283	0	0.902791	15.6563	-0.0592441	0	0.91986	16.3362	-0.0716683
O75061-2	DNAJC6	5	2	1	0.972047	1.02923	0.902868	0.57956	0.443586	0.29281	0.20692	1	1.09824	1.1019	0.902077	0.685393	0.683746	0.926846	0.771086	1	0.998411	0.991057	0.937266	0.530996	0.385656	0.281799	0.227295	1	1.06221	1.10313	0.914724	0.822027	0.812566	0.738916	0.565918	13.5019	-0.0923675	0.0719476	0.992883		-0.584003	0.766768	0.704198	12.5752	-0.131853	0.224692	0.99563		-0.0320077
O75063	FAM20B	8	8	1	0.975818	0.924907	0.765751	0.511232	0.256765	0.177572	0.0334638	1	1.10547	1.10938	0.916963	0.549623	0.315243	0.187789	0.0690244	1	1.03102	0.990593	0.847749	0.53376	0.318103	0.179336	0.061723	1	0.987476	1.01703	0.871556	0.477012	0.257281	0.122247	0.0548174	11.6397	-0.118188	0	0.986802	12.6467	-0.122566	0	0.979516	12.3211	-0.116953	0	0.995819	11.9186	-0.135626
O75064	DENND4B	3	3	1	1.0294	1.07796	0.871027	0.473993	0.285917	0.14275	0.0713919	1	0.971604	0.945677	0.774799	0.403374	0.184954	0.154415	0.157351	1	1.04138	1.03664	0.891173	0.458156	0.248873	0.13212	0.102139	1	0.956723	1.08535	0.807361	0.411059	0.231738	0.204543	0.143764	12.0101	-0.128041	0	0.992068	10.9442	-0.148942	0.0986674	0.99528	11.7859	-0.150488	0.0673105	0.996707	11.1757	-0.152364
O75069	TMCC2		1									1	0.978409	1.09889	0.674725	0.334995	0.200273	0.275523	0.303606									1	1.0765	0.807904	0.737889	0.391187	0.300243	0.272264	0.252046					9.83548	-0.238584	0.26343	0.981713					10.9411	-0.0894769
O75071	EFCAB14	8	1	1	0.986456	0.953167	0.833164	0.585011	0.571	0.814947	1.15528	1	1.14216	0.847135	1.25747	0.842538	0.61308	0.802626	0.9463	1	1.0235	1.05569	0.886386	0.617504	0.582733	0.899724	1.13252	1	0.826628	1.5498	1.0274	0.598019	0.571309	0.808496	1.02951		-0.104408	0.790177	0.229945		-0.474998	0.884858	0.145243		-0.406473	0.808121	0.280745		-0.181091
O75083	WDR1	86	69	1	0.999717	0.968523	0.856798	0.565197	0.308392	0.106446	0.0458821	1	0.942648	0.950175	0.851786	0.571186	0.289192	0.0886768	0.0525704	1	0.997166	0.982578	0.838316	0.579877	0.310985	0.110182	0.0577197	1	0.989938	0.999786	0.861354	0.563543	0.266732	0.0951092	0.0566483	12.4109	-0.129665	0	0.993648	12.366	-0.13319	0	0.988849	12.4391	-0.125838	0	0.992799	12.3156	-0.136241
O75084	FZD7	2		1	0.997843	0.997748	0.850055	0.566394	0.41344	0.336263	0.259718									1	0.981972	1.075	0.896015	0.549774	0.398737	0.308449	0.206602									13.138	-0.093093	0.172576	0.998867					12.915	-0.107694	0.167594	0.988277
O75093	SLIT1	5	7	1	0.883073	0.8415	0.756666	0.619141	0.618686	1.05344	1.53175	1	1.06344	1.10638	0.932394	0.724679	0.782753	1.16349	1.25002	1	0.931176	0.983079	0.827923	0.691799	0.703285	1.10567	1.37159	1	1.02691	1.04933	0.99927	0.915164	0.952725	1.08981	0.975161			0.900609	0.0140878		-0.0976314	0.970667	0.0182478		-0.171121	0.940054	-0.000918303		-0.0408193
O75096	LRP4	3		1	0.997643	1.12765	0.938463	0.604174	0.414457	0.247046	0.20962									1	1.0421	0.977081	0.818277	0.586417	0.390832	0.216888	0.126906									13.3258	-0.110805	0.132582	0.980023					12.8123	-0.0984714	0	0.993018
O75110	ATP9A	7	2	1	0.996426	0.99583	0.770712	0.434514	0.27204	0.217759	0.108901	1	1.15578	1.0542	0.85392	0.472032	0.260934	0.141074	0.128074	1	1.00372	0.945514	0.734359	0.441981	0.242403	0.219021	0.108581	1	1.14529	1.05404	0.877893	0.411071	0.272751	0.150361	0.145528	11.4285	-0.115969	0.0356829	0.997518	11.7861	-0.136933	0.0654359	0.97828	11.2186	-0.110108	0	0.996596	11.4575	-0.162669
O75113	N4BP1	17	12	1	1.00523	1.0024	0.835165	0.588189	0.496148	0.380287	0.391323	1	1.01826	1.02734	0.87807	0.641809	0.465052	0.324746	0.331505	1	0.966085	0.959861	0.841199	0.583149	0.457953	0.383099	0.372151	1	1.02877	1.0866	0.905235	0.624314	0.49705	0.447162	0.2983	14.0187	-0.0868888	0.318947	0.996246	14.0228	-0.0885032	0.214823	0.995155	13.6683	-0.0900257	0.303391	0.995606	14.6213	-0.0821673
O75116	ROCK2	74	67	1	0.960115	1.00405	0.852764	0.579932	0.403925	0.123668	0.0643905	1	0.974733	1.01772	0.890117	0.631584	0.399782	0.111375	0.0622525	1	0.998154	0.987322	0.87003	0.606334	0.412226	0.12796	0.0715835	1	0.975861	1.03573	0.910276	0.675124	0.352596	0.116334	0.078694	12.7779	-0.115955	0	0.983726	13.1638	-0.124732	0	0.98787	13.0217	-0.116553	0	0.986715	13.3052	-0.133441
O75123	ZNF623	1		1	1.1093	1.2766	0.992877	0.549429	0.449587	0.471123	0.290466									1	0.834888	1.15546	0.69811	0.506051	0.392572	0.400172	0.312703									12.6225	-0.179254	0.391367	0.887207					11.3825	-0.131362	0.348668	0.91004
O75128-2	COBL	1	1	1	0.821301	0.838943	0.706047	0.487381	0.267365	0.277943	0.244334	1	1.23767	1.10579	0.811541	0.507717	0.313786	0.29909	0.213965	1	1.02113	1.19536	1.12337	0.555157	0.406382	0.384076	0.385039	1	1.11632	1.05508	0.838722	0.53103	0.3189	0.182061	0.219898	11.2046	-0.0879438	0	0.927762	11.969	-0.120377	0.190643	0.937356	12.1841	-0.470865	0.391754	0.939588	12.1852	-0.119742
O75131	CPNE3	49	32	1	0.961816	0.948652	0.788743	0.512716	0.379658	0.351743	0.262423	1	0.855155	0.898595	0.797143	0.512184	0.321533	0.23407	0.118913	1	0.975017	0.959114	0.807728	0.521308	0.371623	0.34201	0.277161	1	0.927637	1.00658	0.746963	0.484028	0.26111	0.161599	0.0816775	12.4487	-0.0923472	0.173662	0.993696	12.0566	-0.100713	0	0.962841	12.385	-0.102025	0.222816	0.996678	11.4903	-0.11648
O75132	ZBED4	1	3	1	0.970124	1.00841	0.889062	0.452255	0.256135	0.162704	0.132178	1	0.946804	1.02668	0.81632	0.450616	0.253913	0.188717	0.199529	1	0.842188	0.931126	0.720085	0.357503	0.195565	0.159739	0.1169	1	0.995194	1.00326	0.955687	0.501784	0.26176	0.171768	0.148302	11.7144	-0.153915	0.110095	0.998542	11.4201	-0.142651	0.149268	0.995265	10.5868	-0.137054	0.0560275	0.971048	12.0811	-0.173644
O75140	DEPDC5	4	1	1	0.990582	0.952614	0.743106	0.459097	0.234841	0.141888	0.0780953	1	1.05497	1.02498	0.924643	0.500087	0.162684	0.0945592	0.0684971	1	1.05407	1.0082	0.898256	0.524885	0.274163	0.128592	0.0966807	1	0.959975	0.999338	0.84933	0.433578	0.194888	0.105279	0.0825216	11.2414	-0.121112	0	0.997198	11.946	-0.18105	0.040329	0.997008	12.2666	-0.133055	0.0167794	0.997076	11.4664	-0.151896
O75143-5	ATG13	3	3	1	0.945942	1.07822	0.851722	0.592976	0.412357	0.384809	0.467926	1	0.951824	1.07711	0.759021	0.589208	0.378449	0.307602	0.360103	1	0.904247	1.41072	0.981343	0.528525	0.383547	0.388382	0.446352	1	1.03362	0.994247	0.8679	0.614427	0.417604	0.31605	0.248836	13.2201	-0.117967	0.39991	0.970297	12.6239	-0.099475	0.264124	0.972411	12.2148	-0.247476	0.404802	0.816091	13.5693	-0.0883852
O75144-2	ICOSLG	2	1	1	1.0795	1.00507	0.887598	0.548578	0.468356	0.635021	0.880828	1	1.02577	0.978959	0.953549	0.62747	0.671828	1.1489	1.60444	1	0.929676	0.963335	0.796432	0.541813	0.412749	0.607543	0.81873	1	0.940868	1.05191	1.09903	0.790606	0.94816	1.22865	1.32581		-1.10069	0.633196	0.726843		-0.00703365	0.997526	3.42615e-05		-0.77819	0.595209	0.714303		0.528876
O75145	PPFIA3	10	5	1	1.00321	0.947929	0.826963	0.472044	0.212695	0.119179	0.124181	1	1.08671	1.02146	0.852608	0.508287	0.218245	0.18826	0.124436	1	1.0242	1.04767	0.866379	0.465584	0.222778	0.121896	0.109141	1	1.05617	1.01203	0.86821	0.491266	0.261381	0.179209	0.133085	11.5935	-0.135606	0.0333339	0.996467	11.8851	-0.136691	0.0730959	0.991004	11.7066	-0.148563	0.0558611	0.997314	11.9287	-0.135645
O75146	HIP1R	44	36	1	0.976648	0.975121	0.828824	0.509808	0.263008	0.115457	0.0702919	1	1.05105	1.04359	0.886298	0.522713	0.279913	0.137773	0.080334	1	1.02645	1.02382	0.881063	0.529503	0.267363	0.124883	0.0793208	1	1.02562	1.01517	0.873112	0.501245	0.257835	0.122743	0.0792948	11.9207	-0.127942	0	0.997398	12.2671	-0.128672	0	0.995797	12.2365	-0.131421	0	0.998598	12.0483	-0.132315
O75150	RNF40	45	38	1	0.986249	0.965825	0.834914	0.596146	0.539181	0.608704	0.407702	1	0.958267	0.972789	0.891619	0.658509	0.626387	0.624474	0.294016	1	0.997208	1.00752	0.885845	0.633807	0.558803	0.60229	0.378262	1	1.00102	1.07859	0.940368	0.778918	0.724101	0.691565	0.3124	18.4867	-0.0736566	0.432198	0.949846	17.6271	-0.052503	0	0.902226	17.6311	-0.065243	0.356444	0.949724	19.1915	-0.0546873
O75152	ZC3H11A	12	5	1	0.969785	0.952089	0.741336	0.358074	0.182634	0.13146	0.123119	1	0.976927	1.05703	0.815756	0.39942	0.220883	0.173147	0.120284	1	0.965783	0.954338	0.743201	0.368292	0.197007	0.159797	0.130912	1	1.01207	0.932214	0.770712	0.414883	0.239581	0.16377	0.11136	10.6452	-0.15039	0.0703359	0.997641	11.1631	-0.154845	0.10546	0.995936	10.707	-0.146498	0.0864778	0.997547	11.2036	-0.120814
O75153	CLUH	69	71	1	0.992409	0.975448	0.840517	0.583042	0.521256	0.45608	0.0993733	1	0.979745	0.987413	0.841282	0.613732	0.533825	0.314234	0.0497032	1	1.00955	0.985567	0.864216	0.600479	0.533359	0.433017	0.106277	1	0.998642	1.02147	0.893024	0.657701	0.515918	0.204218	0.0504147	14.0656	-0.0765735	0	0.933733	13.7718	-0.0908886	0	0.952396	14.2582	-0.0783183	0	0.946314	13.8999	-0.10861
O75157	TSC22D2	2	1	1	0.858574	1.01655	0.865154	0.550896	0.557454	0.422766	0.201247	1	0.946833	1.01323	0.948995	0.66497	0.598196	0.370888	0.108101	1	0.901054	0.920846	0.890532	0.555497	0.516967	0.396252	0.158108	1	1.22359	1.07828	1.17704	0.954457	0.721394	0.466713	0.196628	14.4037	-0.0713844	0	0.920681	14.9802	-0.0875493	0	0.955239	13.9907	-0.0775778	0	0.938428	17.2826	-0.109827
O75161	NPHP4	2		1	1.09177	0.979731	0.766288	0.35933	0.168015	0.0959346	0.0608259									1	0.849537	0.964652	0.690677	0.343317	0.158137	0.108344	0.0764233									10.8163	-0.150095	0.00793186	0.993676					10.4047	-0.140674	0.000903253	0.978876
O75164	KDM4A	13	9	1	0.974107	1.04733	0.907889	0.591186	0.405007	0.203395	0.088858	1	0.952196	0.977613	0.859174	0.556922	0.354479	0.204883	0.171456	1	0.949303	0.986935	0.842847	0.565488	0.385239	0.211654	0.0933668	1	1.00436	1.01223	0.908181	0.553581	0.341104	0.189364	0.168671	13.1612	-0.109618	0	0.991417	12.6906	-0.102877	0.0195849	0.996426	12.7441	-0.104209	0	0.99121	12.6224	-0.122153
O75165	DNAJC13	53	45	1	1.01468	0.95105	0.74313	0.338386	0.122243	0.0842341	0.0986379	1	0.941885	0.927714	0.7493	0.355862	0.143068	0.116032	0.0946057	1	1.00062	0.936297	0.715837	0.326875	0.123466	0.0891728	0.0924396	1	0.997483	0.931202	0.692658	0.330816	0.174675	0.110223	0.1148	10.5283	-0.165005	0.0379667	0.996919	10.6456	-0.153678	0.0386215	0.992567	10.3776	-0.158863	0.0281563	0.996596	10.327	-0.14296
O75167-4	PHACTR2	4	3	1	0.924234	1.02338	0.885674	0.630635	0.59985	0.602049	0.331635	1	1.14949	1.13704	0.854353	0.576224	0.558593	0.578955	0.323851	1	0.908508	0.917743	0.823906	0.579294	0.542647	0.560725	0.225119	1	1.00622	1.08943	0.878594	0.58663	0.524211	0.400977	0.190093	17.4564	-0.0524589	0	0.914023	15.5603	-0.0837944	0.400008	0.885604	15.2108	-0.0605387	0	0.889849	14.3593	-0.0760522
O75170-3	PPP6R2		20									1	0.876295	0.981605	0.809539	0.512887	0.32649	0.211566	0.137001									1	0.985511	0.97675	0.780782	0.543013	0.347367	0.215835	0.106403					12.1834	-0.103218	0	0.982087					12.2406	-0.101518
O75170	PPP6R2	16		1	1.0057	0.944302	0.835738	0.489248	0.311237	0.214315	0.154859									1	1.00126	1.01983	0.861284	0.516812	0.305458	0.236686	0.182081									12.0341	-0.112205	0.0608542	0.997127					12.1673	-0.123738	0.134061	0.999217
O75175	CNOT3	11	17	1	0.993266	0.976743	0.795497	0.45748	0.298955	0.278033	0.330474	1	1.05663	1.02405	0.848001	0.52635	0.331437	0.307408	0.27977	1	1.01131	0.979691	0.853914	0.508281	0.313331	0.285865	0.318693	1	1.01546	0.989793	0.85164	0.519865	0.343135	0.295132	0.287576	11.2673	-0.148977	0.278663	0.994996	12.1629	-0.125573	0.248183	0.99439	11.8923	-0.140397	0.271462	0.996223	12.1521	-0.125884
O75179	ANKRD17	24	28	1	0.992102	0.925417	0.73157	0.448261	0.284043	0.225312	0.146339	1	0.993265	0.98552	0.808257	0.484949	0.330928	0.223678	0.185914	1	1.01394	0.964181	0.793218	0.472623	0.301787	0.229177	0.154488	1	0.978264	0.94651	0.809171	0.536079	0.352245	0.250505	0.185624	11.329	-0.101902	0	0.997723	11.9551	-0.109948	0.0938689	0.999454	11.7927	-0.108084	0.0502738	0.998778	12.4844	-0.09255
O75182	SIN3B	16	2	1	1.01126	0.977016	0.807741	0.506821	0.297578	0.189515	0.125747	1	1.03491	1.16465	0.987982	0.540074	0.380572	0.173746	0.165498	1	1.00108	0.978753	0.79366	0.48277	0.28506	0.181006	0.12645	1	1.05731	0.985194	0.987392	0.549475	0.271483	0.159997	0.163201	12.0156	-0.108793	0	0.999648	12.7154	-0.137947	0.13107	0.966506	11.7951	-0.110588	0	0.999941	12.3616	-0.182229
O75190	DNAJB6	7	10	1	0.992953	1.00224	0.829323	0.491212	0.278157	0.130685	0.0616562	1	0.915313	0.937991	0.727669	0.41812	0.2388	0.123797	0.0726157	1	0.998015	0.932388	0.737039	0.451372	0.267762	0.12276	0.0751627	1	0.963541	0.967689	0.731072	0.446134	0.22251	0.135189	0.0871367	11.8863	-0.126059	0	0.998113	10.969	-0.124025	0	0.990076	11.206	-0.119371	0	0.994497	11.1115	-0.122628
O75191	XYLB	5	6	1	1.00176	1.02885	0.929932	0.63844	0.474656	0.318553	0.133649	1	1.00578	1.07497	0.956478	0.624323	0.578671	0.333106	0.16475	1	0.966686	0.934424	0.832216	0.582856	0.449068	0.303829	0.102393	1	1.11538	1.18691	1.04677	0.740545	0.510139	0.259515	0.147613	14.0799	-0.0919803	0	0.989002	14.6889	-0.0844819	0	0.9653	13.2068	-0.0898365	0	0.97669	14.7594	-0.107183
O75197	LRP5	4	5	1	0.98122	0.925991	0.840445	0.490238	0.313864	0.247922	0.157651	1	1.26377	1.25141	0.900803	0.58388	0.482055	0.440387	0.43868	1	1.0181	1.09653	0.871507	0.515568	0.318704	0.256614	0.116438	1	1.00391	1.05036	0.880676	0.63037	0.46764	0.433797	0.369158	12.0862	-0.110314	0.0772576	0.992963	13.743	-0.124162	0.432783	0.847979	12.3715	-0.116175	0.0707683	0.985755	14.307	-0.091785
O75204	TMEM127	2	2	1	1.04618	1.07165	0.853878	0.499824	0.235117	0.12082	0.0832466	1	1.04623	1.02364	0.739717	0.395436	0.224373	0.146594	0.0686351	1	0.992191	0.951062	0.866779	0.444083	0.217469	0.0983485	0.0630157	1	1.01039	0.988432	0.755143	0.461086	0.250451	0.106493	0.129187	11.9345	-0.133717	0	0.993734	11.0008	-0.128507	0	0.99621	11.6404	-0.145089	0.00319125	0.997873	11.358	-0.12007
O75208	COQ9	10	14	1	0.993631	0.982414	0.90954	0.63503	0.616105	0.975437	1.25997	1	0.997456	0.970002	0.854954	0.651773	0.713021	1.02168	1.06567	1	1.05654	1.06864	0.966534	0.689265	0.689723	1.03448	1.28149	1	1.05762	1.09577	0.978383	0.830327	0.888541	1.01839	0.886341		-0.0667392	0.8784	0.078051		-0.371815	0.861419	0.189227		-0.194179	0.92374	0.0675865		-0.235092
O75223	GGCT	23	19	1	0.975006	0.98542	0.841881	0.593174	0.649756	0.972141	1.51517	1	0.721929	0.796077	0.7664	0.657885	0.674876	0.787018	1.01662	1	0.976842	1.0096	0.855671	0.659174	0.649332	1.01807	1.40145	1	0.936057	0.931703	0.763521	0.766534	0.740094	0.984156	0.937483		-0.22468	0.914424	0.0172093		-0.538473	0.78056	-0.225753		-0.31045	0.916739	0.028984		-0.472411
O75251	NDUFS7	5	6	1	1.00274	0.948823	0.798595	0.447344	0.215217	0.0824167	0.0501818	1	1.05595	0.968005	0.743602	0.407904	0.185082	0.0582779	0.0151232	1	0.941704	0.917611	0.759476	0.420029	0.20597	0.0942152	0.0541929	1	0.969197	1.01601	0.814539	0.433018	0.181081	0.0747474	0.034244	11.3708	-0.139023	0	0.996634	10.8944	-0.146908	0	0.993247	11.0491	-0.135153	0	0.991129	11.3308	-0.151072
O75298	RTN2	1	4	1	0.953858	0.956305	0.915544	0.553791	0.403657	0.497226	0.332391	1	0.986496	1.01525	0.921248	0.657282	0.586022	0.45459	0.224606	1	1.05942	1.09023	0.956991	0.657681	0.544272	0.52666	0.328172	1	1.11253	1.15625	1.0224	0.806875	0.686432	0.44074	0.235315	12.7801	-0.140356	0.392639	0.968269	15.5587	-0.0695405	0	0.970693	15.8901	-0.0760575	0.301081	0.952932	16.8147	-0.0838386
O75306	NDUFS2	36	29	1	0.99537	0.948474	0.793377	0.471096	0.257203	0.153969	0.115011	1	0.966247	0.939812	0.79146	0.485973	0.261873	0.159412	0.130575	1	1.00608	0.985659	0.805412	0.468132	0.251221	0.151929	0.0889955	1	1.02655	0.948156	0.796645	0.485736	0.266402	0.174565	0.113322	11.6134	-0.117027	0	0.998411	11.6905	-0.113524	0	0.996121	11.6461	-0.122367	0	0.999791	11.739	-0.113732
O75312	ZNF259	25	23	1	1.00679	0.986294	0.866289	0.627311	0.649232	0.960672	1.43798	1	1.0359	1.0367	0.953556	0.675625	0.696302	0.985429	1.36879	1	1.00938	1.02874	0.893767	0.634073	0.651206	0.966964	1.30974	1	0.966293	1.07676	0.973174	0.762239	0.816276	1.00294	1.08557		-0.237288	0.908297	0.0339585		-0.177823	0.931536	0.0400153		-0.218891	0.890495	0.0818285		-0.228858
O75317	USP12	4	2	1	1.00755	0.956341	0.823871	0.450503	0.268626	0.164962	0.0876133	1	0.810323	0.855622	0.789537	0.447357	0.324705	0.148617	0.0762084	1	1.06787	1.03167	0.828525	0.487835	0.263505	0.200261	0.130967	1	1.21533	1.11016	0.854642	0.594769	0.334256	0.237285	0.120118	11.6856	-0.120778	0	0.9979	11.5414	-0.112822	0	0.932635	11.8389	-0.124607	0.0681737	0.994107	12.878	-0.105347
O75319	DUSP11	2	3	1	1.18291	1.14218	0.931054	0.503488	0.245395	0.162193	0.136806	1	1.13018	0.97535	0.837979	0.517706	0.33323	0.272698	0.245046	1	0.928485	0.903989	0.67632	0.478334	0.231322	0.0850878	0.0698263	1	1.15432	1.02238	0.950905	0.482129	0.315197	0.307924	0.235643	12.0484	-0.165234	0.117905	0.961888	12.1617	-0.117105	0.191765	0.981031	10.8336	-0.120921	0	0.977753	11.9058	-0.186064
O75323	GBAS	6	8	1	0.944038	1.13385	0.976328	0.633281	0.393137	0.233048	0.164379	1	0.916737	0.899288	0.797001	0.554966	0.240865	0.0404021	0.0243409	1	0.893424	0.944773	0.784066	0.514602	0.369784	0.226441	0.128568	1	0.978182	0.942701	0.832436	0.499172	0.171001	0.063254	0.0318329	13.4369	-0.118975	0.0976851	0.97682	11.9194	-0.140293	0	0.96968	12.1909	-0.0972677	0	0.980537	11.6768	-0.153478
O75330-3	HMMR	25	23	1	0.966814	0.97477	0.778003	0.30359	0.0768782	0.0448237	0.0460174	1	1.05312	1.05471	0.875576	0.394655	0.164933	0.141717	0.126619	1	0.997994	0.997882	0.792178	0.323562	0.0860316	0.0570682	0.0596024	1	0.989253	1.01599	0.859244	0.431402	0.185048	0.155811	0.114086	10.5482	-0.188614	0.00481343	0.998045	11.2322	-0.188484	0.108029	0.995138	10.6674	-0.186811	0.0175791	0.998926	11.4121	-0.163375
O75340	PDCD6	13	11	1	0.924494	0.934404	0.880658	0.527478	0.486302	0.80483	1.20803	1	1.07895	1.06335	0.91893	0.669703	0.645157	0.822174	1.1283	1	0.944601	0.945873	0.794086	0.556073	0.549135	0.790351	1.09858	1	1.06943	1.13875	1.02174	0.76856	0.756453	1.02277	0.982276		-0.0836096	0.775718	0.134261		-0.417908	0.816335	0.348715		-0.127127	0.756077	0.276401		-0.072674
O75347	TBCA	17	26	1	0.954594	0.968926	0.849615	0.645969	0.62314	1.03021	1.51243	1	0.931125	0.947546	0.854092	0.685749	0.784978	1.05374	1.37086	1	0.940064	0.981866	0.855466	0.669705	0.661075	1.04456	1.34962	1	1.01445	1.08686	0.922578	0.946175	0.848199	1.15105	1.26183		-0.169196	0.932272	0.00441231			0.946871	0.0083184		-0.217817	0.916084	0.0133946		0.0594958
O75348	ATP6V1G1	4	3	1	0.945048	0.970432	0.892587	0.603029	0.523576	0.529478	0.530387	1	0.866072	1.21988	0.935911	0.675984	0.592005	0.487532	0.52758	1	0.956113	0.854382	0.823474	0.587485	0.505939	0.520382	0.39745	1	1.02783	1.0838	1.05914	0.751427	0.560827	0.558094	0.440818		-0.126471	0.521073	0.987836		-0.0937012	0.501656	0.852224	16.4135	-0.0549618	0	0.958438	19.6749	-0.118601
O75351	VPS4B	26	34	1	0.965809	0.948518	0.836067	0.55444	0.388336	0.211833	0.0320351	1	1.01487	1.0379	0.895169	0.610735	0.428298	0.215053	0.0887665	1	1.02787	1.01688	0.871147	0.589509	0.399158	0.213567	0.0697998	1	0.997781	1.0054	0.918049	0.682574	0.405691	0.181063	0.0970624	12.6069	-0.108716	0	0.98058	13.3362	-0.106222	0	0.990782	13.0174	-0.107923	0	0.990946	13.639	-0.117068
O75352	MPDU1	3	1	1	1.07643	0.97885	0.830309	0.477906	0.354974	0.2748	0.117409	1	0.804827	0.958192	0.78713	0.530885	0.26459	0.150675	0.0522614	1	0.99245	1.01271	0.733889	0.484449	0.323077	0.214034	0.105164	1	0.978783	0.988379	0.839466	0.462371	0.256756	0.128814	0.0863647	12.2856	-0.0988876	0	0.985874	11.8635	-0.120522	0	0.953215	11.6792	-0.103917	0	0.994743	11.7481	-0.128162
O75354	ENTPD6	5	7	1	0.92036	1.00466	0.777277	0.496748	0.315884	0.241914	0.174415	1	1.00362	0.987828	0.78931	0.483264	0.291662	0.266542	0.162866	1	1.01902	0.976189	0.784353	0.511394	0.311099	0.209608	0.189277	1	1.01785	0.985738	0.882032	0.548231	0.342676	0.228632	0.171861	11.9276	-0.104205	0.0624087	0.991681	11.7972	-0.110543	0.0930419	0.997381	11.9901	-0.103207	0.0430253	0.998831	12.6085	-0.112262
O75356	ENTPD5	3	3	1	0.939291	1.09207	0.969267	0.599049	0.390973	0.269294	0.13923	1	1.02496	1.01942	0.799366	0.418348	0.195879	0.113863	0.0642613	1	0.973925	1.07825	0.944376	0.534058	0.350412	0.226475	0.12983	1	1.02683	0.984287	0.822526	0.404275	0.200214	0.122945	0.0970699	13.3435	-0.112152	0.0770416	0.980967	11.2657	-0.139739	0	0.998886	12.6484	-0.12638	0.100549	0.988228	11.2236	-0.151723
O75362	ZNF217	7	3	1	1.02325	1.11333	0.913906	0.55115	0.434934	0.312049	0.22188	1	0.938267	1.06064	0.877944	0.605291	0.443958	0.264325	0.156129	1	1.02059	0.994388	0.925022	0.611373	0.42131	0.285244	0.203094	1	1.0099	1.03237	0.949372	0.606775	0.432856	0.259814	0.246184	13.1139	-0.106291	0.186903	0.977325	13.5206	-0.0929323	0	0.986367	13.555	-0.098419	0.0901479	0.997697	13.4047	-0.111268
O75367	H2AFY	13	6	1	1.05773	1.06255	0.818283	0.380358	0.160373	0.102225	0.0727598	1	0.940608	0.958961	0.75047	0.366077	0.120996	0.0672726	0.0709932	1	0.993789	0.957473	0.780123	0.369438	0.152789	0.101312	0.0849652	1	1.06275	1.01269	0.740832	0.346709	0.149537	0.0892249	0.0872413	11.0612	-0.165383	0.0407257	0.994449	10.6989	-0.155529	0	0.994608	10.853	-0.156675	0.032976	0.998521	10.6062	-0.158999
O75368	SH3BGRL	12	13	1	0.972378	1.20295	1.01308	0.659399	0.711166	0.962516	1.5398	1	0.987543	1.04344	0.89269	0.691461	0.562786	0.886169	1.42087	1	0.851774	0.912282	0.809038	0.596065	0.600236	0.848907	1.1449	1	0.948862	1.08609	0.948066	0.560357	0.735175	0.915443	1.05908		0.376391	1.5	0.540196		-0.266155	0.890321	0.0579521		-0.178473	0.799789	0.0696193		-0.480791
O75369-8	FLNB	200	192	1	0.962136	0.97296	0.838886	0.587259	0.490932	0.380002	0.0949332	1	0.982719	1.0103	0.878454	0.633111	0.547723	0.335269	0.091038	1	1.00355	0.994285	0.851693	0.605257	0.499642	0.355421	0.10823	1	0.997791	1.01566	0.915274	0.714211	0.539946	0.274877	0.0977619	13.6621	-0.0833669	0	0.958849	14.2148	-0.0880386	0	0.963815	13.8203	-0.0847336	0	0.971726	14.5835	-0.101227
O75369	FLNB	1	2	1	0.806428	0.906696	0.709494	0.493113	0.468143	0.401642	0.163233	1	1.01906	0.973021	1.08151	0.706475	0.510303	0.431393	0.172536	1	0.864809	1.02428	0.819194	0.556257	0.468237	0.396329	0.153707	1	1.22218	1.2942	1.01857	0.758068	0.607946	0.344001	0.201523	12.4515	-0.0763827	0	0.890939	15.3172	-0.0863008	0	0.958377	13.5342	-0.0790706	0	0.942841	15.6916	-0.0903282
O75376	NCOR1	2	1	1	0.825558	0.841295	0.845818	0.548637	0.398793	0.410037	0.455234	1	0.97931	0.995591	1.0912	0.642795	0.514412	0.470444	0.458601	1	0.869592	0.997695	0.723619	0.581706	0.47479	0.407655	0.325952	1	1.10291	1.183	1.35905	0.704972	0.67407	0.612489	0.397416	12.6862	-0.128038	0.405412	0.850569	13.3875	-0.274929	0.480185	0.979886	13.7246	-0.0729133	0.167288	0.956374		-0.218905
O75379	VAMP4	1	1	1	1.08916	1.13201	0.899799	0.609208	0.602219	0.825259	0.901311	1	1.10332	1.23881	1.08717	0.788177	0.987588	1.12863	1.40812	1	0.942335	1.00093	0.819681	0.590626	0.56629	0.878692	0.971278	1	0.996795	1.36102	0.975106	0.848116	0.888761	0.894689	1.14346		-0.686825	0.734499	0.657051						-0.646873	0.751722	0.412646		-0.132034
O75380	NDUFS6	5	7	1	0.992332	1.08105	0.931683	0.51324	0.349766	0.494708	1.17225	1	1.04179	1.04796	0.92335	0.509545	0.433701	0.657908	1.34937	1	0.904601	0.937749	0.784588	0.457539	0.317767	0.463681	0.942912	1	1.02012	0.991351	0.893301	0.584349	0.521658	0.861267	1.24771		-1.00613	0.63249	0.402255		-0.996216	0.737631	0.217411		-1.21982	0.545475	0.534737		-0.418981
O75381	PEX14	14	12	1	1.04981	0.889693	0.861525	0.554606	0.528032	0.662685	0.718269	1	1.12861	0.974514	0.865799	0.661333	0.701804	0.847547	0.757865	1	1.0471	1.08352	0.995165	0.632771	0.603122	0.782636	0.793734	1	0.980886	0.993995	0.946269	0.784153	0.743763	0.793137	0.630291		-1.0068	0.615898	0.857196		-0.730208	0.742137	0.795593		-0.839747	0.703066	0.845551		-0.0373893
O75382	TRIM3	5		1	0.983869	1.0267	0.850252	0.419038	0.214283	0.177665	0.195317									1	0.958645	0.926437	0.756197	0.440938	0.223844	0.181879	0.125302									11.256	-0.170558	0.159469	0.99801					11.237	-0.11463	0	0.994222
O75385	ULK1	6	1	1	1.04704	1.28724	1.05447	0.491923	0.249731	0.141475	0.146676	1	1.45417	1.37994	1.02696	0.464773	0.415798	0.356257	0.447727	1	0.830876	0.870302	0.713902	0.389373	0.189553	0.102133	0.0701295	1	1.10862	1.29669	0.841764	0.34748	0.320698	0.41964	0.351659	12.0189	-0.25395	0.161369	0.939627	11.8584	-0.618013	0.406591	0.752001	10.6177	-0.130817	0	0.958501	9.2068	-1.84989
O75386	TULP3	6	3	1	0.937824	1.01148	0.814129	0.526865	0.367665	0.312054	0.167077	1	0.796057	0.900943	0.771639	0.532665	0.306947	0.24743	0.13099	1	1.04116	1.01849	0.930436	0.576156	0.414016	0.302143	0.20508	1	0.958787	0.970418	0.852239	0.544216	0.330797	0.169155	0.132955	12.6442	-0.0917081	0.0263711	0.988898	12.0096	-0.097713	0	0.932768	13.2422	-0.105841	0.151255	0.99294	12.4539	-0.109759
O75390	CS	42	40	1	0.9932	0.917635	0.789923	0.594218	0.528142	0.372118	0.0531318	1	0.965887	0.972061	0.875379	0.658429	0.582805	0.254302	0.0504681	1	1.04345	1.00843	0.888919	0.646375	0.560182	0.357681	0.0635572	1	0.98136	1.03343	0.888436	0.696263	0.581737	0.193645	0.0634077	13.4958	-0.082296	0	0.927557	14.2668	-0.0993347	0	0.9492	14.4065	-0.0895598	0	0.953274	14.4266	-0.109993
O75391	SPAG7	11	10	1	0.96781	0.99989	0.896146	0.608433	0.655466	1.02173	1.48558	1	0.912262	0.988993	0.873137	0.642387	0.63066	0.886439	1.27225	1	1.03102	1.02276	0.934278	0.693443	0.701048	1.06673	1.49293	1	0.980355	1.1114	0.943265	0.766406	0.80911	1.03374	1.15394		-0.167808	0.933472	0.0108888		-0.0964536	0.860652	0.0607027		-0.0763891	0.977685	0.00475129		-0.129253
O75394	MRPL33	3	2	1	1.11783	1.28299	1.15843	0.823173	0.728492	1.04859	1.14199	1	1.14047	1.28277	1.25928	0.884567	0.853802	1.1339	1.245	1	1.16606	1.2554	1.06193	0.802852	0.744892	1.02617	1.10138	1	1.3145	1.36562	1.38213	1.09238	1.07954	1.08386	1.0976						0.409415	1.245	-0.0100396		-0.0343314	0.922076	0.0998599
O75396	SEC22B	17	19	1	1.07424	0.997517	0.823178	0.534222	0.286675	0.126155	0.0866468	1	1.05722	1.00429	0.847176	0.525916	0.255572	0.1124	0.0798178	1	1.00045	0.994995	0.838897	0.501952	0.287204	0.143526	0.0769471	1	1.05569	1.02201	0.861662	0.495119	0.251022	0.114129	0.0767061	12.097	-0.121565	0	0.992828	12.0615	-0.130457	0	0.996049	12.015	-0.12249	0	0.998908	11.9575	-0.1336
O75398	DEAF1		1									1	1.30222	1.31641	1.05923	0.713724	0.383517	0.436371	0.583774									1	0.993645	1.18352	1.06417	0.842131	0.463081	0.348156	0					12.2963	-1.19684	0.467887	0.775983					14.9681	-0.127821
O75400-3	PRPF40A		25									1	0.933787	0.890104	0.648831	0.34573	0.198183	0.181586	0.168743									1	0.949031	0.848753	0.631497	0.334639	0.21194	0.175085	0.163002					10.0971	-0.119991	0.0418882	0.989481					9.86067	-0.112739
O75400	PRPF40A	26		1	0.942971	0.851149	0.588843	0.30502	0.149958	0.0932415	0.103133									1	0.959991	0.819823	0.573485	0.299003	0.148482	0.102959	0.098705									9.4375	-0.132816	0	0.989996					9.18805	-0.131209	0	0.989606
O75410-2	TACC1	15	19	1	0.967281	0.971189	0.868499	0.567679	0.571143	0.753933	0.903795	1	1.06154	1.06051	0.909512	0.635775	0.643946	0.809205	0.884991	1	1.00175	1.01794	0.901256	0.613479	0.617762	0.809126	0.886235	1	1.00657	1.06689	0.989985	0.759852	0.792174	0.863973	0.858751		-0.79689	0.699137	0.627621		-0.621169	0.74348	0.734907		-0.797376	0.731651	0.697471		-0.478629
O75414	NME6	3	4	1	0.950444	1.03268	0.952949	0.574562	0.499559	0.445822	0.324909	1	1.05194	1.06444	0.847705	0.67858	0.526666	0.373553	0.273769	1	1.00376	1.14711	0.952952	0.568501	0.478959	0.411784	0.282716	1	1.02299	1.02353	1.04446	0.659197	0.479495	0.402652	0.254364	13.6149	-0.117592	0.374914	0.975944	14.9551	-0.0706774	0	0.984209	13.4349	-0.11447	0.321991	0.956215	14.2613	-0.10848
O75417	POLQ	3		1	0.996812	0.97533	0.69498	0.388933	0.230058	0.148397	0.118363									1	1.09984	0.97547	0.697218	0.381076	0.206957	0.148879	0.18422									10.7207	-0.122799	0.0184798	0.999911					10.5264	-0.141634	0.109373	0.989032
O75419-3	CDC45	2	4	1	1.09995	0.956326	0.798026	0.396163	0.163064	0.0690257	0.0208337	1	1.05449	1.02498	0.825647	0.436163	0.213021	0.0752914	0.0422874	1	1.0041	0.98974	0.744961	0.408001	0.16322	0.0743601	0.042342	1	1.04344	1.01382	0.818997	0.508812	0.191505	0.104871	0.0419334	11.067	-0.156257	0	0.990953	11.4447	-0.146422	0	0.996088	10.892	-0.146163	0	0.997859	11.7277	-0.141279
O75420	GIGYF1	3	3	1	1.10972	1.02823	0.842495	0.498082	0.292735	0.222575	0.197576	1	1.10974	1.01961	0.89709	0.497567	0.328562	0.310813	0.355773	1	0.952217	0.988718	0.791617	0.512502	0.286247	0.191284	0.169624	1	0.956453	1.01048	0.884987	0.544412	0.400691	0.29543	0.287177	11.9205	-0.12836	0.147224	0.98746	11.8576	-0.164409	0.316552	0.982633	11.9277	-0.108932	0.0357162	0.996387	12.6743	-0.116729
O75425	MOSPD3	1		1	0.973901	1.06372	0.76282	0.517666	0.437301	0.455741	0.418586									1	1.02569	0.955314	0.862666	0.582077	0.45308	0.452017	0.449657									12.1426	-0.137918	0.428118	0.988538					13.7741	-0.114589	0.428208	0.993455
O75427	LRCH4	10	7	1	1.08941	1.10527	0.898622	0.502719	0.275693	0.199603	0.19149	1	0.964721	1.01107	0.771244	0.466197	0.275403	0.275996	0.203674	1	0.981938	1.04136	0.850196	0.450082	0.25488	0.168418	0.158842	1	0.924154	0.929961	0.718831	0.411881	0.284985	0.189674	0.208554	12.0021	-0.150596	0.160335	0.983262	11.4434	-0.124206	0.170485	0.995527	11.5755	-0.146583	0.119574	0.997721	10.9614	-0.114502
O75431	MTX2	10	6	1	1.01619	0.979224	0.803717	0.463895	0.202129	0.0945298	0.0647119	1	1.1245	1.05991	0.897522	0.488136	0.244833	0.158906	0.0738836	1	1.00571	0.979935	0.798149	0.46932	0.213718	0.0924495	0.0716203	1	0.994372	1.01646	0.850575	0.427859	0.234339	0.137771	0.105367	11.4625	-0.138019	0	0.998304	12.0004	-0.142756	0.041792	0.98463	11.4839	-0.13504	0	0.998101	11.4852	-0.148399
O75436	VPS26A	26	17	1	1.01256	0.939329	0.781761	0.48131	0.232427	0.0948434	0.0771003	1	1.02606	0.986428	0.824082	0.482262	0.205076	0.0925874	0.066155	1	1.03734	1.07461	0.848082	0.48739	0.230259	0.109711	0.081605	1	1.01379	1.07321	0.863809	0.467733	0.215865	0.0956021	0.0537709	11.484	-0.128681	0	0.99444	11.6373	-0.139533	0	0.998043	11.8362	-0.135825	0	0.993893	11.7515	-0.14585
O75438-2	NDUFB1	1	2	1	1.03869	1.52645	1.45098	0.922459	0.668455	0.626687	0.609786	1	1.06194	1.22001	1.13828	0.765957	0.782128	0.834458	0.967632	1	0.945193	1.0385	0.785322	0.710812	0.542005	0.582879	0.532845	1	1.07011	1.19694	1.02079	0.87584	0.923519	0.559648	0.795922		-0.116536	0.616685	0.455825		-0.0679368	0.838467	0.479981		-0.0694074	0.505589	0.957252		-0.044556
O75439	PMPCB	47	31	1	0.993957	0.966328	0.826469	0.585242	0.512502	0.680081	0.554915	1	0.838831	0.862266	0.784893	0.61633	0.569324	0.526003	0.360261	1	1.01692	1.01007	0.884426	0.628147	0.54323	0.658105	0.542235	1	0.945154	1.00594	0.822246	0.652783	0.539533	0.499596	0.238629		-0.312196	0.58303	0.94536	16.8739	-0.0538712	0	0.880169		-0.130469	0.580108	0.969811	15.3287	-0.063576
O75446	SAP30	5	6	1	1.03698	1.01798	0.852883	0.475098	0.25161	0.187839	0.158207	1	0.978281	0.984746	0.776131	0.426552	0.1988	0.102408	0.0612491	1	0.968706	0.948404	0.781034	0.424644	0.2379	0.201168	0.143673	1	0.975013	0.956554	0.750872	0.418257	0.205055	0.126901	0.0642051	11.7282	-0.140572	0.1161	0.998228	11.183	-0.137294	0	0.998954	11.2219	-0.130075	0.0909291	0.996638	11.0448	-0.130778
O75448	MED24	22	20	1	0.998156	0.95994	0.764625	0.446033	0.217994	0.123745	0.120348	1	1.00834	1.00114	0.802844	0.438034	0.187614	0.0928533	0.0888836	1	1.00059	0.964486	0.785586	0.428997	0.204807	0.116642	0.108387	1	0.999195	0.995871	0.836332	0.401588	0.199025	0.110367	0.0853334	11.2656	-0.12343	0	0.998085	11.3318	-0.139882	0.000871052	0.998932	11.2365	-0.1336	0.0170704	0.998753	11.2659	-0.155658
O75449	KATNA1	12	10	1	0.96379	1.0036	0.768663	0.404312	0.211625	0.167941	0.104253	1	0.999803	0.969011	0.727841	0.394903	0.230619	0.164421	0.126974	1	1.06108	1.02803	0.835468	0.418094	0.24461	0.165899	0.140781	1	1.03334	0.964228	0.758194	0.420559	0.256354	0.154394	0.124568	11.0603	-0.137328	0.0583846	0.998083	10.874	-0.126994	0.0492949	0.999877	11.3486	-0.151086	0.11366	0.995784	11.2141	-0.119473
O75460	ERN1	6	2	1	0.988591	1.03396	0.876478	0.445468	0.278466	0.187362	0.106363	1	1.01955	1.14447	0.932867	0.598986	0.547342	0.453432	0.433118	1	0.974192	0.98853	0.863535	0.490948	0.261026	0.156198	0.150338	1	0.942939	0.913407	0.885044	0.784687	0.615645	0.404571	0.396074	11.7504	-0.141588	0.0929026	0.996013	14.7874	-0.113929	0.446348	0.955943	11.8888	-0.136549	0.086216	0.998835	16.9967	-0.058851
O75461	E2F6	2	2	1	1.02164	0.933686	0.723268	0.444612	0.205965	0.0836694	0.00984151	1	1.17476	1.011	0.857973	0.41701	0.198803	0.0586671	0.06743	1	1.00356	0.993039	0.798486	0.523082	0.199948	0.0777172	0.0557871	1	1.12883	1.09003	0.902889	0.394493	0.219666	0.114378	0.115088	10.9593	-0.135849	0	0.989517	11.4398	-0.156315	0.00695575	0.978393	11.7076	-0.138695	0	0.993356	11.3853	-0.185846
O75462	CRLF1	2	1	1	1.0909	1.14592	0.885065	0.546476	0.329537	0.148639	0.0470904	1	1.12892	1.03929	0.832201	0.526309	0.255533	0.170132	0.177692	1	0.99116	1.02533	0.803546	0.527307	0.314869	0.171036	0.07793	1	1.01835	1.19723	0.96695	0.494432	0.312331	0.244342	0.16086	12.5243	-0.125565	0	0.974019	11.9779	-0.126919	0.0870891	0.981443	12.1118	-0.113541	0	0.995314	12.1178	-0.169416
O75467	ZNF324	1	1	1	1.05017	0.939695	0.621314	0.355757	0.190613	0.0880557	0.0164894	1	1.08331	1.24304	0.80698	0.472449	0.251344	0.1369	0.147309	1	1.26501	0.990473	0.854046	0.274391	0.172547	0	0	1	1.1921	0.959911	0.903537	0.469277	0.243529	0.175955	0.246563	10.0658	-0.138074	0	0.992742	11.6083	-0.136742	0.0777023	0.949432	10.8109	-0.19947	0	0.956186	11.6855	-0.175893
O75475	PSIP1	18	19	1	0.903656	0.997055	0.795046	0.416676	0.259959	0.204805	0.189029	1	1.06719	1.01176	0.800346	0.452925	0.263895	0.186961	0.132386	1	0.955114	0.893053	0.737897	0.424161	0.249112	0.195454	0.182251	1	0.991957	0.977326	0.805264	0.479395	0.29118	0.188585	0.128002	11.1691	-0.145002	0.15779	0.989913	11.5438	-0.125044	0.0669462	0.995419	11.0734	-0.107602	0.025658	0.98943	11.8516	-0.110505
O75477	ERLIN1	27	21	1	0.999741	0.91428	0.697251	0.323086	0.0726799	0.0321887	0.0352802	1	1.03391	0.96392	0.766845	0.335034	0.0957874	0.0525933	0.0448587	1	1.0393	0.957078	0.721816	0.327192	0.0901337	0.0423211	0.0450202	1	1.05037	0.909463	0.719257	0.285051	0.15901	0.0692096	0.0501864	10.2326	-0.171098	0	0.992562	10.6308	-0.172685	0	0.997622	10.3967	-0.16958	0	0.99636	10.3127	-0.156593
O75478	TADA2A	1	3	1	1.13394	1.21756	1.04952	0.532053	0.280924	0.179127	0.275855	1	0.956884	1.13468	0.795057	0.468165	0.286175	0.238544	0.195728	1	1.11883	1.11484	0.969277	0.552048	0.311338	0.137854	0.182869	1	0.952697	1.04662	0.831112	0.470505	0.252753	0.167336	0.0880109	12.1311	-0.305214	0.240109	0.944102	11.5489	-0.131927	0.165488	0.978063	12.4731	-0.159467	0.138286	0.97433	11.7722	-0.126704
O75486	SUPT3H	1		1	1.05499	1.02628	0.713743	0.286859	0.153522	0.0646367	0.00513987									1	0.948581	0.891696	0.648113	0.27731	0.127578	0.0772131	0.0318416									10.334	-0.167247	0	0.995572					9.87557	-0.155007	0	0.991917
O75487	GPC4	5	2	1	1.01403	1.02462	0.885078	0.624836	0.458631	0.414189	0.419571	1	1.03274	1.10588	0.934699	0.596565	0.499537	0.489362	0.410406	1	0.99839	1.01955	0.822564	0.56925	0.451185	0.413738	0.352821	1	1.02508	1.15513	0.99388	0.671211	0.583105	0.447732	0.405245	14.0818	-0.102174	0.380295	0.997098	14.2066	-0.124369	0.444022	0.973217	13.4163	-0.09468	0.32325	0.997312	15.8363	-0.0905183
O75489	NDUFS3	15	14	1	1.01964	1.04752	0.815129	0.452066	0.243397	0.1463	0.0776254	1	1.01873	0.962829	0.839191	0.463443	0.236133	0.142196	0.114642	1	0.991998	0.97602	0.801532	0.451528	0.232939	0.125497	0.0681741	1	0.960923	0.954684	0.76984	0.419024	0.239028	0.135235	0.102056	11.6087	-0.12792	0.000824226	0.99689	11.6546	-0.134569	0.0438531	0.998675	11.4799	-0.13003	0	0.999321	11.2196	-0.123369
O75494	SRSF10	4		1	1.00996	0.878508	0.748996	0.390527	0.27558	0.302185	0.28639									1	0.895016	0.936327	0.658041	0.3616	0.264785	0.263965	0.289149									10.671	-0.162616	0.266921	0.980237					10.1423	-0.155165	0.244583	0.979934
O75496	GMNN	4	2	1	0.99218	0.978105	0.845373	0.554042	0.506395	0.651697	1.10959	1	1.15212	0.981864	0.88956	0.657655	0.480881	0.576137	0.895025	1	1.04222	1.03629	0.897437	0.62328	0.499288	0.663277	1.05301	1	1.02704	1.11756	0.948644	0.794362	0.65794	0.840925	0.936633		-0.781548	0.705431	0.377236		-0.250902	0.652218	0.690152		-1.00417	0.709714	0.495875		-0.456927
O75503	CLN5	12	8	1	0.957539	1.05062	0.917888	0.648487	0.633376	0.812461	0.68286	1	1.06825	1.00748	0.915951	0.677681	0.703667	0.759194	0.498386	1	0.956187	0.969107	0.861035	0.642539	0.624392	0.738941	0.558804	1	1.017	1.03385	1.03275	0.804005	0.740887	0.616381	0.341627		-0.804984	0.694296	0.875308		-0.0437797	0.481917	0.853172		-0.229412	0.640782	0.908864	18.8343	-0.0617958
O75506	HSBP1	2	3	1	1.82393	1.68345	1.64422	1.05032	1.65508	2.01154	2.97208	1	1.53345	1.75158	1.63561	1.20302	1.02729	1.69687	2.49793	1	0.880654	1.0798	1.25518	0.653159	0.913892	1.1571	1.09125	1	1.03167	2.06127	1.59749	2.36879	2.55171	2.1799	4.14367			1.5	-0.0656928			1.5	0.141248		0.039588	1.12091	0.110035		2.02943
O75509	TNFRSF21	7	2	1	0.974143	1.08145	0.946182	0.628325	0.57222	0.673748	0.743243	1	1.00891	1.05952	0.909297	0.54621	0.500249	0.616435	0.548015	1	0.942929	1.00868	0.875847	0.622109	0.542945	0.654399	0.54768	1	1.02409	1.09081	0.909195	0.701216	0.605653	0.611866	0.48078		-0.93085	0.654384	0.913331		-1.11946	0.552727	0.974317		-0.136736	0.581307	0.959658		-0.0677188
O75521	ECI2	25	23	1	0.969011	0.985636	0.875985	0.612134	0.600297	0.850245	1.12807	1	0.920932	1.0209	0.897979	0.642791	0.66387	0.827358	0.953445	1	0.974005	0.994785	0.87908	0.631397	0.617939	0.854068	1.05531	1	0.979453	1.06548	0.920688	0.756424	0.72975	0.83387	0.755043		-0.522027	0.797688	0.241552		-0.587464	0.771866	0.512631		-0.534426	0.789677	0.344189		-0.610334
O75525	KHDRBS3	3	1	1	0.985236	1.03974	0.854623	0.553813	0.351843	0.131036	0.0488103	1	1.03324	1.06427	0.884139	0.532463	0.331694	0.182995	0.0140166	1	0.97107	0.924256	0.792786	0.514642	0.325544	0.165606	0.0874804	1	1.09516	1.05674	0.878873	0.504585	0.285752	0.155976	0.0517557	12.4932	-0.121554	0	0.990511	12.4701	-0.123855	0	0.986982	11.97	-0.109987	0	0.990808	12.1795	-0.128245
O75526	RBMXL2		2									1	1.08282	1.07562	0.885923	0.547034	0.404402	0.472951	0.373266									1	1.03719	0.915944	0.828426	0.519496	0.469627	0.420521	0.368411					12.6716	-0.138432	0.401407	0.972734					13.1324	-0.0999534
O75528	TADA3	6	4	1	1.02544	1.09819	0.864033	0.45508	0.318128	0.254662	0.371014	1	1.11776	1.06432	0.888954	0.502072	0.28677	0.190183	0.19096	1	1.05858	1.01412	0.812619	0.433565	0.281558	0.228271	0.160971	1	1.09396	1.07059	0.90489	0.537195	0.301456	0.241476	0.186978	11.4057	-0.174026	0.302699	0.979457	12.0165	-0.14363	0.149449	0.983742	11.435	-0.135429	0.142355	0.995301	12.327	-0.136917
O75529	TAF5L	1		1	1.10629	1.11011	0.844184	0.437411	0.511131	0.27032	0.113646									1	1.05697	1.25947	0.762393	0.529887	0.306534	0.122475	0									12.7641	-0.0921611	0	0.935293					11.9157	-0.125882	0	0.9374
O75530-2	EED		12									1	0.979171	0.981184	0.785104	0.498172	0.304666	0.155206	0.103421									1	1.01634	1.02003	0.836862	0.526585	0.27773	0.130328	0.0897143					11.8316	-0.112432	0	0.997522					12.1026	-0.123486
O75530	EED	17		1	0.983776	0.89482	0.745417	0.476138	0.297192	0.151539	0.0333755									1	1.03247	0.996536	0.837	0.527468	0.329763	0.14836	0.0496418									11.3991	-0.115841	0	0.982737					12.2378	-0.119605	0	0.993421
O75531	BANF1	15	18	1	1.43479	1.95793	1.85084	1.41096	1.30725	2.11141	3.21931	1	1.03679	1.44492	1.39537	1.11413	1.25435	1.51473	1.70512	1	1.34752	1.78617	1.77909	1.31958	1.33835	2.19206	2.71783	1	1.38424	1.67229	1.44509	1.56458	1.42478	1.54129	1.98498			1.5	-0.121841		1.4588	1.5	0.0568425			1.5	-0.000355156
O75533	SF3B1	82	61	1	1.00349	1.00879	0.833202	0.559287	0.379261	0.177898	0.0652507	1	0.89794	0.899914	0.808117	0.564276	0.353487	0.123176	0.0545206	1	1.00454	0.97929	0.833063	0.562195	0.378334	0.172861	0.0697791	1	0.980274	0.995284	0.81791	0.584464	0.309692	0.11959	0.0676343	12.5857	-0.110195	0	0.990792	12.3196	-0.115718	0	0.965857	12.584	-0.110028	0	0.991017	12.3919	-0.121538
O75534	CSDE1	95	74	1	0.980532	0.953374	0.819632	0.558784	0.345722	0.143582	0.0579673	1	0.872004	0.927892	0.812957	0.567277	0.330296	0.105528	0.0548962	1	0.999909	0.974357	0.843204	0.579391	0.356751	0.15127	0.0684434	1	0.98504	1.03289	0.833174	0.595345	0.277186	0.116073	0.0628812	12.3614	-0.115633	0	0.989121	12.2934	-0.120831	0	0.966574	12.6238	-0.115456	0	0.992574	12.436	-0.128719
O75554	WBP4	11	10	1	0.932256	0.937054	0.840945	0.563385	0.565806	0.859353	1.25948	1	0.964494	1.04765	0.907312	0.609362	0.603388	0.800121	0.982498	1	1.05354	0.987964	0.904637	0.625389	0.620352	0.892676	1.31481	1	0.93563	1.01698	0.917414	0.697199	0.628778	0.77121	0.837189		-0.12742	0.817579	0.0941777		-0.6045	0.748842	0.528698		-0.361295	0.863307	0.106985		-0.702755
O75564	JRK	1		1	0.934144	1.00177	0.778979	0.384949	0.175182	0.140315	0.072621									1	0.976001	0.982983	0.788738	0.384134	0.236591	0.134435	0.129926									10.9696	-0.147907	0.0356265	0.995415					11.0329	-0.146244	0.0835984	0.998591
O75569	PRKRA	16	12	1	1.05402	1.03926	0.871825	0.492319	0.325189	0.279686	0.147706	1	0.955659	0.989144	0.795489	0.489276	0.328142	0.227411	0.0832249	1	0.997273	0.956332	0.782594	0.45853	0.309596	0.249635	0.140696	1	0.991379	0.954495	0.767892	0.554309	0.346144	0.22502	0.100153	12.1677	-0.122462	0.137697	0.989741	11.992	-0.106313	0	0.9926	11.7605	-0.102859	0.0212604	0.996747	12.2217	-0.0999866
O75570	MTRF1	2	1	1	0.916157	1.04627	0.730413	0.512228	0.284337	0.265503	0.173284	1	1.18475	1.18529	1.09907	0.53834	0.231195	0.158317	0.293275	1	1.14581	1.13739	0.874856	0.508346	0.263807	0.236051	0.206038	1	1.12681	1.06659	1.18031	0.58542	0.389504	0.569431	0.364028	11.7363	-0.104532	0.0738291	0.981565	12.0688	-0.611213	0.227489	0.938597	11.9438	-0.14573	0.177755	0.96506	12.1182	-1.31697
O75575	CRCP	1	1	1	1.00626	0.811416	0.648477	0.494743	0.45989	0.749749	0.985168	1	1.03589	0.964045	0.711884	0.524472	0.509429	0.739322	0.985866	1	1.11527	0.882304	0.859053	0.593614	0.509966	0.816411	1.19381	1	1.09486	0.987601	0.811286	0.599343	0.645323	0.827484	0.872746		-0.860721	0.667606	0.473517		-0.189254	0.693109	0.538222		-0.10341	0.793354	0.236609		-0.659449
O75581	LRP6	1	4	1	0.830784	0.990101	0.92849	0.415436	0.310428	0.290833	0.172999	1	0.884583	0.838346	0.832904	0.567432	0.46651	0.462375	0.529764	1	1.00135	0.806981	0.702467	0.428609	0.252375	0.182819	0.0963636	1	0.922551	0.939875	0.754397	0.585702	0.439041	0.486811	0.474686	11.4823	-0.193788	0.236305	0.957335	17.4489	-0.0546975	0	0.877105	10.6132	-0.107267	0	0.975188	14.9595	-0.0864535
O75582	RPS6KA5	20	10	1	0.996028	0.996246	0.81205	0.435521	0.198183	0.127897	0.123889	1	1.03953	1.00279	0.770431	0.443302	0.207526	0.149995	0.112717	1	0.974951	0.975991	0.771523	0.425839	0.20108	0.134391	0.116237	1	1.00828	0.9636	0.791906	0.40968	0.21525	0.160022	0.109771	11.3182	-0.144818	0.0590289	0.999154	11.2643	-0.12917	0.0276776	0.997593	11.1509	-0.133485	0.0327769	0.998547	11.1686	-0.138477
O75586	MED6	6	4	1	0.778837	0.994805	0.827695	0.511608	0.37084	0.235478	0.0879968	1	0.845688	1.03593	0.891007	0.560581	0.395927	0.172242	0.0196969	1	0.888743	0.797377	0.677513	0.482262	0.345308	0.193681	0.0774979	1	0.985401	0.969838	0.883443	0.646809	0.321778	0.112848	0.0455714	12.3941	-0.103104	0	0.934365	12.8159	-0.118802	0	0.960934	10.7922	-0.0981858	0	0.941236	12.9948	-0.136257
O75592	MYCBP2	29	26	1	1.02304	1.01632	0.765754	0.353914	0.186997	0.195005	0.245609	1	1.00683	1.00309	0.729934	0.336132	0.198542	0.174482	0.187143	1	1.02604	1.00821	0.751743	0.345994	0.181823	0.194841	0.213123	1	1.02328	0.968531	0.700824	0.362482	0.214143	0.184702	0.17071	10.4913	-0.192462	0.196236	0.994962	10.3856	-0.177282	0.1586	0.999341	10.4433	-0.18736	0.17879	0.996942	10.4657	-0.146413
O75600-2	GCAT	12	6	1	1.07986	1.06909	0.854802	0.462157	0.285277	0.231826	0.145907	1	0.956079	1.00274	0.785397	0.511811	0.355232	0.327197	0.179773	1	0.956211	0.950189	0.813878	0.433208	0.270654	0.221494	0.136711	1	0.981358	0.959386	0.758385	0.4628	0.339669	0.265489	0.170002	11.7588	-0.136893	0.135484	0.987956	12.3674	-0.0931042	0.0676384	0.990385	11.4755	-0.128582	0.102188	0.994276	11.8146	-0.0957624
O75604	USP2	1		1	1.18235	1.3526	1.17071	0.608407	0.356922	0.355884	0.625318									1	0.762587	1.06768	0.603725	0.435569	0.295687	0.315508	0.37011									12.1355	-1.41233	0.446041	0.782836					9.85976	-0.190634	0.335841	0.894087
O75607	NPM3	7	9	1	1.0287	0.97423	0.833529	0.597315	0.549461	0.619205	0.51164	1	0.872729	0.968311	0.882445	0.63924	0.566309	0.570727	0.403529	1	1.08819	1.03298	0.904995	0.664606	0.569029	0.63135	0.515743	1	0.972152	1.01607	0.860916	0.753692	0.566358	0.610364	0.353933		-0.126081	0.554862	0.977836	17.802	-0.0598728	0.30201	0.91979		-0.0948928	0.555498	0.958324	18.0592	-0.0512158
O75608	LYPLA1	16	12	1	1.0567	0.996742	0.913642	0.641644	0.596837	0.912608	1.25065	1	1.05297	1.04199	0.895388	0.70606	0.728467	1.00307	1.13983	1	0.986203	1.02779	0.853353	0.67127	0.623483	0.925664	1.12298	1	1.12736	1.16121	1.02908	0.846457	0.918438	0.903386	0.955081		-0.383663	0.850434	0.146255		-0.222343	0.894358	0.187559		-0.325057	0.835849	0.239082		-0.0480901
O75616	ERAL1	12	16	1	1.00586	0.919523	0.774299	0.404624	0.179247	0.0834081	0.0395576	1	0.958572	0.969738	0.781464	0.450031	0.227207	0.127463	0.0945633	1	1.02833	1.01089	0.853077	0.445645	0.190667	0.0869582	0.0633121	1	0.987498	0.982374	0.765021	0.458172	0.21778	0.16539	0.101272	11.014	-0.144852	0	0.994803	11.3803	-0.125925	0	0.99776	11.5574	-0.149358	0.000354956	0.999133	11.3642	-0.120633
O75618-2	DEDD	1		1	1.01796	0.993831	1.02233	0.571065	0.305445	0.136877	0.0258759									1	1.08159	1.0231	0.752068	0.542409	0.25289	0.22719	0.0606274									12.8164	-0.146094	0	0.991666					11.8456	-0.111216	0	0.981539
O75629	CREG1	2	3	1	1.12422	1.31333	1.16756	0.738966	0.579589	0.621995	1.01476	1	0.948371	0.99976	0.833453	0.573774	0.586816	0.789324	0.990959	1	0.961072	1.15852	0.963308	0.546192	0.55985	0.58074	0.706975	1	1.04553	1.10914	0.84886	0.628923	0.769867	0.815467	0.869496		-1.40122	0.73878	0.491955		-0.679482	0.735219	0.466576		-1.14578	0.598439	0.892401		-0.605645
O75635	SERPINB7	1		1	1.16338	0.860631	0.686732	0.569665	0.58686	0.837056	0.984071									1	0.918427	1.0636	0.743985	0.543504	0.494742	0.955727	0.818393										-0.791367	0.732877	0.516714						-0.783389	0.703092	0.490941
O75643	SNRNP200	126	127	1	0.978704	0.97119	0.752827	0.342159	0.100736	0.0498594	0.0544628	1	0.992056	0.962008	0.751893	0.352939	0.117051	0.0783861	0.0789196	1	0.970056	0.92336	0.702456	0.340196	0.107264	0.0567172	0.0562896	1	1.00224	0.966167	0.760305	0.354854	0.133712	0.0947785	0.0822189	10.6013	-0.167787	0	0.997896	10.642	-0.160487	0.0150855	0.997729	10.3483	-0.157252	0	0.994194	10.6943	-0.15998
O75648	TRMU	16	18	1	0.991602	1.02267	0.852888	0.491392	0.266176	0.167381	0.0938495	1	1.00928	1.02476	0.848694	0.481824	0.266102	0.14649	0.0884495	1	0.972434	0.965935	0.809672	0.478389	0.252407	0.1629	0.100161	1	0.983661	1.00209	0.814756	0.444037	0.232923	0.148608	0.114599	11.9827	-0.124902	0.0160064	0.998944	11.9199	-0.125572	0.0016971	0.998898	11.7213	-0.119435	0	0.998584	11.4685	-0.134683
O75663	TIPRL	15	15	1	0.931666	0.990669	0.888531	0.626335	0.536212	0.33534	0.0292299	1	0.869031	0.953643	0.854651	0.62096	0.560407	0.23729	0.0670057	1	1.0213	1.04107	0.882999	0.648001	0.521812	0.306812	0.0482275	1	1.01252	1.07822	0.919921	0.78073	0.47647	0.175316	0.0783401	14.0533	-0.0944645	0	0.943885	13.8166	-0.0956181	0	0.927962	14.0623	-0.0968497	0	0.964841	14.4111	-0.129127
O75665	OFD1	2	1	1	1.04161	1.00333	0.860289	0.452775	0.169223	0.0836081	0.10793	1	1.08733	0.985913	0.89692	0.412155	0.222349	0.199566	0.267683	1	0.979995	1.0149	0.805505	0.448565	0.188027	0.109955	0.11107	1	1.13436	1.4262	1.05948	0.522581	0.28241	0.230357	0.198887	11.5268	-0.16157	0.0426758	0.996837	11.2679	-0.202029	0.216669	0.989028	11.3661	-0.1414	0.0297794	0.997692	12.1174	-0.277334
O75674	TOM1L1	15	17	1	1.00185	1.07632	0.904916	0.636342	0.667972	0.982023	1.35171	1	1.00505	1.04374	0.925307	0.648545	0.689414	0.970809	1.12336	1	0.98118	0.975361	0.881012	0.618375	0.608289	0.866221	1.13326	1	1.03427	1.06748	0.945939	0.795729	0.788227	0.880018	0.925653		-0.275195	0.908593	0.0655778		-0.361113	0.858032	0.211167		-0.511601	0.806535	0.225955		-0.383452
O75676	RPS6KA4	13	7	1	0.99925	0.949337	0.711274	0.322744	0.106476	0.0474151	0.0677921	1	1.03368	1.01229	0.782974	0.361733	0.148086	0.0922048	0.0729109	1	1.02855	0.972504	0.720863	0.338522	0.115245	0.0596876	0.0544359	1	1.04678	0.948349	0.763645	0.349408	0.147888	0.0900012	0.118842	10.3513	-0.162399	0	0.997232	10.8411	-0.16204	0.0293156	0.998733	10.4665	-0.16001	0	0.998185	10.658	-0.165093
O75683	SURF6	7	6	1	1.01874	0.882219	0.636309	0.329686	0.189837	0.163103	0.0774843	1	1.39488	1.32393	1.01276	0.514949	0.414773	0.716932	0.655455	1	1.03537	0.931035	0.678448	0.353034	0.190257	0.181226	0.0942383	1	1.08319	1.02052	1.06767	0.639441	0.626442	0.504181	0.512752	9.96446	-0.124553	0	0.994831		-0.380168	0.575299	0.655509	10.4025	-0.124772	0.00954035	0.995923		-0.239243
O75688-2	PPM1B	1		1	1.10052	1.00896	0.925238	0.526337	0.565609	0.770063	0.975672									1	0.838617	1.09371	0.938552	0.538588	0.555511	0.535907	0.806141										-0.776375	0.70942	0.570274						-1.08026	0.609037	0.747351
O75688	PPM1B	23	15	1	1.00565	1.06132	0.925593	0.607659	0.583722	0.836146	1.13631	1	0.970447	0.954639	0.846309	0.63675	0.687323	0.923733	1.17859	1	0.981982	1.00634	0.866026	0.590214	0.563512	0.776992	1.01795	1	1.0695	1.03485	1.00346	0.848592	0.778217	1.01569	1.11488		-0.562311	0.790959	0.311826		-0.384172	0.854541	0.128349		-0.641621	0.737166	0.464959		-0.0870031
O75689	ADAP1	7	4	1	0.988133	0.966149	0.823758	0.512766	0.476768	0.420498	0.170337	1	0.984777	0.991665	0.968466	0.660884	0.538979	0.553696	0.279475	1	1.09088	0.995687	0.853515	0.582329	0.472528	0.399296	0.190272	1	1.10503	1.03402	0.997604	0.789994	0.57075	0.379816	0.189979	13.4387	-0.0759186	0	0.962938	16.3014	-0.0621719	0	0.946776	13.9348	-0.0765682	0	0.97359	15.7121	-0.0901041
O75691	UTP20	15	8	1	1.053	0.984439	0.726712	0.31711	0.141936	0.110168	0.127094	1	1.01787	0.964324	0.718884	0.337125	0.169451	0.179258	0.160708	1	0.944051	0.916544	0.651891	0.291534	0.132007	0.102431	0.0971031	1	1.00552	0.886683	0.702035	0.338985	0.224702	0.180664	0.142351	10.3521	-0.175781	0.0840048	0.996769	10.3605	-0.169411	0.132995	0.997663	9.9487	-0.149564	0.0207685	0.993551	10.4373	-0.120291
O75694	NUP155	41	48	1	1.00339	0.806834	0.726337	0.447318	0.200791	0.0936554	0.0791359	1	0.921578	0.934908	0.794558	0.443	0.156183	0.0539155	0.0490272	1	1.12285	1.10409	0.955549	0.515101	0.223464	0.119649	0.08541	1	0.975796	1.00421	0.742998	0.330697	0.142785	0.0629325	0.042543	10.8367	-0.123914	0	0.967641	11.2243	-0.151434	0	0.988575	12.1495	-0.173039	0.0682567	0.98172	10.5836	-0.160707
O75695	RP2	9	7	1	0.994021	0.976312	0.849336	0.589255	0.485857	0.515527	0.330601	1	1.02973	1.02146	0.902284	0.627568	0.546178	0.520141	0.250716	1	0.982308	1.03587	0.871614	0.588359	0.50177	0.517496	0.318701	1	1.07655	1.07328	0.98227	0.727432	0.633788	0.451977	0.205541	14.8146	-0.0753736	0.288742	0.974175	15.6562	-0.0638302	0	0.956547	14.6888	-0.0824967	0.327532	0.966183	16.1591	-0.0768219
O75717	WDHD1	54	47	1	0.947174	0.994903	0.840429	0.454698	0.18225	0.0962378	0.110391	1	0.937074	0.982062	0.825935	0.470692	0.200024	0.110667	0.100671	1	1.00316	1.00402	0.842847	0.46082	0.201407	0.115601	0.0987904	1	0.971486	0.96845	0.820159	0.465357	0.203816	0.118503	0.103712	11.4952	-0.15102	0.0380031	0.995903	11.5846	-0.137243	0.012111	0.995114	11.5858	-0.144516	0.0323694	0.999477	11.5437	-0.135176
O75718	CRTAP	11	7	1	1.00463	0.978864	0.844216	0.449601	0.174944	0.0565579	0.0472799	1	1.07386	1.02375	0.831729	0.45583	0.174119	0.0556724	0.0423031	1	0.988828	0.938364	0.827202	0.42065	0.180104	0.0711067	0.0395044	1	1.06096	0.998138	0.85945	0.412102	0.153713	0.0781989	0.0641041	11.4973	-0.156474	0	0.998642	11.4821	-0.155303	0	0.994038	11.3113	-0.1529	0	0.996775	11.3435	-0.168182
O75746	SLC25A12	24	17	1	0.981108	1.00444	0.810955	0.446279	0.250111	0.205764	0.34886	1	1.01635	0.997691	0.812866	0.41956	0.17443	0.0815533	0.0567998	1	0.952736	0.947264	0.733113	0.424624	0.243094	0.213197	0.215728	1	0.988107	0.920273	0.7293	0.386502	0.158847	0.0819911	0.0568564	11.1367	-0.1645	0.251595	0.982148	11.2606	-0.14942	0	0.999494	10.9431	-0.128946	0.145044	0.994139	10.6985	-0.142804
O75752	B3GALNT1	2	1	1	1.00787	1.13525	0.936897	0.489957	0.421175	0.306498	0.29406	1	0.686913	0.790298	0.624807	0.319948	0.297481	0.391684	0.131322	1	0.973215	0.961847	0.948645	0.51653	0.364887	0.320675	0.189672	1	0.692344	0.876053	0.661417	0.430889	0.216058	0.157575	0.13123	12.1286	-0.159655	0.312493	0.972196	9.71746	-0.0963029	0	0.778184	12.4255	-0.140686	0.229625	0.986742	10.4895	-0.11136
O75771-8	RAD51D	2	2	1	0.961136	0.813214	0.657859	0.378285	0.148471	0.0777524	0.0414865	1	1.20429	1.24644	0.908583	0.53228	0.246838	0.241663	0.178215	1	1.17305	1.03504	0.906875	0.470411	0.194383	0.107145	0.0451931	1	1.08258	0.896017	0.674625	0.420995	0.305011	0.146695	0.107951	10.0509	-0.13399	0	0.972715	12.1411	-0.156094	0.168303	0.924994	11.8334	-0.160286	0.0169377	0.978924	10.7471	-0.108596
O75781	PALM	6	5	1	1.00546	1.07439	0.946746	0.613107	0.608561	0.832163	1.04068	1	0.972125	1.00615	0.887977	0.720194	0.675138	0.819411	1.07124	1	1.0017	1.02608	0.939111	0.645293	0.5942	0.748472	0.936963	1	0.994178	1.10098	0.952659	0.739148	0.808897	0.854922	0.908398		-0.611623	0.773627	0.454896		-0.453069	0.821495	0.345877		-0.761456	0.731232	0.666994		-0.413495
O75787	ATP6AP2	11	6	1	0.995116	0.941362	0.83602	0.516412	0.245847	0.127229	0.0556477	1	1.06525	1.04371	0.859438	0.528174	0.263524	0.11043	0.0665691	1	1.0368	0.98505	0.865256	0.506153	0.272295	0.129239	0.0724828	1	0.971684	0.979375	0.832702	0.465832	0.212626	0.116331	0.0423526	11.9415	-0.130444	0	0.995672	12.1364	-0.133002	0	0.993807	12.0774	-0.128991	0	0.998181	11.6196	-0.139533
O75792	RNASEH2A	12	8	1	0.995177	1.08146	0.894412	0.552778	0.337949	0.145769	0.0520133	1	0.872901	0.942041	0.824822	0.546108	0.294305	0.0702236	0.0307199	1	0.935369	0.99721	0.877417	0.543029	0.331083	0.134906	0.0380973	1	0.951555	1.0047	0.835892	0.593148	0.232769	0.0672354	0.022035	12.5984	-0.124965	0	0.990223	12.1194	-0.133104	0	0.971107	12.4478	-0.126216	0	0.990486	12.3283	-0.148404
O75794	CDC123	16	12	1	1.06913	1.01951	0.86044	0.56585	0.383501	0.329583	0.236265	1	0.967968	0.981365	0.800908	0.508462	0.329168	0.232917	0.0993031	1	1.01832	1.04492	0.839295	0.527859	0.35771	0.292164	0.196006	1	1.01371	1.04012	0.842794	0.487449	0.285377	0.165565	0.0717168	12.9357	-0.100784	0.17502	0.991686	12.1309	-0.103969	0	0.995206	12.4752	-0.106142	0.135457	0.994672	11.9919	-0.121989
O75808	CAPN15	3	2	1	1.01136	1.03914	0.914192	0.550246	0.386076	0.225405	0.258971	1	1.25567	1.11926	0.918525	0.695478	0.736992	0.855699	0.857836	1	1.06676	1.02362	0.934625	0.579397	0.368028	0.23289	0.201444	1	1.08089	1.08277	1.00329	0.742863	0.755816	0.787145	0.804294	12.6525	-0.125508	0.202947	0.993365		-0.551371	0.786501	0.599014	12.895	-0.122968	0.14976	0.993642		-0.251012
O75815	BCAR3	8	1	1	0.995421	1.06451	0.855899	0.575111	0.35753	0.139306	0.100869	1	1.72832	1.45138	1.65624	1.28194	1.17839	0.638017	0.88911	1	1.02645	1.01648	0.902914	0.557899	0.321266	0.17455	0.0566129	1	1.06296	1.0002	1.03121	0.565345	0.450404	0.602418	0.563808	12.6693	-0.115287	0	0.991125		-0.0272387	0.723561	-0.357253	12.6312	-0.123134	0	0.996556		-1.05041
O75817	POP7	3	3	1	0.993356	0.927701	0.789227	0.480171	0.389201	0.412043	0.455284	1	0.813275	0.960764	0.816699	0.688616	0.385642	0.376222	0.343412	1	1.02666	0.946025	0.806416	0.508919	0.371931	0.367915	0.376468	1	1.04078	1.04099	1.05283	0.497463	0.437412	0.411108	0.447224	11.3787	-0.170265	0.416017	0.984465	14.1083	-0.0775266	0.161807	0.90712	11.9871	-0.127013	0.343191	0.993115	11.99	-0.659283
O75818	RPP40	9	5	1	0.967375	0.95428	0.790638	0.516506	0.454525	0.596363	0.453216	1	0.985721	1.0397	0.80027	0.565672	0.532905	0.575977	0.420287	1	1.03801	1.01357	0.849502	0.535416	0.515518	0.611629	0.461992	1	1.00349	0.974876	0.889788	0.675797	0.606183	0.633075	0.459256		-0.222007	0.502099	0.957865	19.25	-0.110599	0.49008	0.967424		-0.256078	0.52974	0.969313		-0.052907
O75821	EIF3G	32	42	1	1.00058	0.919581	0.773671	0.399597	0.156566	0.0891089	0.105995	1	0.989688	0.984971	0.82497	0.424311	0.210403	0.174707	0.16558	1	0.994756	0.942247	0.789719	0.401782	0.169132	0.10896	0.114702	1	1.02553	1.02997	0.870169	0.486177	0.268466	0.224645	0.176241	10.9512	-0.144788	0.0160417	0.993515	11.2482	-0.155534	0.127794	0.999085	11.0284	-0.149606	0.0458333	0.996442	11.8488	-0.14239
O75822	EIF3J	13	9	1	0.965093	1.08168	0.865899	0.44464	0.22903	0.210594	0.374527	1	0.996177	0.996291	0.907231	0.500011	0.285997	0.226969	0.333551	1	0.918835	0.929226	0.756866	0.410604	0.225355	0.217131	0.306211	1	1.05088	1.07466	0.89906	0.579034	0.315762	0.263197	0.335597	11.2516	-0.187591	0.264175	0.969705	11.8634	-0.170591	0.261826	0.990807	10.7456	-0.162055	0.228728	0.975236	12.4904	-0.142539
O75828	CBR3	5	1	1	0.993736	1.09207	0.892483	0.528861	0.394035	0.230993	0.122708	1	1.06122	1.32412	1.06534	0.796224	0.624189	0.327046	0	1	1.01239	0.993645	0.891137	0.544086	0.387225	0.22068	0.131515	1	0.985564	0.924719	1.02627	0.877126	0.531179	0	0	12.8622	-0.103259	0	0.984546	15.6089	-0.128516	0	0.890283	12.8726	-0.102865	0	0.996012	15.0717	-0.399267
O75832	PSMD10	11	12	1	1.0247	1.04372	0.881487	0.573071	0.410241	0.399447	0.374755	1	0.902739	0.956363	0.817166	0.527374	0.344539	0.26828	0.17226	1	0.983927	1.00546	0.843662	0.548723	0.402286	0.386828	0.335486	1	0.972867	0.987357	0.777531	0.528978	0.343351	0.296424	0.132225	12.9721	-0.120633	0.359387	0.995061	12.4795	-0.0934435	0	0.985953	12.7209	-0.111857	0.319697	0.998348	12.3311	-0.0933939
O75843	AP1G2	11	10	1	0.985018	0.979909	0.833713	0.507404	0.245418	0.105637	0.0753186	1	1.04541	1.03032	0.867294	0.529591	0.236775	0.0662401	0.0317078	1	1.02452	1.02239	0.874412	0.543127	0.298173	0.115908	0.0696592	1	1.02022	0.99336	0.848152	0.52131	0.221764	0.0636046	0.0526272	11.8846	-0.131547	0	0.998154	12.081	-0.148614	0	0.994696	12.3483	-0.129019	0	0.997042	11.9383	-0.145483
O75844	ZMPSTE24	18	33	1	0.97401	0.901876	0.818582	0.626799	0.584852	0.815681	0.676559	1	1.0025	1.02921	0.867591	0.618314	0.636959	0.719431	0.387305	1	1.05957	1.05934	0.886246	0.681721	0.648143	0.86355	0.672283	1	0.988756	1.03883	0.960029	0.727283	0.677851	0.564502	0.252564		-0.0684221	0.668042	0.770833		-0.0516598	0.356052	0.849001		-0.728055	0.716424	0.827489	17.2942	-0.0637246
O75845	SC5D	1		1	0.996441	0.94402	0.80749	0.468558	0.200553	0.0416598	0									1	1.03828	1.00575	0.747063	0.484921	0.226341	0.0820463	0.0231887									11.4601	-0.151711	0	0.991086					11.3327	-0.133694	0	0.990136
O75864	PPP1R37	4	4	1	1.04371	1.09219	0.947168	0.549002	0.300594	0.227272	0.135594	1	1.14055	1.07278	0.850641	0.43266	0.240853	0.180143	0.132079	1	0.929997	0.92535	0.895765	0.513494	0.306183	0.231414	0.0884462	1	1.0254	1.00639	0.733441	0.407971	0.251115	0.198941	0.106918	12.5015	-0.142826	0.128855	0.988736	11.4734	-0.152033	0.114668	0.979935	12.4151	-0.114376	0.0102982	0.984174	11.0574	-0.122201
O75865-2	TRAPPC6A	1		1	1.12747	1.06477	1.16259	0.625946	0.594241	0.743176	0.534792									1	1.10114	0.996373	0.748464	0.619465	0.514663	0.616966	0.523984										-0.824733	0.62407	0.851019						-0.104028	0.545978	0.953728
O75874	IDH1	50	49	1	0.95732	0.925249	0.808181	0.554288	0.488674	0.577459	0.57834	1	0.961618	0.976029	0.857456	0.601608	0.512292	0.511864	0.465317	1	1.01686	1.01658	0.882321	0.61728	0.507827	0.582058	0.566381	1	0.979165	1.02479	0.877566	0.649658	0.53054	0.481947	0.357401		-0.273496	0.549083	0.958087	16.5175	-0.100339	0.467267	0.993175		-0.131767	0.551517	0.987336	15.7221	-0.0689455
O75879	PET112	11	7	1	1.00187	0.991848	0.754998	0.420773	0.181666	0.0590377	0.0334956	1	0.980374	0.93386	0.720265	0.398298	0.200661	0.111729	0.064793	1	0.952409	0.93934	0.749251	0.413791	0.175659	0.0797863	0.0468838	1	1.00283	0.962896	0.760771	0.39911	0.202246	0.126853	0.0717106	11.0068	-0.146153	0	0.996647	10.7776	-0.131325	0	0.996943	10.932	-0.141865	0	0.99397	11.0187	-0.132869
O75880	SCO1	3	7	1	0.856615	0.967534	0.7822	0.518547	0.244962	0.129841	0.0656047	1	1.00447	0.93509	0.819506	0.473395	0.225111	0.091311	0.0526082	1	0.894552	0.839722	0.731827	0.519571	0.244301	0.135994	0.0809798	1	1.02573	0.981849	0.873732	0.455509	0.232106	0.106047	0.0638856	11.7246	-0.123603	0	0.974407	11.5984	-0.137286	0	0.995372	11.3365	-0.11359	0	0.95667	11.7534	-0.142202
O75882	ATRN	6	9	1	1.06666	0.97169	0.775223	0.551351	0.529855	0.748708	0.843355	1	0.911662	0.998074	0.869972	0.60971	0.595633	0.682665	0.73195	1	1.07284	1.07231	0.912827	0.618211	0.555458	0.733572	0.925819	1	1.00112	1.10504	0.888142	0.714601	0.644709	0.763897	0.662974		-0.809802	0.668317	0.731021		-0.896513	0.65499	0.895997		-0.871403	0.708265	0.683531		-0.116483
O75884	RBBP9	6	7	1	1.19542	0.962351	0.814742	0.652431	0.557661	0.585047	0.227626	1	0.898579	1.02752	0.881935	0.66554	0.583691	0.388048	0.11356	1	1.07849	1.12004	0.911991	0.680643	0.595997	0.738735	0.165519	1	0.945139	0.96777	0.891037	0.703975	0.565908	0.279796	0.100847	15.9514	-0.0584755	0	0.874478	14.8219	-0.0824004	0	0.939737	17.2236	-0.0584937	0	0.787477	14.6193	-0.0969579
O75886	STAM2	9	12	1	0.99312	1.06125	0.950505	0.625357	0.597995	0.815931	0.651584	1	0.832955	1.04094	0.766649	0.54381	0.607926	0.703276	0.375867	1	0.950764	0.950374	0.842788	0.606894	0.554548	0.723718	0.515682	1	0.966876	0.995259	0.846934	0.681883	0.770619	0.772947	0.282817		-0.851987	0.672717	0.870115		-0.982681	0.55772	0.757625		-0.197509	0.59853	0.888378	20.963	-0.0428051
O75896	TUSC2	5	3	1	1.01998	1.13172	0.8977	0.658348	0.722938	0.910522	0.842553	1	0.965069	1.1413	1.00048	0.739687	0.662311	0.888519	0.495541	1	1.0287	1.0885	1.00452	0.733323	0.706971	0.95457	0.657334	1	1.02612	0.983996	1.04787	0.781802	0.776109	0.762645	0.330853		-0.551609	0.78359	0.668833		-0.670903	0.682124	0.687413		-0.633794	0.76305	0.696956	19.9416	-0.0591547
O75907	DGAT1		2									1	0.953857	0.854559	0.745498	0.450056	0.297174	0.232286	0.183698									1	0.964041	0.845557	0.718477	0.44438	0.276856	0.176228	0.163809					11.3238	-0.0954599	0	0.983557					10.9733	-0.102019
O75909-4	CCNK	11	12	1	0.890965	1.00852	0.831719	0.650986	0.549306	0.415497	0.151084	1	1.06565	1.13263	0.968302	0.715748	0.638442	0.427464	0.218549	1	0.961627	0.924797	0.802904	0.6288	0.523686	0.355632	0.128659	1	1.01922	1.02289	1.00043	0.759154	0.516984	0.365335	0.163904	14.5911	-0.074929	0	0.940027	16.0514	-0.0760535	0	0.9493	13.8652	-0.0788703	0	0.955776	15.1972	-0.0929424
O75911	DHRS3	2	4	1	1.03515	1.025	0.8889	0.511709	0.260536	0.135298	0.0333599	1	0.947824	1.01232	0.758194	0.434043	0.235958	0.15463	0.131379	1	1.00695	0.967907	0.824479	0.497719	0.267477	0.133555	0.0485846	1	0.967114	0.973778	0.782824	0.444752	0.2129	0.117507	0.104812	12.1513	-0.137192	0	0.996769	11.2134	-0.126786	0.0472409	0.996459	11.861	-0.127167	0	0.996984	11.3333	-0.128337
O75915	ARL6IP5	9	9	1	1.02307	0.992837	0.843241	0.599272	0.438277	0.289494	0.130104	1	1.15419	1.08501	0.90481	0.577574	0.487359	0.508264	0.487047	1	0.975241	1.0138	0.868708	0.597302	0.434752	0.320458	0.147647	1	1.01086	1.04441	0.936451	0.662639	0.509882	0.514964	0.501262	13.3403	-0.0907291	0	0.990965	15.555	-0.141331	0.488157	0.945858	13.5325	-0.0884724	0	0.991081	19.359	-0.111423
O75923-13	DYSF	5		1	0.947099	1.02694	0.950233	0.578717	0.389847	0.145518	0.049495									1	1.03266	1.02528	0.932524	0.608954	0.408563	0.143738	0.0131596									13.0198	-0.124906	0	0.987641					13.1803	-0.127357	0	0.985643
O75925	PIAS1	6	4	1	0.990984	0.959642	0.804958	0.438326	0.199682	0.122221	0.107311	1	0.77303	0.94751	0.760549	0.461301	0.290622	0.118001	0.00943363	1	0.88491	0.950074	0.747318	0.446629	0.230928	0.0985275	0.0918581	1	0.940704	1.02419	0.816281	0.509559	0.23599	0.0527779	0	11.3373	-0.137415	0.0274318	0.998315	11.4093	-0.125107	0	0.935081	11.1709	-0.125863	0	0.98354	11.7798	-0.146033
O75928	PIAS2	10	5	1	1.04583	1.06842	0.934498	0.570868	0.335848	0.153611	0.0681453	1	0.719254	0.864038	0.745358	0.531577	0.28256	0.113789	0.12852	1	1.00304	1.0286	0.922183	0.531421	0.308976	0.145367	0.0679843	1	0.940868	0.932491	0.672615	0.516978	0.209825	0.137551	0.100569	12.8033	-0.126409	0	0.991998	11.5842	-0.109446	0	0.873297	12.488	-0.128843	0	0.997016	11.019	-0.114169
O75934	BCAS2	6	13	1	1.00402	0.860901	0.661113	0.347453	0.199302	0.177639	0.150503	1	0.999164	0.939359	0.762228	0.439983	0.281146	0.214609	0.231952	1	1.05633	0.964133	0.758829	0.390583	0.235543	0.207256	0.174428	1	1.03954	0.986078	0.77349	0.497831	0.354076	0.250458	0.23506	10.1198	-0.114091	0	0.991533	11.2306	-0.124819	0.157854	0.99618	10.8692	-0.145523	0.144866	0.996009	11.9888	-0.102105
O75935	DCTN3	8	13	1	0.982515	0.954115	0.829479	0.644836	0.611565	0.924457	1.42934	1	0.979674	0.995188	0.880086	0.67878	0.679561	0.954955	1.27806	1	1.02216	0.992011	0.866111	0.683985	0.6533	1.01836	1.31853	1	0.965254	0.996349	0.913449	0.78423	0.771376	0.965747	1.04615		-0.282955	0.887935	0.03617						-0.236117	0.908057	0.055518		-0.269236
O75937	DNAJC8	24	21	1	0.996529	0.994926	0.832545	0.608991	0.554785	0.862497	1.11223	1	0.994802	1.00278	0.877898	0.647956	0.62678	0.814193	0.87488	1	0.987199	1.04201	0.876388	0.629639	0.622772	0.852235	1.03142	1	1.0071	1.01945	0.955723	0.74737	0.733886	0.872109	0.826165		-0.644359	0.784625	0.286221		-0.716028	0.740952	0.718531		-0.597467	0.784016	0.425378		-0.536727
O75940	SMNDC1	11	12	1	0.985275	1.02069	0.851481	0.616934	0.593834	0.870683	1.24263	1	0.914801	1.04872	0.919855	0.651815	0.677265	0.911771	1.18242	1	0.969822	1.02149	0.915457	0.639961	0.58173	0.84344	1.10413	1	1.01463	1.07286	0.97083	0.834354	0.811155	0.97207	1.06104		-0.389742	0.831021	0.161023		-0.364061	0.855818	0.132568		-0.556412	0.792314	0.301837		-0.195479
O75943	RAD17	13	6	1	0.963744	0.992995	0.787863	0.354876	0.13645	0.0701841	0.0796206	1	1.08552	0.991842	0.757587	0.357573	0.106385	0.0595854	0.0692624	1	0.987802	0.955524	0.727654	0.355917	0.134961	0.0784592	0.0825754	1	1.04571	0.931431	0.75388	0.289851	0.141319	0.0632266	0.0560131	10.8106	-0.16772	0.0270679	0.998293	10.6907	-0.16274	0.00061198	0.993096	10.5779	-0.149256	0.00180218	0.997785	10.4455	-0.174261
O75947	ATP5H	39	30	1	0.95312	0.972512	0.83514	0.578932	0.515688	0.642086	0.585171	1	0.992503	0.958963	0.8316	0.640739	0.594796	0.650006	0.596972	1	0.989641	0.989523	0.845519	0.617715	0.53674	0.653442	0.579646	1	1.01684	1.03829	0.878741	0.712963	0.668883	0.65615	0.51345		-1.03025	0.580469	0.961184		-0.117243	0.611106	0.983944		-0.153659	0.591497	0.973625		-0.0486426
O75953-5	DNAJB5	3		1	1.09097	1.16529	0.912901	0.549985	0.303452	0.241957	0.115517									1	0.95652	0.954896	0.80298	0.470424	0.228428	0.183365	0.172113									12.5532	-0.12721	0.0881095	0.967737					11.4898	-0.130814	0.0975314	0.994557
O75954	TSPAN9	1	1	1	1.10158	1.16516	1.00722	0.64165	0.608172	1.02475	1.36389	1	0.912726	0.859509	0.935842	0.60071	0.544868	0.827745	0.984598	1	1.3132	1.3205	1.05754	0.712027	0.84372	1.13594	1.45269	1	0.905674	0.712634	0.982979	0.80443	0.606028	0.850052	0.809757		-0.0886695	0.909713	0.0700327			0.731965	0.235529		0.64396	1.45269	0.304121		-1.09155
O75955	FLOT1	8	5	1	1.00322	0.968912	0.833385	0.475316	0.248964	0.145751	0.0969249	1	0.974597	0.992869	0.769994	0.459948	0.248701	0.187541	0.104029	1	1.0346	1.025	0.839602	0.495141	0.254465	0.149935	0.0979504	1	1.05015	1.0217	0.859822	0.482423	0.231824	0.160234	0.120207	11.778	-0.124807	0.00177004	0.999458	11.497	-0.115296	0	0.998491	11.9237	-0.124824	0.00495983	0.998133	11.7922	-0.140857
O75962	TRIO	35	20	1	1.01039	0.99238	0.824516	0.4506	0.206817	0.102692	0.0852673	1	1.03657	1.00432	0.838053	0.505513	0.2635	0.145893	0.138421	1	1.01661	1.0017	0.834844	0.451163	0.213407	0.114834	0.0916272	1	0.997803	1.05007	0.874066	0.498361	0.268599	0.184678	0.129095	11.511	-0.137863	0.00149117	0.999551	11.945	-0.125045	0.0392529	0.997827	11.5497	-0.140268	0.0213294	0.999594	12.0114	-0.134705
O75964	ATP5L	17	10	1	0.982736	0.957654	0.840824	0.428585	0.203586	0.0995272	0.0485465	1	1.04388	0.987493	0.818102	0.463759	0.192499	0.0749981	0.047803	1	1.00472	0.977451	0.731465	0.451532	0.191754	0.0985192	0.0645309	1	1.07139	0.934623	0.789393	0.456731	0.195523	0.0759594	0.0586686	11.4565	-0.145491	0	0.998356	11.4946	-0.145881	0	0.996824	11.054	-0.132215	0	0.996055	11.3291	-0.139796
O75969	AKAP3	2		1	0.978246	0.966922	0.82208	0.433094	0.351048	0.263823	0.114999									1	1.1005	1.115	0.893815	0.489904	0.350047	0.260266	0.140888									11.9276	-0.105065	0.0355229	0.986955					12.2778	-0.124448	0.133391	0.972618
O75971	SNAPC5	1	1	1	1.01905	1.11651	0.840992	0.470301	0.33529	0.43721	0.491318	1	1.00931	0.988797	0.885207	0.617132	0.516848	0.653249	0.838136	1	1.0112	1.14384	0.866688	0.488534	0.271028	0.490462	0.808988	1	1.10081	1.15952	0.957705	0.667246	0.605758	0.642597	0.883619	11.0537	-0.22071	0.424724	0.959958		-0.910968	0.656341	0.792752		-1.22888	0.514753	0.748118		-0.809972
O75976	CPD	51	38	1	0.981855	0.937614	0.841307	0.595155	0.584695	0.768225	0.871545	1	1.00128	0.98544	0.890634	0.627244	0.667118	0.818919	0.759993	1	1.02703	1.01908	0.882761	0.645893	0.588477	0.786243	0.798392	1	1.04107	1.0144	0.971903	0.74969	0.728837	0.763557	0.64474		-0.812541	0.704905	0.660524		-0.79809	0.718319	0.853782		-0.730641	0.704751	0.832511		-0.0930467
O76003	GLRX3	14	23	1	0.979422	1.03559	0.867657	0.623581	0.652488	0.908402	0.610121	1	0.985785	0.990099	0.884651	0.687497	0.680374	0.795863	0.353911	1	0.987618	1.03228	0.903751	0.633974	0.637698	0.86575	0.450919	1	1.02237	1.07575	0.959036	0.774205	0.761535	0.765592	0.283883		-0.749091	0.698648	0.72559		-0.0403292	0	0.765112		-0.863203	0.647085	0.724434	19.5228	-0.0590587
O76021	RSL1D1	24	16	1	1.00038	0.923025	0.633573	0.259446	0.0920171	0.0330134	0.0249145	1	0.967818	0.877912	0.632156	0.257566	0.088907	0.0418747	0.0375712	1	0.982504	0.879704	0.584879	0.244686	0.0904287	0.0472424	0.0295023	1	1.00397	0.871322	0.627846	0.285997	0.103473	0.0631427	0.0501979	9.7772	-0.173405	0	0.996802	9.7126	-0.167394	0	0.990816	9.40538	-0.164368	0	0.993575	9.72491	-0.153812
O76024	WFS1	20	14	1	0.972635	0.908442	0.825729	0.531472	0.409615	0.344115	0.176226	1	1.02544	1.00134	0.854349	0.565124	0.418506	0.27212	0.105522	1	0.9839	0.990886	0.840221	0.55774	0.420584	0.336267	0.191214	1	1.02928	1.03874	0.903338	0.605018	0.435789	0.265727	0.101866	12.937	-0.0826606	0	0.982406	13.0446	-0.0961088	0	0.989984	13.2803	-0.0831046	0	0.993913	13.48	-0.0997048
O76027	ANXA9	1		1	0.915386	0.692418	0.677703	0.44882	0.308112	0.261086	0.0786696									1	1.28557	1.21349	1.04249	0.709201	0.50086	0.387572	0.973907									9.86636	-0.0970817	0	0.918373						-0.800318	0.62078	0.56436
O76031	CLPX	23	37	1	0.968101	0.939653	0.732814	0.391043	0.126457	0.0323158	0.0209721	1	1.01428	0.966689	0.772718	0.406294	0.150509	0.0690759	0.0539145	1	0.995679	0.970172	0.76601	0.390316	0.14062	0.0462374	0.0281616	1	0.979547	0.914255	0.771472	0.373293	0.154992	0.0897994	0.0558695	10.6828	-0.158317	0	0.992185	10.9853	-0.150545	0	0.997877	10.8698	-0.158743	0	0.99738	10.8528	-0.148736
O76041-2	NEBL	8	5	1	0.961769	0.969342	0.795173	0.498763	0.44277	0.56881	0.613532	1	1.0171	1.03144	0.796452	0.550281	0.551983	0.618121	0.710777	1	0.951767	0.978793	0.823557	0.534222	0.430514	0.535392	0.573061	1	1.05823	1.14292	0.986267	0.700752	0.6827	0.680578	0.801956		-1.3141	0.530969	0.94647		-0.871737	0.60779	0.939364		-0.227147	0.515596	0.96374		-0.85244
O76041	NEBL		5									1	1.09443	1.00784	0.884326	0.55057	0.435486	0.391078	0.421496									1	0.923091	0.912785	0.898703	0.582077	0.429939	0.405543	0.358073					12.7921	-0.132336	0.395517	0.984669					13.2758	-0.113101
O76054	SEC14L2	14	13	1	0.963833	0.981358	0.794819	0.570821	0.535459	0.68745	0.560206	1	0.90628	0.910285	0.825618	0.618017	0.583443	0.596202	0.325489	1	0.961266	1.00005	0.85823	0.572932	0.555856	0.690714	0.470062	1	0.977646	1.02765	0.932499	0.747723	0.679509	0.580671	0.234549		-1.81639	0.588484	0.945237	17.2798	-0.051827	0	0.897378		-0.340523	0.572268	0.920663	17.3398	-0.0646441
O76062	TM7SF2	1		1	1.30595	1.07898	0.965183	0.460093	0.304925	0.206576	0.233957									1	0.99843	1.18546	0.760043	0.391012	0.232035	0.110877	0.097391									11.8036	-0.202365	0.227912	0.923847					11.0212	-0.145538	0.0520462	0.971187
O76064	RNF8	3		1	0.95634	1.14226	0.98444	0.608467	0.507299	0.369367	0.21032									1	0.891876	0.938273	0.7547	0.481782	0.40932	0.307752	0.147787									14.3887	-0.0881688	0.101725	0.952659					12.1835	-0.0869986	0	0.97011
O76070	SNCG	5	8	1	1.00653	0.788004	0.717594	0.535202	0.556773	0.908384	1.19612	1	1.15826	1.07703	0.89192	0.712806	0.829231	1.16206	1.53669	1	1.22806	1.13385	1.01966	0.728149	0.728289	1.14023	1.79414	1	1.05601	1.08845	1.03355	0.862422	0.918927	1.06091	1.25728		-0.550734	0.782815	0.192556			1.10514	0.00535413		0	1.5	0.616322		0.326331
O76071	CIAO1	9	6	1	0.947817	0.966187	0.894472	0.513674	0.331076	0.359564	0.397805	1	0.909769	0.974916	0.840909	0.533854	0.386199	0.341141	0.337294	1	0.999904	0.973617	0.789712	0.52215	0.317003	0.363283	0.40388	1	1.01565	0.986077	0.818444	0.59666	0.355737	0.403068	0.337571	11.9517	-0.163271	0.353801	0.986567	12.4247	-0.11707	0.301753	0.985555	11.7779	-0.132772	0.344106	0.984668	12.9944	-0.09978
O76074	PDE5A	4	3	1	0.957186	0.993321	0.872119	0.55885	0.518336	0.632453	0.506827	1	0.921859	1.01883	0.897557	0.590443	0.615853	0.627285	0.365263	1	1.0299	1.03581	0.872263	0.567532	0.495304	0.615338	0.449769	1	1.18009	1.14341	0.950609	0.833925	0.684204	0.569572	0.326429		-0.254625	0.552972	0.966323	18.4359	-0.0632779	0.36989	0.884773		-0.151113	0.517403	0.961764	18.1466	-0.0634789
O76075	DFFB	3	10	1	1.06328	0.997537	0.913834	0.66766	0.638819	0.793974	0.732466	1	0.769823	0.872281	0.827533	0.63756	0.674765	0.660576	0.365784	1	1.07532	1.08643	1.02959	0.670132	0.657856	0.894561	0.633225	1	0.923535	1.01436	0.817128	0.73255	0.629607	0.67947	0.299653		-0.743967	0.70823	0.902377		-0.0445911	0	0.623811		-0.190998	0.713084	0.782558	18.6995	-0.048496
O76080	ZFAND5	4	4	1	0.972611	0.94245	0.809382	0.514606	0.516758	0.655115	1.05673	1	0.757292	0.905345	0.813491	0.651804	0.747435	0.859268	1.08271	1	1.01765	0.987441	0.900062	0.498912	0.528027	0.785088	0.995461	1	0.977894	1.10063	0.894081	0.819695	0.768548	1.18077	1.19825		-0.603523	0.685802	0.407197		-0.421125	0.830942	-0.164671		-1.02834	0.701872	0.489707		-0.0898138
O76083	PDE9A	2		1	1.03597	1.08896	0.904374	0.578837	0.312077	0.301893	0.226768									1	1.01022	0.92864	0.830853	0.49384	0.333589	0.26539	0.230717									12.6149	-0.131345	0.209794	0.987283					12.0174	-0.115297	0.173237	0.994628
O76094	SRP72	28	37	1	0.986438	0.974412	0.776456	0.359553	0.0924939	0.0282667	0.0270983	1	0.92316	0.913567	0.753407	0.320294	0.0848393	0.0403608	0.0460587	1	0.996097	0.950523	0.802607	0.348184	0.0994523	0.0302641	0.0308371	1	0.957555	0.979171	0.721665	0.275722	0.0964533	0.0483886	0.0424583	10.7442	-0.176187	0	0.997298	10.499	-0.175799	0	0.988999	10.818	-0.18066	0	0.997543	10.2555	-0.180754
O76095	JTB	1	1	1	1.13511	1.13195	0.962159	0.668744	0.573607	0.818001	0.886935	1	0.675553	1.01308	0.976498	0.620197	0.590208	0.613578	0.610699	1	1.01384	1.08323	0.923181	0.685215	0.536007	0.730477	0.964544	1	0.794633	0.997751	0.78971	0.787671	0.495174	0.720207	0.563996		-0.709672	0.736822	0.668494		-0.209009	0.604888	0.604892		-0.714833	0.729061	0.608472		-0.0574112
O77932	DXO	3	2	1	0.963624	0.926648	0.764632	0.546371	0.593286	0.832627	1.16335	1	1.09232	1.21568	1.03155	0.652043	0.6126	0.805229	0.88101	1	1.00076	0.989101	0.855004	0.651092	0.594093	0.85949	1.13819	1	1.18259	1.0993	1.11401	0.779352	0.777845	0.799224	0.687234		-0.602753	0.780053	0.211095		-0.161418	0.737361	0.665152		-0.541932	0.810716	0.248742		-0.270948
O94759	TRPM2	1		1	0.77629	0.980348	0.733725	0.598261	0.341136	0.154459	0.290608									1	0.700615	1.0598	0.894176	0.372707	0.219524	0.172446	0									12.345	-0.0897082	0.0132176	0.892902					11.3751	-0.168315	0.0520638	0.908945
O94760	DDAH1	18	18	1	0.956504	0.933811	0.830889	0.637784	0.605074	0.870335	1.05593	1	1.03889	1.00845	0.883387	0.718947	0.745597	0.941993	0.986032	1	0.97288	0.988566	0.851941	0.660189	0.640551	0.886165	1.01054	1	0.980344	0.996927	0.930666	0.787264	0.777792	0.877439	0.712287		-0.108858	0.799084	0.268725		-0.338996	0.848142	0.461928		-0.475205	0.799362	0.38324
O94761	RECQL4	17	10	1	0.998465	1.03381	0.821512	0.478231	0.304514	0.263442	0.267842	1	0.959478	1.01496	0.852235	0.537307	0.317773	0.235068	0.182971	1	0.976176	0.996341	0.805985	0.443261	0.286922	0.229086	0.209463	1	0.983404	0.944985	0.793332	0.493588	0.347298	0.204656	0.17916	11.631	-0.13725	0.23089	0.997658	12.3537	-0.114332	0.105748	0.997618	11.4071	-0.136727	0.176145	0.999366	12.076	-0.0974798
O94762	RECQL5	11	8	1	0.934686	1.03405	0.825366	0.371981	0.154499	0.0987585	0.107076	1	0.931678	0.913097	0.714399	0.361831	0.120995	0.0666764	0.0832501	1	0.94526	0.943748	0.783519	0.377005	0.155376	0.111225	0.107921	1	0.959054	1.01363	0.795277	0.390607	0.172154	0.0971534	0.0630132	10.9951	-0.175759	0.0683925	0.994995	10.4858	-0.148658	0	0.988734	10.872	-0.157769	0.0536415	0.994222	11.0714	-0.149945
O94763	URI1	13	17	1	1.01348	1.02938	0.898098	0.542961	0.359097	0.255645	0.235832	1	1.02735	1.02688	0.884167	0.514532	0.369702	0.242731	0.134535	1	1.03459	1.05231	0.85713	0.518348	0.339384	0.257249	0.184273	1	1.02098	1.08056	0.977202	0.629694	0.45614	0.281734	0.192873	12.527	-0.124411	0.195497	0.998151	12.6158	-0.106935	0.044534	0.99321	12.3225	-0.11571	0.134285	0.994492	13.892	-0.101241
O94766	B3GAT3	6	9	1	1.00899	1.08257	0.933681	0.571367	0.41175	0.345421	0.227901	1	1.06303	1.01074	0.816401	0.524149	0.368842	0.239262	0.136115	1	0.937826	0.998125	0.835525	0.540227	0.366482	0.290799	0.184429	1	0.990203	0.988558	0.875536	0.580692	0.380538	0.221315	0.142903	13.1313	-0.11326	0.224609	0.984928	12.4743	-0.0982092	0	0.993089	12.6999	-0.0957211	0.0609935	0.993103	12.9977	-0.101272
O94768	STK17B		2									1	1.28289	1.05668	0.902588	0.60734	0.358352	0.239668	0.228488									1	1.00294	0.927351	0.856612	0.4408	0.255053	0.209679	0.063293					12.9875	-0.117037	0.153694	0.927281					11.7189	-0.12807
O94776	MTA2	39	29	1	0.988294	0.99476	0.836292	0.555009	0.462504	0.433367	0.222197	1	0.983913	0.983099	0.861903	0.587579	0.495956	0.413399	0.145298	1	1.00162	0.977706	0.853674	0.569115	0.457659	0.421092	0.204776	1	0.999307	1.02322	0.899511	0.670452	0.526767	0.365336	0.135834	13.9221	-0.0724332	0	0.977464	14.0233	-0.0780407	0	0.96688	13.9123	-0.074638	0	0.979793	14.574	-0.0850572
O94782	USP1	5	5	1	1.06825	1.02021	0.900562	0.559266	0.402128	0.344425	0.261536	1	1.01949	1.00282	0.895856	0.52637	0.375716	0.241423	0.201294	1	0.982679	1.03822	0.912975	0.585194	0.396289	0.281482	0.234833	1	0.992116	1.03042	0.917215	0.595368	0.404989	0.23109	0.143373	12.9165	-0.113085	0.248368	0.990964	12.5613	-0.116601	0.147977	0.996826	13.0876	-0.11087	0.178567	0.996871	13.3233	-0.101787
O94804	STK10	32	31	1	0.974528	0.95735	0.813808	0.601561	0.517851	0.663687	0.351782	1	1.03338	1.03587	0.887147	0.649344	0.599525	0.6552	0.166784	1	1.02171	1.00618	0.908981	0.624748	0.558769	0.665333	0.334231	1	1.02571	1.05016	0.952207	0.711385	0.709904	0.637854	0.156729	17.6806	-0.0564216	0.229839	0.889989	16.4583	-0.0605149	0	0.850985	17.7964	-0.0564272	0.224902	0.890897	17.3109	-0.0685311
O94808	GFPT2	11	7	1	0.994615	1.11469	0.893263	0.486094	0.231031	0.175645	0.0998727	1	0.951684	0.952721	0.857533	0.463591	0.225983	0.16486	0.133633	1	1.01089	1.0187	0.865366	0.441722	0.23006	0.137668	0.104041	1	0.919738	1.06534	0.770728	0.454271	0.243476	0.149418	0.0796744	11.9039	-0.150538	0.0813054	0.988326	11.6436	-0.145496	0.090069	0.995633	11.5908	-0.150355	0.0683563	0.999363	11.4493	-0.123982
O94811	TPPP	3	3	1	0.876076	1.0532	1.13287	0.657295	0.636093	0.70288	0.629415	1	0.940954	1.00694	0.891912	0.687937	0.704831	0.86749	0.841096	1	1.09246	1.03232	0.933135	0.647662	0.676262	0.733893	0.607069	1	1.12216	1.10054	1.10799	0.853792	0.827208	0.846552	0.677001		-0.689577	0.656129	0.867805		-0.693711	0.775339	0.717157		-0.893624	0.666221	0.931459		-0.0283062
O94817	ATG12	5	5	1	1.00588	1.01752	0.874801	0.578373	0.327073	0.161982	0.0791365	1	0.82787	0.881257	0.73414	0.5635	0.287539	0.103035	0.0445809	1	0.991896	0.97706	0.868325	0.564322	0.337436	0.174581	0.0874655	1	0.966178	0.957369	0.79786	0.608626	0.280201	0.118146	0.0742309	12.6667	-0.119317	0	0.99781	11.7081	-0.116823	0	0.933408	12.6155	-0.114706	0	0.997691	12.3572	-0.121829
O94819	KBTBD11	3	2	1	1.03152	1.09589	0.890929	0.655879	0.493146	0.331369	0.251811	1	0.682064	0.728768	0.628226	0.491165	0.324792	0.283807	0.153914	1	0.876156	0.984667	0.74686	0.58682	0.380386	0.345777	0.147039	1	1.03039	1.03556	0.885345	0.795057	0.444048	0.142246	0	14.4719	-0.0796726	0.0258239	0.983887	9.72927	-0.0930415	0	0.775633	12.7646	-0.0842229	0	0.960366	14.2448	-0.150861
O94822-3	LTN1	2		1	1.02946	0.887451	0.720247	0.321982	0.0888282	0.0185181	0.0078937									1	1.04463	1.00958	0.751197	0.357108	0.106602	0.0480182	0.0362344									10.3391	-0.175336	0	0.988735					10.6577	-0.167076	0	0.9969
O94826	TOMM70A	55	39	1	0.972769	0.995691	0.842906	0.590427	0.428569	0.233494	0.047442	1	0.990252	0.967555	0.827124	0.605219	0.419237	0.151262	0.0248584	1	0.992459	0.978443	0.866334	0.603028	0.434186	0.220611	0.0692273	1	0.969658	1.03203	0.900053	0.681546	0.362	0.134957	0.0446009	13.0375	-0.103681	0	0.980644	12.8958	-0.11397	0	0.975569	13.2066	-0.104394	0	0.986458	13.3644	-0.133769
O94829	IPO13	8	3	1	1.034	0.990048	0.842914	0.4684	0.249846	0.159948	0.0745431	1	1.08602	0.963919	0.838128	0.510627	0.311006	0.23173	0.0951867	1	0.983463	0.984068	0.799482	0.456394	0.257232	0.153759	0.0743379	1	0.989534	0.977537	0.900437	0.556312	0.254014	0.167502	0.128596	11.7993	-0.126534	0	0.998325	12.2344	-0.107978	0	0.98934	11.5758	-0.122928	0	0.998995	12.3479	-0.138734
O94830	DDHD2	10	6	1	1.00341	1.01061	0.891094	0.565228	0.384549	0.244563	0.169239	1	1.06197	1.07323	1.02883	0.557	0.351678	0.289341	0.20719	1	0.97671	1.03481	0.887269	0.567339	0.371063	0.253519	0.151351	1	0.995045	1.00638	0.97957	0.565321	0.385706	0.261195	0.149618	12.994	-0.10203	0.0468271	0.998211	12.4985	-0.183792	0.25192	0.983262	12.9744	-0.102195	0.0303101	0.996146	13.0337	-0.121399
O94832	MYO1D	19	14	1	1.11154	1.09151	0.897762	0.389681	0.166506	0.134227	0.145356	1	1.19902	1.21006	0.896166	0.413134	0.149586	0.1132	0.0902954	1	1.12306	1.18416	0.885934	0.415539	0.175688	0.135418	0.148686	1	1.19353	1.17073	0.895609	0.401053	0.184146	0.113974	0.0941439	11.2617	-0.203262	0.12166	0.984751	11.4158	-0.191214	0.0734478	0.950531	11.3653	-0.187818	0.11757	0.966125	11.384	-0.186223
O94842	TOX4	14	12	1	0.935166	0.948884	0.766569	0.383094	0.236694	0.197527	0.195259	1	0.881616	0.890283	0.693447	0.415381	0.265127	0.208781	0.185127	1	0.973766	0.908523	0.730857	0.389487	0.243223	0.209078	0.208323	1	0.941147	0.86742	0.68353	0.448389	0.300704	0.234262	0.216255	10.8207	-0.153635	0.161983	0.99308	10.8326	-0.101219	0	0.977814	10.7555	-0.13223	0.142551	0.991936	10.9875	-0.0928821
O94851-4	MICAL2	9		1	1.0365	1.07047	0.811732	0.38124	0.18005	0.122395	0.115617									1	1.01056	0.98359	0.755516	0.369589	0.175323	0.130372	0.113076									11.0113	-0.166507	0.0821147	0.994659					10.7557	-0.152504	0.0654183	0.999529
O94851	MICAL2		3									1	0.923133	0.987686	0.85158	0.424723	0.273104	0.18686	0.202279									1	1.01701	0.933425	0.784775	0.407172	0.265929	0.234296	0.181447					11.3834	-0.157824	0.173318	0.992704					11.1158	-0.138782
O94854	KIAA0754	5	5	1	1.02583	1.03902	0.806142	0.471314	0.262147	0.126491	0.0816866	1	0.971311	1.03094	0.850081	0.450521	0.26018	0.150924	0.153135	1	1.02057	1.02992	0.859202	0.474916	0.231574	0.140715	0.10601	1	0.986394	1.05833	0.904152	0.490501	0.264445	0.165105	0.13712	11.6803	-0.12559	0	0.996798	11.6043	-0.143973	0.104113	0.997459	11.7674	-0.140922	0.0498636	0.998717	11.9839	-0.149523
O94855-2	SEC24D	27	23	1	0.986202	0.962256	0.841637	0.594474	0.5363	0.432375	0.119143	1	0.96833	0.942396	0.863799	0.652721	0.574108	0.275371	0.0593223	1	1.03821	1.00368	0.900781	0.628161	0.548784	0.391255	0.120369	1	0.995403	1.02611	0.917128	0.686814	0.544163	0.225638	0.0730472	14.1713	-0.0759628	0	0.944371	14.2024	-0.095115	0	0.946841	14.5038	-0.0820372	0	0.96279	14.3117	-0.106842
O94864	SUPT7L	1	2	1	0.865903	0.878709	0.778346	0.404979	0.43094	0.543574	0.514232	1	1.24386	1.25511	0.928951	0.628504	0.655609	0.807735	0.891444	1	1.34009	1.25041	1.09514	0.555467	0.448742	0.579141	0.937276	1	0.912426	0.918692	0.81253	0.55013	0.511584	0.588104	0.507495	9.29412	-1.49529	0.473431	0.876234		-0.694402	0.745823	0.562108		-0.184348	0.628367	0.582503		-0.192321
O94868	FCHSD2	5	4	1	1.02114	1.02448	0.829343	0.607867	0.512888	0.384617	0.0312528	1	1.04723	1.00665	0.902748	0.562635	0.470718	0.303705	0.15843	1	1.02841	1.03196	0.865265	0.612568	0.519651	0.426376	0.06931	1	1.02108	0.956944	0.971366	0.682913	0.495994	0.235791	0.191353	13.7672	-0.0874193	0	0.938958	13.5874	-0.0883124	0	0.984663	14.167	-0.0829569	0	0.941679	14.3426	-0.0969817
O94874	UFL1	42	33	1	0.980502	0.972628	0.779835	0.39858	0.138021	0.0591529	0.0611052	1	0.963066	0.931754	0.751491	0.374061	0.133966	0.0672285	0.0516854	1	0.995232	0.955236	0.764174	0.395398	0.14979	0.0749117	0.0684752	1	1.00964	0.958743	0.73507	0.36703	0.140184	0.0857479	0.0636211	10.9689	-0.155161	0	0.997693	10.7336	-0.153666	0	0.994922	10.9049	-0.148097	0	0.99772	10.6613	-0.148549
O94876	TMCC1	1	1	1	0.772727	0.93185	0.945915	0.469613	0.342126	0.518166	0.632355	1	1.14935	1.1265	0.955133	0.630953	0.468172	0.583718	0.557764	1	0.924397	0.92292	0.942953	0.495133	0.371912	0.463408	0.484342	1	0.96839	0.91991	0.867174	0.645734	0.468686	0.393652	0.158483	9.52623	-1.5036	0.490565	0.76736		-0.151622	0.536621	0.912376	11.7764	-0.225573	0.441015	0.961518	14.1694	-0.079649
O94885	SASH1	6	3	1	1.008	1.00555	0.819303	0.539412	0.427769	0.317592	0.258612	1	1.2032	0.981193	1.03689	0.629095	0.395428	0.346112	0.220326	1	0.968943	1.01797	0.860121	0.602499	0.465649	0.339067	0.264165	1	1.07458	1.17427	0.977531	0.805447	0.413659	0.261394	0.121182	12.9314	-0.0904462	0.150488	0.997381	13.2521	-0.144231	0.260189	0.946521	13.8981	-0.0805066	0.0843726	0.995729	14.4062	-0.127301
O94886	TMEM63A	4		1	0.98899	0.967186	0.848288	0.502728	0.38816	0.431794	0.365294									1	1.01992	1.01397	0.829329	0.561988	0.446028	0.396661	0.302408									11.9876	-0.146565	0.380755	0.993729					13.366	-0.0897245	0.251235	0.994937
O94887	FARP2	7	5	1	1.01482	0.885933	0.735439	0.399891	0.239011	0.277163	0.469693	1	1.03652	0.974307	0.721551	0.340684	0.216054	0.249154	0.295929	1	0.96049	0.980621	0.724674	0.399188	0.266179	0.245889	0.307384	1	1.12715	0.96114	0.801446	0.409225	0.275663	0.278318	0.267164	10.2733	-0.217604	0.332423	0.936427	10.1454	-0.21241	0.250187	0.992994	10.5757	-0.162664	0.254433	0.99332	10.9733	-0.167265
O94888	UBXN7	21	13	1	0.999567	0.98677	0.846169	0.601031	0.602393	0.827391	0.873409	1	1.01176	0.982211	0.931917	0.671562	0.671376	0.876754	0.773183	1	0.995261	1.00619	0.87075	0.627205	0.597001	0.851525	0.804784	1	1.05434	1.04862	1.01381	0.77509	0.75107	0.858388	0.691005		-0.58678	0.726056	0.663471		-0.665209	0.748219	0.792302		-0.737364	0.720129	0.737341		-0.494397
O94889	KLHL18	1	2	1	1.23439	1.36641	1.28336	0.624533	0.552768	0.307491	0	1	1.01718	0.939889	0.781742	0.58108	0.412516	0.162305	0	1	0.959313	0.813632	0.732726	0.5062	0.373507	0.26138	0	1	0.90381	0.915819	0.914468	0.550849	0.453205	0.0913149	0	14.5814	-0.11564	0	0.805882	12.5076	-0.110331	0	0.964302	11.5895	-0.0986571	0	0.931721	12.8819	-0.125865
O94898	LRIG2	2	2	1	1.07498	0.999296	0.839662	0.554622	0.309582	0.224081	0.146896	1	0.90583	0.964978	0.851817	0.51355	0.319837	0.211511	0.223745	1	1.01866	0.969311	0.753247	0.491758	0.319049	0.214029	0.147424	1	0.804037	0.832833	0.719176	0.522524	0.342045	0.191832	0.104063	12.4847	-0.105381	0.0132111	0.993849	12.1101	-0.122395	0.151051	0.986754	11.7911	-0.100328	0	0.999138	11.4836	-0.0975588
O94901-9	SUN1	5	4	1	1.08595	1.05471	0.829689	0.506143	0.310815	0.250297	0.307212	1	0.985828	0.998204	0.799868	0.446927	0.242685	0.178715	0.0896755	1	0.908333	0.954152	0.747284	0.446977	0.275999	0.2676	0.18361	1	0.974661	0.966327	0.846837	0.44915	0.252497	0.142791	0.118248	11.8224	-0.134724	0.244215	0.984081	11.521	-0.123445	0.0145856	0.998823	11.3211	-0.113258	0.117586	0.98646	11.6289	-0.137115
O94903	PROSC	19	20	1	0.999123	0.988178	0.894071	0.62872	0.599781	0.642662	0.297764	1	0.980615	1.01759	0.873025	0.65767	0.63444	0.524911	0.175975	1	1.0288	1.02654	0.870314	0.649081	0.606839	0.575608	0.248432	1	1.00537	1.02476	0.907507	0.74849	0.615476	0.378916	0.161097	17.5124	-0.0522952	0	0.896305	15.8991	-0.0658036	0	0.917355	16.4951	-0.0583737	0	0.926002	15.5887	-0.0855471
O94905	ERLIN2	13	16	1	0.968854	0.943954	0.717592	0.365182	0.103163	0.0498749	0.0656685	1	0.961443	0.981004	0.786136	0.369415	0.12321	0.0598469	0.0491776	1	0.976132	0.944583	0.708506	0.345127	0.111556	0.0551542	0.0549023	1	0.985898	0.929328	0.687806	0.314667	0.126483	0.0704628	0.0425189	10.5068	-0.157003	0	0.994011	10.8696	-0.163779	0	0.998003	10.4094	-0.157748	0	0.996272	10.2248	-0.155883
O94906	PRPF6	37	30	1	0.990616	0.889677	0.605752	0.220442	0.0623206	0.044667	0.0439837	1	0.933344	0.888425	0.622315	0.246523	0.0794339	0.0668833	0.0520428	1	1.0346	0.923494	0.632529	0.234255	0.0756508	0.0536822	0.0565184	1	1.01121	0.873662	0.590742	0.226433	0.174443	0.0742978	0.0601474	9.50837	-0.177803	0	0.99347	9.63637	-0.165372	0	0.989548	9.71195	-0.175612	0.000283035	0.995978	9.37732	-0.146251
O94907	DKK1	1		1	1.00437	0.860072	0.783062	0.443514	0.319061	0.45095	0.45396									1	0.982329	0.968957	0.730204	0.418645	0.348236	0.33606	0.458474									10.5665	-0.236879	0.410738	0.940695					10.3314	-0.222923	0.381842	0.982708
O94910	LPHN1	3	3	1	1.02727	0.994884	0.873324	0.446955	0.344361	0.329513	0.2575	1	0.837545	0.920701	0.706067	0.39401	0.25158	0.29647	0.209339	1	1.00984	1.01854	0.771784	0.487361	0.295119	0.298336	0.273762	1	0.872786	0.809448	0.729091	0.408218	0.249646	0.237232	0.123896	11.5506	-0.162565	0.285904	0.996139	10.695	-0.125527	0.175253	0.953744	11.5252	-0.126097	0.234752	0.996181	10.7406	-0.102588
O94913	PCF11	17	15	1	1.023	1.04496	0.864414	0.458543	0.183812	0.118297	0.156994	1	0.999979	1.04737	0.830386	0.448691	0.30767	0.409915	0.47183	1	0.944972	0.956978	0.805042	0.424907	0.179084	0.134991	0.157011	1	1.03949	1.0489	0.911316	0.536134	0.350942	0.412942	0.412318	11.5371	-0.164814	0.095777	0.995077	10.8201	-0.226864	0.399992	0.974769	11.1563	-0.152532	0.0911417	0.992899	12.2489	-0.162469
O94915-2	FRYL	1		1	1.04069	0.977996	0.732944	0.324154	0.0329733	0.00456293	0.00204513									1	0.973377	1.05375	0.700402	0.299466	0.0623501	0.0168023	0.022434									10.3747	-0.19272	0	0.993006					10.2111	-0.186633	0	0.994472
O94915	FRYL	40	28	1	1.02892	0.96305	0.743979	0.309705	0.0946844	0.0625723	0.0750428	1	0.992646	0.958254	0.713129	0.336557	0.134105	0.0974163	0.0987175	1	1.0038	0.960228	0.720552	0.315265	0.10347	0.0764311	0.0775735	1	0.981468	0.906614	0.69056	0.298219	0.13823	0.107576	0.0906924	10.4241	-0.178045	0.0233463	0.997396	10.4114	-0.156346	0.0356396	0.998099	10.3541	-0.168478	0.0226057	0.997994	10.1653	-0.154209
O94916-4	NFAT5		8									1	1.03248	1.14019	0.936341	0.5484	0.313761	0.102494	0.0358959									1	1.00308	1.01438	0.947161	0.630079	0.282707	0.119421	0.0608823					12.5615	-0.140245	0	0.981081					12.9234	-0.144713
O94916-5	NFAT5	12		1	0.967355	1.03612	0.857892	0.507767	0.300058	0.147255	0.0680571									1	0.986485	1.01267	0.849376	0.513847	0.287428	0.149373	0.0684506									12.1562	-0.123648	0	0.995846					12.1201	-0.12363	0	0.998328
O94919	ENDOD1	13	12	1	0.999339	1.13121	0.92964	0.597464	0.510229	0.548417	0.642547	1	0.92874	0.996949	0.854681	0.593053	0.500069	0.492374	0.41182	1	0.965061	0.966062	0.837038	0.554771	0.462241	0.505752	0.497639	1	0.965861	1.0601	0.877616	0.65654	0.533338	0.502291	0.409138		-0.184149	0.568652	0.936233	14.8289	-0.0943717	0.416535	0.982922	14.6244	-0.142535	0.484799	0.989957	16.2105	-0.076532
O94923	GLCE	8	3	1	0.973601	0.980429	0.84047	0.479709	0.288224	0.14591	0.0608972	1	1.17513	1.19294	0.974753	0.595085	0.419855	0.258782	0.174292	1	1.02013	1.00875	0.79921	0.496391	0.283662	0.140769	0.076561	1	1.10047	0.952081	1.02576	0.674698	0.355296	0.203874	0.151852	11.9081	-0.124253	0	0.997053	13.3805	-0.113319	0.117585	0.937172	11.8179	-0.120104	0	0.997327	13.3897	-0.14508
O94925-3	GLS	3	2	1	0.973004	0.800322	0.727809	0.427791	0.228063	0.123283	0.0717104	1	1.17668	1.09383	0.787771	0.454837	0.230194	0.141598	0.088792	1	1.00117	1.05486	0.861509	0.476252	0.210585	0.114812	0.0654744	1	1.05571	1.02517	0.829057	0.442939	0.206109	0.0872087	0.0552444	10.7828	-0.118985	0	0.966952	11.487	-0.128635	0.00824366	0.969793	11.7825	-0.142338	0.00268625	0.997342	11.4855	-0.144529
O94925	GLS	31	24	1	1.04828	0.974282	0.810536	0.485374	0.236301	0.125312	0.114743	1	0.854135	0.905925	0.745822	0.465095	0.218982	0.0832215	0.064247	1	1.02708	1.03154	0.828453	0.483218	0.244034	0.177884	0.100635	1	0.952662	0.924666	0.704753	0.4223	0.191018	0.10433	0.0628093	11.6927	-0.124137	0	0.99662	11.1732	-0.129262	0	0.967268	11.7944	-0.126177	0.029644	0.997478	10.7552	-0.130161
O94927	HAUS5	22	15	1	0.98869	0.891066	0.727346	0.44973	0.230313	0.228728	0.216427	1	1.00314	0.989042	0.800514	0.507018	0.317752	0.290836	0.244749	1	1.06459	1.04841	0.87778	0.480126	0.265566	0.250995	0.247412	1	1.00033	0.948956	0.821957	0.520796	0.340751	0.337159	0.236438	11.0836	-0.106213	0.0641166	0.987231	11.9422	-0.114345	0.192228	0.998923	11.7073	-0.158494	0.22062	0.992299	12.3123	-0.104976
O94941	UBOX5	2	2	1	0.932737	1.10511	0.902289	0.603307	0.533375	0.532464	0.552191	1	1.09055	1.20595	0.981345	0.647786	0.624437	0.687245	0.401953	1	0.899928	1.00492	0.787014	0.561683	0.52556	0.555559	0.435332	1	1.05197	1.12414	1.03427	0.699275	0.70779	0.535149	0.283815		-0.136047	0.535776	0.95949		-0.11632	0.555381	0.825533	17.5879	-0.106891	0.482731	0.954058	17.4309	-0.0643153
O94952	FBXO21	9	7	1	1.04217	1.02775	0.836227	0.486984	0.266632	0.133171	0.131621	1	1.05972	1.01015	0.799179	0.504094	0.224728	0.149203	0.0943626	1	0.947713	0.994966	0.817698	0.439011	0.222237	0.135197	0.110324	1	0.959594	0.900469	0.741313	0.447089	0.215539	0.11946	0.106064	11.847	-0.127691	0.0380841	0.996539	11.7333	-0.12363	0	0.994854	11.428	-0.138227	0.0455672	0.997449	11.0852	-0.121851
O94953	KDM4B	6	2	1	0.986645	0.927655	0.756989	0.402023	0.197804	0.0946409	0.0527099	1	0.991682	0.952084	0.946353	0.443747	0.29519	0.21827	0.0981801	1	1.00877	1.02977	0.857714	0.443368	0.223583	0.0953537	0.0656273	1	1.19422	1.16189	0.97874	0.557942	0.246271	0.299172	0.165387	10.9595	-0.137785	0	0.99597	11.8552	-0.164108	0.141241	0.988177	11.6284	-0.143973	0.00321133	0.998631	12.3046	-0.210227
O94955	RHOBTB3	6	9	1	1.0048	1.04328	0.848509	0.502307	0.29661	0.240141	0.244004	1	1.00947	0.917795	0.731821	0.429476	0.199916	0.164027	0.102116	1	1.06131	1.07483	0.870999	0.478738	0.281044	0.25926	0.217037	1	0.970208	0.954926	0.732931	0.385407	0.204999	0.147319	0.128806	11.894	-0.13496	0.198456	0.996819	10.9807	-0.120012	0	0.995038	11.7587	-0.149679	0.206114	0.990159	10.7822	-0.134747
O94964-2	SOGA1	14	7	1	1.01607	1.02012	0.786224	0.375699	0.171994	0.116543	0.121677	1	1.09071	1.07729	0.81301	0.367636	0.156387	0.0842432	0.0844896	1	0.971627	0.991617	0.739146	0.390552	0.180537	0.114151	0.0959553	1	1.03896	0.982943	0.762447	0.351965	0.173735	0.104776	0.0870931	10.882	-0.16208	0.0758643	0.998708	10.9712	-0.170675	0.0452779	0.989668	10.8391	-0.138373	0.0173007	0.998777	10.7379	-0.155662
O94966-4	USP19	1		1	0.892921	1.05267	0.737052	0.479099	0.362487	0.296393	0.102582									1	1.01584	0.942803	0.780753	0.58376	0.40401	0.226529	0.185828									11.9831	-0.0958701	0	0.965846					12.7291	-0.089071	0	0.992363
O94966-5	USP19	39	28	1	0.960773	0.954587	0.817544	0.545702	0.39024	0.248941	0.131351	1	0.971058	0.985802	0.848952	0.577302	0.426855	0.242669	0.0803966	1	1.01254	0.993378	0.878138	0.596991	0.410627	0.248767	0.131379	1	1.00913	1.05924	0.911607	0.645553	0.400277	0.191745	0.0995642	12.6404	-0.0951252	0	0.992648	13.0236	-0.0999985	0	0.986145	13.2502	-0.0980085	0	0.996727	13.4313	-0.112773
O94967-4	WDR47		9									1	0.995486	1.06228	0.895933	0.622033	0.571453	0.314573	0.0843091									1	1.04148	1.07545	0.95723	0.717235	0.592118	0.278841	0.114575					14.2545	-0.0902911	0	0.95581					14.9597	-0.100489
O94967	WDR47	14		1	1.03751	0.988565	0.853878	0.614008	0.509801	0.484208	0.196607									1	1.0597	1.0614	0.940512	0.627438	0.526293	0.436121	0.187248									14.7179	-0.0690681	0	0.959375					14.8854	-0.0762393	0	0.963232
O94972	TRIM37	5		1	0.991214	1.03771	0.816274	0.43302	0.237236	0.173531	0.144267									1	0.980546	1.00385	0.828788	0.440399	0.244141	0.153622	0.128502									11.3631	-0.14349	0.10533	0.998273					11.4905	-0.139223	0.0767066	0.999504
O94973-2	AP2A2	22	21	1	0.965803	0.999983	0.892037	0.570129	0.440182	0.299556	0.0909455	1	0.964414	0.977171	0.856827	0.592204	0.454551	0.235144	0.0797655	1	0.992648	1.01178	0.870696	0.570942	0.455023	0.280134	0.0953765	1	0.973358	0.994052	0.862718	0.66513	0.426871	0.200653	0.0799558	13.3325	-0.095774	0	0.981962	13.2235	-0.0996345	0	0.981698	13.2861	-0.0950641	0	0.983734	13.5114	-0.108893
O94979-8	SEC31A	48	49	1	0.990408	1.00129	0.86908	0.586359	0.423489	0.339735	0.355669	1	0.975097	0.986412	0.853067	0.58993	0.431921	0.315857	0.218336	1	0.979031	0.981062	0.83015	0.588645	0.413167	0.332209	0.304723	1	1.01044	0.962354	0.898595	0.655699	0.409299	0.278834	0.200821	13.1786	-0.105701	0.299613	0.998382	13.5502	-0.0820798	0	0.997962	13.2626	-0.0893448	0.191818	0.998862	13.7806	-0.0915319
O94985	CLSTN1	11	6	1	1.00092	1.00033	0.848291	0.55121	0.468879	0.375535	0.194524	1	1.08648	1.11194	0.858915	0.607495	0.613317	0.643218	0.429587	1	0.961357	1.00642	0.845926	0.607099	0.490908	0.371147	0.182843	1	1.03777	1.09141	1.08168	0.922916	0.649038	0.591894	0.599567	13.6502	-0.0781252	0	0.98441		-0.0954698	0.535216	0.90115	14.0091	-0.0779971	0	0.983497		-0.120538
O94992	HEXIM1	13	17	1	1.00582	1.07422	0.90921	0.633204	0.638857	0.847315	1.33146	1	1.04913	0.991056	0.862533	0.655823	0.722532	0.94292	1.26526	1	0.983382	1.00655	0.85737	0.60812	0.594439	0.875961	1.12468	1	1.00593	1.0393	0.995381	0.798422	0.784846	0.963721	1.07063		-0.283716	0.86271	0.119249		-0.296817	0.889813	0.109279		-0.501853	0.800801	0.258304		-0.24453
O95049-2	TJP3	5	7	1	0.968362	1.02089	0.780569	0.483467	0.279965	0.128898	0.0752792	1	0.990766	1.05661	0.908251	0.617224	0.465259	0.274101	0.12893	1	1.00479	1.03079	0.856724	0.530739	0.292415	0.181298	0.107897	1	1.02481	1.00278	0.923555	0.700275	0.420452	0.261299	0.138463	11.6587	-0.12109	0	0.995431	13.7433	-0.0952677	0	0.987955	12.3096	-0.115917	0	0.998656	14.0008	-0.102588
O95057	DIRAS1	6	4	1	1.0003	0.979949	0.809558	0.477193	0.246096	0.141691	0.0928849	1	1.05258	1.07718	0.868486	0.472007	0.226662	0.161893	0.11698	1	0.986258	0.982043	0.802658	0.462803	0.237484	0.141689	0.0877689	1	0.938256	0.952519	0.774431	0.422605	0.233407	0.10846	0.0957252	11.6822	-0.123627	0	0.999694	11.7417	-0.148142	0.0820195	0.992568	11.568	-0.125207	0	0.999636	11.2195	-0.127869
O95059	RPP14	3		1	1.03774	0.976486	0.805722	0.486431	0.327156	0.337445	0.322252									1	0.976508	1.09782	0.819463	0.506275	0.361431	0.395569	0.316093									11.6364	-0.135408	0.297624	0.995652					11.9438	-0.132708	0.328652	0.980951
O95067	CCNB2	14	14	1	1.00351	0.961453	0.761674	0.397641	0.166587	0.112944	0.118641	1	0.963186	0.981021	0.752478	0.373899	0.143623	0.112146	0.105526	1	0.993862	0.971105	0.754902	0.395478	0.171351	0.123689	0.109604	1	0.95081	0.938541	0.700485	0.318211	0.148634	0.0927875	0.115251	10.8987	-0.145267	0.042485	0.997598	10.732	-0.154614	0.0458611	0.997166	10.882	-0.142659	0.0384909	0.998642	10.2817	-0.157801
O95070	YIF1A	1	1	1	1.0768	0.998069	0.901311	0.532445	0.25962	0.170684	0.12415	1	1.06317	0.606762	0.970569	0.531254	0.353575	0.229779	0.155551	1	0.895469	0.972094	0.921123	0.47913	0.265687	0.16182	0.151509	1	0.903155	0.903844	1.17514	0.523719	0.302423	0.334624	0.417934	12.2359	-0.139305	0.0750833	0.994839	12.613	-0.132002	0.136998	0.819481	11.9222	-0.160289	0.128655	0.987651	12.018	-1.80039
O95071	UBR5	67	53	1	1.02159	0.991415	0.795397	0.445077	0.179386	0.0803297	0.074885	1	0.988562	0.954039	0.79402	0.426972	0.187815	0.106963	0.0975386	1	1.03174	0.998067	0.806793	0.442281	0.184692	0.0938479	0.0805011	1	1.03326	1.00209	0.813109	0.426137	0.198156	0.103952	0.0894477	11.303	-0.142478	0	0.998017	11.2303	-0.138001	0.0107209	0.997851	11.3598	-0.141021	0	0.998375	11.3227	-0.143084
O95081	AGFG2	2	3	1	0.971985	0.937327	0.935256	0.526359	0.55881	0.878149	1.17376	1	1.10125	1.12177	0.897325	0.591697	0.73523	1.06729	1.27219	1	0.898521	0.991193	0.854808	0.608543	0.581365	0.79479	1.00796	1	1.03763	1.23436	1.16465	0.850806	0.960225	1.0057	1.05464		-0.0651351	0.807085	0.139663		-0.290113	0.912746	0.0937603		-0.636138	0.748164	0.371951		0.0549013
O95104	SCAF4	7	11	1	0.885247	0.961101	0.801289	0.504636	0.358141	0.352907	0.350605	1	0.872135	0.908987	0.847672	0.458272	0.310585	0.283405	0.254194	1	0.950292	0.962241	0.848854	0.527829	0.357829	0.342402	0.334254	1	0.927131	0.973242	0.771849	0.536557	0.365116	0.288546	0.240066	11.9044	-0.125166	0.317911	0.973732	11.5848	-0.145871	0.242378	0.965742	12.225	-0.126528	0.304338	0.993051	12.4422	-0.0894676
O95139	NDUFB6	10	9	1	0.940878	1.07265	0.915932	0.541719	0.409187	0.267596	0.0845535	1	1.09993	1.13557	1.02098	0.679823	0.559874	0.363829	0.128627	1	0.986666	0.960887	0.855451	0.524066	0.399076	0.26882	0.096954	1	1.01611	1.05478	1.01209	0.72337	0.532149	0.233142	0.0973697	13.0754	-0.103208	0	0.976915	15.0056	-0.0916473	0	0.947236	12.7239	-0.0981669	0	0.98764	14.6143	-0.112455
O95140	MFN2	16	20	1	1.01454	1.01788	0.791831	0.401393	0.153494	0.0685605	0.0499345	1	0.93243	0.905107	0.730898	0.38766	0.167051	0.0970049	0.0946011	1	0.948799	0.918997	0.713383	0.371797	0.139382	0.070207	0.0559012	1	0.95998	0.958581	0.722902	0.382441	0.176648	0.111633	0.100759	11.0669	-0.154651	0	0.998752	10.7174	-0.135157	0	0.989007	10.5374	-0.147167	0	0.992333	10.7178	-0.134667
O95147	DUSP14	1	2	1	0.820954	0.803707	0.737797	0.564056	0.523468	0.517147	0.936768	1	0.951473	1.13602	1.04524	0.755033	0.533895	0.413461	0.419091	1	0.86986	0.688719	0.840136	0.483297	0.398955	0.447365	0.886255	1	1.06039	0.992186	0.943979	0.750245	0.4548	0.359671	0.281369			0.489828	0.426128	15.2045	-0.117832	0.401511	0.957416			0.462888	0.442197	14.6101	-0.101629
O95149	SNUPN	2	5	1	1.00805	0.978549	0.869089	0.5811	0.459429	0.211664	0.0937298	1	0.996711	0.991109	0.893843	0.647917	0.391261	0.0927218	0.0354975	1	1.08403	0.989151	0.907189	0.60801	0.43957	0.149629	0.0969068	1	0.983791	1.10946	0.951095	0.688668	0.301111	0.119504	0.0714168	13.1909	-0.100829	0	0.984648	13.2131	-0.13366	0	0.987044	13.2788	-0.112266	0	0.982483	13.2676	-0.147266
O95155-4	UBE4B	30	24	1	0.991561	1.06361	0.884235	0.532787	0.282189	0.119513	0.0765641	1	0.895127	0.954599	0.802331	0.515479	0.256977	0.100893	0.0706809	1	0.938617	0.923511	0.790746	0.48621	0.255783	0.128773	0.0895308	1	0.934128	0.967914	0.78614	0.461376	0.218067	0.0982382	0.064703	12.2979	-0.13118	0	0.995608	11.8031	-0.127049	0	0.983781	11.6181	-0.121161	0	0.990604	11.401	-0.133332
O95158	NXPH4	1		1	1.10335	1.09731	0.866462	0.43492	0.232567	0.102249	0									1	1.11104	1.14645	0.764256	0.412393	0.217277	0.0961199	0.0380165									11.6377	-0.150273	0	0.982973					11.1551	-0.140985	0	0.974164
O95159	ZFPL1	6	6	1	1.00067	1.09996	0.987063	0.603051	0.447215	0.342258	0.132093	1	0.960536	1.04996	0.885107	0.538475	0.507316	0.3508	0.101036	1	0.882664	0.873204	0.7482	0.534919	0.426377	0.320061	0.113583	1	0.949615	0.985174	0.905501	0.757384	0.481264	0.30555	0.101	13.9886	-0.0938512	0	0.969882	13.5983	-0.086924	0	0.956303	12.3384	-0.0845518	0	0.943668	14.5971	-0.102905
O95163	IKBKAP	60	50	1	0.984752	0.961977	0.801862	0.485567	0.220756	0.116093	0.153368	1	0.899693	0.905504	0.77013	0.481259	0.278158	0.173044	0.139897	1	1.00918	0.981499	0.816172	0.488026	0.233135	0.136673	0.132203	1	0.987804	0.971458	0.806309	0.480058	0.239561	0.178674	0.136001	11.5738	-0.128266	0.0348025	0.994381	11.5856	-0.107515	0	0.981914	11.6993	-0.127086	0.0295278	0.998342	11.6482	-0.123165
O95164	UBL3	2	3	1	1.08111	1.00458	0.943695	0.605386	0.627602	1.08029	1.03717	1	1.14261	1.06403	0.980336	0.641495	0.634879	0.656446	0.687039	1	1.08425	1.2212	1.03556	0.804692	0.762929	0.990749	1.25767	1	1.09456	1.21414	1.08634	0.668799	0.752425	0.563068	0.557934		-0.413275	0.837613	0.22951		-0.936601	0.654965	0.919754		-0.0205368	0.956726	0.0201538		-0.274963
O95166	GABARAP	3	1	1	0.987495	1.0031	0.830544	0.643909	0.620661	0.854209	1.40062	1	1.03223	1.10076	0.995573	0.723047	0.753236	1.10701	1.49028	1	0.954345	0.902836	0.79507	0.631533	0.57714	0.858479	1.16232	1	0.88725	1.05671	1.00008	0.887331	0.658342	0.910301	1.00211		-0.467346	0.869989	0.0706212		0.679736	1.49028	0.623774						-0.354788
O95167	NDUFA3	6	4	1	1.18109	1.03882	1.15409	0.635815	0.679416	0.687626	0.695849	1	1.37316	1.39061	1.25994	0.841735	0.818598	0.728216	0.61774	1	1.12836	1.13398	0.809066	0.752052	0.592001	0.632154	0.617263	1	1.12253	1.12321	1.09853	0.953086	0.84166	0.495427	0.514107		-0.194749	0.676055	0.832669		-0.0448433	0.558706	0.415091		-0.0732273	0.605749	0.876793		-1.27348
O95168	NDUFB4	8	4	1	0.991358	1.03044	0.797915	0.404858	0.14863	0.0468648	0.0288062	1	0.939824	0.961717	0.770608	0.461035	0.200943	0.0893548	0.101549	1	0.968678	0.915344	0.712685	0.356049	0.137275	0.053847	0.0281969	1	0.940742	0.891238	0.70911	0.382787	0.179051	0.138815	0.14224	11.0889	-0.161328	0	0.997497	11.2948	-0.131143	0	0.992732	10.4719	-0.154238	0	0.993114	10.5862	-0.121981
O95169	NDUFB8	4	6	1	1.17483	1.43538	1.2814	0.837489	0.759184	0.978261	1.30791	1	1.16834	1.26648	1.05839	0.783158	0.755074	0.778674	0.913155	1	1.10147	1.29867	1.0902	0.764991	0.666502	0.807174	1.08191	1	1.10773	1.21966	1.09173	0.990808	0.806418	0.735945	1.02397						-0.109378	0.806357	0.535954		-0.0958345	0.835625	0.347777		-0.42279
O95178	NDUFB2	1	1	1	1.1397	1.2492	0.943989	0.715934	0.622222	0.674212	0.42885	1	1.11891	1.18643	1.16383	0.877001	0.731575	0.633194	0.669469	1	1.06966	1.07866	1.0709	0.68682	0.63955	0.680535	0.520492	1	1.23193	1.22903	1.06184	0.984894	0.641907	0.367818	0.746318		-0.0607561	0.445931	0.805543		-0.0814457	0.652584	0.781061		-0.288599	0.613455	0.921285		0
O95182	NDUFA7	8	5	1	0.967018	0.941913	0.79394	0.521001	0.353148	0.336176	0.433103	1	0.987784	0.994822	0.879298	0.521528	0.361411	0.303085	0.365222	1	1.02106	0.996259	0.840173	0.553635	0.382997	0.372842	0.42429	1	0.985094	0.983493	0.881207	0.534973	0.419145	0.325038	0.359464	11.9095	-0.129506	0.354093	0.977297	12.135	-0.142606	0.316689	0.995631	12.5158	-0.125731	0.370877	0.992175	12.5467	-0.126409
O95190	OAZ2	1		1	1.01213	0.945678	0.812272	0.583668	0.56139	0.775872	0.910969									1	1.00621	1.07436	0.892863	0.586483	0.54374	0.707383	0.95125										-0.0924005	0.71599	0.592156						-0.811072	0.697214	0.637813
O95197-5	RTN3	1	1	1	1.28853	1.01141	0.895189	0.707683	0.597045	0.600958	0.734367	1	0.548816	0.836051	0.616311	0.583781	0.545477	0.442571	0.345403	1	1.05066	1.10306	0.985932	0.603325	0.449898	0.496829	0.495311	1	0.867278	1.19685	0.577487	0.498721	0.378822	0.497601	0.395792		-0.101538	0.646333	0.759132			0	0.610006	12.2273	-1.23643	0.480679	0.973998	9.56701	-0.30906
O95197	RTN3	5	5	1	0.982708	1.0224	0.883079	0.583614	0.575629	0.661133	0.57863	1	1.01881	1.04372	0.923352	0.608762	0.660524	0.705416	0.598118	1	0.991336	0.994385	0.844651	0.627598	0.570321	0.658005	0.539607	1	1.04048	1.06778	1.01013	0.835261	0.777707	0.740844	0.566353		-1.0391	0.599751	0.980053		-0.880048	0.643205	0.963577		-0.118331	0.585508	0.972669		-0.0354051
O95199	RCBTB2	1		1	0.84234	1.03494	0.766986	0.476802	0.177365	0.09137	0.0725188									1	1.13243	1.17461	0.942438	0.477104	0.170075	0.159095	0.17204									11.3304	-0.137067	0	0.971877					11.8237	-0.220622	0.1459	0.965426
O95202	LETM1	46	55	1	0.959496	0.920777	0.803093	0.563758	0.456261	0.390997	0.115091	1	0.944368	0.940181	0.824248	0.601501	0.476404	0.318863	0.0987632	1	1.06393	1.03747	0.930819	0.647995	0.513496	0.399848	0.129234	1	0.973864	0.992441	0.853518	0.625809	0.448302	0.262756	0.0890017	13.2325	-0.0805303	0	0.957353	13.4309	-0.0872683	0	0.96673	14.5743	-0.0842683	0	0.968197	13.4541	-0.0973686
O95208	EPN2	12	9	1	0.98317	1.02643	0.893332	0.598359	0.573804	0.880131	1.25306	1	0.986875	0.985245	0.866757	0.665797	0.678168	0.985522	1.31565	1	0.962973	1.00197	0.854716	0.621653	0.62493	0.899243	1.18633	1	1.01547	0.986252	0.991757	0.765012	0.841664	1.03584	1.14484		-0.413177	0.826339	0.150996		-0.257623	0.902378	0.048628		-0.357334	0.833038	0.163388		-0.0215368
O95210	STBD1	11	11	1	1.06306	1.01589	0.858986	0.554351	0.399943	0.250755	0.122887	1	1.02982	1.04141	0.901002	0.561581	0.365816	0.218001	0.129753	1	1.06376	1.05684	0.912364	0.579824	0.397509	0.25784	0.143363	1	1.0519	1.07392	0.914132	0.579238	0.35854	0.208652	0.125581	12.9178	-0.0981586	0	0.990778	12.9112	-0.106856	0.00616757	0.995428	13.2594	-0.0999244	0.00608627	0.989158	12.9798	-0.111306
O95214-2	LEPROTL1	1	1	1	1.29163	1.08016	1.09203	0.874241	0.740917	1.03034	1.11558	1	0.435529	0.572192	0.92619	0.556927	0.508358	0.30172	0.270261	1	1.06191	1.30542	1.06854	0.765127	0.649928	0.976797	0.71583	1	1.04285	1.15245	0.778814	0.996085	0.532315	0.551892	0.344247		-0.019176	0.944293	0.0283271	13.5615		0	0.428789		-0.174789	0.775923	0.516143	17.6796	-0.0645481
O95218	ZRANB2	13	11	1	0.975644	0.900612	0.721256	0.369018	0.143656	0.0715	0.077378	1	0.751104	0.795819	0.655312	0.368542	0.155782	0.0634275	0.0717012	1	0.971272	0.941503	0.761024	0.376812	0.158078	0.0880667	0.0811011	1	0.910876	0.926101	0.682672	0.424198	0.157743	0.114759	0.0850227	10.5612	-0.14445	0	0.99189	9.91113	-0.130546	0	0.899536	10.8341	-0.145209	0.00165888	0.996741	10.597	-0.12915
O95219	SNX4	12	10	1	1.01236	0.978034	0.817005	0.50379	0.267713	0.107461	0.0473512	1	1.02532	0.986899	0.831198	0.485027	0.266239	0.160624	0.10988	1	1.04078	1.01274	0.862728	0.523713	0.274602	0.113496	0.0632621	1	1.02025	0.996175	0.940504	0.519466	0.255464	0.143028	0.10421	11.8411	-0.129605	0	0.996013	11.8704	-0.120819	0.0107062	0.999383	12.1479	-0.131604	0	0.997075	12.2165	-0.155585
O95229	ZWINT	10	8	1	1.02382	0.999333	0.915981	0.574165	0.480079	0.505611	0.504504	1	0.967204	1.07978	0.871661	0.609568	0.477672	0.53969	0.562268	1	0.973209	1.02177	0.885001	0.593126	0.505271	0.457853	0.46459	1	0.936767	1.00444	0.983491	0.735638	0.588475	0.525522	0.452097	16.0298	-0.151279	0.493182	0.99691		-0.130805	0.525979	0.968089	14.7054	-0.112502	0.451544	0.996688	18.2802	-0.0806878
O95232	LUC7L3	18	12	1	0.964732	0.874094	0.640116	0.314286	0.137342	0.0711202	0.0356716	1	0.977336	0.898934	0.693548	0.360096	0.181741	0.110463	0.0739995	1	0.966188	0.88228	0.634128	0.303932	0.135148	0.075344	0.0508343	1	1.00938	0.907104	0.740888	0.365928	0.224099	0.129306	0.108296	9.8931	-0.14663	0	0.990249	10.4278	-0.1326	0	0.994424	9.83816	-0.14619	0	0.992609	10.7919	-0.124973
O95235	KIF20A	8	9	1	1.00332	0.975852	0.804125	0.44394	0.185918	0.101558	0.109107	1	1.01594	1.06296	0.873688	0.488428	0.297694	0.193252	0.140956	1	1.02081	1.04205	0.808686	0.459927	0.197338	0.111486	0.0902306	1	0.98977	1.0073	0.887545	0.456193	0.262994	0.208798	0.142175	11.3336	-0.140435	0.0206809	0.997995	12.0252	-0.131531	0.0990853	0.995085	11.4872	-0.136625	0.00465708	0.996916	11.7249	-0.152712
O95239	KIF4A	39	37	1	0.992105	0.925669	0.756895	0.350732	0.104093	0.0741122	0.0836015	1	1.00337	1.00075	0.800061	0.363392	0.123494	0.100415	0.100979	1	1.02081	1.03203	0.833282	0.386961	0.116112	0.0765652	0.0796035	1	1.00632	1.01479	0.797717	0.360582	0.145185	0.0976534	0.0848346	10.6284	-0.163398	0.0157751	0.994028	10.8398	-0.175152	0.0572731	0.998508	11.0852	-0.176972	0.0322861	0.99749	10.8648	-0.169258
O95243	MBD4		1									1	1.07267	1.02894	0.682513	0.391311	0.232099	0.182076	0.0748493									1	1.16476	0.944669	0.841712	0.350722	0.214747	0.140019	0.0731186					10.7605	-0.122475	0.00762891	0.990519					11.0388	-0.169994
O95248-4	SBF1	22	15	1	1.01542	0.977652	0.77605	0.39317	0.16169	0.110721	0.108221	1	0.99798	0.965084	0.769692	0.395491	0.161305	0.143314	0.118036	1	1.01761	1.02532	0.838864	0.410067	0.173681	0.116115	0.103252	1	0.988544	1.00082	0.792183	0.389007	0.178779	0.144791	0.107359	10.9354	-0.151102	0.0445632	0.998478	10.9006	-0.149808	0.0646798	0.997653	11.25	-0.163356	0.0637109	0.998855	10.9887	-0.155173
O95249	GOSR1		3									1	1.0361	0.988355	0.810275	0.477951	0.232712	0.138332	0.133477									1	1.03971	0.9688	0.848864	0.442943	0.245152	0.146374	0.132235					11.6218	-0.12801	0.0358497	0.997626					11.5537	-0.143653
O95251	KAT7	5	6	1	1.03195	1.02398	0.750219	0.412662	0.213497	0.114058	0.0797072	1	0.824855	0.890265	0.767047	0.501103	0.319478	0.271964	0.161062	1	0.951816	0.939091	0.757374	0.399271	0.187959	0.120272	0.0851236	1	0.964277	1.00931	0.720674	0.463646	0.344291	0.216771	0.141501	11.0713	-0.131843	0	0.997728	11.9057	-0.092709	0	0.94592	10.9635	-0.133169	0	0.995702	11.6164	-0.0997004
O95260-2	ATE1		12									1	0.859875	0.913518	0.840729	0.61543	0.63157	0.750794	0.818955									1	0.94219	1.0079	0.86426	0.717985	0.628276	0.855068	0.703018						-0.0708035	0.708533	0.529075						-0.658631
O95260	ATE1	15	1	1	1.00194	1.01522	0.922788	0.620574	0.608066	0.907083	1.17032	1	0.96604	0.834903	0.827063	0.656909	0.824693	0.994588	1.05791	1	0.992511	1.00249	0.896811	0.637223	0.603894	0.836851	1.05079	1	1.00044	1.11792	0.718862	0.746444	0.824478	0.889232	0.82487		-0.488847	0.826512	0.204505		-0.468679	0.866011	0.172515		-0.557664	0.782189	0.386099		-0.844142
O95271	TNKS	7	10	1	1.05451	0.987179	0.856235	0.509923	0.346999	0.216375	0.147195	1	1.02811	1.06677	0.827237	0.48883	0.31891	0.194619	0.139226	1	1.06023	1.0662	0.86224	0.547753	0.340022	0.200653	0.123012	1	1.02592	1.06527	0.880665	0.56713	0.3066	0.180121	0.143618	12.3873	-0.107175	0.0355899	0.995387	12.0329	-0.115504	0.0536178	0.993205	12.6091	-0.108456	0	0.991412	12.5632	-0.120228
O95273	CCNDBP1	6	3	1	1.03069	1.08472	0.956605	0.623858	0.62102	0.581732	0.122473	1	1.01505	1.04514	0.834031	0.683194	0.555095	0.518031	0.246968	1	0.960739	1.01527	0.956044	0.605216	0.55734	0.491927	0.143581	1	0.928612	0.998556	0.950221	0.776144	0.495536	0.414015	0.26557	15.898	-0.0698278	0	0.872213	15.8114	-0.0624114	0	0.956507	15.0621	-0.0747104	0	0.927661	15.4375	-0.0831794
O95279	KCNK5	1		1	1.10473	1.00132	0.994038	0.515418	0.346798	0.218795	0.267478									1	1.00174	1.33415	0.868218	0.471965	0.273032	0.184245	0.0976803									12.186	-0.194423	0.254845	0.983819					11.8904	-0.140294	0.0798471	0.920897
O95292	VAPB	10	17	1	0.98597	0.98774	0.861224	0.597986	0.577053	0.689646	0.41137	1	0.943836	0.976941	0.863097	0.648828	0.650706	0.601434	0.317039	1	1.05137	1.01016	0.923594	0.653745	0.632187	0.734546	0.446162	1	0.982943	0.998655	0.912088	0.787542	0.705761	0.572508	0.308926		-0.101865	0.53806	0.891996	17.8531	-0.0508903	0	0.910728		-0.0907808	0.58208	0.870388	18.0907	-0.0596072
O95294-3	RASAL1	3	5	1	1.07815	1.15149	0.872631	0.464889	0.246788	0.131338	0.0669922	1	0.959833	0.96425	0.842362	0.495224	0.235891	0.202166	0.0766661	1	0.962375	0.958601	0.835261	0.415171	0.258118	0.125423	0.0814361	1	0.944691	0.938203	0.900877	0.421	0.268657	0.108176	0.101185	11.8385	-0.141162	0.0216731	0.978112	11.9254	-0.121465	0	0.99422	11.4845	-0.134063	0.0177947	0.995573	11.6418	-0.156366
O95295	SNAPIN	5	6	1	1.05073	1.00205	0.820366	0.640442	0.554346	0.68824	0.803694	1	0.707074	0.880121	0.780669	0.647916	0.633038	0.524566	0.55056	1	1.06548	1.08672	0.937041	0.663284	0.586693	0.714644	0.801994	1	0.88144	0.927875	0.770125	0.6459	0.549164	0.613967	0.521826		-0.856669	0.671681	0.853594			0.133356	0.637477		-0.80739	0.691654	0.858612		-0.0609061
O95297	MPZL1	8	7	1	0.978954	0.933748	0.796367	0.55199	0.511293	0.702844	1.06433	1	1.02893	1.03834	0.889539	0.639811	0.641539	0.956894	1.24034	1	1.00974	0.951042	0.841722	0.59765	0.512171	0.762642	1.00668	1	0.977098	0.924783	0.851026	0.740484	0.713703	0.884145	1.02269		-0.107579	0.719077	0.372463		-0.312089	0.869647	0.137845		-0.525531	0.719785	0.457269		-0.121153
O95298	NDUFC2	7	5	1	0.989072	1.15269	1.05428	0.537	0.287945	0.141263	0.0321624	1	1.07864	1.08179	0.880425	0.516258	0.294036	0.103282	0.0447624	1	0.911565	1.02307	0.808266	0.492271	0.279031	0.133243	0.049445	1	1.11151	1.00623	0.933605	0.603452	0.258944	0.112121	0.0703601	12.5685	-0.162316	0.0417592	0.971426	12.2087	-0.135059	0	0.987265	11.8118	-0.125167	0	0.98876	12.7036	-0.145064
O95299	NDUFA10	16	14	1	1.02432	1.02533	0.806864	0.401897	0.151436	0.0420923	0.0180673	1	1.01236	0.998287	0.778408	0.390688	0.161348	0.0808721	0.0657684	1	1.0212	0.949135	0.775197	0.386099	0.145304	0.0540258	0.0278789	1	0.982121	0.920242	0.717355	0.37952	0.140167	0.0862222	0.0578914	11.1136	-0.164216	0	0.997365	10.9851	-0.149	0	0.999468	10.8982	-0.158285	0	0.99678	10.5912	-0.144384
O95302	FKBP9	22	24	1	1.0226	1.01405	0.87951	0.595019	0.615865	0.859618	1.30133	1	0.958143	0.984888	0.897627	0.645054	0.712213	0.908258	1.15677	1	1.00058	1.02991	0.917634	0.64909	0.643283	0.888137	1.18729	1	1.02089	1.05932	0.954903	0.82409	0.793513	0.996824	1.06178		-0.363621	0.842958	0.133175		-0.377533	0.855574	0.139577		-0.403011	0.841951	0.195044		-0.165241
O95336	PGLS	18	18	1	1.25387	1.26938	1.359	0.926706	0.926293	1.37522	0.268536	1	1.15641	1.31316	1.17084	0.968733	0.956663	0.872189	0.116112	1	1.32109	1.38605	1.19656	1.03294	0.970828	1.26718	0.21332	1	1.30992	1.28126	1.1837	1.13116	1.13542	0.580637	0.177447	20.8535	0	0	0.553283	19.3428	-0.3339	0	0.833363	20.8219	0	0	0.622365	18.0599	-1.37571
O95340-2	PAPSS2	15	14	1	1.00043	1.02072	0.876994	0.602816	0.544106	0.503067	0.147125	1	0.928571	0.937413	0.819701	0.616465	0.462562	0.268556	0.0655415	1	0.990526	1.02352	0.86869	0.607087	0.523426	0.459992	0.122633	1	1.00667	1.06496	0.879695	0.544608	0.488828	0.182287	0.0598652	14.8263	-0.0712281	0	0.931995	13.287	-0.0949975	0	0.962732	14.432	-0.0763081	0	0.944808	13.0634	-0.105493
O95347	SMC2	55	55	1	1.01545	0.984259	0.780272	0.39779	0.134945	0.0510328	0.0551936	1	1.03397	0.989223	0.798887	0.392009	0.146784	0.0856437	0.0588177	1	1.01472	0.969223	0.77919	0.395484	0.134413	0.0608398	0.0472733	1	1.03212	0.970464	0.7807	0.387043	0.16144	0.0916729	0.0569259	10.9628	-0.15782	0	0.997907	11.0524	-0.154104	0.000534202	0.998716	10.9477	-0.157179	0	0.997945	10.9761	-0.148476
O95352	ATG7	24	19	1	0.997782	0.954218	0.830567	0.545956	0.30905	0.134959	0.0558053	1	0.880214	0.926661	0.783886	0.543256	0.305035	0.179141	0.115395	1	0.985136	1.00519	0.866295	0.559717	0.297082	0.146517	0.06711	1	0.995447	0.979471	0.826695	0.546332	0.277727	0.164896	0.104937	12.2308	-0.121487	0	0.993451	12.0479	-0.106662	0	0.976167	12.4318	-0.12458	0	0.998093	12.1932	-0.116111
O95359-3	TACC2	21	22	1	0.97899	1.02673	0.879511	0.596244	0.535436	0.689094	0.719031	1	0.824802	0.861799	0.758337	0.643973	0.664615	0.595114	0.495506	1	0.976312	1.00957	0.87844	0.617318	0.558038	0.672577	0.66867	1	1.02041	0.942266	0.845486	0.787718	0.65833	0.845175	0.599863		-0.923774	0.634951	0.913255		-0.0514414	0	0.836877		-1.00194	0.629151	0.962285		-0.0305542
O95361	TRIM16	12	12	1	1.01691	0.981595	0.8962	0.607452	0.470487	0.397402	0.13813	1	0.987375	1.01201	0.870689	0.616068	0.529684	0.375268	0.107123	1	1.04243	1.04697	0.884641	0.58693	0.488508	0.382961	0.13334	1	0.947437	1.02575	0.902252	0.639095	0.4565	0.26431	0.105228	14.0517	-0.0825478	0	0.975105	14.1613	-0.0833356	0	0.9636	13.9504	-0.0830728	0	0.969614	13.7444	-0.0991939
O95363	FARS2	7	7	1	1.02665	1.00101	0.823924	0.456944	0.19652	0.068893	0.0566724	1	0.898656	0.961065	0.759177	0.406299	0.165332	0.0874124	0.069468	1	0.994467	1.00051	0.856988	0.46056	0.194957	0.0721934	0.0464756	1	0.983034	1.00033	0.772676	0.413657	0.163195	0.152876	0.0948985	11.4951	-0.146532	0	0.998073	10.954	-0.142437	0	0.989244	11.6342	-0.152337	0	0.99943	11.0374	-0.143633
O95365	ZBTB7A	6	5	1	1.04847	1.0314	0.849072	0.51338	0.428338	0.418769	0.387694	1	0.877927	0.81406	0.740305	0.455478	0.405127	0.409414	0.34812	1	0.975689	0.898902	0.777064	0.49039	0.409424	0.384164	0.370762	1	1.00312	1.02637	0.853114	0.599281	0.538462	0.5042	0.370553	12.2615	-0.139839	0.39466	0.994044	12.5088	-0.0715914	0	0.938036	12.4917	-0.0931945	0.290201	0.984313	15.4562	-0.0766448
O95372	LYPLA2	8	9	1	1.35832	1.35493	1.42231	0.978179	0.83671	0.992867	0.658161	1	1.09541	1.42948	1.31315	1.08336	1.00516	0.656218	0.429647	1	1.26064	1.34395	1.2233	0.994975	0.885122	0.933153	0.640352	1	1.28804	1.33376	1.14957	1.17858	0.998192	0.453784	0.42673			0	0.134871	18.2486	-0.90471	0.429647	0.597617			0	0.335852	17.5655	-0.398966
O95373	IPO7	47	41	1	1.03467	0.999335	0.857836	0.53738	0.281764	0.148673	0.104819	1	0.882274	0.899377	0.749516	0.49357	0.256902	0.111588	0.0570006	1	1.00638	1.00817	0.850166	0.517105	0.282837	0.1553	0.0957096	1	0.986598	0.942534	0.754961	0.474023	0.220225	0.120377	0.063927	12.2656	-0.120914	0	0.998628	11.4019	-0.12149	0	0.971166	12.1465	-0.120573	0	0.999622	11.3111	-0.1263
O95376	ARIH2	9	9	1	1.01009	1.01237	0.848651	0.59969	0.483547	0.304549	0.101506	1	0.743207	0.825541	0.803565	0.640343	0.540669	0.140707	0.0355877	1	0.981745	1.05508	0.940872	0.620688	0.473	0.273523	0.11781	1	0.931428	1.01781	0.745574	0.68034	0.44055	0.143072	0.0273695	13.5553	-0.0899943	0	0.978887	13.4472	-0.105172	0	0.807537	13.8579	-0.0979268	0	0.985651	13.1389	-0.109858
O95379	TNFAIP8	2	2	1	0.984647	0.948297	0.821649	0.611234	0.629036	0.591538	0.320755	1	1.03728	1.07801	0.861699	0.652045	0.670338	0.540251	0.187864	1	1.11513	1.11956	1.06497	0.722482	0.71307	0.713079	0.298222	1	1.08834	1.05828	1.01538	0.734733	0.725993	0.497612	0.19107	17.4766	-0.0512609	0	0.921694	16.2451	-0.0631799	0	0.896765	19.0258	-0.0561429	0	0.821832	16.9148	-0.0792349
O95382	MAP3K6	3	3	1	1.06192	1.04457	0.920932	0.529865	0.300468	0.281351	0.301637	1	1.11641	1.05652	0.79115	0.42715	0.149725	0.06577	0.0355916	1	1.02786	1.13876	0.882378	0.544373	0.305724	0.26403	0.271778	1	1.10091	1.02359	0.799246	0.43856	0.179099	0.070633	0.0609707	12.1435	-0.163479	0.269347	0.991721	11.1671	-0.155113	0	0.986634	12.2475	-0.138442	0.229325	0.977354	11.2923	-0.146783
O95391	SLU7	3	2	1	1.03276	1.16388	0.8918	0.438409	0.252872	0.181554	0.160592	1	1.13159	1.16345	0.884728	0.595395	0.351358	0.343549	0.472602	1	0.994385	1.04946	0.803188	0.377896	0.209725	0.169871	0.15726	1	1.15041	1.04584	0.959525	0.617438	0.538168	0.370111	0.423555	11.5786	-0.16805	0.151	0.977245	12.7755	-0.135994	0.375264	0.92483	10.9265	-0.16805	0.136439	0.997508	14.2647	-0.111349
O95394-4	PGM3	36	27	1	1.00605	0.998425	0.858261	0.604543	0.562416	0.517513	0.134962	1	0.894332	0.952218	0.837935	0.632503	0.586391	0.382595	0.0693674	1	1.00579	1.00732	0.873079	0.637778	0.564003	0.497857	0.134151	1	0.975864	1.01948	0.907608	0.731774	0.529543	0.24659	0.0602449	14.8898	-0.0696759	0	0.917292	14.347	-0.0819756	0	0.907842	15.0398	-0.0720103	0	0.931793	14.5184	-0.111199
O95396	MOCS3	9	8	1	0.998326	1.03637	0.849227	0.491674	0.267192	0.176172	0.0830157	1	0.843522	0.928933	0.79245	0.477378	0.27385	0.169169	0.121788	1	0.988332	1.04028	0.842125	0.48447	0.273196	0.156622	0.0942252	1	0.931559	0.970823	0.766726	0.457724	0.268689	0.19961	0.147756	12.0036	-0.122436	0.00244116	0.997645	11.6827	-0.11229	0	0.969056	11.9386	-0.123037	0.0054145	0.997722	11.4792	-0.113314
O95400	CD2BP2	16	17	1	1.02272	0.994552	0.837622	0.51242	0.527528	0.643151	0.504621	1	1.08573	1.03745	0.874525	0.585719	0.619392	0.685429	0.382869	1	0.990344	0.997848	0.82247	0.50411	0.489778	0.641408	0.43389	1	1.00243	1.02693	0.924081	0.712789	0.714519	0.621006	0.327319		-1.21721	0.54693	0.965518		-0.103091	0.53719	0.869627		-1.31005	0.517296	0.944971	18.7033	-0.051608
O95402	MED26	4	2	1	1.04754	0.944579	0.740836	0.45821	0.374167	0.296661	0.226057	1	1.13269	1.05148	0.691827	0.602763	0.351881	0.20864	0.154343	1	0.978842	0.93441	0.750362	0.468799	0.348076	0.284634	0.231813	1	1.06684	0.922511	0.821884	0.589613	0.415638	0.214761	0.192463	11.8074	-0.0932031	0.0991557	0.994395	12.2253	-0.0941575	0	0.96099	11.7819	-0.095354	0.100702	0.997334	12.9741	-0.0905763
O95405	ZFYVE9	11	5	1	0.989185	1.16418	1.03577	0.618844	0.577602	0.538694	0.313628	1	1.17837	1.14215	0.957268	0.679017	0.517014	0.399613	0.212361	1	0.939268	0.943142	0.838372	0.584156	0.522683	0.48803	0.245292	1	1.00647	1.0159	0.887716	0.730298	0.496616	0.390513	0.156126	15.3159	-0.0989021	0.401772	0.898749	15.0595	-0.07944	0	0.933903	14.8091	-0.064332	0	0.953841	14.851	-0.0842259
O95407	TNFRSF6B	1		1	0.997094	1.024	0.855065	0.523967	0.395324	0.425367	0.329459									1	1.08527	1.17024	1.01924	0.56796	0.423534	0.288039	0.157423									12.3747	-0.128726	0.352862	0.992947					13.2492	-0.120988	0.154142	0.951247
O95425	SVIL	10	5	1	1.04296	1.1109	0.90027	0.463835	0.274028	0.246906	0.1831	1	1.29933	1.22651	0.987618	0.495943	0.288585	0.230689	0.169088	1	1.02655	1.05505	0.846851	0.464498	0.240555	0.214595	0.206842	1	1.14139	1.04431	1.04913	0.582941	0.309732	0.21641	0.172034	11.7415	-0.162619	0.192233	0.986032	12.0596	-0.194936	0.19947	0.905165	11.5414	-0.151884	0.171769	0.995097	12.5916	-0.188927
O95429	BAG4	8	8	1	0.973753	1.0581	0.931145	0.636261	0.626308	0.899901	1.4639	1	1.03083	0.993837	0.906213	0.663134	0.690505	0.971225	1.40751	1	0.975578	0.981716	0.874863	0.651489	0.619911	0.907575	1.22247	1	1.07255	1.04589	0.958384	0.797314	0.81502	0.996345	1.1751		-0.187414	0.906592	0.038283		-0.188891	0.927717	0.0322452		-0.0883291	0.854689	0.118645		-0.123702
O95433	AHSA1	53	52	1	0.951535	0.934441	0.838975	0.535477	0.302541	0.166199	0.0977979	1	1.02205	1.00011	0.866017	0.56254	0.298118	0.112393	0.0496537	1	1.0009	0.978774	0.845485	0.569449	0.327383	0.172215	0.098373	1	1.0103	1.02432	0.915665	0.55502	0.271849	0.11864	0.0558247	12.2371	-0.114784	0	0.993197	12.4116	-0.130978	0	0.995993	12.5328	-0.112805	0	0.997798	12.4575	-0.139039
O95453	PARN	32	19	1	0.984647	1.01019	0.852881	0.590393	0.528297	0.552335	0.324857	1	1.00114	1.00041	0.884371	0.635902	0.619749	0.535274	0.103389	1	0.993646	1.00648	0.866287	0.590537	0.528292	0.548516	0.294776	1	1.01271	1.05994	0.961209	0.756042	0.664441	0.513021	0.136072	15.5969	-0.0687826	0.273239	0.954932	15.4449	-0.0709487	0	0.89011	15.6184	-0.0628855	0.120741	0.949751	16.4816	-0.0824696
O95455	TGDS	2		1	0.888877	0.921898	0.842533	0.569292	0.650036	0.907538	1.17886									1	0.94143	0.990064	0.76529	0.643947	0.542654	0.814453	1.13997										-0.147674	0.829609	0.0614208						-0.58311	0.781262	0.251995
O95456	PSMG1	19	18	1	0.948826	0.935948	0.828009	0.598429	0.56406	0.919982	1.18575	1	0.922236	0.986081	0.903421	0.65655	0.65074	0.780864	0.94693	1	1.01531	1.02669	0.885143	0.653928	0.649253	0.969884	1.27426	1	1.01193	1.05354	0.881948	0.77293	0.711555	0.894606	0.825267		-0.162157	0.819207	0.126107		-0.604906	0.758771	0.541439		-0.316423	0.886494	0.100141		-0.519939
O95466-3	FMNL1	2		1	1.18716	1.1959	0.806091	0.336705	0.156629	0.108734	0.0980391									1	1.08495	0.975765	0.821416	0.423409	0.130125	0.0633836	0.0465573									10.7727	-0.186607	0.0808441	0.955233					11.2345	-0.161841	0	0.99317
O95470	SGPL1	21	20	1	1.01338	0.932021	0.738689	0.376103	0.165311	0.0912683	0.0683403	1	1.00903	0.962267	0.74468	0.366507	0.152905	0.0928164	0.0419668	1	1.00613	0.937701	0.734794	0.389911	0.165945	0.104015	0.0764054	1	1.00459	0.997857	0.739497	0.353801	0.170469	0.0977572	0.0574487	10.7306	-0.141883	0	0.997075	10.7226	-0.14908	0	0.99892	10.7723	-0.137781	0	0.997383	10.7023	-0.146078
O95471	CLDN7	3	1	1	0.967998	0.913465	0.774962	0.54428	0.477609	0.643195	0.624861	1	1.07613	0.925698	0.961142	0.615706	0.531487	0.744192	0.551334	1	1.20681	1.14398	1.16848	0.674124	0.634147	0.726439	0.876384	1	1.18792	1.31233	0.951054	0.658676	0.604936	0.705624	0.597031		-1.14184	0.572486	0.907151		-0.248012	0.609619	0.881643		-0.151661	0.725974	0.66094		-0.156575
O95476	CTDNEP1		1									1	0.952002	0.919629	0.667421	0.302986	0.0773218	0.0249575	0.0183936									1	1.08065	1.13833	0.698308	0.2906	0.107951	0.0441855	0.049268					10.0367	-0.173099	0	0.991879					10.2372	-0.180424
O95478	NSA2	4	2	1	1.06801	1.04266	0.729067	0.288613	0.10595	0.049618	0.0344903	1	0.756795	0.831909	0.684744	0.416244	0.285218	0.313369	0.26764	1	1.0123	0.951539	0.649655	0.277897	0.112198	0.0734463	0.0350358	1	0.887434	1.07374	0.805695	0.428189	0.320278	0.278211	0.213117	10.3527	-0.17829	0.00111761	0.995273	10.8284	-0.0872131	0	0.876779	9.9422	-0.162357	0	0.999107	11.3269	-0.144037
O95479	H6PD	6	6	1	1.03121	0.958372	0.856705	0.561574	0.506721	0.355382	0.11215	1	1.03063	1.00177	0.85308	0.584618	0.468345	0.269137	0.115243	1	1.01438	1.03071	0.911788	0.636891	0.517179	0.341139	0.171764	1	1.03727	1.08523	0.974018	0.714947	0.481067	0.229602	0.156989	13.6105	-0.0835589	0	0.964642	13.3492	-0.0925036	0	0.985024	14.3807	-0.0836278	0	0.986452	14.3674	-0.105135
O95486	SEC24A	21	14	1	1.00799	0.948709	0.82766	0.541037	0.308567	0.151071	0.0815017	1	0.877331	0.907249	0.82036	0.540918	0.268097	0.114406	0.0630385	1	1.04725	0.996513	0.890212	0.548046	0.309044	0.151445	0.0971734	1	0.980185	1.01589	0.803057	0.47586	0.240078	0.113507	0.0658522	12.2149	-0.116679	0	0.995283	12.032	-0.125998	0	0.972756	12.4998	-0.121482	0	0.997539	11.6133	-0.130463
O95487	SEC24B	25	18	1	1.03531	1.03575	0.854414	0.500764	0.263442	0.12144	0.111636	1	0.967758	0.957405	0.820798	0.49443	0.246394	0.0901441	0.056401	1	1.00587	0.997699	0.835611	0.486262	0.24351	0.137447	0.10479	1	0.989687	1.01867	0.791798	0.453473	0.201599	0.110453	0.0572139	11.9881	-0.129144	0.0153916	0.996824	11.7504	-0.133902	0	0.995067	11.8134	-0.127767	0.0119791	0.999781	11.3867	-0.136794
O95502	NPTXR	4	1	1	1.04837	1.10701	0.922138	0.594286	0.520797	0.721117	0.897027	1	1.13328	1.09544	0.617833	0.709693	0.439775	0.732176	0.994954	1	0.920103	0.965869	0.90191	0.579638	0.48339	0.653781	0.904186	1	1.32354	1.28964	1.06791	0.320912	0.757718	0.81215	0.620742		-0.853931	0.683307	0.707596		-1.77372	0.698886	0.568441		-1.08744	0.655249	0.616706		-0.266448
O95503	CBX6	1	2	1	0.986414	1.04148	0.858507	0.40827	0.272187	0.211852	0.0850442	1	1.03041	1.03863	0.838981	0.33968	0.198886	0.198369	0.332477	1	0.786287	1.11693	0.857902	0.395452	0.206042	0.152725	0.193009	1	0.959273	1.00223	0.640731	0.377944	0.248741	0.186472	0.218567	11.4888	-0.146493	0.103339	0.991437	10.5318	-0.241839	0.242429	0.984965	11.1496	-0.184102	0.154577	0.943935	10.2261	-0.143472
O95544-2	NADK		4									1	1.00133	1.05759	0.899933	0.590219	0.608846	0.676347	0.629789									1	0.99184	1.04849	0.92952	0.668664	0.673332	0.675711	0.538618						-1.02334	0.6263	0.973534						-0.0992373
O95544	NADK	10		1	0.939368	1.01042	0.857717	0.589451	0.543509	0.773176	0.881222									1	0.959575	0.975235	0.849591	0.629477	0.558666	0.725064	0.78625										-0.8039	0.696839	0.642038						-0.926073	0.674864	0.828496
O95551-2	TDP2	8	4	1	0.949893	0.942871	0.835918	0.530019	0.445539	0.60023	0.811677	1	1.08548	1.15622	0.951966	0.680048	0.753224	1.07946	1.20455	1	0.989528	1.01495	0.830918	0.594413	0.475559	0.667557	0.771505	1	1.02153	1.16995	1.03164	0.771476	0.782494	0.928857	1.11684		-1.15178	0.596866	0.746389		-0.161356	0.929322	0.0871248		-0.999141	0.627258	0.83763		-0.0574738
O95562	SFT2D2	1		1	1.16519	0.961044	0.904016	0.595014	0.648763	0.893707	1.13394									1	1.07319	1.19777	1.18278	0.681876	0.536932	0.901648	1.40292										-0.0668557	0.83119	0.262644						-0.0350743	0.892947	0.0765048
O95563	MPC2	5	5	1	0.981213	0.922327	0.729587	0.45457	0.204591	0.0877771	0.0548593	1	0.986925	0.961837	0.795274	0.413729	0.172893	0.0950172	0.0702732	1	0.997098	0.936745	0.750312	0.459801	0.234662	0.10872	0.0611935	1	1.06958	0.940544	0.764498	0.438707	0.198373	0.0955988	0.0717493	11.0302	-0.13091	0	0.990995	11.1616	-0.143837	0	0.998692	11.2395	-0.126405	0	0.994543	11.1542	-0.134024
O95568	METTL18	4	2	1	0.988283	1.15004	0.97403	0.636237	0.558229	0.453529	0.285427	1	1.02026	1.13686	0.768121	0.510258	0.479207	0.257451	0.0332103	1	1.04724	1.03055	0.939216	0.611285	0.573117	0.425957	0.188294	1	1.12801	1.01559	0.911283	0.760362	0.423411	0.244779	0.167692	15.3606	-0.076941	0.188087	0.942642	12.5618	-0.0972553	0	0.9406	15.0035	-0.0745967	0	0.959674	14.2816	-0.105647
O95571	ETHE1	25	20	1	0.988526	1.03454	0.896783	0.617247	0.630604	0.916453	1.44441	1	0.81941	0.93957	0.836018	0.643095	0.665784	0.790638	0.975349	1	0.965471	1.0058	0.886619	0.631246	0.618117	0.894385	1.23914	1	0.982225	1.07233	0.879996	0.792688	0.705585	0.918141	0.927028		-0.297285	0.9011	0.0447905		-0.0851089	0.777528	0.162366		-0.369579	0.845721	0.123247		-0.403087
O95573	ACSL3	51	46	1	0.988525	0.944991	0.751223	0.410291	0.167845	0.08896	0.097255	1	0.82406	0.898215	0.726883	0.391146	0.17277	0.0985077	0.0915185	1	1.00558	0.959071	0.77042	0.401523	0.172933	0.0992841	0.0934057	1	0.946493	0.936539	0.683787	0.381568	0.173978	0.107053	0.0829424	10.932	-0.137299	0	0.996347	10.7092	-0.133532	0	0.961117	10.9972	-0.141022	0.00944549	0.998341	10.4856	-0.132318
O95602	POLR1A	53	51	1	1.04048	1.01776	0.842849	0.48209	0.208863	0.099734	0.096938	1	0.932903	0.993345	0.848784	0.457985	0.193563	0.105073	0.0891936	1	1.02873	1.03369	0.873388	0.489773	0.207568	0.113159	0.0970722	1	1.01206	1.03553	0.823833	0.429417	0.197083	0.123696	0.0915819	11.7207	-0.139609	0.0100307	0.997253	11.5821	-0.147432	0.0239637	0.9957	11.8356	-0.148589	0.0358848	0.997882	11.3641	-0.147098
O95613	PCNT	16	9	1	0.986523	1.03697	0.871305	0.565187	0.470362	0.471338	0.439869	1	1.24594	1.11894	0.982752	0.586208	0.554389	0.547929	0.523931	1	0.966274	0.984122	0.804475	0.549829	0.453775	0.491777	0.368354	1	1.16262	1.14787	1.1147	0.809774	0.700947	0.602034	0.516067	13.6257	-0.125772	0.444239	0.99599		-0.201715	0.541042	0.878193	13.49	-0.0995373	0.386396	0.98492		-0.0672274
O95619	YEATS4	7	6	1	0.984353	1.10121	0.872325	0.510994	0.47372	0.563795	0.726987	1	1.00825	1.03571	0.843477	0.553603	0.449177	0.632851	0.578443	1	0.922417	0.94411	0.808622	0.503604	0.432831	0.499281	0.633161	1	1.04088	1.03611	0.888418	0.688266	0.588893	0.659308	0.536339		-1.28473	0.568874	0.885249		-0.614778	0.553518	0.950971		-1.28223	0.517219	0.916759		-0.0810864
O95625	ZBTB11	4	2	1	1.00211	1.037	0.796296	0.343409	0.15854	0.103468	0.0767429	1	1.05331	0.982279	0.788458	0.318287	0.0678085	0.0955195	0.0580429	1	0.940337	0.957258	0.687568	0.297588	0.131563	0.0998812	0.0732952	1	1.20608	0.986905	0.897363	0.354099	0.187914	0.119746	0.125286	10.8038	-0.172429	0.0540657	0.998731	10.6009	-0.191917	0.0330436	0.995297	10.1756	-0.161534	0.0300551	0.996169	11.119	-0.209333
O95628-10	CNOT4		8									1	0.87661	0.919433	0.834156	0.629632	0.476393	0.480658	0.557902									1	1.01268	1.07923	0.931883	0.691863	0.545288	0.549618	0.599146					20.5542	-0.0973501	0.48637	0.906532						-0.104593
O95628-9	CNOT4	11		1	0.920724	0.918896	0.867576	0.557913	0.451651	0.562182	0.719168									1	1.13214	1.02311	1.03897	0.678487	0.526411	0.598776	0.844208										-1.08853	0.572729	0.833528						-1.05243	0.656465	0.794419
O95630	STAMBP	13	20	1	0.950957	1.03846	0.863261	0.615399	0.589606	0.888294	1.33234	1	0.912457	0.966239	0.889275	0.612611	0.651332	0.870664	1.04784	1	1.00164	0.997518	0.890897	0.641815	0.608127	0.921198	1.18882	1	1.0071	1.02105	0.894303	0.778346	0.682499	0.884505	0.872773		-0.320988	0.85641	0.0909053		-0.581241	0.795612	0.239376		-0.414101	0.83999	0.165858		-0.494412
O95639	CPSF4	7	4	1	0.945953	0.936199	0.702891	0.361622	0.1572	0.0753218	0.0636173	1	0.728542	0.860912	0.647509	0.356218	0.154753	0.121389	0.0824556	1	0.90537	0.844008	0.625422	0.3393	0.14307	0.087477	0.0432176	1	0.83399	0.909561	0.602825	0.321997	0.137137	0.0988117	0.0961763	10.4854	-0.143801	0	0.994774	10.0136	-0.128842	0	0.90754	9.77721	-0.136903	0	0.977469	9.74792	-0.136994
O95644	NFATC1	8	2	1	1.0582	1.09443	0.942718	0.513313	0.319329	0.176677	0.137478	1	1.20085	1.0694	0.912081	0.506257	0.31419	0.194659	0.0745799	1	0.979672	1.01953	0.877308	0.488189	0.273361	0.182597	0.103222	1	1.12923	1.12062	1.04562	0.563133	0.288778	0.215697	0.14116	12.3358	-0.142695	0.111931	0.986623	12.3977	-0.123592	0.0182709	0.962222	12.0169	-0.131557	0.0569916	0.9982	12.4622	-0.19452
O95671	ASMTL	19	16	1	0.976229	0.960311	0.808774	0.473561	0.242148	0.108811	0.0617082	1	0.785147	0.861762	0.735251	0.459764	0.21764	0.059974	0.0365987	1	1.03114	1.0577	0.896456	0.513121	0.255378	0.111546	0.0562576	1	0.922651	0.950051	0.705549	0.423093	0.184117	0.0802417	0.0475307	11.6073	-0.130962	0	0.99712	11.0438	-0.132732	0	0.928286	12.1586	-0.13996	0	0.996068	10.7625	-0.136021
O95674	CDS2	6	2	1	1.02368	1.14766	0.899919	0.51896	0.297319	0.210858	0.196055	1	0.93365	0.966342	0.79761	0.498284	0.374959	0.240262	0.133632	1	0.915095	0.964987	0.750295	0.453297	0.26128	0.183291	0.0751952	1	1.02237	1.12257	0.949666	0.802478	0.355708	0.279704	0.25848	12.1644	-0.143076	0.163482	0.979505	12.2443	-0.0967844	0	0.990202	11.3575	-0.115563	0	0.990134	13.6605	-0.19356
O95684	FGFR1OP	6	9	1	0.985437	0.959325	0.827028	0.563858	0.48033	0.510217	0.378298	1	1.03444	1.07515	0.852882	0.634103	0.553631	0.536949	0.411045	1	1.05563	1.01553	0.919775	0.636245	0.511404	0.591327	0.481174	1	0.95797	0.980691	0.876847	0.689551	0.583553	0.574222	0.431708	14.3311	-0.090509	0.389501	0.981878	16.9461	-0.0759164	0.408092	0.970506		-0.114883	0.516467	0.975395	18.8848	-0.0520303
O95685	PPP1R3D	4	1	1	1.03231	1.06657	0.918412	0.633922	0.676215	0.819496	1.1005	1	0.934137	0.772233	0.884095	0.533279	0.531894	0.483667	0.296368	1	0.957603	0.967964	0.786306	0.600634	0.590965	0.780717	0.749923	1	0.890031	1.1245	0.86097	0.415017	0.523838	0.239378	0.233548		-0.522609	0.807533	0.377067	14.9269	-0.0601069	0	0.863948		-0.836971	0.68056	0.821186	12.0755	-0.122053
O95707	POP4	5	9	1	1.01187	0.986747	0.80416	0.535406	0.441192	0.529902	0.544673	1	1.01924	0.979161	0.822467	0.536995	0.494791	0.528172	0.457095	1	0.94292	0.903469	0.714567	0.499565	0.401191	0.493928	0.429452	1	1.01697	0.99821	0.869426	0.621604	0.550285	0.586366	0.461283		-0.196293	0.507757	0.983475	14.6156	-0.147033	0.487287	0.992672	12.912	-0.0945038	0.382901	0.968641		-0.092236
O95714	HERC2	63	36	1	1.06591	1.03024	0.799469	0.35712	0.131363	0.0969739	0.111224	1	1.02408	1.02974	0.751841	0.32564	0.140527	0.108688	0.0989491	1	1.00744	0.964426	0.726976	0.328681	0.130613	0.0955149	0.0971691	1	1.04751	0.966449	0.717161	0.331057	0.147367	0.136373	0.123036	10.809	-0.178163	0.0666776	0.994781	10.5168	-0.175569	0.0682079	0.998283	10.433	-0.164183	0.0446132	0.998493	10.3742	-0.164846
O95716	RAB3D	2	1	1	0.949193	1.01953	0.942464	0.61705	0.663924	1.11727	1.65401	1	0.887061	0.925479	0.759725	0.642094	0.399931	0.418866	0.917422	1	1.09306	1.0717	0.973416	0.745945	0.782686	1.22999	1.65773	1	0.841929	1.06728	0.740873	0.376648	0.469696	0.595599	0.56345		0	1.5	0.590503		-0.151456	0.590551	0.496736		0	1.5	0.736361		-1.75801
O95721	SNAP29	14	13	1	1.01085	1.05625	0.916386	0.584639	0.513811	0.539935	0.531259	1	1.05804	0.964947	0.914027	0.61246	0.530233	0.547829	0.551872	1	0.992737	1.06308	0.945228	0.603129	0.511734	0.530993	0.530075	1	1.00753	1.0254	0.966535	0.74016	0.644873	0.590577	0.530199		-0.154048	0.526343	0.990928		-0.133857	0.539613	0.986144		-0.149932	0.521098	0.98938		-0.0696413
O95747	OXSR1	12	15	1	0.9744	0.924482	0.770161	0.488546	0.252507	0.117068	0.0829297	1	0.860294	0.885658	0.750209	0.56592	0.304238	0.131411	0.0591109	1	0.994419	0.994554	0.811691	0.492926	0.254582	0.138319	0.0769432	1	0.96063	0.951964	0.826221	0.551547	0.252699	0.147897	0.082649	11.5082	-0.121528	0	0.992375	11.8825	-0.112728	0	0.950035	11.7788	-0.124511	0	0.999085	12.1199	-0.122714
O95749	GGPS1	3	7	1	1.01381	1.03253	0.870878	0.654983	0.597439	0.712909	0.257531	1	0.89356	1.01338	0.780755	0.582885	0.695981	0.867409	0.430561	1	0.952734	1.02974	0.869752	0.657042	0.673905	0.654805	0.144687	1	1.03226	1.05308	0.906565	0.93314	0.784679	0.762556	0.479472	17.8483	-0.0514378	0	0.833489		-0.893554	0.644209	0.610731	16.8014	-0.0601651	0	0.808914		-0.0506455
O95754	SEMA4F	1		1	1.05453	0.982731	0.845758	0.514269	0.40142	0.418324	0.426532									1	0.940055	0.942057	0.888163	0.440811	0.356756	0.342127	0.385237									12.0958	-0.149271	0.406583	0.992624					11.2597	-0.203088	0.357444	0.987346
O95755	RAB36		2									1	1.02168	1.02592	0.963081	0.604075	0.543579	0.602834	0.569846									1	0.974187	0.995644	1.07222	0.665515	0.537865	0.534076	0.411383						-0.185942	0.572198	0.991739					14.8584	-0.198087
O95757	HSPA4L	57	47	1	0.970338	0.957001	0.841889	0.604305	0.555508	0.553202	0.145371	1	0.932939	1.00789	0.890861	0.638647	0.581556	0.379753	0.0610184	1	1.03601	1.01818	0.890212	0.639838	0.587054	0.517473	0.144517	1	0.993676	1.06275	0.947403	0.697948	0.54288	0.254778	0.0739212	15.0025	-0.0660795	0	0.89444	14.5365	-0.0870323	0	0.934093	15.374	-0.0701704	0	0.923833	14.4873	-0.106543
O95758-4	PTBP3	25	13	1	1.00536	0.927412	0.780276	0.558392	0.474667	0.391945	0.0937056	1	1.03989	0.982233	0.823532	0.631297	0.533231	0.299305	0.0676608	1	1.08333	1.04214	0.904563	0.627738	0.493974	0.386214	0.148285	1	1.06167	1.04	0.925467	0.737917	0.565572	0.212056	0.101435	13.1267	-0.0804716	0	0.951055	13.7932	-0.0899121	0	0.957135	14.3035	-0.082715	0	0.970964	14.7074	-0.111162
O95759	TBC1D8	10	3	1	1.03287	0.844373	0.723907	0.411223	0.200904	0.12092	0.105813	1	1.03475	0.976431	0.795919	0.416767	0.177905	0.0714681	0.0399796	1	1.078	1.0284	0.872284	0.450914	0.201276	0.13209	0.109065	1	0.999348	1.06539	0.788738	0.368146	0.187629	0.0725956	0.0889541	10.7315	-0.121603	0	0.982274	11.1707	-0.149544	0	0.99787	11.5927	-0.158658	0.0725444	0.994482	10.9401	-0.158169
O95772	STARD3NL		2									1	1.28526	1.24034	0.896527	0.598886	0.426148	0.475468	0.341465									1	0.927031	0.85471	0.804121	0.541513	0.424708	0.297827	0.353464					13.5009	-0.114415	0.373698	0.848245					13.175	-0.0711547
O95777	NAA38	13	6	1	0.969459	0.967338	0.797404	0.560911	0.567105	0.700198	1.05011	1	1.07376	1.09494	0.926015	0.681657	0.843752	1.19243	1.3495	1	1.0395	1.09919	0.920119	0.650129	0.586598	0.776644	0.973964	1	0.975447	1.1457	1.03071	0.854191	0.974436	1.08258	1.18093		-0.680732	0.71958	0.418002		0.549946	1.3495	0.516934		-0.68934	0.746834	0.601079		0.167449
O95782	AP2A1	66	67	1	0.998351	0.963918	0.84791	0.57852	0.428117	0.218617	0.074253	1	0.958234	0.922689	0.820667	0.585607	0.416698	0.132141	0.0378962	1	1.02289	1.01095	0.894647	0.602974	0.437124	0.221193	0.0876168	1	1.00387	0.969432	0.859578	0.641391	0.389541	0.128668	0.0609079	12.9722	-0.102442	0	0.985492	12.7058	-0.113053	0	0.968731	13.3319	-0.10461	0	0.990139	13.1218	-0.120963
O95785	WIZ	15	11	1	0.996355	0.987664	0.817649	0.477233	0.319889	0.260322	0.282564	1	0.948192	0.969303	0.824829	0.516375	0.371074	0.258347	0.281831	1	0.949532	0.962657	0.793762	0.461881	0.294597	0.281085	0.257958	1	1.01004	1.01464	0.806534	0.516132	0.345166	0.31836	0.27956	11.6487	-0.133752	0.237507	0.998777	12.2383	-0.110671	0.20472	0.993251	11.4417	-0.132792	0.225334	0.99459	12.0775	-0.115288
O95786	DDX58	19	7	1	1.01202	1.01528	0.871604	0.478827	0.22381	0.102668	0.0726648	1	0.877333	0.924004	0.815399	0.436726	0.214052	0.12229	0.137096	1	0.976681	1.01967	0.844024	0.464505	0.217692	0.110639	0.0757484	1	0.935394	0.972303	0.734917	0.41722	0.206008	0.161084	0.142935	11.8418	-0.142016	0.00275361	0.999508	11.3512	-0.140139	0.0585541	0.978596	11.6797	-0.137943	0	0.999022	10.9378	-0.129988
O95789	ZMYM6	3		1	0.921425	0.911436	0.804396	0.355337	0.165255	0.0901509	0.182875									1	0.893616	0.988522	0.653675	0.374757	0.162926	0.135731	0.1141									10.7727	-0.181611	0.11139	0.981465					10.3298	-0.135581	0.0322817	0.986732
O95793-3	STAU1	1	1	1	0.942053	1.13278	0.933524	0.498983	0.298211	0.360231	0.35286	1	1.19765	1.00775	0.807903	0.345591	0.196208	0.162673	0.0767788	1	1.00326	0.909617	0.831486	0.473002	0.318228	0.330554	0.212775	1	1.06159	1.03573	0.903613	0.428177	0.225019	0.167924	0.170796	11.8726	-0.191005	0.330747	0.969419	10.8708	-0.169116	0.0883368	0.970552	11.8314	-0.122703	0.210559	0.984349	11.496	-0.183308
O95793	STAU1	20	23	1	1.04293	0.972697	0.682452	0.318063	0.130492	0.091064	0.0795574	1	1.02643	0.986014	0.707571	0.336555	0.15489	0.129117	0.121362	1	1.021	0.963155	0.680648	0.312095	0.13393	0.102254	0.0823435	1	1.0855	0.965803	0.700097	0.33992	0.203084	0.157729	0.158502	10.2303	-0.155301	0.0194035	0.99794	10.3748	-0.160143	0.0767086	0.998667	10.1938	-0.156072	0.028588	0.998911	10.3618	-0.154258
O95801	TTC4	13	14	1	0.951027	1.03115	0.902081	0.571342	0.382589	0.179662	0.0469157	1	1.00994	1.01203	0.880139	0.615941	0.364898	0.117858	0.0432159	1	1.03584	1.01548	0.899909	0.557878	0.382449	0.181603	0.0679226	1	0.950388	1.02096	0.896584	0.645194	0.318515	0.0987392	0.0424584	12.8897	-0.117541	0	0.988495	12.9407	-0.127491	0	0.991134	12.8279	-0.114607	0	0.992033	12.9943	-0.141161
O95816	BAG2	30	19	1	0.977892	0.975722	0.830327	0.571512	0.450604	0.637174	0.978071	1	0.967619	0.954638	0.827277	0.576199	0.52639	0.682162	1.09388	1	1.0264	1.02892	0.881512	0.614157	0.487437	0.656695	1.0517	1	1.00825	1.07701	0.93702	0.711492	0.624683	0.817111	1.05487		-1.89451	0.65934	0.540201		-0.693002	0.719658	0.349847		-0.777506	0.702497	0.48881		-0.522708
O95817	BAG3	33	35	1	0.929358	1.03886	0.880696	0.588105	0.59008	0.826602	1.20266	1	1.06415	1.09106	0.936918	0.670912	0.715129	0.967493	1.28198	1	0.95368	0.975103	0.867065	0.606328	0.571039	0.78849	1.09954	1	1.01684	1.13043	1.04161	0.845969	0.832403	1.01499	1.15231		-0.457512	0.801861	0.188406		-0.231731	0.908879	0.100743		-0.639757	0.766349	0.293475		-0.0155837
O95819	MAP4K4		16									1	1.01576	1.00373	0.750761	0.329861	0.144768	0.11834	0.0964354									1	1.00753	0.97282	0.732693	0.337452	0.165299	0.112398	0.105119					10.5348	-0.171197	0.0675982	0.999406					10.5207	-0.158138
O95822	MLYCD	5	7	1	0.984465	0.952587	0.870559	0.5959	0.524021	0.574479	0.242581	1	0.871966	1.05645	0.964032	0.67306	0.649459	0.608157	0.136494	1	1.00764	1.04625	0.86437	0.566301	0.511413	0.60256	0.219035	1	0.915382	1.12195	0.884231	0.755167	0.635347	0.468248	0.0817286	15.5657	-0.0605691	0	0.920616	16.5235	-0.0689517	0	0.835114	15.3587	-0.0622465	0	0.893518	15.8857	-0.0880933
O95825	CRYZL1	14	10	1	0.977655	0.937584	0.812364	0.603983	0.573669	0.883564	1.27978	1	0.983392	0.971449	0.876094	0.635823	0.675774	0.951693	1.22409	1	0.95797	1.02908	0.852911	0.671647	0.615947	0.898667	1.28053	1	0.981121	1.05618	0.933964	0.76601	0.75714	0.946995	1.11496						-0.13771	0.872688	0.095559		-0.45389	0.86394	0.105321		-0.241289
O95831	AIFM1	45	42	1	0.989533	0.98853	0.833904	0.540157	0.386507	0.411911	0.476577	1	1.01737	0.9661	0.828018	0.547402	0.429242	0.414574	0.432488	1	1.00015	1.00404	0.849792	0.542088	0.400815	0.424896	0.442959	1	1.0067	0.999376	0.892297	0.608476	0.434504	0.415314	0.373519	12.3693	-0.14138	0.4189	0.986646	12.8391	-0.120139	0.402023	0.99606	12.5142	-0.137799	0.412255	0.995265	13.6253	-0.106902
O95833	CLIC3	7	7	1	1.00457	1.02322	0.897284	0.595087	0.592013	0.803688	0.739783	1	1.01798	1.05103	0.92396	0.628596	0.636747	0.678979	0.445707	1	1.01462	1.02257	0.900974	0.59921	0.600037	0.773515	0.634758	1	1.05367	1.08042	1.0235	0.910695	0.694019	0.682788	0.325456		-0.774302	0.682643	0.845141		-0.107759	0.571187	0.909567		-0.923122	0.65188	0.915398	19.0087	-0.0678851
O95834-3	EML2	18	17	1	0.994618	0.972713	0.868435	0.608405	0.524334	0.313054	0.0850971	1	0.898195	0.966758	0.822433	0.632365	0.557678	0.22114	0.0871884	1	0.996278	0.99989	0.871662	0.647339	0.556654	0.27864	0.0947794	1	0.929426	0.960183	0.826385	0.671892	0.464111	0.194692	0.118415	13.8409	-0.0896601	0	0.966694	13.7394	-0.0934526	0	0.937404	14.1671	-0.0923139	0	0.967384	13.5846	-0.0998285
O95835	LATS1	5	3	1	0.987194	0.996242	0.823653	0.433758	0.21597	0.136475	0.16789	1	1.03262	0.917676	0.808839	0.403355	0.218656	0.178139	0.190894	1	1.02356	1.05026	0.843149	0.46556	0.2401	0.187722	0.175206	1	1.0974	1.03984	0.833435	0.47308	0.213362	0.180023	0.233782	11.3181	-0.151136	0.106253	0.998081	11.0587	-0.158037	0.148837	0.992025	11.5896	-0.145959	0.133294	0.996418	11.476	-0.153013
O95848	NUDT14	2	4	1	0.955521	1.05821	0.92298	0.599466	0.648617	0.990672	1.21759	1	1.21552	1.12481	0.952416	0.627225	0.610315	0.861794	0.82917	1	0.964738	1.0518	0.842495	0.606213	0.611026	0.914204	1.09301	1	1.05244	1.1397	1.0584	0.773454	0.773241	0.763824	0.618508		-0.338816	0.864087	0.113876		-0.687686	0.732126	0.65169		-0.401475	0.806114	0.285134		-0.163988
O95857	TSPAN13	2	1	1	1.07647	1.0216	0.918344	0.655243	0.623059	0.910245	1.21961	1	0.79549	1.00298	0.848733	0.51744	0.908613	0.669887	0.455759	1	1.04652	1.181	0.974668	0.614976	0.638774	0.79394	0.927174	1	1.04654	1.17501	0.816149	0.537773	0.449534	0.468821	0.707274		-0.358396	0.852039	0.182978		-0.0365754	0	0.444775		-0.705641	0.743716	0.644232		-1.15322
O95858	TSPAN15	3	1	1	1.00393	1.05651	0.921695	0.658551	0.674621	0.918179	1.23558	1	0.893665	1.05359	0.904743	0.582445	0.66156	0.799769	0.929069	1	0.8899	0.948205	0.874994	0.601278	0.601708	0.88479	1.03811	1	1.08298	1.04228	1.01265	0.755268	0.695966	0.804859	0.774228		-0.318574	0.871734	0.141851		-0.675753	0.743211	0.542725		-0.0756058	0.794621	0.179119		-0.263545
O95861-2	BPNT1	17		1	1.00023	0.972234	0.850477	0.606624	0.594603	0.909843	1.26957									1	1.00726	1.03716	0.89264	0.644216	0.629431	0.951603	1.27217										-0.155742	0.846207	0.115562						-0.249552	0.874355	0.110744
O95861	BPNT1		30									1	0.892379	0.96598	0.893406	0.668765	0.709452	0.928021	1.15039									1	0.958428	1.05921	0.910584	0.789334	0.758987	0.998773	1.01543						-0.0791197	0.86962	0.0437921						-0.284307
O95865	DDAH2	7	7	1	1.01736	1.02851	0.973198	0.620738	0.654309	0.798916	0.716324	1	0.961961	1.04154	0.890703	0.649814	0.725768	0.826187	0.459055	1	1.0073	1.0409	0.899301	0.65537	0.648214	0.752868	0.512922	1	1.06582	1.14749	1.05654	0.880632	0.839557	0.718017	0.364687		-0.81512	0.697572	0.906589		-1.02491	0.665206	0.72528		-0.124292	0.634191	0.890046	19.7653	-0.0844794
[truncated: 8,633 more rows]
[truncated: 24 more columns]
