# Supplementary material for: Assessing target engagement using proteome-wide solvent shift assays
Source: eLife. 2021 Dec 8;10:e70784. doi: 10.7554/eLife.70784 (PMC8654358; doi:10.7554/eLife.70784)
Supplement: Figure 2—source data 3. — N = 2. [file elife-70784-fig2-data3.xlsx]

## Sheet: legend
The table contains two repeat experiments.
Each repeat experiment is in one single TMTpro-16plex group.
Each replicate contains a DMSO-treated 8-concentration SPP experiment and a MK2206-treated 8-concentration SPP experiment.
	Vehicle								MK2206
AEA (%)	0	3	6	9	12	15	18	21	0	3	6	9	12	15	18	21
TMTpro labeling	126	127N	127C	128N	128C	129N	129C	130N	130C	131N	131C	132N	132C	133N	133C	134N
Peptides	The number of quantified peptides
norm_rel_fc	Protein quantifications (scaled to the first concentration, then normalized by TPP package to account for technical errors)
meltPoint	Denaturation concentration determined by TPP pacakge
slope	Curve slope determined by TPP pacakge
plateau	Curve plateau determined by TPP pacakge
R_sq	Curve R2 determined by TPP package
diff_meltP_MK2206_vs_Vehicle	Difference between this protein’s denaturation concentration in DMSO experiment and MK2206 experiment
min_slope_MK2206_vs_Vehicle	Minimum slope of this protein′s fitted curves in DMSO experiment and MK2206 experiment
pVal_adj_MK2206_vs_Vehicle	Benjamini-Hochberg–adjusted P value of this protein’s denaturation concentration difference between DMSO experiment and MK2206 experiment
passed_filter_MK2206_vs_Vehicle	Did this protein meet the quality criteria (R2 > 0.8, plateau <0.3) in DMSO experiment and MK2206 experiment?
diff_meltP_Vehicle_1_vs_Vehicle_2	Difference between this protein’s denaturation concentration in the two DMSO experiments
min_pVals_less_0.1_and_max_pVals_less_0.2	Is one of the P values for the two replicate experiments <0.05 and the other one <0.1?
meltP_diffs_have_same_sign	Do the denaturation concentration shifts in the two DMSO vs MK2206 experiments have the same sign?
meltP_diffs_T_vs_V_greater_V1_vs_V2	Are both the denaturation concentration differences in the DMSO vs MK2206 experiments greater than the denaturation concentration difference between the two DMSO experiments?
minSlopes_less_than_0.06	Is the minimum slope in each of the DMSO vs. MK2206 experiments <−0.06?
fulfills_all_4_requirements	Does this protein fulfill all of the four requirements above?
model_converged	Does the fitting of the sigmoidal curve succeed?
Pass_R2(0.8)&Plateau(0.3)	Does the curve have a R2 greater than 0.3, a plateau smaller than 0.3, a valid denaturation concentration, and a valid slope?
For details for column names and TPP package: Franken, H., Mathieson, T., Childs, D. et al. Thermal proteome profiling for unbiased identification of direct and indirect drug targets using multiplexed quantitative mass spectrometry. Nat Protoc 10, 1567–1593 (2015). https://doi.org/10.1038/nprot.2015.101

## Sheet: MK2206_SPP_8Concentrations_2Rep
Uniprot ID	Gene Symbol	Peptides_Rep1	Peptides_Rep2	norm_rel_fc_126_Vehicle_1	norm_rel_fc_127N_Vehicle_1	norm_rel_fc_127C_Vehicle_1	norm_rel_fc_128N_Vehicle_1	norm_rel_fc_128C_Vehicle_1	norm_rel_fc_129N_Vehicle_1	norm_rel_fc_129C_Vehicle_1	norm_rel_fc_130N_Vehicle_1	norm_rel_fc_126_Vehicle_2	norm_rel_fc_127N_Vehicle_2	norm_rel_fc_127C_Vehicle_2	norm_rel_fc_128N_Vehicle_2	norm_rel_fc_128C_Vehicle_2	norm_rel_fc_129N_Vehicle_2	norm_rel_fc_129C_Vehicle_2	norm_rel_fc_130N_Vehicle_2	norm_rel_fc_130C_MK2206_1	norm_rel_fc_131N_MK2206_1	norm_rel_fc_131C_MK2206_1	norm_rel_fc_132N_MK2206_1	norm_rel_fc_132C_MK2206_1	norm_rel_fc_133N_MK2206_1	norm_rel_fc_133C_MK2206_1	norm_rel_fc_134N_MK2206_1	norm_rel_fc_130C_MK2206_2	norm_rel_fc_131N_MK2206_2	norm_rel_fc_131C_MK2206_2	norm_rel_fc_132N_MK2206_2	norm_rel_fc_132C_MK2206_2	norm_rel_fc_133N_MK2206_2	norm_rel_fc_133C_MK2206_2	norm_rel_fc_134N_MK2206_2	meltPoint_Vehicle_1	slope_Vehicle_1	plateau_Vehicle_1	R_sq_Vehicle_1	meltPoint_Vehicle_2	slope_Vehicle_2	plateau_Vehicle_2	R_sq_Vehicle_2	meltPoint_MK2206_1	slope_MK2206_1	plateau_MK2206_1	R_sq_MK2206_1	meltPoint_MK2206_2	slope_MK2206_2
A0AV02-2	SLC12A8	2	4	1	1.07351	1.08358	0.999413	0.617946	0.296611	0.190501	0.0997266	1	0.916161	1.00596	0.929011	0.611102	0.326864	0.228026	0.107537	1	0.982031	0.989168	0.89604	0.677323	0.265103	0.141863	0.0991544	1	1.02992	1.03125	1.0604	0.702724	0.31107	0.189014	0.134039	12.9204	-0.151756	0.0871219	0.987763	13.0691	-0.116328	0.0201986	0.990956	13.0396	-0.142962	0.0240692	0.994358	13.2794	-0.173395
A0AV96	RBM47	4		1	1.01987	1.09487	1.01625	0.614441	0.285278	0.134948	0.0835218									1	1.06509	1.08974	1.05821	0.76121	0.267449	0.156842	0.107624									12.8629	-0.161055	0.0587221	0.9903					13.3227	-0.206792	0.110081	0.987629
A0AVF1	TTC26	13	8	1	0.994391	0.948226	0.888483	0.54931	0.236935	0.134794	0.0911079	1	1.00404	0.970172	0.899233	0.537389	0.171812	0.0810433	0.033608	1	0.975523	1.01119	0.955582	0.55661	0.211626	0.115859	0.0824485	1	0.984575	1.01113	0.89761	0.505049	0.185756	0.0808377	0.0478475	12.2753	-0.135443	0.0104402	0.997144	12.1073	-0.165214	0	0.997996	12.3375	-0.175538	0.0594607	0.99941	11.9638	-0.158875
A0AVK6	E2F8		4									1	0.986373	1.03216	0.943736	0.522812	0.219033	0.143984	0.121161									1	0.977671	0.877952	0.834413	0.494419	0.239127	0.153596	0.0810621					12.1327	-0.175825	0.101487	0.998957					11.8202	-0.124377
A0AVT1	UBA6	59	56	1	0.992271	1.00817	1.00987	0.697669	0.285826	0.0719157	0.0272945	1	0.974929	1.00313	1.01232	0.722622	0.341677	0.103286	0.0363058	1	1.00066	1.02207	1.01955	0.737736	0.310927	0.091047	0.0281147	1	0.978891	1.03193	1.02087	0.778504	0.341611	0.115311	0.0378436	13.2369	-0.172997	0	0.998583	13.5597	-0.157825	0	0.997551	13.5052	-0.170387	0	0.998354	13.8056	-0.165514
A0FGR8-6	ESYT2	25	22	1	1.01385	0.976632	0.920008	0.523675	0.196092	0.0907739	0.0572161	1	0.994663	0.965344	0.935794	0.512356	0.179699	0.0748375	0.0456141	1	0.992813	0.964305	0.928208	0.531489	0.193683	0.0930466	0.0652184	1	0.970821	1.01732	0.90233	0.515397	0.18011	0.0793643	0.0412437	12.1213	-0.161145	0.0109016	0.999355	12.0686	-0.173984	0.011523	0.99908	12.1616	-0.167028	0.0249124	0.998821	12.0183	-0.162444
A0JLT2	MED19	2	2	1	1.02545	1.00084	0.930652	0.48369	0.205122	0.0876636	0.0446544	1	1.06498	1.06122	0.941055	0.65389	0.201307	0.152885	0.0907289	1	1.13221	1.05668	0.957152	0.497868	0.173401	0.0841597	0.0440191	1	0.884163	0.86226	0.757556	0.480365	0.193334	0.114847	0.0642824	11.9662	-0.164296	0.0135227	0.999116	12.7308	-0.202707	0.0928794	0.991257	12.0158	-0.188831	0.0321098	0.986435	11.245	-0.127867
A0JNW5	UHRF1BP1L	26	14	1	1.00097	0.989229	0.897276	0.541441	0.181342	0.0674554	0.0214675	1	0.985235	0.982447	0.923417	0.556299	0.188606	0.063963	0.0255895	1	0.996504	0.94226	0.905918	0.673567	0.179309	0.0697749	0.0302685	1	0.995379	1.00346	0.939557	0.536607	0.198098	0.0691532	0.0308891	12.1379	-0.167405	0	0.998288	12.2795	-0.172439	0	0.998949	12.81	-0.195816	0.00429808	0.992349	12.2296	-0.169626
A0MZ66-3	KIAA1598	46	48	1	0.984104	1.00825	1.04709	0.871773	0.8827	1.05845	0.871215	1	0.978714	0.987783	1.04176	0.817934	0.623954	0.708487	0.704992	1	1.0038	1.02833	1.0143	0.816562	0.752091	0.790086	0.728892	1	0.976991	1.11202	1.04092	0.851909	0.601786	0.628963	0.625722		-0.02797	0.921778	0.312833		-0.813154	0.679145	0.963086		-0.528865	0.757023	0.975575		-0.931208
A0PJW6	TMEM223	4	2	1	0.979425	1.03906	0.92728	0.540183	0.174423	0.0753258	0.0399331	1	1.00634	1.01801	0.899791	0.544232	0.173745	0.0863782	0.0239384	1	0.945948	1.01578	0.92285	0.537147	0.167016	0.0671765	0.041921	1	0.97345	0.977784	0.873483	0.518843	0.204766	0.0688807	0.0360003	12.1887	-0.171459	0	0.998229	12.1504	-0.165799	0	0.998102	12.1523	-0.174013	0	0.997055	11.9853	-0.153968
A0PK00	TMEM120B	1	2	1	1.236	1.10311	1.1613	0.979284	0.435755	0.412213	0.224991	1	1.02875	1.00581	1.16129	0.674711	0.317414	0.172046	0.134389	1	0.963324	1.1211	1.14923	1.61481	0.386344	0.141154	0.091176	1	0.866541	0.950855	1.00734	0.594119	0.248004	0.174979	0.162742	14.6408	-0.235203	0.308473	0.900749	13.1487	-0.182351	0.135541	0.973814	14.8694	-0.957763	0.116159	0.797586	12.5008	-0.209719
A1A4S6	ARHGAP10	14	16	1	1.00229	0.930327	0.859542	0.416426	0.102928	0.0411113	0.0228904	1	0.983026	0.910367	0.870315	0.418032	0.111162	0.0521787	0.0374091	1	1.02791	0.989536	0.877949	0.457402	0.111978	0.0504145	0.0284426	1	0.979618	0.950957	0.872935	0.446408	0.130412	0.0505519	0.0280519	11.3189	-0.18296	0	0.995253	11.3703	-0.179868	0	0.993106	11.5832	-0.181519	0	0.997756	11.5287	-0.175435
A1A5B4	ANO9		1									1	1.0677	1.05902	0.621095	0.403764	0.175942	0	0.0361114									1	0.826099	0.695051	0.729884	0.347856	0.115719	0.0391491	0					10.2917	-0.147062	0	0.978387					10.3679	-0.15665
A1A5D9	CCDC64B		2									1	1.21408	1.06806	1.0686	0.745072	0.510087	0.325114	0.290421									1	0.992205	1.11434	1.08887	0.774999	0.438525	0.312175	0.274946					14.7326	-0.112553	0.241402	0.934584					14.174	-0.145074
A1IGU5	ARHGEF37	1	1	1	0.953287	1.0202	0.899129	0.711307	0.365524	0.327339	0.291446	1	1.19203	0.961216	0.930676	0.676895	0.42075	0.187705	0.0565434	1	0.908632	0.945023	1.07695	0.980207	0.428374	0.221337	0.19706	1	0.790126	0.986454	1.15785	0.521164	0.281451	0.184786	0.110198	13.6912	-0.119168	0.242734	0.986162	13.6715	-0.120407	0	0.962761	14.6711	-0.267215	0.200069	0.982053	12.1634	-0.262575
A1L020	MEX3A		1									1	1.0054	1.58636	1.50341	0.763246	0.380407	0.414705	0.342729									1	1.25502	2.02595	1.71236	0.954914	0.479591	0.354443	0.192712					12.5717	-0.530328	0.379203	0.64418					14.998	-0.180151
A1L0T0	ILVBL	18	21	1	1.02018	0.995181	0.918105	0.550945	0.251364	0.140212	0.0700349	1	0.950811	1.01443	0.911311	0.542714	0.255538	0.134677	0.0727817	1	0.986602	0.962241	0.893861	0.391715	0.238271	0.130936	0.0719221	1	0.996755	0.893145	0.888073	0.572926	0.231043	0.134597	0.0784692	12.4024	-0.139161	0.00938056	0.999489	12.3579	-0.137209	0.00522712	0.997658	11.4288	-0.167751	0.07657	0.995183	12.3841	-0.135894
A1L170-2	C1orf226		3									1	1.01085	1.08445	0.878465	0.776076	0.444323	0.375057	0.207886									1	1.06827	1.07322	1.07134	0.72058	0.432486	0.328755	0.1861					14.8819	-0.0841655	0	0.976727					14.2005	-0.120776
A1L390	PLEKHG3	7	10	1	1.04995	1.0914	1.04933	0.564841	0.159986	0.0453405	0.0268563	1	1.00586	1.03482	1.01449	0.584169	0.154292	0.0646894	0.0547245	1	1.02646	1.02255	0.984028	0.551914	0.171913	0.0561328	0.0348112	1	0.989278	1.06368	0.941627	0.533487	0.177787	0.0595337	0.0342341	12.3408	-0.229979	0.0259109	0.990298	12.377	-0.238185	0.0492203	0.998589	12.2952	-0.199602	0.0171165	0.998936	12.1843	-0.17771
A1L3X0	ELOVL7	2		1	1.04274	1.02412	0.977278	0.632112	0.28291	0.0574335	0									1	1.10119	0.91811	0.936708	0.647737	0.2225	0.0600991	0.0147597									12.8975	-0.16852	0	0.994993					12.7994	-0.180147	0	0.986456
A1X283	SH3PXD2B	27	35	1	0.981313	1.00831	1.05199	0.872225	0.730347	0.162776	0.0322216	1	0.992098	0.986531	1.01539	0.798129	0.591909	0.356207	0.0526402	1	1.00105	0.991523	1.05024	0.953412	0.674926	0.280178	0.0534923	1	1.02885	1.05555	1.02963	0.846696	0.571297	0.376026	0.0683296	15.9952	-0.223585	0	0.984773	15.5284	-0.112958	0	0.975624	16.117	-0.162118	0	0.995574	15.6772	-0.114501
A1XBS5	FAM92A1	9	10	1	0.96159	1.01819	0.958882	0.661677	0.291034	0.0697626	0.0502766	1	0.933428	0.953754	0.962897	0.638986	0.360684	0.159964	0.0858575	1	0.968909	0.982529	1.00252	0.761426	0.314099	0.0939348	0.0468887	1	0.945155	1.03377	0.957026	0.744599	0.31953	0.150184	0.0942583	13.0642	-0.159475	0	0.997012	13.2914	-0.125852	0	0.992214	13.6146	-0.170154	0	0.99869	13.5567	-0.156667
A2A3N6	PIPSL	14		1	1.03197	0.995451	1.01292	0.737773	0.608844	0.483131	0.258113									1	1.03461	1.01724	1.02713	0.721505	0.532917	0.394598	0.238683									16.4928	-0.0711494	0	0.975348					15.3658	-0.0849241	0.0767347	0.98532
A2PYH4	HFM1	1		1	1.13729	1.20116	1.26174	1.04154	0.751018	0.502916	0.108									1	1.14113	1.20152	1.20296	0.980551	0.585212	0.422789	0.171676									17.4286	-0.136764	0	0.869151					16.3062	-0.11759	0.0839416	0.89342
A2RRP1	NBAS	31	38	1	1.03763	0.999793	0.870653	0.411749	0.0956592	0.0541275	0.0285776	1	1.00817	0.979018	0.886939	0.444573	0.117044	0.0586744	0.0539364	1	0.996959	0.964018	0.860811	0.36363	0.099569	0.0471932	0.0295841	1	0.997062	0.962563	0.892836	0.427697	0.11741	0.0631743	0.0472143	11.3379	-0.186139	0	0.997978	11.5478	-0.181435	0.00844522	0.998438	11.1055	-0.189612	0	0.998941	11.4883	-0.185937
A2RTX5	TARSL2	18	16	1	0.999993	1.07208	1.04888	0.764649	0.539635	0.379659	0.18841	1	0.905943	0.955088	0.966508	0.683625	0.389051	0.318363	0.184095	1	1.02875	1.07934	1.0844	0.910186	0.484976	0.366131	0.234953	1	0.992782	1.05778	1.03704	0.722379	0.415893	0.29	0.203998	15.4971	-0.0907052	0	0.980786	13.8094	-0.111945	0.135549	0.981336	15.0362	-0.149678	0.251422	0.978119	13.979	-0.129152
A2RU49	HYKK	4	1	1	0.94493	1.12198	1.04661	0.635062	0.243123	0.140017	0.0805276	1	0.909601	0.945267	0.862108	0.618145	0.289435	0	0	1	1.01178	1.00893	0.96698	0.824622	0.237179	0.120394	0.0655892	1	1.44134	1.4638	1.34458	1.1719	0.507927	0.11724	0	12.7864	-0.192156	0.0853887	0.98301	12.6661	-0.162632	0	0.972544	13.4637	-0.235814	0.0730075	0.998613	15.0411	-0.361666
A2RU67	KIAA1467	3	3	1	1.02694	0.959861	0.96975	0.748206	0.399005	0.44793	0.307937	1	1.11825	1.14746	1.04864	0.703527	0.469478	0.33031	0.228445	1	1.04805	1.02091	1.01941	0.473402	0.591871	0.367362	0.249314	1	1.12378	1.05062	0.956756	0.733183	0.442336	0.30072	0.175372	13.7282	-0.171356	0.361291	0.980587	14.3528	-0.111163	0.18827	0.954026	11.8875	-0.260162	0.397434	0.919873	14.4381	-0.0995115
A2RUB1	C17orf104	2	2	1	1.02803	1.00834	1.05607	0.776408	0.6111	0.508279	0.41358	1	0.999328	0.937457	1.08298	0.735966	0.447161	0.384581	0.338126	1	1.09333	1.0121	1.1271	0.903218	0.535562	0.48682	0.411041	1	0.930713	1.11262	1.03324	0.734528	0.412324	0.366681	0.354501	17.3975	-0.0807885	0.380661	0.979427	13.9294	-0.155366	0.354363	0.980401	15.7606	-0.146694	0.435792	0.954923	13.54	-0.184971
A2RUC4	TYW5	5	8	1	1.04573	1.01081	1.04187	0.720184	0.347167	0.115833	0.05364	1	1.01028	1.05245	1.05873	0.750618	0.317251	0.108503	0.0417976	1	0.999932	1.00789	1.10664	0.877739	0.327248	0.124277	0.0712561	1	0.955781	1.05468	1.07355	0.787885	0.31252	0.118119	0.0388057	13.6088	-0.153409	0	0.994725	13.6168	-0.167758	0.000399222	0.994121	14.021	-0.213126	0.0638507	0.991165	13.7273	-0.179
A2VDJ0-5	KIAA0922	7	8	1	1.02945	1.00397	0.935269	0.618457	0.273482	0.146458	0.0595794	1	0.967581	0.965315	0.95989	0.561348	0.253321	0.132637	0.069487	1	1.02898	1.01779	1.005	0.649676	0.266832	0.113808	0.0569276	1	0.985889	1.01125	0.947274	0.594657	0.239382	0.115103	0.0691207	12.8468	-0.139181	0	0.998864	12.4966	-0.153516	0.0361604	0.997498	12.9861	-0.165135	0.0249324	0.998203	12.6092	-0.156988
A3KMH1	VWA8	52	47	1	0.986535	0.991417	0.89127	0.454384	0.141628	0.0610025	0.0391649	1	0.959831	0.992424	0.894877	0.46593	0.135371	0.0572814	0.0444512	1	1.00642	1.00728	0.910905	0.451308	0.143461	0.0648332	0.0405993	1	0.988327	0.990298	0.909755	0.458481	0.135699	0.0587771	0.0424299	11.6399	-0.17382	0	0.999487	11.6968	-0.176073	0	0.998045	11.6781	-0.181759	0.0104293	0.999854	11.7013	-0.18315
A3KN83	SBNO1	27	39	1	1.02091	1.02781	1.03278	0.747499	0.238282	0.0599962	0.0358119	1	0.988331	0.972329	0.974744	0.710479	0.336429	0.0586019	0.0217608	1	1.03127	1.04084	1.0661	0.817346	0.306749	0.0832422	0.0404306	1	0.992965	1.01173	1.00099	0.791111	0.357209	0.0710172	0.0274592	13.2676	-0.205082	0.0123122	0.997999	13.4148	-0.165392	0	0.995265	13.7771	-0.195308	0.0122695	0.994651	13.8536	-0.176149
A4D126	ISPD	3	1	1	1.14665	1.07813	1.0529	0.788949	0.460987	0.115639	0.0612956	1	0.938754	0.757395	0.89067	0.723389	0.448477	0.34102	0.227707	1	1.04064	1.08499	1.21257	1.21145	0.433249	0.164822	0.0580594	1	0.903246	0.93532	0.997721	0.946918	0.560342	0.336767	0.230108	14.3425	-0.150575	0	0.972585	14.5184	-0.080297	0	0.894362	14.8692	-0.541662	0.11052	0.934833	15.5742	-0.14436
A4D1E9	GTPBP10	23	27	1	0.975289	0.961267	0.870755	0.490925	0.187252	0.0684848	0.0331972	1	1.00473	1.02584	0.882953	0.528853	0.232308	0.105686	0.0488574	1	1.02098	0.997667	0.892564	0.531459	0.219692	0.0833389	0.0337016	1	1.03283	0.982734	0.897974	0.52971	0.238797	0.109482	0.0538604	11.8075	-0.157115	0	0.997322	12.1376	-0.143389	0	0.998812	12.1394	-0.152674	0	0.998697	12.1987	-0.142966
A4D1P6	WDR91	7	10	1	0.998634	1.08355	1.04398	0.73936	0.290002	0.113884	0.0543397	1	0.995531	1.05145	1.09718	0.77049	0.331367	0.162247	0.0966907	1	1.00174	0.967608	1.00951	0.765172	0.302985	0.114579	0.0419655	1	0.979748	0.980514	0.9741	0.735459	0.279639	0.13284	0.101035	13.4368	-0.176763	0.0284701	0.992586	13.6947	-0.172948	0.0799347	0.988818	13.602	-0.172047	0.00824781	0.998778	13.3157	-0.181643
A4D1U4	LCHN	3	3	1	0.936822	0.957666	0.929347	0.548255	0.22165	0.11984	0.0966527	1	1.06527	0.999823	0.915747	0.52888	0.199486	0.0907775	0.0595566	1	1.00802	1.05146	0.997541	0.522932	0.276103	0.0998385	0.0821396	1	1.07566	1.03494	0.929745	0.534423	0.226761	0.0935049	0.0592109	12.2809	-0.16054	0.0545639	0.994752	12.1464	-0.158504	0.00806683	0.996675	12.3582	-0.165476	0.0582292	0.99294	12.2612	-0.154295
A4D2B0	MBLAC1		1									1	0.924726	0.9418	1.31693	0.764069	0.34334	0.39288	0.27979									1	0.967203	1.83501	1.24328	0.783713	0.433248	0.329317	0.265515					12.7807	-0.373652	0.33717	0.87992					14.1165	-0.15762
A4D997	ERCC6L2		1									1	1.30641	1.38757	1.01866	0.590013	0.107751	0.0460537	0									1	0.886147	0.687967	0.771672	0.17158	0.100737	0	0					12.3595	-0.259237	0.0113571	0.893754					10.1318	-0.233112
A4UGR9	XIRP2		2									1	1.15026	0.998172	1.03297	0.511529	0.192171	0.0998837	0.111044									1	1.01299	1.01794	1.00381	0.480512	0.204386	0.155559	0.119068					12.0844	-0.251175	0.110348	0.982169					11.9393	-0.240417
A5A3E0	POTEF	83	106	1	0.687479	0.97586	0.727435	0.528038	0.651822	0.507111	0.236448	1	1.0292	1.01546	0.984245	0.740612	0.541749	0.516222	0.343421	1	0.713133	0.731365	0.744545	0.592203	0.633679	0.498891	0.293337	1	1.00967	1.0058	1.0151	0.774788	0.533108	0.44398	0.294574	15.0415	-0.0598712	0	0.646465	16.3704	-0.0754946	0.277483	0.981208			0	0.666805	15.7555	-0.086738
A5D8V6	VPS37C	3	3	1	1.07953	1.08705	1.10558	0.830683	0.790655	0.83292	0.628476	1	0.939231	0.908541	1.03227	0.701621	0.473439	0.342963	0.344707	1	1.03552	1.17819	1.07555	1.88606	0.691298	0.628235	0.531511	1	0.892874	0.932444	0.879935	0.647936	0.451387	0.357391	0.267703		-0.0333996	0.564898	0.768707	14.0843	-0.129262	0.326143	0.972778		-0.459921	0.57987	0.35107	14.3285	-0.0747058
A5PLL7	TMEM189	1	3	1	0.945829	0.981472	1.05343	0.727362	0.647742	0.287659	0.229706	1	1.07526	0.993979	1.11798	0.797415	0.496067	0.430541	0.381365	1	1.02132	1.11228	1.40462	1.08464	0.533584	0.449266	0.278248	1	0.922964	1.05833	1.00452	0.667493	0.424584	0.37909	0.322268	15.6524	-0.0903333	0	0.959688	14.7735	-0.141517	0.394917	0.967256	15.1572	-0.333484	0.362061	0.814525	13.5467	-0.144823
A5PLN9-5	TRAPPC13	7	6	1	1.00229	1.02485	0.992655	0.649719	0.240952	0.0991177	0.0591663	1	0.99945	1.08623	1.05803	0.634075	0.285782	0.119861	0.0505114	1	1.0384	0.989998	0.984021	0.692	0.285837	0.113174	0.0531418	1	0.965169	0.967327	0.927858	0.547832	0.24162	0.0834488	0.0477588	12.8828	-0.1774	0.0322688	0.999334	13.0066	-0.164045	0.027571	0.988239	13.2434	-0.158743	0.00433386	0.998722	12.3507	-0.152599
A5YKK6-2	CNOT1	1		1	0.892025	0.744399	1.03175	0.371924	0.37106	0.202212	0.0526172									1	1.1114	1.06865	0.955436	0.536426	0.253253	0.222254	0.123686									11.5072	-0.257572	0.191328	0.875078					12.2822	-0.165115	0.138115	0.983651
A5YKK6	CNOT1	94	88	1	1.0011	0.992502	0.932889	0.540248	0.166992	0.0517172	0.0309926	1	1.00649	0.985244	0.918753	0.534139	0.179797	0.0490765	0.0263339	1	0.997415	1.01022	0.936162	0.522294	0.179982	0.0582139	0.0318641	1	0.998871	0.957599	0.920786	0.521762	0.17898	0.0568125	0.0271897	12.1848	-0.182083	0	0.999578	12.1449	-0.175484	0	0.999024	12.1233	-0.175734	0	0.999816	12.087	-0.173418
A5YM69	ARHGEF35	1	2	1	0.878271	0.998113	1.17305	0.878853	0.892593	1.04108	0.810183	1	1.10139	1.18872	1.00568	0.871704	0.710711	0.705781	0.734358	1	0.927687	1.01157	1.12704	0.656447	0.722686	0.75548	0.672189	1	0.808409	0.835789	0.943571	0.884475	0.500855	0.466246	0.406753			0	0.160679		-0.654945	0.71695	0.810737		-0.164149	0.699372	0.861342	15.1373	-0.160486
A6NC57	ANKRD62	2		1	1.16229	1.0686	1.0958	0.765359	0.497514	0.0577942	0.0312933									1	1.0667	0.935651	1.12501	1.04437	0.443337	0.135185	0.0297156									14.3395	-0.159994	0	0.956878					14.8324	-0.311185	0.0654097	0.978208
A6NCD4	C10orf131		1									1	1.02662	1.06284	0.936706	0.522986	0.229845	0.114897	0.042796									1	0.920028	0.977348	0.998851	0.560568	0.236988	0.0914671	0.0450467					12.2406	-0.152715	0.00597352	0.995935					12.4856	-0.171053
A6NCE7	MAP1LC3B2	1	5	1	1.03804	1.11654	1.12768	1.05173	0.83622	1.06109	0.643714	1	1.04988	1.02069	1.04987	0.731286	0.526486	0.537902	0.381601	1	1.04385	1.0911	0.957708	0.731621	0.723741	0.579172	0.406162	1	0.909874	0.936478	0.955882	0.789557	0.493813	0.407738	0.294814		0	0	0.659394	15.7006	-0.115784	0.441476	0.966973	19.2915	-0.0498419	0	0.941631	15.3049	-0.0930869
A6ND36	FAM83G	13	15	1	0.984639	0.964035	0.995216	0.759689	0.490927	0.179485	0.0434911	1	1.03322	1.05482	1.11281	0.778757	0.488141	0.250892	0.0738169	1	1.0553	1.03573	1.05436	0.816807	0.457607	0.193592	0.0406645	1	1.0134	1.07225	1.03047	0.761956	0.4188	0.218844	0.0656282	14.4188	-0.132747	0	0.990166	14.7241	-0.12485	0	0.97818	14.5507	-0.144187	0	0.991017	14.2306	-0.130024
A6NDB9	PALM3	2	5	1	0.963149	1.01164	1.05395	0.867013	0.633522	0.446913	0.201809	1	1.00118	0.972318	1.03797	0.747442	0.523333	0.325048	0.177009	1	1.06965	1.07348	1.17393	0.721593	0.523383	0.357368	0.226591	1	1.07653	1.14078	1.11746	0.840623	0.509762	0.272861	0.106337	16.6311	-0.0927129	0	0.984821	15.1041	-0.0959336	0	0.990183	14.9326	-0.106586	0.179002	0.939935	15.1294	-0.124048
A6NDE4	RBMY1B		2									1	1.01799	1.00076	0.889898	0.4725	0.196002	0.104845	0.0173154									1	1.038	0.961986	0.858104	0.428469	0.178802	0.115486	0.0629197					11.8116	-0.155456	0	0.99879					11.4525	-0.155926
A6NDG6	PGP	18	17	1	0.998541	0.993328	1.03664	0.874175	0.881138	1.10506	0.923745	1	0.992589	0.984873	0.939393	0.750292	0.627433	0.717577	0.72646	1	1.02868	1.01682	1.02251	1.11754	0.82449	0.797384	0.751601	1	0.959058	0.955981	1.00838	0.894594	0.625772	0.622945	0.606052		-0.020364	0.949406	0.138877		-0.0926873	0.692368	0.954519		-0.213947	0.774486	0.867849		-0.162076
A6NDU8	C5orf51	4	6	1	1.07061	1.24054	1.22745	0.865541	0.528181	0.270603	0.1056	1	0.97565	1.00258	0.982797	0.648335	0.336909	0.170604	0.074277	1	0.976957	1.19417	1.17907	0.917028	0.457444	0.221065	0.0908987	1	0.984773	1.01248	0.977217	0.669725	0.32809	0.182744	0.0979633	15.2903	-0.130833	0.00809312	0.911055	13.296	-0.130928	0	0.9981	14.8172	-0.170458	0.0756684	0.945123	13.3281	-0.136161
A6NED2	RCCD1	3	2	1	1.01798	1.00873	0.989761	0.697144	0.422094	0.212548	0.105354	1	0.924234	0.995132	0.940207	0.597375	0.442995	0.221386	0.13869	1	0.950993	1.02876	1.03669	0.647717	0.423153	0.202282	0.107738	1	1.00954	0.978495	0.970751	0.747566	0.428937	0.217945	0.0994572	13.9504	-0.11669	0	0.997459	13.507	-0.101827	0	0.985959	13.7687	-0.117031	0	0.986205	14.1936	-0.120004
A6NEE1	PLEKHD1		1									1	0.672877	1.05398	0.960535	0.764341	0.350207	0.122164	0.14588									1	0.702069	0.970087	0.735975	0.658642	0.315757	0.185544	0.077233					13.6772	-0.163597	0.0839573	0.888121					12.5005	-0.105367
A6NFI3	ZNF316		4									1	1.07306	1.07867	1.0008	0.458673	0.18245	0.0757637	0.0338775									1	1.095	1.11296	0.979784	0.414082	0.166378	0.0569445	0.0118631					11.8896	-0.212461	0.0479373	0.989972					11.6699	-0.213434
A6NGB9	WIPF3	4	4	1	1.0918	1.18373	1.27378	0.986649	1.01305	1.12593	0.856667	1	0.958932	1.04045	0.995681	0.76373	0.484071	0.561619	0.457578	1	1.03289	1.12601	1.03371	1.05878	0.796678	0.78827	0.621324	1	0.936359	1.04292	0.930888	0.77663	0.481752	0.403973	0.353327		0	0	-0.124659		-1.23419	0.50109	0.978838		-0.0499009	0.566237	0.839897	15.0797	-0.100362
A6NGR9	MROH6	3	3	1	1.06974	1.00382	0.901465	0.497332	0.171007	0.0744224	0.0304274	1	0.996768	0.97658	0.994944	0.632234	0.25486	0.146605	0.0691657	1	1.04228	1.00442	0.833466	0.519221	0.176717	0.104196	0.0452478	1	1.09437	1.07867	1.05292	0.615997	0.257739	0.151019	0.084831	11.9132	-0.166595	0	0.996247	12.8531	-0.167032	0.0555183	0.998454	11.8094	-0.145224	0	0.994783	12.7461	-0.185239
A6NHL2	TUBAL3	1		1	1.11101	1.60126	1.33021	0.835127	0.270754	0.0759411	0.0356643									1	1.12696	1.33504	1.06508	0.617768	0.307452	0.122758	0									13.6937	-0.225776	0.0275719	0.802148					13.0401	-0.157335	0	0.919731
A6NHP3	SPDYE2B	1	1	1	1.05517	1.23523	1.02986	0.679656	0.170862	0.0413068	0	1	1.13844	0.973569	0.831359	0.527119	0.260407	0.0504026	0	1	1.04859	1.12814	1.19924	0.756285	0.264849	0.0613721	0	1	0.95163	1.39422	1.24974	0.557352	0.177095	0.150742	0	12.83	-0.224735	0	0.966569	11.9718	-0.144705	0	0.976858	13.4227	-0.20348	0	0.964236	12.2577	-0.287753
A6NHR9	SMCHD1	52	70	1	0.960712	0.920428	0.722307	0.266228	0.0774361	0.0586789	0.0310562	1	0.973282	0.915401	0.711901	0.237039	0.051649	0.0374006	0.0244493	1	0.989546	0.933756	0.715162	0.250596	0.0767971	0.0562183	0.0374852	1	0.991907	0.92553	0.698607	0.216354	0.0592751	0.0377813	0.0264874	10.2076	-0.18325	0	0.994509	10.0636	-0.200369	0	0.994539	10.1273	-0.190892	0.00902045	0.997063	9.96623	-0.203788
A6NHX0	GATSL2	2		1	1.16786	1.09808	1.22433	0.525733	0.275449	0.103177	0.0279329									1	0.891668	0.928155	0.991306	0.407829	0.204586	0.075394	0.0259828									12.3819	-0.214807	0.0798036	0.936418					11.6732	-0.210524	0.0531135	0.980358
A6NI28	ARHGAP42	7	7	1	1.05699	1.01896	1.05645	0.736781	0.402803	0.148366	0.0982357	1	0.942387	0.914344	0.915718	0.634282	0.319028	0.140654	0.0708118	1	1.03408	1.056	1.07049	0.771229	0.392956	0.180451	0.117417	1	0.915275	0.930228	0.964649	0.617866	0.274092	0.152888	0.0756086	13.9505	-0.139082	0.0129117	0.990765	13.0138	-0.130819	0	0.988742	14.0204	-0.148194	0.0676361	0.990264	12.8559	-0.147314
A6NIH7	UNC119B	10	16	1	0.995795	0.9829	1.05134	0.85948	0.867474	1.05154	0.71012	1	1.00348	0.999771	1.08585	0.823882	0.610143	0.630098	0.632019	1	1.02538	1.0817	1.05797	0.840178	0.751255	0.73776	0.650207	1	0.972304	1.15786	1.10876	0.864953	0.585885	0.584087	0.580175		0	0	0.562038		-0.885565	0.624087	0.972404		-0.0651714	0.689419	0.920525		-0.241815
A6NIL9	CRYM-AS1	2	2	1	1.44883	1.40475	1.61681	1.489	1.45914	2.6032	0.424793	1	0.665931	0.787649	0.808558	0.639263	0.81185	0.912217	0.473327	1	1.04093	1.08599	1.04738	1.099	1.07321	0.956724	0.548105	1	1.0168	0.718023	0.910593	0.910539	0.633317	1.01025	0.383084			1.5	0.0821467			0.72765	0.335925		-0.567669	0.548099	0.884792		-0.899629
A6NJ78	METTL15	7	12	1	0.9265	0.895804	0.79851	0.396799	0.0916921	0.0232505	0.0154882	1	0.997599	0.995332	1.03974	0.489828	0.111958	0.030903	0.018425	1	1.014	0.974797	0.841765	0.369806	0.107753	0.0322489	0.0106905	1	1.03128	1.11434	0.952351	0.467372	0.139226	0.0384882	0.0201328	10.9642	-0.175669	0	0.98375	11.9913	-0.274107	0.0264217	0.997726	11.0651	-0.186079	0	0.998822	11.8496	-0.200442
A6NKB5	PCNXL2	1	1	1	1.08492	1.32001	1.20403	1.30405	1.87843	1.31469	0.469425	1	1.28107	0.788565	1.15522	1.05888	0.7749	0.730204	0.575684	1	1.12225	1.06016	1.46567	4.9826	1.07469	1.05812	0.788204	1	1.23305	1.75552	1.49046	1.44645	0.844333	1.05448	0.955023		1.53844	1.24844	0.0619454		-0.544287	0.847241	0.221454		0.550001	1.5	0.0393178
A6NKD9	CCDC85C	5	5	1	1.06024	1.03521	1.01506	0.785313	0.528357	0.238864	0.10827	1	1.02201	0.989686	1.03314	0.717253	0.371256	0.190367	0.0793321	1	1.06766	1.03752	1.04508	0.774354	0.449581	0.241726	0.118	1	1.03266	1.09228	1.01826	0.689869	0.383407	0.186655	0.0744274	14.8931	-0.11797	0	0.990624	13.7972	-0.134212	0.0103253	0.995718	14.504	-0.121028	0.0139705	0.989988	13.7201	-0.12899
A6NKF1	SAC3D1	6	4	1	1.04918	1.05173	1.02671	0.65598	0.26816	0.121646	0.0702543	1	0.950073	1.00991	0.950186	0.577529	0.215654	0.065615	0.00477171	1	0.991032	1.08581	0.933114	0.66356	0.233811	0.109478	0.0804205	1	0.995546	1.11033	1.02277	0.669626	0.228206	0.076364	0.0236174	12.9977	-0.17251	0.0493887	0.994253	12.4702	-0.174271	0	0.997153	12.8895	-0.173102	0.0427303	0.99254	12.9631	-0.186774
A6NKZ8		1	2	1	0.553752	0.473811	0.314218	0.178773	0.0536308	0	0.0168633	1	0.81136	0.688595	0.675544	0.420127	0.162566	0.162752	0.132333	1	1.12695	0.606788	0.645272	0.163284	0.0602296	0	0	1	0.903971	1.05551	0.708863	0.347618	0.201648	0.193832	0.164107	3.70839		0	0.888522	9.3523	-0.108564	0	0.88049	7.89438	-0.152725	0	0.905641	10.3792	-0.168098
A6NNH0	GATSL1		2									1	0.925824	0.993754	0.881167	0.496811	0.184768	0.0760593	0.0192391									1	1.07187	0.906941	0.935711	0.534047	0.182839	0.0772451	0.0498255					11.8718	-0.160315	0	0.994553					12.1771	-0.172521
A6NNL5	C15orf61		1									1	1.00285	1.04139	0.916406	0.400452	0.0801741	0.0220077	0.0172908									1	1.02145	1.00564	0.782724	0.401974	0.147643	0.0435827	0.028848					11.4427	-0.217557	0	0.998553					11.0054	-0.159563
A6NNY8	USP27X	1	1	1	0.95266	1.10866	0.950603	0.537885	0.171385	0.0320603	0.0328901	1	1.10886	1.45263	1.18515	0.742763	0.267995	0.0945051	0.0168628	1	0.944618	0.789385	0.953804	0.376411	0.22215	0	0	1	0.800781	0.837121	0.778904	0.409011	0.188126	0.0837874	0	12.2042	-0.189297	0	0.990097	13.4035	-0.193481	0.00974131	0.877001	11.5373	-0.188696	0	0.952564	11.0284	-0.145807
A6NP81			2									1	1.08777	1.08257	1.15858	0.908581	0.557039	0.357114	0.0721717									1	0.961963	1.02825	1.10966	0.747295	0.479444	0.346894	0.117947					15.7432	-0.126047	0	0.954173					14.9051	-0.104714
A6QL63	BTBD11		3									1	1.03363	1.01177	0.938808	0.57922	0.321695	0.132034	0.0553166									1	0.915327	0.854649	0.825703	0.592663	0.30046	0.106967	0.0548843					12.7755	-0.133208	0	0.996845					12.4073	-0.125381
A6ZKI3	FAM127A	6		1	1.02185	0.963965	0.901279	0.466566	0.132989	0.039826	0.0231306									1	1.03402	1.00716	0.924869	0.433259	0.148716	0.0462597	0.0285912									11.7194	-0.185008	0	0.998112					11.6422	-0.188065	0.00431395	0.999012
A7E2V4-2	ZSWIM8	12	6	1	1.01199	1.01559	0.933659	0.540911	0.198757	0.0755321	0.0366634	1	1.00625	0.953823	0.885018	0.50863	0.177705	0.0806752	0.0593585	1	1.03768	1.03108	0.981687	0.53603	0.207139	0.084375	0.0323726	1	1.01893	0.999313	1.01288	0.568592	0.195148	0.0791631	0.0507102	12.2433	-0.166396	0	0.999653	11.9272	-0.156238	0	0.997407	12.2953	-0.177399	0.0162346	0.99732	12.4049	-0.201643
A7KAX9	ARHGAP32	9	11	1	0.970777	1.01997	1.01583	0.658876	0.418982	0.200587	0.132661	1	0.986142	1.05227	1.01844	0.606629	0.289639	0.168138	0.10018	1	0.993397	1.00697	0.966111	0.776064	0.38348	0.187993	0.102533	1	1.0598	1.00785	0.96917	0.634192	0.295943	0.13749	0.0800421	13.7481	-0.11779	0.0290355	0.992272	12.8183	-0.161899	0.0918926	0.994301	14.0309	-0.137252	0.0286827	0.999575	13.0086	-0.144037
A7MBM2	DISP2		3									1	0.978106	1.00929	1.03219	0.806703	0.496445	0.484224	0.623706									1	0.960767	1.00342	0.984568	0.757553	0.464375	0.405662	0.621423						-1.17426	0.534792	0.965498					12.517	-1.32772
A8CG34	POM121C	1	2	1	0.955041	0.966033	0.825038	0.497424	0.157768	0.0340384	0	1	0.90863	1.00076	0.940233	0.562498	0.308645	0.268786	0.227952	1	0.965395	0.795888	0.822524	0.687342	0.187854	0.0554916	0	1	0.949314	0.898862	0.87222	0.642506	0.309972	0.279131	0.173383	11.6278	-0.162958	0	0.990142	12.4753	-0.152548	0.21913	0.989683	12.8365	-0.191888	0	0.941784	13.1316	-0.101192
A8K855	EFCAB7	3	6	1	1.15328	1.09894	0.910093	0.693259	0.349493	0.203553	0.0873861	1	1.08342	1.01914	1.0127	0.578863	0.314782	0.229059	0.167053	1	1.00937	1.03673	0.89665	0.855516	0.267855	0.15343	0.083056	1	1.08974	1.03873	0.86561	0.540315	0.281593	0.17409	0.14015	13.5089	-0.120675	0	0.970944	12.6396	-0.168596	0.181168	0.989792	13.6604	-0.230769	0.0969249	0.989183	12.2816	-0.123905
A8K8P3	SFI1	1	1	1	0.841423	0.942928	0.723069	0.507344	0.335749	0.356015	0.285185	1	0.945176	0.623189	0.757432	0.298547	0.127168	0.0785575	0.0952984	1	1.02857	1.30648	0.915915	0.390925	0.0949663	0.135002	0.0683621	1	1.05023	0.911852	0.806419	0.257428	0.0672161	0.0947479	0	11.8929	-0.0942453	0.190736	0.95091	9.10969	-0.121278	0	0.875513	11.3485	-0.221809	0.0732193	0.943123	10.4789	-0.215112
A8MPS7	YDJC	3	7	1	1.00263	1.02431	1.05038	0.731192	0.636918	0.697953	0.405823	1	1.06851	1.0561	1.03667	0.697911	0.460604	0.451554	0.408772	1	0.906855	1.19266	1.06508	0.829477	0.470007	0.516769	0.376178	1	1.05701	1.06241	1.04103	0.737211	0.479443	0.355971	0.303835	20.3083	-0.0515851	0.251412	0.883813	13.606	-0.194562	0.432192	0.983505	14.4843	-0.184247	0.439927	0.907547	14.4763	-0.118865
A8MVW0	FAM171A2	6	3	1	1.11586	1.11347	1.17256	0.860265	0.632097	0.512634	0.289068	1	0.848597	0.865288	0.96416	0.730634	0.491662	0.451558	0.244987	1	1.00608	1.10807	1.05915	0.703517	0.539199	0.36216	0.259854	1	0.92003	1.05144	1.04999	0.873281	0.429397	0.301903	0.248427	17.2463	-0.0809978	0.0840089	0.910172	15.5076	-0.0738156	0	0.905124	15.0559	-0.0940943	0.170186	0.967012	14.4202	-0.170564
A8MW92	PHF20L1	2		1	1.02896	0.982524	0.907958	0.808733	0.795874	0.68139	0.212015									1	1.01839	1.05849	1.00571	0.832525	0.67321	0.670157	0.251347									18.5883	-0.100398	0	0.86812					18.2204	-0.0685527	0	0.910655
A8MWD9		6	11	1	1.0058	1.00908	1.01656	0.880209	0.905893	0.98946	0.784635	1	0.973417	0.97423	0.932274	0.699219	0.489642	0.539579	0.556625	1	1.01321	1.08897	1.08686	0.782284	0.666235	0.703811	0.665624	1	1.01792	1.0188	1.02481	0.776167	0.527271	0.501264	0.482033		-0.0123321	0	0.543877		-0.110321	0.518068	0.977351		-0.867978	0.678557	0.933826	16.8027	-0.151745
A8MWY0	KIAA1324L	3	1	1	0.943025	0.967162	1.01768	0.789317	0.595033	0.532062	0.226996	1	1.02615	1.23277	1.23832	0.704944	0.553601	0.409558	0.272298	1	1.00117	1.02313	0.990847	0.792991	0.596153	0.448736	0.268442	1	0.991988	0.941879	0.991746	0.781678	0.532127	0.274858	0.271805	16.7182	-0.0741938	0	0.954993	15.1368	-0.105139	0.267294	0.861886	16.4559	-0.075093	0	0.993948	14.989	-0.106354
A8MXV4	NUDT19	10	20	1	0.954727	0.932323	0.983471	0.82758	0.630229	0.161001	0.0237855	1	0.996375	1.04495	1.04158	0.760996	0.515493	0.270773	0.032662	1	1.02636	1.01217	1.02677	0.912483	0.640386	0.218377	0.02054	1	1.01091	1.05488	1.04134	0.797003	0.508375	0.251911	0.0323734	15.4578	-0.171127	0	0.974348	14.7491	-0.122008	0	0.98145	15.7433	-0.175987	0	0.994218	14.8182	-0.129937
A9UHW6-3	MIF4GD	8	7	1	0.92939	0.961628	1.00637	0.820633	0.58931	0.301967	0.0906138	1	0.959696	0.974204	1.10195	0.81688	0.520388	0.338171	0.114143	1	0.918086	0.979287	1.00228	0.906049	0.545067	0.301346	0.114451	1	1.0089	1.03252	1.08561	0.77115	0.501216	0.323855	0.135366	15.4804	-0.117115	0	0.983219	15.306	-0.110674	0	0.976548	15.542	-0.12451	0	0.989736	15.0389	-0.105427
B1AJZ9-3	FHAD1	1		1	1.12944	1.15994	1.20922	0.756268	0.407535	0.0607933	0									1	1.14206	1.12702	1.39995	0.912951	0.450772	0.101571	0.0391852									13.9438	-0.172803	0	0.941656					14.7078	-0.200878	0.00271855	0.891535
B1AK53	ESPN	14	6	1	0.968063	1.01915	1.01763	0.754376	0.504477	0.424445	0.32925	1	1.01996	1.01431	1.01861	0.724817	0.458011	0.408883	0.354734	1	0.981086	1.06653	1.04517	0.808685	0.452731	0.308218	0.286496	1	1.0127	0.977662	0.943055	0.767109	0.453878	0.349702	0.294599	15.0897	-0.104348	0.314928	0.992079	14.1503	-0.13807	0.366352	0.996172	14.4033	-0.143415	0.265042	0.990585	14.5626	-0.110439
B2RTY4-4	MYO9A	2	4	1	1.01073	1.00079	0.909852	0.509205	0.17623	0.0632183	0.0758907	1	0.884332	1.02824	1.07493	0.549453	0.249473	0.128604	0.0506257	1	0.888168	0.946162	0.968214	0.583731	0.190691	0.10167	0.0475853	1	0.992162	1.11193	1.00341	0.525586	0.219646	0.135401	0.0592584	11.9815	-0.169722	0.0185233	0.998733	12.4451	-0.191801	0.0747204	0.97743	12.4567	-0.186096	0.0346435	0.9871	12.2397	-0.189329
B3EWG4	FAM25B	1	1	1	1.35437	1.2463	1.48479	1.34341	1.6022	1.54761	1.27287	1	0.949433	1.62686	1.21489	1.23092	0.742983	0.862633	0.699921	1	1.26014	1.32306	1.65726	1.31685	1.18914	1.19754	1.11003	1	1.02333	1.26682	1.48741	1.36346	0.920799	0.893801	0.857474			1.5	0.598432		-0.137641	0.765258	0.221445			1.5	0.285424		-0.115139
B5MCY1	TDRD15	2		1	0.937479	0.802945	0.813192	0.59678	0.442814	0.174655	0.0843153									1	1.10287	1.03981	1.14861	0.803742	0.336312	0.243677	0.180013									12.8325	-0.100105	0	0.928494					13.6777	-0.195143	0.193689	0.969502
B5ME19	EIF3CL	69		1	0.954856	0.980678	0.89037	0.486748	0.10601	0.0238937	0.016679									1	0.970966	0.990762	0.92124	0.522534	0.128283	0.0332236	0.0196612									11.7802	-0.196236	0	0.995426					12.0434	-0.199272	0	0.998101
B7Z6K7	ZNF814		2									1	1.26267	1.27965	1.21387	0.727093	0.548733	0.358096	0.285543									1	1.02952	1.27632	1.13974	0.685735	0.378983	0.278319	0.254498					15.0202	-0.109971	0.255256	0.823084					13.232	-0.182315
C9JI98	TMEM238		1									1	0.967338	1.06661	0.95422	0.45408	0.132813	0.0175387	0.0230783									1	0.906007	0.91846	0.813073	0.406244	0.16548	0.0339814	0.0186221					11.7892	-0.207905	0	0.995958					11.1535	-0.161752
C9JLW8	FAM195B	8		1	0.889035	1.06545	1.06404	0.965609	1.02226	1.15054	1.02195									1	1.01072	0.974997	1.03524	1.08847	0.800301	0.81428	0.855751										0.175046	1.04831	0.240888						-0.0891903	0.820568	0.842153
E7ERA6	RNF223	1		1	0.872568	1.00896	0.958181	0.742703	0.537249	0.443805	0.36216									1	1.29121	1.2956	1.3847	0.764801	0.564519	0.574221	0.502457									15.8561	-0.0809883	0.281217	0.96474						-0.268538	0.546478	0.658199
F8VTS6	RFPL4AL1	1		1	1.20038	1.1688	1.10333	0.599817	0.278242	0.171944	0.0925567									1	0.924838	0.956995	1.06451	0.674154	0.216028	0.154424	0.101508									12.7017	-0.189887	0.119109	0.943934					12.7876	-0.232052	0.118014	0.988903
I3L273		1		1	1.00697	0.918475	1.10163	0.760465	0.704136	0.524088	0.509799									1	1.12031	1.48886	1.3862	1.21632	0.769004	0.646787	0.503333										-0.0720273	0.471423	0.913357						-0.157044	0.565782	0.473348
O00115	DNASE2	9	6	1	1.00224	1.05103	1.05478	0.90415	0.93149	1.00365	0.893107	1	1.00978	0.978594	1.00988	0.78396	0.565066	0.577111	0.63149	1	1.01366	1.05281	1.09649	1.07283	0.807697	0.765178	0.780385	1	1.00721	1.06892	1.01738	0.840192	0.576079	0.553661	0.52179		-0.0261069	0.933161	0.494656		-1.03287	0.591223	0.989133		0	0.772781	0.870599		-0.131489
O00116	AGPS	38	51	1	0.982095	0.938502	0.916668	0.588405	0.203236	0.0693745	0.0343917	1	1.00286	1.03759	0.956662	0.640151	0.29057	0.102469	0.0294318	1	0.995686	0.953801	0.905065	0.629834	0.267432	0.0841044	0.037451	1	0.982238	0.96402	0.927407	0.646208	0.297938	0.104569	0.0372291	12.4533	-0.16775	0	0.995442	12.9813	-0.153	0	0.997876	12.7853	-0.152451	0	0.995223	12.9965	-0.147647
O00124	UBXN8	5	4	1	1.02895	1.0453	0.996936	0.68254	0.297846	0.0455483	0.00493086	1	1.11356	1.14378	0.993018	0.602124	0.300638	0.200265	0.199411	1	1.03935	1.01674	1.04795	0.848879	0.278112	0.0810456	0.0194307	1	0.965677	0.975177	0.939132	0.632151	0.29906	0.151699	0.145457	13.1692	-0.175261	0	0.994507	12.676	-0.176493	0.185061	0.971696	13.7753	-0.217447	0.0117132	0.996895	12.9183	-0.143952
O00139-4	KIF2A	19	16	1	0.984158	0.94815	0.808098	0.367858	0.0669651	0.0253948	0.0142272	1	0.9457	0.936818	0.813532	0.398452	0.0952642	0.0228631	0.01209	1	0.998868	0.938466	0.811626	0.347428	0.0846249	0.0279001	0.012438	1	1.01705	0.928048	0.847592	0.39698	0.100676	0.027984	0.0179203	10.8808	-0.187743	0	0.995048	11.0471	-0.178999	0	0.991675	10.8352	-0.187991	0	0.99631	11.1871	-0.18498
O00142	TK2	2	6	1	1.038	1.16823	1.1061	0.909243	0.684136	0.445179	0.21256	1	1.32958	1.13824	1.34591	0.808129	0.442211	0.359454	0.233726	1	1.00202	1.06104	1.0832	0.886827	0.541303	0.341638	0.192924	1	1.05983	1.75265	1.25111	0.921971	0.476832	0.359962	0.243257	16.999	-0.0998105	0	0.946452	14.3809	-0.152291	0.265518	0.813175	15.5388	-0.119925	0.123443	0.985046	14.9179	-0.16653
O00148	DDX39A	12	11	1	1.12378	1.15223	1.10997	0.694993	0.242525	0.079693	0.0290971	1	0.977149	1.08314	1.07959	0.668609	0.243748	0.100843	0.0680234	1	0.996252	1.11517	1.082	0.638729	0.228666	0.07653	0.0271353	1	1.0246	1.11438	1.04326	0.65165	0.234389	0.100945	0.0690212	13.1042	-0.195711	0.0175624	0.968114	12.9466	-0.197022	0.0586167	0.988367	12.8338	-0.193344	0.0183455	0.984405	12.8473	-0.195276
O00151	PDLIM1	19	26	1	0.931093	1.02646	1.01836	0.820323	0.779361	0.850087	0.659917	1	0.989821	1.03605	1.04221	0.785625	0.606322	0.670045	0.635612	1	0.953997	1.0147	0.999497	0.904809	0.664317	0.618493	0.570458	1	0.951799	1.0307	0.976758	0.798635	0.565201	0.53271	0.527237		-0.104123	0.762	0.798631		-0.919212	0.637326	0.979557		-0.0914669	0.577602	0.988291		-0.121697
O00154-7	ACOT7		33									1	1.00272	0.951227	0.917338	0.676071	0.421315	0.273418	0.0738054									1	0.989494	0.951961	0.91818	0.702353	0.410545	0.238512	0.0824053					13.8144	-0.106428	0	0.988914					13.8516	-0.1125
O00154	ACOT7	40		1	1.00498	1.01533	1.00545	0.774148	0.528483	0.282154	0.0732813									1	0.991071	0.972037	0.946729	0.709193	0.491939	0.261556	0.0760742									14.9126	-0.115158	0	0.990277					14.3244	-0.108376	0	0.988599
O00159	MYO1C	34	37	1	1.08433	1.12431	0.958234	0.411076	0.0886557	0.0397408	0.0277444	1	1.11426	1.15781	1.02957	0.444324	0.0816579	0.0316937	0.0206565	1	1.10013	1.16383	0.971956	0.358777	0.0989939	0.0449279	0.0286576	1	1.15353	1.23164	1.0362	0.416737	0.10116	0.0370363	0.0285218	11.5974	-0.243722	0.0207753	0.986989	11.8307	-0.323209	0.0306961	0.978719	11.4186	-0.267015	0.0363132	0.979348	11.7408	-0.322057
O00161	SNAP23	9	11	1	1.08938	1.14753	1.056	0.892074	0.800503	0.833873	0.663761	1	0.932345	0.950104	1.02777	0.728617	0.516104	0.509698	0.437611	1	1.05657	1.06101	1.07731	0.880874	0.673866	0.564007	0.502852	1	1.03554	1.05437	0.966209	0.809417	0.512019	0.454855	0.427738		-0.0296602	0.481748	0.7673	15.456	-0.142839	0.470547	0.974791		-0.0798978	0.479349	0.964181	15.4321	-0.125833
O00165-2	HAX1		4									1	0.976116	0.958268	0.874786	0.487024	0.162749	0.0754395	0.0372537									1	1.01839	0.948179	0.893102	0.483201	0.176772	0.0696837	0.0386455					11.7676	-0.161356	0	0.997288					11.8249	-0.162952
O00165	HAX1	9		1	1.09285	1.06452	0.940787	0.518598	0.15138	0.0675237	0.0313748									1	1.05815	1.01263	0.979994	0.579486	0.180474	0.0613772	0.0288385									12.0744	-0.1876	0.00745867	0.991578					12.4379	-0.192668	0.00828321	0.997524
O00170	AIP	22	31	1	0.959978	0.967508	1.02577	0.856774	0.795689	0.89453	0.436677	1	0.984481	1.0372	0.997812	0.756123	0.573436	0.589612	0.442515	1	1.00942	1.00453	1.00291	0.803605	0.729123	0.684456	0.449818	1	0.968008	0.990092	1.01592	0.807047	0.558854	0.509699	0.373122	20.6403	-0.150187	0	0.750518	20.2223	-0.0848715	0.471975	0.973406		-0.0453722	0	0.950675	16.6227	-0.0865401
O00178	GTPBP1	19	15	1	0.984895	0.97693	0.986013	0.672226	0.374395	0.177106	0.0788343	1	0.995357	1.00593	0.915827	0.616039	0.349693	0.172164	0.0592919	1	1.03006	0.997172	0.9453	0.651521	0.406035	0.186734	0.0763218	1	0.974482	0.893871	0.942366	0.625615	0.331847	0.16797	0.0557563	13.5558	-0.127055	0	0.997551	13.0502	-0.123202	0	0.997343	13.5223	-0.11844	0	0.995483	13.0857	-0.12892
O00180	KCNK1	1	1	1	1.30083	1.32116	1.34846	0.726158	0.466466	0.461375	0.110491	1	0.892788	1.28597	1.05505	1.09327	0.504548	0.297996	0.369436	1	1.15513	1.11684	0.993704	0.582262	0.555268	0.297011	0.0906634	1	1.06381	1.12233	1.32943	0.700021	0.402691	0.391847	0.196696	15.066	-0.107026	0.096807	0.76109	15.004	-1.52221	0.333716	0.887882	14.1661	-0.0956378	0	0.930388	13.415	-0.180782
O00186	STXBP3	10	16	1	1.02842	0.979289	0.968392	0.511743	0.142922	0.0518769	0.0308748	1	0.998731	1.01326	0.916908	0.545846	0.191792	0.0546346	0.0507552	1	1.00869	0.965431	0.87912	0.395536	0.161362	0.0554082	0.0281971	1	0.983064	0.94779	0.931533	0.559506	0.193637	0.0711185	0.0403044	12.0665	-0.208302	0.0165598	0.999138	12.2161	-0.167712	0	0.998872	11.3649	-0.172926	0	0.998809	12.3187	-0.168891
O00189	AP4M1	6	6	1	1.01003	1.01676	0.977656	0.558915	0.209617	0.0866629	0.0624755	1	0.994604	1.02835	0.96207	0.612671	0.223339	0.0925515	0.0723754	1	1.04989	1.01169	0.995006	0.547232	0.194346	0.0856492	0.0653601	1	0.90245	0.978749	0.930878	0.544262	0.221033	0.092494	0.0484381	12.3762	-0.182228	0.0394983	0.999389	12.6461	-0.175923	0.0372471	0.999217	12.2898	-0.200116	0.054899	0.997484	12.3033	-0.155494
O00192	ARVCF	9	7	1	1.01561	0.978251	0.919563	0.493152	0.192079	0.141034	0.0996889	1	1.09763	0.992253	0.961574	0.542141	0.19218	0.125963	0.0946867	1	1.02701	0.940579	0.876051	0.349819	0.184796	0.120854	0.0916962	1	1.05627	1.09867	0.982642	0.535632	0.189958	0.124263	0.0808389	11.9119	-0.171839	0.0798257	0.99903	12.2203	-0.194098	0.0845457	0.992735	11.0704	-0.194863	0.0937873	0.99605	12.2042	-0.204104
O00193	SMAP	6	11	1	0.92282	0.90412	0.970403	0.891005	0.87619	0.946625	0.849133	1	0.973151	0.980072	0.811164	0.627283	0.614339	0.688352	0.648215	1	1.02309	0.960816	0.940861	1.08358	0.781379	0.747014	0.744437	1	0.979393	0.722219	0.866327	0.799332	0.586051	0.53589	0.450864			0.788971	0.453324		-1.11249	0.644548	0.978899		-0.414219	0.745725	0.899623		-0.0449587
O00194	RAB27B		3									1	0.894203	1.07402	1.12085	0.832977	0.710186	0.707304	0.628341									1	0.931506	1.03124	0.982555	0.89048	0.517384	0.562313	0.501279						-0.110379	0.676091	0.848892						-1.1649
O00203	AP3B1	44	54	1	0.997361	1.00611	0.904416	0.477518	0.0957133	0.0211214	0.0128144	1	0.994134	1.00012	0.908457	0.474451	0.120063	0.0350965	0.0271745	1	1.00324	0.986502	0.909946	0.463863	0.11764	0.0270461	0.0162728	1	1.00062	0.95389	0.90224	0.465532	0.125539	0.0376394	0.0259855	11.7759	-0.207091	0	0.99795	11.7695	-0.192438	0	0.999062	11.7252	-0.197068	0	0.999035	11.7109	-0.187718
O00206	TLR4	3		1	0.994483	1.00979	1.04575	0.97274	0.870475	0.701568	0.662585									1	1.00651	1.03414	1.24496	1.14579	0.744915	0.731553	0.690665										-0.0662272	0.637994	0.983257						-0.390398	0.711109	0.717755
O00212	RHOD	4	2	1	0.992776	1.06971	0.914227	0.582256	0.270186	0.166813	0.126741	1	1.05808	1.26268	1.29046	0.744789	0.346723	0.220306	0.23885	1	1.05937	1.11343	1.13412	0.718697	0.301281	0.188279	0.148294	1	1.00256	1.17769	1.05696	0.674703	0.269939	0.184798	0.149664	12.5643	-0.139011	0.069103	0.995243	13.3393	-0.205678	0.229927	0.886675	13.2357	-0.194461	0.152303	0.971757	12.9241	-0.204124
O00213	APBB1	4	2	1	1.03238	1.07587	0.931843	0.662754	0.394463	0.292853	0.24465	1	0.924452	0.815558	1.04709	0.68466	0.297259	0.178659	0.127065	1	0.989636	1.05845	1.05032	0.685529	0.3795	0.235899	0.213348	1	0.887113	1.13542	0.984141	0.577819	0.299971	0.159136	0.126113	13.5831	-0.112974	0.185412	0.991792	13.1516	-0.175521	0.121696	0.956176	13.4483	-0.151284	0.19511	0.990539	12.6694	-0.154306
O00214-2	LGALS8	9	7	1	0.994242	1.02791	1.02839	0.834216	0.587182	0.357378	0.0940328	1	1.06387	1.03808	1.0834	0.789685	0.532417	0.331618	0.12911	1	0.99954	1.01054	1.03445	0.924934	0.56072	0.387551	0.148797	1	1.05198	1.02981	1.06853	0.850534	0.469543	0.301399	0.178582	15.6969	-0.111814	0	0.986547	15.2681	-0.106131	0	0.978785	16.0213	-0.109755	0	0.989167	14.8366	-0.133459
O00217	NDUFS8	12	15	1	0.990506	0.978765	0.918887	0.618488	0.223446	0.100393	0.0581301	1	0.98285	0.962552	0.914056	0.584519	0.216395	0.0902078	0.0721235	1	0.966391	0.982529	0.923291	0.611867	0.234806	0.0981463	0.0584828	1	0.991832	1.03625	0.974459	0.606555	0.233127	0.108428	0.0693035	12.661	-0.155871	0	0.998113	12.4554	-0.154539	0.00475228	0.997338	12.6586	-0.153664	0	0.997974	12.6548	-0.172115
O00219	HAS3	1	1	1	1.09201	1.18206	1.01997	0.524925	0.149657	0	0	1	0.935667	0.888066	1.13247	0.73077	0.469857	0.326168	0.0262942	1	1.0093	0.984451	0.928843	0.557682	0.137547	0.0300408	0	1	1.03366	1.24149	1.07338	0.911377	0.473406	0.333216	0.0358991	12.1711	-0.227207	0	0.975201	14.6014	-0.11751	0	0.937777	12.2345	-0.207439	0	0.998216	15.2186	-0.133848
O00220	TNFRSF10A	11	12	1	1.0136	1.05477	1.15305	0.960659	1.06147	1.20634	0.991207	1	1.06026	1.16978	1.1954	0.946418	0.684726	0.66305	0.718893	1	0.978523	1.04592	1.12495	0.963608	0.827899	0.881897	0.83243	1	0.97931	1.13746	1.15464	0.893	0.620054	0.579212	0.551059		0.0360527	1.07266	0.126601		-0.751646	0.68889	0.778495		-0.366944	0.847409	0.738155		-0.122602
O00221	NFKBIE	4	4	1	0.977096	1.06454	1.07384	0.828648	0.735953	0.657772	0.382115	1	0.993513	1.15022	1.03324	0.80904	0.504334	0.438059	0.252163	1	0.949507	1.0175	1.06683	0.82308	0.6139	0.479463	0.338798	1	0.977818	0.966888	0.99414	0.745158	0.469402	0.326588	0.23021	19.5376	-0.058325	0	0.929878	15.5009	-0.0973236	0.20017	0.957061	16.9114	-0.0798552	0.219597	0.977181	14.6129	-0.104689
O00231	PSMD11	63	51	1	0.983606	0.956297	0.973372	0.628505	0.194088	0.0368767	0.0150499	1	0.998948	1.01568	0.954774	0.653472	0.269746	0.0527088	0.0193055	1	1.00525	0.985908	0.937437	0.602728	0.252267	0.0473892	0.0151902	1	1.00196	0.927143	0.93208	0.658299	0.290246	0.064315	0.0170705	12.6664	-0.197705	0	0.998059	12.9461	-0.170816	0	0.997747	12.641	-0.167843	0	0.997206	13.0085	-0.16226
O00232-2	PSMD12	1		1	1.08048	0.987323	1.02181	0.537988	0.16052	0	0									1	1.01994	0.935361	1.04793	0.618026	0.238108	0.0387648	0.00203831									12.2389	-0.222066	0	0.993138					12.7547	-0.189505	0	0.991447
O00232	PSMD12	42	56	1	0.962532	0.942636	0.920909	0.635611	0.174974	0.0211879	0.0123773	1	0.98409	0.999377	0.93857	0.655584	0.29142	0.0804982	0.0321438	1	1.00468	0.988685	0.944926	0.649118	0.257987	0.0417479	0.0146403	1	1.00738	0.971749	0.970254	0.692796	0.302823	0.0835915	0.0297976	12.6276	-0.205347	0	0.993199	13.0201	-0.156852	0	0.997755	12.8815	-0.175259	0	0.997198	13.2561	-0.162645
O00233	PSMD9	19	14	1	0.946027	0.994457	1.04145	0.841458	0.919453	1.11068	0.963899	1	0.963365	0.954371	1.01173	0.770496	0.61147	0.700356	0.767701	1	0.960722	0.980945	1.02082	1.15482	0.754858	0.798341	0.772785	1	1.01518	1.07988	1.08191	0.860891	0.601628	0.604666	0.646388		-0.0108543	0.964837	0.0139378		-0.661396	0.693175	0.903826		-0.138396	0.773031	0.796366		-0.893721
O00244	ATOX1	4	8	1	1.12328	1.08141	1.13294	0.978982	0.989382	0.968119	0.789662	1	1.11015	1.20146	0.95646	0.670007	0.669167	0.812065	0.844566	1	1.05954	1.07766	1.21358	1.01748	0.831378	0.73825	0.690566	1	0.965594	0.735157	0.818104	0.770286	0.632578	0.538863	0.447014			0	0.528126		-0.644504	0.748951	0.703665		-0.0842895	0.704424	0.755814		-0.0470262
O00255	MEN1	4	3	1	0.97631	0.956013	0.87931	0.499649	0.179589	0.1007	0.0654294	1	0.97669	1.03151	0.952792	0.586776	0.197386	0.116752	0.0803714	1	0.979831	1.01744	0.973918	0.521802	0.195004	0.100105	0.0765228	1	1.07685	1.16596	1.0512	0.601883	0.251903	0.161118	0.0946305	11.8723	-0.1515	0.00376925	0.997193	12.4506	-0.185342	0.0618034	0.998406	12.152	-0.193785	0.0653505	0.999213	12.6371	-0.192952
O00257	CBX4	8	7	1	0.942177	0.924881	0.850415	0.539502	0.334677	0.349584	0.295225	1	0.901332	0.981699	0.897036	0.478222	0.261592	0.206351	0.18833	1	0.961294	0.884753	0.814336	0.457757	0.293933	0.279084	0.22006	1	1.03205	0.954551	0.919491	0.506771	0.233427	0.174008	0.19442	12.3257	-0.119882	0.269022	0.983126	11.813	-0.157696	0.167216	0.989265	11.5824	-0.125642	0.187168	0.981506	11.9713	-0.171441
O00258	WRB		4									1	1.02957	0.920158	0.799788	0.538182	0.217209	0.13219	0.120647									1	0.978877	1.07394	0.958561	0.548028	0.238536	0.133597	0.0740893					11.835	-0.121211	0	0.988533					12.3741	-0.161668
O00264	PGRMC1	10	13	1	0.953892	0.989468	1.05702	0.877994	0.907076	1.19728	0.910256	1	0.978812	1.02184	0.938818	0.697445	0.566766	0.629289	0.642315	1	0.988433	1.08189	1.03368	0.706044	0.795217	0.815307	0.759105	1	0.941491	0.981296	0.996361	0.841807	0.59148	0.578787	0.511995			0.982549	0.00274301		-0.10933	0.611611	0.978905		-0.146298	0.768598	0.888838		-0.107871
O00267-2	SUPT5H	53		1	1.02754	1.00856	1.0373	0.814873	0.390975	0.0958329	0.0500935									1	1.01437	0.988631	1.03736	0.87773	0.441633	0.12113	0.0503629									14.1164	-0.16888	0	0.996751					14.5725	-0.174312	0	0.998083
O00267	SUPT5H		47									1	0.998557	0.992721	0.980588	0.74336	0.433683	0.131745	0.0486407									1	0.977437	0.968589	0.98593	0.738285	0.421639	0.143846	0.0534474					14.0158	-0.140592	0	0.994999					13.9691	-0.138462
O00268	TAF4	9	12	1	1.01798	1.10786	1.07081	0.789537	0.421305	0.24722	0.147868	1	1.01873	1.01877	0.96747	0.648659	0.36085	0.193921	0.0868365	1	0.984465	1.05444	1.00738	0.742089	0.395904	0.219051	0.120827	1	1.03504	0.991757	0.973855	0.731275	0.365173	0.173955	0.0976653	14.2951	-0.137896	0.109107	0.982139	13.4044	-0.122007	0	0.998076	14.0052	-0.128964	0.0494838	0.995748	13.7656	-0.134136
O00273	DFFA	21	26	1	1.01025	1.06116	1.10587	0.863474	0.864008	0.913203	0.582736	1	1.00767	1.04137	0.991833	0.820979	0.595476	0.60156	0.507716	1	0.984103	1.08712	1.04455	0.94672	0.717402	0.673221	0.535061	1	0.973026	1.02622	1.01278	0.815819	0.562436	0.580544	0.413863		-0.0928363	0	0.738197		-0.093927	0.53069	0.984528		-0.0647511	0.513895	0.946902	17.9898	-0.0875515
O00287	RFXAP	2		1	0.882496	0.949899	1.03743	0.704586	0.605977	0.505092	0.346804									1	1.00894	1.00263	1.15642	0.979061	0.554732	0.487351	0.396396									16.8045	-0.0695514	0.223727	0.925571					15.7355	-0.184013	0.433735	0.953249
O00291	HIP1	16	22	1	1.00773	0.99673	0.983151	0.657737	0.323913	0.134935	0.104439	1	1.03301	1.04573	1.08252	0.71833	0.323435	0.130232	0.070349	1	1.00767	1.00276	1.0423	0.769752	0.308554	0.159407	0.0963715	1	0.963574	1.13432	1.06243	0.701697	0.301295	0.124583	0.0625543	13.2008	-0.144155	0.0394012	0.998992	13.4979	-0.163418	0.0357176	0.990001	13.5779	-0.179737	0.0845315	0.997673	13.3396	-0.166895
O00299	CLIC1	51	51	1	1.02398	1.10564	1.18107	0.985722	1.0235	0.967549	0.185805	1	0.993656	1.02572	1.06778	0.845055	0.674211	0.696476	0.403262	1	1.00789	1.10339	1.17127	0.984574	0.850675	0.776903	0.337117	1	1.00716	1.05498	1.07314	0.886968	0.669285	0.630186	0.410842					19.953	-0.0530656	0	0.918432	19.7897	-0.127393	0	0.884868	19.3557	-0.0604405
O00303	EIF3F	34	30	1	1.00119	1.05347	0.999379	0.680859	0.257409	0.0713397	0.0235216	1	1.01581	1.02778	1.026	0.670667	0.355546	0.147102	0.0248029	1	1.00149	1.07352	0.962164	0.653146	0.303881	0.0881706	0.021405	1	1.03822	1.01278	1.03839	0.703307	0.353821	0.161889	0.0356004	13.0784	-0.177664	0	0.99742	13.4416	-0.143601	0	0.99349	13.071	-0.156417	0	0.994046	13.6158	-0.144075
O00308	WWP2	5	3	1	1.02308	0.966487	0.983673	0.660376	0.264694	0.0815521	0.0452594	1	0.967714	1.04671	1.0369	0.707275	0.393463	0.194227	0.098296	1	1.01736	1.0004	1.00657	0.650353	0.251426	0.100632	0.0428557	1	0.987029	1.10165	1.074	0.734157	0.324576	0.179953	0.103008	13.0159	-0.165848	0	0.998419	13.8568	-0.128914	0.0169279	0.992346	12.947	-0.170919	0.0141258	0.998912	13.5307	-0.166204
O00311	CDC7	3	5	1	0.937106	0.952023	0.883026	0.511619	0.256454	0.179095	0.143558	1	1.08856	0.963847	0.957266	0.522641	0.181322	0.0976059	0.059354	1	0.964019	0.979351	0.849225	0.460595	0.232542	0.140432	0.138024	1	0.93891	0.978279	0.832164	0.450168	0.166072	0.073212	0.0508759	12.0494	-0.138011	0.0930118	0.993709	12.1342	-0.186858	0.0448322	0.993333	11.6186	-0.143554	0.0789843	0.998056	11.4464	-0.153055
O00327	ARNTL	2	3	1	0.999659	1.14463	1.15683	0.751067	0.451936	0.232665	0.0673316	1	1.12661	1.04795	0.926608	0.608004	0.228674	0.172482	0.112852	1	1.07699	1.27191	1.17888	0.753392	0.394382	0.148562	0.0544167	1	1.20973	1.1035	0.904661	0.602029	0.265583	0.0933169	0.0544717	14.4315	-0.128852	0	0.955982	12.5954	-0.160805	0.0869266	0.983687	14.0259	-0.150765	0	0.925866	12.6428	-0.145919
O00329	PIK3CD	2	3	1	0.898874	0.786595	1.10699	0.70707	0.192156	0.0360758	0	1	0.969014	0.954061	1.06286	0.681723	0.288347	0.1246	0.100138	1	0.882858	0.913345	1.05936	0.711954	0.245524	0	0	1	1.03144	1.11973	1.06046	0.743491	0.271452	0.128855	0.101972	12.9897	-0.225095	0	0.950494	13.136	-0.178159	0.0778503	0.991845	13.1222	-0.209491	0	0.978312	13.2932	-0.198823
O00330	PDHX	17	22	1	0.984344	0.966903	0.998257	0.806869	0.698031	0.574976	0.0805599	1	0.992453	1.00945	0.993492	0.762698	0.526968	0.431147	0.156316	1	1.03483	1.01882	1.02545	0.695008	0.643845	0.512706	0.136859	1	1.04952	1.06638	1.05984	0.813561	0.53498	0.446953	0.17512	17.0735	-0.0998588	0	0.907152	15.4865	-0.0874308	0	0.980201	16.1685	-0.0789524	0	0.924384	15.8951	-0.0899677
O00391	QSOX1	4	4	1	1.16251	1.05019	1.02925	0.700448	0.501446	0.374363	0.320584	1	1.03223	1.02904	1.03094	0.652409	0.350241	0.264428	0.298455	1	1.12385	1.16987	1.11505	0.82592	0.408899	0.325845	0.300189	1	0.998168	1.06624	1.00079	0.648671	0.324698	0.276451	0.216116	14.5478	-0.109383	0.300128	0.956344	12.8877	-0.201962	0.282969	0.994849	14.002	-0.182011	0.303139	0.94244	12.9788	-0.171809
O00399	DCTN6	10	7	1	0.991151	1.00529	1.06173	0.863518	0.837234	0.957818	0.714528	1	0.96649	0.999702	0.963509	0.7352	0.544516	0.629927	0.610279	1	1.01899	1.04046	1.05467	0.932254	0.711822	0.745451	0.662956	1	0.990717	0.91542	0.944352	0.766958	0.512077	0.532876	0.468945		-0.0189986	0	0.61581		-0.998299	0.594907	0.975946		-0.120719	0.702256	0.954625	17.4998	-0.105589
O00400	SLC33A1	9	7	1	1.04951	1.1202	1.04517	0.676566	0.326206	0.178185	0.0615381	1	0.999148	1.03078	1.06431	0.618529	0.280029	0.140743	0.0691294	1	1.01201	1.1101	1.04161	0.730986	0.317582	0.139721	0.0799345	1	1.06661	1.0941	1.09085	0.68813	0.2723	0.144915	0.0804997	13.4009	-0.145585	0.0277506	0.981744	12.8772	-0.170855	0.065122	0.99153	13.5075	-0.16441	0.0476446	0.988203	13.1203	-0.185917
O00401	WASL	13	15	1	0.999204	1.01751	1.04084	0.817631	0.81017	0.712667	0.201145	1	0.970064	0.94717	0.97452	0.717139	0.583926	0.565516	0.290164	1	0.984661	1.02485	1.05756	0.876831	0.727178	0.606445	0.290093	1	0.947678	1.01885	0.940526	0.780582	0.53141	0.501894	0.277432	18.9006	-0.140107	0	0.88773	16.9876	-0.0607341	0	0.947319	18.3479	-0.076608	0	0.962337	16.358	-0.0681709
O00408	PDE2A		1									1	0.936256	0.95075	0.91788	0.69192	0.366029	0.14713	0.0016987									1	0.942128	0.921521	0.975724	0.752554	0.402452	0.182251	0.0271596					13.4586	-0.139979	0	0.985614					13.9954	-0.138925
O00410-3	IPO5	100	149	1	1.03927	1.07595	1.11655	0.849647	0.64029	0.381296	0.0511857	1	1.01335	1.05327	0.992517	0.746342	0.521328	0.348495	0.0863148	1	1.01172	1.05458	1.03105	0.728498	0.601829	0.338312	0.0697753	1	1.00611	0.966348	0.984241	0.766612	0.494769	0.311471	0.0964913	16.0759	-0.123541	0	0.959268	14.9475	-0.102323	0	0.980959	15.2607	-0.104279	0	0.964919	14.8076	-0.107459
O00411	POLRMT	36	37	1	0.965201	0.938914	0.758253	0.31396	0.0814331	0.0433327	0.0337656	1	0.976033	0.941359	0.743033	0.30607	0.0715878	0.0324999	0.026311	1	0.996847	0.948532	0.750122	0.316119	0.0971178	0.0485106	0.0311146	1	1.03174	0.944251	0.757231	0.298417	0.0839986	0.0380592	0.0248026	10.5029	-0.18024	0	0.995889	10.4011	-0.183775	0	0.996189	10.4934	-0.174836	0	0.997996	10.4518	-0.184772
O00418	EEF2K	14	15	1	1.01174	1.04025	1.00712	0.616124	0.209932	0.0720614	0.0427246	1	0.993989	1.00772	0.979388	0.642891	0.224832	0.12587	0.0634892	1	0.997224	1.00176	0.994931	0.585912	0.217791	0.0747762	0.0494086	1	1.02127	1.04333	1.02265	0.690636	0.24618	0.0942782	0.0535329	12.6607	-0.191128	0.0225041	0.998029	12.796	-0.181925	0.0523417	0.999547	12.5419	-0.181921	0.0233709	0.999194	13.071	-0.187121
O00422	SAP18	5	5	1	0.979227	0.89616	0.839036	0.516422	0.225749	0.119779	0.0607616	1	0.978752	0.92576	0.81122	0.504715	0.200482	0.0765099	0.0224047	1	0.953675	0.877188	0.816126	0.572458	0.235142	0.115576	0.0627299	1	0.982678	0.86692	0.801153	0.548928	0.198252	0.0664611	0.0397215	11.8964	-0.133346	0	0.989001	11.659	-0.14379	0	0.989839	12.1047	-0.129189	0	0.976786	11.8222	-0.140951
O00423-3	EML1	8	7	1	0.963016	0.984647	0.999269	0.677913	0.37101	0.220593	0.137768	1	0.941662	0.956102	0.987961	0.667266	0.302738	0.166916	0.0848833	1	1.00635	1.00454	1.0075	0.712271	0.36381	0.234285	0.116	1	1.02901	1.09029	1.00285	0.655148	0.300661	0.176744	0.0815247	13.5626	-0.129161	0.0833768	0.996544	13.1999	-0.147951	0.0462155	0.99438	13.7265	-0.132229	0.0717181	0.997228	13.1447	-0.149787
O00425	IGF2BP3	18	16	1	0.98818	1.0503	0.974532	0.576306	0.177266	0.0390058	0.0250151	1	1.05928	1.05855	1.00342	0.636533	0.20254	0.0445426	0.0125882	1	1.04786	1.0266	0.993225	0.739245	0.194166	0.0623329	0.0274547	1	1.08706	1.11433	1.0651	0.617321	0.211398	0.063255	0.0145101	12.4134	-0.19515	0	0.997977	12.7355	-0.197457	0	0.994935	13.0889	-0.225128	0.0192118	0.997957	12.7068	-0.195799
O00429-2	DNM1L	42	50	1	1.01744	0.981416	0.950518	0.557633	0.164206	0.0491939	0.0279729	1	0.99717	0.985998	0.995821	0.610429	0.195753	0.0505228	0.0269427	1	1.01282	1.01552	0.979274	0.53674	0.199031	0.0667373	0.0314854	1	1.00434	1.08165	1.0002	0.599939	0.204883	0.063819	0.0284307	12.2889	-0.190174	0	0.999381	12.6146	-0.192162	0.000478716	0.999448	12.2809	-0.180699	0.00875568	0.998986	12.5934	-0.186729
O00442-2	RTCA	16	16	1	1.0532	1.03447	1.07143	0.808176	0.616597	0.339413	0.0736675	1	0.996712	1.00508	1.10312	0.774274	0.51504	0.379924	0.0661996	1	1.00678	1.0215	1.0342	0.731397	0.578893	0.365488	0.0793602	1	0.967964	1.10651	1.03705	0.781432	0.4606	0.342882	0.0738642	15.7004	-0.115993	0	0.973238	15.1818	-0.107943	0	0.963058	15.2552	-0.100807	0	0.968616	14.8072	-0.111395
O00443	PIK3C2A	25	24	1	1.20761	1.29629	1.1865	0.659526	0.339164	0.193291	0.122931	1	1.11324	1.1834	1.14455	0.64616	0.295269	0.195648	0.121907	1	1.17011	1.25156	1.15003	0.663247	0.305688	0.167771	0.107734	1	1.15581	1.22852	1.15905	0.648542	0.291492	0.193145	0.124715	13.2067	-0.171506	0.134723	0.893132	12.9196	-0.192628	0.147766	0.948849	13.098	-0.180727	0.114677	0.924342	12.8987	-0.198506
O00458	IFRD1	4	3	1	1.03528	1.09003	1.11207	0.845467	0.766533	0.531051	0.197865	1	0.96939	0.908194	1.04091	0.715961	0.335767	0.208713	0.0458961	1	0.931695	1.05314	1.03709	0.806176	0.503385	0.295117	0.158485	1	0.973972	0.963324	0.939648	0.657444	0.313865	0.161509	0.0454657	17.6492	-0.0998811	0	0.940301	13.68	-0.13924	0.00425196	0.983789	15.0574	-0.109656	0.0246772	0.987581	13.1758	-0.1362
O00459	PIK3R2	23	19	1	0.956031	1.01029	0.963275	0.614697	0.224288	0.0670489	0.0460253	1	0.951789	1.00774	0.961629	0.632317	0.246474	0.0860901	0.0445355	1	0.989997	1.00682	1.02485	0.639538	0.228761	0.0709781	0.0446147	1	0.988554	1.03737	1.02417	0.726094	0.267205	0.0910366	0.045222	12.6828	-0.171506	0	0.998216	12.8263	-0.163395	0	0.99805	12.8156	-0.187702	0.0199048	0.998171	13.2978	-0.18269
O00461	GOLIM4	9	10	1	1.02135	0.993534	1.06461	0.834033	0.794842	0.948281	0.728412	1	0.937998	0.997557	1.11601	0.819515	0.638247	0.76611	0.723582	1	1.03214	1.03314	0.996208	0.93594	0.721542	0.706486	0.600598	1	1.0542	1.29612	1.14269	0.939268	0.633075	0.681232	0.675295		-0.324366	0.823845	0.709053		-0.703214	0.709313	0.861806		-0.0656496	0.614344	0.970927		-0.974325
O00462	MANBA	21	22	1	1.01421	1.0264	1.04913	0.750513	0.594527	0.576633	0.40052	1	1.00751	1.03903	0.975088	0.666058	0.397452	0.331884	0.283292	1	1.04919	1.03022	1.0642	0.814464	0.543406	0.446741	0.363445	1	1.00732	1.02703	1.03236	0.717286	0.383399	0.301643	0.248269	18.0094	-0.0782684	0.411233	0.959646	13.4917	-0.134102	0.274982	0.997497	15.7358	-0.106872	0.354192	0.983459	13.5833	-0.155504
O00463	TRAF5	4	2	1	1.02753	1.16294	1.1024	0.754464	0.513902	0.509147	0.13852	1	0.991199	1.04617	0.89884	0.624513	0.405327	0.283227	0.0803656	1	0.959	1.01377	0.945597	0.712193	0.469133	0.335877	0.11742	1	1.12083	0.97229	0.929778	0.720288	0.399267	0.295255	0.10929	15.7693	-0.0865494	0	0.909898	13.465	-0.102394	0	0.98814	14.485	-0.0966789	0	0.988424	14.0661	-0.105092
O00468	AGRN	5	10	1	0.919249	1.02661	0.987402	0.737921	0.69667	0.51354	0.400406	1	1.03784	1.115	0.976427	0.644524	0.456185	0.328842	0.221406	1	1.03618	1.15033	1.14683	0.997882	0.577258	0.522122	0.362412	1	0.985598	0.94439	0.999102	0.728613	0.420141	0.287988	0.165429	18.3328	-0.054795	0	0.95719	14.0165	-0.101154	0.155151	0.977781	16.037	-0.170637	0.427365	0.915796	14.1829	-0.114123
O00469-2	PLOD2	7	10	1	0.972206	1.0347	1.05288	0.747163	0.388694	0.157442	0.0431945	1	0.95599	1.00576	0.963497	0.684268	0.382809	0.153942	0.044271	1	1.01767	1.02853	1.05037	0.66299	0.391901	0.153587	0.0578161	1	1.03163	1.06839	1.01999	0.726701	0.358869	0.164559	0.0567615	13.9343	-0.145547	0	0.992984	13.5588	-0.133796	0	0.995028	13.5907	-0.134662	0	0.989544	13.7388	-0.141842
O00471	EXOC5	14	28	1	0.992069	0.959142	0.849181	0.410237	0.0805451	0.0407908	0.022949	1	1.013	1.02515	0.92231	0.483081	0.152458	0.0907713	0.0754468	1	1.03642	1.00374	0.881096	0.557173	0.096378	0.0441905	0.0266529	1	1.02421	1.04107	0.938737	0.480418	0.156576	0.092613	0.0743378	11.2359	-0.186501	0	0.99634	11.8421	-0.18698	0.0468342	0.998933	12.1309	-0.2047	0	0.992408	11.8657	-0.195678
O00478	BTN3A3		2									1	0.953887	1.0066	0.984232	0.692034	0.398151	0.265326	0.0866379									1	1.03943	1.11145	1.02673	0.83175	0.416649	0.206601	0.0890316					13.916	-0.113158	0	0.992376					14.4178	-0.145539
O00483	NDUFA4	11	9	1	1.15067	1.42921	1.20074	0.859482	0.381243	0.18374	0.118927	1	1.2402	1.21747	1.19147	0.761023	0.321181	0.126542	0.0781584	1	1.15699	1.23171	1.24867	0.831722	0.343346	0.159755	0.0961884	1	1.16832	1.2453	1.13108	0.784672	0.297283	0.138447	0.0873606	14.204	-0.183837	0.107718	0.857379	13.6239	-0.181497	0.0582356	0.916641	13.9466	-0.191083	0.089032	0.914293	13.576	-0.195271
O00487	PSMD14	20	17	1	0.990308	0.97568	0.975995	0.666935	0.222702	0.0347806	0.0149599	1	0.998582	0.981353	0.983744	0.660696	0.279899	0.0602977	0.00978501	1	1.00919	0.985987	0.969723	0.712438	0.271712	0.0606227	0.0199562	1	1.02553	1.00241	0.979388	0.697894	0.313131	0.0793969	0.0164856	12.8905	-0.1943	0	0.99868	13.0294	-0.171659	0	0.997626	13.2279	-0.180138	0	0.998877	13.3075	-0.164695
O00488	ZNF593	4	5	1	0.931718	0.889938	1.05747	0.634531	0.394298	0.307891	0.121942	1	1.03934	1.06997	0.891159	0.612347	0.306619	0.216432	0.100721	1	0.945579	1.03456	1.03191	0.677186	0.340437	0.202194	0.125732	1	1.01948	0.87501	0.892395	0.618811	0.296896	0.17894	0.1036	13.6272	-0.120597	0.109714	0.957399	12.926	-0.114944	0	0.992109	13.368	-0.147805	0.102885	0.992326	12.8578	-0.119513
O00499-2	BIN1	13	14	1	1.00495	1.00827	1.07555	0.902765	0.755565	0.283594	0.0832803	1	1.02114	1.06978	1.07976	0.828214	0.559041	0.304321	0.075438	1	1.0318	1.01849	1.07469	0.974935	0.687574	0.293203	0.101629	1	1.0551	1.10949	1.06239	0.828311	0.541091	0.293291	0.0911007	16.4716	-0.167255	0	0.987449	15.367	-0.121384	0	0.980496	16.2813	-0.152282	0	0.992862	15.2597	-0.119995
O00505	KPNA3	11	8	1	0.928084	1.00576	0.993951	0.720802	0.288234	0.112106	0.0376873	1	1.0189	0.960369	0.999927	0.729364	0.314974	0.106372	0.0390846	1	0.996122	1.04133	0.961548	0.663855	0.320096	0.115677	0.0475555	1	0.940497	1.00039	0.91262	0.714931	0.303961	0.096127	0.0467383	13.3786	-0.164867	0	0.995616	13.4972	-0.162105	0	0.998024	13.2051	-0.145975	0	0.997739	13.3354	-0.156352
O00506	STK25	3	4	1	0.825513	1.06102	0.924711	0.505613	0.200387	0.166396	0.104098	1	0.990901	0.967587	0.879459	0.520341	0.164428	0.0965101	0.10049	1	0.918145	0.965295	0.944186	0.504957	0.187779	0.0610283	0.0517392	1	0.958535	0.969645	0.898489	0.479613	0.174358	0.0725391	0.0446697	11.9938	-0.170964	0.0947658	0.968676	11.9246	-0.159929	0.0335136	0.995598	12.0549	-0.176825	0.0148387	0.99349	11.8223	-0.16353
O00512	BCL9	9	12	1	1.00742	1.03354	1.08412	0.86672	0.867663	0.95376	0.7313	1	1.02188	1.02964	1.04075	0.807103	0.615391	0.63362	0.55767	1	1.00492	1.06758	1.07526	1.21125	0.740048	0.707715	0.587715	1	1.00695	1.04782	1.06979	0.882018	0.602444	0.562945	0.493026		-0.0199418	0	0.624862		-0.132576	0.594643	0.980797		-0.27622	0.647639	0.813034		-0.111209
O00515	LAD1	25	20	1	0.967465	1.00795	0.963255	0.662863	0.331004	0.140689	0.0740331	1	1.03007	0.981287	0.929687	0.62167	0.293538	0.123775	0.0543923	1	1.01085	0.982011	0.956104	0.761114	0.309294	0.12894	0.0775541	1	0.98583	0.944499	0.909189	0.647948	0.281435	0.119127	0.0624797	13.2777	-0.136245	0	0.998719	12.8837	-0.140235	0	0.998348	13.5742	-0.166724	0.0371942	0.998711	12.9474	-0.141954
O00519	FAAH	9	6	1	1.01917	1.00846	0.954911	0.573257	0.240645	0.102339	0.0428311	1	1.01075	1.00894	0.885325	0.563017	0.206459	0.0915446	0.0482529	1	1.00662	0.995389	0.950855	0.518801	0.231681	0.10414	0.0408221	1	1.00397	0.956849	0.889975	0.545917	0.224868	0.10085	0.0395971	12.5355	-0.155267	0	0.999452	12.2618	-0.15197	0	0.997936	12.2402	-0.156968	0.00798724	0.998974	12.221	-0.147637
O00522	KRIT1	3	4	1	1.14636	1.13242	1.108	0.763745	0.269535	0.126008	0.0765112	1	0.998034	0.961241	0.932143	0.593677	0.206953	0.0902556	0.0624226	1	1.09838	1.00842	1.06966	0.618024	0.189859	0.10837	0.0650194	1	0.978279	1.05439	1.06936	0.599182	0.203922	0.0722688	0.0386244	13.3924	-0.202337	0.0722768	0.966461	12.5075	-0.166479	0.01532	0.998078	12.5573	-0.232112	0.077751	0.988662	12.5712	-0.208118
O00534	VWA5A	2	2	1	1.02713	1.08937	1.06905	0.920013	0.906254	0.458006	0.205791	1	0.985458	0.926672	1.02809	0.707382	0.516837	0.422197	0.166033	1	1.00497	1.09575	1.19324	1.23308	0.638013	0.514969	0.287505	1	0.904217	1.09618	0.971343	0.821614	0.539373	0.354413	0.156019	17.7335	-0.169329	0.123536	0.97339	15.2297	-0.0853721	0	0.964702	15.8468	-0.240078	0.392634	0.850108	15.4773	-0.099263
O00541	PES1	19	21	1	0.986906	0.951372	0.944836	0.685866	0.40157	0.0912294	0.0217423	1	1.00568	0.968695	0.900169	0.644891	0.398748	0.202272	0.0262765	1	1.02085	0.973063	0.910365	0.759937	0.438652	0.149697	0.0240969	1	1.02475	0.922104	0.920622	0.668294	0.420032	0.209424	0.0330686	13.5222	-0.143628	0	0.987778	13.3595	-0.118788	0	0.988079	14.0809	-0.139774	0	0.988335	13.6236	-0.118786
O00559	EBAG9	6	4	1	1.05547	1.06196	1.03131	0.80002	0.664064	0.678784	0.442628	1	0.989337	1.16809	0.953856	0.633834	0.540565	0.53638	0.387515	1	1.03193	1.04105	1.03545	0.962139	0.596131	0.511214	0.37419	1	1.03113	0.999462	1.04686	0.856984	0.522112	0.394855	0.301647	20.6292	-0.0481566	0.112919	0.925169	15.6974	-0.102393	0.44391	0.93024	16.5914	-0.126734	0.404223	0.980772	15.3725	-0.119273
O00560-2	SDCBP	1	1	1	1.00382	0.901743	0.998657	0.8508	0.592617	0.681496	0.911116	1	0.854383	1.0735	0.871676	0.839668	0.582559	0.398676	0.267179	1	1.01699	1.19597	1.06238	0.735228	0.701254	0.780519	0.676178	1	0.991179	1.19109	1.04397	0.854691	0.509921	0.332135	0.340327		-0.745982	0.728409	0.61827	16.1822	-0.0774495	0	0.937582		-0.676504	0.719317	0.819341	14.9788	-0.137429
O00560	SDCBP	12	11	1	0.986467	0.984059	1.03907	0.785131	0.70365	0.726619	0.430911	1	1.01863	1.02381	1.05615	0.736981	0.492044	0.517236	0.434838	1	0.997472	1.10218	1.01104	0.784885	0.612485	0.562196	0.438587	1	1.03258	1.13024	1.02543	0.794642	0.478823	0.476161	0.444871		-0.0452297	0	0.89226	14.3092	-0.210257	0.477123	0.985359	18.8658	-0.0722126	0.408253	0.963731	14.2786	-0.203295
O00562	PITPNM1	12	7	1	0.981594	1.02138	1.01817	0.716924	0.335521	0.124648	0.0424319	1	0.989515	0.983021	1.01187	0.762543	0.367868	0.178377	0.0670933	1	0.960004	0.986369	0.987625	0.642323	0.351618	0.12174	0.0433121	1	1.01904	1.10901	1.11248	0.804064	0.380037	0.173985	0.0626966	13.5477	-0.153344	0	0.997647	13.9422	-0.141271	0.00118785	0.998457	13.2352	-0.140663	0	0.994687	14.1295	-0.156975
O00566	MPHOSPH10	5	11	1	0.964788	0.970833	0.837571	0.516525	0.403938	0.1994	0.0403514	1	1.02937	0.954419	0.74953	0.286493	0.106649	0.0688593	0.0283032	1	1.03474	1.00845	0.900881	0.616685	0.407995	0.259306	0.0530972	1	1.04548	0.951297	0.767224	0.277736	0.0974225	0.0596451	0.0387562	12.4517	-0.108309	0	0.980648	10.4116	-0.178095	0.00458778	0.998111	13.3555	-0.107118	0	0.987255	10.4259	-0.191274
O00567	NOP56	16	14	1	0.968509	0.913925	0.689915	0.288683	0.135499	0.110354	0.0735702	1	1.02031	0.959038	0.682861	0.23824	0.0810994	0.0475022	0.0329143	1	0.973217	0.940928	0.681512	0.308236	0.122609	0.0871767	0.0625678	1	1.05709	0.929092	0.665978	0.22121	0.0812471	0.0511806	0.0356898	10.144	-0.157195	0.0268249	0.994606	9.97579	-0.187918	0.00226433	0.998944	10.1854	-0.152896	0	0.997698	9.84966	-0.189207
O00571	DDX3X	34	33	1	1.00604	0.921426	0.809561	0.3451	0.0735028	0.0480758	0.0393612	1	0.980412	0.888696	0.791216	0.358062	0.0640935	0.0305242	0.0265224	1	0.970001	0.914076	0.781428	0.318995	0.0841352	0.0481066	0.0398747	1	0.972636	0.875	0.757521	0.317926	0.0758964	0.0382067	0.0283017	10.8115	-0.184566	0	0.994313	10.7625	-0.183428	0	0.987916	10.6164	-0.181087	0	0.993569	10.491	-0.180098
O00584	RNASET2	7	14	1	0.937208	0.945431	0.979997	0.913157	0.892427	0.930176	0.775506	1	0.979458	0.988654	1.06778	0.803044	0.612608	0.646878	0.61202	1	1.0052	1.07878	1.07707	0.996892	0.80797	0.79576	0.724886	1	1.0217	1.13302	1.09064	0.870982	0.605828	0.585957	0.572947		-0.0135803	0	0.553447		-0.880212	0.623835	0.977269		-0.0808981	0.756098	0.891222		-0.146446
O00592	PODXL	9	11	1	0.990194	0.997515	1.03217	0.892885	0.916768	1.08258	0.888975	1	1.03668	1.03659	1.06547	0.890281	0.74954	0.772064	0.860885	1	1.01411	1.02292	1.03479	0.971084	0.830804	0.84555	0.770706	1	1.04426	1.09867	1.1177	0.993192	0.716785	0.754213	0.723631		-0.0308717	0.945804	0.197967		-0.349722	0.794163	0.873338		-0.0520943	0.800818	0.939839		-0.747385
O00623	PEX12		2									1	1.09476	1.13859	0.971011	0.552076	0.147205	0.05706	0.0701952									1	0.924313	0.90945	0.820071	0.443155	0.122166	0.0515948	0.0285229					12.2288	-0.227482	0.0483038	0.982157					11.2909	-0.164303
O00625	PIR	25	27	1	0.960463	0.987247	1.01221	0.824157	0.843946	0.898559	0.724903	1	0.988392	1.01911	1.04513	0.777403	0.60733	0.62775	0.614954	1	1.01441	1.02736	1.02087	0.783923	0.719521	0.665816	0.639134	1	0.956679	1.0593	1.04316	0.818238	0.55453	0.565382	0.548617		-0.293046	0.822469	0.758564		-0.965018	0.616678	0.990015		-0.0870404	0.661998	0.980698		-1.02672
O00628	PEX7	3		1	0.952303	1.01693	1.01344	0.827184	0.824288	0.65618	0.640396									1	0.93553	1.02401	1.1048	0.900744	0.668268	0.591929	0.411982										-0.0379723	0.480385	0.93372					18.8965	-0.0712731	0.313557	0.944584
O00629	KPNA4	24	19	1	1.02324	1.07206	1.0562	0.809162	0.573458	0.198004	0.0645235	1	0.96436	0.934493	0.9384	0.72307	0.457274	0.26689	0.0459538	1	1.00694	1.07698	1.08016	0.771153	0.558392	0.255693	0.0732589	1	1.02495	1.03958	1.00684	0.788027	0.464675	0.287088	0.0597163	15.1053	-0.136886	0	0.982135	14.212	-0.113965	0	0.981935	15.0264	-0.120526	0	0.975992	14.6664	-0.119948
O00635	TRIM38	4	1	1	0.961575	0.917923	0.922549	0.520137	0.127502	0.0268046	0.0192317	1	0.925346	0.884435	0.982394	0.550185	0.150752	0.0203298	0.0127719	1	1.01738	1.04779	1.04368	0.603791	0.151435	0.0410152	0.0212936	1	1.06559	1.20312	0.998077	0.626755	0.160019	0.0417449	0.0712199	12.0344	-0.201558	0	0.992719	12.2604	-0.212888	0	0.985732	12.4825	-0.233875	0.0173843	0.996236	12.5422	-0.239794
O00716	E2F3	3	2	1	0.92063	0.959201	0.908019	0.661786	0.303252	0.128426	0.0449779	1	1.00718	1.05867	0.855941	0.599825	0.355719	0.256474	0.122027	1	1.01572	1.11029	1.01092	0.783253	0.239402	0.117641	0.0629617	1	0.944073	0.886239	0.847691	0.650657	0.354118	0.232319	0.113811	13.0836	-0.140903	0	0.989844	13.01	-0.101228	0	0.993067	13.3494	-0.218484	0.0649541	0.990741	13.1538	-0.1034
O00743-3	PPP6C	15	16	1	0.974215	0.968089	0.914933	0.705063	0.627868	0.823014	0.676339	1	0.939495	0.941608	0.940178	0.613294	0.41421	0.510025	0.580664	1	0.987135	0.95312	0.937718	0.652909	0.509296	0.587539	0.57484	1	0.979135	1.04207	0.987496	0.71926	0.393343	0.488662	0.500033		-0.697539	0.708071	0.856589		-0.154583	0.502904	0.939364		-0.12704	0.555244	0.976992	12.2343	-1.4456
O00748	CES2	3	1	1	1.00333	1.01721	1.02715	0.856383	0.892076	0.873033	0.199975	1	0.950662	0.908845	0.951222	0.660966	0.578591	0.623414	0.217058	1	1.07265	1.11084	1.15818	1.09651	0.860834	0.74425	0.271204	1	0.957269	0.986432	0.992736	0.933162	0.577546	0.573001	0.245442	19.6242	-0.27029	0	0.937685	16.5932	-0.0604719	0	0.862922	19.381	-0.15165	0	0.893293	17.3128	-0.0791391
O00750	PIK3C2B	10	7	1	1.03683	1.06393	0.98141	0.521945	0.201134	0.10148	0.0460626	1	1.05334	1.04533	0.981	0.522172	0.215785	0.141051	0.0956168	1	0.992791	1.02111	0.926254	0.486719	0.186254	0.0843267	0.0449635	1	1.02188	1.05355	1.00081	0.528669	0.169094	0.104432	0.083123	12.1962	-0.184964	0.0424939	0.995172	12.1697	-0.192526	0.0992547	0.995599	11.9378	-0.169204	0.014348	0.999569	12.1465	-0.23436
O00754	MAN2B1	16	18	1	0.971016	1.01155	1.03233	0.818726	0.697795	0.80414	0.701123	1	1.00586	0.997102	0.947352	0.655251	0.488302	0.513687	0.504797	1	1.09128	1.10349	1.13463	0.977392	0.720758	0.646229	0.586866	1	0.983028	1.00575	1.00498	0.732254	0.495465	0.472158	0.408468		-0.611258	0.734353	0.932342	17.8819	-0.125558	0.491061	0.996142		-0.101153	0.602894	0.888424	14.8937	-0.128277
O00762	UBE2C	14	12	1	1.12287	1.3353	1.42781	1.17177	1.07943	0.982025	0.618194	1	1.27962	1.39996	1.46654	1.07345	0.858336	0.808684	0.55926	1	1.15741	1.30619	1.36776	1.32527	0.952729	0.774549	0.5376	1	1.23106	1.43438	1.4303	1.15822	0.798233	0.702429	0.461366						-0.0697494	0	0.317009		-0.0986898	0.428955	0.403605	20.4824	-0.0789135
O00763	ACACB	19	17	1	1.00866	1.00534	0.902969	0.50824	0.15488	0.0771658	0.0705402	1	0.995535	0.942007	0.901088	0.513122	0.138664	0.0429359	0.02547	1	1.01503	0.973286	0.961133	0.552357	0.151165	0.0728376	0.0530649	1	1.01616	0.988075	0.908489	0.510115	0.152175	0.0485505	0.0261236	11.9326	-0.172782	0.0209283	0.998502	11.9537	-0.183836	0	0.995837	12.2384	-0.210194	0.0376332	0.999156	11.9695	-0.179998
O00764	PDXK	14	12	1	0.952929	0.990005	1.01981	0.778438	0.694457	0.889945	0.712533	1	1.00006	1.07195	1.02524	0.78771	0.613221	0.683997	0.710944	1	0.93281	0.958931	0.925884	0.671127	0.620847	0.534294	0.517013	1	0.924554	1.02526	0.981904	0.828431	0.619619	0.565172	0.565794		-0.604282	0.765645	0.790366		-0.676662	0.669388	0.952724		-0.0779175	0.503538	0.971043		-0.0970572
O00767	SCD	15	13	1	0.988152	0.948466	0.892618	0.473519	0.122833	0.0270672	0.0202252	1	0.983026	0.967461	0.907085	0.513945	0.148737	0.0328612	0.0211706	1	0.995988	0.950162	0.893555	0.493229	0.150824	0.04271	0.0181857	1	0.985199	0.990289	0.878137	0.500435	0.159525	0.0513358	0.0275715	11.7228	-0.188756	0	0.996309	11.9845	-0.185482	0	0.99751	11.8442	-0.177858	0	0.99683	11.8421	-0.168908
O14492	SH2B2	2		1	1.03434	0.994278	0.952186	0.593901	0.277261	0.151262	0.0636799									1	1.05896	1.06244	0.934525	0.540633	0.323942	0.127656	0.0676568									12.7638	-0.139101	0.00695612	0.998418					12.5857	-0.130859	0	0.990839
O14494	PPAP2A		1									1	1.00648	1.14013	1.05425	0.761298	0.71366	0.606806	0.510376									1	0.956458	0.991179	0.988241	0.755078	0.576458	0.611846	0.461043						-0.0590159	0.470561	0.906912						-0.0843669
O14495	PPAP2B	1		1	0.986966	0.991199	1.08033	0.884054	0.711159	0.708887	0.256292									1	0.841859	1.02913	0.982426	0.680256	0.569525	0.560021	0.310602									18.7029	-0.078154	0	0.895279					16.8173	-0.0613107	0.0657889	0.89346
O14497	ARID1A	38	35	1	0.999138	0.972959	0.965871	0.669472	0.354304	0.149917	0.0562416	1	0.981265	1.01021	0.950503	0.623415	0.305632	0.124364	0.0395679	1	1.01644	1.01665	0.990899	0.715064	0.358966	0.155081	0.0645691	1	0.990955	0.99145	0.948143	0.628878	0.309362	0.128948	0.0453395	13.3917	-0.134833	0	0.997996	12.957	-0.142696	0	0.998432	13.6576	-0.139192	0	0.998934	12.9976	-0.140736
O14508	SOCS2	1		1	1.05569	1.19961	1.23461	0.734643	0.342012	0.335163	0.180292									1	1.10666	1.172	1.13688	0.706445	0.348601	0.194918	0.108395									13.3525	-0.19566	0.247977	0.912038					13.5396	-0.158529	0.099619	0.952705
O14519	CDK2AP1	1	2	1	0.93735	1.10652	1.05252	0.734414	0.590417	0.9634	0.740411	1	1.06485	1.12136	1.16549	0.630584	0.451147	0.503008	0.548854	1	1.03098	0.968268	0.747513	0.692772	0.464892	0.513232	0.369093	1	0.898121	0.894082	0.770166	0.607957	0.349587	0.448893	0.384748		-0.13189	0.763746	0.603976		-1.1961	0.501003	0.921111	15.9466	-0.0563677	0	0.96813	13.7837	-0.0714264
O14521	SDHD	1	2	1	0.763848	0.833089	1.0749	0.61062	0.393359	0.262426	0.052308	1	1.12434	1.32535	1.02446	0.685349	0.455771	0.308506	0.0702274	1	1.01243	1.7923	1.00874	0.901028	0.546223	0.295682	0.133982	1	0.973776	0.973372	1.06751	0.587606	0.463447	0.272737	0.116968	13.5954	-0.11832	0	0.876729	14.2724	-0.10836	0	0.89744	15.5188	-0.124054	0.0197777	0.664641	13.8645	-0.105104
O14523-2	C2CD2L	2	3	1	1.02894	1.24365	1.2339	0.824432	0.405437	0.228847	0.0549319	1	0.909998	0.923173	1.01	0.564307	0.302684	0.176075	0.125612	1	0.930906	1.00932	0.923924	0.549689	0.270644	0.111484	0.0255677	1	1.12495	1.10047	1.03782	0.661193	0.296634	0.158448	0.147762	14.4158	-0.151248	0.0302973	0.918021	12.6002	-0.162067	0.121972	0.981578	12.4325	-0.144964	0	0.994179	13.0094	-0.178372
O14524	TMEM194A	4	3	1	0.961882	0.969057	0.946962	0.778113	0.594049	0.503014	0.342697	1	0.942166	0.93769	0.964034	0.57144	0.232718	0.070566	0.00925435	1	0.95252	1.01896	0.965886	0.87634	0.500291	0.397857	0.282295	1	1.01147	1.05283	0.995061	0.630922	0.25157	0.0798977	0.0219078	17.1738	-0.0610693	0	0.990005	12.4949	-0.169318	0	0.993127	15.2441	-0.124972	0.277214	0.989964	12.8513	-0.170305
O14526	FCHO1	3	3	1	1.09712	0.947664	1.0409	0.816734	0.65904	0.354113	0.208804	1	0.898322	0.956737	1.02928	0.775271	0.450896	0.424754	0.157771	1	1.05898	1.15021	1.19919	1.61973	0.619881	0.368178	0.236594	1	1.10724	1.26709	1.0891	0.879075	0.50704	0.366397	0.281854	16.2334	-0.0957247	0	0.972673	15.1347	-0.0932534	0.0211558	0.954124	15.3169	-0.428069	0.301434	0.695727	15.1434	-0.135934
O14530	TXNDC9	8	12	1	1.00142	0.941199	0.996854	0.79688	0.596454	0.538866	0.3068	1	1.03106	1.00132	0.996285	0.766177	0.540953	0.461924	0.346924	1	1.00283	1.02247	1.06073	0.85956	0.583988	0.4742	0.31538	1	1.00725	1.05774	1.00553	0.818498	0.512396	0.391545	0.322649	17.2469	-0.0650957	0	0.972062	15.9415	-0.0859337	0.294513	0.993053	16.5463	-0.089684	0.24175	0.984319	15.2299	-0.11248
O14531	DPYSL4	4	7	1	1.06474	1.11113	1.13596	0.866272	0.697764	0.529469	0.389765	1	0.934216	1.02622	0.980639	0.703835	0.399359	0.277881	0.172515	1	0.948119	0.974272	0.971924	0.736924	0.483268	0.353975	0.276852	1	1.03439	1.06134	1.00058	0.734259	0.410923	0.255253	0.119452	18.2351	-0.073955	0.234317	0.929259	13.8993	-0.117062	0.111522	0.992764	14.756	-0.0978618	0.196483	0.99445	14.1616	-0.116326
O14544	SOCS6	10	13	1	1.01667	0.986468	0.963554	0.606171	0.252283	0.132238	0.0921602	1	1.06156	1.01791	0.982353	0.64708	0.253845	0.0982548	0.0697185	1	0.992575	0.996507	1.01022	0.658958	0.251959	0.118184	0.0763937	1	0.982575	1.00569	0.984443	0.600549	0.244433	0.101274	0.0572849	12.6876	-0.162114	0.0594538	0.999615	12.9029	-0.170084	0.0315436	0.996751	12.938	-0.180162	0.0579151	0.999202	12.6797	-0.166365
O14545	TRAFD1	4	6	1	1.04887	1.21735	1.18053	0.765214	0.665865	0.633165	0.436942	1	0.998072	1.09954	1.07816	0.672009	0.41417	0.343863	0.298681	1	0.904457	1.14068	1.07702	0.798919	0.511887	0.386052	0.333625	1	0.978286	1.07379	1.00119	0.672877	0.379604	0.268287	0.222026		-0.0712885	0.458669	0.809336	13.3176	-0.169628	0.321434	0.9767	15.0383	-0.119493	0.31793	0.947953	13.44	-0.139715
O14548	COX7A2L	5	7	1	1.13479	1.2227	1.18291	0.923962	0.519611	0.190457	0.0994805	1	1.07933	1.00878	1.10201	0.691624	0.333611	0.160746	0.0664815	1	1.05095	1.0571	1.23136	0.799133	0.388831	0.178798	0.0978676	1	1.03416	1.10349	0.920518	0.634357	0.300281	0.119146	0.066836	15.1083	-0.171451	0.0551695	0.929002	13.4707	-0.154596	0.0397615	0.982548	14.1094	-0.163091	0.0716316	0.953559	12.9539	-0.138723
O14561	NDUFAB1	3	6	1	0.93165	1.14638	1.54611	0.904016	1.09657	0.890806	0.88877	1	1.13436	1.40295	1.21628	0.847049	0.635561	0.5392	0.542184	1	0.99398	1.29751	1.27654	1.07642	0.731825	0.643202	0.739782	1	1.14379	1.18584	1.25722	0.817861	0.689993	0.511859	0.48405		-0.0250771	0.682634	-0.00556076		-0.107922	0.537489	0.692853		-0.740214	0.691492	0.592325	19.6169	-0.0827977
O14562	UBFD1	21	23	1	0.958138	0.997204	1.0432	0.831842	0.824661	0.755181	0.382158	1	0.984598	1.02384	1.03954	0.812454	0.567939	0.534524	0.370898	1	0.966281	1.00472	1.02125	0.899637	0.694873	0.594518	0.394813	1	0.976193	1.03622	1.01419	0.842453	0.541985	0.480974	0.351527	20.2382	-0.0690633	0	0.877676	16.9311	-0.0842517	0.353397	0.976811	19.0168	-0.0618213	0	0.984575	16.0851	-0.100045
O14578-3	CIT	1		1	1.17379	1.09717	1.09112	0.846565	0.407803	0.11132	0.124232									1	1.06988	0.966436	1.20934	1.09792	0.279749	0.121098	0.0996144									14.2548	-0.177825	0.0660682	0.963009					14.7331	-1.02495	0.110354	0.962253
O14578-4	CIT	20	18	1	1.01463	1.03663	1.03142	0.64261	0.198481	0.0989093	0.0798401	1	1.05112	1.0878	1.01499	0.629347	0.183342	0.0789078	0.0488987	1	0.993061	1.00922	0.953969	0.642065	0.179294	0.0840915	0.0519543	1	1.03758	1.06048	0.965643	0.579934	0.169607	0.0656505	0.036212	12.6754	-0.222513	0.0754756	0.997573	12.6277	-0.215945	0.0432569	0.992601	12.6686	-0.206213	0.0375266	0.99908	12.4051	-0.196554
O14579	COPE	14	23	1	0.884773	1.00857	0.965759	0.822344	0.302714	0.0620233	0.024376	1	0.96529	0.993157	0.942475	0.654253	0.387401	0.0913234	0.0199717	1	1.00124	1.03789	1.0408	0.943775	0.371304	0.0901929	0.0330316	1	0.969202	1.01872	0.973182	0.688806	0.410249	0.0905423	0.021384	13.7632	-0.198756	0	0.988716	13.308	-0.141386	0	0.989058	14.4191	-0.240469	0.0273764	0.997682	13.594	-0.145043
O14593	RFXANK	2	2	1	0.997624	1.06862	1.01392	0.787123	0.521329	0.193087	0.0531483	1	0.949865	1.00796	0.94273	0.650059	0.311072	0.105273	0.013668	1	0.909497	0.984147	1.03427	0.790328	0.399628	0.213571	0.0786105	1	0.99159	0.980741	1.00965	0.646919	0.27609	0.104069	0.020451	14.7219	-0.133525	0	0.987896	13.068	-0.150639	0	0.994893	14.2439	-0.13656	0.0120148	0.988462	13.0199	-0.162581
O14602	EIF1AY	1	2	1	0.912145	0.840733	0.855263	0.686389	0.502328	0.281667	0.127445	1	0.965588	0.927919	1.03009	0.714549	0.478721	0.463407	0.229495	1	0.913181	1.00281	0.943289	0.91466	0.480739	0.348796	0.126987	1	0.970052	1.10005	0.970021	0.716231	0.414234	0.35587	0.207984	14.1135	-0.0907367	0	0.935331	15.1016	-0.0891309	0.173064	0.957028	15.327	-0.120805	0.0503415	0.974396	14.1842	-0.107814
O14613	CDC42EP2	1	1	1	0.969246	1.25911	1.01235	0.524672	0.245265	0.272949	0.218356	1	0.739451	0.920645	1.00449	0.457909	0.212677	0.114624	0.0815524	1	1.27665	1.15414	1.15834	0.67443	0.417847	0.197693	0.185778	1	1.10155	1.17771	1.12927	0.560655	0.292483	0.122582	0.0978747	12.0162	-1.68486	0.245523	0.943004	11.8743	-0.218951	0.1006	0.929425	13.6292	-0.145828	0.154317	0.902025	12.5392	-0.195609
O14617-5	AP3D1	45	44	1	0.985547	0.946572	0.707327	0.311858	0.0639106	0.0331438	0.0244944	1	1.03118	0.969727	0.72794	0.307209	0.079748	0.0351593	0.0237205	1	0.999888	0.966232	0.672902	0.246197	0.0717375	0.0321591	0.026048	1	0.981579	0.915268	0.743002	0.3087	0.0826332	0.0382236	0.0228134	10.2539	-0.178681	0	0.995652	10.3537	-0.180042	0	0.997708	9.94522	-0.188929	0	0.999242	10.4138	-0.179609
O14618	CCS	8	5	1	0.982935	0.996588	1.01094	0.888675	0.914231	0.935766	0.721743	1	1.05447	1.1302	1.14127	0.810591	0.644746	0.644889	0.532403	1	0.969479	1.04178	1.08395	0.969997	0.73477	0.730728	0.653263	1	1.00272	1.05882	1.08848	0.878434	0.535232	0.512382	0.443909		-0.0283841	0	0.729032		-0.111334	0.591023	0.88478		-0.0959402	0.686127	0.934615	16.2	-0.148674
O14628	ZNF195	3	2	1	1.08952	1.01418	0.936507	0.410614	0.14294	0.0460694	0.0152392	1	1.04693	0.988637	0.940258	0.525085	0.177401	0.172091	0.118551	1	1.03288	0.936992	0.73345	0.397084	0.119663	0.0363333	0.0153603	1	1.00144	1.05454	0.883239	0.493614	0.225763	0.122384	0.042718	11.5646	-0.19869	0.0072798	0.994272	12.0774	-0.196021	0.115943	0.996157	10.6995	-0.158725	0	0.99162	11.967	-0.143167
O14639	ABLIM1	18	12	1	0.978104	0.979395	0.985734	0.840584	0.723792	0.715963	0.557562	1	1.01986	0.989317	0.946326	0.74144	0.491791	0.455269	0.386614	1	0.995203	1.00709	0.994667	0.898577	0.621626	0.546525	0.473584	1	1.00369	0.974164	0.934236	0.706578	0.467795	0.38421	0.33408		-0.0355087	0	0.963712	15.3559	-0.0954735	0.359837	0.995797	19.6379	-0.0967355	0.472904	0.9968	14.6071	-0.094877
O14640-2	DVL1	1	1	1	0.966696	0.940633	0.839479	0.400583	0.130097	0.0652241	0.051876	1	0.921768	0.911175	0.700082	0.349929	0.112368	0.0816782	0.00374059	1	1.10134	1.01176	0.820441	0.484539	0.145882	0.0675833	0.0399135	1	1.14369	0.975574	0.780295	0.349509	0.1393	0.0290077	0.0562607	11.2079	-0.166326	0	0.996086	10.3675	-0.156368	0	0.986812	11.5302	-0.155259	0	0.988742	10.7809	-0.166242
O14640	DVL1	9	7	1	0.988689	1.01874	0.918339	0.530585	0.220461	0.154337	0.0892499	1	1.11315	0.985196	0.926098	0.573121	0.195279	0.0919983	0.047065	1	0.992512	0.993297	0.879128	0.493873	0.238012	0.135986	0.0899965	1	0.963586	1.01147	0.910009	0.476881	0.193012	0.0814468	0.0588112	12.1788	-0.154365	0.0605114	0.998972	12.386	-0.163141	0.000694386	0.990149	11.9569	-0.139039	0.0292002	0.999932	11.8587	-0.163687
O14641	DVL2	12	21	1	0.970179	0.957553	0.893904	0.533748	0.173377	0.0788281	0.0469745	1	0.986678	0.983089	0.937594	0.526058	0.199718	0.0795289	0.0585022	1	0.980471	1.00519	0.901349	0.541858	0.201882	0.0819596	0.0503381	1	1.01016	0.992314	0.928078	0.535526	0.206305	0.0908225	0.0653246	12.0739	-0.161857	0	0.996471	12.1659	-0.168457	0.0176912	0.999553	12.1834	-0.156316	0	0.998971	12.2084	-0.162098
O14646	CHD1	4	5	1	0.944988	0.89636	0.715552	0.220235	0.102936	0.0777922	0.0631106	1	0.928487	0.91223	0.831922	0.333113	0.145917	0.115431	0.0790366	1	0.858473	0.947079	0.640487	0.218668	0.082487	0.0795153	0.112296	1	1.01345	1.06807	0.764585	0.316192	0.165048	0.103466	0.0773213	10.0054	-0.212376	0.0521253	0.989634	10.8425	-0.188555	0.0706699	0.989141	9.6683	-0.214099	0.0707438	0.979461	10.5766	-0.176047
O14647	CHD2		3									1	1.0494	1.04145	0.799344	0.510509	0.25782	0.160003	0.0740364									1	1.03887	1.09598	0.821599	0.438756	0.260031	0.150722	0.120198					11.856	-0.121064	0	0.993911					11.5141	-0.137292
O14653-2	GOSR2	4	5	1	0.995173	1.17758	1.1367	0.851526	0.633382	0.692377	0.351376	1	0.929245	1.00822	0.896276	0.751437	0.438365	0.395151	0.317072	1	0.91383	0.940315	0.829635	0.687641	0.500464	0.399307	0.269168	1	0.941446	0.906072	0.915242	0.712381	0.422112	0.38839	0.272269	19.0505	-0.0600704	0	0.838089	14.7745	-0.0893024	0.223425	0.979919	14.8548	-0.0681084	0	0.975664	14.4355	-0.0894574
O14656	TOR1A	10	18	1	0.998314	1.02908	0.953345	0.555087	0.194829	0.0659137	0.0316802	1	0.973543	1.01793	0.982945	0.61423	0.252735	0.11758	0.088188	1	0.991882	1.02788	0.966606	0.542479	0.206432	0.0688567	0.0412625	1	0.96495	1.00093	0.971526	0.570853	0.2349	0.10256	0.0727335	12.3333	-0.175034	0	0.999347	12.7314	-0.169588	0.0585756	0.998892	12.3068	-0.174413	0.00869049	0.998971	12.4855	-0.168832
O14657	TOR1B	7	8	1	1.0221	1.00478	1.01982	0.63591	0.278223	0.107349	0.0874207	1	0.982108	0.99908	1.03368	0.668631	0.291412	0.114844	0.0469237	1	1.02318	1.04771	1.03745	0.561314	0.285946	0.131066	0.078695	1	1.00765	1.12874	1.04826	0.683928	0.272406	0.118704	0.0614396	12.9214	-0.168861	0.0533604	0.997232	13.1853	-0.160006	0.00805969	0.996695	12.6009	-0.167482	0.0719772	0.990889	13.1414	-0.17603
O14662-2	STX16	5	9	1	1.00723	0.932409	1.02694	0.825179	0.551937	0.370063	0.206403	1	1.06108	0.993363	1.01685	0.732997	0.421816	0.269189	0.20237	1	0.980108	1.01268	1.01145	0.805038	0.471861	0.278863	0.19421	1	1.01365	0.999805	0.984716	0.703934	0.429035	0.240531	0.15139	15.7518	-0.0938039	0.0110001	0.989199	14.0568	-0.126441	0.158245	0.993906	14.703	-0.121064	0.122958	0.99854	14.075	-0.110393
O14668	PRRG1	1	1	1	1.07193	1.21126	1.27522	0.778846	0.663723	0.648204	0.427927	1	1.07536	0.837761	1.08586	0.85777	0.503632	0.311047	0.323018	1	1.15806	1.09551	1.17302	0.311831	0.53652	0.429107	0.338146	1	1.40006	1.2361	1.12603	0.921129	0.609794	0.385	0.192435		-0.0740319	0.46415	0.754412	14.891	-0.142803	0.287186	0.943842	11.0899	-0.373435	0.400783	0.901121	16.2642	-0.110935
O14672	ADAM10	29	30	1	1.00783	1.00839	0.990706	0.75737	0.664124	0.704398	0.511252	1	0.977551	1.03773	1.04233	0.724993	0.486062	0.483123	0.434962	1	0.98115	1.00282	0.977321	0.722483	0.581145	0.525247	0.430173	1	1.01356	1.05407	1.00631	0.737911	0.464932	0.42058	0.3755		-0.0575257	0.538079	0.936142	14.1646	-0.188151	0.46051	0.99025	17.6112	-0.0781897	0.411746	0.991067	14.3058	-0.138065
O14678	ABCD4	2	2	1	0.921848	1.02591	1.03191	0.617062	0.25941	0.124746	0.0818899	1	1.08938	1.08132	1.14208	0.576724	0.258433	0.0288143	0.0523527	1	1.06809	0.921924	0.985777	0.646172	0.243744	0.138556	0.0678101	1	1.02514	1.05304	0.889315	0.468049	0.143076	0.0569906	0	12.7718	-0.178217	0.0702506	0.991379	12.6241	-0.196157	0.0283677	0.969865	12.873	-0.172804	0.0540213	0.99085	11.707	-0.178738
O14681	EI24	3	4	1	0.941904	1.02528	0.943434	0.609354	0.197887	0.0568563	0.029232	1	0.974388	1.06673	1.01396	0.519736	0.280202	0.12625	0.0786096	1	0.990211	0.970719	0.877301	0.388505	0.214847	0.0838562	0.0235653	1	1.04704	1.13415	1.02118	0.658857	0.27299	0.114056	0.0871022	12.5785	-0.181333	0	0.996427	12.3561	-0.169068	0.0763478	0.989522	11.4212	-0.157503	0	0.996348	13.0018	-0.173913
O14682	ENC1		1									1	1.0125	0.824167	0.849676	0.416929	0.0250269	0.0203716	0									1	1.10968	0.961046	0.772858	0.301666	0.126074	0	0					11.2482	-0.206137	0	0.970916					10.5543	-0.185946
O14683	TP53I11	5	3	1	1.01076	1.01959	0.908463	0.651272	0.259999	0.110816	0.0649431	1	0.974321	0.967014	0.975319	0.573158	0.270246	0.129464	0.0719798	1	1.02431	1.04545	0.992887	0.691602	0.289811	0.110607	0.0496137	1	0.960628	0.97681	0.950926	0.667441	0.277279	0.148424	0.0624889	12.9044	-0.147602	0	0.997268	12.6175	-0.152478	0.0356679	0.997323	13.2622	-0.15846	0	0.997753	13.1113	-0.146319
O14684	PTGES	1	2	1	1.18433	1.22747	1.10734	0.759333	0.490681	0.410861	0.339619	1	1.1261	1.09921	1.19498	0.733133	0.358127	0.315241	0.260073	1	1.13919	1.24602	1.1855	0.763686	0.451253	0.294358	0.218192	1	1.02957	1.26043	1.14611	0.752471	0.382955	0.255504	0.206396	14.6079	-0.130321	0.354595	0.890351	13.243	-0.211798	0.288056	0.940029	14.3106	-0.137287	0.20504	0.901485	13.7462	-0.163955
O14686-3	KMT2D	11	16	1	1.00526	1.00347	0.976578	0.704849	0.454346	0.250135	0.107916	1	0.982045	1.00794	1.03815	0.707365	0.42579	0.283758	0.182968	1	1.02234	1.2394	1.05583	1.06604	0.418017	0.23907	0.121215	1	0.98944	1.05344	1.01538	0.767939	0.412113	0.269441	0.179722	14.1905	-0.109245	0	0.996595	14.039	-0.12092	0.139871	0.992835	14.7736	-0.416345	0.178008	0.945898	14.1587	-0.132485
O14713	ITGB1BP1	1	2	1	0.986049	1.04406	1.07801	0.611184	0.286404	0.142087	0.0884899	1	0.981143	0.965038	0.866502	0.402392	0.223803	0.113574	0.123516	1	1.25037	0.936638	1.12567	0.796539	0.177099	0.143929	0.155585	1	0.952246	1.03265	0.953022	0.605365	0.248514	0.142407	0.0663314	12.8259	-0.175896	0.0875815	0.988504	11.3405	-0.165977	0.0910788	0.997569	12.8413	-0.372489	0.149795	0.945596	12.7048	-0.153107
O14715	RGPD8	1	1	1	1.3711	1.31277	1.27203	0.272798	0.184558	0	0	1	1.29439	0.91052	0.994681	0.308216	0.118134	0.0472127	0	1	1.0823	1.05077	0.910668	0.622514	0.204226	0.171138	0	1	0.783041	0.884687	0.871005	0.45355	0.0565487	0	0	11.5535	-0.606828	0.0608943	0.875453	11.2918	-0.302186	0.0407831	0.946895	12.6603	-0.153268	0	0.985277	11.558	-0.212576
O14717	TRDMT1	4	4	1	1.05275	1.03024	1.03266	0.578153	0.304333	0.218708	0.12095	1	1.11917	1.13888	1.08347	0.577992	0.250464	0.133516	0.070342	1	0.95605	0.957896	0.904845	0.498583	0.263248	0.156183	0.0856058	1	1.03138	1.05952	1.00159	0.631241	0.214017	0.0925989	0.0497867	12.6735	-0.166913	0.145343	0.989594	12.5519	-0.196071	0.0888325	0.969062	12.1132	-0.137625	0.0388818	0.99587	12.7271	-0.190552
O14727	APAF1	14	10	1	0.987069	0.975143	0.880774	0.470482	0.122099	0.0421427	0.0288984	1	0.994863	0.990408	0.927956	0.506445	0.176502	0.0540508	0.0331389	1	1.01567	0.965438	0.938218	0.497745	0.138155	0.0524134	0.0366891	1	1.00874	1.07649	1.00902	0.516259	0.164619	0.0569127	0.0386074	11.6643	-0.18084	0	0.997663	12.0247	-0.175004	0	0.999741	11.9556	-0.19438	0.00852224	0.998799	12.1305	-0.218327
O14730	RIOK3	7	7	1	1.07889	1.04599	1.04635	0.603481	0.309721	0.206422	0.0768888	1	0.99423	0.972685	0.929069	0.484484	0.170059	0.0752466	0.0384263	1	0.936199	0.966004	0.890264	0.572852	0.284164	0.138992	0.0483316	1	1.05376	1.12896	0.945464	0.537581	0.212183	0.0796544	0.0209571	12.9436	-0.152216	0.0852298	0.983692	11.9103	-0.175388	0.0100432	0.999428	12.5238	-0.132192	0	0.993705	12.2756	-0.166589
O14732	IMPA2	3	6	1	1.03922	0.997183	1.08877	0.829227	0.825015	0.817477	0.632832	1	1.00018	0.954891	0.982838	0.722794	0.513579	0.558797	0.583526	1	1.03083	1.09471	1.14522	0.851871	0.682502	0.723061	0.689745	1	0.964548	0.994471	0.952847	0.755994	0.48774	0.499577	0.452613		-0.0296384	0	0.826887		-1.28983	0.551967	0.985301		-0.801324	0.698436	0.872353	15.2621	-0.143813
O14733-4	MAP2K7	10	15	1	1.00352	0.965865	0.878443	0.442173	0.160207	0.17909	0.123519	1	0.908527	1.00188	0.919911	0.49851	0.177675	0.078039	0.0462189	1	1.02622	1.01301	0.903319	0.480455	0.204543	0.144245	0.118539	1	0.958955	1.00286	0.920093	0.491683	0.175734	0.0749837	0.0454951	11.4677	-0.174758	0.109041	0.996056	11.97	-0.168515	0.0072611	0.993436	11.8164	-0.165307	0.089993	0.999081	11.934	-0.169941
O14734	ACOT8	6	5	1	0.990272	0.978409	0.905175	0.515802	0.192415	0.0586208	0.0272724	1	0.939515	0.998169	1.04803	0.560424	0.187275	0.0643456	0.0397489	1	1.02197	0.988735	0.930416	0.610073	0.178184	0.0720187	0.0374481	1	0.969225	1.01599	0.890118	0.520843	0.187833	0.0656556	0.0391442	12.0405	-0.165914	0	0.9988	12.3639	-0.215219	0.0394859	0.993316	12.538	-0.181492	0.00159499	0.998139	12.0206	-0.161226
O14735	CDIPT	4	4	1	0.916152	0.941087	0.887108	0.478465	0.132601	0.0532983	0.0512266	1	1.0183	1.01168	0.767605	0.483301	0.191744	0.0606362	0.0242279	1	1.01347	1.10882	0.934023	0.500714	0.185242	0.0633054	0.0466038	1	0.895131	0.91108	0.894734	0.478568	0.185857	0.0707702	0.041309	11.7256	-0.174081	0	0.990151	11.3548	-0.142791	0	0.991906	12.0204	-0.1735	0.00850684	0.991648	11.8191	-0.16051
O14737	PDCD5	17	16	1	0.993903	0.982946	1.02259	0.892188	0.840455	1.09695	0.976086	1	1.00674	0.9973	1.00243	0.804073	0.596614	0.652165	0.755281	1	0.997887	0.993299	0.997935	0.954757	0.755274	0.780782	0.7864	1	0.95859	1.03119	1.03242	0.845101	0.575683	0.561488	0.616713		-0.0226863	0.952256	0.0968234		-0.836842	0.66802	0.936902		-0.569477	0.774152	0.993167		-1.03261
O14744	PRMT5	47	53	1	0.956731	0.976243	0.987817	0.805508	0.729105	0.771789	0.630968	1	1.02009	1.0016	1.05002	0.798312	0.561817	0.573676	0.584816	1	0.993254	1.01064	1.01624	0.828161	0.65866	0.604402	0.555653	1	0.989215	1.14408	1.0508	0.832978	0.56632	0.518365	0.5019		-0.0554188	0.680612	0.916041		-1.031	0.573436	0.990705		-0.0767105	0.55299	0.99459		-0.130086
O14745	SLC9A3R1	35	44	1	0.962983	0.93009	0.990302	0.85194	0.883533	0.969266	0.839244	1	1.00918	0.998114	1.05565	0.840894	0.627976	0.703221	0.7357	1	1.00683	1.03188	1.07629	1.0969	0.805484	0.82108	0.775332	1	0.997927	1.10181	1.0501	0.841207	0.617547	0.637111	0.648941		-0.0153951	0.734582	0.385471		-0.728359	0.688966	0.951711		-0.355532	0.798206	0.853169		-0.876468
O14757	CHEK1	20	23	1	1.02729	1.03456	0.998217	0.788972	0.345524	0.0552759	0.0380623	1	1.01617	0.932336	0.988383	0.725298	0.328045	0.0573014	0.0271002	1	1.01573	0.985625	1.02584	0.748209	0.248581	0.0620935	0.0377844	1	0.996764	1.01466	0.982843	0.680833	0.234084	0.055864	0.0234726	13.7893	-0.179893	0	0.996489	13.4606	-0.170081	0	0.993358	13.3069	-0.199417	0.0102271	0.998753	12.9963	-0.187142
O14763	TNFRSF10B	7	7	1	0.985032	1.00186	0.994668	0.845177	0.813948	0.824466	0.643783	1	1.03089	1.00526	1.03223	0.755923	0.522837	0.522818	0.553131	1	0.995128	0.976795	0.988895	0.911477	0.645458	0.644946	0.554733	1	0.985927	0.998821	0.955552	0.734641	0.469257	0.477032	0.452041		-0.0255543	0	0.90077		-1.1406	0.532929	0.993512		-0.103787	0.58698	0.983582	14.3364	-0.174039
O14770-6	MEIS2		2									1	1.06004	1.07346	1.08905	0.718264	0.276153	0.14819	0.122382									1	0.998513	0.962832	0.957943	0.565656	0.268556	0.150419	0.0917889					13.1798	-0.198691	0.115658	0.986069					12.5409	-0.150187
O14772	FPGT	12	13	1	1.02663	1.04788	0.938261	0.564245	0.282988	0.150803	0.0676238	1	0.956467	0.948622	0.89947	0.506038	0.169006	0.0586895	0.0289212	1	1.0311	1.01889	0.96383	0.456294	0.270343	0.134473	0.0660625	1	0.964106	0.974992	0.909812	0.501004	0.170663	0.0634681	0.0282314	12.6156	-0.134737	0.00423258	0.996781	11.9433	-0.169873	0	0.99576	11.9693	-0.165199	0.0733441	0.992969	11.9496	-0.170965
O14773	TPP1	13	13	1	0.917086	1.02202	1.00811	0.652232	0.356133	0.203546	0.0928586	1	0.931921	1.00027	0.933233	0.648387	0.343326	0.230341	0.138248	1	0.982564	0.967979	0.953375	0.682608	0.358694	0.191821	0.097491	1	1.00083	0.986843	0.926355	0.65863	0.344428	0.189554	0.123811	13.4288	-0.128623	0.0307671	0.98901	13.3023	-0.117495	0.0531863	0.994429	13.5424	-0.12246	0	0.998613	13.3296	-0.118028
O14775	GNB5	3	2	1	1.05238	1.01522	0.973188	0.796921	0.613744	0.452081	0.226032	1	0.948267	0.910113	0.926655	0.683815	0.458419	0.241662	0.0898165	1	1.01275	0.995994	0.998928	0.888596	0.496126	0.370193	0.238986	1	0.998279	1.1584	1.08833	0.864853	0.468728	0.254405	0.115483	16.3859	-0.079289	0	0.98575	13.9758	-0.1071	0	0.980558	15.1825	-0.13043	0.230377	0.995119	14.8534	-0.139783
O14776	TCERG1	39	61	1	0.965194	0.972762	0.999116	0.7644	0.504778	0.0766332	0.0231657	1	0.987539	1.00008	0.958392	0.701675	0.429709	0.163205	0.0335262	1	0.99955	1.02995	1.00319	0.728462	0.498453	0.128106	0.0257385	1	0.99032	0.986139	0.959435	0.725229	0.423845	0.161363	0.040729	14.3518	-0.153984	0	0.979881	13.8209	-0.130772	0	0.992537	14.2175	-0.138093	0	0.983179	13.9157	-0.133762
O14777	NDC80	26	24	1	1.00435	1.01046	0.994366	0.599549	0.208533	0.0771181	0.0444018	1	1.02954	0.998514	0.986302	0.604144	0.195236	0.0486042	0.0284327	1	0.984413	1.0098	0.929375	0.612899	0.226757	0.0886654	0.0478143	1	0.985867	1.0102	0.974964	0.562629	0.190617	0.0610856	0.031591	12.5825	-0.186661	0.0230795	0.999479	12.5806	-0.190292	0	0.999128	12.6505	-0.160384	0	0.999016	12.3804	-0.184072
O14782	KIF3C	4	5	1	1.0693	1.03091	0.972032	0.487334	0.0708528	0.0327806	0.043008	1	1.02845	0.978973	1.00692	0.630427	0.187897	0.0248579	0.0143473	1	1.04831	0.979913	0.962319	0.560633	0.127099	0.0344051	0.0334371	1	0.949505	1.05208	0.984802	0.575515	0.193109	0.0343932	0.0295748	11.9502	-0.301509	0.0311145	0.996136	12.6683	-0.20793	0	0.99826	12.2584	-0.225033	0.0123535	0.997842	12.444	-0.191014
O14787	TNPO2	19	19	1	1.06963	1.17416	1.23551	0.933386	0.517722	0.241746	0.0812208	1	1.06944	1.18406	1.18209	0.921545	0.487939	0.194528	0.047352	1	1.04326	1.24223	1.21651	0.915495	0.52109	0.248065	0.0957296	1	1.09245	1.156	1.23491	0.923911	0.444272	0.19847	0.0673268	15.2378	-0.157309	0.0372404	0.931775	15.0059	-0.165813	0.0013582	0.948928	15.2429	-0.149978	0.0406069	0.919437	14.7504	-0.180841
O14792	HS3ST1		2									1	0.979598	1.09117	0.999897	0.636858	0.222829	0.0885677	0									1	1.05742	1.08012	1.11647	0.577684	0.240271	0.073977	0.0305534					12.8102	-0.180904	0	0.992768					12.5953	-0.195292
O14795	UNC13B	10	14	1	0.984098	1.00803	0.881794	0.47339	0.13215	0.0579494	0.0407809	1	0.98065	0.958108	0.887996	0.500877	0.160499	0.0466336	0.0209467	1	1.03051	1.01851	0.932295	0.450846	0.154881	0.0631561	0.0398082	1	0.99328	0.942626	0.90317	0.499323	0.154695	0.0493721	0.0316805	11.6891	-0.173773	0	0.998425	11.8759	-0.172797	0	0.996823	11.7354	-0.188724	0.0193471	0.99906	11.9022	-0.176108
O14798	TNFRSF10C		1									1	0.977314	0.850234	1.0532	0.826158	0.50871	0.553196	0.516404									1	1.01132	0.8852	0.892848	0.833123	0.444605	0.463921	0.379976						-1.19205	0.526103	0.925942					14.1361	-0.196985
O14802	POLR3A	33	30	1	1.0052	0.998371	0.893087	0.468901	0.17548	0.0897595	0.0509331	1	1.00154	0.975721	0.927899	0.486451	0.174608	0.072597	0.045901	1	1.00011	0.951539	0.878191	0.41591	0.167185	0.0752895	0.0451599	1	0.987049	0.977612	0.921304	0.496018	0.175876	0.0678469	0.0498655	11.7567	-0.161556	0.00901413	0.999906	11.9198	-0.174476	0.0130709	0.999562	11.4505	-0.167043	0.00991623	0.998274	11.9551	-0.170902
O14807	MRAS	1		1	1.07648	1.15862	1.24326	0.95478	0.821634	0.935568	0.668136									1	1.0601	1.2031	1.01798	0.562773	0.640902	0.55385	0.509901										-0.0397127	0	0.508754						-0.517036	0.566704	0.900027
O14810	CPLX1		2									1	0.946702	0.889359	0.981314	0.762881	0.593654	0.483421	0.53814									1	0.861432	1.42883	1.06353	0.721345	0.530781	0.540544	0.403293						-0.0968342	0.499199	0.942348					15.6825	-0.136335
O14817	TSPAN4	1	2	1	1.07053	1.13593	1.11423	0.835526	1.06899	1.44382	1.26532	1	1.07721	1.05804	0.996105	0.765716	0.756102	0.811476	0.827517	1	1.14048	1.33335	1.10543	1.01055	1.073	1.11737	1.15964	1	0.955626	0.880272	1.01799	0.767967	0.618537	0.591649	0.637472		1.04091	1.35457	0.64918		-0.585578	0.790203	0.897635			1.26852	0.206815		-0.241961
O14818-2	PSMA7	1	1	1	0.841191	0.938378	0.887671	0.900433	1.01317	0.632828	0.573658	1	0.983964	0.891126	1.68874	1.4121	0.869685	0.795796	0.917838	1	1.00502	1.02489	1.34248	1.47776	0.746384	0.836128	0.908541	1	0.997603	1.9948	1.47483	1.11249	0.733733	0.904764	1.08051		-0.856317	0.573658	0.719638						0.0558389	1.05607	0.0100011		-0.0150518
O14818	PSMA7	44	28	1	0.986318	0.985698	0.974718	0.889868	0.854489	0.958766	0.814596	1	0.996565	0.980259	0.92175	0.721392	0.555504	0.581941	0.600592	1	0.98217	0.99566	1.00217	0.959197	0.745201	0.731489	0.706715	1	0.97028	0.950923	0.920762	0.78838	0.534422	0.505954	0.473998		-0.0402773	0.875504	0.6672		-0.0893191	0.565338	0.985114		-0.096671	0.717031	0.995315	17.7669	-0.0809154
O14828	SCAMP3	12	9	1	0.995292	1.0074	0.977218	0.621517	0.295007	0.144455	0.0477521	1	0.997477	0.989941	0.941703	0.608503	0.294079	0.140687	0.0473041	1	1.0732	1.04304	0.977194	0.719243	0.31414	0.13555	0.068242	1	0.978164	0.998144	0.969232	0.640331	0.288633	0.141821	0.0630174	12.9808	-0.142327	0	0.998681	12.855	-0.138592	0	0.999153	13.467	-0.15193	0.0128871	0.994361	13.036	-0.14377
O14832	PHYH	8	2	1	0.985788	0.996048	1.0018	0.918027	0.943799	0.862049	0.661897	1	1.04823	1.22658	1.1996	0.847325	0.516281	0.47632	0.428712	1	0.997826	1.05584	1.19702	1.0995	0.805994	0.78355	0.667196	1	0.907314	1.15208	1.02419	0.723536	0.408611	0.410734	0.32843		-0.0583909	0	0.930832	15.2965	-0.155197	0.44779	0.87415		-0.156776	0.724774	0.74278	13.5406	-0.179536
O14841	OPLAH	16	15	1	0.981656	1.04495	1.01369	0.740079	0.531933	0.188396	0.0559597	1	0.972643	0.987718	1.03639	0.737145	0.506007	0.329125	0.074332	1	0.994737	1.01344	1.06382	0.822179	0.498045	0.238964	0.0678304	1	1.00865	1.04582	1.05547	0.790894	0.500314	0.325696	0.086102	14.5557	-0.125902	0	0.983184	14.7993	-0.107218	0	0.979671	14.8704	-0.131508	0	0.992241	15.0112	-0.11224
O14867	BACH1	7	4	1	0.967864	0.993681	1.01488	0.769312	0.697759	0.734044	0.501648	1	0.991799	1.0401	0.969788	0.649761	0.487658	0.397023	0.33584	1	1.02141	1.0135	1.08942	0.929189	0.63194	0.537105	0.471604	1	0.967532	0.951121	1.01584	0.668168	0.413858	0.36551	0.243636		-0.038218	0.0352717	0.896063	14.243	-0.105021	0.322705	0.993541	19.1483	-0.10996	0.477434	0.977508	13.6917	-0.128074
O14874	BCKDK	7	9	1	0.967977	0.951274	0.868346	0.497968	0.197595	0.122903	0.0532837	1	1.00706	0.935083	0.796632	0.359937	0.129329	0.0440514	0.0213985	1	1.02777	1.00034	0.914189	0.449231	0.21331	0.125499	0.0668754	1	0.995877	0.873827	0.794886	0.349829	0.124589	0.057239	0.0187876	11.8734	-0.143281	0	0.996524	10.8682	-0.17001	0	0.996604	11.7438	-0.165091	0.0549636	0.998554	10.811	-0.16928
O14879	IFIT3	2		1	0.878977	1.15917	1.09675	0.910575	0.456466	0.335626	0.284605									1	0.898013	0.952202	0.889938	0.450184	0.42914	0.166158	0.131988									14.6553	-0.178807	0.292014	0.942279					12.423	-0.105109	0	0.961107
O14880	MGST3	6	5	1	1.03013	0.974973	0.929048	0.635994	0.37536	0.131928	0.0398222	1	0.97081	0.926663	0.936637	0.620724	0.327261	0.151295	0.0381674	1	1.00096	0.9994	1.01442	0.734427	0.349889	0.16714	0.0507974	1	1.02061	1.03224	0.998059	0.666591	0.357191	0.169783	0.0586639	13.2047	-0.13102	0	0.992907	13.0092	-0.133513	0	0.99193	13.7345	-0.144053	0	0.998226	13.4574	-0.133189
O14893	GEMIN2	5	8	1	0.963472	0.938548	0.983813	0.761709	0.84972	0.797062	0.517892	1	1.0055	0.98611	0.990445	0.771877	0.58586	0.643771	0.471661	1	1.08301	1.12173	0.979237	1.01661	0.743064	0.614197	0.501729	1	1.1091	1.06017	1.12413	0.809465	0.64759	0.591298	0.484591		-0.0326096	0	0.756752		-0.0807569	0.515918	0.960046		-0.0946458	0.505863	0.929669		-0.0825122
O14896	IRF6	11	11	1	1.00274	1.00688	1.00104	0.800752	0.384928	0.0809364	0.0331581	1	0.989674	1.00411	1.02811	0.761149	0.428006	0.150848	0.0656978	1	0.999812	0.989919	1.01688	0.752255	0.438295	0.121545	0.037996	1	0.967499	1.03998	0.973396	0.786029	0.395578	0.156896	0.0705967	14.0084	-0.170972	0	0.997709	14.1381	-0.140405	0	0.996188	14.076	-0.146528	0	0.993338	14.0941	-0.143358
O14907	TAX1BP3	6	10	1	1.16386	1.1785	1.19035	1.01305	0.836908	0.841263	0.497551	1	1.11979	1.16119	1.15034	0.825166	0.549578	0.606913	0.459485	1	0.888724	1.04041	0.910096	0.757714	0.704766	0.508523	0.390381	1	1.03166	1.08329	1.07066	0.80025	0.531988	0.452861	0.352301		-0.0815303	0	0.712835		-0.172523	0.531516	0.873698	18.3357	-0.0536102	0	0.94254	15.5738	-0.107887
O14908-2	GIPC1	1		1	1.23349	1.18063	1.13234	0.897064	0.680182	0.359966	0.164739									1	0.95691	1.13356	0.992671	32.5639	0.489805	0	0.131499									16.481	-0.116248	0	0.902313						0.525511	1.5	-0.0887912
O14908	GIPC1	8	17	1	1.01197	1.04641	1.03944	0.771777	0.404898	0.09592	0.0193652	1	0.998263	1.01936	1.01794	0.759996	0.438368	0.192908	0.0375399	1	0.994047	1.00283	0.999783	0.838117	0.39898	0.154425	0.0298618	1	0.982882	0.999113	0.998678	0.766329	0.423434	0.208476	0.041141	13.9938	-0.161901	0	0.992451	14.2254	-0.135677	0	0.994593	14.291	-0.161635	0	0.999157	14.2085	-0.133824
O14920	IKBKB	14	11	1	0.990546	0.970285	0.923286	0.567328	0.191177	0.0822469	0.0503604	1	0.997693	1.01	0.954509	0.567101	0.221965	0.0788465	0.0635666	1	1.00193	1.01352	0.932625	0.62058	0.216116	0.094116	0.060376	1	0.975374	0.973924	0.902011	0.573551	0.230427	0.0915178	0.0641847	12.3415	-0.164619	8.03941e-05	0.998557	12.4321	-0.167441	0.0186043	0.999623	12.6621	-0.16644	0.0139337	0.998851	12.4044	-0.148329
O14924	RGS12	2	2	1	1.00393	0.949944	0.878354	0.549812	0.265705	0.141043	0.0852793	1	1.12899	1.10224	0.923015	0.506695	0.120395	0.0273584	0.0147738	1	1.07435	0.996467	0.965403	0.410132	0.220177	0.129114	0.0780948	1	1.0135	1.03434	0.907785	0.435996	0.120286	0.0478075	0	12.3316	-0.127795	0	0.99771	11.9683	-0.204271	0	0.983165	11.606	-0.207283	0.104601	0.992632	11.5911	-0.193574
O14925	TIMM23	4	7	1	1.06113	0.969742	0.903681	0.445409	0.107137	0.0214602	0.00917619	1	0.994079	0.944498	0.731243	0.401569	0.123958	0.0188873	0.00630922	1	1.00973	0.948413	0.8004	0.356067	0.142926	0.0392882	0.0107205	1	1.01853	0.816034	0.827034	0.455429	0.133714	0.0355437	0.00556157	11.617	-0.200719	0	0.995994	10.7064	-0.160408	0	0.990869	10.885	-0.170563	0	0.997264	11.3791	-0.166709
O14929	HAT1	24	25	1	1.02888	1.01515	0.976633	0.677127	0.419239	0.292329	0.150121	1	1.02371	1.0332	0.944318	0.611636	0.283717	0.174388	0.0815998	1	0.970483	0.977571	0.944586	0.700383	0.373541	0.251777	0.125931	1	0.961448	0.901513	0.91052	0.594852	0.288179	0.151715	0.0799229	14.0281	-0.102783	0.0295187	0.995161	12.8617	-0.136313	0.0267418	0.9979	13.7984	-0.110856	0.00847739	0.99695	12.7199	-0.128712
O14933	UBE2L6	9	7	1	1.05293	1.12318	1.11443	0.849038	0.505096	0.19581	0.0794354	1	1.11781	1.15537	1.14407	0.794461	0.488852	0.212164	0.0533882	1	1.12007	1.11207	1.1923	0.942452	0.52865	0.213628	0.0792675	1	1.01274	1.08688	1.1024	0.821787	0.456815	0.205969	0.0607648	14.9195	-0.143181	0	0.973363	14.6883	-0.136522	0	0.951301	15.2382	-0.167569	0.03718	0.951757	14.6163	-0.141134
O14936	CASK	24	27	1	0.985049	0.996648	1.04361	0.819884	0.737616	0.671413	0.230314	1	0.920074	0.961026	0.985864	0.768585	0.591503	0.553467	0.265462	1	1.01401	1.0506	1.04878	0.866106	0.690692	0.5829	0.264103	1	1.01361	1.05644	1.05032	0.844327	0.571142	0.509333	0.276797	18.3614	-0.0782293	0	0.900933	16.9531	-0.0663195	0	0.945538	17.8866	-0.0772132	0	0.961888	16.7864	-0.0780764
O14939	PLD2	9	6	1	1.0131	0.980384	0.873699	0.49582	0.141742	0.0377842	0.0229018	1	1.04555	0.98493	0.87291	0.523391	0.242811	0.148367	0.114647	1	0.999661	0.996587	0.855314	0.451686	0.148708	0.0534185	0.0238352	1	1.00036	0.967808	0.848247	0.516782	0.237296	0.143033	0.0951445	11.7873	-0.175495	0	0.996868	12.0936	-0.13418	0.0401076	0.99764	11.5145	-0.167135	0	0.998696	12.0021	-0.126866
O14944	EREG	7	6	1	1.03562	1.08683	1.0452	0.889952	0.996222	1.23063	0.947438	1	0.956838	1.00889	1.01303	0.788572	0.653846	0.791465	0.83546	1	0.914409	0.982032	1.04265	0.902656	0.8154	0.826646	0.746611	1	0.94441	0.93064	0.993234	0.808029	0.603224	0.622152	0.656605		0.0109208	1.06807	0.0365807		-0.608229	0.760257	0.8381		-0.0449935	0.777314	0.826784		-0.98005
O14949	UQCRQ	9	7	1	1.05973	0.980045	0.897672	0.455833	0.134584	0.0357919	0.0299078	1	1.01644	0.942119	0.830772	0.464995	0.125469	0.0198452	0.00498979	1	1.03697	1.06346	0.954593	0.465607	0.147803	0.0694529	0.0183523	1	0.919853	0.941441	0.866429	0.491837	0.139631	0.0388865	0.0134773	11.6587	-0.183623	0	0.996707	11.451	-0.172841	0	0.991719	11.8469	-0.19704	0.0147471	0.996095	11.7399	-0.1747
O14950	MYL12B	57	56	1	0.990705	1.01157	1.01153	0.825375	0.761666	0.716865	0.422615	1	1.04276	1.02013	0.934483	0.681568	0.511251	0.439174	0.240182	1	1.00137	1.02784	0.991124	0.869467	0.675776	0.538444	0.309961	1	1.01301	0.952435	0.978619	0.732029	0.498009	0.356105	0.180765	20.881	-0.0498077	0	0.926819	15.2698	-0.072737	0	0.9848	17.8209	-0.0714926	0	0.990114	14.9624	-0.0894517
O14957	UQCR11		1									1	1.25308	1.30593	1.32578	0.870412	0.49383	0.33671	0.130954									1	1.26377	1.19793	1.20155	0.796495	0.478242	0.276562	0.12192					15.2011	-0.131587	0.0991818	0.820326					14.8095	-0.125701
O14964	HGS	35	27	1	1.00668	1.02102	1.03189	0.908366	0.930667	0.853834	0.214451	1	0.994225	1.03073	1.05283	0.830225	0.654539	0.643023	0.295784	1	0.931648	1.00539	1.00071	0.87271	0.780215	0.712318	0.277579	1	0.989365	1.03587	1.04257	0.8796	0.609714	0.551641	0.308889	19.6085	-0.250824	0	0.972341	18.2754	-0.0651163	0	0.931517	19.0537	-0.0871596	0	0.903495	17.6079	-0.0711171
O14965	AURKA	9	9	1	1.00894	0.978615	0.919987	0.539071	0.209508	0.0919931	0.0633485	1	1.09918	1.10366	0.985248	0.611864	0.299081	0.162278	0.0729867	1	1.01671	1.0337	0.971669	0.556302	0.209636	0.0969771	0.0567431	1	1.00966	1.01329	1.0277	0.597068	0.251977	0.101533	0.0458966	12.2238	-0.156648	0.00881712	0.999427	12.9419	-0.14286	0.0320063	0.982984	12.3665	-0.177754	0.0363818	0.998735	12.7098	-0.171926
O14966	RAB7L1	5	3	1	1.01615	1.07568	0.927532	0.520275	0.180819	0.0737855	0.0235753	1	1.11986	1.12541	1.03885	0.60824	0.244449	0.0904456	0.0740801	1	0.941856	0.965361	0.865439	0.511091	0.165431	0.063399	0.0277916	1	0.979483	0.954691	1.02457	0.572394	0.23648	0.131845	0.0470598	12.1032	-0.171551	0	0.995695	12.6905	-0.186893	0.0553785	0.977127	11.8602	-0.162262	0	0.993744	12.5372	-0.178785
O14967	CLGN	12	8	1	0.926172	1.15392	1.04495	0.755704	0.682177	0.354928	0.154441	1	0.896705	1.07618	1.08014	0.666753	0.461708	0.307144	0.150945	1	0.867507	1.02911	1.05165	0.79305	0.476109	0.251059	0.134677	1	0.911951	1.0555	0.994535	0.881659	0.530014	0.220151	0.130949	16.0316	-0.0972902	0	0.935129	14.2508	-0.107847	0.0754592	0.958532	14.7253	-0.119475	0.0245389	0.974796	15.1537	-0.13843
O14972	DSCR3	8	6	1	1.0571	1.0725	1.02964	0.747699	0.364463	0.164629	0.0776749	1	0.926437	0.889867	0.888167	0.644966	0.339649	0.179588	0.0436988	1	1.02616	0.99092	1.02785	0.725478	0.40324	0.187469	0.0605453	1	0.965227	1.04188	0.977212	0.743448	0.344403	0.187562	0.0513289	13.8359	-0.145015	0.0178087	0.991275	13.1045	-0.123845	0	0.976483	13.9491	-0.132642	0	0.995157	13.7596	-0.139926
O14974	PPP1R12A	30	39	1	0.987932	0.985406	0.989664	0.692805	0.222154	0.04549	0.0163904	1	1.0089	0.99751	1.0003	0.685725	0.243359	0.0624087	0.0246386	1	1.01854	1.00816	1.00684	0.776034	0.257432	0.0693551	0.0238556	1	0.999077	0.988461	0.984324	0.685065	0.24446	0.0688879	0.0256774	13.0073	-0.197845	0	0.999471	13.0535	-0.184683	0	0.999535	13.4536	-0.198822	0.00051027	0.999591	13.0525	-0.181212
O14975	SLC27A2	18	12	1	1.04898	1.00161	0.92614	0.498627	0.162086	0.0593632	0.0427392	1	0.996809	1.00554	0.960752	0.560321	0.156037	0.0506442	0.0252236	1	1.0359	1.02056	0.976035	0.510851	0.146486	0.0583303	0.0413176	1	0.976921	1.0395	0.918722	0.482317	0.148896	0.0521514	0.025995	11.9625	-0.177729	0.00391897	0.99817	12.3003	-0.197295	0.00180455	0.999919	12.0663	-0.214507	0.0303443	0.99878	11.857	-0.18228
O14976	GAK	29	30	1	1.06762	1.06875	1.01095	0.595929	0.205099	0.0484496	0.0147723	1	1.03624	1.04762	1.02231	0.59623	0.213436	0.0731109	0.0158557	1	1.08406	1.06342	1.03872	0.594252	0.226366	0.0634346	0.0205003	1	1.06204	1.09939	1.00672	0.60034	0.214335	0.0810598	0.0242059	12.5784	-0.190987	0	0.992712	12.6205	-0.183868	0.000961979	0.995435	12.6473	-0.182746	0.000359018	0.989245	12.6287	-0.181402
O14979	HNRNPDL	31	22	1	1.00646	1.04733	1.04003	0.795715	0.74784	0.839586	0.539996	1	1.04393	1.0046	1.02333	0.734153	0.526762	0.534369	0.433833	1	1.00619	1.07307	1.03167	0.852789	0.657116	0.656787	0.51366	1	1.04224	1.12789	1.09806	0.823145	0.507377	0.515252	0.429436		-0.0327873	0	0.801105	16.3314	-0.129714	0.476465	0.984169		-0.0669459	0.519345	0.955398	15.314	-0.164826
O14980	XPO1	96	107	1	1.01355	0.982597	0.920621	0.54436	0.18099	0.0783959	0.0498563	1	1.01021	1.00894	0.908648	0.519095	0.176719	0.0537223	0.0272582	1	1.02056	1.01796	0.920546	0.523404	0.189605	0.0797075	0.0485116	1	1.0189	0.976697	0.922666	0.515503	0.183964	0.0630919	0.0267263	12.2033	-0.166756	0.00197205	0.999099	12.044	-0.172024	0	0.999092	12.1164	-0.163301	0.00114725	0.999324	12.0692	-0.170939
O14981	BTAF1	39	41	1	1.02262	1.04045	0.927622	0.499483	0.155066	0.0712376	0.0464196	1	1.01093	0.96651	0.91467	0.51208	0.16201	0.0758558	0.0631378	1	1.01252	1.01399	0.918181	0.474513	0.153781	0.0734036	0.0457426	1	0.977348	0.989701	0.912538	0.513804	0.16444	0.0808656	0.0606493	11.9562	-0.182167	0.0153552	0.998289	11.991	-0.174373	0.0190135	0.998312	11.8136	-0.179329	0.0152506	0.999635	12	-0.171668
O15013	ARHGEF10	23	36	1	1.00415	0.994663	0.975357	0.598519	0.227375	0.0879108	0.054454	1	0.998098	1.03289	1.01186	0.640278	0.276661	0.117305	0.0682307	1	0.988859	0.978024	0.95544	0.583768	0.253389	0.0986757	0.048452	1	0.986696	1.01404	0.990745	0.662257	0.265001	0.105913	0.0638465	12.6167	-0.171939	0.0205291	0.999808	12.9679	-0.163239	0.0353257	0.997586	12.6143	-0.153155	0	0.999278	13.0193	-0.167067
O15014	ZNF609	15	16	1	1.01175	0.959782	0.951486	0.530837	0.282072	0.2075	0.123759	1	0.933391	1.01455	0.920655	0.570176	0.274261	0.209159	0.168118	1	0.987557	0.988158	0.885705	0.583669	0.252627	0.153558	0.111967	1	1.00183	1.01246	0.90972	0.582091	0.271523	0.196984	0.15483	12.3427	-0.150941	0.121146	0.996297	12.4731	-0.14469	0.134698	0.994695	12.491	-0.13096	0.0241285	0.998079	12.5395	-0.138441
O15020	SPTBN2	9	8	1	0.996124	0.948111	0.841117	0.564023	0.44229	0.378376	0.122179	1	0.95057	0.91097	0.760718	0.461336	0.27811	0.239258	0.117655	1	1.00762	0.979286	0.842438	0.585793	0.373442	0.278442	0.1202	1	1.02026	0.982583	0.775032	0.467941	0.261	0.221512	0.0989491	13.3573	-0.0835553	0	0.972454	11.5141	-0.103707	0	0.989846	12.9648	-0.0962877	0	0.994759	11.6169	-0.11088
O15031	PLXNB2	47	48	1	0.982551	0.973495	0.979856	0.67206	0.321879	0.122639	0.0434553	1	1.01695	1.02178	1.00616	0.688067	0.311203	0.112919	0.0345988	1	1.0126	1.0128	0.99716	0.723157	0.326094	0.12802	0.0518939	1	1.019	1.05504	0.993882	0.674731	0.301214	0.120368	0.0407122	13.2735	-0.147376	0	0.998233	13.3181	-0.156342	0	0.998079	13.5386	-0.152544	0	0.999393	13.2307	-0.153334
O15033	AREL1	4	2	1	0.971775	0.992929	0.946063	0.553696	0.202732	0.101843	0.0715518	1	0.9988	0.987783	0.989283	0.573867	0.259959	0.13204	0.099725	1	0.975597	0.955399	1.0037	0.626515	0.244456	0.0932443	0.0436091	1	1.00525	1.0187	1.00479	0.560211	0.243175	0.118445	0.0881591	12.3068	-0.173042	0.0408923	0.999276	12.5453	-0.168815	0.079899	0.998743	12.817	-0.171292	0.0139409	0.996989	12.4413	-0.181419
O15037	KHNYN	7	4	1	0.976	1.04706	0.972596	0.560622	0.239444	0.118828	0.0652269	1	0.963845	1.06326	1.00776	0.572327	0.231075	0.173854	0.121974	1	1.01181	1.00205	1.00227	0.511011	0.220184	0.106667	0.0608423	1	0.985181	1.03971	0.987719	0.620258	0.283049	0.164376	0.10631	12.4586	-0.164703	0.0419171	0.997165	12.4065	-0.205674	0.135692	0.994294	12.1735	-0.190252	0.0648658	0.997219	12.8557	-0.157815
O15040	TECPR2	8	5	1	1.00578	1.07682	1.04632	0.656596	0.417621	0.302364	0.223375	1	1.02801	1.11685	1.03677	0.725656	0.446584	0.295892	0.249045	1	1.02298	1.07631	1.07208	0.704777	0.365299	0.262706	0.185346	1	0.945732	1.03477	1.0442	0.733831	0.347903	0.245713	0.216437	13.5846	-0.132593	0.223051	0.983963	14.1351	-0.125166	0.21591	0.97953	13.5115	-0.155471	0.190445	0.985253	13.4528	-0.17467
O15042-2	U2SURP		1									1	1.32921	1.19204	1.14919	0.960997	0.608958	0.402874	0.216114									1	1.0182	0.84873	0.989553	0.635094	0.403258	0.253837	0.119866					16.2734	-0.119918	0.15172	0.847516					13.6819	-0.106984
O15042	U2SURP	30	24	1	1.02786	1.0103	1.00022	0.603422	0.187197	0.0764055	0.0573627	1	0.996132	0.992655	0.934377	0.508274	0.143747	0.0623147	0.0506979	1	1.01023	1.00478	0.973506	0.596955	0.180841	0.0736814	0.0564875	1	1.01714	0.971165	0.937591	0.525575	0.157499	0.0664609	0.0483269	12.5275	-0.207902	0.0444529	0.999081	11.9975	-0.192719	0.0199747	0.999518	12.4864	-0.201714	0.0367688	0.999868	12.1017	-0.186777
O15047	SETD1A	18	11	1	1.07893	1.00544	0.955089	0.642202	0.301839	0.12287	0.0775097	1	1.03385	1.03535	1.0209	0.649083	0.281138	0.120371	0.0480592	1	1.01799	1.07526	1.01728	0.690948	0.29705	0.158298	0.0718167	1	0.990981	1.11839	1.03682	0.672779	0.276723	0.119667	0.0528493	13.0575	-0.140497	0	0.994803	13.0588	-0.159483	0.0137543	0.995944	13.2828	-0.158925	0.047623	0.993576	13.1304	-0.168509
O15055	PER2	1	2	1	1.37071	1.33901	1.0262	0.846613	0.43866	0.199771	0.130212	1	1.13849	1.18206	1.01976	0.77104	0.42242	0.173768	0.0350577	1	0.983711	1.23226	1.21628	0.746861	0.385837	0.179439	0.0809776	1	1.05565	1.03497	0.946425	0.765597	0.346867	0.183181	0.0398081	14.5051	-0.151058	0.0794638	0.846312	14.1717	-0.142373	0	0.959958	13.9544	-0.152528	0.04802	0.926278	13.83	-0.143688
O15056	SYNJ2	18	17	1	1.02869	1.05182	1.03166	0.725158	0.285304	0.112067	0.0559002	1	0.980715	1.01295	1.01041	0.716359	0.349198	0.131043	0.093478	1	1.03566	1.04681	1.03566	0.743309	0.296092	0.10272	0.0593654	1	1.02604	1.06421	1.03552	0.729445	0.333362	0.136152	0.0888989	13.3622	-0.17473	0.027657	0.995874	13.5811	-0.148094	0.026499	0.997984	13.466	-0.176211	0.025017	0.995761	13.5628	-0.158749
O15062	ZBTB5	1	2	1	0.892764	0.880474	0.709456	0.54369	0.194253	0.159193	0.0400283	1	1.00213	0.955922	0.90543	0.609249	0.296738	0.270504	0.157523	1	1.03458	1.17532	1.04004	0.511271	0.282435	0.139971	0	1	1.05772	0.977264	1.0052	0.629025	0.307387	0.247315	0.164995	11.2829	-0.118449	0	0.955706	12.8513	-0.121134	0.110543	0.993246	12.4783	-0.156825	0.00963124	0.965891	12.9001	-0.165005
O15063	KIAA0355	3	6	1	0.958116	1.06801	0.957781	0.602704	0.396134	0.214578	0.125595	1	1.08725	1.08181	1.03222	0.653045	0.266821	0.103986	0.0486014	1	1.11331	1.01853	0.985914	0.721929	0.31374	0.186976	0.106416	1	1.06937	1.12411	1.02895	0.629406	0.261121	0.102493	0.0432214	13.3584	-0.10998	0.00740963	0.989695	13.01	-0.170141	0.0210023	0.987713	13.4483	-0.156238	0.0825333	0.988542	12.8939	-0.168882
O15066	KIF3B	12	11	1	1.01476	1.0409	1.01092	0.663432	0.207582	0.0981893	0.0580812	1	1.04139	1.03522	1.01924	0.684275	0.253379	0.044229	0.0264634	1	0.971495	1.0162	1.0148	0.802472	0.236526	0.0767805	0.0577658	1	0.972768	0.995499	0.982736	0.687131	0.276319	0.0495277	0.0292059	12.8208	-0.20584	0.0518388	0.998176	13.0673	-0.186739	0	0.99626	13.4133	-0.227679	0.0444914	0.998969	13.1318	-0.176389
O15067	PFAS	52	57	1	0.983906	0.987085	1.01237	0.825889	0.696624	0.43379	0.0472223	1	1.00426	1.02824	0.998903	0.752683	0.570076	0.514487	0.180125	1	0.999646	1.0217	1.02486	0.867116	0.661722	0.485209	0.125163	1	1.00143	1.0324	1.02131	0.799318	0.562658	0.465197	0.207492	16.5056	-0.121647	0	0.957	16.1364	-0.0773794	0	0.957529	16.7295	-0.102571	0	0.970698	16.1539	-0.0822397
O15068	MCF2L	4	1	1	0.963677	1.00535	0.772157	0.450602	0.192693	0.105195	0.114781	1	0.799295	0.908412	1.05961	0.595187	0.259179	0.167932	0.102822	1	0.972794	1.03187	0.973203	1.16704	0.192561	0.1063	0.11194	1	0.826172	1.05284	0.974141	0.488115	0.205081	0.167772	0.122462	11.2704	-0.131994	0.00662098	0.99602	12.6101	-0.19439	0.121849	0.946084	14.709	-1.58715	0.10912	0.980042	11.9538	-0.211637
O15084	ANKRD28	17	19	1	1.00908	0.974572	0.897106	0.506719	0.136279	0.0498993	0.0297508	1	1.06497	0.983073	0.931433	0.524698	0.133014	0.0266795	0.0181775	1	0.982726	0.967638	0.873731	0.509718	0.147415	0.0540924	0.0335237	1	1.01918	0.996914	0.917368	0.506584	0.142038	0.0479165	0.0141827	11.9066	-0.18072	0	0.997842	12.0756	-0.202761	0	0.996192	11.8592	-0.169581	0	0.996281	11.9657	-0.187696
O15085-2	ARHGEF11	16	11	1	0.988825	1.02756	1.01046	0.625764	0.244762	0.103472	0.0554539	1	0.966626	1.05011	1.04711	0.635619	0.235452	0.0988735	0.0451857	1	0.976001	1.01543	0.998173	0.66055	0.239028	0.0950686	0.0592207	1	1.03255	1.10133	1.04996	0.67443	0.255131	0.111626	0.0430464	12.7994	-0.175177	0.0335795	0.998099	12.8204	-0.187008	0.0360482	0.993724	12.9197	-0.182096	0.0341451	0.999121	13.0597	-0.17996
O15091	KIAA0391	15	17	1	0.96549	0.942538	0.839778	0.41814	0.101598	0.0542831	0.0334015	1	1.04233	0.974343	0.844797	0.449621	0.108173	0.0313676	0.0264655	1	0.99675	0.992406	0.860261	0.41515	0.112104	0.0435313	0.0265775	1	0.998586	0.976175	0.838764	0.422076	0.116842	0.0369459	0.0248048	11.248	-0.174654	0	0.994715	11.4184	-0.17693	0	0.994899	11.3284	-0.18072	0	0.999022	11.2784	-0.174751
O15111	CHUK	24	25	1	1.00267	0.981187	0.909111	0.507406	0.139863	0.0583266	0.0485376	1	0.993577	0.990941	0.901354	0.499159	0.163473	0.0398037	0.0180758	1	0.98318	0.951372	0.863633	0.47677	0.151755	0.0454229	0.0218527	1	1.00227	0.984414	0.929796	0.513515	0.162065	0.043079	0.0184352	11.9395	-0.178922	0.0017286	0.998503	11.9101	-0.177334	0	0.998715	11.6635	-0.168718	0	0.99593	12.0443	-0.184984
O15116	LSM1	4	11	1	0.975307	1.01911	1.0538	0.85488	1.0152	1.05103	0.772723	1	1.02632	1.05272	1.0242	0.812716	0.617194	0.627606	0.630115	1	1.05651	1.01756	1.0303	0.78351	0.851719	0.798578	0.679702	1	0.97751	1.04141	1.08281	0.796369	0.59627	0.571618	0.506468		0	0	0.609516		-0.882766	0.624972	0.985088		-0.260343	0.776664	0.857579		-0.118153
O15118	NPC1	13	14	1	0.994771	1.0064	1.00378	0.81048	0.634503	0.4321	0.201771	1	1.01397	1.00029	1.00537	0.77057	0.533253	0.377035	0.223961	1	1.01121	1.06696	1.08869	0.888027	0.573604	0.400834	0.20139	1	1.01021	1.05235	1.06015	0.858218	0.522418	0.356753	0.21874	16.3835	-0.0867915	0	0.988669	15.5214	-0.0862716	0.0122785	0.99551	16.0975	-0.102512	0.0613077	0.978468	15.3902	-0.114765
O15120	AGPAT2	3	3	1	1.04277	0.975912	0.939579	0.530972	0.216391	0.111941	0.0491012	1	0.957521	1.15733	0.95388	0.594787	0.26116	0.169645	0.0685183	1	1.00304	1.04186	0.958616	0.482744	0.228265	0.126168	0.0745934	1	0.960066	0.923291	0.922359	0.596151	0.249793	0.131295	0.0883294	12.2404	-0.15861	0.0160393	0.997919	12.7038	-0.146817	0.0389428	0.97809	12.0021	-0.174771	0.0719527	0.997155	12.6126	-0.144225
O15121	DEGS1	2	3	1	0.952139	1.08359	1.16648	0.60372	0.451994	0.204349	0.0827075	1	1.06919	1.09409	1.02506	0.781666	0.401056	0.151835	0.0725788	1	1.12824	1.13132	0.947874	0.787426	0.451796	0.181687	0.0549544	1	1.07822	1.12069	1.11456	0.717014	0.353665	0.165609	0.0706861	13.8001	-0.121626	0.00338036	0.943267	14.116	-0.145083	0	0.987898	14.3506	-0.135491	0	0.97035	13.674	-0.151656
O15126	SCAMP1	14	15	1	1.01448	1.09197	1.08373	0.914737	0.875024	0.94693	0.726495	1	1.02231	1.06871	1.14753	0.846937	0.656372	0.682128	0.598117	1	0.989937	1.00995	1.08532	0.983889	0.732512	0.719223	0.617555	1	1.0431	1.04901	1.03672	0.872738	0.571494	0.506077	0.498635		-0.0276955	0	0.670603		-0.148101	0.642398	0.901732		-0.0980953	0.658989	0.942744	20.0065	-0.130946
O15127	SCAMP2	3	4	1	1.03673	0.968967	0.976904	0.850886	0.898572	1.00713	0.70666	1	1.00511	1.07315	1.00186	0.646428	0.543072	0.498904	0.461681	1	1.01885	1.03659	0.9429	0.777239	0.754007	0.701853	0.563491	1	1.11268	1.16282	1.31056	0.989724	0.675573	0.561832	0.477238		-0.0141526	0	0.457011	16.3162	-0.148494	0.490369	0.984039		-0.0332236	0	0.957209		-0.126695
O15131	KPNA5	5	1	1	1.01283	0.938039	0.925861	0.59478	0.230016	0.101802	0.0728142	1	0.948774	1.11894	1.00517	0.612659	0.327509	0.173382	0.0812915	1	0.885141	0.956768	0.887977	0.529841	0.223451	0.0965649	0.0651857	1	1.1165	0.923101	1.05613	0.682395	0.386268	0.160698	0.0454218	12.5583	-0.153788	0.0114669	0.996069	13.0711	-0.138115	0.037338	0.982294	12.1299	-0.144578	0	0.986325	13.6616	-0.137654
O15143	ARPC1B	25	25	1	0.99234	1.0135	1.04183	0.788347	0.675089	0.783115	0.32324	1	0.977658	0.985447	0.868786	0.671596	0.500273	0.454878	0.290376	1	0.985108	0.928639	0.867101	0.635846	0.602446	0.468187	0.276128	1	0.975669	0.87274	0.909462	0.732062	0.472846	0.38014	0.240855	19.8304	-0.0527632	0	0.817566	15.3274	-0.0651527	0	0.99104	15.781	-0.0609988	0	0.963629	14.9596	-0.0775687
O15144	ARPC2	50	48	1	0.984575	0.975459	1.01111	0.901037	0.849041	0.833447	0.449943	1	0.975427	0.954915	0.992825	0.789579	0.577576	0.539005	0.401255	1	1.01183	1.02095	1.04555	0.907406	0.751894	0.659806	0.442634	1	1.00778	1.06792	1.03188	0.87617	0.568371	0.503497	0.367507	20.8214	-0.0933349	0	0.892604	17.5052	-0.0740217	0.350438	0.981424	20.2525	-0.0572063	0	0.976442	16.5642	-0.0999993
O15145	ARPC3	14	16	1	0.952561	0.961361	0.948649	0.759109	0.42081	0.18638	0.0797057	1	1.03849	1.01433	1.03152	0.757425	0.469562	0.241274	0.045222	1	0.98945	0.994956	0.909109	0.760136	0.463631	0.206689	0.0958651	1	0.98206	0.997073	1.00007	0.805872	0.483291	0.252038	0.064165	14.1166	-0.128595	0	0.994602	14.4598	-0.125448	0	0.98945	14.3112	-0.118084	0	0.99328	14.7412	-0.125912
O15151	MDM4	3	6	1	1.0849	1.16369	1.12437	0.798779	0.415579	0.235253	0.0735341	1	1.01737	0.996973	0.982615	0.724901	0.414439	0.184449	0.0826134	1	1.0133	1.02617	1.03438	0.767032	0.402344	0.17266	0.0842552	1	0.986693	0.981042	1.01618	0.700954	0.376017	0.166526	0.0776503	14.4037	-0.137706	0.0197382	0.958085	13.9643	-0.126602	0	0.99839	14.1099	-0.137777	0.00145121	0.996812	13.7057	-0.13336
O15155	BET1	3	3	1	0.88026	0.956887	0.924285	0.658262	0.430193	0.267916	0.137888	1	1.0224	1.01025	0.999587	0.695215	0.379788	0.240833	0.132015	1	1.01226	1.05415	1.01921	0.81274	0.387737	0.230964	0.146561	1	1.04413	1.11459	0.985014	0.686611	0.366778	0.218678	0.142221	13.8361	-0.0988652	0	0.97785	13.7383	-0.124621	0.0725563	0.997192	14.1243	-0.154834	0.126876	0.995854	13.5684	-0.12999
O15156-2	ZBTB7B	2	1	1	0.998153	1.0806	0.959654	0.438492	0.153241	0.0909144	0.0421501	1	0.844732	0.98191	0.934531	0.684134	0.22482	0.259521	0.173435	1	0.956671	1.01518	1.02458	0.569595	0.131239	0.0919339	0.0402255	1	0.773625	1.14431	0.795049	0.692025	0.33452	0.173693	0.160576	11.7155	-0.210103	0.0504402	0.994979	12.6048	-0.315049	0.211481	0.964554	12.278	-0.265532	0.0594105	0.997111	13.1359	-0.105591
O15160	POLR1C	12	15	1	1.00147	1.02039	0.949705	0.533721	0.190763	0.0686462	0.0399371	1	1.01748	0.990142	0.936459	0.556058	0.192837	0.0512153	0.0369458	1	1.027	1.02924	0.970434	0.463683	0.207715	0.0742754	0.040013	1	1.00082	0.932732	0.922944	0.570835	0.201173	0.0598373	0.0267263	12.2169	-0.174349	0.0051464	0.99964	12.3039	-0.175069	0	0.99922	11.9246	-0.183878	0.0327507	0.99653	12.3695	-0.170857
O15162	PLSCR1	5	4	1	1.05256	1.04757	1.09961	0.984084	0.99746	1.25312	1.0837	1	1.05198	0.978385	0.982892	0.843052	0.715499	0.793666	0.83747	1	1.04025	1.0425	1.07873	1.03981	0.863936	0.917625	0.825746	1	1.0371	0.997185	0.993811	0.798036	0.577365	0.668358	0.675617			1.22148	0.134926		-0.574968	0.782212	0.887468		-0.12763	0.868793	0.751322		-0.898943
O15164	TRIM24	11	9	1	0.957646	1.03748	1.04259	0.679111	0.35016	0.170567	0.06987	1	0.950157	0.996208	0.922057	0.625919	0.341314	0.202823	0.0993522	1	1.03967	1.09594	1.0358	0.613905	0.346191	0.16662	0.067274	1	0.923558	0.948345	0.916801	0.68006	0.320784	0.17753	0.0847724	13.5181	-0.138876	0.0125439	0.991701	13.1582	-0.116196	0	0.997016	13.1978	-0.135985	0.0148784	0.983805	13.3108	-0.127076
O15169	AXIN1	2	1	1	0.958391	0.985014	1.1055	0.770938	0.325158	0.226406	0.0948743	1	1.02177	0.994605	1.04736	0.646699	0.271273	0.0072978	0.0585046	1	0.879299	0.796073	0.900745	0.536784	0.274354	0.120403	0.0893775	1	1.1119	0.954144	1.12936	0.607858	0.200038	0.0450497	0.0922634	13.6943	-0.17072	0.110834	0.983197	12.9502	-0.182249	0	0.991152	12.3195	-0.130317	0	0.942035	12.5192	-0.241646
O15173-2	PGRMC2	21	18	1	0.977768	0.958375	0.985559	0.818826	0.767041	0.920989	0.691518	1	0.985306	1.02664	0.97768	0.767945	0.591215	0.642763	0.592431	1	1.00897	1.02395	0.974427	0.596416	0.725876	0.698098	0.616794	1	0.987386	1.04068	1.02805	0.838434	0.58725	0.541815	0.50226		-0.0790967	0.792794	0.685401		-0.932639	0.608803	0.988117		-0.939854	0.659296	0.950122		-0.111368
O15182	CETN3	13	13	1	1.01417	1.00901	0.983416	0.695832	0.593108	0.659802	0.552714	1	0.985644	1.01656	0.955057	0.654344	0.437898	0.439273	0.486635	1	1.02178	1.06388	1.04277	0.847352	0.536349	0.49226	0.518283	1	0.974834	0.983413	0.948218	0.644341	0.382967	0.393946	0.38746		-0.131271	0.598316	0.979087	13.7988	-0.164483	0.447156	0.99168		-0.173694	0.505356	0.985183	13.1984	-0.160275
O15194	CTDSPL	1	2	1	0.968743	1.07765	0.920593	0.622946	0.245579	0.0479417	0.0657984	1	1.0005	0.863787	0.940253	0.677246	0.255131	0.122564	0.102737	1	1.05246	1.13287	1.0321	0.559222	0.338042	0.0790741	0.0412851	1	1.08124	1.31384	1.10792	0.731657	0.307124	0.149981	0.0982799	12.7102	-0.162319	0	0.991543	12.9975	-0.171427	0.0644617	0.981523	12.8078	-0.148755	0	0.974381	13.423	-0.178921
O15198	SMAD9	5	9	1	0.981264	0.956228	0.965522	0.633073	0.236358	0.0892484	0.0326184	1	0.924863	1.01278	1.01375	0.645384	0.334327	0.12654	0.0433135	1	1.02841	1.0272	1.05616	0.705803	0.299082	0.106239	0.0442529	1	0.967279	0.975827	1.01252	0.722308	0.321453	0.120578	0.0369513	12.8086	-0.167581	0	0.998175	13.2288	-0.144721	0	0.991168	13.3669	-0.166112	0.00595387	0.99465	13.5116	-0.157817
O15211	RGL2	3	3	1	0.967709	0.914939	0.868193	0.537065	0.257183	0.194453	0.124594	1	1.0284	1.00669	1.0033	0.574111	0.290768	0.226003	0.118294	1	0.940455	0.949619	0.872453	0.561866	0.239625	0.119681	0.10453	1	0.994701	1.034	0.947813	0.619716	0.271731	0.186041	0.110618	12.2175	-0.123248	0.0437549	0.990937	12.6217	-0.162351	0.13923	0.99419	12.2972	-0.131494	0	0.992431	12.8138	-0.14809
O15212	PFDN6	19	21	1	1.02548	1.04995	1.07042	0.883832	0.810753	0.916269	0.725194	1	0.95727	0.961537	0.973802	0.79227	0.606399	0.628843	0.63518	1	0.996629	1.06945	1.03261	0.915583	0.685686	0.646607	0.616073	1	0.996136	1.03163	1.02336	0.832788	0.573587	0.582759	0.576209		-0.315016	0.817405	0.751619		-1.16256	0.623474	0.979016		-0.0944642	0.623144	0.975111		-1.00632
O15213	WDR46	1		1	0.960079	1.06802	0.852503	0.425744	0.237475	0.0898607	0.0598551									1	1.07556	1.17481	0.960744	0.467857	0.197483	0.0984444	0.0693287									11.5643	-0.143552	0.000977235	0.993242					11.8853	-0.191423	0.0646995	0.975907
O15226-2	NKRF	17	10	1	0.9832	0.940661	0.766361	0.376233	0.171422	0.106895	0.0409193	1	1.0058	0.964649	0.808235	0.388142	0.155016	0.0948204	0.0570307	1	1.019	0.965286	0.788636	0.391014	0.182845	0.112742	0.0565169	1	1.05401	1.00148	0.860906	0.408633	0.15979	0.0967213	0.068646	10.8797	-0.145129	0	0.997301	11.076	-0.154715	0.00743741	0.999087	11.0686	-0.142657	0	0.998995	11.3291	-0.168936
O15228	GNPAT	21	24	1	1.00815	0.989596	0.890583	0.508815	0.150036	0.0568617	0.0432116	1	0.996805	0.967136	0.901566	0.49322	0.145248	0.0490586	0.0265935	1	0.984335	0.944081	0.88707	0.524881	0.150104	0.061803	0.0433129	1	1.00045	0.981961	0.883233	0.491466	0.152016	0.0561458	0.0350368	11.9086	-0.171407	0	0.99826	11.8598	-0.179209	0	0.99834	11.9785	-0.169919	0	0.995038	11.8029	-0.169896
O15230	LAMA5	11	3	1	1.04171	1.04606	1.01077	0.646147	0.397642	0.27852	0.134256	1	0.86355	0.914155	0.871581	0.479771	0.335714	0.200447	0.131504	1	0.987967	1.02711	0.998799	0.711132	0.359896	0.237354	0.129706	1	0.973423	0.805022	0.942764	0.701001	0.296567	0.183837	0.118943	13.6746	-0.115278	0.0786284	0.988124	12.189	-0.112826	0.0380107	0.967004	13.6744	-0.134238	0.0922364	0.997208	13.2754	-0.15178
O15231-3	ZNF185	2		1	0.921555	1.07012	0.995705	0.626905	0.681782	0.659771	0.477603									1	1.02644	1.09279	0.93707	0.656686	0.68116	0.527919	0.35281										-0.21494	0.605409	0.891625					17.6486	-0.0546275	0	0.936429
O15231-6	ZNF185		10									1	0.966504	0.988114	1.01386	0.737552	0.583677	0.532322	0.392534									1	0.988361	1.07422	1.05037	0.854907	0.542292	0.469039	0.347363					17.1691	-0.0767373	0.366393	0.977051					15.918	-0.108457
O15231-8	ZNF185	19		1	0.976691	0.983767	1.04129	0.853151	0.806067	0.789266	0.527604									1	0.967685	1.00924	1.04962	0.975798	0.686247	0.598239	0.447223										-0.0410197	0	0.892573					19.636	-0.0864104	0.435315	0.97314
O15234	CASC3	5	5	1	0.953472	0.991361	1.00638	0.845652	0.757399	0.67344	0.510761	1	1.00701	1.20343	1.17312	0.793849	0.579224	0.469372	0.457328	1	1.02909	1.18668	1.11271	0.693383	0.62984	0.514455	0.463264	1	1.04949	1.24019	1.11942	0.846625	0.507532	0.409495	0.353094		-0.0429608	0	0.970258	16.5775	-0.117991	0.457533	0.884314		-0.14465	0.522334	0.891056	15.0898	-0.135386
O15235	MRPS12	8	7	1	1.0175	1.01414	1.05128	0.738246	0.546928	0.437638	0.193741	1	0.904693	0.94508	0.952793	0.708838	0.426118	0.319353	0.187263	1	1.02976	0.987788	0.993474	0.682783	0.503028	0.327781	0.159318	1	0.965162	1.02254	0.951314	0.806485	0.460935	0.279018	0.171526	15.6963	-0.0833239	0	0.973132	14.2654	-0.0976554	0.0577102	0.981281	14.6372	-0.0923013	0	0.98908	14.7182	-0.1124
O15254	ACOX3	18	9	1	1.02681	1.02719	1.05563	0.841125	0.772295	0.790967	0.617411	1	0.947714	0.992519	1.02274	0.728226	0.494436	0.508839	0.479344	1	1.0158	1.04911	1.05495	0.789179	0.686225	0.633287	0.54617	1	1.01212	1.1169	1.10728	0.802147	0.499167	0.485407	0.431		-0.0353544	0.527744	0.892012	13.4456	-0.425684	0.494157	0.991262		-0.072255	0.566766	0.959645	14.8437	-0.168799
O15258	RER1	3	5	1	0.920536	0.920719	0.842897	0.602317	0.246023	0.177583	0.0967098	1	1.05284	1.0075	0.931783	0.551434	0.199788	0.0690559	0.0196617	1	0.921423	0.928327	0.907786	0.527585	0.222583	0.111015	0.0507911	1	0.987387	0.93132	0.883793	0.492521	0.194146	0.0724954	0.0230698	12.4615	-0.120161	0	0.981015	12.2902	-0.170297	0	0.997565	12.1779	-0.147054	0	0.990221	11.8675	-0.158577
O15259-4	NPHP1		2									1	0.878051	0.910442	0.914839	0.551182	0.262422	0.180228	0.0917883									1	1.0047	1.31086	1.05067	0.67665	0.288883	0.199094	0.100935					12.4229	-0.13368	0.0385455	0.976003					13.1287	-0.172419
O15260	SURF4	8	9	1	0.979418	0.979212	1.00319	0.623661	0.264353	0.136503	0.102106	1	1.04718	1.05735	0.933152	0.56164	0.238192	0.077265	0.0336797	1	1.02763	1.06045	1.03087	0.614802	0.299226	0.157722	0.0803833	1	0.977041	0.973155	0.944843	0.563385	0.231863	0.0874145	0.0325424	12.7959	-0.17309	0.0830954	0.998359	12.4197	-0.15824	0	0.995441	12.9347	-0.15618	0.0633387	0.991847	12.4397	-0.159456
O15264	MAPK13	10	16	1	1.04101	0.99152	0.948083	0.767629	0.367088	0.075355	0.047028	1	1.12497	1.04507	1.04378	0.737926	0.41873	0.128722	0.0624429	1	1.0322	1.00907	1.03893	0.801569	0.443332	0.0920059	0.0507341	1	1.02269	1.11523	1.03867	0.757491	0.406046	0.147024	0.0609894	13.7833	-0.162947	0	0.994724	13.9745	-0.142928	0	0.980732	14.2773	-0.160676	0	0.992739	14.0313	-0.143894
O15265-2	ATXN7	2	1	1	1.06011	0.982062	0.8163	0.380719	0.287909	0.275063	0.231506	1	0.711616	0.99451	0.726478	0.237635	0.115624	0.120631	0	1	0.926448	0.981681	0.682052	0.462458	0.23695	0.166581	0.144984	1	0.928976	0.789694	0.590811	0.140944	0.107055	0.0639172	0.088051	10.881	-0.1812	0.245661	0.995059	10.1543	-0.196844	0.0356153	0.92573	11.0248	-0.110385	0	0.990673	8.82471	-0.153966
O15269	SPTLC1	11	18	1	1.00817	0.941846	0.865565	0.491753	0.126219	0.0261892	0.00921947	1	0.992661	0.95757	0.866407	0.465652	0.133517	0.0358931	0.00919829	1	1.02317	0.939273	0.90294	0.321277	0.157489	0.0495113	0.0171043	1	0.992694	0.91424	0.853903	0.470126	0.1441	0.0377924	0.0113556	11.7313	-0.181292	0	0.993309	11.6042	-0.177342	0	0.996238	11.093	-0.208339	0.0281046	0.994572	11.5851	-0.170511
O15270	SPTLC2	21	23	1	1.05955	1.01687	0.922351	0.500496	0.122387	0.0267569	0.0135027	1	1.04153	1.01899	0.950196	0.552765	0.176467	0.0590699	0.0331342	1	1.01392	0.972286	0.920385	0.48726	0.146539	0.036493	0.013461	1	0.996473	1.01975	0.919307	0.514342	0.16684	0.0563649	0.0334349	11.9373	-0.202556	0	0.996592	12.286	-0.181636	0	0.998497	11.8827	-0.188761	0	0.998813	12.0323	-0.17569
O15287	FANCG	10	13	1	0.957555	0.950799	0.869621	0.489315	0.180218	0.0852358	0.0436039	1	0.999547	1.00999	0.927657	0.52248	0.209461	0.086111	0.0518799	1	0.966591	0.941357	0.874722	0.65101	0.197294	0.0841776	0.0455587	1	0.990994	0.999242	0.953808	0.559988	0.195882	0.0872484	0.0564773	11.7886	-0.154103	0	0.99597	12.162	-0.159135	0.00445319	0.999876	12.7066	-0.167163	0	0.98796	12.3427	-0.17751
O15294	OGT	38	45	1	0.991921	0.963727	0.968672	0.635112	0.260677	0.0969093	0.0324102	1	1.00553	1.01448	0.94856	0.640174	0.297069	0.118661	0.0392183	1	1.02521	1.00669	0.982414	0.656409	0.298996	0.110647	0.0367666	1	0.998759	0.983873	0.99063	0.658823	0.305374	0.120056	0.0405776	12.8869	-0.160536	0	0.998643	13.007	-0.146546	0	0.999009	13.1186	-0.15304	0	0.998641	13.1681	-0.150498
O15304	SIVA1	2		1	1.11946	1.24084	1.12107	0.763264	0.267709	0.0832887	0.0870848									1	0.944413	1.03119	0.983093	0.199433	0.228903	0.102696	0.0586743									13.3685	-0.208184	0.0614399	0.947091					10.769	-0.419269	0.127644	0.986615
O15305	PMM2	19	21	1	0.975668	0.97426	0.997123	0.869509	0.699258	0.368042	0.0260681	1	0.947428	0.992154	1.02014	0.830106	0.580016	0.460047	0.116265	1	0.992181	0.999441	1.01712	0.973659	0.6748	0.445888	0.0880532	1	0.987374	1.09433	1.04361	0.887066	0.574361	0.44116	0.156644	16.3782	-0.143454	0	0.974884	16.0535	-0.0966497	0	0.965439	16.7529	-0.127157	0	0.982049	16.2286	-0.0992615
O15315	RAD51B	1	2	1	0.950905	1.09775	0.756555	0.474687	0.229968	0.178195	0.08995	1	1.03328	0.95534	0.864072	0.485907	0.193371	0.0724088	0.0117825	1	1.02514	0.926326	0.970303	0.511272	0.161246	0.0973939	0.0597677	1	1.00264	1.11568	0.995463	0.60285	0.18713	0.0353165	0	11.5019	-0.120102	0	0.984785	11.7708	-0.156621	0	0.99587	12.0634	-0.208099	0.0573008	0.995286	12.5526	-0.202186
O15318	POLR3G	5	8	1	0.916933	0.905671	0.906603	0.790797	0.635919	0.392753	0.266234	1	1.02752	1.10105	1.22117	0.844826	0.50051	0.344714	0.191168	1	1.00211	1.01718	1.07913	0.982168	0.576338	0.383791	0.263453	1	0.997191	1.11017	1.03059	0.73414	0.449011	0.310672	0.174272	16.2796	-0.0752442	0	0.956465	15.1288	-0.126029	0.163271	0.935478	15.7253	-0.155063	0.274126	0.986694	14.4354	-0.110493
O15320-5	CTAGE5	20	20	1	0.945185	0.992456	1.01255	0.852783	0.809129	0.774205	0.380709	1	1.00759	1.00325	1.03194	0.805561	0.579843	0.524229	0.32799	1	1.01641	1.03844	1.04611	1.01694	0.724641	0.6106	0.358533	1	1.02941	1.0775	1.06671	0.851376	0.561581	0.480217	0.301866	20.3008	-0.0693656	0	0.871687	16.9928	-0.0728729	0.185493	0.978512	18.891	-0.078185	0.0136104	0.96663	16.3299	-0.0917936
O15327	INPP4B	8	4	1	1.0286	1.03744	1.03678	0.724271	0.416563	0.203383	0.090499	1	0.98166	1.09614	1.1422	0.712522	0.366053	0.176284	0.0477802	1	0.937609	0.961332	1.03334	0.646479	0.399716	0.167557	0.104229	1	0.958646	1.08922	0.998282	0.681807	0.364065	0.156419	0.0694863	14.0618	-0.125421	0	0.993349	13.7834	-0.145213	0.00398316	0.971102	13.5799	-0.124901	0.00709528	0.985648	13.5387	-0.134558
O15344	MID1	13	11	1	0.973747	1.15577	0.990796	0.535435	0.317437	0.0661226	0.0996556	1	1.27903	1.03339	0.911602	0.551207	0.181367	0.0614862	0.0472524	1	0.876331	0.957422	0.81759	0.534295	0.198162	0.0771455	0.0886163	1	0.979135	0.966691	0.941862	0.560132	0.188471	0.055463	0.0413774	12.5347	-0.151689	0.0350337	0.972335	12.2183	-0.168942	0	0.951774	11.8359	-0.137548	0	0.9777	12.326	-0.176141
O15347	HMGB3	14	20	1	0.980149	1.02214	1.10037	0.910871	0.895548	0.947567	0.747391	1	1.05697	1.1535	0.930335	0.653111	0.464219	0.48901	0.414138	1	1.05686	1.00546	1.05243	0.827612	0.785929	0.703092	0.625276	1	0.966159	0.890502	0.913645	0.68527	0.500683	0.36027	0.289561		-0.0277583	0	0.663174	14.6257	-0.111193	0.422514	0.951977		-0.0431328	0.575058	0.935092	14.9705	-0.0723717
O15350	TP73		2									1	1.03054	0.948019	1.031	0.648901	0.27765	0.141255	0.129834									1	0.960941	1.07824	0.99612	0.526018	0.295597	0.118414	0.0648851					12.9073	-0.182503	0.111999	0.994433					12.4739	-0.152471
O15355	PPM1G	42	50	1	0.994683	0.994905	1.03065	0.864761	0.82555	0.84653	0.484748	1	1.01021	1.0196	1.05058	0.815609	0.631953	0.627846	0.549953	1	1.00473	1.03228	1.02307	0.925008	0.740376	0.675225	0.519186	1	1.01507	1.03247	1.02786	0.860048	0.593989	0.554818	0.464974		-0.0553893	0	0.840479		-0.103317	0.58333	0.979518		-0.0510486	0.304149	0.979538	19.6738	-0.0994269
O15357	INPPL1	19	26	1	1.00164	1.0256	1.01275	0.805426	0.420053	0.0953575	0.0377023	1	1.00506	0.983912	0.942793	0.697877	0.387354	0.125612	0.0317169	1	1.01722	1.03784	1.04747	0.845022	0.436768	0.120884	0.0454477	1	1.04614	1.0052	1.04666	0.752408	0.424277	0.140442	0.0365252	14.188	-0.164218	0	0.996145	13.5758	-0.139777	0	0.994462	14.4463	-0.16654	0	0.995539	14.0626	-0.146017
O15360	FANCA	9	13	1	1.01466	1.02126	0.900134	0.454297	0.117049	0.0359376	0.0272752	1	1.0135	1.08936	0.95878	0.484584	0.194797	0.11553	0.103134	1	1.04953	1.02144	0.936398	0.419123	0.117399	0.0399893	0.0199405	1	1.03112	0.943833	0.89258	0.498476	0.192141	0.100103	0.0705902	11.6474	-0.190429	0	0.998766	11.9342	-0.197389	0.0920992	0.993854	11.5842	-0.207797	0.00613217	0.99811	11.9172	-0.153937
O15370	SOX12	1		1	0.985533	0.950507	1.0495	0.740218	0.685365	0.598259	0.482677									1	1.07793	1.05423	1.15161	0.894794	0.640917	0.462058	0.423662										-0.0627994	0.457511	0.940612					17.118	-0.103056	0.390018	0.943062
O15371	EIF3D	48	56	1	1.04483	1.06194	1.02051	0.701218	0.215164	0.0510532	0.0331579	1	0.986417	0.979894	0.931626	0.64117	0.299977	0.125946	0.100802	1	0.950711	0.98737	0.941687	0.619777	0.237987	0.056345	0.030124	1	0.9852	0.950494	0.944146	0.690949	0.296189	0.129468	0.0942967	13.0232	-0.204795	0.00890598	0.995392	13.0083	-0.136642	0.01093	0.99858	12.7052	-0.170236	0	0.996763	13.2319	-0.150841
O15372	EIF3H	34	45	1	1.03272	1.04236	1.00012	0.883902	0.58153	0.316933	0.0691807	1	0.975803	0.999832	0.923268	0.740073	0.500831	0.296106	0.0826131	1	0.98416	0.958083	0.917002	0.879142	0.559444	0.27997	0.0890918	1	0.929718	0.908167	0.880719	0.772715	0.502547	0.254677	0.0902047	15.6554	-0.128106	0	0.990962	14.582	-0.105003	0	0.987038	15.4305	-0.127015	0	0.988786	14.6119	-0.110577
O15379-2	HDAC3		7									1	1.04216	1.0607	1.03272	0.676162	0.301903	0.129302	0.0255493									1	1.0836	1.09609	1.04929	0.673904	0.328918	0.132087	0.0363828					13.2707	-0.156583	0	0.992537					13.3697	-0.150668
O15379	HDAC3	7		1	1.05433	1.15114	1.09542	0.716485	0.388884	0.135754	0.0522851									1	0.976304	0.995204	1.06377	0.740694	0.354767	0.13501	0.0537359									13.8042	-0.146168	0	0.970337					13.7573	-0.1525	0	0.993972
O15381	NVL	2		1	0.927561	1.0648	0.892752	0.723245	0.175933	0.016263	0.0483913									1	1.02277	0.925761	1.21179	0.983859	0.217818	0.0252612	0									12.962	-0.230253	0.0102356	0.984829					14.1331	-0.397181	0.00813128	0.970988
O15382	BCAT2	15	19	1	0.968031	1.07965	1.07575	0.907248	0.901896	0.929758	0.70906	1	0.985125	1.06306	1.08006	0.814902	0.560637	0.582101	0.550502	1	0.987618	1.07605	1.10099	1.0028	0.715857	0.683473	0.642234	1	0.997647	1.07176	1.08065	0.81757	0.53456	0.508997	0.435879			0	0.716243		-1.14522	0.564413	0.970883		-0.174823	0.662309	0.931205	16.119	-0.132423
O15392-2	BIRC5		5									1	1.11287	1.06257	0.983249	0.740373	0.461833	0.204281	0.16861									1	0.977024	0.966138	1.00256	0.616036	0.321581	0.19731	0.109232					14.3083	-0.114643	0.033983	0.981547					13.0169	-0.142812
O15392	BIRC5	2		1	1.13562	1.11985	1.14162	0.616159	0.414994	0.591858	0.2463									1	0.952231	1.14765	0.769759	0.427806	0.37664	0.205366	0.139164									12.1178	-1.44497	0.417717	0.875155					11.6336	-0.11604	0.0939856	0.9636
O15397	IPO8	15	14	1	1.02804	1.02496	0.922708	0.51119	0.143303	0.0450269	0.0262599	1	0.996975	0.967534	0.870395	0.49287	0.142406	0.0346838	0.0239704	1	1.01081	0.995407	0.875747	0.455184	0.146033	0.0459602	0.0303926	1	0.98597	1.00074	0.929099	0.50536	0.149956	0.0355976	0.0213946	11.9993	-0.18805	0	0.998482	11.7608	-0.174708	0	0.996285	11.598	-0.172787	0	0.999054	11.991	-0.190056
O15400	STX7	9	13	1	1.00571	1.01041	1.02575	0.886535	0.941041	1.11296	0.920734	1	0.912735	0.859966	0.914596	0.713719	0.515772	0.507231	0.515784	1	1.00112	1.02139	1.01893	0.960975	0.795741	0.844851	0.79956	1	1.00316	1.01838	1.03903	0.810061	0.545702	0.518444	0.475617		-0.0125225	0.967654	0.0827173	19.3663	-0.0862561	0.47026	0.899963		-0.430811	0.813384	0.966754	18.1335	-0.133962
O15403	SLC16A6	2		1	1.14598	1.08711	1.048	0.683201	0.246066	0.163898	0.121249									1	1.06755	1.18703	1.17465	0.804579	0.349879	0.0966208	0.073179									12.9166	-0.211	0.128025	0.976657					13.9028	-0.182263	0.0315983	0.953708
O15417	TNRC18	3	4	1	0.922431	0.895316	0.827277	0.553643	0.365805	0.3148	0.275851	1	0.962697	0.981248	0.809117	0.47726	0.226841	0.177342	0.123738	1	0.98228	1.04029	0.972049	0.503345	0.359481	0.256446	0.221152	1	0.955279	0.930852	0.868237	0.571678	0.215898	0.157278	0.0962751	12.7926	-0.0890686	0.12708	0.97632	11.6187	-0.126365	0.0446515	0.997373	12.2058	-0.167557	0.2409	0.992754	12.2954	-0.131034
O15427	SLC16A3	8	12	1	0.971987	0.960726	0.829293	0.531415	0.168626	0.0298946	0.00571758	1	0.990652	0.886097	0.876126	0.54528	0.190531	0.0495819	0.016026	1	0.965889	1.01125	0.860898	0.567419	0.197416	0.0595173	0.0183896	1	0.980617	0.952966	0.888759	0.583556	0.203144	0.0705584	0.021871	11.8466	-0.162771	0	0.98876	12.1101	-0.164717	0	0.985813	12.2034	-0.160019	0	0.993184	12.3743	-0.163397
O15431	SLC31A1	1	1	1	0.979081	1.02476	0.898588	0.581888	0.284791	0.11442	0.0338405	1	1.08882	0.910739	1.09766	0.578671	0.2749	0.1356	0.0666465	1	1.03031	1.00279	0.993421	0.660726	0.269026	0.120401	0.0533101	1	0.978436	1.19255	0.860184	0.540243	0.337446	0.0790083	0.0341306	12.577	-0.139445	0	0.996737	12.6497	-0.183425	0.08154	0.973618	13.0497	-0.161647	0.0180918	0.998833	12.3644	-0.132492
O15438-4	ABCC3		4									1	0.97378	0.929131	0.909214	0.56333	0.211918	0.0478474	0.00228588									1	1.03387	1.0083	0.989392	0.598463	0.212265	0.0664396	0.00992747					12.3225	-0.170766	0	0.9927					12.5997	-0.182273
O15439	ABCC4	21	27	1	1.01083	0.994439	0.952643	0.570411	0.205663	0.0845528	0.0458326	1	1.00681	0.96254	0.873999	0.518858	0.173693	0.0474455	0.0198862	1	0.991946	0.948251	0.906017	0.444432	0.21013	0.0824094	0.0548159	1	1.02515	0.944531	0.882018	0.516319	0.180327	0.0494637	0.0224212	12.4239	-0.170008	0.00949993	0.999888	11.9416	-0.166752	0	0.996011	11.7207	-0.160801	0.0180196	0.997044	11.96	-0.16608
O15440	ABCC5	2		1	1.07699	1.11561	0.930438	0.504271	0.294551	0.211124	0.152101									1	1.02869	1.1069	0.869602	0.631236	0.253317	0.109953	0.0966858									12.1549	-0.151074	0.147761	0.982416					12.701	-0.136418	0	0.984894
O15446-2	CD3EAP	16	17	1	0.968244	0.931921	0.82832	0.464378	0.385864	0.388883	0.325746	1	0.969494	0.996792	0.825199	0.430633	0.222606	0.246982	0.251664	1	0.995996	0.968042	0.834977	0.444953	0.27905	0.262811	0.274654	1	0.97891	0.894795	0.810605	0.427539	0.217587	0.172223	0.195072	11.6021	-0.149186	0.346462	0.988394	11.1518	-0.167036	0.216833	0.99507	11.3384	-0.158212	0.244877	0.997785	11.2015	-0.148684
O15455	TLR3	1		1	1.03449	1.23359	0.958281	0.639998	0.381062	0.2374	0.10626									1	0.946314	1.11771	0.972957	0.637483	0.302953	0.150836	0.0401744									13.5333	-0.111832	0	0.952007					13.0797	-0.14199	0	0.985491
O15460	P4HA2	18	19	1	1.04955	1.06424	1.04311	0.717812	0.364346	0.159843	0.0463709	1	1.00017	1.01959	0.890321	0.630084	0.334616	0.138935	0.0354496	1	1.02954	1.00535	1.03357	0.750326	0.392661	0.165331	0.0786544	1	1.00221	0.920071	0.950657	0.695343	0.347793	0.144424	0.0511661	13.7223	-0.143543	0	0.99047	12.9755	-0.131073	0	0.99443	13.9893	-0.138327	0	0.996559	13.467	-0.138962
O15479	MAGEB2	13	21	1	0.973978	1.01075	0.89788	0.456824	0.217558	0.0838862	0.013941	1	1.06412	1.11753	1.05083	0.600287	0.255891	0.12744	0.0503367	1	0.921176	0.973358	0.799159	0.522064	0.20378	0.0813222	0.0215695	1	1.13677	1.11477	1.01619	0.557352	0.246202	0.108616	0.045104	11.7896	-0.157017	0	0.997722	12.7296	-0.176061	0.0505296	0.982176	11.7106	-0.141209	0	0.986225	12.5003	-0.172271
O15484	CAPN5	4	3	1	1.09128	0.988324	0.937907	0.520334	0.24707	0.209701	0.172124	1	1.04809	1.02971	0.952592	0.483174	0.197413	0.0938623	0.0471514	1	0.962734	0.934296	0.842216	0.581351	0.254658	0.170475	0.146215	1	0.956808	1.00297	0.859287	0.421328	0.177361	0.0558156	0.0366335	12.1126	-0.171221	0.163738	0.992071	11.9736	-0.177907	0.0350428	0.997054	12.3718	-0.115555	0.00978656	0.989703	11.4333	-0.162305
O15498	YKT6	17	23	1	0.981468	1.00481	1.01673	0.903369	0.877765	0.858932	0.30985	1	0.93441	0.996901	1.02489	0.811004	0.591204	0.60086	0.362482	1	1.02643	1.03504	1.04736	0.994658	0.805353	0.74531	0.368054	1	0.983149	1.04922	1.04608	0.832931	0.570583	0.543188	0.347631	19.9575	-0.20033	0	0.938114	18.0879	-0.0621103	0.170022	0.944935	19.8573	-0.088651	0	0.946618	17.0256	-0.0806256
O15504	NUPL2	2	1	1	0.937365	1.06359	1.04853	0.816521	0.710549	0.584792	0.16226	1	0.869326	1.24537	0.899362	0.578586	0.302837	0.0927584	0.0833845	1	0.922934	1.06068	0.951728	0.683726	0.578456	0.43357	0.229496	1	1.09446	1.20109	0.706395	0.585528	0.406536	0.122945	0	17.445	-0.0890255	0	0.918414	12.6152	-0.135051	0	0.93951	15.6195	-0.073115	0	0.9658	12.2148	-0.111821
O15511	ARPC5	11	13	1	0.949556	0.962871	0.967774	0.85541	0.811389	0.832243	0.573415	1	0.971306	1.0081	0.980784	0.784499	0.591649	0.615822	0.465191	1	0.97699	0.981775	0.988511	0.986833	0.725108	0.6718	0.49914	1	1.02425	1.01151	0.969322	0.883122	0.586143	0.512528	0.415519		-0.0307283	0	0.828597		-0.0717724	0.470091	0.972146		-0.0623581	0.405807	0.963869	17.1695	-0.096859
O15514	POLR2D	15	9	1	0.963068	1.02062	1.02304	0.850555	0.861046	0.976513	0.628112	1	0.913005	1.04422	0.976037	0.773947	0.590458	0.716877	0.643403	1	1.01626	1.07005	1.06689	0.955987	0.78536	0.776513	0.609864	1	1.03285	1.03799	1.0261	0.888661	0.59854	0.619823	0.571852			0	0.650516		-0.812965	0.650246	0.913982		-0.0407015	0.407328	0.912377		-0.221549
O15516	CLOCK	3	2	1	0.932173	0.986873	0.94019	0.606805	0.306387	0.226692	0.127716	1	0.838735	0.800148	0.730801	0.482593	0.247882	0.118492	0.0713738	1	1.05142	1.14384	1.16252	0.858229	0.307274	0.182303	0.121715	1	1.00967	1.01156	0.941445	0.70368	0.247967	0.147068	0.0966881	12.8952	-0.130173	0.0865572	0.993584	11.0828	-0.11552	0	0.927875	13.7968	-0.220123	0.132434	0.963653	13.0823	-0.183396
O15528	CYP27B1	1	2	1	1.15871	1.28308	1.20437	0.66037	0.342247	0.201273	0.0810909	1	0.99114	0.910594	1.06466	0.631199	0.26523	0.128182	0.0619761	1	0.986808	0.96278	0.778577	0.509664	0.193827	0.10907	0.117395	1	1.02898	1.1124	1.0155	0.562878	0.232407	0.140211	0.089488	13.3382	-0.161736	0.0964492	0.901956	12.8862	-0.177192	0.0571214	0.98641	11.5519	-0.12649	0	0.992353	12.4149	-0.193278
O15530	PDPK1	19	19	1	0.961006	0.990263	0.9499	0.568712	0.205401	0.0829081	0.0540345	1	0.973317	0.985144	0.953904	0.60848	0.18939	0.0595594	0.0310644	1	1.02731	1.04072	0.998854	0.619898	0.220152	0.0841628	0.0576121	1	0.978111	1.0133	0.976329	0.611483	0.197351	0.0610527	0.0260927	12.4053	-0.170965	0.0156704	0.998697	12.5697	-0.184908	0	0.999047	12.6888	-0.18701	0.0350865	0.997824	12.6163	-0.186224
O15533-3	TAPBP	5	6	1	1.01597	0.990055	1.01128	0.689654	0.487736	0.616873	0.291674	1	1.04305	1.02999	0.865525	0.601747	0.445501	0.355192	0.242284	1	1.02022	0.957534	0.846209	0.429191	0.502166	0.391865	0.246531	1	0.965188	0.834465	0.870019	0.678265	0.420117	0.334309	0.182789	15.5469	-0.0951931	0.388108	0.909536	13.7997	-0.082896	0.0878972	0.992978	11.9884	-0.128921	0.327394	0.954618	13.9592	-0.0843012
O15534	PER1	10	12	1	0.983954	1.03106	1.05743	0.685255	0.476744	0.314714	0.110709	1	1.01856	1.05317	1.07463	0.691446	0.393531	0.212173	0.100008	1	0.961964	1.0156	0.92855	0.705993	0.428055	0.232544	0.0920687	1	0.986806	1.05125	1.01674	0.741628	0.373869	0.188909	0.083846	14.4799	-0.103156	0	0.97861	13.8081	-0.130568	0.0414502	0.985983	13.9588	-0.112125	0	0.994943	13.8911	-0.136283
O15541	RNF113A	3		1	0.945529	1.08775	1.04828	0.84714	0.900704	1.02665	0.750994									1	1.02235	1.06769	1.07867	0.99472	0.717549	0.717584	0.612655										-0.0153303	0	0.36411						-0.126808	0.661446	0.931811
O15550	KDM6A	5	4	1	0.998542	1.16447	1.13026	0.744536	0.39029	0.194959	0.0797906	1	1.02359	1.00755	1.02597	0.683241	0.332955	0.206068	0.0861409	1	1.02485	0.960055	1.12748	0.614352	0.333347	0.144184	0.0854322	1	0.933929	1.07492	0.992328	0.736684	0.391878	0.188401	0.119418	13.9999	-0.142693	0.0325806	0.962014	13.4454	-0.141753	0.0565606	0.995042	13.0565	-0.161196	0.0741577	0.975302	13.9159	-0.131103
O15551	CLDN3	3		1	1.01114	1.08149	1.09282	0.952105	1.05024	1.16009	0.830799									1	1.007	1.08628	1.10446	1.06447	0.878776	0.909619	0.78734											1.05105	0.00809068						-0.026505	0.64032	0.652497
O15554	KCNN4	3	8	1	1.01388	1.0886	0.954366	0.548126	0.258699	0.0774668	0.00923614	1	0.973022	0.976349	0.832923	0.527574	0.210008	0.0840652	0.0191649	1	0.989902	1.03625	0.910587	0.533406	0.230273	0.0809908	0.0280301	1	1.01619	0.947273	0.908679	0.534812	0.230054	0.0907213	0.0396533	12.4309	-0.159422	0	0.991867	11.8986	-0.145573	0	0.993847	12.2164	-0.155006	0	0.998026	12.2197	-0.151073
O43143	DHX15	70	70	1	0.989937	0.990661	1.01785	0.862475	0.847748	0.836191	0.556884	1	1.01126	1.02343	0.971905	0.766593	0.57978	0.543049	0.442386	1	1.00727	0.997738	1.03875	0.902547	0.742388	0.648756	0.500755	1	0.986989	1.00076	0.986257	0.786426	0.543244	0.472865	0.378887		-0.040903	0	0.865168	18.2945	-0.0753712	0.414808	0.992435		-0.0526689	0.256112	0.98457	16.1498	-0.0893575
O43148-2	RNMT	15	23	1	0.980464	1.00853	0.993939	0.822634	0.584836	0.30136	0.0580548	1	0.967955	0.999808	1.03441	0.774376	0.483249	0.310495	0.0687884	1	1.00465	1.01793	1.05906	0.943991	0.582859	0.321935	0.0839805	1	1.02148	1.12415	1.01082	0.75894	0.441338	0.301874	0.091412	15.4264	-0.122347	0	0.987283	14.7861	-0.11441	0	0.985958	15.8319	-0.134215	0	0.991248	14.5225	-0.112098
O43149	ZZEF1	20	21	1	1.03716	1.01086	0.99425	0.59739	0.207117	0.101351	0.0638891	1	1.02692	1.01349	1.00461	0.596085	0.203681	0.0763008	0.0560805	1	0.970692	0.982989	0.992752	0.539239	0.21299	0.0960442	0.058868	1	1.00773	1.0111	1.03587	0.571393	0.184171	0.0754017	0.0515848	12.5449	-0.192828	0.0531368	0.998576	12.5412	-0.196279	0.0388604	0.998633	12.298	-0.185826	0.0491621	0.997877	12.3886	-0.218206
O43150	ASAP2	4	3	1	1.07435	1.08879	1.11557	0.771271	0.289038	0.0651186	0.0311319	1	1.00195	0.99109	1.02684	0.751592	0.320722	0.0713786	0.0165061	1	0.969852	1.06642	0.99259	0.758159	0.317428	0.0821726	0.0457692	1	0.825636	0.901394	0.847534	0.712219	0.347509	0.0921671	0.0222661	13.5584	-0.192108	0	0.981717	13.5713	-0.177033	0	0.997525	13.5963	-0.171126	0	0.995477	13.3759	-0.146799
O43156	TTI1	15	20	1	0.942812	1.01591	0.910934	0.533744	0.142849	0.0299162	0.019701	1	0.988373	0.958107	0.88077	0.523831	0.179974	0.0623073	0.0329115	1	0.994588	0.96458	0.91072	0.530238	0.153543	0.0449341	0.0201468	1	0.981674	0.995555	0.921714	0.56449	0.179995	0.0786108	0.0473999	12.091	-0.192311	0	0.995567	11.9943	-0.162295	0	0.996654	12.0787	-0.183524	0	0.997717	12.3055	-0.168752
O43157	PLXNB1	1	2	1	0.806947	0.912211	0.8802	0.55529	0.251643	0.0963553	0.0793718	1	0.940551	1.05498	1.02164	0.640386	0.313983	0.128807	0.0995191	1	0.894256	1.0491	0.948452	0.541911	0.281675	0.175935	0.124254	1	1.08979	1.04747	0.945515	0.637488	0.270219	0.100851	0.0482683	12.2916	-0.137186	0	0.954483	13.0788	-0.154702	0.0562345	0.991121	12.4024	-0.149921	0.101654	0.986582	12.9046	-0.153143
O43164	PJA2	9	6	1	0.92428	1.05066	1.06266	0.641392	0.491995	0.369319	0.201744	1	0.960954	1.09622	1.15705	0.673547	0.400212	0.272161	0.226101	1	1.03161	1.03802	1.08663	0.738549	0.484342	0.296636	0.229207	1	1.11519	1.15613	1.14496	0.790869	0.398499	0.250628	0.183067	14.3949	-0.0996384	0.154709	0.958811	13.3879	-0.162482	0.240566	0.957568	14.5216	-0.116745	0.175436	0.982035	14.0522	-0.157768
O43166	SIPA1L1	2	3	1	1.10989	1.01683	0.965097	0.57393	0.426103	0.374655	0.176414	1	0.977833	0.982468	0.858093	0.613029	0.283723	0.201864	0.125246	1	0.892123	1.00855	0.878725	0.609007	0.328424	0.183101	0.159542	1	1.03745	1.01447	1.00846	0.62757	0.313563	0.220561	0.161664	13.4956	-0.102849	0.161329	0.966663	12.735	-0.112371	0	0.995507	12.8902	-0.111921	0.0252257	0.985592	12.9256	-0.161542
O43167	ZBTB24	2	1	1	0.902359	0.903911	1.03329	0.543442	0.402714	0.306919	0.159028	1	0.995252	0.954738	0.7983	0.455608	0.152432	0.023186	0	1	1.00487	1.16119	1.10134	0.626284	0.239867	0.314486	0.174958	1	1.01266	1.08529	0.820006	0.439011	0.181243	0.0555479	0.0295142	12.8342	-0.141237	0.21087	0.950436	11.2903	-0.161325	0	0.991483	12.0588	-2.2324	0.243104	0.961585	11.3811	-0.155426
O43169	CYB5B	28	34	1	0.986685	1.00805	1.10174	0.890345	0.939591	0.943368	0.855381	1	1.01165	1.07111	1.16588	0.900281	0.602321	0.620816	0.670539	1	1.05213	1.09996	1.18239	0.922091	0.770162	0.803892	0.836359	1	0.986032	1.21089	1.07331	0.78733	0.542372	0.528147	0.56337		-0.04526	0.905894	0.592686		-0.922398	0.631225	0.89603		-0.483044	0.803471	0.691728		-0.876894
O43172-2	PRPF4	23	15	1	1.0063	1.01624	0.997982	0.784714	0.36639	0.0583956	0.0210634	1	0.943893	0.973079	1.00206	0.781806	0.434939	0.115807	0.0212561	1	0.99318	1.02996	1.00372	0.781064	0.414889	0.0941715	0.033001	1	1.10033	1.09974	1.02282	0.836566	0.443655	0.148996	0.0157949	13.8471	-0.176524	0	0.996458	14.1694	-0.155219	0	0.991354	14.0615	-0.159815	0	0.995083	14.4705	-0.161456
O43175	PHGDH	54	66	1	0.997009	0.997848	0.947653	0.602175	0.211377	0.0708091	0.0380385	1	0.984511	0.999966	0.911575	0.57684	0.241451	0.0884978	0.040838	1	0.990359	1.00636	0.918744	0.564122	0.235194	0.0756129	0.0296732	1	0.993706	0.933399	0.936254	0.615225	0.24676	0.0936821	0.0449235	12.5815	-0.17172	0	0.999758	12.4651	-0.151905	0	0.998855	12.3957	-0.1575	0	0.998859	12.718	-0.156171
O43181	NDUFS4	6	10	1	0.977859	1.04756	0.908073	0.631458	0.438399	0.551075	0.321968	1	0.987497	0.991271	0.957632	0.56572	0.254776	0.223203	0.271763	1	0.960649	0.981309	0.926356	0.60596	0.312954	0.334402	0.301741	1	1.01546	1.05986	0.963355	0.570324	0.235566	0.198263	0.242041	14.4136	-0.0980056	0.374972	0.951535	12.2902	-0.246228	0.239343	0.99677	12.7257	-0.151453	0.284426	0.991749	12.2882	-0.262091
O43187	IRAK2	2		1	1.28068	1.26554	1.34484	0.920957	0.698037	0.581384	0.144425									1	0.954324	0.791207	0.887893	0.724496	0.522877	0.45832	0.125548									17.5447	-0.106283	0	0.749682					15.0972	-0.0793235	0	0.878721
O43189	PHF1		1									1	1.29726	0.996316	0.962587	0.724113	0.378224	0.174714	0									1	0.816141	1.16167	1.18939	0.824178	0.361379	0.346602	0					13.739	-0.141675	0	0.934979					14.4871	-0.13532
O43237	DYNC1LI2	20	24	1	1.04104	1.05139	0.987296	0.689337	0.271145	0.0788073	0.0363148	1	0.999588	0.995913	1.01001	0.69522	0.28813	0.119982	0.0589293	1	0.973512	0.979391	0.973633	0.838367	0.271547	0.0881211	0.0408938	1	1.00713	1.11156	1.05053	0.769512	0.296403	0.116519	0.074472	13.1573	-0.170905	0	0.996633	13.2612	-0.163614	0.0220232	0.999199	13.689	-0.216657	0.030422	0.998638	13.5398	-0.185846
O43240	KLK10	1	1	1	1.20357	1.25746	1.11896	1.00136	1.34334	0.750975	0.484951	1	0.996344	1.27638	1.41152	0.810753	0.567389	0.421929	0.323474	1	0.938884	0.985606	1.36948	1.04219	0.678765	0.675209	0.466456	1	0.95506	1.257	1.38769	1.00182	0.50434	0.633411	0.279061	18.5903	-0.803461	0.484951	0.574755	15.6616	-0.114693	0.319193	0.764725		-0.154787	0.562207	0.700624	15.1329	-0.266177
O43242	PSMD3	52	53	1	0.97391	0.963887	0.944651	0.657734	0.185532	0.030978	0.0156773	1	1.01198	1.02616	0.973393	0.67111	0.261199	0.0515971	0.020434	1	1.00159	0.994068	0.979814	0.719432	0.243358	0.0511188	0.0193197	1	0.995296	1.02259	0.986128	0.690421	0.28015	0.0642216	0.0227878	12.7561	-0.205428	0	0.997082	13.0159	-0.177752	0	0.998225	13.1726	-0.193403	0	0.999601	13.1694	-0.173833
O43251-8	RBFOX2	6	9	1	1.02079	0.982751	0.990913	0.578989	0.275111	0.202504	0.165679	1	1.00002	0.978868	0.930155	0.54664	0.249503	0.171936	0.140173	1	0.990482	0.964264	0.890094	0.565156	0.286047	0.167873	0.134149	1	1.13658	1.04858	0.998402	0.638989	0.29211	0.169219	0.128577	12.5171	-0.181298	0.167138	0.998678	12.2992	-0.156331	0.110549	0.999493	12.4917	-0.125246	0.0444585	0.99847	12.9426	-0.163331
O43252	PAPSS1	38	42	1	0.96995	0.971477	1.01089	0.86558	0.823111	0.54908	0.0321255	1	1.03954	1.03325	0.953839	0.725666	0.567007	0.568266	0.142088	1	1.02905	1.00331	1.04248	0.959751	0.766388	0.583583	0.110146	1	1.03746	0.982384	0.9911	0.818736	0.56155	0.493557	0.175824	17.8641	-0.183378	0	0.945349	16.067	-0.0738706	0	0.919502	17.8306	-0.131893	0	0.960114	16.2131	-0.0838997
O43255	SIAH2	2	2	1	0.893674	0.909913	0.900733	0.676211	0.685617	0.639734	0.391746	1	0.992718	0.927952	0.852429	0.689897	0.513699	0.457228	0.514913	1	1.17	1.04492	0.991188	0.871583	0.630072	0.649016	0.466357	1	1.05721	1.30745	1.13338	0.980806	0.558313	0.47757	0.422921	20.4037	-0.0439034	0	0.854064	17.6821	-0.070015	0.397968	0.973776		-0.0605514	0.407098	0.898835	15.7773	-0.192253
O43257	ZNHIT1	3		1	0.964088	0.839061	0.802322	0.531145	0.198317	0.110938	0.0559578									1	1.05698	1.09835	1.06252	0.844265	0.230915	0.0814098	0.0670628									11.7285	-0.132472	0	0.969506					13.5109	-0.252106	0.0594662	0.988898
O43264	ZW10	27	30	1	1.02278	0.988453	0.913326	0.492028	0.113092	0.040218	0.0312134	1	1.01944	1.00269	0.944701	0.518477	0.145995	0.0864936	0.0377627	1	0.988753	1.0091	0.91475	0.464425	0.124411	0.0415978	0.0247993	1	1.00491	0.979241	0.893793	0.469712	0.150174	0.0519436	0.0353195	11.8621	-0.195838	0	0.998284	12.0659	-0.193947	0.0250362	0.999236	11.7407	-0.19165	0	0.99948	11.7276	-0.173913
O43272	PRODH	1		1	1.03016	0.982664	0.883557	0.374736	0.0525158	0.0634409	0.039669									1	1.03615	1.03764	0.949814	0.547358	0.0931457	0	0									11.1913	-0.210707	0.0131426	0.996833					12.1731	-0.253348	0	0.997274
O43278	SPINT1	20	28	1	1.01198	1.02228	1.05792	0.949723	0.99318	1.11308	0.946531	1	1.00207	1.01068	1.06509	0.872968	0.654976	0.711385	0.716919	1	1.00435	1.00217	1.05455	0.987846	0.80419	0.853811	0.802386	1	0.990722	1.07799	1.05051	0.892386	0.607106	0.616482	0.611061			1.01379	0.00772338		-0.74983	0.694427	0.964021		-0.462471	0.820129	0.934509		-1.10238
O43286	B4GALT5	2	3	1	1.07526	0.935582	0.927279	0.681097	0.25262	0.0656376	0.0147449	1	1.03908	0.905791	0.983552	0.67538	0.267003	0.121702	0.048412	1	0.972759	0.998024	0.95234	0.676998	0.287149	0.104082	0.024588	1	1.09964	1.14053	1.00491	0.674502	0.287214	0.135964	0.0498738	13.0192	-0.175164	0	0.990098	13.11	-0.161629	0.0120123	0.991349	13.1423	-0.158391	0	0.998377	13.1969	-0.156019
O43290	SART1	21	24	1	0.908987	0.891516	0.730888	0.297216	0.124532	0.0918273	0.0539795	1	0.991888	0.933743	0.745755	0.312029	0.110273	0.073063	0.052284	1	0.952596	0.852836	0.66351	0.278131	0.110313	0.0742657	0.0430164	1	0.997016	0.88425	0.691831	0.29109	0.116132	0.0664927	0.0465	10.3579	-0.162181	0.0110869	0.984321	10.4716	-0.168315	0.00734036	0.99698	9.90207	-0.155597	0	0.984872	10.1369	-0.159614
O43291	SPINT2	10	7	1	0.998804	1.03988	1.00336	0.850566	0.807211	0.858193	0.638549	1	0.966448	1.02398	0.992065	0.71368	0.566669	0.589089	0.524632	1	1.01443	1.06234	1.05896	0.839844	0.697036	0.668013	0.550356	1	0.941619	1.00969	1.03518	0.805621	0.524443	0.519771	0.490009		-0.0256227	0	0.847813		-0.133198	0.552305	0.989138		-0.0618229	0.552372	0.951263		-0.180658
O43292	GPAA1	9	8	1	1.11582	1.10947	0.983866	0.59613	0.187683	0.0789234	0.0612612	1	1.08088	1.05109	0.980465	0.604881	0.194854	0.0654515	0.0470088	1	1.02604	0.987569	0.972244	0.528729	0.192512	0.0872279	0.0567797	1	0.977179	1.00404	0.947579	0.482712	0.181781	0.0723462	0.0346058	12.4944	-0.202243	0.0442096	0.983579	12.5647	-0.192716	0.0214194	0.993762	12.1985	-0.187798	0.0415088	0.999122	11.953	-0.179285
O43293	DAPK3	10	3	1	0.959096	0.838916	0.62614	0.197656	0.0663661	0.0483554	0.0264892	1	1.02686	0.907549	0.615791	0.200384	0.0514998	0.0375278	0.0301972	1	0.957321	0.864612	0.589954	0.163269	0.0663766	0.0420079	0.0258279	1	0.967372	0.90909	0.578959	0.156363	0.0551455	0.0360414	0.0186864	9.53294	-0.181859	0	0.982515	9.55586	-0.193591	0	0.994935	9.32222	-0.190081	0	0.988277	9.32329	-0.204529
O43294	TGFB1I1	2	1	1	1.01185	0.923953	0.914901	0.647885	0.360364	0.388968	0.289609	1	0.998244	0.898681	0.950161	0.632157	0.494634	0.365502	0.303631	1	1.03734	1.08044	0.925523	0.64247	0.465829	0.272355	0.236837	1	1.03795	1.11686	1.15203	0.774492	0.507391	0.303375	0.307462	13.3925	-0.116154	0.276409	0.981462	14.3237	-0.0902674	0.227811	0.977856	13.9609	-0.0942341	0.0928789	0.987293	14.6703	-0.127589
O43295	SRGAP3	1		1	0.989358	0.910274	0.873814	0.362753	0.130611	0.0414626	0.055371									1	1.10799	1.1223	1.00498	0.480848	0.103364	0.0630601	0.0625147									11.148	-0.190931	0.0205846	0.993575					11.9388	-0.30837	0.0621343	0.984132
O43296	ZNF264	2	2	1	1.09808	1.15891	1.1494	0.696034	0.297189	0.177988	0.134505	1	0.98294	1.01	0.967363	0.533645	0.259787	0.110105	0.0878717	1	0.91435	0.833943	0.875716	0.663658	0.251206	0.133233	0.0973603	1	0.983053	1.06852	0.971853	0.490986	0.231706	0.101356	0.0513241	13.1444	-0.193301	0.140699	0.957021	12.3468	-0.160838	0.0550984	0.998041	12.8905	-0.135378	0	0.956365	12.0976	-0.17208
O43298	ZBTB43		1									1	0.932922	0.981024	0.882486	0.620407	0.418875	0.2421	0.0859538									1	1.00322	0.922442	0.92552	0.669575	0.351788	0.258498	0.0970411					13.3565	-0.103377	0	0.986619					13.5168	-0.110579
O43299	AP5Z1	4	2	1	1.51117	0.91518	0.944622	0.620789	0.217616	0.0615546	0.0415599	1	0.936776	0.953229	1.01575	0.579177	0.16015	0.0371827	0.0206501	1	1.08154	1.23124	1.08717	0.784288	0.283847	0.0925511	0.044052	1	0.937419	1.00358	1.01778	0.552109	0.147838	0.04832	0.0109647	12.6741	-0.173593	0	0.859993	12.4087	-0.216511	0.00825429	0.994561	13.5708	-0.195145	0.0241401	0.958258	12.2799	-0.222012
O43301	HSPA12A	18	18	1	1.06515	1.02841	1.02019	0.747415	0.420728	0.242361	0.0959965	1	0.979981	0.95667	0.960281	0.631364	0.336893	0.196179	0.0706415	1	1.02599	1.0332	0.993329	0.7184	0.409966	0.222658	0.0921643	1	0.992047	0.974705	0.960713	0.664667	0.33122	0.18562	0.0798868	14.2525	-0.120115	0	0.991993	13.2148	-0.124455	0	0.99596	14.0108	-0.120028	0	0.996557	13.349	-0.127901
O43303	CCP110	3	1	1	1.03943	0.992191	0.972895	0.522602	0.186131	0.0924287	0.0765648	1	0.954938	1.01612	0.852029	0.423108	0.103488	0.0394717	0.00803092	1	1.04384	1.03417	1.01717	0.530018	0.193042	0.109474	0.0681185	1	1.09759	1.01142	0.85838	0.521932	0.124126	0.0381724	0.0353771	12.1421	-0.198518	0.0629487	0.99867	11.3283	-0.182842	0	0.996281	12.2011	-0.215775	0.0791429	0.99596	11.8573	-0.175686
O43306	ADCY6		1									1	1.09584	0.965751	0.929078	0.599762	0.139703	0.0509516	0.0378985									1	0.986114	0.941674	0.963044	0.484281	0.147295	0.0435252	0					12.4233	-0.210634	0.0120161	0.990932					11.9511	-0.200753
O43310-2	CTIF	5	9	1	1.01623	0.962835	1.00139	0.801425	0.651679	0.243884	0.0865078	1	1.01728	1.045	1.02514	0.737204	0.491517	0.266752	0.042517	1	0.995482	1.07154	1.01579	0.72755	0.585237	0.282844	0.0882707	1	0.974819	1.02131	1.02192	0.7641	0.46485	0.24267	0.0445357	15.6058	-0.127897	0	0.978221	14.5216	-0.1187	0	0.984045	15.0177	-0.10725	0	0.973555	14.4629	-0.126032
O43313	ATMIN		1									1	1.00218	1.07907	0.678247	0.303088	0.227215	0.148519	0.155653									1	1.37384	0.504977	1.12233	0.595746	0.346839	0.138862	0.0653056					10.0946	-0.181797	0.147674	0.992382					13.0862	-0.151016
O43314	PPIP5K2	18	23	1	0.945071	0.98142	0.89387	0.515049	0.181367	0.0625127	0.0458581	1	0.98605	0.992612	0.933783	0.546164	0.197588	0.0794101	0.0500586	1	0.966503	0.97953	0.938273	0.552696	0.190818	0.0856808	0.0469867	1	1.01504	0.992136	0.985963	0.568869	0.206496	0.0760179	0.0391452	11.9894	-0.162833	0	0.996419	12.2643	-0.16578	0.00469104	0.999708	12.29	-0.16993	0.00985307	0.998684	12.4433	-0.181235
O43318	MAP3K7	16	13	1	0.99423	1.04228	1.0543	0.769881	0.327642	0.101063	0.0391756	1	0.942596	0.987806	1.00949	0.712814	0.382912	0.155345	0.0622817	1	1.0114	1.00651	1.04227	0.782779	0.356078	0.106235	0.0383273	1	1.00115	1.04466	1.00028	0.747464	0.343111	0.154294	0.0723597	13.7159	-0.170897	0	0.995444	13.7486	-0.137377	0	0.994532	13.8708	-0.166653	0	0.997367	13.7211	-0.149391
O43324	EEF1E1	15	22	1	1.02251	0.988443	0.870636	0.487256	0.195599	0.0472234	0.0154693	1	1.02703	1.01472	0.924953	0.532259	0.211006	0.0894908	0.0274719	1	1.0243	1.01439	0.92483	0.550212	0.210581	0.0683862	0.0181555	1	1.02293	1.01993	0.968391	0.556558	0.217173	0.0866029	0.024868	11.7997	-0.161411	0	0.997211	12.2105	-0.159911	0	0.999009	12.2895	-0.166446	0	0.998649	12.4125	-0.167659
O43325	LYRM1	3	3	1	0.98808	1.01147	1.06386	0.805826	0.699492	0.66991	0.423669	1	1.05549	0.962131	1.03353	0.765467	0.687104	0.665897	0.555098	1	1.02366	1.08512	1.11626	1.03966	0.629394	0.58032	0.412036	1	0.92615	1.09735	1.09572	0.846289	0.522618	0.567623	0.520667	20.1578	-0.0504189	0	0.932126		-0.0820231	0.608486	0.945918	17.5038	-0.197108	0.490233	0.93027		-1.16643
O43347	MSI1	11	8	1	1.04655	1.02956	0.96654	0.645168	0.304918	0.185035	0.101442	1	1.04687	1.12964	1.06452	0.659586	0.295603	0.155653	0.0868812	1	1.02378	1.04301	0.942604	0.635233	0.31314	0.184522	0.100357	1	1.04398	1.07307	0.974389	0.607077	0.267981	0.144054	0.0906812	13.0969	-0.140271	0.0576286	0.996867	13.1039	-0.168055	0.0774715	0.979941	13.0901	-0.128941	0.0267169	0.997574	12.7529	-0.157591
O43353	RIPK2	10	12	1	0.942951	1.05437	1.02843	0.750292	0.662502	0.587966	0.271435	1	0.972091	1.0395	1.04092	0.73146	0.526849	0.471166	0.275722	1	1.03086	1.05908	1.00675	0.783586	0.601176	0.469602	0.239669	1	0.965785	0.984315	0.999127	0.775986	0.507025	0.408918	0.246916	17.5925	-0.0646838	0	0.927798	15.6342	-0.0849286	0.20977	0.970853	16.4454	-0.0767345	0	0.979759	15.4132	-0.0891892
O43379-4	WDR62	10	10	1	1.06592	1.06318	1.03879	0.614298	0.212248	0.109303	0.0421064	1	1.00484	0.989625	0.88143	0.559711	0.211128	0.0708645	0.0311861	1	1.0521	1.01693	0.940604	0.557378	0.246795	0.0925258	0.0429306	1	1.03763	1.00698	0.974396	0.582105	0.196013	0.0596121	0.0250935	12.6547	-0.19689	0.0475762	0.991357	12.2377	-0.156367	0	0.997168	12.441	-0.153013	0	0.997377	12.4808	-0.183275
O43390-2	HNRNPR	46		1	1.00623	1.0379	1.02503	0.728074	0.452225	0.179965	0.0373021									1	1.02726	1.05296	1.0192	0.744021	0.424518	0.1842	0.0478059									14.1261	-0.132729	0	0.990316					14.0925	-0.13474	0	0.992874
O43390	HNRNPR		64									1	1.03318	1.04367	0.999958	0.663441	0.305491	0.0891099	0.0231642									1	1.06617	1.07851	0.994616	0.664179	0.312525	0.102748	0.0310386					13.1566	-0.160098	0	0.99567					13.1946	-0.154773
O43395	PRPF3	25	23	1	0.984232	0.936249	0.788345	0.313472	0.0667206	0.0484351	0.0336718	1	0.933816	0.987518	0.926225	0.476447	0.159381	0.0872551	0.0499317	1	0.986777	0.93185	0.77925	0.343268	0.0885737	0.047137	0.0314192	1	1.01149	0.962474	0.91877	0.501246	0.167628	0.0936217	0.0540627	10.6137	-0.188853	0	0.996065	11.8402	-0.181432	0.0280404	0.996412	10.694	-0.176368	0	0.995656	11.9561	-0.172105
O43396	TXNL1	36	38	1	0.988864	1.0008	1.00067	0.820104	0.79937	0.788525	0.263755	1	0.984782	1.0004	0.972501	0.759869	0.558925	0.60812	0.3695	1	1.01321	1.03937	0.982603	0.848788	0.71212	0.632794	0.321109	1	0.962743	0.996782	0.987118	0.791932	0.535586	0.527109	0.343057	19.4944	-0.160617	0	0.846161	17.939	-0.0601902	0.226959	0.952603	18.6875	-0.0645041	0	0.957435	16.5641	-0.0778067
O43399-7	TPD52L2	30	25	1	0.969425	1.03056	1.01367	0.87393	0.920042	0.931542	0.689296	1	0.949099	0.933269	0.939176	0.779659	0.615152	0.633242	0.531904	1	0.984082	0.999255	1.00799	0.984677	0.754992	0.706293	0.583936	1	0.969438	1.01954	1.01337	0.883068	0.623221	0.587979	0.489151			0	0.730601		-0.0568767	0.489286	0.954372		-0.0655859	0.584337	0.97366		-0.0904243
O43402	EMC8	11	12	1	0.970017	0.962847	0.857195	0.501785	0.151011	0.04335	0.0172234	1	1.00822	1.07653	1.00218	0.589961	0.214826	0.0684899	0.0306318	1	0.953248	0.947519	0.898533	0.562214	0.167567	0.0519347	0.0277481	1	1.00171	1.02267	1.00109	0.56529	0.222253	0.0677824	0.026472	11.7686	-0.168465	0	0.994343	12.5754	-0.181412	0.0061549	0.994928	12.231	-0.176488	0	0.993494	12.4891	-0.175414
O43405	COCH		1									1	0.898128	0.968928	0.940238	0.720174	0.38045	0.213382	0.157832									1	1.15633	1.00128	0.860816	0.670347	0.191697	0.174855	0.143355					13.7807	-0.121898	0.0653508	0.986219					12.6874	-0.239954
O43414	ERI3	17	14	1	0.946752	1.02679	1.04067	0.85	0.745414	0.602061	0.284958	1	0.921099	0.964546	1.01822	0.757625	0.615529	0.573462	0.399453	1	1.0212	1.02536	1.09046	1.02129	0.698594	0.569011	0.362577	1	1.00538	1.05399	1.07363	0.91294	0.586401	0.548052	0.398617	18.3336	-0.0761444	0	0.952982	18.2885	-0.0630145	0.291123	0.948529	18.2411	-0.0902504	0.27712	0.959567	17.1975	-0.107912
O43422	PRKRIR	5	7	1	1.03637	0.989509	0.984063	0.653747	0.203368	0.0542691	0.0343655	1	1.02163	1.14028	1.01886	0.707268	0.301545	0.133188	0.0782541	1	1.00062	0.974714	0.890292	0.694975	0.20903	0.0673635	0.0467386	1	1.00569	0.978716	1.03848	0.712931	0.26745	0.111783	0.0736742	12.8037	-0.194763	0.00547301	0.998896	13.3432	-0.164051	0.0447274	0.984034	12.9597	-0.184543	0.00351331	0.99225	13.212	-0.185861
O43426	SYNJ1	9	13	1	0.971527	1.0104	1.03601	0.847858	0.477084	0.113104	0.0597994	1	0.990378	0.94706	0.993172	0.75554	0.511279	0.340201	0.251117	1	0.975319	0.969576	1.03104	0.902031	0.518652	0.116737	0.055642	1	0.973384	1.07817	1.03787	0.810196	0.498693	0.32411	0.245036	14.6283	-0.164273	0	0.994772	15.0474	-0.0950005	0.128908	0.994352	14.9912	-0.182988	0	0.995868	14.9504	-0.116692
O43427	FIBP	8	13	1	0.959835	0.967257	0.935119	0.471328	0.165446	0.0733931	0.0437866	1	1.01039	0.989863	0.91078	0.465549	0.124883	0.0375021	0.0231833	1	1.01971	0.953465	0.912696	0.486161	0.159483	0.0640649	0.0513847	1	0.99774	0.978064	0.902392	0.441544	0.130842	0.0512422	0.0317983	11.8462	-0.183123	0.0216155	0.997956	11.7362	-0.191299	0	0.999332	11.8634	-0.17392	0.00759279	0.997824	11.6031	-0.183217
O43432-3	EIF4G3	19	26	1	0.960301	0.96869	0.9445	0.691999	0.307914	0.0812667	0.0313863	1	0.967339	1.00576	0.968299	0.608889	0.271538	0.114824	0.0648175	1	0.973117	0.988536	0.93956	0.723295	0.33507	0.102037	0.0357312	1	1.00084	1.02551	0.958687	0.602312	0.266967	0.125855	0.0580099	13.2471	-0.159671	0	0.995612	12.8027	-0.150571	0.0112517	0.998788	13.4946	-0.154795	0	0.996735	12.7645	-0.146806
O43439-4	CBFA2T2	2		1	1.10548	1.09484	1.09407	0.946163	0.894281	0.554176	0.259399									1	1.05044	1.14786	1.35703	1.27562	0.717651	0.518094	0.301562									18.4753	-0.124682	0	0.952246					17.3554	-0.134243	0.305318	0.74866
O43447	PPIH	20	31	1	0.974802	1.03551	0.998724	0.867395	0.77882	0.786848	0.602752	1	0.967478	0.997366	1.00831	0.775655	0.5633	0.525571	0.469278	1	0.926092	0.990075	1.00075	0.853578	0.642915	0.613731	0.547187	1	0.987178	1.10216	1.05311	0.855197	0.526639	0.472272	0.422632		-0.0313813	0	0.930458	18.532	-0.104629	0.478708	0.993798		-0.0825455	0.554038	0.97286	15.6202	-0.137237
O43462	MBTPS2	3		1	0.960178	0.979629	0.935527	0.568129	0.222499	0.115379	0.0453642									1	0.994375	1.07949	0.977071	0.639611	0.257872	0.122278	0.0758016									12.4452	-0.153036	0	0.99812					12.8823	-0.164938	0.0430667	0.995039
O43464	HTRA2	7	9	1	0.985362	1.06992	1.0564	0.860289	0.758055	0.718138	0.59213	1	0.994855	0.915165	1.00229	0.707297	0.472143	0.399491	0.344725	1	1.00655	0.99808	1.034	0.884149	0.563704	0.498232	0.448245	1	1.04579	1.06404	1.00956	0.7298	0.458619	0.339701	0.31426		-0.0443306	0.520638	0.932744	14.3381	-0.119339	0.342074	0.985046	16.7078	-0.125972	0.456674	0.995769	14.2214	-0.124934
O43474	KLF4	2	1	1	0.918593	0.974879	0.977926	0.75122	0.666925	0.276561	0.202497	1	0.935635	1.1388	1.05962	0.696448	0.537075	0.349263	0.396036	1	1.18891	1.21514	1.07654	1.02126	0.484315	0.416254	0.277326	1	0.987837	1.05815	0.984624	0.614677	0.403688	0.328491	0.229299	15.6785	-0.0943103	0	0.959192	14.5698	-0.119069	0.364746	0.94425	14.9327	-0.301483	0.344106	0.902148	13.3112	-0.125519
O43482	OIP5	3	3	1	0.972473	0.929988	1.03793	0.763836	0.655962	0.625286	0.348772	1	0.941404	1.10309	1.06274	0.799068	0.500529	0.411097	0.31013	1	1.06016	1.04253	0.990902	0.683539	0.66331	0.504132	0.300146	1	1.04411	1.12593	1.09463	0.826263	0.527825	0.417738	0.289822	18.5729	-0.0559153	0	0.920678	15.0669	-0.116012	0.306485	0.968926	16.9926	-0.0623729	0	0.951508	15.4917	-0.108704
O43488	AKR7A2	19	19	1	1.02498	1.06931	1.11109	0.812318	0.574451	0.302874	0.0619157	1	0.959774	0.993846	0.893867	0.639637	0.508296	0.376512	0.0740386	1	1.00457	0.994665	0.98285	0.7557	0.607771	0.326718	0.0861607	1	1.01212	0.876529	0.915081	0.747185	0.519309	0.339774	0.0960211	15.3849	-0.12247	0	0.971202	14.2006	-0.0888642	0	0.960287	15.3625	-0.104892	0	0.976909	14.8256	-0.0979911
O43490	PROM1	8	10	1	0.940934	0.931269	0.979979	0.84076	0.765767	0.769983	0.606846	1	1.02135	1.08867	1.10345	0.783883	0.633908	0.669553	0.612933	1	0.979727	1.02691	1.00434	0.854237	0.646877	0.566005	0.568448	1	0.992529	1.03517	1.08992	0.81214	0.581227	0.550666	0.501727		-0.0287708	0	0.883919		-0.877487	0.638798	0.933628		-0.0900837	0.552187	0.995045		-0.125296
O43491-4	EPB41L2	2		1	0.994309	0.967164	1.15996	0.766013	0.525258	0.316795	0.136505									1	1.02934	1.00415	1.05857	0.656757	0.425312	0.192195	0.118245									15.1591	-0.107305	0	0.960032					13.7872	-0.121662	0.02348	0.98615
O43491	EPB41L2	51	45	1	0.978035	1.01099	1.01898	0.811226	0.562166	0.291917	0.0916499	1	0.986318	1.01003	1.02875	0.746524	0.441335	0.245228	0.0933092	1	0.999457	1.02142	1.04386	0.903765	0.506854	0.27956	0.112931	1	0.993213	1.08232	1.04063	0.793312	0.415551	0.229462	0.100787	15.2836	-0.116629	0	0.991713	14.3469	-0.118966	0	0.994859	15.2301	-0.13533	0.0422667	0.995013	14.3379	-0.133691
O43493	TGOLN2	7	3	1	0.831223	1.01112	1.01139	0.815634	0.783419	0.94161	0.728812	1	1.00519	0.90543	0.750286	0.678258	0.588399	0.580535	0.575961	1	0.950732	0.982189	1.00881	0.849822	0.722942	0.686695	0.620347	1	0.938893	0.881408	0.885244	0.914167	0.639871	0.579558	0.566386		-0.268114	0.817376	0.412415		-0.0561148	0.464086	0.995787		-0.0556561	0.613779	0.973869		-0.0384756
O43497	CACNA1G		1									1	1.01508	1.08657	1.22113	0.666003	0.243534	0.0775046	0.0153108									1	0.939284	0.94711	0.945828	0.607475	0.215202	0.0528833	0.0812941					13.0102	-0.20034	0.0175538	0.96158					12.584	-0.178635
O43502	RAD51C	10	10	1	1.02449	1.03355	0.968745	0.657669	0.253982	0.0693258	0.0403778	1	1.03401	1.03865	1.0333	0.658019	0.320296	0.13817	0.0732009	1	1.02886	1.00265	0.98912	0.642832	0.280215	0.097835	0.0298135	1	1.05049	0.98819	0.991376	0.701861	0.310624	0.143276	0.0866061	12.9535	-0.170242	0	0.998362	13.2398	-0.149989	0.0278093	0.994069	12.9939	-0.159382	0	0.998374	13.3598	-0.154584
O43504	LAMTOR5	3	3	1	1.13835	1.31113	1.51296	1.19231	0.95794	1.15313	0.826595	1	1.09929	1.29934	1.37662	0.963109	0.656513	0.579262	0.613478	1	1.18262	1.32566	1.20836	0.846935	0.791216	0.666197	0.550113	1	0.986147	1.11105	1.17476	0.878112	0.578094	0.460896	0.440659		0	8.0813e-08	-0.369685		-0.139096	0.595164	0.636436		-0.0517241	0.42846	0.642972	16.397	-0.122575
O43505	B3GNT1	3	3	1	1.05755	1.13667	1.06677	0.862964	0.769377	0.749106	0.58125	1	1.09285	1.0574	1.16747	0.776283	0.657528	0.554432	0.453865	1	0.924214	0.979384	0.997538	0.782879	0.595055	0.546442	0.451054	1	0.924127	1.09789	1.05036	0.724884	0.510896	0.409319	0.315189		-0.0390981	0.362676	0.860041	19.8719	-0.0808511	0.455795	0.898548	18.7535	-0.0783155	0.434047	0.975101	14.8923	-0.105966
O43513	MED7	5	2	1	0.960758	0.961085	0.951851	0.655295	0.416003	0.253838	0.11161	1	1.10072	0.967656	0.979756	0.607137	0.38509	0.253237	0.17073	1	1.00316	1.02955	0.918815	0.714548	0.388373	0.215866	0.101613	1	0.919711	1.14952	1.00075	0.543788	0.230528	0.163088	0.121472	13.7568	-0.105923	0	0.993519	13.2468	-0.121268	0.128942	0.984912	13.8051	-0.116121	0	0.997169	12.2749	-0.20335
O43524	FOXO3	3	8	1	1.06661	1.07676	1.12704	0.842747	0.657247	0.516196	0.328335	1	0.980577	0.958175	0.942697	0.714472	0.393158	0.272807	0.188137	1	0.987053	1.06717	1.01249	0.825127	0.519937	0.331047	0.253296	1	0.94417	1.09453	1.013	0.794012	0.411487	0.252156	0.179429	17.5744	-0.0747408	0.103351	0.944399	13.9044	-0.112991	0.105799	0.996532	15.194	-0.111429	0.181727	0.993061	14.2003	-0.141426
O43542	XRCC3	7	7	1	1.03037	0.974276	0.925118	0.536657	0.154591	0.0767374	0.0484286	1	1.02555	1.09712	1.06614	0.587763	0.253645	0.101867	0.0599515	1	0.952262	1.00126	0.955346	0.481704	0.215578	0.068573	0.0340776	1	0.930055	0.958109	0.913448	0.549048	0.248617	0.092706	0.062714	12.1315	-0.181308	0.0140078	0.99796	12.6441	-0.184584	0.0550998	0.985721	12.0245	-0.169152	0.00674388	0.996479	12.346	-0.145465
O43543	XRCC2	3	1	1	0.955687	1.01678	0.938474	0.714396	0.277588	0.110128	0.047993	1	1.17702	1.17131	1.04777	0.710403	0.297422	0.112522	0.0761532	1	0.969684	0.992135	1.13599	0.688747	0.285749	0.129984	0.0532934	1	1.02408	1.1106	0.967831	0.566518	0.21403	0.0983177	0.0468062	13.2879	-0.16067	0	0.996694	13.329	-0.171988	0.0428979	0.958302	13.2274	-0.178508	0.0477473	0.98141	12.4354	-0.171794
O43556	SGCE	3		1	1.03193	1.03651	1.15236	0.803451	0.795786	0.45637	0.103076									1	1.09222	1.07638	1.26868	0.981315	0.718656	0.530252	0.119598									17.2246	-0.132672	0	0.927623					17.3968	-0.121988	0	0.890441
O43567	RNF13	5	3	1	0.869061	0.72712	0.673679	0.48837	0.466437	0.502519	0.416478	1	0.980353	0.829225	0.882671	0.562423	0.376365	0.293038	0.271068	1	0.886223	0.782287	0.668165	0.574371	0.415475	0.415992	0.397935	1	0.868149	0.94279	0.790632	0.528151	0.314614	0.265236	0.202028	14.4596	-0.0788671	0	0.955377	12.8358	-0.104761	0.192039	0.957704	13.2987	-0.0702359	0	0.959892	12.2108	-0.0955363
O43570	CA12	1	1	1	0.834348	0.872097	1.04347	1.16501	0.454984	0.409596	0.374539	1	1.39516	1.42567	1.38869	1.01495	0.565082	0.500606	0.450394	1	0.847072	0.743712	0.763683	0.307574	0.450056	0.561899	0.279961	1	1.31281	1.41927	1.32858	0.92523	0.561488	0.457159	0.319976	14.8886	-0.892021	0.392067	0.892465	15.6044	-0.352563	0.475331	0.598714	12.0557	-0.0778961	0	0.759305	15.8966	-0.130476
O43572	AKAP10	3	5	1	0.966915	0.984887	0.887958	0.434049	0.130731	0.0431549	0.0356917	1	1.05409	0.992554	0.885123	0.431698	0.13503	0.0279312	0.0146021	1	1.01503	0.996106	0.836283	0.486477	0.129155	0.0615279	0.0357909	1	1.001	0.940892	0.835618	0.453243	0.123406	0.04802	0.0239664	11.524	-0.180783	0	0.998645	11.5106	-0.184478	0	0.997207	11.5816	-0.162892	0	0.995422	11.409	-0.168278
O43581-2	SYT7		3									1	1.03008	1.0118	0.927903	0.568843	0.25158	0.183658	0.062552									1	0.930347	1.02717	0.874334	0.58076	0.288794	0.1429	0.0730117					12.536	-0.137652	0.0222287	0.996761					12.5475	-0.126873
O43583	DENR	13	14	1	1.02235	1.05301	1.0705	0.863015	0.883082	0.961239	0.769668	1	0.977481	0.99916	0.980268	0.727697	0.555983	0.617232	0.593569	1	1.02798	1.04311	1.05367	0.947822	0.721438	0.669425	0.620912	1	0.982028	1.01347	1.02894	0.797186	0.527171	0.512311	0.468149		-0.0157504	0	0.591902		-0.971615	0.588928	0.990127		-0.0851882	0.631222	0.973373	16.6286	-0.147658
O43592	XPOT	21	26	1	1.03649	1.03543	1.0031	0.550325	0.179183	0.0588626	0.0416239	1	0.998326	0.997285	0.914774	0.554296	0.214692	0.0727898	0.032953	1	1.00569	1.05039	0.966979	0.473146	0.185778	0.0651917	0.0305	1	1.03316	1.02373	0.972932	0.575511	0.217877	0.0807887	0.0385882	12.3013	-0.205118	0.0290299	0.99735	12.2977	-0.16083	0	0.999251	11.9413	-0.187671	0.0199307	0.997039	12.4995	-0.170734
O43598	DNPH1	12	14	1	0.895106	0.968597	0.996004	0.753736	0.665778	0.582392	0.234389	1	0.991803	1.02913	0.949233	0.688635	0.509161	0.49751	0.273368	1	1.00295	1.03275	1.02251	0.848496	0.663574	0.494603	0.312364	1	0.941252	0.952173	0.996801	0.728618	0.500518	0.393185	0.253384	17.325	-0.0675419	0	0.906354	15.6977	-0.0697557	0.0776036	0.974075	17.4688	-0.0728287	0	0.991939	15.0858	-0.0890084
O43615	TIMM44	30	34	1	0.983436	0.980067	0.973593	0.649039	0.182124	0.0409561	0.0243621	1	0.966299	0.9611	0.981395	0.664515	0.257507	0.0959855	0.0656614	1	1.0043	1.00875	0.981149	0.718139	0.214503	0.0703689	0.0245713	1	0.991722	1.02336	1.00852	0.688678	0.273764	0.103072	0.0620864	12.731	-0.204398	0	0.99935	12.9947	-0.170431	0.0257585	0.997715	13.0927	-0.20166	0.00780272	0.999827	13.163	-0.171206
O43617	TRAPPC3	10	11	1	0.967719	0.955506	0.942648	0.845866	0.775488	0.665941	0.24273	1	0.994014	0.958807	0.955686	0.752552	0.531933	0.499476	0.22285	1	1.01866	1.03511	1.01249	0.956301	0.695896	0.575415	0.256584	1	1.0016	1.0338	0.991088	0.796581	0.502872	0.458213	0.288199	18.5726	-0.0869339	0	0.902692	15.9732	-0.072601	0	0.969766	17.9438	-0.0875074	0	0.975459	15.6059	-0.0911773
O43633	CHMP2A	16	14	1	1.0381	1.00427	1.03314	0.89151	0.890831	1.06411	0.608849	1	0.979345	0.971884	0.951571	0.764969	0.586754	0.567651	0.395373	1	0.996898	1.02726	0.993961	0.770974	0.782818	0.755852	0.484066	1	0.991681	0.991874	1.00697	0.820202	0.544474	0.525248	0.356316		0	0	0.805156	18.1576	-0.05534	0.121403	0.980026		-0.0380562	0	0.879924	16.5801	-0.0863876
O43639	NCK2	11	12	1	1.00206	1.05568	1.09011	0.850514	0.862919	0.692976	0.16371	1	0.984454	1.04246	1.05027	0.793957	0.598291	0.591932	0.231758	1	1.06643	1.10317	1.10596	1.00315	0.736865	0.626492	0.218516	1	1.02259	1.08727	1.07616	0.843186	0.576977	0.53251	0.263787	18.8545	-0.192026	0	0.925719	17.1441	-0.0713035	0	0.932773	18.2554	-0.10309	0	0.928118	16.9941	-0.0756657
O43657	TSPAN6	7	5	1	0.99503	1.00772	1.00132	0.929978	1.00428	1.11539	0.92556	1	0.981647	1.05492	1.0342	0.76456	0.565857	0.624012	0.595959	1	0.968424	1.06441	1.06235	1.01878	0.813287	0.880703	0.861718	1	1.16753	1.24865	1.17831	0.955229	0.629407	0.654359	0.58458		-0.0050264	0.993871	0.00405978		-1.00798	0.595276	0.980296		-0.116115	0.851729	0.812808		-0.185949
O43660	PLRG1	12	15	1	0.88191	0.90507	0.808069	0.571594	0.300654	0.139171	0.0888453	1	0.915784	0.915947	0.861648	0.481111	0.234901	0.127169	0.0816647	1	0.98978	0.933555	0.815577	0.586089	0.263344	0.133441	0.0837054	1	0.966435	0.961098	0.892135	0.51313	0.227658	0.124539	0.0813888	12.2426	-0.115449	0	0.970107	11.8484	-0.132599	0	0.987292	12.2683	-0.121971	0	0.98935	12.0685	-0.142229
O43663	PRC1	17	16	1	0.978517	0.918897	0.798593	0.376693	0.123047	0.0847888	0.0540144	1	0.974058	0.987589	0.785476	0.371026	0.107646	0.0518283	0.0455335	1	1.00061	0.966324	0.87878	0.43628	0.131025	0.0729429	0.0579131	1	1.01548	0.907969	0.803345	0.371151	0.120427	0.0549913	0.0385832	10.9443	-0.159338	0	0.994149	10.852	-0.168109	0	0.998079	11.4915	-0.175067	0.0152824	0.998434	10.9272	-0.167477
O43665-3	RGS10	10	13	1	0.999821	0.991166	1.05977	0.833932	0.797857	0.89893	0.485452	1	0.971445	1.06583	1.03645	0.75987	0.600177	0.655253	0.470673	1	1.0489	1.04648	0.97045	0.81269	0.729973	0.65104	0.443733	1	0.949444	1.01888	0.96429	0.801511	0.599064	0.548688	0.396179		-0.0449147	0	0.730286		-0.103254	0.552124	0.935629	20.6884	-0.0469074	0	0.96192	18.0151	-0.0610574
O43670-2	ZNF207	1	1	1	0.896382	1.21598	1.18998	0.79921	0.709922	0.863593	0.650541	1	0.531485	0.978423	1.1495	0.798135	0.525412	0.589644	0.693673	1	1.02769	1.03268	1.05823	0.620353	0.529346	0.373093	0.437101	1	1.1417	1.0484	1.06419	0.994592	0.728552	0.448272	0.362022		-0.667448	0.741352	0.61018		-0.98293	0.60291	0.349702	13.3367	-0.187223	0.436993	0.973147	17.0739	-0.133498
O43670-4	ZNF207	12	13	1	0.916496	1.1111	1.12022	0.842308	0.808984	1.10446	0.855566	1	0.912341	1.02631	1.0047	0.746752	0.567516	0.596845	0.616598	1	0.962603	0.967078	1.03635	0.810279	0.71362	0.626296	0.639655	1	1.00138	0.999665	1.03583	0.808116	0.541768	0.487858	0.478079		-0.0339115	0.904648	0.222532		-0.89828	0.593653	0.965265		-0.0783825	0.634803	0.96712	16.649	-0.134459
O43674	NDUFB5	6	6	1	1.04715	0.980849	1.01352	0.707445	0.358429	0.101663	0.0432461	1	1.03618	0.980164	0.861241	0.603284	0.343932	0.124306	0.00284377	1	1.04602	1.00626	1.01078	0.740485	0.40062	0.134314	0.0429493	1	0.990033	0.889674	0.91388	0.66931	0.349142	0.135189	0.0151029	13.5532	-0.152295	0	0.994807	12.7499	-0.130587	0	0.986514	13.8936	-0.14537	0	0.995104	13.2685	-0.138859
O43676	NDUFB3	5	3	1	0.961334	1.04035	1.04265	0.803612	0.561166	0.257231	0.0958222	1	0.992594	0.972634	0.903352	0.752442	0.484628	0.262498	0.0786919	1	1.06353	1.12782	1.04942	0.748064	0.566888	0.293767	0.111849	1	1.04382	1.06823	1.02642	0.874071	0.473984	0.276425	0.115454	15.1731	-0.120488	0	0.987978	14.4594	-0.110395	0	0.987752	15.1088	-0.106865	0	0.965406	14.9732	-0.132513
O43677	NDUFC1		1									1	1.0843	1.1191	1.22562	0.965623	0.671089	0.786028	0.991315									1	0.895271	1.13825	0.920719	0.703979	0.430191	0.571691	0.576753						-0.454318	0.816144	0.443573						-0.116703
O43678	NDUFA2	5	9	1	1.04746	1.04859	0.983754	0.730764	0.571292	0.727653	0.465286	1	1.08427	1.00962	0.944314	0.631578	0.333952	0.308842	0.350089	1	1.0275	0.996728	0.924088	0.651631	0.438716	0.457643	0.38622	1	1.00386	0.995654	0.944842	0.643677	0.337963	0.267465	0.274505		-0.103632	0.574514	0.892704	12.7658	-0.201798	0.31785	0.986432	14.1566	-0.109646	0.383095	0.993316	13.0179	-0.151485
O43681	ASNA1	20	25	1	1.01421	0.972002	1.01982	0.774752	0.493625	0.248777	0.0531754	1	1.01877	0.995483	0.997223	0.783732	0.477304	0.277775	0.0896621	1	1.0208	1.01714	1.03737	0.921309	0.513397	0.257863	0.0848212	1	1.02498	0.983626	1.00054	0.789893	0.472669	0.260599	0.0942215	14.6579	-0.123978	0	0.990842	14.7115	-0.115743	0	0.995624	15.2627	-0.142439	0.0111227	0.995738	14.6801	-0.118579
O43683	BUB1	13	15	1	0.942746	0.961964	0.904665	0.532726	0.181528	0.0636688	0.0341115	1	1.0109	1.00853	0.980339	0.583748	0.192137	0.0601139	0.0268471	1	1.0271	1.05512	0.97028	0.546001	0.197878	0.0691365	0.0434848	1	1.00498	1.07018	0.955948	0.542068	0.19768	0.0611737	0.0363985	12.1084	-0.167243	0	0.995382	12.4861	-0.185653	0.000583877	0.999713	12.3047	-0.18079	0.0161036	0.997095	12.28	-0.174265
O43684	BUB3	28	22	1	0.997471	0.98039	1.01517	0.846144	0.728001	0.597655	0.212031	1	0.985517	0.963425	0.949281	0.735082	0.528377	0.435772	0.223377	1	1.05248	1.00159	1.06188	0.892852	0.692947	0.501043	0.25318	1	0.99634	0.98095	1.01915	0.775233	0.492503	0.399018	0.213664	17.8469	-0.0855407	0	0.946642	15.5497	-0.0762175	0	0.987081	17.4306	-0.0870936	0	0.981884	15.2501	-0.0933545
O43688-2	PPAP2C	4	5	1	0.96854	0.935325	0.957149	0.767011	0.749951	0.834162	0.540005	1	0.973772	0.995609	0.928675	0.711615	0.495403	0.540758	0.458745	1	1.07627	1.19954	1.09597	0.938189	0.728138	0.715815	0.543824	1	1.03246	1.10012	1.06299	0.77304	0.552133	0.543813	0.438542		-0.0285662	0	0.764456	17.259	-0.093755	0.457497	0.985165		-0.0552419	0.494054	0.821284	17.5532	-0.118978
O43707	ACTN4	159	162	1	0.953636	0.970439	0.990265	0.832985	0.913395	0.992161	0.693833	1	1.00388	1.03581	1.02854	0.817346	0.61587	0.663513	0.584191	1	1.05348	0.940162	1.04554	1.00478	0.758042	0.739701	0.609634	1	0.977872	1.04844	1.01757	0.826692	0.590322	0.555163	0.475521		-0.0161107	0	0.391637		-0.893002	0.621192	0.980625		-0.084694	0.655875	0.917462		-0.0958531
O43709	WBSCR22	10	10	1	1.00126	1.11822	1.02062	0.762208	0.499315	0.399911	0.279723	1	1.03075	0.941619	0.968388	0.694272	0.411138	0.236675	0.145423	1	1.04582	1.10903	1.06926	0.795088	0.517239	0.336493	0.268393	1	1.01678	1.079	0.978345	0.697266	0.368385	0.225816	0.132869	15.0703	-0.10103	0.238332	0.97529	13.9304	-0.109845	0.0187603	0.994951	15.054	-0.112554	0.213621	0.974373	13.6593	-0.126539
O43715	TRIAP1	1	2	1	1.43178	1.79829	1.83428	1.60574	1.80852	1.45731	1.26173	1	1.16579	1.35947	1.31007	1.06001	0.770541	1.02765	0.949983	1	1.27707	1.78719	2.10514	1.91633	1.186	1.30365	1.1898	1	1.22958	1.25458	1.34792	1.03082	0.872685	0.860021	0.777348			1.5	0.405835		-0.0123939	0.930743	-0.151787			1.5	0.255016		-0.0685572
O43716	GATC	4	7	1	1.18188	1.31588	1.22848	1.07978	0.947731	0.784347	0.550908	1	1.24214	1.27757	1.42622	1.0428	0.733189	0.636949	0.498796	1	1.09433	1.17705	1.20752	0.527957	0.754042	0.542714	0.4253	1	1.16178	1.22437	1.13535	0.950379	0.573312	0.455959	0.347615		-0.0846243	0.340789	0.565176		-0.106595	0.533723	0.57544		-0.303976	0.560152	0.797518	15.9725	-0.138547
O43719	HTATSF1	46	61	1	0.968033	1.00028	1.02348	0.883646	0.778724	0.569746	0.165682	1	0.995253	1.01343	1.10774	0.856432	0.609811	0.526155	0.230796	1	1.0177	1.07578	1.12589	1.0997	0.703986	0.540168	0.204622	1	1.03199	1.18989	1.17424	0.909278	0.587235	0.500793	0.236317	17.8596	-0.113683	0	0.960967	17.0074	-0.0820803	0	0.955499	17.7167	-0.111207	0	0.932296	16.8009	-0.0915227
O43731-2	KDELR3		2									1	1.30401	0.963063	0.855641	0.439577	0.145039	0.0364907	0.00173982									1	0.990491	0.965034	0.857555	0.470292	0.14825	0.0688848	0.0170885					11.4528	-0.173702	0	0.945078					11.6094	-0.164844
O43731	KDELR3	2		1	1.03155	0.972025	0.886716	0.590342	0.284322	0.114519	0.00825138									1	1.00493	1.05495	1.00208	0.606027	0.304407	0.14752	0.0323782									12.5862	-0.141508	0	0.993516					12.9653	-0.143637	0	0.993547
O43734	TRAF3IP2	1	2	1	0.81128	1.09905	0.829915	0.48746	0.381557	0.288617	0.125794	1	1.01164	1.10819	0.985093	0.626799	0.312352	0.323485	0.207992	1	0.910232	1.19558	0.942953	0.682751	0.313783	0.227904	0.127485	1	1.1469	1.01578	0.936659	0.71092	0.408234	0.229705	0.190751	12.4393	-0.101015	0.0464488	0.934468	12.8413	-0.17169	0.243599	0.982197	13.31	-0.135772	0.0886307	0.957008	13.8928	-0.112804
O43739	CYTH3		2									1	1.11696	1.06749	1.06193	0.784554	0.37782	0.0617918	0									1	1.09779	1.08426	1.10129	0.762029	0.399949	0.0958785	0.0364246					13.9049	-0.178659	0	0.981002					13.9626	-0.160685
O43741	PRKAB2	4	4	1	1.10022	1.13558	1.12721	0.724166	0.27556	0.15308	0.0871443	1	0.987062	1.05139	1.03413	0.720899	0.357551	0.167973	0.0874671	1	1.06727	1.03529	0.948855	0.559539	0.337678	0.109231	0.0610979	1	1.02462	1.17026	1.03548	0.754932	0.402696	0.167452	0.113429	13.2569	-0.19407	0.0923958	0.967845	13.6882	-0.143808	0.032362	0.994721	12.7214	-0.134084	0	0.990724	14.0145	-0.139634
O43747-2	AP1G1	31	44	1	1.02643	1.0094	1.04552	0.882388	0.752009	0.338674	0.0169223	1	0.967384	0.999186	0.948007	0.743615	0.516338	0.344292	0.0568081	1	0.973503	1.02543	1.01506	0.855803	0.685976	0.385171	0.0201505	1	1.00551	0.982492	0.972146	0.791084	0.500813	0.338017	0.0656997	16.5659	-0.168278	0	0.979703	14.803	-0.104056	0	0.976301	16.3285	-0.136881	0	0.968912	14.9634	-0.110302
O43752	STX6	10	14	1	1.00947	0.996689	1.02016	0.841285	0.747108	0.792128	0.512898	1	0.954254	0.990618	0.945376	0.679902	0.459174	0.407904	0.301956	1	1.04875	1.05392	1.04857	0.946064	0.71326	0.613815	0.456174	1	0.997023	1.03753	0.9912	0.7682	0.479867	0.379544	0.276785		-0.0380772	0	0.888138	14.4413	-0.0950479	0.260515	0.99266	20.0281	-0.0684714	0.350579	0.969546	14.8683	-0.104842
O43759	SYNGR1	1	1	1	1.17418	1.27343	1.2089	0.859494	0.692098	0.633582	0.588933	1	1.14931	1.1317	1.17996	0.825353	0.540237	0.516145	0.401683	1	1.14085	1.13852	1.02518	0.6648	0.467975	0.44119	0.298309	1	1.05669	1.0863	0.958246	0.703422	0.358731	0.3257	0.365127		-0.0881578	0.605898	0.712059	15.9893	-0.126241	0.442798	0.889226	14.0734	-0.12147	0.342318	0.938666	12.909	-0.260405
O43760	SYNGR2	8	7	1	1.24606	1.37719	1.36017	1.24907	1.38614	1.62325	1.36463	1	1.20354	1.11865	1.22932	0.984943	0.763496	0.917132	0.884049	1	1.14959	1.23309	1.30196	1.23999	1.11681	1.17993	0.930296	1	1.01012	1.12844	1.18415	0.93663	0.622849	0.703834	0.809995			1.5	0.668982		-0.358137	0.854893	0.338904			1.16701	0.216559		-0.721306
O43761	SYNGR3	1		1	0.95469	0.993569	1.06433	0.537228	0.246295	0.169227	0.0495097									1	0.785879	0.917712	0.820724	0.160783	0.219435	0.135265	0.0617324									12.3586	-0.195289	0.0974056	0.985855					9.90791	-0.376295	0.134898	0.942479
O43765	SGTA	39	41	1	0.989228	1.00404	1.0338	0.909431	0.968632	1.18106	0.958325	1	0.991935	0.990612	0.979952	0.774266	0.685907	0.766	0.767299	1	0.983767	1.02008	1.03812	0.954712	0.847297	0.866554	0.81335	1	0.977597	1.01153	1.0483	0.914004	0.653122	0.688275	0.659564		0.00789736	1.05302	0.0907551		-0.103585	0.740777	0.961531		-0.0523096	0.837611	0.932323		-0.778421
O43766	LIAS	6	3	1	1.00713	1.06594	1.02045	0.719308	0.607267	0.600343	0.369767	1	0.912863	0.986215	0.991338	0.606592	0.404363	0.393371	0.366739	1	1.03661	1.02206	0.945956	1.70492	0.531659	0.46984	0.337339	1	1.09403	0.9335	1.04686	0.701106	0.428954	0.330543	0.281404	18.0512	-0.0621714	0.268917	0.939142	12.8507	-0.188948	0.377698	0.986598	15.0818	-0.666733	0.403586	0.615634	13.789	-0.139556
O43768-3	ENSA	14	15	1	1.04254	1.23062	1.26749	0.882077	1.12632	1.06298	1.05846	1	0.968127	0.973494	0.966074	0.768263	0.649343	0.760988	0.768228	1	0.848385	0.94154	1.02165	1.18481	0.776794	0.786122	0.851424	1	0.967127	0.984547	0.999411	0.886257	0.618726	0.673516	0.641574		0.459005	1.10466	0.105346		-0.099528	0.728537	0.911996			0.831635	0.0458446		-0.909524
O43772	SLC25A20	7	4	1	1.08401	1.07219	1.03149	0.594708	0.250581	0.110771	0.063091	1	0.948814	0.940244	0.882659	0.573851	0.268631	0.0953472	0.0509497	1	1.00799	0.998872	0.939823	0.597912	0.228371	0.108472	0.0553655	1	0.932722	0.98029	0.805016	0.583822	0.248981	0.11678	0.0350307	12.6664	-0.177867	0.051953	0.988145	12.4364	-0.139735	0	0.992117	12.6011	-0.156786	0.00731001	0.999739	12.18	-0.130498
O43776	NARS	51	44	1	1.00909	1.00185	0.995825	0.678748	0.206613	0.069655	0.0435247	1	1.00006	1.00506	0.991422	0.712353	0.367058	0.116603	0.0609386	1	1.00865	1.02311	1.02693	0.794061	0.278468	0.0790819	0.0425084	1	0.973595	1.01195	1.00217	0.776785	0.359695	0.116831	0.0549053	12.8985	-0.20315	0.0246269	0.999881	13.6179	-0.145236	0	0.998167	13.5772	-0.198533	0.0173734	0.998796	13.8676	-0.158444
O43791	SPOP	1		1	0.928519	0.890252	0.889361	0.431143	0.228887	0.144278	0.0907289									1	1.00668	1.07289	0.994368	0.645086	0.211954	0.116808	0.125535									11.5957	-0.157122	0.0738464	0.983171					12.6711	-0.222869	0.109655	0.995646
O43795	MYO1B	42	39	1	1.07404	1.0679	0.912545	0.438495	0.122514	0.0562918	0.0351098	1	1.1265	1.1195	0.958319	0.460763	0.113142	0.046756	0.0328392	1	1.08933	1.04525	0.921022	0.450436	0.13389	0.0589466	0.0355292	1	1.15404	1.14725	0.969558	0.446097	0.128446	0.0538332	0.0309525	11.6083	-0.191804	0.00877522	0.993369	11.8082	-0.224011	0.021141	0.982372	11.6928	-0.190198	0.0107289	0.993459	11.7653	-0.224248
O43805	SSNA1	7	8	1	1.04442	1.07553	1.15078	0.960409	0.995373	1.06929	0.770955	1	1.05561	1.11074	1.19274	0.93787	0.75194	0.795664	0.849372	1	0.973702	1.10689	1.18759	1.18244	0.839228	0.837455	0.73484	1	1.10378	1.14106	1.17781	0.976539	0.693436	0.74123	0.739166		0	0	0.585132		-0.515998	0.798992	0.664373		-0.174787	0.786108	0.572414		-0.68909
O43808	SLC25A17	5	1	1	1.08229	1.10998	1.03576	0.578775	0.243455	0.132405	0.0403823	1	1.20373	1.14591	1.08456	0.593114	0.254426	0.0955906	0.0403058	1	0.998668	1.04488	1.05778	0.562921	0.246186	0.10462	0.0518387	1	1.03804	1.00815	1.00523	0.555186	0.247661	0.084661	0	12.6006	-0.176465	0.0477448	0.982331	12.7037	-0.182689	0.0365239	0.954311	12.513	-0.186127	0.0550021	0.991155	12.5095	-0.168501
O43809	NUDT21	17	18	1	0.965615	0.959622	0.893819	0.663616	0.538331	0.532456	0.340112	1	0.96364	0.934669	0.864462	0.565083	0.353386	0.347509	0.329404	1	0.934487	0.914816	0.903249	0.633328	0.394536	0.3835	0.325949	1	0.973532	0.936563	0.865517	0.582682	0.349289	0.291242	0.292156	16.5475	-0.056595	0	0.97297	12.5995	-0.118781	0.29076	0.988608	13.5168	-0.10705	0.291786	0.976337	12.7336	-0.111915
O43813	LANCL1	20	19	1	0.947867	1.06856	1.07309	0.816243	0.720443	0.746155	0.436737	1	0.929943	1.05645	1.04782	0.766629	0.534506	0.549591	0.46784	1	0.9947	1.07694	1.0239	0.824678	0.64009	0.558547	0.421643	1	0.996934	1.0144	1.02851	0.798783	0.527712	0.463694	0.386019		-0.047315	0	0.864078		-0.158983	0.507652	0.967823	18.6083	-0.0664505	0.317508	0.974447	15.6288	-0.110654
O43815	STRN	23	25	1	1.02332	1.05095	1.07003	0.783575	0.466223	0.138277	0.0251654	1	1.00645	1.04362	0.956571	0.694974	0.413969	0.187387	0.0478518	1	1.0393	1.00395	1.03637	0.759013	0.453367	0.15777	0.0417086	1	0.998174	0.935855	0.963238	0.724094	0.387654	0.181243	0.0443317	14.3696	-0.150629	0	0.986865	13.7723	-0.125896	0	0.993666	14.2365	-0.1404	0	0.991758	13.8069	-0.133515
O43818	RRP9	9	9	1	1.09854	1.13434	0.993918	0.740107	0.391271	0.230936	0.0999954	1	1.10987	0.985387	0.894139	0.579072	0.334615	0.264872	0.170576	1	0.944992	0.925777	0.973775	0.735621	0.315479	0.167365	0.092069	1	0.935712	0.938708	0.870119	0.547137	0.318131	0.215807	0.136199	14.0403	-0.123111	0.010818	0.975474	12.8221	-0.111845	0.100042	0.98645	13.5204	-0.155805	0.0568967	0.991517	12.5469	-0.107817
O43819	SCO2	8	8	1	0.971813	0.97568	0.911084	0.532065	0.171835	0.0423312	0.0217185	1	1.02164	1.04274	0.995357	0.596637	0.19217	0.0668794	0.036991	1	0.971421	0.978869	0.894953	0.551382	0.178537	0.0494517	0.0322836	1	0.989624	1.12766	0.98687	0.567155	0.20356	0.0649136	0.0350056	12.1084	-0.178177	0	0.997656	12.5348	-0.194975	0.0189206	0.998087	12.178	-0.170879	0	0.996614	12.4332	-0.182801
O43820	HYAL3		1									1	0.976937	1.16983	1.48435	0.713565	0.42832	0.318597	0.361542									1	0.984652	1.10501	1.01386	0.670599	0.285094	0.195313	0.312509					13.0736	-0.245607	0.361206	0.783861					12.6275	-0.292618
O43822-4	C21orf2	1	1	1	0.881584	0.901435	0.833877	0.689079	0.32895	0.156405	0	1	2.45742	0.722695	1.14346	0.729817	0.261417	0.201261	0.0714025	1	1.05641	1.22624	1.11037	0.809013	0.469679	0.141877	0.129222	1	1.26737	2.59396	1.15588	0.445444	0.440407	0.240948	0.165945	13.1876	-0.13391	0	0.954923	13.227	-0.200772	0.109821	0.455107	14.4992	-0.146667	0.0375442	0.945627	11.8113	-0.362878
O43823	AKAP8	12	11	1	1.03129	1.07854	1.01902	0.612785	0.3313	0.219343	0.131683	1	0.96329	0.993266	0.890795	0.539247	0.219026	0.0948553	0.0737521	1	1.00281	1.00277	0.917148	0.569041	0.26172	0.148057	0.113984	1	1.00867	0.992661	0.877817	0.523086	0.208163	0.106414	0.064098	12.9958	-0.147967	0.127518	0.988892	12.1793	-0.145407	0	0.998066	12.4764	-0.141568	0.0543196	0.999805	12.0436	-0.144385
O43824	GTPBP6	7	10	1	1.03094	0.919321	0.864539	0.492851	0.197903	0.0838024	0.0526363	1	1.02875	0.970221	0.884562	0.528659	0.189175	0.0842778	0.0502676	1	1.02779	1.05193	0.93369	0.509863	0.173944	0.0947495	0.0456844	1	1.06359	1.06959	0.974415	0.50569	0.188791	0.0809779	0.0489767	11.8127	-0.148629	0	0.993586	12.0469	-0.154724	0	0.997557	12.0417	-0.175551	0.0226614	0.99734	12.0906	-0.190605
O43826-2	SLC37A4	5	3	1	1.00681	1.03369	0.900597	0.528381	0.17732	0.0431363	0.0193409	1	0.956642	0.985061	0.926591	0.58747	0.22848	0.0864474	0.0265397	1	0.951391	0.962505	0.859256	0.542114	0.168719	0.0580373	0.0260596	1	0.96026	1.03831	0.966415	0.557805	0.202098	0.0709613	0.0360874	12.0737	-0.174094	0	0.997444	12.5196	-0.160395	0	0.997562	12.0106	-0.162783	0	0.992041	12.3746	-0.175297
O43829	ZBTB14	1	3	1	1.12936	0.941777	0.98985	0.68068	0.443975	0.342147	0.164404	1	1.01103	1.00842	1.17181	0.640442	0.361534	0.289952	0.187184	1	1.15571	1.12346	1.21488	0.750547	0.425746	0.216868	0.156778	1	0.897787	0.950197	1.02209	0.648235	0.363781	0.226528	0.108926	14.3722	-0.093876	0.0167393	0.969304	12.9736	-0.188352	0.241556	0.961567	14.104	-0.145456	0.123715	0.929897	13.4411	-0.128942
O43837	IDH3B	35	34	1	0.993888	0.983262	0.943471	0.572305	0.289473	0.204146	0.0651242	1	1.00492	1.00448	0.956119	0.579555	0.271343	0.190252	0.107646	1	1.007	1.0219	0.949098	0.533347	0.294737	0.199044	0.0927881	1	0.98454	0.985246	0.894104	0.540021	0.273033	0.175942	0.108195	12.7308	-0.128307	0.0135632	0.996102	12.6092	-0.149504	0.0894081	0.998917	12.4634	-0.138915	0.0745795	0.996128	12.3447	-0.128864
O43847-2	NRD1	41	49	1	0.958491	0.972192	0.987622	0.862575	0.504916	0.138374	0.0312673	1	0.959771	1.00955	0.988671	0.768426	0.522449	0.186957	0.0313045	1	1.0029	1.01924	1.02104	0.941419	0.570201	0.177133	0.0433558	1	0.961504	0.981619	0.986395	0.791751	0.515723	0.186407	0.0378539	14.8308	-0.166321	0	0.994376	14.61	-0.133464	0	0.986076	15.3799	-0.179129	0	0.999045	14.6821	-0.137003
O43852-3	CALU	32	36	1	0.951798	0.937954	0.921789	0.713006	0.488956	0.403719	0.283684	1	0.989996	0.99485	0.981915	0.689137	0.413312	0.369175	0.310844	1	1.00587	0.992878	0.967803	0.771588	0.439856	0.349433	0.269326	1	0.947662	0.985861	0.931139	0.677266	0.389482	0.31076	0.252988	15.1981	-0.0739249	0.0492057	0.98764	13.7007	-0.136279	0.313539	0.998599	14.4173	-0.120379	0.244398	0.998218	13.6604	-0.113349
O43852-4	CALU	4	2	1	0.894717	0.991126	0.899675	0.81689	0.660884	0.733822	0.509566	1	1.02062	0.986698	0.980752	0.735478	0.523562	0.511655	0.453286	1	0.926872	1.00225	0.943113	0.952207	0.586358	0.590045	0.478367	1	1.06417	1.05935	1.03794	0.807511	0.524152	0.498253	0.426154		-0.0354549	0	0.86199	16.5098	-0.112278	0.4638	0.995928		-0.155173	0.527509	0.956788	15.7857	-0.1291
O43861	ATP9B	3	1	1	1.08617	1.05062	0.905202	0.493918	0.0536932	0.00226481	0.00219209	1	0.942979	1.00476	0.845223	0.463038	0.114841	0.0211385	0	1	1.01593	0.990256	0.894722	0.445656	0.0805079	0.0219906	0.0090516	1	1.04996	1.04316	0.879955	0.42398	0.139001	0.048428	0	11.9113	-0.254358	0	0.990294	11.5013	-0.180097	0	0.992625	11.585	-0.207288	0	0.997684	11.4679	-0.180954
O43865	AHCYL1	10	16	1	0.999767	1.03254	1.04257	0.785973	0.440252	0.127119	0.0143269	1	0.981342	0.991875	1.03755	0.765929	0.513764	0.247921	0.0144693	1	1.03457	0.957901	1.01445	0.831943	0.518326	0.200518	0.0327069	1	1.04449	1.11234	1.08637	0.857127	0.495132	0.25399	0.050238	14.2369	-0.155786	0	0.992115	14.6934	-0.128134	0	0.982395	14.8871	-0.144297	0	0.991688	14.9941	-0.137747
O43896	KIF1C	23	21	1	0.991169	1.01284	0.963702	0.576627	0.198402	0.0613227	0.0338155	1	1.0513	1.03291	0.918928	0.576839	0.222672	0.0787006	0.0444481	1	1.01697	1.02488	0.956033	0.61508	0.213347	0.0772676	0.0393314	1	1.0048	0.968269	0.94282	0.588838	0.228082	0.0792148	0.0411424	12.4512	-0.17841	0	0.999746	12.4387	-0.158657	0	0.996611	12.6589	-0.172356	0	0.999235	12.5489	-0.162504
O43900	PRICKLE3		3									1	0.964307	0.895278	0.823974	0.415324	0.197541	0.114597	0.0607999									1	0.883706	0.712111	0.757524	0.391211	0.219227	0.130988	0.047572					11.3188	-0.140473	0	0.99018					10.6443	-0.120961
O43909	EXTL3	4	10	1	0.984747	0.940941	0.964132	0.615432	0.311166	0.155033	0.0837764	1	1.00897	1.00121	0.960362	0.556713	0.238368	0.0966791	0.0280761	1	0.99662	1.02735	1.00102	0.524161	0.292545	0.135917	0.108894	1	1.05075	1.08291	0.963406	0.584212	0.244779	0.109108	0.0494078	12.9913	-0.13407	0.0126875	0.996034	12.4529	-0.158757	0	0.999145	12.3684	-0.165919	0.0986744	0.993999	12.6073	-0.156526
O43913	ORC5	14	13	1	0.957136	0.911215	0.795928	0.351321	0.0616739	0.0242404	0.0105016	1	1.00416	0.955375	0.784631	0.329877	0.0540961	0.0213842	0.00896284	1	0.977208	0.929844	0.800603	0.330248	0.0650477	0.0265381	0.0173747	1	0.992963	0.933495	0.791775	0.31133	0.0670471	0.0272264	0.0190155	10.759	-0.188994	0	0.99026	10.6353	-0.19367	0	0.996175	10.7111	-0.192894	0	0.994818	10.6141	-0.194522
O43920	NDUFS5	6	5	1	1.01901	0.957442	0.973064	0.626851	0.268782	0.11529	0.102572	1	1.00293	1.03809	0.947137	0.612593	0.236939	0.111301	0.0650537	1	1.02543	1.00459	1.02102	0.710721	0.269121	0.111035	0.0766721	1	0.95824	1.00973	0.92413	0.599372	0.244912	0.113428	0.0691025	12.8259	-0.163114	0.0591913	0.997735	12.6917	-0.159605	0.0206434	0.998702	13.2078	-0.182967	0.0528562	0.998578	12.6312	-0.146237
O43924	PDE6D	4	2	1	0.995592	1.02015	1.05966	0.82862	0.866491	1.08202	0.845794	1	0.900171	0.862572	0.922865	0.658345	0.453214	0.511184	0.457373	1	1.02599	1.07713	1.07355	1.03312	0.812574	0.797928	0.777926	1	0.923593	0.954967	0.984486	0.677456	0.463806	0.442233	0.347657		-0.0345744	0.90719	0.303047	15.2409	-0.111365	0.451372	0.907001		-0.254949	0.787927	0.887237	14.2218	-0.118581
O43929	ORC4	16	13	1	0.9896	0.985964	0.870077	0.454049	0.135324	0.0601803	0.0326369	1	1.00608	0.992278	0.95856	0.529663	0.14093	0.056233	0.0301718	1	1.0149	0.986411	0.898133	0.447946	0.138859	0.0537281	0.036414	1	1.02449	1.09649	0.890071	0.468211	0.150352	0.0554557	0.0298361	11.5618	-0.171113	0	0.998828	12.1359	-0.204623	0.0130797	0.999871	11.6275	-0.178375	0	0.999516	11.7162	-0.173755
O43933	PEX1	12	13	1	1.06751	1.03467	0.893572	0.471955	0.207513	0.113139	0.0738306	1	1.04437	0.997548	0.90154	0.443461	0.121778	0.0545256	0.0371289	1	1.00641	0.99592	0.892792	0.434891	0.161617	0.0936493	0.0732773	1	1.03275	1.06297	0.915523	0.425918	0.138927	0.0571001	0.0326495	11.8102	-0.155569	0.0345918	0.995611	11.6	-0.185117	0.00196223	0.998253	11.5431	-0.175665	0.0432912	0.999872	11.5725	-0.189539
O60216	RAD21	23	23	1	0.993619	0.995371	0.943667	0.559024	0.158947	0.0416466	0.0258058	1	1.00929	1.04187	0.886047	0.509233	0.130422	0.0327267	0.027004	1	0.998431	1.03148	1.0002	0.808432	0.148495	0.048397	0.0325949	1	0.991727	0.914813	0.90612	0.504914	0.12678	0.03494	0.0260576	12.2791	-0.193463	0	0.999517	11.8908	-0.18428	0	0.9959	13.1375	-0.291879	0.032051	0.999342	11.9177	-0.19093
O60220	TIMM8A	8	6	1	1.04747	1.32211	1.35248	1.08932	1.24145	1.40678	1.23271	1	1.19075	1.60655	1.7041	1.17984	0.943001	0.858851	1.02583	1	1.16291	1.44065	1.39032	1.06993	1.02158	1.09768	1.06987	1	1.17146	1.41964	1.48157	1.1305	0.715844	0.608432	0.677757		1.11282	1.27414	0.601814		-0.0126644	0.941339	-0.412826			1.18167	0.143379		-0.683742
O60231	DHX16	28	35	1	1.02827	1.04403	1.01964	0.66365	0.23911	0.0969373	0.0419239	1	0.992268	1.00584	0.956287	0.632276	0.232102	0.075638	0.0486783	1	1.01164	1.00338	0.983134	0.625854	0.235682	0.0872932	0.0493454	1	1.02807	1.03388	0.980025	0.638461	0.225991	0.0883702	0.0554019	12.956	-0.182328	0.0235414	0.996876	12.7805	-0.168259	0	0.999664	12.7731	-0.172171	0.014495	0.999718	12.7883	-0.180387
O60232	SSSCA1	12	14	1	1.11036	1.24676	1.2625	1.03247	0.986531	1.05877	0.805225	1	1.21036	1.2744	1.44996	1.0616	0.78664	0.721768	0.748506	1	1.04945	1.15836	1.21655	0.946698	0.807319	0.732017	0.64307	1	1.15485	1.49051	1.41007	1.10038	0.664793	0.6663	0.71056			0	0.0415642		-0.585543	0.735137	0.352814		-0.0525883	0.621577	0.735515		-0.231312
O60238	BNIP3L	1		1	0.997721	1.04603	1.04642	0.839706	0.601607	0.342222	0.198072									1	0.934219	1.04373	0.893549	0.9138	0.491131	0.248444	0.138957									15.94	-0.0996425	0	0.991898					15.0159	-0.149452	0.0953119	0.980524
O60239	SH3BP5	4	3	1	0.948737	0.965495	1.04615	0.699336	0.590575	0.649197	0.451756	1	1.09551	1.16063	1.22888	0.688455	0.39529	0.312603	0.282998	1	0.989846	1.01989	1.05777	0.709112	0.541266	0.465857	0.399642	1	1.0522	1.13206	1.0172	0.595771	0.365566	0.296566	0.230668		-0.1795	0.560994	0.924128	13.1285	-0.204978	0.309108	0.917744	15.215	-0.117475	0.42438	0.981842	12.8183	-0.163674
O60243	HS6ST1		2									1	0.910785	0.962813	0.894063	0.576191	0.231949	0.122126	0.00739969									1	0.92869	0.947775	0.716758	0.484434	0.218302	0.109604	0.0348087					12.415	-0.149153	0	0.988496					11.1404	-0.12674
O60244	MED14	30	33	1	1.02552	0.958457	0.878583	0.440592	0.116723	0.0452124	0.0322879	1	1.00281	0.942957	0.822226	0.449583	0.14454	0.0608955	0.0473595	1	0.979212	0.954147	0.868804	0.498576	0.132864	0.0475626	0.0303123	1	0.990236	0.927608	0.837895	0.449011	0.160293	0.0667167	0.0422002	11.5087	-0.181396	0	0.997363	11.3624	-0.156994	0	0.995422	11.7713	-0.173348	0	0.994912	11.4449	-0.156498
O60256	PRPSAP2	16	18	1	1.01907	1.03571	1.05289	0.890957	0.823452	0.972091	0.715197	1	1.02142	1.03082	0.859881	0.661131	0.483415	0.571666	0.459753	1	0.9983	1.00393	1.0183	0.831252	0.712278	0.668898	0.569536	1	0.978962	0.833728	0.892099	0.688137	0.525703	0.456414	0.336932		-0.0196041	0	0.623906	18.5623	-0.087506	0.467236	0.974325		-0.0531436	0.538747	0.981136	15.9314	-0.0594608
O60264	SMARCA5	22	29	1	0.972145	0.952493	0.769784	0.368878	0.0975774	0.0557023	0.0405162	1	0.978937	0.908744	0.783039	0.374319	0.106098	0.0447016	0.0375743	1	0.969331	0.95373	0.77937	0.367275	0.0988376	0.0454408	0.0346703	1	1.01482	0.961633	0.809007	0.347236	0.111564	0.0455255	0.0318233	10.7583	-0.166988	0	0.996018	10.8318	-0.167772	0	0.992094	10.7925	-0.170687	0	0.996182	10.859	-0.177309
O60266	ADCY3	3	5	1	1.06444	0.963254	0.929197	0.587179	0.281406	0.101471	0.0327163	1	0.995461	0.929155	0.915293	0.57967	0.246712	0.113853	0.07186	1	1.02181	0.881656	0.922355	0.718201	0.250163	0.117083	0.0520329	1	1.01802	1.0006	0.95138	0.625147	0.258236	0.134435	0.075232	12.6509	-0.146291	0	0.994261	12.5151	-0.142332	0	0.995461	13.2002	-0.171271	0.0189373	0.984134	12.819	-0.152676
O60271-4	SPAG9		55									1	0.979611	0.977904	1.03188	0.779199	0.609672	0.60427	0.445598									1	1.00188	1.06208	1.06348	0.878966	0.58582	0.556443	0.410012					20.8379	-0.0750046	0.458311	0.964031					17.5809	-0.0977645
O60271	SPAG9	38		1	0.999202	0.995094	1.01337	0.905818	0.929198	0.922436	0.458492									1	0.998063	1.01511	1.04222	0.969341	0.794518	0.757658	0.478521									20.7806	-0.190188	0	0.942146						-0.0602655	0	0.952083
O60281	ZNF292	2		1	1.05226	0.910309	0.909285	0.584388	0.325805	0.19702	0.169006									1	1.01512	0.995502	0.861398	0.610036	0.335656	0.165423	0.116791									12.7594	-0.120959	0.084189	0.988892					12.8395	-0.113223	0	0.997395
O60282	KIF5C	7	7	1	1.01351	1.0915	1.03773	0.768557	0.471205	0.201277	0.0879478	1	0.959817	1.01404	0.995873	0.661314	0.365983	0.159524	0.0300729	1	0.962506	1.04754	1.06337	1.0142	0.449208	0.191738	0.0965276	1	1.00194	1.03884	0.966269	0.662929	0.341211	0.150137	0.049597	14.47	-0.127263	0	0.987703	13.4267	-0.136688	0	0.993616	14.8241	-0.274065	0.126299	0.990514	13.3151	-0.136864
O60287	URB1	19	18	1	0.99079	1.00096	0.817819	0.349019	0.151564	0.103013	0.051165	1	1.01689	0.941378	0.781064	0.297093	0.071886	0.0441399	0.033236	1	1.02516	1.00077	0.800742	0.301224	0.140248	0.0899472	0.0553578	1	1.03576	0.977762	0.755468	0.273187	0.0888509	0.0506159	0.0302389	10.9204	-0.172442	0.0364573	0.999592	10.5364	-0.190815	0	0.997089	10.6372	-0.189944	0.0490896	0.999303	10.3752	-0.190497
O60291-2	MGRN1	3	5	1	1.10774	1.0814	1.11478	0.864217	0.604622	0.513875	0.321277	1	0.846671	0.938101	1.17005	0.751686	0.512501	0.370422	0.301346	1	0.882673	1.01302	1.06544	0.936008	0.550696	0.431116	0.223919	1	1.06862	1.23432	1.27665	0.903206	0.493055	0.389347	0.346925	17.0352	-0.0840019	0.230639	0.938873	14.7791	-0.119964	0.293738	0.906781	15.986	-0.114388	0.187286	0.959125	14.9287	-0.165383
O60292	SIPA1L3	4	4	1	0.956817	0.995239	0.940987	0.654856	0.346624	0.140256	0.0369177	1	1.0272	1.08146	1.03317	0.61205	0.321487	0.240423	0.116107	1	1.06903	0.990901	0.982755	0.516607	0.329827	0.169165	0.0366481	1	1.01707	1.01809	0.958675	0.67909	0.336308	0.259437	0.106473	13.2397	-0.13644	0	0.99551	12.9703	-0.152024	0.133016	0.98539	12.6229	-0.131702	0	0.985442	13.5081	-0.121208
O60293	ZFC3H1	13	11	1	0.963525	0.925124	0.721973	0.36811	0.257062	0.221973	0.197914	1	0.977535	0.894651	0.888531	0.530639	0.314675	0.381907	0.433851	1	0.966311	0.92618	0.751354	0.830212	0.176833	0.177135	0.171448	1	0.984259	1.18173	0.877842	0.55618	0.3091	0.35972	0.451423	10.6269	-0.139028	0.159986	0.994084	12.0437	-0.160214	0.371614	0.961018	12.6472	-0.554728	0.174119	0.932457	12.2293	-0.150355
O60294	LCMT2	3	4	1	0.930802	0.850574	0.84753	0.428733	0.164947	0.0901916	0.0447513	1	1.0277	1.06928	1.05455	0.569377	0.265766	0.133031	0.0949874	1	0.933435	0.927168	0.895934	0.515564	0.147882	0.0615415	0.0598348	1	0.999854	1.06496	0.975898	0.502653	0.260589	0.12062	0.051413	11.3965	-0.153696	0	0.977118	12.5313	-0.187538	0.0997686	0.989129	11.9494	-0.169805	0	0.99008	12.2403	-0.159638
O60296	TRAK2	1	1	1	1.11151	1.31711	1.07804	1.0749	0.635276	0.277134	0.139654	1	0.838809	1.05241	0.880475	0.490195	0.18397	0.0917773	0.0855167	1	1.03683	1.37842	1.1997	0.811713	0.516794	0.380495	0.164458	1	1.11554	1.04118	0.941764	0.580734	0.185845	0.0464815	0.0811546	15.8005	-0.197852	0.142268	0.89957	11.8204	-0.157033	0.0254634	0.975064	15.4241	-0.107633	0.0751784	0.841998	12.3967	-0.190111
O60303	KIAA0556		4									1	1.06814	1.04061	1.03122	0.637093	0.251322	0.148511	0.093827									1	0.940635	1.00651	0.939504	0.569795	0.241243	0.140311	0.0874181					12.8094	-0.18731	0.0944866	0.992938					12.4673	-0.154036
O60306	AQR	26	33	1	1.0011	1.00026	0.898866	0.493628	0.158372	0.0427801	0.0248232	1	1.00738	0.982527	0.950383	0.505564	0.173774	0.0574098	0.0262233	1	1.0088	1.0131	0.954175	0.502011	0.176821	0.0559426	0.0257679	1	1.01556	1.01596	0.965909	0.531475	0.177679	0.0625037	0.0301574	11.8694	-0.176442	0	0.998999	12.061	-0.18112	0	0.99963	12.0555	-0.181389	0	0.999571	12.2048	-0.185895
O60307	MAST3	2	3	1	1.00845	1.10548	1.10931	0.614703	0.359772	0.340148	0.18076	1	1.07601	0.889229	0.955269	0.466055	0.149201	0.0883134	0.0804735	1	1.15814	1.30281	1.22742	0.511409	0.285462	0.197811	0.153365	1	0.955336	0.98973	0.858607	0.475997	0.161592	0.0967954	0.0344469	12.8273	-0.188324	0.26237	0.962115	11.8194	-0.214644	0.0671671	0.986594	12.0533	-0.348722	0.207782	0.895473	11.6664	-0.155629
O60308	CEP104	2		1	0.902491	0.833044	0.967755	0.678483	0.3182	0.342967	0.217847									1	0.988326	0.933496	1.02347	0.954616	0.316743	0.248621	0.191092									13.125	-0.170343	0.253759	0.937116					14.0023	-0.296927	0.21582	0.993528
O60313-2	OPA1	43	42	1	1.04885	0.991356	0.90559	0.482482	0.112065	0.0431611	0.0291157	1	1.00358	0.98218	0.910189	0.499399	0.151476	0.0875257	0.0789363	1	0.99044	0.972687	0.869453	0.456719	0.114341	0.0435532	0.029091	1	1.02337	0.98787	0.900363	0.490993	0.159504	0.0814327	0.0769707	11.7939	-0.192403	0	0.997036	11.8938	-0.179448	0.0383851	0.998508	11.5513	-0.179519	0	0.997393	11.8397	-0.171522
O60318	MCM3AP	11	10	1	0.969195	1.05916	0.938926	0.551655	0.255786	0.141052	0.0921418	1	0.963681	1.01597	0.947821	0.536283	0.169282	0.110443	0.0664326	1	0.992846	0.970378	0.951983	0.597345	0.264638	0.111015	0.0781415	1	1.06915	1.04465	0.93497	0.477955	0.164484	0.0925157	0.0513581	12.4092	-0.150093	0.0530421	0.996145	12.1663	-0.190802	0.0539033	0.99831	12.695	-0.150076	0.0194087	0.999048	11.8686	-0.184621
O60333-2	KIF1B	40	41	1	1.02334	1.03719	1.04821	0.810536	0.690814	0.323629	0.0306195	1	0.958597	0.990201	0.979483	0.749348	0.527138	0.381248	0.0544147	1	1.02302	1.01198	1.00441	0.845347	0.642322	0.348178	0.0605593	1	1.03426	1.04391	1.05795	0.800956	0.516219	0.37325	0.079433	16.0847	-0.137867	0	0.966328	15.0236	-0.10222	0	0.967942	15.9606	-0.124177	0	0.982501	15.2606	-0.108208
O60333-3	KIF1B	5	5	1	1.07473	1.10043	0.951927	0.589103	0.222699	0.0531673	0.0234852	1	1.02794	1.0362	1.06492	0.582694	0.231907	0.0821617	0.0264195	1	0.997386	1.11009	1.08661	0.745036	0.233446	0.0692394	0.039907	1	0.970641	1.22816	1.1145	0.644798	0.233793	0.0966723	0.0440948	12.5376	-0.173982	0	0.989037	12.6034	-0.186975	0.0225551	0.991514	13.2345	-0.211491	0.0253229	0.986475	12.8438	-0.200031
O60336	MAPKBP1	1	1	1	0.992305	0.87528	0.761604	0.407073	0.042651	0	0.00732898	1	1.07058	0.869113	0.801833	0.327707	0.0330446	0	0.000192009	1	1.0371	1.02992	0.839371	0.345157	0.0737619	0.0145929	0	1	0.941652	0.927112	0.792695	0.283581	0.0413555	0	0	10.7759	-0.179431	0	0.977122	10.6725	-0.20522	0	0.981992	10.9342	-0.202063	0	0.997281	10.5005	-0.213368
O60337	2021-03-06	3	4	1	0.915808	1.24225	1.06639	0.756433	0.574446	0.381713	0.131041	1	1.06672	1.09021	1.03883	0.74874	0.469166	0.355133	0.188117	1	0.960806	0.910523	0.949794	0.722758	0.495179	0.272257	0.143261	1	1.02869	1.20139	1.09045	0.815532	0.458924	0.29213	0.190135	15.5234	-0.0967986	0	0.911195	14.7692	-0.103386	0.10729	0.976398	14.5208	-0.100111	0	0.984884	14.6324	-0.132402
O60341-2	KDM1A	31		1	1.0145	1.03533	1.03772	0.695114	0.322909	0.120987	0.0377803									1	1.00712	1.01144	0.983512	0.814953	0.336676	0.124549	0.0393619									13.4177	-0.155184	0	0.995435					13.9225	-0.171204	0.00190335	0.999623
O60341	KDM1A		31									1	1.00104	1.00965	1.01568	0.687624	0.33646	0.139169	0.0367453									1	1.01118	1.06165	1.05515	0.697127	0.341384	0.149324	0.0541679					13.4393	-0.147354	0	0.997229					13.5501	-0.145995
O60343	TBC1D4	37	34	1	1.03437	1.02496	1.0251	0.665629	0.22806	0.0762295	0.0294583	1	1.00031	0.993013	0.985657	0.652475	0.236025	0.0536066	0.0169369	1	0.999242	1.01312	1.01002	0.674646	0.243314	0.0816165	0.0365384	1	0.993815	0.985363	0.992709	0.688952	0.239591	0.0604778	0.0173175	12.9391	-0.187952	0.00895851	0.997433	12.8792	-0.183358	0	0.999341	13.0204	-0.180099	0.00746332	0.99924	13.0501	-0.187346
O60344	ECE2	2	4	1	0.995046	1.07681	1.09484	0.85243	0.513605	0.281618	0.0967679	1	1.00382	0.986921	0.946926	0.70707	0.493584	0.191836	0.0137633	1	0.962991	1.05607	1.14103	1.03718	0.562007	0.245615	0.143235	1	1.01598	0.920961	0.959914	0.747103	0.534987	0.240254	0.0256248	15.1878	-0.125033	0	0.982509	14.1347	-0.124712	0	0.981629	15.3344	-0.228903	0.161268	0.973433	14.6467	-0.121419
O60346	PHLPP1	8	2	1	1.03391	1.07368	1.05107	0.676148	0.342985	0.167038	0.0845291	1	0.8726	0.899346	1.00277	0.677187	0.345121	0.163658	0.118078	1	0.95922	1.00217	0.984992	0.776007	0.362263	0.133033	0.0861295	1	0.853712	0.826754	1.07373	0.7006	0.317725	0.126371	0.152125	13.4314	-0.145324	0.0424343	0.988949	13.3892	-0.141873	0.0615201	0.97123	13.8703	-0.15404	0.0221919	0.99823	13.257	-0.17819
O60347	TBC1D12	5	2	1	0.992098	1.05049	0.983939	0.579508	0.244434	0.150739	0.0915971	1	1.01534	0.91487	0.908178	0.539301	0.220918	0.0834428	0.0582027	1	0.962597	0.991443	0.943269	0.59554	0.234515	0.111793	0.073698	1	1.18254	1.26075	1.18254	0.661891	0.247044	0.184042	0.0901656	12.5349	-0.172325	0.0842464	0.997128	12.219	-0.151581	0	0.99364	12.5905	-0.158889	0.028066	0.998652	12.8255	-0.221209
O60353	FZD6	7	7	1	1.03865	1.03121	1.03012	0.631241	0.342821	0.180174	0.0595943	1	1.00223	0.99288	1.07682	0.69023	0.298115	0.145854	0.06896	1	1.03695	1.04972	0.990651	0.568595	0.324079	0.15468	0.0705842	1	0.999216	1.11348	1.04753	0.677163	0.312361	0.156396	0.0600432	13.2974	-0.133394	0.00220767	0.991128	13.2751	-0.168028	0.0540702	0.992276	12.8335	-0.135931	0.0187346	0.99204	13.3178	-0.153375
O60361	NME2P1	2	1	1	0.984166	1.18017	1.11233	1.15186	1.31194	1.71446	1.53653	1	0.830825	0.886916	0.84063	0.98321	0.874483	0.913266	1.30624	1	0.97647	1.0991	1.13141	1.33528	0.920435	1.20614	1.24645	1	1.23403	1.13305	1.08535	1.25964	0.845443	0.992624	1.07602		0.116468	1.5	0.762493						0.0590523	1.17192	0.319754
O60427	FADS1	7	14	1	0.986951	1.02214	0.895651	0.508213	0.166872	0.0634513	0.0348913	1	0.962	1.03036	0.928616	0.499599	0.168137	0.0801336	0.0394407	1	1.03145	1.02251	0.935227	0.490527	0.167729	0.0736682	0.0389767	1	1.01866	1.04671	0.927867	0.508212	0.171943	0.0738557	0.0369415	11.9436	-0.168171	0	0.998647	11.9801	-0.175156	0.0106352	0.998181	11.9471	-0.179405	0.0132558	0.998935	12.0305	-0.172568
O60437	PPL	26	26	1	1.00193	1.0237	1.02389	0.704448	0.457725	0.225936	0.0589644	1	0.992025	0.995676	1.05814	0.70663	0.3647	0.254188	0.144847	1	1.01199	1.0125	1.01599	0.73684	0.374642	0.198843	0.0950745	1	1.0521	1.14523	1.0758	0.73412	0.363834	0.231216	0.153296	14.15	-0.120522	0	0.9897	13.6297	-0.144132	0.138773	0.991574	13.8726	-0.135191	0.0310222	0.997966	13.6866	-0.154097
O60443	DFNA5	8	7	1	0.999236	1.05155	1.06361	0.735764	0.43658	0.215615	0.0812203	1	1.07009	1.05111	1.0367	0.719943	0.354552	0.15217	0.0379578	1	1.01209	1.13399	1.12589	0.784451	0.440365	0.200973	0.119801	1	1.04886	1.01619	1.03278	0.727491	0.357085	0.159901	0.0492171	14.2289	-0.125606	0	0.988852	13.6743	-0.147291	0	0.990613	14.3688	-0.138728	0.0532455	0.968756	13.7312	-0.144741
O60447	EVI5	7	10	1	1.00801	0.98275	0.957631	0.463643	0.113231	0.053605	0.0256747	1	1.03154	1.03236	0.904764	0.524308	0.156469	0.0870609	0.0489178	1	1.01582	1.00673	0.910858	0.487267	0.123825	0.0441357	0.0262853	1	0.98492	1.02468	0.903256	0.46812	0.16104	0.0774928	0.0660101	11.8189	-0.220496	0.0185122	0.9997	12.0324	-0.16854	0.0053829	0.997212	11.8393	-0.190297	0	0.998911	11.7436	-0.173889
O60476	MAN1A2	10	13	1	1.00647	1.01554	0.97322	0.571489	0.155434	0.0515073	0.0294416	1	1.02011	1.0105	0.992834	0.584629	0.191015	0.0751413	0.0391595	1	1.02919	1.04007	0.982145	0.579331	0.186705	0.06032	0.0252111	1	0.991818	1.07545	0.998519	0.572356	0.197397	0.0692101	0.0357437	12.351	-0.206675	0.0116102	0.999799	12.4768	-0.194057	0.0246248	0.999295	12.4557	-0.188617	0.00255453	0.998167	12.4435	-0.190484
O60487	MPZL2	1	1	1	1.09496	1.15983	1.12459	1.01031	0.824299	1.05567	0.939155	1	0.913069	0.995277	1.03292	0.717569	0.532468	0.374314	0.145412	1	0.951119	1.00494	0.917963	0.995341	0.686885	0.717347	0.716728	1	0.983084	1.27637	1.15485	0.750856	0.465443	0.409589	0.338801		-0.0434557	0.940052	0.0643216	15.1225	-0.0922266	0	0.969562		-0.798234	0.706987	0.930312	14.1228	-0.154412
O60488	ACSL4	34	38	1	1.02421	0.999584	0.943934	0.585715	0.218383	0.070794	0.0322896	1	1.01095	0.990475	0.980253	0.588263	0.23829	0.0918698	0.027824	1	1.00758	0.948857	0.937652	0.716602	0.239256	0.0862376	0.0410331	1	1.00221	0.997433	0.952876	0.583545	0.236432	0.0891464	0.0329757	12.5111	-0.168131	0	0.999294	12.6235	-0.164439	0	0.999092	13.1574	-0.181745	0.00794815	0.995968	12.561	-0.16066
O60493	SNX3	8	8	1	0.972197	1.06487	1.01583	0.818178	0.602364	0.195032	0.0345708	1	0.993401	1.01872	0.986354	0.78173	0.51604	0.287484	0.0807116	1	0.969893	0.984798	1.06047	0.910449	0.575486	0.22256	0.0446111	1	0.923125	0.971018	0.924358	0.84512	0.561348	0.277871	0.0992391	15.2831	-0.14728	0	0.980867	14.8926	-0.113881	0	0.992565	15.443	-0.158002	0	0.993646	15.3322	-0.119794
O60499	STX10	7	9	1	0.998956	0.982481	1.00539	0.822882	0.731836	0.638451	0.323934	1	0.973007	1.04724	1.03578	0.738787	0.508098	0.418515	0.267299	1	1.09465	1.02712	1.04124	0.847146	0.664099	0.519436	0.319194	1	1.03306	1.06129	1.06425	0.813687	0.491703	0.417015	0.269011	18.8159	-0.0632402	0	0.947798	15.1728	-0.0946141	0.215243	0.982057	17.6712	-0.0708507	0	0.971373	15.1354	-0.113381
O60502	MGEA5	40	42	1	0.971478	0.946918	0.914116	0.593018	0.19873	0.039657	0.0137429	1	1.00486	1.0263	0.935013	0.593482	0.224978	0.0665266	0.0210927	1	0.998054	0.988851	0.95579	0.613975	0.230239	0.0662131	0.0193308	1	0.97295	0.966927	0.926148	0.58877	0.230584	0.0709345	0.0207794	12.4614	-0.180006	0	0.994503	12.5469	-0.168469	0	0.998564	12.6799	-0.172836	0	0.999344	12.5222	-0.16406
O60503	ADCY9		5									1	1.01076	1.10159	0.950517	0.610545	0.337091	0.244348	0.17579									1	1.01028	1.02786	1.09231	0.714422	0.352148	0.225171	0.155126					12.9795	-0.131985	0.14543	0.989262					13.5166	-0.16029
O60504	SORBS3	15	12	1	1.01822	0.971917	0.968882	0.793157	0.805461	0.837513	0.673244	1	1.10242	0.996712	1.00703	0.734991	0.616136	0.671104	0.670431	1	0.987231	0.980673	1.00495	0.842731	0.675889	0.647356	0.59532	1	0.988557	1.05829	1.05751	0.8475	0.591939	0.594177	0.57266		-0.02151	0	0.855429		-0.851767	0.652557	0.9526		-0.0741137	0.600891	0.993142		-0.189737
O60506-3	SYNCRIP	52	1	1	1.02243	0.993682	0.995832	0.753834	0.508559	0.115417	0.0329295	1	1.05676	1.00379	0.894765	0.606794	0.411286	0.202501	0.000588181	1	1.02016	1.04305	1.01014	0.662346	0.478622	0.150901	0.0420068	1	0.996624	0.893138	0.927536	0.711142	0.379679	0.161541	0.0515595	14.366	-0.142981	0	0.984272	13.1631	-0.117833	0	0.979755	13.8617	-0.126272	0	0.980707	13.6511	-0.13239
O60506	SYNCRIP		59									1	1.02282	1.04609	0.994885	0.695041	0.437925	0.206842	0.0565377									1	1.0582	1.06538	1.03792	0.716099	0.425642	0.204813	0.0654978					13.9536	-0.122438	0	0.991263					14.0441	-0.126903
O60507	TPST1	3	4	1	1.02951	1.08934	1.06622	0.650431	0.443261	0.407827	0.357004	1	0.963324	1.0714	1.04691	0.638669	0.265173	0.0939029	0.0121622	1	1.10297	1.09531	1.15789	0.598203	0.431508	0.330405	0.235221	1	1.00055	0.991386	0.983683	0.65712	0.2771	0.0863336	0.00845988	13.115	-0.200209	0.392578	0.977746	12.9651	-0.170699	0	0.990597	12.7845	-0.196427	0.309868	0.940799	13.0278	-0.166568
O60508	CDC40	6	4	1	1.03635	0.970793	0.969792	0.542631	0.176574	0.0828796	0.0610756	1	0.981558	1.0292	0.914633	0.540171	0.216304	0.058066	0.0251174	1	1.02049	0.963488	0.923513	0.595939	0.199803	0.0764534	0.0556219	1	1.08676	0.995884	0.856142	0.456994	0.192957	0.070275	0.0271124	12.2311	-0.197776	0.045066	0.998397	12.2249	-0.163735	0	0.997898	12.4977	-0.166214	0.000897389	0.997396	11.6087	-0.15518
O60512	B4GALT3	3		1	0.966288	0.962628	0.984465	0.770437	0.593476	0.307275	0.0983862									1	1.09059	1.13448	1.14466	0.846914	0.548408	0.336439	0.15499									15.311	-0.1072	0	0.981184					15.5916	-0.110718	0.0177731	0.950357
O60513	B4GALT4	2	4	1	1.05538	1.04124	0.964512	0.859162	0.534464	0.301929	0.0927623	1	0.934926	1.02111	0.905621	0.716519	0.421533	0.215707	0.0835895	1	1.06602	1.06745	1.16174	1.02792	0.441613	0.263708	0.169007	1	0.989049	1.149	1.0467	0.702405	0.422999	0.224461	0.0778652	15.3189	-0.12007	0	0.990967	13.9112	-0.115304	0	0.989855	14.7979	-0.333064	0.211798	0.965846	14.0362	-0.122087
O60518	RANBP6	10	11	1	1.0295	0.985918	0.995114	0.629595	0.235566	0.0616028	0.0338162	1	0.979844	1.01684	0.964297	0.590308	0.288426	0.0949386	0.0314164	1	0.989056	1.02056	1.00932	0.710561	0.283159	0.0829514	0.0345125	1	0.967227	0.964103	0.964171	0.630618	0.291188	0.0860744	0.048371	12.795	-0.177026	0	0.99852	12.7385	-0.150872	0	0.997465	13.2959	-0.172353	0	0.998879	12.9361	-0.153071
O60524	NEMF	29	37	1	1.02481	1.02385	0.960189	0.573513	0.279172	0.119532	0.0217877	1	1.0058	1.00715	0.9381	0.570906	0.262083	0.140371	0.0700784	1	0.989868	0.992412	0.8946	0.527564	0.247956	0.100024	0.0302194	1	1.01925	1.05088	0.956697	0.583972	0.243293	0.124207	0.0570219	12.6468	-0.148061	0	0.996906	12.564	-0.14206	0.015714	0.999712	12.1889	-0.145417	0	0.998566	12.5914	-0.155105
O60547	GMDS	2		1	0.971897	1.16919	1.12332	0.519308	0.280102	0.151821	0.0518427									1	0.946703	0.98729	0.815093	0.535287	0.182582	0.0541078	0.0316214									12.3312	-0.202269	0.107514	0.957324					11.8145	-0.150068	0	0.988895
O60551	NMT2	8	13	1	0.984143	0.993133	0.990006	0.661387	0.199426	0.0619608	0.0302513	1	0.968963	0.956866	0.865948	0.59036	0.289533	0.157987	0.107868	1	1.02263	1.02792	1.03114	0.538238	0.258995	0.0848951	0.0412512	1	1.00212	0.992111	0.882199	0.56571	0.270235	0.163273	0.109866	12.8264	-0.198813	0.00929758	0.999763	12.5904	-0.119373	0	0.995968	12.4557	-0.171746	0.0259712	0.992395	12.457	-0.124669
O60563	CCNT1	11	8	1	0.979307	1.0276	0.929865	0.550322	0.201324	0.0730138	0.0342845	1	0.996558	1.00719	0.976833	0.561889	0.20657	0.0715923	0.0325349	1	1.00726	0.982955	0.904387	0.578445	0.203463	0.0707754	0.0374884	1	0.98295	1.03007	0.906696	0.53849	0.195024	0.0687469	0.0238056	12.2857	-0.166503	0	0.998904	12.4145	-0.176094	0.00405087	0.999545	12.3797	-0.163438	0	0.997999	12.1668	-0.165287
O60566-3	BUB1B	33	37	1	0.999507	0.995429	0.942874	0.558942	0.237521	0.157565	0.0939369	1	0.979249	0.994177	0.956167	0.595385	0.234456	0.134576	0.0852997	1	1.00672	1.00752	0.931953	0.582665	0.229017	0.128239	0.0870078	1	0.996579	1.01477	0.952108	0.583466	0.236563	0.122658	0.0802443	12.3959	-0.157623	0.0707486	0.999582	12.586	-0.165524	0.0587114	0.999488	12.4908	-0.157241	0.0444068	0.999532	12.5365	-0.161471
O60568	PLOD3	22	32	1	1.02957	1.04391	1.0587	0.80076	0.611692	0.335887	0.0536096	1	0.994516	1.02082	1.05405	0.76411	0.496675	0.346169	0.0705982	1	1.03551	1.04046	1.03906	0.845647	0.536296	0.338447	0.0812371	1	1.01223	1.11499	1.06292	0.768764	0.45509	0.334893	0.158057	15.6101	-0.117884	0	0.972603	14.9251	-0.109147	0	0.978315	15.4011	-0.116788	0	0.986124	14.6968	-0.111575
O60573	EIF4E2	12	9	1	0.909358	0.98057	0.958599	0.640208	0.278277	0.117043	0.0313771	1	0.957123	0.962483	1.01233	0.62264	0.266117	0.151446	0.0455486	1	0.97516	0.979496	0.931434	0.634229	0.271345	0.13824	0.0448142	1	0.999797	0.989063	0.969912	0.611615	0.257985	0.128589	0.042653	12.9636	-0.152376	0	0.992147	12.8944	-0.158848	0.0311894	0.993889	12.9007	-0.143952	0	0.998184	12.8029	-0.151087
O60583	CCNT2	7	6	1	1.02061	1.0023	0.859584	0.441654	0.186531	0.0857518	0.0558711	1	1.03526	1.02517	0.903988	0.401856	0.136044	0.0648844	0.0179809	1	0.98241	0.930723	0.856946	0.484876	0.17501	0.0911367	0.0505757	1	1.05047	0.973348	0.815523	0.390828	0.143984	0.0561831	0.0361648	11.5531	-0.15222	0	0.999628	11.4374	-0.187401	0.00625204	0.998512	11.7136	-0.150832	0	0.995007	11.093	-0.163695
O60610	DIAPH1	60	75	1	0.993336	0.984252	0.972424	0.646826	0.192998	0.0285573	0.0169247	1	0.983372	0.990622	0.95534	0.647099	0.244436	0.0646323	0.0448248	1	1.01077	1.00717	1.02089	0.641506	0.222817	0.0479593	0.0184995	1	0.988247	0.998497	0.985759	0.686264	0.251007	0.0705035	0.0395038	12.736	-0.203366	0	0.999241	12.8688	-0.170123	0	0.999057	12.8144	-0.190698	0	0.998268	13.0811	-0.177217
O60613	2021-09-15	8	6	1	0.967389	0.957476	0.998696	0.750018	0.460281	0.219123	0.111521	1	1.01202	1.05288	1.03199	0.7546	0.439575	0.213488	0.074512	1	1.01167	1.13963	1.09856	0.903758	0.50553	0.245113	0.115805	1	0.987088	1.04004	0.988559	0.777226	0.416152	0.189648	0.0778195	14.3781	-0.117952	0	0.995089	14.286	-0.127259	0	0.99308	15.1084	-0.147856	0.062981	0.973412	14.2096	-0.133489
O60637	TSPAN3	2	1	1	0.978183	1.00887	1.04978	0.876289	0.914426	0.917528	0.767266	1	1.07176	1.03781	1.07053	0.827202	0.651759	0.752878	0.750429	1	1.0313	1.17778	1.1586	1.14976	0.82753	0.736445	0.775691	1	0.966598	0.995876	1.05312	0.821488	0.600234	0.656121	0.646021		-0.0179777	0	0.719385		-0.566523	0.718355	0.908193		-0.602263	0.756068	0.643656		-0.883814
O60645	EXOC3	18	20	1	0.99401	0.927527	0.751135	0.326396	0.0460955	0.0193583	0.0168645	1	1.00221	0.982771	0.804458	0.3623	0.0584764	0.0217609	0.0148893	1	0.97288	0.928821	0.763607	0.306512	0.0603311	0.0249919	0.0186459	1	1.01419	0.940577	0.785506	0.310195	0.0702275	0.0248575	0.0135757	10.4688	-0.18849	0	0.992783	10.8407	-0.190558	0	0.996497	10.4752	-0.191471	0	0.994602	10.5874	-0.193642
O60658	PDE8A	4		1	0.986765	0.994439	0.945358	0.571937	0.214176	0.110433	0.0690787									1	1.00815	0.99573	0.930151	0.443181	0.224955	0.101498	0.099891									12.4253	-0.166728	0.0356181	0.999741					11.7277	-0.176737	0.0795967	0.998478
O60663-3	LMX1B		1									1	1.06331	1.05317	0.875643	0.704281	0.423211	0.383462	0.364641									1	1.1422	1.11743	1.12941	0.863247	0.409002	0.419632	0.411393					14.347	-0.0920422	0.281271	0.979996					12.2994	-1.44955
O60664-2	PLIN3	3		1	0.964046	0.938698	1.01521	0.87898	0.957639	0.509397	0.0610576									1	1.08272	1.0585	1.10881	1.03659	0.81612	0.536089	0.114947									18.0203	-0.254841	0	0.974403					17.8431	-0.151128	0	0.959862
O60664-3	PLIN3	38	2	1	0.989464	1.04935	1.07752	0.898167	0.853352	0.569747	0.0927342	1	0.984344	1.08653	1.19791	0.867188	0.579823	0.368791	0.0418136	1	1.0039	1.0568	1.05578	0.915273	0.756396	0.498679	0.113416	1	0.992772	1.03438	1.14649	0.876005	0.572431	0.325442	0.0637697	18.1077	-0.176937	0	0.96075	15.7615	-0.125581	0	0.940606	17.3422	-0.126881	0	0.971756	15.6338	-0.128483
O60664	PLIN3		46									1	0.98809	1.011	1.02153	0.847525	0.678753	0.546769	0.100789									1	1.01054	1.05124	1.05441	0.89799	0.646016	0.510589	0.133148					16.9899	-0.101335	0	0.94089					16.8549	-0.101666
O60669	SLC16A7	1	2	1	1.13327	1.13033	1.02229	0.604201	0.180602	0.0435701	7.46599e-05	1	0.935662	0.974494	0.866219	0.472023	0.157976	0.0400024	0.00397496	1	1.10311	1.13409	1.07852	0.591211	0.208264	0.0764873	0.0276624	1	1.01134	0.977345	0.929572	0.499853	0.171536	0.050056	0.0278062	12.5616	-0.206571	0	0.978624	11.6611	-0.171326	0	0.993881	12.5629	-0.204122	0.0317167	0.97609	11.9894	-0.178271
O60671	RAD1	7	5	1	0.991878	1.02526	0.99686	0.737941	0.454461	0.296681	0.15496	1	0.920728	0.971465	0.92312	0.666082	0.402734	0.254683	0.131004	1	1.00679	1.02513	0.998249	0.770935	0.415599	0.253814	0.155977	1	0.980895	0.929021	0.976017	0.76941	0.424145	0.242503	0.117147	14.5404	-0.102915	0.0130977	0.996481	13.7232	-0.103162	0	0.990799	14.2275	-0.127356	0.0969287	0.998572	14.3449	-0.116939
O60673	REV3L	1		1	0.925524	0.851657	0.889546	0.406853	0.0829581	0.0324153	0									1	1.11221	1.085	1.24191	0.695055	0.119808	0	0									11.378	-0.203378	0	0.978456					12.7303	-0.285511	0	0.959949
O60674	JAK2		2									1	1.06158	1.04195	0.862469	0.49398	0.174681	0.144505	0.175854									1	1.24819	1.17995	1.09015	0.480951	0.274787	0.150618	0.132258					11.6862	-0.160665	0.109253	0.989849					11.9869	-0.264279
O60678	PRMT3	14	15	1	1.02585	1.01886	0.95353	0.463925	0.11449	0.0437786	0.0226627	1	1.0341	0.991547	0.868456	0.432124	0.149125	0.0737922	0.0377302	1	1.03119	1.03813	0.939145	0.430653	0.132822	0.0465239	0.0209698	1	0.997513	0.8944	0.858724	0.431169	0.143903	0.0750478	0.0464362	11.8164	-0.215447	0.00988714	0.999321	11.478	-0.166052	0	0.998963	11.6497	-0.201126	0.00796454	0.998308	11.4228	-0.162896
O60684	KPNA6	15	14	1	1.00651	1.05489	0.979999	0.595209	0.230914	0.0835624	0.0310282	1	0.947905	0.955738	0.918426	0.594648	0.218311	0.0623893	0.0230362	1	0.958677	1.03245	1.01758	0.597545	0.246752	0.0993118	0.0369278	1	1.00346	0.94587	0.943762	0.628299	0.224384	0.07334	0.0291342	12.6334	-0.168317	0	0.997387	12.5134	-0.168192	0	0.994581	12.7068	-0.169823	0.0155405	0.99528	12.7277	-0.171691
O60701	UGDH	42	43	1	0.954809	0.93213	0.889047	0.570926	0.245183	0.0724338	0.0174758	1	0.98069	0.994073	0.935715	0.573169	0.28651	0.163758	0.03248	1	1.01758	0.965774	0.901827	0.611007	0.313821	0.123245	0.0352467	1	0.992084	0.959943	0.898647	0.590251	0.305437	0.173579	0.0505849	12.3796	-0.153062	0	0.990878	12.6651	-0.135478	0	0.996975	12.8207	-0.135768	0	0.995292	12.7308	-0.12585
O60704	TPST2		2									1	1.11963	1.08438	1.04772	0.701348	0.380016	0.195659	0.149396									1	1.15879	1.19193	1.07308	0.726033	0.390094	0.236189	0.136448					13.6425	-0.141815	0.106036	0.977142					13.8737	-0.13812
O60716-3	CTNND1		37									1	1.00653	0.946293	0.866429	0.432168	0.101057	0.0432633	0.0261713									1	0.980717	0.983105	0.879327	0.426945	0.115552	0.0435824	0.026696					11.4142	-0.183556	0	0.996258					11.4508	-0.183991
O60716	CTNND1	47		1	1.00244	0.983619	0.860387	0.401846	0.0763814	0.0292482	0.0222249									1	0.955001	0.95241	0.795592	0.381978	0.0838542	0.029458	0.0246162									11.244	-0.194178	0	0.997797					10.8966	-0.17775	0	0.993791
O60725	ICMT	1	3	1	0.97658	0.92426	0.777748	0.52072	0.153142	0.056431	0.00561818	1	1.03768	0.9751	0.730824	0.395377	0.113314	0.0355386	0.00481471	1	1.01748	1.08644	1.02899	0.550656	0.194059	0.0823171	0.0249214	1	0.988473	0.62355	0.689889	0.358983	0.10778	0.0279001	0.00732889	11.5041	-0.149398	0	0.981474	10.6864	-0.161628	0	0.992869	12.3512	-0.19996	0.0305363	0.991839	8.83236	-0.12923
O60733	PLA2G6	4	2	1	0.940054	0.849125	0.811293	0.353473	0.0605029	0.0547709	0.0222474	1	0.941762	1.01036	0.905368	0.50549	0.230897	0.0978835	0.0494163	1	0.996978	0.903299	0.816071	0.42127	0.100732	0.0559466	0.0237206	1	1.03661	1.18077	1.0189	0.595912	0.212224	0.127797	0.0725625	10.8289	-0.185985	0	0.977644	12.0785	-0.147983	0	0.996907	11.1563	-0.169367	0	0.990014	12.5333	-0.201566
O60749	SNX2	24	26	1	0.999383	0.999513	1.02658	0.785423	0.325407	0.0764988	0.0192235	1	0.980553	1.02197	1.00245	0.753715	0.405323	0.0878743	0.0178652	1	1.01724	0.970317	0.983547	0.799043	0.396781	0.0878719	0.0232188	1	0.986168	1.00287	0.98396	0.745302	0.400425	0.0899143	0.0152889	13.7265	-0.181928	0	0.998431	13.8934	-0.158628	0	0.993413	14.0481	-0.16819	0	0.99612	13.83	-0.156797
O60762	DPM1	19	17	1	0.971737	0.915522	0.828577	0.41743	0.110033	0.0372537	0.0203896	1	0.994303	0.951332	0.857471	0.412087	0.0955645	0.0257852	0.0150167	1	1.01928	0.982854	0.881579	0.392466	0.128503	0.051126	0.0222844	1	1.03192	0.99222	0.8598	0.397492	0.109311	0.0344374	0.0198819	11.2032	-0.174015	0	0.991778	11.2893	-0.188327	0	0.99646	11.3227	-0.183743	0	0.999548	11.2486	-0.185447
O60763-2	USO1		65									1	1.03457	1.0358	0.867374	0.494043	0.136479	0.0352142	0.0151028									1	0.999876	0.925056	0.861773	0.471307	0.141368	0.0358157	0.0175434					11.7575	-0.176975	0	0.99504					11.618	-0.172823
O60763	USO1	51	2	1	0.972698	0.968402	0.862395	0.489453	0.117009	0.0372282	0.0257223	1	1.07484	1.32802	0.864903	0.614511	0.306305	0.138168	0.101879	1	0.981131	0.967446	0.876034	0.495487	0.138272	0.0420277	0.0212709	1	0.87759	0.909359	0.878581	0.459914	0.250883	0.0752394	0.038848	11.6926	-0.178313	0	0.994593	12.7871	-0.124174	0	0.920508	11.7895	-0.176358	0	0.996361	11.7937	-0.14544
O60765	ZNF354A	2	1	1	1.07807	1.10958	0.929354	0.553134	0.358541	0.307682	0.196319	1	1.08141	1.11381	1.04786	0.615652	0.300406	0.106005	0.121942	1	0.9025	0.93594	0.897277	0.58725	0.26917	0.260428	0.184612	1	0.968509	1.29351	0.906941	0.339696	0.270103	0.175355	0.0735718	12.6966	-0.127111	0.200227	0.97761	12.8536	-0.171635	0.0871118	0.979143	12.5428	-0.132828	0.149969	0.978832	11.1467	-0.202832
O60779	SLC19A2	1		1	1.30146	1.24973	1.23566	0.942143	0.539599	0.542955	0.219225									1	1.07906	1.02425	1.01247	0.635834	0.401461	0.250697	0.120502									16.622	-0.0972745	0.154147	0.780821					13.6372	-0.114666	0.042622	0.985847
O60783	MRPS14	2	2	1	1.14161	1.33818	1.21858	0.878237	0.482602	0.238818	0.0548458	1	0.855109	0.917044	0.956393	0.696571	0.363025	0.201985	0.0916278	1	0.981113	1.05264	1.12643	0.724628	0.352145	0.139902	0.085151	1	0.889587	1.02103	0.928211	0.710845	0.393626	0.200593	0.0683468	14.9863	-0.146222	0	0.883163	13.6415	-0.12264	0	0.96945	13.646	-0.159013	0.0459791	0.981257	13.7711	-0.12272
O60784	TOM1	6	4	1	0.958552	1.005	1.01123	0.907941	0.940188	0.901035	0.425428	1	1.14544	1.12141	1.1936	0.81062	0.699314	0.774051	0.578515	1	1.04259	0.976589	1.01801	0.7906	0.798045	0.760578	0.50599	1	1.11698	1.15246	1.18456	0.857555	0.673191	0.654984	0.535671	20.5852	-0.18488	0	0.948712		-0.187424	0.683593	0.749813		-0.037892	0	0.880641		-0.0829738
O60825	PFKFB2	10	17	1	0.993908	1.02735	1.04211	0.860625	0.648644	0.482356	0.254646	1	0.985591	1.00299	1.01826	0.749871	0.487698	0.393845	0.225541	1	1.04915	1.04479	1.0436	0.898784	0.582205	0.411041	0.234365	1	0.997098	1.03336	1.02464	0.795613	0.454712	0.343519	0.217863	17.0604	-0.0822218	0	0.987465	15.0527	-0.0945685	0.134289	0.989499	16.1964	-0.101556	0.11897	0.986993	14.6592	-0.119786
O60826	CCDC22	13	14	1	0.953616	1.0018	1.02717	0.779864	0.337012	0.16186	0.111698	1	1.00581	1.01575	0.980101	0.716787	0.393453	0.121222	0.0461886	1	1.03329	1.07634	1.0693	0.803716	0.403264	0.124655	0.0875834	1	1.02345	1.0246	1.00113	0.726667	0.370867	0.108904	0.0646509	13.735	-0.170128	0.0858913	0.996963	13.7231	-0.142958	0	0.996373	14.1587	-0.157847	0.0190874	0.98884	13.6928	-0.14828
O60828	PQBP1	7	11	1	1.01406	1.04	1.079	0.840338	0.950414	0.953322	0.780972	1	1.00628	0.971027	1.06244	0.786389	0.59971	0.589034	0.56816	1	0.979525	1.02057	1.13971	0.966414	0.719474	0.691024	0.702968	1	1.08146	1.11145	1.15464	0.863713	0.588308	0.551801	0.49871		-0.016928	0	0.525122		-0.168487	0.582237	0.983533		-0.122409	0.696721	0.901578		-0.124713
O60830-2	TIMM17B		1									1	1.47653	1.82292	0.958225	0.544102	0.243077	0.195728	0.082648									1	0.939498	0.823312	0.872436	0.521409	0.170192	0	0					12.3485	-0.164862	0.0971773	0.678306					11.9579	-0.179691
O60831	PRAF2	3	3	1	1.13656	1.096	1.04481	0.796995	0.547084	0.30501	0.109899	1	1.00646	1.09495	1.1064	0.741126	0.408537	0.296682	0.197195	1	1.13409	1.0718	1.07852	0.842444	0.495497	0.281873	0.138421	1	1.06415	1.09839	1.03098	0.741697	0.383906	0.275895	0.173305	15.2301	-0.11125	0	0.965913	13.9673	-0.141986	0.198806	0.974375	15.0399	-0.123656	0.0501736	0.970841	13.8749	-0.139915
O60832	DKC1	21	22	1	0.991904	0.931409	0.864577	0.603303	0.491899	0.456413	0.302656	1	1.01061	1.01478	0.906556	0.559756	0.349951	0.298071	0.244914	1	0.986292	0.949697	0.846034	0.640585	0.393242	0.33672	0.250035	1	1.00393	0.978816	0.88852	0.557518	0.333055	0.258223	0.206775	14.9476	-0.0638435	0	0.983371	12.6191	-0.126687	0.224021	0.999105	13.7264	-0.0800424	0.0180372	0.994171	12.5779	-0.119159
O60841	EIF5B	54	75	1	1.00939	0.945384	0.855358	0.42858	0.114399	0.0318618	0.0186591	1	0.97252	0.950815	0.819873	0.411327	0.119438	0.0353554	0.0215038	1	0.997508	0.93749	0.825171	0.420548	0.114914	0.0365337	0.0194301	1	0.968921	0.934815	0.820532	0.40093	0.119113	0.0444237	0.0250319	11.3682	-0.180176	0	0.996046	11.1547	-0.171365	0	0.995528	11.2098	-0.172388	0	0.99468	11.1141	-0.170785
O60858-3	TRIM13	3	2	1	0.988448	1.05823	1.08456	0.71868	0.281468	0.09793	0.0144198	1	0.933669	1.01153	0.97099	0.679605	0.289839	0.110326	0.041013	1	1.02638	1.08014	1.07873	0.749645	0.268825	0.090278	0.0252402	1	1.07455	1.10746	1.08699	0.711963	0.292433	0.137228	0.0636231	13.3586	-0.177852	0	0.990377	13.189	-0.156218	0	0.996114	13.4163	-0.188999	0.00672406	0.989966	13.3384	-0.174536
O60869	EDF1	10	9	1	0.922147	0.946515	0.902065	0.654301	0.585019	0.514668	0.375535	1	0.896765	0.8818	0.815412	0.539876	0.311435	0.250801	0.242469	1	0.954472	0.893512	0.862159	0.677326	0.418755	0.313457	0.313924	1	0.947721	0.879579	0.800605	0.573505	0.280064	0.202642	0.210548	17.0905	-0.0538787	0	0.964053	12.2814	-0.097935	0.08664	0.966168	14.0701	-0.0802945	0.0976225	0.972382	12.269	-0.0970549
O60870	KIN	8	16	1	1.01879	0.959851	0.850967	0.426033	0.146898	0.0514142	0.0469493	1	1.01691	0.976705	0.830131	0.411564	0.127225	0.049197	0.039503	1	0.966537	0.969375	0.853855	0.456752	0.13572	0.0651603	0.0419449	1	0.985396	0.936968	0.79226	0.407079	0.131499	0.0556305	0.0315688	11.3768	-0.165658	0	0.997974	11.2128	-0.168217	0	0.998339	11.5144	-0.164973	0	0.996897	11.0352	-0.160181
O60879	DIAPH2	16	19	1	0.990754	0.999206	0.916132	0.469369	0.137032	0.0616981	0.038249	1	1.05884	1.02364	0.954086	0.511749	0.145771	0.0644368	0.0420938	1	1.00106	1.01153	0.948692	0.47405	0.151772	0.0697471	0.0356784	1	1.04558	1.06829	0.957831	0.493392	0.146542	0.0671392	0.0439531	11.7718	-0.183978	0.00632973	0.999685	12.0476	-0.201635	0.0240098	0.997252	11.8716	-0.194878	0.0227018	0.99984	11.9666	-0.20444
O60884	DNAJA2	21	23	1	0.991136	0.949721	0.916018	0.575676	0.226778	0.0651156	0.0199851	1	1.02702	1.01571	0.923294	0.564893	0.229394	0.0719656	0.0168459	1	1.03851	1.00545	0.974376	0.627957	0.244571	0.0831356	0.0386819	1	1.00182	0.946889	0.894777	0.567872	0.23429	0.0736778	0.025311	12.428	-0.163262	0	0.996285	12.3955	-0.162142	0	0.998041	12.8104	-0.166378	0	0.998752	12.3571	-0.154709
O60885	BRD4	14	20	1	0.985963	1.03478	1.06197	0.809396	0.642059	0.445096	0.207269	1	0.978245	1.03078	1.02661	0.76145	0.466366	0.289458	0.13493	1	1.03108	1.10095	1.11159	0.924206	0.56249	0.365612	0.196526	1	0.978265	1.04272	1.03166	0.770974	0.430455	0.246104	0.13289	16.5297	-0.0869877	0	0.977481	14.6892	-0.107783	0	0.993647	15.7914	-0.123134	0.140218	0.969738	14.3478	-0.124984
O60888-2	CUTA	3	4	1	1.06459	1.41375	1.48545	0.966473	0.906684	1.09174	0.828559	1	1.26128	1.29969	1.31234	0.890777	0.671379	0.633281	0.605502	1	0.989776	1.21812	1.19955	0.826389	0.679344	0.600529	0.45331	1	0.997585	1.09817	1.15628	0.931687	0.520943	0.431895	0.440522			0	-0.109267		-0.109386	0.619246	0.60671	20.3518	-0.0710371	0.425085	0.818689	15.2939	-0.177865
O60890	OPHN1	5	2	1	1.01661	1.07062	1.04526	0.694357	0.32898	0.151501	0.0956718	1	0.971655	0.978632	0.961192	0.538708	0.178106	0.0403596	0.0652597	1	0.992473	1.10424	1.03691	0.693698	0.320009	0.145192	0.0966383	1	1.02319	1.04281	0.928904	0.705298	0.215665	0.021726	0.0463422	13.4023	-0.155437	0.0592201	0.991899	12.2129	-0.194119	0.0246512	0.997981	13.3505	-0.158694	0.0613593	0.988496	13.0137	-0.200654
O60906	SMPD2	4	5	1	1.0592	1.05973	0.98552	0.677496	0.300199	0.104524	0.0449924	1	0.98756	0.998822	1.02363	0.664732	0.290041	0.137541	0.0457575	1	1.02649	1.05627	1.09261	0.755915	0.318483	0.121912	0.0408232	1	1.00979	1.05744	0.954191	0.678728	0.319448	0.134242	0.0464178	13.2176	-0.155766	0	0.994336	13.177	-0.155825	0.0124382	0.997133	13.6515	-0.169624	0.0097974	0.989278	13.2865	-0.143947
O60907	TBL1X		16									1	1.01783	1.03674	1.05062	0.817857	0.546353	0.363783	0.0473448									1	1.01063	1.04554	1.01272	0.82482	0.504027	0.316835	0.0650906					15.3922	-0.115273	0	0.975075					15.078	-0.118754
O60909-3	B4GALT2	2	2	1	0.82007	0.794806	0.69014	0.582301	0.461481	0.215715	0.210252	1	1.45418	1.3851	1.03977	0.675165	0.556721	0.426757	0.418517	1	0.95953	1.16504	1.12582	0.886581	0.422492	0.263337	0.168025	1	0.889713	0.815127	0.892816	0.550306	0.351806	0.355468	0.113494	11.8805	-0.0794708	0	0.875558	14.9485	-0.119323	0.426072	0.693866	14.4974	-0.172043	0.172023	0.958412	12.9739	-0.0920666
O60911	CTSV	4		1	0.921443	0.921977	1.05252	0.838647	0.849578	0.946832	0.78015									1	0.961193	1.00192	1.00107	0.941766	0.706066	0.733131	0.683923										-0.0131262	0.279841	0.310075						-0.752637	0.707706	0.981149
O60921	HUS1	10	8	1	0.992748	1.02889	0.972478	0.647342	0.407599	0.323263	0.200468	1	1.02139	1.0532	1.05405	0.664166	0.352564	0.257329	0.197915	1	1.02205	1.01024	1.02367	0.718657	0.403957	0.267259	0.167747	1	1.01084	1.06268	0.975436	0.624871	0.293538	0.204048	0.126829	13.6926	-0.110642	0.161771	0.994291	13.2039	-0.162344	0.206246	0.990428	13.9432	-0.126519	0.127056	0.995716	12.9051	-0.151436
O60925	PFDN1	11	13	1	1.26402	1.39046	1.41413	1.2593	1.34494	1.68087	1.42723	1	1.17656	1.23524	1.24362	0.942163	0.743108	0.844319	0.847151	1	1.18812	1.22596	1.21926	1.29842	1.08427	1.09812	1.03521	1	1.13838	1.10216	1.18908	1.00543	0.726308	0.724672	0.664561			1.5	0.633101		-0.446803	0.811526	0.417954			1.32839	0.308702		-0.210016
O60927	PPP1R11	3	2	1	1.02597	0.940643	0.996503	0.984412	1.08751	1.32637	0.973608	1	0.97531	0.74281	1.15573	1.12291	0.548886	0.686963	0.826682	1	0.734163	0.915253	0.989826	0.974022	0.856664	1.01306	0.866515	1	0.824471	1.07358	1.21756	0.801163	0.582741	0.475345	0.640363		0.351065	1.14999	0.36679		-0.534758	0.847331	0.0912472			0.907018	0.117568		-0.223547
O60930	RNASEH1	6	1	1	1.03971	1.03302	0.906614	0.569431	0.285127	0.137442	0.095005	1	1.05881	0.981625	0.900329	0.601985	0.185994	0.107923	0.0450989	1	0.922968	0.973494	0.957297	0.969012	0.255982	0.132031	0.0846453	1	0.996386	1.09539	0.979934	0.665654	0.24055	0.104055	0.0704131	12.5722	-0.129107	0.00152229	0.997524	12.4719	-0.160124	0	0.993742	14.0247	-0.339603	0.103449	0.992501	12.9326	-0.180665
O60931-2	CTNS	1	1	1	1.22391	0.968569	0.834203	0.707105	0.453844	0.272974	0.0721301	1	0.935744	1.09185	0.690844	0.675914	0.364058	0.215148	0.142974	1	0.867803	1.11543	0.990225	0.530357	0.361723	0.261919	0.0991867	1	0.928532	0.917544	0.90872	0.606634	0.366683	0.283676	0.0971979	13.9182	-0.100809	0	0.934089	12.7043	-0.0930568	0	0.945232	12.7647	-0.129663	0.108785	0.954665	13.2486	-0.102639
O60934	NBN	13	6	1	1.04275	1.11161	1.04044	0.688129	0.304297	0.174061	0.0790201	1	1.00248	1.03958	0.984901	0.601244	0.217013	0.0738589	0.02642	1	0.982179	0.999133	1.05172	0.646424	0.277656	0.120778	0.0802368	1	0.990135	1.09604	0.95313	0.615906	0.242395	0.072283	0.0279591	13.2971	-0.159382	0.0645942	0.985273	12.6268	-0.176384	0	0.998548	12.9752	-0.174	0.0610744	0.994912	12.7186	-0.166957
O60936-2	NOL3	7	7	1	0.999645	1.0379	1.03655	0.969352	1.00344	1.18584	0.923976	1	0.918135	0.89079	0.903466	0.748615	0.614476	0.678666	0.676898	1	0.992572	1.04836	1.22419	0.831421	0.841747	0.862648	0.853158	1	0.981537	0.915256	0.904786	0.801933	0.575869	0.596802	0.598028		0.0980477	1.02618	0.0254251		-0.0326626	0	0.842258		-0.0954245	0.845601	0.589839		-0.0615496
O60941	DTNB	9	4	1	0.992426	1.00984	0.981671	0.589501	0.189931	0.0461963	0.0368855	1	1.0302	1.0786	1.00953	0.54165	0.207516	0.0849884	0.0803947	1	1.04321	1.02613	1.00457	0.610837	0.215669	0.0669438	0.0275839	1	1.11257	1.04939	0.910649	0.678048	0.276738	0.125997	0.0438616	12.4974	-0.191656	0.00530964	0.999546	12.2782	-0.203655	0.0693877	0.993384	12.6735	-0.182581	0.00191672	0.997395	13.0975	-0.14879
O60942	RNGTT	15	23	1	1.01652	1.03175	0.996294	0.577133	0.161831	0.0654362	0.0245689	1	1.01031	0.99843	0.929631	0.554681	0.179756	0.0476089	0.0297452	1	1.01443	1.00736	1.00034	0.594153	0.181919	0.0617097	0.026099	1	0.992681	0.982059	0.917311	0.599418	0.20005	0.0638515	0.0361653	12.3938	-0.210209	0.0195497	0.9988	12.2664	-0.1797	0	0.999226	12.5109	-0.199589	0.0123711	0.999363	12.504	-0.17151
O75027-2	ABCB7	12	8	1	1.00368	1.02356	0.899954	0.484999	0.148501	0.0614223	0.0296468	1	0.988316	0.984727	0.928533	0.606532	0.178081	0.119839	0.0707319	1	1.01674	0.980824	0.930028	0.489074	0.152398	0.0649183	0.0323773	1	0.935665	0.986798	0.879102	0.509679	0.184777	0.0759621	0.0499279	11.8201	-0.174913	0	0.999044	12.4975	-0.188182	0.05342	0.997137	11.9153	-0.181852	0.00397047	0.999494	11.9266	-0.155948
O75037	KIF21B		1									1	0.791004	0.7906	0.932039	0.765391	0.38299	0.311348	0.118001									1	0.980964	1.17336	0.893937	0.686139	0.425897	0.274796	0.191075					14.2615	-0.106347	0	0.865892					14.0159	-0.0936208
O75044	SRGAP2	17	19	1	1.00754	1.05024	1.0416	0.62939	0.28582	0.145127	0.0698469	1	0.996798	1.02823	1.00112	0.606217	0.167794	0.0647191	0.0319467	1	1.00798	1.03894	1.00347	0.686436	0.262347	0.126177	0.0614635	1	1.03582	1.05699	0.982391	0.619018	0.185089	0.0611811	0.034797	12.9586	-0.163299	0.0557765	0.993173	12.5189	-0.213982	0.0245194	0.999182	13.1155	-0.173565	0.0412428	0.998238	12.6117	-0.198699
O75051	PLXNA2		1									1	0.974097	0.878335	1.05412	0.665452	0.398553	0.349038	0.319635									1	0.99962	1.06318	1.00809	0.683112	0.356803	0.315001	0.36113					13.1144	-0.189541	0.336859	0.970638					12.7952	-0.270243
O75052	NOS1AP	3	3	1	0.998457	0.970809	0.97119	0.827486	0.685659	0.446433	0.18657	1	1.03549	1.01327	0.929317	0.692594	0.500408	0.362194	0.181567	1	0.987585	1.06655	1.04805	2.03536	0.582268	0.350749	0.175858	1	0.963671	0.963718	0.975098	0.723316	0.489295	0.302186	0.16888	16.7156	-0.0914099	0	0.980511	14.7268	-0.0843726	0	0.992028	15.1774	-0.512495	0.262855	0.520778	14.6683	-0.0957115
O75054	IGSF3	12	12	1	1.04095	1.01888	1.01101	0.776893	0.624063	0.338732	0.0898492	1	0.957237	0.978591	0.962749	0.704263	0.512188	0.337898	0.0879895	1	1.01121	0.9892	0.968956	0.78106	0.547603	0.314883	0.0880759	1	0.989889	1.04421	1.03503	0.812119	0.49273	0.356459	0.0935537	15.6099	-0.107566	0	0.976252	14.6326	-0.098389	0	0.97891	15.1155	-0.108262	0	0.988898	15.1446	-0.109133
O75061-2	DNAJC6	6	3	1	0.931196	0.966537	1.0131	0.852345	0.499477	0.276492	0.130467	1	1.02276	1.0562	1.04346	0.839163	0.384958	0.164383	0.0908027	1	1.1263	1.0454	1.21609	2.21906	0.498788	0.236913	0.159685	1	0.988565	1.0729	0.933393	0.772821	0.454521	0.164172	0.0915438	15.1009	-0.120428	0.0154642	0.992047	14.1968	-0.167674	0.0575793	0.995029	14.9984	-0.796468	0.198282	0.49214	14.2769	-0.129545
O75063	FAM20B	6	9	1	0.945292	0.922055	0.878392	0.570665	0.270117	0.142354	0.0520425	1	0.99739	1.05032	0.967237	0.698552	0.353824	0.168019	0.0609015	1	1.04816	1.04282	0.914165	0.603039	0.315799	0.132251	0.0611388	1	1.0776	0.983484	1.04712	0.717763	0.3416	0.13791	0.0573226	12.4401	-0.131251	0	0.990045	13.5593	-0.134548	0	0.99716	12.8314	-0.131974	0	0.99525	13.6154	-0.14957
O75064	DENND4B	2	2	1	0.977498	0.705864	0.662526	0.622004	0.302684	0.224864	0.126392	1	1.00649	0.87552	1.05852	0.712581	0.256172	0.0173278	0	1	1.07259	0.995022	1.09334	0.986171	0.434829	0.248364	0.132602	1	1.13767	1.03857	0.937907	0.667156	0.229997	0.0699622	0	10.6855	-0.0890996	0	0.896724	13.1686	-0.202157	0	0.983478	14.7272	-0.234523	0.168091	0.983547	12.909	-0.18144
O75071	EFCAB14	4	4	1	0.966853	1.04221	1.04872	0.822795	0.892137	0.898216	0.669309	1	0.918065	0.998453	0.959704	0.739584	0.549879	0.559914	0.60182	1	0.990941	1.05087	1.02132	0.999135	0.733521	0.688342	0.638233	1	0.925719	0.96561	0.968488	0.761955	0.545585	0.454765	0.37694		-0.0244014	0	0.695286		-1.02967	0.570538	0.964956		-0.131394	0.660778	0.97919	16.0942	-0.0826331
O75072	FKTN		1									1	1.02886	0.914727	1.0086	0.750658	0.309676	0.207848	0.168323									1	0.830596	0.964162	1.05638	0.510718	0.26996	0.12688	0.10861					13.4006	-0.186477	0.16469	0.991647					12.2051	-0.206104
O75083	WDR1	65	83	1	1.02111	1.02752	1.00737	0.703549	0.216384	0.0448205	0.0234085	1	1.01126	1.00612	1.00684	0.706116	0.269806	0.0578	0.0226244	1	0.980406	0.97456	0.982065	0.713108	0.248181	0.0597473	0.025667	1	0.978517	0.997047	0.975501	0.709142	0.277791	0.0656513	0.0205234	13.0402	-0.202874	0	0.998824	13.209	-0.182227	0	0.998835	13.1699	-0.187583	0	0.999012	13.2383	-0.177016
O75084	FZD7	1	3	1	1.10454	1.00497	1.07651	0.783472	0.35669	0.0901653	0.0351995	1	0.973656	1.05593	0.908391	0.570379	0.332593	0.206784	0.0482913	1	0.984081	0.983074	0.966269	0.806023	0.38011	0.147896	0.0415144	1	1.04535	0.90304	0.988052	0.692412	0.341011	0.154804	0.0679706	13.8648	-0.171892	0	0.9864	12.7874	-0.119752	0	0.9915	14.0825	-0.155181	0	0.99863	13.4912	-0.138168
O75093	SLIT1	8	8	1	1.06376	1.00987	1.03114	0.905396	0.923492	0.846214	0.673622	1	0.988744	0.97509	1.03041	0.846717	0.597079	0.580425	0.56956	1	0.977545	0.980369	1.04232	0.94763	0.722522	0.754832	0.625394	1	1.0416	1.12027	1.11446	0.898638	0.606152	0.615662	0.563416		-0.0402208	0	0.89364		-0.147468	0.574197	0.994133		-0.0830161	0.67739	0.938196		-0.161023
O75096	LRP4	5		1	1.0326	1.01648	0.947776	0.703629	0.390563	0.201345	0.146814									1	0.978375	1.11266	1.0848	0.909888	0.336627	0.207122	0.173347									13.7679	-0.11786	0.0333215	0.998277					14.0217	-0.237154	0.178451	0.982518
O75110	ATP9A	7	7	1	0.9874	0.968503	1.03144	0.511512	0.204823	0.0517412	0.0420239	1	0.995577	0.94051	0.855823	0.541976	0.197467	0.093978	0.029263	1	1.07206	1.03276	0.979141	0.435284	0.169955	0.0536516	0.0389811	1	1.06209	1.01433	0.924649	0.535481	0.198354	0.0993179	0.0395929	12.1837	-0.203629	0.0357195	0.994166	12.0379	-0.148888	0	0.993559	11.7528	-0.212532	0.0388655	0.994191	12.2077	-0.159268
O75113	N4BP1	22	19	1	1.02845	1.03926	1.04283	0.803599	0.448856	0.256056	0.164983	1	1.01462	1.05823	1.02988	0.752659	0.473485	0.290783	0.192993	1	0.999108	1.0063	1.05122	0.874009	0.468269	0.229153	0.149556	1	0.992787	0.984999	0.97491	0.752771	0.441709	0.2557	0.176709	14.517	-0.130749	0.108541	0.994381	14.5977	-0.11078	0.103604	0.991881	14.7587	-0.151036	0.107025	0.996946	14.3381	-0.113477
O75116	ROCK2	78	89	1	0.981421	1.0066	0.992876	0.769241	0.305412	0.0675054	0.0331887	1	0.970252	1.00431	1.02385	0.749525	0.39487	0.0825193	0.0361289	1	1.00339	0.99908	1.00804	0.86332	0.378084	0.0808504	0.0376509	1	0.982547	1.01324	1.00344	0.793677	0.393831	0.0869293	0.0392668	13.5818	-0.181596	0	0.999132	13.8447	-0.158727	0	0.993582	14.215	-0.19025	0	0.999439	14.0234	-0.165877
O75121	MFAP3L	1		1	0.953042	0.942941	1.06784	0.776171	0.605115	0.436543	0.193869									1	1.18809	1.25547	1.21172	0.980289	0.663466	0.429807	0.2485									16.1477	-0.085955	0	0.964297					16.7464	-0.116945	0.172923	0.853732
O75131	CPNE3	41	40	1	1.05114	1.0122	0.944959	0.664076	0.336387	0.153722	0.0764712	1	0.948842	0.917747	0.889537	0.603214	0.352165	0.205525	0.0947982	1	0.971559	0.971784	0.932969	0.636511	0.36247	0.193849	0.0844527	1	1.00192	1.00428	0.959675	0.709266	0.358672	0.217402	0.115013	13.2939	-0.131531	0	0.997341	12.9776	-0.111146	0	0.988777	13.2818	-0.11848	0	0.997253	13.6848	-0.124924
O75132	ZBED4	1	2	1	0.989189	1.07376	1.20675	0.77668	0.346356	0.11242	0	1	0.985925	1.08089	1.12283	0.597726	0.276459	0.207343	0.121006	1	1.33923	1.47277	1.36495	0.678554	0.378743	0.100909	0.0753277	1	0.915823	1.07191	0.924713	0.623717	0.263952	0.19576	0.13073	13.8446	-0.176404	0	0.96481	12.5802	-0.214076	0.165806	0.976556	13.5978	-0.164357	0.0353437	0.787085	12.7775	-0.146018
O75140	DEPDC5	4	5	1	1.05699	1.10281	1.09899	0.684828	0.400716	0.270831	0.193231	1	0.949284	0.96103	1.0267	0.671013	0.349656	0.0652332	0.0169695	1	0.960628	1.11336	0.949563	0.744893	0.316495	0.200718	0.179862	1	1.02152	1.07463	1.0721	0.673436	0.342657	0.0742736	0.0323923	13.6262	-0.143203	0.192849	0.97133	13.3159	-0.159716	0	0.988702	13.4217	-0.174875	0.160088	0.984687	13.3491	-0.160494
O75143-5	ATG13	5	6	1	1.03991	1.09539	1.08357	0.738901	0.405856	0.204166	0.151159	1	1.06024	0.986642	0.965204	0.652374	0.360743	0.315139	0.243657	1	1.05981	1.13153	1.00048	0.766116	0.367701	0.187287	0.126754	1	0.915453	0.99021	1.0119	0.670109	0.354584	0.258241	0.184087	13.9496	-0.141016	0.104302	0.981081	13.2552	-0.138364	0.239914	0.994064	13.8582	-0.149626	0.0835824	0.982466	13.3354	-0.145944
O75144-2	ICOSLG	6	2	1	1.04678	1.09596	1.07869	0.855131	0.846325	0.898036	0.748295	1	0.943787	1.00475	0.923427	0.686832	0.553995	0.722485	0.731454	1	1.01286	1.0637	1.06768	0.596459	0.679752	0.684479	0.625592	1	0.916852	0.951138	0.852239	0.815565	0.576772	0.621207	0.592695		-0.163763	0.830882	0.741393		-0.166432	0.671943	0.882406		-0.217461	0.644476	0.946799		-0.0421992
O75145	PPFIA3	5	11	1	0.921296	0.96812	0.946661	0.59499	0.268884	0.144316	0.100961	1	1.04024	1.03283	1.01207	0.619825	0.258835	0.157484	0.0984577	1	1.0155	0.975267	0.972714	0.673274	0.250674	0.143286	0.0891842	1	1.00933	1.10299	1.07657	0.613847	0.237436	0.13831	0.107719	12.676	-0.148111	0.0532494	0.99336	12.7607	-0.177177	0.0955284	0.996303	12.9825	-0.177037	0.0731751	0.998997	12.613	-0.214455
O75146	HIP1R	36	46	1	1.00107	1.00296	0.947802	0.608956	0.19796	0.0410698	0.0221489	1	1.01373	1.02761	0.983966	0.632415	0.253133	0.0862706	0.0346275	1	0.999728	0.99745	0.970512	0.641555	0.231883	0.0614998	0.0254334	1	1.00252	0.991455	0.98922	0.652682	0.257889	0.0916888	0.0416018	12.5739	-0.187153	0	0.999164	12.8619	-0.165723	0	0.998919	12.8198	-0.178292	0	0.999688	12.9757	-0.165342
O75147	OBSL1	1	2	1	1.03372	0.999951	1.04737	0.809607	0.654197	0.569292	0.249243	1	0.89173	1.01039	1.0384	0.805925	0.570789	0.440141	0.32231	1	1.10881	1.25839	1.21309	1.0033	0.73761	0.565984	0.323639	1	0.982733	1.11042	1.16031	0.877199	0.545908	0.47647	0.335813	17.4367	-0.0728508	0	0.954457	16.1434	-0.0880955	0.240976	0.969805	18.3648	-0.0891311	0.0796794	0.828097	15.8969	-0.116858
O75150	RNF40	38	32	1	1.00107	1.03402	1.07129	0.896448	0.851372	0.689124	0.133477	1	0.998834	1.04166	1.0352	0.796829	0.565602	0.431147	0.153229	1	1.01261	1.05398	1.05005	0.992942	0.688527	0.504336	0.160624	1	0.993001	1.03599	1.01928	0.818231	0.526574	0.353135	0.153115	18.7752	-0.212868	0	0.947388	15.8486	-0.0917845	0	0.977694	17.2519	-0.111647	0	0.974172	15.4221	-0.10124
O75152	ZC3H11A	9	9	1	0.939793	0.922214	0.798413	0.412655	0.152888	0.0647789	0.042825	1	1.03077	0.986652	0.941281	0.513052	0.199954	0.139329	0.0929039	1	0.968694	0.972617	0.838872	0.406405	0.150677	0.0831656	0.0417448	1	0.994831	1.023	0.900459	0.51831	0.2129	0.115418	0.0936896	11.1122	-0.154077	0	0.9915	12.0684	-0.177088	0.0804824	0.998845	11.2665	-0.160112	0	0.998631	12.061	-0.152984
O75153	CLUH	61	78	1	1.00632	1.02322	1.01784	0.796405	0.525377	0.133242	0.0259124	1	0.977618	0.996026	0.992228	0.718011	0.477153	0.260193	0.0428141	1	0.979496	0.99655	0.991094	0.802897	0.548285	0.199815	0.0332134	1	0.992589	1.02772	0.993979	0.765222	0.471077	0.25968	0.0428626	14.6789	-0.150901	0	0.987479	14.3229	-0.11664	0	0.986808	14.9181	-0.137957	0	0.988607	14.5117	-0.122483
O75157	TSC22D2	2	3	1	0.948556	0.989335	0.99101	0.871824	0.625122	0.309466	0.0841558	1	1.02083	1.16914	1.24845	0.966475	0.509375	0.282121	0.122024	1	0.911217	0.847313	1.00607	0.924174	0.549653	0.267212	0.0917371	1	1.06528	1.31073	1.31841	0.879127	0.574198	0.291028	0.0969449	15.8439	-0.127984	0	0.990414	15.2181	-0.168691	0.122849	0.924108	15.4828	-0.137969	0	0.963192	15.6149	-0.131554
O75161	NPHP4	2	2	1	0.865095	0.997842	1.07306	0.771701	0.602383	0.442271	0.344098	1	1.00263	0.897213	0.892751	0.464364	0.256948	0.155091	0.0837383	1	0.859803	0.9007	0.974625	0.793581	0.431018	0.356899	0.260816	1	1.03256	1.00069	0.978951	0.570739	0.221324	0.147469	0.117196	16.3737	-0.0834632	0.254301	0.941731	11.8802	-0.139529	0.0446278	0.989278	14.3891	-0.13104	0.256496	0.948798	12.3965	-0.19353
O75164	KDM4A	8	10	1	1.02151	0.968136	0.970804	0.723692	0.283842	0.12871	0.0678506	1	0.902756	0.903108	1.16698	0.942442	0.40043	0.126634	0.0528012	1	1.00158	1.04002	1.0098	0.695155	0.348014	0.126761	0.049455	1	0.993437	1.35113	1.16985	0.902009	0.367769	0.160516	0.0623408	13.3421	-0.167011	0.0340508	0.998552	14.5306	-0.223518	0.0490785	0.963283	13.4973	-0.14666	0	0.996656	14.2934	-0.202822
O75165	DNAJC13	55	51	1	1.06036	1.00525	0.894674	0.398451	0.087919	0.0524038	0.0386695	1	1.02903	0.98103	0.859099	0.392586	0.0826213	0.0415367	0.0444585	1	0.986307	0.965124	0.865738	0.357638	0.0930896	0.0523707	0.0339842	1	1.02647	0.926382	0.839249	0.368458	0.0977146	0.0427328	0.032654	11.3509	-0.201217	0.0101435	0.996859	11.2009	-0.188681	0	0.997562	11.0858	-0.195738	0.00819688	0.998754	11.0381	-0.183561
O75167-4	PHACTR2	5	5	1	1.02035	1.02818	1.02679	0.812385	0.763671	0.421251	0.13725	1	1.0212	0.938208	1.01483	0.816728	0.638661	0.448591	0.15253	1	1.01667	1.07656	1.06906	0.96151	0.663815	0.446584	0.164189	1	0.979739	1.11793	1.24389	0.950829	0.566286	0.448477	0.171298	16.9343	-0.115512	0	0.963933	16.3631	-0.093276	0	0.971488	16.8547	-0.110979	0	0.978284	16.3343	-0.109166
O75170-3	PPP6R2		18									1	0.992707	0.978625	0.997821	0.665322	0.317099	0.147636	0.0729361									1	1.01778	1.11457	1.01129	0.68444	0.299647	0.139941	0.0816735					13.2659	-0.143865	0.0162394	0.998479					13.2425	-0.15949
O75170	PPP6R2	20		1	1.02123	0.984283	0.974756	0.596038	0.265397	0.122161	0.0512168									1	0.966217	1.01088	0.937906	0.54041	0.26453	0.106191	0.0576409									12.7433	-0.150791	0.00646247	0.998692					12.4081	-0.144409	0	0.998136
O75175	CNOT3	15	12	1	0.997807	0.971878	0.991098	0.662557	0.35663	0.278282	0.18157	1	0.983035	0.957629	0.880927	0.548631	0.247882	0.157708	0.130577	1	1.00589	0.997541	0.980371	0.716862	0.334224	0.201142	0.16449	1	1.00108	0.960398	0.917486	0.591336	0.262697	0.153643	0.118308	13.3611	-0.136154	0.172349	0.996433	12.2494	-0.133891	0.0547045	0.997066	13.4424	-0.155806	0.135972	0.99995	12.5975	-0.141019
O75177	SS18L1	1	1	1	1.25666	1.17995	0.968943	0.795801	0.771732	0.863535	0.53088	1	1.55638	1.16986	1.01175	0.85098	0.433639	0.536344	0.60378	1	1.22559	1.36488	1.02897	0.778568	0.687488	0.573964	0.579285	1	0.742545	0.965068	1.05789	0.694757	0.292952	0.346642	0.193091		-0.0313926	0	0.624672		-1.0754	0.524588	0.634284		-0.0782241	0.569645	0.693387	12.8376	-0.251727
O75179	ANKRD17	27	29	1	0.986631	0.947106	0.893438	0.5449	0.243513	0.111223	0.0377014	1	1.01508	1.01983	0.957433	0.629252	0.310849	0.14918	0.064679	1	0.986939	0.968836	0.947756	0.552408	0.274814	0.112197	0.0449703	1	1.01087	1.02046	0.99537	0.650776	0.306457	0.14832	0.0677281	12.2685	-0.143332	0	0.996634	13.0503	-0.135556	0	0.999055	12.5108	-0.144606	0	0.99775	13.161	-0.14487
O75182	SIN3B	13	11	1	1.00767	0.975212	0.918272	0.547948	0.226988	0.0862821	0.0364702	1	1.0319	1.03858	0.930768	0.58346	0.299069	0.143368	0.0789115	1	1.02707	0.999119	0.946552	0.645482	0.213116	0.0799139	0.0472468	1	0.957186	0.937458	0.890533	0.55135	0.267792	0.131749	0.0856446	12.3013	-0.155134	0	0.99909	12.7408	-0.131138	0	0.997603	12.7816	-0.177981	0.00997208	0.998743	12.3729	-0.130184
O75185-2	ATP2C2	1		1	1.28614	1.2556	1.04335	0.859945	0.525641	0.318934	0.156908									1	1.15985	1.21316	1.85709	2.87112	0.426303	0.198346	0.187385									15.3968	-0.113924	0.0379661	0.880593					14.9369	-1.33665	0.192866	0.261854
O75190	DNAJB6	5	9	1	1.00721	0.942586	0.849216	0.594905	0.236117	0.0782411	0.0229915	1	0.976625	0.930687	0.89474	0.539021	0.254181	0.134202	0.0700051	1	1.0089	0.934217	0.875731	0.578154	0.226664	0.0919098	0.0370112	1	0.97703	0.993602	0.883283	0.553059	0.266604	0.103459	0.0564604	12.3858	-0.148031	0	0.989392	12.2877	-0.133967	0	0.995375	12.3511	-0.148474	0	0.993242	12.3335	-0.137674
O75191	XYLB	7	6	1	1.0144	1.0256	1.01689	0.764141	0.361845	0.0869914	0.049727	1	1.00779	1.02545	1.02773	0.689016	0.446364	0.147828	0.0261988	1	1.03939	1.01813	0.998491	0.934225	0.455678	0.123253	0.0450083	1	0.959168	0.978077	0.987681	0.75338	0.395555	0.129322	0.0285598	13.7912	-0.163422	0	0.997138	13.8629	-0.134862	0	0.986664	14.7668	-0.199056	0.0153914	0.99852	13.9035	-0.149806
O75197	LRP5	1	6	1	1.11068	1.16731	1.03502	0.545461	0.314952	0.168701	0.118431	1	1.00484	1.04963	0.969531	0.653746	0.337886	0.195576	0.118845	1	0.899216	1.07522	0.957857	0.796535	0.270198	0.163369	0.0993629	1	0.975563	1.07702	1.06989	0.728624	0.276703	0.15821	0.0855727	12.5361	-0.167217	0.12581	0.963192	13.2802	-0.131459	0.0584849	0.997312	13.4723	-0.207426	0.104728	0.98441	13.2921	-0.187849
O75204	TMEM127	2		1	0.977479	0.989282	0.912076	0.41041	0.152772	0.0548227	0.00608625									1	1.04785	1.06819	1.02669	0.541231	0.255999	0.0666113	0.0805278									11.5178	-0.184482	0	0.998946					12.4023	-0.182167	0.0539072	0.989065
O75208	COQ9	13	11	1	0.986154	0.97384	1.03104	0.89113	0.927391	1.00957	0.612355	1	0.984595	0.998185	1.01606	0.787907	0.628778	0.701623	0.55647	1	1.02442	1.06425	1.0941	1.05387	0.820768	0.852613	0.650495	1	0.982572	0.972008	0.982706	0.838613	0.617466	0.572844	0.495935		0	0	0.85219		-0.15256	0.626564	0.955739		-0.0449741	0	0.81426		-0.0782033
O75223	GGCT	22	28	1	0.972122	0.932787	0.977594	0.902936	0.907855	1.10377	0.895273	1	0.96735	1.02202	1.06185	0.807487	0.654588	0.699963	0.702325	1	0.990288	0.958244	0.971081	1.07235	0.797959	0.828399	0.749491	1	0.989406	1.02694	1.05564	0.825842	0.569918	0.575411	0.582775			0.953369	0.0592534		-0.780561	0.685625	0.964712		-0.331156	0.788945	0.878847		-0.977976
O75251	NDUFS7	4	5	1	0.980023	0.950235	0.885248	0.506922	0.12918	0.0149621	0.00321341	1	0.986373	0.954466	0.935175	0.561081	0.195863	0.0391558	0.000594367	1	1.00658	0.974109	0.932758	0.524966	0.159452	0.0389237	0.00811903	1	1.00781	1.00525	0.920884	0.578101	0.204204	0.0557158	0.00650591	11.889	-0.192053	0	0.993992	12.3285	-0.182631	0	0.996759	12.103	-0.190132	0	0.998849	12.4087	-0.17466
O75290-3	ZNF780A	1		1	0.948605	0.959087	0.784516	0.448148	0.241115	0.106249	0.0875603									1	1.01571	1.01874	0.860286	0.503959	0.227039	0.122682	0.0920677									11.3882	-0.127558	0	0.995643					11.9384	-0.135849	0.0107574	0.999024
O75298	RTN2	2	3	1	1.05252	1.22101	1.21307	0.875957	0.557773	0.343276	0.0889872	1	1.08183	0.994992	1.0237	0.715874	0.400685	0.286959	0.0615535	1	1.08386	1.02977	1.19096	0.938861	0.610555	0.273177	0.137169	1	0.977861	0.966461	0.948872	0.664068	0.388201	0.2762	0.10277	15.6626	-0.122487	0	0.913588	14.0992	-0.117134	0	0.982152	15.7866	-0.14692	0.0632415	0.959085	13.7234	-0.106579
O75306	NDUFS2	27	39	1	0.98596	1.00921	0.94856	0.575058	0.22679	0.0816859	0.0332939	1	1.02447	1.04733	0.984028	0.594193	0.256164	0.136531	0.0778196	1	0.999393	0.973791	0.91389	0.530815	0.219251	0.0854426	0.0391049	1	0.983823	0.984887	0.928922	0.55919	0.249032	0.105671	0.066702	12.4891	-0.163216	0	0.999611	12.6655	-0.163221	0.0563787	0.997063	12.1907	-0.155167	0	0.999225	12.4446	-0.145311
O75312	ZNF259	23	29	1	0.97886	0.96686	1.02151	0.860921	0.859724	0.991875	0.827914	1	1.02998	1.01094	1.05673	0.819407	0.631725	0.715368	0.668334	1	1.0091	1.01261	1.01774	0.96785	0.785739	0.792672	0.734718	1	1.01746	1.05855	1.04454	0.843185	0.603267	0.603965	0.575837		-0.0747737	0.884773	0.550574		-0.816468	0.671809	0.964928		-0.0783281	0.760347	0.979279		-0.161354
O75317	USP12	3		1	0.968547	0.985076	0.879162	0.641957	0.22937	0.104285	0.0365734									1	1.04264	0.913098	0.871907	0.538996	0.248163	0.0969041	0.0302299									12.7293	-0.154091	0	0.993059					12.1699	-0.142164	0	0.990174
O75319	DUSP11	1	2	1	1.07846	1.21776	0.794074	0.365268	0.152428	0.0204753	0.0205716	1	0.888378	1.03825	0.907591	0.487333	0.231289	0.180564	0.0774947	1	0.838561	1.10549	0.809212	0.339214	0.15166	0.0600732	0.0224868	1	0.979982	1.11066	0.986307	0.556741	0.249709	0.151289	0.064513	10.9414	-0.172099	0	0.966505	11.9656	-0.150264	0.0680657	0.985313	10.9032	-0.171382	0	0.972094	12.4759	-0.164198
O75323	GBAS	10	9	1	0.99794	1.00591	0.974963	0.637346	0.176736	0.0456436	0.0207666	1	0.964575	0.992134	1.00892	0.744647	0.296816	0.055639	0.013861	1	0.965011	1.00838	1.02556	0.765694	0.241561	0.0602318	0.0248844	1	0.984117	1.08174	1.01189	0.750616	0.272493	0.0692691	0.0243322	12.6747	-0.203974	0	0.999911	13.4437	-0.184232	0	0.997413	13.3558	-0.206	0.0037783	0.998365	13.4071	-0.18785
O75325	LRRN2		1									1	1.18715	0.78593	0.8695	0.78511	0.391312	0.513741	0.266055									1	1.0236	1.25493	1.29914	0.684599	0.513284	0.427619	0.165761					15.412	-0.0656994	0	0.828452					15.0131	-0.103825
O75326	SEMA7A	1	2	1	1.05406	1.09591	1.08744	0.815078	0.597828	0.324306	0.0649732	1	0.821904	0.966122	0.914564	0.570121	0.368948	0.268275	0.0710777	1	0.872523	0.90228	0.959775	0.81794	0.508033	0.270178	0.0967296	1	1.11121	1.07928	1.04232	0.717457	0.40015	0.320569	0.104993	15.5732	-0.119766	0	0.967154	13.0346	-0.106883	0	0.951837	14.958	-0.117902	0	0.965252	14.1903	-0.113422
O75330-3	HMMR	22	30	1	0.993396	1.01169	0.926912	0.470657	0.163079	0.10709	0.0856014	1	0.99924	0.951456	0.898736	0.408452	0.107777	0.062261	0.0367226	1	1.00464	1.04192	0.940598	0.495993	0.128035	0.110439	0.0833411	1	0.974152	0.993867	0.86976	0.401972	0.108115	0.0618106	0.035101	11.7908	-0.188625	0.0652588	0.99966	11.4157	-0.194244	0.0130119	0.99799	11.9267	-0.218912	0.0718937	0.997402	11.3027	-0.182012
O75340	PDCD6	7	12	1	0.949918	0.88627	0.942411	0.755424	0.718223	0.861992	0.845058	1	1.04835	1.00462	1.04138	0.715902	0.516841	0.575062	0.618305	1	0.966807	0.956464	0.94615	0.76249	0.645077	0.677721	0.70606	1	0.955002	1.06416	1.04233	0.753268	0.517842	0.488558	0.50982			0.555443	0.564745		-1.04487	0.570069	0.975042		-0.0820498	0.673007	0.960628		-0.207697
O75347	TBCA	20	22	1	0.988445	0.992812	1.05404	0.853129	0.912221	0.985694	0.861208	1	0.987548	0.96395	0.942342	0.749908	0.56007	0.614791	0.635334	1	1.00644	1.02544	1.03265	0.912426	0.775795	0.763353	0.740423	1	0.953224	1.04375	0.974341	0.849549	0.570191	0.568021	0.525373		-0.0513396	0.903228	0.582732		-0.0954118	0.596635	0.96722		-0.0687207	0.7494	0.982174		-0.144226
O75348	ATP6V1G1	5	5	1	1.01469	0.993982	1.04179	0.832075	0.662413	0.417262	0.313278	1	1.03467	0.955054	1.11557	0.744094	0.510601	0.332633	0.228655	1	1.04286	1.04601	1.08071	0.953333	0.63773	0.37797	0.271406	1	1.05277	1.01814	1.1017	0.807507	0.530824	0.341943	0.217052	16.8875	-0.0807117	0.079048	0.990123	14.8661	-0.1086	0.166792	0.969725	16.2458	-0.129117	0.228095	0.985527	15.3074	-0.107802
O75351	VPS4B	36	33	1	0.948854	0.961149	0.986806	0.707083	0.343353	0.093764	0.029092	1	0.984986	1.00843	0.982511	0.703516	0.356541	0.139491	0.0495763	1	0.990047	1.00363	0.960204	0.745332	0.374258	0.125081	0.0355536	1	0.985163	1.0024	0.981025	0.71531	0.358843	0.144748	0.05756	13.4683	-0.15643	0	0.994164	13.5594	-0.142349	0	0.998611	13.7701	-0.149504	0	0.997761	13.6311	-0.141419
O75352	MPDU1	4	4	1	1.02501	1.0148	0.996224	0.644808	0.321139	0.118691	0.0392664	1	1.14839	1.1401	0.951936	0.607894	0.328067	0.166719	0.10223	1	1.00865	1.06576	0.965177	0.247902	0.282935	0.142333	0.0540149	1	1.14329	1.09178	1.13738	0.636411	0.323248	0.165066	0.0958761	13.1553	-0.147304	0	0.997048	12.9995	-0.129075	0.0258978	0.96809	10.8285	-0.330396	0.152932	0.978851	13.0896	-0.167909
O75354	ENTPD6	6	10	1	0.973116	1.06003	0.990569	0.625473	0.341262	0.175668	0.102612	1	0.967679	1.04261	0.9835	0.618532	0.238363	0.107281	0.041306	1	1.02582	0.982837	0.95604	0.614243	0.303951	0.17614	0.0877851	1	0.948772	0.957636	0.946532	0.606047	0.246846	0.102689	0.0297859	13.1672	-0.133304	0.0430511	0.993869	12.7637	-0.166506	0.0125021	0.997411	12.9592	-0.133266	0.0267726	0.998546	12.6918	-0.156993
O75356	ENTPD5	2	2	1	0.981137	0.861326	1.01636	0.688591	0.303867	0.229659	0.0738311	1	1.05122	1.0653	1.17387	0.7239	0.282969	0.167875	0.0805141	1	0.957071	1.03391	1.20252	0.771822	0.37365	0.171933	0.105107	1	0.920853	1.03281	1.02299	0.634248	0.273054	0.114768	0.048313	13.3549	-0.147963	0.0705149	0.973851	13.2962	-0.1917	0.0950965	0.970366	13.9174	-0.163288	0.0796282	0.961878	12.9579	-0.162602
O75362	ZNF217	6	9	1	1.04059	1.06525	1.05642	0.730173	0.44428	0.20388	0.118287	1	1.05703	1.03557	1.08814	0.745173	0.385541	0.199244	0.0828279	1	1.04876	1.054	1.08632	0.814294	0.428494	0.20055	0.109532	1	1.00075	1.06441	0.976026	0.681383	0.409776	0.175372	0.0754529	14.2336	-0.122118	0.00807103	0.9872	13.9785	-0.140138	0.0312389	0.986075	14.3978	-0.14496	0.0532678	0.987603	13.7137	-0.124497
O75365	PTP4A3	1		1	0.92741	0.898064	0.959556	0.539567	0.37135	0.379923	0.105801									1	1.26842	1.0675	1.02955	0.559278	0.463872	0.285954	0.190594									13.1314	-0.103636	0.0864831	0.941969					13.3587	-0.117513	0.180953	0.913342
O75367	H2AFY	6	5	1	1.10443	1.10366	1.00329	0.550154	0.218646	0.127242	0.0525813	1	0.989426	1.00194	0.878573	0.441274	0.0996208	0.0350041	0.0106959	1	1.01675	0.918202	0.858128	4.7826	0.218749	0.138477	0.0500302	1	1.02148	0.981401	0.878431	0.432239	0.115849	0.0451231	0.0248664	12.3689	-0.184672	0.0599622	0.983344	11.5078	-0.191238	0	0.998115		0.717304	1.29759	0.0141577	11.4719	-0.183201
O75368	SH3BGRL	11	13	1	1.01028	0.996069	1.0559	0.853161	0.854558	1.12217	0.857125	1	1.02952	1.0515	0.985833	0.717308	0.628486	0.71907	0.645764	1	0.986422	1.02556	0.989456	0.831669	0.774653	0.780974	0.688051	1	0.990431	0.87733	0.971629	0.800487	0.565311	0.587432	0.4882		-0.0294852	0.922035	0.197644		-0.137668	0.664327	0.965172		-0.0460451	0.715827	0.958469		-0.0958909
O75369-8	FLNB	184		1	0.979282	0.991343	0.994631	0.823746	0.566539	0.181321	0.0379577									1	0.990566	0.986517	0.990306	0.870811	0.537548	0.218047	0.0516026									15.0722	-0.146767	0	0.989258					15.1452	-0.145458	0	0.997265
O75369	FLNB	1	201	1	0.852295	0.904027	0.91512	0.705006	0.51762	0.295744	0.0948334	1	0.979204	1.01124	1.00495	0.764317	0.485409	0.239532	0.0447152	1	0.974321	0.827226	0.986678	0.677977	0.507284	0.230275	0.112955	1	0.980013	0.998651	0.983101	0.768473	0.467319	0.227388	0.0529085	14.4677	-0.0988345	0	0.941388	14.5389	-0.124822	0	0.991237	14.257	-0.106186	0	0.951841	14.4416	-0.125975
O75376	NCOR1		2									1	1.04166	1.07598	1.06769	0.584592	0.367599	0.20747	0.124227									1	0.913634	1.03952	0.975969	0.55625	0.25787	0.122667	0.0820373					13.0116	-0.145669	0.123488	0.97801					12.4714	-0.161636
O75380	NDUFS6	6	3	1	1.02681	1.02448	0.973737	0.648393	0.613657	0.887198	0.837635	1	0.996722	0.994861	0.863224	0.681725	0.311913	0.408655	0.670789	1	0.966533	1.01592	0.986981	0.714165	0.446234	0.569948	0.735149	1	0.989408	0.940341	0.886396	0.566505	0.302805	0.333855	0.542467		-0.653479	0.746721	0.704644	15.2376	-0.120387	0.471513	0.828397		-1.222	0.583777	0.871416	12.3209	-0.154994
O75381	PEX14	9	6	1	1.03105	1.02146	1.04873	0.885917	0.864343	0.871266	0.481547	1	0.946474	0.992547	0.961885	0.71843	0.481586	0.444101	0.325964	1	1.0321	1.02931	1.00977	0.904365	0.72247	0.644078	0.40127	1	0.938606	0.862511	0.913661	0.753081	0.459345	0.414304	0.241656	20.9731	-0.117495	0	0.86901	14.9943	-0.0932686	0.296461	0.988556	19.5763	-0.0601468	0	0.976184	15.1521	-0.0762262
O75382	TRIM3		7									1	0.978939	1.023	0.921852	0.495682	0.21983	0.145962	0.0989514									1	0.991677	0.886222	0.899389	0.520191	0.228762	0.110816	0.0827639					11.9815	-0.162898	0.0787256	0.999016					12.118	-0.143173
O75385	ULK1	1		1	0.991072	0.910849	0.909561	0.605124	0.306654	0.176496	0.109284									1	1.05315	1.05812	1.06641	1.14958	0.294132	0.161109	0.105554									12.8675	-0.119566	0	0.992212					14.7161	-0.919667	0.133326	0.976628
O75386	TULP3	2	3	1	0.991337	1.02351	1.17787	0.705076	0.417192	0.233438	0.214874	1	0.982141	1.01786	1.00878	0.619323	0.334078	0.188977	0.0941744	1	0.895735	0.964647	1.03199	0.806465	0.325779	0.219727	0.13772	1	0.971134	0.862734	0.934842	0.619693	0.336535	0.172865	0.104776	13.7216	-0.151099	0.197812	0.960792	13.1242	-0.137192	0.0553983	0.995109	13.7279	-0.186021	0.146967	0.985134	13.0869	-0.120258
O75390	CS	36	34	1	0.964082	0.972813	0.974749	0.829265	0.548522	0.0599981	0.00796082	1	0.972193	0.962127	0.976337	0.766936	0.535834	0.20205	0.026043	1	0.970511	0.991403	0.95756	0.959982	0.579881	0.142445	0.01125	1	0.992138	1.00036	1.01138	0.834355	0.545393	0.221951	0.0320521	14.9424	-0.19488	0	0.980398	14.6865	-0.130914	0	0.982504	15.3755	-0.210472	0	0.997139	15.071	-0.141228
O75391	SPAG7	15	13	1	0.977714	1.02442	1.07294	0.853099	0.899365	1.10153	0.885986	1	0.927409	0.960399	1.02202	0.763007	0.598161	0.650583	0.650614	1	0.985677	1.01537	1.0588	0.930858	0.756368	0.80178	0.743288	1	1.0404	1.13897	1.1519	0.887006	0.602799	0.611947	0.607307		-0.0262595	0.936776	0.191288		-0.922914	0.633119	0.957276		-0.568959	0.767146	0.947701		-0.938943
O75394	MRPL33	3	3	1	1.20052	1.30833	1.33643	1.02845	0.807273	0.683754	0.454359	1	1.15665	1.22606	1.33815	0.946178	0.731949	0.620417	0.53402	1	1.15406	1.23342	1.30872	0.864968	0.713464	0.579988	0.39929	1	1.1745	1.17902	1.20669	0.923433	0.641923	0.576631	0.451415	20.3329	-0.0735182	0.16351	0.623694		-0.0821692	0.528246	0.681026	18.7972	-0.0722527	0.251864	0.752972	19.5736	-0.0977861
O75396	SEC22B	12	15	1	0.988692	0.983448	0.95892	0.592873	0.191	0.052092	0.0196312	1	0.982795	0.957939	0.830263	0.551137	0.193712	0.0331731	0.00609968	1	1.00585	1.00174	0.92862	0.631854	0.223034	0.0610189	0.0250475	1	0.97852	0.875744	0.866286	0.573914	0.211051	0.0469378	0.0114903	12.502	-0.186568	0	0.999502	11.9968	-0.15869	0	0.987908	12.7203	-0.174256	0	0.998349	12.2742	-0.16193
O75398	DEAF1	1		1	0.929416	1.15024	0.957233	0.932252	0.445398	0.198794	0.155461									1	0.97064	0.90081	0.877233	0.618629	0.416092	0.171771	0.0952708									14.6771	-0.19655	0.141027	0.972689					13.1888	-0.109143	0	0.980455
O75400-3	PRPF40A	2	2	1	0.93249	0.882877	0.765062	0.317195	0.228817	0.256381	0.150915	1	0.988039	0.855708	0.426744	0.326994	0.133382	0.111329	0.0958817	1	0.985873	0.847954	0.659127	0.306837	0.216102	0.146185	0.101682	1	0.895361	0.587606	0.565455	0.365421	0.129745	0.110995	0.0574233	10.4384	-0.189103	0.188198	0.974975	8.65232	-0.138038	0	0.992967	9.9444	-0.121599	0	0.989014	7.68941	-0.130364
O75400	PRPF40A	28	28	1	0.930513	0.845556	0.674093	0.349881	0.130347	0.0737774	0.0545531	1	0.985228	0.852775	0.683399	0.362259	0.138198	0.0816678	0.0656846	1	0.952092	0.837922	0.653736	0.348077	0.148609	0.0698464	0.054084	1	0.964204	0.859627	0.673607	0.358218	0.136361	0.0782029	0.0618694	10.1477	-0.142364	0	0.978685	10.2584	-0.139172	0	0.98477	9.99253	-0.137871	0	0.980889	10.1943	-0.140154
O75410-2	TACC1	25	31	1	1.02441	1.06892	1.08666	0.837192	0.854627	0.906727	0.624631	1	0.991466	1.02828	1.06147	0.763578	0.587306	0.527548	0.434659	1	1.01371	1.06185	1.12319	0.897386	0.701191	0.630697	0.497503	1	1.01468	1.10855	1.08868	0.849903	0.558467	0.496051	0.383831		-0.0309572	0	0.711999	17.6365	-0.0949836	0.451415	0.976751		-0.0674196	0.46148	0.933664	16.2912	-0.107768
O75410-5	TACC1	1		1	0.861662	1.36773	0.970851	0.763389	1.08815	0.801815	0.498892									1	0.813826	1.11464	1.22067	1.17477	0.878651	0.430363	0.460561									19.1485	-0.752852	0.498892	0.520801					19.6694	-0.0781325	0.212989	0.736942
O75414	NME6	4	4	1	1.00528	1.06174	0.967003	0.719126	0.459525	0.31075	0.15752	1	1.08986	1.01779	1.08059	0.787531	0.503605	0.274047	0.162679	1	0.959207	1.00932	1.01533	0.810162	0.399802	0.255413	0.0987907	1	1.10507	1.13097	1.20673	0.773112	0.464415	0.2733	0.14349	14.5082	-0.0969587	0	0.993291	14.9135	-0.114163	0.0489825	0.981023	14.3401	-0.135628	0.0541712	0.993956	14.5843	-0.12856
O75417	POLQ	2	2	1	1.00786	0.94552	0.823064	0.438476	0.268344	0.150694	0.155873	1	1.24343	1.10135	0.990249	0.604298	0.273142	0.190981	0.241666	1	0.883407	1.78947	1.36853	0.538648	0.217728	0.139004	0.116708	1	0.848857	1.20554	0.940983	0.437248	0.228974	0.197823	0.198093	11.4899	-0.13358	0.0876429	0.996517	12.5207	-0.220997	0.21359	0.944798	12.1181	-0.381679	0.153246	0.705973	11.6013	-0.208706
O75419-3	CDC45	6	9	1	0.957938	1.0758	1.00635	0.511321	0.171567	0.0589704	0.0374077	1	0.942453	0.990741	0.916077	0.522528	0.202602	0.0702781	0.0628966	1	1.03624	1.06063	0.956503	0.491604	0.176247	0.065634	0.0324762	1	1.05623	0.954688	0.929207	0.556518	0.188881	0.0845216	0.053034	12.1191	-0.212244	0.0341293	0.993439	12.1182	-0.159471	0.00251988	0.996797	12.0015	-0.184995	0.0138341	0.996325	12.2889	-0.168015
O75420	GIGYF1	2	2	1	1.04891	1.05319	0.990822	0.583349	0.27137	0.163626	0.110152	1	0.974225	1.01175	1.04908	0.754535	0.376341	0.269405	0.173064	1	1.01646	0.99939	1.03132	0.642653	0.253222	0.137589	0.0920145	1	0.96379	1.11041	1.02865	0.636195	0.29866	0.242213	0.144939	12.6173	-0.165424	0.0999716	0.994595	13.8459	-0.149153	0.170118	0.993544	12.845	-0.18604	0.0864664	0.997575	12.9098	-0.172576
O75427	LRCH4	10	7	1	0.962552	0.953835	0.915349	0.526071	0.185291	0.0923616	0.0540741	1	0.969317	1.0224	0.948821	0.552767	0.24947	0.199797	0.10944	1	1.03093	1.02691	0.931378	0.606906	0.189413	0.084818	0.0664862	1	1.04626	1.06381	1.02595	0.563268	0.268583	0.194297	0.125547	12.106	-0.162071	0.00825471	0.996862	12.3833	-0.157722	0.106752	0.996928	12.5274	-0.181854	0.0296985	0.997325	12.4509	-0.190164
O75431	MTX2	11	9	1	0.984654	1.02207	0.901179	0.507608	0.203884	0.0799137	0.0379608	1	1.04862	1.04662	0.963723	0.545472	0.181617	0.0484651	0.0304331	1	0.948636	0.981129	0.923906	0.531188	0.185339	0.0675809	0.030725	1	1.03639	1.07272	0.930706	0.569066	0.172982	0.0492506	0.0148798	12.0164	-0.157186	0	0.999157	12.2747	-0.18506	0	0.99678	12.1516	-0.170007	0	0.997482	12.3307	-0.186204
O75436	VPS26A	23	29	1	1.08264	1.0705	1.0331	0.614339	0.192094	0.0537648	0.0331813	1	1.00239	1.00924	0.950496	0.569351	0.205207	0.0759758	0.0394839	1	1.00271	0.974984	0.953326	0.555284	0.18585	0.0533842	0.0298913	1	0.995594	0.956488	0.95154	0.559269	0.20111	0.0654887	0.0399653	12.6145	-0.206279	0.0186835	0.990658	12.42	-0.169099	0	0.999915	12.3144	-0.181106	0	0.999421	12.361	-0.171847
O75439	PMPCB	41	51	1	1.00999	1.02239	1.0293	0.811765	0.66045	0.550905	0.183792	1	0.973624	1.00483	0.997979	0.727093	0.500799	0.433019	0.234743	1	0.975344	0.97495	0.954418	0.853917	0.62823	0.48056	0.213815	1	0.989253	1.00763	1.00645	0.768497	0.498406	0.392144	0.224271	17.0556	-0.082108	0	0.951301	15.348	-0.0820218	0.0771745	0.984084	16.7307	-0.08372	0	0.982878	15.2496	-0.0915711
O75446	SAP30	3	4	1	1.02975	0.981791	0.901113	0.516935	0.166001	0.0514995	0.0148045	1	1.00677	0.995841	0.997556	0.572011	0.200578	0.0649448	0.0200604	1	1.05452	1.0513	0.951342	0.549422	0.195833	0.0636538	0.017051	1	1.08241	1.04623	0.98107	0.548072	0.221158	0.0775379	0.0189902	12.0023	-0.175289	0	0.997819	12.4675	-0.183796	2.2066e-05	0.998988	12.3039	-0.176656	0	0.995969	12.392	-0.170877
O75448	MED24	17	18	1	1.00087	0.983701	0.958833	0.603396	0.244497	0.135315	0.0664918	1	0.990995	0.941412	0.926951	0.532825	0.159174	0.04035	0.0319921	1	0.976795	0.974514	0.915301	0.509457	0.220305	0.110728	0.0677302	1	0.975123	0.94232	0.900846	0.522231	0.167541	0.048075	0.0346686	12.6815	-0.157318	0.0339682	0.999501	12.1274	-0.185314	0	0.996678	12.0846	-0.152635	0.021522	0.999042	12.0254	-0.172768
O75449	KATNA1	4	9	1	1.05312	1.02907	0.956217	0.49622	0.194773	0.103137	0.0490858	1	1.5577	1.0559	1.11178	0.625454	0.255002	0.120334	0.0636217	1	0.978024	0.976939	0.809225	0.420882	0.19789	0.0726841	0.0403891	1	1.0543	1.21978	0.89568	0.542432	0.212463	0.107116	0.0711051	12.0345	-0.179311	0.0402451	0.996819	12.8032	-0.192586	0.0702138	0.838693	11.2757	-0.147585	0	0.998334	12.2063	-0.149605
O75460	ERN1	3	6	1	0.951367	0.957762	0.937818	0.501729	0.152248	0.0335834	0.00715752	1	0.964052	1.00358	0.985971	0.617763	0.25093	0.100501	0.0520873	1	1.10508	1.1104	1.00175	0.551614	0.175226	0.0460155	0.0207131	1	1.02523	1.05283	1.09887	0.663389	0.23585	0.0913055	0.0425347	11.9935	-0.193925	0	0.996556	12.788	-0.164036	0.0147444	0.99852	12.3201	-0.200268	0.00569064	0.985104	12.934	-0.197245
O75461	E2F6	1	4	1	0.999743	0.932438	0.923496	0.522074	0.169771	0	0.00658597	1	0.945547	1.01047	1.08903	0.577529	0.180039	0.0548221	0.0227553	1	0.993739	0.897669	0.781436	0.454194	0.196634	0.0541913	0	1	1.05716	1.24014	1.11709	0.596252	0.169585	0.067908	0.0436699	12.0835	-0.193552	0	0.993864	12.436	-0.224136	0.0287247	0.989676	11.2571	-0.146806	0	0.985485	12.4464	-0.248468
O75462	CRLF1	4	1	1	0.946195	0.978252	0.96552	0.605216	0.280953	0.116912	0.0335732	1	1.04519	1.00091	0.950995	0.574273	0.18997	0.0509782	0.000842417	1	1.10718	1.10729	1.02118	0.751984	0.309717	0.131313	0.0348977	1	0.932059	0.936572	0.9743	0.549235	0.226186	0.0672689	0.0288923	12.8127	-0.149113	0	0.996127	12.4052	-0.18629	0	0.997873	13.6086	-0.163513	0	0.982863	12.3932	-0.169126
O75475	PSIP1	16	21	1	0.959761	0.954473	0.883302	0.583586	0.310522	0.188111	0.101082	1	0.951402	0.967264	0.873927	0.548572	0.275915	0.171793	0.107045	1	1.01189	0.956196	0.889626	0.575018	0.277007	0.165506	0.102754	1	0.983275	0.997023	0.907242	0.572886	0.278004	0.154532	0.10824	12.7071	-0.115717	0	0.996121	12.3795	-0.120047	0.00257847	0.996658	12.5584	-0.122636	0	0.9979	12.5553	-0.131097
O75477	ERLIN1	21	19	1	0.983354	0.954709	0.82307	0.349413	0.0581524	0.0214855	0.0192855	1	0.996118	0.91876	0.763621	0.365696	0.0625157	0.0195566	0.0100985	1	0.993546	0.95345	0.782862	0.336208	0.0684068	0.0281073	0.0215766	1	1.013	0.907608	0.785978	0.366353	0.0757139	0.0175245	0.0162948	10.8679	-0.196989	0	0.996311	10.6658	-0.180387	0	0.990463	10.6639	-0.186809	0	0.996648	10.7794	-0.181584
O75478	TADA2A	3	4	1	1.09844	1.1508	1.08296	0.68758	0.413759	0.198576	0.0862674	1	0.9001	1.01201	1.00419	0.588965	0.241613	0.119037	0.119867	1	0.950859	1.00607	1.02526	0.736421	0.260703	0.163164	0.132915	1	1.01684	1.04862	1.06035	0.615062	0.232747	0.103448	0.0871161	13.9212	-0.126089	0	0.962869	12.5328	-0.191785	0.101695	0.990103	13.1638	-0.210694	0.131335	0.996991	12.6546	-0.203638
O75486	SUPT3H	1		1	0.919619	0.794526	0.693984	0.35635	0.113154	0.0524734	0.00696945									1	0.843337	0.862047	0.67728	0.33711	0.138553	0.0399662	0.0317755									10.2454	-0.152232	0	0.958706					10.1729	-0.151201	0	0.962506
O75487	GPC4	4	2	1	0.973694	1.02954	1.00373	0.743087	0.470684	0.444761	0.305207	1	1.11192	1.16205	1.17504	0.846812	0.467009	0.321828	0.207794	1	0.965722	1.05921	0.946753	0.754278	0.502495	0.250312	0.183151	1	1.04236	1.03623	0.955012	0.646987	0.44824	0.216449	0.172866	14.7912	-0.108119	0.313352	0.98681	14.7649	-0.140455	0.200921	0.933577	14.7072	-0.100312	0	0.99211	13.8444	-0.10178
O75489	NDUFS3	10	9	1	1.01474	1.00095	0.958039	0.599254	0.259972	0.130979	0.0414937	1	1.11693	1.23706	0.884888	0.516004	0.208516	0.105369	0.044134	1	0.997852	1.02567	0.886868	0.522293	0.269436	0.0945629	0.0462045	1	0.788089	0.727421	0.739824	0.50652	0.239589	0.0763962	0.0269815	12.7345	-0.148126	0	0.999228	12.0482	-0.149855	0	0.955994	12.1884	-0.14002	0	0.997604	11.1767	-0.123144
O75494	SRSF10		2									1	1.06734	1.09843	1.00805	0.538216	0.292954	0.132632	0.110594									1	0.893149	0.850626	0.828062	0.475493	0.226201	0.0928229	0.0557042					12.446	-0.166625	0.0971621	0.984387					11.6242	-0.136298
O75496	GMNN	6	3	1	0.984248	0.989156	1.01516	0.778085	0.672808	0.806719	0.702704	1	0.896404	0.923621	0.85302	0.59619	0.400508	0.330873	0.360595	1	1.02134	1.06849	1.03424	0.841737	0.549874	0.573739	0.560714	1	1.10308	0.982405	0.996697	0.783762	0.385317	0.318943	0.33151		-0.584807	0.727411	0.927509	13.1726	-0.0999437	0.276262	0.966476		-1.07104	0.561443	0.98266	13.595	-0.198367
O75503	CLN5	13	12	1	1.05242	1.06221	1.13269	0.884365	0.760714	0.564284	0.176898	1	0.99283	0.98703	0.979086	0.800119	0.595754	0.509955	0.230267	1	0.992273	1.03845	1.05853	0.993302	0.666643	0.478286	0.219341	1	1.00032	1.07062	1.07384	0.853556	0.575433	0.478046	0.235586	17.7824	-0.107033	0	0.937824	16.6239	-0.0747265	0	0.976615	17.2182	-0.101594	0	0.980572	16.5866	-0.0836035
O75506	HSBP1	2		1	0.964933	1.61156	1.75369	1.80747	1.5512	1.71117	2.00334									1	1.09587	2.00132	1.40462	1.43318	1.73244	1.40515	1.3929										2.08864	1.5	0.521053						2.17794	1.5	0.526656
O75509	TNFRSF21	4	1	1	1.10588	1.00053	1.14618	0.834226	0.793809	0.638681	0.366586	1	1.03766	0.996235	0.957191	0.783467	0.45052	0.384276	0.27907	1	1.0381	1.05215	1.11022	0.921371	0.660988	0.47886	0.327202	1	0.93794	1.08833	1.22712	0.764648	0.382902	0.311594	0.294378	19.3282	-0.0679794	0	0.894322	14.6735	-0.112688	0.255097	0.993279	17.2143	-0.0929637	0.227866	0.969973	13.4875	-0.20208
O75521	ECI2	20	24	1	1.00722	1.0287	1.03497	0.898112	0.8717	0.886661	0.588581	1	0.983751	1.03959	1.08163	0.793531	0.613417	0.616088	0.531818	1	0.992411	1.05137	1.06125	1.11112	0.763794	0.741153	0.580063	1	0.972412	1.03325	1.04333	0.810657	0.547504	0.528029	0.467316		-0.0597271	0	0.851043		-0.128553	0.576353	0.963357		-0.170277	0.658981	0.876592	18.1708	-0.129929
O75525	KHDRBS3	4	2	1	1.05958	1.11636	1.05973	0.695296	0.37748	0.1036	0.0713435	1	0.997884	0.987682	0.984719	0.696232	0.286478	0.138048	0.0523201	1	1.02987	1.09719	1.0872	0.720903	0.27792	0.118132	0.0516844	1	1.01973	1.11976	1.04358	0.712826	0.294247	0.132292	0.0687516	13.6156	-0.146628	0	0.979494	13.2791	-0.15632	0.0125682	0.999467	13.32	-0.182068	0.0380633	0.98577	13.3437	-0.170118
O75528	TADA3	9	6	1	1.0267	0.959111	0.867177	0.509499	0.232132	0.108976	0.0662154	1	1.0712	1.01162	0.874022	0.477669	0.181981	0.0826131	0.0755528	1	0.993608	0.965602	0.949184	0.66386	0.191217	0.087674	0.0704281	1	0.998732	1.0846	0.853618	0.501101	0.16648	0.0806051	0.0762065	11.9877	-0.138035	0	0.997866	11.7451	-0.155048	0.0113901	0.995467	12.7646	-0.209767	0.0526179	0.997777	11.7804	-0.151555
O75529	TAF5L	1	7	1	0.791297	0.957717	0.93466	0.417208	0.238337	0.0581022	0.0387075	1	1.05413	0.965461	0.805554	0.409368	0.179531	0.112042	0.0888754	1	0.957329	0.849151	0.750176	0.449876	0.102163	0.0528006	0.0601318	1	1.00998	1.05378	0.857134	0.472763	0.180337	0.107472	0.0660049	11.7096	-0.167082	0.0152676	0.955725	11.1719	-0.147342	0.028609	0.996745	10.9294	-0.149622	0	0.970613	11.6832	-0.149221
O75530-2	EED	16	15	1	1.01237	1.0014	0.97049	0.623959	0.223643	0.0741381	0.0323943	1	0.99209	0.951776	0.899906	0.638718	0.299337	0.089926	0.0239162	1	1.03067	0.988169	0.956245	0.629715	0.286696	0.0912711	0.0367174	1	0.993004	0.957332	0.902157	0.59532	0.273606	0.0971185	0.0229295	12.7321	-0.174217	0	0.999848	12.9048	-0.147901	0	0.992921	12.9117	-0.153651	0	0.998155	12.6149	-0.146739
O75531	BANF1	19	19	1	1.4402	1.90113	1.96934	1.8447	2.16474	2.06435	1.77464	1	1.3947	1.69672	1.96841	1.3982	1.13774	1.26909	1.29286	1	1.51064	1.92344	2.25372	2.0506	1.59521	1.75308	1.63265	1	1.42217	1.87888	1.94476	1.62758	1.14571	1.19131	1.18669			1.5	-0.33321			1.4605	0.27197
O75533	SF3B1	67	67	1	0.992418	0.996417	0.982514	0.708908	0.298886	0.0695427	0.0292471	1	0.988242	0.985813	0.945015	0.683472	0.338034	0.094621	0.02907	1	1.00189	1.00906	0.977739	0.730323	0.325771	0.0892581	0.0325186	1	1.01817	1.01859	0.973118	0.710427	0.342644	0.108537	0.0338806	13.3089	-0.170206	0	0.998796	13.309	-0.150645	0	0.996337	13.5043	-0.163405	0	0.998876	13.4907	-0.152687
O75534-3	CSDE1		77									1	0.982067	0.991317	0.965064	0.706923	0.35441	0.124786	0.0750912									1	0.997335	1.00036	0.976979	0.735184	0.345454	0.139338	0.0796755					13.5452	-0.140932	0	0.99877					13.6628	-0.145151
O75534	CSDE1	62		1	1.02249	0.981482	0.992439	0.691607	0.266729	0.0517546	0.022387									1	0.987419	0.969677	0.972231	0.750734	0.295579	0.0806521	0.0293414									13.1288	-0.180914	0	0.99829					13.4808	-0.176156	0	0.998679
O75554	WBP4	6	9	1	0.860632	1.05325	1.01829	0.889123	1.0354	1.26672	1.0229	1	1.00337	1.06015	1.0677	0.745271	0.553974	0.550654	0.561781	1	0.940661	1.02216	1.05979	1.06132	0.77552	0.897046	0.912525	1	1.03084	1.11696	1.11769	0.82894	0.521219	0.498925	0.475462		0.135623	1.04762	0.103935		-1.04502	0.555469	0.979335		-0.048734	0.864354	0.584431	16.0027	-0.174051
O75564	JRK	1		1	1.08094	1.06702	0.899394	0.522234	0.137709	0	0									1	0.961227	0.948328	0.872332	0.348782	0.146348	0.032854	0.00671004									12.0194	-0.200823	0	0.989603					11.1278	-0.187763	0	0.995942
O75569	PRKRA	10	11	1	0.969569	0.922519	0.883556	0.567962	0.298791	0.13608	0.0182171	1	1.02527	0.994453	0.909786	0.580928	0.280052	0.145095	0.0518249	1	0.993033	0.990415	0.867782	0.486673	0.278186	0.137709	0.0358009	1	1.0138	0.9899	0.890882	0.54537	0.266475	0.146784	0.0423779	12.5022	-0.133036	0	0.98903	12.6158	-0.134231	0	0.99861	12.0013	-0.131801	0	0.997012	12.3472	-0.133744
O75570	MTRF1	2	1	1	1.06216	0.975186	1.00096	0.553032	0.229022	0.134957	0.0761017	1	1.11924	0.721213	0.985576	0.45535	0.434024	0.324531	0.158818	1	1.00708	1.0462	0.962817	0.62034	0.223336	0.123495	0.108872	1	0.949999	1.04549	1.05347	0.959679	0.405569	0.234655	0.131551	12.3797	-0.184675	0.079617	0.994811	12.0919	-0.164812	0.263973	0.859888	12.6405	-0.188086	0.0865198	0.998007	14.5448	-0.225342
O75575	CRCP	2	2	1	0.982782	1.03885	0.904114	0.730072	0.719027	0.811791	0.77154	1	0.970257	1.10908	1.03041	0.65483	0.581677	0.746382	0.663942	1	1.0154	0.940935	1.02868	0.688105	0.570781	0.677879	0.560571	1	1.00713	0.948964	0.934683	0.682522	0.513321	0.493473	0.473831		-0.62231	0.758107	0.937418		-0.293896	0.661013	0.90595		-0.954645	0.603077	0.955955	16.5859	-0.0991604
O75581	LRP6	10	6	1	1.06326	1.04405	0.989539	0.626564	0.254434	0.075278	0.0516944	1	1.09581	1.05138	1.08417	0.633883	0.280588	0.132332	0.0833201	1	1.03468	1.03737	1.02556	0.619571	0.252605	0.105008	0.0453782	1	1.01955	1.03047	1.00777	0.604028	0.265959	0.135741	0.068533	12.8347	-0.16646	0.00358726	0.994989	12.9183	-0.178413	0.0774433	0.982624	12.8155	-0.171725	0.0250405	0.99552	12.7629	-0.163808
O75582	RPS6KA5	12	13	1	0.966887	0.942508	0.837563	0.444854	0.0960239	0.0200243	0.0173541	1	1.01208	0.990509	0.965865	0.525441	0.158164	0.0561052	0.0351369	1	0.976052	0.980517	0.866014	0.463987	0.120675	0.0360375	0.0200102	1	0.993948	1.01234	0.912801	0.517907	0.164873	0.0555215	0.0439816	11.356	-0.18065	0	0.991943	12.1424	-0.198628	0.0156973	0.999806	11.5825	-0.179326	0	0.996806	12.0309	-0.173472
O75586	MED6	4	6	1	0.897564	1.01298	0.985311	0.627467	0.31099	0.143288	0.0524579	1	0.868739	0.970987	0.974627	0.635464	0.322094	0.137678	0.0274733	1	0.971888	0.993738	1.01024	0.685476	0.327631	0.122598	0.0578481	1	0.979614	1.0046	0.965923	0.713406	0.329157	0.137689	0.0449406	13.0681	-0.140561	0	0.989049	13.1062	-0.142665	0	0.981231	13.3856	-0.148351	0	0.997672	13.4932	-0.147526
O75592	MYCBP2	31	40	1	1.00601	0.977	0.856007	0.444113	0.156206	0.0535872	0.0300284	1	1.02788	1.02751	0.898498	0.403685	0.131891	0.0876435	0.0660267	1	1.00108	0.998359	0.849267	0.295887	0.169805	0.0628696	0.0314834	1	1.01311	1.02518	0.874925	0.378402	0.137637	0.0819662	0.0630058	11.4897	-0.165205	0	0.998769	11.3855	-0.193973	0.0469641	0.998723	10.8268	-0.197646	0.0391242	0.997371	11.2095	-0.188408
O75600-2	GCAT	7	6	1	0.997437	0.979142	0.899589	0.525322	0.264145	0.197789	0.113543	1	1.00566	0.991866	0.933437	0.568814	0.222399	0.132822	0.0394366	1	1.02778	1.06802	0.911703	0.512661	0.278689	0.185589	0.0975581	1	1.03004	0.988104	0.964695	0.56808	0.252928	0.137563	0.062072	12.2296	-0.135005	0.0748644	0.998657	12.455	-0.150293	0	0.998973	12.2383	-0.136785	0.0654492	0.99388	12.5436	-0.153545
O75607	NPM3	9	10	1	1.08142	1.16381	1.25634	0.983716	0.774939	0.636113	0.288129	1	1.0315	1.13416	1.19821	0.826437	0.606043	0.511138	0.296363	1	1.05637	1.17896	1.19289	0.918059	0.72211	0.539298	0.283153	1	1.01964	1.13712	1.14302	0.895384	0.557119	0.388738	0.274724	18.7303	-0.095145	0	0.844115	16.8973	-0.0834209	0.185968	0.900791	17.9477	-0.086812	0	0.893404	15.6999	-0.121907
O75608	LYPLA1	15	12	1	1.1078	1.1707	1.15549	1.00229	0.947425	1.02725	0.638407	1	1.09751	1.04113	1.09687	0.895815	0.645323	0.687365	0.619768	1	1.07198	1.10582	1.11861	1.11154	0.750261	0.768945	0.583699	1	1.02817	1.12742	1.12067	0.890979	0.615665	0.589177	0.581819			0	0.655849		-0.895127	0.650819	0.922226		-0.20942	0.675958	0.801245		-0.142508
O75616	ERAL1	18	18	1	1.02911	1.03133	0.957756	0.51262	0.173221	0.0630739	0.0308974	1	0.995206	0.970293	0.893934	0.487503	0.13637	0.0416252	0.025166	1	0.978243	0.979545	0.89315	0.553856	0.170651	0.0646884	0.0364349	1	1.00028	0.989556	0.909127	0.517761	0.155608	0.0465276	0.0194119	12.0999	-0.185004	0.00837721	0.99863	11.8028	-0.181416	0	0.997996	12.1753	-0.168724	0	0.996923	12.0144	-0.181077
O75629	CREG1	1	3	1	0.955036	0.918994	0.97754	0.724316	0.663914	0.603832	0.471147	1	1.06677	1.17226	1.16087	0.870472	0.520485	0.480861	0.447259	1	1.20384	1.09129	1.15112	0.891491	0.684372	0.597877	0.545568	1	0.989426	1.06129	0.957819	0.572893	0.463506	0.361965	0.348178	20.7561	-0.0451973	0.113891	0.940177	15.5075	-0.161411	0.45991	0.910388		-0.0837874	0.543171	0.840485	13.1021	-0.13365
O75635-2	SERPINB7		3									1	0.953155	0.849589	1.15961	0.943724	0.641127	0.383137	0.0414074									1	1.05072	1.27213	1.21851	1.00715	0.57178	0.426676	0.104978					16.2586	-0.1379	0	0.932631					16.2969	-0.122106
O75643	SNRNP200	130	122	1	0.989999	0.955893	0.85271	0.405713	0.0739496	0.0334596	0.0235037	1	0.984031	0.955347	0.886323	0.435804	0.105037	0.0457881	0.0361602	1	0.995006	0.96068	0.856663	0.383813	0.0838437	0.0373913	0.0255433	1	1.01823	1.01922	0.89654	0.423221	0.113561	0.0504353	0.0353503	11.2261	-0.190863	0	0.99602	11.5033	-0.186711	0	0.997319	11.1568	-0.191408	0	0.997832	11.4879	-0.188765
O75648	TRMU	17	16	1	0.97931	0.991918	0.887645	0.532464	0.215853	0.108721	0.0508868	1	0.984155	1.00689	0.962283	0.570662	0.240621	0.119713	0.05864	1	1.02783	1.00919	0.92365	0.512518	0.230809	0.104275	0.055142	1	1.01537	1.00607	0.929108	0.599818	0.244732	0.120684	0.0762023	12.1353	-0.145973	0	0.999054	12.5168	-0.158391	0.0259862	0.999401	12.1556	-0.150649	0.00657333	0.99908	12.6317	-0.148906
O75663	TIPRL	18	19	1	0.957252	0.996035	1.00602	0.815482	0.491022	0.0718251	0.00478472	1	0.990623	0.966696	0.973154	0.78074	0.501716	0.184942	0.0422433	1	0.972087	0.993976	1.0123	0.923828	0.49749	0.130549	0.0147485	1	1.00701	1.01104	1.01734	0.821598	0.496715	0.192074	0.0378666	14.5303	-0.173812	0	0.986633	14.5593	-0.134339	0	0.990915	14.9504	-0.193642	0	0.998506	14.7323	-0.143185
O75665	OFD1	1		1	1.0602	0.980754	0.892749	0.629831	0.274134	0.241216	0.127016									1	0.874056	0.883435	0.842753	0.475293	0.2264	0.154543	0.151047									12.8809	-0.121175	0.0566469	0.990236					11.6537	-0.136952	0.0782837	0.967903
O75674	TOM1L1	14	15	1	1.00291	1.05947	1.08491	0.85812	0.876118	0.9661	0.641264	1	0.999496	1.04529	1.09991	0.83237	0.650911	0.659858	0.610265	1	0.992285	1.01792	1.07245	0.837146	0.658096	0.711315	0.556216	1	0.960345	1.04965	1.05114	0.822691	0.589776	0.535043	0.501021			0	0.679349		-0.153873	0.637713	0.951885		-0.0982775	0.626496	0.933291		-0.11027
O75676	RPS6KA4	7	6	1	0.945227	0.974008	0.825997	0.399733	0.101649	0.0504098	0.0351015	1	1.03321	1.05073	1.00222	0.483958	0.182155	0.085284	0.0508659	1	0.961867	0.958279	0.83613	0.470047	0.0984277	0.045209	0.0407622	1	1.02591	1.05528	0.929455	0.515494	0.174154	0.0907205	0.0490993	11.1193	-0.174312	0	0.995617	11.9916	-0.214019	0.0594591	0.995701	11.4647	-0.171749	0	0.991854	12.0616	-0.173982
O75683	SURF6	5	4	1	1.02961	0.973354	0.903742	0.584901	0.383331	0.176171	0.00556587	1	1.0692	0.985879	0.918626	0.518268	0.285833	0.211431	0.0620062	1	0.986996	0.905309	0.830887	0.578182	0.319629	0.215439	0.036491	1	1.04707	0.893827	0.91844	0.541364	0.311266	0.198319	0.0833746	12.9355	-0.122593	0	0.985602	12.3963	-0.126202	0.0184679	0.990594	12.5002	-0.112963	0	0.981096	12.5959	-0.118557
O75688	PPM1B	16	22	1	1.01817	1.01518	1.04651	0.869184	0.832811	0.844799	0.630252	1	1.00871	1.04205	1.01375	0.751754	0.53375	0.531686	0.513388	1	1.02458	1.03527	1.05606	0.839977	0.686881	0.634266	0.56453	1	1.0163	1.05089	1.02132	0.74535	0.50238	0.470092	0.414793		-0.0304643	0	0.870434		-0.193437	0.522763	0.994658		-0.0713964	0.569315	0.972543	14.9632	-0.132312
O75689	ADAP1	4	7	1	0.958497	1.08822	0.947256	0.781424	0.519321	0.272133	0.0676358	1	0.924751	0.924593	1.01946	0.745268	0.453609	0.31663	0.106516	1	1.03955	1.08407	1.05776	0.884452	0.488729	0.251311	0.0842623	1	0.964741	0.995445	0.98283	0.759787	0.424826	0.285438	0.120456	14.8264	-0.11606	0	0.981241	14.5876	-0.1068	0	0.976423	15.0603	-0.136523	0.00023897	0.987371	14.4225	-0.109952
O75691	UTP20	14	11	1	0.987737	0.985479	0.787666	0.386526	0.166601	0.104741	0.0581109	1	1.04609	0.994741	0.87479	0.455412	0.204541	0.15977	0.142538	1	0.969416	0.974914	0.833833	0.405453	0.157311	0.0896916	0.0638247	1	1.01012	1.01546	0.831068	0.432747	0.185798	0.143131	0.140861	11.0193	-0.147833	0.00339919	0.999688	11.584	-0.161855	0.110009	0.997699	11.2371	-0.159222	0.0160164	0.998698	11.3119	-0.156857
O75694	NUP155	44	58	1	1.09684	1.09174	1.05903	0.54716	0.160511	0.0632247	0.0389819	1	0.997238	1.02041	0.955332	0.526101	0.149284	0.0378717	0.0307993	1	1.02689	1.01391	0.913135	0.461919	0.160199	0.0510307	0.0289387	1	0.997555	0.94628	0.951929	0.520601	0.155334	0.0417481	0.0231493	12.2505	-0.241941	0.0478011	0.985382	12.1291	-0.197656	0.00119585	0.999548	11.759	-0.177432	0	0.999245	12.1068	-0.193152
O75695	RP2	8	7	1	0.911032	0.908312	0.931037	0.76334	0.551588	0.30006	0.0789984	1	1.02063	1.01814	1.00186	0.786245	0.50608	0.360182	0.130448	1	1.05415	1.06307	1.07411	0.91487	0.559793	0.316657	0.108865	1	1.0168	1.06181	1.03521	0.81625	0.498089	0.350031	0.129939	14.9656	-0.107182	0	0.961701	15.1657	-0.1	0	0.990401	15.6842	-0.125893	0	0.984589	15.2297	-0.105446
O75716	STK16	1		1	1.14688	1.00379	1.0521	0.668068	0.308393	0.195257	0.104453									1	1.04799	1.08904	1.00718	0.756688	0.280853	0.142702	0.061757									13.1849	-0.161895	0.103317	0.977431					13.4546	-0.181115	0.0517846	0.991636
O75717	WDHD1	46	52	1	0.998852	1.02873	0.975905	0.55198	0.168853	0.0860076	0.0543488	1	0.973809	1.00444	0.984139	0.561662	0.1648	0.061161	0.0393993	1	1.01423	1.00562	0.976974	0.547494	0.170477	0.0811375	0.0474354	1	0.977364	1.02022	0.972328	0.575561	0.171784	0.0657438	0.0432294	12.2674	-0.204986	0.0455633	0.999359	12.3202	-0.206917	0.0253336	0.999406	12.2565	-0.201305	0.0376187	0.999749	12.387	-0.199638
O75718	CRTAP	9	10	1	0.965332	0.933191	0.879181	0.490303	0.138949	0.0487718	0.0154446	1	1.05179	1.01482	0.911775	0.503174	0.141797	0.0208628	0.0049461	1	0.983142	0.985529	0.902731	0.537808	0.160318	0.0576159	0.0303433	1	0.977636	0.994593	0.901974	0.484919	0.148778	0.0416612	0.00881489	11.7728	-0.176109	0	0.993605	11.9425	-0.194118	0	0.996487	12.1038	-0.175238	0	0.998032	11.8281	-0.1823
O75746	SLC25A12	20	25	1	1.00452	0.978972	0.88156	0.465488	0.138375	0.0626616	0.0458628	1	0.998513	0.959957	0.905392	0.470901	0.157013	0.0802599	0.0628343	1	0.994453	0.976184	0.87134	0.451992	0.138091	0.0600626	0.0348404	1	1.02152	1.01877	0.915286	0.487865	0.164938	0.0765123	0.0497444	11.6555	-0.170524	0	0.998749	11.7571	-0.174486	0.0244182	0.998473	11.5589	-0.170528	0	0.998801	11.8855	-0.172973
O75752	B3GALNT1	2	1	1	1.06686	1.018	1.02451	0.671861	0.383454	0.209759	0.077809	1	1.11939	1.11851	0.87066	0.563658	0.442563	0.270778	0.114479	1	0.948212	0.916273	0.884106	0.623178	0.310949	0.161883	0.0543689	1	1.03585	1.21354	1.16475	0.722879	0.4335	0.317743	0	13.6922	-0.124023	0	0.990171	13.2382	-0.0959453	0	0.963064	12.8705	-0.126283	0	0.98727	14.374	-0.124288
O75771-8	RAD51D		2									1	0.962319	1.03269	0.784532	0.471581	0.175252	0.0831692	0.0218613									1	0.869186	0.739344	0.783395	0.496133	0.186115	0.061574	0.03074					11.3695	-0.145689	0	0.992945					11.3815	-0.13932
O75781	PALM	5	7	1	1.10441	1.18644	1.14533	0.873333	0.763801	0.847241	0.622736	1	0.982957	1.01756	0.982886	0.691894	0.520944	0.516219	0.428301	1	1.01518	1.03039	1.00028	0.779523	0.604532	0.514876	0.437925	1	0.973415	0.976854	1.00016	0.706558	0.461588	0.420024	0.3858					15.8967	-0.112317	0.455991	0.991731	17.8949	-0.0765854	0.394635	0.99311	14.0893	-0.141008
O75787	ATP6AP2	8	8	1	0.986635	1.01333	0.970699	0.613192	0.212726	0.0640433	0.0460003	1	1.02183	0.952777	1.04137	0.588712	0.238723	0.101432	0.0556059	1	1.05728	1.07792	0.989361	0.641224	0.248415	0.0936829	0.0448418	1	0.922465	1.07098	0.977434	0.654731	0.237415	0.105734	0.0563405	12.647	-0.179772	0.00778509	0.999552	12.609	-0.185027	0.0490763	0.993574	12.8912	-0.168219	0.00832478	0.993156	12.8959	-0.175333
O75792	RNASEH2A	11	13	1	0.916545	0.876824	0.877864	0.616633	0.259616	0.0601623	0.0220638	1	0.972254	0.949226	0.948354	0.643479	0.281441	0.0845095	0.0385495	1	0.999582	1.00837	1.00858	1.05136	0.278201	0.0832041	0.0316427	1	0.982016	1.00211	0.974611	0.680277	0.295066	0.0870914	0.0408546	12.6336	-0.155106	0	0.973313	12.9498	-0.156498	0	0.996187	14.6281	-0.695359	0.057258	0.997255	13.187	-0.160424
O75794	CDC123	9	18	1	0.974405	0.944821	0.896591	0.573682	0.258632	0.116103	0.042419	1	0.992806	1.03868	0.987256	0.656049	0.337335	0.181428	0.0837504	1	0.96226	1.04332	0.984971	0.708731	0.33345	0.177235	0.0709714	1	0.971531	1.04381	0.999264	0.665072	0.322871	0.191263	0.0945761	12.4636	-0.141022	0	0.995607	13.3391	-0.131601	0.0148884	0.997224	13.5603	-0.138032	0.00738814	0.996384	13.2882	-0.141627
O75808	CAPN15	4	1	1	1.08934	1.06548	1.1195	0.767059	0.61738	0.532284	0.381657	1	1.01307	0.891723	1.18822	0.777649	0.386121	0.138493	0	1	1.04071	1.07833	1.13938	0.854121	0.511896	0.450413	0.32765	1	0.901003	1.09043	1.00659	0.540435	0.315147	0.117137	0	17.3463	-0.0792332	0.352978	0.930171	14.0345	-0.164419	0	0.95982	15.3266	-0.127644	0.351609	0.954554	12.6465	-0.148592
O75815	BCAR3	4	4	1	0.993669	1.05833	1.06809	0.670854	0.319032	0.133746	0.0708823	1	1.02913	1.06153	1.09439	0.640528	0.256796	0.11251	0.0421405	1	0.976616	1.01789	1.07438	0.802228	0.292481	0.123249	0.0582269	1	0.976766	0.976545	1.01549	0.677205	0.247787	0.106862	0.0563491	13.288	-0.157205	0.0358236	0.98999	12.9219	-0.182871	0.0397998	0.986829	13.6526	-0.1956	0.0490331	0.994427	13.0233	-0.182169
O75817	POP7	3		1	0.952397	1.03695	1.01944	0.557178	0.255762	0.192534	0.0875924									1	0.930046	1.01582	1.02922	0.523548	0.230105	0.126235	0.0921726									12.4465	-0.181588	0.117814	0.991233					12.2124	-0.207824	0.105	0.991846
O75818	RPP40	6	9	1	0.939456	0.953078	0.927364	0.725218	0.57801	0.500961	0.202601	1	1.04696	0.973338	0.886665	0.630888	0.469735	0.418782	0.206694	1	0.976769	0.962186	0.948792	0.80417	0.520318	0.412463	0.177284	1	1.02793	0.975103	0.936328	0.767213	0.474432	0.355705	0.181899	15.9886	-0.0709469	0	0.951752	14.4248	-0.0751977	0	0.982337	15.5567	-0.0879164	0	0.985673	14.9472	-0.0902956
O75820	ZNF189	1	1	1	0.854716	0.952847	0.654902	0.364908	0.302635	0.105278	0.116954	1	1.33362	1.02454	0.900559	0.287601	0.15	0.0965615	0.0535459	1	1.01704	1.04154	0.812997	0.519416	0.194634	0.0973993	0.0585004	1	0.986892	0.963737	0.768033	0.306949	0.137785	0	0	10.5021	-0.116662	0	0.96923	10.8783	-0.239616	0.0782644	0.937409	11.7637	-0.139276	0	0.993934	10.5637	-0.181582
O75821	EIF3G	35	37	1	1.00376	1.01542	0.944804	0.546462	0.228193	0.156905	0.097127	1	0.955796	0.966166	0.903486	0.497527	0.173892	0.0894206	0.0781116	1	1.00825	0.996227	0.958337	0.537919	0.193741	0.123887	0.0887167	1	0.934133	0.942536	0.932703	0.490184	0.169695	0.0877841	0.0731565	12.302	-0.164203	0.0809774	0.999377	11.8983	-0.167042	0.0304959	0.996826	12.2051	-0.188839	0.0771462	0.999838	11.9175	-0.183948
O75822	EIF3J	8	20	1	0.994249	1.02702	0.948248	0.612479	0.306436	0.31825	0.305794	1	0.970484	0.931056	0.940775	0.572659	0.265313	0.17033	0.216222	1	0.984805	1.01858	0.959848	0.605522	0.250036	0.207012	0.233559	1	1.01578	1.00956	0.991939	0.614499	0.253576	0.167453	0.17431	12.6013	-0.214634	0.298382	0.99566	12.4162	-0.17203	0.16977	0.991427	12.4798	-0.23281	0.212496	0.997769	12.6072	-0.202871
O75828	CBR3	3	3	1	0.942902	1.08681	1.08862	0.818618	0.341621	0.135342	0.0630906	1	0.985146	1.01314	0.921506	0.843052	0.393436	0.194257	0.0972967	1	1.11441	1.05429	1.07705	0.803495	0.51447	0.171523	0.0592258	1	0.944192	0.971573	1.43315	0.737273	0.414404	0.197677	0.0799672	13.9353	-0.179305	0.0394447	0.985027	14.2824	-0.152837	0.0529681	0.994129	14.7419	-0.141453	0	0.976488	14.1129	-0.151754
O75832	PSMD10	8	13	1	0.964126	0.972584	1.00522	0.660924	0.429178	0.364644	0.117995	1	0.977323	0.986741	0.968154	0.623391	0.332127	0.206589	0.107106	1	0.982105	1.00297	0.979092	0.656351	0.407289	0.277069	0.12283	1	1.01488	0.970329	0.964873	0.696722	0.327325	0.187662	0.105456	14.244	-0.0961142	0	0.975492	13.1353	-0.127883	0.0491404	0.997784	13.8509	-0.104592	0	0.9944	13.4338	-0.138395
O75843	AP1G2	7	9	1	1.00569	0.982183	0.985168	0.675651	0.316235	0.176394	0.152012	1	1.02066	1.00047	0.969165	0.656799	0.218404	0.0170295	0.0154833	1	1.03579	1.02886	1.03644	0.771473	0.28559	0.167455	0.118179	1	0.984532	1.02356	0.948731	0.663592	0.213342	0.0359812	0.0103316	13.1875	-0.156885	0.118765	0.999472	12.8243	-0.197705	0	0.998051	13.4303	-0.198286	0.117047	0.996654	12.8433	-0.194838
O75844	ZMPSTE24	19	30	1	1.06392	1.07485	1.09371	0.909959	0.722456	0.510827	0.124653	1	0.996842	0.980333	1.0202	0.798049	0.60324	0.490371	0.233067	1	1.05087	1.04434	1.0644	0.992128	0.715622	0.513981	0.205142	1	1.00459	1.03033	0.99565	0.825321	0.564579	0.469841	0.256926	17.2483	-0.115598	0	0.954956	16.5931	-0.0773116	0	0.979074	17.5437	-0.106264	0	0.976103	16.4573	-0.077185
O75845	SC5D	2	2	1	1.04931	1.00925	0.951788	0.595315	0.233786	0.0630729	0.0359296	1	1.04615	0.98699	0.936642	0.554454	0.197219	0.060648	0.0203542	1	1.0918	1.0275	0.999336	0.679135	0.208487	0.0922485	0.0567836	1	1.02078	0.987886	0.799959	0.646374	0.271208	0.0820625	0.0127309	12.5953	-0.167418	0	0.997639	12.3061	-0.173934	0	0.997959	12.8869	-0.206194	0.0467195	0.993527	12.6285	-0.140968
O75864	PPP1R37	3	5	1	1.00413	0.964733	0.867863	0.428454	0.123444	0.0683368	0.0255358	1	0.989902	0.972117	1.00624	0.69449	0.304369	0.230989	0.203618	1	1.03155	0.983065	0.752776	0.43329	0.179705	0.0773969	0.0401345	1	1.05669	1.10284	1.09202	0.748057	0.356086	0.231305	0.165402	11.4258	-0.174291	0	0.998414	13.0865	-0.190624	0.202739	0.998772	11.0505	-0.142083	0	0.996099	13.6561	-0.16449
O75865-2	TRAPPC6A	2	2	1	1.23438	1.37518	1.18601	0.912422	0.723746	0.631797	0.286609	1	1.25777	1.31387	1.77276	1.33715	0.655056	0.493856	0.208051	1	1.0015	0.957034	1.06302	1.59835	0.61952	0.419582	0.194638	1	1.22293	1.56174	1.41511	1.01888	0.445001	0.317785	0.166957	18.4978	-0.0815252	0	0.726052	16.9103	-0.141868	0.2112	0.514813	15.4024	-0.349046	0.303639	0.707597	14.7845	-0.274928
O75874	IDH1	44	59	1	0.993775	1.02858	1.01661	0.734622	0.579974	0.45698	0.245927	1	0.952028	0.95106	0.966607	0.684062	0.463041	0.366252	0.251665	1	0.997979	1.03002	1.01219	0.871824	0.523944	0.384582	0.269596	1	1.00931	0.977717	1.00362	0.750521	0.467646	0.358023	0.253733	16.1222	-0.0746079	0	0.979691	14.4309	-0.0941714	0.170354	0.989306	15.4464	-0.116916	0.239253	0.995903	14.6404	-0.107707
O75879	PET112	11	10	1	1.01071	0.963987	0.91455	0.463899	0.10833	0.0181775	0.018551	1	1.03648	1.02584	0.810869	0.425145	0.114579	0.0234494	0.0104289	1	1.0252	1.01301	0.960228	0.486651	0.150139	0.0359492	0.0144207	1	0.936219	0.857353	0.812306	0.413738	0.130324	0.0275686	0.0112443	11.7358	-0.204359	0	0.998021	11.1782	-0.172805	0	0.994477	11.9594	-0.198807	0	0.99921	11.1283	-0.168315
O75880	SCO1	6	8	1	0.922883	0.984408	0.942917	0.582944	0.197244	0.0537595	0.0283246	1	0.997336	1.01801	0.963479	0.602641	0.224927	0.0780055	0.0277345	1	0.984523	0.960196	0.972053	0.6397	0.223161	0.0824422	0.0449307	1	0.991416	0.960804	0.962279	0.615576	0.229084	0.0875919	0.0448992	12.4506	-0.178553	0	0.994804	12.6322	-0.170126	0	0.999621	12.7956	-0.17746	0.011906	0.998583	12.7061	-0.166332
O75882	ATRN	12	9	1	0.95695	0.975984	0.986642	0.818315	0.718344	0.691279	0.464888	1	0.965825	0.941267	0.967465	0.700646	0.511287	0.467704	0.360609	1	1.04627	1.08914	1.0865	0.924138	0.665563	0.538291	0.432124	1	0.967616	1.0864	1.06913	0.791746	0.484427	0.420039	0.347575		-0.0434951	0	0.945719	15.3616	-0.0895431	0.340179	0.984073	18.3446	-0.0893519	0.403647	0.960203	14.7339	-0.132857
O75884	RBBP9	6	10	1	1.07845	1.09781	1.05372	0.853445	0.711305	0.234808	0.0408197	1	0.993154	1.0789	0.978638	0.77369	0.503791	0.346636	0.0456082	1	0.979671	1.00051	1.00615	0.796221	0.624456	0.321786	0.0442557	1	0.999621	1.04016	0.991977	0.764409	0.494531	0.286575	0.0503894	16.073	-0.174429	0	0.969708	14.9069	-0.110165	0	0.974262	15.598	-0.120057	0	0.974787	14.684	-0.116737
O75886	STAM2	12	16	1	0.973846	0.974814	1.05006	0.867653	0.875232	0.758526	0.140718	1	0.98197	1.05288	1.10417	0.87218	0.656168	0.672731	0.275089	1	0.979966	0.980013	1.01287	0.727411	0.733519	0.662258	0.193169	1	0.983599	1.11934	1.07383	0.8403	0.606035	0.576734	0.285275	19.0491	-0.249012	0	0.94104	18.3795	-0.0708087	0	0.900704	17.8889	-0.0689661	0	0.850561	17.5289	-0.0704823
O75896	TUSC2		4									1	0.94783	0.969689	1.08007	0.865559	0.592091	0.524366	0.238307									1	1.09788	1.32059	1.20397	1.12174	0.683675	0.579178	0.29918					16.9561	-0.0808881	0	0.955339					18.0528	-0.098383
O75907	DGAT1	2	3	1	0.971506	1.13178	1.1712	0.90077	0.407133	0.323936	0.249212	1	1.01475	0.911658	0.732909	0.482992	0.220213	0.0949189	0.0808991	1	1.30183	1.43574	1.22304	0.924152	0.535748	0.351912	0.228453	1	1.06982	1.03614	0.959707	0.572956	0.229582	0.124442	0.0657662	14.2948	-0.19906	0.272529	0.950727	11.1934	-0.124235	0	0.988645	15.4246	-0.142209	0.220456	0.768854	12.4851	-0.164031
O75909-4	CCNK	10		1	0.943088	0.97475	0.984773	0.823773	0.535119	0.266312	0.0833439									1	0.991838	1.00576	1.04316	0.895397	0.539186	0.257594	0.0912312									15.1026	-0.122183	0	0.991668					15.3462	-0.135548	0	0.99705
O75909	CCNK		12									1	0.969214	0.968164	0.969715	0.839685	0.490371	0.266755	0.0896691									1	0.993419	1.03371	1.02366	0.850054	0.493777	0.265331	0.114328					14.9454	-0.123439	0	0.995478					15.0425	-0.122969
O75911	DHRS3	6	6	1	1.07713	1.11653	1.04809	0.647828	0.296527	0.0988724	0.0495481	1	1.01293	1.04211	0.949758	0.58015	0.243881	0.121735	0.0703405	1	0.969458	1.03402	1.00845	0.694328	0.260416	0.105874	0.0432008	1	1.01548	0.971033	1.0105	0.525761	0.24772	0.115022	0.0670537	13.1078	-0.160258	0.00614712	0.981917	12.5527	-0.155152	0.0288205	0.998432	13.1594	-0.174566	0.0168199	0.997815	12.3099	-0.178626
O75915	ARL6IP5	9	8	1	0.995563	0.933457	0.969838	0.78914	0.502181	0.263009	0.145945	1	1.01783	1.02855	1.0469	0.74602	0.409898	0.190363	0.0639651	1	0.970667	0.902034	0.914634	0.925858	0.482012	0.256823	0.130361	1	1.01133	1.04711	1.0342	0.786634	0.404391	0.215743	0.0951691	14.8614	-0.108466	0	0.994201	14.0825	-0.134421	0	0.993868	14.9935	-0.155937	0.10438	0.977895	14.2349	-0.136257
O75920-2	SERF1A	1	1	1	0.968811	0.935651	1.01793	0.824074	0.819453	0.85098	0.709696	1	1.07481	1.20553	1.2024	0.750899	0.651588	0.712726	0.677861	1	1.06232	1.1508	1.10706	0.913279	0.725968	0.717926	0.667821	1	1.04543	1.29189	0.981123	0.930662	0.586719	0.5493	0.512676		-0.0194929	0	0.764473		-0.887741	0.680725	0.769243		-0.0859645	0.688745	0.847037		-0.147758
O75923-13	DYSF	5		1	1.00461	1.03868	0.992498	0.755172	0.284834	0.0377955	0.0100437									1	1.05134	1.05388	1.06636	1.00941	0.35741	0.0757459	0.018904									13.4274	-0.193598	0	0.997367					14.5789	-0.364122	0.0389623	0.992673
O75925	PIAS1	7	10	1	1.00654	1.10799	1.04528	0.69953	0.30239	0.123889	0.0742423	1	0.99985	0.985842	0.964259	0.588283	0.203269	0.0595106	0.0288054	1	1.00083	1.08669	1.1089	0.626057	0.324491	0.140706	0.0579788	1	0.942975	1.02522	0.920239	0.548763	0.215596	0.0730453	0.0347957	13.3173	-0.166122	0.041341	0.988135	12.5129	-0.179333	0	0.99974	13.1372	-0.156276	0.0377504	0.977635	12.284	-0.161043
O75928	PIAS2	4	6	1	1.05737	1.02903	1.02657	0.605398	0.256124	0.0848899	0.0310295	1	0.928537	1.10181	1.10898	0.724685	0.305783	0.071681	0.0210494	1	0.969322	0.989398	0.975622	0.859188	0.280865	0.0876967	0.0557866	1	0.956639	1.03571	1.00945	0.674119	0.297917	0.0809739	0.0244624	12.7832	-0.167629	0	0.993837	13.442	-0.178674	0	0.978382	13.7757	-0.224809	0.0433249	0.998778	13.1798	-0.165198
O75934	BCAS2	11	12	1	1.03564	0.971236	0.930563	0.605162	0.381187	0.256859	0.178161	1	1.00975	0.965426	0.857131	0.467877	0.20231	0.0880072	0.0570488	1	0.955301	0.978153	0.846796	0.503821	0.276047	0.177704	0.146943	1	0.993643	0.982117	0.827241	0.459671	0.20977	0.0866095	0.0512441	13.2399	-0.109031	0.0928429	0.996836	11.685	-0.146731	0	0.998867	11.9948	-0.123671	0.0644498	0.997573	11.5486	-0.142659
O75935	DCTN3	13	11	1	0.991407	0.981222	1.00824	0.864886	0.816576	0.911702	0.721853	1	0.950684	0.98905	1.03218	0.820623	0.574828	0.60068	0.574363	1	1.03488	1.00987	1.06737	0.983661	0.73996	0.703522	0.615068	1	0.968868	1.10673	1.04071	0.837943	0.556816	0.537727	0.550827		-0.0176871	0	0.750929		-1.02357	0.58329	0.98614		-0.091767	0.646178	0.958919		-0.197881
O75937	DNAJC8	19	20	1	0.98126	0.978581	0.982408	0.913284	0.86498	0.961763	0.658239	1	0.979996	0.967785	0.968214	0.745776	0.561147	0.555698	0.490354	1	0.994268	1.03214	0.995783	1.01085	0.748261	0.696189	0.588252	1	1.00072	1.01688	0.993177	0.812311	0.548202	0.520147	0.426099			0	0.708974		-0.0924172	0.49585	0.991459		-0.100078	0.62729	0.970426	16.8396	-0.100811
O75940	SMNDC1	11	21	1	0.914293	1.01716	0.999672	0.85809	0.874733	1.03465	0.828013	1	0.979261	0.96171	1.02503	0.795232	0.607146	0.637801	0.639808	1	0.966534	0.994159	1.02197	0.927938	0.746889	0.7312	0.67765	1	0.964225	1.09597	1.00652	0.821996	0.608065	0.573937	0.538083		-0.281999	0.898871	0.278899		-0.942665	0.628251	0.98615		-0.0702687	0.693356	0.980104		-0.101685
O75943	RAD17	6	7	1	0.812746	0.986443	0.851594	0.378293	0.107498	0.0522655	0.0395249	1	0.977038	0.981872	0.875303	0.407258	0.081326	0.0376458	0.0238427	1	1.00872	0.889083	0.81901	0.269903	0.102747	0.0574952	0.0381232	1	0.970552	0.934564	0.842756	0.386767	0.101924	0.0396984	0.0184295	11.1391	-0.18143	0.000690908	0.972094	11.3261	-0.195539	0	0.997994	10.5717	-0.210898	0.030183	0.991173	11.1286	-0.182848
O75947	ATP5H	27	31	1	0.989545	1.00925	1.00417	0.886935	0.762165	0.519109	0.329213	1	1.00423	0.993531	0.986623	0.77716	0.528487	0.488823	0.357715	1	0.981461	0.98027	1.02742	0.830029	0.657159	0.482298	0.310999	1	1.01605	1.00035	0.967877	0.802967	0.531695	0.450585	0.323842	18.2027	-0.0779902	0	0.994547	16.0416	-0.0876416	0.329343	0.991282	17.3157	-0.0723124	0	0.990676	15.9701	-0.0844736
O75953-5	DNAJB5	1		1	1.06654	0.998349	0.965326	0.462275	0.257361	0.0986869	0									1	1.16133	1.14828	0.985898	0.452113	0.178424	0.0657092	0.0363034									12.0588	-0.158092	0	0.989759					11.8444	-0.207968	0.0409415	0.970378
O75954	TSPAN9	3	3	1	1.03334	1.09101	1.07651	0.907923	0.867897	1.07046	0.777854	1	0.890119	0.957231	0.934301	0.78178	0.52946	0.633477	0.580573	1	0.950994	1.09605	1.0298	1.16213	0.726115	0.715366	0.624166	1	0.940721	1.02404	1.05507	0.836483	0.549977	0.547113	0.540727		-0.163612	0.905404	0.343599		-0.961779	0.58117	0.901213		-0.337499	0.669761	0.844143		-0.232914
O75955	FLOT1	7	8	1	1.03796	1.14312	1.05105	0.61647	0.27353	0.167293	0.0926394	1	1.0692	1.09465	1.02359	0.623557	0.259201	0.0950373	0.0599892	1	0.978585	1.01353	0.909577	0.698829	0.264274	0.124272	0.0711991	1	0.954699	1.01928	0.935562	0.572487	0.227239	0.0737184	0.0183939	12.7971	-0.177612	0.101435	0.978513	12.8337	-0.172492	0.0314706	0.988201	13.1574	-0.1543	0.0123727	0.995387	12.4516	-0.164694
O75962	TRIO	29	30	1	0.934781	0.920012	0.889362	0.522148	0.187546	0.0628393	0.0427419	1	1.00374	1.00786	0.966328	0.574831	0.20712	0.0837285	0.0516639	1	1.01554	1.06026	0.983569	0.64579	0.208915	0.0771195	0.0511998	1	1.00652	1.02113	0.99846	0.594224	0.204313	0.0880296	0.0529634	12.0185	-0.160657	0	0.990056	12.4512	-0.176818	0.0221066	0.999903	12.7695	-0.193083	0.0280624	0.99724	12.5372	-0.192463
O75964	ATP5L	12	17	1	1.0658	1.10534	0.94691	0.553109	0.152498	0.0347364	0.0112945	1	1.08611	1.0418	1.00146	0.598331	0.212629	0.0965345	0.0709556	1	1.02993	0.969672	0.932079	0.512316	0.163897	0.043298	0.0202656	1	1.02387	1.05046	0.935142	0.564702	0.198535	0.0961057	0.0637262	12.2479	-0.200698	0	0.990061	12.556	-0.194198	0.057325	0.993046	12.0446	-0.184492	0	0.998413	12.3486	-0.169222
O75976	CPD	51	49	1	0.98804	0.986927	1.03472	0.835594	0.768509	0.7417	0.412334	1	0.985353	1.01546	1.03302	0.784929	0.569714	0.567922	0.405011	1	1.03328	1.02561	1.04513	0.8628	0.694529	0.60913	0.400545	1	1.0273	1.0416	1.03989	0.832528	0.568218	0.510209	0.367696	20.7998	-0.0527222	0	0.903242	17.6497	-0.085505	0.423123	0.971716	19.1934	-0.0584863	0	0.973325	16.6836	-0.0896757
O76003	GLRX3	19	23	1	0.958421	0.932593	1.00137	0.797189	0.779185	0.56432	0.0779749	1	0.992021	1.05718	1.03009	0.771393	0.570555	0.527495	0.165925	1	1.01999	0.976761	0.939957	0.948808	0.686667	0.502898	0.111445	1	0.984426	1.01072	1.0113	0.778001	0.57128	0.449768	0.176975	17.5972	-0.129162	0	0.899904	16.2498	-0.080336	0	0.946034	17.054	-0.115637	0	0.966921	15.9377	-0.0849572
O76021	RSL1D1	28	21	1	0.967318	0.919749	0.752145	0.342118	0.085156	0.0275554	0.016578	1	1.00121	0.943623	0.732667	0.316943	0.0824202	0.0322011	0.0161455	1	0.943536	0.938949	0.723194	0.32904	0.0892523	0.0340014	0.0231152	1	0.995834	0.937204	0.708291	0.308192	0.0902727	0.035699	0.0211272	10.5582	-0.17638	0	0.992493	10.3973	-0.178589	0	0.996545	10.3968	-0.172402	0	0.993286	10.2678	-0.173949
O76024	WFS1	19	14	1	1.02762	0.998468	0.998257	0.757618	0.438238	0.207086	0.0568818	1	1.00959	0.989943	0.94275	0.651373	0.369913	0.238258	0.111528	1	1.03374	0.995025	0.983499	0.586501	0.433259	0.217412	0.0751273	1	1.00043	1.02652	0.94117	0.659345	0.349503	0.198996	0.0844686	14.2422	-0.129555	0	0.996174	13.5086	-0.110542	0	0.998515	13.4255	-0.111938	0	0.985033	13.3796	-0.121392
O76027	ANXA9	1		1	1.11189	1.18974	1.17031	0.879028	0.407138	0.124022	0.0814306									1	0.972766	1.21631	1.35625	0.83776	0.474876	0.156847	0.103559									14.3962	-0.187628	0.0451787	0.948897					14.6691	-0.158751	0.0386972	0.883922
O76031	CLPX	29	35	1	0.977001	0.94522	0.85652	0.440363	0.0889186	0.0262029	0.0157808	1	0.982906	0.96732	0.890038	0.481437	0.127067	0.0439195	0.0327642	1	0.976317	0.967759	0.849526	0.43062	0.11018	0.0342452	0.0209651	1	1.00342	0.964113	0.885459	0.467712	0.136283	0.0503136	0.0325486	11.4102	-0.187591	0	0.993959	11.7508	-0.181317	0	0.997452	11.3522	-0.179002	0	0.996657	11.677	-0.176064
O76039	CDKL5	4		1	1.01895	1.01122	0.982015	0.64266	0.405254	0.392586	0.303922									1	1.08003	1.0445	0.977881	0.757795	0.394342	0.354784	0.284153									13.367	-0.140848	0.327543	0.995154					13.8211	-0.156292	0.296374	0.987391
O76041-2	NEBL	9	9	1	0.970516	0.986133	0.992892	0.833049	0.811105	0.768501	0.565307	1	0.98789	0.987532	0.904097	0.657062	0.41815	0.366588	0.278489	1	1.02295	0.986306	1.01114	0.908827	0.603347	0.594471	0.460032	1	1.00009	1.01021	0.902918	0.667055	0.408772	0.325019	0.238446		-0.0337247	0	0.920502	13.9282	-0.0942426	0.202739	0.997372		-0.104824	0.497427	0.978417	13.8701	-0.094731
O76054	SEC14L2	15	10	1	0.998548	0.998003	1.0409	0.83598	0.803818	0.589423	0.105551	1	0.989421	0.992074	0.971336	0.787412	0.553178	0.4972	0.145186	1	1.05675	1.0384	1.06298	1.03028	0.721576	0.582548	0.168477	1	1.02352	1.01603	0.964922	0.778406	0.548343	0.426113	0.185995	17.9601	-0.139493	0	0.931903	15.9488	-0.0837802	0	0.959957	17.8234	-0.113217	0	0.952723	15.6973	-0.0841952
O76061	STC2	1	1	1	1.03705	1.21014	1.15835	0.934579	0.811279	0.744915	0.354506	1	0.874011	0.914635	0.896798	0.739646	0.529631	0.381827	0.453944	1	0.899	1.13204	1.02963	0.629377	0.660702	0.561563	0.393636	1	1.5827	1.27101	1.32376	0.816647	0.623915	0.546152	0.274989	19.7695	-0.0889021	0	0.827698	15.9365	-0.0770646	0.320074	0.92057	19.2402	-0.0890258	0.47196	0.867576	17.2763	-0.080001
O76062	TM7SF2		3									1	1.09513	1.03142	0.923234	0.573042	0.196934	0.108974	0.0832507									1	1.00289	1.07197	0.889356	0.550662	0.189473	0.111817	0.0619816					12.3584	-0.168449	0.0422181	0.991538					12.1883	-0.150234
O76064	RNF8	4	4	1	1.08881	1.06766	1.06918	0.722735	0.489558	0.230691	0.0761187	1	1.03475	1.02022	0.939291	0.674985	0.41441	0.370355	0.252526	1	0.997413	0.98808	0.927228	0.688063	0.443466	0.204237	0.0939735	1	0.960952	0.971556	0.951497	0.739564	0.396329	0.312338	0.194517	14.437	-0.119673	0	0.975215	13.972	-0.102669	0.209589	0.993702	13.8706	-0.112732	0	0.995087	14.086	-0.114983
O76070	SNCG	8	9	1	1.00763	1.02952	1.05081	0.904555	0.953612	1.16272	0.980027	1	0.966102	1.0113	1.02064	0.808261	0.630941	0.714025	0.68934	1	0.991719	0.999277	1.04725	0.949081	0.81681	0.884304	0.808947	1	0.971247	1.14616	1.01822	0.863912	0.572002	0.65463	0.643467			1.01354	0.00420571		-0.661519	0.678102	0.971106		-0.38894	0.836687	0.898992		-0.943883
O76071	CIAO1	12	14	1	0.994928	1.07332	0.99791	0.621015	0.390739	0.290335	0.228732	1	0.990204	0.982474	1.00235	0.610413	0.28796	0.220213	0.207947	1	1.01119	1.06809	0.986138	0.663611	0.335909	0.240427	0.206112	1	1.03804	1.0921	1.02625	0.618788	0.2895	0.227482	0.163909	13.2079	-0.135912	0.225495	0.990508	12.6367	-0.196527	0.205734	0.999181	13.1581	-0.15541	0.191398	0.995062	12.7401	-0.18632
O76074	PDE5A		2									1	0.974729	1.03485	1.03693	0.76459	0.555086	0.385627	0.189638									1	1.15209	1.19284	1.15087	0.954032	0.536004	0.367814	0.240532					15.5915	-0.0892582	0	0.985441					15.4324	-0.153269
O76075	DFFB	3	6	1	0.900062	1.01421	1.1223	0.859015	0.796021	0.605083	0.115309	1	0.955857	0.973441	1.04821	0.792497	0.648304	0.606715	0.245196	1	0.950079	0.995502	0.977278	0.856366	0.70248	0.523071	0.21554	1	1.04507	1.02568	1.09126	0.883841	0.608972	0.554713	0.259548	18.0337	-0.135952	0	0.90545	17.5753	-0.0695106	0	0.924378	17.3501	-0.0863643	0	0.971572	17.3547	-0.0782364
O76080	ZFAND5	7	7	1	0.988532	1.02673	1.0871	0.891	1.01585	1.25035	0.887424	1	0.949062	1.08058	1.02141	0.825742	0.679907	0.730878	0.703711	1	0.872957	1.04256	1.11666	0.803183	0.866909	0.949283	0.850542	1	0.972151	1.03048	1.03132	0.950464	0.608733	0.634437	0.563715		0.0824141	1.02641	0.0159209		-0.76717	0.704832	0.938153		-0.0528358	0.868018	0.429659		-0.196989
O76083	PDE9A		1									1	1.02198	1.07062	1.23222	0.750883	0.287993	0.207518	0.113829									1	0.868507	1.17769	0.907834	0.670279	0.268582	0.157154	0.0991929					13.3363	-0.204955	0.142992	0.953135					13.0345	-0.143672
O76094	SRP72	36	34	1	0.944282	0.961652	0.852297	0.354462	0.0562844	0.0278971	0.019531	1	0.996675	1.00942	0.933372	0.429573	0.108517	0.0566848	0.0392786	1	1.00508	0.950744	0.881178	0.357635	0.0765848	0.0274711	0.0199216	1	1.00941	1.01035	0.942626	0.434192	0.12155	0.0578924	0.0434933	11.0047	-0.204228	0	0.995275	11.6093	-0.212429	0.0230339	0.999786	11.1375	-0.207976	0	0.998026	11.6547	-0.213317
O76095	JTB	1	2	1	1.11421	0.953608	1.02074	0.838112	0.751535	0.680322	0.646059	1	0.975545	1.00296	1.03368	0.6531	0.534034	0.578127	0.544095	1	0.996696	0.996945	1.05854	0.924356	0.677916	0.575295	0.569646	1	1.10671	1.06984	1.21184	0.890755	0.531043	0.459628	0.364658		-0.0534962	0.633405	0.914659		-0.972517	0.552085	0.992467		-0.0973338	0.557423	0.987691	15.5444	-0.137577
O77932	DXO	3	3	1	1.02077	1.04656	1.019	0.814656	0.902754	0.711541	0.595689	1	1.02623	1.05332	0.976401	0.621991	0.496234	0.577707	0.477051	1	1.01204	1.0481	1.08451	1.05019	0.651386	0.684216	0.625497	1	0.956271	0.956251	0.929147	0.758161	0.465497	0.363422	0.357908		-0.0363454	0	0.88554		-0.165165	0.514065	0.979288		-0.381912	0.653223	0.951261	14.6464	-0.108922
O94760	DDAH1	17	21	1	1.02096	0.987787	1.04571	0.884335	0.833056	0.833503	0.509821	1	0.997187	1.06682	1.05744	0.826317	0.662369	0.667741	0.519891	1	0.958563	1.00566	0.993396	0.853929	0.73772	0.679731	0.474027	1	0.97778	1.02887	1.00774	0.811155	0.594339	0.564652	0.440385		-0.0538167	0	0.874721		-0.0699946	0.548811	0.943218		-0.0460355	0	0.96813	18.7595	-0.0787842
O94761	RECQL4	16	13	1	0.998083	1.00442	0.906056	0.507867	0.222316	0.0919467	0.0541803	1	0.997642	1.01654	0.930719	0.558034	0.257631	0.148161	0.0875228	1	1.00219	0.981356	0.926801	0.640129	0.226833	0.0921046	0.0559825	1	0.98154	1.06311	0.897346	0.530674	0.267271	0.136965	0.0875968	12.0713	-0.150031	0	0.99986	12.4514	-0.144176	0.0407662	0.999627	12.783	-0.161976	0.00107614	0.99823	12.2904	-0.133585
O94762	RECQL5	13	9	1	1.00556	1.04226	0.940415	0.498052	0.169475	0.0899185	0.0618643	1	1.03653	0.989302	0.946769	0.513693	0.152962	0.084297	0.0574845	1	0.963911	1.0237	0.943671	0.501747	0.158387	0.0901041	0.0530819	1	0.98745	1.00398	0.895995	0.444041	0.147627	0.0637242	0.0569426	11.9762	-0.185862	0.0410293	0.998645	12.0448	-0.196973	0.0395995	0.998765	11.9902	-0.190767	0.0373778	0.998467	11.6001	-0.177204
O94763-4	URI1	1	1	1	1.17047	1.15521	1.02684	0.696191	0.256073	0.0827369	0.157769	1	0.787732	0.986826	0.992062	0.679377	0.175398	0.182354	0.192171	1	0.956687	0.916822	0.99557	0.508881	0.331105	0.147607	0.121584	1	1.25908	1.10402	1.06661	0.750803	0.312986	0.233092	0.144182	12.9776	-0.211673	0.110567	0.960436	12.0882	-2.06933	0.183308	0.955504	12.3941	-0.153305	0.106564	0.981534	13.4532	-0.182844
O94763	URI1	11	19	1	0.964755	0.931188	0.937787	0.698321	0.427794	0.2213	0.0749172	1	1.01134	1.03065	1.03558	0.695671	0.353759	0.196359	0.109078	1	0.987288	0.960537	0.947414	0.736566	0.359157	0.181691	0.081577	1	1.00608	1.08955	1.01531	0.688672	0.32913	0.174535	0.0997661	13.8936	-0.115515	0	0.989311	13.5544	-0.142094	0.0710311	0.99511	13.7667	-0.131743	0	0.997533	13.394	-0.14817
O94766	B3GAT3	8	7	1	0.985615	0.990306	0.990647	0.63373	0.325843	0.129944	0.0480866	1	1.02591	1.03697	0.951911	0.595149	0.336469	0.189956	0.101388	1	0.972431	1.01668	0.970266	0.677938	0.336356	0.135994	0.0560115	1	0.978152	0.988557	1.00057	0.656941	0.317664	0.18562	0.0983136	13.1301	-0.142007	0	0.997413	12.9998	-0.123268	0.0228847	0.996704	13.36	-0.140956	0	0.998454	13.2126	-0.144468
O94768	STK17B	1	2	1	0.896552	0.973877	0.885168	0.531612	0.175137	0.0516646	0.00418352	1	0.933533	0.984729	0.840808	0.45217	0.154615	0.0500417	0.0268921	1	1.01626	1.09649	0.911418	0.592988	0.218146	0.0449775	0.0340551	1	1.05154	1.02018	0.854781	0.50065	0.156408	0.051786	0.0189621	12.0494	-0.171332	0	0.988036	11.4669	-0.162942	0	0.99455	12.4899	-0.169417	0	0.990932	11.763	-0.165286
O94776	MTA2	37	39	1	0.971326	0.979647	0.983421	0.728431	0.518909	0.253957	0.0385403	1	0.981967	1.01664	0.989469	0.676696	0.431904	0.263111	0.0599707	1	1.01169	0.982658	1.02916	0.782099	0.494274	0.271757	0.0735969	1	1.00256	0.999091	0.993155	0.723985	0.417117	0.249736	0.08595	14.5373	-0.116898	0	0.981963	13.9536	-0.113387	0	0.989352	14.7712	-0.119215	0	0.991957	14.1157	-0.116971
O94782	USP1	9	7	1	1.01057	0.992001	0.988891	0.707493	0.358839	0.217602	0.107272	1	0.997635	1.02357	0.888794	0.583055	0.292375	0.173342	0.105391	1	0.983902	1.04174	1.05748	0.727711	0.370926	0.182237	0.0947791	1	1.01969	0.965198	0.965184	0.625299	0.315943	0.154709	0.0800444	13.6814	-0.130014	0.045957	0.998562	12.6611	-0.120136	0	0.999089	13.788	-0.142652	0.0439633	0.992622	13.0682	-0.13284
O94788	ALDH1A2	7	9	1	0.967871	0.96252	0.98065	0.869716	0.761595	0.71286	0.563125	1	0.960791	0.987502	1.02164	0.799651	0.497824	0.508404	0.439473	1	0.991659	0.979363	1.01535	1.02044	0.659482	0.608818	0.507953	1	1.01395	1.07167	1.02133	0.793483	0.502417	0.461139	0.40663		-0.0364601	0	0.97144	15.063	-0.171347	0.469714	0.99023		-0.201913	0.556354	0.98117	15.106	-0.132801
O94804	STK10	23	25	1	1.01926	1.0606	1.06997	0.849929	0.73762	0.555305	0.0735919	1	1.00149	0.988763	0.967082	0.738433	0.520688	0.423821	0.0769023	1	1.0123	1.05516	1.06472	0.766482	0.643553	0.478486	0.120451	1	1.04905	1.03786	1.04035	0.78076	0.523731	0.388719	0.109114	17.3564	-0.121019	0	0.929977	15.0986	-0.0939896	0	0.963967	16.2879	-0.0912298	0	0.945202	15.3164	-0.100257
O94808	GFPT2	12	15	1	1.02217	1.00819	0.935526	0.562639	0.166914	0.0306416	0.014829	1	1.0291	1.01389	0.957609	0.554527	0.182815	0.0876657	0.0539881	1	1.03087	1.02968	1.01333	0.666297	0.190925	0.0531009	0.0164534	1	0.98559	1.04297	0.958793	0.541739	0.184751	0.0772107	0.0456047	12.2954	-0.193646	0	0.998585	12.2951	-0.185815	0.0326719	0.999213	12.8353	-0.206229	0.00133265	0.998303	12.2468	-0.182769
O94811	TPPP	1	5	1	1.04798	0.998095	1.08782	0.960949	0.856517	0.554471	0.273513	1	0.918896	1.03835	1.14142	0.887929	0.620607	0.497063	0.30505	1	1.01859	0.960376	1.05401	0.913885	0.700328	0.527775	0.218844	1	0.964861	1.11702	1.1241	0.812958	0.521319	0.398116	0.275718	18.4463	-0.112465	0	0.981263	17.0252	-0.0878834	0.195859	0.941941	17.497	-0.0934854	0	0.976959	15.3093	-0.111678
O94812	BAIAP3	1		1	1.16471	1.13533	1.12767	0.702502	0.258606	0.203507	0.0858101									1	1.11703	1.01042	0.986001	0.859043	0.194594	0.105617	0.079493									13.0788	-0.203121	0.123808	0.954208					13.3689	-0.293262	0.0856626	0.990268
O94817	ATG12	5	4	1	0.994146	1.04761	1.08949	0.681546	0.280247	0.0903044	0.0233239	1	1.00528	1.09876	1.01153	0.709658	0.268737	0.0639519	0.0104365	1	1.04446	1.1189	1.11462	0.754217	0.307407	0.102926	0.035761	1	0.978982	1.02598	0.9802	0.670396	0.259301	0.0847097	0.0216708	13.2064	-0.173839	0	0.989706	13.2239	-0.183676	0	0.992253	13.5921	-0.176623	0.00614637	0.978882	13.039	-0.171077
O94819	KBTBD11	2	6	1	0.971752	0.924506	0.902625	0.702144	0.3206	0.325304	0.133115	1	0.976986	1.07602	1.09547	0.780368	0.406897	0.146241	0.0585233	1	1.07816	0.990084	1.09316	0.812846	0.536112	0.194367	0.158423	1	0.996753	1.09948	1.06259	0.805451	0.403269	0.155051	0.0760909	13.6688	-0.102108	0.0154748	0.974414	14.1445	-0.15008	0	0.98534	14.9619	-0.127897	0.0339389	0.978477	14.2158	-0.151673
O94822-3	LTN1	3	2	1	1.00599	1.07256	1.09874	0.740952	0.510422	0.354742	0.138133	1	0.920179	0.929437	0.936493	0.550092	0.222533	0.101258	0.05206	1	0.983302	1.10342	1.05865	0.743141	0.404412	0.217271	0.146947	1	1.14725	1.18869	1.02349	0.549225	0.254541	0.115771	0.0513684	15.0886	-0.0997057	0	0.968612	12.3462	-0.154974	0.0036282	0.990409	13.9889	-0.137389	0.0990449	0.984148	12.4758	-0.173002
O94826	TOMM70A	57	57	1	0.980574	0.981414	0.984415	0.746826	0.354091	0.0671138	0.0130438	1	0.988209	0.994837	1.01756	0.724682	0.376557	0.118103	0.0184399	1	0.973261	0.9825	0.975187	0.872442	0.378323	0.102878	0.0224718	1	0.972887	1.01128	0.993086	0.742984	0.378077	0.127027	0.028622	13.6447	-0.168888	0	0.995677	13.7047	-0.152553	0	0.995393	14.2587	-0.188644	0	0.99865	13.7926	-0.150966
O94827-6	PLEKHG5	3		1	1.02836	1.05495	0.941058	0.548605	0.197301	0.080356	0.0317305									1	0.941154	0.899389	0.8124	0.569949	0.148524	0.0672604	0.0482847									12.2936	-0.168397	0	0.997247					11.9346	-0.151711	0	0.974195
O94829	IPO13	8	5	1	1.00508	1.00849	0.959041	0.635431	0.308941	0.117444	0.046815	1	1.04345	1.0218	0.897094	0.59046	0.332446	0.147128	0.102835	1	1.04	1.01254	0.989675	0.753676	0.268532	0.121533	0.0548743	1	0.97884	0.984187	1.05749	0.613587	0.238831	0.119951	0.0958154	13.033	-0.144323	0	0.999021	12.8063	-0.120471	0	0.99673	13.3942	-0.185484	0.0397891	0.998396	12.6517	-0.20227
O94830	DDHD2	6	8	1	1.04864	1.01688	1.07101	0.697823	0.323582	0.200306	0.0770313	1	1.04407	1.02411	0.958401	0.633006	0.379975	0.257656	0.133393	1	0.982337	1.01208	1.01048	0.702241	0.369287	0.17473	0.0876477	1	1.03371	0.921676	0.91965	0.636465	0.352104	0.212021	0.115745	13.452	-0.15371	0.0682044	0.988766	13.488	-0.11016	0.0400943	0.994795	13.6926	-0.13238	0.00653436	0.997745	13.2651	-0.111935
O94832	MYO1D	15	19	1	1.0855	1.15041	1.00013	0.468246	0.172588	0.0933537	0.0489882	1	1.10322	1.1607	1.03879	0.491846	0.176678	0.103825	0.0713735	1	1.07018	1.12823	0.953522	0.440081	0.133306	0.0602451	0.054734	1	1.12246	1.15761	1.04254	0.521834	0.191527	0.110059	0.073521	11.907	-0.223058	0.0655849	0.979873	12.0083	-0.254526	0.092391	0.974728	11.7052	-0.21807	0.0417165	0.986725	12.1522	-0.235762
O94842	TOX4	11	11	1	0.936628	0.977641	0.909411	0.553787	0.324482	0.223334	0.126738	1	1.01106	0.937168	0.795509	0.448746	0.20403	0.128353	0.0847171	1	0.971541	0.971746	0.891224	0.531542	0.305223	0.184985	0.131958	1	0.975258	0.918346	0.810143	0.497325	0.203336	0.118941	0.0896335	12.6631	-0.117652	0.0557574	0.993847	11.3755	-0.130427	0	0.996899	12.3819	-0.122838	0.0553376	0.998266	11.6439	-0.130238
O94851-4	MICAL2	8		1	1.01888	1.09799	0.956008	0.565642	0.268517	0.130991	0.0656679									1	1.011	0.988405	0.963936	0.542527	0.208884	0.0986553	0.0713078									12.5734	-0.14672	0.0203265	0.991691					12.279	-0.178417	0.0483855	0.99968
O94851	MICAL2		4									1	1.01054	0.972893	0.872927	0.478636	0.204824	0.119794	0.0704885									1	1.04347	1.05372	0.942104	0.43365	0.190944	0.108797	0.0732918					11.7983	-0.145361	0.014112	0.999282					11.6725	-0.192663
O94854	KIAA0754	6	4	1	0.945318	1.01541	0.913031	0.610813	0.31301	0.232945	0.169399	1	0.966727	0.92845	0.972707	0.535401	0.253135	0.161026	0.0766571	1	0.938131	1.05092	0.97805	0.6486	0.317465	0.156333	0.128775	1	0.965861	1.08296	0.979252	0.612436	0.29613	0.135903	0.072297	12.88	-0.124934	0.111786	0.995632	12.3544	-0.160905	0.0730279	0.99215	13.1025	-0.147175	0.0792388	0.993628	12.9179	-0.144373
O94855-2	SEC24D	26	29	1	1.02004	1.03561	1.05341	0.874372	0.58125	0.168985	0.0386676	1	0.95721	1.00884	1.00457	0.780571	0.527347	0.245919	0.0256649	1	1.003	1.0187	1.03979	0.861712	0.602741	0.207312	0.0504215	1	1.04351	0.997537	1.04719	0.810654	0.535562	0.253264	0.0546294	15.3032	-0.167335	0	0.991086	14.8082	-0.127753	0	0.984758	15.4465	-0.152729	0	0.99149	15.026	-0.128471
O94864	SUPT7L	1	2	1	1.07031	0.99156	0.839717	0.618645	0.635435	0.840894	0.504372	1	0.967776	0.91311	0.854517	0.500335	0.309464	0.420254	0.310754	1	0.908711	0.978345	0.920346	0.661182	0.491292	0.564741	0.407884	1	1.04062	1.11362	0.870453	0.658769	0.351056	0.375264	0.320267		-0.998846	0.649837	0.786504	11.8078	-0.148214	0.329111	0.970662	16.2319	-0.0937801	0.441917	0.948992	13.4066	-0.107762
O94868	FCHSD2	3	1	1	0.989973	1.04928	1.07102	0.887221	0.534068	0.183458	0.0869066	1	0.934879	0.905859	0.890398	0.698546	0.53324	0.248389	0.0500452	1	0.992354	1.01221	1.02509	0.83533	0.58817	0.158776	0.0652989	1	0.86438	0.919083	0.863406	0.709743	0.421536	0.160676	0.0241084	15.1354	-0.151577	0	0.992188	14.3036	-0.106649	0	0.954971	15.2081	-0.152486	0	0.988606	13.6956	-0.127146
O94874	UFL1	31	38	1	0.972584	0.965453	0.857872	0.462659	0.109119	0.0320322	0.0222867	1	0.996539	0.976431	0.856189	0.459809	0.105666	0.0300149	0.0213469	1	0.990813	0.984313	0.86903	0.424427	0.1182	0.038816	0.0225164	1	0.999609	0.996619	0.887599	0.459456	0.122836	0.0382686	0.0236922	11.5352	-0.1803	0	0.995119	11.5134	-0.181316	0	0.996004	11.4063	-0.181956	0	0.998869	11.6366	-0.184421
O94876	TMCC1	3	5	1	1.00158	0.99851	0.912943	0.569373	0.352406	0.172869	0.179978	1	1.00392	1.00929	1.06815	0.663056	0.284056	0.198736	0.106225	1	0.989072	1.01809	1.05639	0.901598	0.268505	0.198266	0.117787	1	1.08531	1.10338	1.06019	0.623791	0.28419	0.19735	0.116871	12.7461	-0.121149	0.0880732	0.997196	13.0247	-0.179455	0.123609	0.99199	13.7207	-0.270542	0.148836	0.994917	12.8201	-0.181404
O94885	SASH1	3	6	1	0.972492	0.994275	0.923076	0.67274	0.517219	0.273528	0.102228	1	0.994865	0.965278	1.04468	0.762161	0.405	0.195869	0.0990518	1	1.01614	1.26553	1.04616	1.76344	0.489591	0.212759	0.143314	1	0.998705	1.13249	1.06174	0.747512	0.379796	0.208249	0.105458	14.2619	-0.0985605	0	0.983921	14.1215	-0.135302	0.0259753	0.99497	14.9852	-0.752641	0.177998	0.690812	13.9218	-0.141868
O94886	TMEM63A		1									1	1.00802	0.705706	0.745844	0.519232	0.340846	0.230604	0.144832									1	1.03661	0.976291	0.904466	0.736472	0.353354	0.22328	0.121262					11.0285	-0.0884386	0	0.92159					13.7845	-0.116078
O94887	FARP2	8	6	1	1.0279	0.987346	0.926002	0.477895	0.224548	0.142038	0.200989	1	0.906663	0.908164	0.82989	0.53437	0.296906	0.313926	0.289454	1	0.959738	0.965645	0.859702	0.470008	0.165218	0.0951425	0.0857835	1	1.00383	1.03331	0.964209	0.622183	0.285234	0.285123	0.249816	11.8104	-0.185485	0.153974	0.996649	12.0877	-0.120367	0.23776	0.969	11.6228	-0.155138	0.0216936	0.996301	12.6151	-0.218166
O94888	UBXN7	16	17	1	0.998102	0.981326	1.04364	0.836346	0.814643	0.735489	0.372956	1	1.00466	1.03873	1.03859	0.748164	0.568765	0.545363	0.341357	1	1.00887	1.03489	1.0935	0.897807	0.701376	0.615823	0.408409	1	1.01345	0.988066	1.01012	0.810457	0.541755	0.472202	0.325092	20.0495	-0.0678803	0	0.899597	16.8164	-0.0749331	0.289291	0.96259	19.2979	-0.0623793	0.0903018	0.958162	16.0958	-0.0882719
O94889	KLHL18	3	2	1	1.09329	1.15724	1.06166	0.739541	0.460767	0.086116	0.00602916	1	1.09135	0.93227	0.956921	0.69555	0.387588	0.130884	0.0112227	1	0.979599	0.933308	0.989429	0.608681	0.422629	0.110192	0.0162994	1	0.951321	0.966061	1.02264	0.764604	0.375915	0.152547	0.0129495	14.0739	-0.154283	0	0.962412	13.5774	-0.142178	0	0.983411	13.2756	-0.134133	0	0.977867	13.9172	-0.153495
O94898	LRIG2	3	3	1	1.17789	1.19749	1.11399	0.679784	0.403856	0.25607	0.11181	1	0.921	0.959444	0.958987	0.595727	0.323768	0.199521	0.152393	1	1.01851	1.05064	1.00146	0.630735	0.414226	0.180777	0.105926	1	0.912658	0.983227	0.997376	0.638039	0.29958	0.199226	0.116777	13.8437	-0.129256	0.0822332	0.928795	12.8468	-0.137316	0.112626	0.991113	13.5611	-0.117781	0	0.990315	13.0051	-0.153902
O94901-9	SUN1	4	2	1	1.02495	0.980804	1.00077	0.852833	0.208117	0.110124	0.0567652	1	0.954271	0.881573	0.832599	0.469788	0.157871	0.0535747	0.0319017	1	1.03075	1.0201	0.992795	0.676751	0.278765	0.0591163	0.0373481	1	1.02181	1.17387	1.09258	0.498791	0.199937	0.0756472	0.0421578	13.4408	-0.270685	0.0714719	0.998687	11.5056	-0.157516	0	0.984205	13.1098	-0.17164	0	0.997717	12.0971	-0.240434
O94903	PROSC	18	20	1	0.942009	0.963979	0.985168	0.80363	0.615359	0.275712	0.0643593	1	1.03976	0.987811	1.07464	0.807176	0.548742	0.374113	0.0891071	1	0.987676	0.974691	1.02227	0.962612	0.609693	0.320607	0.0910139	1	1.0104	1.13006	1.05634	0.884055	0.557023	0.36117	0.114903	15.4597	-0.123263	0	0.977819	15.4735	-0.107817	0	0.974904	15.9905	-0.137201	0	0.994915	15.7468	-0.114147
O94905	ERLIN2	6	11	1	1.0101	1.03806	0.930399	0.529905	0.311501	0.230986	0.134183	1	1.00465	1.00889	0.878433	0.457432	0.141092	0.0921901	0.0836598	1	1.02764	0.992326	0.910001	0.488926	0.24242	0.183002	0.108975	1	1.00408	0.96277	0.824143	0.434002	0.14931	0.0963787	0.0871422	12.4283	-0.134915	0.119969	0.995761	11.5826	-0.172149	0.0372385	0.998386	11.963	-0.152444	0.0961507	0.998357	11.3047	-0.153506
O94906	PRPF6	24	36	1	1.01248	0.923893	0.715127	0.272566	0.0652937	0.0423776	0.0339325	1	0.998352	0.967538	0.749244	0.289327	0.0752779	0.0492143	0.0374388	1	0.963688	0.886019	0.672933	0.233474	0.0602191	0.0406297	0.0316795	1	0.99562	0.918198	0.734491	0.273451	0.0739059	0.0399396	0.0273622	10.1805	-0.185598	0	0.995681	10.393	-0.18513	0	0.998845	9.88095	-0.188681	0	0.990487	10.2706	-0.187741
O94910	LPHN1	2	2	1	0.815614	0.534473	0.648367	0.409224	0.276033	0.232381	0.144559	1	1.05464	1.05419	1.01011	0.684008	0.310993	0.226315	0.192456	1	0.755638	0.739011	0.672725	0.558145	0.263109	0.261414	0.147996	1	0.992978	1.02731	1.03117	0.524426	0.293836	0.160793	0.115911	7.33022	-0.122187	0	0.871709	13.1068	-0.179077	0.189765	0.993887	10.563	-0.090551	0	0.828474	12.3403	-0.180881
O94913	PCF11	22	14	1	0.980024	0.998189	0.944203	0.560822	0.229113	0.18594	0.128797	1	0.974642	0.975047	0.910763	0.515721	0.17433	0.117471	0.0884837	1	1.01812	1.01333	0.949514	0.59771	0.214152	0.150978	0.112537	1	1.028	0.947343	0.901256	0.535279	0.18317	0.113778	0.0867978	12.3463	-0.170146	0.119421	0.998678	11.9972	-0.170138	0.0528736	0.997843	12.5105	-0.183771	0.0981535	0.998786	12.0954	-0.160384
O94915-2	FRYL	1	1	1	1.0369	1.01177	0.880049	0.247372	0.0397617	0.0564189	0.0271028	1	1.1434	1.15004	1.05591	0.427196	0.075188	0.0764883	0.0356025	1	0.895477	1.02428	0.879631	0.383308	0.0709699	0	0	1	0.906348	0.83625	0.905191	0.392706	0.0576846	0.0246539	0.0183513	10.6823	-0.26021	0.0249451	0.998449	11.8407	-0.479519	0.0604069	0.974616	11.2466	-0.212569	0	0.990455	11.3656	-0.220372
O94915	FRYL	21	38	1	0.983906	0.968632	0.812638	0.35419	0.0847645	0.0523482	0.0383346	1	1.01747	1.00354	0.865924	0.414713	0.112445	0.0599393	0.0462027	1	1.00652	0.977926	0.834396	0.324583	0.0808063	0.050365	0.0356524	1	1.01728	0.995845	0.874024	0.39775	0.118224	0.0617951	0.0475662	10.8741	-0.181207	0	0.998052	11.346	-0.17808	0.00271382	0.998891	10.8364	-0.197439	0.00844159	0.999251	11.2968	-0.184184
O94916-4	NFAT5	7		1	0.973631	0.992253	0.931189	0.670524	0.259368	0.0670305	0.0337996									1	0.984468	1.00296	1.01728	0.639475	0.293312	0.113236	0.0204098									12.9936	-0.168508	0	0.997306					13.0523	-0.157057	0	0.996442
O94916-5	NFAT5		8									1	0.98351	1.00982	0.959333	0.658625	0.271094	0.098269	0.0453018									1	0.926359	0.965042	0.884804	0.60777	0.266316	0.087242	0.055647					13.0195	-0.158069	0	0.99954					12.6211	-0.143836
O94919	ENDOD1	14	18	1	0.984071	0.983306	0.963281	0.745635	0.551367	0.425467	0.24854	1	1.04823	1.05189	1.05095	0.765213	0.473077	0.381306	0.265353	1	1.01898	1.01316	1.00761	0.746132	0.527715	0.360398	0.244809	1	0.993987	1.05587	1.0216	0.78501	0.461189	0.316269	0.237139	15.793	-0.0753033	0	0.993636	14.6942	-0.11553	0.253986	0.984221	15.251	-0.0896522	0.0948628	0.994899	14.5673	-0.121904
O94923	GLCE	7	9	1	0.997009	0.980129	0.947339	0.644642	0.268483	0.0651971	0.0248257	1	0.988666	0.977208	0.988553	0.582633	0.250184	0.111369	0.0644041	1	0.993506	1.04859	1.07646	0.674073	0.270453	0.0820866	0.02987	1	1.0146	1.08426	0.972977	0.613688	0.260757	0.0998006	0.0587747	12.9047	-0.165499	0	0.998028	12.6061	-0.165137	0.0369704	0.998421	13.1348	-0.17561	0.00022931	0.991535	12.7907	-0.157322
O94925-3	GLS	33	4	1	1.03294	1.05779	1.02185	0.640958	0.233957	0.0951095	0.0551406	1	1.00769	0.980665	0.98288	0.564633	0.159855	0.0202999	0.0114578	1	0.976178	1.02106	0.994871	0.566455	0.226862	0.0883822	0.0556611	1	1.00713	0.936299	0.919763	0.563518	0.188507	0.0361192	0	12.8254	-0.186008	0.0381085	0.995479	12.3343	-0.210291	0	0.999206	12.4692	-0.177681	0.0339151	0.998021	12.307	-0.183063
O94925	GLS		23									1	1.01167	1.02312	0.957914	0.589267	0.206331	0.0692185	0.0429904									1	0.969492	0.981583	0.931498	0.55858	0.208371	0.0803947	0.046016					12.52	-0.17412	0.00286503	0.999425					12.3441	-0.1621
O94927	HAUS5	24	23	1	1.01288	0.998975	0.973136	0.641867	0.401247	0.336144	0.132932	1	1.01714	1.01163	0.915669	0.559102	0.264973	0.181237	0.121053	1	0.992246	0.991494	0.933625	0.591402	0.331381	0.236813	0.123919	1	1.04126	0.910225	0.914707	0.569792	0.248616	0.143965	0.105666	13.8751	-0.0989096	0.0241817	0.987359	12.4306	-0.139685	0.0768668	0.99929	12.9539	-0.118804	0.0598213	0.997877	12.4454	-0.142553
O94941	UBOX5	5	2	1	0.989893	1.02175	1.02221	0.818976	0.574755	0.360899	0.115375	1	0.986471	0.937748	0.921305	0.745147	0.573611	0.427249	0.262451	1	1.03458	1.00913	1.14817	0.961802	0.53787	0.372449	0.195592	1	0.981993	0.907794	0.866277	0.80177	0.511798	0.402978	0.257218	15.623	-0.105815	0	0.988582	15.9199	-0.0710551	0	0.988011	15.5636	-0.143392	0.198412	0.965528	15.5906	-0.0744109
O94952	FBXO21	9	4	1	1.00993	0.981435	0.901961	0.488273	0.122745	0.0138586	0.0117403	1	0.850644	1.00509	0.887261	0.453002	0.185459	0.0660022	0.00968455	1	1.02006	1.00354	0.939255	0.508083	0.164813	0.0356195	0.0134327	1	1.08453	1.07198	0.977147	0.530973	0.18501	0.0630214	0.0226038	11.8325	-0.197546	0	0.997563	11.6809	-0.165394	0	0.98157	12.0391	-0.188686	0	0.999259	12.2315	-0.185098
O94953	KDM4B	5	8	1	1.04786	0.937201	0.912061	0.562013	0.203052	0.0876238	0.0349367	1	1.08419	1.01599	1.00202	0.634425	0.267521	0.0900882	0.0641229	1	1.02323	0.98258	0.970912	0.33189	0.225691	0.106813	0.0302934	1	1.03692	1.07804	0.991001	0.652391	0.28816	0.115018	0.0642898	12.3135	-0.160041	0	0.994508	12.9048	-0.16579	0.0207864	0.993436	11.2796	-0.239727	0.0939594	0.989297	13.0726	-0.15438
O94955	RHOBTB3	3	11	1	1.01778	1.05497	0.844628	0.515018	0.174028	0.0913871	0.0417885	1	0.998715	1.02272	0.937546	0.514544	0.150644	0.0755657	0.0498002	1	0.977184	1.00516	0.837337	0.561676	0.149158	0.0835241	0.0345642	1	1.01055	1.01752	0.907592	0.449112	0.162531	0.065853	0.0318832	11.8294	-0.150547	0	0.994383	12.0383	-0.190527	0.025031	0.999318	12.0123	-0.157133	0	0.990521	11.6917	-0.172738
O94964-2	SOGA1	15	9	1	1.04748	0.973153	0.894242	0.498877	0.162462	0.0721977	0.0428806	1	1.01788	0.968599	0.898767	0.466578	0.139356	0.061389	0.0514167	1	1.04417	1.02077	0.89489	0.885425	0.155111	0.0779943	0.0424979	1	1.01361	0.990069	0.869719	0.472624	0.139465	0.0702033	0.0509649	11.8856	-0.165649	0	0.997193	11.7099	-0.176456	0.0064136	0.998414	13.3672	-0.331777	0.0550656	0.990599	11.6516	-0.165234
O94966-5	USP19	42	37	1	0.963376	1.01164	0.999451	0.720636	0.355658	0.126196	0.0441828	1	0.990339	1.05793	1.02958	0.705462	0.37397	0.187061	0.0700759	1	1.00395	1.02158	1.04619	0.740054	0.371372	0.142427	0.0625687	1	0.995624	0.992138	0.968033	0.714183	0.355062	0.163312	0.0748336	13.6247	-0.149052	0	0.997376	13.7595	-0.132584	0	0.993152	13.8244	-0.146552	0	0.995779	13.6375	-0.135089
O94967-4	WDR47		8									1	1.02077	1.0798	1.02224	0.748	0.506646	0.2584	0.0465774									1	1.06769	1.06658	1.11074	0.851057	0.520623	0.241741	0.0466085					14.6222	-0.119812	0	0.981426					15.073	-0.139914
O94967	WDR47	13		1	1.01145	1.03378	1.0556	0.863413	0.611332	0.185139	0.0136869									1	1.03181	1.02758	1.02681	0.877282	0.589986	0.214329	0.0257414									15.4651	-0.171604	0	0.986934					15.4229	-0.158489	0	0.991979
O94972	TRIM37	2	1	1	0.971446	1.04937	0.915594	0.620425	0.338857	0.246769	0.225545	1	1.03955	0.974332	0.798114	0.462709	0.124624	0.0205671	0.00663947	1	0.901207	0.989491	0.945975	0.827504	0.280398	0.213709	0.146463	1	0.838824	0.908276	0.974619	0.529869	0.1323	0.0380268	0.0253997	12.9819	-0.125656	0.169743	0.995452	11.2924	-0.165637	0	0.990632	13.5103	-0.228715	0.165915	0.985817	12.1438	-0.218394
O94973-2	AP2A2	19		1	1.03082	1.07661	1.07617	0.81113	0.490582	0.169117	0.0688446									1	1.01331	1.05128	1.05852	0.750522	0.465074	0.158967	0.0713103									14.6586	-0.142512	0	0.985856					14.2839	-0.134992	0	0.988298
O94973	AP2A2		29									1	0.986007	1.02237	0.983778	0.743372	0.441359	0.162925	0.0370082									1	1.02584	1.06087	1.06388	0.778216	0.434127	0.17279	0.0431674					14.0915	-0.136454	0	0.994128					14.2723	-0.143181
O94979-8	SEC31A		52									1	0.994927	1.02179	1.00178	0.73469	0.354946	0.124363	0.0402646									1	0.998256	1.01775	0.997725	0.731048	0.331587	0.115872	0.045395					13.68	-0.152303	0	0.998392					13.5727	-0.156278
O94979	SEC31A	44		1	1.03396	1.02555	1.02988	0.745662	0.334369	0.125953	0.0630349									1	0.993397	0.983297	1.01133	0.77104	0.358422	0.130741	0.0627391									13.6598	-0.158314	0.0121349	0.996947					13.8662	-0.153845	0	0.999154
O94985-2	CLSTN1	8	11	1	1.01147	1.00652	1.0139	0.712549	0.442155	0.206162	0.0587758	1	0.972927	0.987484	1.07793	0.735854	0.421318	0.24217	0.12374	1	0.98696	1.01468	1.0469	0.776815	0.415011	0.176866	0.0775692	1	0.999445	1.15934	1.18006	0.812056	0.409939	0.231875	0.155816	14.0713	-0.124631	0	0.993291	14.1642	-0.126719	0.0606789	0.987722	14.2107	-0.13843	0	0.995973	14.2277	-0.157207
O94992	HEXIM1	13	16	1	0.96955	0.956817	0.952078	0.847045	0.844547	0.898481	0.711058	1	1.00979	1.05577	1.06973	0.811707	0.593104	0.621212	0.657266	1	0.999626	1.08107	1.05061	0.976775	0.723718	0.684688	0.675003	1	0.948693	0.995091	1.00012	0.820147	0.564932	0.54797	0.55695		-0.0170096	0.118684	0.74074		-0.898664	0.623861	0.965704		-0.114553	0.678022	0.956238		-0.180039
O95049-2	TJP3	5	4	1	0.966145	0.980841	0.966319	0.7019	0.385768	0.200289	0.123242	1	1.014	0.997028	0.98558	0.601924	0.267714	0.0734162	0.0261225	1	1.07204	1.02453	1.06853	0.758136	0.381922	0.188234	0.105819	1	0.970288	0.902237	0.923422	0.577058	0.235781	0.0693444	0.0286728	13.769	-0.120032	0.0147997	0.998384	12.7475	-0.163155	0	0.997985	13.9436	-0.146373	0.060472	0.989076	12.4665	-0.160237
O95057	DIRAS1	8	6	1	0.990439	1.02882	0.965832	0.604684	0.256523	0.136336	0.0691686	1	0.939516	0.918663	0.950004	0.546128	0.218944	0.093865	0.0474365	1	0.998985	1.00751	0.949651	0.631293	0.262518	0.11847	0.0470977	1	0.950266	0.991474	0.936087	0.559918	0.228307	0.110649	0.0586379	12.7279	-0.155154	0.0346736	0.998964	12.335	-0.161429	0.00815811	0.99141	12.8739	-0.151026	0	0.999788	12.4055	-0.153828
O95059	RPP14	4	2	1	0.988966	1.0152	0.984238	0.710617	0.531113	0.550061	0.285554	1	0.959708	0.895287	0.770317	0.530461	0.3666	0.260325	0.16016	1	1.03273	1.01748	1.02334	0.734339	0.511425	0.398431	0.222844	1	1.00462	0.872203	0.804993	0.64069	0.35321	0.285847	0.176809	16.4316	-0.0653095	0.0551469	0.956229	12.2191	-0.0901729	0	0.988167	15.2662	-0.0874376	0.0741102	0.986274	13.0406	-0.0878413
O95067	CCNB2	11	14	1	1.00806	0.983757	0.932873	0.468302	0.137136	0.0587471	0.0520139	1	0.957046	0.95391	0.872	0.428381	0.112294	0.0691541	0.0643977	1	1.00556	0.994268	0.893525	0.496702	0.140836	0.0631835	0.0426738	1	0.931075	0.88001	0.82947	0.417107	0.141097	0.0667941	0.0537169	11.7972	-0.196803	0.0244933	0.999578	11.4097	-0.179484	0.0176709	0.99534	11.8469	-0.173128	0	0.998638	11.2401	-0.159017
O95070	YIF1A	2	5	1	1.03432	1.05141	1.04066	0.611489	0.34606	0.189897	0.0761138	1	1.15215	1.19884	0.988116	0.674882	0.266451	0.160009	0.0940805	1	1.06572	1.09676	1.07892	0.672207	0.300245	0.124541	0.118342	1	0.952324	1.05318	1.00794	0.545981	0.267049	0.118786	0.0597296	13.1827	-0.136492	0.0407117	0.987505	13.046	-0.171895	0.0818588	0.95707	13.1135	-0.177675	0.0928307	0.982178	12.4887	-0.164155
O95071	UBR5	61	69	1	1.0012	1.01322	0.950571	0.53318	0.164582	0.0748913	0.0489047	1	1.02301	1.0318	0.9715	0.545523	0.166814	0.0588476	0.0357779	1	0.999463	0.995412	0.938221	0.512248	0.171842	0.0711074	0.043539	1	1.02787	1.02581	0.957884	0.540535	0.169392	0.0623582	0.0345984	12.1625	-0.190591	0.0259549	0.999796	12.2504	-0.197147	0.0161258	0.998904	12.0609	-0.178625	0.0122803	0.999965	12.2225	-0.188215
O95081	AGFG2	2	3	1	1.01258	1.12213	0.92082	0.839702	1.04749	0.90195	0.824919	1	1.07856	1.00199	1.08903	0.8328	0.675795	0.601126	0.719176	1	0.933197	1.03057	1.01521	0.782504	0.778374	0.761338	0.723803	1	1.00778	1.08384	1.05129	0.867283	0.586625	0.593909	0.56496		-0.245752	0.903515	0.39334		-0.174244	0.66449	0.918336		-0.181385	0.754454	0.938299		-0.197538
O95096	NKX2-2	2	1	1	1.1461	1.10366	1.1134	0.90426	1.22896	1.33748	1.27301	1	0.899305	1.0474	1.20508	0.913647	0.657901	0.891928	1.01153	1	1.00984	0.944162	1.14073	0.979601	0.861399	1.15308	1.07586	1	0.904821	1.21449	1.08608	0.993953	0.71574	0.829884	1.08467		0.685518	1.30525	0.603786		-0.327385	0.853785	0.31259		0.027137	1.11383	0.234069		-0.308875
O95104	SCAF4	9	13	1	1.00595	1.0413	1.06996	0.686412	0.384015	0.207301	0.0926559	1	1.06688	1.13367	0.963705	0.600391	0.330944	0.236281	0.144738	1	0.941675	0.974781	0.976179	0.499977	0.326306	0.146162	0.0691511	1	0.984247	0.858582	0.903343	0.595608	0.30886	0.180457	0.110405	13.7381	-0.131953	0.0364935	0.987879	12.9376	-0.133954	0.121655	0.978813	12.4435	-0.138145	0.0339555	0.986554	12.8061	-0.117275
O95136	S1PR2		1									1	1.10846	0.839883	1.08938	0.668091	0.23312	0.137604	0.0662458									1	0.8714	0.936417	0.851977	0.456663	0.26835	0.0923536	0.0506038					12.8961	-0.204888	0.0804499	0.963608					11.7369	-0.135979
O95139	NDUFB6	10	8	1	0.936781	1.03801	0.990518	0.720679	0.407118	0.142196	0.0384361	1	1.01179	1.01461	1.05319	0.70845	0.348351	0.147338	0.0339426	1	0.98545	0.948399	1.00494	0.835688	0.413689	0.142513	0.0413013	1	0.967517	1.07695	1.00634	0.701076	0.331486	0.154071	0.0450084	13.826	-0.14001	0	0.991206	13.6044	-0.149078	0	0.993887	14.333	-0.160597	0	0.997014	13.4996	-0.145282
O95140	MFN2	22	16	1	0.97491	1.00501	0.896998	0.488504	0.165667	0.0937538	0.0487094	1	0.993817	0.969373	0.860871	0.513831	0.157574	0.07893	0.0641367	1	0.988612	0.934534	0.881457	0.438856	0.155399	0.0728356	0.0479054	1	0.993914	1.07999	0.911124	0.484756	0.156081	0.0650909	0.051566	11.8486	-0.16318	0.00739252	0.998997	11.8425	-0.155315	0	0.996109	11.55	-0.166687	0.00428025	0.996624	11.8511	-0.175899
O95147	DUSP14	2	1	1	1.08857	1.24478	1.31337	0.969015	0.891513	0.780434	0.578334	1	1.01561	1.06699	1.3626	1.01327	0.475439	0.488735	0.501454	1	1.02262	1.18839	1.13097	0.398997	0.670176	0.563764	0.432896	1	0.908048	0.953905	1.12381	0.623792	0.391214	0.349014	0.250804		-0.0610954	0	0.583858	14.2843	-0.546889	0.48827	0.823927		-0.251819	0.529346	0.8452	12.7928	-0.209142
O95149	SNUPN	4	3	1	1.02962	0.968268	1.00593	0.736731	0.209024	0.00894089	0.00359224	1	0.933466	0.874266	0.996491	0.682223	0.347598	0.0729397	0.0102065	1	1.07073	1.05651	1.03173	0.852146	0.339023	0.0344384	0.00418115	1	1.17993	1.10895	1.20599	0.842384	0.407707	0.0883128	0.0165172	13.114	-0.224812	0	0.997631	13.3456	-0.159025	0	0.977001	13.9956	-0.211944	0	0.992286	14.2965	-0.184936
O95155-4	UBE4B	28	33	1	0.992262	1.01353	0.994237	0.616799	0.239164	0.0878405	0.0527069	1	0.971361	0.991818	0.969467	0.591321	0.207575	0.0582871	0.0276148	1	0.993124	1.0247	1.00717	0.645231	0.250137	0.0902239	0.0532599	1	0.969699	0.994241	0.979541	0.606514	0.218878	0.070534	0.032849	12.742	-0.17315	0.0206846	0.999207	12.5394	-0.179565	0	0.999158	12.9036	-0.174281	0.0215248	0.998613	12.6487	-0.175467
O95158	NXPH4		1									1	1.13503	1.11489	1.01302	0.68239	0.245928	0.0736568	0.0179743									1	0.824102	1.0467	1.01275	0.493065	0.252999	0.122895	0					13.0597	-0.182591	0	0.979604					12.266	-0.164106
O95159	ZFPL1	7	10	1	0.959021	0.947905	0.955032	0.720709	0.456391	0.232103	0.075036	1	1.01099	1.01174	1.05077	0.721993	0.432287	0.232852	0.0561985	1	0.978677	1.07397	1.0595	0.744195	0.467322	0.219352	0.0800563	1	1.01322	1.0883	1.02442	0.715791	0.409215	0.236538	0.0833958	14.1718	-0.115614	0	0.990098	14.1555	-0.124651	0	0.989496	14.3995	-0.123829	0	0.985364	14.0483	-0.120782
O95163	IKBKAP	42	55	1	1.00994	0.998523	0.956613	0.62724	0.329869	0.22085	0.196031	1	1.00032	0.988355	0.940941	0.59564	0.1992	0.0745565	0.0605019	1	0.991406	0.961757	0.959952	0.677184	0.270547	0.194537	0.162639	1	0.988725	0.969031	0.964076	0.61046	0.200226	0.0808834	0.0548539	12.9842	-0.142129	0.160896	0.999847	12.5067	-0.176212	0.017546	0.999219	12.973	-0.184103	0.152732	0.997627	12.5915	-0.18599
O95164	UBL3	2	2	1	1.23193	1.3146	1.30843	1.17353	1.19373	1.17765	0.743714	1	0.98801	0.998419	1.27673	0.786474	0.613596	0.51403	0.750979	1	1.08206	1.0933	1.16806	0.911418	0.883364	0.74914	0.511358	1	0.992779	1.02921	1.07294	0.902414	0.527597	0.398005	0.40991		0	2.54697e-05	-0.392245		-0.0353996	0.474437	0.545437		-0.0651847	0	0.844942	15.302	-0.152599
O95166	GABARAP	1		1	1.12845	1.00575	1.15802	0.837845	0.946319	0.811589	0.785016									1	1.13597	1.09636	1.36142	0.964314	0.850949	0.715971	0.838902										-0.0230187	0.706847	0.561069						-0.0604501	0.779568	0.419665
O95167	NDUFA3	2	3	1	1.20168	1.66674	1.42822	1.26924	0.838554	0.550804	0.475619	1	1.25166	1.21803	1.4105	1.03864	0.623387	0.521481	0.344872	1	1.10879	1.2886	1.51792	1.42537	0.588122	0.462666	0.345021	1	1.02033	1.14688	1.129	0.808559	0.43281	0.358126	0.253358	19.5261	-0.153087	0.486574	0.391548	16.4398	-0.156093	0.405682	0.715698	15.2689	-0.49355	0.403773	0.612632	14.3205	-0.149718
O95168	NDUFB4	9	8	1	0.940276	0.885904	0.775407	0.418147	0.102792	0.031506	0.0220143	1	1.01368	1.01447	1.00418	0.562754	0.187615	0.0978226	0.0735117	1	1.01168	0.96052	0.925092	0.527564	0.131774	0.0443396	0.0212054	1	0.98669	1.14928	0.938814	0.516144	0.164002	0.0859066	0.0629034	10.9492	-0.164554	0	0.981525	12.3347	-0.213184	0.0706223	0.999121	12.0748	-0.19599	0	0.997844	12.0564	-0.187968
O95169	NDUFB8	4	6	1	1.25444	1.38697	1.27348	1.17976	1.0434	0.932728	0.789625	1	1.17569	1.36929	1.31297	0.960944	0.637669	0.558681	0.536877	1	1.16483	1.21631	1.25812	1.17023	0.803357	0.679313	0.624565	1	1.16277	1.36269	1.20594	1.04073	0.620406	0.468886	0.450848		-0.339623	0.789625	-0.156413		-0.136845	0.541568	0.660769		-0.197884	0.651252	0.620881	15.5918	-0.410312
O95182	NDUFA7	9	5	1	0.973987	0.93971	0.953403	0.673915	0.415209	0.352776	0.319755	1	1.01869	0.973494	0.909542	0.650327	0.322063	0.262801	0.226085	1	0.978819	0.978886	0.970825	0.70098	0.403352	0.275199	0.272267	1	0.900532	1.02755	0.94972	0.623227	0.304311	0.193848	0.174222	13.7172	-0.122577	0.297075	0.992903	13.0961	-0.12745	0.174481	0.995269	13.6843	-0.132943	0.232799	0.99818	12.8718	-0.147991
O95196-2	CSPG5	1		1	0.862337	0.931848	1.07569	0.603486	0.342819	0.371357	0.254011									1	0.897826	1.04862	1.01244	0.692957	0.347778	0.26927	0.248192									12.4464	-0.286669	0.318673	0.95127					13.2303	-0.174319	0.244695	0.984435
O95197-6	RTN3	2	2	1	0.849862	0.9969	0.903965	0.695665	0.499038	0.296655	0.169042	1	1.01471	1.08146	0.970739	0.754027	0.390863	0.277551	0.199267	1	1.04768	1.22139	1.11294	0.741551	0.541507	0.302409	0.191924	1	0.953595	0.965668	0.98076	0.580118	0.386043	0.27761	0.21552	14.4284	-0.0900991	0	0.963574	13.9609	-0.133696	0.169762	0.991824	15.0969	-0.102519	0.0519575	0.929235	12.9493	-0.133973
O95197	RTN3	8	17	1	1.03497	1.07291	1.08932	0.886467	0.715357	0.543394	0.216049	1	1.04039	1.01587	1.11175	0.772259	0.493919	0.390291	0.225969	1	1.01203	1.10118	1.08818	0.942172	0.636215	0.445725	0.21276	1	1.0454	1.14035	1.13192	0.704252	0.475934	0.3643	0.224397	17.5962	-0.0922836	0	0.958249	15.0198	-0.108147	0.194433	0.970309	16.8367	-0.0993204	0	0.969825	14.402	-0.116926
O95198-2	KLHL2	1	1	1	0.727447	0.901176	1.11313	0.546971	0.501517	0.259003	0.0989155	1	0.934447	0.964302	0.86019	0.57357	0.287487	0.153947	0.0577381	1	1.41661	1.16733	1.00321	0.734945	0.182247	0.201956	0	1	0.995023	1.18713	0.929501	0.65254	0.233136	0.187926	0.10697	13.8648	-0.105301	0	0.836659	12.4566	-0.124996	0	0.992117	13.0293	-0.228347	0.072141	0.885731	12.8266	-0.170035
O95201	ZNF205		1									1	0.843708	1.07908	0.968635	0.38918	0.158519	0.125104	0.0858884									1	0.977287	0.849505	0.755338	0.364875	0.170569	0.0662378	0.062625					11.4912	-0.248055	0.103989	0.97595					10.7199	-0.145226
O95202	LETM1	46	51	1	0.968317	1.03918	1.03215	0.793129	0.486675	0.203911	0.0419527	1	1.00696	1.02085	0.972102	0.722197	0.459667	0.243928	0.0506102	1	0.975899	1.01246	0.976062	0.741852	0.498625	0.219507	0.0525639	1	0.991571	0.963852	0.970495	0.757484	0.439091	0.227453	0.0567829	14.6051	-0.136012	0	0.991094	14.2174	-0.118167	0	0.991465	14.4393	-0.121789	0	0.989784	14.2632	-0.124964
O95208	EPN2	7	8	1	1.07643	1.16627	1.1853	0.970394	0.887293	1.17728	0.902392	1	0.96022	0.939775	0.954265	0.730595	0.585266	0.655914	0.585496	1	1.04963	1.1301	1.01838	0.911537	0.741333	0.708249	0.658026	1	1.02505	0.971635	0.998636	0.81388	0.574516	0.556896	0.479985		0	0	-0.0677469		-0.095457	0.599565	0.957656		-0.063996	0.663579	0.90672		-0.101407
O95210	STBD1	12	11	1	0.960915	0.965709	0.958026	0.677002	0.296815	0.087806	0.0422356	1	0.999391	1.05821	0.971716	0.682587	0.357205	0.168079	0.0816469	1	1.00589	0.99056	0.972784	0.770617	0.360422	0.122504	0.0435408	1	0.951269	0.980727	0.961602	0.660715	0.346254	0.148159	0.0656111	13.1648	-0.157763	0	0.996825	13.5146	-0.130019	0	0.996666	13.8355	-0.156172	0	0.999284	13.3196	-0.133717
O95214-2	LEPROTL1	1	1	1	1.22746	1.28232	1.23576	1.09715	0.966214	0.693599	0.304323	1	0.799637	0.953263	1.05177	0.817076	0.634536	0.474761	0.28225	1	1.07019	1.18036	1.19042	1.00509	0.829351	0.571457	0.227945	1	0.990223	1.15577	1.1348	0.930245	0.687763	0.44443	0.196948	19.2643	-0.156143	0.122771	0.74496	16.9756	-0.0756218	0	0.899975	18.3087	-0.121284	0	0.900398	17.0018	-0.105366
O95218	ZRANB2	12	16	1	1.06813	1.03256	0.987626	0.510951	0.205677	0.0855412	0.0439238	1	1.00146	0.989968	0.83067	0.444339	0.154414	0.0518526	0.0268163	1	0.918723	0.94992	0.812454	0.450841	0.174628	0.062636	0.0445115	1	0.970119	0.867633	0.807631	0.455251	0.162063	0.0544587	0.0293922	12.1605	-0.18588	0.0367718	0.994537	11.3923	-0.161296	0	0.998056	11.3709	-0.150175	0	0.990607	11.3298	-0.152713
O95219	SNX4	12	17	1	1.01371	1.02663	0.982103	0.629471	0.268593	0.103933	0.0805872	1	0.989585	0.96551	1.00488	0.632111	0.309819	0.147227	0.0347083	1	1.08217	1.06451	1.05196	0.694146	0.260527	0.104488	0.0638268	1	1.00781	1.05524	1.04295	0.711808	0.297597	0.148326	0.0517491	12.865	-0.162204	0.0355382	0.998767	13.104	-0.144336	0	0.995475	13.125	-0.185883	0.0454919	0.989317	13.3929	-0.163187
O95229	ZWINT	11	9	1	1.07506	1.0823	1.06578	0.850835	0.641377	0.506349	0.295202	1	0.969748	0.980512	1.00268	0.701853	0.460388	0.337127	0.213273	1	1.01786	1.05234	1.04295	0.871511	0.569204	0.393045	0.253996	1	1.03379	1.04394	1.01822	0.818708	0.472046	0.336546	0.230066	17.3469	-0.0750644	0	0.963525	14.4164	-0.101496	0.134344	0.992735	15.9427	-0.1029	0.163362	0.990686	14.8168	-0.121397
O95232	LUC7L3	20	18	1	0.978855	0.945896	0.792249	0.415242	0.1652	0.0822729	0.0187901	1	0.989862	0.877717	0.748287	0.390418	0.118941	0.0450681	0.0366732	1	0.954203	0.902511	0.774613	0.414066	0.160579	0.0693261	0.0300629	1	0.975979	0.891384	0.790473	0.378723	0.125634	0.0554516	0.134117	11.1238	-0.15141	0	0.996069	10.7281	-0.156859	0	0.986015	11.0132	-0.149432	0	0.989322	10.8519	-0.166018
O95235	KIF20A	8	5	1	0.917599	1.04188	0.967423	0.483974	0.164891	0.0830315	0.0613994	1	0.926998	0.92608	1.03992	0.609648	0.256698	0.136848	0.0811966	1	0.98272	0.960194	0.909596	0.87459	0.166806	0.0872467	0.0409509	1	0.986174	1.13827	1.04431	0.700101	0.238997	0.137527	0.0924057	11.94	-0.206186	0.0537234	0.993522	12.7259	-0.181188	0.0798304	0.986373	13.3748	-0.313392	0.0571344	0.992116	13.0105	-0.207171
O95239	KIF4A	44	45	1	1.01226	0.979578	0.913314	0.444421	0.108801	0.0605474	0.0409392	1	0.98979	0.992785	0.883874	0.40628	0.0746646	0.0361986	0.0234629	1	1.00109	0.969512	0.911294	0.416472	0.105935	0.0585687	0.0402333	1	0.997374	0.971097	0.895013	0.402661	0.0827633	0.0347379	0.0253804	11.6229	-0.19682	0.0137725	0.998964	11.3508	-0.201178	0	0.998488	11.4873	-0.201096	0.0172283	0.999016	11.3765	-0.2031
O95248-4	SBF1	16	13	1	1.00323	1.04086	0.926274	0.479779	0.14473	0.0713962	0.0410037	1	0.988832	0.967102	0.855759	0.441264	0.118752	0.0491783	0.0457945	1	1.06555	1.05899	0.96624	0.449427	0.142242	0.0731124	0.045978	1	1.01666	0.963005	0.906572	0.435875	0.120587	0.0506045	0.0537145	11.8488	-0.186084	0.0157864	0.998654	11.4296	-0.17241	0	0.997317	11.7721	-0.218659	0.045384	0.994753	11.5684	-0.192062
O95249	GOSR1	5	8	1	1.0278	1.04434	1.00068	0.634519	0.311776	0.244941	0.143087	1	1.04757	0.983881	0.940783	0.584138	0.207284	0.0939466	0.0715756	1	1.0843	1.08715	1.00976	0.678952	0.300772	0.17664	0.142867	1	1.02838	0.995351	0.953445	0.577755	0.218151	0.086551	0.0654382	13.0063	-0.153561	0.150215	0.994135	12.4617	-0.171129	0.0314642	0.997683	13.1303	-0.169864	0.125827	0.987344	12.4717	-0.169374
O95251	KAT7	4	2	1	0.983422	0.947383	0.906459	0.483068	0.148992	0.0850055	0.0369898	1	1.12108	1.07461	1.07047	0.58679	0.281653	0.0966951	0.0899129	1	1.09224	1.14774	0.945326	0.559954	0.167132	0.0605659	0.00874783	1	1.00533	1.1229	1.01265	0.648292	0.203169	0.0990707	0.0513104	11.8256	-0.171408	0.00368203	0.997153	12.6898	-0.17921	0.0713664	0.977005	12.3009	-0.188436	0	0.981204	12.7566	-0.204195
O95260-2	ATE1	12	13	1	0.948841	0.982632	1.08491	0.842657	0.887605	0.888447	0.548833	1	1.009	1.05211	1.05529	0.865734	0.634284	0.679257	0.579501	1	1.02899	1.08022	1.10858	0.968392	0.79592	0.7371	0.597254	1	1.0478	1.07215	1.08743	0.831472	0.576133	0.598471	0.497976		-0.101782	0	0.753357		-0.158073	0.627787	0.961272		-0.0495813	0.504884	0.90184		-0.139125
O95260	ATE1	2	2	1	0.952088	0.989999	1.02424	0.896171	0.889914	0.848286	0.568287	1	1.0712	1.11811	1.11485	0.81465	0.604543	0.620465	0.55138	1	1.04948	1.01242	1.05215	1.05038	0.704315	0.666166	0.50033	1	1.05438	1.08736	1.11181	0.930794	0.612353	0.581099	0.478071		-0.0631714	0	0.880396		-0.167157	0.588428	0.916468		-0.15193	0.575699	0.937387		-0.119679
O95263	PDE8B		1									1	1.17982	1.22582	1.20062	0.808626	0.286456	0.0761736	0.110243									1	1.12284	0.948177	1.07952	0.613338	0.282784	0.108339	0.0888652					13.5746	-0.217832	0.0746343	0.927778					12.823	-0.178556
O95271	TNKS	6	9	1	1.0464	1.0456	0.978335	0.663778	0.35027	0.202463	0.125881	1	0.957936	1.07581	1.05921	0.721871	0.39656	0.211905	0.147335	1	1.04031	1.11468	1.01302	0.814124	0.299562	0.165609	0.106046	1	0.945572	1.02526	0.984005	0.650043	0.372707	0.198699	0.125544	13.3864	-0.13061	0.066093	0.99556	13.8493	-0.137766	0.101597	0.986267	13.6573	-0.199583	0.105687	0.98796	13.4435	-0.123685
O95273	CCNDBP1	5	5	1	1.04455	1.05434	1.0944	0.821322	0.601742	0.21002	0.0345043	1	1.00818	1.00095	0.903579	0.685737	0.497703	0.255249	0.0118823	1	1.00164	1.04584	1.03599	0.744999	0.614532	0.255672	0.051234	1	0.922252	0.870429	0.849351	0.688889	0.446433	0.232512	0.0353358	15.331	-0.146245	0	0.975382	14.0818	-0.111545	0	0.972774	15.1657	-0.11894	0	0.968899	13.7175	-0.10959
O95278-3	EPM2A		1									1	0.868486	1.03629	0.997203	0.522928	0.342096	0.189235	0									1	1.29699	0.669664	1.33615	0.636035	0.647584	0.274385	0.213453					12.7205	-0.132744	0	0.965384					15.3708	-0.097598
O95292	VAPB	14	16	1	0.899887	0.960844	0.969329	0.844104	0.790127	0.456	0.205279	1	0.946317	0.979174	1.05055	0.797885	0.584118	0.478188	0.188791	1	1.01184	1.00365	1.0999	1.09852	0.684834	0.472674	0.236101	1	0.956233	1.12819	1.05595	0.880772	0.569828	0.452624	0.20313	17.4064	-0.105811	0	0.951313	16.2754	-0.084181	0	0.964705	17.1182	-0.121784	0.163018	0.953978	16.3817	-0.0914833
O95294-3	RASAL1	5	6	1	1.02834	1.03014	0.927181	0.556666	0.231264	0.120581	0.0726914	1	0.897608	0.98644	0.946015	0.480893	0.152219	0.0728443	0.0407896	1	0.913311	0.984737	0.929049	0.578115	0.185402	0.0922885	0.0492467	1	0.911674	0.939946	0.928431	0.513637	0.166531	0.0687325	0.0368808	12.373	-0.151621	0.0241226	0.99858	11.8966	-0.193519	0.0252224	0.991876	12.3912	-0.170688	0.011246	0.992845	12.048	-0.174285
O95295	SNAPIN	8	8	1	1.00886	1.04102	1.09752	0.914754	0.746918	0.6371	0.503744	1	0.973834	1.06897	1.08019	0.816701	0.547402	0.515087	0.382753	1	0.985011	1.01982	1.08389	0.963019	0.628455	0.508055	0.442912	1	1.04892	1.18519	1.19832	0.870271	0.547718	0.465048	0.365802		-0.0601671	0.384572	0.956777	16.2553	-0.105473	0.407202	0.964792	17.3072	-0.13066	0.453558	0.981432	15.8105	-0.12292
O95297	MPZL1	11	11	1	0.990984	1.0248	1.00893	0.870828	0.829562	0.940478	0.750412	1	0.999225	0.980398	0.986481	0.738057	0.562732	0.598501	0.608197	1	1.02236	1.01107	1.04528	0.905108	0.721826	0.715062	0.668924	1	0.989915	1.02646	1.02108	0.742714	0.56961	0.540285	0.526046		-0.304762	0.840151	0.727363		-1.06702	0.58981	0.99396		-0.084486	0.687013	0.979282		-0.14133
O95298	NDUFC2	4	9	1	1.09384	1.09314	0.975246	0.656493	0.230994	0.0321285	0.00294721	1	1.05898	1.03175	1.12609	0.715631	0.244559	0.090209	0.051035	1	1.09514	1.06616	1.08725	0.774568	0.254256	0.0791125	0.0173313	1	0.986888	1.21419	1.05689	0.691169	0.273443	0.103981	0.0517796	12.8614	-0.19169	0	0.98769	13.1542	-0.203807	0.0424538	0.98482	13.4484	-0.20295	0.00566725	0.985915	13.1858	-0.176863
O95299	NDUFA10	18	23	1	0.95944	0.945804	0.838718	0.461666	0.140252	0.063892	0.0428592	1	0.947684	0.989218	0.895125	0.488826	0.132097	0.0501117	0.03205	1	0.987368	0.959418	0.830869	0.524111	0.150095	0.0646817	0.0429786	1	0.975504	0.982782	0.876512	0.45165	0.141782	0.055032	0.0311538	11.4805	-0.160389	0	0.994222	11.8071	-0.180325	0	0.996568	11.7706	-0.155575	0	0.99198	11.5794	-0.172326
O95302	FKBP9	18	24	1	0.965669	0.988506	1.01457	0.885709	0.927036	1.08876	0.892973	1	1.00316	1.01861	1.03784	0.805509	0.600186	0.676264	0.665279	1	0.999745	1.02966	1.06732	0.953556	0.786523	0.837585	0.802269	1	0.998518	1.1058	1.08111	0.824081	0.578305	0.606101	0.608314		-0.024854	0.949378	0.0964561		-0.912891	0.647243	0.978311		-0.534166	0.808792	0.919668		-1.03479
O95336	PGLS	17	20	1	1.36671	1.76534	1.54045	1.49384	1.54574	0.757608	0.0599658	1	1.23873	1.35009	1.4574	1.07913	0.863154	0.696029	0.157829	1	1.41736	1.46805	1.6332	1.30735	1.22123	0.732409	0.0943429	1	1.10724	1.23421	1.26328	0.987496	0.679231	0.556284	0.157982	18.2144	-1.28722	0.0599646	0.294896	18.8589	-0.20036	0	0.662163	18.1296	0	0.0943459	0.459268	17.4548	-0.108006
O95340-2	PAPSS2	13	16	1	1.03225	1.1115	1.08718	0.843752	0.539135	0.192018	0.0670434	1	0.966726	1.01428	0.971432	0.719212	0.492046	0.280867	0.0383817	1	1.01193	1.06965	1.00601	0.880367	0.548054	0.218773	0.0604318	1	1.0121	0.977202	0.987036	0.762509	0.505085	0.268353	0.0543851	15.0464	-0.144491	0	0.978919	14.4152	-0.113039	0	0.982325	15.2328	-0.146375	0	0.993804	14.6819	-0.117814
O95342	ABCB11	1		1	0.885106	0.960685	0.852348	0.64786	0.465893	0.330694	0.144819									1	1.25501	1.10531	1.13999	0.561819	0.4122	0.315424	0.125626									13.8971	-0.0855507	0	0.967226					12.9619	-0.154164	0.212569	0.90077
O95347	SMC2	55	46	1	0.989894	0.962249	0.854524	0.43291	0.0818183	0.0256846	0.0157111	1	1.0024	0.985999	0.902134	0.47975	0.129796	0.058022	0.0300136	1	0.988172	0.976366	0.857568	0.425268	0.0987649	0.0312527	0.0194928	1	0.983979	0.98646	0.894216	0.481625	0.132379	0.0639614	0.0385151	11.3639	-0.189425	0	0.995347	11.7805	-0.181442	0	0.999041	11.3514	-0.185187	0	0.997398	11.767	-0.175931
O95352	ATG7	20	27	1	0.986029	1.03966	1.00389	0.652066	0.276762	0.111256	0.0501533	1	1.02695	1.04768	0.962697	0.670947	0.276009	0.0910168	0.0407095	1	0.99367	1.02134	1.01645	0.676169	0.290162	0.100923	0.0389386	1	0.9786	0.953376	0.948173	0.675629	0.264677	0.0998156	0.0441382	13.0456	-0.159473	0.00887934	0.997618	13.0853	-0.161346	0	0.997465	13.1969	-0.161646	0	0.998052	13.0718	-0.160654
O95359-3	TACC2	22	27	1	0.978205	0.997042	1.05483	0.896835	0.821129	0.762829	0.444683	1	1.01723	1.0392	1.0803	0.79286	0.577039	0.478243	0.347328	1	1.00154	1.06668	1.07379	0.986295	0.703393	0.561732	0.369014	1	0.976884	1.04	1.0045	0.822214	0.525142	0.402962	0.287791	20.9276	-0.0637913	0	0.926867	16.3645	-0.0882971	0.307679	0.974091	18.3157	-0.0849742	0.251136	0.967768	15.5253	-0.100506
O95361	TRIM16	12	12	1	1.00432	1.04378	1.10472	0.818019	0.534909	0.277665	0.146826	1	0.962663	0.991055	0.939688	0.678708	0.429901	0.259986	0.068244	1	0.96414	1.01485	1.00076	0.81295	0.504437	0.274172	0.117493	1	1.00646	1.01007	1.01408	0.74006	0.443806	0.241235	0.0842038	15.2365	-0.114586	0.00632686	0.983049	13.877	-0.109959	0	0.990656	14.9807	-0.115224	0	0.996935	14.2986	-0.119198
O95363	FARS2	10	8	1	0.963024	0.965829	0.918997	0.491569	0.147899	0.0587866	0.0417351	1	1.08068	1.04716	0.9821	0.627585	0.201828	0.104747	0.0842558	1	0.98352	1.02497	0.948332	0.547787	0.176978	0.0675177	0.0376645	1	0.99435	1.06346	0.998179	0.56419	0.233636	0.102938	0.0565353	11.8956	-0.179818	0.00271361	0.997776	12.6335	-0.20523	0.0714848	0.99373	12.2585	-0.180437	0.00594604	0.999304	12.4767	-0.175271
O95365	ZBTB7A	5		1	0.98315	0.975614	0.942615	0.667258	0.504074	0.37832	0.271944									1	0.926679	0.921866	0.883505	0.645184	0.387924	0.30601	0.204947									14.8331	-0.0797787	0.102974	0.995133					13.6735	-0.0874676	0	0.983341
O95372	LYPLA2	11	12	1	1.44517	1.90493	1.68576	1.58157	1.18198	0.697	0.360098	1	1.38111	1.39656	1.52512	1.06081	0.80619	0.558246	0.291033	1	1.30891	1.40692	1.51604	1.34651	0.954298	0.527743	0.269936	1	1.11827	1.2057	1.25359	0.958262	0.616859	0.416194	0.230544					18.3809	-0.108699	0.0674125	0.554723	18.1609	-0.193685	0.229359	0.53472	16.364	-0.118845
O95373	IPO7	50	52	1	1.03978	1.06386	1.0176	0.631542	0.225819	0.0758191	0.0307748	1	1.0065	0.995407	0.968541	0.622082	0.237821	0.0663214	0.0232786	1	0.998107	1.08236	0.981091	0.520228	0.238354	0.0807945	0.0341517	1	1.03712	1.02434	0.999621	0.625275	0.240946	0.0786279	0.02387	12.7911	-0.182979	0.00815349	0.994861	12.7469	-0.172776	0	0.999482	12.2972	-0.165298	0.00679447	0.992701	12.8029	-0.173005
O95376	ARIH2	12	13	1	1.06575	1.04659	1.06204	0.825534	0.590687	0.180003	0.112974	1	0.968797	1.0456	1.05654	0.830724	0.565929	0.169237	0.0116766	1	0.966447	1.05345	1.10999	0.925611	0.568417	0.187169	0.0979702	1	0.976651	1.04828	1.08448	0.848948	0.506216	0.171747	0.0284963	15.2403	-0.135797	0	0.980508	15.0931	-0.158395	0	0.983483	15.3571	-0.169154	0.035807	0.985084	14.852	-0.15657
O95379	TNFAIP8	2	2	1	1.04649	1.09304	1.30811	1.00371	0.976198	0.555104	0.108327	1	0.969685	0.971095	0.982105	0.719681	0.606793	0.455268	0.126077	1	1.01387	1.24033	1.32326	1.2142	0.901421	0.510626	0.143388	1	0.961077	0.906494	1.09889	0.94965	0.552247	0.350925	0.113046	18.2344	-0.236859	0.0212493	0.893819	15.7229	-0.0842213	0	0.951729	18.0224	-0.175575	0	0.81569	15.8393	-0.124264
O95382	MAP3K6	5	7	1	1.03109	1.16696	1.05986	0.565679	0.219834	0.0813467	0.068942	1	1.0068	1.03345	0.896924	0.525268	0.16815	0.0857442	0.0301356	1	0.993583	0.987299	0.97844	0.636472	0.173799	0.0854832	0.054572	1	0.996985	1.04664	0.944132	0.490909	0.197474	0.0636332	0.0375897	12.426	-0.207775	0.0656742	0.976092	12.0382	-0.164861	0	0.997922	12.6259	-0.218361	0.0477361	0.999729	12.0164	-0.171626
O95391	SLU7	3	2	1	0.888436	0.850627	0.719636	0.409895	0.197622	0.13593	0.130933	1	1.04922	1.03374	0.935861	0.404286	0.182989	0.127686	0.0533524	1	0.953973	0.963569	0.89604	0.638095	0.207697	0.133839	0.107134	1	1.02249	1.02534	0.813629	0.322067	0.157859	0.0891476	0.0785679	10.7004	-0.11776	0	0.969286	11.5149	-0.19763	0.0755387	0.995567	12.6682	-0.167817	0.0636768	0.990409	10.7625	-0.186124
O95394-4	PGM3	28	33	1	0.979248	0.986902	1.01144	0.835378	0.587142	0.186285	0.0335344	1	0.972932	1.00026	0.981683	0.789585	0.529315	0.308252	0.0459223	1	0.996212	0.982164	1.00459	0.936309	0.583241	0.265787	0.0478748	1	0.996093	1.02235	1.00412	0.828736	0.509063	0.305651	0.0657997	15.2422	-0.152334	0	0.988423	15.0039	-0.116653	0	0.984572	15.6228	-0.151291	0	0.996756	15.0837	-0.120437
O95396	MOCS3	10	13	1	1.0381	1.04011	0.941837	0.634063	0.356206	0.165358	0.104486	1	1.00318	0.97699	0.90095	0.536082	0.252039	0.118004	0.074698	1	0.978942	1.01775	0.999547	0.74339	0.310258	0.168868	0.101579	1	1.00886	1.00984	0.900328	0.607789	0.249243	0.12339	0.0760106	13.239	-0.121437	0	0.99662	12.2787	-0.137318	0	0.999545	13.4995	-0.167032	0.0815458	0.998972	12.6427	-0.139678
O95400	CD2BP2	13	11	1	0.96564	0.951404	0.940645	0.743739	0.695628	0.488269	0.16584	1	0.978084	0.981572	0.971789	0.672527	0.507149	0.434044	0.228627	1	1.00807	0.979338	0.964587	0.742724	0.597594	0.445086	0.186045	1	1.03901	1.02127	0.945578	0.673041	0.461039	0.428991	0.235551	16.5655	-0.0791177	0	0.93206	15.2006	-0.075321	0	0.980969	15.8932	-0.0795442	0	0.977237	14.7037	-0.0825961
O95402	MED26	1		1	1.01814	1.04221	0.903264	0.717043	0.442624	0.306092	0.166519									1	0.933098	0.865843	0.86018	0.675254	0.418249	0.252246	0.128136									14.3059	-0.0932739	0	0.994632					13.6336	-0.0976041	0	0.96523
O95405	ZFYVE9	9	9	1	0.895581	0.997317	0.98648	0.813649	0.595978	0.314421	0.153429	1	0.995561	1.10931	1.09039	0.715195	0.479867	0.318995	0.208011	1	0.949877	1.02789	1.05708	0.88595	0.573236	0.34027	0.1586	1	0.943678	1.01641	0.995183	0.74341	0.451628	0.280188	0.155686	15.6038	-0.104266	0	0.980889	14.4921	-0.11195	0.157627	0.968389	15.8397	-0.11071	0	0.989966	14.4821	-0.10655
O95407	TNFRSF6B	3	2	1	0.973653	1.02586	0.989278	0.585185	0.423697	0.290174	0.186774	1	0.968999	0.887882	1.07643	0.681243	0.356253	0.238813	0.269375	1	0.909571	1.05696	1.01311	0.811188	0.388991	0.266976	0.220995	1	1.05684	1.23267	1.07348	0.732102	0.369545	0.254969	0.194914	13.3438	-0.115024	0.159174	0.987632	13.107	-0.189603	0.2537	0.97371	14.0093	-0.165077	0.213651	0.986573	13.6312	-0.158688
O95425	SVIL	8	5	1	0.978195	1.03805	1.05899	0.614127	0.253804	0.135703	0.0518066	1	0.990014	1.04406	0.996931	0.518537	0.227011	0.133385	0.089744	1	1.09933	1.14522	1.07427	0.510172	0.266726	0.128131	0.0589314	1	1.05459	1.05776	0.944398	0.534197	0.203671	0.112112	0.0576528	12.7815	-0.179072	0.0571703	0.991823	12.1851	-0.193073	0.0965434	0.99662	12.2697	-0.1958	0.091954	0.967545	12.2224	-0.168479
O95429	BAG4	7	7	1	0.907458	0.965083	1.01457	0.795096	0.823917	0.877573	0.706706	1	1.07133	1.09257	1.11234	0.787199	0.579739	0.559006	0.62842	1	1.03355	1.13637	1.15398	0.932936	0.714335	0.744428	0.654565	1	1.05285	1.03605	1.07836	0.796649	0.548825	0.50723	0.494429		-0.204298	0.800679	0.685681		-0.912751	0.589055	0.92968		-0.107472	0.696679	0.820847		-0.146756
O95433	AHSA1	51	57	1	1.02058	1.01597	0.999735	0.665585	0.253733	0.0681904	0.030516	1	0.967855	0.980476	0.970056	0.669307	0.283756	0.0817802	0.033332	1	1.00702	1.0128	1.02029	0.682544	0.266826	0.0812996	0.0307755	1	0.980168	1.00939	1.01118	0.733093	0.287654	0.0933145	0.0357686	13.0033	-0.176105	0	0.998858	13.0944	-0.163048	0	0.998143	13.1336	-0.173715	0	0.998477	13.4134	-0.172874
O95453	PARN	29	30	1	0.972978	1.02126	1.0247	0.853958	0.71862	0.479422	0.0639599	1	0.997174	1.00431	1.05573	0.787551	0.523463	0.37458	0.0910607	1	0.986659	0.984071	1.01729	0.867459	0.624853	0.419746	0.0898725	1	0.981858	1.06638	1.05847	0.80147	0.481281	0.351051	0.103777	16.8984	-0.12302	0	0.956077	15.2697	-0.105104	0	0.97792	16.2021	-0.11151	0	0.978875	15.0661	-0.108514
O95456	PSMG1	21	23	1	0.963898	1.05603	1.04702	0.917817	0.912294	1.02883	0.75502	1	0.97127	1.02829	1.03423	0.875099	0.61825	0.647444	0.608634	1	0.950646	1.06217	1.04738	0.823626	0.772694	0.744375	0.650097	1	1.02595	1.08699	1.06486	0.845087	0.613133	0.583662	0.525653		0	0	0.68316		-1.00022	0.624776	0.985909		-0.0556772	0.687583	0.905841		-0.106766
O95470	SGPL1	20	28	1	1.0225	0.999528	0.899895	0.48338	0.168826	0.0762309	0.0398641	1	1.01285	0.989066	0.865906	0.462857	0.161152	0.0687618	0.0316871	1	0.973691	0.941848	0.82678	0.423403	0.166292	0.0774666	0.0442946	1	1.00537	0.924862	0.854134	0.457357	0.155974	0.0716611	0.0383372	11.8388	-0.165211	0	0.999479	11.6221	-0.162642	0	0.99911	11.3047	-0.153665	0	0.996724	11.5408	-0.15965
O95471	CLDN7	1	3	1	1.63849	1.66327	1.34595	1.14206	1.09042	1.142	0.858751	1	1.17385	1.19593	1.10213	0.738658	0.560917	0.468583	0.385231	1	1.34178	1.2996	1.49842	1.48561	1.0452	0.781147	0.410593	1	0.878976	0.850505	0.947277	0.701056	0.41486	0.375906	0.231829		0	0	-0.711518	15.6978	-0.106174	0.400991	0.886211	20.9052	-1.03876	0.146828	0.255671	14.2363	-0.09711
O95476	CTDNEP1		2									1	1.07113	1.06058	0.797898	0.382097	0.198742	0.123403	0.0469231									1	1.12615	0.766533	0.745533	0.414557	0.205992	0.0981066	0.0510237					11.1057	-0.147534	0.0157223	0.992152					10.7948	-0.12789
O95478	NSA2	4	5	1	0.96007	1.02283	0.873437	0.496799	0.224054	0.125933	0.0420187	1	0.999917	1.00937	0.857969	0.39917	0.132927	0.092223	0.0641053	1	0.964884	0.980889	0.838	0.395446	0.186477	0.0890429	0.0460516	1	1.04313	1.06962	0.897226	0.388478	0.152431	0.0737765	0.0584575	11.9465	-0.141313	0	0.997505	11.2465	-0.176325	0.0336448	0.999434	11.273	-0.153723	0.00280643	0.99855	11.34	-0.191169
O95479	H6PD	8	7	1	1.05997	1.04816	1.12562	0.836129	0.448974	0.218761	0.100694	1	0.944397	0.989597	0.979484	0.754169	0.504805	0.174135	0.0288799	1	1.07002	1.06484	1.05222	0.830387	0.48678	0.205805	0.113589	1	1.00703	1.12025	1.04986	0.861051	0.525403	0.179494	0.0466537	14.6193	-0.143633	0.0439621	0.979792	14.4301	-0.133477	0	0.984566	14.7938	-0.132898	0.0101441	0.98816	14.9952	-0.153886
O95486	SEC24A	17	22	1	0.969048	0.985102	1.00317	0.622983	0.22251	0.0778069	0.0354046	1	1.01615	1.04874	0.953774	0.637114	0.270854	0.0814913	0.0336711	1	1.00792	1.00073	0.966339	0.652949	0.257186	0.0835529	0.0340196	1	0.981077	0.927106	0.95317	0.633949	0.259169	0.0847615	0.0366394	12.7374	-0.181259	0.010658	0.998397	12.8954	-0.160003	0	0.997255	12.9478	-0.166142	0	0.999732	12.8527	-0.1609
O95487	SEC24B	25	26	1	0.98613	0.984185	0.940939	0.568307	0.179175	0.0523993	0.027746	1	1.02029	0.997906	0.973306	0.576534	0.181223	0.0309978	0.010202	1	1.02022	0.981166	0.968018	0.556464	0.190403	0.0601297	0.0287991	1	1.00873	1.00235	0.987342	0.564779	0.185094	0.0429263	0.0161061	12.349	-0.182954	0	0.999286	12.4153	-0.197582	0	0.999178	12.3483	-0.18097	0	0.999324	12.387	-0.193224
O95502	NPTXR	3	5	1	1.27189	1.28268	1.42096	0.93702	0.830788	0.979421	0.686427	1	1.01812	1.01615	0.949906	0.686004	0.495223	0.537993	0.47211	1	1.01251	1.14392	1.06815	0.792552	0.633791	0.568951	0.462125	1	0.982543	0.926742	0.962157	0.741326	0.456021	0.410728	0.35889			0	0.176635	17.3983	-0.113387	0.481722	0.991065	20.5811	-0.078496	0.461352	0.930296	14.4739	-0.120259
O95503	CBX6	3		1	1.034	0.97329	0.878722	0.459286	0.156062	0.0787989	0.056778									1	0.992189	1.01927	0.80318	0.3825	0.156399	0.0628859	0.0306569									11.6365	-0.163606	0.00649721	0.998186					11.0381	-0.160709	0	0.999163
O95544-2	NADK	6		1	0.999333	1.08863	1.09771	0.871984	0.815101	0.840495	0.497407									1	1.03218	1.10515	1.06487	1.14987	0.724161	0.625688	0.439794										-0.0522383	0	0.817729						-0.135745	0.506973	0.884446
O95544	NADK		4									1	1.04882	1.01652	0.932154	0.737716	0.567689	0.569924	0.397036									1	1.05485	1.05288	1.02628	0.833754	0.552049	0.503479	0.335161					17.9196	-0.0596261	0.254935	0.975121					16.4328	-0.0884049
O95551-2	TDP2	5	10	1	0.938134	1.19818	1.16713	0.949556	0.94958	0.973242	0.728642	1	1.02352	1.04176	1.11616	0.820733	0.580761	0.533021	0.504014	1	1.0082	1.07179	1.54813	1.02781	0.749844	0.72799	0.600129	1	1.00079	1.016	1.02699	0.816307	0.51645	0.454152	0.414127			0	0.490825		-0.127379	0.51649	0.962301		-0.130973	0.659804	0.47064	15.3556	-0.129817
O95562	SFT2D2	2	1	1	0.942903	1.01163	1.00176	0.850436	0.862168	0.936748	0.673772	1	1.04759	1.15775	1.17149	0.599689	0.41456	0.393572	0.279014	1	0.935488	1.03442	1.07742	0.973273	0.713572	0.708959	0.684796	1	1.10097	1.13867	1.23505	0.815427	0.2769	0.297155	0.228138		-0.0207628	0	0.632916	12.4823	-0.287327	0.35948	0.931585		-0.134179	0.69623	0.936535	12.9596	-0.351857
O95563	MPC2	5	6	1	0.972773	0.976373	0.930658	0.482908	0.153225	0.0556084	0.0305345	1	0.979836	1.0954	0.991055	0.626601	0.285863	0.135808	0.0442234	1	0.993291	1.01142	0.920081	0.434386	0.166586	0.0528577	0.0307036	1	0.964769	1.02957	0.979862	0.576836	0.228028	0.107083	0.0654337	11.8904	-0.182379	0	0.999051	12.9844	-0.147777	0	0.99128	11.6564	-0.179706	0.00424771	0.999476	12.5061	-0.17369
O95568	METTL18	6	6	1	1.02696	1.02627	1.04623	0.82191	0.522598	0.145119	0.0565037	1	1.06644	1.06805	1.08832	0.799189	0.495021	0.276977	0.0504446	1	1.01578	1.04723	1.06571	0.921956	0.506496	0.221178	0.0500213	1	0.981965	1.08763	1.05511	0.826813	0.438956	0.237545	0.0663543	14.797	-0.150234	0	0.990412	14.8577	-0.125706	0	0.976483	15.1383	-0.156187	0	0.99253	14.6099	-0.134996
O95571	ETHE1	21	15	1	0.976773	0.998762	0.994789	0.863608	0.876165	0.958592	0.743363	1	0.961627	0.978056	1.00537	0.811743	0.555103	0.621183	0.604197	1	0.954755	1.01495	1.02196	0.905677	0.74173	0.760511	0.690118	1	1.01706	1.03607	1.00616	0.787077	0.546224	0.545314	0.561291		-0.0144124	0	0.612189		-1.03231	0.593494	0.983818		-0.0780638	0.719703	0.960166		-1.08116
O95573	ACSL3	40	53	1	0.970231	0.98495	0.859822	0.470346	0.146773	0.0579223	0.0364793	1	0.94589	0.986855	0.914061	0.488047	0.154399	0.0632315	0.0444667	1	0.977033	0.974854	0.888047	0.424012	0.151637	0.059524	0.0383222	1	0.957139	0.966018	0.898949	0.501007	0.163188	0.0635892	0.0379105	11.6143	-0.165368	0	0.997545	11.8742	-0.175467	0.0033994	0.997379	11.5038	-0.17308	0.00109155	0.999151	11.9095	-0.168971
O95602	POLR1A	48	63	1	1.00902	1.0159	0.966992	0.519319	0.147058	0.0572676	0.0260123	1	1.02775	1.05469	1.00951	0.584956	0.205564	0.0962897	0.0817729	1	1.02389	1.04829	0.972322	0.72724	0.166695	0.0610528	0.0314678	1	1.02325	1.04711	0.981524	0.569823	0.206322	0.0993115	0.0811014	12.1059	-0.20329	0.0129227	0.999743	12.4645	-0.205225	0.0716399	0.996457	12.9501	-0.2428	0.0279138	0.997637	12.4002	-0.191967
O95613	PCNT	20	12	1	0.993901	1.0017	0.965762	0.791762	0.559642	0.331119	0.164854	1	0.939882	0.96877	1.19528	0.867634	0.462369	0.296256	0.156348	1	1.02669	1.05183	1.19137	1.00261	0.500885	0.33076	0.180331	1	0.991781	1.33387	1.22961	0.919743	0.467495	0.346259	0.167011	15.3936	-0.097063	0	0.996712	14.8137	-0.145208	0.144023	0.952747	15.1121	-0.201378	0.224581	0.953285	14.973	-0.155602
O95619	YEATS4	2	6	1	0.950991	1.0594	0.990861	0.738994	0.554333	0.482849	0.260234	1	0.959614	1.01733	0.965468	0.609636	0.383979	0.367318	0.286301	1	0.978701	1.05858	1.06998	0.753685	0.480799	0.424192	0.318228	1	1.00336	1.05826	0.979479	0.661766	0.375405	0.310863	0.272991	16.1806	-0.0711744	0	0.971616	13.0535	-0.141281	0.303798	0.994182	14.6326	-0.123637	0.338377	0.978891	13.2921	-0.146777
O95620	DUS4L	1	1	1	1.08081	1.09135	0.986159	0.77711	0.569091	0.632286	0.426575	1	0.814503	0.9203	0.959488	0.629559	0.447927	0.334346	0.271238	1	0.787963	0.975457	0.783597	0.623598	0.501986	0.288158	0.301116	1	0.853111	0.877443	0.926923	0.819563	0.410731	0.277438	0.179404	20.2078	-0.0735189	0.448279	0.928917	13.7712	-0.105396	0.227897	0.92868	13.9265	-0.0717468	0	0.902004	14.3441	-0.1352
O95625	ZBTB11	1	3	1	1.0111	0.979611	0.613583	0.430512	0.220002	0.103404	0.0637664	1	1.03322	1.04288	0.937698	0.418053	0.211597	0.163858	0.193004	1	1.0997	1.08046	0.893891	0.554592	0.142743	0.116123	0	1	1.05447	0.998543	0.866037	0.404414	0.233313	0.164361	0.113765	10.3955	-0.124422	0	0.990851	11.4977	-0.215291	0.170634	0.996971	12.1561	-0.171095	0	0.984123	11.3592	-0.163387
O95628-10	CNOT4	9	12	1	0.956488	1.00998	1.03802	0.807592	0.594596	0.552612	0.498475	1	1.02414	1.07333	1.11264	0.79436	0.472479	0.385191	0.395074	1	1.02979	1.06274	1.07967	0.891197	0.540321	0.399422	0.405937	1	0.995189	1.08332	1.05758	0.828576	0.463609	0.346181	0.304372		-0.103016	0.511191	0.985998	14.3173	-0.160991	0.386973	0.971866	15.4635	-0.140927	0.386174	0.98124	14.5664	-0.144588
O95630	STAMBP	14	21	1	0.958365	0.965891	0.959044	0.760067	0.749651	0.784566	0.595582	1	0.97973	0.93574	0.971754	0.717491	0.569271	0.582641	0.576442	1	0.949496	0.97776	0.969637	0.771358	0.628703	0.584727	0.554829	1	0.954946	0.982452	0.951762	0.794857	0.524694	0.505738	0.488565		-0.027846	0	0.866145		-0.119152	0.568487	0.981233		-0.0756729	0.542295	0.987909	17.2934	-0.137333
O95639	CPSF4	7	5	1	0.981911	0.986704	0.878865	0.534377	0.219949	0.125205	0.0654199	1	1.01517	1.05452	0.976773	0.57436	0.218186	0.0964133	0.0559375	1	0.901635	1.01766	0.906049	0.518368	0.190032	0.0997005	0.0636664	1	1.00962	0.977865	0.923324	0.530415	0.207569	0.0742555	0.0397317	12.1376	-0.139413	0	0.998892	12.4772	-0.175645	0.0325587	0.997408	12.0518	-0.15868	0.0153466	0.991465	12.1848	-0.161497
O95644	NFATC1	3	2	1	1.03748	1.18529	1.11548	0.757945	0.510673	0.281327	0.136502	1	1.2516	1.4661	1.5207	0.79309	0.387186	0.0878546	0.0809847	1	1.03049	1.09687	1.06765	0.710738	0.377758	0.216348	0.101859	1	0.78344	0.822514	0.781477	0.484607	0.197472	0.0978838	0.099288	14.9251	-0.109979	0	0.948708	14.0558	-0.181161	0.0317368	0.766058	13.79	-0.13647	0.0597214	0.982857	11.3687	-0.127249
O95671	ASMTL	21	16	1	1.09045	1.02832	1.03122	0.661748	0.286056	0.130033	0.047303	1	0.984116	0.965514	0.955556	0.562693	0.204962	0.0332577	0.0118217	1	1.03802	1.02514	1.01395	0.634307	0.255085	0.100918	0.0544596	1	1.02508	0.971728	0.979009	0.592328	0.219043	0.0493621	0.013697	13.1395	-0.159702	0.0174284	0.990522	12.3752	-0.183343	0	0.997676	12.8752	-0.171484	0.0267783	0.997032	12.5684	-0.181458
O95674	CDS2	5	5	1	0.939854	0.963909	0.879673	0.575413	0.304399	0.135643	0.126567	1	0.938371	0.913885	0.926533	0.669878	0.474693	0.401765	0.426112	1	0.970288	1.05668	1.00405	0.61176	0.325787	0.140374	0.0615647	1	0.939029	0.921462	1.00527	0.787943	0.461117	0.346831	0.30119	12.583	-0.119688	0	0.993566	14.5208	-0.103304	0.378488	0.972846	13.0673	-0.138328	0	0.992884	14.5054	-0.129278
O95684	FGFR1OP	5	5	1	0.94705	0.934954	0.956406	0.831481	0.651276	0.5467	0.276463	1	1.01111	0.981713	1.26592	0.991849	0.61111	0.411194	0.268757	1	0.960609	0.943076	0.946403	0.891075	0.569618	0.431998	0.237785	1	0.9736	1.33516	1.10958	0.818827	0.521849	0.351	0.240755	17.4649	-0.0693778	0	0.961002	16.106	-0.141645	0.270987	0.909464	16.3871	-0.0863646	0	0.981903	15.2299	-0.11367
O95685	PPP1R3D	1	4	1	1.0611	1.09861	0.994488	0.952001	0.761328	0.597438	0.392623	1	0.892008	0.968047	0.948356	0.720879	0.45717	0.44705	0.281353	1	0.756014	0.976087	1.01167	0.966385	0.64564	0.399061	0.295971	1	0.9598	1.15028	1.02665	0.771809	0.50172	0.410194	0.264619	19.1961	-0.0703766	0	0.966731	14.9288	-0.0874591	0.21902	0.963273	16.3697	-0.129315	0.26378	0.893295	15.2065	-0.0985258
O95707	POP4	8	7	1	1.08805	1.12372	1.13994	0.859252	0.782397	0.851667	0.426311	1	1.05378	1.10029	1.01187	0.70788	0.488367	0.418585	0.273724	1	0.94951	1.04409	1.05214	0.660633	0.628242	0.545576	0.305217	1	1.02574	1.093	1.04332	0.691474	0.416154	0.344971	0.225213		-0.0605928	0	0.758041	14.8054	-0.0977072	0.24635	0.972361	17.0772	-0.061566	0	0.918783	13.8309	-0.129667
[truncated: 8,665 more rows]
[truncated: 24 more columns]
