# Supplementary material for: Assessing target engagement using proteome-wide solvent shift assays
Source: eLife. 2021 Dec 8;10:e70784. doi: 10.7554/eLife.70784 (PMC8654358; doi:10.7554/eLife.70784)
Supplement: Figure 3—source data 1. [file elife-70784-fig3-data1.xlsx]

## Sheet: Legend - solvent-PISA
This table contains solvent-PISA data for DMSO- and SCIO-469-treated HCT116 lysates (N=4)
The eight samples contained within represent eight TMT channels from a TMTpro 16plex
Full dataset - solvent-PISA tab - Unfiltered protein abundance data - 8301 proteins
Uniprot Id
Gene Symbol
Description
Number of peptides	Number of quantified peptides
Veh_1 (126)	TMT SSN scaled to 100
Veh_2 (127N)	TMT SSN scaled to 100
Veh_3 (127C)	TMT SSN scaled to 100
Veh_4 (128N)	TMT SSN scaled to 100
SCIO469_1 (128C)	TMT SSN scaled to 100
SCIO469_2 (129N)	TMT SSN scaled to 100
SCIO469_3 (129C)	TMT SSN scaled to 100
SCIO469_4 (130N)	TMT SSN scaled to 100
Average (Veh)	Mean of Vehicle treated samples
Average (SCIO469)	Mean of SCIO-469-treated samples
fold change (SCIO469/Veh)	fold change of SCIO469-treated samples compared to vehicle treated control
log2 fold change (SCIO469/Veh)	log2 trasnfomation of fold change
CV (Veh)	%CV of vehicle-treated samples
CV (SCIO469)	%CV of SCIO-469-treated samples
Filtered dataset - solvent-PISA tab - Proteins quantified with at least two peptides, %CV < 15% - 7000 proteins
Uniprot Id
Gene Symbol
Description
Number of peptides	Number of quantified peptides
Veh_1 (126)	TMT SSN scaled to 100
Veh_2 (127N)	TMT SSN scaled to 100
Veh_3 (127C)	TMT SSN scaled to 100
Veh_4 (128N)	TMT SSN scaled to 100
SCIO469_1 (128C)	TMT SSN scaled to 100
SCIO469_2 (129N)	TMT SSN scaled to 100
SCIO469_3 (129C)	TMT SSN scaled to 100
SCIO469_4 (130N)	TMT SSN scaled to 100
Average (Veh)	Mean of Vehicle treated samples
Average (SCIO469)	Mean of SCIO-469-treated samples
fold change (SCIO469/Veh)	fold change of SCIO469-treated samples compared to vehicle treated control
log2 fold change (SCIO469/Veh)	log2 trasnfomation of fold change
CV (Veh)	%CV of vehicle-treated samples
CV (SCIO469)	%CV of SCIO-469-treated samples
pbFDR - Perseus - solvent-PISA tab - Proteins quantified with at least two peptides - 7213 proteins
Significant	+ indicates an FDR < 0.05
-Log10(P-value)	nominal p-value
log2 fold change	log2 transformation of fold change (SCIO-469/Vehicle)
Protein Id
Gene Symbol
Description
Number of peptides	Number of quantified peptides
Veh_1	TMT SSN scaled to 100 - log2 transformation
Veh_2	TMT SSN scaled to 100 - log2 transformation
Veh_3	TMT SSN scaled to 100 - log2 transformation
Veh_4	TMT SSN scaled to 100 - log2 transformation
SCIO469_1	TMT SSN scaled to 100 - log2 transformation
SCIO469_2	TMT SSN scaled to 100 - log2 transformation
SCIO469_3	TMT SSN scaled to 100 - log2 transformation
SCIO469_4	TMT SSN scaled to 100 - log2 transformation

## Sheet: Full dataset - solvent-PISA
Uniprot Id	Gene Symbol	Description	Number of peptides	Veh_1	Veh_2	Veh_3	Veh_4	SCIO469_1	SCIO469_2	SCIO469_3	SCIO469_4	Average (Veh)	Average (SCIO469)	fold change (SCIO469/Veh)	log2 fold change (SCIO469/Veh)	CV (Veh)	CV (SCIO469)
sp|Q8TAX7|MUC7_HUMAN	MUC7	MUC7_HUMAN Mucin-7	1	2.47485	2.70351	1.58493	1.93396	2.6171	2.89896	2.83681	54.1667	2.17431	15.6299	7.18843	2.84568	0.233836	1.64374
tr|Q9H552|Q9H552_HUMAN		Q9H552_HUMAN Uncharacterized protein	1	4.07474	3.42704	5.37842	1.40502	5.4605	25.4119	2.81724	5.06585	3.57131	9.68887	2.71298	1.43988	0.463857	1.08851
sp|Q16539|MK14_HUMAN	MAPK14	MK14_HUMAN Mitogen-activated protein kinase 14	16	4.42323	4.42388	4.84436	4.98782	11.2085	11.4202	10.3856	10.7238	4.66982	10.9345	2.34153	1.22745	0.0621724	0.042787
sp|P05090|APOD_HUMAN	APOD	APOD_HUMAN Apolipoprotein D	4	4.25002	3.87043	3.57969	6.8679	21.2788	13.2354	2.17051	4.50828	4.64201	10.2982	2.21849	1.14958	0.325095	0.847985
sp|Q9GZZ8|LACRT_HUMAN	LACRT	LACRT_HUMAN Extracellular glycoprotein lacritin	1	4.03195	5.68043	4.2388	1.95438	10.8703	11.5702	4.67522	2.89046	3.97639	7.50155	1.88652	0.915728	0.385907	0.581845
sp|P01876|IGHA1_HUMAN	IGHA1	IGHA1_HUMAN Ig alpha-1 chain C region	6	3.98579	6.9823	2.93866	6.10106	18.2927	9.93059	2.81096	6.39999	5.00195	9.35856	1.87098	0.903795	0.372585	0.708173
sp|P26651|TTP_HUMAN	ZFP36	TTP_HUMAN Tristetraprolin	1	4.08408	4.81335	4.847	5.77157	5.85919	10.9045	9.89125	9.56482	4.879	9.05494	1.8559	0.89212	0.1417	0.243572
sp|Q96C90|PP14B_HUMAN	PPP1R14B	PP14B_HUMAN Protein phosphatase 1 regulatory subunit 14B	4	4.44563	5.43162	5.02699	5.08645	6.59224	9.33511	7.8177	7.78081	4.99767	7.88146	1.57703	0.657207	0.0818348	0.142599
sp|P53778|MK12_HUMAN	MAPK12	MK12_HUMAN Mitogen-activated protein kinase 12	3	5.3002	4.92696	5.02165	6.09607	7.92697	8.07466	8.67703	8.69122	5.33622	8.34247	1.56337	0.644656	0.0994636	0.0478434
sp|Q99595|TI17A_HUMAN	TIMM17A	TI17A_HUMAN Mitochondrial import inner membrane translocase subunit Tim17-A	2	5.08288	4.53289	4.17368	5.97314	5.44327	8.69336	8.47297	8.12956	4.94065	7.68479	1.55542	0.637306	0.158546	0.196784
sp|P27348|1433T_HUMAN	YWHAQ	1433T_HUMAN 14-3-3 protein theta	32	5.18403	5.20997	4.82666	4.96874	5.28746	9.19698	9.10443	7.37202	5.04735	7.74022	1.53352	0.616849	0.0361741	0.237462
sp|P20929|NEBU_HUMAN	NEB	NEBU_HUMAN Nebulin	1	6.10343	6.43042	10.5453	4.28887	3.68431	3.54328	19.2616	14.7693	6.842	10.3146	1.50754	0.5922	0.386211	0.770948
sp|P45984|MK09_HUMAN	MAPK9	MK09_HUMAN Mitogen-activated protein kinase 9	4	5.32268	5.71	5.69969	5.96396	8.54684	8.45431	8.00303	8.54992	5.67408	8.38852	1.47839	0.56403	0.0465685	0.0310898
sp|P48380|RFX3_HUMAN	RFX3	RFX3_HUMAN Transcription factor RFX3	2	4.69942	5.40968	5.73864	5.44631	6.09814	8.43561	8.92262	7.40812	5.32351	7.71612	1.44944	0.535498	0.0829027	0.161973
sp|Q86T82|UBP37_HUMAN	USP37	UBP37_HUMAN Ubiquitin carboxyl-terminal hydrolase 37	2	4.78531	5.05398	6.51396	6.56871	6.90757	8.29879	8.32315	8.46027	5.73049	7.99745	1.3956	0.480881	0.16455	0.0912856
sp|Q6ZS86|GLPK5_HUMAN	GK5	GLPK5_HUMAN Putative glycerol kinase 5	1	6.63715	6.31767	4.99547	4.27852	5.27402	7.57343	8.85499	8.82612	5.5572	7.63214	1.37338	0.457729	0.19971	0.220355
sp|Q05932|FOLC_HUMAN	FPGS	FOLC_HUMAN Folylpolyglutamate synthase, mitochondrial	3	4.95144	5.61426	6.08925	6.11169	6.27765	7.4159	8.65696	8.53365	5.69166	7.72104	1.35655	0.439946	0.0956113	0.144083
sp|P63165|SUMO1_HUMAN	SUMO1	SUMO1_HUMAN Small ubiquitin-related modifier 1	11	5.56949	5.75519	5.79447	5.48771	6.35646	8.26461	8.26666	7.32092	5.65172	7.55216	1.33626	0.418201	0.0259933	0.120906
sp|P49336|CDK8_HUMAN	CDK8	CDK8_HUMAN Cyclin-dependent kinase 8	5	5.19056	5.05874	6.38981	6.28395	7.4446	7.48944	7.6384	8.04121	5.73076	7.65341	1.3355	0.417375	0.122719	0.0354716
sp|Q9P2G1|AKIB1_HUMAN	ANKIB1	AKIB1_HUMAN Ankyrin repeat and IBR domain-containing protein 1	1	5.36357	3.68469	6.76709	6.41124	7.42696	8.58587	7.24003	6.23112	5.55665	7.371	1.32652	0.407645	0.248868	0.130962
sp|Q9BWU1|CDK19_HUMAN	CDK19	CDK19_HUMAN Cyclin-dependent kinase 19	6	5.71592	5.81837	5.52603	6.15187	7.75102	7.6942	7.56527	7.68572	5.80305	7.67405	1.32242	0.403178	0.0451826	0.0101774
sp|Q7L1W4|LRC8D_HUMAN	LRRC8D	LRC8D_HUMAN Leucine-rich repeat-containing protein 8D	3	5.16258	5.78284	5.75474	5.80368	6.30695	7.98527	7.64014	7.64298	5.62596	7.39383	1.31424	0.394224	0.0550253	0.10042
sp|P45983|MK08_HUMAN	MAPK8	MK08_HUMAN Mitogen-activated protein kinase 8	5	5.91633	5.73176	5.81741	6.28517	7.56234	7.69769	8.01189	7.93339	5.93767	7.80133	1.31387	0.393823	0.041032	0.0266458
sp|Q6ZT07|TBCD9_HUMAN	TBC1D9	TBCD9_HUMAN TBC1 domain family member 9	3	5.11349	5.32781	5.62932	5.58686	6.15528	7.2067	8.44025	6.64715	5.41437	7.11235	1.31361	0.393532	0.0444773	0.138347
sp|O95503|CBX6_HUMAN	CBX6	CBX6_HUMAN Chromobox protein homolog 6	1	5.19197	5.87636	5.01502	5.33359	14.3504	4.45873	4.20353	4.84738	5.35424	6.96501	1.30084	0.379445	0.0694179	0.707925
sp|Q9UM00|TMCO1_HUMAN	TMCO1	TMCO1_HUMAN Transmembrane and coiled-coil domain-containing protein 1	1	4.54284	4.57657	6.05536	6.17583	5.47496	6.73851	7.57728	7.95794	5.33765	6.93717	1.29967	0.378143	0.168566	0.158549
sp|Q9HBU6|EKI1_HUMAN	ETNK1	EKI1_HUMAN Ethanolamine kinase 1	10	5.15644	5.62326	5.92588	5.91043	6.26449	7.19703	8.08753	7.8255	5.654	7.34364	1.29884	0.377222	0.0636214	0.110393
sp|P51570|GALK1_HUMAN	GALK1	GALK1_HUMAN Galactokinase	7	5.1619	5.3922	5.81761	6.00733	5.85887	7.57808	7.58635	7.8122	5.59476	7.20887	1.2885	0.365698	0.0690923	0.12575
sp|P29317|EPHA2_HUMAN	EPHA2	EPHA2_HUMAN Ephrin type-A receptor 2	24	5.58587	5.52765	5.93714	6.13004	7.09847	7.18397	7.81522	7.6821	5.79518	7.44494	1.28468	0.361408	0.04958	0.0478988
sp|P57740|NU107_HUMAN	NUP107	NU107_HUMAN Nuclear pore complex protein Nup107	22	5.53189	5.25402	6.00988	6.13277	6.06959	7.56932	8.37796	7.40266	5.73214	7.35488	1.2831	0.359628	0.0716712	0.130103
sp|Q5T3U5|MRP7_HUMAN	ABCC10	MRP7_HUMAN Multidrug resistance-associated protein 7	1	6.6473	6.32337	4.85787	5.69768	8.15608	5.37282	7.56617	9.0579	5.88156	7.53824	1.28168	0.358031	0.133995	0.208077
sp|Q8IV33|K0825_HUMAN	KIAA0825	K0825_HUMAN Uncharacterized protein KIAA0825	2	4.68858	5.56668	9.91704	3.73149	4.77519	13.9689	8.03124	3.78279	5.97595	7.63953	1.27838	0.354316	0.457198	0.601245
sp|Q96JN8|NEUL4_HUMAN	NEURL4	NEUL4_HUMAN Neuralized-like protein 4	1	4.20134	5.63562	6.17933	6.55237	6.137	7.15815	8.30548	7.20058	5.64217	7.2003	1.27616	0.351809	0.18285	0.12302
sp|Q96I59|SYNM_HUMAN	NARS2	SYNM_HUMAN Probable asparagine--tRNA ligase, mitochondrial	12	5.0527	5.23657	6.0505	6.32361	5.89853	6.69849	8.04457	8.00308	5.66585	7.16117	1.26392	0.337904	0.10884	0.146403
sp|Q8WUH2|TGFA1_HUMAN	TGFBRAP1	TGFA1_HUMAN Transforming growth factor-beta receptor-associated protein 1	3	5.5444	5.84735	6.10797	6.09843	6.3851	7.4	8.28429	7.74559	5.89954	7.45374	1.26345	0.337364	0.0450437	0.107325
sp|Q9Y512|SAM50_HUMAN	SAMM50	SAM50_HUMAN Sorting and assembly machinery component 50 homolog	11	5.8317	5.67368	6.05214	6.03638	6.53063	7.77354	7.8704	7.58384	5.89847	7.4396	1.26128	0.334884	0.0305826	0.0830096
sp|P55211|CASP9_HUMAN	CASP9	CASP9_HUMAN Caspase-9	1	6.1227	5.97877	5.05973	4.584	5.98174	6.13422	7.45418	7.76139	5.4363	6.83288	1.2569	0.329869	0.135742	0.132546
sp|P54760|EPHB4_HUMAN	EPHB4	EPHB4_HUMAN Ephrin type-B receptor 4	8	5.87935	5.73278	6.02239	5.96291	6.81427	7.03516	7.79165	7.86095	5.89936	7.37551	1.25022	0.322184	0.02129	0.0717294
sp|Q06547|GABP1_HUMAN	GABPB1	GABP1_HUMAN GA-binding protein subunit beta-1	1	4.64736	4.7472	5.41974	6.33301	6.27727	6.44457	6.89942	6.76322	5.28683	6.59612	1.24765	0.319215	0.147013	0.0432844
sp|P24863|CCNC_HUMAN	CCNC	CCNC_HUMAN Cyclin-C	5	5.73625	5.57007	6.07731	6.13586	7.1691	7.57248	7.03442	7.47104	5.87987	7.31176	1.24352	0.314434	0.0461723	0.0344743
sp|O00479|HMGN4_HUMAN	HMGN4	HMGN4_HUMAN High mobility group nucleosome-binding domain-containing protein 4	1	6.43978	6.16344	4.69136	5.41334	6.37657	8.66195	6.80523	6.33613	5.67698	7.04497	1.24097	0.31147	0.138681	0.155953
sp|P10589|COT1_HUMAN	NR2F1	COT1_HUMAN COUP transcription factor 1	1	5.18116	6.20904	4.79401	6.50998	6.96605	6.93107	6.94262	7.27489	5.67355	7.02866	1.23885	0.308998	0.143999	0.0234467
sp|P61626|LYSC_HUMAN	LYZ	LYSC_HUMAN Lysozyme C	2	5.8017	7.17659	5.02082	4.43125	4.8491	12.4014	5.0093	5.49533	5.60759	6.93878	1.23739	0.307302	0.211693	0.526331
sp|Q5SQN1|SNP47_HUMAN	SNAP47	SNP47_HUMAN Synaptosomal-associated protein 47	2	5.48476	5.39264	6.16722	4.98825	6.4044	7.0505	7.2124	6.57834	5.50822	6.81141	1.23659	0.306368	0.0888504	0.0560929
sp|Q7L1V2|MON1B_HUMAN	MON1B	MON1B_HUMAN Vacuolar fusion protein MON1 homolog B	1	5.42319	6.26183	5.00037	5.9697	6.02919	6.2304	8.20479	7.49627	5.66377	6.99016	1.23419	0.303563	0.0993169	0.148491
sp|Q9NX61|T161A_HUMAN	TMEM161A	T161A_HUMAN Transmembrane protein 161A	2	5.27305	5.61704	5.96665	5.49231	6.85871	6.43918	7.3038	6.97592	5.58726	6.8944	1.23395	0.303284	0.0519312	0.0518086
sp|Q3MII6|TBC25_HUMAN	TBC1D25	TBC25_HUMAN TBC1 domain family member 25	1	4.95008	5.65737	5.72956	5.14089	5.10061	6.04255	7.56946	7.72014	5.36947	6.60819	1.2307	0.299474	0.0713794	0.190481
sp|Q9Y4C2-2|F115A_HUMAN	FAM115A	F115A_HUMAN Isoform 2 of Protein FAM115A	1	5.95494	5.6331	5.65672	6.54965	7.40937	7.04903	7.87891	6.78832	5.9486	7.28141	1.22405	0.291667	0.0717191	0.0649276
sp|Q8IZM8|ZN654_HUMAN	ZNF654	ZN654_HUMAN Zinc finger protein 654	1	5.54139	5.03839	5.57382	6.45315	6.38786	6.40935	7.08385	7.72795	5.65169	6.90225	1.22127	0.288386	0.104013	0.092478
tr|I3L2E1|I3L2E1_HUMAN	CLUAP1	I3L2E1_HUMAN Clusterin-associated protein 1	2	5.56611	5.93174	5.67806	7.28461	6.42925	6.68834	8.59117	8.12402	6.11513	7.45819	1.21963	0.286443	0.129926	0.142285
sp|Q99497|PARK7_HUMAN	PARK7	PARK7_HUMAN Protein DJ-1	50	6.02953	6.50382	5.61971	5.35774	6.2974	8.2019	7.3302	6.79274	5.8777	7.15556	1.21741	0.283813	0.0851804	0.113918
sp|P17544|ATF7_HUMAN	ATF7	ATF7_HUMAN Cyclic AMP-dependent transcription factor ATF-7	2	5.66351	5.55372	5.56308	5.83041	5.61553	7.98175	7.01675	6.75285	5.65268	6.84172	1.21035	0.275424	0.0227302	0.142255
sp|O43488|ARK72_HUMAN	AKR7A2	ARK72_HUMAN Aflatoxin B1 aldehyde reductase member 2	16	5.36685	5.55181	5.63296	6.11429	5.8705	6.78172	7.54637	7.2242	5.66648	6.8557	1.20987	0.274851	0.0562316	0.106154
sp|Q96H55|MYO19_HUMAN	MYO19	MYO19_HUMAN Unconventional myosin-XIX	1	6.18431	5.61781	5.98028	6.06135	6.3388	7.55966	7.88399	6.96379	5.96094	7.18656	1.20561	0.269762	0.0408736	0.0948505
sp|O96011|PX11B_HUMAN	PEX11B	PX11B_HUMAN Peroxisomal membrane protein 11B	4	5.28112	5.56042	6.23509	5.86585	6.18792	6.81224	7.72213	6.91221	5.73562	6.90863	1.20451	0.268449	0.0714403	0.091183
sp|Q14166|TTL12_HUMAN	TTLL12	TTL12_HUMAN Tubulin--tyrosine ligase-like protein 12	30	5.43115	5.26045	5.98033	6.46837	6.3409	6.25055	7.55877	7.71525	5.78507	6.96637	1.2042	0.268071	0.094968	0.111665
sp|Q8NGJ8|O51S1_HUMAN	OR51S1	O51S1_HUMAN Olfactory receptor 51S1	1	4.91998	5.77645	6.17128	6.42866	6.30968	7.49432	7.28954	6.95159	5.82409	7.01128	1.20384	0.267645	0.113276	0.0739538
sp|O15264|MK13_HUMAN	MAPK13	MK13_HUMAN Mitogen-activated protein kinase 13	11	5.4945	6.09135	6.2749	5.95521	7.38915	6.79028	7.28747	7.17946	5.95399	7.16159	1.20282	0.266423	0.0559555	0.0365741
sp|Q9BSY9|DESI2_HUMAN	DESI2	DESI2_HUMAN Desumoylating isopeptidase 2	1	5.38301	5.96045	4.87866	5.80735	5.97845	6.90478	6.62083	6.95308	5.50737	6.61428	1.20099	0.264222	0.0880848	0.0678101
sp|Q9BYD2|RM09_HUMAN	MRPL9	RM09_HUMAN 39S ribosomal protein L9, mitochondrial	11	4.98632	4.98205	5.96781	6.54034	5.89305	6.35735	7.37682	7.35527	5.61913	6.74562	1.20047	0.263605	0.136948	0.109865
sp|O95759|TBCD8_HUMAN	TBC1D8	TBCD8_HUMAN TBC1 domain family member 8	4	5.35348	5.7981	6.46818	6.49726	6.95505	7.43322	7.23424	7.31134	6.02926	7.23346	1.19973	0.262707	0.0919372	0.0280476
sp|P14618|KPYM_HUMAN	PKM	KPYM_HUMAN Pyruvate kinase PKM	34	5.55762	5.526	5.5351	6.2211	6.07607	6.75879	7.3215	7.23589	5.70995	6.84806	1.19932	0.262216	0.0597242	0.0833971
sp|O75752|B3GL1_HUMAN	B3GALNT1	B3GL1_HUMAN UDP-GalNAc:beta-1,3-N-acetylgalactosaminyltransferase 1	1	5.2942	6.30578	5.58518	4.43031	6.83829	5.28257	5.13124	8.67155	5.40387	6.48091	1.19931	0.262205	0.143586	0.254855
sp|P27449|VATL_HUMAN	ATP6V0C	VATL_HUMAN V-type proton ATPase 16 kDa proteolipid subunit	1	5.25908	5.66299	5.52776	6.59381	6.50919	7.05883	6.24023	7.81916	5.76091	6.90685	1.19892	0.261732	0.100694	0.100931
sp|Q6P4A7-3|SFXN4_HUMAN	SFXN4	SFXN4_HUMAN Isoform 3 of Sideroflexin-4	1	4.59848	4.84636	6.33778	7.02197	5.38005	6.84841	8.02883	7.05882	5.70115	6.82903	1.19783	0.260428	0.204965	0.160237
sp|P50395|GDIB_HUMAN	GDI2	GDIB_HUMAN Rab GDP dissociation inhibitor beta	39	5.19935	5.16977	5.87764	6.33056	5.89544	6.51562	7.47233	7.15632	5.64433	6.75993	1.19765	0.260205	0.0996229	0.10361
sp|P55769|NH2L1_HUMAN	NHP2L1	NH2L1_HUMAN NHP2-like protein 1	6	5.7271	5.62512	5.68731	5.80968	6.35174	6.94445	7.00771	7.04093	5.7123	6.83621	1.19675	0.259124	0.0135325	0.0476065
sp|Q03519|TAP2_HUMAN	TAP2	TAP2_HUMAN Antigen peptide transporter 2	5	4.94887	5.63785	5.94701	6.40814	6.75254	6.48893	7.5818	6.62782	5.73547	6.86277	1.19655	0.25888	0.106793	0.0715884
sp|P38935|SMBP2_HUMAN	IGHMBP2	SMBP2_HUMAN DNA-binding protein SMUBP-2	2	5.0347	6.33934	6.3929	5.84419	7.79726	7.49915	5.97178	6.93675	5.90278	7.05124	1.19456	0.256481	0.106599	0.113913
sp|A6NCS6|CB072_HUMAN	C2orf72	CB072_HUMAN Uncharacterized protein C2orf72	1	5.15364	5.70502	5.80613	6.39122	5.77826	7.64582	7.3047	6.81032	5.764	6.88478	1.19444	0.256339	0.0879626	0.118162
sp|P17252|KPCA_HUMAN	PRKCA	KPCA_HUMAN Protein kinase C alpha type	7	5.46278	5.40487	6.04493	6.01192	6.33273	6.36502	7.74409	6.92425	5.73113	6.84152	1.19375	0.255499	0.0600876	0.0964918
sp|Q9NUU7|DD19A_HUMAN	DDX19A	DD19A_HUMAN ATP-dependent RNA helicase DDX19A	4	5.41313	5.57059	5.91231	6.36848	6.13546	7.14475	7.54957	6.9006	5.81613	6.9326	1.19196	0.253337	0.0727459	0.0858281
sp|P84157-3|MXRA7_HUMAN	MXRA7	MXRA7_HUMAN Isoform 3 of Matrix-remodeling-associated protein 7	1	5.9343	6.07154	4.62764	5.40672	6.66464	6.95716	6.74443	5.89508	5.51005	6.56533	1.19152	0.252802	0.118759	0.0706096
sp|Q9UJ68|MSRA_HUMAN	MSRA	MSRA_HUMAN Mitochondrial peptide methionine sulfoxide reductase	4	5.34121	5.54534	5.28846	6.07206	5.5253	7.22325	7.26638	6.47215	5.56177	6.62177	1.19059	0.251673	0.0643277	0.123364
sp|Q9P0J0|NDUAD_HUMAN	NDUFA13	NDUAD_HUMAN NADH dehydrogenase [ubiquinone] 1 alpha subcomplex subunit 13	5	5.57623	5.65559	5.91541	6.17967	6.12075	7.37024	7.42302	6.82035	5.83173	6.93359	1.18894	0.24968	0.0468948	0.0874811
sp|Q86X83|COMD2_HUMAN	COMMD2	COMD2_HUMAN COMM domain-containing protein 2	2	5.54315	5.1151	5.57526	6.43848	5.8305	6.8151	7.43355	6.87338	5.668	6.73813	1.1888	0.24951	0.0978891	0.0988757
sp|Q13445|TMED1_HUMAN	TMED1	TMED1_HUMAN Transmembrane emp24 domain-containing protein 1	4	5.30708	5.60678	5.47408	6.34331	5.65872	6.91214	7.40892	7.0083	5.68281	6.74702	1.18727	0.247645	0.080433	0.112162
sp|O15417|TNC18_HUMAN	TNRC18	TNC18_HUMAN Trinucleotide repeat-containing gene 18 protein	1	4.73603	6.96012	4.34142	5.06328	5.80941	6.46394	5.2713	7.49684	5.27521	6.26037	1.18675	0.247019	0.220161	0.152988
sp|Q96K37|S35E1_HUMAN	SLC35E1	S35E1_HUMAN Solute carrier family 35 member E1	1	5.69556	5.87549	6.25714	6.2046	6.86211	6.73861	7.32026	7.56768	6.0082	7.12216	1.18541	0.245384	0.04465	0.0545282
sp|P15407|FOSL1_HUMAN	FOSL1	FOSL1_HUMAN Fos-related antigen 1	2	6.23454	6.92516	5.98123	5.80252	6.73679	8.0513	7.65291	7.12471	6.23586	7.39143	1.18531	0.245264	0.0789834	0.0782471
sp|Q5TEJ8|THMS2_HUMAN	THEMIS2	THMS2_HUMAN Protein THEMIS2	2	5.99049	5.40144	5.42516	6.1344	7.4298	6.59225	6.26684	6.91512	5.73787	6.801	1.18528	0.245232	0.0661368	0.0728943
sp|A2RUC4|TYW5_HUMAN	TYW5	TYW5_HUMAN tRNA wybutosine-synthesizing protein 5	2	4.93171	5.03563	6.57784	5.98901	6.33897	6.18154	7.27684	6.90561	5.63355	6.67574	1.185	0.244884	0.140075	0.0759792
sp|P62312|LSM6_HUMAN	LSM6	LSM6_HUMAN U6 snRNA-associated Sm-like protein LSm6	10	5.44486	5.96148	5.44554	5.61507	6.10943	6.9565	6.96261	6.58767	5.61674	6.65405	1.18468	0.244501	0.0433311	0.0605941
sp|Q8TF21-2|ANR24_HUMAN	ANKRD24	ANR24_HUMAN Isoform 2 of Ankyrin repeat domain-containing protein 24	1	4.89562	5.43392	4.40174	6.3401	5.5481	6.44433	6.07323	6.88055	5.26784	6.23655	1.18389	0.243536	0.157533	0.0906361
sp|Q7Z7F7-2|RM55_HUMAN	MRPL55	RM55_HUMAN Isoform 2 of 39S ribosomal protein L55, mitochondrial	5	4.74443	4.86019	6.02276	6.81506	5.68876	6.06667	7.43636	7.35483	5.61061	6.63666	1.18288	0.242299	0.176261	0.134171
sp|Q96EY7|PTCD3_HUMAN	PTCD3	PTCD3_HUMAN Pentatricopeptide repeat domain-containing protein 3, mitochondrial	29	5.2172	5.47895	6.00952	6.36829	6.1161	6.81673	7.17394	7.1834	5.76849	6.82254	1.18273	0.242116	0.0898338	0.0734228
sp|Q8N945|PRLD2_HUMAN	PRELID2	PRLD2_HUMAN PRELI domain-containing protein 2	1	6.34876	5.89757	5.11501	5.94093	7.78343	7.04116	6.5389	6.19527	5.82557	6.88969	1.18266	0.24204	0.0884834	0.100104
sp|Q8WXI4|ACO11_HUMAN	ACOT11	ACO11_HUMAN Acyl-coenzyme A thioesterase 11	7	5.94348	5.39436	5.7753	6.13654	6.36085	6.32123	7.07953	7.72252	5.81242	6.87103	1.18213	0.241388	0.0542587	0.0969433
sp|Q8NHU3|SMS2_HUMAN	SGMS2	SMS2_HUMAN Phosphatidylcholine:ceramide cholinephosphotransferase 2	1	5.79196	6.51619	5.15476	5.60805	6.97732	6.71872	5.55866	7.99968	5.76774	6.81359	1.18133	0.24041	0.0981801	0.147192
sp|Q9H078-2|CLPB_HUMAN	CLPB	CLPB_HUMAN Isoform 2 of Caseinolytic peptidase B protein homolog	21	5.43625	5.60679	5.92606	6.25063	6.07259	6.82622	7.50155	7.02945	5.80493	6.85745	1.18131	0.240393	0.0619927	0.0867405
sp|O75394|RM33_HUMAN	MRPL33	RM33_HUMAN 39S ribosomal protein L33, mitochondrial	2	5.39494	4.81407	5.96381	6.53348	6.25657	6.58566	7.01619	6.94328	5.67657	6.70043	1.18036	0.239232	0.13025	0.0523324
tr|H0YJP0|H0YJP0_HUMAN	HECTD1	H0YJP0_HUMAN E3 ubiquitin-protein ligase HECTD1 (Fragment)	1	5.32388	4.96904	7.43308	4.52567	5.17562	7.1809	6.72221	7.16913	5.56292	6.56196	1.17959	0.238286	0.231682	0.144556
sp|O15066|KIF3B_HUMAN	KIF3B	KIF3B_HUMAN Kinesin-like protein KIF3B	2	5.16413	4.99049	6.0555	6.91564	6.17576	6.11002	7.57749	7.40496	5.78144	6.81706	1.17913	0.23772	0.153678	0.114727
sp|Q9HCS7|SYF1_HUMAN	XAB2	SYF1_HUMAN Pre-mRNA-splicing factor SYF1	13	5.84141	5.76445	6.25058	6.35162	6.4802	7.42239	7.31629	7.30725	6.05201	7.13153	1.17837	0.236797	0.0482906	0.0613272
sp|P42768|WASP_HUMAN	WAS	WASP_HUMAN Wiskott-Aldrich syndrome protein	1	6.44866	5.86287	5.61895	5.91898	8.65796	5.78406	6.18924	7.44303	5.96237	7.01857	1.17715	0.235293	0.0585975	0.185398
sp|Q8IWZ6|BBS7_HUMAN	BBS7	BBS7_HUMAN Bardet-Biedl syndrome 7 protein	1	5.44725	5.32122	6.61228	6.41347	5.9864	6.46514	8.13915	7.40914	5.94855	6.99996	1.17675	0.234807	0.110727	0.137484
sp|Q9Y2K2|SIK3_HUMAN	SIK3	SIK3_HUMAN Serine/threonine-protein kinase SIK3	1	6.62898	4.96722	5.30563	5.23486	6.73756	7.602	5.7488	5.95592	5.53417	6.51107	1.17652	0.234527	0.134488	0.129433
sp|O95273|CCDB1_HUMAN	CCNDBP1	CCDB1_HUMAN Cyclin-D1-binding protein 1	3	5.72131	6.14204	4.76468	5.95582	5.97453	6.34434	6.91038	7.33333	5.64596	6.64065	1.17618	0.234104	0.108435	0.090523
sp|Q8NBL1|PGLT1_HUMAN	POGLUT1	PGLT1_HUMAN Protein O-glucosyltransferase 1	12	5.28582	5.59818	5.87068	6.16362	6.23796	6.88823	6.96624	6.85707	5.72958	6.73738	1.17589	0.233758	0.0654975	0.0498851
sp|Q14999-2|CUL7_HUMAN	CUL7	CUL7_HUMAN Isoform 2 of Cullin-7	1	6.17732	6.16874	6.47989	6.1946	7.61396	7.54126	7.43867	6.81485	6.25514	7.35219	1.17538	0.233131	0.0240155	0.0496953
sp|Q8N1S5|S39AB_HUMAN	SLC39A11	S39AB_HUMAN Zinc transporter ZIP11	2	5.65636	4.98852	5.9164	6.19251	5.62053	7.46771	6.86871	6.77467	5.68845	6.6829	1.17482	0.23244	0.090608	0.115504
sp|Q56P03|EAPP_HUMAN	EAPP	EAPP_HUMAN E2F-associated phosphoprotein	3	5.37291	4.87755	5.83208	6.69603	6.35189	6.46383	7.16528	6.73944	5.69464	6.68011	1.17305	0.230267	0.13575	0.0542103
sp|Q66K74|MAP1S_HUMAN	MAP1S	MAP1S_HUMAN Microtubule-associated protein 1S	17	5.95781	5.64523	5.98164	6.10541	6.22005	7.27719	7.4432	6.84412	5.92252	6.94614	1.17283	0.23	0.0330697	0.0786017
sp|Q13045-2|FLII_HUMAN	FLII	FLII_HUMAN Isoform 2 of Protein flightless-1 homolog	2	5.77547	5.36562	7.06991	6.35974	5.6391	6.09309	9.08316	7.96167	6.14269	7.19426	1.17119	0.227976	0.120569	0.223957
sp|Q9Y4X0|AMMR1_HUMAN	AMMECR1	AMMR1_HUMAN AMME syndrome candidate gene 1 protein	4	5.54308	5.52418	5.8166	6.38	6.46646	6.53801	7.39662	6.84203	5.81597	6.81078	1.17105	0.227801	0.0686141	0.0621281
sp|O94925-3|GLSK_HUMAN	GLS	GLSK_HUMAN Isoform 3 of Glutaminase kidney isoform, mitochondrial	3	5.14047	5.71967	6.13905	6.76193	6.58122	6.92313	7.49549	6.81126	5.94028	6.95277	1.17045	0.227058	0.115122	0.0559202
sp|Q0P6H9|TMM62_HUMAN	TMEM62	TMM62_HUMAN Transmembrane protein 62	2	5.1916	5.65175	6.12696	6.56729	6.69888	6.99689	7.10875	6.73124	5.8844	6.88394	1.16986	0.226339	0.100981	0.0291573
sp|Q9NZS9|BFAR_HUMAN	BFAR	BFAR_HUMAN Bifunctional apoptosis regulator	1	4.69579	4.90614	6.1058	7.65876	6.21616	6.85064	6.62622	7.62221	5.84162	6.82881	1.16899	0.225265	0.233043	0.0864832
sp|O75844|FACE1_HUMAN	ZMPSTE24	FACE1_HUMAN CAAX prenyl protease 1 homolog	19	5.37436	5.57372	5.9157	6.11378	6.07742	6.68327	6.97706	7.11046	5.74439	6.71205	1.16845	0.2246	0.0578981	0.0684116
sp|Q96E14|RMI2_HUMAN	RMI2	RMI2_HUMAN RecQ-mediated genome instability protein 2	2	5.55734	6.12511	6.09872	5.94534	6.65911	7.13346	6.90527	7.02202	5.93163	6.92997	1.16831	0.22442	0.0441381	0.0293203
sp|Q15118|PDK1_HUMAN	PDK1	PDK1_HUMAN [Pyruvate dehydrogenase (acetyl-transferring)] kinase isozyme 1, mitochondrial	3	5.5049	6.73938	5.74467	6.11488	6.81648	7.04548	7.1565	7.13297	6.02596	7.03786	1.16792	0.223946	0.0892378	0.0220411
sp|O43570|CAH12_HUMAN	CA12	CAH12_HUMAN Carbonic anhydrase 12	1	7.50017	4.16194	5.35803	3.53332	5.79082	6.16379	5.27443	6.77091	5.13837	5.99999	1.16768	0.22365	0.33999	0.105028
sp|Q92544|TM9S4_HUMAN	TM9SF4	TM9S4_HUMAN Transmembrane 9 superfamily member 4	12	5.10753	5.33521	6.13937	6.39297	5.89804	6.88686	6.82652	7.20112	5.74377	6.70314	1.16703	0.222838	0.107778	0.0837357
sp|Q9BXJ8|T120A_HUMAN	TMEM120A	T120A_HUMAN Transmembrane protein 120A	2	5.77303	6.2867	6.95138	6.47007	6.70058	7.5978	8.78374	6.65117	6.3703	7.43332	1.16687	0.222647	0.076439	0.134515
tr|H3BQF6|H3BQF6_HUMAN		H3BQF6_HUMAN Uncharacterized protein (Fragment)	1	5.47793	5.386	5.69368	6.34782	5.91721	6.29159	7.24323	7.25647	5.72636	6.67713	1.16603	0.221609	0.0757748	0.101657
sp|O75362|ZN217_HUMAN	ZNF217	ZN217_HUMAN Zinc finger protein 217	4	5.05103	5.20117	5.96043	6.04131	6.1045	6.68869	6.3507	6.79366	5.56349	6.48439	1.16553	0.220981	0.0916377	0.0487331
tr|H0YLY0|H0YLY0_HUMAN	CDC42BPB	H0YLY0_HUMAN Serine/threonine-protein kinase MRCK beta (Fragment)	1	5.7759	4.99002	5.18001	6.38784	6.72437	4.85652	7.105	7.34346	5.58344	6.50734	1.16547	0.220912	0.113226	0.173603
sp|Q8IXU6|S35F2_HUMAN	SLC35F2	S35F2_HUMAN Solute carrier family 35 member F2	3	5.68918	5.85807	5.84894	6.25877	6.75701	7.04125	6.59248	7.16622	5.91374	6.88924	1.16495	0.220274	0.0410471	0.037979
sp|P54868|HMCS2_HUMAN	HMGCS2	HMCS2_HUMAN Hydroxymethylglutaryl-CoA synthase, mitochondrial	5	4.66405	7.8856	8.28928	4.81523	8.14247	7.07767	6.29362	8.37078	6.41354	7.47114	1.1649	0.220207	0.302617	0.129342
sp|P02788|TRFL_HUMAN	LTF	TRFL_HUMAN Lactotransferrin	5	5.12118	8.75568	4.95581	4.99006	5.10452	12.5896	5.16179	4.89259	5.95568	6.93712	1.16479	0.220071	0.313654	0.543467
sp|Q9NUU6|F105A_HUMAN	FAM105A	F105A_HUMAN Inactive ubiquitin thioesterase FAM105A	1	5.47339	5.8233	5.19589	7.39266	6.489	7.29357	6.58863	7.44957	5.97131	6.95519	1.16477	0.220043	0.164407	0.0699756
sp|P49406|RM19_HUMAN	MRPL19	RM19_HUMAN 39S ribosomal protein L19, mitochondrial	20	5.21668	5.15939	6.01782	6.75687	5.84742	6.20631	7.4685	7.42858	5.78769	6.7377	1.16414	0.219269	0.130564	0.123772
sp|O95067|CCNB2_HUMAN	CCNB2	CCNB2_HUMAN G2/mitotic-specific cyclin-B2	3	5.6738	5.74137	6.12428	5.8679	6.17114	6.86844	7.03883	7.13962	5.85184	6.80451	1.1628	0.217601	0.0339463	0.0641965
sp|O75554|WBP4_HUMAN	WBP4	WBP4_HUMAN WW domain-binding protein 4	8	5.7318	6.4675	5.54447	5.57211	6.18491	7.77726	6.5902	6.55479	5.82897	6.77679	1.16261	0.217361	0.0743906	0.10207
sp|Q9NVV4-2|PAPD1_HUMAN	MTPAP	PAPD1_HUMAN Isoform 2 of Poly(A) RNA polymerase, mitochondrial	11	5.63067	5.86158	6.34303	6.39883	5.63367	5.98585	6.52193	10.0214	6.05853	7.04071	1.16212	0.216754	0.0616554	0.286961
sp|Q9NR56-5|MBNL1_HUMAN	MBNL1	MBNL1_HUMAN Isoform 5 of Muscleblind-like protein 1	1	4.27814	5.81517	6.03404	7.40631	6.27737	7.31103	7.04291	6.71361	5.88342	6.83623	1.16195	0.216547	0.217743	0.065173
sp|P50995|ANX11_HUMAN	ANXA11	ANX11_HUMAN Annexin A11	26	5.53699	5.59909	5.97494	6.20602	6.3325	6.41383	7.19668	7.13483	5.82926	6.76946	1.16129	0.215728	0.0543902	0.0678783
sp|P62070|RRAS2_HUMAN	RRAS2	RRAS2_HUMAN Ras-related protein R-Ras2	7	5.82967	5.67508	5.75911	5.89312	6.1643	7.0799	6.8183	6.8139	5.78925	6.7191	1.16062	0.214893	0.0161934	0.0580757
sp|P48651|PTSS1_HUMAN	PTDSS1	PTSS1_HUMAN Phosphatidylserine synthase 1	2	5.68532	5.76283	6.8193	6.25327	6.98056	6.52438	7.50963	7.40743	6.13018	7.1055	1.1591	0.213007	0.0854349	0.0633465
tr|K7EKQ2|K7EKQ2_HUMAN	CDC37	K7EKQ2_HUMAN Hsp90 co-chaperone Cdc37 (Fragment)	1	5.1671	7.17895	4.69968	6.45093	5.47018	7.27779	8.6537	5.82675	5.87416	6.80711	1.15882	0.212658	0.19446	0.214232
sp|P09001|RM03_HUMAN	MRPL3	RM03_HUMAN 39S ribosomal protein L3, mitochondrial	27	5.25619	5.45057	5.95972	6.5172	6.11242	6.32233	7.14232	7.27713	5.79592	6.71355	1.15832	0.212038	0.0974811	0.0866777
sp|P10276|RARA_HUMAN	RARA	RARA_HUMAN Retinoic acid receptor alpha	1	6.35592	6.78223	8.11096	6.70075	8.41551	8.47871	8.32711	7.15254	6.98747	8.09347	1.15828	0.211989	0.110405	0.0778849
sp|Q96IY1|NSL1_HUMAN	NSL1	NSL1_HUMAN Kinetochore-associated protein NSL1 homolog	3	5.12179	5.31167	6.19831	6.70013	5.84666	6.56014	7.63566	6.98203	5.83297	6.75612	1.15826	0.211964	0.127641	0.111098
sp|Q96D46|NMD3_HUMAN	NMD3	NMD3_HUMAN 60S ribosomal export protein NMD3	22	5.77563	5.95993	5.86572	5.76492	6.27724	7.2279	6.86449	6.68913	5.84155	6.76469	1.15803	0.211673	0.0155695	0.0583768
sp|Q14142|TRI14_HUMAN	TRIM14	TRI14_HUMAN Tripartite motif-containing protein 14	1	4.69401	6.52986	5.76121	6.40879	7.09639	7.20107	5.56835	7.2133	5.84847	6.76978	1.15753	0.21105	0.14369	0.118566
sp|Q9UPQ8|DOLK_HUMAN	DOLK	DOLK_HUMAN Dolichol kinase	1	6.29186	4.52754	6.50308	6.63454	6.41766	6.84782	6.61912	7.84605	5.98925	6.93266	1.15752	0.211033	0.164402	0.0914187
sp|Q9BVI0|PHF20_HUMAN	PHF20	PHF20_HUMAN PHD finger protein 20	1	5.69621	5.63735	6.3882	5.48422	6.42508	6.737	7.52547	6.17143	5.8015	6.71475	1.15742	0.210908	0.0691568	0.0875531
sp|Q8NFU5|IPMK_HUMAN	IPMK	IPMK_HUMAN Inositol polyphosphate multikinase	1	3.61626	4.50896	7.07362	6.77024	6.58184	7.80641	4.70072	6.33486	5.49227	6.35596	1.15726	0.210707	0.308635	0.200974
sp|Q9NPJ3|ACO13_HUMAN	ACOT13	ACO13_HUMAN Acyl-coenzyme A thioesterase 13	7	5.45276	5.39225	5.85336	5.92483	6.02133	6.76376	6.55128	6.84391	5.6558	6.54507	1.15723	0.210678	0.0481073	0.0565843
sp|Q14669-2|TRIPC_HUMAN	TRIP12	TRIPC_HUMAN Isoform 2 of E3 ubiquitin-protein ligase TRIP12	2	5.65153	5.95323	6.40599	5.62994	7.46187	6.00434	7.15093	6.73629	5.91017	6.83836	1.15705	0.21045	0.061249	0.0921959
sp|Q5HYK3|COQ5_HUMAN	COQ5	COQ5_HUMAN 2-methoxy-6-polyprenyl-1,4-benzoquinol methylase, mitochondrial	4	5.73925	5.34981	6.22798	6.82496	5.99728	6.22823	9.51751	6.18563	6.0355	6.98216	1.15685	0.210201	0.105582	0.242505
sp|Q7L8W6|DPH6_HUMAN	DPH6	DPH6_HUMAN Diphthine--ammonia ligase	3	5.43628	5.97423	6.20065	6.46831	6.83246	6.53551	6.90484	7.57268	6.01987	6.96137	1.1564	0.20964	0.0728165	0.0628824
sp|P21695|GPDA_HUMAN	GPD1	GPDA_HUMAN Glycerol-3-phosphate dehydrogenase [NAD(+)], cytoplasmic	5	5.99698	7.17746	7.28744	5.53997	6.74401	7.93145	7.37928	8.01081	6.50046	7.51639	1.15629	0.209497	0.133335	0.0780351
sp|Q9UGK8|SRGEF_HUMAN	SERGEF	SRGEF_HUMAN Secretion-regulating guanine nucleotide exchange factor	2	5.21628	4.88658	6.67419	6.77622	5.94491	6.71814	7.56437	6.98908	5.88832	6.80413	1.15553	0.208554	0.165849	0.0988756
sp|Q14353|GAMT_HUMAN	GAMT	GAMT_HUMAN Guanidinoacetate N-methyltransferase	8	5.53966	5.83998	6.51294	6.22248	6.43677	6.57055	7.90334	6.92795	6.02876	6.95965	1.15441	0.207153	0.0708159	0.0951785
sp|Q9UPN7|PP6R1_HUMAN	PPP6R1	PP6R1_HUMAN Serine/threonine-protein phosphatase 6 regulatory subunit 1	10	5.63825	6.01687	6.28906	6.15831	6.18779	6.94704	7.38685	7.28789	6.02562	6.95239	1.1538	0.206399	0.0466594	0.0781649
sp|O15235|RT12_HUMAN	MRPS12	RT12_HUMAN 28S ribosomal protein S12, mitochondrial	3	5.36387	5.72184	5.76412	6.43761	6.02056	6.77217	6.8467	7.19699	5.82186	6.7091	1.1524	0.20464	0.0769596	0.0737784
sp|Q969R8|ITFG2_HUMAN	ITFG2	ITFG2_HUMAN Integrin-alpha FG-GAP repeat-containing protein 2	1	4.9471	5.16531	6.27244	6.24703	6.76473	6.13492	6.32981	6.84879	5.65797	6.51956	1.15228	0.204491	0.123829	0.0525741
sp|Q13555-6|KCC2G_HUMAN	CAMK2G	KCC2G_HUMAN Isoform 6 of Calcium/calmodulin-dependent protein kinase type II subunit gamma	12	5.84895	5.61682	6.05387	6.14821	6.1029	6.94916	7.27208	6.932	5.91696	6.81404	1.15161	0.203653	0.0398665	0.073265
sp|P55196-1|AFAD_HUMAN	MLLT4	AFAD_HUMAN Isoform 2 of Afadin	2	5.99293	6.01151	5.59515	6.01677	6.52069	7.90794	6.81424	5.9486	5.90409	6.79787	1.15138	0.203368	0.0349273	0.121026
sp|Q9NP92|RT30_HUMAN	MRPS30	RT30_HUMAN 28S ribosomal protein S30, mitochondrial	14	5.29569	5.0464	6.13974	7.18544	5.61882	5.99598	7.78573	7.84387	5.91682	6.8111	1.15114	0.203066	0.163353	0.17169
sp|Q15147-4|PLCB4_HUMAN	PLCB4	PLCB4_HUMAN Isoform 3 of 1-phosphatidylinositol 4,5-bisphosphate phosphodiesterase beta-4	1	4.90088	5.0071	6.40264	6.80546	5.6014	6.31144	7.23642	7.4398	5.77902	6.64726	1.15024	0.201936	0.167455	0.128294
sp|Q8N2K0-2|ABD12_HUMAN	ABHD12	ABD12_HUMAN Isoform 2 of Monoacylglycerol lipase ABHD12	2	5.94098	5.63732	6.32323	6.47108	7.03504	6.85043	7.39455	6.75284	6.09315	7.00821	1.15018	0.201858	0.0618958	0.040366
sp|P48047|ATPO_HUMAN	ATP5O	ATPO_HUMAN ATP synthase subunit O, mitochondrial	17	5.43275	5.35126	5.80354	6.33527	6.06541	5.99539	7.10331	7.17962	5.73071	6.58593	1.14924	0.200675	0.0782693	0.0976119
sp|Q8NFZ5|TNIP2_HUMAN	TNIP2	TNIP2_HUMAN TNFAIP3-interacting protein 2	1	4.67177	5.76531	6.98482	5.28342	7.20288	5.51909	6.75239	6.61495	5.67633	6.52233	1.14904	0.200428	0.172718	0.109533
sp|O75390|CISY_HUMAN	CS	CISY_HUMAN Citrate synthase, mitochondrial	32	5.6168	5.96132	5.83111	6.1154	6.3387	6.45173	7.04109	7.19786	5.88116	6.75735	1.14898	0.200356	0.0358937	0.062973
sp|O95197-5|RTN3_HUMAN	RTN3	RTN3_HUMAN Isoform 5 of Reticulon-3	1	6.2686	7.4693	8.51567	6.5602	8.15426	9.13431	7.20053	8.59452	7.20344	8.2709	1.14819	0.199359	0.140668	0.0989534
sp|Q2KHT3-2|CL16A_HUMAN	CLEC16A	CL16A_HUMAN Isoform 2 of Protein CLEC16A	1	6.11681	5.77332	6.75737	6.32836	6.11068	7.3392	8.24537	6.97244	6.24397	7.16692	1.14782	0.198891	0.0659286	0.123393
sp|Q9H7Z7|PGES2_HUMAN	PTGES2	PGES2_HUMAN Prostaglandin E synthase 2	23	5.4738	5.42605	5.94298	6.49066	6.21206	6.45901	6.8529	7.25324	5.83337	6.6943	1.14759	0.198604	0.0850969	0.0682091
sp|O00213|APBB1_HUMAN	APBB1	APBB1_HUMAN Amyloid beta A4 precursor protein-binding family B member 1	3	5.2884	6.05079	5.94747	5.78626	6.80137	6.54857	6.54477	6.57757	5.76823	6.61807	1.14733	0.198282	0.0585795	0.0185968
sp|Q9BRJ2|RM45_HUMAN	MRPL45	RM45_HUMAN 39S ribosomal protein L45, mitochondrial	20	5.14729	5.19264	6.16703	6.66485	5.93607	6.28998	7.17143	7.17878	5.79295	6.64407	1.14692	0.197767	0.129079	0.0948202
sp|Q5F1R6-2|DJC21_HUMAN	DNAJC21	DJC21_HUMAN Isoform 2 of DnaJ homolog subfamily C member 21	4	6.19716	6.07836	5.89028	5.43839	5.95207	6.9652	7.08945	7.06459	5.90105	6.76783	1.14689	0.197722	0.0564835	0.0807469
sp|Q9BZE1|RM37_HUMAN	MRPL37	RM37_HUMAN 39S ribosomal protein L37, mitochondrial	16	5.16035	5.17671	6.07285	6.76083	5.5548	6.1337	7.42879	7.45194	5.79269	6.64231	1.14667	0.197452	0.133537	0.143231
sp|P09038|FGF2_HUMAN	FGF2	FGF2_HUMAN Fibroblast growth factor 2	1	5.95312	5.46094	6.55529	4.97616	6.0014	6.82288	6.47449	7.009	5.73638	6.57694	1.14653	0.197277	0.117864	0.0673655
sp|P50991|TCPD_HUMAN	CCT4	TCPD_HUMAN T-complex protein 1 subunit delta	122	5.78894	5.69325	5.99793	6.11739	6.03781	6.73807	7.43439	6.83905	5.89938	6.76233	1.14628	0.196958	0.0327417	0.0846515
sp|P51636|CAV2_HUMAN	CAV2	CAV2_HUMAN Caveolin-2	1	5.83195	5.69343	6.19818	6.53319	7.22418	6.53851	6.86731	7.1645	6.06419	6.94862	1.14585	0.196413	0.0623812	0.0453071
sp|Q6P1L8|RM14_HUMAN	MRPL14	RM14_HUMAN 39S ribosomal protein L14, mitochondrial	5	5.1825	5.56189	6.59267	5.64111	6.16805	6.48694	6.50418	7.16561	5.74454	6.5812	1.14564	0.196158	0.104412	0.0636881
sp|Q9BSV6|SEN34_HUMAN	TSEN34	SEN34_HUMAN tRNA-splicing endonuclease subunit Sen34	12	5.75436	5.70291	6.00575	6.38113	6.40892	6.35238	7.37394	7.17187	5.96104	6.82678	1.14523	0.195641	0.0519613	0.0764955
sp|Q96KP1|EXOC2_HUMAN	EXOC2	EXOC2_HUMAN Exocyst complex component 2	11	5.70964	5.6187	6.38502	6.51794	6.33441	6.89471	7.51557	7.00222	6.05783	6.93673	1.14509	0.195455	0.0758167	0.0698297
sp|P01037|CYTN_HUMAN	CST1	CYTN_HUMAN Cystatin-SN	1	5.75523	7.73875	4.51018	5.97702	5.47241	10.6271	6.2139	5.14333	5.99529	6.86418	1.14493	0.195258	0.221767	0.371239
sp|P24390|ERD21_HUMAN	KDELR1	ERD21_HUMAN ER lumen protein retaining receptor 1	2	6.34654	5.9318	5.85742	6.02887	6.88537	7.24068	6.63791	6.89877	6.04116	6.91568	1.14476	0.195047	0.0356473	0.0358094
sp|Q9UM22|EPDR1_HUMAN	EPDR1	EPDR1_HUMAN Mammalian ependymin-related protein 1	1	5.30911	6.13516	5.18587	4.89948	6.04591	6.49092	6.0803	6.01557	5.38241	6.15817	1.14413	0.194252	0.0985364	0.0362771
sp|Q9H0R4|HDHD2_HUMAN	HDHD2	HDHD2_HUMAN Haloacid dehalogenase-like hydrolase domain-containing protein 2	3	5.81353	5.96209	6.16377	5.57044	5.97065	7.13964	6.81621	6.96635	5.87746	6.72321	1.1439	0.193959	0.0425336	0.0771687
sp|Q8IZQ5|SELH_HUMAN	SELH	SELH_HUMAN Selenoprotein H	4	5.76014	5.77376	6.16614	6.12957	6.24048	6.95029	7.02343	7.04023	5.9574	6.81361	1.14372	0.193735	0.0370114	0.0563688
sp|Q6P1A2|MBOA5_HUMAN	LPCAT3	MBOA5_HUMAN Lysophospholipid acyltransferase 5	5	5.39611	5.54429	6.45432	6.77824	6.27973	6.79756	7.35087	7.21493	6.04324	6.91077	1.14355	0.193525	0.112106	0.0697591
sp|Q6ZTN6-3|AN13D_HUMAN	ANKRD13D	AN13D_HUMAN Isoform 3 of Ankyrin repeat domain-containing protein 13D	2	5.48836	6.25695	6.21589	6.65304	6.95483	5.90437	6.78685	8.49777	6.15356	7.03596	1.1434	0.193325	0.0788648	0.153208
sp|Q9H1A3|METL9_HUMAN	METTL9	METL9_HUMAN Methyltransferase-like protein 9	2	5.96417	5.37814	6.05656	7.42189	6.14027	7.84258	6.76704	7.62897	6.20519	7.09471	1.14335	0.193269	0.139396	0.111076
sp|P05141|ADT2_HUMAN	SLC25A5	ADT2_HUMAN ADP/ATP translocase 2	12	5.62878	5.81558	6.33271	6.27553	6.17544	7.08163	7.22834	7.00021	6.01315	6.8714	1.14273	0.192484	0.0574273	0.0689061
sp|O43929|ORC4_HUMAN	ORC4	ORC4_HUMAN Origin recognition complex subunit 4	7	5.46277	5.425	6.18747	6.49389	6.56452	6.57093	6.6557	7.1411	5.89228	6.73306	1.14269	0.192436	0.0904379	0.04087
sp|Q9NRG7|D39U1_HUMAN	SDR39U1	D39U1_HUMAN Epimerase family protein SDR39U1	4	5.45112	5.58819	6.12096	6.17894	5.804	6.04009	7.42834	7.3965	5.8348	6.66723	1.14267	0.192404	0.0632307	0.129881
sp|Q96BJ8-3|ELMO3_HUMAN	ELMO3	ELMO3_HUMAN Isoform 3 of Engulfment and cell motility protein 3	13	5.70239	5.56295	6.18134	6.61455	6.20352	6.7606	7.30117	7.22171	6.01531	6.87175	1.14238	0.192039	0.0796811	0.0735221
sp|Q4J6C6|PPCEL_HUMAN	PREPL	PPCEL_HUMAN Prolyl endopeptidase-like	18	5.80947	5.62828	6.06021	6.43925	6.37973	6.69965	7.26301	6.99589	5.9843	6.83457	1.14208	0.191667	0.0586895	0.0556938
sp|Q9P0S9|TM14C_HUMAN	TMEM14C	TM14C_HUMAN Transmembrane protein 14C	1	5.35253	5.54861	6.36678	6.34727	6.63902	6.57581	7.02457	6.72351	5.9038	6.74073	1.14176	0.191261	0.0896861	0.0294726
sp|Q15008|PSMD6_HUMAN	PSMD6	PSMD6_HUMAN 26S proteasome non-ATPase regulatory subunit 6	28	5.7922	5.88092	5.91547	6.12659	6.32005	6.58148	7.1143	7.05943	5.9288	6.76882	1.14168	0.191164	0.0239031	0.0565981
sp|P02042|HBD_HUMAN	HBD	HBD_HUMAN Hemoglobin subunit delta	4	4.09656	5.89773	3.77757	4.53639	3.67312	4.77948	7.1717	5.26926	4.57706	5.22339	1.14121	0.190564	0.204015	0.279591
sp|P68371|TBB4B_HUMAN	TUBB4B	TBB4B_HUMAN Tubulin beta-4B chain	44	5.1327	5.09175	6.39059	6.4177	5.86809	6.40789	6.92252	7.08137	5.75819	6.56997	1.14098	0.190272	0.129582	0.0835863
sp|Q9UM54-6|MYO6_HUMAN	MYO6	MYO6_HUMAN Isoform 6 of Unconventional myosin-VI	62	5.32651	5.62072	5.94199	6.14768	6.05052	5.88635	7.02649	7.30523	5.75923	6.56715	1.14028	0.189392	0.0626631	0.107175
sp|Q9UKK6|NXT1_HUMAN	NXT1	NXT1_HUMAN NTF2-related export protein 1	1	5.36838	4.7387	6.34453	5.90213	5.22889	6.06243	7.45887	6.73641	5.58843	6.37165	1.14015	0.189223	0.123998	0.149349
sp|Q9NYT0|PLEK2_HUMAN	PLEK2	PLEK2_HUMAN Pleckstrin-2	4	5.68698	6.33068	6.18014	5.97964	6.85661	6.58513	7.34835	6.76991	6.04436	6.89	1.13991	0.188914	0.0460401	0.0472956
sp|P15531-2|NDKA_HUMAN	NME1	NDKA_HUMAN Isoform 2 of Nucleoside diphosphate kinase A	3	5.09013	5.57505	6.86011	5.23104	6.95327	6.96292	5.08255	6.92735	5.68908	6.48152	1.13929	0.188137	0.141818	0.143912
sp|Q86YB8|ERO1B_HUMAN	ERO1LB	ERO1B_HUMAN ERO1-like protein beta	1	5.02469	6.95064	6.04768	6.63082	7.38605	6.26274	7.4436	6.99491	6.16346	7.02183	1.13927	0.188106	0.137297	0.0774588
sp|Q8NE00|TM104_HUMAN	TMEM104	TM104_HUMAN Transmembrane protein 104	1	6.06667	5.20438	5.84681	5.97563	6.00714	6.99951	6.27579	7.02088	5.77337	6.57583	1.13899	0.187759	0.067535	0.078087
sp|Q14181|DPOA2_HUMAN	POLA2	DPOA2_HUMAN DNA polymerase alpha subunit B	10	5.81561	5.49187	6.23301	6.02081	6.69138	6.58584	6.84491	6.70356	5.89032	6.70642	1.13855	0.187196	0.0535792	0.0158632
sp|P49755|TMEDA_HUMAN	TMED10	TMEDA_HUMAN Transmembrane emp24 domain-containing protein 10	16	5.78797	6.0182	5.67477	6.06422	6.24427	6.79763	6.72047	7.04339	5.88629	6.70144	1.13848	0.187113	0.0315499	0.0499056
sp|Q8N490-2|PNKD_HUMAN	PNKD	PNKD_HUMAN Isoform 2 of Probable hydrolase PNKD	2	5.81765	5.86699	5.71897	5.54474	6.57743	6.14476	6.82455	6.57946	5.73709	6.53155	1.13848	0.187107	0.0247919	0.0432911
sp|Q96FX7|TRM61_HUMAN	TRMT61A	TRM61_HUMAN tRNA (adenine(58)-N(1))-methyltransferase catalytic subunit TRMT61A	2	5.05151	4.84571	6.04702	6.47184	5.57999	6.37817	6.62194	6.93496	5.60402	6.37877	1.13825	0.186815	0.139356	0.0908063
sp|Q9HAP2|MLXIP_HUMAN	MLXIP	MLXIP_HUMAN MLX-interacting protein	1	5.46978	6.12898	6.18131	6.03439	6.31255	7.11572	6.94269	6.73148	5.95362	6.77561	1.13807	0.186585	0.0551324	0.0511234
sp|O00231|PSD11_HUMAN	PSMD11	PSD11_HUMAN 26S proteasome non-ATPase regulatory subunit 11	49	5.69736	5.64254	5.89993	6.22779	6.29728	6.49537	6.9163	6.99648	5.86691	6.67636	1.13797	0.186462	0.0451406	0.0501645
sp|P04818|TYSY_HUMAN	TYMS	TYSY_HUMAN Thymidylate synthase	11	5.5677	5.60048	6.455	6.38771	6.47016	6.7242	7.09634	7.03244	6.00272	6.83079	1.13795	0.186434	0.0806901	0.0424797
sp|Q9Y2H1|ST38L_HUMAN	STK38L	ST38L_HUMAN Serine/threonine-protein kinase 38-like	4	5.27191	5.97038	6.10097	6.49787	6.32755	6.56364	7.2707	6.95435	5.96028	6.77906	1.13737	0.185705	0.0857007	0.061574
sp|A6NHX0|GATL2_HUMAN	GATSL2	GATL2_HUMAN GATS-like protein 2	3	5.80629	5.4908	6.29476	6.06123	6.51063	6.61537	6.89907	6.87444	5.91327	6.72488	1.13725	0.185552	0.058366	0.0285525
sp|Q6YN16|HSDL2_HUMAN	HSDL2	HSDL2_HUMAN Hydroxysteroid dehydrogenase-like protein 2	18	5.80785	5.75466	6.23774	6.48374	6.60158	6.60419	7.22423	7.18262	6.071	6.90315	1.13707	0.185322	0.0576492	0.0502871
sp|P13010|XRCC5_HUMAN	XRCC5	XRCC5_HUMAN X-ray repair cross-complementing protein 5	90	5.63327	5.57981	6.10273	6.21831	6.24205	6.66265	6.9595	6.89456	5.88353	6.68969	1.13702	0.185257	0.0550755	0.048506
sp|P05062|ALDOB_HUMAN	ALDOB	ALDOB_HUMAN Fructose-bisphosphate aldolase B	3	3.60978	3.36601	3.08004	3.6439	3.82384	3.57442	3.58865	4.58896	3.42493	3.89397	1.13695	0.185165	0.0762385	0.122558
sp|P35270|SPRE_HUMAN	SPR	SPRE_HUMAN Sepiapterin reductase	17	5.64738	5.62044	5.9058	6.11555	6.2485	6.13007	6.96137	7.13777	5.82229	6.61943	1.13691	0.185119	0.0401958	0.0761702
sp|Q96GD4|AURKB_HUMAN	AURKB	AURKB_HUMAN Aurora kinase B	1	5.90645	5.6214	6.39674	6.19251	6.29473	6.83107	7.02563	7.2561	6.02928	6.85188	1.13644	0.184516	0.0560919	0.0598454
sp|P29033|CXB2_HUMAN	GJB2	CXB2_HUMAN Gap junction beta-2 protein	1	6.78051	5.597	6.45787	5.05749	6.54416	7.79783	6.3986	6.41189	5.97322	6.78812	1.13643	0.184504	0.132059	0.0996358
sp|O75880|SCO1_HUMAN	SCO1	SCO1_HUMAN Protein SCO1 homolog, mitochondrial	3	6.00993	5.67005	6.25444	6.10571	6.69616	6.6902	6.84804	7.08319	6.01003	6.8294	1.13633	0.184386	0.0412605	0.0269845
sp|Q53GQ0|DHB12_HUMAN	HSD17B12	DHB12_HUMAN Estradiol 17-beta-dehydrogenase 12	17	5.95612	5.96796	6.22117	6.07969	6.73501	6.62699	7.21166	6.94728	6.05624	6.88023	1.13606	0.184037	0.0203504	0.0374864
sp|Q00536-2|CDK16_HUMAN	CDK16	CDK16_HUMAN Isoform 2 of Cyclin-dependent kinase 16	8	5.10718	5.14197	5.90861	6.24211	5.92671	6.11269	6.66531	6.73151	5.59997	6.35905	1.13555	0.183394	0.101027	0.0629111
sp|O76083|PDE9A_HUMAN	PDE9A	PDE9A_HUMAN High affinity cGMP-specific 3',5'-cyclic phosphodiesterase 9A	1	5.1358	5.46284	6.28157	6.75652	6.25424	6.71396	6.86479	7.00742	5.90918	6.7101	1.13554	0.183376	0.125655	0.0486842
sp|Q8NCE0|SEN2_HUMAN	TSEN2	SEN2_HUMAN tRNA-splicing endonuclease subunit Sen2	9	5.40788	5.4059	6.15149	6.34158	6.0865	6.4315	7.10627	6.84044	5.82671	6.61618	1.13549	0.183316	0.0842572	0.0678833
sp|Q9H1C3|GL8D2_HUMAN	GLT8D2	GL8D2_HUMAN Glycosyltransferase 8 domain-containing protein 2	1	4.87571	5.61548	6.57579	6.13964	6.11226	6.63274	7.69241	5.90971	5.80166	6.58678	1.13533	0.183109	0.126096	0.121079
sp|Q9BZL4|PP12C_HUMAN	PPP1R12C	PP12C_HUMAN Protein phosphatase 1 regulatory subunit 12C	6	5.84679	6.15003	6.16262	6.17034	6.70528	7.17768	6.85512	6.88332	6.08244	6.90535	1.13529	0.183063	0.0258656	0.0286232
sp|Q9P0W2|HM20B_HUMAN	HMG20B	HM20B_HUMAN SWI/SNF-related matrix-associated actin-dependent regulator of chromatin subfamily E member 1-related	2	5.78501	5.80282	6.11798	5.87363	6.73499	6.50356	6.48958	7.03809	5.89486	6.69156	1.13515	0.182884	0.0260553	0.0384029
sp|P49711|CTCF_HUMAN	CTCF	CTCF_HUMAN Transcriptional repressor CTCF	9	6.01893	5.81392	5.25166	5.8273	6.63638	7.33325	6.06854	5.96605	5.72795	6.50105	1.13497	0.182654	0.0577956	0.0966409
sp|Q9Y576|ASB1_HUMAN	ASB1	ASB1_HUMAN Ankyrin repeat and SOCS box protein 1	1	5.96494	6.11967	6.15069	5.59485	7.02038	6.08873	6.17696	7.72817	5.95754	6.75356	1.13362	0.180932	0.0428157	0.114552
sp|Q96LU5|IMP1L_HUMAN	IMMP1L	IMP1L_HUMAN Mitochondrial inner membrane protease subunit 1	1	4.91274	5.39211	6.50202	6.3226	6.37179	6.75896	6.35345	6.73152	5.78237	6.55393	1.13343	0.1807	0.130883	0.0337685
sp|P68543|UBX2A_HUMAN	UBXN2A	UBX2A_HUMAN UBX domain-containing protein 2A	1	4.18328	6.77316	6.41982	6.58383	6.93553	6.73464	6.64596	6.83841	5.99002	6.78863	1.13332	0.18056	0.202523	0.0185018
sp|O60858-3|TRI13_HUMAN	TRIM13	TRI13_HUMAN Isoform 3 of E3 ubiquitin-protein ligase TRIM13	1	5.57514	5.81791	6.12613	6.43889	6.69349	6.24217	6.96902	7.24183	5.98952	6.78663	1.13308	0.180255	0.0626006	0.0628372
sp|P47897|SYQ_HUMAN	QARS	SYQ_HUMAN Glutamine--tRNA ligase	56	5.66601	5.61787	6.23358	6.28597	6.43521	6.4382	7.04797	7.03705	5.95086	6.73961	1.13254	0.179567	0.0601406	0.051901
sp|P51817|PRKX_HUMAN	PRKX	PRKX_HUMAN cAMP-dependent protein kinase catalytic subunit PRKX	1	5.80001	5.65662	6.03093	6.15627	6.28829	6.70501	6.92788	6.84776	5.91096	6.69224	1.13217	0.179096	0.0380265	0.0425321
sp|P40616|ARL1_HUMAN	ARL1	ARL1_HUMAN ADP-ribosylation factor-like protein 1	11	6.09381	6.37639	6.0516	5.56387	6.53041	6.85987	6.97906	6.89332	6.02142	6.81567	1.1319	0.178751	0.0560325	0.0288575
sp|Q9HA64|KT3K_HUMAN	FN3KRP	KT3K_HUMAN Ketosamine-3-kinase	6	5.95423	6.0845	5.50425	5.75949	6.02249	7.58441	6.55978	6.20314	5.82562	6.59246	1.13163	0.178405	0.0433365	0.105873
sp|P82663|RT25_HUMAN	MRPS25	RT25_HUMAN 28S ribosomal protein S25, mitochondrial	9	5.12008	5.22019	6.08908	6.79201	5.8189	6.48699	6.82264	7.14425	5.80534	6.56819	1.13141	0.178116	0.135853	0.0863319
sp|Q9Y530|OARD1_HUMAN	OARD1	OARD1_HUMAN O-acetyl-ADP-ribose deacetylase 1	5	5.65161	6.0197	6.33077	6.02572	6.50701	6.46617	7.09307	7.11682	6.00695	6.79577	1.13132	0.178004	0.0462586	0.0526104
sp|Q5T2S8|ARMC4_HUMAN	ARMC4	ARMC4_HUMAN Armadillo repeat-containing protein 4	1	5.99614	6.31289	6.47328	5.86958	6.60072	7.15528	7.46236	6.66379	6.16297	6.97054	1.13103	0.177644	0.0451884	0.0589692
sp|Q32NC0|CR021_HUMAN	C18orf21	CR021_HUMAN UPF0711 protein C18orf21	1	6.25041	6.05676	5.93617	5.76872	7.00672	7.01415	6.76513	6.37224	6.00301	6.78956	1.13102	0.177631	0.0337928	0.0443775
tr|B9ZVU2|B9ZVU2_HUMAN	DNPEP	B9ZVU2_HUMAN Aspartyl aminopeptidase (Fragment)	1	6.10623	5.73706	5.99877	5.69014	6.94043	7.55726	5.78437	6.33081	5.88305	6.65322	1.13091	0.177488	0.0342398	0.115079
sp|Q9UK39|NOCT_HUMAN	CCRN4L	NOCT_HUMAN Nocturnin	4	5.5987	5.54548	6.55089	6.79168	6.32562	7.02531	7.39695	6.9382	6.12169	6.92152	1.13066	0.177159	0.104964	0.0641897
sp|Q9BYX7|ACTBM_HUMAN	POTEKP	ACTBM_HUMAN Putative beta-actin-like protein 3	7	5.41895	5.28441	6.22125	6.11006	6.61695	6.53019	6.40181	6.49266	5.75867	6.5104	1.13054	0.177012	0.0825399	0.0136957
sp|Q14257|RCN2_HUMAN	RCN2	RCN2_HUMAN Reticulocalbin-2	23	5.88449	5.7305	6.15425	6.10514	6.40202	6.73994	6.99988	6.84336	5.96859	6.7463	1.1303	0.176705	0.0330696	0.037528
sp|Q96EW2|HBAP1_HUMAN	HSPBAP1	HBAP1_HUMAN HSPB1-associated protein 1	2	5.11517	5.90896	6.04942	6.01824	6.52073	6.52511	6.48604	6.56773	5.77295	6.5249	1.13025	0.176648	0.0766739	0.00513051
sp|Q8IXM2-3|BAP18_HUMAN	BAP18	BAP18_HUMAN Isoform 3 of Chromatin complexes subunit BAP18	1	4.99265	6.34064	6.79951	5.75527	6.45622	7.34751	6.92501	6.2704	5.97202	6.74979	1.13024	0.176623	0.130665	0.0717673
sp|Q9BPW8|NIPS1_HUMAN	NIPSNAP1	NIPS1_HUMAN Protein NipSnap homolog 1	14	5.37287	5.18165	6.10694	6.61239	5.91863	5.83479	7.27386	7.27742	5.81846	6.57618	1.13023	0.176611	0.113901	0.122928
sp|Q5T0D9|TPRGL_HUMAN	TPRG1L	TPRGL_HUMAN Tumor protein p63-regulated gene 1-like protein	7	6.01249	5.25382	6.3038	6.05727	6.32127	6.39377	6.96382	7.01938	5.90684	6.67456	1.12997	0.176285	0.0768261	0.0551318
sp|Q96IU4|ABHEB_HUMAN	ABHD14B	ABHEB_HUMAN Alpha/beta hydrolase domain-containing protein 14B	11	5.6786	5.90168	5.87692	6.45737	6.59309	6.7727	6.68281	6.97288	5.97864	6.75537	1.12992	0.176217	0.0559329	0.0240537
sp|Q8WXE1|ATRIP_HUMAN	ATRIP	ATRIP_HUMAN ATR-interacting protein	2	5.6065	5.50935	6.9914	5.84026	6.92806	7.07549	6.52717	6.52688	5.98688	6.7644	1.12987	0.176158	0.114238	0.0414859
sp|Q16610-2|ECM1_HUMAN	ECM1	ECM1_HUMAN Isoform 2 of Extracellular matrix protein 1	1	5.6214	6.14425	10.0042	4.06324	4.78012	12.2673	8.41705	3.71918	6.45827	7.29591	1.1297	0.17594	0.390786	0.531396
sp|Q567V2|M17L2_HUMAN	MPV17L2	M17L2_HUMAN Mpv17-like protein 2	4	6.01494	5.58655	6.68415	6.27535	6.99021	6.77938	7.24358	6.73264	6.14025	6.93645	1.12967	0.175901	0.0750079	0.0336485
sp|Q9UKL3|C8AP2_HUMAN	CASP8AP2	C8AP2_HUMAN CASP8-associated protein 2	1	4.95378	5.05613	7.23394	6.41624	6.32266	6.23534	8.14752	6.01876	5.91502	6.68107	1.12951	0.175696	0.186541	0.147573
sp|O75052|CAPON_HUMAN	NOS1AP	CAPON_HUMAN Carboxyl-terminal PDZ ligand of neuronal nitric oxide synthase protein	3	6.55643	6.80664	5.40285	5.40748	6.36301	7.51186	6.87108	6.54727	6.04335	6.82331	1.12906	0.175122	0.123104	0.0739812
sp|Q12840|KIF5A_HUMAN	KIF5A	KIF5A_HUMAN Kinesin heavy chain isoform 5A	12	5.75326	5.50216	5.94461	6.3577	6.29595	6.07177	7.1222	7.09782	5.88943	6.64694	1.12862	0.174561	0.0612867	0.0816286
sp|O60749|SNX2_HUMAN	SNX2	SNX2_HUMAN Sorting nexin-2	20	5.574	5.53771	5.96261	6.36726	6.15559	6.235	6.89067	7.15399	5.8604	6.60881	1.12771	0.173393	0.0663445	0.074221
sp|Q9H993|CF211_HUMAN	C6orf211	CF211_HUMAN UPF0364 protein C6orf211	14	5.78456	5.40192	6.36115	6.32262	6.37929	6.40353	7.27637	6.85641	5.96756	6.7289	1.12758	0.173229	0.0770602	0.0632885
sp|Q9NWQ4|GPT2L_HUMAN	GPATCH2L	GPT2L_HUMAN G patch domain-containing protein 2-like	1	7.09102	5.25696	6.28466	6.11881	7.11129	6.6907	6.63047	7.47624	6.18786	6.97717	1.12756	0.173202	0.121525	0.0566887
sp|P82921|RT21_HUMAN	MRPS21	RT21_HUMAN 28S ribosomal protein S21, mitochondrial	4	5.85056	5.39742	6.17833	6.24779	6.54425	6.21242	6.7475	7.18652	5.91853	6.67267	1.12742	0.173027	0.0655897	0.0610574
sp|O95271|TNKS1_HUMAN	TNKS	TNKS1_HUMAN Tankyrase-1	3	5.58142	5.54623	6.25658	6.1036	6.18403	6.70594	6.85151	6.7385	5.87196	6.61999	1.12739	0.172989	0.0615682	0.0449037
sp|P23610|F8I2_HUMAN	F8A1	F8I2_HUMAN Factor VIII intron 22 protein	2	5.59855	6.09395	6.68402	6.58705	6.34839	6.8128	7.29227	7.6817	6.24089	7.03379	1.12705	0.17255	0.0801372	0.0822959
sp|Q9Y689|ARL5A_HUMAN	ARL5A	ARL5A_HUMAN ADP-ribosylation factor-like protein 5A	2	5.52795	5.46963	6.27057	6.58542	7.47953	6.34327	6.114	6.9465	5.96339	6.72083	1.12701	0.172505	0.0925939	0.0916143
sp|P31327-3|CPSM_HUMAN	CPS1	CPSM_HUMAN Isoform 3 of Carbamoyl-phosphate synthase [ammonia], mitochondrial	56	5.15707	5.70604	5.89771	6.09196	6.99446	5.74297	6.5479	6.4655	5.71319	6.43771	1.12681	0.172249	0.0705101	0.0804922
sp|A4D2P6|GRD2I_HUMAN	GRID2IP	GRD2I_HUMAN Delphilin	1	6.23071	4.06042	5.28079	7.47029	6.75641	4.36117	6.66882	8.17733	5.76055	6.49093	1.12679	0.172219	0.25086	0.243299
sp|Q15526|SURF1_HUMAN	SURF1	SURF1_HUMAN Surfeit locus protein 1	10	5.81939	5.81533	6.00836	6.31673	6.12351	6.773	7.06051	7.03039	5.98995	6.74685	1.12636	0.17167	0.0393544	0.0644938
sp|Q9BXC9|BBS2_HUMAN	BBS2	BBS2_HUMAN Bardet-Biedl syndrome 2 protein	2	5.40675	5.66195	6.0063	6.26514	6.02182	6.726	6.62145	6.91984	5.83503	6.57228	1.12635	0.171652	0.0647098	0.0589194
sp|Q96SK2|TM209_HUMAN	TMEM209	TM209_HUMAN Transmembrane protein 209	4	5.60508	4.60392	6.72911	6.81364	5.86474	6.91437	7.46314	6.50671	5.93794	6.68724	1.12619	0.171449	0.176178	0.100784
tr|G5EA36|G5EA36_HUMAN	CDC27	G5EA36_HUMAN Cell division cycle 27, isoform CRA_c	1	5.76054	5.57776	6.45681	5.95728	5.65051	6.64142	7.95311	6.5004	5.9381	6.68636	1.12601	0.17122	0.0638161	0.142257
sp|Q8N8R3|MCATL_HUMAN	SLC25A29	MCATL_HUMAN Mitochondrial carnitine/acylcarnitine carrier protein CACL	4	5.80068	5.57272	6.57911	6.09085	6.59353	6.80136	6.90777	6.76114	6.01084	6.76595	1.12562	0.170726	0.0722272	0.019293
sp|Q14156|EFR3A_HUMAN	EFR3A	EFR3A_HUMAN Protein EFR3 homolog A	1	5.44243	6.41872	7.25078	4.98403	5.75665	7.95078	7.2223	6.19308	6.02399	6.7807	1.12562	0.170715	0.168217	0.146443
sp|Q9Y584|TIM22_HUMAN	TIMM22	TIM22_HUMAN Mitochondrial import inner membrane translocase subunit Tim22	2	6.21222	5.76428	5.75208	5.84175	6.33877	7.03976	6.82621	6.32305	5.89258	6.63195	1.12547	0.170533	0.0367852	0.0540462
sp|P07199|CENPB_HUMAN	CENPB	CENPB_HUMAN Major centromere autoantigen B	1	4.99709	7.05846	7.41883	5.29041	5.60217	6.86523	8.2053	7.18886	6.1912	6.96539	1.12505	0.169986	0.197744	0.154086
sp|Q9Y2R9|RT07_HUMAN	MRPS7	RT07_HUMAN 28S ribosomal protein S7, mitochondrial	13	5.7345	5.70771	5.70037	6.29123	6.47835	6.61982	6.68932	6.572	5.85845	6.58987	1.12485	0.169731	0.0493118	0.013443
sp|P11586|C1TC_HUMAN	MTHFD1	C1TC_HUMAN C-1-tetrahydrofolate synthase, cytoplasmic	67	5.86799	5.72933	6.15668	6.33209	6.37495	6.56558	7.20204	6.94217	6.02152	6.77119	1.1245	0.16928	0.0453456	0.0548722
sp|Q02833|RASF7_HUMAN	RASSF7	RASF7_HUMAN Ras association domain-containing protein 7	2	5.84497	6.92805	5.78891	5.42488	6.02268	7.28514	7.33	6.33481	5.9967	6.74316	1.12448	0.169255	0.108097	0.0985177
sp|Q96EK5|KBP_HUMAN	KIAA1279	KBP_HUMAN KIF1-binding protein	26	5.7606	5.55112	6.18106	6.42416	6.35239	6.49463	7.17854	6.86305	5.97924	6.72215	1.12425	0.168962	0.0661818	0.055438
sp|Q8TAA9|VANG1_HUMAN	VANGL1	VANG1_HUMAN Vang-like protein 1	10	5.50735	5.54264	6.11295	6.20594	6.01459	6.44892	7.07145	6.7259	5.84222	6.56521	1.12375	0.168326	0.0630828	0.0680508
sp|P58557|YBEY_HUMAN	YBEY	YBEY_HUMAN Putative ribonuclease	3	5.51751	5.60735	6.37274	6.29272	6.83928	6.77258	6.46774	6.65138	5.94758	6.68274	1.12361	0.168138	0.0752301	0.024403
sp|Q16891-2|IMMT_HUMAN	IMMT	IMMT_HUMAN Isoform 2 of Mitochondrial inner membrane protein	2	5.01778	5.32272	6.88688	6.75473	5.76111	6.72435	7.97943	6.47709	5.99553	6.7355	1.12342	0.167897	0.160546	0.137247
sp|Q9BYD1|RM13_HUMAN	MRPL13	RM13_HUMAN 39S ribosomal protein L13, mitochondrial	17	5.05688	5.18006	6.20986	6.76282	5.85937	6.28039	6.89688	7.03021	5.80241	6.51671	1.12311	0.167493	0.141822	0.0838692
sp|Q9NR80|ARHG4_HUMAN	ARHGEF4	ARHG4_HUMAN Rho guanine nucleotide exchange factor 4	1	5.53878	5.70613	6.43407	6.67006	6.84202	7.10749	6.5907	6.80545	6.08726	6.83642	1.12307	0.167447	0.0902791	0.0310122
sp|Q6NXG1-4|ESRP1_HUMAN	ESRP1	ESRP1_HUMAN Isoform 4 of Epithelial splicing regulatory protein 1	1	6.28319	7.11374	7.33331	7.0861	7.30039	7.93476	7.78158	8.21664	6.95409	7.80834	1.12284	0.167156	0.0662538	0.0491255
sp|Q9Y496|KIF3A_HUMAN	KIF3A	KIF3A_HUMAN Kinesin-like protein KIF3A	5	5.67854	5.70096	6.04336	6.73103	6.51123	6.21577	7.09942	7.28744	6.03847	6.77846	1.12255	0.166775	0.0813054	0.0737683
sp|Q16644|MAPK3_HUMAN	MAPKAPK3	MAPK3_HUMAN MAP kinase-activated protein kinase 3	6	5.34938	5.45808	6.24252	6.46782	6.14235	6.2436	7.03477	6.9783	5.87945	6.59976	1.12251	0.166731	0.0950304	0.0715311
tr|B4DTU4|B4DTU4_HUMAN	LIG1	B4DTU4_HUMAN DNA ligase	1	5.97968	5.68036	5.72156	5.66985	5.85971	6.73061	6.8628	6.42067	5.76286	6.46845	1.12244	0.166634	0.0253793	0.0689697
sp|P49189|AL9A1_HUMAN	ALDH9A1	AL9A1_HUMAN 4-trimethylaminobutyraldehyde dehydrogenase	30	5.37032	5.7398	6.0596	6.38369	6.10286	6.2512	6.99397	7.08863	5.88835	6.60917	1.12241	0.166604	0.0737076	0.0762776
sp|Q9HBH5|RDH14_HUMAN	RDH14	RDH14_HUMAN Retinol dehydrogenase 14	9	5.64766	5.72651	6.39488	6.36426	6.31047	6.54375	7.22793	6.99632	6.03333	6.76962	1.12204	0.16612	0.066513	0.0616937
sp|Q9Y2V0|CO041_HUMAN	C15orf41	CO041_HUMAN Uncharacterized protein C15orf41	1	5.16575	5.75575	5.11949	7.96933	6.80141	5.99738	7.1848	6.95498	6.00258	6.73464	1.12196	0.166019	0.2237	0.0766397
sp|Q8NFY9|KBTB8_HUMAN	KBTBD8	KBTB8_HUMAN Kelch repeat and BTB domain-containing protein 8	1	6.23977	5.29254	6.20794	6.684	5.81969	6.18065	7.54495	7.85644	6.10606	6.85043	1.12191	0.165953	0.0956856	0.146109
sp|Q9Y664|KPTN_HUMAN	KPTN	KPTN_HUMAN Kaptin	1	6.04157	5.63969	6.1709	5.93485	5.79164	6.98389	6.83269	7.07642	5.94675	6.67116	1.12182	0.165836	0.0380577	0.0891734
sp|P08758|ANXA5_HUMAN	ANXA5	ANXA5_HUMAN Annexin A5	56	5.66388	5.45118	5.91045	6.20406	6.07526	6.26392	6.89399	6.82417	5.80739	6.51433	1.12173	0.165727	0.0558371	0.0623948
sp|Q9Y3D8|KAD6_HUMAN	AK6	KAD6_HUMAN Adenylate kinase isoenzyme 6	7	5.65997	5.61407	6.1729	6.0792	6.24717	6.47877	6.71123	6.95073	5.88153	6.59697	1.12164	0.165612	0.048548	0.0458555
sp|Q16526|CRY1_HUMAN	CRY1	CRY1_HUMAN Cryptochrome-1	3	5.43063	5.48486	6.4383	6.49086	6.39706	6.60671	7.13634	6.60201	5.96116	6.68553	1.12151	0.165448	0.097651	0.0472714
sp|Q9BTE3|MCMBP_HUMAN	MCMBP	MCMBP_HUMAN Mini-chromosome maintenance complex-binding protein	37	5.75843	5.68451	6.23889	6.36529	6.27293	6.38147	7.17592	7.12615	6.01178	6.73912	1.12099	0.164767	0.0566404	0.0709489
sp|Q9H496|IFG15_HUMAN	IFRG15	IFG15_HUMAN 15 kDa interferon-responsive protein	1	6.0599	5.83945	6.23377	6.74878	7.59849	5.90128	6.0812	8.30789	6.22047	6.97222	1.12085	0.164592	0.062279	0.16802
sp|Q9H4L5-2|OSBL3_HUMAN	OSBPL3	OSBL3_HUMAN Isoform 1b of Oxysterol-binding protein-related protein 3	18	5.42553	5.47832	6.32422	6.92032	6.14878	6.22157	7.38414	7.31076	6.0371	6.76631	1.12079	0.164515	0.119016	0.0993695
sp|Q9UBX3-2|DIC_HUMAN	SLC25A10	DIC_HUMAN Isoform 2 of Mitochondrial dicarboxylate carrier	10	5.93522	5.57671	6.4835	6.35669	6.51913	6.7608	7.08526	6.92338	6.08803	6.82214	1.12058	0.164249	0.0679484	0.0354088
sp|Q9BSF8|BTBDA_HUMAN	BTBD10	BTBDA_HUMAN BTB/POZ domain-containing protein 10	1	5.86627	4.84797	6.13212	7.10157	5.79483	6.15161	8.63211	6.25427	5.98698	6.7082	1.12047	0.164098	0.154755	0.193439
sp|P0CG13|CTF8_HUMAN	CHTF8	CTF8_HUMAN Chromosome transmission fidelity protein 8 homolog	4	5.28917	6.0339	6.08451	6.25489	6.45412	6.26319	7.15504	6.63967	5.91562	6.628	1.12042	0.164046	0.0723841	0.0578613
sp|Q9Y2R5|RT17_HUMAN	MRPS17	RT17_HUMAN 28S ribosomal protein S17, mitochondrial	13	5.98335	5.58756	6.28157	6.24631	6.48177	6.35061	7.03929	7.12405	6.0247	6.74893	1.12021	0.16377	0.0531747	0.0577082
sp|Q9GZT4|SRR_HUMAN	SRR	SRR_HUMAN Serine racemase	3	5.73302	5.78413	6.38133	6.66392	6.21996	6.36776	7.86106	7.06618	6.1406	6.87874	1.12021	0.163765	0.0743312	0.109279
sp|Q53H12|AGK_HUMAN	AGK	AGK_HUMAN Acylglycerol kinase, mitochondrial	14	5.79784	5.82639	6.54136	6.39487	6.56088	6.49174	7.1154	7.34293	6.14012	6.87774	1.12013	0.163668	0.0624763	0.060666
sp|Q9BZK3|NACP1_HUMAN	NACAP1	NACP1_HUMAN Putative nascent polypeptide-associated complex subunit alpha-like protein	1	5.94773	5.77985	6.68142	5.07396	5.79862	6.82203	6.66861	7.01318	5.87074	6.57561	1.12006	0.163582	0.112398	0.0816393
sp|Q9H9V9|JMJD4_HUMAN	JMJD4	JMJD4_HUMAN JmjC domain-containing protein 4	1	5.39248	6.17352	7.07425	6.64732	6.72141	6.5341	8.13673	6.92947	6.32189	7.08043	1.11999	0.16348	0.113984	0.102039
sp|Q9Y5P6-2|GMPPB_HUMAN	GMPPB	GMPPB_HUMAN Isoform 2 of Mannose-1-phosphate guanyltransferase beta	7	5.6746	5.78041	6.33109	6.24026	6.35097	6.70471	6.80277	7.0506	6.00659	6.72726	1.11998	0.163473	0.0544817	0.0431127
sp|P29323|EPHB2_HUMAN	EPHB2	EPHB2_HUMAN Ephrin type-B receptor 2	18	5.94131	5.95481	6.1663	6.20691	6.47122	6.8039	6.97354	6.93216	6.06733	6.79521	1.11997	0.163455	0.0228812	0.0335154
sp|P11802|CDK4_HUMAN	CDK4	CDK4_HUMAN Cyclin-dependent kinase 4	7	5.92538	5.45884	5.83193	5.97637	6.32945	6.49527	6.54082	6.6071	5.79813	6.49316	1.11987	0.163333	0.0403522	0.0182353
sp|Q9NWU5|RM22_HUMAN	MRPL22	RM22_HUMAN 39S ribosomal protein L22, mitochondrial	12	5.15819	5.22664	6.40001	6.61921	6.02926	6.00223	7.04487	7.13215	5.85101	6.55213	1.11983	0.163277	0.130958	0.0946995
sp|Q9UJX2|CDC23_HUMAN	CDC23	CDC23_HUMAN Cell division cycle protein 23 homolog	20	5.51211	5.71665	6.38499	6.30209	6.37094	6.72604	6.92414	6.75872	5.97896	6.69496	1.11975	0.163181	0.072005	0.0347677
sp|Q10713|MPPA_HUMAN	PMPCA	MPPA_HUMAN Mitochondrial-processing peptidase subunit alpha	36	5.51421	5.47832	6.12372	6.54663	5.92191	6.21541	7.2107	7.14313	5.91572	6.62279	1.11952	0.162885	0.0869558	0.0983812
sp|P40938|RFC3_HUMAN	RFC3	RFC3_HUMAN Replication factor C subunit 3	14	5.69497	5.79163	6.21216	6.21681	6.40493	6.53485	7.05951	6.76738	5.97889	6.69167	1.11922	0.162487	0.0459772	0.0429536
sp|P46020|KPB1_HUMAN	PHKA1	KPB1_HUMAN Phosphorylase b kinase regulatory subunit alpha, skeletal muscle isoform	3	5.96866	5.58443	6.03894	5.89626	6.43405	6.8301	6.41067	6.61222	5.87207	6.57176	1.11916	0.16241	0.03413	0.0295702
sp|Q96FW1|OTUB1_HUMAN	OTUB1	OTUB1_HUMAN Ubiquitin thioesterase OTUB1	16	5.83953	5.74415	5.95034	6.39358	6.4784	6.31857	6.96145	7.01755	5.9819	6.69399	1.11904	0.162263	0.047994	0.0520107
sp|Q86XP3|DDX42_HUMAN	DDX42	DDX42_HUMAN ATP-dependent RNA helicase DDX42	34	5.62222	5.56891	6.15375	6.22223	6.36698	6.34908	6.91709	6.73844	5.89178	6.5929	1.119	0.16221	0.0583638	0.0426114
sp|P33176|KINH_HUMAN	KIF5B	KINH_HUMAN Kinesin-1 heavy chain	56	5.62426	5.61017	5.98695	6.35593	6.21529	6.18516	6.91273	7.06508	5.89433	6.59456	1.1188	0.16195	0.060009	0.0697146
sp|P15559|NQO1_HUMAN	NQO1	NQO1_HUMAN NAD(P)H dehydrogenase [quinone] 1	18	5.68876	5.64593	6.09634	6.17376	6.39235	6.24602	6.79623	6.96063	5.9012	6.59881	1.11821	0.161198	0.046166	0.0507894
sp|P49736|MCM2_HUMAN	MCM2	MCM2_HUMAN DNA replication licensing factor MCM2	60	5.65189	5.47553	6.12527	6.33121	6.22453	6.27099	7.00735	6.86816	5.89597	6.59276	1.11818	0.161152	0.0677267	0.0611046
sp|Q6P1K8|T2H2L_HUMAN	GTF2H2C	T2H2L_HUMAN General transcription factor IIH subunit 2-like protein	1	6.53683	5.09369	6.28784	6.15178	5.66786	6.40089	7.91532	6.92818	6.01753	6.72806	1.11808	0.161018	0.105724	0.140499
sp|Q4KMQ2-2|ANO6_HUMAN	ANO6	ANO6_HUMAN Isoform 2 of Anoctamin-6	10	6.01069	5.86758	6.14527	6.62551	6.38581	6.83727	7.11429	7.22151	6.16226	6.88972	1.11805	0.160985	0.0533875	0.054126
sp|Q7L2H7|EIF3M_HUMAN	EIF3M	EIF3M_HUMAN Eukaryotic translation initiation factor 3 subunit M	26	5.78912	5.65786	6.12241	5.96536	6.36653	6.62593	6.68167	6.63513	5.88369	6.57732	1.11789	0.160778	0.0344984	0.0216845
sp|P82914|RT15_HUMAN	MRPS15	RT15_HUMAN 28S ribosomal protein S15, mitochondrial	12	5.66016	5.62554	6.08231	6.41987	6.04957	6.57477	6.91373	7.04114	5.94697	6.6448	1.11734	0.160072	0.0634784	0.066661
sp|Q8IYR2|SMYD4_HUMAN	SMYD4	SMYD4_HUMAN SET and MYND domain-containing protein 4	2	5.24966	4.80904	5.62781	7.6365	5.61599	6.68677	7.50304	6.24498	5.83075	6.51269	1.11696	0.159573	0.214288	0.121772
sp|A7E2V4-4|ZSWM8_HUMAN	ZSWIM8	ZSWM8_HUMAN Isoform 4 of Zinc finger SWIM domain-containing protein 8	2	6.04845	6.42246	6.01069	5.84992	5.62703	6.58977	7.63644	7.32341	6.08288	6.79416	1.11693	0.159541	0.0398166	0.131468
sp|P68104|EF1A1_HUMAN	EEF1A1	EF1A1_HUMAN Elongation factor 1-alpha 1	102	5.82052	5.68482	5.726	6.10973	6.26286	6.38359	6.72837	6.69554	5.83527	6.51759	1.11693	0.15954	0.0328332	0.0353155
sp|Q9HBL8|NMRL1_HUMAN	NMRAL1	NMRL1_HUMAN NmrA-like family domain-containing protein 1	8	5.36791	5.67866	6.18901	6.12472	6.08583	6.00785	6.95113	7.0446	5.84007	6.52235	1.11683	0.159406	0.0664479	0.0845276
sp|Q96BQ5|CC127_HUMAN	CCDC127	CC127_HUMAN Coiled-coil domain-containing protein 127	1	5.77361	6.12402	5.99557	6.02299	7.90464	6.03362	6.75347	6.00472	5.97905	6.67411	1.11625	0.15866	0.0246991	0.133422
sp|Q9NWX6|THG1_HUMAN	THG1L	THG1_HUMAN Probable tRNA(His) guanylyltransferase	12	5.84634	6.00621	5.83425	6.32344	6.27066	6.63927	6.91622	6.96769	6.00256	6.69846	1.11593	0.158252	0.0379543	0.0477115
sp|P21709|EPHA1_HUMAN	EPHA1	EPHA1_HUMAN Ephrin type-A receptor 1	11	5.85096	5.56893	6.31963	6.26294	6.40784	6.33587	7.05752	6.97744	6.00061	6.69467	1.11566	0.157902	0.059259	0.0560647
sp|O75530|EED_HUMAN	EED	EED_HUMAN Polycomb protein EED	15	5.80986	5.60498	6.3112	6.27152	6.35615	6.61194	6.97587	6.8277	5.99939	6.69292	1.1156	0.157819	0.0579619	0.0402949
sp|Q8N2K1|UB2J2_HUMAN	UBE2J2	UB2J2_HUMAN Ubiquitin-conjugating enzyme E2 J2	4	5.54857	5.44319	5.48053	5.90424	5.81707	6.2347	6.06786	6.84103	5.59413	6.24017	1.11548	0.15767	0.0377701	0.069838
sp|Q9NRG4|SMYD2_HUMAN	SMYD2	SMYD2_HUMAN N-lysine methyltransferase SMYD2	4	5.61811	5.39909	6.65776	5.81897	6.45682	6.54785	6.64567	6.5546	5.87348	6.55124	1.11539	0.157551	0.0936838	0.0117759
sp|Q9NTK5|OLA1_HUMAN	OLA1	OLA1_HUMAN Obg-like ATPase 1	48	5.52146	5.46616	6.07204	6.5214	5.86531	6.0748	7.12564	7.23377	5.89527	6.57488	1.11528	0.157408	0.0846529	0.107225
sp|Q9BTU6|P4K2A_HUMAN	PI4K2A	P4K2A_HUMAN Phosphatidylinositol 4-kinase type 2-alpha	16	5.38522	5.50626	6.42197	6.48078	5.98716	6.05121	7.40244	7.09643	5.94856	6.63431	1.11528	0.157407	0.0980401	0.108777
sp|Q13057-2|COASY_HUMAN	COASY	COASY_HUMAN Isoform 2 of Bifunctional coenzyme A synthase	6	5.74576	5.6884	6.34269	6.28146	6.01309	6.62894	7.0426	7.14665	6.01458	6.70782	1.11526	0.157381	0.0573979	0.0766721
sp|Q6YI46|TMM64_HUMAN	TMEM64	TMM64_HUMAN Transmembrane protein 64	2	5.32253	6.23818	7.42525	5.87392	6.40371	7.79181	6.64944	6.88003	6.21497	6.93125	1.11525	0.157368	0.143256	0.0873982
sp|P14324|FPPS_HUMAN	FDPS	FPPS_HUMAN Farnesyl pyrophosphate synthase	14	5.52713	5.50009	6.15015	6.62191	6.19667	6.16527	6.88362	7.29566	5.94982	6.63531	1.11521	0.157317	0.0906532	0.0830525
sp|Q8IYU2|HACE1_HUMAN	HACE1	HACE1_HUMAN E3 ubiquitin-protein ligase HACE1	1	5.70985	6.49639	6.69645	5.55602	5.78588	6.67561	6.7015	8.10974	6.11468	6.81818	1.11505	0.157111	0.0925198	0.140874
sp|P40337|VHL_HUMAN	VHL	VHL_HUMAN Von Hippel-Lindau disease tumor suppressor	3	6.10451	5.31455	6.02675	6.38028	6.18491	6.43875	6.97686	6.96501	5.95652	6.64138	1.11498	0.157013	0.0762303	0.0593886
sp|Q9BYD6|RM01_HUMAN	MRPL1	RM01_HUMAN 39S ribosomal protein L1, mitochondrial	10	5.35471	5.3337	6.19297	6.6914	6.01623	6.255	6.98063	7.03008	5.8932	6.57048	1.11493	0.15695	0.112983	0.0779115
sp|Q9NZ01|TECR_HUMAN	TECR	TECR_HUMAN Very-long-chain enoyl-CoA reductase	9	5.82684	5.30196	6.51055	6.28733	6.4438	6.36355	6.79359	7.06634	5.98167	6.66682	1.11454	0.15645	0.0894631	0.0487891
sp|O15145|ARPC3_HUMAN	ARPC3	ARPC3_HUMAN Actin-related protein 2/3 complex subunit 3	15	5.58517	5.40422	5.93731	6.41439	6.18777	6.02954	6.89702	6.89855	5.83527	6.50322	1.11447	0.156354	0.0762649	0.070759
sp|Q14494|NF2L1_HUMAN	NFE2L1	NF2L1_HUMAN Nuclear factor erythroid 2-related factor 1	1	6.03249	5.59553	6.14679	6.50286	6.25251	6.93654	7.15964	6.70709	6.06942	6.76394	1.11443	0.156307	0.0616324	0.0573331
sp|O75191|XYLB_HUMAN	XYLB	XYLB_HUMAN Xylulose kinase	6	5.96589	5.18438	5.88643	6.37755	5.74935	6.23467	7.20344	6.90471	5.85356	6.52304	1.11437	0.15623	0.0846209	0.100542
sp|Q96KG9|NTKL_HUMAN	SCYL1	NTKL_HUMAN N-terminal kinase-like protein	28	5.5162	5.73246	6.06508	6.38781	6.24593	6.2865	6.91269	6.96453	5.92539	6.60241	1.11426	0.156084	0.0644854	0.0589385
sp|O15431|COPT1_HUMAN	SLC31A1	COPT1_HUMAN High affinity copper uptake protein 1	1	5.40555	5.2613	6.00722	7.04617	5.91315	7.50499	6.52961	6.48036	5.93006	6.60703	1.11416	0.155955	0.13679	0.10001
sp|O96020|CCNE2_HUMAN	CCNE2	CCNE2_HUMAN G1/S-specific cyclin-E2	1	6.11983	5.27832	6.03739	6.99615	5.88998	6.67341	7.94922	6.70318	6.10792	6.80395	1.11395	0.15569	0.115084	0.12512
sp|Q9H3E2|SNX25_HUMAN	SNX25	SNX25_HUMAN Sorting nexin-25	3	5.65053	5.72756	6.42877	6.44626	6.61058	6.48411	7.10375	6.81582	6.06328	6.75357	1.11385	0.155551	0.0714681	0.040057
sp|P0CG29|GST2_HUMAN	GSTT2	GST2_HUMAN Glutathione S-transferase theta-2	7	5.23175	5.52689	5.88218	6.41604	5.67659	6.33708	7.10307	6.55501	5.76421	6.41794	1.11341	0.154986	0.0883824	0.0919311
sp|P52943|CRIP2_HUMAN	CRIP2	CRIP2_HUMAN Cysteine-rich protein 2	15	6.14595	5.92847	5.82134	5.97957	6.12443	6.92496	6.96727	6.56365	5.96883	6.64508	1.1133	0.154837	0.0226576	0.0589177
sp|P13378|HXD8_HUMAN	HOXD8	HXD8_HUMAN Homeobox protein Hox-D8	1	5.481	5.62966	6.14733	5.97316	6.48966	6.97053	5.2704	7.13248	5.80779	6.46577	1.11329	0.154833	0.0527112	0.130282
sp|Q5SGD2|PPM1L_HUMAN	PPM1L	PPM1L_HUMAN Protein phosphatase 1L	3	5.35675	5.86764	5.9047	6.15832	5.9543	6.49609	6.52121	6.95076	5.82185	6.48059	1.11315	0.154647	0.0576968	0.0629912
sp|Q8N0S6-2|CENPL_HUMAN	CENPL	CENPL_HUMAN Isoform 2 of Centromere protein L	1	5.92687	4.93742	6.0706	6.33721	6.64551	6.05176	7.70034	5.50742	5.81802	6.47626	1.11314	0.154631	0.105051	0.14501
sp|Q13547|HDAC1_HUMAN	HDAC1	HDAC1_HUMAN Histone deacetylase 1	18	4.81943	4.72204	5.08057	5.3153	5.43796	5.36382	5.56371	5.82626	4.98433	5.54794	1.11307	0.15455	0.0536835	0.0366019
sp|Q96L92|SNX27_HUMAN	SNX27	SNX27_HUMAN Sorting nexin-27	15	5.27126	5.5076	6.01766	6.27094	6.03759	6.32588	6.68194	6.62971	5.76687	6.41878	1.11304	0.154512	0.0794533	0.0465367
sp|Q5VSL9|STRP1_HUMAN	STRIP1	STRP1_HUMAN Striatin-interacting protein 1	15	5.68153	5.51792	6.41578	6.40374	6.02477	6.3257	7.53436	6.84855	6.00474	6.68335	1.11301	0.154468	0.0786787	0.0989926
sp|O95870|ABHGA_HUMAN	ABHD16A	ABHGA_HUMAN Abhydrolase domain-containing protein 16A	6	5.72607	6.2336	6.18922	6.51026	6.73723	6.79336	6.92884	6.98464	6.16479	6.86102	1.11294	0.154371	0.0527422	0.0167842
sp|P50570-4|DYN2_HUMAN	DNM2	DYN2_HUMAN Isoform 4 of Dynamin-2	28	5.73217	5.60345	6.08978	6.58857	6.28745	6.42503	6.94644	7.06526	6.00349	6.68104	1.11286	0.154272	0.0734552	0.0572253
sp|Q04446|GLGB_HUMAN	GBE1	GLGB_HUMAN 1,4-alpha-glucan-branching enzyme	14	5.86766	5.59303	6.28105	6.33354	6.49574	6.34143	7.04216	6.90931	6.01882	6.69716	1.1127	0.154069	0.0585027	0.0496088
sp|P49841-2|GSK3B_HUMAN	GSK3B	GSK3B_HUMAN Isoform 2 of Glycogen synthase kinase-3 beta	13	5.58907	5.72721	6.10314	6.39704	6.17179	6.35239	7.01061	6.96505	5.95412	6.62496	1.11267	0.154025	0.0615669	0.0642796
sp|Q9NRX2|RM17_HUMAN	MRPL17	RM17_HUMAN 39S ribosomal protein L17, mitochondrial	12	5.26568	5.29723	6.25965	6.51723	5.94531	5.75266	7.20098	7.0688	5.83495	6.49194	1.1126	0.153929	0.111027	0.1153
sp|Q9Y2V7|COG6_HUMAN	COG6	COG6_HUMAN Conserved oligomeric Golgi complex subunit 6	12	5.71619	5.68112	6.31757	6.1488	6.40816	6.37136	6.95244	6.8171	5.96592	6.63727	1.11253	0.153844	0.0530568	0.0439147
sp|Q9Y305-4|ACOT9_HUMAN	ACOT9	ACOT9_HUMAN Isoform 4 of Acyl-coenzyme A thioesterase 9, mitochondrial	16	5.85504	5.57528	6.14674	6.20899	6.25024	6.62499	6.84757	6.73854	5.94651	6.61533	1.11247	0.15377	0.0490443	0.0392736
sp|Q12788|TBL3_HUMAN	TBL3	TBL3_HUMAN Transducin beta-like protein 3	11	6.02687	5.80434	5.85068	6.11293	6.36982	6.70827	6.73593	6.65354	5.94871	6.61689	1.11232	0.153578	0.0244628	0.0254249
sp|Q99543|DNJC2_HUMAN	DNAJC2	DNJC2_HUMAN DnaJ homolog subfamily C member 2	22	5.76731	5.55971	6.27895	6.3511	6.45713	6.28313	7.07965	6.82025	5.98927	6.66004	1.112	0.153151	0.0645664	0.0537871
sp|P56545-2|CTBP2_HUMAN	CTBP2	CTBP2_HUMAN Isoform 2 of C-terminal-binding protein 2	14	5.77853	5.85783	5.84076	6.19954	6.30027	6.28523	6.78453	6.95759	5.91916	6.5819	1.11197	0.153112	0.0320988	0.0518597
sp|Q9Y6X4|F169A_HUMAN	FAM169A	F169A_HUMAN Soluble lamin-associated protein of 75 kDa	3	5.33003	5.38784	6.17103	6.53464	5.92111	6.23637	7.34339	6.54252	5.85588	6.51085	1.11185	0.152958	0.101298	0.09373
sp|Q9BUT9|F195A_HUMAN	FAM195A	F195A_HUMAN Protein FAM195A	1	5.24202	5.49164	7.77708	4.93071	7.3981	7.44614	5.64274	5.57573	5.86036	6.51568	1.11182	0.152925	0.221531	0.160722
sp|Q8NAT1|PMGT2_HUMAN	POMGNT2	PMGT2_HUMAN Protein O-linked-mannose beta-1,4-N-acetylglucosaminyltransferase 2	4	5.94689	5.94991	5.66819	6.32092	6.49774	6.83132	6.52698	6.7006	5.97148	6.63916	1.11181	0.152913	0.0448478	0.0235414
sp|Q9GZT9|EGLN1_HUMAN	EGLN1	EGLN1_HUMAN Egl nine homolog 1	14	6.03111	5.95179	5.77184	6.10819	6.23635	6.59621	6.82238	6.87378	5.96573	6.63218	1.11171	0.152784	0.0241668	0.0437454
sp|O00487|PSDE_HUMAN	PSMD14	PSDE_HUMAN 26S proteasome non-ATPase regulatory subunit 14	21	5.74552	5.83106	6.02213	6.34106	6.22446	6.39331	6.88837	7.10431	5.98494	6.65261	1.11156	0.152584	0.0441231	0.0619872
sp|Q8IZT6|ASPM_HUMAN	ASPM	ASPM_HUMAN Abnormal spindle-like microcephaly-associated protein	1	5.43805	5.69369	6.45932	5.76298	6.5797	6.35252	6.36431	6.66205	5.83851	6.48965	1.11152	0.152539	0.0748181	0.023929
sp|Q6UWW8|EST3_HUMAN	CES3	EST3_HUMAN Carboxylesterase 3	1	3.59237	6.4222	7.59033	5.46998	6.27188	6.58297	6.69143	6.09721	5.76872	6.41087	1.11132	0.152269	0.293006	0.0428162
sp|Q9H8M2|BRD9_HUMAN	BRD9	BRD9_HUMAN Bromodomain-containing protein 9	2	5.57431	5.42256	6.29501	6.21666	5.2809	6.71926	6.59302	7.52784	5.87713	6.53026	1.11113	0.152026	0.0753443	0.142442
sp|Q99873|ANM1_HUMAN	PRMT1	ANM1_HUMAN Protein arginine N-methyltransferase 1	66	5.82761	5.64176	6.28562	6.41285	6.29328	6.33301	7.21317	7.01393	6.04196	6.71335	1.11112	0.152016	0.0606643	0.069935
sp|Q8IYH5|ZZZ3_HUMAN	ZZZ3	ZZZ3_HUMAN ZZ-type zinc finger-containing protein 3	2	5.35444	5.07597	7.37877	6.34544	6.37364	6.80884	7.55657	6.09528	6.03866	6.70858	1.11094	0.151781	0.173286	0.094959
sp|P60842|IF4A1_HUMAN	EIF4A1	IF4A1_HUMAN Eukaryotic initiation factor 4A-I	31	5.98955	5.87984	6.42236	6.29422	6.69623	6.50046	7.10585	7.00959	6.14649	6.82803	1.11088	0.151707	0.0413364	0.0409744
sp|Q14CZ7|FAKD3_HUMAN	FASTKD3	FAKD3_HUMAN FAST kinase domain-containing protein 3	2	5.86827	6.59799	5.54733	7.19278	6.94181	6.2846	7.93336	6.83983	6.30159	6.9999	1.11081	0.151618	0.117286	0.0980087
sp|Q86VZ4|LRP11_HUMAN	LRP11	LRP11_HUMAN Low-density lipoprotein receptor-related protein 11	1	6.73904	6.20792	5.62649	4.28153	7.32893	7.21122	5.63329	5.21408	5.71375	6.34688	1.11081	0.151611	0.185063	0.170278
sp|Q13155|AIMP2_HUMAN	AIMP2	AIMP2_HUMAN Aminoacyl tRNA synthase complex-interacting multifunctional protein 2	14	6.17954	5.76268	6.36009	6.33678	6.78125	6.30692	7.20407	7.07394	6.15977	6.84154	1.11068	0.151445	0.0449052	0.0581544
sp|Q5BJH7|YIF1B_HUMAN	YIF1B	YIF1B_HUMAN Protein YIF1B	4	4.31185	5.50911	7.08565	6.36463	6.16154	5.88005	6.63298	7.1714	5.81781	6.46149	1.11064	0.151391	0.205057	0.0876121
sp|O00116|ADAS_HUMAN	AGPS	ADAS_HUMAN Alkyldihydroxyacetonephosphate synthase, peroxisomal	27	5.65862	5.46847	6.19625	6.42033	6.11016	6.25066	7.01473	6.99447	5.93592	6.59251	1.11061	0.151356	0.0752039	0.0727132
sp|P12429|ANXA3_HUMAN	ANXA3	ANXA3_HUMAN Annexin A3	48	5.44289	5.46309	5.965	6.30348	6.03252	6.00777	6.69055	7.00505	5.79361	6.43397	1.11053	0.151246	0.0719705	0.0769196
sp|Q96LD8|SENP8_HUMAN	SENP8	SENP8_HUMAN Sentrin-specific protease 8	2	4.98272	6.27361	6.26422	6.61154	6.85327	7.11171	6.46537	6.36654	6.03302	6.69922	1.11043	0.151113	0.119111	0.0516545
sp|Q9UMR2|DD19B_HUMAN	DDX19B	DD19B_HUMAN ATP-dependent RNA helicase DDX19B	23	5.83337	5.88566	6.0726	6.48386	6.2931	7.05923	6.84437	6.75931	6.06887	6.739	1.11042	0.151107	0.0486256	0.0479225
sp|P55212|CASP6_HUMAN	CASP6	CASP6_HUMAN Caspase-6	10	5.39018	5.5906	6.26239	6.589	6.00432	6.39382	6.83167	7.23318	5.95804	6.61575	1.11039	0.151066	0.0943604	0.0805026
sp|Q9Y5M8|SRPRB_HUMAN	SRPRB	SRPRB_HUMAN Signal recognition particle receptor subunit beta	15	6.2818	6.23168	6.0597	6.23579	6.71596	6.90951	6.95794	6.9641	6.20224	6.88688	1.11039	0.15106	0.0157534	0.0169207
sp|P40818|UBP8_HUMAN	USP8	UBP8_HUMAN Ubiquitin carboxyl-terminal hydrolase 8	16	5.70969	5.63766	6.12817	6.39244	6.50044	6.25454	6.86614	6.88093	5.96699	6.62551	1.11036	0.151029	0.0597745	0.0458133
sp|Q2TAA5|ALG11_HUMAN	ALG11	ALG11_HUMAN GDP-Man:Man(3)GlcNAc(2)-PP-Dol alpha-1,2-mannosyltransferase	3	5.82978	5.80748	6.69918	6.66555	7.13067	6.68541	7.25058	6.69434	6.2505	6.94025	1.11035	0.151017	0.0798256	0.0422529
sp|Q9BUB7|TMM70_HUMAN	TMEM70	TMM70_HUMAN Transmembrane protein 70, mitochondrial	8	5.49448	5.71593	6.42919	6.41224	6.25528	6.48232	6.88835	7.0759	6.01296	6.67546	1.11018	0.150792	0.0797421	0.0560194
sp|P52824|DGKQ_HUMAN	DGKQ	DGKQ_HUMAN Diacylglycerol kinase theta	1	5.69649	5.56969	6.0197	6.97438	6.34791	6.65804	7.03398	6.89275	6.06506	6.73317	1.11016	0.150763	0.104719	0.0445574
sp|Q53EL6|PDCD4_HUMAN	PDCD4	PDCD4_HUMAN Programmed cell death protein 4	14	5.80546	5.84882	6.20377	6.48863	6.41595	6.50599	7.08079	7.02497	6.08667	6.75692	1.11012	0.150714	0.0528926	0.0509796
sp|Q15345|LRC41_HUMAN	LRRC41	LRC41_HUMAN Leucine-rich repeat-containing protein 41	4	5.97681	5.76903	6.0742	6.16664	6.04106	6.55541	7.04834	6.98295	5.99667	6.65694	1.11011	0.150698	0.0284168	0.0698744
sp|Q9NZJ5|E2AK3_HUMAN	EIF2AK3	E2AK3_HUMAN Eukaryotic translation initiation factor 2-alpha kinase 3	1	6.11443	6.32276	5.48999	5.97145	6.4381	6.38913	7.33962	6.36256	5.97466	6.63235	1.11008	0.150665	0.0592248	0.071249
sp|P82932|RT06_HUMAN	MRPS6	RT06_HUMAN 28S ribosomal protein S6, mitochondrial	5	5.89436	5.82431	6.20153	6.44183	6.73129	6.804	6.79967	6.7075	6.09051	6.76061	1.11002	0.150592	0.0469296	0.00719013
sp|P49327|FAS_HUMAN	FASN	FAS_HUMAN Fatty acid synthase	279	5.83392	5.72788	6.29605	6.38453	6.46839	6.41042	7.05599	6.97146	6.06059	6.72657	1.10989	0.150411	0.0540951	0.0496856
sp|Q9Y3D3|RT16_HUMAN	MRPS16	RT16_HUMAN 28S ribosomal protein S16, mitochondrial	6	5.54243	5.53679	6.10972	6.46604	6.12781	6.10367	7.09706	6.92557	5.91374	6.56353	1.10988	0.150399	0.0770836	0.0795109
sp|Q9H9J4|UBP42_HUMAN	USP42	UBP42_HUMAN Ubiquitin carboxyl-terminal hydrolase 42	2	4.8358	5.31009	7.06144	6.36846	6.78429	6.57142	6.47632	6.33132	5.89395	6.54084	1.10975	0.150241	0.171039	0.0290435
sp|Q96DM3|MIC1_HUMAN	C18orf8	MIC1_HUMAN Uncharacterized protein C18orf8	6	5.57185	5.62186	6.1043	6.73538	6.44136	6.28243	6.9716	6.9697	6.00835	6.66627	1.1095	0.149912	0.0900231	0.0536138
sp|Q9BZZ5|API5_HUMAN	API5	API5_HUMAN Apoptosis inhibitor 5	23	5.80878	5.71236	6.11586	6.31527	6.54467	6.31169	6.80535	6.91326	5.98807	6.64374	1.1095	0.149906	0.0463955	0.0406519
sp|Q8N697|S15A4_HUMAN	SLC15A4	S15A4_HUMAN Solute carrier family 15 member 4	2	5.92008	5.84443	5.89347	6.30276	6.55115	6.52575	6.42606	7.08102	5.99018	6.646	1.10948	0.149885	0.0351785	0.0443874
sp|Q9BV79|MECR_HUMAN	MECR	MECR_HUMAN Trans-2-enoyl-CoA reductase, mitochondrial	5	5.68656	5.60542	6.42916	6.78044	5.9766	6.45322	7.63138	7.12283	6.12539	6.79601	1.10948	0.149885	0.0935127	0.107244
sp|Q14738|2A5D_HUMAN	PPP2R5D	2A5D_HUMAN Serine/threonine-protein phosphatase 2A 56 kDa regulatory subunit delta isoform	16	6.08822	5.70954	6.347	6.19168	6.5698	6.63833	7.07386	6.71756	6.08411	6.74989	1.10943	0.149817	0.0446108	0.0332245
sp|Q99594|TEAD3_HUMAN	TEAD3	TEAD3_HUMAN Transcriptional enhancer factor TEF-5	2	6.14185	6.24103	6.41149	5.67811	6.31771	7.25384	6.4701	7.1083	6.11812	6.78749	1.10941	0.149789	0.0512845	0.0681461
sp|Q969M3-3|YIPF5_HUMAN	YIPF5	YIPF5_HUMAN Isoform 3 of Protein YIPF5	1	5.73386	6.15836	6.2801	5.79508	6.38349	6.66266	7.05974	6.47652	5.99185	6.6456	1.10911	0.149398	0.0447916	0.0450667
sp|Q4G176|ACSF3_HUMAN	ACSF3	ACSF3_HUMAN Acyl-CoA synthetase family member 3, mitochondrial	11	5.60492	5.74017	6.19792	6.14544	6.36951	6.37177	6.75464	6.77653	5.92211	6.56811	1.10908	0.149367	0.049678	0.0347434
sp|Q12965|MYO1E_HUMAN	MYO1E	MYO1E_HUMAN Unconventional myosin-Ie	34	5.55288	5.62832	6.07303	6.42707	6.07681	6.24241	6.94923	6.9947	5.92033	6.56579	1.10902	0.149292	0.0689841	0.0722266
sp|P60709|ACTB_HUMAN	ACTB	ACTB_HUMAN Actin, cytoplasmic 1	75	5.36055	5.51993	5.919	6.29985	6.05419	6.27565	6.58216	6.70167	5.77483	6.40342	1.10885	0.149063	0.0729923	0.0459023
sp|Q8N5M9|JAGN1_HUMAN	JAGN1	JAGN1_HUMAN Protein jagunal homolog 1	2	5.69619	5.3128	6.70287	6.42827	7.11185	6.76411	6.5884	6.30188	6.03503	6.69156	1.10879	0.148981	0.106404	0.0506341
sp|O00425|IF2B3_HUMAN	IGF2BP3	IF2B3_HUMAN Insulin-like growth factor 2 mRNA-binding protein 3	20	5.8818	5.86644	6.13722	6.25294	6.49888	6.57656	6.81895	6.86698	6.0346	6.69034	1.10866	0.148822	0.0317066	0.0269245
sp|P17028|ZNF24_HUMAN	ZNF24	ZNF24_HUMAN Zinc finger protein 24	1	4.07844	6.35632	7.83419	6.50786	8.5261	6.37002	5.53822	7.03205	6.1942	6.8666	1.10855	0.148677	0.251674	0.184068
sp|Q9NXX6|NSE4A_HUMAN	NSMCE4A	NSE4A_HUMAN Non-structural maintenance of chromosomes element 4 homolog A	3	5.80241	6.16218	6.05429	5.9425	6.72941	6.76159	6.78735	6.28313	5.99035	6.64037	1.10851	0.148625	0.0257219	0.0360427
sp|Q96I99|SUCB2_HUMAN	SUCLG2	SUCB2_HUMAN Succinyl-CoA ligase [GDP-forming] subunit beta, mitochondrial	36	5.57052	5.8086	5.99504	6.36055	6.12371	6.32976	6.80863	7.04675	5.93368	6.57721	1.10845	0.14855	0.0561917	0.0645599
sp|P49411|EFTU_HUMAN	TUFM	EFTU_HUMAN Elongation factor Tu, mitochondrial	68	5.90871	5.7292	6.10546	6.25996	6.45422	6.28399	6.88215	6.98453	6.00083	6.65122	1.10838	0.148457	0.0385285	0.0504725
sp|Q9Y5N5|HEMK2_HUMAN	N6AMT1	HEMK2_HUMAN HemK methyltransferase family member 2	2	5.66737	5.35161	6.08613	5.98327	5.72657	6.2665	6.784	6.81215	5.7721	6.3973	1.10832	0.148369	0.0575456	0.0801452
sp|Q96BI3|APH1A_HUMAN	APH1A	APH1A_HUMAN Gamma-secretase subunit APH-1A	1	5.38461	6.14808	6.63293	6.25536	6.58958	6.73098	6.27396	7.468	6.10525	6.76563	1.10817	0.148175	0.0857448	0.0747484
sp|P84085|ARF5_HUMAN	ARF5	ARF5_HUMAN ADP-ribosylation factor 5	4	6.07303	5.91056	5.9335	5.64959	6.30309	6.49766	6.44905	6.86568	5.89167	6.52887	1.10815	0.148157	0.0299806	0.0366493
sp|Q8TBC4|UBA3_HUMAN	UBA3	UBA3_HUMAN NEDD8-activating enzyme E1 catalytic subunit	17	5.54862	5.68777	5.96265	6.48968	6.07779	6.31524	6.85672	6.99258	5.92218	6.56058	1.1078	0.147696	0.0701782	0.0663008
sp|P53350|PLK1_HUMAN	PLK1	PLK1_HUMAN Serine/threonine-protein kinase PLK1	8	6.23616	6.49572	6.31511	6.66273	6.88117	7.41174	7.04247	7.14565	6.42743	7.12026	1.10779	0.147687	0.0296874	0.0312806
sp|Q15046|SYK_HUMAN	KARS	SYK_HUMAN Lysine--tRNA ligase	41	5.81833	5.63488	6.20137	6.16837	6.32581	6.38358	6.92224	6.75866	5.95574	6.59757	1.10777	0.147655	0.0462251	0.0438427
sp|Q00535|CDK5_HUMAN	CDK5	CDK5_HUMAN Cyclin-dependent kinase 5	6	5.88014	6.41462	5.65294	6.73234	6.67533	6.68162	7.19296	6.78423	6.17001	6.83354	1.10754	0.147359	0.0798088	0.0358177
sp|O75534-3|CSDE1_HUMAN	CSDE1	CSDE1_HUMAN Isoform 3 of Cold shock domain-containing protein E1	64	5.88355	5.66111	6.11206	6.24842	6.36168	6.38407	6.86877	6.86107	5.97628	6.6189	1.10753	0.147342	0.04325	0.0429447
sp|O00541|PESC_HUMAN	PES1	PESC_HUMAN Pescadillo homolog	23	5.5305	5.66328	6.30832	6.67345	5.92389	6.40914	7.20592	7.23147	6.04389	6.69261	1.10733	0.147091	0.0893415	0.0954855
sp|O75438|NDUB1_HUMAN	NDUFB1	NDUB1_HUMAN NADH dehydrogenase [ubiquinone] 1 beta subcomplex subunit 1	1	6.89792	7.70353	5.46725	7.09599	9.15993	8.87363	5.6013	6.44383	6.79117	7.51967	1.10727	0.147009	0.139421	0.234913
sp|P18440|ARY1_HUMAN	NAT1	ARY1_HUMAN Arylamine N-acetyltransferase 1	4	5.32263	5.47255	6.37153	6.34616	6.04854	6.20999	6.96727	6.80629	5.87822	6.50802	1.10714	0.14684	0.0950019	0.0687069
sp|Q12816|TROP_HUMAN	TRO	TROP_HUMAN Trophinin	3	5.56769	5.91667	6.27373	6.24468	5.89064	6.32337	7.03375	7.3234	6.00069	6.64279	1.107	0.14666	0.0551559	0.0984791
sp|P82675|RT05_HUMAN	MRPS5	RT05_HUMAN 28S ribosomal protein S5, mitochondrial	16	5.77035	5.65373	6.03895	6.22086	6.20923	6.31999	6.92086	6.7667	5.92097	6.55419	1.10695	0.146584	0.0433842	0.0523705
sp|O43865|SAHH2_HUMAN	AHCYL1	SAHH2_HUMAN Putative adenosylhomocysteinase 2	12	5.50663	5.70316	6.05986	6.47188	6.0835	6.18305	6.97538	7.03524	5.93538	6.56929	1.1068	0.146397	0.071552	0.0769791
sp|Q8IUX1|T126B_HUMAN	TMEM126B	T126B_HUMAN Complex I assembly factor TMEM126B, mitochondrial	2	5.5954	5.6869	6.52821	6.5338	6.56882	6.9527	6.87112	6.54906	6.08608	6.73543	1.10669	0.146256	0.084639	0.0306808
sp|Q9Y399|RT02_HUMAN	MRPS2	RT02_HUMAN 28S ribosomal protein S2, mitochondrial	10	5.65881	5.70766	6.07503	6.39763	6.50706	6.52892	6.73128	6.61226	5.95978	6.59488	1.10656	0.146087	0.0580554	0.0154065
sp|Q8WWH5|TRUB1_HUMAN	TRUB1	TRUB1_HUMAN Probable tRNA pseudouridine synthase 1	18	5.5681	5.77066	6.17276	6.29471	6.3912	6.17475	6.97216	6.79755	5.95156	6.58392	1.10625	0.145678	0.0570989	0.0555251
sp|Q9H3C7|GGNB2_HUMAN	GGNBP2	GGNB2_HUMAN Gametogenetin-binding protein 2	2	4.96412	4.45816	10.7195	5.53598	6.88909	10.0819	4.87793	6.55538	6.41944	7.10107	1.10618	0.14559	0.451803	0.30606
sp|Q07666|KHDR1_HUMAN	KHDRBS1	KHDR1_HUMAN KH domain-containing, RNA-binding, signal transduction-associated protein 1	18	5.99685	5.99605	6.11789	6.35927	6.70514	6.79583	6.76899	6.79358	6.11752	6.76588	1.10599	0.145333	0.0279583	0.0062493
sp|Q13557-12|KCC2D_HUMAN	CAMK2D	KCC2D_HUMAN Isoform Delta 12 of Calcium/calmodulin-dependent protein kinase type II subunit delta	21	5.84492	5.92652	6.08823	6.08042	6.22414	6.58174	6.91175	6.75811	5.98502	6.61894	1.10592	0.145242	0.0199579	0.0446784
sp|Q9Y4U1|MMAC_HUMAN	MMACHC	MMAC_HUMAN Methylmalonic aciduria and homocystinuria type C protein	6	5.53344	5.43465	6.25063	6.82822	6.34161	6.31483	6.82197	7.11518	6.01173	6.6484	1.1059	0.145225	0.108887	0.058474
sp|Q52LR7|EPC2_HUMAN	EPC2	EPC2_HUMAN Enhancer of polycomb homolog 2	1	5.57633	6.58209	6.28686	6.41539	6.52097	6.59605	7.25237	7.1185	6.21517	6.87197	1.10568	0.144931	0.0712305	0.0534547
sp|Q9BUT1|BDH2_HUMAN	BDH2	BDH2_HUMAN 3-hydroxybutyrate dehydrogenase type 2	3	5.51777	6.02771	6.16843	6.69856	6.24968	6.38696	7.04048	7.31157	6.10312	6.74717	1.10553	0.144737	0.0795498	0.0756611
sp|Q9BY32|ITPA_HUMAN	ITPA	ITPA_HUMAN Inosine triphosphate pyrophosphatase	5	5.60696	6.52838	6.40421	6.23562	7.11723	6.42036	7.05648	6.79521	6.19379	6.84732	1.10551	0.144716	0.066067	0.0463064
sp|Q05513|KPCZ_HUMAN	PRKCZ	KPCZ_HUMAN Protein kinase C zeta type	2	5.3201	5.50403	6.29912	5.93273	6.18521	6.60122	6.4118	6.29002	5.76399	6.37206	1.10549	0.144691	0.0762475	0.0280349
sp|Q86WK9|MPRA_HUMAN	PAQR7	MPRA_HUMAN Membrane progestin receptor alpha	1	6.59266	7.82382	6.03327	5.89499	7.26489	5.87931	9.15354	6.82388	6.58619	7.28041	1.10541	0.144576	0.133384	0.189004
sp|Q9UGV2|NDRG3_HUMAN	NDRG3	NDRG3_HUMAN Protein NDRG3	8	6.24552	5.71634	6.18707	6.06668	6.52143	6.39082	7.20237	6.65117	6.0539	6.69145	1.10531	0.144453	0.0391548	0.0533238
sp|Q9HCL2|GPAT1_HUMAN	GPAM	GPAT1_HUMAN Glycerol-3-phosphate acyltransferase 1, mitochondrial	1	5.81244	5.30051	5.79156	6.32957	6.01898	5.74891	6.78414	7.12846	5.80852	6.42012	1.10529	0.14443	0.0723534	0.100369
sp|Q9BUF5|TBB6_HUMAN	TUBB6	TBB6_HUMAN Tubulin beta-6 chain	34	5.29659	5.60201	6.12314	6.22983	6.29665	6.47535	6.51848	6.40863	5.81289	6.42478	1.10526	0.14439	0.0757153	0.015041
sp|Q9NUX5|POTE1_HUMAN	POT1	POTE1_HUMAN Protection of telomeres protein 1	2	5.3528	5.71877	6.14658	6.52623	6.07807	6.11669	6.74831	7.30036	5.93609	6.56086	1.10525	0.14437	0.0859	0.0885419
sp|Q14568|HS902_HUMAN	HSP90AA2	HS902_HUMAN Putative heat shock protein HSP 90-alpha A2	1	6.33686	5.59066	5.49188	5.66253	6.61963	5.80043	6.00661	7.08308	5.77048	6.37744	1.10518	0.144285	0.0665474	0.0917459
sp|O75439|MPPB_HUMAN	PMPCB	MPPB_HUMAN Mitochondrial-processing peptidase subunit beta	38	5.81248	5.82982	6.35583	6.40066	6.27247	6.36237	7.24445	7.08502	6.0997	6.74108	1.10515	0.144242	0.0528284	0.0734113
sp|Q96CN5|LRC45_HUMAN	LRRC45	LRC45_HUMAN Leucine-rich repeat-containing protein 45	2	5.61867	6.02813	5.62561	5.8061	6.38658	5.77544	6.85125	6.48897	5.76963	6.37556	1.10502	0.144074	0.0334415	0.0701104
sp|Q9BSK2|S2533_HUMAN	SLC25A33	S2533_HUMAN Solute carrier family 25 member 33	3	5.7801	6.01659	5.98061	6.95508	6.3158	6.738	7.22637	7.04726	6.18309	6.83186	1.10493	0.143949	0.08492	0.0583759
sp|Q8NCN5|PDPR_HUMAN	PDPR	PDPR_HUMAN Pyruvate dehydrogenase phosphatase regulatory subunit, mitochondrial	27	5.56897	5.73606	5.9208	6.34108	6.1719	6.27289	6.7467	6.8469	5.89173	6.5096	1.10487	0.143878	0.0563924	0.0517206
sp|Q9UQ80|PA2G4_HUMAN	PA2G4	PA2G4_HUMAN Proliferation-associated protein 2G4	73	5.97276	5.87332	5.98318	6.00802	6.50003	6.57307	6.7387	6.51936	5.95932	6.58279	1.10462	0.143551	0.00993577	0.0164726
sp|Q9Y5J1|UTP18_HUMAN	UTP18	UTP18_HUMAN U3 small nucleolar RNA-associated protein 18 homolog	4	5.53084	5.58371	6.32863	5.91154	6.38862	6.24396	6.34631	6.81668	5.83868	6.44889	1.10451	0.143409	0.0629397	0.0391696
sp|Q8NBJ5|GT251_HUMAN	COLGALT1	GT251_HUMAN Procollagen galactosyltransferase 1	33	5.45007	5.59029	6.14712	6.44592	6.22493	6.27573	6.86313	6.736	5.90835	6.52495	1.10436	0.143211	0.0792162	0.0493473
sp|O60841|IF2P_HUMAN	EIF5B	IF2P_HUMAN Eukaryotic translation initiation factor 5B	45	6.05184	6.00752	6.0968	5.96564	6.77826	6.76876	6.61826	6.4736	6.03045	6.65972	1.10435	0.143196	0.00937363	0.0216387
sp|Q9Y2K7|KDM2A_HUMAN	KDM2A	KDM2A_HUMAN Lysine-specific demethylase 2A	1	5.90379	6.00213	6.80093	6.297	7.08306	6.77907	7.38967	6.36047	6.25096	6.90307	1.10432	0.143159	0.064457	0.0636391
sp|P50749|RASF2_HUMAN	RASSF2	RASF2_HUMAN Ras association domain-containing protein 2	2	5.12952	5.266	6.56243	6.92028	6.94256	6.14191	7.70542	5.57589	5.96956	6.59145	1.10418	0.142971	0.15157	0.141172
sp|Q92597|NDRG1_HUMAN	NDRG1	NDRG1_HUMAN Protein NDRG1	8	5.01143	5.58932	6.74104	6.52094	6.14285	6.22888	7.19844	6.77824	5.96568	6.5871	1.10417	0.142957	0.13555	0.0751916
sp|O75794|CD123_HUMAN	CDC123	CD123_HUMAN Cell division cycle protein 123 homolog	12	5.6681	5.78757	6.11892	6.25002	6.53914	6.24714	6.72052	6.79935	5.95615	6.57654	1.10416	0.142948	0.0459024	0.0372746
sp|P60228|EIF3E_HUMAN	EIF3E	EIF3E_HUMAN Eukaryotic translation initiation factor 3 subunit E	44	5.81707	5.75557	6.21794	6.31645	6.43016	6.42631	6.93928	6.8214	6.02676	6.65429	1.10412	0.142902	0.0467336	0.0398881
sp|Q2TAY7|SMU1_HUMAN	SMU1	SMU1_HUMAN WD40 repeat-containing protein SMU1	13	5.36179	5.52443	6.19944	6.5302	5.92094	6.41427	6.80508	6.93221	5.90397	6.51813	1.10403	0.142773	0.0936684	0.0698138
sp|Q9Y2K1|ZBTB1_HUMAN	ZBTB1	ZBTB1_HUMAN Zinc finger and BTB domain-containing protein 1	2	6.00825	5.88988	5.99375	5.80617	6.71833	6.12044	6.97503	6.34917	5.92451	6.54074	1.10401	0.142758	0.0160159	0.0581173
sp|Q96GC5|RM48_HUMAN	MRPL48	RM48_HUMAN 39S ribosomal protein L48, mitochondrial	10	5.28896	5.36204	6.26101	6.94016	5.78861	6.28426	7.15656	7.1036	5.96304	6.58326	1.10401	0.142753	0.132016	0.100771
sp|O43861|ATP9B_HUMAN	ATP9B	ATP9B_HUMAN Probable phospholipid-transporting ATPase IIB	1	5.88157	5.55277	6.47501	7.01145	6.2782	6.42537	7.60396	7.20387	6.2302	6.87785	1.10395	0.142679	0.103638	0.0918727
sp|Q9NX47|MARH5_HUMAN	MTARC5	MARH5_HUMAN E3 ubiquitin-protein ligase MARCH5	8	5.55608	5.50977	6.39794	6.51109	6.45755	6.45026	6.52926	7.0295	5.99372	6.61664	1.10393	0.142648	0.0891627	0.0419453
sp|Q14691|PSF1_HUMAN	GINS1	PSF1_HUMAN DNA replication complex GINS protein PSF1	4	5.81535	5.44542	6.19509	6.20077	6.19462	6.15051	6.85555	6.91202	5.91416	6.52817	1.10382	0.142507	0.0610075	0.0630595
sp|Q9HB96|FANCE_HUMAN	FANCE	FANCE_HUMAN Fanconi anemia group E protein	2	5.53362	6.08156	6.40974	6.47388	6.44778	6.52033	7.17492	6.8991	6.1247	6.76053	1.10381	0.142498	0.0701892	0.050265
sp|Q6ZT21|TMPPE_HUMAN	TMPPE	TMPPE_HUMAN Transmembrane protein with metallophosphoesterase domain	1	6.40499	5.17145	5.75033	6.84907	5.83556	6.12273	7.59022	7.13476	6.04396	6.67082	1.10372	0.142369	0.12181	0.124178
sp|P09669|COX6C_HUMAN	COX6C	COX6C_HUMAN Cytochrome c oxidase subunit 6C	7	5.98711	5.87698	6.20216	6.21733	6.95038	6.36573	6.66388	6.8167	6.0709	6.69917	1.10349	0.142074	0.0274474	0.0375014
sp|Q9NW15|ANO10_HUMAN	ANO10	ANO10_HUMAN Anoctamin-10	1	5.74652	5.13108	7.34823	6.31177	6.72076	6.13431	7.15	7.07049	6.1344	6.76889	1.10343	0.141997	0.153556	0.0683005
sp|Q8TF05|PP4R1_HUMAN	PPP4R1	PP4R1_HUMAN Serine/threonine-protein phosphatase 4 regulatory subunit 1	16	5.75696	5.71189	6.27479	6.64609	5.9841	6.81361	7.15043	6.95665	6.09743	6.7262	1.10312	0.141589	0.0731638	0.0763618
sp|P06730-2|IF4E_HUMAN	EIF4E	IF4E_HUMAN Isoform 2 of Eukaryotic translation initiation factor 4E	9	5.60902	5.69814	6.11854	6.43157	6.09629	6.36942	6.8483	7.00153	5.96432	6.57888	1.10304	0.141486	0.0641517	0.0637674
sp|Q9Y291|RT33_HUMAN	MRPS33	RT33_HUMAN 28S ribosomal protein S33, mitochondrial	5	5.3181	5.34319	6.38903	6.42758	6.43672	5.92936	6.57211	6.95468	5.86947	6.47322	1.10286	0.141252	0.106052	0.0654624
sp|O43148-2|MCES_HUMAN	RNMT	MCES_HUMAN Isoform 2 of mRNA cap guanine-N7 methyltransferase	16	5.74948	5.84815	5.91674	6.21961	6.14998	6.67413	6.70871	6.63503	5.93349	6.54196	1.10255	0.140841	0.0341656	0.0402095
sp|Q96PV6-2|LENG8_HUMAN	LENG8	LENG8_HUMAN Isoform 2 of Leukocyte receptor cluster member 8	5	6.04886	5.90444	6.2258	6.48698	7.30395	6.5652	6.35997	6.96506	6.16652	6.79855	1.10249	0.140769	0.0406752	0.0618222
sp|O75718|CRTAP_HUMAN	CRTAP	CRTAP_HUMAN Cartilage-associated protein	7	5.42048	5.56117	5.97531	6.22283	5.8322	6.68915	6.66114	6.37261	5.79495	6.38878	1.10247	0.140744	0.0638325	0.0622465
sp|Q96H79|ZCCHL_HUMAN	ZC3HAV1L	ZCCHL_HUMAN Zinc finger CCCH-type antiviral protein 1-like	5	5.32862	5.96925	6.0337	6.19729	5.86472	6.58154	6.92169	6.56888	5.88221	6.48421	1.10234	0.140571	0.0648295	0.0684967
sp|Q9P0T7|TMEM9_HUMAN	TMEM9	TMEM9_HUMAN Transmembrane protein 9	4	6.18621	6.21469	5.34322	5.97436	6.12518	6.78371	6.70903	6.52759	5.92962	6.53638	1.10233	0.140552	0.0683633	0.0450514
sp|Q9Y3C4-3|TPRKB_HUMAN	TPRKB	TPRKB_HUMAN Isoform 3 of EKC/KEOPS complex subunit TPRKB	3	6.27176	5.90686	5.86379	6.45577	6.57519	6.49537	6.92104	7.01282	6.12454	6.7511	1.1023	0.140521	0.0468279	0.0376401
sp|P45954|ACDSB_HUMAN	ACADSB	ACDSB_HUMAN Short/branched chain specific acyl-CoA dehydrogenase, mitochondrial	14	6.09095	5.8819	6.17204	6.37232	6.69891	6.79476	7.02242	6.50921	6.1293	6.75632	1.1023	0.140516	0.033111	0.0315884
sp|Q9NSD9|SYFB_HUMAN	FARSB	SYFB_HUMAN Phenylalanine--tRNA ligase beta subunit	36	5.77482	5.69814	6.07591	6.45244	6.314	6.35026	6.8016	6.9888	6.00033	6.61367	1.10222	0.140409	0.0571103	0.0505437
sp|Q08345-5|DDR1_HUMAN	DDR1	DDR1_HUMAN Isoform 4 of Epithelial discoidin domain-containing receptor 1	16	6.14824	6.14422	6.04553	6.03642	6.90623	6.87972	6.50005	6.57955	6.0936	6.71639	1.1022	0.14039	0.00999488	0.0307838
sp|O15160|RPAC1_HUMAN	POLR1C	RPAC1_HUMAN DNA-directed RNA polymerases I and III subunit RPAC1	13	5.73281	5.58619	6.32585	6.05755	6.1105	6.48523	6.90874	6.61799	5.9256	6.53061	1.1021	0.140258	0.0559693	0.0507218
sp|P03915|NU5M_HUMAN	MT-ND5	NU5M_HUMAN NADH-ubiquinone oxidoreductase chain 5	5	5.56767	5.65021	6.5171	6.02769	6.57233	6.33908	6.88221	6.39481	5.94067	6.54711	1.10208	0.140233	0.072944	0.0373509
sp|O43933|PEX1_HUMAN	PEX1	PEX1_HUMAN Peroxisome biogenesis factor 1	6	5.71	6.07793	6.2609	6.4427	6.84161	6.48954	6.67787	6.97971	6.12288	6.74718	1.10196	0.140074	0.0511126	0.0313432
sp|O43414|ERI3_HUMAN	ERI3	ERI3_HUMAN ERI1 exoribonuclease 3	14	5.78596	5.61216	5.96083	6.45538	6.14397	6.19459	6.98547	6.91456	5.95358	6.55965	1.1018	0.13986	0.0610652	0.0689303
sp|Q7Z4Q2|HEAT3_HUMAN	HEATR3	HEAT3_HUMAN HEAT repeat-containing protein 3	8	5.76011	5.83747	6.35087	6.4161	6.16122	6.68512	7.01243	6.9833	6.09114	6.71052	1.10169	0.139712	0.0558339	0.058854
sp|Q9BXP5|SRRT_HUMAN	SRRT	SRRT_HUMAN Serrate RNA effector molecule homolog	22	5.94547	5.81176	6.35982	6.33521	6.37213	6.43269	7.20226	6.92918	6.11306	6.73406	1.10159	0.139582	0.0452066	0.0593438
sp|Q96AY2-2|EME1_HUMAN	EME1	EME1_HUMAN Isoform 2 of Crossover junction endonuclease EME1	4	5.86127	6.45671	6.18218	6.07983	6.38352	6.95482	6.95041	6.78608	6.145	6.76871	1.1015	0.139468	0.0402247	0.0396723
sp|O95471|CLD7_HUMAN	CLDN7	CLD7_HUMAN Claudin-7	4	6.31319	6.26549	5.4094	6.09403	6.18419	6.81072	7.15465	6.3714	6.02053	6.63024	1.10127	0.139171	0.0694533	0.0659464
sp|Q9NSE4|SYIM_HUMAN	IARS2	SYIM_HUMAN Isoleucine--tRNA ligase, mitochondrial	43	5.82627	5.65796	6.00386	6.27759	6.22217	6.39859	6.79116	6.75873	5.94142	6.54266	1.1012	0.13907	0.0445855	0.0424955
sp|P40425|PBX2_HUMAN	PBX2	PBX2_HUMAN Pre-B-cell leukemia transcription factor 2	3	5.22437	4.95582	6.13443	7.05845	5.40414	5.57444	7.03036	7.72686	5.84327	6.43395	1.10109	0.138929	0.163315	0.175537
sp|Q96AP4|ZUFSP_HUMAN	ZUFSP	ZUFSP_HUMAN Zinc finger with UFM1-specific peptidase domain protein	1	5.8635	5.65471	5.83551	6.98035	5.88478	6.84443	6.53016	7.53452	6.08352	6.69847	1.10109	0.138926	0.0994502	0.102372
sp|Q5TA45-5|INT11_HUMAN	CPSF3L	INT11_HUMAN Isoform 5 of Integrator complex subunit 11	11	5.67928	5.57316	6.49807	6.37882	6.40305	6.76937	6.57725	6.81878	6.03233	6.64211	1.10109	0.138926	0.0784846	0.0286666
sp|Q8TET4|GANC_HUMAN	GANC	GANC_HUMAN Neutral alpha-glucosidase C	2	5.97494	4.62964	6.92838	6.10489	6.38605	7.03758	5.75492	6.84687	5.90946	6.50636	1.10101	0.138823	0.161089	0.0877224
sp|P05413|FABPH_HUMAN	FABP3	FABPH_HUMAN Fatty acid-binding protein, heart	1	3.68712	3.5208	3.56452	3.21653	4.21947	3.0044	4.33784	3.83862	3.49724	3.85008	1.10089	0.138672	0.0571722	0.156537
sp|Q9Y4P1-2|ATG4B_HUMAN	ATG4B	ATG4B_HUMAN Isoform 2 of Cysteine protease ATG4B	6	5.60204	5.87258	6.18393	6.91495	6.58095	6.38649	6.80024	7.28503	6.14337	6.76318	1.10089	0.13867	0.0922409	0.0571896
sp|Q9HA77|SYCM_HUMAN	CARS2	SYCM_HUMAN Probable cysteine--tRNA ligase, mitochondrial	12	5.71273	5.96506	5.94928	6.13425	6.06414	6.67118	6.86182	6.55993	5.94033	6.53927	1.10083	0.138586	0.0291734	0.0520546
sp|O15550|KDM6A_HUMAN	KDM6A	KDM6A_HUMAN Lysine-specific demethylase 6A	1	5.50935	6.22244	6.64152	6.40502	6.83582	6.26802	7.11521	7.05652	6.19458	6.81889	1.10078	0.13853	0.0787744	0.0566726
sp|P26599-3|PTBP1_HUMAN	PTBP1	PTBP1_HUMAN Isoform 3 of Polypyrimidine tract-binding protein 1	21	5.80491	5.75081	5.8218	5.96446	6.44657	6.46761	6.30415	6.4753	5.83549	6.42341	1.10075	0.138484	0.0156204	0.0125209
sp|O75808|CAN15_HUMAN	CAPN15	CAN15_HUMAN Calpain-15	4	5.35976	6.05381	6.45866	6.35721	6.87954	6.07214	6.864	6.85405	6.05736	6.66743	1.10072	0.138442	0.0818596	0.0595432
sp|P12956|XRCC6_HUMAN	XRCC6	XRCC6_HUMAN X-ray repair cross-complementing protein 6	87	5.78774	5.59309	6.16155	6.24468	6.37874	6.29038	6.8642	6.64459	5.94677	6.54448	1.10051	0.138173	0.0518537	0.0398728
sp|P16885|PLCG2_HUMAN	PLCG2	PLCG2_HUMAN 1-phosphatidylinositol 4,5-bisphosphate phosphodiesterase gamma-2	26	5.5696	5.57463	6.07673	6.52642	6.22371	6.02444	6.91507	6.96784	5.93684	6.53276	1.10038	0.137997	0.0773867	0.0733777
tr|C9JEA3|C9JEA3_HUMAN	NEU4	C9JEA3_HUMAN Sialidase-4 (Fragment)	1	6.15324	5.8224	5.88585	6.69824	6.84524	6.78762	6.76046	6.62971	6.13993	6.75576	1.1003	0.137895	0.0649617	0.0134942
sp|P17812|PYRG1_HUMAN	CTPS1	PYRG1_HUMAN CTP synthase 1	23	5.51412	5.37152	5.98756	6.19762	5.84814	6.21862	6.81478	6.50025	5.76771	6.34545	1.10017	0.137725	0.0674793	0.0648267
sp|Q9H8T0-2|AKTIP_HUMAN	AKTIP	AKTIP_HUMAN Isoform 2 of AKT-interacting protein	3	5.49573	5.55557	6.07308	6.7181	6.52331	6.47747	6.43738	6.78548	5.96062	6.55591	1.09987	0.137334	0.09523	0.0239512
sp|O75436|VP26A_HUMAN	VPS26A	VP26A_HUMAN Vacuolar protein sorting-associated protein 26A	19	5.8758	5.67676	6.2451	6.37919	6.40359	6.56848	6.93823	6.68068	6.04421	6.64774	1.09985	0.137311	0.0536919	0.0337887
sp|P62910|RL32_HUMAN	RPL32	RL32_HUMAN 60S ribosomal protein L32	23	6.50524	6.56009	5.89558	5.40822	6.85735	7.49752	6.42908	6.01829	6.09228	6.70056	1.09984	0.137299	0.0897049	0.0943461
sp|Q9BY41|HDAC8_HUMAN	HDAC8	HDAC8_HUMAN Histone deacetylase 8	8	5.26653	5.47072	5.87313	6.065	5.9555	6.404	6.08454	6.49511	5.66885	6.23479	1.09983	0.137286	0.0643956	0.0410984
sp|O60294|LCMT2_HUMAN	LCMT2	LCMT2_HUMAN Leucine carboxyl methyltransferase 2	2	5.71592	5.56701	5.78062	7.07597	5.76049	6.54032	7.1884	7.05348	6.03488	6.63567	1.09955	0.136918	0.115959	0.0974754
sp|Q969G6|RIFK_HUMAN	RFK	RIFK_HUMAN Riboflavin kinase	7	5.50944	5.87683	6.15185	6.08323	6.20651	6.31088	6.69466	6.7581	5.90534	6.49254	1.09944	0.136763	0.04888	0.0422922
sp|O00519|FAAH1_HUMAN	FAAH	FAAH1_HUMAN Fatty-acid amide hydrolase 1	4	5.86077	6.65229	6.10338	6.19958	7.31696	6.59049	6.40714	6.96691	6.204	6.82038	1.09935	0.136651	0.0533714	0.059357
sp|Q5VZE5|NAA35_HUMAN	NAA35	NAA35_HUMAN N-alpha-acetyltransferase 35, NatC auxiliary subunit	15	5.73876	5.5413	6.26812	6.6225	6.32094	6.53653	6.89703	6.81732	6.04267	6.64295	1.09934	0.136639	0.0816768	0.0398258
sp|P17568|NDUB7_HUMAN	NDUFB7	NDUB7_HUMAN NADH dehydrogenase [ubiquinone] 1 beta subcomplex subunit 7	7	5.94595	5.45171	6.00353	6.1001	5.86922	6.18179	6.7653	7.01758	5.87532	6.45847	1.09925	0.136525	0.0492707	0.0814673
sp|Q7L3T8|SYPM_HUMAN	PARS2	SYPM_HUMAN Probable proline--tRNA ligase, mitochondrial	7	5.639	5.45108	6.50138	6.32945	6.48218	6.38966	7.02201	6.39481	5.98023	6.57217	1.09898	0.136168	0.0858089	0.0460863
sp|Q8NFV4|ABHDB_HUMAN	ABHD11	ABHDB_HUMAN Alpha/beta hydrolase domain-containing protein 11	9	5.64564	5.75091	5.89049	6.29245	6.04556	6.3668	6.58473	6.91537	5.89487	6.47811	1.09894	0.136113	0.0480739	0.056511
sp|P49419-2|AL7A1_HUMAN	ALDH7A1	AL7A1_HUMAN Isoform 2 of Alpha-aminoadipic semialdehyde dehydrogenase	37	5.30542	5.48404	6.16021	6.26371	5.98972	6.06971	6.77356	6.67337	5.80335	6.37659	1.09878	0.1359	0.0825896	0.0633476
sp|Q6UWY0|ARSK_HUMAN	ARSK	ARSK_HUMAN Arylsulfatase K	3	5.44676	5.58026	5.58483	6.32845	5.52089	7.1583	6.30656	6.21888	5.73508	6.30116	1.09871	0.135805	0.0698741	0.106472
sp|P11413-2|G6PD_HUMAN	G6PD	G6PD_HUMAN Isoform Long of Glucose-6-phosphate 1-dehydrogenase	41	5.76796	5.69722	6.3326	6.51008	6.41882	6.18928	7.0815	7.01651	6.07696	6.67653	1.09866	0.135747	0.0666826	0.0660507
sp|Q86VX9|MON1A_HUMAN	MON1A	MON1A_HUMAN Vacuolar fusion protein MON1 homolog A	5	5.09489	5.67755	6.39854	6.25757	6.06626	6.53089	6.54058	6.60034	5.85714	6.43452	1.09858	0.135636	0.101808	0.0384517
sp|Q96FZ2|HMCES_HUMAN	HMCES	HMCES_HUMAN Embryonic stem cell-specific 5-hydroxymethylcytosine-binding protein	10	5.54887	5.60354	6.16734	6.28542	5.99307	6.24853	7.02454	6.66554	5.90129	6.48292	1.09856	0.135613	0.0642434	0.0702137
sp|Q96B77|TM186_HUMAN	TMEM186	TM186_HUMAN Transmembrane protein 186	1	5.06451	5.74979	5.93104	6.70145	5.36148	6.80569	7.16333	6.42464	5.8617	6.43879	1.09845	0.13547	0.114781	0.120981
sp|Q9BXW7|CECR5_HUMAN	CECR5	CECR5_HUMAN Cat eye syndrome critical region protein 5	22	5.85926	6.12998	6.10258	6.38219	6.249	6.55841	7.30052	6.77441	6.1185	6.72058	1.0984	0.135408	0.0349421	0.0658703
sp|Q9NYK6|EURL_HUMAN	EURL	EURL_HUMAN Protein EURL homolog	1	5.49316	7.46322	5.95439	5.86933	6.49875	7.57886	6.23794	6.90203	6.19502	6.8044	1.09836	0.135357	0.140256	0.0858458
sp|O15194|CTDSL_HUMAN	CTDSPL	CTDSL_HUMAN CTD small phosphatase-like protein	1	5.73798	5.32695	5.63259	6.38393	6.20046	6.15276	6.41579	6.58099	5.77036	6.3375	1.09828	0.135252	0.0770555	0.0313372
sp|P04899-4|GNAI2_HUMAN	GNAI2	GNAI2_HUMAN Isoform sGi2 of Guanine nucleotide-binding protein G(i) subunit alpha-2	21	5.70781	5.52597	6.4268	6.20232	6.25592	6.30756	6.69551	6.94873	5.96572	6.55193	1.09826	0.135222	0.0703537	0.0502668
sp|Q9Y548|YIPF1_HUMAN	YIPF1	YIPF1_HUMAN Protein YIPF1	1	5.94057	5.47735	6.55885	5.9026	7.11981	6.42622	6.18833	6.49117	5.96984	6.55638	1.09825	0.135207	0.0745904	0.0606337
sp|Q8NDA8|MROH1_HUMAN	MROH1	MROH1_HUMAN Maestro heat-like repeat-containing protein family member 1	3	5.40809	5.79594	6.30483	6.60509	6.48885	6.89571	6.1931	6.90403	6.02849	6.62042	1.09819	0.135127	0.0881819	0.0520426
sp|A0AVT1|UBA6_HUMAN	UBA6	UBA6_HUMAN Ubiquitin-like modifier-activating enzyme 6	53	5.89813	5.80985	6.01344	6.30122	6.35852	6.30312	6.82558	6.89361	6.00566	6.59521	1.09817	0.135095	0.0356243	0.0466069
sp|Q86UW7|CAPS2_HUMAN	CADPS2	CAPS2_HUMAN Calcium-dependent secretion activator 2	4	5.53563	5.80634	6.14149	6.88775	6.26328	6.2906	6.98748	7.21963	6.0928	6.69025	1.09806	0.134954	0.0960214	0.0727467
sp|Q9NQ48|LZTL1_HUMAN	LZTFL1	LZTL1_HUMAN Leucine zipper transcription factor-like protein 1	7	5.62754	5.75276	6.18833	6.25224	6.40813	6.23812	6.7119	6.79676	5.95522	6.53873	1.09798	0.134856	0.0522917	0.0398796
sp|Q9GZZ9|UBA5_HUMAN	UBA5	UBA5_HUMAN Ubiquitin-like modifier-activating enzyme 5	16	5.70329	5.54611	6.31484	6.35777	6.09979	6.22711	6.92504	7.01042	5.9805	6.56559	1.09783	0.134658	0.0695921	0.0713644
sp|P30101|PDIA3_HUMAN	PDIA3	PDIA3_HUMAN Protein disulfide-isomerase A3	66	5.74663	5.67519	5.87693	6.28034	6.36536	6.10017	6.62935	6.78729	5.89477	6.47054	1.09767	0.134451	0.0458497	0.0466881
sp|Q15629|TRAM1_HUMAN	TRAM1	TRAM1_HUMAN Translocating chain-associated membrane protein 1	3	5.95696	5.5519	6.29334	6.33881	6.74337	6.75024	6.53037	6.47303	6.03525	6.62425	1.09759	0.134344	0.0603902	0.0216571
sp|Q86WA9|S2611_HUMAN	SLC26A11	S2611_HUMAN Sodium-independent sulfate anion transporter	1	5.49538	5.25616	6.72744	6.67728	5.89681	6.41417	7.86676	6.33595	6.03906	6.62842	1.09759	0.13434	0.127897	0.129199
sp|P82650|RT22_HUMAN	MRPS22	RT22_HUMAN 28S ribosomal protein S22, mitochondrial	23	6.00255	5.65752	6.04395	6.38935	6.36596	6.16768	6.99437	6.91652	6.02334	6.61113	1.09759	0.134333	0.0496811	0.0615594
sp|Q9BPX7-2|CG025_HUMAN	C7orf25	CG025_HUMAN Isoform 2 of UPF0415 protein C7orf25	1	5.57363	5.27611	6.80393	7.31201	6.39668	6.92572	7.52454	6.55409	6.24142	6.85026	1.09755	0.134284	0.155898	0.0731746
sp|Q9NV31|IMP3_HUMAN	IMP3	IMP3_HUMAN U3 small nucleolar ribonucleoprotein protein IMP3	1	5.02437	6.30079	6.38028	5.69162	7.02292	6.47791	6.02326	6.15529	5.84926	6.41985	1.09755	0.134283	0.107726	0.0693318
sp|Q8IVS2|FABD_HUMAN	MCAT	FABD_HUMAN Malonyl-CoA-acyl carrier protein transacylase, mitochondrial	12	5.85814	6.1745	6.01719	6.03595	6.3939	6.39069	6.84926	6.79901	6.02144	6.60822	1.09745	0.134151	0.0215091	0.0378573
sp|P53597|SUCA_HUMAN	SUCLG1	SUCA_HUMAN Succinyl-CoA ligase [ADP/GDP-forming] subunit alpha, mitochondrial	15	5.7701	5.82768	5.98133	6.27574	6.25501	6.2386	6.75458	6.92927	5.96371	6.54436	1.09736	0.134043	0.0379495	0.0536309
sp|Q5W0U4|BSPRY_HUMAN	BSPRY	BSPRY_HUMAN B box and SPRY domain-containing protein	2	6.05962	6.51913	5.70412	5.98113	6.39867	6.97984	6.60778	6.64015	6.066	6.65661	1.09736	0.134042	0.055785	0.0361446
sp|Q7Z7H8-2|RM10_HUMAN	MRPL10	RM10_HUMAN Isoform 2 of 39S ribosomal protein L10, mitochondrial	9	5.94878	5.68124	5.99137	6.29158	6.2123	6.29268	6.84413	6.89083	5.97824	6.55999	1.09731	0.133971	0.0418106	0.0544341
sp|P18085|ARF4_HUMAN	ARF4	ARF4_HUMAN ADP-ribosylation factor 4	15	5.76132	5.91241	6.12037	6.46334	6.33785	6.53655	6.81067	6.93147	6.06436	6.65414	1.09725	0.133896	0.0501286	0.0402578
sp|Q8IWV8-4|UBR2_HUMAN	UBR2	UBR2_HUMAN Isoform 4 of E3 ubiquitin-protein ligase UBR2	25	5.9423	5.87467	6.52031	6.72203	6.12283	6.5903	7.27641	7.50368	6.26483	6.8733	1.09713	0.133729	0.0671266	0.0921377
sp|Q9H4A6|GOLP3_HUMAN	GOLPH3	GOLP3_HUMAN Golgi phosphoprotein 3	9	5.99983	5.87155	6.32292	6.61774	6.58289	6.48018	7.03678	7.12141	6.20301	6.80532	1.0971	0.133693	0.0540743	0.047135
sp|O75365|TP4A3_HUMAN	PTP4A3	TP4A3_HUMAN Protein tyrosine phosphatase type IVA 3	1	6.02121	5.75308	5.87967	6.65045	7.72118	6.52544	6.77793	5.639	6.0761	6.66589	1.09707	0.133651	0.0655442	0.12848
sp|Q96IJ6-2|GMPPA_HUMAN	GMPPA	GMPPA_HUMAN Isoform 2 of Mannose-1-phosphate guanyltransferase alpha	14	5.56273	5.52153	6.49786	6.55824	6.06134	6.31553	6.95693	7.14286	6.03509	6.61916	1.09678	0.133274	0.0944481	0.07761
sp|Q9UGJ1|GCP4_HUMAN	TUBGCP4	GCP4_HUMAN Gamma-tubulin complex component 4	6	5.74478	5.59335	6.46441	6.54617	6.33999	6.59887	7.14292	6.62315	6.08718	6.67623	1.09677	0.133261	0.0801488	0.0503999
sp|P33992|MCM5_HUMAN	MCM5	MCM5_HUMAN DNA replication licensing factor MCM5	54	5.95754	5.82751	6.17348	6.36721	6.3143	6.48267	7.04261	6.83923	6.08143	6.6697	1.09673	0.133211	0.0391396	0.0496582
sp|P22695|QCR2_HUMAN	UQCRC2	QCR2_HUMAN Cytochrome b-c1 complex subunit 2, mitochondrial	24	5.72535	5.825	6.24389	6.40136	6.34157	6.54526	6.9778	6.67117	6.0489	6.63395	1.09672	0.133195	0.0537449	0.040163
sp|Q9Y4E6|WDR7_HUMAN	WDR7	WDR7_HUMAN WD repeat-containing protein 7	11	6.10492	5.883	5.95406	6.79867	6.73549	6.03573	6.86943	7.4899	6.18516	6.78264	1.0966	0.133035	0.0677979	0.087962
sp|P0CG08|GPHRB_HUMAN	GPR89B	GPHRB_HUMAN Golgi pH regulator B	6	5.87882	5.50483	6.39228	6.62885	6.37202	6.06122	7.26132	7.06712	6.10119	6.69042	1.09658	0.133005	0.0829424	0.0847759
sp|Q9Y230|RUVB2_HUMAN	RUVBL2	RUVB2_HUMAN RuvB-like 2	64	5.72735	5.82389	6.05837	6.25463	6.14668	6.23803	6.81687	6.96637	5.96606	6.54199	1.09653	0.132951	0.0397814	0.0626733
sp|Q86VN1|VPS36_HUMAN	VPS36	VPS36_HUMAN Vacuolar protein-sorting-associated protein 36	15	5.66754	5.94117	6.2212	6.58369	6.30191	6.59494	7.07067	6.80197	6.1034	6.69237	1.0965	0.132905	0.0642165	0.048578
sp|Q71UI9|H2AV_HUMAN	H2AFV	H2AV_HUMAN Histone H2A.V	2	5.46228	5.95162	5.85518	6.42787	6.48843	7.43962	5.94861	6.1062	5.92424	6.49572	1.09646	0.132859	0.0669946	0.102967
sp|Q5JWF2|GNAS1_HUMAN	GNAS	GNAS1_HUMAN Guanine nucleotide-binding protein G(s) subunit alpha isoforms XLas	14	5.89091	5.73036	6.32831	6.11165	6.41236	6.25202	6.93334	6.78258	6.01531	6.59507	1.09638	0.132751	0.0433425	0.0480012
sp|P30154-2|2AAB_HUMAN	PPP2R1B	2AAB_HUMAN Isoform 2 of Serine/threonine-protein phosphatase 2A 65 kDa regulatory subunit A beta isoform	28	5.97682	5.73636	6.14233	6.3911	6.08493	6.68021	6.86012	6.95707	6.06165	6.64558	1.09633	0.132685	0.0454851	0.0588321
sp|Q15436|SC23A_HUMAN	SEC23A	SC23A_HUMAN Protein transport protein Sec23A	23	5.50928	5.56351	6.0749	6.44089	5.97864	6.29317	6.69107	6.89655	5.89715	6.46486	1.09627	0.132602	0.0751377	0.0633641
sp|O43299|AP5Z1_HUMAN	AP5Z1	AP5Z1_HUMAN AP-5 complex subunit zeta-1	2	6.163	6.27575	5.58021	6.42709	6.36546	7.00777	6.83486	6.58776	6.11151	6.69896	1.09612	0.132408	0.0606002	0.0419943
sp|Q99714|HCD2_HUMAN	HSD17B10	HCD2_HUMAN 3-hydroxyacyl-CoA dehydrogenase type-2	27	5.56709	5.99529	6.22126	6.27878	6.37153	6.27313	6.72465	7.00553	6.01561	6.59371	1.0961	0.132381	0.0537062	0.0509718
sp|P14618-2|KPYM_HUMAN	PKM	KPYM_HUMAN Isoform M1 of Pyruvate kinase PKM	231	5.66797	5.65617	6.12031	6.40259	6.12551	6.13302	6.98142	6.89792	5.96176	6.53447	1.09606	0.132331	0.0611846	0.0717943
sp|P60981|DEST_HUMAN	DSTN	DEST_HUMAN Destrin	23	5.91537	5.97292	6.03042	6.17354	6.34183	6.29926	6.74934	7.01461	6.02306	6.60126	1.096	0.132244	0.0183909	0.0518379
sp|Q9P2Y5|UVRAG_HUMAN	UVRAG	UVRAG_HUMAN UV radiation resistance-associated gene protein	2	5.51535	5.6251	5.88556	6.45924	6.41089	6.2107	6.37205	6.74206	5.87131	6.43393	1.09582	0.132016	0.0718035	0.0346541
sp|Q15126|PMVK_HUMAN	PMVK	PMVK_HUMAN Phosphomevalonate kinase	11	5.53097	5.35126	6.34332	6.68553	5.92142	5.8637	7.05619	7.36039	5.97777	6.55042	1.0958	0.131981	0.106972	0.117562
sp|Q92665|RT31_HUMAN	MRPS31	RT31_HUMAN 28S ribosomal protein S31, mitochondrial	17	5.84647	5.54218	6.26612	6.36249	6.22112	6.21765	6.92191	6.9556	6.00432	6.57907	1.09572	0.131884	0.0634421	0.0631637
sp|O15063|K0355_HUMAN	KIAA0355	K0355_HUMAN Uncharacterized protein KIAA0355	4	5.43657	5.73735	6.35793	6.46713	6.11147	6.86431	6.79525	6.52479	5.99974	6.57395	1.09571	0.13186	0.0823736	0.0519267
sp|Q9H977|WDR54_HUMAN	WDR54	WDR54_HUMAN WD repeat-containing protein 54	5	6.07279	5.71371	6.01047	6.07598	6.08528	6.52704	6.85969	6.68512	5.96824	6.53928	1.09568	0.131827	0.0288769	0.0507337
sp|Q9NYL2-2|MLTK_HUMAN	MLTK	MLTK_HUMAN Isoform 2 of Mitogen-activated protein kinase kinase kinase MLT	6	5.84579	5.8674	6.58069	6.46658	6.3359	6.56345	7.24504	6.98509	6.19012	6.78237	1.09568	0.131823	0.0626844	0.0603381
sp|O43150|ASAP2_HUMAN	ASAP2	ASAP2_HUMAN Arf-GAP with SH3 domain, ANK repeat and PH domain-containing protein 2	1	4.94026	5.86946	5.68417	6.35538	6.6366	6.62778	6.01717	5.75331	5.71232	6.25871	1.09565	0.13179	0.102829	0.0710236
sp|Q9UBQ7|GRHPR_HUMAN	GRHPR	GRHPR_HUMAN Glyoxylate reductase/hydroxypyruvate reductase	23	5.51454	5.55269	6.20361	6.52552	5.90053	6.13782	6.80585	7.22799	5.94909	6.51805	1.09564	0.131771	0.0836544	0.0934374
sp|P54886-2|P5CS_HUMAN	ALDH18A1	P5CS_HUMAN Isoform Short of Delta-1-pyrroline-5-carboxylate synthase	2	5.28094	5.43671	6.00703	6.66573	5.384	6.32208	7.33839	6.58217	5.8476	6.40666	1.0956	0.131727	0.107464	0.125903
sp|Q99726|ZNT3_HUMAN	SLC30A3	ZNT3_HUMAN Zinc transporter 3	3	6.0454	6.21638	6.39329	5.67462	6.30795	6.40973	6.82092	7.11703	6.08242	6.66391	1.0956	0.131722	0.0504295	0.0562339
sp|Q8IZ81|ELMD2_HUMAN	ELMOD2	ELMD2_HUMAN ELMO domain-containing protein 2	12	5.47126	5.40342	6.55147	6.38717	6.09981	6.06832	6.93613	6.98408	5.95333	6.52208	1.09554	0.131636	0.10082	0.0776322
sp|O75971|SNPC5_HUMAN	SNAPC5	SNPC5_HUMAN snRNA-activating protein complex subunit 5	1	6.527	5.82801	6.16521	5.14575	7.11648	6.43513	6.86663	5.50867	5.91649	6.48173	1.09554	0.131636	0.0993459	0.109095
sp|O15533-3|TPSN_HUMAN	TAPBP	TPSN_HUMAN Isoform 3 of Tapasin	5	6.59988	6.61351	6.42671	5.68063	6.55365	7.57396	6.95859	6.65272	6.33018	6.93473	1.0955	0.131593	0.0697142	0.0662876
sp|P82912|RT11_HUMAN	MRPS11	RT11_HUMAN 28S ribosomal protein S11, mitochondrial	3	5.87113	5.97476	5.85005	6.2148	6.60796	6.41469	6.60119	6.56799	5.97769	6.54796	1.0954	0.131458	0.0279722	0.0138281
sp|Q15006|EMC2_HUMAN	EMC2	EMC2_HUMAN ER membrane protein complex subunit 2	8	5.8461	5.72715	6.12911	6.18334	6.15277	6.26743	7.0779	6.6622	5.97142	6.54007	1.09523	0.131232	0.0368357	0.0641776
sp|P12273|PIP_HUMAN	PIP	PIP_HUMAN Prolactin-inducible protein	5	5.80928	7.4466	5.16413	6.33129	7.32568	9.52682	4.44109	5.8122	6.18783	6.77645	1.09513	0.131097	0.156026	0.32162
sp|Q14155-5|ARHG7_HUMAN	ARHGEF7	ARHG7_HUMAN Isoform 5 of Rho guanine nucleotide exchange factor 7	21	5.81732	5.63244	6.03623	6.29065	6.16589	6.36698	6.7687	6.73317	5.94416	6.50868	1.09497	0.130893	0.0477604	0.0448454
sp|Q96JB5|CK5P3_HUMAN	CDK5RAP3	CK5P3_HUMAN CDK5 regulatory subunit-associated protein 3	19	5.73344	5.87944	6.33312	6.55181	6.29906	6.54468	7.14211	6.83801	6.12445	6.70596	1.09495	0.130864	0.0624673	0.0543997
sp|Q6PI48|SYDM_HUMAN	DARS2	SYDM_HUMAN Aspartate--tRNA ligase, mitochondrial	22	5.99905	5.97867	6.37155	6.40919	6.54314	6.70889	7.10856	6.7481	6.18961	6.77717	1.09493	0.130834	0.037558	0.0351349
sp|Q8N511|TM199_HUMAN	TMEM199	TM199_HUMAN Transmembrane protein 199	2	6.01707	5.78783	6.33303	6.62731	6.26721	6.74376	6.98435	7.11672	6.19131	6.77801	1.09476	0.130617	0.059223	0.0551628
sp|Q8WVM8|SCFD1_HUMAN	SCFD1	SCFD1_HUMAN Sec1 family domain-containing protein 1	30	5.70867	5.59683	6.10913	6.40153	6.12548	6.26848	6.88086	6.79684	5.95404	6.51791	1.0947	0.130542	0.0622489	0.0577974
sp|P25205|MCM3_HUMAN	MCM3	MCM3_HUMAN DNA replication licensing factor MCM3	59	5.94845	5.85318	6.03382	6.2382	6.41296	6.48246	6.69159	6.76481	6.01841	6.58796	1.09463	0.130448	0.0272586	0.0253649
sp|Q9Y5X3|SNX5_HUMAN	SNX5	SNX5_HUMAN Sorting nexin-5	22	5.87767	5.76615	5.93962	6.21187	6.21562	6.09854	6.78146	6.95092	5.94883	6.51164	1.09461	0.130414	0.031852	0.0641853
sp|Q0VDF9|HSP7E_HUMAN	HSPA14	HSP7E_HUMAN Heat shock 70 kDa protein 14	18	5.89997	5.91952	6.10111	6.22588	6.3509	6.22875	7.00448	6.84558	6.03662	6.60743	1.09456	0.130348	0.025728	0.0568682
sp|P53667|LIMK1_HUMAN	LIMK1	LIMK1_HUMAN LIM domain kinase 1	9	5.65011	5.58832	6.14233	6.50217	6.37294	6.36023	6.79355	6.61341	5.97073	6.53503	1.09451	0.130286	0.0724199	0.03183
sp|Q96S55|WRIP1_HUMAN	WRNIP1	WRIP1_HUMAN ATPase WRNIP1	19	5.77725	5.45801	6.45456	6.41691	6.26749	6.169	6.9273	7.02103	6.02668	6.5962	1.0945	0.130272	0.0813424	0.0666969
sp|Q9ULM6|CNOT6_HUMAN	CNOT6	CNOT6_HUMAN CCR4-NOT transcription complex subunit 6	6	5.54238	5.59138	6.19965	6.64471	6.07931	6.18149	7.08914	6.89224	5.99453	6.56055	1.09442	0.130169	0.0878391	0.0769566
sp|Q13151|ROA0_HUMAN	HNRNPA0	ROA0_HUMAN Heterogeneous nuclear ribonucleoprotein A0	8	6.32088	5.69989	6.42232	5.89492	7.15368	6.32146	6.88748	6.26981	6.0845	6.65811	1.09427	0.129973	0.0564459	0.0650244
sp|Q9UI43|RRMJ2_HUMAN	FTSJ2	RRMJ2_HUMAN Putative ribosomal RNA methyltransferase 2	3	5.88799	5.39546	6.69253	6.68062	7.12668	5.77254	6.54764	7.53312	6.16415	6.745	1.09423	0.129915	0.10316	0.113281
sp|P50148|GNAQ_HUMAN	GNAQ	GNAQ_HUMAN Guanine nucleotide-binding protein G(q) subunit alpha	2	5.79229	5.29146	5.60587	6.71493	5.89602	7.0176	5.9392	6.7564	5.85114	6.40231	1.0942	0.129874	0.104565	0.0890333
sp|Q9UPM9|B9D1_HUMAN	B9D1	B9D1_HUMAN B9 domain-containing protein 1	2	5.68748	5.41579	5.5123	6.56703	5.79785	6.01858	7.07951	6.46909	5.79565	6.34126	1.09414	0.129798	0.0908277	0.0892429
sp|Q8WVR3|CG043_HUMAN	C7orf43	CG043_HUMAN Uncharacterized protein C7orf43	1	6.06628	6.08494	6.36162	5.69963	7.05588	6.93709	6.34544	6.15305	6.05312	6.62287	1.09412	0.129777	0.0448708	0.0666153
sp|O60613|SEP15_HUMAN	SEPTIN15	SEP15_HUMAN 15 kDa selenoprotein	4	5.84423	5.43687	5.41399	6.3686	6.44431	6.00787	6.59884	6.17998	5.76592	6.30775	1.09397	0.129574	0.0776574	0.041908
tr|I3L356|I3L356_HUMAN	EPN2	I3L356_HUMAN Epsin-2 (Fragment)	1	5.19373	7.25395	5.60671	5.25906	5.55698	6.86209	6.7624	6.3212	5.82836	6.37567	1.0939	0.129486	0.166002	0.0932053
sp|Q9Y4I1-3|MYO5A_HUMAN	MYO5A	MYO5A_HUMAN Isoform 3 of Unconventional myosin-Va	10	5.88869	5.77847	6.27215	6.2962	6.61605	6.47816	6.78326	6.63377	6.05888	6.62781	1.0939	0.129482	0.0436048	0.0188315
sp|Q96SL8|FIZ1_HUMAN	FIZ1	FIZ1_HUMAN Flt3-interacting zinc finger protein 1	1	5.17007	5.32985	6.58352	6.44761	6.25444	6.25321	6.69011	6.54145	5.88276	6.4348	1.09384	0.129402	0.12506	0.0338176
sp|O43175|SERA_HUMAN	PHGDH	SERA_HUMAN D-3-phosphoglycerate dehydrogenase	52	5.76875	5.62866	6.36942	6.35681	6.26893	6.3125	6.83804	6.96735	6.03091	6.59671	1.09382	0.12937	0.0643139	0.0542227
sp|P23528|COF1_HUMAN	CFL1	COF1_HUMAN Cofilin-1	68	6.08878	6.003	5.81456	5.93189	6.20449	6.67713	6.60903	6.58302	5.95956	6.51842	1.09378	0.129317	0.0194663	0.0326787
sp|Q6P9B9|INT5_HUMAN	INTS5	INT5_HUMAN Integrator complex subunit 5	5	5.46554	5.5711	6.81605	6.59548	6.28574	6.45986	7.08678	6.90702	6.11204	6.68485	1.09372	0.129241	0.11335	0.0560266
sp|Q15020|SART3_HUMAN	SART3	SART3_HUMAN Squamous cell carcinoma antigen recognized by T-cells 3	38	5.77735	5.57586	6.23525	6.30641	6.29314	6.17367	6.7722	6.89424	5.97372	6.53331	1.09368	0.129186	0.0592585	0.0540694
sp|Q02218|ODO1_HUMAN	OGDH	ODO1_HUMAN 2-oxoglutarate dehydrogenase, mitochondrial	37	5.60986	5.77305	5.93714	6.44488	5.98748	6.16995	6.90256	6.93104	5.94123	6.49776	1.09367	0.12918	0.0608245	0.0753656
sp|Q8N8D1|PDCD7_HUMAN	PDCD7	PDCD7_HUMAN Programmed cell death protein 7	1	6.41065	6.39222	5.5222	5.42988	6.88068	6.68405	7.04569	5.36811	5.93874	6.49463	1.0936	0.129092	0.0901972	0.117855
sp|Q9H0F7|ARL6_HUMAN	ARL6	ARL6_HUMAN ADP-ribosylation factor-like protein 6	3	5.39971	6.20354	6.30725	5.59844	6.26586	6.47777	6.44407	6.51925	5.87723	6.42674	1.0935	0.128949	0.0759112	0.0173606
sp|Q9BQ24-2|ZFY21_HUMAN	ZFYVE21	ZFY21_HUMAN Isoform 2 of Zinc finger FYVE domain-containing protein 21	4	5.9017	5.35793	6.31977	6.58848	6.38837	6.44608	6.90788	6.68262	6.04197	6.60624	1.09339	0.12881	0.0887922	0.0360273
sp|Q9Y2Z4|SYYM_HUMAN	YARS2	SYYM_HUMAN Tyrosine--tRNA ligase, mitochondrial	16	5.97108	5.87135	5.98002	6.09363	6.63501	6.33528	6.68635	6.4927	5.97902	6.53733	1.09338	0.128794	0.0152044	0.0241159
sp|Q96BR1|SGK3_HUMAN	SGK3	SGK3_HUMAN Serine/threonine-protein kinase Sgk3	1	5.50167	5.83784	5.3315	6.32767	6.51796	5.46516	6.89715	6.26519	5.74967	6.28636	1.09334	0.128747	0.0763565	0.0963909
sp|P01116|RASK_HUMAN	KRAS	RASK_HUMAN GTPase KRas	3	5.51331	5.69006	5.55913	5.75221	6.35663	6.05294	5.8724	6.33295	5.62868	6.15373	1.09328	0.128665	0.0197768	0.0378314
sp|P37837|TALDO_HUMAN	TALDO1	TALDO_HUMAN Transaldolase	51	6.05517	6.01451	5.91384	5.91424	6.36354	6.30819	6.7338	6.72036	5.97444	6.53147	1.09324	0.128605	0.0119998	0.0347643
tr|H3BT54|H3BT54_HUMAN	FANCI	H3BT54_HUMAN Fanconi anemia group I protein (Fragment)	1	5.21926	6.17725	6.73993	4.80868	7.16549	5.35031	6.15812	6.40992	5.73628	6.27096	1.09321	0.128571	0.153618	0.119327
sp|Q14644|RASA3_HUMAN	RASA3	RASA3_HUMAN Ras GTPase-activating protein 3	5	5.87947	5.41716	6.08418	6.42394	6.15623	6.71534	6.69024	6.45929	5.95119	6.50528	1.09311	0.128432	0.0707281	0.0399169
tr|C9JBJ1|C9JBJ1_HUMAN	GART	C9JBJ1_HUMAN Phosphoribosylformylglycinamidine cyclo-ligase (Fragment)	1	6.38722	5.5629	7.64258	3.1951	4.33649	11.3297	5.58308	3.6601	5.69695	6.22734	1.0931	0.128427	0.329003	0.561006
sp|Q8N2F6|ARM10_HUMAN	ARMC10	ARM10_HUMAN Armadillo repeat-containing protein 10	9	6.19162	5.77005	6.17133	5.9832	6.45884	6.97899	6.43049	6.49254	6.02905	6.59022	1.09308	0.128395	0.0325949	0.0395164
sp|O00469-2|PLOD2_HUMAN	PLOD2	PLOD2_HUMAN Isoform 2 of Procollagen-lysine,2-oxoglutarate 5-dioxygenase 2	11	5.85378	5.46352	6.55738	6.33266	6.12435	6.44985	6.98576	6.90039	6.05183	6.61509	1.09307	0.128388	0.0809379	0.0609023
sp|Q32NB8|PGPS1_HUMAN	PGS1	PGPS1_HUMAN CDP-diacylglycerol--glycerol-3-phosphate 3-phosphatidyltransferase, mitochondrial	4	6.12552	6.20636	6.54436	6.42304	6.60135	6.94387	7.5132	6.59162	6.32482	6.91251	1.09292	0.128185	0.0304944	0.0625919
tr|E9PN48|E9PN48_HUMAN	ARFGAP2	E9PN48_HUMAN ADP-ribosylation factor GTPase-activating protein 2 (Fragment)	2	6.11689	6.12203	6.06352	5.46474	6.24016	6.70837	6.70073	6.32032	5.94179	6.4924	1.09267	0.127852	0.0537102	0.0380709
sp|Q99623|PHB2_HUMAN	PHB2	PHB2_HUMAN Prohibitin-2	58	5.68586	5.69151	6.22599	6.28921	6.36967	6.24383	6.71325	6.77931	5.97314	6.52651	1.09264	0.127823	0.0551609	0.0398852
sp|P08133|ANXA6_HUMAN	ANXA6	ANXA6_HUMAN Annexin A6	62	5.77215	5.62108	6.10647	6.38608	6.26057	6.06337	6.83291	6.94163	5.97144	6.52462	1.09264	0.127814	0.0574141	0.0657087
sp|P49915|GUAA_HUMAN	GMPS	GUAA_HUMAN GMP synthase [glutamine-hydrolyzing]	51	5.61534	5.64098	6.06757	6.38896	5.97939	6.10252	6.9101	6.91456	5.92821	6.47664	1.09251	0.127649	0.0625197	0.0780647
sp|Q9NX46|ARHL2_HUMAN	ADPRHL2	ARHL2_HUMAN Poly(ADP-ribose) glycohydrolase ARH3	8	5.85256	5.80918	6.23147	6.49138	6.24941	6.54715	6.93767	6.90535	6.09615	6.6599	1.09248	0.127602	0.0532561	0.0489335
sp|P27037|AVR2A_HUMAN	ACVR2A	AVR2A_HUMAN Activin receptor type-2A	1	6.57862	5.19125	5.44869	6.69505	6.72225	5.3058	6.78274	7.31422	5.9784	6.53125	1.09247	0.1276	0.128628	0.131547
sp|Q9UQ13|SHOC2_HUMAN	SHOC2	SHOC2_HUMAN Leucine-rich repeat protein SHOC-2	5	5.72852	5.5439	5.86967	6.57838	6.05949	6.25202	6.58722	7.01129	5.93012	6.4775	1.09231	0.127378	0.0762703	0.0644307
sp|P04844|RPN2_HUMAN	RPN2	RPN2_HUMAN Dolichyl-diphosphooligosaccharide--protein glycosyltransferase subunit 2	29	5.79877	5.85337	6.2161	6.32256	6.26658	6.48928	6.81311	6.85444	6.0477	6.60585	1.09229	0.127358	0.0430802	0.0422283
sp|Q8N5D0|WDTC1_HUMAN	WDTC1	WDTC1_HUMAN WD and tetratricopeptide repeats protein 1	3	5.72351	5.7929	6.15229	6.24611	6.34932	6.22419	6.77057	6.7778	5.9787	6.53047	1.09229	0.127354	0.043325	0.0437996
sp|Q9Y2D4|EXC6B_HUMAN	EXOC6B	EXC6B_HUMAN Exocyst complex component 6B	8	5.53957	5.93412	6.35986	6.51321	6.44125	6.32906	6.91282	6.91054	6.08669	6.64842	1.09229	0.127353	0.0721867	0.0462398
sp|Q96A35|RM24_HUMAN	MRPL24	RM24_HUMAN 39S ribosomal protein L24, mitochondrial	9	5.32527	5.2557	6.23372	6.47766	5.85298	6.00248	6.83256	6.75284	5.82309	6.36022	1.09224	0.127291	0.1071	0.0792674
sp|Q2M296-3|MTHSD_HUMAN	MTHFSD	MTHSD_HUMAN Isoform 3 of Methenyltetrahydrofolate synthase domain-containing protein	4	5.53602	5.50723	6.1528	6.29958	6.57786	6.48196	6.45514	6.14726	5.87391	6.41556	1.09221	0.127254	0.0700281	0.0290637
sp|Q7KZN9|COX15_HUMAN	COX15	COX15_HUMAN Cytochrome c oxidase assembly protein COX15 homolog	7	5.60681	5.71148	6.50009	6.17041	6.59894	6.11154	6.77672	6.71274	5.9972	6.54999	1.09217	0.127203	0.0692168	0.0460156
sp|Q6P996|PDXD1_HUMAN	PDXDC1	PDXD1_HUMAN Pyridoxal-dependent decarboxylase domain-containing protein 1	25	6.03156	5.89739	6.56607	6.48774	6.51337	6.71982	7.01235	7.03965	6.24569	6.8213	1.09216	0.127185	0.0529734	0.036825
sp|Q8N6M0|OTU6B_HUMAN	OTUD6B	OTU6B_HUMAN OTU domain-containing protein 6B	5	5.37773	5.62129	5.34919	6.38954	6.06301	6.48456	5.91323	6.37125	5.68444	6.20801	1.09211	0.127114	0.085438	0.0427245
sp|Q16850|CP51A_HUMAN	CYP51A1	CP51A_HUMAN Lanosterol 14-alpha demethylase	16	5.73803	5.45873	6.15486	6.68094	6.0401	6.2263	7.05573	6.92345	6.00814	6.5614	1.09208	0.127084	0.0885426	0.0766838
tr|Q5LJA5|Q5LJA5_HUMAN	UCHL5	Q5LJA5_HUMAN Ubiquitin carboxyl-terminal hydrolase isozyme L5	3	5.93795	5.94459	6.03158	6.78906	6.63279	6.04772	7.37943	6.91665	6.17579	6.74415	1.09203	0.127011	0.0665603	0.0825904
sp|Q9NWS6|F118A_HUMAN	FAM118A	F118A_HUMAN Protein FAM118A	2	6.54528	6.04214	6.82409	6.3212	6.18466	6.79229	7.61335	7.50839	6.43318	7.02467	1.09194	0.126899	0.0516197	0.0951458
sp|P42336|PK3CA_HUMAN	PIK3CA	PK3CA_HUMAN Phosphatidylinositol 4,5-bisphosphate 3-kinase catalytic subunit alpha isoform	10	6.2293	5.57461	5.68825	6.1956	6.15608	6.83889	6.39765	6.47153	5.92194	6.46604	1.09188	0.126812	0.057232	0.0437246
sp|Q8N7H5|PAF1_HUMAN	PAF1	PAF1_HUMAN RNA polymerase II-associated factor 1 homolog	17	5.76891	5.83525	6.3617	6.18943	6.44105	6.46814	6.87594	6.58904	6.03882	6.59354	1.09186	0.126787	0.046957	0.0301741
sp|Q9NRG9|AAAS_HUMAN	AAAS	AAAS_HUMAN Aladin	15	5.93743	5.81835	6.28204	6.35183	6.41878	6.35798	6.94865	6.90245	6.09741	6.65696	1.09177	0.126667	0.042587	0.0468229
sp|Q9HA72|CAHM2_HUMAN	CALHM2	CAHM2_HUMAN Calcium homeostasis modulator protein 2	1	5.50731	6.05736	6.0442	6.64694	5.09083	7.05314	7.40777	6.92794	6.06395	6.61992	1.09168	0.126555	0.0767703	0.157019
sp|Q9Y3Y2-3|CHTOP_HUMAN	CHTOP	CHTOP_HUMAN Isoform 2 of Chromatin target of PRMT1 protein	1	6.70616	5.21533	5.08207	6.45542	6.75675	6.64851	6.67879	5.524	5.86475	6.40201	1.09161	0.126457	0.14236	0.0917079
sp|P55210-3|CASP7_HUMAN	CASP7	CASP7_HUMAN Isoform Alpha' of Caspase-7	10	5.66277	5.74322	6.12431	6.32297	6.36229	6.32746	6.78677	6.56192	5.96332	6.50961	1.09161	0.126456	0.0524995	0.0325194
sp|Q8IZ40|RCOR2_HUMAN	RCOR2	RCOR2_HUMAN REST corepressor 2	2	4.98982	5.45649	7.04454	6.23497	6.5848	6.47187	6.13783	6.70063	5.93146	6.47378	1.09143	0.126223	0.15215	0.0374836
sp|Q9HAB8|PPCS_HUMAN	PPCS	PPCS_HUMAN Phosphopantothenate--cysteine ligase	10	5.78651	5.94998	5.90027	6.35007	6.23309	6.32102	6.73257	6.89299	5.99671	6.54492	1.09142	0.126204	0.0409075	0.0486163
sp|Q9H939|PPIP2_HUMAN	PSTPIP2	PPIP2_HUMAN Proline-serine-threonine phosphatase-interacting protein 2	11	5.5328	5.54689	6.02035	6.52717	5.99287	6.37362	6.855	6.56561	5.9068	6.44677	1.09142	0.1262	0.0798368	0.056082
sp|Q12931|TRAP1_HUMAN	TRAP1	TRAP1_HUMAN Heat shock protein 75 kDa, mitochondrial	75	5.85963	5.69068	6.05848	6.31691	6.35	6.15566	6.83884	6.76754	5.98142	6.52801	1.09138	0.126154	0.0450524	0.0503671
tr|F8W950|F8W950_HUMAN	AIMP2	F8W950_HUMAN Aminoacyl tRNA synthase complex-interacting multifunctional protein 2	1	4.93435	4.67225	6.02858	6.99511	5.70241	5.86132	6.02593	7.10788	5.65757	6.17438	1.09135	0.126112	0.188737	0.103037
sp|Q7Z7C8-4|TAF8_HUMAN	TAF8	TAF8_HUMAN Isoform 3 of Transcription initiation factor TFIID subunit 8	4	5.90043	5.72235	5.49119	6.19741	6.79023	6.38144	6.2363	6.03247	5.82784	6.36011	1.09133	0.126089	0.0511243	0.0503901
sp|Q6P3W7|SCYL2_HUMAN	SCYL2	SCYL2_HUMAN SCY1-like protein 2	17	5.71723	6.11969	6.40815	6.09288	6.63388	6.19325	6.96614	6.76738	6.08449	6.64016	1.09133	0.126083	0.0465773	0.0493553
sp|Q14CB8-2|RHG19_HUMAN	ARHGAP19	RHG19_HUMAN Isoform 2 of Rho GTPase-activating protein 19	2	5.96431	6.29567	5.37362	6.24196	6.32829	6.80134	6.61808	6.3061	5.96889	6.51345	1.09123	0.12596	0.070797	0.0366658
sp|P20073|ANXA7_HUMAN	ANXA7	ANXA7_HUMAN Annexin A7	26	5.69217	5.58654	6.04912	6.38156	5.98475	5.99757	6.9323	6.95774	5.92735	6.46809	1.09123	0.125953	0.0610312	0.0851618
sp|Q6ZRI6|CO039_HUMAN	C15orf39	CO039_HUMAN Uncharacterized protein C15orf39	2	4.60796	5.79394	5.90608	6.19344	5.63755	5.86273	6.17616	6.87534	5.62535	6.13795	1.09112	0.125812	0.124227	0.0878037
sp|P48735|IDHP_HUMAN	IDH2	IDHP_HUMAN Isocitrate dehydrogenase [NADP], mitochondrial	29	5.58602	5.58553	6.01741	6.7436	5.95199	5.96761	7.01287	7.18031	5.98314	6.5282	1.0911	0.125781	0.0913036	0.101086
sp|Q9GZM5|YIPF3_HUMAN	YIPF3	YIPF3_HUMAN Protein YIPF3	7	5.96911	5.8396	6.1907	6.06052	6.03656	6.70249	6.64272	6.86762	6.01498	6.56235	1.091	0.125651	0.0246242	0.0553461
sp|Q8N1I0|DOCK4_HUMAN	DOCK4	DOCK4_HUMAN Dedicator of cytokinesis protein 4	1	6.13001	6.74492	6.55475	5.71871	6.89137	7.05512	7.01105	6.47807	6.2871	6.8589	1.09095	0.125584	0.0728296	0.0383656
tr|H0YHI0|H0YHI0_HUMAN	CHURC1-FNTB	H0YHI0_HUMAN Protein CHURC1-FNTB (Fragment)	9	5.79658	5.52761	5.89572	6.65467	5.85546	6.00164	7.16131	7.02751	5.96864	6.51148	1.09095	0.125582	0.0809344	0.104117
sp|P14550|AK1A1_HUMAN	AKR1A1	AK1A1_HUMAN Alcohol dehydrogenase [NADP(+)]	41	5.56134	5.54067	6.09492	6.3755	6.03281	5.94635	6.79286	6.9435	5.89311	6.42888	1.09092	0.125539	0.0698078	0.0796705
sp|Q9HCJ3|RAVR2_HUMAN	RAVER2	RAVR2_HUMAN Ribonucleoprotein PTB-binding 2	4	5.75548	5.88312	6.50088	7.07463	6.54974	6.77393	7.13405	7.0482	6.30353	6.87648	1.09089	0.125511	0.0965258	0.0387588
sp|Q01628|IFM3_HUMAN	IFITM3	IFM3_HUMAN Interferon-induced transmembrane protein 3	1	5.10842	5.37474	5.87642	7.06484	5.75571	7.30127	5.29994	7.19579	5.85611	6.38818	1.09086	0.125463	0.147956	0.158361
sp|Q16762|THTR_HUMAN	TST	THTR_HUMAN Thiosulfate sulfurtransferase	14	5.88943	6.22616	5.88791	6.06645	6.29242	6.46311	6.75977	6.74129	6.01749	6.56415	1.09085	0.125446	0.0269896	0.0344815
sp|Q6NUQ1|RINT1_HUMAN	RINT1	RINT1_HUMAN RAD50-interacting protein 1	15	5.86955	5.93209	6.37088	6.48551	6.44201	6.66668	7.02206	6.76708	6.16451	6.72446	1.09083	0.125432	0.0501438	0.0357627
sp|P19388|RPAB1_HUMAN	POLR2E	RPAB1_HUMAN DNA-directed RNA polymerases I, II, and III subunit RPABC1	12	5.63045	5.76591	6.24401	6.34149	6.22504	6.33253	6.82922	6.77288	5.99547	6.53992	1.09081	0.125401	0.0583726	0.0467243
sp|Q6P2Q9|PRP8_HUMAN	PRPF8	PRP8_HUMAN Pre-mRNA-processing-splicing factor 8	92	5.9734	5.81129	6.27689	6.30815	6.50101	6.37737	6.89448	6.8085	6.09243	6.64534	1.09075	0.125325	0.0395034	0.0369963
sp|Q96DC9|OTUB2_HUMAN	OTUB2	OTUB2_HUMAN Ubiquitin thioesterase OTUB2	3	5.15381	5.92203	5.57239	5.94443	5.77573	6.42401	6.33516	6.1081	5.64816	6.16075	1.09075	0.125324	0.0656835	0.0469262
sp|Q6ISB3|GRHL2_HUMAN	GRHL2	GRHL2_HUMAN Grainyhead-like protein 2 homolog	5	5.42354	5.15984	6.32049	6.41756	5.91623	6.41175	6.68263	6.42682	5.83036	6.35936	1.09073	0.125297	0.108482	0.0503984
sp|Q9Y3B7|RM11_HUMAN	MRPL11	RM11_HUMAN 39S ribosomal protein L11, mitochondrial	12	6.0311	5.56032	6.05953	6.38832	6.33801	6.41694	6.83558	6.62875	6.00982	6.55482	1.09069	0.125235	0.0566911	0.0341485
sp|Q9H4L7-2|SMRCD_HUMAN	SMARCAD1	SMRCD_HUMAN Isoform 2 of SWI/SNF-related matrix-associated actin-dependent regulator of chromatin subfamily A containing DEAD/H box 1	18	6.21023	5.7214	6.17893	6.21631	6.45264	6.49166	6.97127	6.61688	6.08172	6.63311	1.09066	0.125207	0.039589	0.0355903
sp|P08754|GNAI3_HUMAN	GNAI3	GNAI3_HUMAN Guanine nucleotide-binding protein G(k) subunit alpha	1	5.75247	6.53147	7.25811	5.84383	7.53181	6.53021	6.57889	7.04412	6.34647	6.92126	1.09057	0.12508	0.110327	0.0676657
sp|Q92791|SC65_HUMAN	LEPREL4	SC65_HUMAN Synaptonemal complex protein SC65	5	6.53109	6.3069	5.98514	6.95064	6.76329	7.01946	7.06357	7.26026	6.44344	7.02664	1.09051	0.125004	0.062953	0.0290903
sp|Q13084|RM28_HUMAN	MRPL28	RM28_HUMAN 39S ribosomal protein L28, mitochondrial	10	5.08422	5.54757	6.2984	6.63926	5.65215	6.14381	6.65424	7.25139	5.89236	6.4254	1.09046	0.12494	0.119792	0.106766
sp|Q9Y6D9|MD1L1_HUMAN	MAD1L1	MD1L1_HUMAN Mitotic spindle assembly checkpoint protein MAD1	16	5.6993	5.89601	6.05706	6.02213	6.21744	6.64091	6.47912	6.47721	5.91863	6.45367	1.0904	0.124858	0.0273295	0.0271444
sp|Q9BSG0|PADC1_HUMAN	PRADC1	PADC1_HUMAN Protease-associated domain-containing protein 1	2	5.44406	6.10803	4.96992	5.37725	6.01975	6.59667	6.02171	5.23975	5.47482	5.96947	1.09035	0.124793	0.0860834	0.0933272
sp|P53992|SC24C_HUMAN	SEC24C	SC24C_HUMAN Protein transport protein Sec24C	22	5.62607	5.7468	6.44274	6.48567	6.34921	6.28816	6.92717	6.93191	6.07532	6.62411	1.09033	0.124767	0.0744129	0.053375
sp|Q8N4J0|CI041_HUMAN	C9orf41	CI041_HUMAN UPF0586 protein C9orf41	5	5.72227	6.07293	6.32656	6.31456	6.16205	6.4771	6.69467	7.30881	6.10908	6.66066	1.09029	0.124709	0.046342	0.0727065
sp|Q96ME1-4|FXL18_HUMAN	FBXL18	FXL18_HUMAN Isoform 4 of F-box/LRR-repeat protein 18	13	5.67837	5.7089	6.22414	6.21228	6.14864	6.50721	6.52975	6.78874	5.95592	6.49359	1.09027	0.12469	0.0509004	0.0405103
sp|P41240|CSK_HUMAN	CSK	CSK_HUMAN Tyrosine-protein kinase CSK	18	5.66624	5.46137	6.42695	6.59314	6.03242	6.30497	7.11791	6.86989	6.03693	6.5813	1.09017	0.124558	0.0922367	0.0759152
sp|O95470|SGPL1_HUMAN	SGPL1	SGPL1_HUMAN Sphingosine-1-phosphate lyase 1	14	6.09651	5.86138	6.59569	6.16121	6.74533	6.59241	6.92824	6.67676	6.1787	6.73569	1.09015	0.124522	0.0495889	0.0211996
sp|P17706|PTN2_HUMAN	PTPN2	PTN2_HUMAN Tyrosine-protein phosphatase non-receptor type 2	8	5.48136	5.53338	6.15985	6.41728	5.85668	6.28124	6.89554	6.68098	5.89797	6.42861	1.08997	0.124289	0.0786021	0.0713144
sp|Q9GZZ1|NAA50_HUMAN	NAA50	NAA50_HUMAN N-alpha-acetyltransferase 50	25	5.65827	5.70961	6.08053	6.24167	6.10666	6.20204	6.61486	6.89792	5.92252	6.45537	1.08997	0.124289	0.047954	0.0570622
sp|P60484|PTEN_HUMAN	PTEN	PTEN_HUMAN Phosphatidylinositol 3,4,5-trisphosphate 3-phosphatase and dual-specificity protein phosphatase PTEN	6	5.95038	5.81979	5.90803	6.30074	6.07413	6.27561	6.83477	6.95093	5.99474	6.53386	1.08993	0.12424	0.0352195	0.0650856
sp|Q8TCG2|P4K2B_HUMAN	PI4K2B	P4K2B_HUMAN Phosphatidylinositol 4-kinase type 2-beta	4	5.36738	5.93611	6.02592	6.40532	6.60695	6.17133	6.75839	6.33137	5.93368	6.46701	1.08988	0.124171	0.0722684	0.0409417
sp|P51808|DYLT3_HUMAN	DYNLT3	DYLT3_HUMAN Dynein light chain Tctex-type 3	1	5.6217	5.98527	6.18511	5.86509	6.1943	6.69141	6.28268	6.61479	5.91429	6.44579	1.08987	0.124153	0.0398224	0.0378684
sp|Q9Y6M1|IF2B2_HUMAN	IGF2BP2	IF2B2_HUMAN Insulin-like growth factor 2 mRNA-binding protein 2	24	5.85512	5.62164	6.33172	6.1741	6.43546	6.29756	6.80992	6.59357	5.99564	6.53413	1.08981	0.12408	0.05313	0.0336803
sp|Q9H999|PANK3_HUMAN	PANK3	PANK3_HUMAN Pantothenate kinase 3	5	5.86373	6.08748	6.01631	7.026	6.61936	6.62998	6.99693	6.98912	6.24838	6.80885	1.0897	0.123928	0.0843017	0.0312443
sp|Q93084-5|AT2A3_HUMAN	ATP2A3	AT2A3_HUMAN Isoform SERCA3E of Sarcoplasmic/endoplasmic reticulum calcium ATPase 3	15	5.50957	5.46286	5.9025	6.0257	6.02874	6.03234	6.55541	6.33692	5.72516	6.23835	1.08964	0.12385	0.0490993	0.0410377
sp|P49588|SYAC_HUMAN	AARS	SYAC_HUMAN Alanine--tRNA ligase, cytoplasmic	63	5.89626	5.68429	6.09138	6.30571	6.23114	6.31708	6.80497	6.76991	5.99441	6.53078	1.08948	0.123636	0.0443591	0.0457501
sp|Q6NUM9|RETST_HUMAN	RETSAT	RETST_HUMAN All-trans-retinol 13,14-reductase	14	5.8253	5.70722	6.36802	6.09193	6.28931	6.51293	6.61858	6.71294	5.99812	6.53344	1.08925	0.123333	0.0490917	0.0278731
sp|P62191|PRS4_HUMAN	PSMC1	PRS4_HUMAN 26S protease regulatory subunit 4	48	5.8287	5.80314	5.86885	6.31611	6.24819	6.36834	6.71338	6.61211	5.9542	6.48551	1.08923	0.123311	0.0407753	0.0330703
sp|Q9H0C8|ILKAP_HUMAN	ILKAP	ILKAP_HUMAN Integrin-linked kinase-associated serine/threonine phosphatase 2C	17	5.79011	5.55662	6.09067	6.47589	5.98796	6.24698	6.92774	6.88304	5.97832	6.51143	1.08917	0.123234	0.0664505	0.0717801
sp|P48200|IREB2_HUMAN	IREB2	IREB2_HUMAN Iron-responsive element-binding protein 2	16	5.74249	5.82624	6.10927	6.37368	6.23325	6.22709	6.98332	6.75273	6.01292	6.5491	1.08917	0.12323	0.0477601	0.0580409
sp|Q9P107|GMIP_HUMAN	GMIP	GMIP_HUMAN GEM-interacting protein	3	5.66855	6.15525	6.68352	6.72391	6.18584	7.18871	7.06253	7.04361	6.30781	6.87017	1.08915	0.123208	0.0790671	0.0670646
sp|Q8TD30|ALAT2_HUMAN	GPT2	ALAT2_HUMAN Alanine aminotransferase 2	20	5.70426	5.82088	6.11144	6.34445	6.06453	6.2338	6.79287	7.02694	5.99526	6.52954	1.08912	0.123159	0.0482007	0.0696481
sp|O95352|ATG7_HUMAN	ATG7	ATG7_HUMAN Ubiquitin-like modifier-activating enzyme ATG7	17	5.82638	5.56935	6.4872	6.42544	6.25222	6.37878	6.9789	6.85802	6.07709	6.61698	1.08884	0.122792	0.0742125	0.0537066
sp|Q9Y5Y2|NUBP2_HUMAN	NUBP2	NUBP2_HUMAN Cytosolic Fe-S cluster assembly factor NUBP2	8	5.46439	5.91204	6.35199	6.61251	6.33337	6.75944	6.83674	6.5736	6.08523	6.62579	1.08883	0.12278	0.0829632	0.0338149
sp|Q9BYE7|PCGF6_HUMAN	PCGF6	PCGF6_HUMAN Polycomb group RING finger protein 6	1	5.29222	5.35961	6.44877	5.22362	3.67005	5.36135	6.14539	9.13045	5.58106	6.07681	1.08883	0.122776	0.104126	0.375661
sp|Q12770|SCAP_HUMAN	SCAP	SCAP_HUMAN Sterol regulatory element-binding protein cleavage-activating protein	1	4.33461	5.25021	7.13013	6.57595	5.44836	6.66142	7.39561	5.85204	5.82273	6.33936	1.08873	0.122642	0.217665	0.136634
sp|Q9NVR0|KLH11_HUMAN	KLHL11	KLH11_HUMAN Kelch-like protein 11	2	5.9835	4.58632	7.55902	5.52907	5.87178	5.19533	7.5438	7.1418	5.91448	6.43818	1.08855	0.122402	0.20986	0.169745
sp|P30837|AL1B1_HUMAN	ALDH1B1	AL1B1_HUMAN Aldehyde dehydrogenase X, mitochondrial	29	5.38053	5.41811	5.49896	5.58311	5.83551	5.93052	6.00943	6.04235	5.47018	5.95445	1.08853	0.122381	0.016463	0.0154739
sp|Q9BXY0|MAK16_HUMAN	MAK16	MAK16_HUMAN Protein MAK16 homolog	2	6.13135	6.32904	6.78263	5.4623	6.92323	7.14849	6.59395	6.22676	6.17633	6.72311	1.08853	0.122378	0.0888179	0.0597463
sp|Q53GT1|KLH22_HUMAN	KLHL22	KLH22_HUMAN Kelch-like protein 22	3	5.9257	5.29138	5.85234	6.72648	5.9539	6.60347	6.45089	6.89359	5.94897	6.47546	1.0885	0.122342	0.0992966	0.0607234
sp|Q6UXN9|WDR82_HUMAN	WDR82	WDR82_HUMAN WD repeat-containing protein 82	15	5.80167	6.0876	6.1143	6.34082	6.52631	6.6026	6.71189	6.65472	6.0861	6.62388	1.08836	0.122159	0.0363194	0.0119095
sp|Q9BQ48|RM34_HUMAN	MRPL34	RM34_HUMAN 39S ribosomal protein L34, mitochondrial	2	5.34351	4.94135	6.79636	6.52783	5.38439	5.89074	7.25117	7.16732	5.90226	6.4234	1.0883	0.12207	0.152368	0.144983
sp|Q8IYT2|CMTR2_HUMAN	CMTR2	CMTR2_HUMAN Cap-specific mRNA (nucleoside-2'-O-)-methyltransferase 2	2	6.01286	5.98345	6.3152	6.45098	6.8245	6.49133	6.78135	6.84969	6.19062	6.73672	1.08821	0.121961	0.0370505	0.0246422
sp|Q14168|MPP2_HUMAN	MPP2	MPP2_HUMAN MAGUK p55 subfamily member 2	3	5.68485	5.48344	6.05234	6.39814	6.05551	5.6023	6.64228	7.40005	5.90469	6.42504	1.08812	0.121842	0.0685198	0.120937
sp|Q96RP9|EFGM_HUMAN	GFM1	EFGM_HUMAN Elongation factor G, mitochondrial	35	5.73881	5.77899	6.17493	6.34033	6.10256	6.15003	6.92773	6.96823	6.00826	6.53714	1.08802	0.121711	0.0493001	0.0726745
sp|Q8WU76|SCFD2_HUMAN	SCFD2	SCFD2_HUMAN Sec1 family domain-containing protein 2	5	5.94221	5.91873	6.09422	6.11349	6.27795	6.32576	6.82187	6.75877	6.01716	6.54609	1.0879	0.12155	0.0167636	0.0433635
sp|Q13620|CUL4B_HUMAN	CUL4B	CUL4B_HUMAN Cullin-4B	40	5.9306	5.87873	6.37234	6.4327	6.40616	6.4867	6.98336	6.9008	6.15359	6.69426	1.08786	0.121495	0.0470079	0.0433225
sp|Q9H4G4|GAPR1_HUMAN	GLIPR2	GAPR1_HUMAN Golgi-associated plant pathogenesis-related protein 1	3	5.18611	5.57746	6.48733	6.40466	6.16739	6.05902	6.53388	6.97277	5.91389	6.43327	1.08782	0.121444	0.107501	0.0642121
sp|Q14697-2|GANAB_HUMAN	GANAB	GANAB_HUMAN Isoform 2 of Neutral alpha-glucosidase AB	91	5.60652	5.75595	6.01749	6.53064	6.08439	6.04882	6.94554	6.92959	5.97765	6.50209	1.08773	0.121324	0.0679036	0.0773753
sp|P51571|SSRD_HUMAN	SSR4	SSRD_HUMAN Translocon-associated protein subunit delta	8	5.60341	5.94831	6.04431	5.71773	6.22142	6.3646	6.10469	6.66839	5.82844	6.33978	1.08773	0.121322	0.0348626	0.0384083
sp|Q969T7|5NT3B_HUMAN	NT5C3B	5NT3B_HUMAN 7-methylguanosine phosphate-specific 5'-nucleotidase	3	5.61891	5.15969	6.32881	6.84544	6.33518	5.45824	7.09396	7.16411	5.98821	6.51287	1.08762	0.121169	0.124732	0.122372
sp|P27144|KAD4_HUMAN	AK4	KAD4_HUMAN Adenylate kinase 4, mitochondrial	16	5.97164	5.67415	6.15101	6.42517	6.23337	5.98005	7.03558	7.09385	6.05549	6.58571	1.08756	0.121095	0.0520681	0.0855173
sp|P52294|IMA5_HUMAN	KPNA1	IMA5_HUMAN Importin subunit alpha-5	16	5.7955	5.57608	6.18761	6.62439	6.27856	6.35851	6.85862	6.80526	6.04589	6.57524	1.08755	0.121087	0.076286	0.0454738
sp|Q8WXA9-2|SREK1_HUMAN	SREK1	SREK1_HUMAN Isoform 2 of Splicing regulatory glutamine/lysine-rich protein 1	9	5.91786	5.83568	5.95791	6.21618	6.47101	6.76066	6.44562	6.34356	5.98191	6.50521	1.08748	0.120991	0.0274595	0.027514
sp|Q9Y6Y8|S23IP_HUMAN	SEC23IP	S23IP_HUMAN SEC23-interacting protein	37	5.83953	5.5612	6.21537	6.4156	6.29826	6.19754	6.83968	6.79776	6.00793	6.53331	1.08745	0.120947	0.0635377	0.0509021
sp|A0JNW5|UH1BL_HUMAN	UHRF1BP1L	UH1BL_HUMAN UHRF1-binding protein 1-like	14	5.84972	5.65495	6.0839	6.31515	6.31645	6.30698	6.61088	6.75923	5.97593	6.49838	1.08743	0.120918	0.0478876	0.034459
sp|P22307|NLTP_HUMAN	SCP2	NLTP_HUMAN Non-specific lipid-transfer protein	55	6.57748	6.53156	6.74676	6.46673	6.38135	7.36937	7.43842	7.43324	6.58063	7.15559	1.08737	0.120845	0.018191	0.0722676
sp|P82933|RT09_HUMAN	MRPS9	RT09_HUMAN 28S ribosomal protein S9, mitochondrial	26	5.78841	5.91963	5.88682	6.40614	6.33775	6.31827	6.53828	6.90252	6.00025	6.5242	1.08732	0.12078	0.0460444	0.0415538
sp|Q9NS73|MBIP1_HUMAN	MBIP	MBIP1_HUMAN MAP3K12-binding inhibitory protein 1	1	5.06691	5.5051	5.95737	6.39007	6.14113	7.32525	5.90374	5.55021	5.72986	6.23008	1.0873	0.120751	0.0996297	0.123501
sp|O75648|MTU1_HUMAN	TRMU	MTU1_HUMAN Mitochondrial tRNA-specific 2-thiouridylase 1	11	5.77528	5.8724	5.97597	6.47558	6.51849	6.00004	6.8794	6.80477	6.02481	6.55068	1.08728	0.120728	0.0517008	0.0608623
sp|Q9BXF6|RFIP5_HUMAN	RAB11FIP5	RFIP5_HUMAN Rab11 family-interacting protein 5	9	5.7164	5.77879	6.21215	6.25773	6.38655	6.28642	6.70845	6.6721	5.99127	6.51338	1.08715	0.120545	0.0472573	0.0320631
sp|Q9BQC6|RT63_HUMAN	MRP63	RT63_HUMAN Ribosomal protein 63, mitochondrial	2	5.4142	5.80242	6.12772	6.02749	5.57084	6.44446	6.48787	6.90258	5.84296	6.35144	1.08702	0.120384	0.0541769	0.0881483
sp|Q14C86-6|GAPD1_HUMAN	GAPVD1	GAPD1_HUMAN Isoform 6 of GTPase-activating protein and VPS9 domain-containing protein 1	36	6.06139	5.89573	6.3372	6.1264	6.38689	6.61828	6.93426	6.60591	6.10518	6.63634	1.087	0.120353	0.0299153	0.0339443
sp|O15111|IKKA_HUMAN	CHUK	IKKA_HUMAN Inhibitor of nuclear factor kappa-B kinase subunit alpha	20	5.72402	6.13913	6.48248	6.72637	6.51368	6.7582	7.1395	6.84082	6.268	6.81305	1.08696	0.120296	0.0694583	0.037895
sp|Q969Z0|TBRG4_HUMAN	TBRG4	TBRG4_HUMAN Protein TBRG4	28	5.90291	5.57976	6.46835	6.43063	6.45667	6.25719	6.8587	6.92836	6.09541	6.62523	1.08692	0.120247	0.0705263	0.0485403
sp|Q8N6Q8|MET25_HUMAN	METTL25	MET25_HUMAN Methyltransferase-like protein 25	2	5.82045	6.49586	6.24015	6.19573	6.10884	6.76671	7.31975	6.7079	6.18805	6.7258	1.0869	0.120222	0.0450026	0.073614
sp|P57764|GSDMD_HUMAN	GSDMD	GSDMD_HUMAN Gasdermin-D	7	6.43527	6.15928	6.35317	6.60467	6.58226	6.7308	7.57184	6.88776	6.3881	6.94317	1.08689	0.120207	0.0289645	0.0629806
sp|Q8WUM0|NU133_HUMAN	NUP133	NU133_HUMAN Nuclear pore complex protein Nup133	21	5.77654	5.5891	6.4685	6.46806	6.26953	6.38693	6.83146	6.92541	6.07555	6.60333	1.08687	0.120179	0.0756963	0.0489961
sp|Q14152|EIF3A_HUMAN	EIF3A	EIF3A_HUMAN Eukaryotic translation initiation factor 3 subunit A	71	6.1156	5.94465	6.15941	6.08455	6.67834	6.70078	6.6762	6.35566	6.07605	6.60275	1.08668	0.119932	0.0152777	0.0250045
sp|Q9BV44|THUM3_HUMAN	THUMPD3	THUM3_HUMAN THUMP domain-containing protein 3	14	5.92474	5.90484	6.12683	6.12952	6.29324	6.48483	6.75276	6.64223	6.02148	6.54326	1.08665	0.119892	0.020505	0.030516
sp|Q9BXJ9|NAA15_HUMAN	NAA15	NAA15_HUMAN N-alpha-acetyltransferase 15, NatA auxiliary subunit	70	5.65531	5.7281	6.23545	6.48265	6.20032	6.22113	6.82628	6.94128	6.02538	6.54725	1.08661	0.119838	0.0662857	0.0597971
sp|Q9GZU7|CTDS1_HUMAN	CTDSP1	CTDS1_HUMAN Carboxy-terminal domain RNA polymerase II polypeptide A small phosphatase 1	1	7.08972	5.63371	5.78088	5.69277	8.15042	4.92196	6.77947	6.43981	6.04927	6.57292	1.08656	0.119772	0.115099	0.201732
sp|Q19AV6|ZSWM7_HUMAN	ZSWIM7	ZSWM7_HUMAN Zinc finger SWIM domain-containing protein 7	1	5.69757	4.4866	6.94353	6.12871	6.54382	6.82186	6.17611	5.72678	5.8141	6.31714	1.08652	0.119716	0.176255	0.0750624
sp|O14735|CDIPT_HUMAN	CDIPT	CDIPT_HUMAN CDP-diacylglycerol--inositol 3-phosphatidyltransferase	4	5.76148	5.75837	6.44203	6.17386	6.30028	6.83206	6.33996	6.7487	6.03394	6.55525	1.0864	0.119552	0.0554874	0.0418151
sp|P53384|NUBP1_HUMAN	NUBP1	NUBP1_HUMAN Cytosolic Fe-S cluster assembly factor NUBP1	5	5.98847	6.31727	6.3329	6.13351	6.42718	6.59734	6.68765	7.19847	6.19304	6.72766	1.08633	0.119458	0.0264318	0.0493382
tr|E9PAU2|E9PAU2_HUMAN	RAVER1	E9PAU2_HUMAN Ribonucleoprotein PTB-binding 1	26	5.74994	5.97604	5.96389	6.31189	6.20632	6.45083	6.60021	6.81622	6.00044	6.51839	1.08632	0.119448	0.038689	0.0393474
tr|J3KQV4|J3KQV4_HUMAN	SLC35B1	J3KQV4_HUMAN Solute carrier family 35 member B1	2	6.00613	5.64378	6.57794	6.35972	5.47892	6.37314	7.36986	7.48745	6.14689	6.67734	1.0863	0.119417	0.0666828	0.141141
sp|Q8IV38|ANKY2_HUMAN	ANKMY2	ANKY2_HUMAN Ankyrin repeat and MYND domain-containing protein 2	15	5.76876	5.66027	6.24814	6.47669	6.23629	6.22744	6.8246	6.94922	6.03847	6.55939	1.08627	0.119379	0.0642651	0.0581783
sp|Q8N8Q9|NIPA2_HUMAN	NIPA2	NIPA2_HUMAN Magnesium transporter NIPA2	1	6.47176	5.5003	6.83457	6.42949	6.12857	6.68094	6.67753	7.92548	6.30903	6.85313	1.08624	0.119345	0.0901856	0.110982
tr|Q5TAL2|Q5TAL2_HUMAN	SNRPC	Q5TAL2_HUMAN U1 small nuclear ribonucleoprotein C	1	7.15042	7.23923	5.46221	5.16039	7.86381	7.39919	5.8067	6.09699	6.25306	6.79167	1.08614	0.119204	0.175116	0.146533
sp|P49591|SYSC_HUMAN	SARS	SYSC_HUMAN Serine--tRNA ligase, cytoplasmic	35	5.65514	5.83463	6.12499	6.2852	6.03282	6.34401	6.76022	6.81968	5.97499	6.48918	1.08606	0.1191	0.0474102	0.0571103
sp|O60701|UGDH_HUMAN	UGDH	UGDH_HUMAN UDP-glucose 6-dehydrogenase	26	5.63222	5.36296	5.99973	6.60622	5.80797	6.28271	6.74938	6.79117	5.90028	6.40781	1.08602	0.119047	0.0912072	0.0720298
sp|O75694|NU155_HUMAN	NUP155	NU155_HUMAN Nuclear pore complex protein Nup155	35	5.82049	5.63022	6.60695	6.74706	6.35139	6.47454	7.13612	6.97361	6.20118	6.73391	1.08591	0.118903	0.089957	0.0564062
sp|Q9NV35|NUD15_HUMAN	NUDT15	NUD15_HUMAN Probable 8-oxo-dGTP diphosphatase NUDT15	8	5.79224	5.2635	6.13407	6.41952	5.84734	6.19654	6.94059	6.65309	5.90233	6.40939	1.08591	0.118902	0.0842259	0.0755142
sp|Q5VW32|BROX_HUMAN	BROX	BROX_HUMAN BRO1 domain-containing protein BROX	12	5.59421	5.82034	6.27112	6.58093	6.27258	6.32056	6.83388	6.92306	6.06665	6.58752	1.08586	0.118835	0.0731098	0.0513842
sp|Q9NRN7|ADPPT_HUMAN	AASDHPPT	ADPPT_HUMAN L-aminoadipate-semialdehyde dehydrogenase-phosphopantetheinyl transferase	17	5.41293	5.49085	5.95227	6.55034	5.95569	6.09151	6.53858	6.83017	5.8516	6.35399	1.08586	0.118832	0.0893967	0.0634984
sp|P07099|HYEP_HUMAN	EPHX1	HYEP_HUMAN Epoxide hydrolase 1	20	5.39187	5.8949	6.08831	6.34484	5.95966	6.13857	6.7804	6.87751	5.92998	6.43904	1.08584	0.118817	0.0680116	0.0711048
sp|Q9H9Q4-2|NHEJ1_HUMAN	NHEJ1	NHEJ1_HUMAN Isoform 2 of Non-homologous end-joining factor 1	4	5.548	5.32643	6.44458	6.88938	5.5908	6.23473	7.54478	6.91593	6.0521	6.57156	1.08583	0.118801	0.122011	0.128555
sp|P50583|AP4A_HUMAN	NUDT2	AP4A_HUMAN Bis(5'-nucleosyl)-tetraphosphatase [asymmetrical]	9	5.84829	5.67512	6.26542	6.4215	6.52063	6.28837	6.57462	6.90434	6.05258	6.57199	1.08582	0.118779	0.0576779	0.0386482
sp|O14782|KIF3C_HUMAN	KIF3C	KIF3C_HUMAN Kinesin-like protein KIF3C	4	5.45304	5.60851	6.48115	6.47584	6.43881	5.59056	7.2933	6.75507	6.00464	6.51944	1.08573	0.11867	0.0917357	0.109315
sp|Q96GX8|CP074_HUMAN	C16orf74	CP074_HUMAN Uncharacterized protein C16orf74	2	6.57082	5.65764	4.8235	7.72773	6.79535	5.76557	7.52906	6.81385	6.19492	6.72596	1.08572	0.118653	0.201191	0.107893
sp|Q9Y262|EIF3L_HUMAN	EIF3L	EIF3L_HUMAN Eukaryotic translation initiation factor 3 subunit L	30	6.00758	5.89713	6.2671	6.32293	6.76353	6.32444	6.86117	6.64466	6.12369	6.64845	1.08569	0.118618	0.0333434	0.0351127
sp|Q96PM9|Z385A_HUMAN	ZNF385A	Z385A_HUMAN Zinc finger protein 385A	4	6.08457	5.59915	6.12081	6.24337	6.38284	6.77931	6.49365	6.45051	6.01197	6.52658	1.0856	0.118488	0.0471526	0.0267447
sp|P30291|WEE1_HUMAN	WEE1	WEE1_HUMAN Wee1-like protein kinase	1	6.07062	5.0494	5.1117	7.51512	6.99917	6.91073	5.64966	6.21941	5.93671	6.44474	1.08557	0.118459	0.193948	0.0984399
sp|O43776|SYNC_HUMAN	NARS	SYNC_HUMAN Asparagine--tRNA ligase, cytoplasmic	32	5.83696	5.59576	6.34794	6.5466	6.45483	6.15574	6.95334	6.8439	6.08182	6.60195	1.08552	0.118391	0.0724869	0.0554998
sp|Q969M7-2|UBE2F_HUMAN	UBE2F	UBE2F_HUMAN Isoform 2 of NEDD8-conjugating enzyme UBE2F	1	4.62607	4.84768	7.32041	6.45628	6.00515	6.39217	6.12095	6.71925	5.81261	6.30938	1.08546	0.118312	0.222695	0.0503627
sp|P26641|EF1G_HUMAN	EEF1G	EF1G_HUMAN Elongation factor 1-gamma	61	5.9557	5.80253	6.04791	6.37459	6.25103	6.51932	6.71096	6.76576	6.04518	6.56177	1.08545	0.118299	0.0399991	0.0354393
sp|O75529|TAF5L_HUMAN	TAF5L	TAF5L_HUMAN TAF5-like RNA polymerase II p300/CBP-associated factor-associated factor 65 kDa subunit 5L	1	5.52792	5.45361	7.31782	6.58137	7.15529	6.60039	7.53577	5.71525	6.22018	6.75168	1.08545	0.118289	0.143858	0.117085
sp|Q9P2S5|WRP73_HUMAN	WRAP73	WRP73_HUMAN WD repeat-containing protein WRAP73	1	6.61189	5.42469	6.58367	6.57019	6.34559	6.87074	7.10864	7.01785	6.29761	6.8357	1.08544	0.118286	0.0924487	0.0499042
sp|P41250|SYG_HUMAN	GARS	SYG_HUMAN Glycine--tRNA ligase	68	5.7954	5.81193	5.92627	6.23032	6.11854	6.30688	6.60935	6.75745	5.94098	6.44806	1.08535	0.118163	0.0339134	0.0447919
sp|Q9Y6X9|MORC2_HUMAN	MORC2	MORC2_HUMAN MORC family CW-type zinc finger protein 2	11	5.66496	5.57383	6.04438	6.37652	6.41074	6.25894	6.52648	6.48159	5.91492	6.41944	1.0853	0.118088	0.0623979	0.0182457
sp|Q7L1Q6-3|BZW1_HUMAN	BZW1	BZW1_HUMAN Isoform 3 of Basic leucine zipper and W2 domain-containing protein 1	36	5.99188	5.79944	6.41286	6.29385	6.39895	6.59589	6.89538	6.69731	6.12451	6.64688	1.08529	0.118084	0.0457066	0.0311203
sp|Q03468|ERCC6_HUMAN	ERCC6	ERCC6_HUMAN DNA excision repair protein ERCC-6	2	5.6694	5.39284	7.31388	5.59474	5.96686	6.04127	7.17254	6.83392	5.99272	6.50365	1.08526	0.118039	0.148262	0.09133
sp|Q96DP5|FMT_HUMAN	MTFMT	FMT_HUMAN Methionyl-tRNA formyltransferase, mitochondrial	7	6.12734	6.06244	6.56498	6.23033	6.38329	6.76332	7.13379	6.83486	6.24627	6.77881	1.08526	0.118038	0.0357707	0.0455343
sp|Q6ZS17-4|FA65A_HUMAN	FAM65A	FA65A_HUMAN Isoform 4 of Protein FAM65A	12	5.93913	5.89313	6.63141	6.18937	6.47752	6.5706	6.76131	6.9424	6.16326	6.68796	1.08513	0.117872	0.0548666	0.0309067
sp|Q9H0W8|SMG9_HUMAN	SMG9	SMG9_HUMAN Protein SMG9	8	5.69527	6.21903	6.12218	6.41277	6.24902	6.46104	6.95807	6.85949	6.11231	6.6319	1.08501	0.117705	0.0495953	0.0503104
sp|Q9NVU0|RPC5_HUMAN	POLR3E	RPC5_HUMAN DNA-directed RNA polymerase III subunit RPC5	6	6.24585	5.80407	6.11748	5.88498	6.42451	6.77835	6.44925	6.44341	6.01309	6.52388	1.08495	0.117622	0.0339705	0.0260543
sp|P52292|IMA1_HUMAN	KPNA2	IMA1_HUMAN Importin subunit alpha-1	17	5.93847	5.85475	6.19542	6.20939	6.40432	6.34505	6.78309	6.72008	6.04951	6.56313	1.0849	0.117567	0.0297411	0.0335892
sp|P19784|CSK22_HUMAN	CSNK2A2	CSK22_HUMAN Casein kinase II subunit alpha'	15	5.63519	5.47823	6.05934	6.28512	6.18414	6.05206	6.71614	6.49561	5.86447	6.36199	1.08484	0.117477	0.0635488	0.0472392
sp|O75386|TULP3_HUMAN	TULP3	TULP3_HUMAN Tubby-related protein 3	1	5.80382	5.45013	6.36204	6.83444	5.18654	6.76474	7.0662	7.50517	6.11261	6.63066	1.08475	0.117365	0.0998467	0.152263
sp|Q5BKT4|AG10A_HUMAN	ALG10	AG10A_HUMAN Dol-P-Glc:Glc(2)Man(9)GlcNAc(2)-PP-Dol alpha-1,2-glucosyltransferase	1	5.44044	5.89499	6.34067	5.81326	5.24639	5.50644	7.67212	7.05488	5.87234	6.36996	1.08474	0.117348	0.0629439	0.185147
sp|O76031|CLPX_HUMAN	CLPX	CLPX_HUMAN ATP-dependent Clp protease ATP-binding subunit clpX-like, mitochondrial	28	5.87851	5.73782	6.3423	6.33256	6.41986	6.40463	6.82766	6.69628	6.0728	6.58711	1.08469	0.117284	0.0512034	0.03173
sp|Q8N3X6|LCORL_HUMAN	LCORL	LCORL_HUMAN Ligand-dependent nuclear receptor corepressor-like protein	1	6.89478	4.87125	7.7116	5.50719	6.84746	6.54598	7.75276	5.95385	6.2462	6.77501	1.08466	0.117244	0.206781	0.110717
sp|Q3B726|RPA43_HUMAN	TWISTNB	RPA43_HUMAN DNA-directed RNA polymerase I subunit RPA43	5	5.83958	5.51259	6.32857	6.51012	6.24008	6.4449	6.62802	6.92558	6.04772	6.55964	1.08465	0.117228	0.0753138	0.0443472
sp|Q9Y375|CIA30_HUMAN	NDUFAF1	CIA30_HUMAN Complex I intermediate-associated protein 30, mitochondrial	6	5.46492	5.63597	6.17941	6.39746	6.14056	6.36442	6.63067	6.54639	5.91944	6.42051	1.08465	0.117227	0.074474	0.0338295
sp|Q9Y232|CDYL1_HUMAN	CDYL	CDYL1_HUMAN Chromodomain Y-like protein	10	5.99745	5.90842	6.03641	6.26518	6.11536	7.1977	6.65395	6.28529	6.05187	6.56308	1.08447	0.116992	0.0251104	0.0729998
sp|Q9NVQ4-2|FAIM1_HUMAN	FAIM	FAIM1_HUMAN Isoform 2 of Fas apoptotic inhibitory molecule 1	3	5.43975	5.97283	5.64528	6.48921	6.09676	6.39385	6.4862	6.55718	5.88677	6.3835	1.08438	0.116871	0.0777517	0.031725
sp|P51157|RAB28_HUMAN	RAB28	RAB28_HUMAN Ras-related protein Rab-28	1	6.45863	4.64247	6.28948	6.67652	6.09095	6.53316	7.42843	6.04237	6.01677	6.52373	1.08426	0.116706	0.154535	0.0984532
sp|Q96JB2|COG3_HUMAN	COG3	COG3_HUMAN Conserved oligomeric Golgi complex subunit 3	16	6.0228	5.63863	6.29224	6.55579	6.15083	6.57247	7.03213	6.81885	6.12736	6.64357	1.08425	0.116692	0.0639431	0.0569567
sp|P67870|CSK2B_HUMAN	CSNK2B	CSK2B_HUMAN Casein kinase II subunit beta	21	6.20387	6.16286	5.84475	5.76584	6.47549	6.87078	6.43159	6.21703	5.99433	6.49872	1.08414	0.116558	0.0369145	0.0419365
sp|P11182|ODB2_HUMAN	DBT	ODB2_HUMAN Lipoamide acyltransferase component of branched-chain alpha-keto acid dehydrogenase complex, mitochondrial	12	5.86098	5.72807	6.34106	6.38965	6.16977	6.67105	6.87097	6.65282	6.07994	6.59115	1.08408	0.116474	0.0550325	0.0451812
sp|Q9H490|PIGU_HUMAN	PIGU	PIGU_HUMAN Phosphatidylinositol glycan anchor biosynthesis class U protein	4	6.01524	5.83404	6.30928	6.7574	6.35808	6.74334	6.74501	7.16285	6.22899	6.75232	1.08402	0.116385	0.0647049	0.0486768
sp|Q15742|NAB2_HUMAN	NAB2	NAB2_HUMAN NGFI-A-binding protein 2	13	5.51522	5.77431	6.17	6.46204	6.32681	6.29508	6.68368	6.62533	5.98039	6.48273	1.084	0.11636	0.0700695	0.030882
sp|Q8TCB7|METL6_HUMAN	METTL6	METL6_HUMAN Methyltransferase-like protein 6	1	5.38118	6.23972	5.92979	7.00686	6.24736	6.36934	7.00507	6.99819	6.13939	6.65499	1.08398	0.116342	0.110528	0.0606103
sp|P81274|GPSM2_HUMAN	GPSM2	GPSM2_HUMAN G-protein-signaling modulator 2	3	5.23194	6.02015	5.23416	6.72318	6.2999	6.26216	6.22331	6.36821	5.80236	6.2884	1.08377	0.116053	0.123623	0.0098145
sp|Q00325|MPCP_HUMAN	SLC25A3	MPCP_HUMAN Phosphate carrier protein, mitochondrial	39	6.00171	5.76358	6.37826	6.38378	6.35579	6.40104	6.95298	6.87195	6.13183	6.64544	1.08376	0.116046	0.0495324	0.0467468
sp|Q9UNH7|SNX6_HUMAN	SNX6	SNX6_HUMAN Sorting nexin-6	24	5.82076	5.59216	6.12129	6.29367	6.13709	5.84769	6.97289	6.86598	5.95697	6.45591	1.08376	0.116042	0.0523734	0.0851699
sp|Q00610|CLH1_HUMAN	CLTC	CLH1_HUMAN Clathrin heavy chain 1	166	5.65956	5.66209	6.14136	6.36653	6.1404	6.04908	6.81574	6.81889	5.95739	6.45603	1.0837	0.115968	0.0595166	0.0648763
sp|P06746|DPOLB_HUMAN	POLB	DPOLB_HUMAN DNA polymerase beta	11	5.36563	5.94631	6.16533	6.43308	6.10186	6.4242	6.87367	6.50819	5.97759	6.47698	1.08354	0.115758	0.0759407	0.0489726
sp|P27797|CALR_HUMAN	CALR	CALR_HUMAN Calreticulin	81	5.66941	5.66062	5.97601	6.35589	6.11379	6.23648	6.62711	6.66118	5.91548	6.40964	1.08354	0.115747	0.0554801	0.0430176
sp|Q9BQI3|E2AK1_HUMAN	EIF2AK1	E2AK1_HUMAN Eukaryotic translation initiation factor 2-alpha kinase 1	4	5.54765	5.48443	6.33783	6.42214	6.36279	5.90804	6.84266	6.66526	5.94801	6.44469	1.0835	0.115703	0.0841711	0.0634561
sp|P26196|DDX6_HUMAN	DDX6	DDX6_HUMAN Probable ATP-dependent RNA helicase DDX6	37	5.85119	5.80386	6.10282	6.18329	6.26642	6.29651	6.68158	6.69519	5.98529	6.48492	1.08348	0.115669	0.0310955	0.0362875
sp|Q12851|M4K2_HUMAN	MAP4K2	M4K2_HUMAN Mitogen-activated protein kinase kinase kinase kinase 2	1	5.50145	6.67678	6.84011	5.34327	7.67827	6.35508	6.00318	6.35807	6.0904	6.59865	1.08345	0.115633	0.12757	0.111959
sp|P07948|LYN_HUMAN	LYN	LYN_HUMAN Tyrosine-protein kinase Lyn	8	5.98585	5.96678	6.32673	6.64501	6.83964	6.63852	6.97042	6.55393	6.23109	6.75063	1.08338	0.115536	0.0516287	0.0280401
sp|Q9NYG2-2|ZDHC3_HUMAN	ZDHHC3	ZDHC3_HUMAN Isoform 2 of Palmitoyltransferase ZDHHC3	2	5.68135	5.55975	6.10658	6.01139	5.99665	6.50491	6.30157	6.50347	5.83977	6.32665	1.08337	0.115531	0.0446702	0.0379096
sp|Q9H8H3|MET7A_HUMAN	METTL7A	MET7A_HUMAN Methyltransferase-like protein 7A	1	5.35346	5.06629	7.40811	7.22185	6.5085	6.76341	6.65706	7.20842	6.26243	6.78435	1.08334	0.115488	0.195354	0.0444294
tr|Q5QPI9|Q5QPI9_HUMAN	ENTPD6	Q5QPI9_HUMAN Ectonucleoside triphosphate diphosphohydrolase 6	5	6.27107	6.23217	6.34842	5.91553	6.70628	6.60764	6.55501	6.9614	6.1918	6.70758	1.0833	0.115435	0.030752	0.0269031
sp|P46060|RAGP1_HUMAN	RANGAP1	RAGP1_HUMAN Ran GTPase-activating protein 1	41	5.97309	5.9152	6.16916	6.48155	6.29666	6.59817	6.81459	6.87329	6.13475	6.64568	1.08328	0.115412	0.0416426	0.0392781
sp|Q7Z6M2|FBX33_HUMAN	FBXO33	FBX33_HUMAN F-box only protein 33	2	5.79247	5.04956	6.38411	6.62292	6.02158	6.53137	7.00736	6.27487	5.96227	6.4588	1.08328	0.115405	0.117656	0.0651489
sp|O94953|KDM4B_HUMAN	KDM4B	KDM4B_HUMAN Lysine-specific demethylase 4B	7	5.76463	5.59826	6.21299	6.17088	6.34652	6.18461	6.46233	6.72959	5.93669	6.43076	1.08322	0.115331	0.0510292	0.0356846
sp|Q8WYK2-2|JDP2_HUMAN	JDP2	JDP2_HUMAN Isoform 2 of Jun dimerization protein 2	1	5.43793	7.21962	4.92352	6.03143	5.91956	6.36948	5.96368	7.32166	5.90313	6.39359	1.08309	0.115148	0.16729	0.101821
sp|Q14204|DYHC1_HUMAN	DYNC1H1	DYHC1_HUMAN Cytoplasmic dynein 1 heavy chain 1	206	5.88386	5.66476	6.42672	6.52818	6.40885	6.31994	7.07354	6.73376	6.12588	6.63402	1.08295	0.114967	0.0681949	0.0516685
sp|Q9NQE9|HINT3_HUMAN	HINT3	HINT3_HUMAN Histidine triad nucleotide-binding protein 3	4	5.75404	5.6456	6.53449	6.34782	6.34889	5.91197	7.32662	6.70814	6.07049	6.5739	1.08293	0.114938	0.0719859	0.0909902
sp|Q9Y6D6|BIG1_HUMAN	ARFGEF1	BIG1_HUMAN Brefeldin A-inhibited guanine nucleotide-exchange protein 1	18	6.04158	5.95417	6.5884	6.37974	6.39186	6.80717	7.05578	6.77814	6.24097	6.75824	1.08288	0.114876	0.0473497	0.0405725
sp|Q8NEZ3|WDR19_HUMAN	WDR19	WDR19_HUMAN WD repeat-containing protein 19	2	5.62402	5.7567	6.58509	6.55851	6.59883	6.24024	7.21722	6.50044	6.13108	6.63918	1.08287	0.114864	0.0834909	0.0623554
sp|P55011|S12A2_HUMAN	SLC12A2	S12A2_HUMAN Solute carrier family 12 member 2	33	5.72301	5.87966	6.05867	6.31785	6.1729	6.57923	6.65107	6.56051	5.9948	6.49093	1.08276	0.114714	0.0425906	0.0332127
sp|Q86XP1|DGKH_HUMAN	DGKH	DGKH_HUMAN Diacylglycerol kinase eta	5	5.59532	5.47356	6.09877	6.76643	6.25212	6.23099	6.76116	6.66841	5.98352	6.47817	1.08267	0.114592	0.0982584	0.0425993
sp|Q7L2K0|CP059_HUMAN	C16orf59	CP059_HUMAN Uncharacterized protein C16orf59	1	4.79771	7.3571	5.53332	6.62499	6.83599	6.57241	5.58081	7.33297	6.07828	6.58054	1.08263	0.114544	0.186886	0.112046
sp|P51965|UB2E1_HUMAN	UBE2E1	UB2E1_HUMAN Ubiquitin-conjugating enzyme E2 E1	2	5.78598	5.47337	6.06898	6.23206	5.42937	6.56035	6.80138	6.71544	5.8901	6.37664	1.0826	0.114504	0.0566012	0.100263
sp|Q99961|SH3G1_HUMAN	SH3GL1	SH3G1_HUMAN Endophilin-A2	22	5.7837	5.78367	5.97048	6.3847	5.93092	6.10816	6.76452	7.09458	5.98064	6.47454	1.08258	0.11448	0.0473866	0.0845161
sp|Q9NPA3|M1IP1_HUMAN	MID1IP1	M1IP1_HUMAN Mid1-interacting protein 1	9	5.41226	5.63371	5.73669	6.48415	6.20629	6.0005	6.39272	6.58783	5.8167	6.29683	1.08254	0.114425	0.079959	0.0399542
sp|P24539|AT5F1_HUMAN	ATP5F1	AT5F1_HUMAN ATP synthase F(0) complex subunit B1, mitochondrial	15	5.4573	5.52747	6.4792	6.32537	6.04649	5.80794	6.88767	7.01049	5.94733	6.43815	1.08253	0.114402	0.0890897	0.0932033
tr|J3QKT4|J3QKT4_HUMAN	PYCR1	J3QKT4_HUMAN Pyrroline-5-carboxylate reductase (Fragment)	1	5.98728	6.5185	4.90211	6.52208	6.57895	7.76573	6.25511	5.30427	5.98249	6.47601	1.08249	0.11436	0.12751	0.156861
sp|Q15386|UBE3C_HUMAN	UBE3C	UBE3C_HUMAN Ubiquitin-protein ligase E3C	16	5.79519	5.62006	6.68096	6.57439	6.51034	6.54687	7.11601	6.52969	6.16765	6.67573	1.08238	0.114204	0.0871878	0.0440253
sp|Q8IZE3-2|PACE1_HUMAN	SCYL3	PACE1_HUMAN Isoform 2 of Protein-associating with the carboxyl-terminal domain of ezrin	6	5.82169	5.34644	6.02312	6.72223	6.4337	6.635	6.42764	6.38664	5.97837	6.47074	1.08236	0.11418	0.0955643	0.0172284
sp|P52333|JAK3_HUMAN	JAK3	JAK3_HUMAN Tyrosine-protein kinase JAK3	2	5.49556	5.87309	6.75723	5.91753	5.94057	6.4426	7.39575	6.2446	6.01085	6.50588	1.08236	0.114175	0.0885702	0.0965511
sp|P54277|PMS1_HUMAN	PMS1	PMS1_HUMAN PMS1 protein homolog 1	6	5.80575	5.59762	6.25511	6.62908	6.74766	6.44542	6.61086	6.48226	6.07189	6.57155	1.08229	0.114088	0.0760563	0.0208723
sp|Q9BTE3-2|MCMBP_HUMAN	MCMBP	MCMBP_HUMAN Isoform 2 of Mini-chromosome maintenance complex-binding protein	1	5.27848	6.35678	5.69916	7.50302	8.19818	5.73614	7.61816	5.32863	6.20936	6.72028	1.08228	0.114076	0.1562	0.208601
sp|Q9Y265|RUVB1_HUMAN	RUVBL1	RUVB1_HUMAN RuvB-like 1	53	5.7276	5.74376	6.14534	6.39584	6.25635	6.22107	6.81739	6.69287	6.00314	6.49692	1.08225	0.11404	0.0542032	0.0466068
sp|Q8WUM4|PDC6I_HUMAN	PDCD6IP	PDC6I_HUMAN Programmed cell death 6-interacting protein	59	5.97126	5.82871	6.18408	6.41334	6.35827	6.32026	6.86315	6.86006	6.09935	6.60044	1.08215	0.113906	0.0418449	0.0457507
sp|Q6NSZ9|ZSC25_HUMAN	ZSCAN25	ZSC25_HUMAN Zinc finger and SCAN domain-containing protein 25	1	6.21613	5.68878	6.25902	7.18216	5.66828	8.03045	7.82204	5.90725	6.33652	6.85701	1.08214	0.113887	0.0979292	0.181044
sp|Q9UK41|VPS28_HUMAN	VPS28	VPS28_HUMAN Vacuolar protein sorting-associated protein 28 homolog	10	5.84694	5.91172	6.13742	6.15915	6.00111	6.03511	6.3372	7.65718	6.01381	6.50765	1.08212	0.113858	0.0262341	0.120028
sp|Q6PKC3|TXD11_HUMAN	TXNDC11	TXD11_HUMAN Thioredoxin domain-containing protein 11	3	5.7247	5.90326	6.25072	6.26366	6.62355	6.39129	6.64253	6.46477	6.03559	6.53054	1.08201	0.113708	0.0440919	0.0187351
sp|Q15119|PDK2_HUMAN	PDK2	PDK2_HUMAN [Pyruvate dehydrogenase (acetyl-transferring)] kinase isozyme 2, mitochondrial	5	5.50273	5.70599	6.64976	6.62985	6.00466	5.98558	7.40153	7.10347	6.12208	6.62381	1.08195	0.113639	0.098594	0.111132
sp|Q6PIJ6|FBX38_HUMAN	FBXO38	FBX38_HUMAN F-box only protein 38	9	6.01731	5.39869	6.30918	6.27823	6.05962	6.35136	6.79666	6.76274	6.00085	6.49259	1.08195	0.113628	0.0703643	0.0542984
sp|P08238|HS90B_HUMAN	HSP90AB1	HS90B_HUMAN Heat shock protein HSP 90-beta	125	5.84028	5.75588	6.02412	6.12904	6.16113	6.18599	6.68056	6.66562	5.93733	6.42333	1.08185	0.113506	0.0286205	0.0449373
sp|A3KN83|SBNO1_HUMAN	SBNO1	SBNO1_HUMAN Protein strawberry notch homolog 1	29	5.56336	5.69257	6.12193	6.47326	5.9255	6.25616	6.88962	6.73101	5.96278	6.45057	1.08181	0.113442	0.0697191	0.0684516
sp|Q96KA5|CLP1L_HUMAN	CLPTM1L	CLP1L_HUMAN Cleft lip and palate transmembrane protein 1-like protein	11	5.90288	5.92704	6.38098	6.38654	6.33635	6.54604	6.72679	7.00006	6.14936	6.65231	1.08179	0.113419	0.0440454	0.042305
sp|Q9UNT1-2|RBL2B_HUMAN	RABL2B	RBL2B_HUMAN Isoform 2 of Rab-like protein 2B	3	6.2514	5.59127	6.6354	6.51967	6.69784	6.44119	6.81847	7.08199	6.24944	6.75987	1.08168	0.11327	0.0747789	0.0393806
sp|P33993|MCM7_HUMAN	MCM7	MCM7_HUMAN DNA replication licensing factor MCM7	37	5.92769	5.71581	6.38212	6.29652	6.38873	6.249	6.92691	6.74248	6.08054	6.57678	1.08161	0.113183	0.0514829	0.047506
sp|Q9UBD5-2|ORC3_HUMAN	ORC3	ORC3_HUMAN Isoform 2 of Origin recognition complex subunit 3	11	5.93749	5.8167	6.59952	6.30062	6.59519	6.37493	6.99752	6.69827	6.16358	6.66648	1.08159	0.113156	0.057763	0.0387969
sp|P41252|SYIC_HUMAN	IARS	SYIC_HUMAN Isoleucine--tRNA ligase, cytoplasmic	71	5.98097	5.68239	6.4495	6.45674	6.49517	6.21864	7.11724	6.74311	6.1424	6.64354	1.08159	0.11315	0.0616927	0.0574395
sp|Q53RE8|ANR39_HUMAN	ANKRD39	ANR39_HUMAN Ankyrin repeat domain-containing protein 39	1	6.41982	5.2186	6.15042	5.98476	6.29565	7.09627	5.94288	6.37729	5.9434	6.42802	1.08154	0.113086	0.0867163	0.0752549
sp|O00505|IMA4_HUMAN	KPNA3	IMA4_HUMAN Importin subunit alpha-4	8	5.8816	5.76251	6.10436	6.46759	6.53915	6.38712	6.77771	6.48514	6.05401	6.54728	1.08148	0.113003	0.051204	0.0253554
sp|Q9H0P0|5NT3A_HUMAN	NT5C3A	5NT3A_HUMAN Cytosolic 5'-nucleotidase 3A	13	5.59321	5.77788	6.03969	6.63035	6.19011	5.89783	6.86864	7.04257	6.01028	6.49979	1.08144	0.11296	0.0752288	0.0837473
sp|Q14790-4|CASP8_HUMAN	CASP8	CASP8_HUMAN Isoform 4 of Caspase-8	10	5.69036	5.99185	6.43504	6.38807	6.19334	6.31401	6.94356	7.04839	6.12633	6.62483	1.08137	0.112859	0.0574764	0.0654367
sp|P09884|DPOLA_HUMAN	POLA1	DPOLA_HUMAN DNA polymerase alpha catalytic subunit	35	5.83214	5.79322	6.44383	6.5279	6.39937	6.56261	6.90139	6.73455	6.14927	6.64948	1.08134	0.112826	0.0635033	0.0325798
sp|Q93009|UBP7_HUMAN	USP7	UBP7_HUMAN Ubiquitin carboxyl-terminal hydrolase 7	67	5.80064	5.77809	6.16974	6.44328	6.21671	6.29934	6.85129	6.79219	6.04794	6.53988	1.08134	0.112821	0.0527299	0.050168
sp|P21283|VATC1_HUMAN	ATP6V1C1	VATC1_HUMAN V-type proton ATPase subunit C 1	15	6.11798	5.73736	6.3283	6.5188	6.4859	6.33431	7.10419	6.78595	6.17561	6.67759	1.08128	0.112745	0.0542298	0.0510277
sp|O43847-2|NRDC_HUMAN	NRD1	NRDC_HUMAN Isoform 2 of Nardilysin	38	5.94588	5.89386	6.16064	6.33938	6.10408	6.26089	6.96686	6.98613	6.08494	6.57949	1.08127	0.112733	0.0337224	0.0703606
sp|Q9H2K2|TNKS2_HUMAN	TNKS2	TNKS2_HUMAN Tankyrase-2	2	5.86381	6.44134	5.96484	5.27018	6.08867	6.76564	6.48109	6.11682	5.88504	6.36306	1.08122	0.112667	0.0817478	0.0506756
sp|Q9Y679|AUP1_HUMAN	AUP1	AUP1_HUMAN Ancient ubiquitous protein 1	9	6.12533	5.77068	6.5827	6.65343	6.38954	6.5882	7.08428	7.11125	6.28303	6.79332	1.08122	0.112655	0.0659034	0.0531328
sp|Q8IYL2|TRM44_HUMAN	TRMT44	TRM44_HUMAN Probable tRNA (uracil-O(2)-)-methyltransferase	2	6.00618	5.70379	6.75953	5.81848	6.62164	6.67277	6.51936	6.44603	6.07199	6.56495	1.08119	0.112613	0.0782283	0.015499
sp|P30260-2|CDC27_HUMAN	CDC27	CDC27_HUMAN Isoform 2 of Cell division cycle protein 27 homolog	19	5.80725	5.83055	6.46161	6.1333	6.35366	6.40764	6.88154	6.55605	6.05818	6.54972	1.08114	0.11255	0.0507141	0.0362131
sp|Q9UNM6|PSD13_HUMAN	PSMD13	PSD13_HUMAN 26S proteasome non-ATPase regulatory subunit 13	39	6.14595	5.8506	6.07649	6.21892	6.57153	6.2249	6.65763	6.80845	6.07299	6.56563	1.08112	0.112526	0.0262238	0.0376746
sp|Q8IYQ7|THNS1_HUMAN	THNSL1	THNS1_HUMAN Threonine synthase-like 1	10	5.86364	5.93586	6.35718	6.73128	6.12301	6.659	7.23372	6.89057	6.22199	6.72657	1.0811	0.112496	0.0648175	0.0693561
sp|P46940|IQGA1_HUMAN	IQGAP1	IQGA1_HUMAN Ras GTPase-activating-like protein IQGAP1	121	5.94315	5.83341	6.25307	6.27114	6.52653	6.33026	6.76033	6.65293	6.07519	6.56751	1.08104	0.112417	0.0363037	0.0281371
sp|Q9UBU9|NXF1_HUMAN	NXF1	NXF1_HUMAN Nuclear RNA export factor 1	13	5.74059	6.10492	6.13359	6.16378	6.32312	6.31532	6.76294	6.69773	6.03572	6.52478	1.08103	0.112403	0.0328404	0.0366092
sp|Q8IWT6|LRC8A_HUMAN	LRRC8A	LRC8A_HUMAN Leucine-rich repeat-containing protein 8A	9	5.74472	5.99364	6.59192	6.62825	6.06985	6.31495	8.08645	6.50952	6.23963	6.74519	1.08102	0.112399	0.0705037	0.13522
sp|Q14139-2|UBE4A_HUMAN	UBE4A	UBE4A_HUMAN Isoform 2 of Ubiquitin conjugation factor E4 A	17	5.82727	5.52361	6.31838	6.49156	6.23142	6.19798	6.76999	6.91897	6.04021	6.52959	1.08102	0.112395	0.0736258	0.0564979
sp|Q13509|TBB3_HUMAN	TUBB3	TBB3_HUMAN Tubulin beta-3 chain	96	5.64884	5.7486	6.1835	6.54049	6.20789	6.46849	6.71135	6.68767	6.03036	6.51885	1.08101	0.112374	0.0682806	0.0359527
sp|Q96Q83|ALKB3_HUMAN	ALKBH3	ALKB3_HUMAN Alpha-ketoglutarate-dependent dioxygenase alkB homolog 3	3	5.52143	6.22675	5.69059	6.05385	6.34755	6.57636	5.9012	6.57016	5.87315	6.34882	1.08099	0.112352	0.0551481	0.0499027
sp|P24928|RPB1_HUMAN	POLR2A	RPB1_HUMAN DNA-directed RNA polymerase II subunit RPB1	35	5.99589	5.89894	6.26909	6.42419	6.49501	6.54485	6.82386	6.71449	6.14703	6.64455	1.08094	0.112283	0.0394152	0.0228815
sp|Q8NBI6|XXLT1_HUMAN	XXYLT1	XXLT1_HUMAN Xyloside xylosyltransferase 1	7	5.35186	5.78125	6.34934	6.37654	6.21666	6.35084	6.58454	6.63029	5.96475	6.44558	1.08061	0.11185	0.0825184	0.0303503
sp|Q96QT4|TRPM7_HUMAN	TRPM7	TRPM7_HUMAN Transient receptor potential cation channel subfamily M member 7	4	5.8088	6.06196	6.5644	6.31577	6.86515	6.32688	6.67043	6.88369	6.18773	6.68654	1.08061	0.111849	0.05259	0.0386518
sp|Q8IXM3|RM41_HUMAN	MRPL41	RM41_HUMAN 39S ribosomal protein L41, mitochondrial	10	5.42809	5.13177	6.3639	6.5728	6.03198	5.74292	6.81473	6.80013	5.87414	6.34744	1.08057	0.111797	0.119493	0.0857251
sp|Q16774-3|KGUA_HUMAN	GUK1	KGUA_HUMAN Isoform 3 of Guanylate kinase	4	5.50169	5.44326	6.23766	6.96032	5.45949	6.0611	7.43635	7.12701	6.03573	6.52099	1.0804	0.111562	0.118391	0.1412
sp|Q99758|ABCA3_HUMAN	ABCA3	ABCA3_HUMAN ATP-binding cassette sub-family A member 3	1	4.08036	5.91627	7.07341	7.07992	7.69347	4.64118	8.2739	5.48295	6.03749	6.52287	1.0804	0.111559	0.234333	0.266398
sp|P78347|GTF2I_HUMAN	GTF2I	GTF2I_HUMAN General transcription factor II-I	60	5.84064	5.82853	6.05379	6.23508	6.26445	6.23133	6.61551	6.76708	5.98951	6.46959	1.08015	0.111237	0.0323333	0.0407629
sp|Q16831|UPP1_HUMAN	UPP1	UPP1_HUMAN Uridine phosphorylase 1	4	5.76632	5.9504	6.00195	6.46634	6.29049	6.35353	6.56864	6.91083	6.04625	6.53087	1.08015	0.111235	0.0492473	0.0428576
tr|I3L2L3|I3L2L3_HUMAN	ABR	I3L2L3_HUMAN Active breakpoint cluster region-related protein (Fragment)	1	6.37434	6.65466	5.09754	6.59461	5.79906	4.67835	9.19048	7.03452	6.18029	6.6756	1.08014	0.111224	0.118412	0.289579
sp|Q9BSJ8-2|ESYT1_HUMAN	ESYT1	ESYT1_HUMAN Isoform 2 of Extended synaptotagmin-1	31	5.83675	5.98255	6.07072	6.27163	6.25159	6.37776	6.76687	6.7009	6.04041	6.52428	1.08011	0.111172	0.0301053	0.0381517
sp|P62333|PRS10_HUMAN	PSMC6	PRS10_HUMAN 26S protease regulatory subunit 10B	36	5.96424	5.99466	6.33149	6.27666	6.47911	6.34808	6.89425	6.81191	6.14176	6.63334	1.08004	0.111082	0.0307994	0.0394197
sp|Q9Y6W3|CAN7_HUMAN	CAPN7	CAN7_HUMAN Calpain-7	7	5.63729	6.10334	6.5093	6.37173	6.49649	6.31096	6.93607	6.84753	6.15541	6.64776	1.07999	0.111013	0.0624422	0.0442288
sp|Q9ULC5-3|ACSL5_HUMAN	ACSL5	ACSL5_HUMAN Isoform 2 of Long-chain-fatty-acid--CoA ligase 5	34	6.07525	5.822	6.32951	6.43799	6.46885	6.38827	6.94926	6.82853	6.16619	6.65873	1.07988	0.110868	0.0446384	0.0408938
sp|O00203|AP3B1_HUMAN	AP3B1	AP3B1_HUMAN AP-3 complex subunit beta-1	41	5.88638	5.79575	6.31393	6.3468	6.5047	6.27488	6.77496	6.73269	6.08572	6.57181	1.07987	0.110863	0.0468681	0.0351216
sp|Q7Z5L2-2|R3HCL_HUMAN	R3HCC1L	R3HCL_HUMAN Isoform 2 of Coiled-coil domain-containing protein R3HCC1L	5	5.53835	5.85913	6.66614	5.90448	6.11237	6.7279	6.39061	6.65144	5.99202	6.47058	1.07987	0.110851	0.07978	0.0431284
sp|O60563|CCNT1_HUMAN	CCNT1	CCNT1_HUMAN Cyclin-T1	5	5.83965	5.4216	6.57849	6.32826	6.18746	6.61793	6.78954	6.50317	6.042	6.52452	1.07986	0.110847	0.0852331	0.0388775
sp|O75083|WDR1_HUMAN	WDR1	WDR1_HUMAN WD repeat-containing protein 1	54	5.89909	5.86852	6.1171	6.36614	6.34632	6.35905	6.72644	6.75479	6.06271	6.54665	1.07982	0.110793	0.0380334	0.0342665
sp|P07947|YES_HUMAN	YES1	YES_HUMAN Tyrosine-protein kinase Yes	15	5.74128	5.78031	6.08589	6.52964	6.07382	6.27732	7.04469	6.66766	6.03428	6.51587	1.07981	0.110777	0.0603908	0.0660108
sp|Q9NQG6|MID51_HUMAN	MIEF1	MID51_HUMAN Mitochondrial dynamics protein MID51	3	5.61051	5.59319	6.35897	6.77026	6.44232	5.91267	6.83911	7.08033	6.08323	6.56861	1.07979	0.110749	0.0954595	0.0776885
sp|O43264|ZW10_HUMAN	ZW10	ZW10_HUMAN Centromere/kinetochore protein zw10 homolog	12	5.87056	6.06936	6.33927	6.4034	6.34343	6.47164	6.88209	6.95378	6.17065	6.66273	1.07975	0.110693	0.0400164	0.0451346
sp|Q96HW7|INT4_HUMAN	INTS4	INT4_HUMAN Integrator complex subunit 4	20	6.02751	5.83995	6.47212	6.41647	6.40309	6.6168	6.86048	6.84985	6.18901	6.68255	1.07974	0.110691	0.0493461	0.0325647
sp|Q8WZ82|OVCA2_HUMAN	OVCA2	OVCA2_HUMAN Ovarian cancer-associated gene 2 protein	2	5.58998	5.11142	6.80749	6.44093	5.6165	5.8141	7.22085	7.20757	5.98746	6.46476	1.07972	0.110653	0.129496	0.134447
sp|Q9H871|RMD5A_HUMAN	RMND5A	RMD5A_HUMAN Protein RMD5 homolog A	8	5.98172	5.95667	6.36659	6.4583	6.40117	6.34569	6.99924	6.98987	6.19082	6.68399	1.07966	0.11058	0.0418098	0.0537615
sp|P78371|TCPB_HUMAN	CCT2	TCPB_HUMAN T-complex protein 1 subunit beta	101	5.61565	5.61999	6.13709	6.23412	6.12729	6.11351	6.62468	6.62131	5.90171	6.3717	1.07964	0.110544	0.0559499	0.0455501
sp|O75934|SPF27_HUMAN	BCAS2	SPF27_HUMAN Pre-mRNA-splicing factor SPF27	7	6.01133	6.01058	6.18236	6.02629	6.53064	7.29955	6.56123	5.7683	6.05764	6.53993	1.07962	0.110519	0.0137778	0.0956116
sp|Q15185|TEBP_HUMAN	PTGES3	TEBP_HUMAN Prostaglandin E synthase 3	32	5.94042	6.13238	5.80863	6.02952	6.3178	6.32428	6.50776	6.66351	5.97774	6.45334	1.07956	0.110446	0.022975	0.0256441
sp|Q9BVI4|NOC4L_HUMAN	NOC4L	NOC4L_HUMAN Nucleolar complex protein 4 homolog	9	5.53807	5.33126	6.94357	6.5539	6.74879	6.13454	6.70908	6.71235	6.0917	6.57619	1.07953	0.110407	0.128004	0.0448562
sp|P09417|DHPR_HUMAN	QDPR	DHPR_HUMAN Dihydropteridine reductase	11	5.43206	5.05431	6.03159	6.48457	5.8408	5.97915	6.40981	6.59854	5.75063	6.20707	1.07937	0.110193	0.110161	0.0573724
sp|P78314-3|3BP2_HUMAN	SH3BP2	3BP2_HUMAN Isoform 3 of SH3 domain-binding protein 2	1	6.42979	5.74978	6.5649	5.43544	4.69524	7.17039	7.61381	6.61735	6.04498	6.5242	1.07928	0.110063	0.0894466	0.197057
sp|O00471|EXOC5_HUMAN	EXOC5	EXOC5_HUMAN Exocyst complex component 5	14	6.04866	5.76091	6.55794	6.57119	6.68751	6.30938	7.09737	6.82076	6.23468	6.72875	1.07925	0.110025	0.0639429	0.048683
sp|Q99471|PFD5_HUMAN	PFDN5	PFD5_HUMAN Prefoldin subunit 5	19	6.39507	6.51436	5.85505	5.76315	6.66802	7.1208	6.06831	6.61415	6.13191	6.61782	1.07924	0.11002	0.0616091	0.0651389
sp|P26440|IVD_HUMAN	IVD	IVD_HUMAN Isovaleryl-CoA dehydrogenase, mitochondrial	16	6.00072	5.99151	5.72402	6.07052	6.41429	6.60932	6.25167	6.39396	5.94669	6.41731	1.07914	0.109881	0.0256583	0.0229124
sp|P41227|NAA10_HUMAN	NAA10	NAA10_HUMAN N-alpha-acetyltransferase 10	24	5.82	5.5324	6.11523	6.37984	5.93418	6.29441	6.81303	6.69276	5.96187	6.4336	1.07912	0.109861	0.0614605	0.0621688
sp|O43681|ASNA_HUMAN	ASNA1	ASNA_HUMAN ATPase ASNA1	17	6.08377	5.80591	5.88854	6.11198	6.34774	6.46779	6.47548	6.48912	5.97255	6.44503	1.07911	0.109841	0.0249539	0.0101564
sp|Q9UJT0|TBE_HUMAN	TUBE1	TBE_HUMAN Tubulin epsilon chain	4	5.39341	5.84033	6.33508	6.35316	6.54384	6.16707	6.3828	6.71972	5.9805	6.45336	1.07907	0.109785	0.0765599	0.0364591
sp|Q13616|CUL1_HUMAN	CUL1	CUL1_HUMAN Cullin-1	51	5.79132	5.77883	6.08129	6.29578	6.13654	6.18288	6.84292	6.67803	5.98681	6.46009	1.07906	0.109769	0.0415756	0.0547716
sp|Q6IPR3|TYW3_HUMAN	TYW3	TYW3_HUMAN tRNA wybutosine-synthesizing protein 3 homolog	2	5.51329	5.73406	6.9234	5.65333	6.13859	5.82799	7.08472	6.65515	5.95602	6.42661	1.07901	0.10971	0.109358	0.0864795
sp|Q9P2R7|SUCB1_HUMAN	SUCLA2	SUCB1_HUMAN Succinyl-CoA ligase [ADP-forming] subunit beta, mitochondrial	36	5.61164	5.92808	6.2077	6.4052	6.17311	6.28413	6.77113	6.8317	6.03815	6.51502	1.07897	0.109661	0.0571706	0.0513751
sp|P53677|AP3M2_HUMAN	AP3M2	AP3M2_HUMAN AP-3 complex subunit mu-2	7	5.61273	5.85274	6.67991	5.8444	6.40909	6.29993	6.58247	6.58992	5.99744	6.47035	1.07885	0.109496	0.0780958	0.0217955
sp|P22314|UBA1_HUMAN	UBA1	UBA1_HUMAN Ubiquitin-like modifier-activating enzyme 1	101	5.75469	5.76813	6.05651	6.45556	6.17224	6.05353	6.77672	6.92713	6.00872	6.4824	1.07883	0.109471	0.0547235	0.066919
sp|P30740|ILEU_HUMAN	SERPINB1	ILEU_HUMAN Leukocyte elastase inhibitor	28	5.81477	5.76706	6.30701	6.24195	6.34669	6.23412	6.89217	6.5577	6.0327	6.50767	1.07873	0.109338	0.0465998	0.0444556
sp|Q96EL2|RT24_HUMAN	MRPS24	RT24_HUMAN 28S ribosomal protein S24, mitochondrial	3	5.41575	5.498	6.41191	6.58872	5.78782	5.93926	7.16942	6.89949	5.9786	6.449	1.07868	0.109268	0.101641	0.106642
sp|Q9Y6J9|TAF6L_HUMAN	TAF6L	TAF6L_HUMAN TAF6-like RNA polymerase II p300/CBP-associated factor-associated factor 65 kDa subunit 6L	2	6.7175	5.60968	6.33233	5.68864	6.90308	6.36601	6.67724	6.31669	6.08704	6.56576	1.07865	0.109221	0.0871499	0.0420014
sp|Q96FQ6|S10AG_HUMAN	S100A16	S10AG_HUMAN Protein S100-A16	11	6.02671	6.29335	5.86557	5.71712	6.15222	6.82847	6.33685	6.46424	5.97569	6.44545	1.07861	0.109175	0.0412741	0.0443224
sp|Q92990|GLMN_HUMAN	GLMN	GLMN_HUMAN Glomulin	12	5.73261	5.72282	6.48054	6.56288	6.64281	6.5244	6.69824	6.55844	6.12471	6.60597	1.07858	0.109129	0.0750503	0.0119782
sp|P56192|SYMC_HUMAN	MARS	SYMC_HUMAN Methionine--tRNA ligase, cytoplasmic	47	5.98734	5.66364	6.41484	6.39548	6.43803	6.37375	6.87019	6.69891	6.11533	6.59522	1.07847	0.108992	0.058853	0.0350292
sp|Q13131-2|AAPK1_HUMAN	PRKAA1	AAPK1_HUMAN Isoform 2 of 5'-AMP-activated protein kinase catalytic subunit alpha-1	18	5.8	5.6856	6.07635	6.21488	6.25027	6.12544	6.65382	6.6115	5.94421	6.41026	1.0784	0.108898	0.0410243	0.0409321
sp|Q9Y5A6|ZSC21_HUMAN	ZSCAN21	ZSC21_HUMAN Zinc finger and SCAN domain-containing protein 21	1	5.86261	5.55363	5.86795	6.81346	5.81686	6.8047	6.82391	6.54147	6.02441	6.49674	1.0784	0.108894	0.0906588	0.0725303
sp|P33121|ACSL1_HUMAN	ACSL1	ACSL1_HUMAN Long-chain-fatty-acid--CoA ligase 1	13	5.93788	6.27182	6.91776	6.58668	6.62082	6.69098	7.18919	7.22894	6.42854	6.93248	1.07839	0.108882	0.0653617	0.0463127
sp|P30305-4|MPIP2_HUMAN	CDC25B	MPIP2_HUMAN Isoform 4 of M-phase inducer phosphatase 2	6	5.87542	5.94485	6.18793	6.32052	6.46726	6.65204	6.50276	6.61372	6.08218	6.55894	1.07839	0.108875	0.0341727	0.0134162
sp|Q14566|MCM6_HUMAN	MCM6	MCM6_HUMAN DNA replication licensing factor MCM6	49	5.88518	5.79465	6.17156	6.48322	6.32036	6.38684	6.78	6.75214	6.08365	6.55984	1.07827	0.108722	0.0511323	0.0365788
sp|O75164|KDM4A_HUMAN	KDM4A	KDM4A_HUMAN Lysine-specific demethylase 4A	5	5.595	5.84787	6.53427	6.53264	5.92811	6.56639	6.89043	7.04324	6.12744	6.60704	1.07827	0.108719	0.0783445	0.0748234
sp|Q6Y1H2|HACD2_HUMAN	PTPLB	HACD2_HUMAN Very-long-chain (3R)-3-hydroxyacyl-[acyl-carrier protein] dehydratase 2	1	5.60878	5.50206	5.84129	6.8117	6.39806	6.23227	6.37644	6.61704	5.94096	6.40595	1.07827	0.108718	0.100577	0.0247902
sp|Q02750|MP2K1_HUMAN	MAP2K1	MP2K1_HUMAN Dual specificity mitogen-activated protein kinase kinase 1	6	5.96114	5.69068	6.35272	6.36514	6.46864	6.45653	6.57944	6.76872	6.09242	6.56833	1.07812	0.108512	0.0536711	0.0220129
sp|O60942|MCE1_HUMAN	RNGTT	MCE1_HUMAN mRNA-capping enzyme	10	5.93154	5.6919	6.60391	5.79605	6.37083	5.93483	6.90311	6.69107	6.00585	6.47496	1.07811	0.108503	0.0683668	0.0650733
sp|Q53FT3|HIKES_HUMAN	C11orf73	HIKES_HUMAN Protein Hikeshi	4	5.84212	5.85633	6.17766	6.1153	5.88381	6.50152	6.8882	6.58908	5.99785	6.46565	1.07799	0.10835	0.0289429	0.0652286
sp|O60427|FADS1_HUMAN	FADS1	FADS1_HUMAN Fatty acid desaturase 1	5	5.91438	5.83226	6.16521	6.20586	6.38431	6.33139	6.61214	6.67083	6.02943	6.49967	1.07799	0.108345	0.0305333	0.0256789
sp|P49137|MAPK2_HUMAN	MAPKAPK2	MAPK2_HUMAN MAP kinase-activated protein kinase 2	14	5.67443	5.87287	6.22701	6.60456	6.25603	6.23889	6.95093	6.83377	6.09472	6.56991	1.07797	0.108313	0.0672045	0.0571473
sp|Q8NDZ6|T161B_HUMAN	TMEM161B	T161B_HUMAN Transmembrane protein 161B	2	5.68395	5.75126	5.57707	6.59525	5.84656	6.23433	6.7894	6.57688	5.90188	6.36179	1.07793	0.108258	0.0792588	0.0648626
sp|Q969N2|PIGT_HUMAN	PIGT	PIGT_HUMAN GPI transamidase component PIG-T	9	6.1704	6.05301	6.53126	6.26153	6.31836	6.68149	7.1042	6.8608	6.25405	6.74121	1.0779	0.108217	0.0325493	0.0490822
sp|Q9HBM1|SPC25_HUMAN	SPC25	SPC25_HUMAN Kinetochore protein Spc25	5	5.50596	5.96055	6.69253	6.55441	6.24402	6.51196	6.71788	7.1632	6.17836	6.65927	1.07784	0.108138	0.0889147	0.058257
sp|O00232|PSD12_HUMAN	PSMD12	PSD12_HUMAN 26S proteasome non-ATPase regulatory subunit 12	46	5.91273	5.88319	6.22012	6.33269	6.29923	6.25577	6.93369	6.75443	6.08718	6.56078	1.0778	0.108093	0.0367332	0.0511615
sp|Q9BZF9|UACA_HUMAN	UACA	UACA_HUMAN Uveal autoantigen with coiled-coil domains and ankyrin repeats	28	5.82619	5.72995	6.28491	6.53509	6.38854	6.43729	6.80895	6.63739	6.09403	6.56804	1.07778	0.108066	0.0625043	0.0294393
sp|Q92558|WASF1_HUMAN	WASF1	WASF1_HUMAN Wiskott-Aldrich syndrome protein family member 1	6	5.82725	5.73623	6.25939	6.38772	6.19044	6.25873	7.03873	6.60386	6.05265	6.52294	1.0777	0.107956	0.0527609	0.0595691
sp|Q9H0S4|DDX47_HUMAN	DDX47	DDX47_HUMAN Probable ATP-dependent RNA helicase DDX47	15	5.97671	6.00498	6.14284	6.18092	6.64627	6.41242	6.73302	6.40006	6.07636	6.54794	1.07761	0.107834	0.0165605	0.0255789
sp|Q96CS3|FAF2_HUMAN	FAF2	FAF2_HUMAN FAS-associated factor 2	11	5.83234	6.04678	6.38638	6.18518	6.44763	6.54687	6.61121	6.74037	6.11267	6.58652	1.07752	0.107714	0.038145	0.018624
tr|G3V325|G3V325_HUMAN	ATP5J2-PTCD1	G3V325_HUMAN Pentatricopeptide repeat-containing protein 1, mitochondrial	15	5.8777	5.6318	6.43715	6.39836	6.43511	6.16081	6.72647	6.90542	6.08625	6.55695	1.07734	0.107471	0.0650725	0.0499603
sp|O43157|PLXB1_HUMAN	PLXNB1	PLXB1_HUMAN Plexin-B1	1	5.86626	7.23987	6.75252	5.82062	6.07601	7.48248	7.67126	6.43439	6.41982	6.91603	1.07729	0.107413	0.108242	0.112894
sp|Q6NZY4|ZCHC8_HUMAN	ZCCHC8	ZCHC8_HUMAN Zinc finger CCHC domain-containing protein 8	13	5.88259	5.87682	6.19386	6.73088	6.6271	6.58904	6.8016	6.57363	6.17104	6.64784	1.07726	0.107373	0.065069	0.0157855
sp|Q9GZY4|COA1_HUMAN	COA1	COA1_HUMAN Cytochrome c oxidase assembly protein 1 homolog	4	5.09834	6.04437	6.26138	6.83344	6.47209	6.34852	6.45607	6.83286	6.05938	6.52738	1.07724	0.107334	0.119152	0.0323118
sp|P82673|RT35_HUMAN	MRPS35	RT35_HUMAN 28S ribosomal protein S35, mitochondrial	14	5.7293	5.80187	6.11673	6.55045	6.20358	6.30757	6.60703	6.94883	6.04959	6.51675	1.07722	0.107316	0.0617997	0.051406
sp|P54577|SYYC_HUMAN	YARS	SYYC_HUMAN Tyrosine--tRNA ligase, cytoplasmic	65	6.08686	5.80905	6.15357	6.19619	6.38213	6.24086	6.74299	6.75014	6.06142	6.52903	1.07715	0.107213	0.0287321	0.039476
sp|Q9Y6M9|NDUB9_HUMAN	NDUFB9	NDUB9_HUMAN NADH dehydrogenase [ubiquinone] 1 beta subcomplex subunit 9	12	5.77582	5.80473	6.07844	6.35451	6.27993	6.1007	6.60554	6.87957	6.00338	6.46644	1.07713	0.107197	0.0451258	0.0534645
sp|Q9BYN8|RT26_HUMAN	MRPS26	RT26_HUMAN 28S ribosomal protein S26, mitochondrial	8	5.52479	5.55391	6.0741	6.55826	6.28768	5.96215	6.48861	6.80128	5.92776	6.38493	1.07712	0.107183	0.0827074	0.0551732
sp|Q6NXT4-2|ZNT6_HUMAN	SLC30A6	ZNT6_HUMAN Isoform 2 of Zinc transporter 6	3	4.95838	5.54099	7.11055	6.85454	6.59273	6.24214	6.43305	7.0822	6.11611	6.58753	1.07708	0.107122	0.169004	0.0545843
sp|Q96FC9|DDX11_HUMAN	DDX11	DDX11_HUMAN Probable ATP-dependent RNA helicase DDX11	10	5.73737	5.92929	6.66904	6.2742	6.55629	6.50881	6.85347	6.58816	6.15247	6.62668	1.07708	0.10712	0.0666055	0.02334
sp|O75955|FLOT1_HUMAN	FLOT1	FLOT1_HUMAN Flotillin-1	6	5.69448	5.63335	5.93937	6.65046	5.96041	6.37094	6.64253	6.78623	5.97942	6.44003	1.07703	0.107063	0.0780169	0.0563921
sp|P54855|UDB15_HUMAN	UGT2B15	UDB15_HUMAN UDP-glucuronosyltransferase 2B15	1	7.28159	9.27914	9.70402	7.59363	7.57795	9.76633	9.34177	9.77751	8.46459	9.11589	1.07694	0.106942	0.142385	0.114653
sp|P31939|PUR9_HUMAN	ATIC	PUR9_HUMAN Bifunctional purine biosynthesis protein PURH	63	5.60902	5.70473	6.01186	6.43611	5.93621	6.17967	6.64887	6.82492	5.94043	6.39742	1.07693	0.106922	0.0626998	0.0642035
sp|O15258|RER1_HUMAN	RER1	RER1_HUMAN Protein RER1	5	5.96257	5.93212	6.50383	6.03556	6.60596	6.53175	6.48958	6.68595	6.10852	6.57831	1.07691	0.106894	0.0437242	0.0131332
sp|Q9BZV1|UBXN6_HUMAN	UBXN6	UBXN6_HUMAN UBX domain-containing protein 6	5	5.50283	5.26382	6.33622	6.47981	6.28849	5.85183	6.45655	6.79925	5.89567	6.34903	1.0769	0.10688	0.102186	0.0620183
sp|Q16540|RM23_HUMAN	MRPL23	RM23_HUMAN 39S ribosomal protein L23, mitochondrial	10	5.24387	5.74245	5.91898	6.74738	5.87383	6.07338	6.75607	6.76803	5.91317	6.36783	1.07689	0.10687	0.105749	0.0726256
sp|Q9UHB9|SRP68_HUMAN	SRP68	SRP68_HUMAN Signal recognition particle subunit SRP68	33	5.97353	5.77837	6.16331	6.32303	6.32079	6.50972	6.6505	6.6179	6.05956	6.52473	1.07677	0.106705	0.0388956	0.0227869
sp|Q15070|OXA1L_HUMAN	OXA1L	OXA1L_HUMAN Mitochondrial inner membrane protein OXA1L	12	5.95855	5.75792	6.31353	6.32829	6.24836	6.40758	6.70073	6.87137	6.08957	6.55701	1.07676	0.106697	0.0458925	0.042872
sp|P17987|TCPA_HUMAN	TCP1	TCPA_HUMAN T-complex protein 1 subunit alpha	136	5.99606	5.94251	6.03693	6.09736	6.30985	6.25015	6.66143	6.69906	6.01821	6.48012	1.07675	0.106685	0.010869	0.0359361
sp|P27708|PYR1_HUMAN	CAD	PYR1_HUMAN CAD protein	103	5.9363	5.83378	6.29931	6.51125	6.32128	6.34681	6.94153	6.85746	6.14516	6.61677	1.07674	0.106677	0.0513192	0.0496356
tr|H0YEH1|H0YEH1_HUMAN	PICALM	H0YEH1_HUMAN Phosphatidylinositol-binding clathrin assembly protein (Fragment)	1	6.48643	5.71871	6.79579	5.46059	6.45077	5.54658	7.155	7.1842	6.11538	6.58414	1.07665	0.106552	0.102847	0.116999
sp|Q99832|TCPH_HUMAN	CCT7	TCPH_HUMAN T-complex protein 1 subunit eta	112	5.76093	5.81685	6.24022	6.23272	6.26147	6.26746	6.6616	6.70344	6.01268	6.47349	1.07664	0.106536	0.043148	0.0373802
sp|O75689|ADAP1_HUMAN	ADAP1	ADAP1_HUMAN Arf-GAP with dual PH domain-containing protein 1	6	5.42082	5.76216	6.0814	6.58598	6.19037	6.02848	6.54053	6.91879	5.96259	6.41954	1.07664	0.106531	0.0830934	0.0616137
sp|Q8IX04|UEVLD_HUMAN	UEVLD	UEVLD_HUMAN Ubiquitin-conjugating enzyme E2 variant 3	9	5.87456	6.09421	6.43615	6.49732	6.39138	6.4066	6.99499	7.01687	6.22556	6.70246	1.0766	0.106487	0.0471652	0.052307
sp|Q96RL7|VP13A_HUMAN	VPS13A	VP13A_HUMAN Vacuolar protein sorting-associated protein 13A	7	5.87731	5.8906	6.38973	6.32749	6.12107	6.63435	7.02875	6.57626	6.12128	6.59011	1.07659	0.106468	0.0449695	0.0564075
sp|Q86X55|CARM1_HUMAN	CARM1	CARM1_HUMAN Histone-arginine methyltransferase CARM1	21	6.01239	5.72205	6.46863	6.24061	6.45129	6.26165	6.86025	6.74164	6.11092	6.57871	1.07655	0.106415	0.0522376	0.0414034
sp|Q12904-2|AIMP1_HUMAN	AIMP1	AIMP1_HUMAN Isoform 2 of Aminoacyl tRNA synthase complex-interacting multifunctional protein 1	22	5.94671	5.88173	6.35416	6.53406	6.40889	6.42589	6.89055	6.88306	6.17917	6.6521	1.07654	0.106397	0.0510976	0.0407575
sp|Q9H4L4|SENP3_HUMAN	SENP3	SENP3_HUMAN Sentrin-specific protease 3	1	4.60731	5.10546	7.54406	5.66805	6.26724	6.89397	6.46117	5.05696	5.73122	6.16983	1.07653	0.10639	0.224017	0.127526
sp|Q92616|GCN1L_HUMAN	GCN1L1	GCN1L_HUMAN Translational activator GCN1	130	6.00699	5.84104	6.55387	6.54665	6.49064	6.33463	7.15358	6.87887	6.23714	6.71443	1.07652	0.106381	0.0589801	0.0553411
sp|Q8WVC6|DCAKD_HUMAN	DCAKD	DCAKD_HUMAN Dephospho-CoA kinase domain-containing protein	5	5.75904	6.14551	6.68046	6.74119	7.03466	6.43854	7.09795	6.6923	6.33155	6.81586	1.07649	0.106338	0.0736253	0.0452279
sp|Q9Y666|S12A7_HUMAN	SLC12A7	S12A7_HUMAN Solute carrier family 12 member 7	13	5.68356	5.83228	6.19461	6.33427	6.29434	6.52071	6.51205	6.55635	6.01118	6.47086	1.07647	0.10631	0.0505839	0.0184261
sp|Q9BSI4|TINF2_HUMAN	TINF2	TINF2_HUMAN TERF1-interacting nuclear factor 2	1	5.61342	5.11058	6.38414	6.74717	5.8522	6.08269	6.75219	6.99247	5.96383	6.41989	1.07647	0.106309	0.124017	0.084087
sp|Q9BVG9|PTSS2_HUMAN	PTDSS2	PTSS2_HUMAN Phosphatidylserine synthase 2	4	6.00971	5.91171	6.39524	6.60253	6.4614	6.36438	7.09574	6.9016	6.2298	6.70578	1.0764	0.10622	0.0520899	0.0521362
sp|P31150|GDIA_HUMAN	GDI1	GDIA_HUMAN Rab GDP dissociation inhibitor alpha	44	5.69344	5.60296	6.23097	6.38736	6.30484	5.96674	6.66115	6.80725	5.97868	6.43499	1.07632	0.106111	0.0650096	0.058554
sp|P11177|ODPB_HUMAN	PDHB	ODPB_HUMAN Pyruvate dehydrogenase E1 component subunit beta, mitochondrial	22	5.96383	5.87108	6.14446	6.21514	6.37883	6.27744	6.70332	6.68149	6.04863	6.51027	1.07632	0.10611	0.026249	0.0329527
sp|Q86W92|LIPB1_HUMAN	PPFIBP1	LIPB1_HUMAN Liprin-beta-1	24	6.00114	5.67487	6.47823	6.57825	6.62708	6.21383	7.09522	6.68317	6.18312	6.65483	1.07629	0.106065	0.0682759	0.0541793
sp|Q8N0Z6|TTC5_HUMAN	TTC5	TTC5_HUMAN Tetratricopeptide repeat protein 5	19	5.55092	5.98113	6.13148	6.25507	6.10447	6.16182	6.68404	6.7903	5.97965	6.43516	1.07618	0.105914	0.0513384	0.0547307
sp|P78344|IF4G2_HUMAN	EIF4G2	IF4G2_HUMAN Eukaryotic translation initiation factor 4 gamma 2	50	6.00866	5.79094	6.38575	6.34097	6.48119	6.31605	6.95822	6.63807	6.13158	6.59838	1.07613	0.105854	0.0460896	0.0414585
sp|P78356|PI42B_HUMAN	PIP4K2B	PI42B_HUMAN Phosphatidylinositol 5-phosphate 4-kinase type-2 beta	9	5.5736	5.74933	5.977	6.31831	5.93332	6.46418	6.44663	6.57126	5.90456	6.35385	1.07609	0.105801	0.0544478	0.0449667
sp|Q9BZJ0|CRNL1_HUMAN	CRNKL1	CRNL1_HUMAN Crooked neck-like protein 1	19	5.66251	5.65284	6.39486	6.31989	6.16566	6.16394	6.7082	6.82052	6.00753	6.46458	1.07608	0.105786	0.0674402	0.0540145
sp|Q08AF3|SLFN5_HUMAN	SLFN5	SLFN5_HUMAN Schlafen family member 5	4	6.14933	5.68017	6.41942	6.25816	7.0417	6.4313	6.84993	6.04565	6.12677	6.59215	1.07596	0.105621	0.0518602	0.0674481
sp|Q86V85|GP180_HUMAN	GPR180	GP180_HUMAN Integral membrane protein GPR180	2	6.07034	6.0072	6.96596	5.91257	6.73716	6.13416	6.96377	7.01627	6.23902	6.71284	1.07595	0.105604	0.0783691	0.0602354
sp|Q13190|STX5_HUMAN	STX5	STX5_HUMAN Syntaxin-5	6	5.99563	5.78147	6.34564	6.34433	6.17555	6.61563	6.69235	6.83923	6.11677	6.58069	1.07584	0.105469	0.0453914	0.0433969
sp|Q92905|CSN5_HUMAN	COPS5	CSN5_HUMAN COP9 signalosome complex subunit 5	22	6.1742	6.11309	5.81925	5.9858	6.40915	6.48184	6.45336	6.5744	6.02309	6.47969	1.07581	0.105422	0.0260538	0.0107823
sp|Q9NY97|B3GN2_HUMAN	B3GNT2	B3GN2_HUMAN UDP-GlcNAc:betaGal beta-1,3-N-acetylglucosaminyltransferase 2	3	5.58712	5.96682	5.63253	6.23815	5.74231	6.39201	6.20443	6.85725	5.85616	6.299	1.07562	0.105169	0.0522199	0.0732767
sp|Q01780|EXOSX_HUMAN	EXOSC10	EXOSX_HUMAN Exosome component 10	27	5.54628	5.43224	6.54118	6.24962	6.49863	6.30228	6.31514	6.44854	5.94233	6.39115	1.07553	0.105046	0.0906288	0.0152561
sp|Q99973|TEP1_HUMAN	TEP1	TEP1_HUMAN Telomerase protein component 1	3	6.15444	6.66415	6.60492	6.86773	6.49566	7.21112	8.07893	6.49092	6.57281	7.06916	1.07552	0.105028	0.0457595	0.106582
sp|Q96FN9|DTD2_HUMAN	DTD2	DTD2_HUMAN Probable D-tyrosyl-tRNA(Tyr) deacylase 2	2	5.63661	5.35545	6.00198	6.18331	5.90509	6.72457	6.13436	6.16227	5.79434	6.23157	1.07546	0.104953	0.0639498	0.0558891
sp|Q9Y4G2|PKHM1_HUMAN	PLEKHM1	PKHM1_HUMAN Pleckstrin homology domain-containing family M member 1	3	5.65537	6.0015	6.75802	6.43944	6.39999	6.76784	6.75574	6.80608	6.21358	6.68241	1.07545	0.104944	0.0779623	0.028358
sp|P29992|GNA11_HUMAN	GNA11	GNA11_HUMAN Guanine nucleotide-binding protein subunit alpha-11	11	5.93919	6.02537	6.38164	6.32647	6.31312	6.45804	6.72752	7.03493	6.16817	6.6334	1.07543	0.104907	0.0354517	0.0479426
sp|Q9BV10|ALG12_HUMAN	ALG12	ALG12_HUMAN Dol-P-Man:Man(7)GlcNAc(2)-PP-Dol alpha-1,6-mannosyltransferase	2	5.68722	6.0255	6.56428	6.74604	6.63477	6.57461	6.8534	6.84633	6.25576	6.72728	1.07537	0.104838	0.0778652	0.0213602
sp|Q8TEA1|NSUN6_HUMAN	NSUN6	NSUN6_HUMAN Putative methyltransferase NSUN6	10	5.795	5.76632	6.10268	6.37449	6.48368	6.13027	6.46747	6.76849	6.00962	6.46248	1.07535	0.104813	0.0477509	0.0403985
sp|Q9NP78|ABCB9_HUMAN	ABCB9	ABCB9_HUMAN ATP-binding cassette sub-family B member 9	1	6.4308	6.11599	7.25193	5.6182	6.44177	6.03237	8.10144	6.756	6.35423	6.8329	1.07533	0.10478	0.1079	0.131144
sp|P52735|VAV2_HUMAN	VAV2	VAV2_HUMAN Guanine nucleotide exchange factor VAV2	13	5.8578	6.05673	6.54278	6.63018	6.45926	6.50594	7.02872	6.9807	6.27187	6.74365	1.07522	0.104634	0.0596235	0.0448833
sp|Q7L8L6|FAKD5_HUMAN	FASTKD5	FAKD5_HUMAN FAST kinase domain-containing protein 5	9	6.30467	5.82165	6.36572	6.26419	6.63474	6.46412	6.64882	6.87074	6.18906	6.65461	1.07522	0.104633	0.0401463	0.0250594
sp|Q9HBH0|RHOF_HUMAN	RHOF	RHOF_HUMAN Rho-related GTP-binding protein RhoF	5	6.37231	5.9956	6.22347	6.57202	6.6877	6.75291	6.62393	6.99155	6.29085	6.76402	1.07522	0.104626	0.0386556	0.0237381
sp|P53794|SC5A3_HUMAN	SLC5A3	SC5A3_HUMAN Sodium/myo-inositol cotransporter	3	6.23193	5.89104	6.61167	6.72212	6.19283	7.02245	7.03051	7.12571	6.36419	6.84287	1.07522	0.104626	0.0595382	0.0637003
sp|P10644|KAP0_HUMAN	PRKAR1A	KAP0_HUMAN cAMP-dependent protein kinase type I-alpha regulatory subunit	27	5.85605	5.8316	6.14167	6.41992	6.22313	6.22865	6.76785	6.85321	6.06231	6.51821	1.0752	0.104608	0.0456689	0.0520609
sp|P09525|ANXA4_HUMAN	ANXA4	ANXA4_HUMAN Annexin A4	32	5.6121	5.50826	6.19354	6.34944	6.10418	5.77753	6.83027	6.73085	5.91584	6.36071	1.0752	0.104605	0.0706129	0.0793066
sp|Q9NVG8|TBC13_HUMAN	TBC1D13	TBC13_HUMAN TBC1 domain family member 13	2	5.62733	6.12014	6.04006	6.72222	6.62754	6.67335	6.90817	6.14344	6.12744	6.58812	1.07518	0.104584	0.0736853	0.0487136
sp|P51398|RT29_HUMAN	DAP3	RT29_HUMAN 28S ribosomal protein S29, mitochondrial	26	5.88685	5.82344	5.91786	6.23178	6.07254	6.30429	6.72936	6.54734	5.96498	6.41338	1.07517	0.104568	0.0305372	0.0446372
sp|Q14653|IRF3_HUMAN	IRF3	IRF3_HUMAN Interferon regulatory factor 3	6	5.67868	5.82716	6.42919	6.19041	5.9913	6.1839	7.15666	6.60697	6.03136	6.48471	1.07517	0.104558	0.0566029	0.0796533
sp|P43490|NAMPT_HUMAN	NAMPT	NAMPT_HUMAN Nicotinamide phosphoribosyltransferase	34	5.78513	5.62183	6.14808	6.34822	6.30027	5.91416	6.70919	6.77536	5.97581	6.42474	1.07512	0.104504	0.0555031	0.0622613
sp|Q13017|RHG05_HUMAN	ARHGAP5	RHG05_HUMAN Rho GTPase-activating protein 5	13	5.7529	5.56737	6.12899	6.12551	6.11005	6.10607	6.60658	6.52237	5.89369	6.33627	1.07509	0.104461	0.0475299	0.041941
tr|B4DX52|B4DX52_HUMAN	DNAJB1	B4DX52_HUMAN DnaJ homolog subfamily B member 1	1	6.15006	7.14612	4.94818	5.01431	7.65888	5.74983	5.37911	6.2162	5.81467	6.25101	1.07504	0.104391	0.179733	0.159833
sp|Q9NZB2-6|F120A_HUMAN	FAM120A	F120A_HUMAN Isoform F of Constitutive coactivator of PPAR-gamma-like protein 1	17	6.02547	6.02205	6.21036	6.45851	6.54376	6.31101	7.05756	6.65825	6.1791	6.64264	1.07502	0.104362	0.033339	0.0469794
sp|P78527|PRKDC_HUMAN	PRKDC	PRKDC_HUMAN DNA-dependent protein kinase catalytic subunit	222	6.16084	5.81971	6.73283	6.56714	6.68818	6.47031	7.14005	6.87796	6.32013	6.79412	1.075	0.104334	0.0650538	0.0418703
sp|P17980|PRS6A_HUMAN	PSMC3	PRS6A_HUMAN 26S protease regulatory subunit 6A	58	5.79202	5.6782	6.11689	6.39398	6.23843	6.13405	6.76484	6.64007	5.99527	6.44435	1.0749	0.104209	0.0541006	0.0473821
sp|Q9ULD0|OGDHL_HUMAN	OGDHL	OGDHL_HUMAN 2-oxoglutarate dehydrogenase-like, mitochondrial	5	5.38446	5.76225	6.2572	6.50806	5.99923	6.05051	6.82771	6.8233	5.97799	6.42519	1.07481	0.104077	0.0840714	0.0720172
sp|O00148|DX39A_HUMAN	DDX39A	DX39A_HUMAN ATP-dependent RNA helicase DDX39A	8	5.67493	5.39159	6.81116	6.16435	6.305	6.16428	6.80982	6.56117	6.01051	6.46007	1.0748	0.104062	0.103473	0.0441543
sp|P40937|RFC5_HUMAN	RFC5	RFC5_HUMAN Replication factor C subunit 5	22	6.12774	5.8891	6.371	6.46276	6.5085	6.40121	6.87756	6.9218	6.21265	6.67727	1.07479	0.104049	0.0415107	0.0391108
sp|Q92930|RAB8B_HUMAN	RAB8B	RAB8B_HUMAN Ras-related protein Rab-8B	2	6.14567	6.38927	5.25557	5.46611	6.10276	7.05847	5.67669	6.15138	5.81415	6.24733	1.0745	0.103669	0.0928243	0.0930458
sp|Q96H20|SNF8_HUMAN	SNF8	SNF8_HUMAN Vacuolar-sorting protein SNF8	7	6.05668	5.91655	6.14023	6.2274	6.37255	6.52371	6.50862	6.74759	6.08521	6.53812	1.07443	0.103567	0.0217403	0.0237554
sp|Q09161|NCBP1_HUMAN	NCBP1	NCBP1_HUMAN Nuclear cap-binding protein subunit 1	35	5.82182	5.69464	6.45546	6.58486	6.27422	6.25818	7.00188	6.8489	6.13919	6.59579	1.07437	0.103497	0.0726631	0.0584811
sp|Q9BTE6-3|AASD1_HUMAN	AARSD1	AASD1_HUMAN Isoform 3 of Alanyl-tRNA editing protein Aarsd1	13	5.92804	5.85506	6.23199	6.33742	6.40234	6.35787	6.74924	6.65268	6.08813	6.54053	1.07431	0.10341	0.0382624	0.0290896
sp|Q99536|VAT1_HUMAN	VAT1	VAT1_HUMAN Synaptic vesicle membrane protein VAT-1 homolog	27	5.96254	5.80353	6.16559	6.28621	6.42769	6.22343	6.59542	6.77071	6.05447	6.50431	1.0743	0.103396	0.0353567	0.0359505
sp|Q99551|MTERF_HUMAN	MTERF	MTERF_HUMAN Transcription termination factor, mitochondrial	4	5.78173	5.47283	6.12598	6.52803	6.50336	5.87477	6.5027	6.80396	5.97714	6.4212	1.07429	0.103386	0.0759437	0.0608815
sp|Q9Y2G3|AT11B_HUMAN	ATP11B	AT11B_HUMAN Probable phospholipid-transporting ATPase IF	5	5.46773	5.73216	6.53831	6.87552	6.81659	6.14047	6.66467	6.82013	6.15343	6.61046	1.07427	0.103361	0.107683	0.0486502
sp|Q9H8Y8|GORS2_HUMAN	GORASP2	GORS2_HUMAN Golgi reassembly-stacking protein 2	13	5.96901	6.0498	5.90476	6.03483	6.24842	6.44597	6.31226	6.73076	5.9896	6.43435	1.07425	0.103335	0.011113	0.0332689
sp|P54886|P5CS_HUMAN	ALDH18A1	P5CS_HUMAN Delta-1-pyrroline-5-carboxylate synthase	50	5.85778	5.66214	6.42194	6.35545	6.18489	6.2134	6.99018	6.71229	6.07433	6.52519	1.07422	0.103295	0.0613522	0.0602861
sp|Q7Z6J9|SEN54_HUMAN	TSEN54	SEN54_HUMAN tRNA-splicing endonuclease subunit Sen54	7	5.17443	5.46876	6.22274	6.61021	5.66962	6.13446	6.78402	6.6275	5.86904	6.3039	1.07409	0.103121	0.112899	0.0801708
sp|Q9Y697|NFS1_HUMAN	NFS1	NFS1_HUMAN Cysteine desulfurase, mitochondrial	15	5.99903	5.72986	6.20253	6.21444	6.39943	6.38838	6.63751	6.50852	6.03646	6.48346	1.07405	0.10306	0.0376138	0.0179122
sp|Q9NXJ5|PGPI_HUMAN	PGPEP1	PGPI_HUMAN Pyroglutamyl-peptidase 1	1	6.25202	5.71705	6.07392	6.69727	6.45387	6.19789	6.62985	7.28903	6.18506	6.64266	1.07398	0.102972	0.0658884	0.0701501
sp|Q07866-4|KLC1_HUMAN	KLC1	KLC1_HUMAN Isoform J of Kinesin light chain 1	50	5.85455	5.889	6.00742	6.42561	6.07054	6.08464	6.86803	6.94136	6.04414	6.49114	1.07396	0.102934	0.0434474	0.0737161
sp|Q32P41|TRM5_HUMAN	TRMT5	TRM5_HUMAN tRNA (guanine(37)-N1)-methyltransferase	20	5.79976	5.67754	6.34112	6.34524	6.40403	6.17502	6.71176	6.65946	6.04092	6.48757	1.07394	0.102911	0.058365	0.038223
sp|P33991|MCM4_HUMAN	MCM4	MCM4_HUMAN DNA replication licensing factor MCM4	39	6.06437	5.88611	6.32261	6.41862	6.56618	6.44692	6.70935	6.79463	6.17293	6.62927	1.07393	0.102895	0.0393289	0.0232043
sp|Q96IW7|SC22A_HUMAN	SEC22A	SC22A_HUMAN Vesicle-trafficking protein SEC22a	3	6.22487	5.16767	5.95387	6.99433	6.12086	6.64192	6.95277	6.42219	6.08518	6.53444	1.07383	0.102761	0.123892	0.0537588
sp|Q6P1M0|S27A4_HUMAN	SLC27A4	S27A4_HUMAN Long-chain fatty acid transport protein 4	11	6.01885	5.8884	6.41523	6.38998	6.45598	6.1646	7.10252	6.8138	6.17812	6.63423	1.07383	0.102761	0.0428664	0.0617742
sp|Q9H9B4|SFXN1_HUMAN	SFXN1	SFXN1_HUMAN Sideroflexin-1	12	5.93489	5.80002	6.39938	6.5115	6.14987	6.40214	7.03431	6.87873	6.16145	6.61626	1.07382	0.102747	0.0563086	0.0621356
sp|P08243|ASNS_HUMAN	ASNS	ASNS_HUMAN Asparagine synthetase [glutamine-hydrolyzing]	58	5.92695	5.74232	6.38676	6.37148	6.37829	6.32354	6.91807	6.60981	6.10688	6.55743	1.07378	0.102695	0.052945	0.0412594
sp|Q96IZ6|MET2A_HUMAN	METTL2A	MET2A_HUMAN Methyltransferase-like protein 2A	4	6.31066	6.10178	6.12386	6.23863	5.94344	6.61963	7.112	6.92758	6.19373	6.65066	1.07377	0.102689	0.0158809	0.0771906
sp|Q9NWV8|BABA1_HUMAN	BABAM1	BABA1_HUMAN BRISC and BRCA1-A complex member 1	7	5.89594	5.93915	5.6414	6.06164	6.55738	6.36928	5.99672	6.3509	5.88453	6.31857	1.07376	0.10267	0.0300159	0.0370299
sp|Q13596|SNX1_HUMAN	SNX1	SNX1_HUMAN Sorting nexin-1	24	5.69013	5.83073	5.99569	6.50509	6.15973	6.18148	6.65654	6.79446	6.00541	6.44805	1.07371	0.102601	0.0592394	0.0504649
sp|P03905|NU4M_HUMAN	MT-ND4	NU4M_HUMAN NADH-ubiquinone oxidoreductase chain 4	3	5.51746	5.33024	6.36413	6.695	6.04054	6.50408	6.33553	6.78801	5.97671	6.41704	1.07367	0.102557	0.109923	0.0487501
sp|Q9BQB6|VKOR1_HUMAN	VKORC1	VKOR1_HUMAN Vitamin K epoxide reductase complex subunit 1	1	6.49831	6.39275	6.29703	7.5302	7.03669	7.54692	7.04568	7.05722	6.67957	7.17163	1.07367	0.102545	0.0857858	0.0349065
sp|Q92979|NEP1_HUMAN	EMG1	NEP1_HUMAN Ribosomal RNA small subunit methyltransferase NEP1	13	6.08648	5.83667	6.26932	6.29803	6.35937	6.48394	6.78679	6.66427	6.12263	6.57359	1.07366	0.102532	0.0346938	0.0288106
sp|Q9BW27|NUP85_HUMAN	NUP85	NUP85_HUMAN Nuclear pore complex protein Nup85	10	6.13069	5.94091	6.51392	6.54633	6.662	6.38444	6.95275	6.98076	6.28296	6.74499	1.07354	0.102371	0.0471154	0.0415507
sp|Q9NQW7-3|XPP1_HUMAN	XPNPEP1	XPP1_HUMAN Isoform 3 of Xaa-Pro aminopeptidase 1	40	5.92039	5.86204	6.09858	6.28242	6.43337	6.1278	6.72674	6.65175	6.04086	6.48491	1.07351	0.102334	0.031434	0.0414253
sp|Q13148|TADBP_HUMAN	TARDBP	TADBP_HUMAN TAR DNA-binding protein 43	15	5.99147	5.80423	6.11307	6.41294	6.52721	6.24887	6.83111	6.50137	6.08043	6.52714	1.07347	0.102278	0.0420188	0.0365236
sp|Q9NWS1|PARI_HUMAN	PARPBP	PARI_HUMAN PCNA-interacting partner	1	6.77427	5.44744	5.91501	6.05175	6.11835	5.64151	6.79166	7.41342	6.04712	6.49123	1.07344	0.102245	0.0908691	0.119388
sp|Q69YN2|C19L1_HUMAN	CWF19L1	C19L1_HUMAN CWF19-like protein 1	22	5.62724	5.6822	6.16172	6.55136	6.06572	6.18961	6.84019	6.69064	6.00563	6.44654	1.07342	0.102209	0.0725784	0.0584258
sp|Q8WTW4|NPRL2_HUMAN	NPRL2	NPRL2_HUMAN Nitrogen permease regulator 2-like protein	3	5.77155	5.88685	6.8807	6.48963	6.32643	6.80993	6.65414	7.07569	6.25718	6.71655	1.07341	0.102207	0.0833393	0.046592
sp|Q8IUH3|RBM45_HUMAN	RBM45	RBM45_HUMAN RNA-binding protein 45	1	6.19504	5.54155	6.04155	5.56177	6.63468	7.34289	5.77896	5.29638	5.83498	6.26323	1.07339	0.102179	0.0571033	0.14496
sp|Q96ND0|F210A_HUMAN	FAM210A	F210A_HUMAN Protein FAM210A	1	6.50397	6.05492	6.42159	6.38008	6.77443	6.21572	8.14971	6.08148	6.34014	6.80533	1.07337	0.102151	0.0310709	0.138883
sp|Q8IUR0|TPPC5_HUMAN	TRAPPC5	TPPC5_HUMAN Trafficking protein particle complex subunit 5	6	5.68889	5.51934	6.09319	6.45022	5.85303	6.12029	6.57371	6.94716	5.93791	6.37355	1.07337	0.102141	0.0703692	0.0760148
sp|Q9P287-2|BCCIP_HUMAN	BCCIP	BCCIP_HUMAN Isoform 2 of BRCA2 and CDKN1A-interacting protein	24	5.9015	5.76458	6.22163	6.25895	6.23361	6.35795	6.59595	6.73042	6.03667	6.47948	1.07335	0.102127	0.0401146	0.0347116
sp|Q92499|DDX1_HUMAN	DDX1	DDX1_HUMAN ATP-dependent RNA helicase DDX1	43	5.92003	5.92992	6.12682	6.29366	6.5293	6.35971	6.60836	6.55238	6.06761	6.51244	1.07331	0.10207	0.029381	0.0164443
sp|Q16877|F264_HUMAN	PFKFB4	F264_HUMAN 6-phosphofructo-2-kinase/fructose-2,6-bisphosphatase 4	4	6.18292	5.51005	5.93797	6.31172	6.31765	5.94371	6.66404	6.77247	5.98567	6.42447	1.07331	0.102065	0.0589647	0.0583127
sp|O95568|MET18_HUMAN	METTL18	MET18_HUMAN Histidine protein methyltransferase 1 homolog	1	5.27731	6.15519	6.22877	6.01403	5.54898	6.26731	6.36213	7.232	5.91883	6.3526	1.07329	0.102038	0.0738086	0.108549
sp|Q9ULH1-2|ASAP1_HUMAN	ASAP1	ASAP1_HUMAN Isoform 1 of Arf-GAP with SH3 domain, ANK repeat and PH domain-containing protein 1	15	5.80986	5.7319	6.17455	6.2501	6.27439	6.03163	6.82661	6.58968	5.9916	6.43058	1.07327	0.102006	0.043176	0.0542947
sp|O15530|PDPK1_HUMAN	PDPK1	PDPK1_HUMAN 3-phosphoinositide-dependent protein kinase 1	8	5.66297	5.61572	6.71065	6.35177	6.26972	6.29224	6.79613	6.76625	6.08528	6.53108	1.07326	0.102	0.0880328	0.0442806
sp|Q86TB9|PATL1_HUMAN	PATL1	PATL1_HUMAN Protein PAT1 homolog 1	13	5.72377	5.81278	6.4054	6.53123	6.17473	6.17402	6.98194	6.93295	6.11829	6.56591	1.07316	0.101865	0.0668547	0.0689239
sp|Q9Y2L1|RRP44_HUMAN	DIS3	RRP44_HUMAN Exosome complex exonuclease RRP44	44	5.91373	5.80149	6.17663	6.36786	6.39166	6.27909	6.64673	6.71564	6.06493	6.50828	1.0731	0.101786	0.0421989	0.0317744
sp|Q7Z392|TPC11_HUMAN	TRAPPC11	TPC11_HUMAN Trafficking protein particle complex subunit 11	17	5.74107	5.78329	6.57901	6.54642	6.30516	6.36681	7.05231	6.72585	6.16245	6.61253	1.07304	0.101699	0.0750841	0.0524671
sp|Q12769|NU160_HUMAN	NUP160	NU160_HUMAN Nuclear pore complex protein Nup160	23	5.95551	5.81696	6.5314	6.39629	6.36276	6.4109	7.06315	6.66688	6.17504	6.62592	1.07302	0.101673	0.0554999	0.0483843
sp|P22102|PUR2_HUMAN	GART	PUR2_HUMAN Trifunctional purine biosynthetic protein adenosine-3	75	5.81608	5.73103	6.22924	6.44078	6.28151	6.27937	6.72523	6.699	6.05428	6.49628	1.07301	0.101657	0.0557052	0.0384003
sp|Q9Y619|ORNT1_HUMAN	SLC25A15	ORNT1_HUMAN Mitochondrial ornithine transporter 1	6	5.9994	5.59839	6.40914	6.419	6.16317	6.27298	7.00003	6.77231	6.10648	6.55212	1.07298	0.101621	0.0640478	0.0609412
sp|Q13200|PSMD2_HUMAN	PSMD2	PSMD2_HUMAN 26S proteasome non-ATPase regulatory subunit 2	63	6.01441	5.84732	6.1101	6.19169	6.4563	6.17784	6.69125	6.60018	6.04088	6.48139	1.07292	0.101545	0.0244977	0.0346059
sp|Q9BUP3-3|HTAI2_HUMAN	HTATIP2	HTAI2_HUMAN Isoform 3 of Oxidoreductase HTATIP2	14	5.69074	5.65018	6.4516	6.58388	6.32357	6.00851	6.92906	6.89176	6.0941	6.53823	1.07288	0.101486	0.080804	0.068651
sp|Q8N6T7|SIR6_HUMAN	SIRT6	SIR6_HUMAN NAD-dependent protein deacetylase sirtuin-6	6	5.0664	5.86301	6.65378	6.72095	6.27121	6.03706	7.14561	6.6212	6.07604	6.51877	1.07287	0.10147	0.127994	0.0739286
sp|Q7Z6J6|FRMD5_HUMAN	FRMD5	FRMD5_HUMAN FERM domain-containing protein 5	2	6.77488	6.30349	5.95332	6.25234	6.94729	6.43582	7.41423	6.3273	6.32101	6.78116	1.0728	0.101378	0.0537436	0.0739117
sp|Q06210|GFPT1_HUMAN	GFPT1	GFPT1_HUMAN Glutamine--fructose-6-phosphate aminotransferase [isomerizing] 1	30	6.14321	5.64681	6.27128	6.44157	6.4871	6.33622	6.69926	6.76362	6.12572	6.57155	1.07278	0.101355	0.0558077	0.0298856
sp|P38919|IF4A3_HUMAN	EIF4A3	IF4A3_HUMAN Eukaryotic initiation factor 4A-III	51	6.0416	5.73818	6.18653	6.26813	6.42676	6.14184	6.72105	6.70755	6.05861	6.4993	1.07274	0.101298	0.0385001	0.0421914
sp|Q8NB46|ANR52_HUMAN	ANKRD52	ANR52_HUMAN Serine/threonine-protein phosphatase 6 regulatory ankyrin repeat subunit C	6	5.75511	5.90561	6.26507	6.41127	6.31387	6.29934	6.84078	6.65295	6.08427	6.52673	1.07272	0.101278	0.0502019	0.0406888
sp|Q12874|SF3A3_HUMAN	SF3A3	SF3A3_HUMAN Splicing factor 3A subunit 3	22	5.94201	5.61994	6.11974	6.52749	6.24471	5.86677	6.86043	6.99541	6.05229	6.49183	1.07262	0.101143	0.062514	0.0815697
tr|B4E3L0|B4E3L0_HUMAN	SMU1	B4E3L0_HUMAN WD40 repeat-containing protein SMU1	2	5.52643	6.64812	6.20505	6.83721	6.89989	6.70313	6.9783	6.46679	6.3042	6.76203	1.07262	0.101142	0.0923632	0.0337676
sp|Q9NY33|DPP3_HUMAN	DPP3	DPP3_HUMAN Dipeptidyl peptidase 3	33	5.74675	5.83699	6.19584	6.2698	6.38911	6.11754	6.59462	6.69423	6.01234	6.44888	1.07261	0.10112	0.0430781	0.0395134
sp|Q3KQV9|UAP1L_HUMAN	UAP1L1	UAP1L_HUMAN UDP-N-acetylhexosamine pyrophosphorylase-like protein 1	10	5.56551	5.4855	6.38421	6.55426	5.88045	6.09795	7.07614	6.67633	5.99737	6.43272	1.07259	0.101098	0.0917466	0.0846914
sp|Q8IUH4|ZDH13_HUMAN	ZDHHC13	ZDH13_HUMAN Palmitoyltransferase ZDHHC13	4	6.058	5.77968	6.63819	6.9196	6.52679	6.57283	7.32926	6.80916	6.34887	6.80951	1.07256	0.101052	0.082248	0.0540298
sp|P50225|ST1A1_HUMAN	SULT1A1	ST1A1_HUMAN Sulfotransferase 1A1	6	5.83286	5.88734	6.49485	6.14884	6.23658	6.25931	6.87663	6.75777	6.09097	6.53257	1.0725	0.100979	0.0496668	0.0508761
sp|O94808|GFPT2_HUMAN	GFPT2	GFPT2_HUMAN Glutamine--fructose-6-phosphate aminotransferase [isomerizing] 2	10	5.93222	5.52862	6.76473	6.30682	6.22623	6.34158	6.90625	6.83675	6.1331	6.5777	1.07249	0.100968	0.0860147	0.0522484
sp|Q6STE5|SMRD3_HUMAN	SMARCD3	SMRD3_HUMAN SWI/SNF-related matrix-associated actin-dependent regulator of chromatin subfamily D member 3	2	5.52039	5.63386	6.32435	6.29195	6.07184	5.78217	7.08931	6.54874	5.94264	6.37301	1.07242	0.100873	0.0714831	0.0898544
sp|Q2VPK5|CTU2_HUMAN	CTU2	CTU2_HUMAN Cytoplasmic tRNA 2-thiolation protein 2	17	5.72244	5.89854	6.11131	6.25114	6.29441	6.13481	6.60544	6.68521	5.99586	6.42997	1.0724	0.100845	0.0388434	0.0402992
sp|P36383|CXG1_HUMAN	GJC1	CXG1_HUMAN Gap junction gamma-1 protein	1	5.99198	5.8247	5.91151	6.66066	7.07821	6.35127	6.10831	6.61664	6.09721	6.53861	1.07239	0.100834	0.0626175	0.0635205
sp|O95163|ELP1_HUMAN	IKBKAP	ELP1_HUMAN Elongator complex protein 1	48	5.99655	5.77727	6.30242	6.31921	6.30452	6.32373	6.80324	6.72766	6.09886	6.53979	1.0723	0.100704	0.0427441	0.0401405
sp|P42224|STAT1_HUMAN	STAT1	STAT1_HUMAN Signal transducer and activator of transcription 1-alpha/beta	27	5.8732	5.87234	6.55026	6.52927	6.56669	6.45423	6.80836	6.78955	6.20627	6.65471	1.07226	0.100649	0.0620639	0.0259884
sp|Q96ER9|CCD51_HUMAN	CCDC51	CCD51_HUMAN Coiled-coil domain-containing protein 51	13	5.59559	5.49843	5.8812	6.30475	5.87679	6.00433	6.51458	6.56632	5.81999	6.2405	1.07225	0.100645	0.062149	0.0562254
sp|P61020|RAB5B_HUMAN	RAB5B	RAB5B_HUMAN Ras-related protein Rab-5B	5	5.59601	6.1519	5.6003	6.62935	6.06914	7.07363	6.31856	6.24738	5.99439	6.42718	1.0722	0.100572	0.0829651	0.069012
sp|Q07617|SPAG1_HUMAN	SPAG1	SPAG1_HUMAN Sperm-associated antigen 1	12	5.96339	5.95802	6.34304	6.30248	6.47106	6.31344	6.75764	6.79786	6.14173	6.585	1.07217	0.100538	0.0341433	0.0352718
sp|Q6NUJ5|PWP2B_HUMAN	PWWP2B	PWP2B_HUMAN PWWP domain-containing protein 2B	1	7.4591	5.19274	5.11016	5.66763	7.4774	5.45841	4.42335	7.76134	5.85741	6.28012	1.07217	0.100531	0.18706	0.255935
sp|P25098|ARBK1_HUMAN	ADRBK1	ARBK1_HUMAN Beta-adrenergic receptor kinase 1	26	5.67169	5.70461	6.07832	6.37365	6.17215	6.25745	6.64072	6.47661	5.95707	6.38673	1.07213	0.100476	0.0559631	0.0332572
sp|Q8WWN8|ARAP3_HUMAN	ARAP3	ARAP3_HUMAN Arf-GAP with Rho-GAP domain, ANK repeat and PH domain-containing protein 3	6	5.77964	5.81064	6.47559	6.30949	6.06752	6.80537	6.78751	6.47032	6.09384	6.53268	1.07201	0.100323	0.0577205	0.0529949
sp|P11766|ADHX_HUMAN	ADH5	ADHX_HUMAN Alcohol dehydrogenase class-3	34	6.01735	6.0135	5.93455	6.16604	6.38608	6.2041	6.5576	6.72104	6.03286	6.4672	1.072	0.1003	0.0160187	0.0343916
sp|Q96TA1|NIBL1_HUMAN	FAM129B	NIBL1_HUMAN Niban-like protein 1	23	6.022	5.64848	6.38436	6.57612	6.34448	6.31349	6.95547	6.79006	6.15774	6.60087	1.07196	0.100256	0.0665743	0.0486876
sp|P07954|FUMH_HUMAN	FH	FUMH_HUMAN Fumarate hydratase, mitochondrial	37	5.69002	5.99616	5.83169	6.17941	6.01189	6.09951	6.51942	6.77102	5.92432	6.35046	1.07193	0.100212	0.0356353	0.0562661
sp|Q9Y6A9|SPCS1_HUMAN	SPCS1	SPCS1_HUMAN Signal peptidase complex subunit 1	2	6.24617	5.91286	6.1646	5.99442	6.95656	6.12233	6.54408	6.44369	6.07951	6.51666	1.07191	0.100178	0.0251309	0.0527934
sp|P03886|NU1M_HUMAN	MT-ND1	NU1M_HUMAN NADH-ubiquinone oxidoreductase chain 1	2	6.213	6.10929	5.78471	6.54502	6.4231	6.74752	5.93425	7.319	6.16301	6.60597	1.07187	0.100136	0.0508319	0.0879688
sp|Q15021|CND1_HUMAN	NCAPD2	CND1_HUMAN Condensin complex subunit 1	39	5.99271	5.90145	6.44486	6.50295	6.55944	6.45863	6.95042	6.65892	6.21049	6.65685	1.07187	0.100133	0.0494892	0.0318629
sp|Q8N8Q8|COX18_HUMAN	COX18	COX18_HUMAN Mitochondrial inner membrane protein COX18	1	5.25238	5.0846	6.08274	6.67015	5.22914	5.64809	6.8556	7.01548	5.77247	6.18708	1.07183	0.10007	0.12831	0.142786
sp|O95057|DIRA1_HUMAN	DIRAS1	DIRA1_HUMAN GTP-binding protein Di-Ras1	3	5.9031	5.6974	6.3832	6.21799	6.28464	6.16371	6.67322	6.81694	6.05042	6.48463	1.07176	0.0999878	0.0509553	0.0478619
sp|Q9UNE7|CHIP_HUMAN	STUB1	CHIP_HUMAN E3 ubiquitin-protein ligase CHIP	24	5.71617	5.74094	6.42612	6.5826	6.27711	6.00087	6.9435	6.99917	6.11646	6.55516	1.07173	0.0999352	0.07399	0.0753807
sp|Q9H0B6|KLC2_HUMAN	KLC2	KLC2_HUMAN Kinesin light chain 2	20	5.73341	5.51528	6.16724	6.5896	5.86369	6.07158	6.75644	7.03522	6.00138	6.43173	1.07171	0.0999125	0.079425	0.0861946
sp|Q9UL03|INT6_HUMAN	INTS6	INT6_HUMAN Integrator complex subunit 6	9	5.97115	5.95943	6.66362	6.4313	6.85255	6.26826	6.8364	6.8614	6.25638	6.70465	1.07165	0.0998356	0.0558269	0.0434195
sp|Q9Y570|PPME1_HUMAN	PPME1	PPME1_HUMAN Protein phosphatase methylesterase 1	36	5.67537	5.77845	6.38453	6.50689	6.19214	6.14106	6.7337	7.02164	6.08631	6.52214	1.07161	0.0997765	0.0690251	0.0655527
sp|Q9UK22|FBX2_HUMAN	FBXO2	FBX2_HUMAN F-box only protein 2	10	6.00359	5.63654	6.0571	6.13864	6.50889	6.45667	5.93113	6.6457	5.95897	6.3856	1.07159	0.0997592	0.0372561	0.0490615
sp|Q8TDN6|BRX1_HUMAN	BRIX1	BRX1_HUMAN Ribosome biogenesis protein BRX1 homolog	11	6.13071	5.76682	6.15359	6.26166	6.78332	6.57479	6.2958	6.39725	6.0782	6.51279	1.0715	0.0996327	0.0354209	0.0328676
tr|B4DUV4|B4DUV4_HUMAN	POFUT1	B4DUV4_HUMAN GDP-fucose protein O-fucosyltransferase 1	2	5.81204	6.33963	6.07067	6.69954	6.61359	6.50607	7.00933	6.57391	6.23047	6.67572	1.07146	0.0995835	0.0609457	0.0339725
sp|Q15428|SF3A2_HUMAN	SF3A2	SF3A2_HUMAN Splicing factor 3A subunit 2	11	5.79902	5.62949	6.1274	6.20112	6.32929	6.03808	6.62508	6.46233	5.93926	6.36369	1.07146	0.0995821	0.0455528	0.03905
sp|P35250|RFC2_HUMAN	RFC2	RFC2_HUMAN Replication factor C subunit 2	25	5.88475	5.92732	6.32357	6.50325	6.38026	6.3429	7.02348	6.65269	6.15972	6.59983	1.07145	0.0995641	0.0491057	0.047634
sp|Q9NRD1|FBX6_HUMAN	FBXO6	FBX6_HUMAN F-box only protein 6	7	6.11115	5.9002	6.37653	6.3102	6.48016	6.66744	6.66458	6.64834	6.17452	6.61513	1.07136	0.0994425	0.0347966	0.0136615
sp|Q9UBE0|SAE1_HUMAN	SAE1	SAE1_HUMAN SUMO-activating enzyme subunit 1	30	6.07574	6.04646	6.19329	6.37904	6.59173	6.2666	6.71351	6.88423	6.17363	6.61402	1.07133	0.0994073	0.0244466	0.0394371
sp|Q8TB36|GDAP1_HUMAN	GDAP1	GDAP1_HUMAN Ganglioside-induced differentiation-associated protein 1	4	6.15382	5.78245	6.44103	6.32558	6.25608	6.27714	7.15278	6.77855	6.17572	6.61614	1.07131	0.0993819	0.0465551	0.0652396
sp|Q9BV23|ABHD6_HUMAN	ABHD6	ABHD6_HUMAN Monoacylglycerol lipase ABHD6	7	5.46817	5.16999	5.77288	5.9619	6.06435	5.62964	6.41024	5.86405	5.59323	5.99207	1.07131	0.0993715	0.0621882	0.0551684
sp|Q7Z3K3|POGZ_HUMAN	POGZ	POGZ_HUMAN Pogo transposable element with ZNF domain	4	5.64179	6.53588	5.96457	6.23072	6.32268	6.35157	6.82755	6.6071	6.09324	6.52722	1.07122	0.0992602	0.0625076	0.0363914
sp|P08574|CY1_HUMAN	CYC1	CY1_HUMAN Cytochrome c1, heme protein, mitochondrial	20	5.77245	5.7269	6.31758	6.23086	6.2765	6.05598	6.74122	6.68626	6.01195	6.43999	1.0712	0.099226	0.0508113	0.0511545
sp|Q96J01|THOC3_HUMAN	THOC3	THOC3_HUMAN THO complex subunit 3	9	6.02774	5.92442	6.49561	6.36764	6.65451	6.30574	6.70405	6.91758	6.20385	6.64547	1.07118	0.0992069	0.0437542	0.0381648
sp|P54578|UBP14_HUMAN	USP14	UBP14_HUMAN Ubiquitin carboxyl-terminal hydrolase 14	33	5.78833	5.87207	6.19405	6.44995	6.23608	6.1673	6.76376	6.86638	6.0761	6.50838	1.07114	0.0991529	0.0501103	0.0549612
sp|Q9NZJ0|DTL_HUMAN	DTL	DTL_HUMAN Denticleless protein homolog	7	5.99396	5.86196	6.37731	6.46354	6.61414	6.45609	6.79373	6.58767	6.17419	6.61291	1.07106	0.0990343	0.0472159	0.021013
sp|O60488|ACSL4_HUMAN	ACSL4	ACSL4_HUMAN Long-chain-fatty-acid--CoA ligase 4	23	5.88566	5.59996	6.5449	6.61676	6.25335	6.19807	7.03474	6.91192	6.16182	6.59952	1.07103	0.0990046	0.0809104	0.0659331
sp|P51812|KS6A3_HUMAN	RPS6KA3	KS6A3_HUMAN Ribosomal protein S6 kinase alpha-3	15	5.86857	5.88276	6.49637	6.44518	6.36185	6.41454	6.85853	6.81045	6.17322	6.61134	1.07097	0.09892	0.0557684	0.0392218
sp|Q5W0V3|F16B1_HUMAN	FAM160B1	F16B1_HUMAN Protein FAM160B1	13	5.68688	5.6124	6.41843	6.52915	6.13993	6.32664	6.71669	6.78224	6.06171	6.49137	1.07088	0.0987981	0.0790093	0.0475665
sp|P14866|HNRPL_HUMAN	HNRNPL	HNRPL_HUMAN Heterogeneous nuclear ribonucleoprotein L	30	5.73378	5.86818	6.04113	6.30601	6.17079	6.44453	6.4358	6.59525	5.98728	6.41159	1.07087	0.0987832	0.0412439	0.027518
sp|P49770|EI2BB_HUMAN	EIF2B2	EI2BB_HUMAN Translation initiation factor eIF-2B subunit beta	8	6.21211	6.0603	6.2417	6.14369	6.53748	6.41606	6.72775	6.72342	6.16445	6.60118	1.07085	0.0987512	0.0130844	0.0230225
sp|Q9HD26|GOPC_HUMAN	GOPC	GOPC_HUMAN Golgi-associated PDZ and coiled-coil motif-containing protein	20	6.2297	6.08331	6.05939	6.05139	6.65155	6.55967	6.37868	6.56362	6.10595	6.53838	1.07082	0.098718	0.013693	0.0175278
sp|Q8TBK6|ZCH10_HUMAN	ZCCHC10	ZCH10_HUMAN Zinc finger CCHC domain-containing protein 10	1	5.20213	6.25446	6.35019	6.26632	6.51865	5.57302	6.77776	6.90786	6.01828	6.44432	1.07079	0.0986787	0.0906842	0.093567
sp|Q5PRF9|SMAG2_HUMAN	SAMD4B	SMAG2_HUMAN Protein Smaug homolog 2	3	5.87711	5.53459	6.06556	6.46616	5.73679	6.18047	7.11342	6.60519	5.98586	6.40897	1.07069	0.0985346	0.0648826	0.0918153
sp|Q7L576|CYFP1_HUMAN	CYFIP1	CYFP1_HUMAN Cytoplasmic FMR1-interacting protein 1	26	5.79481	5.73231	6.25592	6.35564	6.22142	6.04961	6.77691	6.79615	6.03467	6.46102	1.07065	0.0984876	0.0524828	0.0591908
sp|Q13615|MTMR3_HUMAN	MTMR3	MTMR3_HUMAN Myotubularin-related protein 3	10	5.71828	5.61588	6.36659	6.98553	6.18394	6.47194	6.85857	6.91591	6.17157	6.60759	1.07065	0.0984866	0.10311	0.0521291
sp|Q9H4I3|TRABD_HUMAN	TRABD	TRABD_HUMAN TraB domain-containing protein	5	5.69532	5.94571	6.41605	6.5756	6.2512	6.61272	6.88653	6.62162	6.15817	6.59302	1.07061	0.0984372	0.0663017	0.0395711
sp|Q6PI26|SHQ1_HUMAN	SHQ1	SHQ1_HUMAN Protein SHQ1 homolog	3	5.86624	6.38587	6.26502	6.26311	6.78355	6.64695	6.87257	6.22647	6.19506	6.63238	1.07059	0.0984095	0.0365791	0.0431332
sp|Q9NUY8|TBC23_HUMAN	TBC1D23	TBC23_HUMAN TBC1 domain family member 23	10	5.86704	5.9147	6.56972	6.4529	6.38358	6.39837	6.94169	6.83126	6.20109	6.63872	1.07057	0.0983844	0.05836	0.0436335
sp|Q9H270|VPS11_HUMAN	VPS11	VPS11_HUMAN Vacuolar protein sorting-associated protein 11 homolog	12	5.80961	6.08848	6.29829	6.55225	6.34318	6.54824	6.90444	6.69706	6.18716	6.62323	1.07048	0.0982582	0.0509331	0.035791
sp|Q8IUI8|CRLF3_HUMAN	CRLF3	CRLF3_HUMAN Cytokine receptor-like factor 3	5	6.17671	5.44087	5.94877	6.40106	6.46816	6.24297	6.16267	6.7825	5.99185	6.41408	1.07047	0.0982391	0.0686133	0.0432759
sp|Q9P0J1-2|PDP1_HUMAN	PDP1	PDP1_HUMAN Isoform 2 of [Pyruvate dehydrogenase [acetyl-transferring]]-phosphatase 1, mitochondrial	34	5.83221	5.89427	6.1919	6.40544	6.2402	6.29977	6.68308	6.8146	6.08095	6.50941	1.07046	0.0982294	0.0439545	0.0434265
sp|P51553|IDH3G_HUMAN	IDH3G	IDH3G_HUMAN Isocitrate dehydrogenase [NAD] subunit gamma, mitochondrial	12	6.01831	6.02544	5.82168	6.07119	6.51	6.42264	6.35367	6.3353	5.98415	6.4054	1.07039	0.0981417	0.0185192	0.012368
sp|Q6UB35|C1TM_HUMAN	MTHFD1L	C1TM_HUMAN Monofunctional C1-tetrahydrofolate synthase, mitochondrial	47	6.07532	5.93189	6.52051	6.56078	6.53028	6.4274	6.99588	6.90054	6.27213	6.71352	1.07037	0.0981162	0.0503767	0.0412562
sp|P05023|AT1A1_HUMAN	ATP1A1	AT1A1_HUMAN Sodium/potassium-transporting ATPase subunit alpha-1	39	6.12353	5.99155	6.13279	6.17832	6.25364	6.50213	6.72778	6.66131	6.10655	6.53622	1.07036	0.0980985	0.0131527	0.0322567
sp|Q8TF42|UBS3B_HUMAN	UBASH3B	UBS3B_HUMAN Ubiquitin-associated and SH3 domain-containing protein B	10	6.06749	5.85146	6.34708	6.29041	6.3187	6.54899	6.65667	6.75989	6.13911	6.57106	1.07036	0.0980971	0.0369076	0.0287619
sp|Q92547|TOPB1_HUMAN	TOPBP1	TOPB1_HUMAN DNA topoisomerase 2-binding protein 1	14	5.69648	5.5148	6.49155	6.44494	6.2015	6.409	6.60575	6.62935	6.03694	6.4614	1.07031	0.0980287	0.0834657	0.0308675
sp|Q9HCI5|MAGE1_HUMAN	MAGEE1	MAGE1_HUMAN Melanoma-associated antigen E1	2	4.76411	5.33867	6.39017	6.40796	5.44335	6.40509	6.14218	6.51909	5.72523	6.12743	1.07025	0.0979485	0.141951	0.0787588
sp|Q9GZS9-2|CHST5_HUMAN	CHST5	CHST5_HUMAN Isoform 2 of Carbohydrate sulfotransferase 5	1	5.22136	5.6892	6.76219	6.55115	6.24838	6.57324	6.85648	6.24632	6.05598	6.48111	1.0702	0.0978806	0.119647	0.0453077
sp|P07814|SYEP_HUMAN	EPRS	SYEP_HUMAN Bifunctional glutamate/proline--tRNA ligase	111	5.98168	5.67315	6.3198	6.44606	6.37571	6.17115	6.90063	6.68478	6.10517	6.53307	1.07009	0.0977285	0.0570676	0.04951
sp|P13639|EF2_HUMAN	EEF2	EF2_HUMAN Elongation factor 2	266	5.8158	5.85228	5.915	6.16551	6.17338	6.21768	6.48214	6.53931	5.93715	6.35313	1.07006	0.097697	0.0265544	0.0290184
sp|Q9NP80|PLPL8_HUMAN	PNPLA8	PLPL8_HUMAN Calcium-independent phospholipase A2-gamma	2	5.76308	5.2015	6.58939	6.82289	6.37509	6.89609	7.13409	5.67832	6.09422	6.5209	1.07001	0.0976301	0.122894	0.0989086
sp|Q8N392|RHG18_HUMAN	ARHGAP18	RHG18_HUMAN Rho GTPase-activating protein 18	35	5.96278	5.85975	6.37608	6.44891	6.30738	6.21218	6.88381	6.96851	6.16188	6.59297	1.06996	0.0975579	0.047702	0.0588863
sp|P42704|LPPRC_HUMAN	LRPPRC	LPPRC_HUMAN Leucine-rich PPR motif-containing protein, mitochondrial	125	5.94377	5.72131	6.36987	6.41221	6.41533	6.23586	6.75409	6.75096	6.11179	6.53906	1.06991	0.0974883	0.0548843	0.0393253
sp|P47755|CAZA2_HUMAN	CAPZA2	CAZA2_HUMAN F-actin-capping protein subunit alpha-2	17	5.61577	5.83707	5.94063	6.29879	6.0207	6.25308	6.4668	6.60523	5.92307	6.33645	1.06979	0.0973314	0.0480803	0.0403265
sp|Q9H063|MAF1_HUMAN	MAF1	MAF1_HUMAN Repressor of RNA polymerase III transcription MAF1 homolog	6	5.30373	5.21402	5.94493	6.74014	5.85633	5.96682	6.53708	6.46138	5.8007	6.2054	1.06977	0.0972965	0.121677	0.0553809
sp|Q99986|VRK1_HUMAN	VRK1	VRK1_HUMAN Serine/threonine-protein kinase VRK1	12	6.05747	5.59274	6.39832	6.26789	6.31987	6.2992	6.86801	6.5257	6.07911	6.50319	1.06976	0.0972897	0.0581244	0.0405693
sp|O94855-2|SC24D_HUMAN	SEC24D	SC24D_HUMAN Isoform 2 of Protein transport protein Sec24D	22	5.74607	5.93653	6.12379	6.3932	5.89991	6.39506	6.73934	6.85324	6.0499	6.47189	1.06975	0.0972758	0.0456158	0.0661604
sp|P51798|CLCN7_HUMAN	CLCN7	CLCN7_HUMAN H(+)/Cl(-) exchange transporter 7	4	6.03764	6.05317	6.2059	6.23159	6.45621	6.3209	6.7523	6.70947	6.13207	6.55972	1.06974	0.0972589	0.0164423	0.031398
sp|Q9NWZ8|GEMI8_HUMAN	GEMIN8	GEMI8_HUMAN Gem-associated protein 8	1	5.14305	6.32958	5.81281	7.76311	7.13922	7.01305	6.46683	6.1749	6.26214	6.6985	1.06968	0.0971829	0.177625	0.0679218
sp|Q8IXM6|NRM_HUMAN	NRM	NRM_HUMAN Nurim	1	4.93717	6.76681	6.62065	7.30774	7.10531	7.1657	6.02423	7.12175	6.40809	6.85425	1.06962	0.0971033	0.159826	0.0808159
sp|Q2PZI1|D19L1_HUMAN	DPY19L1	D19L1_HUMAN Probable C-mannosyltransferase DPY19L1	6	5.9393	6.23669	7.16386	6.31923	6.20776	6.64481	7.62452	6.96691	6.41477	6.861	1.06956	0.0970213	0.0819004	0.086949
sp|P35998|PRS7_HUMAN	PSMC2	PRS7_HUMAN 26S protease regulatory subunit 7	38	5.89139	5.78066	6.19269	6.29083	6.31513	6.2679	6.7727	6.47999	6.03889	6.45893	1.06956	0.0970112	0.0400593	0.0353129
sp|Q9C040-2|TRIM2_HUMAN	TRIM2	TRIM2_HUMAN Isoform 2 of Tripartite motif-containing protein 2	6	5.16294	5.34341	6.35422	6.48926	6.09009	5.90766	6.27502	6.70069	5.83746	6.24337	1.06953	0.0969837	0.116646	0.0544216
sp|O75943|RAD17_HUMAN	RAD17	RAD17_HUMAN Cell cycle checkpoint protein RAD17	5	5.67706	5.76534	6.36856	6.3494	6.46246	6.33358	6.42499	6.6184	6.04009	6.45986	1.0695	0.0969323	0.0612681	0.0183827
sp|Q9UIY3|RWD2A_HUMAN	RWDD2A	RWD2A_HUMAN RWD domain-containing protein 2A	2	5.80787	5.72568	6.26379	6.93441	6.64006	6.47744	6.81146	6.52153	6.18294	6.61262	1.0695	0.0969301	0.0896141	0.0225763
sp|Q5SVS4|KMCP1_HUMAN	SLC25A30	KMCP1_HUMAN Kidney mitochondrial carrier protein 1	2	5.74739	5.58343	6.33878	6.52704	5.89406	6.49531	7.01856	6.46986	6.04916	6.46945	1.06948	0.0969077	0.0751652	0.0710174
sp|Q9ULX6|AKP8L_HUMAN	AKAP8L	AKP8L_HUMAN A-kinase anchor protein 8-like	9	6.22763	5.84225	6.00228	6.17928	6.22208	6.55383	6.74484	6.41481	6.06286	6.48389	1.06944	0.0968611	0.0290469	0.0340589
sp|Q567U6|CCD93_HUMAN	CCDC93	CCD93_HUMAN Coiled-coil domain-containing protein 93	19	5.7963	5.69804	6.18894	6.43375	6.06815	6.08425	6.86294	6.77522	6.02926	6.44764	1.06939	0.0967908	0.0569005	0.06676
sp|Q9BV94|EDEM2_HUMAN	EDEM2	EDEM2_HUMAN ER degradation-enhancing alpha-mannosidase-like protein 2	3	5.20406	5.44731	6.05019	6.46168	6.19152	6.03935	6.2864	6.252	5.79081	6.19232	1.06934	0.0967143	0.0986796	0.0176444
sp|Q96AE4|FUBP1_HUMAN	FUBP1	FUBP1_HUMAN Far upstream element-binding protein 1	5	5.55766	6.07359	5.97049	5.63324	6.06354	6.78963	6.13545	5.85498	5.80875	6.2109	1.06923	0.0965758	0.0433416	0.0650049
sp|Q13889|TF2H3_HUMAN	GTF2H3	TF2H3_HUMAN General transcription factor IIH subunit 3	6	5.94466	6.02314	6.46639	6.30288	6.64707	6.27339	6.9831	6.54453	6.18427	6.61202	1.06917	0.0964889	0.0392809	0.0443654
sp|Q8NAV1|PR38A_HUMAN	PRPF38A	PR38A_HUMAN Pre-mRNA-splicing factor 38A	3	6.35269	6.01833	6.23807	5.95662	6.58373	6.63411	6.76635	6.28016	6.14143	6.56609	1.06915	0.0964599	0.0302117	0.0313104
sp|Q9BQA9|CQ062_HUMAN	C17orf62	CQ062_HUMAN Uncharacterized protein C17orf62	2	6.4139	5.73703	6.50108	6.14555	6.72646	6.43772	6.79801	6.54965	6.19939	6.62796	1.06913	0.0964386	0.0553876	0.0247827
sp|Q86W34|AMZ2_HUMAN	AMZ2	AMZ2_HUMAN Archaemetzincin-2	2	5.77222	5.50543	6.39107	6.56579	6.35544	5.83935	6.83772	6.877	6.05863	6.47738	1.06912	0.0964188	0.0828448	0.075184
sp|Q6P1N0-2|C2D1A_HUMAN	CC2D1A	C2D1A_HUMAN Isoform 2 of Coiled-coil and C2 domain-containing protein 1A	1	5.48433	6.30141	6.42519	6.22489	5.85044	6.44579	6.92181	6.90634	6.10895	6.53109	1.0691	0.0963993	0.0694907	0.0772698
sp|P26640|SYVC_HUMAN	VARS	SYVC_HUMAN Valine--tRNA ligase	78	6.02342	5.78892	6.41518	6.50706	6.4562	6.25862	6.89287	6.83604	6.18364	6.61093	1.0691	0.0963963	0.0544168	0.0460657
sp|Q9UI26-2|IPO11_HUMAN	IPO11	IPO11_HUMAN Isoform 2 of Importin-11	19	5.93823	6.13319	6.42994	6.40666	6.38598	6.70706	6.79455	6.74124	6.227	6.65721	1.06909	0.0963787	0.0377361	0.0276944
sp|Q9NTJ5|SAC1_HUMAN	SACM1L	SAC1_HUMAN Phosphatidylinositide phosphatase SAC1	24	6.14513	5.99726	6.55956	6.55264	6.3504	6.6824	7.07626	6.88976	6.31365	6.7497	1.06907	0.0963507	0.0453634	0.0460812
sp|Q15042|RB3GP_HUMAN	RAB3GAP1	RB3GP_HUMAN Rab3 GTPase-activating protein catalytic subunit	24	5.90026	5.80231	6.22043	6.38348	6.52043	6.25241	6.55104	6.66027	6.07662	6.49604	1.06902	0.0962909	0.0446851	0.0266553
sp|O75607|NPM3_HUMAN	NPM3	NPM3_HUMAN Nucleoplasmin-3	7	5.74108	5.94451	6.38467	6.24952	5.9713	6.73167	6.68322	6.6117	6.07995	6.49947	1.069	0.0962644	0.0479321	0.0547039
sp|P62736|ACTA_HUMAN	ACTA2	ACTA_HUMAN Actin, aortic smooth muscle	156	5.58418	5.74144	5.86654	6.37328	6.14064	6.19501	6.39785	6.45679	5.89136	6.29757	1.06895	0.0961951	0.0579523	0.0243513
sp|Q92614|MY18A_HUMAN	MYO18A	MY18A_HUMAN Unconventional myosin-XVIIIa	27	5.62471	5.77092	6.36496	6.45814	6.16606	5.95495	6.79464	6.97295	6.05468	6.47215	1.06895	0.0961937	0.0690556	0.075482
sp|Q9NX20|RM16_HUMAN	MRPL16	RM16_HUMAN 39S ribosomal protein L16, mitochondrial	5	5.91738	5.87207	6.42374	6.29453	6.38129	6.5529	6.83631	6.42612	6.12693	6.54916	1.06891	0.0961444	0.044703	0.0312661
sp|Q9UHA3|RLP24_HUMAN	RSL24D1	RLP24_HUMAN Probable ribosome biogenesis protein RLP24	1	6.00374	5.66989	6.07666	6.08742	7.0607	6.84302	5.72959	5.84648	5.95943	6.36995	1.06889	0.0961077	0.032985	0.106667
sp|P49590|SYHM_HUMAN	HARS2	SYHM_HUMAN Probable histidine--tRNA ligase, mitochondrial	23	5.49901	5.94229	6.02661	6.30095	6.11732	6.06976	6.4911	6.72704	5.94222	6.3513	1.06884	0.0960522	0.0560041	0.0493507
sp|Q15418-2|KS6A1_HUMAN	RPS6KA1	KS6A1_HUMAN Isoform 2 of Ribosomal protein S6 kinase alpha-1	26	5.96657	5.76417	6.40492	6.41241	6.46164	6.3545	6.69559	6.72616	6.13702	6.55947	1.06884	0.0960421	0.0528574	0.0275395
sp|Q96Q11|TRNT1_HUMAN	TRNT1	TRNT1_HUMAN CCA tRNA nucleotidyltransferase 1, mitochondrial	12	5.70799	5.62412	6.40941	6.4218	6.02769	6.07509	7.02527	6.69825	6.04083	6.45657	1.06882	0.0960223	0.0718667	0.0754157
sp|A2RU49|HYKK_HUMAN	HYKK	HYKK_HUMAN Hydroxylysine kinase	1	6.0674	5.09986	5.73788	6.69199	5.91598	5.75805	6.97266	6.5735	5.89928	6.30505	1.06878	0.0959677	0.112517	0.0901089
sp|Q9Y277|VDAC3_HUMAN	VDAC3	VDAC3_HUMAN Voltage-dependent anion-selective channel protein 3	28	6.06984	5.9641	6.40555	6.15966	6.56836	6.40922	6.63346	6.67963	6.14979	6.57267	1.06876	0.0959424	0.0306208	0.0179743
sp|Q9Y6C9|MTCH2_HUMAN	MTCH2	MTCH2_HUMAN Mitochondrial carrier homolog 2	8	6.19342	5.85779	6.43725	6.60065	6.68697	6.01207	7.14355	6.97132	6.27228	6.70348	1.06875	0.0959203	0.0515027	0.0742752
tr|R4GN35|R4GN35_HUMAN	DENND4C	R4GN35_HUMAN DENN domain-containing protein 4C	10	6.03055	5.72651	6.05265	6.23819	6.15179	6.32727	6.67771	6.54356	6.01197	6.42508	1.06871	0.095876	0.0352408	0.0361802
sp|Q9UKD2|MRT4_HUMAN	MRTO4	MRT4_HUMAN mRNA turnover protein 4 homolog	10	6.19973	5.99475	6.05575	5.95634	6.62787	6.59873	6.34446	6.2985	6.05164	6.46739	1.0687	0.0958568	0.0176603	0.0262766
sp|P52798-3|EFNA4_HUMAN	EFNA4	EFNA4_HUMAN Isoform 3 of Ephrin-A4	1	5.27536	6.47694	5.56508	6.13712	5.91515	7.00057	6.4922	5.65532	5.86362	6.26581	1.06859	0.0957082	0.0926882	0.0960581
sp|Q9GZQ3|COMD5_HUMAN	COMMD5	COMD5_HUMAN COMM domain-containing protein 5	5	6.09144	6.13675	5.90943	6.17469	6.08372	6.57041	6.71068	6.61504	6.07808	6.49496	1.06859	0.0957061	0.0193267	0.0431621
sp|P31268|HXA7_HUMAN	HOXA7	HXA7_HUMAN Homeobox protein Hox-A7	1	5.88606	4.93301	6.83117	7.11345	6.86274	6.21448	6.1697	7.21395	6.19092	6.61522	1.06854	0.0956342	0.159802	0.077022
sp|P63272|SPT4H_HUMAN	SUPT4H1	SPT4H_HUMAN Transcription elongation factor SPT4	3	5.70056	5.06735	5.20534	6.36003	5.5439	5.68736	6.09167	6.54096	5.58332	5.96597	1.06853	0.0956341	0.104748	0.0750968
sp|P54136|SYRC_HUMAN	RARS	SYRC_HUMAN Arginine--tRNA ligase, cytoplasmic	60	6.08445	5.73431	6.52081	6.44568	6.63048	6.1467	6.88472	6.82007	6.19631	6.62049	1.06846	0.0955286	0.0584449	0.0504161
tr|H0YJ03|H0YJ03_HUMAN	PSMA3	H0YJ03_HUMAN Proteasome subunit alpha type-3 (Fragment)	1	6.68615	6.53483	5.35508	5.68821	7.03218	6.88137	6.19171	5.81928	6.06607	6.48114	1.06842	0.0954849	0.106518	0.0884405
sp|P14635|CCNB1_HUMAN	CCNB1	CCNB1_HUMAN G2/mitotic-specific cyclin-B1	14	6.14868	5.88451	6.30991	6.47597	6.50661	6.63059	6.76084	6.61902	6.20477	6.62927	1.06841	0.0954718	0.0405931	0.0156916
sp|O14939|PLD2_HUMAN	PLD2	PLD2_HUMAN Phospholipase D2	4	5.60434	5.49302	6.53289	6.48595	6.1272	6.50883	6.55177	6.57766	6.02905	6.44136	1.06839	0.0954358	0.0923648	0.0328126
sp|O15371|EIF3D_HUMAN	EIF3D	EIF3D_HUMAN Eukaryotic translation initiation factor 3 subunit D	43	6.16233	5.68929	5.91261	6.20915	6.30745	6.10833	6.66757	6.52908	5.99335	6.40311	1.06837	0.0954108	0.0401942	0.0384512
sp|Q86SQ7|SDCG8_HUMAN	SDCCAG8	SDCG8_HUMAN Serologically defined colon cancer antigen 8	2	5.76137	6.38984	7.6277	6.17854	6.66244	6.4423	7.23529	7.39204	6.48936	6.93302	1.06837	0.0954066	0.123673	0.0653639
sp|Q9NYG5|APC11_HUMAN	ANAPC11	APC11_HUMAN Anaphase-promoting complex subunit 11	1	6.15155	5.97454	5.61723	5.6245	6.20735	5.55416	5.73582	7.46789	5.84196	6.24131	1.06836	0.0953965	0.0454197	0.138243
tr|E7EW49|E7EW49_HUMAN	CLASP2	E7EW49_HUMAN CLIP-associating protein 2	8	6.11539	6.03922	6.50753	6.04553	6.61081	6.45813	6.64521	6.68239	6.17692	6.59914	1.06835	0.0953899	0.0361175	0.0149175
sp|P17612|KAPCA_HUMAN	PRKACA	KAPCA_HUMAN cAMP-dependent protein kinase catalytic subunit alpha	4	5.67655	5.128	6.08699	6.46278	5.80131	6.18364	6.57434	6.39051	5.83858	6.23745	1.06832	0.0953388	0.0980169	0.0531757
sp|O94817|ATG12_HUMAN	ATG12	ATG12_HUMAN Ubiquitin-like protein ATG12	2	6.24166	5.98833	6.60647	6.56043	6.87853	6.27829	7.13556	6.8392	6.34922	6.78289	1.0683	0.0953212	0.0457018	0.0532461
tr|Q5JX45|Q5JX45_HUMAN	CPNE1	Q5JX45_HUMAN Copine-1 (Fragment)	2	5.614	4.9771	6.83078	6.76131	6.45562	6.41882	6.57126	6.38901	6.0458	6.45868	1.06829	0.0953061	0.14968	0.0123627
sp|P35249|RFC4_HUMAN	RFC4	RFC4_HUMAN Replication factor C subunit 4	18	6.13979	5.86479	6.24075	6.2053	6.43711	6.24813	6.74721	6.68756	6.11266	6.53	1.06828	0.0952838	0.0278856	0.0353754
sp|Q9P2E5|CHPF2_HUMAN	CHPF2	CHPF2_HUMAN Chondroitin sulfate glucuronyltransferase	2	5.46537	5.27631	6.7263	6.56093	6.38894	6.2178	6.59301	6.46889	6.00723	6.41716	1.06824	0.0952357	0.123511	0.0244976
sp|Q9H8H0|NOL11_HUMAN	NOL11	NOL11_HUMAN Nucleolar protein 11	11	5.86531	5.55982	6.15257	6.44057	5.85863	6.52716	6.75665	6.5143	6.00457	6.41418	1.06822	0.0952056	0.062992	0.0602949
sp|Q9UH65|SWP70_HUMAN	SWAP70	SWP70_HUMAN Switch-associated protein 70	37	5.83816	5.94089	5.95906	6.21036	6.0121	6.36703	6.54969	6.65164	5.98712	6.39512	1.06815	0.0951087	0.0264002	0.043968
sp|Q9P2K3-3|RCOR3_HUMAN	RCOR3	RCOR3_HUMAN Isoform 3 of REST corepressor 3	10	5.48514	5.75605	6.24474	6.31624	6.11292	6.22097	6.5765	6.51281	5.95054	6.3558	1.0681	0.0950525	0.0668496	0.0352437
sp|Q8WUJ1|NEUFC_HUMAN	CYB5D2	NEUFC_HUMAN Neuferricin	1	5.18747	5.84215	5.55218	6.62092	5.91383	6.40057	5.79874	6.6693	5.80068	6.19561	1.06808	0.0950243	0.104971	0.06611
sp|Q9UNF1|MAGD2_HUMAN	MAGED2	MAGD2_HUMAN Melanoma-associated antigen D2	17	5.63039	5.51904	6.44644	6.66365	6.20659	6.11714	6.93393	6.65199	6.06488	6.47741	1.06802	0.0949385	0.0947585	0.0592601
sp|Q9H098-2|F107B_HUMAN	FAM107B	F107B_HUMAN Isoform 2 of Protein FAM107B	3	6.27319	6.56493	5.83987	5.5691	6.57486	6.68639	6.44309	6.19166	6.06177	6.474	1.068	0.0949177	0.0731482	0.0328823
sp|Q92888-3|ARHG1_HUMAN	ARHGEF1	ARHG1_HUMAN Isoform 3 of Rho guanine nucleotide exchange factor 1	34	5.91909	5.77886	6.29868	6.44304	6.26737	6.46017	6.83715	6.5364	6.10992	6.52527	1.06798	0.0948853	0.0511156	0.0362811
sp|Q9Y4D8|HECD4_HUMAN	HECTD4	HECD4_HUMAN Probable E3 ubiquitin-protein ligase HECTD4	3	6.16679	5.47304	6.22559	6.51484	6.40309	6.71323	6.72915	6.19182	6.09506	6.50932	1.06797	0.0948658	0.0724691	0.0398634
sp|P61011|SRP54_HUMAN	SRP54	SRP54_HUMAN Signal recognition particle 54 kDa protein	32	5.81372	5.8985	6.24029	6.38203	6.29884	6.37207	6.69605	6.61928	6.08364	6.49656	1.06787	0.0947424	0.0445848	0.0294008
sp|Q8IZ52|CHSS2_HUMAN	CHPF	CHSS2_HUMAN Chondroitin sulfate synthase 2	6	5.75778	5.96519	6.46019	6.42828	6.45403	6.26058	6.83755	6.72854	6.15286	6.57017	1.06782	0.0946746	0.0564269	0.0398748
sp|Q6NUI2-4|GPAT2_HUMAN	GPAT2	GPAT2_HUMAN Isoform 3 of Glycerol-3-phosphate acyltransferase 2, mitochondrial	3	6.09255	5.66854	6.55053	6.64859	6.8225	6.35385	6.9789	6.4963	6.24005	6.66289	1.06776	0.0945894	0.0723626	0.043204
sp|Q13451|FKBP5_HUMAN	FKBP5	FKBP5_HUMAN Peptidyl-prolyl cis-trans isomerase FKBP5	32	5.86907	5.75571	6.09866	6.39899	6.13447	6.2907	6.68696	6.6446	6.03061	6.43918	1.06775	0.0945742	0.0470962	0.0419103
sp|Q96NB2|SFXN2_HUMAN	SFXN2	SFXN2_HUMAN Sideroflexin-2	3	5.43434	6.0451	6.68704	6.40222	6.57427	6.00224	6.71181	6.9427	6.14217	6.55776	1.06766	0.0944524	0.0879245	0.0610464
sp|P06400|RB_HUMAN	RB1	RB_HUMAN Retinoblastoma-associated protein	24	5.90419	5.83925	6.51138	6.49622	6.36005	6.49499	6.799	6.76917	6.18776	6.6058	1.06756	0.0943166	0.0591402	0.0323131
sp|Q86X27|RGPS2_HUMAN	RALGPS2	RGPS2_HUMAN Ras-specific guanine nucleotide-releasing factor RalGPS2	3	5.13702	6.24096	6.28787	7.08729	6.89792	7.03792	6.13836	6.34949	6.18828	6.60592	1.06749	0.0942204	0.12948	0.0651844
sp|Q9P287|BCCIP_HUMAN	BCCIP	BCCIP_HUMAN BRCA2 and CDKN1A-interacting protein	9	6.07819	5.9229	6.26719	6.2979	6.23729	6.39877	6.92626	6.66097	6.14155	6.55582	1.06745	0.0941752	0.0285221	0.0461329
sp|Q6P5W5|S39A4_HUMAN	SLC39A4	S39A4_HUMAN Zinc transporter ZIP4	2	5.57427	5.30561	5.27395	6.54337	5.3097	5.89216	5.95343	7.07216	5.6743	6.05686	1.06742	0.0941282	0.10483	0.121583
sp|P20393|NR1D1_HUMAN	NR1D1	NR1D1_HUMAN Nuclear receptor subfamily 1 group D member 1	2	4.98315	5.76642	6.11715	7.83569	6.68689	5.52719	7.58438	6.56777	6.1756	6.59156	1.06735	0.0940395	0.194957	0.127779
sp|P61764|STXB1_HUMAN	STXBP1	STXB1_HUMAN Syntaxin-binding protein 1	12	5.78731	5.75637	6.48699	6.25646	6.19948	6.44	6.79575	6.48669	6.07178	6.48048	1.06731	0.0939806	0.0591466	0.0378015
sp|Q96J02|ITCH_HUMAN	ITCH	ITCH_HUMAN E3 ubiquitin-protein ligase Itchy homolog	22	5.6257	5.93935	6.56759	6.44433	6.27731	6.22295	6.95559	6.77473	6.14424	6.55765	1.06728	0.0939426	0.0715712	0.0554104
sp|O95363|SYFM_HUMAN	FARS2	SYFM_HUMAN Phenylalanine--tRNA ligase, mitochondrial	5	6.43454	5.51239	6.80995	6.02472	6.49999	6.40933	6.7171	6.82141	6.1954	6.61196	1.06724	0.09388	0.0898932	0.028765
sp|P04083|ANXA1_HUMAN	ANXA1	ANXA1_HUMAN Annexin A1	84	5.75851	5.55283	6.02843	6.38697	5.97912	5.74968	6.81302	6.78014	5.93168	6.33049	1.06723	0.0938752	0.0607974	0.0863203
sp|Q9NYU1|UGGG2_HUMAN	UGGT2	UGGG2_HUMAN UDP-glucose:glycoprotein glucosyltransferase 2	8	5.60408	5.91782	6.0218	7.00922	6.50377	6.3085	6.84213	6.54923	6.13823	6.55091	1.06723	0.0938721	0.0989211	0.0336521
sp|Q9H9Q2|CSN7B_HUMAN	COPS7B	CSN7B_HUMAN COP9 signalosome complex subunit 7b	7	5.82922	5.57577	6.00399	6.31676	5.89319	6.53771	6.40231	6.48641	5.93144	6.32991	1.06718	0.0938027	0.0524797	0.0468325
sp|P21399|ACOC_HUMAN	ACO1	ACOC_HUMAN Cytoplasmic aconitate hydratase	39	5.74723	5.8042	6.09927	6.27105	6.11619	6.20112	6.61669	6.59449	5.98044	6.38212	1.06717	0.0937853	0.0414135	0.0408195
sp|Q96T76-8|MMS19_HUMAN	MMS19	MMS19_HUMAN Isoform 5 of MMS19 nucleotide excision repair protein homolog	27	6.03121	5.9012	6.48793	6.66603	6.33794	6.67624	6.94483	6.81204	6.27159	6.69276	1.06716	0.09377	0.0580299	0.0389567
sp|Q9P0K7-2|RAI14_HUMAN	RAI14	RAI14_HUMAN Isoform 2 of Ankycorbin	21	5.84162	5.78373	6.31619	6.21471	6.20317	6.4797	6.70303	6.39246	6.03906	6.44459	1.06715	0.093764	0.0440011	0.0321796
sp|P20936|RASA1_HUMAN	RASA1	RASA1_HUMAN Ras GTPase-activating protein 1	7	6.15854	5.83259	6.26868	6.32189	6.21733	6.25457	6.97881	6.78143	6.14543	6.55804	1.06714	0.0937508	0.0356965	0.058073
sp|O43542|XRCC3_HUMAN	XRCC3	XRCC3_HUMAN DNA repair protein XRCC3	4	6.01253	5.44919	6.35997	6.37304	5.9692	6.62183	6.62391	6.60345	6.04868	6.4546	1.06711	0.0937062	0.0716074	0.0501548
sp|P34949|MPI_HUMAN	MPI	MPI_HUMAN Mannose-6-phosphate isomerase	14	5.75459	5.80804	6.00403	6.63713	6.40291	6.18222	6.50653	6.73383	6.05095	6.45637	1.067	0.0935627	0.0669703	0.0354906
sp|O75064|DEN4B_HUMAN	DENND4B	DEN4B_HUMAN DENN domain-containing protein 4B	2	5.61387	5.69128	6.45727	6.21183	6.32593	6.18848	7.37758	5.68858	5.99356	6.39514	1.067	0.0935627	0.0679922	0.111008
sp|Q6P3X3|TTC27_HUMAN	TTC27	TTC27_HUMAN Tetratricopeptide repeat protein 27	12	6.3099	5.76418	6.3848	6.3682	6.40162	6.40737	7.07454	6.60695	6.20677	6.62262	1.067	0.0935594	0.0478192	0.0477218
sp|O43242|PSMD3_HUMAN	PSMD3	PSMD3_HUMAN 26S proteasome non-ATPase regulatory subunit 3	44	5.86703	5.73469	6.15498	6.32729	6.23493	6.03975	6.75119	6.67146	6.021	6.42433	1.06699	0.093544	0.0447142	0.0532952
sp|Q52LJ0-2|FA98B_HUMAN	FAM98B	FA98B_HUMAN Isoform 2 of Protein FAM98B	8	6.26993	6.17089	6.34409	6.41846	6.72965	6.39182	6.9584	6.81151	6.30084	6.72284	1.06698	0.0935271	0.016783	0.0357169
sp|O95758-4|PTBP3_HUMAN	PTBP3	PTBP3_HUMAN Isoform 4 of Polypyrimidine tract-binding protein 3	15	5.90073	6.12597	5.97715	5.98723	6.40873	6.34544	6.4403	6.40321	5.99777	6.39942	1.06697	0.093515	0.0156371	0.00617593
sp|Q9Y2G8|DJC16_HUMAN	DNAJC16	DJC16_HUMAN DnaJ homolog subfamily C member 16	5	5.74339	5.50794	6.55262	6.42368	6.35099	6.10157	6.57661	6.82061	6.05691	6.46245	1.06695	0.0934987	0.0841804	0.0476078
sp|O94829|IPO13_HUMAN	IPO13	IPO13_HUMAN Importin-13	1	5.13703	4.99054	6.86166	7.01672	6.12512	6.57173	7.01321	5.90137	6.00149	6.40286	1.06688	0.0933958	0.180999	0.0770248
sp|Q96E29|MTER1_HUMAN	MTERFD1	MTER1_HUMAN mTERF domain-containing protein 1, mitochondrial	9	5.96584	5.67178	6.42605	6.28671	6.39147	6.29643	6.62344	6.66637	6.0876	6.49443	1.06683	0.09333	0.0554573	0.0275461
sp|Q9NWS8|RMND1_HUMAN	RMND1	RMND1_HUMAN Required for meiotic nuclear division protein 1 homolog	7	5.37628	5.36631	5.77303	6.83493	5.81267	6.2256	6.24797	6.62446	5.83764	6.22767	1.06681	0.093309	0.118424	0.053263
sp|P62136|PP1A_HUMAN	PPP1CA	PP1A_HUMAN Serine/threonine-protein phosphatase PP1-alpha catalytic subunit	8	6.06058	6.39737	5.79879	6.09812	6.42736	6.64527	6.29988	6.60766	6.08872	6.49504	1.06673	0.0932012	0.0402528	0.0248132
sp|Q13332|PTPRS_HUMAN	PTPRS	PTPRS_HUMAN Receptor-type tyrosine-protein phosphatase S	8	5.90666	6.14253	6.42146	6.7123	6.33023	6.60446	6.97384	6.95491	6.29574	6.71586	1.06673	0.0931968	0.0553418	0.0458799
sp|P12694|ODBA_HUMAN	BCKDHA	ODBA_HUMAN 2-oxoisovalerate dehydrogenase subunit alpha, mitochondrial	11	5.81649	5.98542	5.69716	6.49493	5.98684	6.24543	6.34969	7.01247	5.9985	6.39861	1.0667	0.0931562	0.0585893	0.0682561
sp|Q6N075-2|MFSD5_HUMAN	MFSD5	MFSD5_HUMAN Isoform 2 of Molybdate-anion transporter	4	5.32157	5.35858	6.72016	7.04352	6.0165	6.00086	6.72207	7.33409	6.11096	6.51838	1.06667	0.093115	0.147277	0.0980953
sp|P85298|RHG08_HUMAN	ARHGAP8	RHG08_HUMAN Rho GTPase-activating protein 8	4	6.01973	6.01844	6.83732	6.158	7.0771	6.50047	6.54678	6.57749	6.25837	6.67546	1.06664	0.0930797	0.0625532	0.0403905
sp|Q13838-2|DX39B_HUMAN	DDX39B	DX39B_HUMAN Isoform 2 of Spliceosome RNA helicase DDX39B	41	5.63024	5.76532	6.33969	6.25648	6.15156	6.07402	6.64165	6.72142	5.99793	6.39716	1.06656	0.0929668	0.0587846	0.0518184
sp|P23919|KTHY_HUMAN	DTYMK	KTHY_HUMAN Thymidylate kinase	20	5.86035	5.79813	6.26845	6.43279	6.09386	6.22091	6.77906	6.88723	6.08993	6.49526	1.06656	0.0929627	0.0508133	0.0609756
sp|O60341|KDM1A_HUMAN	KDM1A	KDM1A_HUMAN Lysine-specific histone demethylase 1A	31	5.91295	6.02261	6.22197	6.33324	6.39613	6.29978	6.73499	6.68957	6.12269	6.53012	1.06654	0.0929427	0.031017	0.0328924
sp|Q8NG08|HELB_HUMAN	HELB	HELB_HUMAN DNA helicase B	3	5.74254	5.68501	6.42674	6.95187	6.54339	6.03192	7.11729	6.76416	6.20154	6.61419	1.06654	0.092938	0.0972503	0.0687126
sp|Q9P260-2|K1468_HUMAN	KIAA1468	K1468_HUMAN Isoform 2 of LisH domain and HEAT repeat-containing protein KIAA1468	12	5.67764	5.9473	6.59549	6.68688	6.39709	6.60495	6.67686	6.88555	6.22683	6.64111	1.06653	0.0929276	0.0790734	0.0303507
sp|Q9H1Y0|ATG5_HUMAN	ATG5	ATG5_HUMAN Autophagy protein 5	10	5.65066	5.78065	6.16324	6.19709	5.96847	6.39295	6.5508	6.46202	5.94791	6.34356	1.06652	0.0929099	0.0460219	0.040714
sp|P19474|RO52_HUMAN	TRIM21	RO52_HUMAN E3 ubiquitin-protein ligase TRIM21	10	5.7247	5.80118	6.31721	6.47786	6.24982	6.31275	6.72731	6.64823	6.08024	6.48453	1.06649	0.0928738	0.0614309	0.0367465
sp|P13674|P4HA1_HUMAN	P4HA1	P4HA1_HUMAN Prolyl 4-hydroxylase subunit alpha-1	15	5.56618	5.76755	5.91897	6.64589	5.93676	5.98934	6.65847	6.90297	5.97465	6.37188	1.06649	0.0928666	0.0787074	0.0758012
sp|P19367-3|HXK1_HUMAN	HK1	HXK1_HUMAN Isoform 3 of Hexokinase-1	40	6.03345	5.98381	6.38365	6.48141	6.42978	6.3097	6.98139	6.81446	6.22058	6.63383	1.06643	0.0927935	0.039996	0.0476786
sp|O95202|LETM1_HUMAN	LETM1	LETM1_HUMAN LETM1 and EF-hand domain-containing protein 1, mitochondrial	41	5.82545	5.73802	6.18319	6.4312	6.17502	6.13933	6.70433	6.76495	6.04446	6.44591	1.06641	0.0927688	0.0532404	0.0519142
sp|Q5W111|SPRY7_HUMAN	SPRYD7	SPRY7_HUMAN SPRY domain-containing protein 7	4	5.39371	5.52413	6.02854	6.76128	6.46643	5.7692	6.35859	6.68696	5.92691	6.32029	1.06637	0.0927105	0.1046	0.062021
sp|Q5VVQ6|OTU1_HUMAN	YOD1	OTU1_HUMAN Ubiquitin thioesterase OTU1	2	5.97553	6.64546	6.25058	5.97429	6.25561	7.32586	6.70036	6.21274	6.21146	6.62364	1.06636	0.0926912	0.0510627	0.0781227
sp|Q9Y3A3|PHOCN_HUMAN	MOB4	PHOCN_HUMAN MOB-like protein phocein	5	6.14376	6.13372	6.18822	6.5596	6.32702	6.91197	6.71775	6.72869	6.25633	6.67136	1.06634	0.0926649	0.0325376	0.03691
sp|Q7Z333-4|SETX_HUMAN	SETX	SETX_HUMAN Isoform 4 of Probable helicase senataxin	15	5.94365	6.07963	6.35999	6.23576	7.07456	6.81993	6.0155	6.34201	6.15476	6.563	1.06633	0.0926534	0.0294992	0.0723447
sp|Q13619|CUL4A_HUMAN	CUL4A	CUL4A_HUMAN Cullin-4A	22	5.88126	5.70092	6.49072	6.37572	6.40648	6.2809	6.75544	6.62729	6.11216	6.51753	1.06632	0.0926436	0.0623149	0.0327851
sp|Q9UDR5|AASS_HUMAN	AASS	AASS_HUMAN Alpha-aminoadipic semialdehyde synthase, mitochondrial	3	4.69728	6.09688	6.81833	6.31089	6.49167	5.9483	6.62007	6.44984	5.98085	6.37747	1.06632	0.0926349	0.151754	0.0462783
sp|O95801|TTC4_HUMAN	TTC4	TTC4_HUMAN Tetratricopeptide repeat protein 4	10	5.7439	6.03193	6.19954	6.52288	6.46823	6.23572	6.68448	6.73431	6.12456	6.53069	1.06631	0.0926275	0.0531393	0.0349198
sp|P10620|MGST1_HUMAN	MGST1	MGST1_HUMAN Microsomal glutathione S-transferase 1	2	5.77613	5.75225	6.31996	6.16659	6.49591	6.29085	6.19806	6.62252	6.00373	6.40184	1.06631	0.0926258	0.0472649	0.0300999
sp|Q5FWF5|ESCO1_HUMAN	ESCO1	ESCO1_HUMAN N-acetyltransferase ESCO1	1	5.612	6.0666	6.84498	5.7265	6.03035	6.27512	7.38902	6.16225	6.06252	6.46419	1.06625	0.0925509	0.0917471	0.0966275
sp|A1L0T0|ILVBL_HUMAN	ILVBL	ILVBL_HUMAN Acetolactate synthase-like protein	13	6.15883	6.05234	6.29418	6.51859	6.72772	6.42654	6.8423	6.68236	6.25598	6.66973	1.06614	0.0923913	0.0321461	0.0263191
sp|Q9UNH6-3|SNX7_HUMAN	SNX7	SNX7_HUMAN Isoform 3 of Sorting nexin-7	6	5.92997	5.91719	6.30434	6.55801	6.41916	6.31015	7.01411	6.59979	6.17738	6.5858	1.06612	0.0923648	0.0503229	0.0469972
sp|Q15796|SMAD2_HUMAN	SMAD2	SMAD2_HUMAN Mothers against decapentaplegic homolog 2	6	6.1489	6.20969	6.29134	6.47029	6.28377	6.63706	6.78891	7.07035	6.28005	6.69502	1.06608	0.0923117	0.0222301	0.0489477
sp|Q02252|MMSA_HUMAN	ALDH6A1	MMSA_HUMAN Methylmalonate-semialdehyde dehydrogenase [acylating], mitochondrial	22	5.73728	5.82002	6.16737	6.03401	6.05633	6.09903	6.66605	6.50695	5.93967	6.33209	1.06607	0.092299	0.0331095	0.0475936
sp|O14980|XPO1_HUMAN	XPO1	XPO1_HUMAN Exportin-1	65	6.04838	5.96123	6.48419	6.44597	6.40181	6.46669	6.91372	6.80503	6.23494	6.64681	1.06606	0.0922864	0.0430741	0.0377365
sp|Q8WU17|RN139_HUMAN	RNF139	RN139_HUMAN E3 ubiquitin-protein ligase RNF139	3	5.76569	5.77696	6.58583	5.95755	6.54578	6.52106	5.98607	6.62294	6.02151	6.41896	1.06601	0.0922154	0.0641615	0.0454651
sp|P48444|COPD_HUMAN	ARCN1	COPD_HUMAN Coatomer subunit delta	41	5.9645	5.88671	6.09687	6.31597	6.28232	6.23085	6.7572	6.59493	6.06601	6.46632	1.06599	0.0921975	0.0309709	0.0389652
sp|P28676|GRAN_HUMAN	GCA	GRAN_HUMAN Grancalcin	8	6.07553	6.01066	6.09183	6.17026	6.23505	6.65134	6.552	6.51502	6.08707	6.48835	1.06592	0.0921042	0.010779	0.0274968
sp|O94901-9|SUN1_HUMAN	SUN1	SUN1_HUMAN Isoform 9 of SUN domain-containing protein 1	1	5.61824	5.86498	6.31061	7.03507	6.22023	6.41515	6.87213	6.95558	6.20723	6.61577	1.06582	0.0919612	0.10018	0.0536466
sp|O60293|ZC3H1_HUMAN	ZFC3H1	ZC3H1_HUMAN Zinc finger C3H1 domain-containing protein	3	5.18209	5.89555	7.02328	6.32813	6.50459	6.26388	6.52848	6.7395	6.10726	6.50911	1.0658	0.091935	0.126431	0.0298973
sp|O60518|RNBP6_HUMAN	RANBP6	RNBP6_HUMAN Ran-binding protein 6	4	5.72601	6.43409	6.03617	6.46898	6.34066	6.29192	6.5384	7.11578	6.16631	6.57169	1.06574	0.0918564	0.0572686	0.0575286
sp|Q8TEW0-8|PARD3_HUMAN	PARD3	PARD3_HUMAN Isoform 8 of Partitioning defective 3 homolog	2	5.45667	5.656	6.01382	6.01808	6.39445	6.06156	5.95568	6.25286	5.78614	6.16614	1.06567	0.0917652	0.0479701	0.0317352
sp|Q9GZR7|DDX24_HUMAN	DDX24	DDX24_HUMAN ATP-dependent RNA helicase DDX24	17	6.35808	5.92233	6.22445	6.07218	6.75398	6.53352	6.51747	6.38611	6.14426	6.54777	1.06567	0.0917644	0.0306792	0.0232919
sp|Q8NB90|SPAT5_HUMAN	SPATA5	SPAT5_HUMAN Spermatogenesis-associated protein 5	15	6.04493	6.28087	6.34704	6.34483	6.554	6.34853	6.91655	6.84097	6.25442	6.66501	1.06565	0.0917321	0.0228622	0.0393846
sp|P23443|KS6B1_HUMAN	RPS6KB1	KS6B1_HUMAN Ribosomal protein S6 kinase beta-1	6	6.01662	6.14117	6.29198	6.61203	6.79113	6.20471	6.89545	6.81495	6.26545	6.67656	1.06562	0.0916868	0.0410224	0.047587
sp|Q13153|PAK1_HUMAN	PAK1	PAK1_HUMAN Serine/threonine-protein kinase PAK 1	23	5.68115	6.15133	5.92036	6.29332	6.12256	6.32035	6.45843	6.72209	6.01154	6.40586	1.06559	0.0916571	0.0446781	0.0393208
sp|Q9UKY1|ZHX1_HUMAN	ZHX1	ZHX1_HUMAN Zinc fingers and homeoboxes protein 1	2	5.78734	6.19989	6.20365	6.98012	6.20455	5.96274	6.85099	7.80342	6.29275	6.70542	1.06558	0.0916381	0.0791635	0.122653
tr|E7ESP4|E7ESP4_HUMAN	ITGA2	E7ESP4_HUMAN Integrin alpha-2	3	6.04896	6.95371	5.58313	5.47288	6.32452	6.95944	6.31847	6.0333	6.01467	6.40893	1.06555	0.0915985	0.112056	0.0610634
sp|Q8NBN7|RDH13_HUMAN	RDH13	RDH13_HUMAN Retinol dehydrogenase 13	11	6.07928	5.9474	6.86488	6.8188	6.51109	6.6907	7.09782	7.09517	6.42759	6.84869	1.06552	0.0915512	0.0749461	0.0431298
sp|Q13617-2|CUL2_HUMAN	CUL2	CUL2_HUMAN Isoform 2 of Cullin-2	37	5.88765	5.59967	6.31198	6.3333	6.06812	6.26768	6.7211	6.65632	6.03315	6.4283	1.0655	0.0915269	0.0587509	0.0486367
sp|Q6PJG6|BRAT1_HUMAN	BRAT1	BRAT1_HUMAN BRCA1-associated ATM activator 1	16	6.35335	6.21249	6.70522	6.95082	6.58239	6.81387	7.33709	7.2043	6.55547	6.98441	1.06543	0.0914395	0.0511433	0.0498339
sp|O43399-3|TPD54_HUMAN	TPD52L2	TPD54_HUMAN Isoform 3 of Tumor protein D54	1	4.89671	4.79231	7.35996	5.81399	6.56142	5.71884	6.3067	5.76973	5.71574	6.08917	1.06533	0.0913053	0.207911	0.0676806
sp|Q96FF7|YS003_HUMAN		YS003_HUMAN Uncharacterized protein LOC113230	1	8.26131	7.52831	15.7474	2.42138	2.97929	2.20578	25.2963	5.69426	8.4896	9.04391	1.06529	0.0912497	0.64687	1.2094
sp|Q8N3U4-2|STAG2_HUMAN	STAG2	STAG2_HUMAN Isoform 2 of Cohesin subunit SA-2	28	5.99998	5.88706	6.44302	6.41887	6.455	6.47234	6.8594	6.57785	6.18723	6.59115	1.06528	0.0912354	0.0461169	0.0283552
sp|P51956|NEK3_HUMAN	NEK3	NEK3_HUMAN Serine/threonine-protein kinase Nek3	3	5.79734	5.31718	6.22402	6.44927	6.20383	6.0578	6.62552	6.45298	5.94695	6.33503	1.06526	0.0912015	0.0839694	0.0399719
sp|Q8WWC4|CB047_HUMAN	C2orf47	CB047_HUMAN Uncharacterized protein C2orf47, mitochondrial	7	6.08739	6.00932	6.34153	6.17878	6.53344	6.15723	6.74598	6.78622	6.15426	6.55572	1.06523	0.0911695	0.0231987	0.0439124
sp|Q8IWZ3-2|ANKH1_HUMAN	ANKHD1	ANKH1_HUMAN Isoform 2 of Ankyrin repeat and KH domain-containing protein 1	2	5.505	5.47946	6.84448	6.1373	6.00425	6.62184	6.7629	6.13991	5.99156	6.38223	1.0652	0.0911278	0.107635	0.0574923
sp|Q9UBF8|PI4KB_HUMAN	PI4KB	PI4KB_HUMAN Phosphatidylinositol 4-kinase beta	6	6.04878	5.69714	6.3695	6.38407	6.19123	5.99296	6.96567	6.94703	6.12487	6.52422	1.0652	0.0911262	0.0529698	0.0774893
sp|Q0VGL1|LTOR4_HUMAN	LAMTOR4	LTOR4_HUMAN Ragulator complex protein LAMTOR4	3	6.23305	6.21313	6.16261	5.84066	6.64465	6.54223	6.36615	6.48845	6.11236	6.51037	1.06512	0.0910094	0.0300285	0.0178085
sp|Q16222|UAP1_HUMAN	UAP1	UAP1_HUMAN UDP-N-acetylhexosamine pyrophosphorylase	22	5.69734	5.58106	6.1752	6.27956	6.09781	6.13299	6.48978	6.55775	5.93329	6.31958	1.06511	0.090997	0.0582349	0.037634
sp|P82664|RT10_HUMAN	MRPS10	RT10_HUMAN 28S ribosomal protein S10, mitochondrial	11	5.88745	6.23803	6.0669	6.13456	6.17468	6.24238	6.50634	6.98528	6.08174	6.47717	1.06502	0.0908807	0.0242374	0.0567717
sp|P50990|TCPQ_HUMAN	CCT8	TCPQ_HUMAN T-complex protein 1 subunit theta	148	5.95952	5.99324	6.0419	6.17909	6.24195	6.31698	6.51828	6.66526	6.04344	6.43562	1.06489	0.0907092	0.0159761	0.0299092
sp|P28288|ABCD3_HUMAN	ABCD3	ABCD3_HUMAN ATP-binding cassette sub-family D member 3	18	6.10073	6.03391	6.71629	6.64182	6.71458	6.67483	6.93001	6.82672	6.37319	6.78654	1.06486	0.0906601	0.0557868	0.0169838
sp|Q16186|ADRM1_HUMAN	ADRM1	ADRM1_HUMAN Proteasomal ubiquitin receptor ADRM1	16	5.90533	5.73644	5.68104	5.81704	6.05731	6.25272	6.14173	6.18853	5.78496	6.16007	1.06484	0.0906397	0.0168992	0.0133504
sp|P07437|TBB5_HUMAN	TUBB	TBB5_HUMAN Tubulin beta chain	27	5.64377	5.52883	6.32981	6.51185	6.28505	6.01623	6.6578	6.6121	6.00356	6.39279	1.06483	0.0906274	0.0815794	0.0470782
sp|Q9Y2A7-2|NCKP1_HUMAN	NCKAP1	NCKP1_HUMAN Isoform 2 of Nck-associated protein 1	46	5.78477	5.96153	6.18868	6.28893	6.00752	6.32577	6.77431	6.68536	6.05598	6.44824	1.06477	0.0905456	0.037455	0.0545936
sp|Q9NNW5|WDR6_HUMAN	WDR6	WDR6_HUMAN WD repeat-containing protein 6	15	5.64286	5.50289	6.35875	6.60498	5.80937	6.04771	6.83897	6.97505	6.02737	6.41777	1.06477	0.0905446	0.0891588	0.0897389
sp|Q86VP6|CAND1_HUMAN	CAND1	CAND1_HUMAN Cullin-associated NEDD8-dissociated protein 1	56	6.04117	5.79931	6.21725	6.43756	6.12708	6.23781	6.96207	6.75214	6.12382	6.51978	1.06466	0.0903897	0.0441505	0.0615644
sp|Q86UV5|UBP48_HUMAN	USP48	UBP48_HUMAN Ubiquitin carboxyl-terminal hydrolase 48	22	5.86932	5.8178	6.46807	6.3729	6.1425	6.33514	6.82513	6.81069	6.13202	6.52837	1.06463	0.0903587	0.0547952	0.0526186
sp|Q9UL54-2|TAOK2_HUMAN	TAOK2	TAOK2_HUMAN Isoform 2 of Serine/threonine-protein kinase TAO2	11	5.83098	5.8013	6.40545	6.27869	6.91442	6.66541	6.13187	6.17526	6.07911	6.47174	1.06459	0.0902947	0.0507085	0.0589661
sp|Q0VG06|FP100_HUMAN	FAAP100	FP100_HUMAN Fanconi anemia-associated protein of 100 kDa	8	5.43495	6.056	6.4658	6.35865	6.02751	6.2631	6.90464	6.69	6.07885	6.47131	1.06456	0.0902599	0.0761681	0.0615474
sp|O95487|SC24B_HUMAN	SEC24B	SC24B_HUMAN Protein transport protein Sec24B	20	5.86601	5.63211	6.39701	6.51581	6.27684	6.27428	6.81542	6.62029	6.10274	6.49671	1.06456	0.0902528	0.0691819	0.0411744
tr|G3V4T6|G3V4T6_HUMAN	GSTZ1	G3V4T6_HUMAN Maleylacetoacetate isomerase	9	5.51901	5.71791	5.97108	6.62603	6.03899	6.10223	6.63994	6.5909	5.95851	6.34302	1.06453	0.0902177	0.0808822	0.0498562
sp|P30419|NMT1_HUMAN	NMT1	NMT1_HUMAN Glycylpeptide N-tetradecanoyltransferase 1	12	5.79058	5.8967	6.27973	6.46588	6.25636	6.16582	7.03866	6.54599	6.10822	6.50171	1.06442	0.090066	0.0520267	0.0604423
sp|P53990-5|IST1_HUMAN	IST1	IST1_HUMAN Isoform 5 of IST1 homolog	18	6.1446	6.18928	6.07556	6.10194	6.47073	6.38876	6.56401	6.66645	6.12784	6.52249	1.0644	0.0900425	0.00813757	0.0183576
sp|Q15013-3|MD2BP_HUMAN	MAD2L1BP	MD2BP_HUMAN Isoform 2 of MAD2L1-binding protein	2	5.49501	6.18967	6.68744	6.63236	6.43393	6.0871	7.18032	6.91272	6.25112	6.65352	1.06437	0.0900026	0.0881633	0.0733099
sp|Q53R41|FAKD1_HUMAN	FASTKD1	FAKD1_HUMAN FAST kinase domain-containing protein 1	7	5.65376	6.147	6.86773	6.9497	6.5602	6.48008	7.02517	7.20111	6.40455	6.81664	1.06434	0.0899641	0.0963241	0.0515427
tr|Q5VZU9|Q5VZU9_HUMAN	TPP2	Q5VZU9_HUMAN Tripeptidyl-peptidase 2	2	5.58016	5.22963	6.49906	6.65276	6.31045	5.88159	6.50113	6.8083	5.9904	6.37537	1.06426	0.0898556	0.115837	0.0608353
sp|Q9UBP0|SPAST_HUMAN	SPAST	SPAST_HUMAN Spastin	11	5.58994	5.66435	6.00282	6.59271	6.01958	6.15924	6.67897	6.52185	5.96246	6.34491	1.06414	0.0896932	0.0766425	0.0484254
sp|P55060|XPO2_HUMAN	CSE1L	XPO2_HUMAN Exportin-2	69	6.26055	6.14693	6.57761	6.55315	6.57954	6.47776	7.10875	7.00932	6.38456	6.79384	1.06411	0.0896406	0.0335366	0.0458767
sp|Q8N729|NPW_HUMAN	NPW	NPW_HUMAN Neuropeptide W	1	5.73814	6.84596	6.44109	5.45078	6.41276	6.81058	6.66266	6.15815	6.11899	6.51104	1.06407	0.0895933	0.104379	0.0440608
sp|Q9NUJ3|T11L1_HUMAN	TCP11L1	T11L1_HUMAN T-complex protein 11-like protein 1	2	5.73934	4.90624	7.13624	7.05022	5.43303	6.79991	7.13748	7.04957	6.20801	6.605	1.06395	0.0894271	0.17362	0.120256
sp|Q460N5|PAR14_HUMAN	PARP14	PAR14_HUMAN Poly [ADP-ribose] polymerase 14	13	5.74236	5.56844	6.78368	6.63348	6.47064	6.53964	6.64265	6.65306	6.18199	6.5765	1.06382	0.0892481	0.0995227	0.0132566
sp|O43314|VIP2_HUMAN	PPIP5K2	VIP2_HUMAN Inositol hexakisphosphate and diphosphoinositol-pentakisphosphate kinase 2	14	6.05236	5.82679	6.31175	6.2571	6.55927	6.27865	6.71009	6.45987	6.112	6.50197	1.0638	0.0892324	0.036076	0.0278318
sp|P0C7P0|CISD3_HUMAN	CISD3	CISD3_HUMAN CDGSH iron-sulfur domain-containing protein 3, mitochondrial	2	6.46929	6.15907	5.82171	5.5085	5.61842	7.18524	6.58706	6.09472	5.98964	6.37136	1.06373	0.0891315	0.0694063	0.105379
sp|P49589-3|SYCC_HUMAN	CARS	SYCC_HUMAN Isoform 3 of Cysteine--tRNA ligase, cytoplasmic	57	5.66777	5.65814	6.1086	6.48548	6.00444	6.00277	6.6573	6.77945	5.98	6.36099	1.06371	0.0891064	0.0664092	0.0653476
sp|Q8TAA5|GRPE2_HUMAN	GRPEL2	GRPE2_HUMAN GrpE protein homolog 2, mitochondrial	7	5.8432	5.79915	6.36261	6.29314	6.13323	6.22662	6.77138	6.71408	6.07453	6.46133	1.06368	0.089059	0.0484753	0.0507636
sp|Q13418|ILK_HUMAN	ILK	ILK_HUMAN Integrin-linked protein kinase	22	6.18004	6.04905	6.47796	6.43358	6.54525	6.53542	6.79746	6.8629	6.28516	6.68526	1.06366	0.0890342	0.0326066	0.0253556
sp|A6NGR9|MROH6_HUMAN	MROH6	MROH6_HUMAN Maestro heat-like repeat-containing protein family member 6	1	5.87547	5.80578	6.54116	7.13728	6.00366	6.69825	6.83074	7.44117	6.33992	6.74345	1.06365	0.0890227	0.0988096	0.0874698
sp|P43897-2|EFTS_HUMAN	TSFM	EFTS_HUMAN Isoform 2 of Elongation factor Ts, mitochondrial	15	5.85179	5.77068	6.52311	6.32065	6.09406	6.58467	6.90117	6.44318	6.11656	6.50577	1.06363	0.0889999	0.0594495	0.0514403
sp|Q96G75|RMD5B_HUMAN	RMND5B	RMD5B_HUMAN Protein RMD5 homolog B	2	6.02083	6.20324	6.12167	6.99919	6.67066	7.10863	6.30111	6.87685	6.33623	6.73931	1.06362	0.0889762	0.0707399	0.0508304
sp|Q9H223|EHD4_HUMAN	EHD4	EHD4_HUMAN EH domain-containing protein 4	29	5.81981	5.6993	6.47177	6.49041	6.27973	6.33324	6.89406	6.53115	6.12032	6.50955	1.0636	0.088949	0.0685491	0.0427401
sp|P78381|S35A2_HUMAN	SLC35A2	S35A2_HUMAN UDP-galactose translocator	2	5.46182	6.20973	6.39797	6.21426	6.01722	6.62632	6.50428	6.68004	6.07095	6.45697	1.06358	0.0889351	0.0684314	0.0468093
sp|Q5T8A7|PPR26_HUMAN	PPP1R26	PPR26_HUMAN Protein phosphatase 1 regulatory subunit 26	2	6.54316	6.7882	5.81429	5.87959	7.01741	7.14662	6.57863	5.86801	6.25631	6.65267	1.06335	0.0886209	0.0773466	0.0867064
sp|Q13625-3|ASPP2_HUMAN	TP53BP2	ASPP2_HUMAN Isoform 3 of Apoptosis-stimulating of p53 protein 2	9	5.68227	6.1388	6.08709	6.50666	6.08711	6.87819	6.50341	6.49246	6.1037	6.49029	1.06334	0.0885983	0.0552756	0.0497834
sp|Q96PY5-3|FMNL2_HUMAN	FMNL2	FMNL2_HUMAN Isoform 2 of Formin-like protein 2	1	7.52604	4.33466	7.39375	5.75906	6.91408	6.90053	6.64772	6.135	6.25338	6.64933	1.06332	0.0885739	0.241569	0.0547591
sp|P55010|IF5_HUMAN	EIF5	IF5_HUMAN Eukaryotic translation initiation factor 5	26	5.79654	5.90806	5.9558	6.46199	6.15715	6.23276	6.47934	6.77871	6.0306	6.41199	1.06324	0.0884712	0.0489563	0.0437504
sp|P62195|PRS8_HUMAN	PSMC5	PRS8_HUMAN 26S protease regulatory subunit 8	45	5.93461	5.81445	6.2617	6.37387	6.31924	6.18402	6.6519	6.77155	6.09616	6.48168	1.06324	0.0884671	0.0433988	0.0425312
sp|Q96MX6|WDR92_HUMAN	WDR92	WDR92_HUMAN WD repeat-containing protein 92	7	6.11786	5.54206	6.0655	6.39276	6.12783	6.17383	6.7244	6.61675	6.02954	6.4107	1.06321	0.0884333	0.0589222	0.0473984
sp|O95149|SPN1_HUMAN	SNUPN	SPN1_HUMAN Snurportin-1	3	5.49364	5.73027	5.89166	6.6266	5.78467	6.07114	6.4681	6.91721	5.93554	6.31028	1.06313	0.0883241	0.0823585	0.0779966
sp|Q8WW59|SPRY4_HUMAN	SPRYD4	SPRY4_HUMAN SPRY domain-containing protein 4	11	5.68217	5.84151	6.35724	6.29026	6.21075	6.08226	6.82086	6.58222	6.04279	6.42402	1.06309	0.0882609	0.0549422	0.052773
sp|Q53S58|TM177_HUMAN	TMEM177	TM177_HUMAN Transmembrane protein 177	4	6.31489	5.32971	6.57283	6.69035	6.69745	6.00923	6.78986	6.9785	6.22694	6.61876	1.06292	0.0880364	0.0993056	0.0638866
sp|O15294|OGT1_HUMAN	OGT	OGT1_HUMAN UDP-N-acetylglucosamine--peptide N-acetylglucosaminyltransferase 110 kDa subunit	32	5.85299	5.73032	6.42071	6.69545	6.38414	6.26475	6.80266	6.80161	6.17487	6.56329	1.0629	0.088011	0.0743706	0.042672
sp|Q93034|CUL5_HUMAN	CUL5	CUL5_HUMAN Cullin-5	26	5.71634	5.91479	6.43549	6.41134	6.37664	6.12825	6.77451	6.73801	6.11949	6.50435	1.06289	0.087994	0.0588787	0.0474155
sp|P49642|PRI1_HUMAN	PRIM1	PRI1_HUMAN DNA primase small subunit	14	6.00964	5.5817	6.24546	6.37316	6.25203	6.21694	6.74366	6.51979	6.05249	6.43311	1.06289	0.0879864	0.0575155	0.038442
sp|Q9UIV1|CNOT7_HUMAN	CNOT7	CNOT7_HUMAN CCR4-NOT transcription complex subunit 7	3	5.58335	5.86575	6.23298	6.54352	6.152	6.49302	6.65622	6.44776	6.0564	6.43725	1.06288	0.087984	0.0693082	0.0326517
sp|Q9UPT9|UBP22_HUMAN	USP22	UBP22_HUMAN Ubiquitin carboxyl-terminal hydrolase 22	8	6.1301	5.97321	6.62588	6.83088	6.85555	6.25702	6.93275	7.1213	6.39002	6.79166	1.06285	0.0879433	0.0633287	0.0549929
sp|Q9Y2I1|NISCH_HUMAN	NISCH	NISCH_HUMAN Nischarin	7	5.84095	5.97271	5.99877	6.36089	5.94634	6.46444	6.67181	6.60984	6.04333	6.42311	1.06284	0.0879277	0.0368492	0.0513013
sp|Q9NQ50|RM40_HUMAN	MRPL40	RM40_HUMAN 39S ribosomal protein L40, mitochondrial	9	5.62857	6.07358	6.18957	6.40403	6.21121	5.96513	6.74079	6.90412	6.07394	6.45531	1.06279	0.0878549	0.053828	0.0682776
sp|P50851|LRBA_HUMAN	LRBA	LRBA_HUMAN Lipopolysaccharide-responsive and beige-like anchor protein	71	5.87257	5.95722	6.3634	6.46573	6.41703	6.18774	6.79857	6.80362	6.16473	6.55174	1.06278	0.0878404	0.0476152	0.0462123
sp|O60763-2|USO1_HUMAN	USO1	USO1_HUMAN Isoform 2 of General vesicular transport factor p115	49	6.03478	5.85989	6.44706	6.33119	6.28914	6.25353	6.90457	6.77422	6.16823	6.55537	1.06276	0.0878196	0.0436208	0.0507335
sp|Q96P70|IPO9_HUMAN	IPO9	IPO9_HUMAN Importin-9	51	6.13715	6.26705	6.13069	6.07943	6.43595	6.66194	6.51381	6.54699	6.15358	6.53967	1.06274	0.0877924	0.0129896	0.0143527
sp|Q9BQ67|GRWD1_HUMAN	GRWD1	GRWD1_HUMAN Glutamate-rich WD repeat-containing protein 1	17	5.76436	5.66049	6.12046	6.44509	6.0937	6.2509	6.59013	6.55828	5.9976	6.37325	1.06263	0.0876445	0.0596046	0.0378303
sp|Q9UM11|FZR_HUMAN	FZR1	FZR_HUMAN Fizzy-related protein homolog	2	5.95712	5.60968	5.80296	6.76352	6.59544	6.4442	6.16227	6.44216	6.03332	6.41102	1.0626	0.0876012	0.0840545	0.0281859
sp|Q8TC07|TBC15_HUMAN	TBC1D15	TBC15_HUMAN TBC1 domain family member 15	22	5.92306	6.03331	6.67403	6.66458	6.45257	6.54869	6.91596	6.95834	6.32375	6.71889	1.06249	0.0874437	0.0635015	0.0380491
sp|O43823|AKAP8_HUMAN	AKAP8	AKAP8_HUMAN A-kinase anchor protein 8	8	6.14515	5.93255	6.01851	6.61488	6.34865	6.77754	6.82512	6.30298	6.17777	6.56357	1.06245	0.0873945	0.0492422	0.0420283
sp|Q7LFX5|CHSTF_HUMAN	CHST15	CHSTF_HUMAN Carbohydrate sulfotransferase 15	1	5.836	6.1017	6.15441	6.51559	6.12794	6.78089	6.75704	6.47711	6.15192	6.53574	1.06239	0.0873138	0.0454551	0.0466443
sp|Q9BTE7|DCNL5_HUMAN	DCUN1D5	DCNL5_HUMAN DCN1-like protein 5	12	6.00177	6.07679	6.54393	6.56894	6.57088	6.34236	6.86266	6.98675	6.29786	6.69066	1.06237	0.087288	0.047686	0.0433966
sp|Q6NUK1|SCMC1_HUMAN	SLC25A24	SCMC1_HUMAN Calcium-binding mitochondrial carrier protein SCaMC-1	23	5.73271	5.67494	6.61644	6.60573	6.48154	6.30136	6.81073	6.5713	6.15746	6.54123	1.06233	0.0872283	0.0851579	0.0323861
sp|Q8WWY3|PRP31_HUMAN	PRPF31	PRP31_HUMAN U4/U6 small nuclear ribonucleoprotein Prp31	16	6.19517	5.77887	6.35331	6.40315	6.26844	6.37382	6.97104	6.65754	6.18262	6.56771	1.06229	0.0871709	0.0458375	0.0479801
sp|O15427|MOT4_HUMAN	SLC16A3	MOT4_HUMAN Monocarboxylate transporter 4	10	6.27714	5.94371	6.10525	6.06927	6.30984	6.19882	6.62722	6.77795	6.09884	6.47846	1.06224	0.0871149	0.0225558	0.0416532
sp|P10619|PPGB_HUMAN	CTSA	PPGB_HUMAN Lysosomal protective protein	10	5.98141	5.76392	5.77552	6.19904	5.94114	6.20122	6.54995	6.50378	5.92997	6.29902	1.06223	0.0871026	0.0346245	0.0451392
sp|P22223|CADH3_HUMAN	CDH3	CADH3_HUMAN Cadherin-3	22	5.94034	6.27491	6.12104	6.14686	6.07614	6.80297	6.59591	6.53178	6.12079	6.5017	1.06223	0.0870997	0.022519	0.0471263
sp|Q96AJ1|CLUA1_HUMAN	CLUAP1	CLUA1_HUMAN Clusterin-associated protein 1	1	5.5317	6.36557	6.11807	6.68541	6.60577	5.89136	6.7444	6.99632	6.17519	6.55946	1.06223	0.0870947	0.0789971	0.0722365
sp|O43505|B3GN1_HUMAN	B3GNT1	B3GN1_HUMAN N-acetyllactosaminide beta-1,3-N-acetylglucosaminyltransferase	1	6.36109	5.99903	6.23731	4.9443	6.2281	6.73542	6.26423	5.77869	5.88543	6.25161	1.06222	0.0870793	0.10962	0.0625299
sp|Q9UQ16-4|DYN3_HUMAN	DNM3	DYN3_HUMAN Isoform 4 of Dynamin-3	19	6.16948	5.74055	6.27636	6.4404	6.35704	6.09522	6.88391	6.82151	6.1567	6.53942	1.06216	0.087006	0.0485601	0.0578149
sp|Q96S44|PRPK_HUMAN	TP53RK	PRPK_HUMAN TP53-regulating kinase	8	5.94938	5.8525	6.50886	6.02836	6.44439	6.29765	6.80914	6.29905	6.08478	6.46256	1.06209	0.0869013	0.0479438	0.0373063
sp|Q9UKN8|TF3C4_HUMAN	GTF3C4	TF3C4_HUMAN General transcription factor 3C polypeptide 4	31	6.0916	5.95716	6.17286	6.23934	6.37622	6.34589	6.69122	6.56565	6.11524	6.49474	1.06206	0.0868638	0.0198644	0.0251175
sp|O95299|NDUAA_HUMAN	NDUFA10	NDUAA_HUMAN NADH dehydrogenase [ubiquinone] 1 alpha subcomplex subunit 10, mitochondrial	10	6.21643	6.01445	6.56032	6.47222	6.69685	6.4365	6.94885	6.74784	6.31585	6.70751	1.06201	0.0867993	0.0393121	0.0314418
sp|Q9P0L2|MARK1_HUMAN	MARK1	MARK1_HUMAN Serine/threonine-protein kinase MARK1	5	6.04666	5.29551	6.6302	6.22469	6.74755	6.43018	6.36065	6.15916	6.04926	6.42439	1.06201	0.0867985	0.0923571	0.0380087
sp|Q9UJX3|APC7_HUMAN	ANAPC7	APC7_HUMAN Anaphase-promoting complex subunit 7	18	5.99844	6.03739	6.35027	6.47771	6.23952	6.65364	6.76939	6.74306	6.21595	6.6014	1.06201	0.0867971	0.037815	0.0373085
sp|Q9H469|FXL15_HUMAN	FBXL15	FXL15_HUMAN F-box/LRR-repeat protein 15	3	5.37672	5.82362	6.63628	7.06645	5.99293	6.38216	7.31225	6.75984	6.22577	6.61179	1.062	0.0867903	0.122953	0.0850332
sp|Q14258|TRI25_HUMAN	TRIM25	TRI25_HUMAN E3 ubiquitin/ISG15 ligase TRIM25	27	6.11651	6.01567	6.54151	6.43668	6.65395	6.6226	6.82365	6.56593	6.27759	6.66653	1.06196	0.0867252	0.0400373	0.016635
sp|P50454|SERPH_HUMAN	SERPINH1	SERPH_HUMAN Serpin H1	40	5.85469	5.74965	6.2529	6.31814	6.24485	6.19036	6.67671	6.56059	6.04385	6.41813	1.06193	0.0866858	0.0469223	0.0369876
sp|Q9ULJ8-3|NEB1_HUMAN	PPP1R9A	NEB1_HUMAN Isoform 3 of Neurabin-1	3	6.43168	5.90743	5.90548	6.11284	6.7312	6.23378	6.30963	6.59092	6.08936	6.46638	1.06192	0.0866688	0.0407414	0.0361921
sp|P78312|F193A_HUMAN	FAM193A	F193A_HUMAN Protein FAM193A	3	6.03673	5.66649	5.94594	6.26689	6.77446	6.33091	5.98936	6.30194	5.97901	6.34917	1.06191	0.0866602	0.0415297	0.0508657
sp|Q9H9P8|L2HDH_HUMAN	L2HGDH	L2HDH_HUMAN L-2-hydroxyglutarate dehydrogenase, mitochondrial	10	6.17895	5.78238	6.66824	6.59757	6.57246	6.54337	7.00315	6.66929	6.30679	6.69707	1.06188	0.0866248	0.0651541	0.0315116
sp|Q9HBD1|RC3H2_HUMAN	RC3H2	RC3H2_HUMAN Roquin-2	3	5.97617	5.99437	5.99532	6.57968	6.40947	6.49902	7.10249	6.05311	6.13638	6.51602	1.06187	0.0866026	0.0481817	0.0668877
sp|Q9BZF3-5|OSBL6_HUMAN	OSBPL6	OSBL6_HUMAN Isoform 5 of Oxysterol-binding protein-related protein 6	8	5.6739	5.73201	6.34109	6.72118	6.12719	6.33941	6.72668	6.78842	6.11705	6.49543	1.06186	0.086589	0.0822714	0.0486248
sp|Q9BVS4|RIOK2_HUMAN	RIOK2	RIOK2_HUMAN Serine/threonine-protein kinase RIO2	8	6.3956	5.92286	6.21468	6.26735	6.30658	6.75563	6.35169	6.92008	6.20012	6.58349	1.06183	0.086557	0.0322329	0.0458491
tr|J3QQY7|J3QQY7_HUMAN	TANC2	J3QQY7_HUMAN Protein TANC2 (Fragment)	1	4.89306	6.17454	7.33995	7.68328	8.08447	5.76956	6.21272	7.63677	6.52271	6.92588	1.06181	0.0865265	0.193758	0.160205
sp|Q9H3U1|UN45A_HUMAN	UNC45A	UN45A_HUMAN Protein unc-45 homolog A	39	6.03945	5.90271	6.40682	6.37403	6.29802	6.38171	6.86867	6.70237	6.18075	6.56269	1.0618	0.0865053	0.0402575	0.0408811
sp|Q6IPR1|LYRM5_HUMAN	LYRM5	LYRM5_HUMAN LYR motif-containing protein 5	2	5.36143	6.7681	5.07556	5.65588	6.12161	5.93719	5.73898	6.47334	5.71524	6.06778	1.06168	0.0863541	0.12962	0.0514638
sp|Q5VYK3|ECM29_HUMAN	ECM29	ECM29_HUMAN Proteasome-associated protein ECM29 homolog	61	5.93314	5.86064	6.42169	6.60932	6.34306	6.36827	6.88781	6.75631	6.2062	6.58886	1.06166	0.0863198	0.0590501	0.0417015
sp|Q92783|STAM1_HUMAN	STAM	STAM1_HUMAN Signal transducing adapter molecule 1	37	6.2231	6.34258	5.96329	5.88333	6.09695	7.01624	6.5401	6.26069	6.10308	6.47849	1.06151	0.0861224	0.035345	0.0621262
sp|O15091|MRRP3_HUMAN	KIAA0391	MRRP3_HUMAN Mitochondrial ribonuclease P protein 3	13	6.11754	5.98603	6.51986	6.15987	6.49212	6.32628	6.74515	6.74304	6.19583	6.57665	1.06146	0.0860559	0.0368558	0.0311503
sp|P42684|ABL2_HUMAN	ABL2	ABL2_HUMAN Abelson tyrosine-protein kinase 2	5	6.01305	5.82499	6.48492	6.13271	6.55214	6.44493	6.4817	6.47898	6.11392	6.48944	1.06142	0.0859963	0.0454502	0.0069382
sp|Q9NX95|SYBU_HUMAN	SYBU	SYBU_HUMAN Syntabulin	1	6.86424	7.0324	6.67622	5.05758	7.81776	6.61225	6.1798	6.59477	6.40761	6.80114	1.06142	0.0859913	0.142284	0.103894
sp|Q86UA1|PRP39_HUMAN	PRPF39	PRP39_HUMAN Pre-mRNA-processing factor 39	9	5.58327	5.65055	6.3408	6.39386	6.11291	5.95318	6.73217	6.64175	5.99212	6.36	1.06139	0.0859608	0.0725394	0.0605192
sp|P43353|AL3B1_HUMAN	ALDH3B1	AL3B1_HUMAN Aldehyde dehydrogenase family 3 member B1	2	5.6628	5.42826	6.15433	6.35348	6.1475	6.58848	6.10054	6.21103	5.89972	6.26189	1.06139	0.0859517	0.072518	0.0355142
sp|Q92997|DVL3_HUMAN	DVL3	DVL3_HUMAN Segment polarity protein dishevelled homolog DVL-3	3	6.01636	5.73191	6.37568	6.66755	6.00335	6.20343	7.32906	6.77729	6.19787	6.57828	1.06138	0.0859373	0.0660191	0.0909696
sp|O96005|CLPT1_HUMAN	CLPTM1	CLPT1_HUMAN Cleft lip and palate transmembrane protein 1	22	6.0759	6.05025	6.32535	6.31543	6.4528	6.41599	6.67905	6.73901	6.19173	6.57171	1.06137	0.0859262	0.0240618	0.0245204
sp|Q86Y56|HEAT2_HUMAN	HEATR2	HEAT2_HUMAN HEAT repeat-containing protein 2	22	6.01143	6.02972	6.53677	6.53096	6.32937	6.5766	6.93795	6.80525	6.27722	6.66229	1.06134	0.0858929	0.0472266	0.0401453
sp|O43709|WBS22_HUMAN	WBSCR22	WBS22_HUMAN Ribosome biogenesis methyltransferase WBSCR22	6	5.6932	5.91915	6.25025	6.11042	6.05197	6.23076	6.78946	6.37137	5.99326	6.36089	1.06134	0.0858889	0.0403335	0.0493941
sp|O94854|K0754_HUMAN	KIAA0754	K0754_HUMAN Uncharacterized protein KIAA0754	3	5.1705	5.76379	6.9513	6.14956	5.82053	5.94535	6.84407	6.89888	6.00879	6.37721	1.06131	0.0858509	0.124202	0.0899199
sp|Q12873-3|CHD3_HUMAN	CHD3	CHD3_HUMAN Isoform 3 of Chromodomain-helicase-DNA-binding protein 3	14	6.50261	5.94611	6.06504	6.26796	6.67869	6.41301	6.6739	6.53464	6.19543	6.57506	1.06128	0.0857996	0.0394031	0.0193185
sp|Q7RTS9|DYM_HUMAN	DYM	DYM_HUMAN Dymeclin	5	5.84186	5.87079	6.5253	6.57393	6.30593	6.21066	6.78259	7.03089	6.20297	6.58252	1.06119	0.0856803	0.0646363	0.0592183
sp|Q5T0F9|C2D1B_HUMAN	CC2D1B	C2D1B_HUMAN Coiled-coil and C2 domain-containing protein 1B	14	5.68902	5.68409	6.3544	6.22549	5.96202	6.15923	6.79712	6.49986	5.98825	6.35456	1.06117	0.0856572	0.0588362	0.0581204
sp|P51153|RAB13_HUMAN	RAB13	RAB13_HUMAN Ras-related protein Rab-13	12	6.03587	5.99304	6.24545	6.20609	6.32886	6.56843	6.5819	6.49814	6.12011	6.49433	1.06115	0.0856231	0.0203089	0.0179029
sp|Q99487|PAFA2_HUMAN	PAFAH2	PAFA2_HUMAN Platelet-activating factor acetylhydrolase 2, cytoplasmic	4	5.59851	6.00615	5.89885	6.27335	6.43483	6.30134	6.33812	6.15522	5.94421	6.30738	1.0611	0.085554	0.0469578	0.0183933
sp|Q99643|C560_HUMAN	SDHC	C560_HUMAN Succinate dehydrogenase cytochrome b560 subunit, mitochondrial	2	6.89253	7.15433	6.74846	7.20782	7.48228	7.18519	7.17462	7.86962	7.00078	7.42793	1.06101	0.085443	0.0310579	0.0440468
sp|P51790-2|CLCN3_HUMAN	CLCN3	CLCN3_HUMAN Isoform 2 of H(+)/Cl(-) exchange transporter 3	7	5.80522	6.02177	6.10061	5.92008	6.33171	6.40846	6.18977	6.3724	5.96192	6.32558	1.061	0.0854219	0.0214631	0.0151477
sp|Q15382|RHEB_HUMAN	RHEB	RHEB_HUMAN GTP-binding protein Rheb	16	6.18071	5.93137	6.36607	5.92085	6.46322	6.20759	6.66328	6.5531	6.09975	6.4718	1.06099	0.0854164	0.0351408	0.030009
sp|Q8N3A8|PARP8_HUMAN	PARP8	PARP8_HUMAN Poly [ADP-ribose] polymerase 8	1	5.22305	4.56224	7.45784	6.39239	5.82861	5.66923	6.86948	6.70917	5.90888	6.26912	1.06097	0.0853788	0.21666	0.0969396
sp|O43172|PRP4_HUMAN	PRPF4	PRP4_HUMAN U4/U6 small nuclear ribonucleoprotein Prp4	20	6.00236	5.61907	6.19559	6.3858	6.11273	6.23808	6.65146	6.67211	6.0507	6.41859	1.0608	0.0851543	0.0541392	0.0444896
sp|P49643|PRI2_HUMAN	PRIM2	PRI2_HUMAN DNA primase large subunit	12	5.72146	5.99913	6.35747	6.41741	6.46546	6.33469	6.63158	6.5529	6.12387	6.49616	1.06079	0.0851435	0.0531843	0.0195876
sp|Q6AI39|GSC1L_HUMAN	GLTSCR1L	GSC1L_HUMAN GLTSCR1-like protein	1	6.94194	4.95369	7.39683	6.40146	7.81942	5.89856	7.25576	6.28145	6.42348	6.8138	1.06076	0.085104	0.165171	0.129274
sp|O95394-4|AGM1_HUMAN	PGM3	AGM1_HUMAN Isoform 3 of Phosphoacetylglucosamine mutase	25	5.62535	5.76349	6.20227	6.40468	5.92993	6.05485	6.71145	6.75712	5.99895	6.36334	1.06074	0.0850742	0.0609428	0.0678514
sp|P36776|LONM_HUMAN	LONP1	LONM_HUMAN Lon protease homolog, mitochondrial	38	6.07005	5.75515	6.57109	6.25918	6.48719	6.30588	6.64258	6.71691	6.16387	6.53814	1.06072	0.0850444	0.0554747	0.0278416
sp|Q66K64|DCA15_HUMAN	DCAF15	DCA15_HUMAN DDB1- and CUL4-associated factor 15	4	5.72804	6.04194	6.14757	6.94237	6.30587	6.26487	6.58195	7.21594	6.21498	6.59216	1.06069	0.085001	0.0831252	0.0666014
sp|Q8IUC4|RHPN2_HUMAN	RHPN2	RHPN2_HUMAN Rhophilin-2	13	5.9794	5.54832	6.67781	6.4772	6.32943	6.20965	7.07639	6.56516	6.17068	6.54516	1.06069	0.0849978	0.0823707	0.0586258
sp|Q9BVC3|DCC1_HUMAN	DSCC1	DCC1_HUMAN Sister chromatid cohesion protein DCC1	15	5.86587	5.77955	6.10688	6.7729	6.08897	6.09195	6.99227	6.83848	6.1313	6.50292	1.06061	0.0848941	0.0733291	0.0738725
sp|O75643|U520_HUMAN	SNRNP200	U520_HUMAN U5 small nuclear ribonucleoprotein 200 kDa helicase	101	6.09994	5.73751	6.44261	6.25326	6.49404	6.30857	6.77982	6.43707	6.13333	6.50488	1.06058	0.0848508	0.0487157	0.0305979
sp|Q13177|PAK2_HUMAN	PAK2	PAK2_HUMAN Serine/threonine-protein kinase PAK 2	40	5.92014	5.84174	6.09273	6.08702	6.17413	6.01648	6.59658	6.60395	5.98541	6.34779	1.06054	0.0848038	0.0208548	0.0470359
sp|Q5HYA8|MKS3_HUMAN	TMEM67	MKS3_HUMAN Meckelin	6	6.02432	6.2717	6.17975	6.17003	6.35157	6.38915	6.76639	6.63083	6.16145	6.53449	1.06054	0.0848036	0.0165959	0.0303047
sp|Q9H0V9-2|LMA2L_HUMAN	LMAN2L	LMA2L_HUMAN Isoform 2 of VIP36-like protein	6	5.64157	5.57965	6.40548	6.6038	6.05719	6.37787	6.45558	6.80671	6.05762	6.42434	1.06054	0.0847954	0.0863525	0.0479047
sp|P39748|FEN1_HUMAN	FEN1	FEN1_HUMAN Flap endonuclease 1	20	6.25408	5.93999	6.36853	6.24294	6.45518	6.40035	6.71188	6.73819	6.20139	6.5764	1.06047	0.0847076	0.0295538	0.0263694
sp|Q9NPL8|TIDC1_HUMAN	TIMMDC1	TIDC1_HUMAN Complex I assembly factor TIMMDC1, mitochondrial	6	6.04808	6.14772	5.78484	6.61018	6.38386	6.41324	6.83275	6.44738	6.1477	6.51931	1.06045	0.0846708	0.055993	0.0322991
sp|P46977|STT3A_HUMAN	STT3A	STT3A_HUMAN Dolichyl-diphosphooligosaccharide--protein glycosyltransferase subunit STT3A	17	6.22081	5.81396	6.5661	6.39263	6.54422	6.28486	7.05388	6.62098	6.24838	6.62599	1.06043	0.0846539	0.0515485	0.0482138
sp|P30876|RPB2_HUMAN	POLR2B	RPB2_HUMAN DNA-directed RNA polymerase II subunit RPB2	35	5.97814	5.88683	6.49555	6.48125	6.39554	6.45001	6.81249	6.68426	6.21044	6.58558	1.0604	0.0846133	0.0520362	0.0298229
sp|Q9BUK6|MSTO1_HUMAN	MSTO1	MSTO1_HUMAN Protein misato homolog 1	10	5.95729	5.73159	6.31886	6.59981	6.10853	5.94483	7.11203	6.92808	6.15189	6.52337	1.06038	0.0845878	0.0624667	0.089259
sp|P48556|PSMD8_HUMAN	PSMD8	PSMD8_HUMAN 26S proteasome non-ATPase regulatory subunit 8	22	5.86549	5.95794	5.99598	6.30176	6.17645	6.10438	6.59621	6.70067	6.03029	6.39443	1.06038	0.0845872	0.0313569	0.0465795
sp|Q8WV60|PTCD2_HUMAN	PTCD2	PTCD2_HUMAN Pentatricopeptide repeat-containing protein 2, mitochondrial	3	5.85948	6.23586	6.17861	6.52173	6.25853	6.49947	6.78898	6.7459	6.19892	6.57322	1.06038	0.0845834	0.0438045	0.0373515
sp|Q96QK1|VPS35_HUMAN	VPS35	VPS35_HUMAN Vacuolar protein sorting-associated protein 35	31	6.00128	6.04321	6.14088	6.22431	6.32399	6.29632	6.71423	6.54868	6.10242	6.47081	1.06037	0.0845637	0.0164064	0.030561
sp|Q9BST9|RTKN_HUMAN	RTKN	RTKN_HUMAN Rhotekin	11	6.00468	5.77752	6.64267	6.62388	6.40619	6.55068	6.9362	6.66734	6.26219	6.6401	1.06035	0.0845388	0.0700207	0.0338015
sp|O95757|HS74L_HUMAN	HSPA4L	HS74L_HUMAN Heat shock 70 kDa protein 4L	35	5.49867	5.77376	6.00512	6.66611	5.90198	6.04191	6.58974	6.85454	5.98591	6.34704	1.06033	0.0845127	0.0832757	0.0709075
sp|Q96P16|RPR1A_HUMAN	RPRD1A	RPR1A_HUMAN Regulation of nuclear pre-mRNA domain-containing protein 1A	12	5.98649	5.67746	6.37738	6.46974	6.20857	6.13802	6.81007	6.83277	6.12777	6.49736	1.06031	0.0844915	0.059737	0.0577799
sp|O15067|PUR4_HUMAN	PFAS	PUR4_HUMAN Phosphoribosylformylglycinamidine synthase	44	5.62109	5.76688	6.20469	6.65196	5.92963	6.02192	6.77772	6.97639	6.06115	6.42642	1.06026	0.0844214	0.0767909	0.0821583
sp|P53370|NUDT6_HUMAN	NUDT6	NUDT6_HUMAN Nucleoside diphosphate-linked moiety X motif 6	1	5.3461	4.89315	6.60033	6.40819	5.07199	6.47544	6.59311	6.50747	5.81194	6.162	1.06023	0.0843788	0.141823	0.118204
sp|Q9NPJ6|MED4_HUMAN	MED4	MED4_HUMAN Mediator of RNA polymerase II transcription subunit 4	9	6.13544	6.31973	5.82512	5.82094	6.27655	6.65857	6.32463	6.2928	6.02531	6.38814	1.06022	0.0843605	0.0407272	0.028395
sp|Q9H9F9|ARP5_HUMAN	ACTR5	ARP5_HUMAN Actin-related protein 5	8	6.30258	5.40451	6.11255	6.52419	6.20613	6.27782	6.84668	6.47822	6.08596	6.45221	1.06018	0.0843097	0.0795999	0.0444938
sp|O43822-4|CU002_HUMAN	C21orf2	CU002_HUMAN Isoform 4 of Protein C21orf2	1	5.5872	6.17957	5.78794	6.87473	6.77843	5.54531	5.66394	7.91141	6.10736	6.47477	1.06016	0.0842806	0.0929446	0.170998
sp|P36404|ARL2_HUMAN	ARL2	ARL2_HUMAN ADP-ribosylation factor-like protein 2	12	5.96189	6.04553	6.18897	6.27872	6.56572	6.38402	6.44738	6.54893	6.11878	6.48651	1.0601	0.0841996	0.0232064	0.0132636
sp|P14868|SYDC_HUMAN	DARS	SYDC_HUMAN Aspartate--tRNA ligase, cytoplasmic	54	5.94096	5.87648	6.42155	6.49592	6.31595	6.38947	6.7263	6.78913	6.18373	6.55521	1.06007	0.0841658	0.0517623	0.0361757
sp|P49903|SPS1_HUMAN	SEPHS1	SPS1_HUMAN Selenide, water dikinase 1	19	6.05436	6.06627	6.06338	6.0445	6.34158	6.56325	6.32348	6.45465	6.05713	6.42074	1.06003	0.0841058	0.00162262	0.0173395
sp|Q9C0C9|UBE2O_HUMAN	UBE2O	UBE2O_HUMAN Ubiquitin-conjugating enzyme E2 O	59	5.9285	5.86571	6.12158	6.52199	6.09594	6.32113	6.73081	6.75679	6.10945	6.47617	1.06003	0.084099	0.0484164	0.0498125
sp|Q96JC1|VPS39_HUMAN	VPS39	VPS39_HUMAN Vam6/Vps39-like protein	11	5.64249	6.02346	6.39679	6.35692	6.65509	6.2544	6.37475	6.5995	6.10491	6.47093	1.05995	0.084003	0.0574609	0.0291281
sp|Q96HP0|DOCK6_HUMAN	DOCK6	DOCK6_HUMAN Dedicator of cytokinesis protein 6	11	5.89929	5.90436	6.81066	6.50071	6.65576	6.42386	7.07412	6.4659	6.27876	6.65491	1.05991	0.0839406	0.0721905	0.0446472
sp|Q9BZE9-2|ASPC1_HUMAN	ASPSCR1	ASPC1_HUMAN Isoform 2 of Tether containing UBX domain for GLUT4	15	5.9163	5.99544	6.09488	6.25199	6.04668	6.49875	6.666	6.5002	6.06465	6.42791	1.0599	0.0839242	0.0238584	0.041382
sp|Q9H1P3|OSBL2_HUMAN	OSBPL2	OSBL2_HUMAN Oxysterol-binding protein-related protein 2	6	5.46066	5.89882	6.21131	6.48696	5.69186	6.18025	6.62467	7.00105	6.01444	6.37446	1.05986	0.0838728	0.0732374	0.0886908
sp|Q8NFW8|NEUA_HUMAN	CMAS	NEUA_HUMAN N-acylneuraminate cytidylyltransferase	6	5.51103	5.52501	6.43069	6.28771	6.24727	5.95703	6.52358	6.44829	5.93861	6.29404	1.05985	0.0838616	0.0823735	0.0402195
sp|O75044|SRGP2_HUMAN	SRGAP2	SRGP2_HUMAN SLIT-ROBO Rho GTPase-activating protein 2	12	5.9235	5.6924	6.24946	6.56813	6.77306	6.20795	6.48613	6.42794	6.10837	6.47377	1.05982	0.0838181	0.0625886	0.0359495
sp|P49662|CASP4_HUMAN	CASP4	CASP4_HUMAN Caspase-4	1	6.49122	5.62666	5.47066	6.9737	6.23436	6.40409	6.41674	6.97569	6.14056	6.50772	1.05979	0.0837819	0.116297	0.0496136
tr|G5E9Z2|G5E9Z2_HUMAN	CLPTM1L	G5E9Z2_HUMAN Cisplatin resistance related protein CRR9p, isoform CRA_c	1	6.25749	5.6813	7.90568	6.66515	6.41312	6.3923	7.97482	7.31412	6.62741	7.02359	1.05978	0.0837645	0.142278	0.109067
sp|Q9BRK5|CAB45_HUMAN	SDF4	CAB45_HUMAN 45 kDa calcium-binding protein	12	5.72529	5.88131	6.09447	6.24009	6.14875	6.21856	6.47896	6.52389	5.98529	6.34254	1.05969	0.0836396	0.0380082	0.0294155
sp|O76094|SRP72_HUMAN	SRP72	SRP72_HUMAN Signal recognition particle subunit SRP72	23	6.2136	5.73263	6.14908	6.38875	6.321	6.20099	6.86315	6.56019	6.12101	6.48633	1.05968	0.0836321	0.0454205	0.0450538
tr|H7BZJ3|H7BZJ3_HUMAN	PDIA3	H7BZJ3_HUMAN Thioredoxin (Fragment)	3	6.02642	5.97344	5.73402	6.12065	6.08241	6.8038	6.3749	6.01663	5.96363	6.31944	1.05966	0.0836042	0.0276236	0.0567291
sp|Q9BYT3|STK33_HUMAN	STK33	STK33_HUMAN Serine/threonine-protein kinase 33	1	6.20739	5.70984	6.69878	6.35261	6.47765	6.24111	6.41752	7.32119	6.24216	6.61437	1.05963	0.083559	0.0657459	0.0728397
sp|O43395|PRPF3_HUMAN	PRPF3	PRPF3_HUMAN U4/U6 small nuclear ribonucleoprotein Prp3	16	6.19508	5.89376	5.73554	6.12081	6.26524	6.24327	6.32202	6.54136	5.9863	6.34297	1.05958	0.0834951	0.0351895	0.0214973
sp|P61201-2|CSN2_HUMAN	COPS2	CSN2_HUMAN Isoform 2 of COP9 signalosome complex subunit 2	25	5.7685	5.90181	5.9951	6.40649	6.16094	6.25812	6.47092	6.61547	6.01797	6.37636	1.05955	0.0834555	0.0457291	0.0322043
sp|Q9H900|ZWILC_HUMAN	ZWILCH	ZWILC_HUMAN Protein zwilch homolog	7	5.79691	6.08085	6.29824	6.07935	6.31026	5.79559	6.96542	6.62761	6.06384	6.42472	1.05951	0.0834025	0.033894	0.0774305
sp|Q96CB8|INT12_HUMAN	INTS12	INT12_HUMAN Integrator complex subunit 12	4	5.86271	5.67586	5.60969	6.30279	6.30003	6.34204	6.4384	5.76502	5.86276	6.21137	1.05946	0.0833315	0.0532692	0.0488062
sp|Q9Y6A2|CP46A_HUMAN	CYP46A1	CP46A_HUMAN Cholesterol 24-hydroxylase	1	5.13215	5.77973	6.86823	7.15632	6.76984	6.47062	6.4033	6.77489	6.23411	6.60466	1.05944	0.0833018	0.151424	0.0296151
sp|Q96K12|FACR2_HUMAN	FAR2	FACR2_HUMAN Fatty acyl-CoA reductase 2	2	5.66385	6.24826	6.1476	6.4957	6.31185	6.56363	6.4526	6.68624	6.13885	6.50358	1.05941	0.0832651	0.0568207	0.0245264
sp|Q15555|MARE2_HUMAN	MAPRE2	MARE2_HUMAN Microtubule-associated protein RP/EB family member 2	9	5.91113	5.78926	6.39705	6.31483	6.33469	6.31654	6.67645	6.53482	6.10307	6.46563	1.05941	0.0832553	0.0488437	0.0265802
sp|Q96QE5|TEFM_HUMAN	TEFM	TEFM_HUMAN Transcription elongation factor, mitochondrial	5	6.13096	5.7278	6.33438	6.21328	6.29553	6.47314	6.75113	6.33435	6.10161	6.46354	1.05932	0.0831352	0.0430764	0.0319223
sp|Q8IY45|AMN1_HUMAN	AMN1	AMN1_HUMAN Protein AMN1 homolog	1	6.08909	6.43484	7.16979	7.60974	5.66437	6.90136	8.46865	7.88858	6.82587	7.23074	1.05931	0.0831314	0.101093	0.169891
sp|Q86WB0|NIPA_HUMAN	ZC3HC1	NIPA_HUMAN Nuclear-interacting partner of ALK	10	5.58343	6.80549	6.17963	6.16821	6.20036	6.51019	6.68219	6.81089	6.18419	6.55091	1.0593	0.0831101	0.0807004	0.0403267
sp|Q9HD23|MRS2_HUMAN	MRS2	MRS2_HUMAN Magnesium transporter MRS2 homolog, mitochondrial	6	5.56894	5.6514	6.53402	6.84926	6.20282	6.18572	6.67988	6.99394	6.1509	6.51559	1.05929	0.0830971	0.10379	0.0602584
sp|Q9Y2X7-3|GIT1_HUMAN	GIT1	GIT1_HUMAN Isoform 3 of ARF GTPase-activating protein GIT1	19	5.74273	5.66404	6.29382	6.53518	6.15147	6.04513	6.77694	6.69886	6.05894	6.4181	1.05928	0.0830803	0.069887	0.058145
sp|Q9Y2T2|AP3M1_HUMAN	AP3M1	AP3M1_HUMAN AP-3 complex subunit mu-1	11	6.14548	5.62668	6.42436	6.48874	6.61348	6.1577	6.69976	6.67747	6.17131	6.5371	1.05927	0.0830734	0.063595	0.0390945
sp|Q9Y606|TRUA_HUMAN	PUS1	TRUA_HUMAN tRNA pseudouridine synthase A, mitochondrial	17	5.81092	5.83792	6.20155	6.65664	6.12574	6.14101	6.72304	6.96975	6.12676	6.48989	1.05927	0.0830692	0.0645728	0.0653094
sp|Q15120-2|PDK3_HUMAN	PDK3	PDK3_HUMAN Isoform 2 of [Pyruvate dehydrogenase (acetyl-transferring)] kinase isozyme 3, mitochondrial	7	5.82941	6.03071	6.46011	6.43232	6.26134	6.25945	6.95068	6.74742	6.18814	6.55472	1.05924	0.0830295	0.0499883	0.0533729
sp|Q969F1|TF3C6_HUMAN	GTF3C6	TF3C6_HUMAN General transcription factor 3C polypeptide 6	1	5.77498	6.79913	5.47519	7.30255	6.64019	6.12381	8.19648	5.89298	6.33796	6.71336	1.05923	0.083017	0.13525	0.154456
sp|O00159|MYO1C_HUMAN	MYO1C	MYO1C_HUMAN Unconventional myosin-Ic	24	6.02617	5.65931	6.35239	6.54901	6.33538	6.13435	6.93052	6.64263	6.14672	6.51072	1.05922	0.0830003	0.0634442	0.0536499
sp|P11831|SRF_HUMAN	SRF	SRF_HUMAN Serum response factor	1	7.18182	5.00347	5.29296	5.56334	6.61282	6.83939	5.08644	5.8672	5.7604	6.10146	1.05921	0.0829867	0.169225	0.130128
sp|Q9UKU0-8|ACSL6_HUMAN	ACSL6	ACSL6_HUMAN Isoform 8 of Long-chain-fatty-acid--CoA ligase 6	2	6.75447	7.07683	7.72918	7.34875	6.96104	7.32514	8.68816	7.64228	7.22731	7.65415	1.05906	0.0827848	0.0572078	0.0971248
sp|P19623|SPEE_HUMAN	SRM	SPEE_HUMAN Spermidine synthase	22	5.59899	5.85221	6.56145	6.37165	6.06275	6.35235	6.47784	6.93098	6.09607	6.45598	1.05904	0.0827555	0.0733046	0.0559535
sp|Q96Q42|ALS2_HUMAN	ALS2	ALS2_HUMAN Alsin	2	6.24382	5.70282	6.69624	6.37068	6.32782	6.26762	7.51597	6.37885	6.25339	6.62256	1.05904	0.0827516	0.0661335	0.090197
sp|A2VDJ0-5|T131L_HUMAN	KIAA0922	T131L_HUMAN Isoform 4 of Transmembrane protein 131-like	3	6.02773	6.19441	6.21626	6.22379	7.11296	6.48303	6.03017	6.49178	6.16555	6.52948	1.05903	0.0827402	0.0150383	0.0681101
sp|Q9Y251|HPSE_HUMAN	HPSE	HPSE_HUMAN Heparanase	5	6.02988	5.85651	6.23531	6.25225	6.33629	6.72892	6.46384	6.28339	6.09349	6.45311	1.05902	0.0827265	0.0307785	0.0308164
sp|O15085-2|ARHGB_HUMAN	ARHGEF11	ARHGB_HUMAN Isoform 2 of Rho guanine nucleotide exchange factor 11	9	6.1972	6.04277	6.13485	6.3536	5.94487	6.53573	6.6914	7.01533	6.1821	6.54683	1.059	0.0826989	0.0211495	0.0684732
sp|Q86WV6|STING_HUMAN	TMEM173	STING_HUMAN Stimulator of interferon genes protein	3	6.1577	6.52306	6.5776	5.92511	6.48616	5.88422	6.51513	7.783	6.29587	6.66713	1.05897	0.0826601	0.0491738	0.119803
sp|P22830-2|HEMH_HUMAN	FECH	HEMH_HUMAN Isoform 2 of Ferrochelatase, mitochondrial	13	5.94811	5.66714	6.10897	6.72284	6.31721	5.96659	6.79947	6.80535	6.11177	6.47215	1.05897	0.0826571	0.0730441	0.0629361
sp|O75061-2|AUXI_HUMAN	DNAJC6	AUXI_HUMAN Isoform 2 of Putative tyrosine-protein phosphatase auxilin	3	5.55668	6.51483	5.58729	6.25686	6.96194	5.7502	6.28521	6.32775	5.97891	6.33127	1.05893	0.0826124	0.0805668	0.0783133
sp|P30153|2AAA_HUMAN	PPP2R1A	2AAA_HUMAN Serine/threonine-protein phosphatase 2A 65 kDa regulatory subunit A alpha isoform	30	6.37457	6.11994	6.23889	6.48495	6.61998	6.37004	6.82766	6.88688	6.30459	6.67614	1.05893	0.0826122	0.0252191	0.0350452
sp|Q3ZCQ8-2|TIM50_HUMAN	TIMM50	TIM50_HUMAN Isoform 2 of Mitochondrial import inner membrane translocase subunit TIM50	9	5.78837	5.8186	6.44736	6.41725	6.1884	6.65296	6.69955	6.37218	6.11789	6.47827	1.05891	0.0825738	0.0594105	0.0372565
sp|Q9BQ70|TCF25_HUMAN	TCF25	TCF25_HUMAN Transcription factor 25	20	6.08332	5.73599	6.42406	6.5342	6.34566	6.46626	6.95767	6.46664	6.19439	6.55906	1.05887	0.0825257	0.0582579	0.0414349
sp|O14653-2|GOSR2_HUMAN	GOSR2	GOSR2_HUMAN Isoform B of Golgi SNAP receptor complex member 2	5	5.93419	5.80191	5.79866	6.0374	5.6358	7.1407	6.33506	5.84816	5.89304	6.23993	1.05886	0.0825178	0.0195319	0.107061
sp|O95573|ACSL3_HUMAN	ACSL3	ACSL3_HUMAN Long-chain-fatty-acid--CoA ligase 3	33	6.11329	5.83184	6.43433	6.4946	6.52567	6.35694	6.85073	6.6045	6.21852	6.58446	1.05885	0.082495	0.0494247	0.0311892
sp|Q8N612-2|F16A2_HUMAN	FAM160A2	F16A2_HUMAN Isoform 2 of FTS and Hook-interacting protein	10	5.83207	5.58559	6.4034	6.62295	6.29058	6.14586	6.72628	6.71943	6.111	6.47054	1.05883	0.0824765	0.079127	0.0459459
sp|Q9H6V9-2|CB043_HUMAN	C2orf43	CB043_HUMAN Isoform 2 of UPF0554 protein C2orf43	5	6.24203	6.32772	7.05664	6.5718	6.43378	6.67366	7.60776	7.02421	6.54955	6.93485	1.05883	0.08247	0.05585	0.0735314
tr|H0YDN1|H0YDN1_HUMAN	PLEC	H0YDN1_HUMAN Plectin (Fragment)	1	4.99007	6.23767	6.15751	6.53727	5.1062	8.09063	7.05051	5.08199	5.98063	6.33233	1.05881	0.0824395	0.11375	0.235545
sp|P35626|ARBK2_HUMAN	ADRBK2	ARBK2_HUMAN Beta-adrenergic receptor kinase 2	1	6.22008	5.74363	6.52337	6.68805	5.57844	6.95383	7.42417	6.69804	6.29378	6.66362	1.05876	0.0823788	0.0659114	0.117574
sp|Q86VV8|RTTN_HUMAN	RTTN	RTTN_HUMAN Rotatin	4	6.06333	5.87941	6.20426	6.52579	6.61392	6.50211	6.67011	6.33427	6.1682	6.5301	1.05867	0.0822567	0.0442574	0.0226728
sp|P04843|RPN1_HUMAN	RPN1	RPN1_HUMAN Dolichyl-diphosphooligosaccharide--protein glycosyltransferase subunit 1	58	5.80917	5.96092	6.31829	6.49046	6.45519	6.40052	6.57365	6.59106	6.14471	6.5051	1.05865	0.0822274	0.0511225	0.0141773
sp|Q9H6T0|ESRP2_HUMAN	ESRP2	ESRP2_HUMAN Epithelial splicing regulatory protein 2	4	5.8825	5.78621	6.70495	6.27852	6.13136	6.07395	7.10575	6.78698	6.16305	6.52451	1.05865	0.0822262	0.0680518	0.0773613
sp|P27361|MK03_HUMAN	MAPK3	MK03_HUMAN Mitogen-activated protein kinase 3	26	5.91929	5.89633	6.03353	6.08853	6.09355	6.32238	6.48744	6.43813	5.98442	6.33537	1.05864	0.0822186	0.0153309	0.0276911
sp|Q9Y5Z7|HCFC2_HUMAN	HCFC2	HCFC2_HUMAN Host cell factor 2	1	6.27868	6.62777	5.94518	6.00926	6.65005	6.39746	6.6192	6.65176	6.21522	6.57962	1.05863	0.0821977	0.0499869	0.0185963
sp|P49918|CDN1C_HUMAN	CDKN1C	CDN1C_HUMAN Cyclin-dependent kinase inhibitor 1C	2	5.97393	6.5576	6.01867	6.22136	7.11512	6.36143	6.59781	6.14939	6.19289	6.55594	1.05862	0.0821893	0.0429375	0.0633551
sp|Q969S9|RRF2M_HUMAN	GFM2	RRF2M_HUMAN Ribosome-releasing factor 2, mitochondrial	21	5.94011	5.66696	6.35719	6.54791	6.10084	6.1514	6.82702	6.86869	6.12804	6.48699	1.05857	0.0821224	0.0650498	0.0643676
sp|Q99836|MYD88_HUMAN	MYD88	MYD88_HUMAN Myeloid differentiation primary response protein MyD88	6	5.92675	6.04948	6.65871	6.72058	6.73057	6.287	7.07538	6.74611	6.33888	6.70976	1.05851	0.0820343	0.0645061	0.0482288
sp|Q7Z7M9|GALT5_HUMAN	GALNT5	GALT5_HUMAN Polypeptide N-acetylgalactosaminyltransferase 5	1	5.69185	5.9554	5.4961	6.9761	6.05929	5.59446	6.98648	6.89008	6.02986	6.38258	1.05849	0.082014	0.109173	0.10502
sp|Q16651|PRSS8_HUMAN	PRSS8	PRSS8_HUMAN Prostasin	2	5.29588	5.37419	5.41559	6.52635	5.40522	6.73785	5.80271	5.98888	5.653	5.98367	1.05849	0.0820121	0.103369	0.0933573
sp|P36969|GPX4_HUMAN	GPX4	GPX4_HUMAN Phospholipid hydroperoxide glutathione peroxidase, mitochondrial	10	6.02082	5.9568	6.09828	6.3282	6.59644	6.13103	6.35164	6.75153	6.10102	6.45766	1.05845	0.0819598	0.0265728	0.0422716
sp|Q8WX92|NELFB_HUMAN	NELFB	NELFB_HUMAN Negative elongation factor B	16	6.0925	5.8291	6.26042	6.67522	6.54889	6.39413	6.9317	6.43478	6.21431	6.57737	1.05842	0.0819177	0.0571046	0.037269
sp|P53618|COPB_HUMAN	COPB1	COPB_HUMAN Coatomer subunit beta	51	5.89412	5.74635	6.50499	6.37896	6.26138	6.32432	6.6834	6.68764	6.1311	6.48918	1.0584	0.0818902	0.0599589	0.035161
sp|P98194-3|AT2C1_HUMAN	ATP2C1	AT2C1_HUMAN Isoform 3 of Calcium-transporting ATPase type 2C member 1	14	5.93028	5.95885	6.68205	6.69392	6.24094	6.47704	7.09078	6.92963	6.31627	6.6846	1.05831	0.0817667	0.067983	0.0588927
sp|P82930|RT34_HUMAN	MRPS34	RT34_HUMAN 28S ribosomal protein S34, mitochondrial	14	5.60979	5.83509	6.14816	6.35261	5.96735	6.10554	6.65549	6.61173	5.98641	6.33503	1.05823	0.0816592	0.0549817	0.0552192
sp|Q92797|SYMPK_HUMAN	SYMPK	SYMPK_HUMAN Symplekin	39	6.162	5.74905	6.42801	6.39404	6.33823	6.3346	6.90372	6.59683	6.18328	6.54335	1.05823	0.0816572	0.0505699	0.0412329
sp|Q9ULK4|MED23_HUMAN	MED23	MED23_HUMAN Mediator of RNA polymerase II transcription subunit 23	14	6.00649	5.83285	6.68293	6.64143	6.55595	6.40294	6.91308	6.75591	6.29092	6.65697	1.05819	0.0815935	0.0691218	0.0336031
sp|Q01081|U2AF1_HUMAN	U2AF1	U2AF1_HUMAN Splicing factor U2AF 35 kDa subunit	14	6.17525	6.06926	6.23046	6.17064	6.5555	6.46411	6.64588	6.41405	6.1614	6.51988	1.05818	0.0815877	0.0109021	0.0157052
sp|Q9H9A5-6|CNO10_HUMAN	CNOT10	CNO10_HUMAN Isoform 6 of CCR4-NOT transcription complex subunit 10	10	6.10429	5.75416	6.44755	6.35109	6.56236	6.51127	6.56362	6.45231	6.16427	6.52239	1.0581	0.0814701	0.0501708	0.0080801
sp|O75319|DUS11_HUMAN	DUSP11	DUS11_HUMAN RNA/RNP complex-1-interacting phosphatase	4	5.75826	5.56336	6.52787	6.53841	6.35661	6.66703	6.62672	6.1542	6.09697	6.45114	1.05809	0.0814605	0.0836324	0.0373902
sp|Q9BRG1|VPS25_HUMAN	VPS25	VPS25_HUMAN Vacuolar protein-sorting-associated protein 25	7	5.67214	5.99748	6.37833	6.57356	6.42695	6.25305	6.84848	6.52317	6.15538	6.51291	1.05808	0.0814555	0.0651889	0.0383985
sp|Q6PJ61|FBX46_HUMAN	FBXO46	FBX46_HUMAN F-box only protein 46	1	4.61562	6.70807	6.35918	6.7818	6.6567	5.97769	6.2435	7.006	6.11617	6.47097	1.05801	0.0813546	0.166314	0.0700159
sp|O75891-3|AL1L1_HUMAN	ALDH1L1	AL1L1_HUMAN Isoform 3 of Cytosolic 10-formyltetrahydrofolate dehydrogenase	5	2.76284	2.3909	3.27803	3.21641	3.30772	2.59576	2.81472	3.60556	2.91204	3.08094	1.058	0.0813379	0.143029	0.149085
sp|Q9BYG5|PAR6B_HUMAN	PARD6B	PAR6B_HUMAN Partitioning defective 6 homolog beta	8	5.83434	5.81514	5.97894	6.12034	5.97692	6.1814	6.37682	6.59087	5.93719	6.2815	1.05799	0.0813294	0.0239702	0.0418768
sp|Q92925|SMRD2_HUMAN	SMARCD2	SMRD2_HUMAN SWI/SNF-related matrix-associated actin-dependent regulator of chromatin subfamily D member 2	25	5.73445	5.76763	6.22985	6.28282	6.04255	6.00692	6.74578	6.61181	6.00369	6.35177	1.05798	0.0813087	0.0487777	0.0601154
sp|O60513|B4GT4_HUMAN	B4GALT4	B4GT4_HUMAN Beta-1,4-galactosyltransferase 4	2	5.43346	5.47587	6.74878	6.42447	5.54419	6.12132	6.65317	7.15971	6.02065	6.3696	1.05796	0.0812842	0.110792	0.109058
sp|Q07960|RHG01_HUMAN	ARHGAP1	RHG01_HUMAN Rho GTPase-activating protein 1	26	5.67771	5.85368	5.95657	6.46927	6.01058	6.14204	6.56214	6.62975	5.98931	6.33613	1.05791	0.0812122	0.0567779	0.0482978
sp|Q96B70|LENG9_HUMAN	LENG9	LENG9_HUMAN Leukocyte receptor cluster member 9	1	5.33124	5.68897	6.16999	7.12791	6.71846	6.32734	7.02582	5.6533	6.07953	6.43123	1.05785	0.0811355	0.128108	0.0920777
sp|Q9H269|VPS16_HUMAN	VPS16	VPS16_HUMAN Vacuolar protein sorting-associated protein 16 homolog	7	5.98726	5.94101	6.2889	6.72749	6.60139	6.42394	6.89088	6.47028	6.23617	6.59662	1.0578	0.0810684	0.0580573	0.0318455
sp|Q9H019|MFR1L_HUMAN	MTFR1L	MFR1L_HUMAN Mitochondrial fission regulator 1-like	3	5.80362	6.36388	6.26739	6.02727	6.65168	6.50253	6.56955	6.1514	6.11554	6.46879	1.05776	0.081016	0.0411313	0.0340418
sp|Q2NKX8|ERC6L_HUMAN	ERCC6L	ERC6L_HUMAN DNA excision repair protein ERCC-6-like	35	5.85825	5.80565	6.48377	6.3257	6.25649	6.278	6.72155	6.62931	6.11834	6.47134	1.05769	0.0809231	0.0551814	0.0369038
sp|P20226|TBP_HUMAN	TBP	TBP_HUMAN TATA-box-binding protein	6	6.10499	5.94434	6.57354	6.36052	6.36369	6.29796	7.05827	6.70448	6.24585	6.6061	1.05768	0.0809015	0.0444546	0.0530065
sp|Q9Y6N6|LAMC3_HUMAN	LAMC3	LAMC3_HUMAN Laminin subunit gamma-3	2	5.7113	5.95049	5.84357	5.70133	7.07206	6.56888	5.13156	5.77243	5.80167	6.13623	1.05767	0.0808843	0.0204278	0.139704
sp|Q9BRU9|UTP23_HUMAN	UTP23	UTP23_HUMAN rRNA-processing protein UTP23 homolog	5	6.4167	6.17928	6.18017	6.02092	6.71003	6.96777	6.27645	6.27258	6.19927	6.55671	1.05766	0.0808738	0.0263168	0.0522243
sp|Q8N8I0|SAM12_HUMAN	SAMD12	SAM12_HUMAN Sterile alpha motif domain-containing protein 12	1	5.66415	6.69502	6.0914	5.83979	6.85374	5.78175	7.17334	5.88153	6.07259	6.42259	1.05764	0.0808432	0.0741822	0.108356
sp|Q8NEM2|SHCBP_HUMAN	SHCBP1	SHCBP_HUMAN SHC SH2 domain-binding protein 1	15	6.17369	6.00072	6.35751	6.49696	6.58878	6.54016	6.73814	6.60398	6.25722	6.61777	1.05762	0.0808222	0.0345614	0.012805
sp|Q05BQ5|MBTD1_HUMAN	MBTD1	MBTD1_HUMAN MBT domain-containing protein 1	5	5.52445	5.69598	6.68665	6.50503	5.60805	5.92678	7.14625	7.13729	6.10303	6.45459	1.05761	0.0808009	0.0947264	0.124577
sp|Q13618|CUL3_HUMAN	CUL3	CUL3_HUMAN Cullin-3	49	5.82085	6.13499	6.29011	6.39493	6.23693	6.31658	6.7789	6.72728	6.16022	6.51492	1.05758	0.0807661	0.040612	0.0426296
sp|O94905|ERLN2_HUMAN	ERLIN2	ERLN2_HUMAN Erlin-2	3	6.13757	5.39391	6.7506	6.87949	6.38055	5.97314	7.18353	7.07254	6.29039	6.65244	1.05756	0.0807336	0.108049	0.0865232
sp|Q86TU7|SETD3_HUMAN	SETD3	SETD3_HUMAN Histone-lysine N-methyltransferase setd3	24	5.70541	5.72171	6.09866	6.44506	5.99654	6.23503	6.56147	6.55509	5.99271	6.33703	1.05746	0.0805989	0.0587472	0.043145
sp|Q92574|TSC1_HUMAN	TSC1	TSC1_HUMAN Hamartin	7	6.02332	5.74917	6.44017	6.25264	6.49804	6.29514	6.58387	6.49308	6.11632	6.46753	1.05742	0.0805503	0.0487676	0.0189025
sp|O75477|ERLN1_HUMAN	ERLIN1	ERLN1_HUMAN Erlin-1	15	5.74961	5.81333	6.81298	6.54866	6.21685	6.39524	7.11706	6.62617	6.23114	6.58883	1.0574	0.080525	0.0852126	0.059189
sp|Q9BSJ2-4|GCP2_HUMAN	TUBGCP2	GCP2_HUMAN Isoform 3 of Gamma-tubulin complex component 2	17	5.91578	6.00383	6.38453	6.25263	6.19948	6.32644	6.71361	6.72685	6.13919	6.49159	1.0574	0.0805241	0.0353501	0.0414535
sp|Q9C0E2|XPO4_HUMAN	XPO4	XPO4_HUMAN Exportin-4	22	6.09579	5.81072	6.62331	6.61689	6.54816	6.20802	6.95176	6.88177	6.28668	6.64743	1.05738	0.0804984	0.0639792	0.0514174
sp|Q03135|CAV1_HUMAN	CAV1	CAV1_HUMAN Caveolin-1	16	6.04131	5.93956	6.30028	6.15544	6.29373	6.50889	6.54529	6.49072	6.10915	6.45966	1.05737	0.0804866	0.025365	0.017481
sp|P86791|CCZ1_HUMAN	CCZ1	CCZ1_HUMAN Vacuolar fusion protein CCZ1 homolog	14	5.78247	5.61194	6.27219	6.47903	5.95499	6.12955	6.76087	6.6852	6.03641	6.38265	1.05736	0.0804659	0.0673711	0.0627703
sp|Q9NVX0|HAUS2_HUMAN	HAUS2	HAUS2_HUMAN HAUS augmin-like complex subunit 2	5	5.90085	6.15302	5.92059	5.91272	6.16099	6.70776	6.13319	6.25529	5.9718	6.31431	1.05736	0.0804599	0.0202768	0.0423571
sp|Q5D1E8|ZC12A_HUMAN	ZC3H12A	ZC12A_HUMAN Ribonuclease ZC3H12A	1	5.61477	4.99386	5.32549	6.94901	6.93312	6.50145	5.8073	4.95296	5.72078	6.04871	1.05732	0.0804144	0.149842	0.143051
sp|P31942|HNRH3_HUMAN	HNRNPH3	HNRH3_HUMAN Heterogeneous nuclear ribonucleoprotein H3	8	6.12759	6.29861	6.17626	5.94373	6.53762	6.71781	6.50648	6.19039	6.13655	6.48808	1.05728	0.0803633	0.0240053	0.03379
sp|O14972|DSCR3_HUMAN	DSCR3	DSCR3_HUMAN Down syndrome critical region protein 3	4	5.60805	6.07349	6.09071	6.45177	5.60286	5.47431	7.10312	7.43055	6.056	6.40271	1.05725	0.0803163	0.057106	0.157447
sp|Q5SRE5|NU188_HUMAN	NUP188	NU188_HUMAN Nucleoporin NUP188 homolog	15	6.08526	5.83396	6.54959	6.59233	6.41531	6.24855	7.01586	6.81481	6.26528	6.62363	1.0572	0.0802425	0.0587339	0.0533403
sp|Q8IWV7|UBR1_HUMAN	UBR1	UBR1_HUMAN E3 ubiquitin-protein ligase UBR1	24	5.88627	6.01252	6.59382	6.36192	6.28506	6.33601	6.78271	6.87226	6.21363	6.56901	1.05719	0.080239	0.0520785	0.0458837
sp|Q96LD4|TRI47_HUMAN	TRIM47	TRI47_HUMAN Tripartite motif-containing protein 47	16	5.57734	5.73337	6.19989	6.6374	6.15976	6.11811	6.65522	6.59601	6.037	6.38227	1.05719	0.080239	0.0794689	0.0442687
sp|Q9UEG4|ZN629_HUMAN	ZNF629	ZN629_HUMAN Zinc finger protein 629	4	6.00579	6.21258	5.16971	6.65333	6.15187	6.74061	6.35308	6.17077	6.01035	6.35408	1.05719	0.0802342	0.103504	0.0429944
sp|O75427|LRCH4_HUMAN	LRCH4	LRCH4_HUMAN Leucine-rich repeat and calponin homology domain-containing protein 4	5	5.8075	5.72268	6.4552	6.40344	6.43218	6.20645	6.57689	6.56729	6.0972	6.4457	1.05716	0.0801895	0.0632475	0.0267844
sp|P02786|TFR1_HUMAN	TFRC	TFR1_HUMAN Transferrin receptor protein 1	73	6.00646	6.04031	6.11124	6.10199	6.48478	6.27249	6.40974	6.47954	6.065	6.41164	1.05715	0.0801852	0.00826758	0.0154205
sp|Q658P3-2|STEA3_HUMAN	STEAP3	STEA3_HUMAN Isoform 2 of Metalloreductase STEAP3	2	6.03039	5.91565	6.40629	6.58208	6.63637	6.19618	6.81219	6.71465	6.2336	6.58985	1.05715	0.0801789	0.0501895	0.041294
sp|Q5THJ4|VP13D_HUMAN	VPS13D	VP13D_HUMAN Vacuolar protein sorting-associated protein 13D	7	5.63772	5.61891	6.34536	6.60425	6.16932	6.17224	6.76242	6.48522	6.05156	6.3973	1.05713	0.080156	0.0826362	0.0445495
sp|P35232|PHB_HUMAN	PHB	PHB_HUMAN Prohibitin	47	5.98207	5.88847	6.14701	6.36152	6.29604	6.13541	6.66965	6.67035	6.09477	6.44286	1.05711	0.0801306	0.0340425	0.0419611
sp|Q7Z3J2|CP062_HUMAN	C16orf62	CP062_HUMAN UPF0505 protein C16orf62	15	5.8796	5.7174	6.44014	6.57818	6.35273	6.27636	6.72392	6.66673	6.15383	6.50494	1.05705	0.0800501	0.0681546	0.0343228
sp|P52209|6PGD_HUMAN	PGD	6PGD_HUMAN 6-phosphogluconate dehydrogenase, decarboxylating	52	5.83449	5.82882	6.17316	6.272	6.21631	6.01308	6.60148	6.65295	6.02712	6.37096	1.05705	0.0800415	0.0380432	0.0483495
sp|Q14146|URB2_HUMAN	URB2	URB2_HUMAN Unhealthy ribosome biogenesis protein 2 homolog	7	5.76453	5.71117	6.56413	6.48963	6.24735	6.39757	6.9686	6.31455	6.13237	6.48202	1.05702	0.0799993	0.0745357	0.0509341
sp|Q6P597-3|KLC3_HUMAN	KLC3	KLC3_HUMAN Isoform 3 of Kinesin light chain 3	12	6.05943	6.11701	6.33453	6.62143	6.26536	6.24041	7.01148	7.04795	6.2831	6.6413	1.05701	0.0799891	0.0405488	0.067587
sp|Q96IR2|ZN845_HUMAN	ZNF845	ZN845_HUMAN Zinc finger protein 845	1	6.46335	4.81274	6.55714	7.19135	6.57921	6.78033	5.74114	7.3504	6.25615	6.61277	1.057	0.0799808	0.162264	0.100804
sp|Q5BJD5|TM41B_HUMAN	TMEM41B	TM41B_HUMAN Transmembrane protein 41B	1	5.61257	5.95302	6.98924	6.49473	6.25873	6.67685	6.69027	6.85126	6.26239	6.61928	1.05699	0.0799604	0.0967049	0.0382354
sp|Q9UDY8-2|MALT1_HUMAN	MALT1	MALT1_HUMAN Isoform 2 of Mucosa-associated lymphoid tissue lymphoma translocation protein 1	1	5.05775	5.60118	7.24934	7.9997	7.18791	6.63849	7.03057	6.52714	6.47699	6.84603	1.05698	0.079943	0.212749	0.0458592
tr|H7BXW7|H7BXW7_HUMAN	MPC1	H7BXW7_HUMAN Mitochondrial pyruvate carrier 1	1	5.75312	7.38107	7.1609	7.73793	8.58217	6.4746	6.35707	8.21527	7.00826	7.40728	1.05694	0.0798881	0.124122	0.156005
sp|O60333-4|KIF1B_HUMAN	KIF1B	KIF1B_HUMAN Isoform 4 of Kinesin-like protein KIF1B	34	5.74342	5.97446	6.05408	6.39622	6.13465	6.22705	6.57441	6.60769	6.04204	6.38595	1.05692	0.0798643	0.0447511	0.0376137
sp|Q9NPI0|TM138_HUMAN	TMEM138	TM138_HUMAN Transmembrane protein 138	1	5.62834	6.21798	4.99529	7.27749	5.98475	7.83694	6.04284	5.6266	6.02977	6.37278	1.05689	0.0798193	0.160892	0.155867
sp|Q5JTW2-2|CEP78_HUMAN	CEP78	CEP78_HUMAN Isoform 2 of Centrosomal protein of 78 kDa	4	5.70806	5.16876	6.11321	6.45213	6.68667	6.13569	6.45129	5.50201	5.86054	6.19392	1.05688	0.079818	0.0942675	0.0829105
sp|Q9NQY0|BIN3_HUMAN	BIN3	BIN3_HUMAN Bridging integrator 3	10	5.94141	5.92032	6.42922	6.50524	6.38209	6.18228	6.76134	6.88087	6.19905	6.55165	1.05688	0.0798106	0.050224	0.0496579
sp|Q9BTZ2|DHRS4_HUMAN	DHRS4	DHRS4_HUMAN Dehydrogenase/reductase SDR family member 4	5	5.86835	5.81785	6.01195	6.71787	5.75292	6.09392	6.91697	7.04078	6.104	6.45115	1.05687	0.0797997	0.0683849	0.0972086
sp|Q9Y281|COF2_HUMAN	CFL2	COF2_HUMAN Cofilin-2	14	5.88848	5.72053	6.10215	6.1266	6.07959	6.30782	6.33607	6.4699	5.95944	6.29834	1.05687	0.079796	0.032193	0.0257318
sp|P42575|CASP2_HUMAN	CASP2	CASP2_HUMAN Caspase-2	9	6.02118	6.14008	6.18303	6.7277	6.62264	6.61756	6.85106	6.4064	6.268	6.62441	1.05686	0.0797885	0.0500991	0.0274155
sp|O15228|GNPAT_HUMAN	GNPAT	GNPAT_HUMAN Dihydroxyacetone phosphate acyltransferase	19	6.18964	5.98189	6.51543	6.70321	6.55976	6.29556	7.00741	6.97113	6.34754	6.70846	1.05686	0.0797845	0.0509129	0.0509856
sp|Q9H825|METL8_HUMAN	METTL8	METL8_HUMAN Methyltransferase-like protein 8	3	5.86646	6.03703	6.63116	6.50274	6.50873	6.34933	6.80933	6.7934	6.25935	6.6152	1.05685	0.079772	0.058429	0.0339666
sp|Q86UL3|GPAT4_HUMAN	AGPAT6	GPAT4_HUMAN Glycerol-3-phosphate acyltransferase 4	4	5.17923	5.87768	6.86632	6.36179	6.19618	6.06407	6.79458	6.61038	6.07125	6.4163	1.05683	0.0797474	0.118382	0.0534829
sp|Q8TDX7|NEK7_HUMAN	NEK7	NEK7_HUMAN Serine/threonine-protein kinase Nek7	6	5.9766	5.51073	6.43993	6.37444	6.42357	6.59335	6.20589	6.45606	6.07543	6.41972	1.05667	0.0795245	0.0705354	0.024989
sp|Q9NRW7|VPS45_HUMAN	VPS45	VPS45_HUMAN Vacuolar protein sorting-associated protein 45	15	5.83956	5.71848	6.23135	6.50249	6.43556	6.11731	6.57421	6.54115	6.07297	6.41706	1.05666	0.0795097	0.0593488	0.0324753
sp|Q969Z3|MOSC2_HUMAN	MTARC2	MOSC2_HUMAN MOSC domain-containing protein 2, mitochondrial	6	5.79304	5.61889	6.17846	6.19043	6.48547	6.1157	6.27769	6.24927	5.94521	6.28203	1.05666	0.0795048	0.0479873	0.024341
sp|Q8IYB5|SMAP1_HUMAN	SMAP1	SMAP1_HUMAN Stromal membrane-associated protein 1	2	6.14774	6.73369	5.22483	6.10435	6.30349	6.73197	6.23683	6.30987	6.05265	6.39554	1.05665	0.0794987	0.102772	0.0354475
sp|Q9Y5X1|SNX9_HUMAN	SNX9	SNX9_HUMAN Sorting nexin-9	10	5.56299	5.83356	6.36451	6.3385	6.30634	6.05635	6.5857	6.51632	6.02489	6.36618	1.05665	0.0794925	0.0652509	0.0374262
sp|O75462|CRLF1_HUMAN	CRLF1	CRLF1_HUMAN Cytokine receptor-like factor 1	2	5.95161	6.77581	5.7163	6.12867	6.43495	6.38781	6.64364	6.49591	6.1431	6.49058	1.05656	0.0793806	0.0739643	0.0171362
tr|I3L2B0|I3L2B0_HUMAN	CLUH	I3L2B0_HUMAN Clustered mitochondria protein homolog	5	6.00682	5.75181	6.34464	6.46838	5.65079	6.47435	7.20173	6.63444	6.14291	6.49033	1.05656	0.0793684	0.0530091	0.0987342
sp|O75381|PEX14_HUMAN	PEX14	PEX14_HUMAN Peroxisomal membrane protein PEX14	8	6.39572	6.35206	6.00086	5.84541	6.225	6.73624	6.39852	6.62427	6.14851	6.49601	1.05652	0.0793159	0.0436629	0.0352288
sp|Q96RF0-2|SNX18_HUMAN	SNX18	SNX18_HUMAN Isoform 2 of Sorting nexin-18	6	5.52006	5.70268	6.03025	6.64874	6.17836	5.93613	6.48531	6.65252	5.97543	6.31308	1.05651	0.0793009	0.0830098	0.0505168
sp|Q9NTJ3|SMC4_HUMAN	SMC4	SMC4_HUMAN Structural maintenance of chromosomes protein 4	50	5.93528	5.98555	6.38471	6.34144	6.34225	6.3697	6.7723	6.55536	6.16174	6.5099	1.0565	0.079297	0.037984	0.0305534
sp|Q9UKL6|PPCT_HUMAN	PCTP	PPCT_HUMAN Phosphatidylcholine transfer protein	1	6.18903	5.70059	4.35484	7.89382	6.18996	5.95919	6.57754	6.77545	6.03457	6.37554	1.0565	0.0792954	0.242297	0.0578801
sp|Q14CX7|NAA25_HUMAN	NAA25	NAA25_HUMAN N-alpha-acetyltransferase 25, NatB auxiliary subunit	46	5.68594	5.84482	6.04308	6.40826	6.07962	6.10159	6.51374	6.64189	5.99553	6.33421	1.05649	0.0792786	0.0519616	0.0451919
sp|Q9NVR2|INT10_HUMAN	INTS10	INT10_HUMAN Integrator complex subunit 10	13	6.151	6.04995	6.48315	6.63055	6.58942	6.56595	6.71193	6.87717	6.32866	6.68612	1.05648	0.0792681	0.0432007	0.0213197
sp|Q9Y314|NOSIP_HUMAN	NOSIP	NOSIP_HUMAN Nitric oxide synthase-interacting protein	25	6.21905	6.13781	6.32423	6.62663	6.43608	6.31638	7.05273	6.93169	6.32693	6.68422	1.05647	0.0792536	0.0338044	0.0542117
sp|Q4KMQ1|TPRN_HUMAN	TPRN	TPRN_HUMAN Taperin	1	5.62989	5.77933	7.16796	6.60821	6.49969	6.29005	7.55785	6.25978	6.29635	6.65184	1.05646	0.0792388	0.114838	0.092208
sp|Q27J81|INF2_HUMAN	INF2	INF2_HUMAN Inverted formin-2	23	6.04171	5.86001	6.53587	6.3302	6.4403	6.29398	6.67407	6.75729	6.19195	6.54141	1.05644	0.0792084	0.0484635	0.0325068
sp|Q9HAU5|RENT2_HUMAN	UPF2	RENT2_HUMAN Regulator of nonsense transcripts 2	24	6.09023	5.82179	6.35197	6.57531	6.80011	6.46718	6.46382	6.50931	6.20983	6.56011	1.05641	0.0791663	0.0524835	0.0245936
sp|Q9NXN4|GDAP2_HUMAN	GDAP2	GDAP2_HUMAN Ganglioside-induced differentiation-associated protein 2	5	5.85431	5.65394	6.27404	6.60992	6.47509	6.20834	6.57402	6.5101	6.09805	6.44189	1.05638	0.0791349	0.0701911	0.024992
sp|Q8TBP5|F174A_HUMAN	FAM174A	F174A_HUMAN Membrane protein FAM174A	1	5.32027	5.31513	9.01121	5.7376	8.31609	7.30379	6.67237	4.5222	6.34605	6.70361	1.05634	0.0790793	0.281713	0.239295
sp|O95455|TGDS_HUMAN	TGDS	TGDS_HUMAN dTDP-D-glucose 4,6-dehydratase	1	5.76034	4.80297	6.50868	7.29086	6.1028	6.5938	6.20727	6.83137	6.09071	6.43381	1.05633	0.0790623	0.174337	0.0526733
sp|Q8WTW3|COG1_HUMAN	COG1	COG1_HUMAN Conserved oligomeric Golgi complex subunit 1	17	5.86927	5.73425	6.48967	6.64221	6.26774	6.13727	7.10153	6.62157	6.18385	6.53203	1.0563	0.0790255	0.0726035	0.0660269
sp|P62244|RS15A_HUMAN	RPS15A	RS15A_HUMAN 40S ribosomal protein S15a	31	6.8997	6.54403	5.66177	5.45534	7.06164	6.99601	5.97745	5.90818	6.14021	6.48582	1.05629	0.079001	0.112749	0.0968601
sp|P49795|RGS19_HUMAN	RGS19	RGS19_HUMAN Regulator of G-protein signaling 19	3	5.41368	5.591	6.03363	7.10224	6.34731	7.02136	5.81016	6.31768	6.03514	6.37413	1.05617	0.0788412	0.125543	0.0779634
sp|Q8NEZ5|FBX22_HUMAN	FBXO22	FBX22_HUMAN F-box only protein 22	17	6.00962	6.26303	6.10616	6.45053	6.20406	6.32558	6.77484	6.91872	6.20733	6.5558	1.05614	0.0787978	0.0310681	0.0525763
sp|Q96DC8|ECHD3_HUMAN	ECHDC3	ECHD3_HUMAN Enoyl-CoA hydratase domain-containing protein 3, mitochondrial	2	5.79823	5.13481	6.93932	5.45282	6.46906	5.57434	6.15729	6.43173	5.83129	6.15811	1.05604	0.0786702	0.134927	0.0671079
sp|P16615|AT2A2_HUMAN	ATP2A2	AT2A2_HUMAN Sarcoplasmic/endoplasmic reticulum calcium ATPase 2	52	6.23745	6.02705	6.5037	6.61331	6.61144	6.31948	7.02414	6.84883	6.34538	6.70097	1.05604	0.0786645	0.0416793	0.0455791
sp|Q15797|SMAD1_HUMAN	SMAD1	SMAD1_HUMAN Mothers against decapentaplegic homolog 1	6	6.01184	6.13616	6.35964	6.49725	6.4286	6.43279	6.73288	6.81151	6.25122	6.60145	1.05602	0.0786435	0.0349044	0.0302613
sp|Q9HD33|RM47_HUMAN	MRPL47	RM47_HUMAN 39S ribosomal protein L47, mitochondrial	12	5.66839	5.41067	6.69622	6.41258	6.01065	6.14831	6.81248	6.57111	6.04697	6.38564	1.05601	0.0786194	0.100292	0.0581421
sp|Q8NEL9|DDHD1_HUMAN	DDHD1	DDHD1_HUMAN Phospholipase DDHD1	16	6.11562	5.96915	6.0369	6.0964	6.28095	6.53004	6.30848	6.45488	6.05452	6.39359	1.056	0.0786137	0.0109083	0.0185737
sp|Q15035|TRAM2_HUMAN	TRAM2	TRAM2_HUMAN Translocating chain-associated membrane protein 2	3	6.26216	5.89333	6.44806	6.60015	6.38455	6.46968	6.90217	6.85733	6.30092	6.65343	1.05595	0.0785352	0.0483835	0.0397185
sp|O43318|M3K7_HUMAN	MAP3K7	M3K7_HUMAN Mitogen-activated protein kinase kinase kinase 7	13	5.91866	5.99451	6.18873	6.41499	6.31923	6.4713	6.62361	6.47431	6.12922	6.47211	1.05594	0.0785326	0.0361999	0.019201
sp|Q4G0F5|VP26B_HUMAN	VPS26B	VP26B_HUMAN Vacuolar protein sorting-associated protein 26B	10	5.73989	5.92353	6.56436	6.57532	6.1596	6.59289	6.64114	6.79703	6.20078	6.54767	1.05594	0.078532	0.0697859	0.0416918
sp|Q9H2D1|MFTC_HUMAN	SLC25A32	MFTC_HUMAN Mitochondrial folate transporter/carrier	7	5.93793	5.42752	6.76732	6.61536	6.09345	6.26583	6.72897	7.04436	6.18703	6.53315	1.05594	0.0785317	0.100466	0.0663957
sp|Q8N163|CCAR2_HUMAN	CCAR2	CCAR2_HUMAN Cell cycle and apoptosis regulator protein 2	44	6.01711	5.80153	6.12372	6.348	6.11081	6.17211	6.69836	6.66693	6.07259	6.41205	1.0559	0.0784743	0.037433	0.0489261
sp|Q9H7Z3|NRDE2_HUMAN	NRDE2	NRDE2_HUMAN Protein NRDE2 homolog	2	5.92259	5.99148	6.69705	6.01728	6.88758	5.82852	6.84875	6.44001	6.1571	6.50122	1.05589	0.0784584	0.058823	0.075685
sp|Q9Y6I4|UBP3_HUMAN	USP3	UBP3_HUMAN Ubiquitin carboxyl-terminal hydrolase 3	11	6.16141	5.47827	6.27621	6.37596	6.08351	6.59464	6.48446	6.48638	6.07296	6.41225	1.05587	0.0784297	0.0668599	0.0351088
sp|Q6P9B6|TLDC1_HUMAN	TLDC1	TLDC1_HUMAN TLD domain-containing protein 1	7	6.04726	6.17263	6.31857	6.45573	6.18263	6.42876	6.93349	6.84552	6.24855	6.5976	1.05586	0.0784204	0.0283448	0.0535877
sp|Q9BQK8-2|LPIN3_HUMAN	LPIN3	LPIN3_HUMAN Isoform 2 of Phosphatidate phosphatase LPIN3	5	5.87736	6.02143	6.43849	6.22003	6.35177	6.36667	6.57872	6.63191	6.13933	6.48227	1.05586	0.0784179	0.039736	0.0221931
sp|Q99959|PKP2_HUMAN	PKP2	PKP2_HUMAN Plakophilin-2	2	5.99723	5.95817	6.13854	6.12435	6.7208	6.35168	6.15804	6.34043	6.05457	6.39274	1.05585	0.0784088	0.0149262	0.0369215
sp|P48506|GSH1_HUMAN	GCLC	GSH1_HUMAN Glutamate--cysteine ligase catalytic subunit	32	5.76202	5.74999	6.08002	6.50866	6.14529	5.77878	6.68524	6.83728	6.02517	6.36165	1.05584	0.0783979	0.0592046	0.0768733
sp|Q9UNL2|SSRG_HUMAN	SSR3	SSRG_HUMAN Translocon-associated protein subunit gamma	2	5.99674	7.22757	5.80131	6.0093	6.77527	5.82157	6.91802	6.91674	6.25873	6.6079	1.05579	0.0783219	0.104314	0.0799775
sp|Q5BJF2|TMM97_HUMAN	TMEM97	TMM97_HUMAN Transmembrane protein 97	3	6.15119	5.92871	6.60913	7.10315	6.72002	6.52222	7.31725	6.67089	6.44804	6.80759	1.05576	0.0782834	0.0807312	0.0514163
sp|Q7L5Y1-4|ENOF1_HUMAN	ENOSF1	ENOF1_HUMAN Isoform 4 of Mitochondrial enolase superfamily member 1	16	5.97451	5.59672	6.13764	6.47008	6.02477	6.20757	6.62331	6.67151	6.04474	6.38179	1.05576	0.0782814	0.060044	0.0495586
sp|Q04917|1433F_HUMAN	YWHAH	1433F_HUMAN 14-3-3 protein eta	22	6.02292	6.09602	5.83442	5.91789	6.18415	6.1072	6.36253	6.54706	5.96781	6.30024	1.0557	0.0782034	0.0192906	0.0311495
sp|P01116-2|RASK_HUMAN	KRAS	RASK_HUMAN Isoform 2B of GTPase KRas	1	5.56401	5.86026	5.10116	5.87382	5.37488	6.58116	6.40058	5.29011	5.59981	5.91168	1.05569	0.0781903	0.0646218	0.113966
sp|Q15003|CND2_HUMAN	NCAPH	CND2_HUMAN Condensin complex subunit 2	17	6.37975	6.27625	6.63399	6.48821	6.66094	6.53371	7.09686	6.92099	6.44455	6.80312	1.05564	0.078118	0.0237563	0.0372803
sp|P56282|DPOE2_HUMAN	POLE2	DPOE2_HUMAN DNA polymerase epsilon subunit 2	7	5.93389	5.60773	5.96163	6.21108	6.06602	5.76162	6.47204	6.73398	5.92858	6.25841	1.05563	0.0781101	0.0417586	0.0687644
sp|Q5TCX8|M3KL4_HUMAN	MLK4	M3KL4_HUMAN Mitogen-activated protein kinase kinase kinase MLK4	1	6.25363	5.54699	6.41541	6.7577	6.73727	7.00881	6.16127	6.45566	6.24343	6.59075	1.05563	0.0781038	0.0816274	0.05533
sp|P69905|HBA_HUMAN	HBA1	HBA_HUMAN Hemoglobin subunit alpha	20	4.17964	5.50395	3.82167	4.0898	3.483	4.43139	5.81154	4.84696	4.39877	4.64322	1.05557	0.0780279	0.171029	0.207971
sp|Q63ZY3|KANK2_HUMAN	KANK2	KANK2_HUMAN KN motif and ankyrin repeat domain-containing protein 2	10	6.04416	6.03528	6.39451	6.42279	6.30545	6.36762	7.03151	6.57542	6.22419	6.57	1.05556	0.0780084	0.0342768	0.0500176
sp|Q9H6H4|REEP4_HUMAN	REEP4	REEP4_HUMAN Receptor expression-enhancing protein 4	3	5.26882	5.82578	6.01037	6.43028	6.7651	6.16815	5.66239	6.24709	5.88381	6.21068	1.05555	0.0780005	0.0818759	0.0726724
sp|Q01970|PLCB3_HUMAN	PLCB3	PLCB3_HUMAN 1-phosphatidylinositol 4,5-bisphosphate phosphodiesterase beta-3	38	5.73277	5.43772	6.30903	6.63274	6.00881	5.89916	6.8185	6.72483	6.02806	6.36282	1.05553	0.0779725	0.0898611	0.0747694
sp|Q96CW1|AP2M1_HUMAN	AP2M1	AP2M1_HUMAN AP-2 complex subunit mu	31	6.12302	5.84741	6.04966	6.42457	6.35211	6.29536	6.62585	6.52863	6.11116	6.45049	1.05553	0.0779608	0.0391486	0.0237822
sp|Q13009|TIAM1_HUMAN	TIAM1	TIAM1_HUMAN T-lymphoma invasion and metastasis-inducing protein 1	3	5.88386	6.39172	6.01697	6.14839	5.99138	6.56535	6.58353	6.65712	6.11024	6.44934	1.0555	0.0779248	0.0354345	0.0477378
sp|Q9UBM7|DHCR7_HUMAN	DHCR7	DHCR7_HUMAN 7-dehydrocholesterol reductase	10	6.12684	6.13215	6.52281	6.30048	6.47355	6.50955	6.80202	6.68917	6.27057	6.61857	1.0555	0.0779235	0.0297409	0.0233342
sp|Q15334|L2GL1_HUMAN	LLGL1	L2GL1_HUMAN Lethal(2) giant larvae protein homolog 1	13	5.98822	5.80888	6.47115	6.33754	6.42585	6.36573	6.51973	6.65974	6.15145	6.49276	1.05549	0.0779065	0.049738	0.0197285
sp|P07900-2|HS90A_HUMAN	HSP90AA1	HS90A_HUMAN Isoform 2 of Heat shock protein HSP 90-alpha	305	5.81422	5.81036	6.05491	6.23489	6.09213	6.12595	6.49849	6.52454	5.9786	6.31028	1.05548	0.077897	0.034392	0.0369273
sp|Q9NX08|COMD8_HUMAN	COMMD8	COMD8_HUMAN COMM domain-containing protein 8	8	5.96487	5.9812	5.93041	6.06848	6.0797	6.09152	6.47885	6.62324	5.98624	6.31833	1.05548	0.0778926	0.00981787	0.043548
sp|P08047|SP1_HUMAN	SP1	SP1_HUMAN Transcription factor Sp1	4	6.71534	6.7288	6.46616	6.50125	6.71279	7.08839	7.15281	6.92231	6.60289	6.96908	1.05546	0.0778701	0.0209715	0.0281993
sp|Q9NVM1|EVA1B_HUMAN	EVA1B	EVA1B_HUMAN Protein eva-1 homolog B	3	5.92769	6.77824	5.88976	5.79984	6.53967	6.34198	6.70989	6.15594	6.09888	6.43687	1.05542	0.0778144	0.0747788	0.0373104
sp|O95479|G6PE_HUMAN	H6PD	G6PE_HUMAN GDH/6PGL endoplasmic bifunctional protein	3	5.64676	5.39022	6.01612	6.76951	5.75016	5.34718	7.14907	6.89593	5.95565	6.28558	1.0554	0.0777874	0.100798	0.13886
sp|O60830-2|TI17B_HUMAN	TIMM17B	TI17B_HUMAN Isoform 2 of Mitochondrial import inner membrane translocase subunit Tim17-B	2	5.44258	5.14552	6.44426	7.65743	5.76498	5.95736	7.21194	7.12219	6.17245	6.51412	1.05535	0.0777271	0.183921	0.116504
tr|K7ES63|K7ES63_HUMAN	TUBB6	K7ES63_HUMAN Tubulin beta-6 chain (Fragment)	1	6.07455	5.27884	6.89002	6.76411	7.16057	5.60365	6.45328	7.17383	6.25188	6.59783	1.05534	0.0777021	0.118546	0.112667
sp|Q13263|TIF1B_HUMAN	TRIM28	TIF1B_HUMAN Transcription intermediary factor 1-beta	105	5.92541	5.99221	6.09383	6.32645	6.17703	6.26611	6.599	6.6413	6.08448	6.42086	1.05529	0.0776338	0.0288522	0.0363838
sp|P13051|UNG_HUMAN	UNG	UNG_HUMAN Uracil-DNA glycosylase	9	5.70083	5.62342	5.70748	6.32929	5.85189	5.94471	6.30005	6.55516	5.84025	6.16295	1.05525	0.0775903	0.0562045	0.0527459
sp|P54920|SNAA_HUMAN	NAPA	SNAA_HUMAN Alpha-soluble NSF attachment protein	14	5.94745	5.93043	5.99172	6.57629	6.10452	6.36316	6.5763	6.7526	6.11147	6.44914	1.05525	0.0775879	0.0508802	0.0433439
sp|Q9UJJ9|GNPTG_HUMAN	GNPTG	GNPTG_HUMAN N-acetylglucosamine-1-phosphotransferase subunit gamma	2	5.76286	6.90598	5.98525	5.8068	6.44133	6.6184	6.24718	6.50509	6.11522	6.453	1.05524	0.077565	0.0876291	0.0241019
sp|Q8NBU5|ATAD1_HUMAN	ATAD1	ATAD1_HUMAN ATPase family AAA domain-containing protein 1	11	6.02734	5.84101	6.50257	6.5385	6.29159	6.21372	6.92961	6.85015	6.22735	6.57127	1.05523	0.0775521	0.0557678	0.0564115
sp|Q9NVS2-2|RT18A_HUMAN	MRPS18A	RT18A_HUMAN Isoform 2 of 28S ribosomal protein S18a, mitochondrial	6	5.48081	5.88881	6.4028	6.90842	5.84104	6.04624	6.94172	7.21482	6.17021	6.51096	1.05522	0.0775496	0.100496	0.102866
sp|Q9Y4F1-2|FARP1_HUMAN	FARP1	FARP1_HUMAN Isoform 2 of FERM, RhoGEF and pleckstrin domain-containing protein 1	7	5.77765	6.5048	6.31582	6.10825	6.44341	6.20598	6.65133	6.76931	6.17663	6.51751	1.05519	0.0775004	0.0504176	0.0379833
sp|Q9UKB1|FBW1B_HUMAN	FBXW11	FBW1B_HUMAN F-box/WD repeat-containing protein 11	2	5.82946	6.08551	6.61891	6.43911	5.62809	6.40259	7.17912	7.14139	6.24325	6.5878	1.05519	0.0774995	0.0566739	0.111253
sp|Q12982-2|BNIP2_HUMAN	BNIP2	BNIP2_HUMAN Isoform 2 of BCL2/adenovirus E1B 19 kDa protein-interacting protein 2	5	5.81524	6.11374	6.21523	6.21407	6.20077	6.13858	6.75204	6.61103	6.08957	6.42561	1.05518	0.0774919	0.0310322	0.0470222
sp|Q71F56|MD13L_HUMAN	MED13L	MD13L_HUMAN Mediator of RNA polymerase II transcription subunit 13-like	8	5.91702	6.26	6.81462	6.43799	6.71145	6.81733	6.57685	6.72578	6.35741	6.70785	1.05512	0.0774124	0.0587826	0.0147785
sp|Q9BQP7|MGME1_HUMAN	MGME1	MGME1_HUMAN Mitochondrial genome maintenance exonuclease 1	16	5.74963	5.72006	5.95783	6.14713	6.21962	6.17703	6.23154	6.24595	5.89366	6.21854	1.05512	0.0774103	0.033828	0.0047745
sp|Q5T4S7-2|UBR4_HUMAN	UBR4	UBR4_HUMAN Isoform 2 of E3 ubiquitin-protein ligase UBR4	91	6.03627	5.69024	6.40267	6.63387	6.25885	6.22	6.9059	6.74279	6.19076	6.53188	1.0551	0.0773823	0.0669682	0.0527522
sp|Q7L0Y3|MRRP1_HUMAN	TRMT10C	MRRP1_HUMAN Mitochondrial ribonuclease P protein 1	28	5.93038	5.71303	6.25096	6.41851	6.34318	6.23298	6.50243	6.5737	6.07822	6.41307	1.05509	0.0773668	0.0521006	0.0240061
sp|Q9NVR5|KTU_HUMAN	DNAAF2	KTU_HUMAN Protein kintoun	6	5.64994	5.8237	6.40093	6.14976	6.25771	6.19855	6.35179	6.53838	6.00608	6.33661	1.05503	0.0772864	0.0557746	0.0234478
sp|Q9Y678|COPG1_HUMAN	COPG1	COPG1_HUMAN Coatomer subunit gamma-1	42	6.17865	5.9607	6.27422	6.36082	6.47487	6.30105	6.73063	6.63091	6.1936	6.53436	1.05502	0.0772694	0.0277981	0.0287417
sp|Q05397-5|FAK1_HUMAN	PTK2	FAK1_HUMAN Isoform 5 of Focal adhesion kinase 1	32	5.9981	5.89606	6.25096	6.37474	6.39405	6.25246	6.62341	6.59874	6.12996	6.46716	1.05501	0.0772546	0.0360686	0.0272496
sp|P14625|ENPL_HUMAN	HSP90B1	ENPL_HUMAN Endoplasmin	175	5.8415	5.84857	6.09514	6.24017	6.24601	6.06506	6.47675	6.55871	6.00634	6.33663	1.05499	0.077229	0.0325439	0.0353955
sp|Q8N9U0|TAC2N_HUMAN	TC2N	TAC2N_HUMAN Tandem C2 domains nuclear protein	1	6.05423	5.4514	6.24591	7.19728	7.27169	5.85111	7.54874	5.64909	6.2372	6.58016	1.05498	0.0772224	0.116087	0.147206
sp|Q8IU85|KCC1D_HUMAN	CAMK1D	KCC1D_HUMAN Calcium/calmodulin-dependent protein kinase type 1D	8	5.78275	6.6847	5.89926	6.22673	6.21141	6.49085	6.83361	6.40955	6.14836	6.48635	1.05497	0.0772063	0.0657003	0.0400149
sp|O15305|PMM2_HUMAN	PMM2	PMM2_HUMAN Phosphomannomutase 2	14	6.04061	6.12587	5.89262	6.08619	6.40078	6.07773	6.38484	6.60914	6.03632	6.36812	1.05497	0.0771982	0.0168875	0.0343757
sp|Q15738|NSDHL_HUMAN	NSDHL	NSDHL_HUMAN Sterol-4-alpha-carboxylate 3-dehydrogenase, decarboxylating	17	6.02897	5.78121	6.33864	6.41288	6.19132	6.26268	6.79195	6.66292	6.14043	6.47722	1.05485	0.0770357	0.047478	0.0455644
sp|Q8IWE5|PKHM2_HUMAN	PLEKHM2	PKHM2_HUMAN Pleckstrin homology domain-containing family M member 2	7	5.65009	5.89552	6.3402	6.34831	6.07985	6.34913	6.45816	6.67601	6.05853	6.39079	1.05484	0.0770259	0.0569151	0.0387844
sp|Q92624|APBP2_HUMAN	APPBP2	APBP2_HUMAN Amyloid protein-binding protein 2	4	5.43213	5.66865	6.05586	7.00104	5.99646	6.52955	6.61607	6.33962	6.03942	6.37043	1.05481	0.0769796	0.114367	0.0431288
sp|Q03154|ACY1_HUMAN	ACY1	ACY1_HUMAN Aminoacylase-1	15	6.04634	6.07371	6.03135	6.09874	5.99879	6.94344	6.2676	6.36912	6.06253	6.39474	1.0548	0.076964	0.00492129	0.0622031
sp|Q9NPB8|GPCP1_HUMAN	GPCPD1	GPCP1_HUMAN Glycerophosphocholine phosphodiesterase GPCPD1	5	5.87516	5.95441	6.00913	6.73226	6.32614	5.97803	6.70096	6.91062	6.14274	6.47894	1.05473	0.0768749	0.0646036	0.0636323
sp|Q8NFZ0-2|FBX18_HUMAN	FBXO18	FBX18_HUMAN Isoform 2 of F-box only protein 18	4	5.64242	5.95939	6.67702	6.45877	6.33189	6.30479	6.75322	6.7015	6.1844	6.52285	1.05473	0.0768688	0.0759762	0.0363871
sp|Q6PIU2|NCEH1_HUMAN	NCEH1	NCEH1_HUMAN Neutral cholesterol ester hydrolase 1	16	5.83173	6.10403	6.28243	6.44826	6.01967	6.23409	6.89904	6.8635	6.16661	6.50408	1.05472	0.0768657	0.0427819	0.0683408
sp|Q8IWW6-3|RHG12_HUMAN	ARHGAP12	RHG12_HUMAN Isoform 3 of Rho GTPase-activating protein 12	28	5.86458	5.83555	6.09326	6.31986	6.28536	6.15732	6.56494	6.42489	6.02831	6.35813	1.05471	0.0768477	0.0374844	0.0276691
sp|P68363|TBA1B_HUMAN	TUBA1B	TBA1B_HUMAN Tubulin alpha-1B chain	146	6.04287	5.93988	6.34022	6.34548	6.52263	6.18231	6.71002	6.60244	6.16711	6.50435	1.05468	0.0768097	0.0336049	0.035055
sp|Q9C0B9|ZCHC2_HUMAN	ZCCHC2	ZCHC2_HUMAN Zinc finger CCHC domain-containing protein 2	3	6.25923	5.97952	5.94312	7.07402	6.34011	6.79268	6.99631	6.5073	6.31397	6.6591	1.05466	0.0767792	0.0833089	0.0438977
sp|Q13546|RIPK1_HUMAN	RIPK1	RIPK1_HUMAN Receptor-interacting serine/threonine-protein kinase 1	19	6.21175	5.9718	6.18154	6.54923	6.36428	6.29586	6.79136	6.82437	6.22858	6.56897	1.05465	0.0767633	0.0383587	0.0422582
sp|O75448|MED24_HUMAN	MED24	MED24_HUMAN Mediator of RNA polymerase II transcription subunit 24	18	5.70619	5.84872	6.39349	6.81708	6.49515	6.29552	6.57691	6.7512	6.19137	6.52969	1.05464	0.0767569	0.0826296	0.0289666
sp|P43250-2|GRK6_HUMAN	GRK6	GRK6_HUMAN Isoform GRK6B of G protein-coupled receptor kinase 6	5	5.90019	5.91583	6.53566	6.44371	6.10292	6.46844	6.68976	6.88918	6.19885	6.53757	1.05464	0.0767556	0.0545234	0.0515318
sp|Q14571|ITPR2_HUMAN	ITPR2	ITPR2_HUMAN Inositol 1,4,5-trisphosphate receptor type 2	6	5.97717	5.71711	7.16826	6.75595	7.08021	6.41976	6.91136	6.60666	6.40462	6.7545	1.05463	0.0767349	0.105203	0.0439684
sp|Q9Y3I0|RTCB_HUMAN	RTCB	RTCB_HUMAN tRNA-splicing ligase RtcB homolog	24	5.96116	5.93432	6.19977	6.23484	6.2632	6.32709	6.41357	6.65496	6.08252	6.4147	1.05461	0.0767132	0.0257581	0.0267532
sp|Q86U42|PABP2_HUMAN	PABPN1	PABP2_HUMAN Polyadenylate-binding protein 2	1	6.24516	5.53281	7.47268	5.31564	5.84431	7.14161	6.67816	6.24346	6.14157	6.47688	1.0546	0.076692	0.158293	0.086287
sp|Q96AC1-3|FERM2_HUMAN	FERMT2	FERM2_HUMAN Isoform 3 of Fermitin family homolog 2	21	6.09048	5.58159	6.23383	6.22261	6.17101	6.03083	6.76338	6.47958	6.03213	6.3612	1.05455	0.076632	0.050949	0.0514288
sp|Q07352|TISB_HUMAN	ZFP36L1	TISB_HUMAN Zinc finger protein 36, C3H1 type-like 1	2	6.29572	7.12386	6.6979	6.98049	7.50891	6.7755	7.88464	6.40667	6.77449	7.14393	1.05453	0.0766051	0.0538723	0.0942879
sp|Q9NQT5|EXOS3_HUMAN	EXOSC3	EXOS3_HUMAN Exosome complex component RRP40	11	6.06594	6.02046	6.36103	6.32796	6.38276	6.22299	6.80693	6.71322	6.19385	6.53148	1.05451	0.076573	0.0283283	0.0420398
sp|Q14008|CKAP5_HUMAN	CKAP5	CKAP5_HUMAN Cytoskeleton-associated protein 5	75	6.11867	5.75681	6.30942	6.31561	6.54008	6.31239	6.62448	6.3573	6.12513	6.45856	1.05444	0.0764732	0.0427762	0.0229296
sp|Q16822|PCKGM_HUMAN	PCK2	PCKGM_HUMAN Phosphoenolpyruvate carboxykinase [GTP], mitochondrial	25	5.93562	5.54276	6.42046	6.88647	6.25991	6.18707	7.00502	6.68254	6.19633	6.53363	1.05444	0.0764725	0.0941795	0.0585759
sp|P21579|SYT1_HUMAN	SYT1	SYT1_HUMAN Synaptotagmin-1	16	6.04334	5.85939	6.08489	6.04055	6.29438	6.14147	6.39928	6.50086	6.00704	6.334	1.05443	0.0764614	0.0167306	0.0242436
sp|P31749|AKT1_HUMAN	AKT1	AKT1_HUMAN RAC-alpha serine/threonine-protein kinase	8	5.93084	5.48902	6.29323	6.34253	6.07138	6.03671	6.67608	6.58015	6.01391	6.34108	1.0544	0.0764265	0.0657054	0.0526795
sp|P19174-2|PLCG1_HUMAN	PLCG1	PLCG1_HUMAN Isoform 2 of 1-phosphatidylinositol 4,5-bisphosphate phosphodiesterase gamma-1	19	5.99593	5.59126	6.53329	6.60772	6.20242	6.25574	6.96268	6.65265	6.18205	6.51837	1.0544	0.0764265	0.0774776	0.0549038
sp|Q9BRQ8|AIFM2_HUMAN	AIFM2	AIFM2_HUMAN Apoptosis-inducing factor 2	13	6.08243	6.04421	6.34474	6.17177	6.29383	6.27817	6.75808	6.65315	6.16079	6.49581	1.05438	0.0763941	0.0217144	0.0378869
sp|Q96S52|PIGS_HUMAN	PIGS	PIGS_HUMAN GPI transamidase component PIG-S	15	5.73901	5.76709	6.03054	6.57797	5.94917	6.15968	6.65278	6.66425	6.02865	6.35647	1.05438	0.0763902	0.0645322	0.0565147
sp|Q9NPI1-2|BRD7_HUMAN	BRD7	BRD7_HUMAN Isoform 2 of Bromodomain-containing protein 7	4	5.9901	5.94133	6.2014	6.2481	6.33773	6.27977	6.63934	6.44973	6.09523	6.42664	1.05437	0.076384	0.0249495	0.0246439
sp|O94876|TMCC1_HUMAN	TMCC1	TMCC1_HUMAN Transmembrane and coiled-coil domains protein 1	1	4.72394	5.22165	6.65691	7.66659	6.59205	6.9715	5.47497	6.54922	6.06727	6.39693	1.05433	0.0763327	0.221641	0.10056
sp|Q96SQ9-2|CP2S1_HUMAN	CYP2S1	CP2S1_HUMAN Isoform 2 of Cytochrome P450 2S1	7	5.98276	5.4886	6.27404	6.41073	5.89391	6.39287	6.57843	6.6021	6.03903	6.36683	1.05428	0.0762572	0.0675698	0.051653
sp|Q9BPX3|CND3_HUMAN	NCAPG	CND3_HUMAN Condensin complex subunit 3	17	5.84968	6.09892	6.31876	6.26699	6.50334	6.4455	6.39463	6.52233	6.13359	6.46645	1.05427	0.0762428	0.0344429	0.00896424
sp|Q5T2T1|MPP7_HUMAN	MPP7	MPP7_HUMAN MAGUK p55 subfamily member 7	19	6.15868	5.4052	6.43672	6.50311	6.17968	6.24399	6.83001	6.57858	6.12593	6.45807	1.05422	0.0761737	0.0821291	0.0469833
sp|P50851-2|LRBA_HUMAN	LRBA	LRBA_HUMAN Isoform 2 of Lipopolysaccharide-responsive and beige-like anchor protein	1	5.46988	6.00046	5.74106	7.61131	6.02412	6.53036	5.80941	7.80436	6.20568	6.54206	1.05421	0.0761568	0.154987	0.136679
sp|Q9UKD1|GMEB2_HUMAN	GMEB2	GMEB2_HUMAN Glucocorticoid modulatory element-binding protein 2	3	6.00665	5.95795	6.05895	6.10112	6.06181	6.29527	6.57978	6.49486	6.03117	6.35793	1.05418	0.0761198	0.0103222	0.0362755
sp|Q13085-4|ACACA_HUMAN	ACACA	ACACA_HUMAN Isoform 4 of Acetyl-CoA carboxylase 1	65	5.92041	5.80445	6.48191	6.4412	6.28316	6.17011	6.83763	6.69238	6.16199	6.49582	1.05418	0.0761147	0.0567227	0.0492289
sp|Q9C0B7|TNG6_HUMAN	TANGO6	TNG6_HUMAN Transport and Golgi organization protein 6 homolog	8	5.65349	5.61311	6.69583	6.66296	6.32368	6.42058	6.78121	6.43336	6.15635	6.48971	1.05415	0.0760788	0.0981649	0.0308812
sp|O15344|TRI18_HUMAN	MID1	TRI18_HUMAN E3 ubiquitin-protein ligase Midline-1	14	5.99803	5.99259	6.29734	6.45421	6.35413	6.54338	6.61472	6.56962	6.18554	6.52046	1.05415	0.0760742	0.0369923	0.0175962
sp|Q9Y303-3|NAGA_HUMAN	AMDHD2	NAGA_HUMAN Isoform 3 of Putative N-acetylglucosamine-6-phosphate deacetylase	6	5.99077	5.73137	5.92453	6.34234	6.58901	6.05892	6.28369	6.35602	5.99725	6.32191	1.05413	0.0760588	0.0425232	0.0345507
sp|P13861|KAP2_HUMAN	PRKAR2A	KAP2_HUMAN cAMP-dependent protein kinase type II-alpha regulatory subunit	13	5.8438	5.72659	6.31497	6.33474	6.16909	5.68148	6.78592	6.89402	6.05502	6.38263	1.0541	0.0760175	0.0520773	0.0886923
sp|Q5JPI9|MET10_HUMAN	METTL10	MET10_HUMAN Methyltransferase-like protein 10	2	5.93971	6.6422	6.39529	6.19186	6.81801	5.62697	7.18784	6.89699	6.29227	6.63245	1.05406	0.075963	0.0474514	0.103872
sp|Q9UGN5|PARP2_HUMAN	PARP2	PARP2_HUMAN Poly [ADP-ribose] polymerase 2	6	6.04858	5.85732	6.16724	6.51203	6.21314	6.48635	6.73061	6.48371	6.14629	6.47845	1.05404	0.0759328	0.0447799	0.0326306
sp|Q8TCJ2|STT3B_HUMAN	STT3B	STT3B_HUMAN Dolichyl-diphosphooligosaccharide--protein glycosyltransferase subunit STT3B	14	6.02891	5.94544	6.16007	6.6663	6.06309	6.45496	6.898	6.72445	6.20018	6.53512	1.05402	0.0759047	0.0521049	0.0556484
sp|Q92552|RT27_HUMAN	MRPS27	RT27_HUMAN 28S ribosomal protein S27, mitochondrial	23	5.96161	6.17182	6.03225	6.47362	6.28056	6.37761	6.48812	6.82353	6.15983	6.49245	1.054	0.0758747	0.0368026	0.0364184
sp|Q92636-2|FAN_HUMAN	NSMAF	FAN_HUMAN Isoform 2 of Protein FAN	10	5.90002	5.67768	6.21309	6.10159	6.09632	6.16158	6.30047	6.62268	5.9731	6.29526	1.05394	0.0757879	0.0394668	0.0372172
sp|Q13564|ULA1_HUMAN	NAE1	ULA1_HUMAN NEDD8-activating enzyme E1 regulatory subunit	16	5.67711	5.53996	6.21886	6.48681	5.80853	5.94972	6.74764	6.70706	5.98068	6.30324	1.05393	0.0757823	0.0747318	0.0782743
sp|Q9BZE2|PUS3_HUMAN	PUS3	PUS3_HUMAN tRNA pseudouridine(38/39) synthase	5	5.78848	5.72425	6.54064	6.67738	6.50984	6.43897	6.60131	6.51315	6.18269	6.51582	1.05388	0.0757121	0.080244	0.0102023
sp|Q5ST30-4|SYVM_HUMAN	VARS2	SYVM_HUMAN Isoform 4 of Valine--tRNA ligase, mitochondrial	10	5.69223	5.68247	6.45829	6.61898	6.21285	6.16984	6.57685	6.80968	6.11299	6.44231	1.05387	0.0756982	0.0811165	0.0474178
sp|P63096|GNAI1_HUMAN	GNAI1	GNAI1_HUMAN Guanine nucleotide-binding protein G(i) subunit alpha-1	4	6.18156	6.17007	5.95414	6.34705	6.37344	6.17211	7.00723	6.42806	6.1632	6.49521	1.05387	0.0756954	0.0261443	0.055218
sp|Q6PCB7|S27A1_HUMAN	SLC27A1	S27A1_HUMAN Long-chain fatty acid transport protein 1	2	5.92676	5.55518	7.2226	6.33966	6.17807	6.93458	7.00657	6.27338	6.26105	6.59815	1.05384	0.075657	0.114462	0.0655934
sp|Q8N1F8|S11IP_HUMAN	STK11IP	S11IP_HUMAN Serine/threonine-protein kinase 11-interacting protein	3	5.69214	5.91554	6.33695	6.86867	6.17566	6.34562	6.97037	6.65533	6.20332	6.53674	1.05375	0.0755307	0.0834879	0.0536529
sp|Q99717|SMAD5_HUMAN	SMAD5	SMAD5_HUMAN Mothers against decapentaplegic homolog 5	4	6.12397	5.27956	5.75285	6.51384	5.5248	5.99242	7.1549	6.26989	5.91756	6.2355	1.05373	0.0755046	0.0890111	0.109971
sp|Q9H4Z3|PCIF1_HUMAN	PCIF1	PCIF1_HUMAN Phosphorylated CTD-interacting factor 1	4	5.85417	5.66905	6.25479	6.59527	6.29209	6.03471	6.68925	6.66673	6.09332	6.4207	1.05373	0.075501	0.0680117	0.0491016
sp|Q96A33|CCD47_HUMAN	CCDC47	CCD47_HUMAN Coiled-coil domain-containing protein 47	22	6.04185	5.92969	6.29437	6.48877	6.41494	6.22631	6.74293	6.70031	6.18867	6.52112	1.05372	0.0754909	0.0406498	0.0375098
sp|P27338|AOFB_HUMAN	MAOB	AOFB_HUMAN Amine oxidase [flavin-containing] B	17	5.89569	6.12183	6.2555	6.28274	6.25917	6.31652	6.64712	6.6518	6.13894	6.46865	1.05371	0.0754756	0.0287926	0.0324791
sp|Q8TD19|NEK9_HUMAN	NEK9	NEK9_HUMAN Serine/threonine-protein kinase Nek9	18	6.13297	5.6719	6.58875	6.85265	6.33215	6.27495	7.09166	6.90325	6.31157	6.6505	1.0537	0.075465	0.0823616	0.0614406
sp|Q13144|EI2BE_HUMAN	EIF2B5	EI2BE_HUMAN Translation initiation factor eIF-2B subunit epsilon	12	6.11579	6.06162	6.60664	6.40983	6.40728	6.35329	7.06833	6.71762	6.29847	6.63663	1.05369	0.0754494	0.0406687	0.049656
sp|Q5JS54-2|PSMG4_HUMAN	PSMG4	PSMG4_HUMAN Isoform 2 of Proteasome assembly chaperone 4	3	6.66726	6.16681	5.84683	6.64163	6.22769	6.53099	6.99305	6.92993	6.33063	6.67042	1.05367	0.0754269	0.0625857	0.0538367
sp|O60716|CTND1_HUMAN	CTNND1	CTND1_HUMAN Catenin delta-1	32	6.15921	5.96516	6.3491	6.40426	6.3733	6.46195	6.83538	6.54133	6.21943	6.55299	1.05363	0.0753704	0.0320574	0.0305785
sp|O60678|ANM3_HUMAN	PRMT3	ANM3_HUMAN Protein arginine N-methyltransferase 3	11	5.97101	6.0238	6.24187	6.48494	6.1714	6.42906	6.7956	6.65041	6.18041	6.51162	1.05359	0.0753146	0.0379333	0.0418205
sp|Q9H9Y6|RPA2_HUMAN	POLR1B	RPA2_HUMAN DNA-directed RNA polymerase I subunit RPA2	22	5.94199	5.84555	6.33989	6.37244	6.51428	6.34082	6.62846	6.32914	6.12497	6.45317	1.05359	0.075307	0.044111	0.022361
sp|P08240|SRPR_HUMAN	SRPR	SRPR_HUMAN Signal recognition particle receptor subunit alpha	26	5.95059	5.91554	6.52376	6.47234	6.51481	6.29032	6.64718	6.74192	6.21556	6.54856	1.05358	0.0752933	0.0526392	0.0298904
sp|Q14203|DCTN1_HUMAN	DCTN1	DCTN1_HUMAN Dynactin subunit 1	40	5.76598	5.68793	6.47186	6.51164	6.19977	6.11933	6.74278	6.6843	6.10935	6.43654	1.05356	0.075267	0.0725119	0.050091
sp|Q7Z3C6|ATG9A_HUMAN	ATG9A	ATG9A_HUMAN Autophagy-related protein 9A	10	5.84698	5.74927	6.26376	6.65655	6.19788	6.13072	6.77751	6.72281	6.12914	6.45723	1.05353	0.0752308	0.0679399	0.0526681
sp|Q01831|XPC_HUMAN	XPC	XPC_HUMAN DNA repair protein complementing XP-C cells	3	5.45936	5.47838	6.40046	7.01057	6.84896	6.52188	6.25789	6.02333	6.08719	6.41301	1.05353	0.0752258	0.124231	0.0553373
sp|Q92621|NU205_HUMAN	NUP205	NU205_HUMAN Nuclear pore complex protein Nup205	34	5.83318	6.01014	6.73329	6.52307	6.43	6.36709	6.95733	6.68833	6.27492	6.61069	1.05351	0.0752033	0.0674198	0.0407941
sp|Q9UI09|NDUAC_HUMAN	NDUFA12	NDUAC_HUMAN NADH dehydrogenase [ubiquinone] 1 alpha subcomplex subunit 12	6	5.85845	5.92213	6.48705	6.65763	6.66129	6.00831	6.92202	6.66528	6.23132	6.56422	1.05343	0.075088	0.0643101	0.0594385
sp|Q6YHU6|THADA_HUMAN	THADA	THADA_HUMAN Thyroid adenoma-associated protein	15	6.11381	5.80572	6.75473	6.31176	6.5183	6.23147	6.87719	6.69369	6.2465	6.58016	1.05342	0.075074	0.0636645	0.0417602
sp|P03891|NU2M_HUMAN	MT-ND2	NU2M_HUMAN NADH-ubiquinone oxidoreductase chain 2	2	6.46893	5.8754	6.73635	6.85126	6.16867	6.36425	7.85211	6.93014	6.48299	6.82879	1.05334	0.0749723	0.0671875	0.110527
sp|Q9NXR7-1|BRE_HUMAN	BRE	BRE_HUMAN Isoform 1 of BRCA1-A complex subunit BRE	6	5.92743	6.50753	6.03261	5.95492	6.34883	6.49644	6.38947	6.48959	6.10562	6.43108	1.0533	0.0749232	0.0444861	0.0114236
sp|Q9NR77|PXMP2_HUMAN	PXMP2	PXMP2_HUMAN Peroxisomal membrane protein 2	2	6.18309	5.82825	6.41153	6.78704	6.34898	6.01527	7.59792	6.5914	6.30248	6.63839	1.0533	0.0749149	0.0638519	0.10272
sp|O60610|DIAP1_HUMAN	DIAPH1	DIAP1_HUMAN Protein diaphanous homolog 1	57	5.83113	5.89714	6.27005	6.42734	6.24315	6.2697	6.62196	6.59229	6.10642	6.43178	1.05328	0.0748913	0.0472123	0.031582
sp|P53004|BIEA_HUMAN	BLVRA	BIEA_HUMAN Biliverdin reductase A	27	5.55148	5.62838	6.46568	6.2925	6.12184	5.78428	6.61909	6.68823	5.98451	6.30336	1.05328	0.0748879	0.077223	0.0679406
sp|P63010-2|AP2B1_HUMAN	AP2B1	AP2B1_HUMAN Isoform 2 of AP-2 complex subunit beta	56	6.01457	6.11017	6.11991	6.19576	6.30113	6.36262	6.57005	6.50793	6.1101	6.43543	1.05324	0.0748405	0.0121596	0.0193909
sp|Q8N1F7|NUP93_HUMAN	NUP93	NUP93_HUMAN Nuclear pore complex protein Nup93	35	6.05382	5.89697	6.42163	6.40536	6.40255	6.2723	6.70385	6.71735	6.19444	6.52401	1.0532	0.0747845	0.0421347	0.034026
sp|O95671|ASML_HUMAN	ASMTL	ASML_HUMAN N-acetylserotonin O-methyltransferase-like protein	12	6.07544	6.142	6.58935	6.62935	6.34498	6.53047	7.24024	6.67362	6.35903	6.69733	1.0532	0.0747777	0.0457258	0.0576554
sp|O00566|MPP10_HUMAN	MPHOSPH10	MPP10_HUMAN U3 small nucleolar ribonucleoprotein protein MPP10	3	5.75955	5.24604	6.73566	7.09884	6.73404	6.22228	6.86665	6.33788	6.21002	6.54021	1.05317	0.074739	0.13785	0.047222
sp|Q96E52|OMA1_HUMAN	OMA1	OMA1_HUMAN Metalloendopeptidase OMA1, mitochondrial	4	5.64764	5.89376	6.39356	6.00827	6.34722	6.38468	6.0962	6.38479	5.98581	6.30322	1.05303	0.0745437	0.0519055	0.022075
sp|P62879|GBB2_HUMAN	GNB2	GBB2_HUMAN Guanine nucleotide-binding protein G(I)/G(S)/G(T) subunit beta-2	23	6.04894	6.09923	6.51964	6.19079	6.37504	6.26129	6.95589	6.58362	6.21465	6.54396	1.05299	0.0744908	0.0340544	0.0466597
sp|Q9NQ55-3|SSF1_HUMAN	PPAN	SSF1_HUMAN Isoform 3 of Suppressor of SWI4 1 homolog	9	6.02666	5.90937	6.37453	6.13739	6.56262	6.59002	6.50511	6.08518	6.11199	6.43573	1.05297	0.0744628	0.0324362	0.036727
sp|P28340|DPOD1_HUMAN	POLD1	DPOD1_HUMAN DNA polymerase delta catalytic subunit	30	5.9473	6.11518	6.352	6.3695	6.4515	6.40023	6.65156	6.59337	6.19599	6.52416	1.05296	0.0744573	0.0326562	0.0180621
sp|Q92543|SNX19_HUMAN	SNX19	SNX19_HUMAN Sorting nexin-19	3	5.95263	6.08607	6.29086	6.40293	6.25149	6.43232	6.61575	6.74118	6.18312	6.51018	1.0529	0.074363	0.0326771	0.0328836
sp|Q9UDY4|DNJB4_HUMAN	DNAJB4	DNJB4_HUMAN DnaJ homolog subfamily B member 4	15	6.1973	5.93267	6.16232	6.01355	6.51942	6.28207	6.3477	6.44197	6.07646	6.39779	1.05288	0.0743425	0.0205124	0.0163051
sp|P57060|RWD2B_HUMAN	RWDD2B	RWD2B_HUMAN RWD domain-containing protein 2B	2	5.94482	6.49773	6.01991	6.14779	6.51706	6.0985	6.75946	6.53586	6.15256	6.47772	1.05285	0.0742987	0.0398033	0.0425689
sp|O60762|DPM1_HUMAN	DPM1	DPM1_HUMAN Dolichol-phosphate mannosyltransferase	12	5.94466	5.69467	6.36333	6.31111	6.15501	6.11606	6.90926	6.4184	6.07844	6.39968	1.05285	0.0742986	0.0520656	0.0570805
sp|O00257|CBX4_HUMAN	CBX4	CBX4_HUMAN E3 SUMO-protein ligase CBX4	6	5.8462	6.24349	6.35542	5.8262	6.06506	6.34844	6.9308	6.20912	6.06783	6.38835	1.05282	0.0742644	0.0447374	0.0594341
sp|Q9NZD8|SPG21_HUMAN	SPG21	SPG21_HUMAN Maspardin	12	5.95576	5.98614	6.68256	6.62832	6.35949	6.26331	7.06958	6.89347	6.3132	6.64646	1.05279	0.0742164	0.0627265	0.0595015
sp|Q5GLZ8|HERC4_HUMAN	HERC4	HERC4_HUMAN Probable E3 ubiquitin-protein ligase HERC4	27	5.72145	5.65049	6.30743	6.6029	6.11025	6.15127	6.69333	6.60848	6.07057	6.39083	1.05276	0.0741725	0.0759561	0.0473742
sp|Q8N6R0|MET13_HUMAN	METTL13	MET13_HUMAN Methyltransferase-like protein 13	13	5.99013	6.01987	6.54132	6.41158	6.22031	6.60626	6.71248	6.74005	6.24073	6.56977	1.05273	0.0741303	0.0444761	0.0365325
sp|Q8IVH8|M4K3_HUMAN	MAP4K3	M4K3_HUMAN Mitogen-activated protein kinase kinase kinase kinase 3	4	6.25657	5.95238	6.29138	6.26584	6.7863	6.50342	6.49799	6.28405	6.19154	6.51794	1.05272	0.0741172	0.025861	0.0316079
sp|P10586|PTPRF_HUMAN	PTPRF	PTPRF_HUMAN Receptor-type tyrosine-protein phosphatase F	21	5.73301	5.96351	6.07275	6.58734	6.10851	6.12622	6.58257	6.82155	6.08915	6.40971	1.05264	0.0740182	0.0592949	0.054833
sp|P23677|IP3KA_HUMAN	ITPKA	IP3KA_HUMAN Inositol-trisphosphate 3-kinase A	6	5.7675	5.97586	6.36697	6.51348	6.32645	6.28221	6.48852	6.82268	6.15595	6.47996	1.05263	0.0740039	0.055934	0.037822
sp|P49840|GSK3A_HUMAN	GSK3A	GSK3A_HUMAN Glycogen synthase kinase-3 alpha	17	5.47789	5.60299	6.35774	6.61229	5.7605	5.90777	6.79005	6.85832	6.01273	6.32916	1.05263	0.0739945	0.0927213	0.0909179
sp|P53396|ACLY_HUMAN	ACLY	ACLY_HUMAN ATP-citrate synthase	118	5.81109	5.92336	6.18324	6.37506	6.1576	6.08515	6.61222	6.71614	6.07319	6.39278	1.05262	0.073989	0.0419132	0.0496853
sp|O75884|RBBP9_HUMAN	RBBP9	RBBP9_HUMAN Putative hydrolase RBBP9	5	5.65412	5.90727	6.66273	6.61761	6.29558	6.16186	6.80182	6.88961	6.21043	6.53722	1.05262	0.073983	0.0816691	0.0553995
sp|O94889|KLH18_HUMAN	KLHL18	KLH18_HUMAN Kelch-like protein 18	2	6.2515	6.2721	6.4243	6.00451	6.20166	6.69029	6.78574	6.58626	6.2381	6.56599	1.05256	0.0739047	0.0278535	0.0390165
sp|Q96QG7|MTMR9_HUMAN	MTMR9	MTMR9_HUMAN Myotubularin-related protein 9	12	5.83957	5.85597	6.18586	6.58841	6.30902	6.10665	6.64323	6.69551	6.11745	6.4386	1.0525	0.0738166	0.0575682	0.0434561
sp|P13987|CD59_HUMAN	CD59	CD59_HUMAN CD59 glycoprotein	4	5.9383	6.09778	5.7208	6.21014	6.39022	6.86662	5.89913	6.06916	5.99175	6.30628	1.05249	0.0738112	0.0354312	0.0674645
sp|O95140|MFN2_HUMAN	MFN2	MFN2_HUMAN Mitofusin-2	15	5.95708	5.77557	6.58198	6.54442	6.16396	6.42172	6.83238	6.74557	6.21476	6.54091	1.05248	0.0737916	0.0658746	0.0469678
sp|Q8WVZ9|KBTB7_HUMAN	KBTBD7	KBTB7_HUMAN Kelch repeat and BTB domain-containing protein 7	5	6.04317	5.90294	6.12625	6.45088	6.33122	6.05821	6.83747	6.58329	6.13081	6.45255	1.05248	0.0737912	0.0379118	0.0518254
sp|Q86TI0|TBCD1_HUMAN	TBC1D1	TBCD1_HUMAN TBC1 domain family member 1	7	5.81428	5.59101	6.56471	6.57868	6.00932	6.21311	6.80795	6.80604	6.13717	6.45911	1.05246	0.0737607	0.0830986	0.0635126
sp|Q8N4Q0|ZADH2_HUMAN	ZADH2	ZADH2_HUMAN Zinc-binding alcohol dehydrogenase domain-containing protein 2	7	5.56296	5.76794	6.08655	6.45789	6.01267	6.14896	6.47087	6.49437	5.96883	6.28172	1.05242	0.0737097	0.0654699	0.0380078
sp|Q16740|CLPP_HUMAN	CLPP	CLPP_HUMAN Putative ATP-dependent Clp protease proteolytic subunit, mitochondrial	19	5.64254	6.00427	5.95039	6.15356	6.07144	6.38809	6.11905	6.41707	5.93769	6.24891	1.05241	0.0737034	0.0361614	0.0286279
sp|Q9Y4K3|TRAF6_HUMAN	TRAF6	TRAF6_HUMAN TNF receptor-associated factor 6	2	5.43591	6.01882	6.28036	6.84158	6.42722	6.29107	6.93291	6.21166	6.14417	6.46571	1.05233	0.0735924	0.0950079	0.0501001
sp|Q8NB16|MLKL_HUMAN	MLKL	MLKL_HUMAN Mixed lineage kinase domain-like protein	5	5.70329	5.93184	6.59034	6.55826	6.36586	6.52461	6.7804	6.40973	6.19593	6.52015	1.05233	0.0735837	0.0721353	0.0285214
sp|Q9H903|MTD2L_HUMAN	MTHFD2L	MTD2L_HUMAN Probable bifunctional methylenetetrahydrofolate dehydrogenase/cyclohydrolase 2	2	5.3551	5.6591	6.89691	6.63186	6.15931	6.86628	6.78737	6.01388	6.13574	6.45671	1.05231	0.0735613	0.121311	0.067012
sp|Q7Z7E8|UB2Q1_HUMAN	UBE2Q1	UB2Q1_HUMAN Ubiquitin-conjugating enzyme E2 Q1	10	5.82412	6.11363	6.16138	6.33222	6.33671	6.21058	6.60248	6.55945	6.10784	6.42731	1.0523	0.0735523	0.0345691	0.0288745
sp|Q8TCY9|URGCP_HUMAN	URGCP	URGCP_HUMAN Up-regulator of cell proliferation	7	5.80517	5.84249	6.43617	6.49593	6.26719	6.33438	6.7069	6.55686	6.14494	6.46633	1.0523	0.0735488	0.0605213	0.0313311
sp|Q15785|TOM34_HUMAN	TOMM34	TOM34_HUMAN Mitochondrial import receptor subunit TOM34	26	5.82847	5.9614	5.85127	6.2745	6.09053	6.04275	6.5199	6.51316	5.97891	6.29158	1.0523	0.073541	0.0343591	0.0414029
sp|Q9NZT2|OGFR_HUMAN	OGFR	OGFR_HUMAN Opioid growth factor receptor	19	5.86839	5.72	6.46805	6.80301	6.17221	6.22639	6.90353	6.85688	6.21486	6.53975	1.05228	0.0735136	0.0817797	0.0602779
sp|Q9Y394|DHRS7_HUMAN	DHRS7	DHRS7_HUMAN Dehydrogenase/reductase SDR family member 7	16	6.00232	5.91914	6.47882	6.53229	6.22322	6.3236	6.8095	6.87821	6.23314	6.55863	1.05222	0.0734353	0.0508788	0.0507834
sp|O00255|MEN1_HUMAN	MEN1	MEN1_HUMAN Menin	3	6.21833	5.70352	5.93595	6.32762	6.19565	6.30627	6.50374	6.44094	6.04635	6.36165	1.05215	0.0733353	0.0466239	0.0216863
sp|O60502|NCOAT_HUMAN	MGEA5	NCOAT_HUMAN Bifunctional protein NCOAT	40	5.923	5.82873	6.38836	6.54586	6.1937	6.22469	6.77178	6.78297	6.17149	6.49328	1.05214	0.0733303	0.0566288	0.0505622
sp|Q01484|ANK2_HUMAN	ANK2	ANK2_HUMAN Ankyrin-2	4	6.30506	6.51335	6.61317	6.40782	6.83617	6.86094	6.65746	6.83187	6.45985	6.79661	1.05213	0.0733147	0.0205828	0.0137785
sp|Q9H3P7|GCP60_HUMAN	ACBD3	GCP60_HUMAN Golgi resident protein GCP60	20	5.82368	5.81113	5.98769	6.2877	5.99028	6.11084	6.61722	6.43751	5.97755	6.28896	1.0521	0.0732677	0.0371158	0.0459714
sp|Q12766|HMGX3_HUMAN	HMGXB3	HMGX3_HUMAN HMG domain-containing protein 3	4	6.15024	5.82608	6.22493	6.23121	6.48079	6.53989	6.40095	6.28314	6.10812	6.42619	1.05207	0.073237	0.0313659	0.0172839
sp|O14519|CDKA1_HUMAN	CDK2AP1	CDKA1_HUMAN Cyclin-dependent kinase 2-associated protein 1	1	4.33511	7.1037	6.52601	5.8652	6.59125	7.14425	4.28675	7.04659	5.9575	6.26721	1.05199	0.0731151	0.200437	0.214149
sp|P49005|DPOD2_HUMAN	POLD2	DPOD2_HUMAN DNA polymerase delta subunit 2	11	6.13646	5.96914	6.24122	6.72502	6.3701	6.7755	6.71819	6.51124	6.26796	6.59376	1.05198	0.0731049	0.0517961	0.0284194
sp|O00767|ACOD_HUMAN	SCD	ACOD_HUMAN Acyl-CoA desaturase	11	5.97639	6.1866	6.1016	6.34342	6.42465	6.20159	6.72854	6.53167	6.152	6.47161	1.05195	0.0730691	0.0250448	0.0339403
sp|Q96GM5|SMRD1_HUMAN	SMARCD1	SMRD1_HUMAN SWI/SNF-related matrix-associated actin-dependent regulator of chromatin subfamily D member 1	8	5.96505	5.8827	5.78682	6.21478	5.90042	6.32513	6.318	6.54464	5.96234	6.27205	1.05194	0.0730584	0.0307562	0.0429144
sp|Q16851|UGPA_HUMAN	UGP2	UGPA_HUMAN UTP--glucose-1-phosphate uridylyltransferase	29	5.73016	5.94494	6.24663	6.30147	5.97261	6.19524	6.71337	6.59994	6.0558	6.37029	1.05193	0.0730415	0.044217	0.0543212
sp|Q00613|HSF1_HUMAN	HSF1	HSF1_HUMAN Heat shock factor protein 1	17	5.85312	5.97271	6.05511	6.1578	6.01119	6.25976	6.53864	6.47744	6.00968	6.32176	1.05193	0.0730363	0.0214564	0.0378289
sp|O95644|NFAC1_HUMAN	NFATC1	NFAC1_HUMAN Nuclear factor of activated T-cells, cytoplasmic 1	2	5.98403	6.1865	6.75322	5.99142	7.20071	5.72633	5.99551	7.28639	6.22879	6.55224	1.05193	0.0730346	0.0581124	0.123095
sp|O43353|RIPK2_HUMAN	RIPK2	RIPK2_HUMAN Receptor-interacting serine/threonine-protein kinase 2	12	6.11562	6.15243	6.30982	6.12152	6.68694	6.73037	6.15274	6.4119	6.17485	6.49549	1.05193	0.0730343	0.0148049	0.0413373
sp|P29350-3|PTN6_HUMAN	PTPN6	PTN6_HUMAN Isoform 2 of Tyrosine-protein phosphatase non-receptor type 6	13	5.78225	5.71016	6.26404	6.52183	6.35389	6.14437	6.64443	6.39553	6.06957	6.38456	1.0519	0.0729918	0.0640989	0.0321354
sp|Q9H9S4|CB39L_HUMAN	CAB39L	CB39L_HUMAN Calcium-binding protein 39-like	1	6.14748	5.63909	5.65087	6.15268	5.97483	5.69437	6.61038	6.53454	5.89753	6.20353	1.05189	0.0729785	0.0494558	0.0712832
sp|Q99460|PSMD1_HUMAN	PSMD1	PSMD1_HUMAN 26S proteasome non-ATPase regulatory subunit 1	68	6.07568	6.08921	6.15542	6.32127	6.27696	6.35311	6.71845	6.57149	6.16039	6.48	1.05188	0.0729715	0.0183052	0.031191
sp|Q8IWA0|WDR75_HUMAN	WDR75	WDR75_HUMAN WD repeat-containing protein 75	12	6.21272	5.86886	6.54034	6.42622	6.23989	6.35759	6.98357	6.76644	6.26204	6.58687	1.05187	0.0729621	0.0471412	0.0527792
sp|Q9Y5K5|UCHL5_HUMAN	UCHL5	UCHL5_HUMAN Ubiquitin carboxyl-terminal hydrolase isozyme L5	29	5.97368	5.94405	6.29722	6.29194	6.25714	6.32972	6.68758	6.50308	6.12672	6.44438	1.05185	0.0729261	0.0316995	0.0298211
sp|Q6NXG1|ESRP1_HUMAN	ESRP1	ESRP1_HUMAN Epithelial splicing regulatory protein 1	17	6.22871	5.71221	6.44069	6.5813	6.27675	5.9527	7.00562	7.02136	6.24073	6.56411	1.05182	0.0728846	0.0610482	0.081586
sp|Q9P0V3|SH3B4_HUMAN	SH3BP4	SH3B4_HUMAN SH3 domain-binding protein 4	5	5.81745	5.66437	6.99224	6.76035	6.16215	6.2997	7.02641	7.05303	6.3086	6.63532	1.05179	0.0728461	0.105452	0.0709005
sp|Q9Y535|RPC8_HUMAN	POLR3H	RPC8_HUMAN DNA-directed RNA polymerase III subunit RPC8	6	5.3775	5.50612	6.46397	6.30213	6.07418	6.08536	6.08911	6.62462	5.91243	6.21832	1.05174	0.0727731	0.0930141	0.0435717
sp|A1XBS5|F92A1_HUMAN	FAM92A1	F92A1_HUMAN Protein FAM92A1	8	5.71897	5.71942	6.09542	6.54441	6.21579	6.3738	6.31917	6.41471	6.01955	6.33087	1.05172	0.0727464	0.0651683	0.0136039
sp|Q13425|SNTB2_HUMAN	SNTB2	SNTB2_HUMAN Beta-2-syntrophin	11	5.97238	6.04333	6.31841	6.46772	6.4316	6.11836	6.84627	6.68618	6.20046	6.5206	1.05163	0.07263	0.0374835	0.0487543
sp|Q9UKK3|PARP4_HUMAN	PARP4	PARP4_HUMAN Poly [ADP-ribose] polymerase 4	34	6.02425	6.00501	6.34828	6.38835	6.3606	6.17899	6.87626	6.62855	6.19147	6.5111	1.05162	0.0726187	0.0331108	0.0469277
sp|Q9Y6D5|BIG2_HUMAN	ARFGEF2	BIG2_HUMAN Brefeldin A-inhibited guanine nucleotide-exchange protein 2	8	5.81042	5.70277	6.51916	6.73216	6.48925	6.71831	6.77765	6.05773	6.19113	6.51074	1.05162	0.0726182	0.082558	0.0501636
sp|O95466-3|FMNL_HUMAN	FMNL1	FMNL_HUMAN Isoform 3 of Formin-like protein 1	1	6.20591	5.4537	5.40321	6.27411	6.11499	5.94305	6.13079	6.35244	5.83423	6.13532	1.05161	0.0725951	0.0805299	0.0273615
sp|Q9Y646|CBPQ_HUMAN	CPQ	CBPQ_HUMAN Carboxypeptidase Q	1	6.29279	5.63482	6.0239	5.02941	5.22769	7.80489	4.92218	6.21206	5.74523	6.04171	1.0516	0.0725911	0.0954446	0.214827
sp|Q13795|ARFRP_HUMAN	ARFRP1	ARFRP_HUMAN ADP-ribosylation factor-related protein 1	7	6.19033	6.10121	6.26857	5.94969	6.65526	6.48866	6.33518	6.29467	6.12745	6.44344	1.05157	0.0725449	0.0223284	0.0254644
sp|Q9P2J5|SYLC_HUMAN	LARS	SYLC_HUMAN Leucine--tRNA ligase, cytoplasmic	56	6.05647	5.66509	6.43786	6.56446	6.34732	6.14092	6.81185	6.69799	6.18097	6.49952	1.05154	0.0724999	0.0656975	0.0477288
sp|Q16512-2|PKN1_HUMAN	PKN1	PKN1_HUMAN Isoform 2 of Serine/threonine-protein kinase N1	27	5.59741	6.18653	6.24146	6.42363	6.03825	6.06232	6.74421	6.86344	6.11226	6.42706	1.0515	0.0724525	0.0585509	0.0681309
sp|Q9NXU5|ARL15_HUMAN	ARL15	ARL15_HUMAN ADP-ribosylation factor-like protein 15	4	5.95234	6.06884	6.50164	6.3838	6.26289	6.18004	6.7882	6.95824	6.22666	6.54734	1.0515	0.0724521	0.0415149	0.05867
sp|Q9P1Q0|VPS54_HUMAN	VPS54	VPS54_HUMAN Vacuolar protein sorting-associated protein 54	1	5.57552	5.08481	6.55078	7.68163	7.22541	5.23613	8.06307	5.65002	6.22318	6.54366	1.0515	0.0724441	0.184379	0.202769
sp|Q92615|LAR4B_HUMAN	LARP4B	LAR4B_HUMAN La-related protein 4B	14	6.18565	5.81583	6.42115	6.29361	6.50416	6.2942	6.55106	6.63938	6.17906	6.4972	1.05149	0.0724307	0.0421718	0.0225459
sp|Q13356|PPIL2_HUMAN	PPIL2	PPIL2_HUMAN Peptidyl-prolyl cis-trans isomerase-like 2	12	5.76139	6.01399	6.36368	6.55446	6.5487	6.21096	6.58823	6.61612	6.17338	6.491	1.05145	0.0723807	0.0573909	0.0290761
sp|O00522|KRIT1_HUMAN	KRIT1	KRIT1_HUMAN Krev interaction trapped protein 1	2	5.83541	5.68116	6.61306	6.23688	6.62693	6.17651	6.94886	5.86758	6.09163	6.40497	1.05144	0.0723641	0.0688115	0.0746629
sp|O00303|EIF3F_HUMAN	EIF3F	EIF3F_HUMAN Eukaryotic translation initiation factor 3 subunit F	27	5.94893	5.81494	6.12543	6.47111	6.07869	6.19494	6.60107	6.73852	6.0901	6.40331	1.05143	0.0723502	0.0466418	0.0494074
sp|Q6L8Q7|PDE12_HUMAN	PDE12	PDE12_HUMAN 2',5'-phosphodiesterase 12	23	5.82371	5.87607	6.17972	6.39821	6.08142	6.17059	6.63863	6.63533	6.06943	6.38149	1.05142	0.0723334	0.0444167	0.0465804
sp|Q9BT78|CSN4_HUMAN	COPS4	CSN4_HUMAN COP9 signalosome complex subunit 4	30	5.91457	5.83253	6.0812	6.28052	6.10204	6.18784	6.46753	6.59032	6.0272	6.33693	1.05139	0.0722955	0.032859	0.036291
sp|Q86VI3|IQGA3_HUMAN	IQGAP3	IQGA3_HUMAN Ras GTPase-activating-like protein IQGAP3	16	5.8625	5.78459	6.31874	6.51473	6.30115	6.14399	6.64862	6.64481	6.12014	6.43464	1.05139	0.0722953	0.0577007	0.0393418
sp|O00186|STXB3_HUMAN	STXBP3	STXB3_HUMAN Syntaxin-binding protein 3	11	5.90876	6.08993	6.52366	6.43087	6.41129	6.35423	6.71693	6.75265	6.2383	6.55877	1.05137	0.0722723	0.0461934	0.0312702
sp|P56556|NDUA6_HUMAN	NDUFA6	NDUA6_HUMAN NADH dehydrogenase [ubiquinone] 1 alpha subcomplex subunit 6	7	6.08786	5.67577	6.58111	6.31043	6.08604	6.48954	6.65932	6.68678	6.16379	6.48042	1.05137	0.072269	0.0621033	0.0427461
sp|Q86Y07|VRK2_HUMAN	VRK2	VRK2_HUMAN Serine/threonine-protein kinase VRK2	3	6.30974	5.98826	6.18664	5.85404	6.70041	6.06643	6.44896	6.37305	6.08467	6.39721	1.05137	0.0722644	0.0333507	0.0408234
sp|O95373|IPO7_HUMAN	IPO7	IPO7_HUMAN Importin-7	37	6.02105	5.84123	6.57724	6.59229	6.34345	6.49404	6.83537	6.64423	6.25795	6.57927	1.05135	0.0722374	0.0614408	0.0319645
sp|Q9Y613|FHOD1_HUMAN	FHOD1	FHOD1_HUMAN FH1/FH2 domain-containing protein 1	10	5.75919	5.83812	6.48421	6.31008	6.69812	5.84555	6.78519	6.31509	6.0979	6.41099	1.05134	0.0722341	0.0580927	0.0668718
sp|Q8NBJ7|SUMF2_HUMAN	SUMF2	SUMF2_HUMAN Sulfatase-modifying factor 2	10	5.62095	5.52238	6.08461	6.65082	6.05567	6.15161	6.46242	6.43501	5.96969	6.27618	1.05134	0.0722301	0.0864411	0.0324004
sp|Q9BQ69|MACD1_HUMAN	MACROD1	MACD1_HUMAN O-acetyl-ADP-ribose deacetylase MACROD1	8	5.83688	5.92607	6.48049	6.35621	6.44978	5.76262	6.63405	7.01575	6.14991	6.46555	1.05132	0.0722072	0.0514143	0.0811307
sp|Q96I51|WBS16_HUMAN	WBSCR16	WBS16_HUMAN Williams-Beuren syndrome chromosomal region 16 protein	10	5.97678	5.87888	6.39216	6.63206	6.16726	6.66163	6.68088	6.6465	6.21997	6.53907	1.0513	0.0721773	0.056838	0.0379673
sp|Q9HC21|TPC_HUMAN	SLC25A19	TPC_HUMAN Mitochondrial thiamine pyrophosphate carrier	7	6.00892	5.78446	6.45865	6.46237	6.61184	6.1169	6.75039	6.50211	6.1786	6.49531	1.05126	0.0721184	0.0547336	0.0418701
sp|Q9BW62|KATL1_HUMAN	KATNAL1	KATL1_HUMAN Katanin p60 ATPase-containing subunit A-like 1	6	5.79174	6.62631	6.04578	5.6739	6.35379	6.09587	6.51737	6.40797	6.03443	6.34375	1.05126	0.0721178	0.0702636	0.0281713
sp|O60343|TBCD4_HUMAN	TBC1D4	TBCD4_HUMAN TBC1 domain family member 4	35	5.82889	5.83929	6.33417	6.54326	6.18134	6.34088	6.6988	6.58261	6.1364	6.45091	1.05125	0.072109	0.058567	0.0361967
sp|Q7Z4W1|DCXR_HUMAN	DCXR	DCXR_HUMAN L-xylulose reductase	14	6.09458	5.82434	6.11893	6.32097	6.27326	6.12383	6.55058	6.65953	6.0897	6.4018	1.05125	0.0721053	0.03349	0.0385115
sp|Q8WYN0|ATG4A_HUMAN	ATG4A	ATG4A_HUMAN Cysteine protease ATG4A	2	5.78199	6.4022	7.3136	6.70046	6.9913	7.38879	6.45925	6.70122	6.54956	6.88514	1.05124	0.0720874	0.0972624	0.0581047
sp|P09874|PARP1_HUMAN	PARP1	PARP1_HUMAN Poly [ADP-ribose] polymerase 1	86	6.22874	5.91253	6.18931	6.16734	6.5289	6.35658	6.50249	6.36466	6.12448	6.43816	1.05122	0.0720605	0.0234412	0.0140164
sp|Q8TEU7-4|RPGF6_HUMAN	RAPGEF6	RPGF6_HUMAN Isoform 4 of Rap guanine nucleotide exchange factor 6	20	5.98716	5.94756	6.16094	6.50181	6.42766	6.33634	6.5124	6.58052	6.14937	6.46423	1.0512	0.0720405	0.0410738	0.0163563
sp|Q9BTC8|MTA3_HUMAN	MTA3	MTA3_HUMAN Metastasis-associated protein MTA3	9	6.03343	5.64505	6.10787	6.6188	6.21251	6.50084	6.57304	6.36826	6.10129	6.41366	1.0512	0.0720347	0.0656022	0.0247388
sp|Q6Q0C0|TRAF7_HUMAN	TRAF7	TRAF7_HUMAN E3 ubiquitin-protein ligase TRAF7	7	6.13179	5.73192	6.4652	6.15481	6.2232	6.39251	6.73055	6.38833	6.12093	6.43365	1.05109	0.071886	0.0491134	0.0331167
sp|Q9Y227|ENTP4_HUMAN	ENTPD4	ENTP4_HUMAN Ectonucleoside triphosphate diphosphohydrolase 4	4	5.71359	6.0756	5.86316	6.79759	6.16187	6.28767	6.63735	6.61152	6.11248	6.4246	1.05106	0.0718482	0.0785738	0.0368315
sp|P52948|NUP98_HUMAN	NUP98	NUP98_HUMAN Nuclear pore complex protein Nup98-Nup96	37	6.16883	6.07421	6.43079	6.34866	6.46565	6.40845	6.77102	6.65452	6.25562	6.57491	1.05104	0.0718177	0.026069	0.0255172
sp|Q4L235|ACSF4_HUMAN	AASDH	ACSF4_HUMAN Acyl-CoA synthetase family member 4	5	5.7372	6.08552	6.48637	6.14453	6.20218	6.1325	6.70155	6.66483	6.11341	6.42526	1.05101	0.0717798	0.0501849	0.0466217
tr|K7EMX1|K7EMX1_HUMAN	SPC24	K7EMX1_HUMAN Kinetochore protein Spc24 (Fragment)	7	5.48223	5.76231	6.53287	6.5383	6.2425	6.28929	6.52421	6.49925	6.07893	6.38881	1.05098	0.071731	0.0887594	0.0224728
sp|Q8IZJ1|UNC5B_HUMAN	UNC5B	UNC5B_HUMAN Netrin receptor UNC5B	3	5.96352	6.19425	6.10753	6.55263	6.2423	6.27096	6.5889	6.98086	6.20448	6.52075	1.05097	0.0717281	0.0404301	0.0528487
sp|Q16401|PSMD5_HUMAN	PSMD5	PSMD5_HUMAN 26S proteasome non-ATPase regulatory subunit 5	24	6.09089	6.00874	6.30399	6.41271	6.25372	6.30824	6.81174	6.70674	6.20408	6.52011	1.05094	0.0716784	0.0300798	0.0429925
sp|O14976|GAK_HUMAN	GAK	GAK_HUMAN Cyclin-G-associated kinase	23	5.88669	5.86756	6.44921	6.45878	6.17331	6.03621	6.87599	6.83257	6.16556	6.47952	1.05092	0.071655	0.0540373	0.067397
sp|O95248-4|MTMR5_HUMAN	SBF1	MTMR5_HUMAN Isoform 4 of Myotubularin-related protein 5	17	5.87624	5.84094	6.66629	6.32897	6.37548	6.35762	6.63705	6.60055	6.17811	6.49268	1.05092	0.0716474	0.0637858	0.022576
sp|Q9C035|TRIM5_HUMAN	TRIM5	TRIM5_HUMAN Tripartite motif-containing protein 5	6	5.66685	5.87088	6.44651	6.46062	6.03068	6.20469	6.94841	6.50549	6.11121	6.42232	1.05091	0.0716348	0.0661134	0.0625697
sp|Q2T9K0|TMM44_HUMAN	TMEM44	TMM44_HUMAN Transmembrane protein 44	2	5.67117	5.77671	6.01227	6.67933	5.66847	6.65217	6.77659	6.27084	6.03487	6.34202	1.0509	0.0716192	0.0750111	0.0785117
sp|Q96HE7|ERO1A_HUMAN	ERO1L	ERO1A_HUMAN ERO1-like protein alpha	37	5.77779	5.83238	6.01066	6.37192	6.16367	6.05747	6.46391	6.52816	5.99819	6.3033	1.05087	0.0715813	0.0447244	0.0362103
sp|Q9UHP3-3|UBP25_HUMAN	USP25	UBP25_HUMAN Isoform USP25m of Ubiquitin carboxyl-terminal hydrolase 25	15	5.73937	5.65395	6.08878	6.28859	6.06027	5.90437	6.49883	6.51634	5.94267	6.24495	1.05087	0.0715787	0.0500786	0.0496323
sp|P42574|CASP3_HUMAN	CASP3	CASP3_HUMAN Caspase-3	6	5.86138	5.89463	6.10223	6.0159	6.29403	6.61809	6.4083	5.76706	5.96853	6.27187	1.05082	0.0715188	0.0186224	0.0577675
sp|A2RTX5|SYTC2_HUMAN	TARSL2	SYTC2_HUMAN Probable threonine--tRNA ligase 2, cytoplasmic	8	6.1252	6.1919	6.10468	6.14748	5.99968	6.70473	6.46609	6.6474	6.14231	6.45448	1.05082	0.0715173	0.00608774	0.0495474
sp|Q8NFH3|NUP43_HUMAN	NUP43	NUP43_HUMAN Nucleoporin Nup43	14	5.74114	6.61367	5.94281	5.89557	6.61816	6.35336	6.27617	6.17329	6.0483	6.35525	1.05075	0.0714186	0.0639235	0.0299225
sp|P78540|ARGI2_HUMAN	ARG2	ARGI2_HUMAN Arginase-2, mitochondrial	5	5.65348	5.62426	6.2114	6.56045	6.50713	5.90082	6.69385	6.16773	6.0124	6.31738	1.05073	0.0713865	0.075577	0.0558645
sp|O75616|ERAL1_HUMAN	ERAL1	ERAL1_HUMAN GTPase Era, mitochondrial	11	5.96719	5.63953	6.55821	6.82981	6.53091	6.42331	6.8995	6.40611	6.24869	6.56496	1.05061	0.0712331	0.0868626	0.0349985
sp|Q10570|CPSF1_HUMAN	CPSF1	CPSF1_HUMAN Cleavage and polyadenylation specificity factor subunit 1	24	5.94805	5.65238	6.45914	6.42155	6.09108	6.38894	6.58013	6.65997	6.12028	6.43003	1.05061	0.0712278	0.0635746	0.0393416
sp|Q5SSJ5|HP1B3_HUMAN	HP1BP3	HP1B3_HUMAN Heterochromatin protein 1-binding protein 3	22	6.41083	6.08065	6.3613	6.15249	6.73	6.54283	6.67745	6.32035	6.25132	6.56766	1.0506	0.0712186	0.0255337	0.0278249
sp|Q86X40|LRC28_HUMAN	LRRC28	LRC28_HUMAN Leucine-rich repeat-containing protein 28	2	5.5683	6.19304	6.12134	6.76563	6.32501	5.82555	7.06126	6.6837	6.16208	6.47388	1.0506	0.0712138	0.0794726	0.0813232
sp|Q86UQ0-3|ZN589_HUMAN	ZNF589	ZN589_HUMAN Isoform 3 of Zinc finger protein 589	1	6.45475	6.197	5.89025	6.14416	5.9664	7.03283	6.61051	6.32443	6.17154	6.48354	1.05056	0.0711518	0.0375054	0.0695828
sp|Q16533|SNPC1_HUMAN	SNAPC1	SNPC1_HUMAN snRNA-activating protein complex subunit 1	5	6.00447	5.73754	5.98885	6.3632	5.7634	6.57095	6.63806	6.3394	6.02351	6.32795	1.05054	0.0711332	0.0427291	0.0628196
sp|P13807|GYS1_HUMAN	GYS1	GYS1_HUMAN Glycogen [starch] synthase, muscle	24	5.90934	5.97505	6.25921	6.32819	6.07042	6.40655	6.6441	6.58745	6.11795	6.42713	1.05054	0.0711269	0.0337752	0.0402179
sp|O43310-2|CTIF_HUMAN	CTIF	CTIF_HUMAN Isoform 2 of CBP80/20-dependent translation initiation factor	6	6.00107	6.39872	6.09061	6.53134	6.31238	6.51555	6.70991	6.74785	6.25544	6.57142	1.05051	0.0710955	0.0400741	0.030502
sp|O00178|GTPB1_HUMAN	GTPBP1	GTPB1_HUMAN GTP-binding protein 1	13	5.76346	5.86192	6.28071	6.29524	6.29214	6.21546	6.45891	6.45698	6.05033	6.35587	1.0505	0.0710758	0.0458484	0.0191873
sp|Q13363|CTBP1_HUMAN	CTBP1	CTBP1_HUMAN C-terminal-binding protein 1	6	5.97728	6.17075	6.18397	6.20886	6.47625	6.04147	6.54922	6.71261	6.13522	6.44489	1.05047	0.0710413	0.0173537	0.0444577
sp|P06493|CDK1_HUMAN	CDK1	CDK1_HUMAN Cyclin-dependent kinase 1	25	5.92279	5.56641	6.34972	6.63456	6.34881	6.00723	6.86463	6.48802	6.11837	6.42717	1.05047	0.0710368	0.0768286	0.0551969
sp|Q15554-3|TERF2_HUMAN	TERF2	TERF2_HUMAN Isoform 3 of Telomeric repeat-binding factor 2	16	5.84998	5.77238	6.34905	6.41945	6.0628	6.32906	6.87813	6.35165	6.09771	6.40541	1.05046	0.0710222	0.0547116	0.0532913
sp|Q9NR09|BIRC6_HUMAN	BIRC6	BIRC6_HUMAN Baculoviral IAP repeat-containing protein 6	49	6.05804	5.81988	6.44874	6.53472	6.19497	6.36363	6.86717	6.68938	6.21535	6.52879	1.05043	0.0709806	0.0539737	0.0467102
sp|P61923|COPZ1_HUMAN	COPZ1	COPZ1_HUMAN Coatomer subunit zeta-1	7	5.9462	6.00226	6.15536	6.30348	6.15345	6.36343	6.55576	6.56424	6.10182	6.40922	1.05038	0.070908	0.0263686	0.0302839
sp|O15084-1|ANR28_HUMAN	ANKRD28	ANR28_HUMAN Isoform 3 of Serine/threonine-protein phosphatase 6 regulatory ankyrin repeat subunit A	11	5.83479	5.79524	6.56943	6.54458	6.35958	6.16559	6.82986	6.63316	6.18601	6.49705	1.05028	0.0707751	0.0693197	0.0451416
sp|Q9BWH6|RPAP1_HUMAN	RPAP1	RPAP1_HUMAN RNA polymerase II-associated protein 1	16	5.86784	6.05732	6.66946	6.59812	6.16504	6.5639	6.68084	7.0492	6.29819	6.61475	1.05026	0.0707494	0.0629134	0.0550598
sp|Q7RTN6|STRAA_HUMAN	STRADA	STRAA_HUMAN STE20-related kinase adapter protein alpha	5	5.95637	6.02906	5.57706	6.62376	6.36089	6.37028	6.24322	6.4271	6.04656	6.35037	1.05025	0.070726	0.0715831	0.0121555
sp|P00846|ATP6_HUMAN	MT-ATP6	ATP6_HUMAN ATP synthase subunit a	2	5.12692	5.87822	5.95829	7.17128	5.29226	6.58756	6.41723	7.04975	6.03368	6.3367	1.05022	0.0706941	0.140182	0.117697
sp|O94826|TOM70_HUMAN	TOMM70A	TOM70_HUMAN Mitochondrial import receptor subunit TOM70	39	6.02211	5.87397	5.85646	6.32191	6.30239	5.92613	6.50794	6.54587	6.01861	6.32058	1.05017	0.0706266	0.0357922	0.0449152
sp|Q9H9E3|COG4_HUMAN	COG4	COG4_HUMAN Conserved oligomeric Golgi complex subunit 4	14	5.77819	6.06255	6.68723	6.49785	6.42944	6.40276	6.73344	6.71466	6.25645	6.57008	1.05013	0.0705644	0.0659129	0.0271372
sp|Q99755|PI51A_HUMAN	PIP5K1A	PI51A_HUMAN Phosphatidylinositol 4-phosphate 5-kinase type-1 alpha	8	6.04287	6.03685	5.93062	6.47587	6.24664	6.44299	6.34529	6.67746	6.12155	6.42809	1.05008	0.0704937	0.0394953	0.0287115
sp|Q96RQ1|ERGI2_HUMAN	ERGIC2	ERGI2_HUMAN Endoplasmic reticulum-Golgi intermediate compartment protein 2	5	6.26718	5.90891	6.42243	6.37966	6.40929	6.21601	7.08984	6.51349	6.24455	6.55716	1.05006	0.0704741	0.0373349	0.0573268
sp|P05423|RPC4_HUMAN	POLR3D	RPC4_HUMAN DNA-directed RNA polymerase III subunit RPC4	7	6.03952	5.96496	6.23864	6.32872	6.3478	6.35604	6.64837	6.44919	6.14296	6.45035	1.05004	0.0704435	0.0275693	0.0216718
sp|Q5VTL8|PR38B_HUMAN	PRPF38B	PR38B_HUMAN Pre-mRNA-splicing factor 38B	5	5.80375	5.88903	6.32576	6.4442	6.3092	6.67619	6.19223	6.50908	6.11568	6.42167	1.05003	0.0704356	0.0517705	0.033364
sp|O75326|SEM7A_HUMAN	SEMA7A	SEM7A_HUMAN Semaphorin-7A	1	5.73734	5.2912	5.01605	5.90184	6.3262	6.80293	4.37374	5.54149	5.48661	5.76109	1.05003	0.0704274	0.0740272	0.184182
sp|P78549|NTHL1_HUMAN	NTHL1	NTHL1_HUMAN Endonuclease III-like protein 1	1	5.51354	6.01847	6.01229	6.53107	5.59793	6.29918	6.81879	6.56386	6.01884	6.31994	1.05003	0.0704248	0.0690219	0.0832311
sp|P26639|SYTC_HUMAN	TARS	SYTC_HUMAN Threonine--tRNA ligase, cytoplasmic	90	5.88434	5.83353	6.03281	6.23658	6.00987	6.05232	6.53499	6.58964	5.99681	6.29671	1.05001	0.0704006	0.0301539	0.0489142
sp|P36406|TRI23_HUMAN	TRIM23	TRI23_HUMAN E3 ubiquitin-protein ligase TRIM23	5	6.1713	6.21851	5.83701	6.5087	6.50439	6.33613	6.36871	6.76288	6.18388	6.49303	1.04999	0.070379	0.0445008	0.0298932
sp|P51530|DNA2_HUMAN	DNA2	DNA2_HUMAN DNA replication ATP-dependent helicase/nuclease DNA2	5	5.84753	6.00381	6.65285	6.34157	6.47697	6.29814	6.85946	6.45299	6.21144	6.52189	1.04998	0.0703623	0.057847	0.0365837
sp|P68366|TBA4A_HUMAN	TUBA4A	TBA4A_HUMAN Tubulin alpha-4A chain	4	5.95833	6.136	6.34803	6.87884	6.74546	6.31761	6.79177	6.72651	6.3303	6.64534	1.04977	0.0700686	0.0630118	0.0331357
sp|P41162|ETV3_HUMAN	ETV3	ETV3_HUMAN ETS translocation variant 3	1	5.5707	5.50069	7.15581	7.02636	6.46583	6.60189	6.21274	7.22973	6.31339	6.62755	1.04976	0.0700602	0.142556	0.0652772
sp|Q9NX63|CHCH3_HUMAN	CHCHD3	CHCH3_HUMAN Coiled-coil-helix-coiled-coil-helix domain-containing protein 3, mitochondrial	7	6.19901	6.02258	6.21735	6.56418	6.38707	6.26369	6.66355	6.93241	6.25078	6.56168	1.04974	0.070029	0.0362573	0.0454742
sp|P98171-2|RHG04_HUMAN	ARHGAP4	RHG04_HUMAN Isoform 2 of Rho GTPase-activating protein 4	10	6.00504	5.87799	6.50451	6.48102	6.61042	6.13944	6.67147	6.68386	6.21714	6.5263	1.04973	0.0700137	0.0518897	0.0398227
sp|Q9C037|TRIM4_HUMAN	TRIM4	TRIM4_HUMAN Tripartite motif-containing protein 4	10	6.0137	5.79619	6.75759	6.5081	6.35	6.66323	6.55413	6.75508	6.26889	6.58061	1.04972	0.0700102	0.070418	0.0264879
sp|Q9UN37|VPS4A_HUMAN	VPS4A	VPS4A_HUMAN Vacuolar protein sorting-associated protein 4A	14	5.96084	5.80506	6.40311	6.65222	6.41066	6.21021	6.71152	6.72304	6.20531	6.51386	1.04972	0.0700095	0.0630227	0.0381929
sp|Q12979|ABR_HUMAN	ABR	ABR_HUMAN Active breakpoint cluster region-related protein	6	6.14272	5.95544	6.48761	6.50268	6.59974	6.44582	6.70533	6.58487	6.27211	6.58394	1.04972	0.0699998	0.0428429	0.0161844
sp|P21964|COMT_HUMAN	COMT	COMT_HUMAN Catechol O-methyltransferase	23	6.20792	6.1655	6.15921	6.36397	6.62297	6.21641	6.5076	6.78711	6.22415	6.53352	1.04971	0.0699842	0.0153741	0.0368122
sp|Q15257-2|PTPA_HUMAN	PPP2R4	PTPA_HUMAN Isoform 1 of Serine/threonine-protein phosphatase 2A activator	16	5.94896	6.29476	5.94731	6.19101	6.16982	6.27642	6.379	6.76866	6.09551	6.39848	1.0497	0.0699812	0.0287699	0.0408143
sp|P51580|TPMT_HUMAN	TPMT	TPMT_HUMAN Thiopurine S-methyltransferase	8	5.62339	6.0851	6.51021	6.4275	6.21252	6.06368	6.61518	6.97854	6.16155	6.46748	1.04965	0.0699104	0.065441	0.0638174
sp|Q9Y3L3|3BP1_HUMAN	SH3BP1	3BP1_HUMAN SH3 domain-binding protein 1	20	6.18473	5.80605	6.26405	6.18441	6.21698	6.61924	6.53232	6.2828	6.10981	6.41284	1.0496	0.0698348	0.033707	0.0301498
sp|P55039|DRG2_HUMAN	DRG2	DRG2_HUMAN Developmentally-regulated GTP-binding protein 2	17	5.7647	6.11997	5.96643	6.27265	6.00609	6.24328	6.40379	6.66701	6.03094	6.33004	1.0496	0.0698329	0.0359975	0.0438803
sp|O75695|XRP2_HUMAN	RP2	XRP2_HUMAN Protein XRP2	6	5.8395	6.00211	5.82276	6.11649	6.56204	5.92336	6.18696	6.28777	5.94521	6.24003	1.04959	0.0698246	0.0235369	0.0423052
sp|O75533|SF3B1_HUMAN	SF3B1	SF3B1_HUMAN Splicing factor 3B subunit 1	61	5.91402	5.82471	6.18102	6.47638	6.22799	6.13861	6.57059	6.66851	6.09903	6.40143	1.04958	0.0698127	0.0481381	0.040244
sp|A4D1E9|GTPBA_HUMAN	GTPBP10	GTPBA_HUMAN GTP-binding protein 10	16	6.08168	5.93078	6.26816	6.28234	6.29232	6.30496	6.52429	6.65843	6.14074	6.445	1.04955	0.0697678	0.0272264	0.0275761
sp|P03923|NU6M_HUMAN	MT-ND6	NU6M_HUMAN NADH-ubiquinone oxidoreductase chain 6	1	6.27535	5.77848	7.02335	5.98396	6.31894	5.79138	7.33862	6.85343	6.26529	6.57559	1.04953	0.0697408	0.0869781	0.101648
sp|O95822|DCMC_HUMAN	MLYCD	DCMC_HUMAN Malonyl-CoA decarboxylase, mitochondrial	7	5.56116	5.70786	6.55161	6.77846	5.9233	6.12521	6.89799	6.8703	6.14977	6.4542	1.0495	0.0697052	0.0983954	0.0779928
sp|Q9HC36|RMTL1_HUMAN	RNMTL1	RMTL1_HUMAN RNA methyltransferase-like protein 1	7	6.031	6.00831	6.34893	6.66797	6.71766	6.31708	6.5855	6.6746	6.26405	6.57371	1.04943	0.0696115	0.0496405	0.0273393
sp|Q96EK7|F120B_HUMAN	FAM120B	F120B_HUMAN Constitutive coactivator of peroxisome proliferator-activated receptor gamma	8	5.89388	6.29453	6.75555	6.43896	6.70467	6.60477	6.68997	6.63787	6.34573	6.65932	1.04942	0.0695887	0.0563382	0.00695308
sp|Q8N584|TT39C_HUMAN	TTC39C	TT39C_HUMAN Tetratricopeptide repeat protein 39C	6	6.10261	6.1506	6.58034	6.64127	6.62179	6.36181	6.78635	6.9627	6.3687	6.68316	1.04938	0.0695309	0.0441755	0.0382287
sp|O00308|WWP2_HUMAN	WWP2	WWP2_HUMAN NEDD4-like E3 ubiquitin-protein ligase WWP2	1	6.26461	5.50028	6.35634	6.36339	5.95403	6.63423	6.61102	6.49412	6.12115	6.42335	1.04937	0.069522	0.0680191	0.0496363
sp|Q14161|GIT2_HUMAN	GIT2	GIT2_HUMAN ARF GTPase-activating protein GIT2	9	5.80868	5.83879	6.27758	6.57087	6.28329	6.13599	6.67064	6.61491	6.12398	6.42621	1.04935	0.069498	0.0599272	0.0401798
sp|O43462|MBTP2_HUMAN	MBTPS2	MBTP2_HUMAN Membrane-bound transcription factor site-2 protease	1	6.17215	5.71126	6.068	6.63021	5.88616	6.51962	6.3841	7.00466	6.14541	6.44864	1.04934	0.0694857	0.0616221	0.0713299
sp|Q9H4E7|DEFI6_HUMAN	DEF6	DEFI6_HUMAN Differentially expressed in FDCP 6 homolog	8	5.78917	5.70567	6.49101	7.06676	6.32325	6.06939	6.85996	7.03616	6.26315	6.57219	1.04934	0.0694852	0.102366	0.0687716
sp|P57088|TMM33_HUMAN	TMEM33	TMM33_HUMAN Transmembrane protein 33	18	6.54172	6.27641	6.59849	6.81629	6.58378	6.4744	7.29839	7.16897	6.55823	6.88138	1.04928	0.069393	0.0338574	0.059964
sp|Q8NBM4|UBAC2_HUMAN	UBAC2	UBAC2_HUMAN Ubiquitin-associated domain-containing protein 2	5	5.78367	5.73588	7.13937	6.76002	6.16974	6.7601	6.68592	7.05559	6.35473	6.66784	1.04927	0.069387	0.110864	0.0552596
sp|Q9NRZ7-3|PLCC_HUMAN	AGPAT3	PLCC_HUMAN Isoform 3 of 1-acyl-sn-glycerol-3-phosphate acyltransferase gamma	4	6.01288	6.52109	6.03089	6.34257	6.66679	6.05273	6.67008	6.74493	6.22686	6.53363	1.04927	0.069381	0.0397886	0.0493793
sp|P25490|TYY1_HUMAN	YY1	TYY1_HUMAN Transcriptional repressor protein YY1	8	6.1999	5.84836	6.05883	6.38672	6.31869	6.35552	6.56907	6.45652	6.12345	6.42495	1.04924	0.0693399	0.0371208	0.0174891
sp|Q8N9N2-2|ASCC1_HUMAN	ASCC1	ASCC1_HUMAN Isoform 2 of Activating signal cointegrator 1 complex subunit 1	10	6.1271	6.02447	6.2743	6.21107	6.45121	6.22802	6.51958	6.65114	6.15923	6.46249	1.04924	0.0693384	0.017567	0.0273837
sp|Q9UPN4|AZI1_HUMAN	AZI1	AZI1_HUMAN 5-azacytidine-induced protein 1	4	6.02241	6.37458	6.54116	6.1173	6.11764	6.3879	6.87337	6.90981	6.26386	6.57218	1.04922	0.0693194	0.0378838	0.0586198
sp|Q7KZF4|SND1_HUMAN	SND1	SND1_HUMAN Staphylococcal nuclease domain-containing protein 1	59	5.97028	5.81793	6.25408	6.33388	6.21535	6.23066	6.643	6.48664	6.09404	6.39391	1.04921	0.0692994	0.0395974	0.032454
sp|Q8N8N7|PTGR2_HUMAN	PTGR2	PTGR2_HUMAN Prostaglandin reductase 2	13	5.41033	5.3503	5.80715	6.23374	5.40734	6.12456	6.09183	6.29883	5.70038	5.98064	1.04917	0.0692418	0.0718007	0.065687
sp|Q9NYI0|PSD3_HUMAN	PSD3	PSD3_HUMAN PH and SEC7 domain-containing protein 3	6	5.8333	6.42258	6.41141	6.21399	6.14036	6.69281	6.57443	6.69693	6.22032	6.52613	1.04916	0.0692395	0.0442464	0.0403577
sp|Q9Y3A6|TMED5_HUMAN	TMED5	TMED5_HUMAN Transmembrane emp24 domain-containing protein 5	7	5.7088	5.87054	6.34392	6.22371	5.90149	6.01225	6.62976	6.79038	6.03674	6.33347	1.04915	0.0692259	0.0491855	0.0698029
sp|P30039|PBLD_HUMAN	PBLD	PBLD_HUMAN Phenazine biosynthesis-like domain-containing protein	2	4.97298	6.17072	5.83733	6.98331	5.7774	6.41068	5.85235	7.10184	5.99108	6.28557	1.04915	0.0692257	0.138883	0.0975492
sp|O43913|ORC5_HUMAN	ORC5	ORC5_HUMAN Origin recognition complex subunit 5	7	5.86263	5.7115	6.76607	6.44658	6.2448	6.32416	7.02147	6.4141	6.1967	6.50113	1.04913	0.0691921	0.0798035	0.0544088
sp|Q9NPF5|DMAP1_HUMAN	DMAP1	DMAP1_HUMAN DNA methyltransferase 1-associated protein 1	9	5.86148	5.80483	6.32902	6.33371	6.13231	6.5054	6.4404	6.44524	6.08226	6.38084	1.04909	0.0691383	0.0474456	0.0263762
sp|O75396|SC22B_HUMAN	SEC22B	SC22B_HUMAN Vesicle-trafficking protein SEC22b	12	5.52064	6.25507	6.28059	6.71238	6.00073	6.50938	6.67044	6.80384	6.19217	6.4961	1.04908	0.0691282	0.0798456	0.0541101
sp|Q6XZF7|DNMBP_HUMAN	DNMBP	DNMBP_HUMAN Dynamin-binding protein	35	5.99618	5.87902	6.35958	6.43864	6.34403	6.11759	6.75696	6.66467	6.16836	6.47081	1.04903	0.0690611	0.044198	0.0455217
sp|P10809|CH60_HUMAN	HSPD1	CH60_HUMAN 60 kDa heat shock protein, mitochondrial	298	5.79046	5.87233	6.09311	6.36118	6.12022	5.96911	6.53328	6.67625	6.02927	6.32472	1.049	0.0690171	0.042383	0.0528624
sp|O75165|DJC13_HUMAN	DNAJC13	DJC13_HUMAN DnaJ homolog subfamily C member 13	29	6.06707	5.85764	6.52922	6.50135	6.35485	6.53366	6.72239	6.56714	6.23882	6.54451	1.049	0.069012	0.0530038	0.0230456
sp|Q9BTF0|THUM2_HUMAN	THUMPD2	THUM2_HUMAN THUMP domain-containing protein 2	2	6.59941	6.01953	5.89561	6.14703	6.47743	6.02733	6.51372	6.8512	6.1654	6.46742	1.04899	0.068997	0.0497958	0.0522984
sp|Q9BQ95|ECSIT_HUMAN	ECSIT	ECSIT_HUMAN Evolutionarily conserved signaling intermediate in Toll pathway, mitochondrial	4	5.77768	6.05732	5.99706	6.43834	5.90642	6.56741	6.22442	6.76094	6.0676	6.3648	1.04898	0.0689886	0.0452936	0.0593299
sp|Q8TDB6|DTX3L_HUMAN	DTX3L	DTX3L_HUMAN E3 ubiquitin-protein ligase DTX3L	1	5.76768	5.50137	6.76177	6.67762	6.316	6.63698	6.21402	6.7499	6.17711	6.47923	1.04891	0.0688892	0.103092	0.0393619
sp|O14908|GIPC1_HUMAN	GIPC1	GIPC1_HUMAN PDZ domain-containing protein GIPC1	17	5.72647	5.77861	6.32489	6.42523	6.06566	6.03487	6.77213	6.56862	6.0638	6.36032	1.0489	0.0688772	0.0597587	0.0578193
sp|Q6XUX3|DUSTY_HUMAN	DSTYK	DUSTY_HUMAN Dual serine/threonine and tyrosine protein kinase	1	5.31888	5.67031	5.60557	7.19677	6.44866	5.58272	6.63584	6.2871	5.94788	6.23858	1.04887	0.0688415	0.142316	0.0737147
sp|Q9HAV7|GRPE1_HUMAN	GRPEL1	GRPE1_HUMAN GrpE protein homolog 1, mitochondrial	22	5.97076	5.67688	5.84196	6.20891	6.07063	6.02743	6.16533	6.59308	5.92463	6.21412	1.04886	0.0688251	0.0378873	0.041699
sp|Q9UIA9|XPO7_HUMAN	XPO7	XPO7_HUMAN Exportin-7	30	6.2067	6.08132	6.74467	6.75524	6.39558	6.58162	7.16219	6.90734	6.44698	6.76168	1.04881	0.0687582	0.0548464	0.0503758
sp|P50416|CPT1A_HUMAN	CPT1A	CPT1A_HUMAN Carnitine O-palmitoyltransferase 1, liver isoform	22	5.87626	5.89924	6.8417	6.60638	6.33386	6.28603	6.98731	6.84758	6.30589	6.61369	1.04881	0.0687554	0.0780835	0.0538103
sp|Q6P6B7|ANR16_HUMAN	ANKRD16	ANR16_HUMAN Ankyrin repeat domain-containing protein 16	3	5.61728	5.40274	6.22672	7.08095	6.62619	6.41341	6.23593	6.23941	6.08192	6.37873	1.0488	0.0687429	0.123634	0.0289413
sp|Q96RR1|PEO1_HUMAN	PEO1	PEO1_HUMAN Twinkle protein, mitochondrial	5	6.3776	5.9464	6.25404	6.06522	6.16725	6.43186	6.8001	6.44575	6.16082	6.46124	1.04876	0.0686898	0.0311938	0.0401962
sp|Q16566|KCC4_HUMAN	CAMK4	KCC4_HUMAN Calcium/calmodulin-dependent protein kinase type IV	3	5.94629	6.05102	6.31895	6.32754	6.35657	5.98226	6.78495	6.72161	6.16095	6.46135	1.04876	0.0686822	0.0312045	0.0574208
sp|Q9NYU2|UGGG1_HUMAN	UGGT1	UGGG1_HUMAN UDP-glucose:glycoprotein glucosyltransferase 1	66	5.82522	6.01841	6.14143	6.31966	6.04796	6.33664	6.54809	6.55638	6.07618	6.37227	1.04873	0.0686422	0.0342408	0.0374945
sp|Q96KB5|TOPK_HUMAN	PBK	TOPK_HUMAN Lymphokine-activated killer T-cell-originated protein kinase	25	5.75063	5.82819	6.25771	6.71223	6.20383	5.92047	6.93673	6.68314	6.13719	6.43604	1.0487	0.0685956	0.0722661	0.0712855
sp|P43246|MSH2_HUMAN	MSH2	MSH2_HUMAN DNA mismatch repair protein Msh2	34	6.03654	5.93822	6.42407	6.45224	6.36431	6.20568	6.81316	6.67804	6.21277	6.5153	1.04869	0.068595	0.0424261	0.0428539
sp|O95071|UBR5_HUMAN	UBR5	UBR5_HUMAN E3 ubiquitin-protein ligase UBR5	48	6.04911	5.97828	6.37073	6.40025	6.44843	6.17856	6.77563	6.60324	6.19959	6.50146	1.04869	0.0685915	0.034991	0.0389728
sp|Q92610|ZN592_HUMAN	ZNF592	ZN592_HUMAN Zinc finger protein 592	2	5.79757	5.80239	6.47516	6.44547	7.08128	6.65696	5.81745	6.15882	6.13015	6.42863	1.04869	0.068589	0.062224	0.0863489
sp|P58004|SESN2_HUMAN	SESN2	SESN2_HUMAN Sestrin-2	1	5.57363	5.71681	6.5298	6.0157	6.22325	6.25575	6.88035	5.63696	5.95898	6.24908	1.04868	0.0685766	0.070946	0.0812769
sp|Q9H6T3|RPAP3_HUMAN	RPAP3	RPAP3_HUMAN RNA polymerase II-associated protein 3	24	6.00191	5.96137	6.36694	6.24049	6.37247	6.3151	6.43587	6.6431	6.14268	6.44164	1.04867	0.0685593	0.031532	0.0222119
sp|Q5T3F8|TM63B_HUMAN	TMEM63B	TM63B_HUMAN Transmembrane protein 63B	4	5.72926	5.96605	6.29065	6.45149	5.94838	6.30875	6.88901	6.48053	6.10936	6.40667	1.04866	0.0685523	0.0530338	0.0609691
sp|O75575|RPC9_HUMAN	CRCP	RPC9_HUMAN DNA-directed RNA polymerase III subunit RPC9	3	6.62239	6.49143	5.80671	5.5487	6.51414	6.65589	6.08327	6.4064	6.11731	6.41493	1.04865	0.0685356	0.0851963	0.0379689
sp|Q9Y4R8|TELO2_HUMAN	TELO2	TELO2_HUMAN Telomere length regulation protein TEL2 homolog	21	5.86185	5.94793	6.5768	6.53054	6.25806	6.39627	6.92666	6.5481	6.22928	6.53227	1.04864	0.0685196	0.0604712	0.0441463
sp|Q969G5|PRDBP_HUMAN	PRKCDBP	PRDBP_HUMAN Protein kinase C delta-binding protein	4	6.26186	5.72679	6.05569	6.15092	5.97196	6.10048	6.60453	6.69455	6.04881	6.34288	1.04862	0.0684855	0.038127	0.0567326
sp|Q9UHJ6|SHPK_HUMAN	SHPK	SHPK_HUMAN Sedoheptulokinase	7	5.77236	5.55313	6.78904	6.6877	5.93538	6.22834	6.84152	7.00217	6.20056	6.50185	1.04859	0.0684529	0.101409	0.077483
sp|Q9NP73-4|ALG13_HUMAN	ALG13	ALG13_HUMAN Isoform 4 of Putative bifunctional UDP-N-acetylglucosamine transferase and deubiquitinase ALG13	1	6.55774	5.90699	5.4832	6.93795	6.66881	6.6299	6.40273	6.39361	6.22147	6.52376	1.04859	0.0684488	0.104595	0.02237
sp|P46531|NOTC1_HUMAN	NOTCH1	NOTC1_HUMAN Neurogenic locus notch homolog protein 1	9	6.14482	6.15239	6.37321	6.45174	6.32208	6.18962	7.74391	6.08627	6.28054	6.58547	1.04855	0.0683978	0.0247929	0.118185
sp|Q6N069|NAA16_HUMAN	NAA16	NAA16_HUMAN N-alpha-acetyltransferase 16, NatA auxiliary subunit	12	5.81201	5.81557	6.46662	6.68979	6.21078	6.04593	6.82789	6.90101	6.196	6.4964	1.04848	0.0683045	0.0727314	0.0663928
sp|Q9Y673|ALG5_HUMAN	ALG5	ALG5_HUMAN Dolichyl-phosphate beta-glucosyltransferase	7	5.88539	6.36375	6.73278	6.77986	6.42968	6.38237	7.31128	6.88723	6.44045	6.75264	1.04847	0.0682913	0.0643089	0.0646414
sp|Q9UBQ6|EXTL2_HUMAN	EXTL2	EXTL2_HUMAN Exostosin-like 2	5	6.07358	6.02448	6.02818	6.03331	6.56281	6.15629	6.22559	6.38476	6.03989	6.33236	1.04842	0.0682222	0.00376689	0.028579
sp|P11388-4|TOP2A_HUMAN	TOP2A	TOP2A_HUMAN Isoform 4 of DNA topoisomerase 2-alpha	1	5.27445	6.87347	5.87456	6.27651	6.35203	5.99673	6.92685	6.19957	6.07475	6.3688	1.0484	0.068196	0.110804	0.0627261
sp|Q7Z2Z2|ETUD1_HUMAN	EFTUD1	ETUD1_HUMAN Elongation factor Tu GTP-binding domain-containing protein 1	18	5.95291	5.93358	6.35181	6.1757	6.23934	6.15368	6.70365	6.49899	6.1035	6.39891	1.0484	0.0681905	0.0325518	0.0391714
sp|P14735|IDE_HUMAN	IDE	IDE_HUMAN Insulin-degrading enzyme	41	5.82186	5.84299	6.5358	6.56115	6.28533	6.09797	6.75212	6.82469	6.19045	6.49003	1.04839	0.0681803	0.0668176	0.0545709
sp|Q9BTW9|TBCD_HUMAN	TBCD	TBCD_HUMAN Tubulin-specific chaperone D	25	6.19394	5.97268	6.48842	6.5822	6.55827	6.29855	6.88069	6.72064	6.30931	6.61454	1.04838	0.068158	0.0441878	0.0375538
sp|Q96L93-2|KI16B_HUMAN	KIF16B	KI16B_HUMAN Isoform 2 of Kinesin-like protein KIF16B	3	5.82963	5.65743	6.63086	6.66557	6.07669	6.54341	6.96631	6.39599	6.19587	6.4956	1.04838	0.0681553	0.0850922	0.0568618
sp|Q9Y4C2|F115A_HUMAN	FAM115A	F115A_HUMAN Protein FAM115A	14	6.17333	5.97442	6.49611	6.55996	6.36657	6.3949	6.92728	6.7341	6.30096	6.60571	1.04837	0.0681437	0.0437601	0.0411364
sp|P49754|VPS41_HUMAN	VPS41	VPS41_HUMAN Vacuolar protein sorting-associated protein 41 homolog	8	6.02418	5.84467	6.62791	6.46434	6.68255	6.29728	6.67065	6.51696	6.24028	6.54186	1.04833	0.0680913	0.0587823	0.0274613
sp|Q07955|SRSF1_HUMAN	SRSF1	SRSF1_HUMAN Serine/arginine-rich splicing factor 1	11	6.28829	6.06208	6.30994	6.11091	6.61411	6.47732	6.67747	6.19946	6.1928	6.49209	1.04833	0.06809	0.0201327	0.0326882
sp|Q9NV88|INT9_HUMAN	INTS9	INT9_HUMAN Integrator complex subunit 9	12	6.06858	5.90772	6.37389	6.52343	6.4804	6.20033	6.6223	6.77147	6.21841	6.51863	1.04828	0.0680231	0.0451221	0.0373099
sp|O60229|KALRN_HUMAN	KALRN	KALRN_HUMAN Kalirin	2	6.12715	5.39189	6.39155	6.37408	6.36195	6.3419	6.50373	6.24939	6.07117	6.36424	1.04827	0.0680148	0.0771959	0.0165177
sp|Q9NZQ3|SPN90_HUMAN	NCKIPSD	SPN90_HUMAN NCK-interacting protein with SH3 domain	9	5.42053	5.793	6.49107	6.63877	5.87947	6.62821	6.63037	6.38043	6.08584	6.37962	1.04827	0.0680135	0.0947888	0.0554061
sp|Q9Y4E8|UBP15_HUMAN	USP15	UBP15_HUMAN Ubiquitin carboxyl-terminal hydrolase 15	31	5.75843	5.77341	5.98349	6.44713	5.92933	6.04929	6.50559	6.63452	5.99062	6.27968	1.04825	0.0679875	0.0536203	0.054607
sp|O75143-5|ATG13_HUMAN	ATG13	ATG13_HUMAN Isoform 5 of Autophagy-related protein 13	6	5.73071	6.51282	6.17101	5.8592	5.99894	7.58441	5.82714	6.03412	6.06844	6.36115	1.04824	0.0679637	0.0575449	0.128987
sp|Q9ULX3|NOB1_HUMAN	NOB1	NOB1_HUMAN RNA-binding protein NOB1	13	6.10318	5.70434	6.35666	6.40256	6.29901	6.36421	6.6296	6.45809	6.14169	6.43773	1.0482	0.067917	0.052088	0.0223086
sp|Q6ZWJ1|STXB4_HUMAN	STXBP4	STXB4_HUMAN Syntaxin-binding protein 4	16	6.01909	5.96188	6.16537	6.68131	6.24904	6.18823	6.9076	6.67926	6.20691	6.50603	1.04819	0.0679022	0.0527907	0.0531192
sp|Q96A65|EXOC4_HUMAN	EXOC4	EXOC4_HUMAN Exocyst complex component 4	11	5.81697	5.4118	6.72948	6.72318	6.3458	6.261	6.82943	6.43452	6.17036	6.46769	1.04819	0.0678959	0.107442	0.0388628
sp|Q02809|PLOD1_HUMAN	PLOD1	PLOD1_HUMAN Procollagen-lysine,2-oxoglutarate 5-dioxygenase 1	30	5.85684	5.7785	6.27032	6.49951	6.32387	6.13771	6.50378	6.61568	6.10129	6.39526	1.04818	0.0678881	0.0560703	0.0327735
sp|Q96RU3|FNBP1_HUMAN	FNBP1	FNBP1_HUMAN Formin-binding protein 1	10	6.01315	5.7824	6.01309	6.56688	6.13344	6.06804	6.59623	6.75193	6.09388	6.38741	1.04817	0.06787	0.0547374	0.0529356
sp|Q96SB4-3|SRPK1_HUMAN	SRPK1	SRPK1_HUMAN Isoform 1 of SRSF protein kinase 1	17	5.97131	5.91807	6.17713	6.58854	6.26847	6.20614	6.71279	6.65344	6.16376	6.46021	1.0481	0.0677698	0.0493889	0.0402117
sp|Q8NFA0|UBP32_HUMAN	USP32	UBP32_HUMAN Ubiquitin carboxyl-terminal hydrolase 32	13	5.97851	5.74566	6.44568	6.42668	6.1459	6.22919	6.87267	6.53128	6.14913	6.44476	1.04808	0.0677437	0.0560898	0.0511793
sp|O60256|KPRB_HUMAN	PRPSAP2	KPRB_HUMAN Phosphoribosyl pyrophosphate synthase-associated protein 2	18	6.13	6.16975	6.02467	5.87534	6.39944	6.75262	6.01568	6.19442	6.04994	6.34054	1.04803	0.0676849	0.0217381	0.0498876
sp|P56378|68MP_HUMAN	MP68	68MP_HUMAN 6.8 kDa mitochondrial proteolipid	3	7.02075	7.01231	5.96188	6.20949	7.59975	6.40355	6.28572	7.17282	6.55111	6.86546	1.04798	0.0676176	0.0834758	0.0914708
sp|Q9H000|MKRN2_HUMAN	MKRN2	MKRN2_HUMAN Probable E3 ubiquitin-protein ligase makorin-2	5	6.35955	6.08611	6.40372	5.72549	6.6157	6.1967	6.36278	6.57865	6.14372	6.43846	1.04797	0.0676032	0.0508171	0.0304414
sp|O75153|CLU_HUMAN	CLUH	CLU_HUMAN Clustered mitochondria protein homolog	58	5.645	5.84353	6.11509	6.54028	5.91457	6.14488	6.48517	6.75664	6.03597	6.32532	1.04794	0.0675505	0.0641992	0.058649
sp|Q12860|CNTN1_HUMAN	CNTN1	CNTN1_HUMAN Contactin-1	1	6.31521	5.77311	5.59791	6.20938	6.12603	6.04637	6.86453	6.00365	5.9739	6.26014	1.04792	0.0675224	0.0574718	0.0648711
sp|P50750-2|CDK9_HUMAN	CDK9	CDK9_HUMAN Isoform 2 of Cyclin-dependent kinase 9	11	5.84431	5.50642	6.17125	6.53748	6.34814	5.94074	6.52357	6.39892	6.01487	6.30284	1.04788	0.0674703	0.0734279	0.0400459
sp|Q6IQ22|RAB12_HUMAN	RAB12	RAB12_HUMAN Ras-related protein Rab-12	11	6.16676	6.2585	6.10545	6.06546	6.48072	6.54676	6.38778	6.35685	6.14904	6.44303	1.04781	0.067377	0.0136649	0.013489
sp|O95834-3|EMAL2_HUMAN	EML2	EMAL2_HUMAN Isoform 3 of Echinoderm microtubule-associated protein-like 2	17	5.87917	5.77229	6.18879	6.40169	6.12528	6.13169	6.48563	6.65748	6.06048	6.35002	1.04777	0.0673279	0.0475193	0.041774
sp|Q93008|USP9X_HUMAN	USP9X	USP9X_HUMAN Probable ubiquitin carboxyl-terminal hydrolase FAF-X	58	6.09934	5.9518	6.76394	6.77333	6.38098	6.5353	6.96018	6.93431	6.3971	6.70269	1.04777	0.0673221	0.0677234	0.0431946
sp|Q92887|MRP2_HUMAN	ABCC2	MRP2_HUMAN Canalicular multispecific organic anion transporter 1	17	5.99715	6.04013	6.5196	6.21271	6.34557	6.39749	6.809	6.4005	6.1924	6.48814	1.04776	0.0673069	0.0383038	0.0331971
sp|Q68DK2|ZFY26_HUMAN	ZFYVE26	ZFY26_HUMAN Zinc finger FYVE domain-containing protein 26	3	6.11595	6.38435	6.85069	7.0667	6.39344	6.58495	7.73142	6.96881	6.60442	6.91966	1.04773	0.0672677	0.0654991	0.0855093
sp|Q8N1G2|CMTR1_HUMAN	CMTR1	CMTR1_HUMAN Cap-specific mRNA (nucleoside-2'-O-)-methyltransferase 1	14	5.87777	5.76573	6.47253	6.43758	6.23583	6.07937	6.79224	6.617	6.1384	6.43111	1.04768	0.0672045	0.060075	0.0513229
sp|O43670-2|ZN207_HUMAN	ZNF207	ZN207_HUMAN Isoform 2 of Zinc finger protein 207	1	6.95663	6.02827	5.6462	6.26001	7.50535	6.03635	6.03365	6.50242	6.22278	6.51944	1.04767	0.0671899	0.0885164	0.106332
sp|O15056|SYNJ2_HUMAN	SYNJ2	SYNJ2_HUMAN Synaptojanin-2	8	5.9705	5.95546	6.08597	6.4232	6.1646	6.24595	6.72194	6.46667	6.10878	6.39979	1.04764	0.0671397	0.0356157	0.0390361
sp|Q8WVV9|HNRLL_HUMAN	HNRNPLL	HNRLL_HUMAN Heterogeneous nuclear ribonucleoprotein L-like	10	5.69724	5.60581	6.84138	6.49316	6.41594	6.41624	6.45659	6.5218	6.1594	6.45264	1.04761	0.0671009	0.0981555	0.00773354
sp|Q9UKE5-4|TNIK_HUMAN	TNIK	TNIK_HUMAN Isoform 4 of TRAF2 and NCK-interacting protein kinase	23	6.19756	5.92947	6.19339	6.39788	6.4973	6.45107	6.58476	6.35961	6.17958	6.47318	1.04751	0.0669681	0.0310886	0.014497
sp|Q9Y692-2|GMEB1_HUMAN	GMEB1	GMEB1_HUMAN Isoform 2 of Glucocorticoid modulatory element-binding protein 1	7	6.22682	6.03875	6.1053	6.46347	6.57169	6.63659	6.32855	6.4771	6.20859	6.50348	1.0475	0.066948	0.0301057	0.0205659
sp|Q9BXK1|KLF16_HUMAN	KLF16	KLF16_HUMAN Krueppel-like factor 16	4	6.81492	6.6459	6.64885	5.46351	9.54474	5.74693	5.88234	5.61342	6.3933	6.69686	1.04748	0.0669246	0.0977382	0.283978
sp|O15270|SPTC2_HUMAN	SPTLC2	SPTC2_HUMAN Serine palmitoyltransferase 2	19	6.06382	5.82825	6.69301	6.35407	6.61887	6.51873	6.507	6.47838	6.23479	6.53074	1.04747	0.0669072	0.0599196	0.00936271
sp|Q643R3|LPCT4_HUMAN	LPCAT4	LPCT4_HUMAN Lysophospholipid acyltransferase LPCAT4	11	6.22452	6.08509	6.77434	6.95149	6.64623	6.45707	6.99472	7.1725	6.50886	6.81763	1.04744	0.0668654	0.0643828	0.0476555
sp|P06744-2|G6PI_HUMAN	GPI	G6PI_HUMAN Isoform 2 of Glucose-6-phosphate isomerase	60	6.25039	6.12177	5.98577	5.98386	6.31269	6.44336	6.2888	6.45161	6.08545	6.37411	1.04744	0.0668617	0.0209542	0.0133895
sp|Q7Z3U7|MON2_HUMAN	MON2	MON2_HUMAN Protein MON2 homolog	16	6.18941	6.24747	6.47699	6.81533	6.43784	6.58064	7.09233	6.83883	6.4323	6.73741	1.04743	0.0668594	0.0441429	0.0428957
sp|P52739|ZN131_HUMAN	ZNF131	ZN131_HUMAN Zinc finger protein 131	3	6.15908	6.14657	6.3743	6.20524	5.82228	5.97089	7.07737	7.19295	6.2213	6.51587	1.04735	0.0667429	0.0168897	0.110378
sp|A2RUB1|CQ104_HUMAN	C17orf104	CQ104_HUMAN Uncharacterized protein C17orf104	1	5.9039	6.37949	5.81037	7.03026	5.67817	6.99177	6.08729	7.55571	6.28101	6.57824	1.04732	0.0667051	0.0888724	0.129515
sp|Q9BZ23|PANK2_HUMAN	PANK2	PANK2_HUMAN Pantothenate kinase 2, mitochondrial	5	6.182	5.88916	5.92613	6.40858	5.81791	6.74867	6.32098	6.67315	6.10147	6.39018	1.04732	0.0666997	0.0397673	0.0664465
sp|Q147X3|NAA30_HUMAN	NAA30	NAA30_HUMAN N-alpha-acetyltransferase 30	7	5.70943	6.20293	6.25572	6.3888	6.1766	6.45882	6.64153	6.44034	6.13922	6.42932	1.04725	0.0666113	0.0483787	0.0297685
sp|P10746|HEM4_HUMAN	UROS	HEM4_HUMAN Uroporphyrinogen-III synthase	2	5.68088	5.90582	6.10077	6.20579	5.98145	6.16782	6.85051	6.02247	5.97332	6.25556	1.04725	0.0666078	0.0387058	0.0646803
sp|Q29RF7|PDS5A_HUMAN	PDS5A	PDS5A_HUMAN Sister chromatid cohesion protein PDS5 homolog A	45	6.0327	5.92219	6.67446	6.41154	6.43466	6.42661	6.75442	6.60767	6.26022	6.55584	1.04722	0.0665667	0.0553752	0.0238765
sp|Q13325|IFIT5_HUMAN	IFIT5	IFIT5_HUMAN Interferon-induced protein with tetratricopeptide repeats 5	8	5.98635	5.91399	6.31172	6.40428	6.41596	6.22841	6.51202	6.62179	6.15409	6.44455	1.0472	0.0665341	0.0390466	0.0258875
sp|Q16891|IMMT_HUMAN	IMMT	IMMT_HUMAN Mitochondrial inner membrane protein	44	5.97042	5.76397	6.50377	6.54391	6.28913	6.1578	6.83518	6.66899	6.19552	6.48778	1.04717	0.066499	0.0627414	0.048894
sp|Q96S38|KS6C1_HUMAN	RPS6KC1	KS6C1_HUMAN Ribosomal protein S6 kinase delta-1	2	6.08663	5.73335	6.3242	6.52122	6.61347	5.69565	6.62205	6.89736	6.16635	6.45713	1.04716	0.0664769	0.0549703	0.0812277
sp|Q9UBB4|ATX10_HUMAN	ATXN10	ATX10_HUMAN Ataxin-10	18	6.15375	5.99709	6.43065	6.35161	6.44816	6.0059	6.73399	6.92045	6.23327	6.52712	1.04714	0.0664573	0.0314195	0.0609889
sp|Q9Y6V7|DDX49_HUMAN	DDX49	DDX49_HUMAN Probable ATP-dependent RNA helicase DDX49	8	5.94456	5.94827	6.41306	6.23449	6.53015	6.27292	6.65501	6.23753	6.13509	6.4239	1.04707	0.0663643	0.037448	0.0314216
sp|Q6P0Q8|MAST2_HUMAN	MAST2	MAST2_HUMAN Microtubule-associated serine/threonine-protein kinase 2	3	6.28767	6.23912	6.71573	5.6145	5.54412	6.72314	6.90814	6.85144	6.21425	6.50671	1.04706	0.0663468	0.0729895	0.0993399
sp|O60443|DFNA5_HUMAN	DFNA5	DFNA5_HUMAN Non-syndromic hearing impairment protein 5	6	5.5357	5.61486	6.38717	6.75647	6.07714	6.13905	6.49616	6.72465	6.07355	6.35925	1.04704	0.0663166	0.0980737	0.0480698
sp|P46063|RECQ1_HUMAN	RECQL	RECQ1_HUMAN ATP-dependent DNA helicase Q1	21	6.03829	5.68402	6.49671	6.49352	6.35396	6.36306	6.7037	6.45412	6.17814	6.46871	1.04703	0.0663066	0.0637018	0.025207
sp|Q96F07|CYFP2_HUMAN	CYFIP2	CYFP2_HUMAN Cytoplasmic FMR1-interacting protein 2	31	5.93346	5.9484	6.40264	6.34294	6.2287	6.20212	6.78237	6.57174	6.15686	6.44623	1.047	0.0662615	0.0407021	0.0434779
sp|Q9UHB7|AFF4_HUMAN	AFF4	AFF4_HUMAN AF4/FMR2 family member 4	1	6.33946	5.86438	5.83993	5.90595	6.43975	7.10256	5.50762	6.02528	5.98743	6.2688	1.04699	0.066253	0.03946	0.107526
sp|A5PLN9-5|TPC13_HUMAN	TRAPPC13	TPC13_HUMAN Isoform 4 of Trafficking protein particle complex subunit 13	5	5.63815	5.62577	6.52105	6.68647	6.11464	6.11594	6.55831	6.83074	6.11786	6.40491	1.04692	0.0661506	0.0923756	0.0550252
sp|Q5JPE7|NOMO2_HUMAN	NOMO2	NOMO2_HUMAN Nodal modulator 2	52	5.85582	6.05844	6.24393	6.38248	6.14128	6.30022	6.56173	6.68763	6.13517	6.42272	1.04687	0.0660805	0.0372773	0.0385296
sp|Q93015-2|NAT6_HUMAN	NAT6	NAT6_HUMAN Isoform 2 of N-acetyltransferase 6	2	5.92666	6.12822	6.24597	6.19909	5.87642	6.30809	6.75271	6.71068	6.12499	6.41197	1.04686	0.0660625	0.0229875	0.0638563
sp|Q9Y6X3|SCC4_HUMAN	MAU2	SCC4_HUMAN MAU2 chromatid cohesion factor homolog	5	5.69984	5.98006	6.35622	6.17836	5.94825	6.2101	6.68447	6.50536	6.05362	6.33704	1.04682	0.0660121	0.0464983	0.05124
sp|Q9Y2L5|TPPC8_HUMAN	TRAPPC8	TPPC8_HUMAN Trafficking protein particle complex subunit 8	19	6.0691	5.99461	6.31344	6.57918	6.27704	6.52047	6.60959	6.7166	6.23908	6.53092	1.04678	0.0659535	0.0423916	0.0286771
sp|Q14680|MELK_HUMAN	MELK	MELK_HUMAN Maternal embryonic leucine zipper kinase	5	5.77154	5.95398	7.38427	6.70536	6.74711	6.43427	7.10045	6.74074	6.45379	6.75564	1.04677	0.0659469	0.114716	0.0403094
sp|Q15155|NOMO1_HUMAN	NOMO1	NOMO1_HUMAN Nodal modulator 1	1	5.45021	6.55944	6.06423	6.9284	5.94486	6.65622	5.96297	7.60696	6.25057	6.54275	1.04674	0.0659099	0.102447	0.119667
sp|Q9Y485|DMXL1_HUMAN	DMXL1	DMXL1_HUMAN DmX-like protein 1	7	6.10582	5.89157	6.50712	6.33195	6.49493	6.21748	6.54629	6.73735	6.20911	6.49901	1.04669	0.0658329	0.0431551	0.0330392
sp|P19525|E2AK2_HUMAN	EIF2AK2	E2AK2_HUMAN Interferon-induced, double-stranded RNA-activated protein kinase	13	6.12941	5.84225	6.51301	6.23992	6.57494	6.27783	6.56135	6.46381	6.18115	6.46948	1.04665	0.0657756	0.0449039	0.0211795
sp|Q13753|LAMC2_HUMAN	LAMC2	LAMC2_HUMAN Laminin subunit gamma-2	1	6.19415	6.14204	5.98515	5.56459	6.21562	5.68501	6.1615	6.93796	5.97148	6.25002	1.04665	0.0657722	0.0477996	0.0827016
sp|Q86SF2|GALT7_HUMAN	GALNT7	GALT7_HUMAN N-acetylgalactosaminyltransferase 7	27	5.76058	5.94425	5.89115	6.31008	5.98433	6.19842	6.40912	6.42865	5.97652	6.25513	1.04662	0.0657354	0.0393854	0.0333268
sp|O00410-3|IPO5_HUMAN	IPO5	IPO5_HUMAN Isoform 3 of Importin-5	92	5.93882	6.05476	6.20884	6.27791	6.13302	6.29367	6.54363	6.65072	6.12008	6.40526	1.0466	0.065706	0.0249433	0.0367206
sp|Q14667|K0100_HUMAN	KIAA0100	K0100_HUMAN UPF0378 protein KIAA0100	3	6.18585	5.40439	5.88526	6.99554	6.3946	6.11003	6.50197	6.6041	6.11776	6.40267	1.04657	0.0656713	0.109166	0.0332711
sp|Q8WYA6|CTBL1_HUMAN	CTNNBL1	CTBL1_HUMAN Beta-catenin-like protein 1	13	6.16462	6.03598	6.24794	6.37301	6.59242	6.22943	6.57655	6.57889	6.20539	6.49432	1.04656	0.0656577	0.0228411	0.0272135
sp|P11310-2|ACADM_HUMAN	ACADM	ACADM_HUMAN Isoform 2 of Medium-chain specific acyl-CoA dehydrogenase, mitochondrial	20	6.01386	6.34125	5.88209	5.96737	6.38774	6.50069	6.04394	6.39889	6.05114	6.33282	1.04655	0.0656394	0.0332095	0.0314514
sp|O75592|MYCB2_HUMAN	MYCBP2	MYCB2_HUMAN Probable E3 ubiquitin-protein ligase MYCBP2	12	5.95444	6.01566	6.49221	6.25858	6.21751	6.55468	6.88412	6.21486	6.18022	6.46779	1.04653	0.0656146	0.0398029	0.0494996
sp|Q96EK9|KTI12_HUMAN	KTI12	KTI12_HUMAN Protein KTI12 homolog	5	5.8614	6.08163	5.97187	5.81147	6.34605	6.19965	6.11076	6.17345	5.93159	6.20748	1.04651	0.0655876	0.0202984	0.0160493
sp|Q96MH6|TMM68_HUMAN	TMEM68	TMM68_HUMAN Transmembrane protein 68	6	5.66067	6.03067	6.53719	6.84236	6.88094	6.2003	6.51199	6.64313	6.26772	6.55909	1.04649	0.0655544	0.0837955	0.0432656
tr|F8VRH0|F8VRH0_HUMAN	PCBP2	F8VRH0_HUMAN Poly(rC)-binding protein 2 (Fragment)	2	6.33823	6.95812	5.53999	6.65478	6.55276	7.28637	7.01094	5.8239	6.37278	6.66849	1.0464	0.0654378	0.0957445	0.0958554
sp|Q9Y676|RT18B_HUMAN	MRPS18B	RT18B_HUMAN 28S ribosomal protein S18b, mitochondrial	8	5.73304	5.68315	6.57416	6.34065	6.31528	5.87296	6.5538	6.71794	6.08275	6.36499	1.0464	0.0654357	0.0729047	0.0577105
sp|P31930|QCR1_HUMAN	UQCRC1	QCR1_HUMAN Cytochrome b-c1 complex subunit 1, mitochondrial	22	6.07015	5.86096	6.33775	6.71925	6.30569	5.96765	6.71371	7.16049	6.24703	6.53688	1.0464	0.0654334	0.05929	0.0788804
sp|Q00403|TF2B_HUMAN	GTF2B	TF2B_HUMAN Transcription initiation factor IIB	13	6.0214	6.02977	6.40376	6.42478	6.37555	6.28352	6.6551	6.71921	6.21993	6.50835	1.04637	0.065393	0.0361093	0.0324949
sp|Q99797|MIPEP_HUMAN	MIPEP	MIPEP_HUMAN Mitochondrial intermediate peptidase	28	5.79851	5.84502	6.25281	6.47557	6.20273	6.0287	6.6054	6.66518	6.09298	6.3755	1.04637	0.0653916	0.0536123	0.0485044
sp|Q9GZN8-2|CT027_HUMAN	C20orf27	CT027_HUMAN Isoform 2 of UPF0687 protein C20orf27	7	6.08195	5.90825	5.92004	6.2777	6.43332	6.48333	6.07877	6.31377	6.04699	6.3273	1.04636	0.0653734	0.0286137	0.0284973
sp|Q9BRX5|PSF3_HUMAN	GINS3	PSF3_HUMAN DNA replication complex GINS protein PSF3	13	5.79811	5.85836	6.30706	6.23379	5.87413	6.29138	6.67468	6.47735	6.04933	6.32939	1.0463	0.06529	0.0426856	0.0539514
sp|Q7Z6M4|MTER2_HUMAN	MTERFD2	MTER2_HUMAN mTERF domain-containing protein 2	4	6.21201	5.82225	6.59606	6.40489	6.68811	6.16783	6.45569	6.88243	6.2588	6.54852	1.04629	0.0652811	0.0528186	0.0470279
sp|Q96NU0|CNT3B_HUMAN	CNTNAP3B	CNT3B_HUMAN Contactin-associated protein-like 3B	8	6.12868	6.19708	6.07099	5.98119	6.51553	6.28427	6.25922	6.44677	6.09448	6.37645	1.04627	0.0652486	0.0150034	0.0195307
sp|Q9Y371-2|SHLB1_HUMAN	SH3GLB1	SHLB1_HUMAN Isoform 2 of Endophilin-B1	7	6.02856	5.93527	5.94065	6.33649	6.21716	6.2632	6.34657	6.53507	6.06024	6.3405	1.04625	0.0652211	0.0311976	0.0221332
sp|P0C024|NUDT7_HUMAN	NUDT7	NUDT7_HUMAN Peroxisomal coenzyme A diphosphatase NUDT7	2	6.16923	6.20719	6.48527	5.54361	5.56043	6.75515	6.59183	6.62616	6.10133	6.38339	1.04623	0.0652008	0.0651676	0.0866512
sp|Q9NUW8|TYDP1_HUMAN	TDP1	TYDP1_HUMAN Tyrosyl-DNA phosphodiesterase 1	3	5.72053	6.09843	6.26046	6.63874	6.0154	6.10182	6.82777	6.91443	6.17954	6.46486	1.04617	0.0651186	0.0615983	0.0729707
sp|Q8NBA8|DTWD2_HUMAN	DTWD2	DTWD2_HUMAN DTW domain-containing protein 2	3	5.86715	6.13345	6.63853	6.66655	6.2781	6.79199	6.9362	6.46667	6.32642	6.61824	1.04613	0.0650583	0.0619809	0.0453256
sp|Q9UIW2|PLXA1_HUMAN	PLXNA1	PLXA1_HUMAN Plexin-A1	21	5.65635	5.6204	6.60533	6.37552	6.10553	6.09572	6.60588	6.5693	6.0644	6.34411	1.04612	0.0650523	0.0826154	0.0443836
sp|P30043|BLVRB_HUMAN	BLVRB	BLVRB_HUMAN Flavin reductase (NADPH)	17	5.43549	5.68731	5.85195	6.48938	5.6614	6.15189	6.32825	6.4043	5.86603	6.13646	1.0461	0.0650216	0.0766224	0.0544104
sp|Q9H1I8|ASCC2_HUMAN	ASCC2	ASCC2_HUMAN Activating signal cointegrator 1 complex subunit 2	10	5.94295	5.84048	6.08528	6.3632	6.32412	6.17172	6.46693	6.38613	6.05798	6.33723	1.0461	0.065015	0.0374538	0.0197045
sp|Q92989|CLP1_HUMAN	CLP1	CLP1_HUMAN Polyribonucleotide 5'-hydroxyl-kinase Clp1	9	5.58914	5.95623	6.49224	6.40598	6.02688	6.12342	6.87319	6.54561	6.1109	6.39228	1.04605	0.0649452	0.0686939	0.0612971
sp|Q9UPW5|CBPC1_HUMAN	AGTPBP1	CBPC1_HUMAN Cytosolic carboxypeptidase 1	7	5.71621	5.73666	6.08996	6.72796	6.2864	6.11439	6.44884	6.5363	6.0677	6.34648	1.04595	0.064808	0.0778599	0.0293353
sp|Q9NYK5|RM39_HUMAN	MRPL39	RM39_HUMAN 39S ribosomal protein L39, mitochondrial	19	5.75367	5.79825	5.92013	6.23609	5.84574	6.21618	6.31145	6.42391	5.92704	6.19932	1.04594	0.0647994	0.0367331	0.0404148
sp|Q9P266|JCAD_HUMAN	KIAA1462	JCAD_HUMAN Junctional protein associated with coronary artery disease	2	5.94794	6.51576	6.10217	6.2551	6.45642	6.67614	6.36429	6.46416	6.20524	6.49025	1.04593	0.064787	0.0390041	0.0203332
sp|Q9Y3Z3|SAMH1_HUMAN	SAMHD1	SAMH1_HUMAN Deoxynucleoside triphosphate triphosphohydrolase SAMHD1	23	6.02471	6.02236	6.16609	6.35244	6.41385	6.19922	6.56092	6.51895	6.1414	6.42324	1.04589	0.0647325	0.0253886	0.025166
sp|P18031|PTN1_HUMAN	PTPN1	PTN1_HUMAN Tyrosine-protein phosphatase non-receptor type 1	31	6.03082	5.92761	6.40568	6.525	6.46124	6.22124	6.67284	6.67494	6.22228	6.50756	1.04585	0.0646751	0.0462788	0.0331316
sp|Q92625|ANS1A_HUMAN	ANKS1A	ANS1A_HUMAN Ankyrin repeat and SAM domain-containing protein 1A	18	5.63738	6.18519	6.3976	6.63908	6.34687	6.3066	6.77598	6.56825	6.21481	6.49942	1.0458	0.0646012	0.0687528	0.0334356
sp|Q8NEN9|PDZD8_HUMAN	PDZD8	PDZD8_HUMAN PDZ domain-containing protein 8	28	6.1645	6.04482	6.26784	6.52206	6.23311	6.2331	6.90084	6.77694	6.2498	6.536	1.04579	0.0645963	0.0324964	0.0540681
sp|O14640|DVL1_HUMAN	DVL1	DVL1_HUMAN Segment polarity protein dishevelled homolog DVL-1	3	5.30357	5.87646	6.27699	7.01303	6.16207	6.46905	6.65954	6.29971	6.11751	6.39759	1.04578	0.064584	0.117422	0.0336184
sp|P00387-3|NB5R3_HUMAN	CYB5R3	NB5R3_HUMAN Isoform 3 of NADH-cytochrome b5 reductase 3	25	5.87381	5.97461	6.11681	6.24009	6.24497	5.95051	6.52749	6.58962	6.05133	6.32815	1.04574	0.064531	0.0265294	0.0463089
sp|Q08AM6|VAC14_HUMAN	VAC14	VAC14_HUMAN Protein VAC14 homolog	10	6.00067	5.94231	6.40558	6.45422	5.97067	6.28814	6.89347	6.78485	6.20069	6.48428	1.04573	0.064517	0.0429749	0.0666329
tr|E9PAL9|E9PAL9_HUMAN	NT5DC2	E9PAL9_HUMAN 5'-nucleotidase domain-containing protein 2	19	5.82739	5.84986	6.43033	6.61828	6.18174	6.14844	6.74266	6.78263	6.18146	6.46387	1.04569	0.0644488	0.0652514	0.0534744
sp|Q9Y2S2|CRYL1_HUMAN	CRYL1	CRYL1_HUMAN Lambda-crystallin homolog	4	5.93497	5.87144	6.28509	6.46499	6.20614	5.90655	6.91239	6.6525	6.13912	6.4194	1.04565	0.0644049	0.0461516	0.0700059
sp|Q9C0C7-5|AMRA1_HUMAN	AMBRA1	AMRA1_HUMAN Isoform 5 of Activating molecule in BECN1-regulated autophagy protein 1	7	5.91145	5.7425	6.5871	6.52757	6.06606	6.23188	6.85953	6.74121	6.19216	6.47467	1.04562	0.0643651	0.0691145	0.0594889
sp|Q9UNA1|RHG26_HUMAN	ARHGAP26	RHG26_HUMAN Rho GTPase-activating protein 26	9	5.93418	6.5061	6.20679	6.309	6.28202	6.40954	6.83154	6.57121	6.23902	6.52358	1.04561	0.0643445	0.0381766	0.0363252
sp|Q9BSB4|ATGA1_HUMAN	ATG101	ATGA1_HUMAN Autophagy-related protein 101	4	6.23072	6.09335	6.23259	6.32438	6.45478	6.51716	6.4131	6.63079	6.22026	6.50396	1.04561	0.0643429	0.0153103	0.0145685
sp|O15397|IPO8_HUMAN	IPO8	IPO8_HUMAN Importin-8	12	6.07606	5.94119	6.59879	6.55988	6.19217	6.46835	6.7757	6.88666	6.29398	6.58072	1.04556	0.0642728	0.0531374	0.0476689
sp|Q9NS91|RAD18_HUMAN	RAD18	RAD18_HUMAN E3 ubiquitin-protein ligase RAD18	10	6.07787	6.2178	6.35081	6.23642	6.60738	6.19202	6.70779	6.50867	6.22072	6.50397	1.04553	0.0642368	0.017993	0.0343309
sp|P08559-4|ODPA_HUMAN	PDHA1	ODPA_HUMAN Isoform 4 of Pyruvate dehydrogenase E1 component subunit alpha, somatic form, mitochondrial	26	5.82175	5.97087	6.21287	6.48483	6.16102	6.30376	6.64046	6.49997	6.12258	6.4013	1.04552	0.0642258	0.0474212	0.0330383
sp|Q9P000|COMD9_HUMAN	COMMD9	COMD9_HUMAN COMM domain-containing protein 9	9	6.38132	6.37115	5.85181	6.24399	6.39642	7.05802	6.21282	6.31133	6.21207	6.49465	1.04549	0.0641777	0.0399489	0.0589718
sp|Q9Y2H2|SAC2_HUMAN	INPP5F	SAC2_HUMAN Phosphatidylinositide phosphatase SAC2	9	6.21297	5.88974	6.13044	6.58531	6.51256	6.33939	6.52446	6.5706	6.20462	6.48675	1.04547	0.0641547	0.046493	0.0156288
sp|O14617-5|AP3D1_HUMAN	AP3D1	AP3D1_HUMAN Isoform 5 of AP-3 complex subunit delta-1	31	6.29767	5.92435	6.44656	6.46601	6.52977	6.39003	6.83011	6.5273	6.28365	6.5693	1.04546	0.0641379	0.0399539	0.0282723
sp|O95486|SC24A_HUMAN	SEC24A	SC24A_HUMAN Protein transport protein Sec24A	19	5.9468	5.94445	6.34282	6.50835	6.30716	6.2682	6.51417	6.77751	6.1856	6.46676	1.04545	0.0641284	0.0461115	0.0361237
sp|Q9UHD2|TBK1_HUMAN	TBK1	TBK1_HUMAN Serine/threonine-protein kinase TBK1	23	5.99927	5.98744	6.24948	6.381	6.31893	6.30049	6.54564	6.57058	6.1543	6.43391	1.04543	0.0641016	0.0314417	0.022377
sp|Q9BVA0|KTNB1_HUMAN	KATNB1	KTNB1_HUMAN Katanin p80 WD40 repeat-containing subunit B1	9	6.15366	6.22635	6.49996	6.43631	6.35046	6.42663	7.1073	6.58188	6.32907	6.61657	1.04542	0.0640895	0.0261258	0.0515423
sp|Q9H8V3-3|ECT2_HUMAN	ECT2	ECT2_HUMAN Isoform 3 of Protein ECT2	9	5.8989	5.95654	6.66205	6.22261	6.39495	6.49138	6.65612	6.32072	6.18503	6.46579	1.04539	0.0640478	0.0562437	0.0224024
sp|Q9BRR3|TM246_HUMAN	TMEM246	TM246_HUMAN Transmembrane protein 246	2	5.20379	6.46613	7.03121	6.53609	6.20849	6.70052	7.07992	6.39385	6.30931	6.5957	1.04539	0.0640436	0.123428	0.0578079
tr|A6PVV8|A6PVV8_HUMAN	PI4KB	A6PVV8_HUMAN Phosphatidylinositol 4-kinase beta (Fragment)	1	4.93937	6.54394	6.30692	5.53346	6.07697	6.10675	6.76015	5.4373	5.83092	6.09529	1.04534	0.0639713	0.12596	0.0886262
sp|Q6IBS0|TWF2_HUMAN	TWF2	TWF2_HUMAN Twinfilin-2	29	5.99569	5.95302	6.02552	6.21488	6.28107	5.99332	6.48612	6.52505	6.04728	6.32139	1.04533	0.063956	0.0191207	0.0385192
sp|P50616|TOB1_HUMAN	TOB1	TOB1_HUMAN Protein Tob1	2	6.35745	5.28924	5.84414	7.22057	7.00774	6.108	6.27016	6.44559	6.17785	6.45787	1.04533	0.0639541	0.132841	0.0606458
sp|Q9NWK9|BCD1_HUMAN	ZNHIT6	BCD1_HUMAN Box C/D snoRNA protein 1	4	6.15721	5.64928	6.3335	6.40837	6.82729	6.39445	6.15704	6.2822	6.13709	6.41524	1.04532	0.0639496	0.0556982	0.045409
sp|Q9UKA4|AKA11_HUMAN	AKAP11	AKA11_HUMAN A-kinase anchor protein 11	8	5.98613	5.95023	6.44685	6.45522	6.38999	6.17964	6.81551	6.57827	6.20961	6.49085	1.04529	0.0639059	0.0449597	0.0417272
sp|Q9NXF7|DCA16_HUMAN	DCAF16	DCA16_HUMAN DDB1- and CUL4-associated factor 16	2	6.24435	5.98424	6.41526	6.87461	6.98695	7.05979	6.55506	6.07184	6.37962	6.66841	1.04527	0.0638734	0.0587136	0.0683592
sp|Q8N766|EMC1_HUMAN	EMC1	EMC1_HUMAN ER membrane protein complex subunit 1	25	5.94057	6.08558	6.35415	6.37059	6.26489	6.3331	6.59248	6.6803	6.18772	6.46769	1.04525	0.0638426	0.0339838	0.0309252
sp|P06737|PYGL_HUMAN	PYGL	PYGL_HUMAN Glycogen phosphorylase, liver form	68	6.03392	5.9299	6.09995	6.17378	6.3559	6.23289	6.41684	6.32854	6.05939	6.33354	1.04524	0.0638407	0.0170835	0.0120915
sp|Q8NDB2|BANK1_HUMAN	BANK1	BANK1_HUMAN B-cell scaffold protein with ankyrin repeats	1	6.94888	6.42956	6.42155	5.10035	6.35356	6.36108	6.0859	7.22627	6.22508	6.5067	1.04524	0.0638331	0.126805	0.0763046
sp|P27707|DCK_HUMAN	DCK	DCK_HUMAN Deoxycytidine kinase	12	6.05817	5.9647	5.64245	6.17509	5.75719	6.55769	6.40152	6.20207	5.9601	6.22962	1.04522	0.0638064	0.0383535	0.0556941
sp|Q5XKP0|QIL1_HUMAN	QIL1	QIL1_HUMAN Protein QIL1	3	6.35634	5.75593	6.26298	6.48651	6.46796	5.91933	6.75188	6.84616	6.21544	6.49633	1.04519	0.063769	0.0514462	0.0641749
[truncated: 6,302 more rows]

## Sheet: Filtered dataset - solvent-PISA
Uniprot Id	Gene Symbol	Description	Number of peptides	Veh_1	Veh_2	Veh_3	Veh_4	SCIO469_1	SCIO469_2	SCIO469_3	SCIO469_4	Average (Veh)	Average (SCIO469)	fold change (SCIO469/Veh)	log2 fold change (SCIO469/Veh)	CV (Veh)	CV (SCIO469)
sp|Q16539|MK14_HUMAN	MAPK14	MK14_HUMAN Mitogen-activated protein kinase 14	16	4.42323	4.42388	4.84436	4.98782	11.2085	11.4202	10.3856	10.7238	4.66982	10.9345	2.34153	1.22745	0.0621724	0.042787
sp|Q96C90|PP14B_HUMAN	PPP1R14B	PP14B_HUMAN Protein phosphatase 1 regulatory subunit 14B	4	4.44563	5.43162	5.02699	5.08645	6.59224	9.33511	7.8177	7.78081	4.99767	7.88146	1.57703	0.657207	0.0818348	0.142599
sp|P53778|MK12_HUMAN	MAPK12	MK12_HUMAN Mitogen-activated protein kinase 12	3	5.3002	4.92696	5.02165	6.09607	7.92697	8.07466	8.67703	8.69122	5.33622	8.34247	1.56337	0.644656	0.0994636	0.0478434
sp|P45984|MK09_HUMAN	MAPK9	MK09_HUMAN Mitogen-activated protein kinase 9	4	5.32268	5.71	5.69969	5.96396	8.54684	8.45431	8.00303	8.54992	5.67408	8.38852	1.47839	0.56403	0.0465685	0.0310898
sp|Q05932|FOLC_HUMAN	FPGS	FOLC_HUMAN Folylpolyglutamate synthase, mitochondrial	3	4.95144	5.61426	6.08925	6.11169	6.27765	7.4159	8.65696	8.53365	5.69166	7.72104	1.35655	0.439946	0.0956113	0.144083
sp|P63165|SUMO1_HUMAN	SUMO1	SUMO1_HUMAN Small ubiquitin-related modifier 1	11	5.56949	5.75519	5.79447	5.48771	6.35646	8.26461	8.26666	7.32092	5.65172	7.55216	1.33626	0.418201	0.0259933	0.120906
sp|P49336|CDK8_HUMAN	CDK8	CDK8_HUMAN Cyclin-dependent kinase 8	5	5.19056	5.05874	6.38981	6.28395	7.4446	7.48944	7.6384	8.04121	5.73076	7.65341	1.3355	0.417375	0.122719	0.0354716
[truncated: 6,993 more rows]

## Sheet: pbFDR - Perseus - solvent-PISA
Significant	-Log10(P-value)	log2 fold change	Protein Id	Gene Symbol	Description	Number of peptides	Veh_1	Veh_2	Veh_3	Veh_4	SCIO469_12	SCIO469_2	SCIO469_3	SCIO469_4
[truncated: 7,213 more rows]

[truncated: 3 more sheets: Legend - thermal-PISA, Full dataset - thermal-PISA, Filtered dataset - thermal-PISA]
