# Supplementary material for: Assessing target engagement using proteome-wide solvent shift assays
Source: eLife. 2021 Dec 8;10:e70784. doi: 10.7554/eLife.70784 (PMC8654358; doi:10.7554/eLife.70784)
Supplement: Figure 3—source data 2. [file elife-70784-fig3-data2.xlsx]

## Sheet: Legend - solvent-PISA
This table contains solvent-PISA data for DMSO- and Vorinostat-treated HCT116 lysates (N=4)
The eight samples contained within represent eight TMT channels from a TMTpro 16plex
Full dataset - solvent-PISA tab - Unfiltered protein abundance data - 8301 proteins
Uniprot Id
Gene Symbol
Description
Number of peptides	Number of quantified peptides
Veh_1 (126)	TMT SSN scaled to 100
Veh_2 (127N)	TMT SSN scaled to 100
Veh_3 (127C)	TMT SSN scaled to 100
Veh_4 (128N)	TMT SSN scaled to 100
Vorinostat_1 (130C)	TMT SSN scaled to 100
Vorinostat_2 (131N)	TMT SSN scaled to 100
Vorinostat_3 (131C)	TMT SSN scaled to 100
Vorinostat_4 (132N)	TMT SSN scaled to 100
Average (Veh)	Mean of Vehicle treated samples
Average (Vorinostat)	Mean of Vorinostat-treated samples
fold change (Vorinostat/Veh)	fold change of Vorinostat-treated samples compared to vehicle treated control
log2 fold change (Vorinostat/Veh)	log2 trasnfomation of fold change
CV (Veh)	%CV of vehicle-treated samples
CV (Vorinostat)	%CV of Vorinostat-treated samples
Filtered dataset - solvent-PISA tab - Proteins quantified with at least two peptides, %CV < 15% - 6948 proteins
Uniprot Id
Gene Symbol
Description
Number of peptides	Number of quantified peptides
Veh_1 (126)	TMT SSN scaled to 100
Veh_2 (127N)	TMT SSN scaled to 100
Veh_3 (127C)	TMT SSN scaled to 100
Veh_4 (128N)	TMT SSN scaled to 100
Vorinostat_1 (130C)	TMT SSN scaled to 100
Vorinostat_2 (131N)	TMT SSN scaled to 100
Vorinostat_3 (131C)	TMT SSN scaled to 100
Vorinostat_4 (132N)	TMT SSN scaled to 100
Average (Veh)	Mean of Vehicle treated samples
Average (Vorinostat)	Mean of Vorinostat-treated samples
fold change (Vorinostat/Veh)	fold change of Vorinostat-treated samples compared to vehicle treated control
log2 fold change (Vorinostat/Veh)	log2 trasnfomation of fold change
CV (Veh)	%CV of vehicle-treated samples
CV (Vorinostat)	%CV of Vorinostat-treated samples
pbFDR - Perseus - solvent-PISA tab - Proteins quantified with at least two peptides - 7213 proteins
Significant	+ indicates an FDR < 0.05
-Log10(P-value)	nominal p-value
log2 fold change	log2 transformation of fold change (Vorinostat/Vehicle)
Protein Id
Gene Symbol
Description
Number of peptides	Number of quantified peptides
Veh_1	TMT SSN scaled to 100 - log2 transformation
Veh_2	TMT SSN scaled to 100 - log2 transformation
Veh_3	TMT SSN scaled to 100 - log2 transformation
Veh_4	TMT SSN scaled to 100 - log2 transformation
Vorinostat_1	TMT SSN scaled to 100 - log2 transformation
Vorinostat_2	TMT SSN scaled to 100 - log2 transformation
Vorinostat_3	TMT SSN scaled to 100 - log2 transformation
Vorinostat_4	TMT SSN scaled to 100 - log2 transformation

## Sheet: Full dataset - solvent-PISA
Uniprot Id	Gene Symbol	Description	Number of peptides	Veh_1	Veh_2	Veh_3	Veh_4	Vorinostat_1	Vorinostat_2	Vorinostst_3	Vorinostat_4	average (Veh)	average (Vorinostat)	fold change (Vorinostat/Veh)	log2 fold change (Vorinostat/Veh)	CV (Veh)	CV (Vorinostat)
sp|Q9UKX2|MYH2_HUMAN	MYH2	MYH2_HUMAN Myosin-2	2	1.99847	1.4562	1.57267	2.82268	7.93771	15.9859	1.83662	1.76436	1.96251	6.88115	3.50631	1.80995	0.315417	0.977181
sp|O75891-3|AL1L1_HUMAN	ALDH1L1	AL1L1_HUMAN Isoform 3 of Cytosolic 10-formyltetrahydrofolate dehydrogenase	5	2.76284	2.3909	3.27803	3.21641	11.1235	9.67274	8.16027	8.09078	2.91204	9.26182	3.18052	1.66926	0.143029	0.15546
sp|P16152|CBR1_HUMAN	CBR1	CBR1_HUMAN Carbonyl reductase [NADPH] 1	2	3.15864	3.31611	3.00331	3.26816	8.88562	10.6624	9.11812	6.83076	3.18655	8.87422	2.7849	1.47762	0.0435601	0.177374
sp|P00326|ADH1G_HUMAN	ADH1C	ADH1G_HUMAN Alcohol dehydrogenase 1C	2	3.40416	3.48927	3.8018	4.05955	11.6429	7.94429	8.16865	7.44175	3.6887	8.7994	2.3855	1.25429	0.0814886	0.218183
sp|P05062|ALDOB_HUMAN	ALDOB	ALDOB_HUMAN Fructose-bisphosphate aldolase B	3	3.60978	3.36601	3.08004	3.6439	8.70273	9.49701	7.72534	6.05394	3.42493	7.99475	2.33428	1.22298	0.0762385	0.185489
sp|Q562R1|ACTBL_HUMAN	ACTBL2	ACTBL_HUMAN Beta-actin-like protein 2	2	5.0692	4.19121	5.23626	5.20457	4.6556	7.46413	10.7031	16.2504	4.92531	9.76831	1.98329	0.987894	0.100447	0.509604
sp|Q9GZZ8|LACRT_HUMAN	LACRT	LACRT_HUMAN Extracellular glycoprotein lacritin	1	4.03195	5.68043	4.2388	1.95438	12.3782	3.14284	9.82668	6.07468	3.97639	7.8556	1.97556	0.982262	0.385907	0.518238
sp|P07451|CAH3_HUMAN	CA3	CAH3_HUMAN Carbonic anhydrase 3	2	4.09537	3.86582	4.01539	5.2128	9.97531	7.37557	7.67319	8.77552	4.29734	8.4499	1.96631	0.975488	0.143734	0.139867
sp|P05413|FABPH_HUMAN	FABP3	FABPH_HUMAN Fatty acid-binding protein, heart	1	3.68712	3.5208	3.56452	3.21653	4.77295	13.9455	4.25315	3.70347	3.49724	6.66877	1.90686	0.931202	0.0571722	0.730385
sp|Q13547|HDAC1_HUMAN	HDAC1	HDAC1_HUMAN Histone deacetylase 1	18	4.81943	4.72204	5.08057	5.3153	9.84656	9.88505	8.81223	8.83966	4.98433	9.34587	1.87505	0.906929	0.0536835	0.0642715
sp|P69905|HBA_HUMAN	HBA1	HBA_HUMAN Hemoglobin subunit alpha	20	4.17964	5.50395	3.82167	4.0898	8.13575	7.80307	6.43822	9.5309	4.39877	7.97699	1.81346	0.858745	0.171029	0.159195
sp|Q9BT92|TCHP_HUMAN	TCHP	TCHP_HUMAN Trichoplein keratin filament-binding protein	2	5.11503	5.25389	6.05518	5.21065	9.29114	10.1328	9.77783	9.33925	5.40869	9.63526	1.78144	0.833044	0.0804044	0.0412501
sp|P02042|HBD_HUMAN	HBD	HBD_HUMAN Hemoglobin subunit delta	4	4.09656	5.89773	3.77757	4.53639	7.83343	8.93221	5.86129	7.85131	4.57706	7.61956	1.66473	0.735286	0.204015	0.167968
sp|P42330|AK1C3_HUMAN	AKR1C3	AK1C3_HUMAN Aldo-keto reductase family 1 member C3	1	4.5138	5.37082	4.65771	5.60618	10.8362	8.79746	6.49003	7.15051	5.03713	8.31855	1.65145	0.723731	0.10586	0.233058
tr|Q9H552|Q9H552_HUMAN		Q9H552_HUMAN Uncharacterized protein	1	4.07474	3.42704	5.37842	1.40502	2.0486	10.9577	4.47043	5.42692	3.57131	5.72591	1.60331	0.681054	0.463857	0.657801
sp|Q13228|SBP1_HUMAN	SELENBP1	SBP1_HUMAN Selenium-binding protein 1	1	2.95597	8.55416	2.57933	4.12741	6.07089	8.47853	5.15654	9.38762	4.55422	7.27339	1.59707	0.675426	0.603154	0.273244
sp|P0DM35|M1BL1_HUMAN	MT1HL1	M1BL1_HUMAN Metallothionein 1H-like protein 1	1	5.50748	6.00123	4.93174	5.88766	10.8257	8.29379	6.36531	10.1443	5.58203	8.90728	1.59571	0.674195	0.0863858	0.224989
sp|Q7RTV2|GSTA5_HUMAN	GSTA5	GSTA5_HUMAN Glutathione S-transferase A5	4	4.70091	4.43809	5.23573	5.32572	8.44767	7.7958	6.94089	7.69978	4.92511	7.72104	1.56769	0.648638	0.0864954	0.0799325
sp|Q3MIT2|PUS10_HUMAN	PUS10	PUS10_HUMAN Putative tRNA pseudouridine synthase Pus10	1	4.99624	4.8701	5.36779	6.45376	9.29573	8.08197	6.94354	9.25311	5.42197	8.39359	1.54807	0.63047	0.132713	0.133243
sp|P00352|AL1A1_HUMAN	ALDH1A1	AL1A1_HUMAN Retinal dehydrogenase 1	4	7.83507	8.71053	3.93238	3.46151	12.828	11.3874	5.91837	5.54716	5.98487	8.92023	1.49046	0.575761	0.446602	0.418189
sp|Q92769|HDAC2_HUMAN	HDAC2	HDAC2_HUMAN Histone deacetylase 2	24	5.33626	5.72231	5.84366	5.78227	8.62204	8.40464	8.01096	8.13912	5.67112	8.29419	1.46253	0.548466	0.0403226	0.0329414
sp|P30837|AL1B1_HUMAN	ALDH1B1	AL1B1_HUMAN Aldehyde dehydrogenase X, mitochondrial	29	5.38053	5.41811	5.49896	5.58311	8.40762	8.63519	6.97266	7.23536	5.47018	7.81271	1.42824	0.514235	0.016463	0.106307
sp|O75326|SEM7A_HUMAN	SEMA7A	SEM7A_HUMAN Semaphorin-7A	1	5.73734	5.2912	5.01605	5.90184	7.14814	8.21453	7.5464	8.4123	5.48661	7.83034	1.42717	0.513161	0.0740272	0.0749137
sp|Q9BV23|ABHD6_HUMAN	ABHD6	ABHD6_HUMAN Monoacylglycerol lipase ABHD6	7	5.46817	5.16999	5.77288	5.9619	8.69057	8.57767	7.43162	7.20954	5.59323	7.97735	1.42625	0.512227	0.0621882	0.0959169
sp|O60218|AK1BA_HUMAN	AKR1B10	AK1BA_HUMAN Aldo-keto reductase family 1 member B10	1	8.63425	8.59921	4.3465	5.23102	19.687	9.30846	4.47025	4.63137	6.70275	9.52427	1.42095	0.506856	0.334107	0.749351
sp|Q9UM22|EPDR1_HUMAN	EPDR1	EPDR1_HUMAN Mammalian ependymin-related protein 1	1	5.30911	6.13516	5.18587	4.89948	6.3791	8.19527	8.13858	7.27213	5.38241	7.49627	1.39274	0.477922	0.0985364	0.114223
sp|O43570|CAH12_HUMAN	CA12	CAH12_HUMAN Carbonic anhydrase 12	1	7.50017	4.16194	5.35803	3.53332	5.92939	7.89392	5.7842	8.73398	5.13837	7.08537	1.37892	0.463534	0.33999	0.206158
sp|Q13488|VPP3_HUMAN	TCIRG1	VPP3_HUMAN V-type proton ATPase 116 kDa subunit a isoform 3	6	5.48472	5.83088	5.98317	6.29564	8.3771	8.25148	8.09337	7.70304	5.8986	8.10625	1.37427	0.458661	0.0571295	0.0361203
sp|P26651|TTP_HUMAN	ZFP36	TTP_HUMAN Tristetraprolin	1	4.08408	4.81335	4.847	5.77157	4.83544	7.81524	8.10428	5.47428	4.879	6.55731	1.34399	0.426519	0.1417	0.250791
sp|Q96C90|PP14B_HUMAN	PPP1R14B	PP14B_HUMAN Protein phosphatase 1 regulatory subunit 14B	4	4.44563	5.43162	5.02699	5.08645	5.48329	7.71522	7.69223	5.86912	4.99767	6.68996	1.33862	0.420742	0.0818348	0.176559
sp|Q96JH7|VCIP1_HUMAN	VCPIP1	VCIP1_HUMAN Deubiquitinating protein VCIP135	23	5.58467	5.47893	6.17416	5.99033	7.52891	7.36504	7.67253	8.04309	5.80702	7.65239	1.31778	0.398112	0.0567213	0.0377891
tr|H0YLY0|H0YLY0_HUMAN	CDC42BPB	H0YLY0_HUMAN Serine/threonine-protein kinase MRCK beta (Fragment)	1	5.7759	4.99002	5.18001	6.38784	6.93213	8.09546	6.68263	7.67273	5.58344	7.34574	1.31563	0.395752	0.113226	0.0889147
sp|Q06547|GABP1_HUMAN	GABPB1	GABP1_HUMAN GA-binding protein subunit beta-1	1	4.64736	4.7472	5.41974	6.33301	6.83906	5.89511	6.82152	8.21523	5.28683	6.94273	1.31321	0.393101	0.147013	0.137708
sp|Q9UM00|TMCO1_HUMAN	TMCO1	TMCO1_HUMAN Transmembrane and coiled-coil domain-containing protein 1	1	4.54284	4.57657	6.05536	6.17583	6.40846	8.72565	5.62197	7.25998	5.33765	7.00401	1.31219	0.391977	0.168566	0.189669
sp|O15417|TNC18_HUMAN	TNRC18	TNC18_HUMAN Trinucleotide repeat-containing gene 18 protein	1	4.73603	6.96012	4.34142	5.06328	7.1798	7.65878	6.96722	5.61922	5.27521	6.85626	1.29971	0.378192	0.220161	0.127466
sp|Q8IVH2|FOXP4_HUMAN	FOXP4	FOXP4_HUMAN Forkhead box protein P4	2	5.87562	5.49401	5.73184	6.32911	6.95745	8.14171	8.25532	6.95415	5.85764	7.57716	1.29355	0.371336	0.0600073	0.0948879
sp|P37840|SYUA_HUMAN	SNCA	SYUA_HUMAN Alpha-synuclein	1	5.75101	5.58886	5.14274	6.10136	6.92095	7.6684	7.16888	7.19937	5.64599	7.2394	1.28222	0.358643	0.0704705	0.0430971
sp|Q8TF21-2|ANR24_HUMAN	ANKRD24	ANR24_HUMAN Isoform 2 of Ankyrin repeat domain-containing protein 24	1	4.89562	5.43392	4.40174	6.3401	6.02301	4.63239	9.13383	7.19877	5.26784	6.747	1.28079	0.357033	0.157533	0.282474
sp|Q9BYE7|PCGF6_HUMAN	PCGF6	PCGF6_HUMAN Polycomb group RING finger protein 6	1	5.29222	5.35961	6.44877	5.22362	4.88092	8.00766	7.01776	8.48493	5.58106	7.09782	1.27177	0.346838	0.104126	0.225318
sp|P27348|1433T_HUMAN	YWHAQ	1433T_HUMAN 14-3-3 protein theta	32	5.18403	5.20997	4.82666	4.96874	4.86161	7.15962	7.86483	5.78569	5.04735	6.41794	1.27155	0.346584	0.0361741	0.210309
sp|Q96DC9|OTUB2_HUMAN	OTUB2	OTUB2_HUMAN Ubiquitin thioesterase OTUB2	3	5.15381	5.92203	5.57239	5.94443	6.70146	7.11187	7.27029	7.47685	5.64816	7.14012	1.26415	0.338166	0.0656835	0.0459945
tr|F8W950|F8W950_HUMAN	AIMP2	F8W950_HUMAN Aminoacyl tRNA synthase complex-interacting multifunctional protein 2	1	4.93435	4.67225	6.02858	6.99511	8.08117	6.63311	6.80296	7.03943	5.65757	7.13917	1.26188	0.335573	0.188737	0.0910092
sp|Q9UKK6|NXT1_HUMAN	NXT1	NXT1_HUMAN NTF2-related export protein 1	1	5.36838	4.7387	6.34453	5.90213	6.24206	7.16558	8.11069	6.64604	5.58843	7.04109	1.25994	0.333355	0.123998	0.114622
sp|Q8IYD8|FANCM_HUMAN	FANCM	FANCM_HUMAN Fanconi anemia group M protein	1	6.46613	4.95114	7.51791	5.04425	7.67779	6.74034	7.04853	8.72793	5.99486	7.54865	1.25919	0.332493	0.205087	0.116267
sp|Q14749|GNMT_HUMAN	GNMT	GNMT_HUMAN Glycine N-methyltransferase	1	5.33072	5.01485	7.62269	5.11727	6.82691	8.00504	6.25268	7.9696	5.77138	7.26356	1.25855	0.331759	0.215061	0.119515
tr|H3BT54|H3BT54_HUMAN	FANCI	H3BT54_HUMAN Fanconi anemia group I protein (Fragment)	1	5.21926	6.17725	6.73993	4.80868	7.82634	7.69065	6.71257	6.63449	5.73628	7.21601	1.25796	0.331086	0.153618	0.0872583
sp|P00439|PH4H_HUMAN	PAH	PH4H_HUMAN Phenylalanine-4-hydroxylase	2	5.24118	6.93551	5.04333	5.24158	7.38364	7.32993	6.27977	7.07909	5.6154	7.01811	1.2498	0.321693	0.157604	0.0726416
sp|P48380|RFX3_HUMAN	RFX3	RFX3_HUMAN Transcription factor RFX3	2	4.69942	5.40968	5.73864	5.44631	5.33398	7.85327	7.38531	6.00013	5.32351	6.64317	1.24789	0.319494	0.0829027	0.176889
sp|Q96FK6|WDR89_HUMAN	WDR89	WDR89_HUMAN WD repeat-containing protein 89	3	5.61262	6.028	6.2587	5.93981	7.56279	6.97326	7.32174	7.87187	5.95978	7.43242	1.2471	0.318571	0.0449111	0.0511268
tr|H0YJP0|H0YJP0_HUMAN	HECTD1	H0YJP0_HUMAN E3 ubiquitin-protein ligase HECTD1 (Fragment)	1	5.32388	4.96904	7.43308	4.52567	7.68102	5.44701	6.88811	7.71311	5.56292	6.93231	1.24616	0.317495	0.231682	0.153077
sp|Q9BY41|HDAC8_HUMAN	HDAC8	HDAC8_HUMAN Histone deacetylase 8	8	5.26653	5.47072	5.87313	6.065	6.85081	7.20036	7.01954	7.11604	5.66885	7.04669	1.24306	0.31389	0.0643956	0.0212913
sp|P17812|PYRG1_HUMAN	CTPS1	PYRG1_HUMAN CTP synthase 1	23	5.51412	5.37152	5.98756	6.19762	6.68979	6.61463	7.5699	7.5139	5.76771	7.09706	1.23048	0.299223	0.0674793	0.0725774
sp|Q8N8N7|PTGR2_HUMAN	PTGR2	PTGR2_HUMAN Prostaglandin reductase 2	13	5.41033	5.3503	5.80715	6.23374	6.78233	6.81455	7.16442	7.28266	5.70038	7.01099	1.22992	0.29856	0.0718007	0.0357266
sp|A6NKF1|SAC31_HUMAN	SAC3D1	SAC31_HUMAN SAC3 domain-containing protein 1	1	5.89865	5.29645	6.55956	5.26151	7.02779	5.85131	9.15117	6.26943	5.75404	7.07493	1.22956	0.298139	0.106271	0.207397
sp|Q92738-2|US6NL_HUMAN	USP6NL	US6NL_HUMAN Isoform 2 of USP6 N-terminal-like protein	1	4.84842	4.45792	6.53631	5.88652	5.79681	5.27399	6.50169	9.14317	5.43229	6.67891	1.22948	0.298053	0.175138	0.257246
sp|Q6P9H4|CNKR3_HUMAN	CNKSR3	CNKR3_HUMAN Connector enhancer of kinase suppressor of ras 3	1	4.74002	6.60592	6.41066	6.16192	7.16218	10.1467	6.3806	5.71093	5.97963	7.3501	1.22919	0.297708	0.141505	0.26618
sp|Q7Z7F7-2|RM55_HUMAN	MRPL55	RM55_HUMAN Isoform 2 of 39S ribosomal protein L55, mitochondrial	5	4.74443	4.86019	6.02276	6.81506	6.13875	6.13979	7.75224	7.5476	5.61061	6.89459	1.22885	0.297308	0.176261	0.12708
sp|Q9Y646|CBPQ_HUMAN	CPQ	CBPQ_HUMAN Carboxypeptidase Q	1	6.29279	5.63482	6.0239	5.02941	5.53734	7.10828	9.04247	6.51159	5.74523	7.04992	1.22709	0.295242	0.0954446	0.209614
sp|Q8NFU5|IPMK_HUMAN	IPMK	IPMK_HUMAN Inositol polyphosphate multikinase	1	3.61626	4.50896	7.07362	6.77024	6.71376	6.38589	7.14312	6.70637	5.49227	6.73728	1.22668	0.294765	0.308635	0.0461234
sp|Q5BJH7|YIF1B_HUMAN	YIF1B	YIF1B_HUMAN Protein YIF1B	4	4.31185	5.50911	7.08565	6.36463	6.00525	6.9596	7.46298	8.07441	5.81781	7.12556	1.22478	0.292527	0.205057	0.122796
sp|Q9BYD2|RM09_HUMAN	MRPL9	RM09_HUMAN 39S ribosomal protein L9, mitochondrial	11	4.98632	4.98205	5.96781	6.54034	6.37568	6.20433	7.67991	7.26135	5.61913	6.88032	1.22445	0.292128	0.136948	0.10264
sp|Q16186|ADRM1_HUMAN	ADRM1	ADRM1_HUMAN Proteasomal ubiquitin receptor ADRM1	16	5.90533	5.73644	5.68104	5.81704	6.91515	7.32966	7.25891	6.82242	5.78496	7.08154	1.22413	0.291755	0.0168992	0.0353362
sp|O75752|B3GL1_HUMAN	B3GALNT1	B3GL1_HUMAN UDP-GalNAc:beta-1,3-N-acetylgalactosaminyltransferase 1	1	5.2942	6.30578	5.58518	4.43031	6.47556	7.59169	6.84396	5.52449	5.40387	6.60893	1.223	0.290423	0.143586	0.130011
sp|O95503|CBX6_HUMAN	CBX6	CBX6_HUMAN Chromobox protein homolog 6	1	5.19197	5.87636	5.01502	5.33359	4.97951	5.76716	5.75235	9.6835	5.35424	6.54563	1.22251	0.289852	0.0694179	0.324493
sp|Q5BKT4|AG10A_HUMAN	ALG10	AG10A_HUMAN Dol-P-Glc:Glc(2)Man(9)GlcNAc(2)-PP-Dol alpha-1,2-glucosyltransferase	1	5.44044	5.89499	6.34067	5.81326	9.05095	6.08963	6.42304	7.03702	5.87234	7.15016	1.2176	0.28404	0.0629439	0.185528
tr|G3V5X9|G3V5X9_HUMAN	SNX6	G3V5X9_HUMAN Sorting nexin-6 (Fragment)	1	5.16557	6.33864	4.79041	7.20717	3.96473	8.42127	7.89508	8.26049	5.87545	7.13539	1.21444	0.280294	0.18823	0.297841
sp|Q9NWT8|AKIP_HUMAN	AURKAIP1	AKIP_HUMAN Aurora kinase A-interacting protein	1	6.52515	5.63587	6.21793	5.36391	7.30777	6.67256	6.32035	8.50161	5.93572	7.20057	1.21309	0.27869	0.089356	0.133153
sp|A2RU49|HYKK_HUMAN	HYKK	HYKK_HUMAN Hydroxylysine kinase	1	6.0674	5.09986	5.73788	6.69199	6.63074	8.24742	6.49392	7.2362	5.89928	7.15207	1.21236	0.277821	0.112517	0.111617
sp|Q14568|HS902_HUMAN	HSP90AA2	HS902_HUMAN Putative heat shock protein HSP 90-alpha A2	1	6.33686	5.59066	5.49188	5.66253	6.65068	6.63843	6.66257	7.93092	5.77048	6.97065	1.20798	0.272601	0.0665474	0.0918502
sp|P01116-2|RASK_HUMAN	KRAS	RASK_HUMAN Isoform 2B of GTPase KRas	1	5.56401	5.86026	5.10116	5.87382	6.98931	6.01533	6.69717	7.33263	5.59981	6.75861	1.20694	0.271348	0.0646218	0.0827763
sp|Q6Y2X3|DJC14_HUMAN	DNAJC14	DJC14_HUMAN DnaJ homolog subfamily C member 14	1	4.56672	6.83809	7.23224	4.98951	5.13699	8.18857	6.90705	8.26025	5.90664	7.12322	1.20597	0.270191	0.224206	0.205361
sp|P55211|CASP9_HUMAN	CASP9	CASP9_HUMAN Caspase-9	1	6.1227	5.97877	5.05973	4.584	6.99086	6.11482	5.24714	7.82931	5.4363	6.54553	1.20404	0.267885	0.135742	0.170072
sp|Q3MII6|TBC25_HUMAN	TBC1D25	TBC25_HUMAN TBC1 domain family member 25	1	4.95008	5.65737	5.72956	5.14089	6.66521	4.91628	6.73785	7.53033	5.36947	6.46242	1.20355	0.267293	0.0713794	0.170636
sp|Q8N8Q8|COX18_HUMAN	COX18	COX18_HUMAN Mitochondrial inner membrane protein COX18	1	5.25238	5.0846	6.08274	6.67015	6.0472	7.24591	6.98954	7.40607	5.77247	6.92218	1.19917	0.262038	0.12831	0.087837
sp|Q99595|TI17A_HUMAN	TIMM17A	TI17A_HUMAN Mitochondrial import inner membrane translocase subunit Tim17-A	2	5.08288	4.53289	4.17368	5.97314	5.3401	5.94668	6.30475	6.09449	4.94065	5.9215	1.19853	0.261264	0.158546	0.0700015
sp|Q6UWW8|EST3_HUMAN	CES3	EST3_HUMAN Carboxylesterase 3	1	3.59237	6.4222	7.59033	5.46998	7.47856	8.54283	6.392	5.16446	5.76872	6.89446	1.19515	0.257187	0.293006	0.21025
sp|Q9UJ68|MSRA_HUMAN	MSRA	MSRA_HUMAN Mitochondrial peptide methionine sulfoxide reductase	4	5.34121	5.54534	5.28846	6.07206	5.47087	7.1807	7.24163	6.69492	5.56177	6.64703	1.19513	0.257166	0.0643277	0.123571
sp|Q6P4A7-3|SFXN4_HUMAN	SFXN4	SFXN4_HUMAN Isoform 3 of Sideroflexin-4	1	4.59848	4.84636	6.33778	7.02197	5.80374	7.19327	6.65051	7.59113	5.70115	6.80966	1.19444	0.256331	0.204965	0.113593
sp|Q6ZT07|TBCD9_HUMAN	TBC1D9	TBCD9_HUMAN TBC1 domain family member 9	3	5.11349	5.32781	5.62932	5.58686	5.4936	6.76664	7.294	6.30358	5.41437	6.46446	1.19394	0.255735	0.0444773	0.118077
sp|Q9H9R9-3|DBND1_HUMAN	DBNDD1	DBND1_HUMAN Isoform 3 of Dysbindin domain-containing protein 1	4	5.79432	6.78612	6.05119	6.12358	6.37177	8.09463	8.10729	6.92612	6.1888	7.37495	1.19166	0.252973	0.0682734	0.117743
sp|Q9H3H1|MOD5_HUMAN	TRIT1	MOD5_HUMAN tRNA dimethylallyltransferase, mitochondrial	2	5.05916	5.55947	6.24567	6.80381	6.39807	6.87306	7.26501	7.61827	5.91703	7.0386	1.18955	0.250416	0.12938	0.0745023
sp|Q8N531|FBXL6_HUMAN	FBXL6	FBXL6_HUMAN F-box/LRR-repeat protein 6	1	5.07559	7.49782	6.04849	6.12499	7.31507	7.36904	8.40257	6.3455	6.18672	7.35805	1.18933	0.250147	0.161002	0.1142
sp|Q96I59|SYNM_HUMAN	NARS2	SYNM_HUMAN Probable asparagine--tRNA ligase, mitochondrial	12	5.0527	5.23657	6.0505	6.32361	5.6075	5.90895	8.11759	7.2503	5.66585	6.72108	1.18625	0.246403	0.10884	0.174571
sp|Q969R8|ITFG2_HUMAN	ITFG2	ITFG2_HUMAN Integrin-alpha FG-GAP repeat-containing protein 2	1	4.9471	5.16531	6.27244	6.24703	6.51288	6.23214	7.34793	6.73229	5.65797	6.70631	1.18529	0.245235	0.123829	0.0707099
sp|Q9UM54-6|MYO6_HUMAN	MYO6	MYO6_HUMAN Isoform 6 of Unconventional myosin-VI	62	5.32651	5.62072	5.94199	6.14768	6.43406	6.38443	7.07492	7.39054	5.75923	6.82099	1.18436	0.244106	0.0626631	0.0722779
sp|O15066|KIF3B_HUMAN	KIF3B	KIF3B_HUMAN Kinesin-like protein KIF3B	2	5.16413	4.99049	6.0555	6.91564	6.14198	6.22736	7.46335	7.53291	5.78144	6.8414	1.18334	0.242863	0.153678	0.111038
sp|Q6ZRI6|CO039_HUMAN	C15orf39	CO039_HUMAN Uncharacterized protein C15orf39	2	4.60796	5.79394	5.90608	6.19344	5.72486	5.73906	7.82258	7.26333	5.62535	6.63746	1.17992	0.238687	0.124227	0.161241
sp|Q96CN5|LRC45_HUMAN	LRRC45	LRC45_HUMAN Leucine-rich repeat-containing protein 45	2	5.61867	6.02813	5.62561	5.8061	6.35078	7.2043	6.44052	7.23418	5.76963	6.80744	1.17988	0.238635	0.0334415	0.0700799
sp|Q14849|STAR3_HUMAN	STARD3	STAR3_HUMAN StAR-related lipid transfer protein 3	1	4.45263	6.42571	7.88943	6.2852	7.22264	6.75243	8.31887	7.26233	6.26324	7.38907	1.17975	0.238483	0.224847	0.0895533
sp|P09417|DHPR_HUMAN	QDPR	DHPR_HUMAN Dihydropteridine reductase	11	5.43206	5.05431	6.03159	6.48457	6.37521	6.54035	7.10718	7.1112	5.75063	6.78348	1.17961	0.238306	0.110161	0.0563265
sp|Q8NFZ5|TNIP2_HUMAN	TNIP2	TNIP2_HUMAN TNFAIP3-interacting protein 2	1	4.67177	5.76531	6.98482	5.28342	6.301	6.48546	6.64809	7.33911	5.67633	6.69341	1.17918	0.237784	0.172718	0.0677106
tr|I3L356|I3L356_HUMAN	EPN2	I3L356_HUMAN Epsin-2 (Fragment)	1	5.19373	7.25395	5.60671	5.25906	6.75816	5.92857	7.12851	7.67528	5.82836	6.87263	1.17917	0.237772	0.166002	0.106728
sp|Q9HBU6|EKI1_HUMAN	ETNK1	EKI1_HUMAN Ethanolamine kinase 1	10	5.15644	5.62326	5.92588	5.91043	5.39254	7.19957	8.08469	5.98559	5.654	6.6656	1.17892	0.237462	0.0636214	0.181317
sp|Q13445|TMED1_HUMAN	TMED1	TMED1_HUMAN Transmembrane emp24 domain-containing protein 1	4	5.30708	5.60678	5.47408	6.34331	5.96711	6.77354	7.08317	6.9235	5.68281	6.68683	1.17668	0.234717	0.080433	0.0742041
tr|B4DX52|B4DX52_HUMAN	DNAJB1	B4DX52_HUMAN DnaJ homolog subfamily B member 1	1	6.15006	7.14612	4.94818	5.01431	4.70987	8.00591	8.67638	5.9592	5.81467	6.83784	1.17596	0.233844	0.179733	0.267604
sp|Q8N1S5|S39AB_HUMAN	SLC39A11	S39AB_HUMAN Zinc transporter ZIP11	2	5.65636	4.98852	5.9164	6.19251	6.81675	6.64045	6.90891	6.38999	5.68845	6.68902	1.1759	0.233761	0.090608	0.0341395
sp|Q8N3A8|PARP8_HUMAN	PARP8	PARP8_HUMAN Poly [ADP-ribose] polymerase 8	1	5.22305	4.56224	7.45784	6.39239	6.61112	5.95882	7.66829	7.54586	5.90888	6.94602	1.17552	0.233302	0.21666	0.116611
sp|Q9Y6J0|CABIN_HUMAN	CABIN1	CABIN_HUMAN Calcineurin-binding protein cabin-1	8	6.16784	5.97455	6.0947	6.19864	6.97439	7.25301	6.93376	7.55872	6.10893	7.17997	1.17532	0.233058	0.016309	0.0403396
sp|P52306-4|GDS1_HUMAN	RAP1GDS1	GDS1_HUMAN Isoform 4 of Rap1 GTPase-GDP dissociation stimulator 1	1	5.72235	5.47343	6.26491	6.22031	7.3553	6.48345	7.14212	6.84792	5.92025	6.9572	1.17515	0.232848	0.0652474	0.0543581
sp|Q9BZE1|RM37_HUMAN	MRPL37	RM37_HUMAN 39S ribosomal protein L37, mitochondrial	16	5.16035	5.17671	6.07285	6.76083	5.75906	5.96387	7.7715	7.73468	5.79269	6.80728	1.17515	0.232846	0.133537	0.16092
sp|Q96GE9|TM261_HUMAN	TMEM261	TM261_HUMAN Transmembrane protein 261	1	5.47825	5.8552	6.28404	5.32186	6.81006	6.08191	6.68016	7.37335	5.73484	6.73637	1.17464	0.232219	0.0748314	0.0786751
sp|P50395|GDIB_HUMAN	GDI2	GDIB_HUMAN Rab GDP dissociation inhibitor beta	39	5.19935	5.16977	5.87764	6.33056	5.97	6.42857	7.2027	6.91467	5.64433	6.62899	1.17445	0.231986	0.0996229	0.0819429
sp|Q92692-2|PVRL2_HUMAN	PVRL2	PVRL2_HUMAN Isoform Alpha of Poliovirus receptor-related protein 2	2	5.3549	6.90098	4.94039	6.22136	6.9429	6.81325	6.2914	7.45274	5.85441	6.87507	1.17434	0.231852	0.150045	0.0693917
sp|O43150|ASAP2_HUMAN	ASAP2	ASAP2_HUMAN Arf-GAP with SH3 domain, ANK repeat and PH domain-containing protein 2	1	4.94026	5.86946	5.68417	6.35538	5.82041	6.55461	7.04375	7.4097	5.71232	6.70712	1.17415	0.231617	0.102829	0.102448
sp|Q58FG1|HS904_HUMAN	HSP90AA4P	HS904_HUMAN Putative heat shock protein HSP 90-alpha A4	1	5.93656	6.30711	6.17855	6.17811	7.41579	6.08204	7.95232	7.43223	6.15008	7.2206	1.17406	0.231512	0.0251627	0.110639
sp|Q16651|PRSS8_HUMAN	PRSS8	PRSS8_HUMAN Prostasin	2	5.29588	5.37419	5.41559	6.52635	5.58251	7.14972	6.93652	6.84413	5.653	6.62822	1.17251	0.229604	0.103369	0.106935
sp|P09038|FGF2_HUMAN	FGF2	FGF2_HUMAN Fibroblast growth factor 2	1	5.95312	5.46094	6.55529	4.97616	6.24904	7.34809	6.41495	6.89152	5.73638	6.7259	1.1725	0.229587	0.117864	0.0737741
sp|P49419-2|AL7A1_HUMAN	ALDH7A1	AL7A1_HUMAN Isoform 2 of Alpha-aminoadipic semialdehyde dehydrogenase	37	5.30542	5.48404	6.16021	6.26371	6.79826	6.68371	6.87497	6.84523	5.80335	6.80054	1.17183	0.228765	0.0825896	0.0123588
sp|Q05932|FOLC_HUMAN	FPGS	FOLC_HUMAN Folylpolyglutamate synthase, mitochondrial	3	4.95144	5.61426	6.08925	6.11169	5.50605	7.32904	7.63821	6.20121	5.69166	6.66863	1.17165	0.22854	0.0956113	0.148608
sp|Q6P1L8|RM14_HUMAN	MRPL14	RM14_HUMAN 39S ribosomal protein L14, mitochondrial	5	5.1825	5.56189	6.59267	5.64111	6.04237	6.528	7.267	7.0807	5.74454	6.72952	1.17146	0.228311	0.104412	0.0825136
sp|Q9BXC9|BBS2_HUMAN	BBS2	BBS2_HUMAN Bardet-Biedl syndrome 2 protein	2	5.40675	5.66195	6.0063	6.26514	6.46484	6.5203	7.43884	6.91193	5.83503	6.83398	1.1712	0.227984	0.0647098	0.0657982
sp|Q8N6M0|OTU6B_HUMAN	OTUD6B	OTU6B_HUMAN OTU domain-containing protein 6B	5	5.37773	5.62129	5.34919	6.38954	6.27624	6.80475	6.64035	6.90735	5.68444	6.65717	1.17112	0.227892	0.085438	0.0415707
sp|O75394|RM33_HUMAN	MRPL33	RM33_HUMAN 39S ribosomal protein L33, mitochondrial	2	5.39494	4.81407	5.96381	6.53348	5.75881	6.86484	7.17419	6.77542	5.67657	6.64332	1.1703	0.226883	0.13025	0.0924121
sp|Q8N490-2|PNKD_HUMAN	PNKD	PNKD_HUMAN Isoform 2 of Probable hydrolase PNKD	2	5.81765	5.86699	5.71897	5.54474	6.75806	6.56607	6.86441	6.66352	5.73709	6.71302	1.17011	0.226642	0.0247919	0.0190364
sp|O14653-2|GOSR2_HUMAN	GOSR2	GOSR2_HUMAN Isoform B of Golgi SNAP receptor complex member 2	5	5.93419	5.80191	5.79866	6.0374	6.06184	6.24452	7.68734	7.57195	5.89304	6.89141	1.16942	0.225788	0.0195319	0.124356
sp|Q96FX7|TRM61_HUMAN	TRMT61A	TRM61_HUMAN tRNA (adenine(58)-N(1))-methyltransferase catalytic subunit TRMT61A	2	5.05151	4.84571	6.04702	6.47184	5.50585	6.77659	6.66257	7.26511	5.60402	6.55253	1.16926	0.22559	0.139356	0.113715
sp|Q9Y365|PCTL_HUMAN	STARD10	PCTL_HUMAN PCTP-like protein	6	5.78199	5.83747	6.25116	5.79387	7.69705	6.37831	6.6334	6.95604	5.91612	6.9162	1.16904	0.225328	0.0379688	0.0826649
sp|Q9UHP3-3|UBP25_HUMAN	USP25	UBP25_HUMAN Isoform USP25m of Ubiquitin carboxyl-terminal hydrolase 25	15	5.73937	5.65395	6.08878	6.28859	6.72509	6.32451	7.46192	7.27507	5.94267	6.94665	1.16894	0.225205	0.0500786	0.0747782
sp|Q9Y5N5|HEMK2_HUMAN	N6AMT1	HEMK2_HUMAN HemK methyltransferase family member 2	2	5.66737	5.35161	6.08613	5.98327	6.31348	6.13051	7.57304	6.96559	5.7721	6.74565	1.16867	0.224863	0.0575456	0.0975151
sp|P49406|RM19_HUMAN	MRPL19	RM19_HUMAN 39S ribosomal protein L19, mitochondrial	20	5.21668	5.15939	6.01782	6.75687	6.22464	6.17036	7.64157	7.00224	5.78769	6.7597	1.16794	0.223972	0.130564	0.103559
sp|Q96DE9|CX04B_HUMAN	CXorf40B	CX04B_HUMAN Protein CXorf40B	2	5.23465	6.5272	5.75103	6.09057	6.93691	5.97324	7.2011	7.45494	5.90086	6.89155	1.16789	0.223902	0.0925407	0.093986
sp|Q12906|ILF3_HUMAN	ILF3	ILF3_HUMAN Interleukin enhancer-binding factor 3	1	5.84055	7.23933	5.37739	5.21222	7.84873	6.67993	6.80384	6.28706	5.91737	6.90489	1.16688	0.222662	0.155569	0.0965511
sp|Q5SQN1|SNP47_HUMAN	SNAP47	SNP47_HUMAN Synaptosomal-associated protein 47	2	5.48476	5.39264	6.16722	4.98825	5.30478	6.64744	7.71926	6.03118	5.50822	6.42567	1.16656	0.22226	0.0888504	0.159078
sp|Q13478|IL18R_HUMAN	IL18R1	IL18R_HUMAN Interleukin-18 receptor 1	1	6.3176	5.88138	7.14173	5.09655	6.78666	7.41657	6.88211	7.40915	6.10931	7.12362	1.16603	0.2216	0.139753	0.0472038
sp|Q9NWD8|TM248_HUMAN	TMEM248	TM248_HUMAN Transmembrane protein 248	2	5.59543	6.20955	6.31908	6.03407	7.43919	6.58207	6.71023	7.41429	6.03953	7.03645	1.16506	0.22041	0.0527344	0.0644949
sp|P23921|RIR1_HUMAN	RRM1	RIR1_HUMAN Ribonucleoside-diphosphate reductase large subunit	51	5.94361	5.95176	5.78268	6.01442	6.97159	7.05827	6.75672	6.80068	5.92312	6.89682	1.16439	0.219574	0.0166846	0.0205953
sp|Q5VV52-3|ZN691_HUMAN	ZNF691	ZN691_HUMAN Isoform 3 of Zinc finger protein 691	1	5.85679	6.54776	5.66418	5.87064	6.81599	7.96092	6.47931	6.60963	5.98484	6.96646	1.16402	0.219113	0.0646514	0.097224
sp|Q96A35|RM24_HUMAN	MRPL24	RM24_HUMAN 39S ribosomal protein L24, mitochondrial	9	5.32527	5.2557	6.23372	6.47766	6.42333	6.11705	7.34257	7.2233	5.82309	6.77656	1.16374	0.218769	0.1071	0.0885269
sp|Q9BRJ2|RM45_HUMAN	MRPL45	RM45_HUMAN 39S ribosomal protein L45, mitochondrial	20	5.14729	5.19264	6.16703	6.66485	6.18094	6.16553	7.4697	7.14632	5.79295	6.74062	1.16359	0.218583	0.129079	0.0991542
sp|Q9H9A5-2|CNO10_HUMAN	CNOT10	CNO10_HUMAN Isoform 2 of CCR4-NOT transcription complex subunit 10	1	5.28263	6.07615	7.46776	6.22064	8.39348	6.23577	7.99709	6.51512	6.2618	7.28536	1.16346	0.218425	0.144298	0.146756
sp|Q969M7-2|UBE2F_HUMAN	UBE2F	UBE2F_HUMAN Isoform 2 of NEDD8-conjugating enzyme UBE2F	1	4.62607	4.84768	7.32041	6.45628	7.15978	5.01769	7.13382	7.71037	5.81261	6.75542	1.1622	0.216858	0.222695	0.175948
sp|Q86T82|UBP37_HUMAN	USP37	UBP37_HUMAN Ubiquitin carboxyl-terminal hydrolase 37	2	4.78531	5.05398	6.51396	6.56871	5.95836	7.83342	7.85773	4.97588	5.73049	6.65635	1.16157	0.216072	0.16455	0.214925
sp|P09001|RM03_HUMAN	MRPL3	RM03_HUMAN 39S ribosomal protein L3, mitochondrial	27	5.25619	5.45057	5.95972	6.5172	6.33989	6.30769	7.21405	7.06492	5.79592	6.73164	1.16144	0.21592	0.0974811	0.0705687
sp|Q86X83|COMD2_HUMAN	COMMD2	COMD2_HUMAN COMM domain-containing protein 2	2	5.54315	5.1151	5.57526	6.43848	5.94482	6.72252	7.13703	6.49668	5.668	6.57526	1.16007	0.214209	0.0978891	0.0755799
sp|Q9BSG0|PADC1_HUMAN	PRADC1	PADC1_HUMAN Protease-associated domain-containing protein 1	2	5.44406	6.10803	4.96992	5.37725	5.86354	6.86884	6.4711	6.1988	5.47482	6.35057	1.15996	0.214076	0.0860834	0.067015
sp|Q6P5W5|S39A4_HUMAN	SLC39A4	S39A4_HUMAN Zinc transporter ZIP4	2	5.57427	5.30561	5.27395	6.54337	5.91849	6.31625	7.09528	6.99456	5.6743	6.58115	1.15982	0.213896	0.10483	0.08526
sp|Q9BYD1|RM13_HUMAN	MRPL13	RM13_HUMAN 39S ribosomal protein L13, mitochondrial	17	5.05688	5.18006	6.20986	6.76282	6.09681	5.83963	7.59775	7.37767	5.80241	6.72796	1.15951	0.213519	0.141822	0.132001
sp|Q6NUJ5|PWP2B_HUMAN	PWWP2B	PWP2B_HUMAN PWWP domain-containing protein 2B	1	7.4591	5.19274	5.11016	5.66763	7.10638	6.67737	6.57937	6.78342	5.85741	6.78663	1.15864	0.212434	0.18706	0.0337237
sp|Q9NWU5|RM22_HUMAN	MRPL22	RM22_HUMAN 39S ribosomal protein L22, mitochondrial	12	5.15819	5.22664	6.40001	6.61921	6.22009	6.20364	7.37474	7.31256	5.85101	6.77776	1.15839	0.212122	0.130958	0.0964867
sp|Q9H1C3|GL8D2_HUMAN	GLT8D2	GL8D2_HUMAN Glycosyltransferase 8 domain-containing protein 2	1	4.87571	5.61548	6.57579	6.13964	6.38908	7.01863	7.54285	5.92746	5.80166	6.7195	1.1582	0.21189	0.126096	0.105368
sp|Q7Z7C8-4|TAF8_HUMAN	TAF8	TAF8_HUMAN Isoform 3 of Transcription initiation factor TFIID subunit 8	4	5.90043	5.72235	5.49119	6.19741	6.84581	6.80438	6.69135	6.65056	5.82784	6.74803	1.15789	0.211503	0.0511243	0.013649
sp|O75695|XRP2_HUMAN	RP2	XRP2_HUMAN Protein XRP2	6	5.8395	6.00211	5.82276	6.11649	7.28493	7.18796	6.76654	6.29456	5.94521	6.8835	1.15782	0.211413	0.0235369	0.0657425
sp|O43488|ARK72_HUMAN	AKR7A2	ARK72_HUMAN Aflatoxin B1 aldehyde reductase member 2	16	5.36685	5.55181	5.63296	6.11429	5.90455	6.42402	7.17548	6.73158	5.66648	6.55891	1.15749	0.211003	0.0562316	0.0814582
sp|P17612|KAPCA_HUMAN	PRKACA	KAPCA_HUMAN cAMP-dependent protein kinase catalytic subunit alpha	4	5.67655	5.128	6.08699	6.46278	6.1025	6.5084	6.60798	7.79837	5.83858	6.75431	1.15684	0.210191	0.0980169	0.108015
sp|O94925-3|GLSK_HUMAN	GLS	GLSK_HUMAN Isoform 3 of Glutaminase kidney isoform, mitochondrial	3	5.14047	5.71967	6.13905	6.76193	6.3448	7.49082	7.42572	6.21779	5.94028	6.86978	1.15647	0.209733	0.115122	0.0992783
sp|O75362|ZN217_HUMAN	ZNF217	ZN217_HUMAN Zinc finger protein 217	4	5.05103	5.20117	5.96043	6.04131	6.11926	5.66546	6.5653	7.38564	5.56349	6.43392	1.15645	0.209708	0.0916377	0.113952
sp|Q9Y3A0|COQ4_HUMAN	COQ4	COQ4_HUMAN Ubiquinone biosynthesis protein COQ4 homolog, mitochondrial	3	5.83253	5.72185	5.97074	6.29175	6.398	6.34605	7.31717	7.47007	5.95422	6.88282	1.15596	0.209088	0.0414806	0.0862279
sp|Q96DW6|S2538_HUMAN	SLC25A38	S2538_HUMAN Solute carrier family 25 member 38	1	5.91927	4.87089	7.523	5.5774	6.09646	7.95433	6.54462	6.99897	5.97264	6.8986	1.15503	0.207934	0.187854	0.115159
sp|P63272|SPT4H_HUMAN	SUPT4H1	SPT4H_HUMAN Transcription elongation factor SPT4	3	5.70056	5.06735	5.20534	6.36003	6.73371	6.559	5.57676	6.92505	5.58332	6.44863	1.15498	0.207869	0.104748	0.0930682
sp|P14316|IRF2_HUMAN	IRF2	IRF2_HUMAN Interferon regulatory factor 2	1	5.18973	5.60009	6.16448	6.69532	5.83486	7.51558	6.84855	7.11442	5.9124	6.82835	1.15492	0.207792	0.11118	0.104979
sp|Q9UPM9|B9D1_HUMAN	B9D1	B9D1_HUMAN B9 domain-containing protein 1	2	5.68748	5.41579	5.5123	6.56703	6.33007	6.19609	7.36888	6.87594	5.79565	6.69275	1.15479	0.207628	0.0908277	0.0804127
sp|O75844|FACE1_HUMAN	ZMPSTE24	FACE1_HUMAN CAAX prenyl protease 1 homolog	19	5.37436	5.57372	5.9157	6.11378	6.27139	6.30042	7.25927	6.7012	5.74439	6.63307	1.1547	0.207523	0.0578981	0.069537
sp|Q6AZZ1|TRI68_HUMAN	TRIM68	TRI68_HUMAN E3 ubiquitin-protein ligase TRIM68	2	5.12603	5.4848	7.03265	6.67472	6.08553	6.71451	7.97697	7.30143	6.07955	7.01961	1.15463	0.207426	0.15092	0.115193
sp|O15194|CTDSL_HUMAN	CTDSPL	CTDSL_HUMAN CTD small phosphatase-like protein	1	5.73798	5.32695	5.63259	6.38393	5.64808	6.92293	6.96442	7.10754	5.77036	6.66074	1.1543	0.207021	0.0770555	0.102049
sp|Q9BUB4|ADAT1_HUMAN	ADAT1	ADAT1_HUMAN tRNA-specific adenosine deaminase 1	1	6.12758	6.25509	5.80361	6.21713	6.94207	7.64228	6.31616	7.25206	6.10085	7.03814	1.15363	0.206184	0.0336421	0.0795847
sp|Q7L2Z9|CENPQ_HUMAN	CENPQ	CENPQ_HUMAN Centromere protein Q	1	5.82439	5.30371	6.78507	6.24708	6.05057	7.88521	7.14404	6.78951	6.04006	6.96733	1.15352	0.206043	0.104125	0.109489
sp|Q5JTW2-2|CEP78_HUMAN	CEP78	CEP78_HUMAN Isoform 2 of Centrosomal protein of 78 kDa	4	5.70806	5.16876	6.11321	6.45213	6.5751	6.60808	6.64482	7.20696	5.86054	6.75874	1.15326	0.205721	0.0942675	0.0444117
sp|Q96B77|TM186_HUMAN	TMEM186	TM186_HUMAN Transmembrane protein 186	1	5.06451	5.74979	5.93104	6.70145	6.27378	6.95011	6.86285	6.95151	5.8617	6.75956	1.15317	0.205611	0.114781	0.0483018
sp|Q6UWY0|ARSK_HUMAN	ARSK	ARSK_HUMAN Arylsulfatase K	3	5.44676	5.58026	5.58483	6.32845	6.74223	5.94778	6.54429	7.21415	5.73508	6.61211	1.15293	0.205299	0.0698741	0.0793249
sp|A2RUC4|TYW5_HUMAN	TYW5	TYW5_HUMAN tRNA wybutosine-synthesizing protein 5	2	4.93171	5.03563	6.57784	5.98901	6.45341	6.1432	6.611	6.75841	5.63355	6.49151	1.15229	0.204509	0.140075	0.0405904
sp|Q9Y5U9|IR3IP_HUMAN	IER3IP1	IR3IP_HUMAN Immediate early response 3-interacting protein 1	1	6.09277	6.33435	5.84066	5.68965	5.96906	6.49874	7.16354	7.97379	5.98936	6.90128	1.15226	0.204463	0.0473862	0.125491
sp|Q12770|SCAP_HUMAN	SCAP	SCAP_HUMAN Sterol regulatory element-binding protein cleavage-activating protein	1	4.33461	5.25021	7.13013	6.57595	6.14623	6.35101	6.8587	7.4768	5.82273	6.70819	1.15207	0.204228	0.217665	0.0884767
sp|Q8WYK2-2|JDP2_HUMAN	JDP2	JDP2_HUMAN Isoform 2 of Jun dimerization protein 2	1	5.43793	7.21962	4.92352	6.03143	7.80526	6.41916	7.04582	5.92971	5.90313	6.79999	1.15193	0.204053	0.16729	0.119273
sp|P12429|ANXA3_HUMAN	ANXA3	ANXA3_HUMAN Annexin A3	48	5.44289	5.46309	5.965	6.30348	6.15243	6.24625	6.82891	7.46665	5.79361	6.67356	1.15188	0.203993	0.0719705	0.0910361
sp|Q96BZ9-3|TBC20_HUMAN	TBC1D20	TBC20_HUMAN Isoform 3 of TBC1 domain family member 20	4	5.33862	5.83772	6.17946	6.29494	6.71779	6.4243	7.39346	6.70256	5.91268	6.80953	1.15168	0.203741	0.0725779	0.0605037
sp|Q9Y2H1|ST38L_HUMAN	STK38L	ST38L_HUMAN Serine/threonine-protein kinase 38-like	4	5.27191	5.97038	6.10097	6.49787	6.04799	6.8483	7.65189	6.89842	5.96028	6.86165	1.15123	0.203175	0.0857007	0.0954943
sp|P31629|ZEP2_HUMAN	HIVEP2	ZEP2_HUMAN Transcription factor HIVEP2	2	6.31998	5.84624	5.72323	6.07737	6.51152	7.22146	7.13379	6.724	5.9917	6.89769	1.15121	0.203147	0.0439822	0.0487966
sp|Q9NRX2|RM17_HUMAN	MRPL17	RM17_HUMAN 39S ribosomal protein L17, mitochondrial	12	5.26568	5.29723	6.25965	6.51723	6.11704	6.11476	7.30667	7.31831	5.83495	6.7142	1.15069	0.202495	0.111027	0.102897
sp|Q9BVI0|PHF20_HUMAN	PHF20	PHF20_HUMAN PHD finger protein 20	1	5.69621	5.63735	6.3882	5.48422	5.82956	7.88676	6.349	6.62846	5.8015	6.67345	1.1503	0.202007	0.0691568	0.130965
sp|Q7L1V2|MON1B_HUMAN	MON1B	MON1B_HUMAN Vacuolar fusion protein MON1 homolog B	1	5.42319	6.26183	5.00037	5.9697	5.29591	6.80065	6.45878	7.50265	5.66377	6.5145	1.1502	0.201891	0.0993169	0.141423
sp|Q9BQ48|RM34_HUMAN	MRPL34	RM34_HUMAN 39S ribosomal protein L34, mitochondrial	2	5.34351	4.94135	6.79636	6.52783	6.52105	6.24151	6.63646	7.75392	5.90226	6.78824	1.15011	0.201768	0.152368	0.0979342
sp|P82663|RT25_HUMAN	MRPS25	RT25_HUMAN 28S ribosomal protein S25, mitochondrial	9	5.12008	5.22019	6.08908	6.79201	6.09257	6.41305	7.01294	7.18693	5.80534	6.67637	1.15004	0.201684	0.135853	0.0765751
sp|Q9NS73|MBIP1_HUMAN	MBIP	MBIP1_HUMAN MAP3K12-binding inhibitory protein 1	1	5.06691	5.5051	5.95737	6.39007	6.19734	6.39612	7.35893	6.40561	5.72986	6.5895	1.15003	0.201668	0.0996297	0.0791962
sp|O60613|SEP15_HUMAN	2021-09-15	SEP15_HUMAN 15 kDa selenoprotein	4	5.84423	5.43687	5.41399	6.3686	6.24773	6.13109	7.25367	6.87275	5.76592	6.62631	1.14922	0.200654	0.0776574	0.0799927
sp|P0CG29|GST2_HUMAN	GSTT2	GST2_HUMAN Glutathione S-transferase theta-2	7	5.23175	5.52689	5.88218	6.41604	6.07472	6.64025	6.76547	6.99441	5.76421	6.61871	1.14824	0.199426	0.0883824	0.0591029
sp|Q9HCI5|MAGE1_HUMAN	MAGEE1	MAGE1_HUMAN Melanoma-associated antigen E1	2	4.76411	5.33867	6.39017	6.40796	6.51157	5.44033	6.71395	7.62316	5.72523	6.57225	1.14795	0.199055	0.141951	0.136358
sp|Q96BR1|SGK3_HUMAN	SGK3	SGK3_HUMAN Serine/threonine-protein kinase Sgk3	1	5.50167	5.83784	5.3315	6.32767	6.60957	6.56042	6.54026	6.68552	5.74967	6.59894	1.14771	0.198756	0.0763565	0.00979599
sp|Q8IXM3|RM41_HUMAN	MRPL41	RM41_HUMAN 39S ribosomal protein L41, mitochondrial	10	5.42809	5.13177	6.3639	6.5728	6.47896	5.96919	7.25887	7.25381	5.87414	6.74021	1.14744	0.198415	0.119493	0.0936578
sp|Q16540|RM23_HUMAN	MRPL23	RM23_HUMAN 39S ribosomal protein L23, mitochondrial	10	5.24387	5.74245	5.91898	6.74738	6.47783	6.41481	6.99881	7.24619	5.91317	6.78441	1.14734	0.198292	0.105749	0.0595577
sp|P84157-3|MXRA7_HUMAN	MXRA7	MXRA7_HUMAN Isoform 3 of Matrix-remodeling-associated protein 7	1	5.9343	6.07154	4.62764	5.40672	6.11847	6.99753	6.93824	5.22956	5.51005	6.32095	1.14717	0.198076	0.118759	0.131444
sp|Q19AV6|ZSWM7_HUMAN	ZSWIM7	ZSWM7_HUMAN Zinc finger SWIM domain-containing protein 7	1	5.69757	4.4866	6.94353	6.12871	7.08762	6.15015	6.88065	6.55445	5.8141	6.66822	1.1469	0.197745	0.176255	0.0613675
sp|Q8IUH3|RBM45_HUMAN	RBM45	RBM45_HUMAN RNA-binding protein 45	1	6.19504	5.54155	6.04155	5.56177	6.29185	5.99276	7.17667	7.30663	5.83498	6.69198	1.14687	0.197706	0.0571033	0.09691
tr|B4DTU4|B4DTU4_HUMAN	LIG1	B4DTU4_HUMAN DNA ligase	1	5.97968	5.68036	5.72156	5.66985	6.43806	6.10929	6.89916	6.98408	5.76286	6.60765	1.14659	0.197351	0.0253793	0.0620186
sp|Q9H4L4|SENP3_HUMAN	SENP3	SENP3_HUMAN Sentrin-specific protease 3	1	4.60731	5.10546	7.54406	5.66805	5.95125	6.35395	6.49374	7.47871	5.73122	6.56941	1.14625	0.196922	0.224017	0.0986932
sp|P58004|SESN2_HUMAN	SESN2	SESN2_HUMAN Sestrin-2	1	5.57363	5.71681	6.5298	6.0157	6.57443	6.32031	7.21284	7.21244	5.95898	6.83	1.14617	0.19682	0.070946	0.0664488
sp|P63165|SUMO1_HUMAN	SUMO1	SUMO1_HUMAN Small ubiquitin-related modifier 1	11	5.56949	5.75519	5.79447	5.48771	5.64957	7.91772	7.21533	5.12206	5.65172	6.47617	1.14588	0.196452	0.0259933	0.202143
tr|A6PVN8|A6PVN8_HUMAN	PPP2R4	A6PVN8_HUMAN Serine/threonine-protein phosphatase 2A activator (Fragment)	2	5.65606	5.4357	6.71576	6.60094	6.8675	6.35054	6.73064	8.0195	6.10211	6.99205	1.14584	0.196405	0.106561	0.102836
sp|Q86TS9|RM52_HUMAN	MRPL52	RM52_HUMAN 39S ribosomal protein L52, mitochondrial	3	5.08943	5.95875	6.87751	5.88782	6.10145	7.47545	7.20296	6.50542	5.95338	6.82132	1.14579	0.196343	0.122851	0.0923901
sp|P48047|ATPO_HUMAN	ATP5O	ATPO_HUMAN ATP synthase subunit O, mitochondrial	17	5.43275	5.35126	5.80354	6.33527	6.19827	6.04684	7.19224	6.82166	5.73071	6.56475	1.14554	0.196028	0.0782693	0.081667
sp|P08758|ANXA5_HUMAN	ANXA5	ANXA5_HUMAN Annexin A5	56	5.66388	5.45118	5.91045	6.20406	6.10269	6.17353	7.40789	6.91731	5.80739	6.65036	1.14515	0.195541	0.0558371	0.0940019
sp|Q7L1W4|LRC8D_HUMAN	LRRC8D	LRC8D_HUMAN Leucine-rich repeat-containing protein 8D	3	5.16258	5.78284	5.75474	5.80368	6.34832	6.41202	7.60353	5.39979	5.62596	6.44091	1.14486	0.195166	0.0550253	0.140163
sp|P10746|HEM4_HUMAN	UROS	HEM4_HUMAN Uroporphyrinogen-III synthase	2	5.68088	5.90582	6.10077	6.20579	6.65382	6.50432	6.87312	7.3194	5.97332	6.83766	1.1447	0.194972	0.0387058	0.0519299
sp|P50148|GNAQ_HUMAN	GNAQ	GNAQ_HUMAN Guanine nucleotide-binding protein G(q) subunit alpha	2	5.79229	5.29146	5.60587	6.71493	6.49831	5.31723	7.57522	7.39387	5.85114	6.69616	1.14442	0.194616	0.104565	0.15424
sp|Q96EW2|HBAP1_HUMAN	HSPBAP1	HBAP1_HUMAN HSPB1-associated protein 1	2	5.11517	5.90896	6.04942	6.01824	6.25153	6.36561	7.036	6.7659	5.77295	6.60476	1.14409	0.194198	0.0766739	0.0548623
sp|Q86TP1|PRUNE_HUMAN	PRUNE	PRUNE_HUMAN Protein prune homolog	2	5.49347	5.44792	5.87061	7.03435	6.9523	7.39489	6.65076	6.27943	5.96159	6.81935	1.14388	0.193937	0.124101	0.0692411
sp|Q05513|KPCZ_HUMAN	PRKCZ	KPCZ_HUMAN Protein kinase C zeta type	2	5.3201	5.50403	6.29912	5.93273	6.27715	6.57295	6.53884	6.97782	5.76399	6.59169	1.1436	0.193579	0.0762475	0.0438967
sp|Q13017|RHG05_HUMAN	ARHGAP5	RHG05_HUMAN Rho GTPase-activating protein 5	13	5.7529	5.56737	6.12899	6.12551	6.01077	6.45883	7.59104	6.88869	5.89369	6.73733	1.14314	0.193006	0.0475299	0.0998322
sp|Q8WVF1|OSCP1_HUMAN	OSCP1	OSCP1_HUMAN Protein OSCP1	2	5.96865	5.33459	6.74765	6.07542	7.08329	5.94122	7.95828	6.59372	6.03158	6.89413	1.14301	0.192833	0.0959332	0.123264
sp|O95466-3|FMNL_HUMAN	FMNL1	FMNL_HUMAN Isoform 3 of Formin-like protein 1	1	6.20591	5.4537	5.40321	6.27411	6.99409	6.02481	5.84475	7.80928	5.83423	6.66823	1.14295	0.192762	0.0805299	0.136906
sp|P60709|ACTB_HUMAN	ACTB	ACTB_HUMAN Actin, cytoplasmic 1	75	5.36055	5.51993	5.919	6.29985	6.32977	6.4787	6.64278	6.94316	5.77483	6.5986	1.14265	0.192381	0.0729923	0.0398389
tr|F8W0P7|F8W0P7_HUMAN	ATP5B	F8W0P7_HUMAN ATP synthase subunit beta, mitochondrial (Fragment)	1	5.75114	5.86405	6.05961	6.16192	6.57035	6.20577	7.04492	7.41261	5.95918	6.80841	1.14251	0.192205	0.031172	0.077759
sp|P24666-2|PPAC_HUMAN	ACP1	PPAC_HUMAN Isoform 2 of Low molecular weight phosphotyrosine protein phosphatase	1	6.87503	4.32541	5.7339	7.65947	8.02069	6.04671	8.37128	5.65846	6.14845	7.02428	1.14245	0.192128	0.235812	0.194997
sp|Q8N8D1|PDCD7_HUMAN	PDCD7	PDCD7_HUMAN Programmed cell death protein 7	1	6.41065	6.39222	5.5222	5.42988	7.438	6.01406	6.94657	6.73895	5.93874	6.78439	1.1424	0.192064	0.0901972	0.087159
sp|Q96LU5|IMP1L_HUMAN	IMMP1L	IMP1L_HUMAN Mitochondrial inner membrane protease subunit 1	1	4.91274	5.39211	6.50202	6.3226	6.59922	6.33745	7.05844	6.42786	5.78237	6.60574	1.14239	0.19206	0.130883	0.048553
sp|Q9BPW8|NIPS1_HUMAN	NIPSNAP1	NIPS1_HUMAN Protein NipSnap homolog 1	14	5.37287	5.18165	6.10694	6.61239	5.83872	6.12955	7.18416	7.42314	5.81846	6.64389	1.14186	0.191391	0.113901	0.116975
sp|Q8WTS1|ABHD5_HUMAN	ABHD5	ABHD5_HUMAN 1-acylglycerol-3-phosphate O-acyltransferase ABHD5	3	5.46722	6.11351	5.95189	6.04474	6.43512	6.51072	6.82093	7.12776	5.89434	6.72363	1.14069	0.189911	0.0495978	0.0471385
sp|Q13084|RM28_HUMAN	MRPL28	RM28_HUMAN 39S ribosomal protein L28, mitochondrial	10	5.08422	5.54757	6.2984	6.63926	6.40392	6.07569	7.17493	7.22542	5.89236	6.71999	1.14046	0.189613	0.119792	0.0849412
sp|P01116|RASK_HUMAN	KRAS	RASK_HUMAN GTPase KRas	3	5.51331	5.69006	5.55913	5.75221	6.25177	6.65725	6.04825	6.71585	5.62868	6.41828	1.14028	0.189391	0.0197768	0.0501087
sp|Q9H1C7|CYTM1_HUMAN	CYSTM1	CYTM1_HUMAN Cysteine-rich and transmembrane domain-containing protein 1	1	6.61775	3.99666	5.39599	9.16606	3.05797	9.05149	6.98779	9.59575	6.29411	7.17325	1.13968	0.188623	0.348541	0.413283
sp|P17252|KPCA_HUMAN	PRKCA	KPCA_HUMAN Protein kinase C alpha type	7	5.46278	5.40487	6.04493	6.01192	5.90892	6.0242	6.9943	7.19149	5.73113	6.52973	1.13934	0.188204	0.0600876	0.100608
sp|P20290-2|BTF3_HUMAN	BTF3	BTF3_HUMAN Isoform 2 of Transcription factor BTF3	1	6.3287	3.84947	5.77158	6.62377	5.07381	4.07269	4.23141	12.3405	5.64338	6.4296	1.13932	0.18817	0.220975	0.616681
sp|Q9Y2K2|SIK3_HUMAN	SIK3	SIK3_HUMAN Serine/threonine-protein kinase SIK3	1	6.62898	4.96722	5.30563	5.23486	6.6998	6.48165	6.17812	5.85217	5.53417	6.30293	1.13891	0.187656	0.134488	0.0585245
sp|O75718|CRTAP_HUMAN	CRTAP	CRTAP_HUMAN Cartilage-associated protein	7	5.42048	5.56117	5.97531	6.22283	6.01628	6.2209	6.88268	7.27839	5.79495	6.59956	1.13885	0.187575	0.0638325	0.0885512
sp|Q15147-4|PLCB4_HUMAN	PLCB4	PLCB4_HUMAN Isoform 3 of 1-phosphatidylinositol 4,5-bisphosphate phosphodiesterase beta-4	1	4.90088	5.0071	6.40264	6.80546	5.96298	6.21694	6.59948	7.54536	5.77902	6.58119	1.13881	0.187524	0.167455	0.105449
sp|Q96RF0-2|SNX18_HUMAN	SNX18	SNX18_HUMAN Isoform 2 of Sorting nexin-18	6	5.52006	5.70268	6.03025	6.64874	6.20918	6.37841	6.94975	7.68108	5.97543	6.80461	1.13876	0.187468	0.0830098	0.0976828
sp|Q9UHB7|AFF4_HUMAN	AFF4	AFF4_HUMAN AF4/FMR2 family member 4	1	6.33946	5.86438	5.83993	5.90595	7.40066	6.82518	5.8536	7.18086	5.98743	6.81507	1.13823	0.186793	0.03946	0.100283
sp|P46020|KPB1_HUMAN	PHKA1	KPB1_HUMAN Phosphorylase b kinase regulatory subunit alpha, skeletal muscle isoform	3	5.96866	5.58443	6.03894	5.89626	6.48124	6.43755	6.8825	6.93289	5.87207	6.68355	1.13819	0.186744	0.03413	0.0389396
sp|P62312|LSM6_HUMAN	LSM6	LSM6_HUMAN U6 snRNA-associated Sm-like protein LSm6	10	5.44486	5.96148	5.44554	5.61507	6.24356	6.83388	6.70738	5.78502	5.61674	6.39246	1.13811	0.186639	0.0433311	0.0747608
sp|Q6DN03|H2B2C_HUMAN	HIST2H2BC	H2B2C_HUMAN Putative histone H2B type 2-C	1	4.78374	4.88111	6.40691	7.16157	6.48488	7.18079	6.0002	6.77501	5.80833	6.61022	1.13806	0.186574	0.201248	0.0751619
sp|Q07021|C1QBP_HUMAN	C1QBP	C1QBP_HUMAN Complement component 1 Q subcomponent-binding protein, mitochondrial	61	5.45187	5.79971	5.78884	6.26488	6.34927	6.32978	6.6392	7.20322	5.82633	6.63037	1.138	0.186503	0.0573254	0.061425
sp|Q8NBL1|PGLT1_HUMAN	POGLUT1	PGLT1_HUMAN Protein O-glucosyltransferase 1	12	5.28582	5.59818	5.87068	6.16362	5.87089	6.60478	7.03112	6.57201	5.72958	6.5197	1.1379	0.186377	0.0654975	0.0736911
sp|Q9NPJ3|ACO13_HUMAN	ACOT13	ACO13_HUMAN Acyl-coenzyme A thioesterase 13	7	5.45276	5.39225	5.85336	5.92483	6.09627	6.62265	6.51868	6.48936	5.6558	6.43174	1.13719	0.185478	0.0481073	0.0358912
sp|Q00536-2|CDK16_HUMAN	CDK16	CDK16_HUMAN Isoform 2 of Cyclin-dependent kinase 16	8	5.10718	5.14197	5.90861	6.24211	5.93917	6.25458	6.59271	6.67602	5.59997	6.36562	1.13672	0.184883	0.101027	0.0530493
sp|Q7Z6J9|SEN54_HUMAN	TSEN54	SEN54_HUMAN tRNA-splicing endonuclease subunit Sen54	7	5.17443	5.46876	6.22274	6.61021	6.21547	5.89473	6.88329	7.68527	5.86904	6.66969	1.13642	0.184496	0.112899	0.118813
sp|Q96GC5|RM48_HUMAN	MRPL48	RM48_HUMAN 39S ribosomal protein L48, mitochondrial	10	5.28896	5.36204	6.26101	6.94016	5.98561	6.27119	7.56473	7.28262	5.96304	6.77604	1.13634	0.184393	0.132016	0.112982
sp|A6ND36|FA83G_HUMAN	FAM83G	FA83G_HUMAN Protein FAM83G	14	5.93135	5.91854	6.30981	6.27839	6.15318	6.26859	7.82244	7.51932	6.10952	6.94088	1.13608	0.184059	0.0349588	0.122933
sp|Q5W111|SPRY7_HUMAN	SPRYD7	SPRY7_HUMAN SPRY domain-containing protein 7	4	5.39371	5.52413	6.02854	6.76128	6.72753	6.58712	6.63546	6.98297	5.92691	6.73327	1.13605	0.184026	0.1046	0.0261925
sp|Q567U6|CCD93_HUMAN	CCDC93	CCD93_HUMAN Coiled-coil domain-containing protein 93	19	5.7963	5.69804	6.18894	6.43375	6.6767	6.31219	7.21829	7.18629	6.02926	6.84837	1.13586	0.18378	0.0569005	0.0635364
sp|Q9HBL8|NMRL1_HUMAN	NMRAL1	NMRL1_HUMAN NmrA-like family domain-containing protein 1	8	5.36791	5.67866	6.18901	6.12472	6.13179	6.07178	7.05015	7.27624	5.84007	6.63249	1.13569	0.183564	0.0664479	0.0935096
sp|Q9NRG7|D39U1_HUMAN	SDR39U1	D39U1_HUMAN Epimerase family protein SDR39U1	4	5.45112	5.58819	6.12096	6.17894	5.79926	6.13368	7.42797	7.13483	5.8348	6.62394	1.13525	0.183005	0.0632307	0.117843
sp|P13051|UNG_HUMAN	UNG	UNG_HUMAN Uracil-DNA glycosylase	9	5.70083	5.62342	5.70748	6.32929	6.29128	6.30788	6.80978	7.10872	5.84025	6.62941	1.13512	0.18285	0.0562045	0.0603362
sp|Q9H0F7|ARL6_HUMAN	ARL6	ARL6_HUMAN ADP-ribosylation factor-like protein 6	3	5.39971	6.20354	6.30725	5.59844	6.91074	5.63137	7.52609	6.61099	5.87723	6.6698	1.13485	0.182505	0.0759112	0.118469
sp|P49736|MCM2_HUMAN	MCM2	MCM2_HUMAN DNA replication licensing factor MCM2	60	5.65189	5.47553	6.12527	6.33121	6.25569	6.49885	7.1593	6.8463	5.89597	6.69003	1.13468	0.182283	0.0677267	0.059154
sp|Q9H6H4|REEP4_HUMAN	REEP4	REEP4_HUMAN Receptor expression-enhancing protein 4	3	5.26882	5.82578	6.01037	6.43028	5.87232	6.53599	6.8356	7.45961	5.88381	6.67588	1.13462	0.182207	0.0818759	0.0987961
sp|P51965|UB2E1_HUMAN	UBE2E1	UB2E1_HUMAN Ubiquitin-conjugating enzyme E2 E1	2	5.78598	5.47337	6.06898	6.23206	6.04455	6.30949	7.62042	6.75731	5.8901	6.68294	1.13461	0.182192	0.0566012	0.10336
sp|Q96DC8|ECHD3_HUMAN	ECHDC3	ECHD3_HUMAN Enoyl-CoA hydratase domain-containing protein 3, mitochondrial	2	5.79823	5.13481	6.93932	5.45282	6.59927	6.05724	7.1941	6.60244	5.83129	6.61326	1.1341	0.181546	0.134927	0.0702141
sp|O95273|CCDB1_HUMAN	CCNDBP1	CCDB1_HUMAN Cyclin-D1-binding protein 1	3	5.72131	6.14204	4.76468	5.95582	6.10748	6.52594	6.33784	6.63866	5.64596	6.40248	1.13399	0.181411	0.108435	0.0363205
sp|Q2TAY7|SMU1_HUMAN	SMU1	SMU1_HUMAN WD40 repeat-containing protein SMU1	13	5.36179	5.52443	6.19944	6.5302	6.15325	6.50678	7.08059	7.03806	5.90397	6.69467	1.13393	0.181329	0.0936684	0.0665387
sp|Q8WVL7|ANR49_HUMAN	ANKRD49	ANR49_HUMAN Ankyrin repeat domain-containing protein 49	2	5.40262	6.63263	5.92715	5.99128	6.05014	7.47007	6.76301	6.87453	5.98842	6.78944	1.13376	0.181117	0.0841559	0.0857884
sp|Q9NUP1|BL1S4_HUMAN	BLOC1S4	BL1S4_HUMAN Biogenesis of lysosome-related organelles complex 1 subunit 4	4	5.38435	5.64906	6.2121	6.34446	6.37253	7.25214	6.25988	6.84575	5.89749	6.68257	1.13312	0.180302	0.07732	0.0683476
sp|Q9Y291|RT33_HUMAN	MRPS33	RT33_HUMAN 28S ribosomal protein S33, mitochondrial	5	5.3181	5.34319	6.38903	6.42758	6.3831	5.98161	6.97617	7.25501	5.86947	6.64897	1.13281	0.1799	0.106052	0.0864152
sp|Q6STE5|SMRD3_HUMAN	SMARCD3	SMRD3_HUMAN SWI/SNF-related matrix-associated actin-dependent regulator of chromatin subfamily D member 3	2	5.52039	5.63386	6.32435	6.29195	6.3055	6.04838	7.05058	7.51931	5.94264	6.73094	1.13265	0.179705	0.0714831	0.100419
tr|F8VV04|F8VV04_HUMAN	SART3	F8VV04_HUMAN Squamous cell carcinoma antigen recognized by T-cells 3 (Fragment)	3	5.26258	5.46048	5.99694	7.24017	6.88833	6.83297	6.5926	6.82166	5.99004	6.78389	1.13253	0.179547	0.148461	0.0192827
tr|K7EKQ2|K7EKQ2_HUMAN	CDC37	K7EKQ2_HUMAN Hsp90 co-chaperone Cdc37 (Fragment)	1	5.1671	7.17895	4.69968	6.45093	6.39837	7.52839	6.44554	6.23695	5.87416	6.65231	1.13247	0.179472	0.19446	0.0888174
sp|Q3B7T1|EDRF1_HUMAN	EDRF1	EDRF1_HUMAN Erythroid differentiation-related factor 1	12	5.77597	5.92394	6.7039	6.04336	5.81742	6.06341	8.25443	7.54886	6.11179	6.92103	1.13241	0.179391	0.0670195	0.169438
sp|P48506|GSH1_HUMAN	GCLC	GSH1_HUMAN Glutamate--cysteine ligase catalytic subunit	32	5.76202	5.74999	6.08002	6.50866	6.40135	6.48801	7.1685	7.22639	6.02517	6.82106	1.13209	0.178994	0.0592046	0.0640203
sp|Q5TA31|RN187_HUMAN	RNF187	RN187_HUMAN E3 ubiquitin-protein ligase RNF187	3	6.00933	5.976	5.72543	5.80056	6.41918	6.85458	6.46205	6.88101	5.87783	6.65421	1.13209	0.178983	0.0232704	0.0371927
sp|Q8N945|PRLD2_HUMAN	PRELID2	PRLD2_HUMAN PRELI domain-containing protein 2	1	6.34876	5.89757	5.11501	5.94093	6.70651	6.52209	6.76255	6.38477	5.82557	6.59398	1.1319	0.178751	0.0884834	0.0262695
sp|Q5SVS4|KMCP1_HUMAN	SLC25A30	KMCP1_HUMAN Kidney mitochondrial carrier protein 1	2	5.74739	5.58343	6.33878	6.52704	6.10681	6.79453	7.88437	6.58512	6.04916	6.84271	1.13118	0.177832	0.0751652	0.109858
sp|P17706|PTN2_HUMAN	PTPN2	PTN2_HUMAN Tyrosine-protein phosphatase non-receptor type 2	8	5.48136	5.53338	6.15985	6.41728	6.06099	6.35703	7.21953	7.04539	5.89797	6.67074	1.13102	0.177628	0.0786021	0.0826422
sp|Q9H1P3|OSBL2_HUMAN	OSBPL2	OSBL2_HUMAN Oxysterol-binding protein-related protein 2	6	5.46066	5.89882	6.21131	6.48696	6.35593	6.23484	7.04592	7.56898	6.01444	6.80142	1.13085	0.177406	0.0732374	0.0917564
sp|Q5SGD2|PPM1L_HUMAN	PPM1L	PPM1L_HUMAN Protein phosphatase 1L	3	5.35675	5.86764	5.9047	6.15832	6.09373	6.43543	6.60897	7.19533	5.82185	6.58337	1.1308	0.177347	0.0576968	0.0699822
sp|Q96EY7|PTCD3_HUMAN	PTCD3	PTCD3_HUMAN Pentatricopeptide repeat domain-containing protein 3, mitochondrial	29	5.2172	5.47895	6.00952	6.36829	6.01981	6.37069	6.85218	6.83847	5.76849	6.52029	1.13033	0.176742	0.0898338	0.061618
sp|Q9BUV8-5|CT024_HUMAN	C20orf24	CT024_HUMAN Isoform 5 of Uncharacterized protein C20orf24	1	5.26535	4.7767	7.26115	6.07876	7.41713	5.48223	6.62399	6.90201	5.84549	6.60634	1.13016	0.176527	0.185763	0.123863
sp|P19793|RXRA_HUMAN	RXRA	RXRA_HUMAN Retinoic acid receptor RXR-alpha	8	5.9055	5.844	6.09913	6.27804	6.31321	6.61573	6.97177	7.36455	6.03167	6.81632	1.13009	0.176435	0.0326555	0.0665903
sp|Q6Y288|B3GLT_HUMAN	B3GALTL	B3GLT_HUMAN Beta-1,3-glucosyltransferase	6	5.29968	6.00566	6.18585	6.25335	6.36743	6.62247	6.67549	7.1653	5.93614	6.70767	1.12997	0.176288	0.0736159	0.0497055
sp|Q3KQV9|UAP1L_HUMAN	UAP1L1	UAP1L_HUMAN UDP-N-acetylhexosamine pyrophosphorylase-like protein 1	10	5.56551	5.4855	6.38421	6.55426	6.18987	6.28493	7.25098	7.38059	5.99737	6.77659	1.12993	0.17623	0.0917466	0.0923848
sp|Q8NHU3|SMS2_HUMAN	SGMS2	SMS2_HUMAN Phosphatidylcholine:ceramide cholinephosphotransferase 2	1	5.79196	6.51619	5.15476	5.60805	6.2647	7.06324	7.16092	5.5753	5.76774	6.51604	1.12974	0.175989	0.0981801	0.114278
tr|G3V392|G3V392_HUMAN	NDRG2	G3V392_HUMAN Protein NDRG2 (Fragment)	1	4.89757	5.70768	6.30024	6.71417	5.48347	7.49901	6.63361	7.06383	5.90491	6.66998	1.12956	0.175766	0.133519	0.129884
sp|Q6ZS86|GLPK5_HUMAN	GK5	GLPK5_HUMAN Putative glycerol kinase 5	1	6.63715	6.31767	4.99547	4.27852	5.93679	6.10944	6.44653	6.61585	5.5572	6.27715	1.12955	0.175751	0.19971	0.0493065
sp|Q9HCL2|GPAT1_HUMAN	GPAM	GPAT1_HUMAN Glycerol-3-phosphate acyltransferase 1, mitochondrial	1	5.81244	5.30051	5.79156	6.32957	6.04216	6.62367	6.99981	6.57577	5.80852	6.56035	1.12944	0.175603	0.0723534	0.0600697
sp|Q02252|MMSA_HUMAN	ALDH6A1	MMSA_HUMAN Methylmalonate-semialdehyde dehydrogenase [acylating], mitochondrial	22	5.73728	5.82002	6.16737	6.03401	6.5886	6.40359	6.79617	7.04553	5.93967	6.70847	1.12944	0.175602	0.0331095	0.0411504
sp|Q9BYD6|RM01_HUMAN	MRPL1	RM01_HUMAN 39S ribosomal protein L1, mitochondrial	10	5.35471	5.3337	6.19297	6.6914	6.19012	6.36263	7.14522	6.92498	5.8932	6.65574	1.12939	0.175549	0.112983	0.0680156
sp|O43674|NDUB5_HUMAN	NDUFB5	NDUB5_HUMAN NADH dehydrogenase [ubiquinone] 1 beta subcomplex subunit 5, mitochondrial	3	6.12966	5.71509	6.20877	6.10055	6.38318	6.49509	7.31732	7.08333	6.03852	6.81973	1.12937	0.17552	0.0365012	0.0662856
sp|Q9ULD0|OGDHL_HUMAN	OGDHL	OGDHL_HUMAN 2-oxoglutarate dehydrogenase-like, mitochondrial	5	5.38446	5.76225	6.2572	6.50806	6.38038	6.171	7.26145	7.18413	5.97799	6.74924	1.12901	0.175064	0.0840714	0.082135
sp|Q9Y2R9|RT07_HUMAN	MRPS7	RT07_HUMAN 28S ribosomal protein S7, mitochondrial	13	5.7345	5.70771	5.70037	6.29123	6.1957	6.47731	7.02826	6.75581	5.85845	6.61427	1.12901	0.175062	0.0493118	0.0541879
sp|P43353|AL3B1_HUMAN	ALDH3B1	AL3B1_HUMAN Aldehyde dehydrogenase family 3 member B1	2	5.6628	5.42826	6.15433	6.35348	6.98612	6.11561	7.06429	6.47591	5.89972	6.66048	1.12895	0.174981	0.072518	0.0671473
sp|Q96FZ2|HMCES_HUMAN	HMCES	HMCES_HUMAN Embryonic stem cell-specific 5-hydroxymethylcytosine-binding protein	10	5.54887	5.60354	6.16734	6.28542	6.0784	6.211	6.92149	7.43689	5.90129	6.66194	1.1289	0.174912	0.0642434	0.0954004
sp|Q9H939|PPIP2_HUMAN	PSTPIP2	PPIP2_HUMAN Proline-serine-threonine phosphatase-interacting protein 2	11	5.5328	5.54689	6.02035	6.52717	6.11715	6.43155	6.93158	7.18979	5.9068	6.66752	1.12879	0.174772	0.0798368	0.0725036
sp|P51570|GALK1_HUMAN	GALK1	GALK1_HUMAN Galactokinase	7	5.1619	5.3922	5.81761	6.00733	5.59131	6.0744	7.20377	6.38777	5.59476	6.31431	1.12861	0.174549	0.0690923	0.107288
sp|P01130|LDLR_HUMAN	LDLR	LDLR_HUMAN Low-density lipoprotein receptor	11	6.17756	6.73437	5.87604	6.35216	6.30525	5.76344	8.46555	7.83684	6.28503	7.09277	1.12852	0.174429	0.0570158	0.178811
sp|O95479|G6PE_HUMAN	H6PD	G6PE_HUMAN GDH/6PGL endoplasmic bifunctional protein	3	5.64676	5.39022	6.01612	6.76951	6.07631	6.32752	6.78813	7.67962	5.95565	6.71789	1.12799	0.17375	0.100798	0.105042
sp|Q9BQC6|RT63_HUMAN	MRP63	RT63_HUMAN Ribosomal protein 63, mitochondrial	2	5.4142	5.80242	6.12772	6.02749	6.67909	6.67327	6.42454	6.5797	5.84296	6.58915	1.12771	0.173394	0.0541769	0.0180319
sp|Q9BZK3|NACP1_HUMAN	NACAP1	NACP1_HUMAN Putative nascent polypeptide-associated complex subunit alpha-like protein	1	5.94773	5.77985	6.68142	5.07396	5.77456	6.86434	7.2444	6.59222	5.87074	6.61888	1.12744	0.173045	0.112398	0.094154
sp|Q6Y1H2|HACD2_HUMAN	PTPLB	HACD2_HUMAN Very-long-chain (3R)-3-hydroxyacyl-[acyl-carrier protein] dehydratase 2	1	5.60878	5.50206	5.84129	6.8117	6.31926	6.5205	6.88049	7.07133	5.94096	6.69789	1.12741	0.173012	0.100577	0.0508228
sp|Q96I34|PP16A_HUMAN	PPP1R16A	PP16A_HUMAN Protein phosphatase 1 regulatory subunit 16A	1	6.07979	5.60959	5.99918	6.52663	6.58049	6.15948	7.14339	7.41418	6.0538	6.82438	1.12729	0.172859	0.0621406	0.0825112
sp|P46934-4|NEDD4_HUMAN	NEDD4	NEDD4_HUMAN Isoform 4 of E3 ubiquitin-protein ligase NEDD4	7	5.57163	5.5851	6.57394	6.58747	6.18253	6.6464	7.26824	7.31155	6.07953	6.85218	1.12709	0.172602	0.095197	0.0788117
sp|P11831|SRF_HUMAN	SRF	SRF_HUMAN Serum response factor	1	7.18182	5.00347	5.29296	5.56334	6.86324	6.18443	5.50011	7.41866	5.7604	6.49161	1.12694	0.172408	0.169225	0.128113
sp|Q9NTK5|OLA1_HUMAN	OLA1	OLA1_HUMAN Obg-like ATPase 1	48	5.52146	5.46616	6.07204	6.5214	5.99709	6.13549	7.08452	7.35562	5.89527	6.64318	1.12687	0.172317	0.0846529	0.102003
sp|Q6T4R5|NHS_HUMAN	NHS	NHS_HUMAN Nance-Horan syndrome protein	1	5.65921	5.89181	6.4189	6.6133	5.80046	8.48837	6.55407	6.85463	6.14581	6.92438	1.12668	0.172083	0.0724282	0.163629
sp|Q04725|TLE2_HUMAN	TLE2	TLE2_HUMAN Transducin-like enhancer protein 2	1	5.24554	6.44638	6.63266	6.17472	6.47215	7.13957	6.95424	7.03455	6.12482	6.90013	1.12658	0.171954	0.100511	0.0427872
sp|Q7L2K0|CP059_HUMAN	C16orf59	CP059_HUMAN Uncharacterized protein C16orf59	1	4.79771	7.3571	5.53332	6.62499	3.86612	6.80377	7.54038	9.17682	6.07828	6.84677	1.12643	0.171761	0.186886	0.324363
sp|Q9UQ13|SHOC2_HUMAN	SHOC2	SHOC2_HUMAN Leucine-rich repeat protein SHOC-2	5	5.72852	5.5439	5.86967	6.57838	6.36691	6.25138	6.70275	7.39729	5.93012	6.67958	1.12638	0.171697	0.0762703	0.0771533
sp|Q8NCL4|GALT6_HUMAN	GALNT6	GALT6_HUMAN Polypeptide N-acetylgalactosaminyltransferase 6	5	5.62778	5.82359	5.56812	6.74643	6.53295	6.40629	6.91784	6.8993	5.94148	6.6891	1.12583	0.170989	0.0921682	0.0386839
sp|P30613|KPYR_HUMAN	PKLR	KPYR_HUMAN Pyruvate kinase PKLR	8	5.8681	5.594	6.17386	6.43857	6.66964	6.1376	7.06808	7.22629	6.01863	6.7754	1.12574	0.170871	0.0609282	0.0716465
sp|Q96IY1|NSL1_HUMAN	NSL1	NSL1_HUMAN Kinetochore-associated protein NSL1 homolog	3	5.12179	5.31167	6.19831	6.70013	6.12356	5.84787	7.43512	6.85884	5.83297	6.56635	1.12573	0.170859	0.127641	0.109558
sp|Q9NRN7|ADPPT_HUMAN	AASDHPPT	ADPPT_HUMAN L-aminoadipate-semialdehyde dehydrogenase-phosphopantetheinyl transferase	17	5.41293	5.49085	5.95227	6.55034	6.21547	5.97239	6.78375	7.3701	5.8516	6.58543	1.12541	0.170447	0.0893967	0.0947384
sp|Q969Z3|MOSC2_HUMAN	2021-03-02	MOSC2_HUMAN MOSC domain-containing protein 2, mitochondrial	6	5.79304	5.61889	6.17846	6.19043	6.93145	6.71586	6.69484	6.42056	5.94521	6.69068	1.12539	0.170426	0.0479873	0.0313022
sp|Q03519|TAP2_HUMAN	TAP2	TAP2_HUMAN Antigen peptide transporter 2	5	4.94887	5.63785	5.94701	6.40814	5.96098	6.59383	6.83954	6.42029	5.73547	6.45366	1.12522	0.170206	0.106793	0.0574502
sp|P62736|ACTA_HUMAN	ACTA2	ACTA_HUMAN Actin, aortic smooth muscle	156	5.58418	5.74144	5.86654	6.37328	6.50453	6.33576	6.84131	6.83407	5.89136	6.62892	1.12519	0.170173	0.0579523	0.0378252
sp|O60749|SNX2_HUMAN	SNX2	SNX2_HUMAN Sorting nexin-2	20	5.574	5.53771	5.96261	6.36726	6.28893	6.26135	6.90981	6.91568	5.8604	6.59394	1.12517	0.170143	0.0663445	0.0558545
sp|Q86XP3|DDX42_HUMAN	DDX42	DDX42_HUMAN ATP-dependent RNA helicase DDX42	34	5.62222	5.56891	6.15375	6.22223	6.22219	6.34801	6.9939	6.95231	5.89178	6.6291	1.12514	0.170111	0.0583638	0.0604738
sp|P30043|BLVRB_HUMAN	BLVRB	BLVRB_HUMAN Flavin reductase (NADPH)	17	5.43549	5.68731	5.85195	6.48938	6.45146	6.71982	6.50755	6.72169	5.86603	6.60013	1.12514	0.170109	0.0766224	0.0213871
sp|Q8NBJ5|GT251_HUMAN	COLGALT1	GT251_HUMAN Procollagen galactosyltransferase 1	33	5.45007	5.59029	6.14712	6.44592	6.26603	6.28857	7.03372	6.99941	5.90835	6.64693	1.12501	0.169933	0.0792162	0.0642618
sp|Q8TEW0-8|PARD3_HUMAN	PARD3	PARD3_HUMAN Isoform 8 of Partitioning defective 3 homolog	2	5.45667	5.656	6.01382	6.01808	6.67847	6.34275	6.7972	6.2158	5.78614	6.50855	1.12485	0.169735	0.0479701	0.042113
sp|Q8IWZ6|BBS7_HUMAN	BBS7	BBS7_HUMAN Bardet-Biedl syndrome 7 protein	1	5.44725	5.32122	6.61228	6.41347	6.77848	7.44543	5.23553	7.29477	5.94855	6.68855	1.1244	0.169155	0.110727	0.15099
sp|Q9BYX7|ACTBM_HUMAN	POTEKP	ACTBM_HUMAN Putative beta-actin-like protein 3	7	5.41895	5.28441	6.22125	6.11006	6.38256	5.62945	6.85295	7.03102	5.75867	6.474	1.12422	0.168921	0.0825399	0.0966893
sp|Q8WV74|NUDT8_HUMAN	NUDT8	NUDT8_HUMAN Nucleoside diphosphate-linked moiety X motif 8, mitochondrial	1	5.76207	6.04108	6.51389	6.82803	7.07137	5.95167	7.18273	8.05767	6.28627	7.06586	1.12402	0.168662	0.0757479	0.122259
sp|Q96L92|SNX27_HUMAN	SNX27	SNX27_HUMAN Sorting nexin-27	15	5.27126	5.5076	6.01766	6.27094	6.18987	6.08933	6.67736	6.97103	5.76687	6.4819	1.12399	0.168629	0.0794533	0.064035
sp|Q8N2Z9-2|CENPS_HUMAN	APITD1	CENPS_HUMAN Isoform 2 of Centromere protein S	2	6.26221	6.31452	5.68513	6.12633	6.01222	7.31447	7.07252	7.00798	6.09705	6.8518	1.12379	0.168372	0.046881	0.0839277
sp|Q96DT6|ATG4C_HUMAN	ATG4C	ATG4C_HUMAN Cysteine protease ATG4C	5	6.235	6.05083	5.75743	6.24228	6.37357	7.02594	6.94875	6.94336	6.07139	6.82291	1.12378	0.16836	0.0374342	0.0442513
sp|Q9NX61|T161A_HUMAN	TMEM161A	T161A_HUMAN Transmembrane protein 161A	2	5.27305	5.61704	5.96665	5.49231	6.73439	5.79847	6.02039	6.55602	5.58726	6.27732	1.12351	0.168007	0.0519312	0.0701598
sp|Q9C040-2|TRIM2_HUMAN	TRIM2	TRIM2_HUMAN Isoform 2 of Tripartite motif-containing protein 2	6	5.16294	5.34341	6.35422	6.48926	6.11743	7.24066	5.63479	7.23646	5.83746	6.55734	1.12332	0.167769	0.116646	0.123665
sp|Q8NDZ6|T161B_HUMAN	TMEM161B	T161B_HUMAN Transmembrane protein 161B	2	5.68395	5.75126	5.57707	6.59525	6.5957	7.02453	6.64386	6.248	5.90188	6.62802	1.12304	0.167403	0.0792588	0.0479432
sp|Q9H0U4|RAB1B_HUMAN	RAB1B	RAB1B_HUMAN Ras-related protein Rab-1B	11	5.98579	5.98456	5.8138	5.9649	6.43339	7.12504	6.42895	6.68349	5.93726	6.66772	1.12303	0.167395	0.0139564	0.0490824
sp|Q9H078-2|CLPB_HUMAN	CLPB	CLPB_HUMAN Isoform 2 of Caseinolytic peptidase B protein homolog	21	5.43625	5.60679	5.92606	6.25063	5.80291	6.51684	7.21555	6.54081	5.80493	6.51903	1.12302	0.167377	0.0619927	0.0884951
sp|P53370|NUDT6_HUMAN	NUDT6	NUDT6_HUMAN Nucleoside diphosphate-linked moiety X motif 6	1	5.3461	4.89315	6.60033	6.40819	6.79863	5.67063	7.29568	6.33978	5.81194	6.52618	1.12289	0.167218	0.141823	0.105904
sp|Q6DCA0|AMERL_HUMAN	AMMECR1L	AMERL_HUMAN AMMECR1-like protein	1	6.66002	6.55929	6.16351	5.81697	6.42723	7.22879	6.69594	7.94062	6.29995	7.07314	1.12273	0.167012	0.0613939	0.0943555
sp|P50995|ANX11_HUMAN	ANXA11	ANX11_HUMAN Annexin A11	26	5.53699	5.59909	5.97494	6.20602	6.07704	6.20321	7.07781	6.81898	5.82926	6.54426	1.12266	0.166917	0.0543902	0.0735352
sp|Q14344|GNA13_HUMAN	GNA13	GNA13_HUMAN Guanine nucleotide-binding protein subunit alpha-13	12	5.86174	5.74326	6.34658	6.42608	6.36178	6.33892	7.25869	7.40349	6.09441	6.84072	1.12246	0.16666	0.0561285	0.0832346
sp|O75379|VAMP4_HUMAN	VAMP4	VAMP4_HUMAN Vesicle-associated membrane protein 4	1	6.59537	5.63676	6.51288	5.27775	6.80463	6.83567	6.21424	7.09488	6.00569	6.73735	1.12183	0.165852	0.108379	0.0552487
sp|Q9Y6X9|MORC2_HUMAN	MORC2	MORC2_HUMAN MORC family CW-type zinc finger protein 2	11	5.66496	5.57383	6.04438	6.37652	6.82945	6.50898	6.57442	6.62421	5.91492	6.63426	1.12161	0.165577	0.0623979	0.0208636
sp|Q16644|MAPK3_HUMAN	MAPKAPK3	MAPK3_HUMAN MAP kinase-activated protein kinase 3	6	5.34938	5.45808	6.24252	6.46782	6.00346	5.76221	7.15888	7.45214	5.87945	6.59417	1.12156	0.16551	0.0950304	0.126761
sp|P13674|P4HA1_HUMAN	P4HA1	P4HA1_HUMAN Prolyl 4-hydroxylase subunit alpha-1	15	5.56618	5.76755	5.91897	6.64589	6.20463	6.12504	6.99063	7.48262	5.97465	6.70073	1.12153	0.165465	0.0787074	0.0972118
sp|Q8TAA9|VANG1_HUMAN	VANGL1	VANG1_HUMAN Vang-like protein 1	10	5.50735	5.54264	6.11295	6.20594	6.2766	6.56735	6.71988	6.63621	5.84222	6.55001	1.12115	0.16498	0.0630828	0.0294119
sp|Q01628|IFM3_HUMAN	IFITM3	IFM3_HUMAN Interferon-induced transmembrane protein 3	1	5.10842	5.37474	5.87642	7.06484	6.41659	6.82724	5.74728	7.26681	5.85611	6.56448	1.12096	0.164739	0.147956	0.0984104
sp|Q96EK9|KTI12_HUMAN	KTI12	KTI12_HUMAN Protein KTI12 homolog	5	5.8614	6.08163	5.97187	5.81147	6.78849	6.68129	6.39234	6.7309	5.93159	6.64826	1.12082	0.164556	0.0202984	0.0264947
sp|Q05084|ICA69_HUMAN	ICA1	ICA69_HUMAN Islet cell autoantigen 1	2	6.46498	5.81449	6.02433	5.9684	6.19812	5.57923	6.96341	8.46266	6.06805	6.80086	1.12076	0.164483	0.0459947	0.182939
sp|P14550|AK1A1_HUMAN	AKR1A1	AK1A1_HUMAN Alcohol dehydrogenase [NADP(+)]	41	5.56134	5.54067	6.09492	6.3755	6.25409	6.24618	6.97699	6.93358	5.89311	6.60271	1.12041	0.16403	0.0698078	0.0617196
sp|Q99666|RGPD5_HUMAN	RGPD5	RGPD5_HUMAN RANBP2-like and GRIP domain-containing protein 5/6	3	6.33656	4.95169	6.69312	6.65788	6.93684	6.73032	7.41385	6.52432	6.15981	6.90133	1.12038	0.163989	0.133322	0.0551963
sp|A8MXV4|NUD19_HUMAN	NUDT19	NUD19_HUMAN Nucleoside diphosphate-linked moiety X motif 19, mitochondrial	13	5.60526	5.60789	5.75059	6.28431	6.51419	6.3246	6.56552	6.63581	5.81201	6.51003	1.1201	0.163626	0.0554201	0.0204751
sp|Q96EL2|RT24_HUMAN	MRPS24	RT24_HUMAN 28S ribosomal protein S24, mitochondrial	3	5.41575	5.498	6.41191	6.58872	6.4721	6.11256	6.9858	7.21197	5.9786	6.69561	1.11993	0.163408	0.101641	0.0742135
sp|Q13469|NFAC2_HUMAN	NFATC2	NFAC2_HUMAN Nuclear factor of activated T-cells, cytoplasmic 2	1	5.00851	7.04904	6.7284	5.84019	5.70503	6.71435	5.0571	10.1012	6.15653	6.89442	1.11985	0.163311	0.149506	0.325477
sp|O75191|XYLB_HUMAN	XYLB	XYLB_HUMAN Xylulose kinase	6	5.96589	5.18438	5.88643	6.37755	6.12303	6.17918	6.87985	7.03296	5.85356	6.55375	1.11962	0.163007	0.0846209	0.0716662
sp|P27449|VATL_HUMAN	ATP6V0C	VATL_HUMAN V-type proton ATPase 16 kDa proteolipid subunit	1	5.25908	5.66299	5.52776	6.59381	5.68557	7.22977	6.72841	6.15327	5.76091	6.44925	1.11949	0.162836	0.100694	0.104321
sp|Q9BYG5|PAR6B_HUMAN	PARD6B	PAR6B_HUMAN Partitioning defective 6 homolog beta	8	5.83434	5.81514	5.97894	6.12034	6.15417	6.71935	6.84958	6.85747	5.93719	6.64514	1.11924	0.16252	0.0239702	0.0501699
sp|Q96Q83|ALKB3_HUMAN	ALKBH3	ALKB3_HUMAN Alpha-ketoglutarate-dependent dioxygenase alkB homolog 3	3	5.52143	6.22675	5.69059	6.05385	6.5795	7.2537	6.19329	6.26634	5.87315	6.57321	1.1192	0.162462	0.0551481	0.0735718
sp|P09525|ANXA4_HUMAN	ANXA4	ANXA4_HUMAN Annexin A4	32	5.6121	5.50826	6.19354	6.34944	6.1775	6.04999	6.9261	7.32835	5.91584	6.62049	1.11911	0.162355	0.0706129	0.092133
sp|Q99717|SMAD5_HUMAN	SMAD5	SMAD5_HUMAN Mothers against decapentaplegic homolog 5	4	6.12397	5.27956	5.75285	6.51384	6.68478	6.04317	6.93534	6.82553	5.91756	6.62221	1.11908	0.16231	0.0890111	0.0603142
sp|Q5T0F9|C2D1B_HUMAN	CC2D1B	C2D1B_HUMAN Coiled-coil and C2 domain-containing protein 1B	14	5.68902	5.68409	6.3544	6.22549	6.47347	6.27285	7.18035	6.87775	5.98825	6.70111	1.11904	0.162265	0.0588362	0.0606844
sp|Q8NCN5|PDPR_HUMAN	PDPR	PDPR_HUMAN Pyruvate dehydrogenase phosphatase regulatory subunit, mitochondrial	27	5.56897	5.73606	5.9208	6.34108	6.2069	6.38737	6.83203	6.93911	5.89173	6.59135	1.11875	0.161884	0.0563924	0.0531557
sp|P54886-2|P5CS_HUMAN	ALDH18A1	P5CS_HUMAN Isoform Short of Delta-1-pyrroline-5-carboxylate synthase	2	5.28094	5.43671	6.00703	6.66573	6.16553	5.86197	7.17412	6.95891	5.8476	6.54013	1.11843	0.161475	0.107464	0.0957948
sp|P17568|NDUB7_HUMAN	NDUFB7	NDUB7_HUMAN NADH dehydrogenase [ubiquinone] 1 beta subcomplex subunit 7	7	5.94595	5.45171	6.00353	6.1001	6.1989	6.0488	7.19393	6.83728	5.87532	6.56973	1.11819	0.161165	0.0492707	0.0819737
sp|Q8TET4|GANC_HUMAN	GANC	GANC_HUMAN Neutral alpha-glucosidase C	2	5.97494	4.62964	6.92838	6.10489	6.60196	6.55491	7.04998	6.21997	5.90946	6.6067	1.11799	0.160904	0.161089	0.0516082
sp|Q9Y576|ASB1_HUMAN	ASB1	ASB1_HUMAN Ankyrin repeat and SOCS box protein 1	1	5.96494	6.11967	6.15069	5.59485	6.05697	6.32239	6.31967	7.9412	5.95754	6.66006	1.11792	0.160819	0.0428157	0.129596
sp|O00479|HMGN4_HUMAN	HMGN4	HMGN4_HUMAN High mobility group nucleosome-binding domain-containing protein 4	1	6.43978	6.16344	4.69136	5.41334	6.10683	7.40715	6.5813	5.28712	5.67698	6.3456	1.11778	0.160633	0.138681	0.139768
sp|Q14691|PSF1_HUMAN	GINS1	PSF1_HUMAN DNA replication complex GINS protein PSF1	4	5.81535	5.44542	6.19509	6.20077	6.5797	6.01934	6.83507	7.00747	5.91416	6.61039	1.11772	0.160564	0.0610075	0.0652677
sp|P24539|AT5F1_HUMAN	ATP5F1	AT5F1_HUMAN ATP synthase F(0) complex subunit B1, mitochondrial	15	5.4573	5.52747	6.4792	6.32537	6.32791	6.23058	7.03553	6.99572	5.94733	6.64743	1.11772	0.160554	0.0890897	0.0642821
sp|Q01196-8|RUNX1_HUMAN	RUNX1	RUNX1_HUMAN Isoform AML-1G of Runt-related transcription factor 1	1	6.6106	5.05085	7.01493	7.34064	4.73866	7.77507	8.11946	8.44099	6.50425	7.26854	1.11751	0.160283	0.155884	0.235036
sp|Q92930|RAB8B_HUMAN	RAB8B	RAB8B_HUMAN Ras-related protein Rab-8B	2	6.14567	6.38927	5.25557	5.46611	6.04269	7.28254	6.51877	6.14438	5.81415	6.49709	1.11746	0.160225	0.0928243	0.0865346
sp|O95149|SPN1_HUMAN	SNUPN	SPN1_HUMAN Snurportin-1	3	5.49364	5.73027	5.89166	6.6266	5.93407	6.05679	6.91345	7.62394	5.93554	6.63206	1.11735	0.160078	0.0823585	0.119399
sp|O96011|PX11B_HUMAN	PEX11B	PX11B_HUMAN Peroxisomal membrane protein 11B	4	5.28112	5.56042	6.23509	5.86585	5.92364	6.47365	7.39711	5.83506	5.73562	6.40737	1.11712	0.159782	0.0714403	0.11202
sp|Q99942|RNF5_HUMAN	RNF5	RNF5_HUMAN E3 ubiquitin-protein ligase RNF5	1	5.67725	5.89372	6.2697	5.64694	6.02599	6.60355	6.43384	7.1735	5.8719	6.55922	1.11705	0.159696	0.0488877	0.0725499
sp|O75971|SNPC5_HUMAN	SNAPC5	SNPC5_HUMAN snRNA-activating protein complex subunit 5	1	6.527	5.82801	6.16521	5.14575	6.13575	7.60442	6.51118	6.18448	5.91649	6.60896	1.11704	0.159681	0.0993459	0.103534
sp|Q8NCE0|SEN2_HUMAN	TSEN2	SEN2_HUMAN tRNA-splicing endonuclease subunit Sen2	9	5.40788	5.4059	6.15149	6.34158	6.02656	6.08014	6.78643	7.13911	5.82671	6.50806	1.11694	0.159545	0.0842572	0.0837234
sp|Q96AE4|FUBP1_HUMAN	FUBP1	FUBP1_HUMAN Far upstream element-binding protein 1	5	5.55766	6.07359	5.97049	5.63324	6.22774	7.51546	6.04561	6.16001	5.80875	6.4872	1.1168	0.159371	0.0433416	0.106303
sp|Q9Y535|RPC8_HUMAN	POLR3H	RPC8_HUMAN DNA-directed RNA polymerase III subunit RPC8	6	5.3775	5.50612	6.46397	6.30213	6.37247	6.37166	6.64824	7.01887	5.91243	6.60281	1.11677	0.159329	0.0930141	0.0464056
sp|O94829|IPO13_HUMAN	IPO13	IPO13_HUMAN Importin-13	1	5.13703	4.99054	6.86166	7.01672	5.69839	5.17338	7.41182	8.52531	6.00149	6.70223	1.11676	0.15932	0.180999	0.2307
sp|Q9H4M3-2|FBX44_HUMAN	FBXO44	FBX44_HUMAN Isoform 2 of F-box only protein 44	1	5.7745	6.73441	6.36773	6.89811	8.05542	5.70088	7.82101	7.20377	6.44369	7.19527	1.11664	0.159162	0.0773155	0.147185
sp|P0CG13|CTF8_HUMAN	CHTF8	CTF8_HUMAN Chromosome transmission fidelity protein 8 homolog	4	5.28917	6.0339	6.08451	6.25489	6.45844	6.85643	6.75832	6.3492	5.91562	6.6056	1.11664	0.15916	0.0723841	0.0364206
sp|A3KN83|SBNO1_HUMAN	SBNO1	SBNO1_HUMAN Protein strawberry notch homolog 1	29	5.56336	5.69257	6.12193	6.47326	6.20216	6.46777	6.95473	6.99858	5.96278	6.65581	1.11623	0.158629	0.0697191	0.0580602
sp|Q16891-2|IMMT_HUMAN	IMMT	IMMT_HUMAN Isoform 2 of Mitochondrial inner membrane protein	2	5.01778	5.32272	6.88688	6.75473	7.01409	6.16659	7.08363	6.503	5.99553	6.69183	1.11614	0.158514	0.160546	0.0650743
sp|P81274|GPSM2_HUMAN	GPSM2	GPSM2_HUMAN G-protein-signaling modulator 2	3	5.23194	6.02015	5.23416	6.72318	5.87874	6.55336	6.92659	6.54277	5.80236	6.47537	1.11599	0.158322	0.123623	0.0673264
sp|Q330K2|NDUF6_HUMAN	NDUFAF6	NDUF6_HUMAN NADH dehydrogenase (ubiquinone) complex I, assembly factor 6	1	5.32505	5.32335	6.00031	7.37217	7.09754	7.19571	6.65555	5.85291	6.00522	6.70043	1.11577	0.158036	0.160765	0.0913241
sp|P04083|ANXA1_HUMAN	ANXA1	ANXA1_HUMAN Annexin A1	84	5.75851	5.55283	6.02843	6.38697	6.14572	5.98189	6.94072	7.40392	5.93168	6.61806	1.11571	0.157967	0.0607974	0.101343
sp|Q8WUJ0|STYX_HUMAN	STYX	STYX_HUMAN Serine/threonine/tyrosine-interacting protein	1	6.59723	5.29324	6.30998	6.7191	7.78325	6.32465	7.26903	6.42149	6.22989	6.94961	1.11553	0.157725	0.103944	0.100604
sp|P16885|PLCG2_HUMAN	PLCG2	PLCG2_HUMAN 1-phosphatidylinositol 4,5-bisphosphate phosphodiesterase gamma-2	26	5.5696	5.57463	6.07673	6.52642	6.16273	6.2214	7.02256	7.07829	5.93684	6.62124	1.11528	0.157406	0.0773867	0.0750122
sp|Q9H2K2|TNKS2_HUMAN	TNKS2	TNKS2_HUMAN Tankyrase-2	2	5.86381	6.44134	5.96484	5.27018	6.65844	6.06278	6.62334	6.90712	5.88504	6.56292	1.11519	0.157285	0.0817478	0.0543283
sp|Q14644|RASA3_HUMAN	RASA3	RASA3_HUMAN Ras GTPase-activating protein 3	5	5.87947	5.41716	6.08418	6.42394	6.39061	6.35128	7.0731	6.73143	5.95119	6.63661	1.11517	0.157268	0.0707281	0.0508338
sp|Q9H1Y0|ATG5_HUMAN	ATG5	ATG5_HUMAN Autophagy protein 5	10	5.65066	5.78065	6.16324	6.19709	6.4295	6.45848	6.78171	6.85876	5.94791	6.63211	1.11503	0.157086	0.0460219	0.0331432
sp|O75153|CLU_HUMAN	CLUH	CLU_HUMAN Clustered mitochondria protein homolog	58	5.645	5.84353	6.11509	6.54028	6.50243	6.63238	6.91307	6.8724	6.03597	6.73007	1.11499	0.157035	0.0641992	0.0291056
sp|Q9BSY9|DESI2_HUMAN	DESI2	DESI2_HUMAN Desumoylating isopeptidase 2	1	5.38301	5.96045	4.87866	5.80735	5.14139	5.47716	7.10629	6.83779	5.50737	6.14066	1.11499	0.15703	0.0880848	0.158926
sp|P82914|RT15_HUMAN	MRPS15	RT15_HUMAN 28S ribosomal protein S15, mitochondrial	12	5.66016	5.62554	6.08231	6.41987	6.02095	6.53005	7.2921	6.67891	5.94697	6.6305	1.11494	0.156963	0.0634784	0.0789313
sp|Q9Y3D3|RT16_HUMAN	MRPS16	RT16_HUMAN 28S ribosomal protein S16, mitochondrial	6	5.54243	5.53679	6.10972	6.46604	6.24952	6.02717	7.09642	7.00015	5.91374	6.59332	1.11491	0.156932	0.0770836	0.0810799
sp|Q8N8E3|CE112_HUMAN	CEP112	CE112_HUMAN Centrosomal protein of 112 kDa	2	5.75511	5.72875	6.6402	6.43071	7.41142	6.59688	5.7387	7.62862	6.13869	6.8439	1.11488	0.156888	0.0759413	0.125703
sp|P31327-3|CPSM_HUMAN	CPS1	CPSM_HUMAN Isoform 3 of Carbamoyl-phosphate synthase [ammonia], mitochondrial	56	5.15707	5.70604	5.89771	6.09196	6.50789	6.28899	6.11148	6.56775	5.71319	6.36903	1.11479	0.156775	0.0705101	0.0328735
sp|P49189|AL9A1_HUMAN	ALDH9A1	AL9A1_HUMAN 4-trimethylaminobutyraldehyde dehydrogenase	30	5.37032	5.7398	6.0596	6.38369	6.12951	6.41546	6.88309	6.82389	5.88835	6.56299	1.11457	0.156489	0.0737076	0.0542432
sp|O00258|WRB_HUMAN	WRB	WRB_HUMAN Tail-anchored protein insertion receptor WRB	3	5.76558	6.15399	6.1335	6.03731	6.4542	6.57577	6.96117	6.8583	6.02259	6.71236	1.11453	0.156435	0.0296773	0.0353081
sp|Q9BPU6|DPYL5_HUMAN	DPYSL5	DPYL5_HUMAN Dihydropyrimidinase-related protein 5	10	5.76675	6.02053	5.89858	6.26042	6.38571	6.59488	6.98482	6.719	5.98657	6.6711	1.11434	0.156196	0.0350666	0.0375222
sp|P82675|RT05_HUMAN	MRPS5	RT05_HUMAN 28S ribosomal protein S5, mitochondrial	16	5.77035	5.65373	6.03895	6.22086	6.33656	6.09241	7.13545	6.82703	5.92097	6.59786	1.11432	0.156165	0.0433842	0.0713737
sp|Q8NBJ7|SUMF2_HUMAN	SUMF2	SUMF2_HUMAN Sulfatase-modifying factor 2	10	5.62095	5.52238	6.08461	6.65082	6.30762	6.09418	7.01159	7.18659	5.96969	6.64999	1.11396	0.155697	0.0864411	0.0798003
sp|P51790-2|CLCN3_HUMAN	CLCN3	CLCN3_HUMAN Isoform 2 of H(+)/Cl(-) exchange transporter 3	7	5.80522	6.02177	6.10061	5.92008	6.5379	6.66098	6.57275	6.79358	5.96192	6.6413	1.11395	0.155689	0.0214631	0.0171607
sp|Q96I99|SUCB2_HUMAN	SUCLG2	SUCB2_HUMAN Succinyl-CoA ligase [GDP-forming] subunit beta, mitochondrial	36	5.57052	5.8086	5.99504	6.36055	6.29991	6.32727	6.94521	6.86627	5.93368	6.60966	1.11392	0.155651	0.0561917	0.0519807
sp|Q14168|MPP2_HUMAN	MPP2	MPP2_HUMAN MAGUK p55 subfamily member 2	3	5.68485	5.48344	6.05234	6.39814	6.34791	6.82857	6.14347	6.98745	5.90469	6.57685	1.11383	0.155535	0.0685198	0.0603224
sp|Q8N0Z6|TTC5_HUMAN	TTC5	TTC5_HUMAN Tetratricopeptide repeat protein 5	19	5.55092	5.98113	6.13148	6.25507	6.36071	6.62032	6.95091	6.70927	5.97965	6.6603	1.11383	0.155527	0.0513384	0.0365936
sp|Q92636-2|FAN_HUMAN	NSMAF	FAN_HUMAN Isoform 2 of Protein FAN	10	5.90002	5.67768	6.21309	6.10159	6.52623	6.37529	6.84001	6.86626	5.9731	6.65195	1.11365	0.155298	0.0394668	0.0361674
sp|Q16533|SNPC1_HUMAN	SNAPC1	SNPC1_HUMAN snRNA-activating protein complex subunit 1	5	6.00447	5.73754	5.98885	6.3632	6.31661	6.54717	6.87285	7.09459	6.02351	6.7078	1.1136	0.155235	0.0427291	0.051332
sp|O00116|ADAS_HUMAN	AGPS	ADAS_HUMAN Alkyldihydroxyacetonephosphate synthase, peroxisomal	27	5.65862	5.46847	6.19625	6.42033	6.27545	6.10939	7.16852	6.884	5.93592	6.60934	1.11345	0.155035	0.0752039	0.075628
sp|P27797|CALR_HUMAN	CALR	CALR_HUMAN Calreticulin	81	5.66941	5.66062	5.97601	6.35589	6.26403	6.25811	6.92539	6.89558	5.91548	6.58578	1.11331	0.154858	0.0554801	0.0569629
sp|Q15006|EMC2_HUMAN	EMC2	EMC2_HUMAN ER membrane protein complex subunit 2	8	5.8461	5.72715	6.12911	6.18334	6.03042	6.67051	7.09595	6.7933	5.97142	6.64755	1.11323	0.154746	0.0368357	0.0674811
sp|Q6ZVK8|NUD18_HUMAN	NUDT18	NUD18_HUMAN 8-oxo-dGDP phosphatase NUDT18	3	5.84953	5.7458	6.19767	6.45553	6.62614	6.38847	6.21249	7.76328	6.06213	6.7476	1.11307	0.154548	0.0537402	0.103447
sp|Q96KG9|NTKL_HUMAN	SCYL1	NTKL_HUMAN N-terminal kinase-like protein	28	5.5162	5.73246	6.06508	6.38781	6.27355	6.40701	6.76519	6.9347	5.92539	6.59511	1.11303	0.154488	0.0644854	0.046573
sp|P27695|APEX1_HUMAN	APEX1	APEX1_HUMAN DNA-(apurinic or apyrimidinic site) lyase	20	5.55791	5.79697	5.89643	6.19371	5.93837	6.37178	6.75822	7.02592	5.86125	6.52357	1.113	0.154453	0.044915	0.0725996
sp|Q9UNH7|SNX6_HUMAN	SNX6	SNX6_HUMAN Sorting nexin-6	24	5.82076	5.59216	6.12129	6.29367	6.39657	6.02462	7.0427	7.05573	5.95697	6.6299	1.11297	0.15441	0.0523734	0.0765408
sp|P78371|TCPB_HUMAN	CCT2	TCPB_HUMAN T-complex protein 1 subunit beta	101	5.61565	5.61999	6.13709	6.23412	6.17924	6.27053	6.96929	6.85386	5.90171	6.56823	1.11294	0.154371	0.0559499	0.0610495
tr|F5H2E7|F5H2E7_HUMAN	LTBR	F5H2E7_HUMAN Tumor necrosis factor receptor superfamily member 3	1	5.71297	6.91161	5.97162	5.92013	7.11595	7.33651	7.5525	5.27624	6.12908	6.8203	1.11278	0.154164	0.0870485	0.153173
sp|P26572|MGAT1_HUMAN	MGAT1	MGAT1_HUMAN Alpha-1,3-mannosyl-glycoprotein 2-beta-N-acetylglucosaminyltransferase	8	5.7231	5.83076	6.08773	6.35453	6.39655	6.6799	6.60147	7.02346	5.99903	6.67535	1.11274	0.154113	0.0470202	0.0391016
sp|Q8NFV4|ABHDB_HUMAN	ABHD11	ABHDB_HUMAN Alpha/beta hydrolase domain-containing protein 11	9	5.64564	5.75091	5.89049	6.29245	6.7509	6.75425	6.42457	6.29784	5.89487	6.55689	1.1123	0.153551	0.0480739	0.0353535
sp|Q8NBF2|NHLC2_HUMAN	NHLRC2	NHLC2_HUMAN NHL repeat-containing protein 2	22	5.91628	5.86912	6.19391	6.32047	6.47544	6.38841	6.97245	7.19108	6.07494	6.75685	1.11225	0.153478	0.0358097	0.057318
sp|Q9NYK5|RM39_HUMAN	MRPL39	RM39_HUMAN 39S ribosomal protein L39, mitochondrial	19	5.75367	5.79825	5.92013	6.23609	6.3474	6.23968	6.80435	6.97546	5.92704	6.59172	1.11215	0.153345	0.0367331	0.053714
sp|Q96ER9|CCD51_HUMAN	CCDC51	CCD51_HUMAN Coiled-coil domain-containing protein 51	13	5.59559	5.49843	5.8812	6.30475	6.18651	6.36973	6.423	6.91116	5.81999	6.4726	1.11213	0.153328	0.062149	0.0478048
sp|Q9BUF5|TBB6_HUMAN	TUBB6	TBB6_HUMAN Tubulin beta-6 chain	34	5.29659	5.60201	6.12314	6.22983	6.16082	6.3417	6.67553	6.68046	5.81289	6.46463	1.11212	0.153311	0.0757153	0.0397876
sp|Q9Y248|PSF2_HUMAN	GINS2	PSF2_HUMAN DNA replication complex GINS protein PSF2	7	5.4264	5.84522	6.17443	6.4756	6.05639	6.20899	7.05524	7.28305	5.98041	6.65092	1.11212	0.153308	0.0752803	0.0915329
sp|P51817|PRKX_HUMAN	PRKX	PRKX_HUMAN cAMP-dependent protein kinase catalytic subunit PRKX	1	5.80001	5.65662	6.03093	6.15627	6.41288	6.46985	7.16024	6.25154	5.91096	6.57363	1.11211	0.153298	0.0380265	0.0611315
sp|Q12965|MYO1E_HUMAN	MYO1E	MYO1E_HUMAN Unconventional myosin-Ie	34	5.55288	5.62832	6.07303	6.42707	6.31249	6.4544	6.77076	6.79783	5.92033	6.58387	1.11208	0.153259	0.0689841	0.0362747
sp|Q96FN9|DTD2_HUMAN	DTD2	DTD2_HUMAN Probable D-tyrosyl-tRNA(Tyr) deacylase 2	2	5.63661	5.35545	6.00198	6.18331	5.86818	6.71333	6.42477	6.75857	5.79434	6.44121	1.11164	0.152689	0.0639498	0.0635958
sp|Q8IZQ5|SELH_HUMAN	SELH	SELH_HUMAN Selenoprotein H	4	5.76014	5.77376	6.16614	6.12957	6.55385	6.77146	7.00298	6.16055	5.9574	6.62221	1.11159	0.152629	0.0370114	0.0541007
sp|P82930|RT34_HUMAN	MRPS34	RT34_HUMAN 28S ribosomal protein S34, mitochondrial	14	5.60979	5.83509	6.14816	6.35261	6.34722	6.32385	6.84369	7.09939	5.98641	6.65354	1.11144	0.15243	0.0549817	0.057393
sp|Q12860|CNTN1_HUMAN	CNTN1	CNTN1_HUMAN Contactin-1	1	6.31521	5.77311	5.59791	6.20938	6.48188	6.59081	6.67357	6.81195	5.9739	6.63955	1.11143	0.152412	0.0574718	0.0209625
sp|Q96D46|NMD3_HUMAN	NMD3	NMD3_HUMAN 60S ribosomal export protein NMD3	22	5.77563	5.95993	5.86572	5.76492	6.0957	6.90609	6.99477	5.9706	5.84155	6.49179	1.11131	0.152265	0.0155695	0.0821467
sp|Q96BQ5|CC127_HUMAN	CCDC127	CC127_HUMAN Coiled-coil domain-containing protein 127	1	5.77361	6.12402	5.99557	6.02299	6.21037	6.86429	6.25534	7.24393	5.97905	6.64348	1.11113	0.152024	0.0246991	0.0751379
sp|Q8IZ81|ELMD2_HUMAN	ELMOD2	ELMD2_HUMAN ELMO domain-containing protein 2	12	5.47126	5.40342	6.55147	6.38717	6.12031	6.1873	6.99127	7.159	5.95333	6.61447	1.11105	0.151929	0.10082	0.0811881
sp|Q15126|PMVK_HUMAN	PMVK	PMVK_HUMAN Phosphomevalonate kinase	11	5.53097	5.35126	6.34332	6.68553	6.02071	5.84066	7.24434	7.46016	5.97777	6.64147	1.11103	0.151895	0.106972	0.12478
sp|P62070|RRAS2_HUMAN	RRAS2	RRAS2_HUMAN Ras-related protein R-Ras2	7	5.82967	5.67508	5.75911	5.89312	6.07485	6.75924	6.8888	6.00049	5.78925	6.43084	1.11083	0.151633	0.0161934	0.0712312
sp|O75955|FLOT1_HUMAN	FLOT1	FLOT1_HUMAN Flotillin-1	6	5.69448	5.63335	5.93937	6.65046	6.2679	6.56296	7.24459	6.49051	5.97942	6.64149	1.11073	0.151503	0.0780169	0.0634215
sp|Q8TAX7|MUC7_HUMAN	MUC7	MUC7_HUMAN Mucin-7	1	2.47485	2.70351	1.58493	1.93396	2.37248	0	1.82933	5.45728	2.17431	2.41477	1.11059	0.151328	0.233836	0.93925
sp|Q8N302|AGGF1_HUMAN	AGGF1	AGGF1_HUMAN Angiogenic factor with G patch and FHA domains 1	2	6.13254	6.52627	5.43209	6.15508	5.92893	7.25208	7.15345	6.58076	6.06149	6.7288	1.11009	0.150677	0.0753593	0.0906371
sp|Q9P0S9|TM14C_HUMAN	TMEM14C	TM14C_HUMAN Transmembrane protein 14C	1	5.35253	5.54861	6.36678	6.34727	6.13175	6.22559	7.245	6.60582	5.9038	6.55204	1.1098	0.150301	0.0896861	0.0771369
sp|Q10713|MPPA_HUMAN	PMPCA	MPPA_HUMAN Mitochondrial-processing peptidase subunit alpha	36	5.51421	5.47832	6.12372	6.54663	6.09694	6.20352	6.80272	7.15328	5.91572	6.56412	1.10961	0.150047	0.0869558	0.0762899
sp|Q6PJ61|FBX46_HUMAN	FBXO46	FBX46_HUMAN F-box only protein 46	1	4.61562	6.70807	6.35918	6.7818	5.93357	6.75231	7.58326	6.873	6.11617	6.78554	1.10944	0.149835	0.166314	0.099625
sp|Q9NQU5|PAK6_HUMAN	PAK6	PAK6_HUMAN Serine/threonine-protein kinase PAK 6	1	6.02408	5.3988	6.57022	6.37186	8.21797	5.76107	6.51588	6.53383	6.09124	6.75719	1.10933	0.149687	0.0843603	0.15366
sp|Q14166|TTL12_HUMAN	TTLL12	TTL12_HUMAN Tubulin--tyrosine ligase-like protein 12	30	5.43115	5.26045	5.98033	6.46837	5.97003	5.80139	6.90862	6.9892	5.78507	6.41731	1.10929	0.149633	0.094968	0.0963898
sp|P07099|HYEP_HUMAN	EPHX1	HYEP_HUMAN Epoxide hydrolase 1	20	5.39187	5.8949	6.08831	6.34484	6.04783	6.35781	6.99109	6.91344	5.92998	6.57754	1.1092	0.149521	0.0680116	0.0687083
sp|P41250|SYG_HUMAN	GARS	SYG_HUMAN Glycine--tRNA ligase	68	5.7954	5.81193	5.92627	6.23032	6.40591	6.32493	6.70025	6.91849	5.94098	6.5874	1.10881	0.149007	0.0339134	0.0414982
sp|P61224|RAP1B_HUMAN	RAP1B	RAP1B_HUMAN Ras-related protein Rap-1b	11	5.98625	5.78941	5.88568	6.20094	5.81367	6.19287	5.93145	8.51822	5.96557	6.61405	1.1087	0.148875	0.0295523	0.193421
sp|P51398|RT29_HUMAN	DAP3	RT29_HUMAN 28S ribosomal protein S29, mitochondrial	26	5.88685	5.82344	5.91786	6.23178	6.35726	6.57565	6.77702	6.74254	5.96498	6.61312	1.10866	0.148813	0.0305372	0.0290186
sp|P00846|ATP6_HUMAN	MT-ATP6	ATP6_HUMAN ATP synthase subunit a	2	5.12692	5.87822	5.95829	7.17128	5.58475	6.18078	6.19682	8.79136	6.03368	6.68843	1.10852	0.148629	0.140182	0.213891
sp|Q96FI4|NEIL1_HUMAN	NEIL1	NEIL1_HUMAN Endonuclease 8-like 1	2	5.14113	6.52054	6.533	6.44127	6.36435	5.83805	7.45809	7.64619	6.15899	6.82667	1.10841	0.148489	0.110373	0.12718
sp|Q8WUJ1|NEUFC_HUMAN	CYB5D2	NEUFC_HUMAN Neuferricin	1	5.18747	5.84215	5.55218	6.62092	6.17065	6.1661	6.28557	7.09305	5.80068	6.42884	1.10829	0.148337	0.104971	0.0694125
sp|Q9H7T9-2|AUNIP_HUMAN	AUNIP	AUNIP_HUMAN Isoform 2 of Aurora kinase A and ninein-interacting protein	1	5.72299	6.37548	6.43495	5.73953	7.10991	4.91094	7.39457	7.48359	6.06824	6.72475	1.10819	0.148204	0.0642564	0.18137
sp|Q9NYG2-2|ZDHC3_HUMAN	ZDHHC3	ZDHC3_HUMAN Isoform 2 of Palmitoyltransferase ZDHHC3	2	5.68135	5.55975	6.10658	6.01139	6.70708	5.83477	6.5407	6.798	5.83977	6.47014	1.10794	0.147885	0.0446702	0.0675057
sp|Q9Y399|RT02_HUMAN	MRPS2	RT02_HUMAN 28S ribosomal protein S2, mitochondrial	10	5.65881	5.70766	6.07503	6.39763	6.25275	6.44964	6.93859	6.76919	5.95978	6.60254	1.10785	0.147762	0.0580554	0.0467994
sp|Q8IWZ3-2|ANKH1_HUMAN	ANKHD1	ANKH1_HUMAN Isoform 2 of Ankyrin repeat and KH domain-containing protein 1	2	5.505	5.47946	6.84448	6.1373	6.84741	6.29597	6.711	6.69554	5.99156	6.63748	1.1078	0.147704	0.107635	0.0358088
sp|P78549|NTHL1_HUMAN	NTHL1	NTHL1_HUMAN Endonuclease III-like protein 1	1	5.51354	6.01847	6.01229	6.53107	6.6867	5.99107	7.24663	6.74574	6.01884	6.66753	1.10778	0.147667	0.0690219	0.0774224
sp|Q96MM7-4|H6ST2_HUMAN	HS6ST2	H6ST2_HUMAN Isoform 4 of Heparan-sulfate 6-O-sulfotransferase 2	5	5.97606	6.12878	6.41788	6.2473	6.77682	6.67493	7.12331	6.863	6.1925	6.85952	1.10771	0.147583	0.0301688	0.0279799
sp|Q9UP38|FZD1_HUMAN	FZD1	FZD1_HUMAN Frizzled-1	1	5.72493	6.04163	6.51941	6.68264	7.22113	6.68843	6.33422	7.41198	6.24215	6.91394	1.10762	0.147464	0.0703567	0.0713146
sp|P51157|RAB28_HUMAN	RAB28	RAB28_HUMAN Ras-related protein Rab-28	1	6.45863	4.64247	6.28948	6.67652	6.64312	6.96115	6.29723	6.75196	6.01677	6.66336	1.10746	0.147261	0.154535	0.041643
sp|O00178|GTPB1_HUMAN	GTPBP1	GTPB1_HUMAN GTP-binding protein 1	13	5.76346	5.86192	6.28071	6.29524	6.62227	6.58475	6.78563	6.80746	6.05033	6.70003	1.10738	0.147153	0.0458484	0.0168431
sp|O60563|CCNT1_HUMAN	CCNT1	CCNT1_HUMAN Cyclin-T1	5	5.83965	5.4216	6.57849	6.32826	6.4161	6.47219	6.86736	7.00443	6.042	6.69002	1.10725	0.146984	0.0852331	0.0433898
sp|P08651-5|NFIC_HUMAN	NFIC	NFIC_HUMAN Isoform 5 of Nuclear factor 1 C-type	1	5.69434	5.81845	5.53382	7.63376	5.8555	7.82762	7.63869	6.00535	6.17009	6.83179	1.10724	0.146972	0.15927	0.153028
sp|Q6ISB3|GRHL2_HUMAN	GRHL2	GRHL2_HUMAN Grainyhead-like protein 2 homolog	5	5.42354	5.15984	6.32049	6.41756	6.29695	6.51233	6.39744	6.61562	5.83036	6.45559	1.10724	0.146963	0.108482	0.0214226
sp|Q9BZJ0|CRNL1_HUMAN	CRNKL1	CRNL1_HUMAN Crooked neck-like protein 1	19	5.66251	5.65284	6.39486	6.31989	6.31217	6.46637	6.89514	6.9328	6.00753	6.65162	1.10721	0.146935	0.0674402	0.0465735
sp|Q9H0T7|RAB17_HUMAN	RAB17	RAB17_HUMAN Ras-related protein Rab-17	7	6.64313	5.94608	5.95797	5.88039	6.57777	7.25928	6.89482	6.3145	6.10689	6.76159	1.10721	0.146925	0.058805	0.0603247
sp|Q7L099-3|RUFY3_HUMAN	RUFY3	RUFY3_HUMAN Isoform 3 of Protein RUFY3	3	6.00342	6.34356	5.88186	6.12749	6.83257	6.43581	6.83265	6.86368	6.08908	6.74118	1.10709	0.146776	0.032365	0.0302773
tr|H0YHI0|H0YHI0_HUMAN	CHURC1-FNTB	H0YHI0_HUMAN Protein CHURC1-FNTB (Fragment)	9	5.79658	5.52761	5.89572	6.65467	6.32489	6.62505	6.77739	6.70155	5.96864	6.60722	1.10699	0.14664	0.0809344	0.0300019
sp|O00487|PSDE_HUMAN	PSMD14	PSDE_HUMAN 26S proteasome non-ATPase regulatory subunit 14	21	5.74552	5.83106	6.02213	6.34106	6.42235	6.29639	6.88492	6.89715	5.98494	6.6252	1.10698	0.146627	0.0441231	0.0469834
sp|Q8NCC3|PAG15_HUMAN	PLA2G15	PAG15_HUMAN Group XV phospholipase A2	1	5.9547	6.56858	5.6093	6.49966	6.90911	6.78191	6.61754	6.948	6.15806	6.81414	1.10654	0.146056	0.0742805	0.0218704
sp|Q9UHQ4-2|BAP29_HUMAN	BCAP29	BAP29_HUMAN Isoform 2 of B-cell receptor-associated protein 29	5	5.73651	5.89043	6.41284	6.44657	6.38763	6.70233	7.19032	6.81431	6.12159	6.77365	1.10652	0.146027	0.0590618	0.0489165
sp|P49590|SYHM_HUMAN	HARS2	SYHM_HUMAN Probable histidine--tRNA ligase, mitochondrial	23	5.49901	5.94229	6.02661	6.30095	6.39568	6.19048	6.80857	6.90358	5.94222	6.57458	1.10642	0.145897	0.0560041	0.051395
sp|Q03468|ERCC6_HUMAN	ERCC6	ERCC6_HUMAN DNA excision repair protein ERCC-6	2	5.6694	5.39284	7.31388	5.59474	6.03069	6.7613	7.4861	6.23725	5.99272	6.62883	1.10615	0.145546	0.148262	0.0979042
sp|Q92544|TM9S4_HUMAN	TM9SF4	TM9S4_HUMAN Transmembrane 9 superfamily member 4	12	5.10753	5.33521	6.13937	6.39297	5.70054	6.57047	6.69006	6.45114	5.74377	6.35305	1.10608	0.145452	0.107778	0.0701725
sp|Q14697-2|GANAB_HUMAN	GANAB	GANAB_HUMAN Isoform 2 of Neutral alpha-glucosidase AB	91	5.60652	5.75595	6.01749	6.53064	6.29625	6.25196	6.88022	7.01523	5.97765	6.61091	1.10594	0.145272	0.0679036	0.0594799
sp|Q9P2K3-3|RCOR3_HUMAN	RCOR3	RCOR3_HUMAN Isoform 3 of REST corepressor 3	10	5.48514	5.75605	6.24474	6.31624	6.32311	6.27627	6.7141	7.01005	5.95054	6.58088	1.10593	0.14526	0.0668496	0.0527241
sp|O00748|EST2_HUMAN	CES2	EST2_HUMAN Cocaine esterase	2	5.91828	6.37482	5.66872	6.39531	7.07755	6.50101	6.58793	6.77066	6.08928	6.73429	1.10592	0.145253	0.0585472	0.0378578
sp|P07900-2|HS90A_HUMAN	HSP90AA1	HS90A_HUMAN Isoform 2 of Heat shock protein HSP 90-alpha	305	5.81422	5.81036	6.05491	6.23489	6.2864	6.26371	6.92083	6.9754	5.9786	6.61158	1.10588	0.14519	0.034392	0.0588875
sp|Q9UHA3|RLP24_HUMAN	RSL24D1	RLP24_HUMAN Probable ribosome biogenesis protein RLP24	1	6.00374	5.66989	6.07666	6.08742	6.83017	6.55951	6.33335	6.63799	5.95943	6.59026	1.10585	0.145161	0.032985	0.0311938
sp|P52630|STAT2_HUMAN	STAT2	STAT2_HUMAN Signal transducer and activator of transcription 2	5	5.52313	5.519	6.01838	6.66545	6.79326	6.32297	6.34734	6.77171	5.93149	6.55882	1.10576	0.145042	0.0914731	0.0394289
sp|Q9Y5W9|SNX11_HUMAN	SNX11	SNX11_HUMAN Sorting nexin-11	4	5.26568	5.89271	6.39544	6.46266	6.10468	6.43808	6.88402	7.12208	6.00412	6.63722	1.10544	0.144625	0.0922874	0.0684523
tr|Q5JRS3|Q5JRS3_HUMAN	UBA1	Q5JRS3_HUMAN Ubiquitin-like modifier-activating enzyme 1 (Fragment)	1	5.58644	9.43962	5.91418	5.70909	4.81696	6.59864	7.72165	10.3171	6.66233	7.36359	1.10526	0.144381	0.278649	0.312858
sp|Q9H4G4|GAPR1_HUMAN	GLIPR2	GAPR1_HUMAN Golgi-associated plant pathogenesis-related protein 1	3	5.18611	5.57746	6.48733	6.40466	6.43998	5.7714	6.75525	7.17494	5.91389	6.53539	1.10509	0.144166	0.107501	0.09053
sp|O14782|KIF3C_HUMAN	KIF3C	KIF3C_HUMAN Kinesin-like protein KIF3C	4	5.45304	5.60851	6.48115	6.47584	6.06595	6.30685	6.55567	7.6132	6.00464	6.63542	1.10505	0.144111	0.0917357	0.102756
sp|P15559|NQO1_HUMAN	NQO1	NQO1_HUMAN NAD(P)H dehydrogenase [quinone] 1	18	5.68876	5.64593	6.09634	6.17376	6.18114	6.17579	6.73024	6.99434	5.9012	6.52038	1.10492	0.143948	0.046166	0.0627678
sp|Q9Y3A6|TMED5_HUMAN	TMED5	TMED5_HUMAN Transmembrane emp24 domain-containing protein 5	7	5.7088	5.87054	6.34392	6.22371	6.31362	6.39563	6.94767	7.02039	6.03674	6.66933	1.10479	0.143771	0.0491855	0.0548979
sp|O75369|FLNB_HUMAN	FLNB	FLNB_HUMAN Filamin-B	1	5.21908	6.34423	5.95053	6.30831	5.56205	7.4629	5.95616	7.33385	5.95554	6.57874	1.10464	0.14358	0.0876749	0.146146
sp|P22415|USF1_HUMAN	USF1	USF1_HUMAN Upstream stimulatory factor 1	2	6.06253	5.68711	6.30045	5.66297	6.65718	6.29006	6.19351	7.05166	5.92826	6.5481	1.10456	0.143467	0.0519996	0.0596564
sp|Q8WVV5|BT2A2_HUMAN	BTN2A2	BT2A2_HUMAN Butyrophilin subfamily 2 member A2	1	5.02315	7.7374	5.66478	6.11414	7.17982	8.99298	5.94724	4.98472	6.13487	6.77619	1.10454	0.143442	0.188817	0.255233
sp|O43505|B3GN1_HUMAN	B3GNT1	B3GN1_HUMAN N-acetyllactosaminide beta-1,3-N-acetylglucosaminyltransferase	1	6.36109	5.99903	6.23731	4.9443	5.55172	6.80767	7.15601	6.48663	5.88543	6.50051	1.10451	0.143404	0.10962	0.106001
sp|Q9HA64|KT3K_HUMAN	FN3KRP	KT3K_HUMAN Ketosamine-3-kinase	6	5.95423	6.0845	5.50425	5.75949	6.02639	7.06076	6.50324	6.14645	5.82562	6.43421	1.10447	0.143352	0.0433365	0.0721461
sp|Q9H6L4|ARMC7_HUMAN	ARMC7	ARMC7_HUMAN Armadillo repeat-containing protein 7	1	5.37943	6.80295	6.45421	5.43271	5.27147	7.19862	6.29647	7.81657	6.01732	6.64578	1.10444	0.143317	0.119714	0.166816
sp|Q5D1E8|ZC12A_HUMAN	ZC3H12A	ZC12A_HUMAN Ribonuclease ZC3H12A	1	5.61477	4.99386	5.32549	6.94901	7.55522	5.50954	4.62085	7.58548	5.72078	6.31777	1.10435	0.143203	0.149842	0.236035
sp|Q9NV35|NUD15_HUMAN	NUDT15	NUD15_HUMAN Probable 8-oxo-dGTP diphosphatase NUDT15	8	5.79224	5.2635	6.13407	6.41952	5.96582	6.38839	6.8819	6.83462	5.90233	6.51768	1.10426	0.143074	0.0842259	0.0659549
sp|Q5TBB1|RNH2B_HUMAN	RNASEH2B	RNH2B_HUMAN Ribonuclease H2 subunit B	9	5.71935	5.73703	6.16696	6.34741	6.59781	6.29477	6.62519	6.95026	5.99269	6.61701	1.10418	0.142976	0.0524401	0.0404883
sp|Q8IZT6|ASPM_HUMAN	ASPM	ASPM_HUMAN Abnormal spindle-like microcephaly-associated protein	1	5.43805	5.69369	6.45932	5.76298	6.86293	6.88963	6.07764	5.95651	5.83851	6.44668	1.10416	0.142956	0.0748181	0.0773484
sp|Q02218|ODO1_HUMAN	OGDH	ODO1_HUMAN 2-oxoglutarate dehydrogenase, mitochondrial	37	5.60986	5.77305	5.93714	6.44488	6.08393	5.98939	7.06956	7.08858	5.94123	6.55786	1.10379	0.142464	0.0608245	0.0919693
sp|Q9H2A2|AL8A1_HUMAN	ALDH8A1	AL8A1_HUMAN Aldehyde dehydrogenase family 8 member A1	1	6.69876	5.94281	7.446	4.67931	5.61206	8.22942	6.32636	7.16488	6.19172	6.83318	1.1036	0.142217	0.190633	0.164868
sp|Q9NSE4|SYIM_HUMAN	IARS2	SYIM_HUMAN Isoleucine--tRNA ligase, mitochondrial	43	5.82627	5.65796	6.00386	6.27759	6.26857	6.35271	6.77315	6.83282	5.94142	6.55681	1.10358	0.142187	0.0445855	0.0438258
sp|Q9BTU6|P4K2A_HUMAN	PI4K2A	P4K2A_HUMAN Phosphatidylinositol 4-kinase type 2-alpha	16	5.38522	5.50626	6.42197	6.48078	6.07494	5.876	7.10557	7.20014	5.94856	6.56416	1.10349	0.142071	0.0980401	0.104459
sp|Q9Y6N6|LAMC3_HUMAN	LAMC3	LAMC3_HUMAN Laminin subunit gamma-3	2	5.7113	5.95049	5.84357	5.70133	6.37866	6.06975	5.68394	7.47083	5.80167	6.40079	1.10327	0.141782	0.0204278	0.119967
sp|Q5F1R6-2|DJC21_HUMAN	DNAJC21	DJC21_HUMAN Isoform 2 of DnaJ homolog subfamily C member 21	4	6.19716	6.07836	5.89028	5.43839	6.59301	6.63175	6.54783	6.26904	5.90105	6.51041	1.10326	0.141777	0.0564835	0.0252711
sp|P51795-2|CLCN5_HUMAN	CLCN5	CLCN5_HUMAN Isoform 2 of H(+)/Cl(-) exchange transporter 5	2	5.82068	5.70279	6.21882	6.48864	6.05939	5.9706	6.86355	7.83899	6.05773	6.68313	1.10324	0.141747	0.0598097	0.130024
sp|Q9H0R4|HDHD2_HUMAN	HDHD2	HDHD2_HUMAN Haloacid dehalogenase-like hydrolase domain-containing protein 2	3	5.81353	5.96209	6.16377	5.57044	5.91866	7.25643	7.01652	5.74474	5.87746	6.48409	1.10321	0.141711	0.0425336	0.117667
sp|Q5SQI0|ATAT_HUMAN	ATAT1	ATAT_HUMAN Alpha-tubulin N-acetyltransferase	4	6.04497	5.40136	6.42392	6.67516	6.9627	6.53764	6.63312	6.94444	6.13635	6.76947	1.10318	0.141663	0.0903221	0.0319445
sp|O95625|ZBT11_HUMAN	ZBTB11	ZBT11_HUMAN Zinc finger and BTB domain-containing protein 11	1	5.73329	5.84552	6.8032	6.03374	5.70626	7.25488	5.90031	8.06669	6.10394	6.73203	1.1029	0.141302	0.0790267	0.167151
sp|O00257|CBX4_HUMAN	CBX4	CBX4_HUMAN E3 SUMO-protein ligase CBX4	6	5.8462	6.24349	6.35542	5.8262	6.22295	6.97578	6.51628	7.05321	6.06783	6.69205	1.10287	0.141269	0.0447374	0.0586339
sp|P48735|IDHP_HUMAN	IDH2	IDHP_HUMAN Isocitrate dehydrogenase [NADP], mitochondrial	29	5.58602	5.58553	6.01741	6.7436	5.91039	6.07607	7.20614	7.20151	5.98314	6.59853	1.10285	0.141241	0.0913036	0.106418
sp|Q96RW7|HMCN1_HUMAN	HMCN1	HMCN1_HUMAN Hemicentin-1	1	6.21449	6.29129	6.00927	6.04537	6.62422	7.79086	6.61012	6.06132	6.14011	6.77163	1.10285	0.14124	0.0219479	0.107549
sp|Q13753|LAMC2_HUMAN	LAMC2	LAMC2_HUMAN Laminin subunit gamma-2	1	6.19415	6.14204	5.98515	5.56459	6.50184	7.09128	7.17902	5.56981	5.97148	6.58549	1.10282	0.141201	0.0477996	0.112502
sp|Q8IZ07|AN13A_HUMAN	ANKRD13A	AN13A_HUMAN Ankyrin repeat domain-containing protein 13A	6	5.41066	5.78095	6.43277	6.5515	6.11123	5.83084	7.1079	7.61025	6.04397	6.66506	1.10276	0.14112	0.0895601	0.125294
sp|Q9Y2V0|CO041_HUMAN	C15orf41	CO041_HUMAN Uncharacterized protein C15orf41	1	5.16575	5.75575	5.11949	7.96933	6.22102	6.86917	6.81832	6.56905	6.00258	6.61939	1.10276	0.141116	0.2237	0.0447467
sp|Q8IZ40|RCOR2_HUMAN	RCOR2	RCOR2_HUMAN REST corepressor 2	2	4.98982	5.45649	7.04454	6.23497	6.67236	5.89589	6.37608	7.21463	5.93146	6.53974	1.10255	0.140847	0.15215	0.08442
sp|P14618-2|KPYM_HUMAN	PKM	KPYM_HUMAN Isoform M1 of Pyruvate kinase PKM	231	5.66797	5.65617	6.12031	6.40259	6.12714	6.09714	7.03935	7.02892	5.96176	6.57314	1.10255	0.140844	0.0611846	0.0810073
sp|Q8IYR2|SMYD4_HUMAN	SMYD4	SMYD4_HUMAN SET and MYND domain-containing protein 4	2	5.24966	4.80904	5.62781	7.6365	6.00721	6.94775	6.51499	6.24126	5.83075	6.4278	1.1024	0.140644	0.214288	0.0628517
sp|Q9NUU7|DD19A_HUMAN	DDX19A	DD19A_HUMAN ATP-dependent RNA helicase DDX19A	4	5.41313	5.57059	5.91231	6.36848	5.8756	6.34828	6.93368	6.4866	5.81613	6.41104	1.10229	0.1405	0.0727459	0.0679605
sp|P06746|DPOLB_HUMAN	POLB	DPOLB_HUMAN DNA polymerase beta	11	5.36563	5.94631	6.16533	6.43308	6.04209	6.49334	6.97906	6.83622	5.97759	6.58768	1.10206	0.140207	0.0759407	0.063291
sp|Q96SL8|FIZ1_HUMAN	FIZ1	FIZ1_HUMAN Flt3-interacting zinc finger protein 1	1	5.17007	5.32985	6.58352	6.44761	6.73474	5.95293	6.57673	6.66709	5.88276	6.48287	1.10201	0.140139	0.12506	0.0554038
sp|P60484|PTEN_HUMAN	PTEN	PTEN_HUMAN Phosphatidylinositol 3,4,5-trisphosphate 3-phosphatase and dual-specificity protein phosphatase PTEN	6	5.95038	5.81979	5.90803	6.30074	6.40705	6.54175	6.87818	6.59117	5.99474	6.60454	1.10172	0.139762	0.0352195	0.0300291
sp|Q9Y6B6|SAR1B_HUMAN	SAR1B	SAR1B_HUMAN GTP-binding protein SAR1b	14	5.76393	6.17858	6.10578	5.88947	6.12979	6.50696	6.01538	7.7182	5.98444	6.59258	1.10162	0.139627	0.0320056	0.118201
sp|Q13564|ULA1_HUMAN	NAE1	ULA1_HUMAN NEDD8-activating enzyme E1 regulatory subunit	16	5.67711	5.53996	6.21886	6.48681	6.10403	6.19538	6.67176	7.38182	5.98068	6.58825	1.10159	0.139584	0.0747318	0.0887455
sp|Q14653|IRF3_HUMAN	IRF3	IRF3_HUMAN Interferon regulatory factor 3	6	5.67868	5.82716	6.42919	6.19041	6.02822	6.25819	7.27023	7.01676	6.03136	6.64335	1.10147	0.139428	0.0566029	0.0894397
sp|Q9BYC5|FUT8_HUMAN	FUT8	FUT8_HUMAN Alpha-(1,6)-fucosyltransferase	5	5.55355	5.42816	6.7104	6.41404	6.36138	6.38907	6.8737	6.9277	6.02654	6.63796	1.10146	0.139411	0.104928	0.0458564
sp|Q8NHP6|MSPD2_HUMAN	MOSPD2	MSPD2_HUMAN Motile sperm domain-containing protein 2	15	5.76692	5.76563	6.08786	6.63085	6.36698	6.59586	6.88762	6.85764	6.06281	6.67702	1.10131	0.139218	0.0672801	0.0366535
sp|P12956|XRCC6_HUMAN	XRCC6	XRCC6_HUMAN X-ray repair cross-complementing protein 6	87	5.78774	5.59309	6.16155	6.24468	6.47837	6.2724	6.82955	6.61621	5.94677	6.54913	1.10129	0.139199	0.0518537	0.0357792
sp|P03915|NU5M_HUMAN	MT-ND5	NU5M_HUMAN NADH-ubiquinone oxidoreductase chain 5	5	5.56767	5.65021	6.5171	6.02769	6.31689	6.24947	6.63168	6.97118	5.94067	6.5423	1.10127	0.139174	0.072944	0.0505786
sp|Q9BYN8|RT26_HUMAN	MRPS26	RT26_HUMAN 28S ribosomal protein S26, mitochondrial	8	5.52479	5.55391	6.0741	6.55826	6.37612	5.8858	6.75305	7.09507	5.92776	6.52751	1.10118	0.139045	0.0827074	0.079491
sp|Q96B70|LENG9_HUMAN	LENG9	LENG9_HUMAN Leukocyte receptor cluster member 9	1	5.33124	5.68897	6.16999	7.12791	6.8008	6.80124	6.19445	6.98131	6.07953	6.69445	1.10115	0.139006	0.128108	0.0513855
sp|Q8NE00|TM104_HUMAN	TMEM104	TM104_HUMAN Transmembrane protein 104	1	6.06667	5.20438	5.84681	5.97563	5.59303	5.76345	7.73976	6.3319	5.77337	6.35704	1.1011	0.13894	0.067535	0.153285
sp|Q9NRF8|PYRG2_HUMAN	CTPS2	PYRG2_HUMAN CTP synthase 2	10	5.77903	5.94227	6.24887	6.25441	6.43547	6.5026	6.767	6.96848	6.05614	6.66839	1.10109	0.138938	0.0388664	0.0368872
sp|O95757|HS74L_HUMAN	HSPA4L	HS74L_HUMAN Heat shock 70 kDa protein 4L	35	5.49867	5.77376	6.00512	6.66611	6.11628	6.22762	6.83898	7.1804	5.98591	6.59082	1.10105	0.138886	0.0832757	0.0766826
sp|Q9Y303-3|NAGA_HUMAN	AMDHD2	NAGA_HUMAN Isoform 3 of Putative N-acetylglucosamine-6-phosphate deacetylase	6	5.99077	5.73137	5.92453	6.34234	6.568	6.41756	6.55442	6.87069	5.99725	6.60267	1.10095	0.138747	0.0425232	0.0289525
sp|Q9HA77|SYCM_HUMAN	CARS2	SYCM_HUMAN Probable cysteine--tRNA ligase, mitochondrial	12	5.71273	5.96506	5.94928	6.13425	6.18708	6.57955	6.64875	6.74354	5.94033	6.53973	1.1009	0.138688	0.0291734	0.0373901
sp|Q8N4Q0|ZADH2_HUMAN	ZADH2	ZADH2_HUMAN Zinc-binding alcohol dehydrogenase domain-containing protein 2	7	5.56296	5.76794	6.08655	6.45789	6.22599	6.17541	6.78078	7.09801	5.96883	6.57005	1.10073	0.138454	0.0654699	0.0679133
sp|Q9Y4L1|HYOU1_HUMAN	HYOU1	HYOU1_HUMAN Hypoxia up-regulated protein 1	73	5.95577	5.87032	6.14827	6.18705	6.42576	6.24149	6.86829	7.05699	6.04035	6.64813	1.10062	0.138316	0.0251495	0.0569766
sp|Q9NPA3|M1IP1_HUMAN	MID1IP1	M1IP1_HUMAN Mid1-interacting protein 1	9	5.41226	5.63371	5.73669	6.48415	6.05855	6.03297	6.59535	6.91694	5.8167	6.40095	1.10044	0.138085	0.079959	0.0672975
sp|Q9H3P7|GCP60_HUMAN	ACBD3	GCP60_HUMAN Golgi resident protein GCP60	20	5.82368	5.81113	5.98769	6.2877	6.33037	6.49368	6.72807	6.75897	5.97755	6.57777	1.10041	0.138045	0.0371158	0.0308708
sp|Q9ULH1-2|ASAP1_HUMAN	ASAP1	ASAP1_HUMAN Isoform 1 of Arf-GAP with SH3 domain, ANK repeat and PH domain-containing protein 1	15	5.80986	5.7319	6.17455	6.2501	6.29489	6.41244	6.84188	6.82366	5.9916	6.59322	1.10041	0.138041	0.043176	0.0425956
sp|P20073|ANXA7_HUMAN	ANXA7	ANXA7_HUMAN Annexin A7	26	5.69217	5.58654	6.04912	6.38156	6.19732	6.10922	6.80433	6.97828	5.92735	6.52229	1.10037	0.137991	0.0610312	0.0664608
sp|Q15436|SC23A_HUMAN	SEC23A	SC23A_HUMAN Protein transport protein Sec23A	23	5.50928	5.56351	6.0749	6.44089	6.27097	6.29314	6.65025	6.73968	5.89715	6.48851	1.10028	0.137871	0.0751377	0.0371954
sp|P53667|LIMK1_HUMAN	LIMK1	LIMK1_HUMAN LIM domain kinase 1	9	5.65011	5.58832	6.14233	6.50217	6.51927	6.48482	6.64289	6.6272	5.97073	6.56855	1.10012	0.137666	0.0724199	0.0119246
sp|Q9UL40-2|ZN346_HUMAN	ZNF346	ZN346_HUMAN Isoform 2 of Zinc finger protein 346	2	6.66995	6.03893	6.22974	6.07936	7.08885	7.21685	6.82767	6.38557	6.2545	6.87974	1.09997	0.13746	0.0461877	0.0533595
sp|Q9Y375|CIA30_HUMAN	NDUFAF1	CIA30_HUMAN Complex I intermediate-associated protein 30, mitochondrial	6	5.46492	5.63597	6.17941	6.39746	6.12549	6.28464	6.85807	6.77454	5.91944	6.51069	1.09988	0.137349	0.074474	0.0553625
sp|Q9BQP7|MGME1_HUMAN	MGME1	MGME1_HUMAN Mitochondrial genome maintenance exonuclease 1	16	5.74963	5.72006	5.95783	6.14713	6.30135	6.44755	6.53679	6.64187	5.89366	6.48189	1.09981	0.13725	0.033828	0.0222467
sp|P07954|FUMH_HUMAN	FH	FUMH_HUMAN Fumarate hydratase, mitochondrial	37	5.69002	5.99616	5.83169	6.17941	6.29733	6.45831	6.65972	6.64608	5.92432	6.51536	1.09977	0.137195	0.0356353	0.0263943
sp|Q2M296-3|MTHSD_HUMAN	MTHFSD	MTHSD_HUMAN Isoform 3 of Methenyltetrahydrofolate synthase domain-containing protein	4	5.53602	5.50723	6.1528	6.29958	6.49141	6.07504	6.40081	6.8697	5.87391	6.45924	1.09965	0.137044	0.0700281	0.0506053
sp|P22694|KAPCB_HUMAN	PRKACB	KAPCB_HUMAN cAMP-dependent protein kinase catalytic subunit beta	19	5.84773	5.59847	6.37666	6.51485	6.36426	5.97009	6.96113	7.46461	6.08443	6.69002	1.09953	0.13689	0.0711891	0.0983182
sp|P51608-2|MECP2_HUMAN	MECP2	MECP2_HUMAN Isoform B of Methyl-CpG-binding protein 2	1	6.05387	6.87736	6.03432	5.61775	7.15826	7.28744	6.79019	5.79184	6.14583	6.75693	1.09943	0.136762	0.0858372	0.100194
sp|Q8WUA8|TSK_HUMAN	TSKU	TSK_HUMAN Tsukushin	2	5.2603	5.49146	6.76325	6.73734	6.98936	5.98338	6.59427	7.09532	6.06309	6.66558	1.09937	0.136678	0.131811	0.0755102
sp|Q9Y6D9|MD1L1_HUMAN	MAD1L1	MD1L1_HUMAN Mitotic spindle assembly checkpoint protein MAD1	16	5.6993	5.89601	6.05706	6.02213	6.39924	6.62659	6.54028	6.459	5.91863	6.50628	1.09929	0.13657	0.0273295	0.0151955
sp|P53004|BIEA_HUMAN	BLVRA	BIEA_HUMAN Biliverdin reductase A	27	5.55148	5.62838	6.46568	6.2925	6.13864	6.20105	6.83162	7.14187	5.98451	6.5783	1.09922	0.136481	0.077223	0.0743373
sp|Q9H788|SH24A_HUMAN	SH2D4A	SH24A_HUMAN SH2 domain-containing protein 4A	12	5.69972	5.71571	6.33097	6.51667	6.33348	6.45434	6.8222	7.05388	6.06577	6.66597	1.09895	0.136126	0.0693049	0.049771
sp|P18850|ATF6A_HUMAN	ATF6	ATF6A_HUMAN Cyclic AMP-dependent transcription factor ATF-6 alpha	5	5.88057	5.5963	6.55533	6.47699	6.45031	6.73462	7.11758	6.63104	6.1273	6.73339	1.09892	0.136082	0.0758697	0.0418494
sp|Q8WW59|SPRY4_HUMAN	SPRYD4	SPRY4_HUMAN SPRY domain-containing protein 4	11	5.68217	5.84151	6.35724	6.29026	6.47431	6.54339	6.68757	6.85652	6.04279	6.64045	1.0989	0.136064	0.0549422	0.0254867
sp|Q07960|RHG01_HUMAN	ARHGAP1	RHG01_HUMAN Rho GTPase-activating protein 1	26	5.67771	5.85368	5.95657	6.46927	6.34576	6.19971	6.66476	7.11529	5.98931	6.58138	1.09885	0.136001	0.0567779	0.0616076
sp|P08133|ANXA6_HUMAN	ANXA6	ANXA6_HUMAN Annexin A6	62	5.77215	5.62108	6.10647	6.38608	6.34475	6.26187	6.74459	6.89553	5.97144	6.56168	1.09884	0.135986	0.0574141	0.046713
sp|Q9NY97|B3GN2_HUMAN	B3GNT2	B3GN2_HUMAN UDP-GlcNAc:betaGal beta-1,3-N-acetylglucosaminyltransferase 2	3	5.58712	5.96682	5.63253	6.23815	6.06394	6.32628	6.93827	6.41001	5.85616	6.43462	1.09878	0.135902	0.0522199	0.0569888
sp|Q5VSL9|STRP1_HUMAN	STRIP1	STRP1_HUMAN Striatin-interacting protein 1	15	5.68153	5.51792	6.41578	6.40374	6.13621	6.31872	7.11246	6.82234	6.00474	6.59743	1.0987	0.135802	0.0786787	0.0681378
sp|Q9Y4C4|MFHA1_HUMAN	MFHAS1	MFHA1_HUMAN Malignant fibrous histiocytoma-amplified sequence 1	2	5.42206	6.96546	5.99845	5.64738	5.38458	5.49932	6.44099	9.0791	6.00834	6.601	1.09864	0.135718	0.113298	0.260343
sp|Q6XUX3|DUSTY_HUMAN	DSTYK	DUSTY_HUMAN Dual serine/threonine and tyrosine protein kinase	1	5.31888	5.67031	5.60557	7.19677	6.15318	6.32642	6.98031	6.6761	5.94788	6.534	1.09854	0.135591	0.142316	0.0564057
sp|P23025|XPA_HUMAN	XPA	XPA_HUMAN DNA repair protein complementing XP-A cells	3	5.30312	6.54309	5.80904	6.30643	6.36985	6.70372	6.57557	6.67274	5.99042	6.58047	1.0985	0.135533	0.0919693	0.022894
sp|Q8N5S9|KKCC1_HUMAN	CAMKK1	KKCC1_HUMAN Calcium/calmodulin-dependent protein kinase kinase 1	4	5.41501	5.94311	6.3654	6.14407	6.18404	6.4091	6.52428	7.10045	5.9669	6.55447	1.09847	0.135498	0.0680993	0.0595702
sp|Q9Y5X3|SNX5_HUMAN	SNX5	SNX5_HUMAN Sorting nexin-5	22	5.87767	5.76615	5.93962	6.21187	6.36439	6.36622	6.7573	6.64985	5.94883	6.53444	1.09844	0.135458	0.031852	0.0306327
sp|Q9GZZ9|UBA5_HUMAN	UBA5	UBA5_HUMAN Ubiquitin-like modifier-activating enzyme 5	16	5.70329	5.54611	6.31484	6.35777	6.38614	6.2087	6.85181	6.83007	5.9805	6.56918	1.09843	0.135447	0.0695921	0.0490436
sp|Q9H1B5|XYLT2_HUMAN	XYLT2	XYLT2_HUMAN Xylosyltransferase 2	1	6.43308	6.49679	7.43488	5.62672	8.42826	6.97967	5.24292	7.89789	6.49787	7.13718	1.09839	0.135389	0.113824	0.195798
sp|Q92871|PMM1_HUMAN	PMM1	PMM1_HUMAN Phosphomannomutase 1	3	5.70517	5.63782	6.22225	6.69065	6.42537	6.53929	6.85805	6.81872	6.06397	6.66036	1.09835	0.135336	0.0812427	0.0317362
sp|Q92925|SMRD2_HUMAN	SMARCD2	SMRD2_HUMAN SWI/SNF-related matrix-associated actin-dependent regulator of chromatin subfamily D member 2	25	5.73445	5.76763	6.22985	6.28282	6.34262	6.12517	6.86695	7.04048	6.00369	6.5938	1.09829	0.135262	0.0487777	0.0653384
sp|Q15785|TOM34_HUMAN	TOMM34	TOM34_HUMAN Mitochondrial import receptor subunit TOM34	26	5.82847	5.9614	5.85127	6.2745	6.2062	6.27161	6.7055	7.08252	5.97891	6.56646	1.09827	0.135233	0.0343591	0.0623192
sp|Q9BYC8|RM32_HUMAN	MRPL32	RM32_HUMAN 39S ribosomal protein L32, mitochondrial	2	5.84471	5.88851	6.15041	6.4485	6.25643	5.98192	6.9479	7.53509	6.08303	6.68034	1.09819	0.13513	0.0457886	0.104774
sp|P57740|NU107_HUMAN	NUP107	NU107_HUMAN Nuclear pore complex protein Nup107	22	5.53189	5.25402	6.00988	6.13277	5.41519	6.6306	7.31532	5.81789	5.73214	6.29475	1.09815	0.135075	0.0716712	0.134655
sp|P68371|TBB4B_HUMAN	TUBB4B	TBB4B_HUMAN Tubulin beta-4B chain	44	5.1327	5.09175	6.39059	6.4177	5.91232	6.54646	5.99228	6.84205	5.75819	6.32328	1.09814	0.135058	0.129582	0.0705704
sp|P08238|HS90B_HUMAN	HSP90AB1	HS90B_HUMAN Heat shock protein HSP 90-beta	125	5.84028	5.75588	6.02412	6.12904	6.13083	6.19189	6.91676	6.84032	5.93733	6.51995	1.09813	0.135047	0.0286205	0.063802
sp|Q86UA1|PRP39_HUMAN	PRPF39	PRP39_HUMAN Pre-mRNA-processing factor 39	9	5.58327	5.65055	6.3408	6.39386	6.12801	6.16276	7.0803	6.94536	5.99212	6.57911	1.09796	0.134825	0.0725394	0.0766122
tr|H7BZJ3|H7BZJ3_HUMAN	PDIA3	H7BZJ3_HUMAN Thioredoxin (Fragment)	3	6.02642	5.97344	5.73402	6.12065	6.49988	6.04126	6.86973	6.77937	5.96363	6.54756	1.09791	0.134766	0.0276236	0.0568828
sp|Q9NYG5|APC11_HUMAN	ANAPC11	APC11_HUMAN Anaphase-promoting complex subunit 11	1	6.15155	5.97454	5.61723	5.6245	6.57197	5.42824	7.38393	6.27134	5.84196	6.41387	1.0979	0.134744	0.0454197	0.125951
sp|Q9H7Z7|PGES2_HUMAN	PTGES2	PGES2_HUMAN Prostaglandin E synthase 2	23	5.4738	5.42605	5.94298	6.49066	5.88099	6.11091	6.63237	6.98726	5.83337	6.40288	1.09763	0.134391	0.0850969	0.0781825
sp|P49591|SYSC_HUMAN	SARS	SYSC_HUMAN Serine--tRNA ligase, cytoplasmic	35	5.65514	5.83463	6.12499	6.2852	6.26266	6.136	6.90979	6.92457	5.97499	6.55825	1.09762	0.134376	0.0474102	0.0636919
sp|Q8IUR0|TPPC5_HUMAN	TRAPPC5	TPPC5_HUMAN Trafficking protein particle complex subunit 5	6	5.68889	5.51934	6.09319	6.45022	6.19717	6.48996	6.54333	6.8388	5.93791	6.51731	1.09758	0.134322	0.0703692	0.040331
sp|Q9UH65|SWP70_HUMAN	SWAP70	SWP70_HUMAN Switch-associated protein 70	37	5.83816	5.94089	5.95906	6.21036	6.2176	6.75726	6.78743	6.52271	5.98712	6.57125	1.09756	0.134306	0.0264002	0.0401433
sp|P13378|HXD8_HUMAN	HOXD8	HXD8_HUMAN Homeobox protein Hox-D8	1	5.481	5.62966	6.14733	5.97316	7.52031	6.26517	5.28197	6.42952	5.80779	6.37424	1.09753	0.134265	0.0527112	0.143826
sp|Q8TBC4|UBA3_HUMAN	UBA3	UBA3_HUMAN NEDD8-activating enzyme E1 catalytic subunit	17	5.54862	5.68777	5.96265	6.48968	6.15208	6.06535	6.90543	6.87614	5.92218	6.49975	1.09753	0.134256	0.0701782	0.0697061
sp|O75317|UBP12_HUMAN	USP12	UBP12_HUMAN Ubiquitin carboxyl-terminal hydrolase 12	1	5.78856	5.64915	5.89734	6.91077	6.15949	6.13644	7.29602	7.0166	6.06145	6.65214	1.09745	0.134154	0.0949029	0.0891914
sp|Q9BUQ8|DDX23_HUMAN	DDX23	DDX23_HUMAN Probable ATP-dependent RNA helicase DDX23	16	6.01245	5.77656	6.26755	6.46016	6.57345	6.52009	6.79395	7.01667	6.12918	6.72604	1.09738	0.134063	0.0486426	0.0337701
sp|Q6IPR1|LYRM5_HUMAN	LYRM5	LYRM5_HUMAN LYR motif-containing protein 5	2	5.36143	6.7681	5.07556	5.65588	5.79629	6.31529	6.11118	6.86104	5.71524	6.27095	1.09723	0.133869	0.12962	0.0713746
sp|Q9BSC4|NOL10_HUMAN	NOL10	NOL10_HUMAN Nucleolar protein 10	1	6.30002	5.77757	6.25029	6.15074	6.60419	6.81513	6.62939	6.80946	6.11965	6.71454	1.09721	0.133839	0.0386216	0.0168837
sp|Q99569|PKP4_HUMAN	PKP4	PKP4_HUMAN Plakophilin-4	4	5.61383	5.61495	6.23854	6.61119	5.96953	6.73174	6.94178	6.77559	6.01963	6.60466	1.09719	0.13381	0.081739	0.0655562
sp|P48995|TRPC1_HUMAN	TRPC1	TRPC1_HUMAN Short transient receptor potential channel 1	2	6.27493	5.59652	6.46241	6.27042	7.02301	6.51007	6.5878	6.87281	6.15107	6.74842	1.09711	0.133713	0.061838	0.035634
sp|O95394-4|AGM1_HUMAN	PGM3	AGM1_HUMAN Isoform 3 of Phosphoacetylglucosamine mutase	25	5.62535	5.76349	6.20227	6.40468	6.01674	6.20375	6.98732	7.11767	5.99895	6.58137	1.09709	0.133679	0.0609428	0.0838596
sp|Q13131-2|AAPK1_HUMAN	PRKAA1	AAPK1_HUMAN Isoform 2 of 5'-AMP-activated protein kinase catalytic subunit alpha-1	18	5.8	5.6856	6.07635	6.21488	6.4378	6.16696	6.61198	6.86686	5.94421	6.5209	1.09702	0.133587	0.0410243	0.0451601
sp|Q8NBI6|XXLT1_HUMAN	XXYLT1	XXLT1_HUMAN Xyloside xylosyltransferase 1	7	5.35186	5.78125	6.34934	6.37654	6.17532	6.79938	6.97822	6.21992	5.96475	6.54321	1.09698	0.133538	0.0825184	0.0620621
sp|O43148-2|MCES_HUMAN	RNMT	MCES_HUMAN Isoform 2 of mRNA cap guanine-N7 methyltransferase	16	5.74948	5.84815	5.91674	6.21961	6.45143	6.64476	6.72444	6.21431	5.93349	6.50874	1.09695	0.133495	0.0341656	0.0349229
sp|Q9NWW6|NRK1_HUMAN	NMRK1	NRK1_HUMAN Nicotinamide riboside kinase 1	1	6.29435	6.0447	6.45644	5.62668	7.20193	6.84088	6.62725	6.11814	6.10554	6.69705	1.09688	0.133406	0.059189	0.0676402
sp|P50750-2|CDK9_HUMAN	CDK9	CDK9_HUMAN Isoform 2 of Cyclin-dependent kinase 9	11	5.84431	5.50642	6.17125	6.53748	6.26054	6.20577	6.86996	7.05232	6.01487	6.59715	1.09681	0.13331	0.0734279	0.0647901
sp|P78312|F193A_HUMAN	FAM193A	F193A_HUMAN Protein FAM193A	3	6.03673	5.66649	5.94594	6.26689	6.49176	6.58767	6.33887	6.80638	5.97901	6.55617	1.09653	0.132946	0.0415297	0.0298588
sp|Q8N2K1|UB2J2_HUMAN	UBE2J2	UB2J2_HUMAN Ubiquitin-conjugating enzyme E2 J2	4	5.54857	5.44319	5.48053	5.90424	5.81881	6.33409	5.94416	6.43802	5.59413	6.13377	1.09646	0.13286	0.0377701	0.0487143
sp|Q15008|PSMD6_HUMAN	PSMD6	PSMD6_HUMAN 26S proteasome non-ATPase regulatory subunit 6	28	5.7922	5.88092	5.91547	6.12659	6.12714	6.48718	6.88632	6.4995	5.9288	6.50004	1.09635	0.132709	0.0239031	0.047703
sp|O95271|TNKS1_HUMAN	TNKS	TNKS1_HUMAN Tankyrase-1	3	5.58142	5.54623	6.25658	6.1036	5.91794	6.31166	6.66439	6.8564	5.87196	6.4376	1.09633	0.132681	0.0615682	0.0642187
sp|Q9Y2Z4|SYYM_HUMAN	YARS2	SYYM_HUMAN Tyrosine--tRNA ligase, mitochondrial	16	5.97108	5.87135	5.98002	6.09363	6.36481	6.44072	6.66247	6.75036	5.97902	6.55459	1.09626	0.132597	0.0152044	0.0277073
sp|P31749|AKT1_HUMAN	AKT1	AKT1_HUMAN RAC-alpha serine/threonine-protein kinase	8	5.93084	5.48902	6.29323	6.34253	6.40602	6.17673	7.03062	6.75719	6.01391	6.59264	1.09623	0.132554	0.0657054	0.0572067
sp|Q5RI15-2|COX20_HUMAN	COX20	COX20_HUMAN Isoform 2 of Cytochrome c oxidase protein 20 homolog	3	5.63354	5.96369	6.19791	6.60742	6.246	6.48335	6.61018	7.40915	6.10064	6.68717	1.09614	0.132435	0.0671344	0.0754329
sp|A4D2P6|GRD2I_HUMAN	GRID2IP	GRD2I_HUMAN Delphilin	1	6.23071	4.06042	5.28079	7.47029	6.20561	5.33487	5.9619	7.75308	5.76055	6.31386	1.09605	0.132316	0.25086	0.162688
sp|Q8NFW8|NEUA_HUMAN	CMAS	NEUA_HUMAN N-acylneuraminate cytidylyltransferase	6	5.51103	5.52501	6.43069	6.28771	6.28684	6.49925	6.61779	6.63183	5.93861	6.50893	1.09604	0.132295	0.0823735	0.0245131
sp|Q00610|CLH1_HUMAN	CLTC	CLH1_HUMAN Clathrin heavy chain 1	166	5.65956	5.66209	6.14136	6.36653	6.05209	6.16317	6.95618	6.94543	5.95739	6.52922	1.09599	0.132231	0.0595166	0.0748841
sp|P33176|KINH_HUMAN	KIF5B	KINH_HUMAN Kinesin-1 heavy chain	56	5.62426	5.61017	5.98695	6.35593	6.21033	6.01721	6.75631	6.85543	5.89433	6.45982	1.09594	0.132167	0.060009	0.0633598
sp|Q9NQ48|LZTL1_HUMAN	LZTFL1	LZTL1_HUMAN Leucine zipper transcription factor-like protein 1	7	5.62754	5.75276	6.18833	6.25224	6.24744	6.3031	6.71709	6.83852	5.95522	6.52654	1.09594	0.132164	0.0522917	0.0452337
sp|Q05469|LIPS_HUMAN	LIPE	LIPS_HUMAN Hormone-sensitive lipase	1	5.48921	5.85289	7.06184	6.75698	7.40014	6.44157	7.33513	6.39432	6.29023	6.89279	1.09579	0.131975	0.117762	0.0796897
sp|Q9NV31|IMP3_HUMAN	IMP3	IMP3_HUMAN U3 small nucleolar ribonucleoprotein protein IMP3	1	5.02437	6.30079	6.38028	5.69162	6.73366	6.54048	5.79075	6.57106	5.84926	6.40899	1.09569	0.131841	0.107726	0.0656559
sp|Q5T3U5|MRP7_HUMAN	ABCC10	MRP7_HUMAN Multidrug resistance-associated protein 7	1	6.6473	6.32337	4.85787	5.69768	6.20769	5.92634	7.75275	5.88881	5.88156	6.4439	1.09561	0.131736	0.133995	0.137199
sp|Q9NQX7|ITM2C_HUMAN	ITM2C	ITM2C_HUMAN Integral membrane protein 2C	3	6.13154	5.86211	5.89333	5.86122	6.77549	5.88826	6.54439	6.81008	5.93705	6.50455	1.09559	0.131704	0.0219835	0.0657165
sp|Q9Y281|COF2_HUMAN	CFL2	COF2_HUMAN Cofilin-2	14	5.88848	5.72053	6.10215	6.1266	6.31017	6.48195	6.76051	6.55568	5.95944	6.52708	1.09525	0.13126	0.032193	0.0285798
sp|Q9BXT5|TEX15_HUMAN	TEX15	TEX15_HUMAN Testis-expressed sequence 15 protein	3	6.46174	5.90373	5.67908	7.03718	7.17178	6.41005	6.89028	6.99774	6.27043	6.86746	1.09521	0.131212	0.0969489	0.0475074
sp|P10619|PPGB_HUMAN	CTSA	PPGB_HUMAN Lysosomal protective protein	10	5.98141	5.76392	5.77552	6.19904	6.27205	6.51515	6.77963	6.41086	5.92997	6.49442	1.09519	0.131176	0.0346245	0.0330492
sp|Q8IZM8|ZN654_HUMAN	ZNF654	ZN654_HUMAN Zinc finger protein 654	1	5.54139	5.03839	5.57382	6.45315	5.64255	6.58825	7.03843	5.48812	5.65169	6.18934	1.09513	0.131103	0.104013	0.120574
sp|Q96E14|RMI2_HUMAN	RMI2	RMI2_HUMAN RecQ-mediated genome instability protein 2	2	5.55734	6.12511	6.09872	5.94534	6.23979	7.30435	6.17397	6.26464	5.93163	6.49569	1.09509	0.131054	0.0441381	0.0832035
sp|Q9BZX2|UCK2_HUMAN	UCK2	UCK2_HUMAN Uridine-cytidine kinase 2	4	5.74416	6.09465	6.41499	6.4812	6.52863	6.51401	6.79556	7.24882	6.18375	6.77176	1.09509	0.131048	0.0546908	0.0507056
sp|Q6NW29|RWDD4_HUMAN	RWDD4	RWDD4_HUMAN RWD domain-containing protein 4	3	5.36957	5.76234	6.6662	6.37685	6.4134	6.1757	7.05121	6.83301	6.04374	6.61833	1.09507	0.131026	0.0970502	0.0598937
sp|P19388|RPAB1_HUMAN	POLR2E	RPAB1_HUMAN DNA-directed RNA polymerases I, II, and III subunit RPABC1	12	5.63045	5.76591	6.24401	6.34149	6.28821	6.53453	6.71949	6.71903	5.99547	6.56532	1.09505	0.130993	0.0583726	0.0311078
sp|Q9HD33|RM47_HUMAN	MRPL47	RM47_HUMAN 39S ribosomal protein L47, mitochondrial	12	5.66839	5.41067	6.69622	6.41258	6.42855	6.12583	6.96656	6.96514	6.04697	6.62152	1.09502	0.130951	0.100292	0.0628802
sp|P82909|RT36_HUMAN	MRPS36	RT36_HUMAN 28S ribosomal protein S36, mitochondrial	5	5.97007	5.87321	6.06234	6.63397	7.15237	6.58549	5.98902	7.14353	6.1349	6.7176	1.09498	0.130907	0.0556747	0.0823792
sp|P49840|GSK3A_HUMAN	GSK3A	GSK3A_HUMAN Glycogen synthase kinase-3 alpha	17	5.47789	5.60299	6.35774	6.61229	6.06626	6.2526	6.86552	7.15037	6.01273	6.58369	1.09496	0.130876	0.0927213	0.0773454
sp|Q969S2|NEIL2_HUMAN	NEIL2	NEIL2_HUMAN Endonuclease 8-like 2	4	5.76313	5.84801	6.24856	6.21393	6.20222	6.84528	6.49857	6.81175	6.01841	6.58946	1.09488	0.130777	0.0413061	0.0457856
sp|P49354|FNTA_HUMAN	FNTA	FNTA_HUMAN Protein farnesyltransferase/geranylgeranyltransferase type-1 subunit alpha	13	5.8086	5.75058	6.31883	6.28163	6.43638	6.42559	6.91356	6.67644	6.03991	6.61299	1.09488	0.130776	0.0499851	0.0349961
sp|Q9H9S4|CB39L_HUMAN	CAB39L	CB39L_HUMAN Calcium-binding protein 39-like	1	6.14748	5.63909	5.65087	6.15268	6.40674	6.09262	6.69093	6.63338	5.89753	6.45592	1.09468	0.130511	0.0494558	0.0420535
sp|Q9Y6M1|IF2B2_HUMAN	IGF2BP2	IF2B2_HUMAN Insulin-like growth factor 2 mRNA-binding protein 2	24	5.85512	5.62164	6.33172	6.1741	6.31772	6.36962	7.00215	6.55741	5.99564	6.56173	1.09442	0.13016	0.05313	0.0474183
sp|Q9BRX5|PSF3_HUMAN	GINS3	PSF3_HUMAN DNA replication complex GINS protein PSF3	13	5.79811	5.85836	6.30706	6.23379	6.2407	6.22348	6.98648	7.02986	6.04933	6.62013	1.09436	0.130084	0.0426856	0.0677441
sp|Q96CB8|INT12_HUMAN	INTS12	INT12_HUMAN Integrator complex subunit 12	4	5.86271	5.67586	5.60969	6.30279	6.27803	6.91636	6.31097	6.15583	5.86276	6.4153	1.09424	0.129936	0.0532692	0.0530986
sp|Q12840|KIF5A_HUMAN	KIF5A	KIF5A_HUMAN Kinesin heavy chain isoform 5A	12	5.75326	5.50216	5.94461	6.3577	6.03814	6.00513	6.84465	6.88871	5.88943	6.44416	1.09419	0.129863	0.0612867	0.0757903
sp|Q8TCE6|FA45A_HUMAN	FAM45A	FA45A_HUMAN Protein FAM45A	4	5.99028	5.46842	6.52721	6.69145	6.28298	6.64749	6.98468	7.08404	6.16934	6.7498	1.09409	0.129728	0.0899584	0.0537771
sp|O15160|RPAC1_HUMAN	POLR1C	RPAC1_HUMAN DNA-directed RNA polymerases I and III subunit RPAC1	13	5.73281	5.58619	6.32585	6.05755	6.33743	6.24864	6.60041	6.7447	5.9256	6.48279	1.09403	0.129655	0.0559693	0.0354435
sp|P21399|ACOC_HUMAN	ACO1	ACOC_HUMAN Cytoplasmic aconitate hydratase	39	5.74723	5.8042	6.09927	6.27105	6.29714	6.34169	6.67245	6.85976	5.98044	6.54276	1.09403	0.129648	0.0414135	0.0412072
sp|O75689|ADAP1_HUMAN	ADAP1	ADAP1_HUMAN Arf-GAP with dual PH domain-containing protein 1	6	5.42082	5.76216	6.0814	6.58598	6.07711	5.86219	6.89814	7.25402	5.96259	6.52287	1.09397	0.129567	0.0830934	0.10133
sp|Q8IWB9-2|TEX2_HUMAN	TEX2	TEX2_HUMAN Isoform 2 of Testis-expressed sequence 2 protein	7	5.78528	5.51238	6.58922	6.60532	6.45191	6.20166	7.04378	7.09596	6.12305	6.69833	1.09395	0.12955	0.0912682	0.0659166
sp|Q6PHR2|ULK3_HUMAN	ULK3	ULK3_HUMAN Serine/threonine-protein kinase ULK3	3	5.93579	5.62394	6.49465	6.35778	6.03006	6.22311	7.50185	6.95053	6.10304	6.67639	1.09394	0.12954	0.065251	0.101577
sp|Q9NR46|SHLB2_HUMAN	SH3GLB2	SHLB2_HUMAN Endophilin-B2	15	5.94042	5.98774	6.27575	6.28126	6.44314	6.26915	6.98741	7.08151	6.12129	6.6953	1.09377	0.129313	0.0298258	0.0597231
sp|O75525|KHDR3_HUMAN	KHDRBS3	KHDR3_HUMAN KH domain-containing, RNA-binding, signal transduction-associated protein 3	4	5.85541	6.04125	6.41478	6.23347	6.45842	6.4527	6.9598	6.9713	6.13623	6.71056	1.0936	0.12908	0.0393519	0.0438845
sp|P29350-3|PTN6_HUMAN	PTPN6	PTN6_HUMAN Isoform 2 of Tyrosine-protein phosphatase non-receptor type 6	13	5.78225	5.71016	6.26404	6.52183	6.27383	6.39752	6.90976	6.96861	6.06957	6.63743	1.09356	0.12903	0.0640989	0.0531675
sp|Q8N441|FGRL1_HUMAN	FGFRL1	FGRL1_HUMAN Fibroblast growth factor receptor-like 1	2	5.79359	5.70151	6.43856	5.57981	6.23404	5.91357	6.39433	7.16982	5.87837	6.42794	1.09349	0.128941	0.0652541	0.0829884
sp|P40337|VHL_HUMAN	VHL	VHL_HUMAN Von Hippel-Lindau disease tumor suppressor	3	6.10451	5.31455	6.02675	6.38028	6.15509	5.85036	7.09497	6.95193	5.95652	6.51309	1.09344	0.128871	0.0762303	0.0929096
sp|Q9Y222|DMTF1_HUMAN	DMTF1	DMTF1_HUMAN Cyclin-D-binding Myb-like transcription factor 1	1	6.32954	5.72542	5.9833	6.12758	6.76662	5.98712	7.18331	6.48283	6.04146	6.60497	1.09327	0.128655	0.0420561	0.0760663
sp|Q8NEZ2|VP37A_HUMAN	VPS37A	VP37A_HUMAN Vacuolar protein sorting-associated protein 37A	9	5.89638	5.91938	6.01316	6.31856	6.17965	6.96695	6.66147	6.58932	6.03687	6.59935	1.09317	0.128523	0.0322133	0.0491199
sp|Q15428|SF3A2_HUMAN	SF3A2	SF3A2_HUMAN Splicing factor 3A subunit 2	11	5.79902	5.62949	6.1274	6.20112	6.39565	6.25771	6.65034	6.66617	5.93926	6.49247	1.09314	0.128484	0.0455528	0.0307511
sp|Q8N0S6-2|CENPL_HUMAN	CENPL	CENPL_HUMAN Isoform 2 of Centromere protein L	1	5.92687	4.93742	6.0706	6.33721	6.40425	5.55086	6.22053	7.26073	5.81802	6.35909	1.093	0.128291	0.105051	0.110729
sp|O75323|NIPS2_HUMAN	GBAS	NIPS2_HUMAN Protein NipSnap homolog 2	6	5.7247	5.52202	6.66985	6.6654	5.86053	5.76812	7.41983	7.81922	6.14549	6.71692	1.09298	0.128272	0.0990256	0.157153
sp|Q9H8H0|NOL11_HUMAN	NOL11	NOL11_HUMAN Nucleolar protein 11	11	5.86531	5.55982	6.15257	6.44057	6.35743	6.74016	6.94761	6.20576	6.00457	6.56274	1.09296	0.128238	0.062992	0.0519858
sp|P51668|UB2D1_HUMAN	UBE2D1	UB2D1_HUMAN Ubiquitin-conjugating enzyme E2 D1	3	5.7814	5.79624	6.13802	6.25145	6.81672	6.07599	6.61123	6.69098	5.99178	6.54873	1.09295	0.128231	0.0398819	0.0498286
sp|Q6ICH7|ASPH2_HUMAN	ASPHD2	ASPH2_HUMAN Aspartate beta-hydroxylase domain-containing protein 2	1	5.3394	5.18728	7.17642	6.63595	6.03391	7.10217	6.90139	6.56341	6.08476	6.65022	1.09293	0.128201	0.160368	0.0702475
sp|Q13216|ERCC8_HUMAN	ERCC8	ERCC8_HUMAN DNA excision repair protein ERCC-8	2	6.03859	6.16434	6.33376	5.63556	6.74908	6.47971	6.59235	6.59588	6.04306	6.60426	1.09287	0.128116	0.0492089	0.0167469
sp|Q9GZS9-2|CHST5_HUMAN	CHST5	CHST5_HUMAN Isoform 2 of Carbohydrate sulfotransferase 5	1	5.22136	5.6892	6.76219	6.55115	6.37185	6.07025	6.90466	7.12667	6.05598	6.61836	1.09286	0.128114	0.119647	0.0730659
sp|O43242|PSMD3_HUMAN	PSMD3	PSMD3_HUMAN 26S proteasome non-ATPase regulatory subunit 3	44	5.86703	5.73469	6.15498	6.32729	6.31058	6.27938	6.82199	6.90754	6.021	6.57987	1.09282	0.128057	0.0447142	0.050314
sp|O95568|MET18_HUMAN	METTL18	MET18_HUMAN Histidine protein methyltransferase 1 homolog	1	5.27731	6.15519	6.22877	6.01403	6.32579	6.40919	6.55316	6.58323	5.91883	6.46784	1.09276	0.127974	0.0738086	0.0187695
sp|Q5GLZ8|HERC4_HUMAN	HERC4	HERC4_HUMAN Probable E3 ubiquitin-protein ligase HERC4	27	5.72145	5.65049	6.30743	6.6029	6.31291	6.18263	6.92464	7.11156	6.07057	6.63293	1.09264	0.127816	0.0759561	0.0685025
sp|Q9Y6X4|F169A_HUMAN	FAM169A	F169A_HUMAN Soluble lamin-associated protein of 75 kDa	3	5.33003	5.38784	6.17103	6.53464	6.26933	5.7771	6.58634	6.96037	5.85588	6.39829	1.09262	0.127798	0.101298	0.0783439
sp|P53990-2|IST1_HUMAN	IST1	IST1_HUMAN Isoform 2 of IST1 homolog	3	5.76835	5.75355	6.22551	6.43747	6.33042	6.39142	6.97008	6.73175	6.04622	6.60592	1.09257	0.127725	0.0563379	0.0454438
sp|Q7Z7A3|CTU1_HUMAN	CTU1	CTU1_HUMAN Cytoplasmic tRNA 2-thiolation protein 1	8	5.41826	5.87178	6.60246	6.4535	6.51687	6.0427	7.06026	6.97831	6.0865	6.64954	1.09251	0.127641	0.0896669	0.0706783
sp|Q86TU7|SETD3_HUMAN	SETD3	SETD3_HUMAN Histone-lysine N-methyltransferase setd3	24	5.70541	5.72171	6.09866	6.44506	6.37428	6.42573	6.7611	6.62428	5.99271	6.54635	1.09239	0.127482	0.0587472	0.0273755
sp|Q5VW32|BROX_HUMAN	BROX	BROX_HUMAN BRO1 domain-containing protein BROX	12	5.59421	5.82034	6.27112	6.58093	6.08586	6.20173	7.07403	7.14562	6.06665	6.62681	1.09233	0.127414	0.0731098	0.0845811
sp|Q99487|PAFA2_HUMAN	PAFAH2	PAFA2_HUMAN Platelet-activating factor acetylhydrolase 2, cytoplasmic	4	5.59851	6.00615	5.89885	6.27335	6.34731	6.63125	6.43627	6.55704	5.94421	6.49297	1.09232	0.127392	0.0469578	0.0194117
sp|Q96EG1|ARSG_HUMAN	ARSG	ARSG_HUMAN Arylsulfatase G	1	5.69507	5.15142	5.85404	7.40922	6.43591	7.43009	6.15025	6.31776	6.02744	6.5835	1.09226	0.127311	0.160776	0.087557
sp|P82921|RT21_HUMAN	MRPS21	RT21_HUMAN 28S ribosomal protein S21, mitochondrial	4	5.85056	5.39742	6.17833	6.24779	6.25069	5.9192	7.05695	6.63041	5.91853	6.46431	1.09222	0.127259	0.0655897	0.0758686
sp|P13639|EF2_HUMAN	EEF2	EF2_HUMAN Elongation factor 2	266	5.8158	5.85228	5.915	6.16551	6.23049	6.37388	6.59121	6.73808	5.93715	6.48341	1.09201	0.126984	0.0265544	0.0347688
sp|Q5T0D9|TPRGL_HUMAN	TPRG1L	TPRGL_HUMAN Tumor protein p63-regulated gene 1-like protein	7	6.01249	5.25382	6.3038	6.05727	6.34479	6.49502	6.74717	6.2142	5.90684	6.4503	1.092	0.126977	0.0768261	0.0354666
sp|Q9NPE3|NOP10_HUMAN	NOP10	NOP10_HUMAN H/ACA ribonucleoprotein complex subunit 3	2	5.6887	6.2254	5.96056	6.12564	6.69071	7.19965	6.30554	6.00861	6.00007	6.55113	1.09184	0.126763	0.0390927	0.0785644
sp|P62699|YPEL5_HUMAN	YPEL5	YPEL5_HUMAN Protein yippee-like 5	5	6.57583	6.1266	6.04448	6.01465	6.86874	6.36283	7.1628	6.6412	6.19039	6.75889	1.09184	0.126757	0.0422079	0.0502406
sp|Q96AC1-3|FERM2_HUMAN	FERMT2	FERM2_HUMAN Isoform 3 of Fermitin family homolog 2	21	6.09048	5.58159	6.23383	6.22261	6.37515	6.17366	7.10078	6.69455	6.03213	6.58603	1.09183	0.126743	0.050949	0.061443
sp|Q9BQE5|APOL2_HUMAN	APOL2	APOL2_HUMAN Apolipoprotein L2	1	6.01797	5.65086	6.95295	6.15606	6.18879	6.76677	6.74336	7.35233	6.19446	6.76281	1.09175	0.126645	0.0885898	0.0702657
tr|A6PVV8|A6PVV8_HUMAN	PI4KB	A6PVV8_HUMAN Phosphatidylinositol 4-kinase beta (Fragment)	1	4.93937	6.54394	6.30692	5.53346	7.13702	5.59525	6.46962	6.26177	5.83092	6.36591	1.09175	0.126644	0.12596	0.0997687
sp|Q13838-2|DX39B_HUMAN	DDX39B	DX39B_HUMAN Isoform 2 of Spliceosome RNA helicase DDX39B	41	5.63024	5.76532	6.33969	6.25648	6.32981	6.45112	6.75959	6.64957	5.99793	6.54752	1.09163	0.126484	0.0587846	0.0295205
sp|Q9BTZ2|DHRS4_HUMAN	DHRS4	DHRS4_HUMAN Dehydrogenase/reductase SDR family member 4	5	5.86835	5.81785	6.01195	6.71787	5.99882	6.35408	7.35542	6.94282	6.104	6.66279	1.09154	0.126369	0.0683849	0.0906471
sp|Q8TCB7|METL6_HUMAN	METTL6	METL6_HUMAN Methyltransferase-like protein 6	1	5.38118	6.23972	5.92979	7.00686	6.29171	6.24592	7.69287	6.57458	6.13939	6.70127	1.09152	0.12634	0.110528	0.101004
sp|Q86TL2|TM110_HUMAN	TMEM110	TM110_HUMAN Transmembrane protein 110	2	5.68368	5.98018	6.14863	6.54178	6.90511	6.6241	5.93295	7.12082	6.08857	6.64574	1.09151	0.126328	0.0588139	0.0777769
sp|P0C7P0|CISD3_HUMAN	CISD3	CISD3_HUMAN CDGSH iron-sulfur domain-containing protein 3, mitochondrial	2	6.46929	6.15907	5.82171	5.5085	6.25733	6.54748	7.08643	6.25895	5.98964	6.53755	1.09148	0.12628	0.0694063	0.0597344
sp|Q8N6S4|AN13C_HUMAN	ANKRD13C	AN13C_HUMAN Ankyrin repeat domain-containing protein 13C	1	5.8351	5.93683	6.56252	6.79798	7.22686	6.73528	6.61898	6.84962	6.28311	6.85769	1.09145	0.126243	0.0748649	0.038426
sp|P41227|NAA10_HUMAN	NAA10	NAA10_HUMAN N-alpha-acetyltransferase 10	24	5.82	5.5324	6.11523	6.37984	6.26788	6.13513	6.82309	6.80172	5.96187	6.50695	1.09143	0.126218	0.0614605	0.0548566
sp|Q96E22|NGBR_HUMAN	NUS1	NGBR_HUMAN Nogo-B receptor	2	5.9037	5.66265	6.45459	5.84308	7.41075	5.72342	6.02549	6.88493	5.96601	6.51115	1.09137	0.126147	0.05723	0.119142
sp|Q92665|RT31_HUMAN	MRPS31	RT31_HUMAN 28S ribosomal protein S31, mitochondrial	17	5.84647	5.54218	6.26612	6.36249	6.29901	6.21198	6.90084	6.79769	6.00432	6.55238	1.09128	0.126019	0.0634421	0.0529903
sp|Q9Y2U9|KLDC2_HUMAN	KLHDC2	KLDC2_HUMAN Kelch domain-containing protein 2	1	5.6975	6.18081	5.59788	6.35061	5.36739	7.40786	6.61843	6.6077	5.9567	6.50035	1.09127	0.126003	0.061402	0.129706
sp|Q969M3-3|YIPF5_HUMAN	YIPF5	YIPF5_HUMAN Isoform 3 of Protein YIPF5	1	5.73386	6.15836	6.2801	5.79508	6.71195	6.7028	6.55133	6.18779	5.99185	6.53847	1.09123	0.125951	0.0447916	0.0374879
sp|P43490|NAMPT_HUMAN	NAMPT	NAMPT_HUMAN Nicotinamide phosphoribosyltransferase	34	5.78513	5.62183	6.14808	6.34822	6.26248	6.04704	6.68343	7.08426	5.97581	6.5193	1.09095	0.125582	0.0555031	0.0705766
sp|O43709|WBS22_HUMAN	WBSCR22	WBS22_HUMAN Ribosome biogenesis methyltransferase WBSCR22	6	5.6932	5.91915	6.25025	6.11042	6.12647	6.15093	6.9732	6.89994	5.99326	6.53763	1.09083	0.125429	0.0403335	0.0706262
sp|P26639|SYTC_HUMAN	TARS	SYTC_HUMAN Threonine--tRNA ligase, cytoplasmic	90	5.88434	5.83353	6.03281	6.23658	6.42649	6.31885	6.66997	6.74984	5.99681	6.54129	1.09079	0.125378	0.0301539	0.0309184
sp|Q9ULM6|CNOT6_HUMAN	CNOT6	CNOT6_HUMAN CCR4-NOT transcription complex subunit 6	6	5.54238	5.59138	6.19965	6.64471	6.20428	6.42493	6.81269	6.71273	5.99453	6.53866	1.09077	0.125348	0.0878391	0.0423589
sp|Q9NP92|RT30_HUMAN	MRPS30	RT30_HUMAN 28S ribosomal protein S30, mitochondrial	14	5.29569	5.0464	6.13974	7.18544	5.32528	5.41173	7.74256	7.33516	5.91682	6.45368	1.09074	0.125301	0.163353	0.19594
sp|Q8N6U8-6|GP161_HUMAN	GPR161	GP161_HUMAN Isoform 6 of G-protein coupled receptor 161	1	5.487	6.63513	5.83399	7.21095	7.15549	5.04716	7.15335	8.09424	6.29177	6.86256	1.09072	0.125281	0.123795	0.187803
sp|Q9Y5J1|UTP18_HUMAN	UTP18	UTP18_HUMAN U3 small nucleolar RNA-associated protein 18 homolog	4	5.53084	5.58371	6.32863	5.91154	6.39991	6.0244	6.72751	6.31762	5.83868	6.36736	1.09055	0.125053	0.0629397	0.0454149
sp|Q5TEJ8|THMS2_HUMAN	THEMIS2	THMS2_HUMAN Protein THEMIS2	2	5.99049	5.40144	5.42516	6.1344	6.74922	5.52986	6.0891	6.66072	5.73787	6.25723	1.09051	0.125007	0.0661368	0.0905084
sp|Q8WVM8|SCFD1_HUMAN	SCFD1	SCFD1_HUMAN Sec1 family domain-containing protein 1	30	5.70867	5.59683	6.10913	6.40153	6.11477	6.31209	6.73582	6.80837	5.95404	6.49276	1.09048	0.124964	0.0622489	0.0514064
sp|Q9H063|MAF1_HUMAN	MAF1	MAF1_HUMAN Repressor of RNA polymerase III transcription MAF1 homolog	6	5.30373	5.21402	5.94493	6.74014	5.76321	5.58074	6.79598	7.16115	5.8007	6.32527	1.09043	0.124899	0.121677	0.122137
sp|Q9UPQ8|DOLK_HUMAN	DOLK	DOLK_HUMAN Dolichol kinase	1	6.29186	4.52754	6.50308	6.63454	5.87854	6.94434	7.61887	5.67893	5.98925	6.53017	1.09031	0.124744	0.164402	0.139961
sp|Q04446|GLGB_HUMAN	GBE1	GLGB_HUMAN 1,4-alpha-glucan-branching enzyme	14	5.86766	5.59303	6.28105	6.33354	6.35922	6.33402	7.09306	6.45757	6.01882	6.56097	1.09008	0.124428	0.0585027	0.0546735
sp|Q8WZ82|OVCA2_HUMAN	OVCA2	OVCA2_HUMAN Ovarian cancer-associated gene 2 protein	2	5.58998	5.11142	6.80749	6.44093	6.18206	5.83439	6.72736	7.36207	5.98746	6.52647	1.09002	0.12436	0.129496	0.102257
sp|P62873|GBB1_HUMAN	GNB1	GBB1_HUMAN Guanine nucleotide-binding protein G(I)/G(S)/G(T) subunit beta-1	8	5.52589	6.13981	6.04336	6.43924	6.32229	6.25722	6.74936	6.99302	6.03707	6.58047	1.09001	0.124341	0.0629764	0.0533588
sp|Q9NUQ7|UFSP2_HUMAN	UFSP2	UFSP2_HUMAN Ufm1-specific protease 2	9	5.84848	5.64308	6.5372	6.25596	6.15811	6.35538	6.94469	7.01208	6.07118	6.61756	1.09	0.124324	0.0661715	0.0642596
sp|O60229|KALRN_HUMAN	KALRN	KALRN_HUMAN Kalirin	2	6.12715	5.39189	6.39155	6.37408	6.59462	6.61867	7.18504	6.07012	6.07117	6.61711	1.08992	0.124228	0.0771959	0.0688262
tr|G3V5Q0|G3V5Q0_HUMAN	KTN1	G3V5Q0_HUMAN Kinectin (Fragment)	1	5.5389	6.53399	6.43148	6.00179	5.50702	6.89265	6.87045	7.43973	6.12654	6.67746	1.08992	0.124227	0.074196	0.123328
sp|Q9Y230|RUVB2_HUMAN	RUVBL2	RUVB2_HUMAN RuvB-like 2	64	5.72735	5.82389	6.05837	6.25463	6.13299	6.32007	6.85277	6.70356	5.96606	6.50235	1.08989	0.124182	0.0397814	0.0512327
sp|P07902|GALT_HUMAN	GALT	GALT_HUMAN Galactose-1-phosphate uridylyltransferase	8	5.73849	6.23653	5.87493	6.0006	6.33411	6.90684	6.05569	6.6968	5.96264	6.49836	1.08985	0.124125	0.0354968	0.0582036
sp|Q9H0P0|5NT3A_HUMAN	NT5C3A	5NT3A_HUMAN Cytosolic 5'-nucleotidase 3A	13	5.59321	5.77788	6.03969	6.63035	6.15365	5.96476	7.01421	7.06212	6.01028	6.54869	1.08958	0.123772	0.0752288	0.0871586
sp|Q86UY8|NT5D3_HUMAN	NT5DC3	NT5D3_HUMAN 5'-nucleotidase domain-containing protein 3	19	5.97555	5.94261	6.09899	6.19299	6.43694	6.69363	6.69079	6.55519	6.05254	6.59414	1.08948	0.123644	0.0190531	0.0186697
sp|O15235|RT12_HUMAN	MRPS12	RT12_HUMAN 28S ribosomal protein S12, mitochondrial	3	5.36387	5.72184	5.76412	6.43761	5.49032	5.63097	7.07701	7.17022	5.82186	6.34213	1.08936	0.123487	0.0769596	0.142698
sp|Q9BZZ5|API5_HUMAN	API5	API5_HUMAN Apoptosis inhibitor 5	23	5.80878	5.71236	6.11586	6.31527	6.4484	6.14909	6.80482	6.68953	5.98807	6.52296	1.08933	0.123436	0.0463955	0.0444785
sp|Q86U42|PABP2_HUMAN	PABPN1	PABP2_HUMAN Polyadenylate-binding protein 2	1	6.24516	5.53281	7.47268	5.31564	6.72788	6.40499	7.53259	6.09419	6.14157	6.68991	1.08928	0.123379	0.158293	0.0924521
sp|Q16740|CLPP_HUMAN	CLPP	CLPP_HUMAN Putative ATP-dependent Clp protease proteolytic subunit, mitochondrial	19	5.64254	6.00427	5.95039	6.15356	6.63436	6.32851	6.44544	6.45837	5.93769	6.46667	1.08909	0.123121	0.0361614	0.0195049
sp|Q96Q11|TRNT1_HUMAN	TRNT1	TRNT1_HUMAN CCA tRNA nucleotidyltransferase 1, mitochondrial	12	5.70799	5.62412	6.40941	6.4218	6.22252	6.09582	7.06408	6.93139	6.04083	6.57845	1.089	0.123001	0.0718667	0.0744712
sp|Q9BSV6|SEN34_HUMAN	TSEN34	SEN34_HUMAN tRNA-splicing endonuclease subunit Sen34	12	5.75436	5.70291	6.00575	6.38113	5.68804	6.36772	6.94586	6.96406	5.96104	6.49142	1.08897	0.122971	0.0519613	0.0928833
sp|P31150|GDIA_HUMAN	GDI1	GDIA_HUMAN Rab GDP dissociation inhibitor alpha	44	5.69344	5.60296	6.23097	6.38736	6.2398	6.2333	6.73948	6.8276	5.97868	6.51004	1.08888	0.12284	0.0650096	0.0488258
sp|P50991|TCPD_HUMAN	CCT4	TCPD_HUMAN T-complex protein 1 subunit delta	122	5.78894	5.69325	5.99793	6.11739	6.07653	6.19543	6.8489	6.57377	5.89938	6.42366	1.08887	0.122832	0.0327417	0.055109
sp|Q6IEG0|SNR48_HUMAN	SNRNP48	SNR48_HUMAN U11/U12 small nuclear ribonucleoprotein 48 kDa protein	1	6.38791	5.69943	5.78662	6.25432	6.37123	5.88578	6.88606	7.12904	6.03207	6.56803	1.08885	0.122807	0.0563745	0.084317
sp|Q96E35|ZMY19_HUMAN	ZMYND19	ZMY19_HUMAN Zinc finger MYND domain-containing protein 19	2	6.0541	5.69701	6.70021	6.86976	6.63079	7.47696	6.27898	7.18329	6.33027	6.8925	1.08882	0.122761	0.0867736	0.0781779
sp|Q9H672|ASB7_HUMAN	ASB7	ASB7_HUMAN Ankyrin repeat and SOCS box protein 7	2	5.86467	5.87529	6.24064	5.99569	6.21011	6.45301	7.30841	6.13388	5.99407	6.52635	1.0888	0.12274	0.0291601	0.0825633
sp|O76054|S14L2_HUMAN	SEC14L2	S14L2_HUMAN SEC14-like protein 2	14	5.95348	6.11305	5.78069	6.0221	6.28977	6.6483	6.27038	6.77908	5.96733	6.49688	1.08874	0.122662	0.0235527	0.0394189
sp|Q9UBP0|SPAST_HUMAN	SPAST	SPAST_HUMAN Spastin	11	5.58994	5.66435	6.00282	6.59271	6.28729	6.24752	6.70575	6.72487	5.96246	6.49136	1.08871	0.122614	0.0766425	0.0399338
sp|Q53RE8|ANR39_HUMAN	ANKRD39	ANR39_HUMAN Ankyrin repeat domain-containing protein 39	1	6.41982	5.2186	6.15042	5.98476	6.56604	6.62841	6.41766	6.26914	5.9434	6.47031	1.08866	0.122547	0.0867163	0.0248249
sp|Q9P0J0|NDUAD_HUMAN	NDUFA13	NDUAD_HUMAN NADH dehydrogenase [ubiquinone] 1 alpha subcomplex subunit 13	5	5.57623	5.65559	5.91541	6.17967	5.9699	6.78295	6.76829	5.87209	5.83173	6.34831	1.08858	0.122449	0.0468948	0.0779841
sp|Q93015-2|NAT6_HUMAN	NAT6	NAT6_HUMAN Isoform 2 of N-acetyltransferase 6	2	5.92666	6.12822	6.24597	6.19909	6.50367	5.7953	7.593	6.77726	6.12499	6.66731	1.08854	0.122398	0.0229875	0.11144
sp|P30039|PBLD_HUMAN	PBLD	PBLD_HUMAN Phenazine biosynthesis-like domain-containing protein	2	4.97298	6.17072	5.83733	6.98331	5.65259	6.91499	6.49734	7.02037	5.99108	6.52132	1.0885	0.122347	0.138883	0.0953236
sp|P19784|CSK22_HUMAN	CSNK2A2	CSK22_HUMAN Casein kinase II subunit alpha'	15	5.63519	5.47823	6.05934	6.28512	6.19413	6.23892	6.52146	6.57831	5.86447	6.38321	1.08845	0.12228	0.0635488	0.0305051
sp|Q9Y3D8|KAD6_HUMAN	AK6	KAD6_HUMAN Adenylate kinase isoenzyme 6	7	5.65997	5.61407	6.1729	6.0792	6.05655	6.11241	6.79809	6.63757	5.88153	6.40116	1.08835	0.12214	0.048548	0.0581442
sp|Q9P0L2|MARK1_HUMAN	MARK1	MARK1_HUMAN Serine/threonine-protein kinase MARK1	5	6.04666	5.29551	6.6302	6.22469	6.26679	6.67563	6.66314	6.72802	6.04926	6.5834	1.0883	0.122072	0.0923571	0.032344
sp|P30101|PDIA3_HUMAN	PDIA3	PDIA3_HUMAN Protein disulfide-isomerase A3	66	5.74663	5.67519	5.87693	6.28034	5.97216	6.10036	6.58215	7.00606	5.89477	6.41518	1.08828	0.122054	0.0458497	0.0737977
sp|Q5TEU4|NDUF5_HUMAN	NDUFAF5	NDUF5_HUMAN NADH dehydrogenase [ubiquinone] 1 alpha subcomplex assembly factor 5	1	5.46321	5.98533	5.79302	7.39164	4.24766	6.44043	9.27191	6.84754	6.1583	6.70189	1.08827	0.122035	0.138029	0.30722
tr|H0YEH1|H0YEH1_HUMAN	PICALM	H0YEH1_HUMAN Phosphatidylinositol-binding clathrin assembly protein (Fragment)	1	6.48643	5.71871	6.79579	5.46059	5.56403	5.52703	7.72329	7.80623	6.11538	6.65514	1.08826	0.122028	0.102847	0.192604
sp|P68104|EF1A1_HUMAN	EEF1A1	EF1A1_HUMAN Elongation factor 1-alpha 1	102	5.82052	5.68482	5.726	6.10973	6.09178	5.96511	6.8493	6.49091	5.83527	6.34927	1.08809	0.121793	0.0328332	0.0632594
sp|P18440|ARY1_HUMAN	NAT1	ARY1_HUMAN Arylamine N-acetyltransferase 1	4	5.32263	5.47255	6.37153	6.34616	5.8511	6.12558	6.90219	6.70429	5.87822	6.39579	1.08805	0.121744	0.0950019	0.0766668
sp|P82933|RT09_HUMAN	MRPS9	RT09_HUMAN 28S ribosomal protein S9, mitochondrial	26	5.78841	5.91963	5.88682	6.40614	6.27522	6.39799	6.62217	6.81563	6.00025	6.52775	1.08791	0.121564	0.0460444	0.0367234
sp|Q9Y664|KPTN_HUMAN	KPTN	KPTN_HUMAN Kaptin	1	6.04157	5.63969	6.1709	5.93485	6.28986	6.34733	6.70319	6.53724	5.94675	6.46941	1.08789	0.121531	0.0380577	0.0291097
sp|P25098|ARBK1_HUMAN	ADRBK1	ARBK1_HUMAN Beta-adrenergic receptor kinase 1	26	5.67169	5.70461	6.07832	6.37365	5.94469	6.07172	6.78743	7.11442	5.95707	6.47957	1.08771	0.121295	0.0559631	0.0868586
sp|P54284|CACB3_HUMAN	CACNB3	CACB3_HUMAN Voltage-dependent L-type calcium channel subunit beta-3	2	6.02579	5.82951	6.30313	6.54302	6.72135	6.35717	6.8938	6.89455	6.17536	6.71672	1.08766	0.121233	0.0506487	0.0376919
sp|Q92729|PTPRU_HUMAN	PTPRU	PTPRU_HUMAN Receptor-type tyrosine-protein phosphatase U	3	5.40774	5.33198	6.96106	6.38047	6.62123	6.92936	6.58297	6.05721	6.02031	6.54769	1.0876	0.121148	0.130923	0.05527
sp|Q9HBI1|PARVB_HUMAN	PARVB	PARVB_HUMAN Beta-parvin	2	5.15376	5.63001	6.53984	7.23127	6.55336	6.08958	6.75839	7.30448	6.13872	6.67645	1.0876	0.121144	0.15117	0.0754226
sp|Q9BTV5|FSD1_HUMAN	FSD1	FSD1_HUMAN Fibronectin type III and SPRY domain-containing protein 1	5	5.74929	6.07847	6.49876	6.1096	6.28531	6.19464	6.86606	7.22824	6.10903	6.64356	1.0875	0.121014	0.0502081	0.0738032
sp|Q96T60|PNKP_HUMAN	PNKP	PNKP_HUMAN Bifunctional polynucleotide phosphatase/kinase	9	5.6636	5.69502	6.46563	6.62517	6.17157	6.35217	7.14185	6.9219	6.11235	6.64687	1.08745	0.120947	0.0825254	0.0691294
sp|Q8IUX4|ABC3F_HUMAN	APOBEC3F	ABC3F_HUMAN DNA dC->dU-editing enzyme APOBEC-3F	6	6.15379	6.34487	6.14074	5.90452	6.813	6.64318	6.55832	6.67347	6.13598	6.67199	1.08736	0.120824	0.0293877	0.0158705
sp|O14908|GIPC1_HUMAN	GIPC1	GIPC1_HUMAN PDZ domain-containing protein GIPC1	17	5.72647	5.77861	6.32489	6.42523	6.37757	6.14719	6.7154	7.13321	6.0638	6.59334	1.08733	0.120788	0.0597587	0.0650563
sp|Q6UX04|CWC27_HUMAN	CWC27	CWC27_HUMAN Peptidyl-prolyl cis-trans isomerase CWC27 homolog	9	5.64968	5.60035	6.19199	6.56	6.29245	6.01128	6.85291	6.94119	6.0005	6.52446	1.08732	0.120774	0.0765456	0.0684714
sp|P13010|XRCC5_HUMAN	XRCC5	XRCC5_HUMAN X-ray repair cross-complementing protein 5	90	5.63327	5.57981	6.10273	6.21831	5.9918	6.26505	6.82135	6.50944	5.88353	6.39691	1.08726	0.120693	0.0550755	0.0552188
sp|O95067|CCNB2_HUMAN	CCNB2	CCNB2_HUMAN G2/mitotic-specific cyclin-B2	3	5.6738	5.74137	6.12428	5.8679	6.05089	6.69326	6.36393	6.34081	5.85184	6.36222	1.08722	0.120641	0.0339463	0.0412847
sp|P14625|ENPL_HUMAN	HSP90B1	ENPL_HUMAN Endoplasmin	175	5.8415	5.84857	6.09514	6.24017	6.34999	6.34597	6.65446	6.77007	6.00634	6.53012	1.0872	0.120623	0.0325439	0.0330096
sp|Q01970|PLCB3_HUMAN	PLCB3	PLCB3_HUMAN 1-phosphatidylinositol 4,5-bisphosphate phosphodiesterase beta-3	38	5.73277	5.43772	6.30903	6.63274	6.25078	5.96894	6.93916	7.04999	6.02806	6.55222	1.08695	0.120288	0.0898611	0.0802081
sp|Q15286|RAB35_HUMAN	RAB35	RAB35_HUMAN Ras-related protein Rab-35	10	5.99768	6.14701	6.04948	6.10632	6.11636	6.64796	6.82289	6.82373	6.07512	6.60274	1.08685	0.12015	0.0107503	0.0506791
sp|Q9H2K8|TAOK3_HUMAN	TAOK3	TAOK3_HUMAN Serine/threonine-protein kinase TAO3	4	6.24932	6.72283	6.18599	5.685	7.14191	6.733	6.52906	6.59299	6.21078	6.74924	1.0867	0.119949	0.0683576	0.0407877
sp|Q14142|TRI14_HUMAN	TRIM14	TRI14_HUMAN Tripartite motif-containing protein 14	1	4.69401	6.52986	5.76121	6.40879	6.44228	6.31294	6.674	5.99177	5.84847	6.35525	1.08665	0.11989	0.14369	0.0447904
sp|Q9BXJ9|NAA15_HUMAN	NAA15	NAA15_HUMAN N-alpha-acetyltransferase 15, NatA auxiliary subunit	70	5.65531	5.7281	6.23545	6.48265	6.04979	6.21454	6.92715	6.99778	6.02538	6.54732	1.08662	0.119852	0.0662857	0.0740651
sp|Q86TN4-4|TRPT1_HUMAN	TRPT1	TRPT1_HUMAN Isoform 4 of tRNA 2'-phosphotransferase 1	3	5.84885	5.95249	6.23299	6.3467	6.53156	6.60182	6.44548	6.91372	6.09526	6.62314	1.08661	0.119829	0.0382764	0.0308002
sp|P04899-4|GNAI2_HUMAN	GNAI2	GNAI2_HUMAN Isoform sGi2 of Guanine nucleotide-binding protein G(i) subunit alpha-2	21	5.70781	5.52597	6.4268	6.20232	6.11944	6.05982	6.89816	6.85196	5.96572	6.48235	1.0866	0.119818	0.0703537	0.0701154
sp|Q05655-2|KPCD_HUMAN	PRKCD	KPCD_HUMAN Isoform 2 of Protein kinase C delta type	22	5.72985	5.83349	6.27813	6.42082	6.32834	6.199	6.75094	7.08451	6.06557	6.5907	1.08657	0.119787	0.0553345	0.0614323
sp|Q9UK41|VPS28_HUMAN	VPS28	VPS28_HUMAN Vacuolar protein sorting-associated protein 28 homolog	10	5.84694	5.91172	6.13742	6.15915	7.52515	6.29881	6.33673	5.9771	6.01381	6.53445	1.08657	0.119787	0.0262341	0.104047
sp|P14618|KPYM_HUMAN	PKM	KPYM_HUMAN Pyruvate kinase PKM	34	5.55762	5.526	5.5351	6.2211	5.62833	5.91927	6.80921	6.46004	5.70995	6.20421	1.08656	0.119769	0.0597242	0.085507
sp|P0C024|NUDT7_HUMAN	NUDT7	NUDT7_HUMAN Peroxisomal coenzyme A diphosphatase NUDT7	2	6.16923	6.20719	6.48527	5.54361	6.10174	7.21846	7.36721	5.82895	6.10133	6.62909	1.0865	0.119688	0.0651676	0.117188
sp|Q14669-2|TRIPC_HUMAN	TRIP12	TRIPC_HUMAN Isoform 2 of E3 ubiquitin-protein ligase TRIP12	2	5.65153	5.95323	6.40599	5.62994	5.94438	6.8676	6.02127	6.85033	5.91017	6.42089	1.08641	0.119574	0.061249	0.0789394
sp|O94868|FCSD2_HUMAN	FCHSD2	FCSD2_HUMAN FCH and double SH3 domains protein 2	3	5.46901	6.13863	5.91721	6.47406	6.39233	6.25803	6.74671	6.67567	5.99973	6.51818	1.08641	0.119573	0.0702379	0.0354904
sp|Q8WZA1|PMGT1_HUMAN	POMGNT1	PMGT1_HUMAN Protein O-linked-mannose beta-1,2-N-acetylglucosaminyltransferase 1	7	5.9032	5.79582	6.18839	6.23491	6.59081	6.32064	6.94387	6.34935	6.03058	6.55117	1.08632	0.119455	0.0355638	0.0440347
sp|P07738|PMGE_HUMAN	BPGM	PMGE_HUMAN Bisphosphoglycerate mutase	2	5.77448	5.81843	6.068	6.70352	6.86934	6.18832	6.45305	6.9568	6.09111	6.61688	1.08632	0.119446	0.0703071	0.0544752
sp|Q9Y2Z9|COQ6_HUMAN	COQ6	COQ6_HUMAN Ubiquinone biosynthesis monooxygenase COQ6	6	5.64495	5.70959	6.39699	6.69313	6.22662	6.58852	6.7475	6.99198	6.11116	6.63865	1.08632	0.119444	0.0844478	0.0483414
sp|Q16549|PCSK7_HUMAN	PCSK7	PCSK7_HUMAN Proprotein convertase subtilisin/kexin type 7	1	5.19968	5.53836	6.44534	7.37836	6.27693	6.9866	6.78604	6.63181	6.14044	6.67034	1.0863	0.119421	0.159369	0.0449471
tr|H0YMT9|H0YMT9_HUMAN	ANXA2	H0YMT9_HUMAN Annexin (Fragment)	1	6.04362	7.43646	6.3851	5.74469	7.45065	6.92989	5.74749	7.69175	6.40247	6.95494	1.08629	0.119411	0.115161	0.124441
sp|O60701|UGDH_HUMAN	UGDH	UGDH_HUMAN UDP-glucose 6-dehydrogenase	26	5.63222	5.36296	5.99973	6.60622	6.17571	6.12146	6.41223	6.92773	5.90028	6.40928	1.08627	0.119379	0.0912072	0.0574112
sp|P17980|PRS6A_HUMAN	PSMC3	PRS6A_HUMAN 26S protease regulatory subunit 6A	58	5.79202	5.6782	6.11689	6.39398	6.32249	6.03128	6.69041	7.00554	5.99527	6.51243	1.08626	0.119371	0.0541006	0.0652924
sp|P20742|PZP_HUMAN	PZP	PZP_HUMAN Pregnancy zone protein	3	6.44241	5.36678	6.29456	6.18857	6.62664	6.34415	7.10847	6.30714	6.07308	6.5966	1.0862	0.119294	0.0794056	0.0560712
sp|Q9NRH2|SNRK_HUMAN	SNRK	SNRK_HUMAN SNF-related serine/threonine-protein kinase	4	5.79567	5.94476	6.43268	6.41309	6.11784	6.2614	6.76852	7.5525	6.14655	6.67507	1.08599	0.119005	0.0528648	0.0970982
sp|O14495|LPP3_HUMAN	PPAP2B	LPP3_HUMAN Lipid phosphate phosphohydrolase 3	2	5.6744	6.37248	6.23628	5.94188	6.94133	6.67866	6.75392	5.93364	6.05626	6.57689	1.08597	0.118978	0.0514525	0.0673306
sp|Q9BW62|KATL1_HUMAN	KATNAL1	KATL1_HUMAN Katanin p60 ATPase-containing subunit A-like 1	6	5.79174	6.62631	6.04578	5.6739	6.22982	6.19848	6.94684	6.83756	6.03443	6.55318	1.08596	0.118976	0.0702636	0.0601562
sp|Q8N1A6|CD033_HUMAN	C4orf33	CD033_HUMAN UPF0462 protein C4orf33	5	6.29912	5.98294	6.04818	6.29266	6.76103	6.90204	6.24928	6.82648	6.15573	6.68471	1.08593	0.118936	0.0266494	0.0442723
sp|Q9NXH8|TOR4A_HUMAN	TOR4A	TOR4A_HUMAN Torsin-4A	4	5.4184	6.20487	6.2987	6.49924	6.78946	6.88236	6.67412	6.1733	6.1053	6.62981	1.08591	0.118905	0.0776553	0.0476688
sp|Q8IWQ3-4|BRSK2_HUMAN	BRSK2	BRSK2_HUMAN Isoform 4 of Serine/threonine-protein kinase BRSK2	4	5.98627	6.0029	6.12498	6.11752	6.30473	5.94981	6.63262	7.42431	6.05792	6.57787	1.08583	0.118798	0.0121341	0.0956881
sp|P05091|ALDH2_HUMAN	ALDH2	ALDH2_HUMAN Aldehyde dehydrogenase, mitochondrial	29	6.05223	6.48819	6.21743	5.93949	6.88876	7.30887	6.58381	6.03562	6.17434	6.70426	1.08583	0.118795	0.0386024	0.0799163
sp|P13674-2|P4HA1_HUMAN	P4HA1	P4HA1_HUMAN Isoform 2 of Prolyl 4-hydroxylase subunit alpha-1	1	5.79954	5.68008	6.00104	7.00989	6.61861	5.75629	7.16863	7.04844	6.12264	6.64799	1.08581	0.118765	0.0990014	0.0962155
sp|Q14188|TFDP2_HUMAN	TFDP2	TFDP2_HUMAN Transcription factor Dp-2	1	5.88344	6.21558	6.39662	5.88133	6.29837	6.36197	7.10063	6.70681	6.09424	6.61695	1.08577	0.118718	0.0419338	0.0557691
sp|Q86VX9|MON1A_HUMAN	MON1A	MON1A_HUMAN Vacuolar fusion protein MON1 homolog A	5	5.09489	5.67755	6.39854	6.25757	6.06254	6.05647	6.32938	6.98936	5.85714	6.35944	1.08576	0.118703	0.101808	0.0690002
sp|Q96GM5|SMRD1_HUMAN	SMARCD1	SMRD1_HUMAN SWI/SNF-related matrix-associated actin-dependent regulator of chromatin subfamily D member 1	8	5.96505	5.8827	5.78682	6.21478	6.24869	6.27714	6.61112	6.75603	5.96234	6.47324	1.08569	0.118611	0.0307562	0.0386575
sp|Q9NWS8|RMND1_HUMAN	RMND1	RMND1_HUMAN Required for meiotic nuclear division protein 1 homolog	7	5.37628	5.36631	5.77303	6.83493	6.04969	6.01359	6.62111	6.6667	5.83764	6.33777	1.08567	0.118591	0.118424	0.055901
sp|P40425|PBX2_HUMAN	PBX2	PBX2_HUMAN Pre-B-cell leukemia transcription factor 2	3	5.22437	4.95582	6.13443	7.05845	5.81262	6.81339	5.89362	6.85402	5.84327	6.34341	1.08559	0.118484	0.163315	0.089439
sp|Q8TB40|ABHD4_HUMAN	ABHD4	ABHD4_HUMAN Abhydrolase domain-containing protein 4	1	5.97499	5.87885	6.82422	6.70969	7.63007	5.76744	6.77156	7.39028	6.34694	6.88984	1.08554	0.118409	0.0770169	0.120626
sp|Q13616|CUL1_HUMAN	CUL1	CUL1_HUMAN Cullin-1	51	5.79132	5.77883	6.08129	6.29578	6.20927	6.19185	6.80162	6.79187	5.98681	6.49865	1.0855	0.118354	0.0415756	0.0529808
sp|Q9NQ55-3|SSF1_HUMAN	PPAN	SSF1_HUMAN Isoform 3 of Suppressor of SWI4 1 homolog	9	6.02666	5.90937	6.37453	6.13739	6.81156	6.99914	6.6356	6.09085	6.11199	6.63429	1.08546	0.1183	0.0324362	0.059015
sp|P63173|RL38_HUMAN	RPL38	RL38_HUMAN 60S ribosomal protein L38	10	6.61777	6.18631	5.77625	5.63424	7.39764	6.69594	5.92583	6.26096	6.05364	6.57009	1.08531	0.11811	0.0731753	0.0967154
sp|P30291|WEE1_HUMAN	WEE1	WEE1_HUMAN Wee1-like protein kinase	1	6.07062	5.0494	5.1117	7.51512	6.89477	6.32966	5.71283	6.83539	5.93671	6.44316	1.08531	0.118105	0.193948	0.0851999
sp|P78356|PI42B_HUMAN	PIP4K2B	PI42B_HUMAN Phosphatidylinositol 5-phosphate 4-kinase type-2 beta	9	5.5736	5.74933	5.977	6.31831	6.11628	6.16932	6.68002	6.66744	5.90456	6.40826	1.08531	0.118104	0.0544478	0.0479598
sp|P22492|H1T_HUMAN	HIST1H1T	H1T_HUMAN Histone H1t	1	5.55644	5.57462	7.1768	6.47057	6.56266	6.14736	6.78536	7.39571	6.19461	6.72277	1.08526	0.118043	0.126168	0.0774585
tr|H0YLY7|H0YLY7_HUMAN	CHP1	H0YLY7_HUMAN Calcineurin B homologous protein 1 (Fragment)	1	5.66437	5.99065	6.8347	7.41341	8.00343	6.67107	7.39527	6.04166	6.47578	7.02786	1.08525	0.11803	0.122947	0.121479
sp|P84085|ARF5_HUMAN	ARF5	ARF5_HUMAN ADP-ribosylation factor 5	4	6.07303	5.91056	5.9335	5.64959	6.41035	6.18366	6.77498	6.20621	5.89167	6.3938	1.08523	0.117997	0.0299806	0.0428248
sp|Q10472|GALT1_HUMAN	GALNT1	GALT1_HUMAN Polypeptide N-acetylgalactosaminyltransferase 1	18	5.73823	5.83244	6.32261	6.42143	6.4204	6.42285	6.87692	6.6658	6.07868	6.59649	1.08519	0.117942	0.0564725	0.0332825
sp|Q9BZR6|RTN4R_HUMAN	RTN4R	RTN4R_HUMAN Reticulon-4 receptor	2	6.49448	6.00144	5.88911	6.27579	7.07911	6.1351	6.63767	6.90627	6.16521	6.68954	1.08505	0.117758	0.0442918	0.0615645
sp|P16870|CBPE_HUMAN	CPE	CBPE_HUMAN Carboxypeptidase E	4	5.94885	6.11281	6.43676	6.03049	6.87671	6.30954	6.49215	6.93592	6.13223	6.65358	1.08502	0.11772	0.0348604	0.0454151
sp|Q6UWU4-2|CF089_HUMAN	C6orf89	CF089_HUMAN Isoform 2 of Bombesin receptor-activated protein C6orf89	6	6.0449	5.64355	6.44613	6.29056	6.43377	6.6942	6.53667	6.83155	6.10628	6.62405	1.08479	0.117418	0.0573058	0.0264108
sp|P51178-2|PLCD1_HUMAN	PLCD1	PLCD1_HUMAN Isoform 2 of 1-phosphatidylinositol 4,5-bisphosphate phosphodiesterase delta-1	6	5.92451	5.90273	6.26406	5.83216	6.20245	6.48976	6.7164	6.54273	5.98086	6.48783	1.08477	0.117383	0.0322474	0.0329026
sp|P05091-2|ALDH2_HUMAN	ALDH2	ALDH2_HUMAN Isoform 2 of Aldehyde dehydrogenase, mitochondrial	2	6.23039	6.21907	7.24949	6.61614	8.35702	7.11248	6.5576	6.51787	6.57877	7.13624	1.08474	0.117346	0.0735305	0.12022
sp|Q86W34|AMZ2_HUMAN	AMZ2	AMZ2_HUMAN Archaemetzincin-2	2	5.77222	5.50543	6.39107	6.56579	6.061	6.3058	7.03102	6.88911	6.05863	6.57173	1.08469	0.117283	0.0828448	0.0704606
sp|Q96SK2|TM209_HUMAN	TMEM209	TM209_HUMAN Transmembrane protein 209	4	5.60508	4.60392	6.72911	6.81364	5.71019	7.18831	6.55351	6.30694	5.93794	6.43974	1.08451	0.11704	0.176178	0.0950158
sp|Q14CX7|NAA25_HUMAN	NAA25	NAA25_HUMAN N-alpha-acetyltransferase 25, NatB auxiliary subunit	46	5.68594	5.84482	6.04308	6.40826	6.20691	6.28102	6.673	6.84763	5.99553	6.50214	1.0845	0.117029	0.0519616	0.0473706
sp|Q9BWT3|PAPOG_HUMAN	PAPOLG	PAPOG_HUMAN Poly(A) polymerase gamma	6	6.15687	5.60652	6.34022	6.50288	6.69472	6.34307	6.99375	6.65374	6.15162	6.67132	1.08448	0.117005	0.0633851	0.0399001
sp|Q9NY33|DPP3_HUMAN	DPP3	DPP3_HUMAN Dipeptidyl peptidase 3	33	5.74675	5.83699	6.19584	6.2698	6.44656	6.33986	6.60637	6.68815	6.01234	6.52023	1.08447	0.116996	0.0430781	0.0240187
sp|P49841-2|GSK3B_HUMAN	GSK3B	GSK3B_HUMAN Isoform 2 of Glycogen synthase kinase-3 beta	13	5.58907	5.72721	6.10314	6.39704	5.94984	6.44849	6.83629	6.59284	5.95412	6.45686	1.08444	0.116947	0.0615669	0.0579207
sp|Q9Y496|KIF3A_HUMAN	KIF3A	KIF3A_HUMAN Kinesin-like protein KIF3A	5	5.67854	5.70096	6.04336	6.73103	6.15244	5.74742	6.93537	7.35739	6.03847	6.54815	1.08441	0.116905	0.0813054	0.111616
sp|O60512|B4GT3_HUMAN	B4GALT3	B4GT3_HUMAN Beta-1,4-galactosyltransferase 3	1	5.60888	6.96279	7.37767	5.47955	6.96356	5.50969	7.57982	7.5205	6.35722	6.89339	1.08434	0.116818	0.150285	0.139747
sp|Q13596|SNX1_HUMAN	SNX1	SNX1_HUMAN Sorting nexin-1	24	5.69013	5.83073	5.99569	6.50509	6.21074	6.17867	6.55273	7.10401	6.00541	6.51154	1.08428	0.116735	0.0592394	0.065995
sp|Q9Y4E8|UBP15_HUMAN	USP15	UBP15_HUMAN Ubiquitin carboxyl-terminal hydrolase 15	31	5.75843	5.77341	5.98349	6.44713	6.34758	6.21514	6.51074	6.90765	5.99062	6.49528	1.08424	0.116687	0.0536203	0.0462371
sp|P48723|HSP13_HUMAN	HSPA13	HSP13_HUMAN Heat shock 70 kDa protein 13	11	5.93016	5.97707	6.22969	6.45912	6.46207	6.44779	6.92543	6.83178	6.14901	6.66677	1.0842	0.116633	0.0398506	0.0371465
sp|Q56P03|EAPP_HUMAN	EAPP	EAPP_HUMAN E2F-associated phosphoprotein	3	5.37291	4.87755	5.83208	6.69603	6.26086	6.82827	5.5663	6.04108	5.69464	6.17413	1.0842	0.11663	0.13575	0.0848112
sp|Q9H1H9|KI13A_HUMAN	KIF13A	KI13A_HUMAN Kinesin-like protein KIF13A	11	5.84913	5.91821	6.18528	6.41096	6.328	6.59471	6.52722	6.96261	6.09089	6.60313	1.0841	0.116497	0.0423507	0.0401401
sp|Q8N131|PORIM_HUMAN	TMEM123	PORIM_HUMAN Porimin	2	6.62623	6.63579	5.12557	5.90258	7.22044	6.99777	6.07289	6.03749	6.07254	6.58215	1.08392	0.116258	0.118348	0.0934954
sp|Q8NFG4|FLCN_HUMAN	FLCN	FLCN_HUMAN Folliculin	3	5.35142	5.6039	6.42009	6.62337	6.24922	5.99018	6.77751	6.99486	5.9997	6.50294	1.08388	0.116204	0.102863	0.071285
sp|Q9H9Q2|CSN7B_HUMAN	COPS7B	CSN7B_HUMAN COP9 signalosome complex subunit 7b	7	5.82922	5.57577	6.00399	6.31676	6.29837	6.13817	6.77736	6.50043	5.93144	6.42858	1.08382	0.116119	0.0524797	0.0428933
sp|P55039|DRG2_HUMAN	DRG2	DRG2_HUMAN Developmentally-regulated GTP-binding protein 2	17	5.7647	6.11997	5.96643	6.27265	6.24679	6.35411	6.7477	6.79622	6.03094	6.5362	1.08378	0.116071	0.0359975	0.0422937
sp|Q9NQ50|RM40_HUMAN	MRPL40	RM40_HUMAN 39S ribosomal protein L40, mitochondrial	9	5.62857	6.07358	6.18957	6.40403	6.05356	6.0866	6.98429	7.20666	6.07394	6.58278	1.08377	0.116064	0.053828	0.0910078
sp|Q9BYV7|BCDO2_HUMAN	BCO2	BCDO2_HUMAN Beta,beta-carotene 9',10'-oxygenase	2	6.28674	5.96881	6.57054	6.30665	6.59925	7.17763	6.64887	6.81121	6.28319	6.80924	1.08372	0.115998	0.0391974	0.0384395
sp|P53597|SUCA_HUMAN	SUCLG1	SUCA_HUMAN Succinyl-CoA ligase [ADP/GDP-forming] subunit alpha, mitochondrial	15	5.7701	5.82768	5.98133	6.27574	6.24733	6.12665	6.764	6.71404	5.96371	6.463	1.08372	0.115994	0.0379495	0.0499991
sp|P61201-2|CSN2_HUMAN	COPS2	CSN2_HUMAN Isoform 2 of COP9 signalosome complex subunit 2	25	5.7685	5.90181	5.9951	6.40649	6.33105	6.37612	6.66429	6.71558	6.01797	6.52176	1.08371	0.115983	0.0457291	0.0300812
sp|O43681|ASNA_HUMAN	ASNA1	ASNA_HUMAN ATPase ASNA1	17	6.08377	5.80591	5.88854	6.11198	6.29173	6.27554	6.71679	6.606	5.97255	6.47251	1.08371	0.115979	0.0249539	0.0344284
sp|P15927-3|RFA2_HUMAN	RPA2	RFA2_HUMAN Isoform 3 of Replication protein A 32 kDa subunit	8	6.33805	6.00801	5.87487	6.13533	6.68474	6.50815	6.56351	6.63808	6.08906	6.59862	1.08368	0.115944	0.0323748	0.0118657
sp|P31939|PUR9_HUMAN	ATIC	PUR9_HUMAN Bifunctional purine biosynthesis protein PURH	63	5.60902	5.70473	6.01186	6.43611	6.1573	6.13598	6.78408	6.67263	5.94043	6.4375	1.08368	0.115933	0.0626998	0.0526653
sp|Q9Y320|TMX2_HUMAN	TMX2	TMX2_HUMAN Thioredoxin-related transmembrane protein 2	13	5.68016	5.8099	6.31431	6.34629	6.19975	6.18424	6.91829	6.86547	6.03766	6.54194	1.08352	0.115727	0.0566909	0.0618629
sp|Q15262-2|PTPRK_HUMAN	PTPRK	PTPRK_HUMAN Isoform 2 of Receptor-type tyrosine-protein phosphatase kappa	12	5.83157	5.90166	6.35957	6.37742	6.33638	6.38347	6.84868	6.94441	6.11755	6.62824	1.08348	0.11567	0.0476107	0.0472017
sp|Q9H0B6|KLC2_HUMAN	KLC2	KLC2_HUMAN Kinesin light chain 2	20	5.73341	5.51528	6.16724	6.5896	6.06142	5.79133	7.00977	7.14613	6.00138	6.50216	1.08344	0.115625	0.079425	0.104002
sp|P62191|PRS4_HUMAN	PSMC1	PRS4_HUMAN 26S protease regulatory subunit 4	48	5.8287	5.80314	5.86885	6.31611	6.37232	6.03471	6.60003	6.79662	5.9542	6.45092	1.08342	0.115597	0.0407753	0.0507192
sp|Q14155-5|ARHG7_HUMAN	ARHGEF7	ARHG7_HUMAN Isoform 5 of Rho guanine nucleotide exchange factor 7	21	5.81732	5.63244	6.03623	6.29065	6.10285	6.2209	6.7372	6.69883	5.94416	6.43994	1.08341	0.115575	0.0477604	0.0504759
sp|Q9GZZ1|NAA50_HUMAN	NAA50	NAA50_HUMAN N-alpha-acetyltransferase 50	25	5.65827	5.70961	6.08053	6.24167	6.24433	6.28284	6.51999	6.6164	5.92252	6.41589	1.0833	0.115438	0.047954	0.0281959
sp|Q12931|TRAP1_HUMAN	TRAP1	TRAP1_HUMAN Heat shock protein 75 kDa, mitochondrial	75	5.85963	5.69068	6.05848	6.31691	6.21994	6.195	6.76332	6.74035	5.98142	6.47965	1.0833	0.115427	0.0450524	0.0485511
sp|O43414|ERI3_HUMAN	ERI3	ERI3_HUMAN ERI1 exoribonuclease 3	14	5.78596	5.61216	5.96083	6.45538	5.94045	6.18303	6.86554	6.80846	5.95358	6.44937	1.08328	0.1154	0.0610652	0.0711718
sp|Q86SF2|GALT7_HUMAN	GALNT7	GALT7_HUMAN N-acetylgalactosaminyltransferase 7	27	5.76058	5.94425	5.89115	6.31008	6.29586	6.49278	6.4325	6.67333	5.97652	6.47362	1.08318	0.115268	0.0393854	0.0241856
sp|Q9P2Y5|UVRAG_HUMAN	UVRAG	UVRAG_HUMAN UV radiation resistance-associated gene protein	2	5.51535	5.6251	5.88556	6.45924	5.42526	5.81994	7.31987	6.87291	5.87131	6.35949	1.08315	0.115229	0.0718035	0.139167
sp|Q96DC7-2|TMCO6_HUMAN	TMCO6	TMCO6_HUMAN Isoform 2 of Transmembrane and coiled-coil domain-containing protein 6	1	5.93601	6.2837	6.1367	6.78433	5.80705	5.7328	7.49268	8.19639	6.28519	6.80723	1.08306	0.115113	0.0575948	0.181002
sp|P82932|RT06_HUMAN	MRPS6	RT06_HUMAN 28S ribosomal protein S6, mitochondrial	5	5.89436	5.82431	6.20153	6.44183	6.37357	6.56821	7.32924	6.1123	6.09051	6.59583	1.08297	0.114992	0.0469296	0.0793537
sp|Q8IYL2|TRM44_HUMAN	TRMT44	TRM44_HUMAN Probable tRNA (uracil-O(2)-)-methyltransferase	2	6.00618	5.70379	6.75953	5.81848	6.59563	6.66821	6.71137	6.32409	6.07199	6.57483	1.08281	0.114782	0.0782283	0.026441
sp|Q8IUI8|CRLF3_HUMAN	CRLF3	CRLF3_HUMAN Cytokine receptor-like factor 3	5	6.17671	5.44087	5.94877	6.40106	6.10658	6.3701	6.50563	6.96817	5.99185	6.48762	1.08274	0.114687	0.0686133	0.055594
sp|P49589-3|SYCC_HUMAN	CARS	SYCC_HUMAN Isoform 3 of Cysteine--tRNA ligase, cytoplasmic	57	5.66777	5.65814	6.1086	6.48548	6.25824	5.9618	6.69617	6.98059	5.98	6.4742	1.08264	0.114557	0.0664092	0.0699284
sp|Q8N4P3|MESH1_HUMAN	HDDC3	MESH1_HUMAN Guanosine-3',5'-bis(diphosphate) 3'-pyrophosphohydrolase MESH1	2	5.72585	5.93797	6.71449	7.10748	6.8469	5.93623	6.91568	7.89206	6.37145	6.89772	1.0826	0.114498	0.101882	0.115862
sp|Q96PY6-3|NEK1_HUMAN	NEK1	NEK1_HUMAN Isoform 3 of Serine/threonine-protein kinase Nek1	4	5.57575	7.14614	6.16767	6.13973	6.26314	5.5528	6.62005	8.66027	6.25732	6.77407	1.08258	0.114476	0.104242	0.196842
sp|P09429|HMGB1_HUMAN	HMGB1	HMGB1_HUMAN High mobility group protein B1	35	5.95163	5.77333	5.69216	5.97981	6.1834	6.43118	5.82167	6.89245	5.84923	6.33218	1.08257	0.114454	0.023765	0.0710047
sp|Q12980|NPRL3_HUMAN	NPRL3	NPRL3_HUMAN Nitrogen permease regulator 3-like protein	2	6.68461	6.08403	6.02739	6.46831	5.9933	6.9652	7.27378	7.11627	6.31609	6.83714	1.0825	0.114362	0.0497471	0.0843179
sp|P49915|GUAA_HUMAN	GMPS	GUAA_HUMAN GMP synthase [glutamine-hydrolyzing]	51	5.61534	5.64098	6.06757	6.38896	5.88763	6.02294	6.90772	6.8507	5.92821	6.41725	1.08249	0.114357	0.0625197	0.0836474
sp|Q9BZF3-5|OSBL6_HUMAN	OSBPL6	OSBL6_HUMAN Isoform 5 of Oxysterol-binding protein-related protein 6	8	5.6739	5.73201	6.34109	6.72118	6.29415	6.61476	6.94738	6.62868	6.11705	6.62124	1.08243	0.114267	0.0822714	0.0402857
tr|E9PLY5|E9PLY5_HUMAN	MACF1	E9PLY5_HUMAN Microtubule-actin cross-linking factor 1, isoforms 1/2/3/5 (Fragment)	1	4.86774	6.9107	5.67573	6.29431	6.26276	5.23802	5.90239	8.29698	5.93712	6.42504	1.08218	0.113942	0.147072	0.205161
sp|Q96EP9|NTCP4_HUMAN	SLC10A4	NTCP4_HUMAN Sodium/bile acid cotransporter 4	1	8.00361	5.5173	6.1411	5.19292	6.46362	8.27837	5.8885	6.26639	6.21373	6.72422	1.08215	0.113907	0.202206	0.158118
sp|P61020|RAB5B_HUMAN	RAB5B	RAB5B_HUMAN Ras-related protein Rab-5B	5	5.59601	6.1519	5.6003	6.62935	6.4858	7.11506	6.40339	5.9423	5.99439	6.48664	1.08212	0.113858	0.0829651	0.0743693
sp|O75063|XYLK_HUMAN	FAM20B	XYLK_HUMAN Glycosaminoglycan xylosylkinase	6	5.93947	5.55112	6.42424	6.63574	6.1901	6.50451	6.8569	7.01503	6.13764	6.64163	1.08211	0.113854	0.0794586	0.0555564
sp|Q9H6E5|STPAP_HUMAN	TUT1	STPAP_HUMAN Speckle targeted PIP5K1A-regulated poly(A) polymerase	6	6.11842	5.65647	6.42465	6.62947	6.1776	6.33795	7.42609	6.9261	6.20725	6.71693	1.08211	0.113848	0.0681458	0.085141
sp|Q9BUI4|RPC3_HUMAN	POLR3C	RPC3_HUMAN DNA-directed RNA polymerase III subunit RPC3	14	5.83983	5.83315	6.32064	6.37445	6.48377	6.29769	6.53955	7.0433	6.09202	6.59108	1.08192	0.113594	0.0485696	0.0483566
sp|Q9BYB4|GNB1L_HUMAN	GNB1L	GNB1L_HUMAN Guanine nucleotide-binding protein subunit beta-like protein 1	9	5.78681	5.7596	6.36227	6.42278	6.30174	6.34763	6.68578	6.98853	6.08286	6.58092	1.08188	0.113538	0.0589507	0.0488077
sp|O15121|DEGS1_HUMAN	DEGS1	DEGS1_HUMAN Sphingolipid delta(4)-desaturase DES1	2	5.68684	5.93643	6.04901	6.18122	6.37109	5.91553	6.36783	7.15186	5.96338	6.45158	1.08187	0.113523	0.0351733	0.0796024
sp|Q9P016|THYN1_HUMAN	THYN1	THYN1_HUMAN Thymocyte nuclear protein 1	12	5.9497	6.05328	6.02507	6.42504	6.41222	6.51267	6.52274	7.00729	6.11327	6.61373	1.08186	0.113519	0.0347431	0.040382
sp|Q9BV94|EDEM2_HUMAN	EDEM2	EDEM2_HUMAN ER degradation-enhancing alpha-mannosidase-like protein 2	3	5.20406	5.44731	6.05019	6.46168	6.53092	5.68958	6.08458	6.75313	5.79081	6.26455	1.08181	0.113446	0.0986796	0.0755861
sp|Q70EL3|UBP50_HUMAN	USP50	UBP50_HUMAN Inactive ubiquitin carboxyl-terminal hydrolase 50	1	6.67607	5.83427	5.94891	6.24428	6.98514	6.20995	7.40667	6.12209	6.17588	6.68096	1.08178	0.113411	0.0608068	0.0928077
sp|Q9BY11|PACN1_HUMAN	PACSIN1	PACN1_HUMAN Protein kinase C and casein kinase substrate in neurons protein 1	4	5.67367	6.25603	6.13057	6.76875	6.35813	6.32995	7.10763	7.06317	6.20725	6.71472	1.08175	0.113372	0.0725405	0.0638245
sp|P52848|NDST1_HUMAN	NDST1	NDST1_HUMAN Bifunctional heparan sulfate N-deacetylase/N-sulfotransferase 1	9	5.7059	5.88924	6.35044	6.52088	6.54571	6.08639	6.81559	7.01614	6.11661	6.61596	1.08164	0.113216	0.0625041	0.0607975
sp|P22314|UBA1_HUMAN	UBA1	UBA1_HUMAN Ubiquitin-like modifier-activating enzyme 1	101	5.75469	5.76813	6.05651	6.45556	6.04761	6.06209	6.91172	6.97391	6.00872	6.49883	1.08157	0.113122	0.0547235	0.0789879
sp|Q9NUQ9|FA49B_HUMAN	FAM49B	FA49B_HUMAN Protein FAM49B	28	5.92811	6.00953	6.22866	6.23548	6.34848	6.39083	6.82817	6.82338	6.10044	6.59771	1.08151	0.113052	0.0255071	0.040001
sp|Q8WWH5|TRUB1_HUMAN	TRUB1	TRUB1_HUMAN Probable tRNA pseudouridine synthase 1	18	5.5681	5.77066	6.17276	6.29471	6.24731	6.1407	6.84014	6.51794	5.95156	6.43652	1.08149	0.113014	0.0570989	0.0485411
sp|Q9Y6X3|SCC4_HUMAN	MAU2	SCC4_HUMAN MAU2 chromatid cohesion factor homolog	5	5.69984	5.98006	6.35622	6.17836	6.20691	6.51948	6.72907	6.73139	6.05362	6.54671	1.08145	0.112973	0.0464983	0.0377845
sp|O75787|RENR_HUMAN	ATP6AP2	RENR_HUMAN Renin receptor	6	5.76277	5.60278	6.4037	6.44658	6.19749	6.18117	7.10803	6.70156	6.05396	6.54706	1.08145	0.112969	0.0716731	0.0680013
sp|Q9H977|WDR54_HUMAN	WDR54	WDR54_HUMAN WD repeat-containing protein 54	5	6.07279	5.71371	6.01047	6.07598	5.94363	5.95042	7.00285	6.91944	5.96824	6.45408	1.08141	0.112908	0.0288769	0.0908724
sp|Q8TDD5|MCLN3_HUMAN	MCOLN3	MCLN3_HUMAN Mucolipin-3	1	4.64759	6.56435	6.62144	5.82844	5.85361	6.88607	6.21788	6.62842	5.91545	6.39649	1.08132	0.112792	0.155382	0.0710769
sp|Q13416|ORC2_HUMAN	ORC2	ORC2_HUMAN Origin recognition complex subunit 2	4	5.85576	5.58608	6.24534	6.82255	6.35357	6.44464	6.57576	7.12883	6.12743	6.6257	1.08132	0.11279	0.0875805	0.0524619
sp|P51571|SSRD_HUMAN	SSR4	SSRD_HUMAN Translocon-associated protein subunit delta	8	5.60341	5.94831	6.04431	5.71773	6.46024	5.95697	6.18388	6.60792	5.82844	6.30225	1.08129	0.112758	0.0348626	0.0459537
sp|P61764|STXB1_HUMAN	STXBP1	STXB1_HUMAN Syntaxin-binding protein 1	12	5.78731	5.75637	6.48699	6.25646	6.69147	6.22655	6.79727	6.54558	6.07178	6.56522	1.08127	0.112723	0.0591466	0.0378114
sp|Q9H1N7|S35B3_HUMAN	SLC35B3	S35B3_HUMAN Adenosine 3'-phospho 5'-phosphosulfate transporter 2	3	5.34201	5.52659	6.77303	6.51438	6.49516	6.2433	6.74215	6.63589	6.039	6.52912	1.08116	0.112579	0.117602	0.0330423
sp|Q8IY81|SPB1_HUMAN	FTSJ3	SPB1_HUMAN pre-rRNA processing protein FTSJ3	7	6.21476	5.68909	6.41084	5.98828	6.44937	7.38972	6.41171	6.02441	6.07574	6.5688	1.08115	0.11257	0.0510638	0.0882966
sp|Q16576|RBBP7_HUMAN	RBBP7	RBBP7_HUMAN Histone-binding protein RBBP7	2	5.7714	6.145	6.51198	6.45679	6.4059	6.37339	6.63337	7.49085	6.22129	6.72588	1.08111	0.112508	0.0547598	0.0777493
sp|Q9P215|POGK_HUMAN	POGK	POGK_HUMAN Pogo transposable element with KRAB domain	5	5.71137	6.26084	6.18168	6.29491	6.14616	6.06282	6.83366	7.389	6.1122	6.60791	1.0811	0.112502	0.0444025	0.0945645
sp|Q8TEA7|TBCK_HUMAN	TBCK	TBCK_HUMAN TBC domain-containing protein kinase-like protein	6	5.78319	6.01589	6.30053	6.33656	5.79385	6.32213	7.03815	7.2618	6.10904	6.60398	1.08102	0.11239	0.0426111	0.10184
sp|Q96QE5|TEFM_HUMAN	TEFM	TEFM_HUMAN Transcription elongation factor, mitochondrial	5	6.13096	5.7278	6.33438	6.21328	6.16592	6.10309	7.14909	6.96488	6.10161	6.59574	1.08099	0.112347	0.0430764	0.0816418
sp|Q9NS87|KIF15_HUMAN	KIF15	KIF15_HUMAN Kinesin-like protein KIF15	34	5.70216	5.91827	6.36662	6.54919	6.44054	6.34108	6.69166	7.04979	6.13406	6.63077	1.08098	0.112334	0.0638034	0.0476427
sp|O75554|WBP4_HUMAN	WBP4	WBP4_HUMAN WW domain-binding protein 4	8	5.7318	6.4675	5.54447	5.57211	6.04313	7.51141	6.19956	5.44885	5.82897	6.30074	1.08093	0.11228	0.0743906	0.137998
sp|P43155|CACP_HUMAN	CRAT	CACP_HUMAN Carnitine O-acetyltransferase	8	5.59957	5.62461	6.50953	6.68237	5.93678	6.32924	7.30778	6.8181	6.10402	6.59798	1.08092	0.112264	0.0937888	0.0901622
sp|Q9H4P4|RNF41_HUMAN	RNF41	RNF41_HUMAN E3 ubiquitin-protein ligase NRDP1	2	6.24937	5.77731	6.58613	6.19159	6.12947	6.97707	7.16801	6.53687	6.2011	6.70286	1.08091	0.112252	0.0535061	0.0693311
sp|Q9NQW7-3|XPP1_HUMAN	XPNPEP1	XPP1_HUMAN Isoform 3 of Xaa-Pro aminopeptidase 1	40	5.92039	5.86204	6.09858	6.28242	6.41842	6.34807	6.72414	6.626	6.04086	6.52916	1.08083	0.112143	0.031434	0.0268869
sp|O60333-4|KIF1B_HUMAN	KIF1B	KIF1B_HUMAN Isoform 4 of Kinesin-like protein KIF1B	34	5.74342	5.97446	6.05408	6.39622	6.12142	6.3842	6.79041	6.82457	6.04204	6.53015	1.08078	0.112079	0.0447511	0.0517635
sp|Q8NAT1|PMGT2_HUMAN	POMGNT2	PMGT2_HUMAN Protein O-linked-mannose beta-1,4-N-acetylglucosaminyltransferase 2	4	5.94689	5.94991	5.66819	6.32092	6.45643	6.5575	6.37539	6.4244	5.97148	6.45343	1.08071	0.111978	0.0448478	0.0119268
sp|P49914|MTHFS_HUMAN	MTHFS	MTHFS_HUMAN 5-formyltetrahydrofolate cyclo-ligase	11	5.77425	5.94295	6.14598	6.1682	6.309	6.35248	6.48803	6.81887	6.00784	6.49209	1.0806	0.111837	0.0309274	0.0355519
sp|Q9NUX5|POTE1_HUMAN	POT1	POTE1_HUMAN Protection of telomeres protein 1	2	5.3528	5.71877	6.14658	6.52623	6.42545	6.22843	6.34628	6.65572	5.93609	6.41397	1.0805	0.111703	0.0859	0.0281188
sp|Q969G6|RIFK_HUMAN	RFK	RIFK_HUMAN Riboflavin kinase	7	5.50944	5.87683	6.15185	6.08323	6.03771	6.35429	6.74876	6.38105	5.90534	6.38045	1.08046	0.111639	0.04888	0.0455869
sp|Q9Y5N6|ORC6_HUMAN	ORC6	ORC6_HUMAN Origin recognition complex subunit 6	4	6.00822	5.76199	6.11589	6.70693	6.42744	6.26274	6.62304	7.25616	6.14826	6.64235	1.08036	0.111515	0.0651928	0.0654745
sp|Q96RL7|VP13A_HUMAN	VPS13A	VP13A_HUMAN Vacuolar protein sorting-associated protein 13A	7	5.87731	5.8906	6.38973	6.32749	6.56013	6.03339	6.69975	7.15784	6.12128	6.61278	1.08029	0.111422	0.0449695	0.0700166
sp|P56282|DPOE2_HUMAN	POLE2	DPOE2_HUMAN DNA polymerase epsilon subunit 2	7	5.93389	5.60773	5.96163	6.21108	6.21402	5.94886	6.6523	6.80145	5.92858	6.40416	1.08022	0.111322	0.0417586	0.0613344
sp|Q15022|SUZ12_HUMAN	SUZ12	SUZ12_HUMAN Polycomb protein SUZ12	9	5.67024	5.87802	6.36179	6.28603	6.2456	6.45331	6.9884	6.44838	6.04902	6.53392	1.08016	0.111248	0.0545555	0.048679
sp|Q8N3Y3|LARG2_HUMAN	GYLTL1B	LARG2_HUMAN Glycosyltransferase-like protein LARGE2	6	6.08787	5.94076	6.27611	6.28564	6.78952	6.29667	6.79284	6.68055	6.14759	6.6399	1.08008	0.111138	0.02688	0.0353452
sp|Q9UDR5|AASS_HUMAN	AASS	AASS_HUMAN Alpha-aminoadipic semialdehyde synthase, mitochondrial	3	4.69728	6.09688	6.81833	6.31089	6.85543	6.84477	5.74809	6.38843	5.98085	6.45918	1.07998	0.111002	0.151754	0.0807606
sp|O43865|SAHH2_HUMAN	AHCYL1	SAHH2_HUMAN Putative adenosylhomocysteinase 2	12	5.50663	5.70316	6.05986	6.47188	5.9088	5.99937	6.89048	6.8416	5.93538	6.41006	1.07997	0.110997	0.071552	0.0824003
sp|Q86VN1|VPS36_HUMAN	VPS36	VPS36_HUMAN Vacuolar protein-sorting-associated protein 36	15	5.66754	5.94117	6.2212	6.58369	6.18674	6.56333	7.04747	6.56838	6.1034	6.59148	1.07997	0.110989	0.0642165	0.0534995
sp|Q96A72|MGN2_HUMAN	MAGOHB	MGN2_HUMAN Protein mago nashi homolog 2	9	5.66462	5.8074	6.48213	6.48281	6.24286	6.04337	6.86312	7.24138	6.10924	6.59768	1.07995	0.110966	0.0711861	0.0838419
sp|P78540|ARGI2_HUMAN	ARG2	ARGI2_HUMAN Arginase-2, mitochondrial	5	5.65348	5.62426	6.2114	6.56045	6.43419	6.34588	6.44875	6.74158	6.0124	6.4926	1.07987	0.110856	0.075577	0.0265067
sp|O95834-3|EMAL2_HUMAN	EML2	EMAL2_HUMAN Isoform 3 of Echinoderm microtubule-associated protein-like 2	17	5.87917	5.77229	6.18879	6.40169	6.37903	6.24006	6.73077	6.82789	6.06048	6.54444	1.07985	0.110836	0.0475193	0.0427726
sp|O60216|RAD21_HUMAN	RAD21	RAD21_HUMAN Double-strand-break repair protein rad21 homolog	22	5.97407	5.99416	6.20396	6.19622	6.38339	6.58155	6.65837	6.6904	6.0921	6.57843	1.07983	0.110803	0.0205188	0.0209494
sp|Q9H0V9-2|LMA2L_HUMAN	LMAN2L	LMA2L_HUMAN Isoform 2 of VIP36-like protein	6	5.64157	5.57965	6.40548	6.6038	6.23787	6.36672	6.84701	6.71292	6.05762	6.54113	1.07982	0.110788	0.0863525	0.0437297
sp|Q9UBP6|TRMB_HUMAN	METTL1	TRMB_HUMAN tRNA (guanine-N(7)-)-methyltransferase	9	5.99134	5.96631	6.24771	6.31041	6.72492	6.31762	6.4265	7.0014	6.12894	6.61761	1.07973	0.110672	0.0286376	0.0466026
sp|Q8N9B5|JMY_HUMAN	JMY	JMY_HUMAN Junction-mediating and -regulatory protein	2	6.02495	5.55839	6.39869	6.30178	6.3982	6.2846	6.66356	6.87196	6.07095	6.55458	1.07966	0.11058	0.0620365	0.0403602
sp|O43402|EMC8_HUMAN	EMC8	EMC8_HUMAN ER membrane protein complex subunit 8	7	6.11	5.60565	6.19475	6.3826	6.39376	6.14513	6.9335	6.75524	6.07325	6.55691	1.07964	0.110547	0.0546484	0.0540884
sp|Q9UHY7|ENOPH_HUMAN	ENOPH1	ENOPH_HUMAN Enolase-phosphatase E1	15	5.68916	5.98626	6.18684	6.45881	6.24164	6.44049	6.73267	6.84278	6.08027	6.5644	1.07962	0.110527	0.0534161	0.0417505
sp|P05114|HMGN1_HUMAN	HMGN1	HMGN1_HUMAN Non-histone chromosomal protein HMG-14	2	6.07998	6.00085	5.85573	5.81063	6.22439	7.17913	6.11402	6.12021	5.9368	6.40944	1.07961	0.110513	0.0211043	0.0804471
sp|Q4G176|ACSF3_HUMAN	ACSF3	ACSF3_HUMAN Acyl-CoA synthetase family member 3, mitochondrial	11	5.60492	5.74017	6.19792	6.14544	6.38672	6.1546	6.48757	6.54271	5.92211	6.3929	1.0795	0.110359	0.049678	0.0268257
sp|Q9P0I2|EMC3_HUMAN	EMC3	EMC3_HUMAN ER membrane protein complex subunit 3	3	5.37058	6.12981	6.45215	6.49956	5.94617	6.58613	6.5995	7.26341	6.11302	6.5988	1.07947	0.110318	0.0853115	0.0815047
sp|Q9H488|OFUT1_HUMAN	POFUT1	OFUT1_HUMAN GDP-fucose protein O-fucosyltransferase 1	11	5.76676	5.76561	5.93633	6.27122	6.31956	6.56326	6.11811	6.62424	5.93498	6.40629	1.07941	0.110247	0.0401144	0.0363531
sp|P38935|SMBP2_HUMAN	IGHMBP2	SMBP2_HUMAN DNA-binding protein SMUBP-2	2	5.0347	6.33934	6.3929	5.84419	6.1236	6.34664	6.72264	6.29052	5.90278	6.37085	1.0793	0.110091	0.106599	0.0397019
sp|Q9Y265|RUVB1_HUMAN	RUVBL1	RUVB1_HUMAN RuvB-like 1	53	5.7276	5.74376	6.14534	6.39584	6.25711	6.25157	6.67123	6.73645	6.00314	6.47909	1.07928	0.110075	0.0542032	0.0402666
sp|Q16222|UAP1_HUMAN	UAP1	UAP1_HUMAN UDP-N-acetylhexosamine pyrophosphorylase	22	5.69734	5.58106	6.1752	6.27956	6.04018	5.94243	6.62656	7.00409	5.93329	6.40331	1.07922	0.109987	0.0582349	0.078347
sp|O95139|NDUB6_HUMAN	NDUFB6	NDUB6_HUMAN NADH dehydrogenase [ubiquinone] 1 beta subcomplex subunit 6	8	5.94521	5.83453	6.14656	6.37861	6.16742	6.30092	6.82277	6.93902	6.07623	6.55753	1.07921	0.109977	0.0394027	0.0579969
sp|Q9H3R5|CENPH_HUMAN	CENPH	CENPH_HUMAN Centromere protein H	3	6.31617	6.32377	5.82028	6.35758	6.56497	6.67068	6.91887	6.62875	6.20445	6.69582	1.0792	0.109957	0.0413808	0.0231373
sp|O00468|AGRIN_HUMAN	AGRN	AGRIN_HUMAN Agrin	7	5.77792	5.63608	5.99827	6.56043	6.34781	6.60076	6.46617	6.45595	5.99317	6.46767	1.07917	0.109926	0.0678223	0.0160231
sp|P47755|CAZA2_HUMAN	CAPZA2	CAZA2_HUMAN F-actin-capping protein subunit alpha-2	17	5.61577	5.83707	5.94063	6.29879	6.3348	6.32683	6.54438	6.36198	5.92307	6.392	1.07917	0.109923	0.0480803	0.0160664
sp|P08574|CY1_HUMAN	CYC1	CY1_HUMAN Cytochrome c1, heme protein, mitochondrial	20	5.77245	5.7269	6.31758	6.23086	6.2653	6.24735	6.67731	6.75858	6.01195	6.48714	1.07904	0.109749	0.0508113	0.0414164
sp|O60942|MCE1_HUMAN	RNGTT	MCE1_HUMAN mRNA-capping enzyme	10	5.93154	5.6919	6.60391	5.79605	6.14523	6.4415	6.94262	6.3925	6.00585	6.48046	1.07903	0.109728	0.0683668	0.0515825
sp|Q2VPK5|CTU2_HUMAN	CTU2	CTU2_HUMAN Cytoplasmic tRNA 2-thiolation protein 2	17	5.72244	5.89854	6.11131	6.25114	6.17715	6.20842	6.79273	6.69925	5.99586	6.46939	1.07898	0.109663	0.0388434	0.0497602
sp|Q8NBZ7-2|UXS1_HUMAN	UXS1	UXS1_HUMAN Isoform 2 of UDP-glucuronic acid decarboxylase 1	2	5.3569	5.90575	6.19781	6.46047	6.46398	6.53259	6.29092	6.52162	5.98023	6.45228	1.07893	0.109607	0.0791453	0.0173119
sp|Q16774-3|KGUA_HUMAN	GUK1	KGUA_HUMAN Isoform 3 of Guanylate kinase	4	5.50169	5.44326	6.23766	6.96032	6.21316	6.16614	6.62343	7.04521	6.03573	6.51199	1.07891	0.109569	0.118391	0.0630453
sp|P55011|S12A2_HUMAN	SLC12A2	S12A2_HUMAN Solute carrier family 12 member 2	33	5.72301	5.87966	6.05867	6.31785	6.23261	6.61164	6.62249	6.40439	5.9948	6.46778	1.0789	0.10956	0.0425906	0.0287809
sp|O00255|MEN1_HUMAN	MEN1	MEN1_HUMAN Menin	3	6.21833	5.70352	5.93595	6.32762	5.71654	6.32454	6.76466	7.28743	6.04635	6.52329	1.07888	0.109535	0.0466239	0.102167
sp|Q8WWV3|RT4I1_HUMAN	RTN4IP1	RT4I1_HUMAN Reticulon-4-interacting protein 1, mitochondrial	14	5.89671	5.59949	6.15912	6.57775	6.42908	6.18995	6.91081	6.61401	6.05827	6.53596	1.07885	0.109494	0.0684972	0.046554
sp|Q8TF46|DI3L1_HUMAN	DIS3L	DI3L1_HUMAN DIS3-like exonuclease 1	6	5.43728	5.79887	6.11413	6.93904	5.94093	6.66369	6.72464	6.87513	6.07233	6.5511	1.07884	0.109486	0.105491	0.0635575
sp|Q8IY31-2|IFT20_HUMAN	IFT20	IFT20_HUMAN Isoform 2 of Intraflagellar transport protein 20 homolog	3	6.08027	6.04229	5.84273	6.29682	6.70676	6.3689	6.75716	6.3417	6.06553	6.54363	1.07882	0.109458	0.0306805	0.0334246
sp|P07355-2|ANXA2_HUMAN	ANXA2	ANXA2_HUMAN Isoform 2 of Annexin A2	31	5.92065	5.67894	6.06072	6.47427	6.42837	6.20296	6.60506	6.80048	6.03364	6.50922	1.07882	0.109454	0.0552568	0.0391023
sp|Q15742|NAB2_HUMAN	NAB2	NAB2_HUMAN NGFI-A-binding protein 2	13	5.51522	5.77431	6.17	6.46204	6.09472	5.96593	6.78394	6.96138	5.98039	6.45149	1.07877	0.109393	0.0700695	0.0766475
sp|Q9NQ86|TRI36_HUMAN	TRIM36	TRI36_HUMAN E3 ubiquitin-protein ligase TRIM36	2	6.09909	6.2931	6.24978	6.50515	6.31933	6.92474	6.84267	7.03826	6.28678	6.78125	1.07865	0.10923	0.0266674	0.046926
sp|Q9NPA0|EMC7_HUMAN	EMC7	EMC7_HUMAN ER membrane protein complex subunit 7	9	5.79426	5.63939	6.22995	6.5656	6.56759	6.30072	6.52714	6.73943	6.0573	6.53372	1.07865	0.10923	0.069522	0.0276337
sp|Q15370|ELOB_HUMAN	TCEB2	ELOB_HUMAN Transcription elongation factor B polypeptide 2	20	6.28232	6.17465	5.53022	5.86347	6.10021	6.22903	6.14238	7.25281	5.96266	6.43111	1.07856	0.10911	0.056788	0.0855871
sp|Q99986|VRK1_HUMAN	VRK1	VRK1_HUMAN Serine/threonine-protein kinase VRK1	12	6.05747	5.59274	6.39832	6.26789	6.18471	6.64244	6.89645	6.5022	6.07911	6.55645	1.07852	0.109056	0.0581244	0.0452562
sp|O15460|P4HA2_HUMAN	P4HA2	P4HA2_HUMAN Prolyl 4-hydroxylase subunit alpha-2	14	5.74476	5.93686	6.17729	6.45026	6.23882	6.21964	6.8396	6.91932	6.07729	6.55434	1.0785	0.109023	0.0502163	0.0575038
sp|P52565|GDIR1_HUMAN	ARHGDIA	GDIR1_HUMAN Rho GDP-dissociation inhibitor 1	30	6.15718	5.86837	5.96662	5.86531	6.27221	6.13036	6.32641	7.00078	5.96437	6.43244	1.07848	0.108996	0.0229499	0.060289
sp|Q9NVQ4-2|FAIM1_HUMAN	FAIM	FAIM1_HUMAN Isoform 2 of Fas apoptotic inhibitory molecule 1	3	5.43975	5.97283	5.64528	6.48921	6.07354	6.13702	6.33471	6.84795	5.88677	6.34831	1.0784	0.108896	0.0777517	0.0553176
sp|Q9H9J4|UBP42_HUMAN	USP42	UBP42_HUMAN Ubiquitin carboxyl-terminal hydrolase 42	2	4.8358	5.31009	7.06144	6.36846	6.68574	6.54841	6.39824	5.79141	5.89395	6.35595	1.07839	0.108874	0.171039	0.0620283
sp|O94826|TOM70_HUMAN	TOMM70A	TOM70_HUMAN Mitochondrial import receptor subunit TOM70	39	6.02211	5.87397	5.85646	6.32191	6.40668	6.13753	6.5949	6.82153	6.01861	6.49016	1.07835	0.108823	0.0357922	0.0446647
sp|Q96DU7|IP3KC_HUMAN	ITPKC	IP3KC_HUMAN Inositol-trisphosphate 3-kinase C	1	5.22993	4.99744	6.54433	8.14932	5.26793	7.19673	7.66058	6.74772	6.23026	6.71824	1.07833	0.108792	0.232633	0.154239
sp|P49755|TMEDA_HUMAN	TMED10	TMEDA_HUMAN Transmembrane emp24 domain-containing protein 10	16	5.78797	6.0182	5.67477	6.06422	6.18924	6.1386	6.53652	6.52477	5.88629	6.34728	1.07832	0.10878	0.0315499	0.0335245
sp|Q9H9S5|FKRP_HUMAN	FKRP	FKRP_HUMAN Fukutin-related protein	3	5.51046	5.49842	6.69595	6.00979	6.56655	7.03073	5.61859	6.35399	5.92866	6.39247	1.07823	0.108668	0.0951823	0.0920196
sp|Q9BZQ8|NIBAN_HUMAN	FAM129A	NIBAN_HUMAN Protein Niban	5	6.08614	5.61793	6.14663	6.44168	6.34454	6.00091	7.11619	6.73081	6.0731	6.54811	1.07822	0.108647	0.0561304	0.0736085
sp|Q96AP4|ZUFSP_HUMAN	ZUFSP	ZUFSP_HUMAN Zinc finger with UFM1-specific peptidase domain protein	1	5.8635	5.65471	5.83551	6.98035	5.94683	6.65726	7.50329	6.12789	6.08352	6.55882	1.07813	0.10853	0.0994502	0.106434
sp|Q96H79|ZCCHL_HUMAN	ZC3HAV1L	ZCCHL_HUMAN Zinc finger CCCH-type antiviral protein 1-like	5	5.32862	5.96925	6.0337	6.19729	5.56124	6.87608	6.78156	6.14775	5.88221	6.34166	1.07811	0.1085	0.0648295	0.0965966
sp|Q5JWF2|GNAS1_HUMAN	GNAS	GNAS1_HUMAN Guanine nucleotide-binding protein G(s) subunit alpha isoforms XLas	14	5.89091	5.73036	6.32831	6.11165	6.36121	6.06832	6.8578	6.6496	6.01531	6.48423	1.07796	0.108297	0.0433425	0.0530524
sp|P21579|SYT1_HUMAN	SYT1	SYT1_HUMAN Synaptotagmin-1	16	6.04334	5.85939	6.08489	6.04055	6.66868	6.33544	6.38221	6.51204	6.00704	6.47459	1.07783	0.108135	0.0167306	0.0230764
sp|Q53GT1|KLH22_HUMAN	KLHL22	KLH22_HUMAN Kelch-like protein 22	3	5.9257	5.29138	5.85234	6.72648	6.5463	6.03243	6.58413	6.48509	5.94897	6.41199	1.07783	0.10813	0.0992966	0.0399732
sp|P61129|ZC3H6_HUMAN	ZC3H6	ZC3H6_HUMAN Zinc finger CCCH domain-containing protein 6	1	6.0679	6.088	6.52351	6.29364	6.03111	6.81791	6.32619	7.74129	6.24326	6.72912	1.07782	0.108119	0.0340952	0.111272
sp|Q00266|METK1_HUMAN	MAT1A	METK1_HUMAN S-adenosylmethionine synthase isoform type-1	14	6.0938	6.09664	5.97747	6.22053	6.43577	6.68064	6.58525	6.58451	6.09711	6.57154	1.07781	0.108106	0.0162798	0.0153918
sp|Q7Z6M2|FBX33_HUMAN	FBXO33	FBX33_HUMAN F-box only protein 33	2	5.79247	5.04956	6.38411	6.62292	6.57946	7.07342	6.39635	5.65175	5.96227	6.42525	1.07765	0.107891	0.117656	0.09177
sp|Q5PSV4|BRM1L_HUMAN	BRMS1L	BRM1L_HUMAN Breast cancer metastasis-suppressor 1-like protein	1	5.6942	6.01615	6.01645	6.78497	7.16439	6.21	7.26428	5.77627	6.12794	6.60374	1.07764	0.107879	0.0756517	0.110255
sp|Q8WXA9-2|SREK1_HUMAN	SREK1	SREK1_HUMAN Isoform 2 of Splicing regulatory glutamine/lysine-rich protein 1	9	5.91786	5.83568	5.95791	6.21618	6.22982	6.89139	6.25929	6.40453	5.98191	6.44626	1.07763	0.107856	0.0274595	0.0475351
sp|Q13177|PAK2_HUMAN	PAK2	PAK2_HUMAN Serine/threonine-protein kinase PAK 2	40	5.92014	5.84174	6.09273	6.08702	6.34439	6.23695	6.60404	6.61241	5.98541	6.44945	1.07753	0.107726	0.0208548	0.0292343
sp|Q9GZN1|ARP6_HUMAN	ACTR6	ARP6_HUMAN Actin-related protein 6	7	6.06529	5.81015	6.12904	6.49035	6.34325	6.27221	7.00698	6.77094	6.12371	6.59835	1.07751	0.107699	0.0458197	0.0530948
sp|P13611|CSPG2_HUMAN	VCAN	CSPG2_HUMAN Versican core protein	5	6.29355	6.10011	5.78695	6.37403	6.61297	6.91582	6.32978	6.59906	6.13866	6.61441	1.0775	0.107688	0.0425396	0.0362109
sp|Q8N6T7|SIR6_HUMAN	SIRT6	SIR6_HUMAN NAD-dependent protein deacetylase sirtuin-6	6	5.0664	5.86301	6.65378	6.72095	5.96302	5.96621	7.06015	7.19637	6.07604	6.54644	1.07742	0.10758	0.127994	0.102977
sp|P03886|NU1M_HUMAN	MT-ND1	NU1M_HUMAN NADH-ubiquinone oxidoreductase chain 1	2	6.213	6.10929	5.78471	6.54502	5.35409	7.05583	6.71739	7.43272	6.16301	6.64001	1.0774	0.107551	0.0508319	0.1364
sp|Q9H8M2|BRD9_HUMAN	BRD9	BRD9_HUMAN Bromodomain-containing protein 9	2	5.57431	5.42256	6.29501	6.21666	6.44628	6.26731	6.54905	6.06445	5.87713	6.33177	1.07736	0.107496	0.0753443	0.033619
sp|Q92558|WASF1_HUMAN	WASF1	WASF1_HUMAN Wiskott-Aldrich syndrome protein family member 1	6	5.82725	5.73623	6.25939	6.38772	6.50729	6.37838	6.57905	6.6186	6.05265	6.52083	1.07735	0.107489	0.0527609	0.0161869
sp|Q96PM9|Z385A_HUMAN	ZNF385A	Z385A_HUMAN Zinc finger protein 385A	4	6.08457	5.59915	6.12081	6.24337	6.49413	6.55062	6.48577	6.37612	6.01197	6.47666	1.07729	0.107411	0.0471526	0.011264
sp|Q7Z3K6-2|MIER3_HUMAN	MIER3	MIER3_HUMAN Isoform 2 of Mesoderm induction early response protein 3	2	6.10432	5.56759	6.31839	6.74049	6.10758	6.36393	7.26553	6.90518	6.1827	6.66056	1.07729	0.107406	0.0789086	0.0784749
sp|Q9P0M9|RM27_HUMAN	MRPL27	RM27_HUMAN 39S ribosomal protein L27, mitochondrial	7	5.99083	5.83655	5.96907	6.32666	6.51879	6.28932	6.73499	6.44225	6.03078	6.49634	1.0772	0.107283	0.0346068	0.0285559
sp|Q8WXI4|ACO11_HUMAN	ACOT11	ACO11_HUMAN Acyl-coenzyme A thioesterase 11	7	5.94348	5.39436	5.7753	6.13654	5.87366	5.44376	6.27302	7.45405	5.81242	6.26112	1.0772	0.107282	0.0542587	0.138054
sp|Q6ZTU2-6|E400N_HUMAN	EP400NL	E400N_HUMAN Isoform 5 of EP400 N-terminal-like protein	4	5.92968	6.00533	6.10074	5.93328	6.25266	6.74748	6.30975	6.50628	5.99226	6.45404	1.07706	0.107103	0.0133969	0.0346702
sp|P00387-3|NB5R3_HUMAN	CYB5R3	NB5R3_HUMAN Isoform 3 of NADH-cytochrome b5 reductase 3	25	5.87381	5.97461	6.11681	6.24009	6.3736	6.32788	6.777	6.59125	6.05133	6.51743	1.07702	0.107051	0.0265294	0.0318714
sp|Q9H173|SIL1_HUMAN	SIL1	SIL1_HUMAN Nucleotide exchange factor SIL1	4	5.6767	5.77669	7.11404	6.27755	6.77817	6.21982	7.05569	6.70246	6.21124	6.68904	1.07692	0.106916	0.105738	0.0519833
sp|Q8TCC3-2|RM30_HUMAN	MRPL30	RM30_HUMAN Isoform 2 of 39S ribosomal protein L30, mitochondrial	3	6.12325	5.85683	5.67051	6.2581	6.43839	6.062	6.35823	6.88911	5.97717	6.43693	1.07692	0.10691	0.0441358	0.0531569
sp|Q96HE7|ERO1A_HUMAN	ERO1L	ERO1A_HUMAN ERO1-like protein alpha	37	5.77779	5.83238	6.01066	6.37192	6.26209	6.18728	6.64208	6.74639	5.99819	6.45946	1.0769	0.106887	0.0447244	0.0427456
sp|P82650|RT22_HUMAN	MRPS22	RT22_HUMAN 28S ribosomal protein S22, mitochondrial	23	6.00255	5.65752	6.04395	6.38935	6.25794	6.1678	6.83859	6.68031	6.02334	6.48616	1.07684	0.1068	0.0496811	0.0499851
sp|Q16850|CP51A_HUMAN	CYP51A1	CP51A_HUMAN Lanosterol 14-alpha demethylase	16	5.73803	5.45873	6.15486	6.68094	5.77493	5.99175	7.0022	7.10966	6.00814	6.46964	1.07681	0.106766	0.0885426	0.10575
sp|O94830|DDHD2_HUMAN	DDHD2	DDHD2_HUMAN Phospholipase DDHD2	5	6.16892	5.85939	6.63004	6.22032	6.52177	6.22884	7.05479	6.98289	6.21967	6.69707	1.07676	0.106693	0.0509093	0.0584463
sp|O60890|OPHN1_HUMAN	OPHN1	OPHN1_HUMAN Oligophrenin-1	2	6.41178	5.86309	6.26155	5.68377	6.91534	5.43208	6.78775	6.94351	6.05505	6.51967	1.07673	0.106661	0.0559728	0.111696
sp|Q3V6T2|GRDN_HUMAN	CCDC88A	GRDN_HUMAN Girdin	2	6.14801	5.39549	6.95316	6.22315	7.05413	7.05575	6.68302	5.82174	6.17995	6.65366	1.07665	0.106552	0.103025	0.0874204
sp|Q70IA6-3|MOB2_HUMAN	MOB2	MOB2_HUMAN Isoform 3 of MOB kinase activator 2	3	5.85985	5.71277	6.28372	6.66632	6.04207	6.2183	7.0035	7.13705	6.13066	6.60023	1.07659	0.106473	0.0703683	0.0833633
sp|Q9NRG4|SMYD2_HUMAN	SMYD2	SMYD2_HUMAN N-lysine methyltransferase SMYD2	4	5.61811	5.39909	6.65776	5.81897	6.10945	5.99024	6.64448	6.5485	5.87348	6.32317	1.07656	0.106431	0.0936838	0.0508813
sp|Q9BT78|CSN4_HUMAN	COPS4	CSN4_HUMAN COP9 signalosome complex subunit 4	30	5.91457	5.83253	6.0812	6.28052	6.23327	6.17582	6.78341	6.76096	6.0272	6.48836	1.07651	0.106366	0.032859	0.0506588
sp|Q92614|MY18A_HUMAN	MYO18A	MY18A_HUMAN Unconventional myosin-XVIIIa	27	5.62471	5.77092	6.36496	6.45814	6.25741	6.17073	6.6908	6.95188	6.05468	6.5177	1.07647	0.106313	0.0690556	0.0564854
sp|Q6ZRK6|CCD73_HUMAN	CCDC73	CCD73_HUMAN Coiled-coil domain-containing protein 73	1	5.75106	6.17962	6.65691	6.37537	6.70092	7.07623	6.4482	6.64624	6.24074	6.7179	1.07646	0.106293	0.0610057	0.0390599
sp|P48449|ERG7_HUMAN	LSS	ERG7_HUMAN Lanosterol synthase	18	5.69219	5.7822	6.27452	6.43105	6.08246	6.26239	6.68888	6.99492	6.04499	6.50716	1.07646	0.106289	0.0600456	0.063438
sp|O96018|APBA3_HUMAN	APBA3	APBA3_HUMAN Amyloid beta A4 precursor protein-binding family A member 3	3	5.99812	7.62791	5.67792	6.6444	6.2024	7.58262	6.4605	7.6855	6.48709	6.98276	1.07641	0.106225	0.132609	0.108921
sp|Q13200|PSMD2_HUMAN	PSMD2	PSMD2_HUMAN 26S proteasome non-ATPase regulatory subunit 2	63	6.01441	5.84732	6.1101	6.19169	6.40451	6.31218	6.65566	6.63623	6.04088	6.50215	1.07636	0.106157	0.0244977	0.0262152
sp|Q96EU6|RRP36_HUMAN	RRP36	RRP36_HUMAN Ribosomal RNA processing protein 36 homolog	2	6.27679	6.54305	5.95557	5.8891	6.62066	6.59985	6.63341	6.69322	6.16613	6.63679	1.07633	0.10612	0.0491366	0.00603988
sp|O94766|B3GA3_HUMAN	B3GAT3	B3GA3_HUMAN Galactosylgalactosylxylosylprotein 3-beta-glucuronosyltransferase 3	7	5.77772	5.85283	6.22899	6.39553	6.47496	6.39465	6.42577	6.81037	6.06377	6.52644	1.0763	0.106081	0.048892	0.0294424
sp|P51808|DYLT3_HUMAN	DYNLT3	DYLT3_HUMAN Dynein light chain Tctex-type 3	1	5.6217	5.98527	6.18511	5.86509	5.93381	7.0059	6.67337	5.84532	5.91429	6.3646	1.07614	0.105864	0.0398224	0.0889649
sp|Q6RW13|ATRAP_HUMAN	AGTRAP	ATRAP_HUMAN Type-1 angiotensin II receptor-associated protein	2	5.73914	6.7271	6.67018	6.37258	6.8611	6.59358	6.63265	7.36344	6.37725	6.86269	1.07612	0.10584	0.0710212	0.0515931
sp|Q5SY16|NOL9_HUMAN	NOL9	NOL9_HUMAN Polynucleotide 5'-hydroxyl-kinase NOL9	5	5.9427	5.75421	6.58758	6.30337	6.71753	6.52032	6.48796	6.73185	6.14696	6.61441	1.07605	0.105739	0.0604763	0.0193746
sp|Q9UHB4-2|NDOR1_HUMAN	NDOR1	NDOR1_HUMAN Isoform 2 of NADPH-dependent diflavin oxidoreductase 1	3	5.15887	6.19578	6.53153	7.03482	6.12529	6.97474	6.83591	6.87956	6.23025	6.70388	1.07602	0.105705	0.127302	0.0581834
sp|O00213|APBB1_HUMAN	APBB1	APBB1_HUMAN Amyloid beta A4 precursor protein-binding family B member 1	3	5.2884	6.05079	5.94747	5.78626	5.8854	5.81745	6.98546	6.13728	5.76823	6.2064	1.07596	0.105627	0.0585795	0.08657
sp|Q6PCE3|PGM2L_HUMAN	PGM2L1	PGM2L_HUMAN Glucose 1,6-bisphosphate synthase	17	5.84109	5.74127	6.08237	6.40428	6.28385	6.02768	6.64382	6.94164	6.01725	6.47425	1.07595	0.105608	0.0490403	0.0619686
sp|Q9HAB8|PPCS_HUMAN	PPCS	PPCS_HUMAN Phosphopantothenate--cysteine ligase	10	5.78651	5.94998	5.90027	6.35007	6.33125	5.9957	6.76029	6.72114	5.99671	6.45209	1.07594	0.105597	0.0409075	0.0559012
sp|O43395|PRPF3_HUMAN	PRPF3	PRPF3_HUMAN U4/U6 small nuclear ribonucleoprotein Prp3	16	6.19508	5.89376	5.73554	6.12081	6.49207	6.37051	6.33301	6.56785	5.9863	6.44086	1.07593	0.105589	0.0351895	0.0168487
sp|Q16877|F264_HUMAN	PFKFB4	F264_HUMAN 6-phosphofructo-2-kinase/fructose-2,6-bisphosphatase 4	4	6.18292	5.51005	5.93797	6.31172	6.0832	6.02851	6.79209	6.85562	5.98567	6.43985	1.07588	0.105517	0.0589647	0.069058
sp|Q6ZN18|AEBP2_HUMAN	AEBP2	AEBP2_HUMAN Zinc finger protein AEBP2	5	5.68901	5.91894	6.14039	6.77455	6.66577	6.78592	6.3442	6.5876	6.13072	6.59587	1.07587	0.105506	0.0761913	0.028284
sp|Q9NRY5|F1142_HUMAN	FAM114A2	F1142_HUMAN Protein FAM114A2	11	6.24909	6.14285	6.09989	6.23246	6.46302	6.43652	6.88978	6.80813	6.18107	6.64936	1.07576	0.105359	0.0115607	0.0350588
sp|Q8NG68|TTL_HUMAN	TTL	TTL_HUMAN Tubulin--tyrosine ligase	4	5.59147	5.4413	6.5136	6.58021	6.23251	5.95454	6.79311	6.97112	6.03165	6.48782	1.07563	0.105182	0.0992663	0.0731858
sp|P40227|TCPZ_HUMAN	CCT6A	TCPZ_HUMAN T-complex protein 1 subunit zeta	86	5.96049	5.86647	6.12903	6.33192	6.36682	6.27927	6.76362	6.7128	6.07198	6.53063	1.07554	0.105055	0.033683	0.0372449
sp|P14324|FPPS_HUMAN	FDPS	FPPS_HUMAN Farnesyl pyrophosphate synthase	14	5.52713	5.50009	6.15015	6.62191	5.81278	5.71384	6.97854	7.09171	5.94982	6.39922	1.07553	0.105049	0.0906532	0.115146
sp|Q8TEA8|DTD1_HUMAN	DTD1	DTD1_HUMAN D-tyrosyl-tRNA(Tyr) deacylase 1	5	6.1364	6.15769	5.99279	6.24144	6.22746	7.07834	6.77828	6.29619	6.13208	6.59507	1.0755	0.105011	0.0168519	0.0613788
sp|Q9NUP7|TRM13_HUMAN	TRMT13	TRM13_HUMAN tRNA:m(4)X modification enzyme TRM13 homolog	5	5.63573	5.5441	6.7792	6.7431	6.24492	6.31746	6.95484	7.04899	6.17553	6.64155	1.07546	0.104957	0.109692	0.0630772
sp|P60763|RAC3_HUMAN	RAC3	RAC3_HUMAN Ras-related C3 botulinum toxin substrate 3	2	5.37485	5.75706	6.60347	7.02988	6.11845	6.66104	7.25379	6.6001	6.19131	6.65834	1.07543	0.104918	0.122592	0.0698784
sp|Q8NEZ4-3|KMT2C_HUMAN	KMT2C	KMT2C_HUMAN Isoform 3 of Histone-lysine N-methyltransferase 2C	1	5.50712	6.20461	6.55853	6.15349	6.92329	5.76133	6.62713	6.95093	6.10594	6.56567	1.07529	0.104729	0.0717265	0.0846669
sp|Q92995|UBP13_HUMAN	USP13	UBP13_HUMAN Ubiquitin carboxyl-terminal hydrolase 13	23	5.80629	6.01298	6.18406	6.44372	6.17649	6.43012	6.77196	6.90858	6.11176	6.57179	1.07527	0.104697	0.0441563	0.0504545
sp|P30419|NMT1_HUMAN	NMT1	NMT1_HUMAN Glycylpeptide N-tetradecanoyltransferase 1	12	5.79058	5.8967	6.27973	6.46588	6.28379	6.17503	6.92682	6.8857	6.10822	6.56783	1.07524	0.104665	0.0520267	0.0599363
sp|Q9BV86|NTM1A_HUMAN	NTMT1	NTM1A_HUMAN N-terminal Xaa-Pro-Lys N-methyltransferase 1	6	5.70872	5.77486	6.35294	6.47361	6.19434	6.00622	6.93747	7.00028	6.07753	6.53458	1.0752	0.104608	0.0644556	0.0777369
sp|Q7L2H7|EIF3M_HUMAN	EIF3M	EIF3M_HUMAN Eukaryotic translation initiation factor 3 subunit M	26	5.78912	5.65786	6.12241	5.96536	6.05883	5.88423	6.75108	6.60984	5.88369	6.32599	1.07518	0.104572	0.0344984	0.0663048
sp|O94979-8|SC31A_HUMAN	SEC31A	SC31A_HUMAN Isoform 8 of Protein transport protein Sec31A	40	5.90859	5.78037	6.22845	6.38467	6.36121	6.46477	6.61895	6.6834	6.07552	6.53208	1.07515	0.104535	0.045963	0.0223902
sp|Q9UK61|F208A_HUMAN	FAM208A	F208A_HUMAN Protein FAM208A	1	6.14116	5.13946	6.99728	6.93453	6.28337	7.21639	6.68044	6.92628	6.30311	6.77662	1.07512	0.104503	0.137728	0.0583053
sp|Q86UD1|OAF_HUMAN	OAF	OAF_HUMAN Out at first protein homolog	2	5.79997	5.77601	6.48239	6.45651	6.1143	6.58642	7.05453	6.60063	6.12872	6.58897	1.0751	0.104467	0.0642393	0.0582682
sp|Q96JN8|NEUL4_HUMAN	NEURL4	NEUL4_HUMAN Neuralized-like protein 4	1	4.20134	5.63562	6.17933	6.55237	5.07028	6.28881	6.28789	6.61644	5.64217	6.06585	1.07509	0.104462	0.18285	0.11235
sp|P62195|PRS8_HUMAN	PSMC5	PRS8_HUMAN 26S protease regulatory subunit 8	45	5.93461	5.81445	6.2617	6.37387	6.47307	6.20087	6.7439	6.79672	6.09616	6.55364	1.07504	0.104396	0.0433988	0.0419013
sp|O43172|PRP4_HUMAN	PRPF4	PRP4_HUMAN U4/U6 small nuclear ribonucleoprotein Prp4	20	6.00236	5.61907	6.19559	6.3858	6.20919	6.06812	6.84338	6.89795	6.0507	6.50466	1.07503	0.10437	0.0541392	0.0656627
sp|Q9BUY7|EFC11_HUMAN	EFCAB11	EFC11_HUMAN EF-hand calcium-binding domain-containing protein 11	1	6.97155	6.46183	5.13319	5.38031	6.49693	6.62886	6.79334	5.82283	5.98672	6.43549	1.07496	0.104284	0.145997	0.0662044
sp|O75794|CD123_HUMAN	CDC123	CD123_HUMAN Cell division cycle protein 123 homolog	12	5.6681	5.78757	6.11892	6.25002	6.07798	5.8778	6.85273	6.79886	5.95615	6.40184	1.07483	0.104106	0.0459024	0.0776026
sp|P49588|SYAC_HUMAN	AARS	SYAC_HUMAN Alanine--tRNA ligase, cytoplasmic	63	5.89626	5.68429	6.09138	6.30571	6.32639	6.33254	6.56593	6.54692	5.99441	6.44294	1.07483	0.104103	0.0443591	0.0203772
sp|Q13617-2|CUL2_HUMAN	CUL2	CUL2_HUMAN Isoform 2 of Cullin-2	37	5.88765	5.59967	6.31198	6.3333	6.29032	5.91486	6.9073	6.82507	6.03315	6.48439	1.07479	0.104059	0.0587509	0.0721663
sp|O75182|SIN3B_HUMAN	SIN3B	SIN3B_HUMAN Paired amphipathic helix protein Sin3b	9	5.74313	5.70145	6.4144	6.42619	6.31455	6.26846	6.72842	6.78977	6.07129	6.5253	1.07478	0.104041	0.0664407	0.0416494
sp|Q9Y6Q5-2|AP1M2_HUMAN	AP1M2	AP1M2_HUMAN Isoform 2 of AP-1 complex subunit mu-2	14	5.76641	6.20239	6.33687	6.39382	6.13446	6.65079	7.09562	6.66542	6.17487	6.63657	1.07477	0.104029	0.045975	0.0592511
sp|Q7Z7H8-2|RM10_HUMAN	MRPL10	RM10_HUMAN Isoform 2 of 39S ribosomal protein L10, mitochondrial	9	5.94878	5.68124	5.99137	6.29158	6.5406	6.35912	6.53194	6.26862	5.97824	6.42507	1.07474	0.103991	0.0418106	0.0208028
tr|E9PAU2|E9PAU2_HUMAN	RAVER1	E9PAU2_HUMAN Ribonucleoprotein PTB-binding 1	26	5.74994	5.97604	5.96389	6.31189	6.16342	6.39382	6.6014	6.63587	6.00044	6.44863	1.07469	0.103924	0.038689	0.0338263
sp|Q9UBQ7|GRHPR_HUMAN	GRHPR	GRHPR_HUMAN Glyoxylate reductase/hydroxypyruvate reductase	23	5.51454	5.55269	6.20361	6.52552	5.84892	6.00375	6.66038	7.06053	5.94909	6.39339	1.07468	0.103913	0.0836544	0.0886926
sp|Q8N163|CCAR2_HUMAN	CCAR2	CCAR2_HUMAN Cell cycle and apoptosis regulator protein 2	44	6.01711	5.80153	6.12372	6.348	6.31695	6.24726	6.7495	6.79062	6.07259	6.52608	1.07468	0.103905	0.037433	0.0434642
sp|Q15020|SART3_HUMAN	SART3	SART3_HUMAN Squamous cell carcinoma antigen recognized by T-cells 3	38	5.77735	5.57586	6.23525	6.30641	6.01149	5.97749	6.76201	6.92797	5.97372	6.41974	1.07466	0.103886	0.0592585	0.0772435
sp|A1XBS5|F92A1_HUMAN	FAM92A1	F92A1_HUMAN Protein FAM92A1	8	5.71897	5.71942	6.09542	6.54441	6.22442	6.25403	6.56137	6.83583	6.01955	6.46891	1.07465	0.103866	0.0651683	0.0445471
tr|A6NF51|A6NF51_HUMAN	BPNT1	A6NF51_HUMAN 3'(2'),5'-bisphosphate nucleotidase 1	1	6.16105	5.72209	6.66259	6.18924	6.19268	6.83901	6.66188	6.88614	6.18374	6.64493	1.07458	0.103773	0.0621401	0.0476422
sp|Q9HA72|CAHM2_HUMAN	CALHM2	CAHM2_HUMAN Calcium homeostasis modulator protein 2	1	5.50731	6.05736	6.0442	6.64694	5.59688	7.47155	7.34156	5.6545	6.06395	6.51612	1.07457	0.103755	0.0767703	0.158042
sp|Q9Y548|YIPF1_HUMAN	YIPF1	YIPF1_HUMAN Protein YIPF1	1	5.94057	5.47735	6.55885	5.9026	6.91795	6.63051	6.10332	6.00796	5.96984	6.41494	1.07456	0.103742	0.0745904	0.0674845
sp|Q04917|1433F_HUMAN	YWHAH	1433F_HUMAN 14-3-3 protein eta	22	6.02292	6.09602	5.83442	5.91789	6.11377	6.30944	6.59529	6.63216	5.96781	6.41267	1.07454	0.103722	0.0192906	0.038359
sp|Q9Y5X1|SNX9_HUMAN	SNX9	SNX9_HUMAN Sorting nexin-9	10	5.56299	5.83356	6.36451	6.3385	6.25521	6.22985	6.6173	6.79326	6.02489	6.47391	1.07453	0.103701	0.0652509	0.0427642
sp|Q53T94|TAF1B_HUMAN	TAF1B	TAF1B_HUMAN TATA box-binding protein-associated factor RNA polymerase I subunit B	3	5.86205	6.04851	6.33834	6.43017	6.49401	6.70772	6.6512	6.66424	6.16977	6.62929	1.07448	0.103639	0.0424329	0.0140844
sp|O75915|PRAF3_HUMAN	ARL6IP5	PRAF3_HUMAN PRA1 family protein 3	5	5.91361	6.3364	6.39569	5.93206	6.7261	6.32059	6.50837	6.85254	6.14444	6.6019	1.07445	0.1036	0.0418492	0.0356446
sp|Q9C0H9-5|SRCN1_HUMAN	SRCIN1	SRCN1_HUMAN Isoform 4 of SRC kinase signaling inhibitor 1	3	5.54445	6.01025	6.55126	6.55528	6.91006	6.4333	6.60652	6.54719	6.16531	6.62427	1.07444	0.103587	0.0789369	0.0307408
sp|Q9NZS9|BFAR_HUMAN	BFAR	BFAR_HUMAN Bifunctional apoptosis regulator	1	4.69579	4.90614	6.1058	7.65876	3.96982	6.2126	6.87767	8.0457	5.84162	6.27645	1.07444	0.103579	0.233043	0.27313
sp|Q9H900|ZWILC_HUMAN	ZWILCH	ZWILC_HUMAN Protein zwilch homolog	7	5.79691	6.08085	6.29824	6.07935	6.25478	6.57772	6.46673	6.76127	6.06384	6.51513	1.07442	0.103562	0.033894	0.0325149
sp|Q9UIG0|BAZ1B_HUMAN	BAZ1B	BAZ1B_HUMAN Tyrosine-protein kinase BAZ1B	2	5.69794	5.68537	7.00682	6.30516	6.27887	6.98259	7.00997	6.26133	6.17382	6.63319	1.07441	0.103539	0.10142	0.0632381
sp|Q96I15|SCLY_HUMAN	SCLY	SCLY_HUMAN Selenocysteine lyase	15	6.09744	6.2766	5.95218	6.00842	6.64795	6.5257	6.55818	6.41153	6.08366	6.53584	1.07433	0.103433	0.0233165	0.0149451
sp|Q99623|PHB2_HUMAN	PHB2	PHB2_HUMAN Prohibitin-2	58	5.68586	5.69151	6.22599	6.28921	6.24567	5.9718	6.73087	6.71692	5.97314	6.41631	1.07419	0.103255	0.0551609	0.0580379
sp|Q07866-4|KLC1_HUMAN	KLC1	KLC1_HUMAN Isoform J of Kinesin light chain 1	50	5.85455	5.889	6.00742	6.42561	6.16013	6.10394	6.87665	6.82876	6.04414	6.49237	1.07416	0.103207	0.0434474	0.0642553
sp|Q96MW5|COG8_HUMAN	COG8	COG8_HUMAN Conserved oligomeric Golgi complex subunit 8	11	5.8606	5.70825	6.22252	6.56684	6.53549	6.28171	6.75048	6.59684	6.08955	6.54113	1.07416	0.103204	0.0631248	0.0298357
sp|O94876|TMCC1_HUMAN	TMCC1	TMCC1_HUMAN Transmembrane and coiled-coil domains protein 1	1	4.72394	5.22165	6.65691	7.66659	5.53309	7.40947	6.38292	6.74132	6.06727	6.5167	1.07407	0.103093	0.221641	0.119944
sp|Q9H501|ESF1_HUMAN	ESF1	ESF1_HUMAN ESF1 homolog	11	6.20553	5.79336	6.49572	5.72637	6.92842	6.49356	6.32738	6.26467	6.05525	6.50351	1.07403	0.103033	0.0597992	0.046019
sp|Q96JZ2|HSH2D_HUMAN	HSH2D	HSH2D_HUMAN Hematopoietic SH2 domain-containing protein	1	6.00584	5.56266	6.46294	6.07586	7.21967	7.27235	6.43808	4.96027	6.02682	6.47259	1.07396	0.102946	0.0612268	0.166544
sp|O43542|XRCC3_HUMAN	XRCC3	XRCC3_HUMAN DNA repair protein XRCC3	4	6.01253	5.44919	6.35997	6.37304	6.22977	6.58315	6.44482	6.72612	6.04868	6.49596	1.07395	0.102923	0.0716074	0.0325406
sp|O14531|DPYL4_HUMAN	DPYSL4	DPYL4_HUMAN Dihydropyrimidinase-related protein 4	4	5.7912	5.90388	6.48653	6.29714	6.51977	6.41939	6.66986	6.6793	6.11969	6.57208	1.07392	0.102892	0.0534135	0.019067
sp|Q5T1C6|THEM4_HUMAN	THEM4	THEM4_HUMAN Acyl-coenzyme A thioesterase THEM4	9	5.81864	6.20877	6.30599	5.74679	6.74755	6.56836	6.15888	6.38527	6.02005	6.46501	1.07391	0.102879	0.0462549	0.0389864
sp|O75390|CISY_HUMAN	CS	CISY_HUMAN Citrate synthase, mitochondrial	32	5.6168	5.96132	5.83111	6.1154	5.97058	6.28579	6.66732	6.33783	5.88116	6.31538	1.07383	0.102769	0.0358937	0.0451699
sp|Q8N465|D2HDH_HUMAN	D2HGDH	D2HDH_HUMAN D-2-hydroxyglutarate dehydrogenase, mitochondrial	6	6.04501	5.88803	6.0755	6.48124	6.25262	6.29931	6.78272	6.9632	6.12244	6.57446	1.07383	0.102765	0.041308	0.0536892
sp|P78362-2|SRPK2_HUMAN	SRPK2	SRPK2_HUMAN Isoform 2 of SRSF protein kinase 2	9	6.11328	6.04017	6.09998	6.1532	6.78392	6.77908	6.5577	6.08708	6.10166	6.55194	1.0738	0.102722	0.00767268	0.049967
tr|H7BY16|H7BY16_HUMAN	NCL	H7BY16_HUMAN Nucleolin (Fragment)	1	5.99896	6.32822	6.55414	6.09931	6.14255	6.17732	6.84131	7.66244	6.24516	6.70591	1.07378	0.102694	0.039683	0.106497
sp|Q8WUH2|TGFA1_HUMAN	TGFBRAP1	TGFA1_HUMAN Transforming growth factor-beta receptor-associated protein 1	3	5.5444	5.84735	6.10797	6.09843	5.36681	6.72015	7.67059	5.58116	5.89954	6.33468	1.07376	0.102669	0.0450437	0.168988
sp|O43615|TIM44_HUMAN	TIMM44	TIM44_HUMAN Mitochondrial import inner membrane translocase subunit TIM44	28	5.97021	5.7621	6.20154	6.44994	6.525	6.20841	6.81052	6.63552	6.09595	6.54486	1.07364	0.102512	0.0486377	0.0386925
sp|Q9Y2S2|CRYL1_HUMAN	CRYL1	CRYL1_HUMAN Lambda-crystallin homolog	4	5.93497	5.87144	6.28509	6.46499	6.24365	6.36541	7.18508	6.57006	6.13912	6.59105	1.07361	0.102476	0.0461516	0.0634641
sp|Q86UW7|CAPS2_HUMAN	CADPS2	CAPS2_HUMAN Calcium-dependent secretion activator 2	4	5.53563	5.80634	6.14149	6.88775	6.24509	6.71176	6.91965	6.288	6.0928	6.54113	1.07358	0.102433	0.0960214	0.0502494
sp|Q9Y2H5|PKHA6_HUMAN	PLEKHA6	PKHA6_HUMAN Pleckstrin homology domain-containing family A member 6	1	6.28574	5.77136	6.09385	5.79639	6.69517	6.37254	6.05893	6.5827	5.98683	6.42734	1.07358	0.102427	0.0413099	0.0435082
sp|P10244|MYBB_HUMAN	MYBL2	MYBB_HUMAN Myb-related protein B	2	5.40697	6.23106	6.59813	6.2509	6.79971	6.18993	5.81917	7.47891	6.12176	6.57193	1.07354	0.102369	0.0825681	0.110674
sp|Q15046|SYK_HUMAN	KARS	SYK_HUMAN Lysine--tRNA ligase	41	5.81833	5.63488	6.20137	6.16837	6.28411	6.23608	6.65472	6.39964	5.95574	6.39364	1.07353	0.102357	0.0462251	0.0292637
sp|O14807|RASM_HUMAN	MRAS	RASM_HUMAN Ras-related protein M-Ras	2	6.47202	6.56028	5.49612	7.05109	6.97741	7.07163	6.47254	6.93866	6.39488	6.86506	1.07352	0.102356	0.101812	0.0389758
sp|Q53FT3|HIKES_HUMAN	C11orf73	HIKES_HUMAN Protein Hikeshi	4	5.84212	5.85633	6.17766	6.1153	6.40214	6.00419	6.8497	6.49922	5.99785	6.43881	1.07352	0.102349	0.0289429	0.0540031
sp|Q9Y3Y2-3|CHTOP_HUMAN	CHTOP	CHTOP_HUMAN Isoform 2 of Chromatin target of PRMT1 protein	1	6.70616	5.21533	5.08207	6.45542	6.0935	6.13148	7.17111	5.78675	5.86475	6.29571	1.07348	0.102301	0.14236	0.0958848
sp|P19387|RPB3_HUMAN	POLR2C	RPB3_HUMAN DNA-directed RNA polymerase II subunit RPB3	3	5.69472	6.34333	7.25707	6.26395	6.68731	7.46666	6.82385	6.45892	6.38977	6.85919	1.07346	0.102274	0.101153	0.06299
sp|P46013-2|KI67_HUMAN	MKI67	KI67_HUMAN Isoform Short of Antigen KI-67	1	6.51252	5.47506	6.84711	6.56917	6.88263	6.42079	7.08747	6.8786	6.35097	6.81737	1.07344	0.10224	0.0947831	0.0413359
sp|Q9Y676|RT18B_HUMAN	MRPS18B	RT18B_HUMAN 28S ribosomal protein S18b, mitochondrial	8	5.73304	5.68315	6.57416	6.34065	6.02847	6.38569	6.82742	6.87407	6.08275	6.52891	1.07335	0.102119	0.0729047	0.0612146
sp|Q9Y371-2|SHLB1_HUMAN	SH3GLB1	SHLB1_HUMAN Isoform 2 of Endophilin-B1	7	6.02856	5.93527	5.94065	6.33649	6.42176	6.22675	6.34095	7.02952	6.06024	6.50474	1.07335	0.102117	0.0311976	0.0551721
sp|P49642|PRI1_HUMAN	PRIM1	PRI1_HUMAN DNA primase small subunit	14	6.00964	5.5817	6.24546	6.37316	6.36548	6.25413	6.81589	6.54992	6.05249	6.49635	1.07334	0.102102	0.0575155	0.0377865
sp|Q5SWX8|ODR4_HUMAN	ODR4	ODR4_HUMAN Protein odr-4 homolog	10	5.88901	5.91985	6.42369	6.45226	6.24332	6.4413	6.84738	6.96183	6.1712	6.62346	1.07328	0.102033	0.0499935	0.0510003
sp|Q9P2K2|TXD16_HUMAN	TXNDC16	TXD16_HUMAN Thioredoxin domain-containing protein 16	1	6.0801	6.114	5.78439	6.82732	6.08249	6.11762	7.07455	7.34751	6.20145	6.65554	1.07322	0.10195	0.0713911	0.0978414
sp|Q15526|SURF1_HUMAN	SURF1	SURF1_HUMAN Surfeit locus protein 1	10	5.81939	5.81533	6.00836	6.31673	5.98733	6.35935	7.0767	6.29037	5.98995	6.42844	1.0732	0.101924	0.0393544	0.071774
tr|G3V4T6|G3V4T6_HUMAN	GSTZ1	G3V4T6_HUMAN Maleylacetoacetate isomerase	9	5.51901	5.71791	5.97108	6.62603	6.04783	6.52605	6.46502	6.53922	5.95851	6.39453	1.07318	0.101887	0.0808822	0.0364972
sp|Q8TBK6|ZCH10_HUMAN	ZCCHC10	ZCH10_HUMAN Zinc finger CCHC domain-containing protein 10	1	5.20213	6.25446	6.35019	6.26632	5.75318	6.27005	6.64652	7.16491	6.01828	6.45866	1.07318	0.101886	0.0906842	0.0923531
sp|P50224-3|ST1A3_HUMAN	SULT1A3	ST1A3_HUMAN Isoform 3 of Sulfotransferase 1A3/1A4	5	6.26515	5.83078	6.66354	6.28823	6.77722	6.3553	7.00856	6.73936	6.26192	6.72011	1.07317	0.101879	0.0543811	0.04029
sp|P61019|RAB2A_HUMAN	RAB2A	RAB2A_HUMAN Ras-related protein Rab-2A	8	5.98171	5.68733	6.3585	5.97741	5.99503	6.32959	6.47455	6.96109	6.00124	6.44007	1.07312	0.101815	0.045849	0.0622996
sp|Q15057|ACAP2_HUMAN	ACAP2	ACAP2_HUMAN Arf-GAP with coiled-coil, ANK repeat and PH domain-containing protein 2	13	5.89005	5.72664	6.14976	6.56602	6.53237	6.09834	6.67076	6.81013	6.08312	6.5279	1.07312	0.101808	0.0601754	0.0471831
sp|Q9Y653|GPR56_HUMAN	GPR56	GPR56_HUMAN G-protein coupled receptor 56	7	5.98295	5.87066	6.03538	6.18514	6.51327	6.67101	6.43284	6.2148	6.01853	6.45798	1.07302	0.101671	0.0217007	0.0294084
sp|O75436|VP26A_HUMAN	VPS26A	VP26A_HUMAN Vacuolar protein sorting-associated protein 26A	19	5.8758	5.67676	6.2451	6.37919	6.37922	6.51285	6.66442	6.38517	6.04421	6.48541	1.073	0.101645	0.0536919	0.0207104
sp|Q9H0C8|ILKAP_HUMAN	ILKAP	ILKAP_HUMAN Integrin-linked kinase-associated serine/threonine phosphatase 2C	17	5.79011	5.55662	6.09067	6.47589	6.01638	5.95325	6.62371	7.0652	5.97832	6.41463	1.07298	0.101626	0.0664505	0.082414
sp|A5PLN9-5|TPC13_HUMAN	TRAPPC13	TPC13_HUMAN Isoform 4 of Trafficking protein particle complex subunit 13	5	5.63815	5.62577	6.52105	6.68647	5.77899	6.61838	6.87354	6.98492	6.11786	6.56396	1.07292	0.101539	0.0923756	0.0830809
sp|Q96HA8|NTAQ1_HUMAN	WDYHV1	NTAQ1_HUMAN Protein N-terminal glutamine amidohydrolase	3	5.47401	6.37637	6.97006	5.98292	7.15499	5.31649	6.85494	7.28539	6.20084	6.65295	1.07291	0.101531	0.101922	0.136634
sp|P14866|HNRPL_HUMAN	HNRNPL	HNRPL_HUMAN Heterogeneous nuclear ribonucleoprotein L	30	5.73378	5.86818	6.04113	6.30601	6.37881	6.27027	6.51515	6.53046	5.98728	6.42367	1.07289	0.101499	0.0412439	0.0191331
sp|Q8IZL8-2|PELP1_HUMAN	PELP1	PELP1_HUMAN Isoform 2 of Proline-, glutamic acid- and leucine-rich protein 1	10	6.20323	5.97158	6.25593	6.16948	6.86859	6.52869	6.63252	6.36258	6.15006	6.5981	1.07285	0.10145	0.0201929	0.0321072
sp|P79522|PRR3_HUMAN	PRR3	PRR3_HUMAN Proline-rich protein 3	1	6.22744	6.00112	6.72788	5.47319	6.60007	6.60819	6.46747	6.53284	6.10741	6.55214	1.07282	0.101407	0.0852329	0.0100392
sp|Q8TDZ2-4|MICA1_HUMAN	MICAL1	MICA1_HUMAN Isoform 4 of Protein-methionine sulfoxide oxidase MICAL1	9	5.66279	6.04685	6.26056	6.58232	6.19913	6.72788	6.51383	6.89887	6.13813	6.58493	1.07279	0.101368	0.0628565	0.0458018
sp|Q86TI0|TBCD1_HUMAN	TBC1D1	TBCD1_HUMAN TBC1 domain family member 1	7	5.81428	5.59101	6.56471	6.57868	6.35534	6.40195	6.72998	6.84759	6.13717	6.58372	1.07276	0.101328	0.0830986	0.0368123
sp|O14939|PLD2_HUMAN	PLD2	PLD2_HUMAN Phospholipase D2	4	5.60434	5.49302	6.53289	6.48595	6.41886	6.55099	6.45749	6.44309	6.02905	6.46761	1.07274	0.101301	0.0923648	0.00894126
sp|O00629|IMA3_HUMAN	KPNA4	IMA3_HUMAN Importin subunit alpha-3	18	5.88505	5.89736	6.12185	6.51863	6.31096	6.182	6.99674	6.70862	6.10572	6.54958	1.0727	0.10124	0.0484806	0.0569443
sp|Q5BJD5|TM41B_HUMAN	TMEM41B	TM41B_HUMAN Transmembrane protein 41B	1	5.61257	5.95302	6.98924	6.49473	6.02987	7.36546	7.76843	5.70621	6.26239	6.71749	1.07267	0.101209	0.0967049	0.149357
sp|P06730-2|IF4E_HUMAN	EIF4E	IF4E_HUMAN Isoform 2 of Eukaryotic translation initiation factor 4E	9	5.60902	5.69814	6.11854	6.43157	5.8579	5.98522	6.79692	6.95035	5.96432	6.3976	1.07265	0.101173	0.0641517	0.0868567
sp|Q9UBV7|B4GT7_HUMAN	B4GALT7	B4GT7_HUMAN Beta-1,4-galactosyltransferase 7	1	5.5231	6.73363	6.38271	6.4523	6.5655	6.00815	7.19174	7.14852	6.27294	6.72848	1.07262	0.101139	0.0832789	0.0830371
sp|Q13459|MYO9B_HUMAN	MYO9B	MYO9B_HUMAN Unconventional myosin-IXb	16	5.90425	5.93161	6.5755	6.30608	6.52811	6.48052	6.94307	6.56024	6.17936	6.62798	1.0726	0.101113	0.052025	0.0320752
sp|O43556|SGCE_HUMAN	SGCE	SGCE_HUMAN Epsilon-sarcoglycan	1	5.64438	6.26783	6.80534	6.21309	6.17711	6.52996	7.10741	6.92467	6.23266	6.68479	1.07254	0.101034	0.0761428	0.0621525
sp|Q8TEM1|PO210_HUMAN	NUP210	PO210_HUMAN Nuclear pore membrane glycoprotein 210	46	5.83124	5.87799	6.17268	6.26012	6.19668	6.29922	6.79002	6.60637	6.03551	6.47307	1.0725	0.100976	0.0352519	0.0422929
sp|Q9Y4Z0|LSM4_HUMAN	LSM4	LSM4_HUMAN U6 snRNA-associated Sm-like protein LSm4	17	6.4039	6.56774	5.55888	5.81111	6.40215	6.70418	6.90866	6.09125	6.08541	6.52656	1.07249	0.100969	0.0786116	0.0547121
sp|Q969G5|PRDBP_HUMAN	PRKCDBP	PRDBP_HUMAN Protein kinase C delta-binding protein	4	6.26186	5.72679	6.05569	6.15092	6.609	6.06575	6.37675	6.897	6.04881	6.48713	1.07246	0.100927	0.038127	0.0543254
sp|Q6GQQ9|OTU7B_HUMAN	OTUD7B	OTU7B_HUMAN OTU domain-containing protein 7B	8	5.86524	6.04163	6.06866	6.73799	6.45554	6.50391	6.74517	6.79687	6.17838	6.62537	1.07235	0.100773	0.0621235	0.0257563
sp|P12694|ODBA_HUMAN	BCKDHA	ODBA_HUMAN 2-oxoisovalerate dehydrogenase subunit alpha, mitochondrial	11	5.81649	5.98542	5.69716	6.49493	6.35139	6.52697	6.36511	6.48515	5.9985	6.43216	1.07229	0.1007	0.0585893	0.0135583
sp|P00519-2|ABL1_HUMAN	ABL1	ABL1_HUMAN Isoform IB of Tyrosine-protein kinase ABL1	3	5.92513	5.93973	6.61491	6.11677	6.63894	6.60152	6.53479	6.59767	6.14914	6.59323	1.07222	0.100602	0.0524467	0.00654887
sp|Q6ZMK1|CYHR1_HUMAN	CYHR1	CYHR1_HUMAN Cysteine and histidine-rich protein 1	5	5.74951	6.56066	5.9967	6.08032	5.95511	6.73004	6.50797	6.95477	6.0968	6.53697	1.0722	0.100571	0.0557081	0.0655739
sp|P51553|IDH3G_HUMAN	IDH3G	IDH3G_HUMAN Isocitrate dehydrogenase [NAD] subunit gamma, mitochondrial	12	6.01831	6.02544	5.82168	6.07119	6.29086	6.43218	6.52598	6.41417	5.98415	6.4158	1.07213	0.100481	0.0185192	0.0150636
sp|Q69YN2|C19L1_HUMAN	CWF19L1	C19L1_HUMAN CWF19-like protein 1	22	5.62724	5.6822	6.16172	6.55136	6.05542	6.19732	6.73135	6.76979	6.00563	6.43847	1.07207	0.100402	0.0725784	0.0567442
sp|P50747|BPL1_HUMAN	HLCS	BPL1_HUMAN Biotin--protein ligase	7	5.85014	5.76025	6.17094	6.59059	6.47003	6.03755	6.4871	7.12967	6.09298	6.53109	1.0719	0.100175	0.0616555	0.0689037
sp|P30740|ILEU_HUMAN	SERPINB1	ILEU_HUMAN Leukocyte elastase inhibitor	28	5.81477	5.76706	6.30701	6.24195	6.2616	6.16024	6.82835	6.61399	6.0327	6.46605	1.07183	0.10008	0.0465998	0.0479566
sp|Q92506|DHB8_HUMAN	HSD17B8	DHB8_HUMAN Estradiol 17-beta-dehydrogenase 8	5	5.79859	6.30576	6.16286	5.89953	6.61587	6.50668	6.52543	6.25159	6.04168	6.47489	1.0717	0.0999053	0.0386665	0.0241417
sp|P50570-4|DYN2_HUMAN	DNM2	DYN2_HUMAN Isoform 4 of Dynamin-2	28	5.73217	5.60345	6.08978	6.58857	6.05938	6.16821	6.7674	6.73929	6.00349	6.43357	1.07164	0.0998175	0.0734552	0.0578349
sp|O75064|DEN4B_HUMAN	DENND4B	DEN4B_HUMAN DENN domain-containing protein 4B	2	5.61387	5.69128	6.45727	6.21183	6.11232	5.92561	7.02686	6.62587	5.99356	6.42266	1.07159	0.0997583	0.0679922	0.0778349
sp|Q3T906|GNPTA_HUMAN	GNPTAB	GNPTA_HUMAN N-acetylglucosamine-1-phosphotransferase subunits alpha/beta	5	5.94777	5.75442	5.92903	6.44897	6.65221	6.2893	6.57326	6.28705	6.02005	6.45046	1.0715	0.0996261	0.0496524	0.0294768
sp|Q9UBZ4|APEX2_HUMAN	APEX2	APEX2_HUMAN DNA-(apurinic or apyrimidinic site) lyase 2	3	6.01843	6.3551	6.4204	6.03459	6.56046	6.40055	7.45274	6.18866	6.20713	6.6506	1.07145	0.0995587	0.0338904	0.0836041
sp|O14526|FCHO1_HUMAN	FCHO1	FCHO1_HUMAN FCH domain only protein 1	2	5.189	5.81877	6.2374	6.7581	6.42816	6.49753	6.36784	6.42344	6.00082	6.42924	1.07139	0.0994897	0.110608	0.00826376
sp|P48444|COPD_HUMAN	ARCN1	COPD_HUMAN Coatomer subunit delta	41	5.9645	5.88671	6.09687	6.31597	6.20447	6.44326	6.77292	6.57537	6.06601	6.499	1.07138	0.0994704	0.0309709	0.0367057
sp|Q9H993|CF211_HUMAN	C6orf211	CF211_HUMAN UPF0364 protein C6orf211	14	5.78456	5.40192	6.36115	6.32262	6.15814	6.30021	6.96706	6.14766	5.96756	6.39327	1.07134	0.0994117	0.0770602	0.0608146
sp|P82673|RT35_HUMAN	MRPS35	RT35_HUMAN 28S ribosomal protein S35, mitochondrial	14	5.7293	5.80187	6.11673	6.55045	6.25522	6.14034	6.68896	6.83924	6.04959	6.48094	1.0713	0.0993663	0.0617997	0.0518383
sp|Q01780|EXOSX_HUMAN	EXOSC10	EXOSX_HUMAN Exosome component 10	27	5.54628	5.43224	6.54118	6.24962	6.42163	6.46194	6.23583	6.34394	5.94233	6.36583	1.07127	0.099321	0.0906288	0.015638
sp|Q5THJ4|VP13D_HUMAN	VPS13D	VP13D_HUMAN Vacuolar protein sorting-associated protein 13D	7	5.63772	5.61891	6.34536	6.60425	6.21499	6.49792	6.67761	6.53874	6.05156	6.48232	1.07118	0.099202	0.0826362	0.0299438
sp|Q13487|SNPC2_HUMAN	SNAPC2	SNPC2_HUMAN snRNA-activating protein complex subunit 2	3	6.3581	6.04882	6.58321	6.14327	6.78163	7.2786	6.01054	6.85126	6.28335	6.73051	1.07117	0.0991813	0.0379	0.0784301
sp|Q9P2E5|CHPF2_HUMAN	CHPF2	CHPF2_HUMAN Chondroitin sulfate glucuronyltransferase	2	5.46537	5.27631	6.7263	6.56093	6.30653	6.3286	6.6999	6.40052	6.00723	6.43389	1.07102	0.0989914	0.123511	0.0282606
sp|Q9NX08|COMD8_HUMAN	COMMD8	COMD8_HUMAN COMM domain-containing protein 8	8	5.96487	5.9812	5.93041	6.06848	6.50797	6.21458	6.32532	6.59759	5.98624	6.41136	1.07102	0.0989814	0.00981787	0.0270364
sp|P36543|VATE1_HUMAN	ATP6V1E1	VATE1_HUMAN V-type proton ATPase subunit E 1	14	5.83668	5.90185	6.28385	6.36749	6.3198	6.4282	6.74479	6.62786	6.09747	6.53016	1.07096	0.0989087	0.0437948	0.0293577
sp|Q5FWF5|ESCO1_HUMAN	ESCO1	ESCO1_HUMAN N-acetyltransferase ESCO1	1	5.612	6.0666	6.84498	5.7265	5.67278	6.41092	7.34225	6.54308	6.06252	6.49226	1.07088	0.0988026	0.0917471	0.105344
sp|Q9ULU4-7|PKCB1_HUMAN	ZMYND8	PKCB1_HUMAN Isoform 7 of Protein kinase C-binding protein 1	1	5.33705	5.79784	7.0423	7.56185	6.28349	6.90068	7.17737	7.20185	6.43476	6.89085	1.07088	0.0987951	0.161753	0.0620121
sp|Q9HB20|PKHA3_HUMAN	PLEKHA3	PKHA3_HUMAN Pleckstrin homology domain-containing family A member 3	2	5.70615	5.41826	6.26941	6.87608	6.08752	6.60295	6.33244	6.96498	6.06747	6.49697	1.07079	0.0986713	0.106244	0.0579315
sp|O95478|NSA2_HUMAN	NSA2	NSA2_HUMAN Ribosome biogenesis protein NSA2 homolog	1	6.11399	6.04371	6.76202	6.16271	6.32638	7.64243	6.88478	6.00358	6.27061	6.71429	1.07076	0.0986302	0.0528226	0.10692
sp|P25685|DNJB1_HUMAN	DNAJB1	DNJB1_HUMAN DnaJ homolog subfamily B member 1	26	6.08283	5.92009	6.03063	6.106	6.41542	6.36274	6.39848	6.67069	6.03489	6.46183	1.07075	0.0986165	0.0137151	0.0218141
sp|Q15293|RCN1_HUMAN	RCN1	RCN1_HUMAN Reticulocalbin-1	23	6.17213	6.46855	5.98586	6.02361	6.69651	6.75185	6.41723	6.52704	6.16254	6.59816	1.07069	0.0985387	0.0355828	0.0233299
sp|O75131|CPNE3_HUMAN	CPNE3	CPNE3_HUMAN Copine-3	36	6.11438	6.16303	6.14233	6.22296	6.38552	6.48277	6.71864	6.79613	6.16068	6.59577	1.07062	0.0984516	0.00747655	0.0293224
sp|Q16513|PKN2_HUMAN	PKN2	PKN2_HUMAN Serine/threonine-protein kinase N2	41	5.86597	5.99814	6.17574	6.32661	6.47533	6.23196	6.78031	6.59935	6.09162	6.52174	1.07061	0.0984316	0.0330981	0.0353009
sp|O76075|DFFB_HUMAN	DFFB	DFFB_HUMAN DNA fragmentation factor subunit beta	7	5.76379	6.02112	6.0542	6.34521	6.39146	6.51146	6.38806	6.60032	6.04608	6.47283	1.07058	0.0983954	0.0393555	0.015844
sp|Q96MX6|WDR92_HUMAN	WDR92	WDR92_HUMAN WD repeat-containing protein 92	7	6.11786	5.54206	6.0655	6.39276	6.36486	6.40621	6.6325	6.41625	6.02954	6.45495	1.07055	0.0983579	0.0589222	0.0186577
sp|Q12907|LMAN2_HUMAN	LMAN2	LMAN2_HUMAN Vesicular integral-membrane protein VIP36	29	5.91078	5.84587	6.09955	6.32661	6.2261	6.21627	6.8359	6.6105	6.0457	6.47219	1.07054	0.0983445	0.035725	0.046989
sp|P03905|NU4M_HUMAN	MT-ND4	NU4M_HUMAN NADH-ubiquinone oxidoreductase chain 4	3	5.51746	5.33024	6.36413	6.695	5.90262	6.25335	6.6822	6.75471	5.97671	6.39822	1.07053	0.0983197	0.109923	0.0621475
sp|P68400|CSK21_HUMAN	CSNK2A1	CSK21_HUMAN Casein kinase II subunit alpha	40	6.12508	6.2257	6.13103	6.23271	6.68408	6.61768	6.40304	6.75271	6.17863	6.61438	1.07052	0.0983184	0.00947127	0.0228734
sp|P22670|RFX1_HUMAN	RFX1	RFX1_HUMAN MHC class II regulatory factor RFX1	9	6.09463	6.02742	6.30578	6.1913	6.64825	6.82363	6.4294	6.45311	6.15478	6.5886	1.07048	0.0982635	0.0196708	0.0280548
tr|Q5TFK1|Q5TFK1_HUMAN	EIF3I	Q5TFK1_HUMAN Eukaryotic translation initiation factor 3 subunit I (Fragment)	2	7.10606	6.5671	5.39151	5.72899	6.4214	5.29813	5.9207	8.89939	6.19841	6.6349	1.07042	0.0981765	0.126045	0.237838
sp|P13473-2|LAMP2_HUMAN	LAMP2	LAMP2_HUMAN Isoform LAMP-2B of Lysosome-associated membrane glycoprotein 2	7	5.55418	5.8579	6.09173	6.60338	6.36607	6.72285	6.22634	6.4876	6.0268	6.45072	1.07034	0.0980675	0.0734932	0.0326316
sp|P35237|SPB6_HUMAN	SERPINB6	SPB6_HUMAN Serpin B6	28	6.05358	5.8165	6.11333	6.35933	6.31992	6.39206	6.78893	6.55386	6.08568	6.51369	1.07033	0.098056	0.0366372	0.0319228
sp|P82912|RT11_HUMAN	MRPS11	RT11_HUMAN 28S ribosomal protein S11, mitochondrial	3	5.87113	5.97476	5.85005	6.2148	6.40246	6.20267	6.78481	6.2024	5.97769	6.39809	1.07033	0.0980533	0.0279722	0.0429039
sp|Q86WN1|FCSD1_HUMAN	FCHSD1	FCSD1_HUMAN FCH and double SH3 domains protein 1	2	5.26057	6.29698	5.88755	7.18606	7.23689	5.79147	6.63734	6.69611	6.15779	6.59045	1.07026	0.0979649	0.131087	0.0906021
sp|Q15813|TBCE_HUMAN	TBCE	TBCE_HUMAN Tubulin-specific chaperone E	28	6.08761	5.85651	6.20096	6.27883	6.36759	6.16956	6.89462	6.70767	6.10598	6.53486	1.07024	0.0979341	0.03012	0.0500336
sp|Q8NBP7|PCSK9_HUMAN	PCSK9	PCSK9_HUMAN Proprotein convertase subtilisin/kexin type 9	4	5.49355	6.36837	6.49154	6.27918	6.54654	6.68633	6.55061	6.57896	6.15816	6.59061	1.07022	0.0979126	0.0733249	0.00992658
sp|Q13153|PAK1_HUMAN	PAK1	PAK1_HUMAN Serine/threonine-protein kinase PAK 1	23	5.68115	6.15133	5.92036	6.29332	6.41528	6.24312	6.42702	6.64844	6.01154	6.43346	1.07019	0.0978613	0.0446781	0.0258259
sp|P50454|SERPH_HUMAN	SERPINH1	SERPH_HUMAN Serpin H1	40	5.85469	5.74965	6.2529	6.31814	6.25411	6.23281	6.69428	6.69081	6.04385	6.468	1.07018	0.0978536	0.0469223	0.0401096
sp|Q05BQ5|MBTD1_HUMAN	MBTD1	MBTD1_HUMAN MBT domain-containing protein 1	5	5.52445	5.69598	6.68665	6.50503	6.20994	6.59819	6.39612	6.92063	6.10303	6.53122	1.07016	0.0978274	0.0947264	0.046575
sp|Q16656|NRF1_HUMAN	NRF1	NRF1_HUMAN Nuclear respiratory factor 1	5	5.98076	6.26867	6.32871	6.00596	6.49741	6.20512	6.67593	6.9285	6.14602	6.57674	1.07008	0.097719	0.0290066	0.0462835
sp|Q8IVL0|NAV3_HUMAN	NAV3	NAV3_HUMAN Neuron navigator 3	1	5.9684	5.5134	6.77663	5.82216	6.07648	6.22566	6.28957	7.17624	6.02015	6.44199	1.07007	0.097707	0.0895005	0.0772398
sp|Q99832|TCPH_HUMAN	CCT7	TCPH_HUMAN T-complex protein 1 subunit eta	112	5.76093	5.81685	6.24022	6.23272	6.23947	6.1989	6.66309	6.63436	6.01268	6.43396	1.07006	0.0976977	0.043148	0.0386736
sp|Q99551|MTERF_HUMAN	MTERF	MTERF_HUMAN Transcription termination factor, mitochondrial	4	5.78173	5.47283	6.12598	6.52803	5.79998	6.53051	6.31987	6.93247	5.97714	6.39571	1.07003	0.097648	0.0759437	0.0737209
sp|Q6IBS0|TWF2_HUMAN	TWF2	TWF2_HUMAN Twinfilin-2	29	5.99569	5.95302	6.02552	6.21488	6.48779	6.40647	6.49441	6.4938	6.04728	6.47062	1.07001	0.0976176	0.0191207	0.00662521
sp|O75382|TRIM3_HUMAN	TRIM3	TRIM3_HUMAN Tripartite motif-containing protein 3	4	6.02257	5.97654	6.24829	6.18817	6.09213	6.59529	7.04276	6.41431	6.10889	6.53612	1.06994	0.0975242	0.0212774	0.0606959
sp|Q9NQG6|MID51_HUMAN	MIEF1	MID51_HUMAN Mitochondrial dynamics protein MID51	3	5.61051	5.59319	6.35897	6.77026	6.00309	5.86826	7.07246	7.09038	6.08323	6.50855	1.06992	0.0974975	0.0954595	0.101992
sp|Q5VST6-2|AB17B_HUMAN	ABHD17B	AB17B_HUMAN Isoform 2 of Alpha/beta hydrolase domain-containing protein 17B	5	5.66449	5.54822	6.30885	6.79069	6.19078	6.37347	6.72817	6.71802	6.07806	6.50261	1.06985	0.0974074	0.0955988	0.040803
sp|P26440|IVD_HUMAN	IVD	IVD_HUMAN Isovaleryl-CoA dehydrogenase, mitochondrial	16	6.00072	5.99151	5.72402	6.07052	6.16347	6.39054	6.49505	6.39676	5.94669	6.36146	1.06975	0.0972693	0.0256583	0.0220707
sp|Q96P53|WDFY2_HUMAN	WDFY2	WDFY2_HUMAN WD repeat and FYVE domain-containing protein 2	2	6.17835	5.77289	6.28693	7.46393	5.99423	6.73705	6.82806	7.93467	6.42553	6.8735	1.06972	0.0972311	0.113104	0.116385
sp|Q01518|CAP1_HUMAN	CAP1	CAP1_HUMAN Adenylyl cyclase-associated protein 1	48	6.01088	5.99033	5.90997	6.21843	6.3854	6.36238	6.59388	6.46987	6.0324	6.45288	1.0697	0.0972111	0.021789	0.016232
sp|Q9Y697|NFS1_HUMAN	NFS1	NFS1_HUMAN Cysteine desulfurase, mitochondrial	15	5.99903	5.72986	6.20253	6.21444	6.30131	6.48121	6.72747	6.31774	6.03646	6.45693	1.06965	0.097145	0.0376138	0.0306335
sp|O95758-4|PTBP3_HUMAN	PTBP3	PTBP3_HUMAN Isoform 4 of Polypyrimidine tract-binding protein 3	15	5.90073	6.12597	5.97715	5.98723	6.12613	6.68987	6.64221	6.2031	5.99777	6.41533	1.06962	0.0970967	0.0156371	0.0454922
sp|P24723|KPCL_HUMAN	PRKCH	KPCL_HUMAN Protein kinase C eta type	3	5.97118	5.98627	6.09566	6.28988	6.31072	5.88716	6.80645	7.03291	6.08575	6.50931	1.0696	0.0970701	0.0241479	0.0787828
sp|Q2TBE0|C19L2_HUMAN	CWF19L2	C19L2_HUMAN CWF19-like protein 2	3	6.1781	6.30008	6.48188	5.84009	6.74454	6.68655	6.24618	6.84765	6.20004	6.63123	1.06955	0.0969996	0.0436264	0.0399933
sp|Q86U06|RBM23_HUMAN	RBM23	RBM23_HUMAN Probable RNA-binding protein 23	4	6.02478	5.99854	6.38359	6.13194	6.38612	6.75633	6.59841	6.50357	6.13471	6.56111	1.06951	0.0969436	0.0286348	0.0238458
sp|Q92870-4|APBB2_HUMAN	APBB2	APBB2_HUMAN Isoform 4 of Amyloid beta A4 precursor protein-binding family B member 2	11	5.6042	5.9691	6.72183	6.47405	6.18373	6.43892	6.80977	7.05745	6.19229	6.62247	1.06947	0.0968947	0.0810392	0.0585132
sp|Q96HD1-2|CREL1_HUMAN	CRELD1	CREL1_HUMAN Isoform 2 of Cysteine-rich with EGF-like domain protein 1	4	6.15278	5.91724	6.0824	6.17067	6.75847	6.67485	6.02478	6.55458	6.08077	6.50317	1.06946	0.0968885	0.0189923	0.0507019
sp|Q01995|TAGL_HUMAN	TAGLN	TAGL_HUMAN Transgelin	9	6.19143	6.08586	6.07978	6.10603	6.23809	6.73092	6.61589	6.57716	6.11578	6.54052	1.06945	0.0968689	0.00844855	0.0324022
sp|Q96AB3-2|ISOC2_HUMAN	ISOC2	ISOC2_HUMAN Isoform 2 of Isochorismatase domain-containing protein 2, mitochondrial	3	6.55361	6.36882	6.3109	6.82679	8.38927	6.96255	6.20392	6.31117	6.51503	6.96673	1.06933	0.0967093	0.0356383	0.144381
sp|Q5JRX3-2|PREP_HUMAN	PITRM1	PREP_HUMAN Isoform 2 of Presequence protease, mitochondrial	48	5.84927	6.04043	6.07261	6.0915	6.23223	6.4872	6.63545	6.36644	6.01345	6.43033	1.06932	0.0966993	0.0185363	0.0267304
sp|Q9UIW2|PLXA1_HUMAN	PLXNA1	PLXA1_HUMAN Plexin-A1	21	5.65635	5.6204	6.60533	6.37552	6.10558	6.39992	6.66429	6.76911	6.0644	6.48473	1.06931	0.0966805	0.0826154	0.045751
sp|Q96EY5|MB12A_HUMAN	MVB12A	MB12A_HUMAN Multivesicular body subunit 12A	8	6.11888	5.54477	6.24953	6.42299	6.3498	6.2663	6.41026	6.99613	6.08404	6.50562	1.06929	0.0966569	0.0625377	0.0510772
sp|O75204|TM127_HUMAN	TMEM127	TM127_HUMAN Transmembrane protein 127	2	5.51755	5.5164	6.78026	6.46931	6.74666	5.71024	6.94291	6.56525	6.07088	6.49127	1.06925	0.096594	0.10741	0.0836573
sp|Q15007|FL2D_HUMAN	WTAP	FL2D_HUMAN Pre-mRNA-splicing regulator WTAP	5	5.80678	5.54421	6.90016	6.4508	6.58599	6.25052	6.60191	6.97337	6.17549	6.60295	1.06922	0.0965571	0.0996193	0.044731
sp|Q13287|NMI_HUMAN	NMI	NMI_HUMAN N-myc-interactor	8	5.66424	6.23498	6.21849	6.63723	6.17926	6.47678	6.90995	6.90074	6.18873	6.61668	1.06915	0.0964635	0.0645842	0.053619
sp|P30040|ERP29_HUMAN	ERP29	ERP29_HUMAN Endoplasmic reticulum resident protein 29	39	5.95097	5.88615	5.80658	6.0791	6.37319	6.2394	6.08646	6.66377	5.9307	6.3407	1.06913	0.0964409	0.019427	0.0386665
sp|Q8IWE5|PKHM2_HUMAN	PLEKHM2	PKHM2_HUMAN Pleckstrin homology domain-containing family M member 2	7	5.65009	5.89552	6.3402	6.34831	6.32342	6.39994	6.53383	6.65138	6.05853	6.47714	1.06909	0.0963897	0.0569151	0.022402
sp|Q9H2W6|RM46_HUMAN	MRPL46	RM46_HUMAN 39S ribosomal protein L46, mitochondrial	13	6.01949	6.00384	6.05335	6.41737	6.26435	6.26827	6.75675	6.89609	6.12351	6.54637	1.06905	0.0963346	0.0321697	0.0501574
sp|Q6ICG6|K0930_HUMAN	KIAA0930	K0930_HUMAN Uncharacterized protein KIAA0930	5	5.60372	5.92294	6.41116	6.38877	6.59244	6.01391	6.51232	6.88547	6.08165	6.50103	1.06896	0.0962072	0.0641418	0.055714
sp|P26196|DDX6_HUMAN	DDX6	DDX6_HUMAN Probable ATP-dependent RNA helicase DDX6	37	5.85119	5.80386	6.10282	6.18329	6.22184	6.26217	6.65996	6.44619	5.98529	6.39754	1.06888	0.0960961	0.0310955	0.0313175
sp|Q13555-6|KCC2G_HUMAN	CAMK2G	KCC2G_HUMAN Isoform 6 of Calcium/calmodulin-dependent protein kinase type II subunit gamma	12	5.84895	5.61682	6.05387	6.14821	6.03894	6.19062	6.65876	6.40835	5.91696	6.32417	1.06882	0.0960188	0.0398665	0.0426473
sp|Q96RU2|UBP28_HUMAN	USP28	UBP28_HUMAN Ubiquitin carboxyl-terminal hydrolase 28	6	5.86354	6.86369	5.88889	5.99369	5.7582	5.53963	6.36579	8.63943	6.15245	6.57576	1.0688	0.0959966	0.0776103	0.215866
sp|Q03154|ACY1_HUMAN	ACY1	ACY1_HUMAN Aminoacylase-1	15	6.04634	6.07371	6.03135	6.09874	6.22624	6.76069	6.76764	6.16399	6.06253	6.47964	1.0688	0.0959925	0.00492129	0.050857
sp|P10809|CH60_HUMAN	HSPD1	CH60_HUMAN 60 kDa heat shock protein, mitochondrial	298	5.79046	5.87233	6.09311	6.36118	6.14088	6.06541	6.72124	6.84741	6.02927	6.44373	1.06874	0.0959138	0.042383	0.0617395
sp|A6NNL5|CO061_HUMAN	C15orf61	CO061_HUMAN Uncharacterized protein C15orf61	1	5.90054	5.61648	6.08059	6.78118	6.08414	6.5917	6.74344	6.63515	6.0947	6.51361	1.06873	0.0959022	0.0813711	0.0450342
sp|Q9Y305-4|ACOT9_HUMAN	ACOT9	ACOT9_HUMAN Isoform 4 of Acyl-coenzyme A thioesterase 9, mitochondrial	16	5.85504	5.57528	6.14674	6.20899	6.11433	6.24701	6.71835	6.34095	5.94651	6.35516	1.06872	0.0958846	0.0490443	0.0408111
sp|Q9P2K6|KLH42_HUMAN	KLHL42	KLH42_HUMAN Kelch-like protein 42	4	5.62918	6.25516	6.07003	6.48266	6.16523	6.78483	6.45692	6.70896	6.10926	6.52899	1.0687	0.0958617	0.059224	0.0429002
sp|P21333|FLNA_HUMAN	FLNA	FLNA_HUMAN Filamin-A	169	5.98292	5.80605	6.07442	6.29994	6.29842	6.22273	6.46645	6.8357	6.04083	6.45582	1.0687	0.0958541	0.0340253	0.0422818
sp|Q9NYU2|UGGG1_HUMAN	UGGT1	UGGG1_HUMAN UDP-glucose:glycoprotein glucosyltransferase 1	66	5.82522	6.01841	6.14143	6.31966	6.31956	6.43896	6.57852	6.63729	6.07618	6.49358	1.06869	0.09585	0.0342408	0.0219834
sp|P41223|BUD31_HUMAN	BUD31	BUD31_HUMAN Protein BUD31 homolog	10	6.44216	6.26185	5.95916	5.61888	5.99121	6.39186	7.00674	6.56015	6.07051	6.48749	1.06869	0.0958421	0.0594785	0.0648096
sp|Q93062-3|RBPMS_HUMAN	RBPMS	RBPMS_HUMAN Isoform C of RNA-binding protein with multiple splicing	4	6.20913	6.25557	5.74697	5.92984	6.55199	6.67294	6.25686	6.31781	6.03538	6.4499	1.06868	0.0958328	0.0397876	0.0303397
sp|Q01831|XPC_HUMAN	XPC	XPC_HUMAN DNA repair protein complementing XP-C cells	3	5.45936	5.47838	6.40046	7.01057	6.313	6.22786	6.92826	6.54711	6.08719	6.50406	1.06848	0.095563	0.124231	0.0481796
sp|P19474|RO52_HUMAN	TRIM21	RO52_HUMAN E3 ubiquitin-protein ligase TRIM21	10	5.7247	5.80118	6.31721	6.47786	6.20891	6.10599	6.91606	6.7555	6.08024	6.49662	1.06848	0.0955605	0.0614309	0.0614625
sp|O75078|ADA11_HUMAN	ADAM11	ADA11_HUMAN Disintegrin and metalloproteinase domain-containing protein 11	1	6.22128	5.17167	6.64752	7.48693	6.49538	7.40933	7.34265	6.0267	6.38185	6.81851	1.06842	0.0954829	0.150897	0.0985703
sp|Q99967|CITE2_HUMAN	CITED2	CITE2_HUMAN Cbp/p300-interacting transactivator 2	1	6.48322	7.11267	5.58382	5.97379	6.7834	6.11494	8.03568	5.93982	6.28838	6.71846	1.06839	0.0954433	0.105196	0.141462
sp|Q6SJ93|F111B_HUMAN	FAM111B	F111B_HUMAN Protein FAM111B	5	6.10291	5.9021	6.38053	6.60589	6.58496	6.42607	6.95001	6.73957	6.24786	6.67515	1.06839	0.0954392	0.0494487	0.0334842
sp|Q8IY57|YAF2_HUMAN	YAF2	YAF2_HUMAN YY1-associated factor 2	1	5.4433	6.6831	6.10764	6.95016	6.34745	6.57384	6.83863	7.14657	6.29605	6.72662	1.06839	0.0954353	0.106165	0.0512126
sp|Q9Y666|S12A7_HUMAN	SLC12A7	S12A7_HUMAN Solute carrier family 12 member 7	13	5.68356	5.83228	6.19461	6.33427	6.14191	6.35242	6.61029	6.58442	6.01118	6.42226	1.06839	0.0954329	0.0505839	0.034247
sp|O75815|BCAR3_HUMAN	BCAR3	BCAR3_HUMAN Breast cancer anti-estrogen resistance protein 3	4	5.9196	5.61329	6.29779	6.67261	5.77316	6.17198	7.35598	6.87677	6.12582	6.54447	1.06834	0.0953733	0.0750308	0.108141
sp|Q86XP1|DGKH_HUMAN	DGKH	DGKH_HUMAN Diacylglycerol kinase eta	5	5.59532	5.47356	6.09877	6.76643	5.81472	6.08293	7.01112	6.66069	5.98352	6.39236	1.06833	0.0953553	0.0982584	0.0849323
sp|Q6P6B7|ANR16_HUMAN	ANKRD16	ANR16_HUMAN Ankyrin repeat domain-containing protein 16	3	5.61728	5.40274	6.22672	7.08095	6.09974	5.6509	7.40863	6.82967	6.08192	6.49723	1.06829	0.0952985	0.123634	0.11973
sp|Q8IWW6-3|RHG12_HUMAN	ARHGAP12	RHG12_HUMAN Isoform 3 of Rho GTPase-activating protein 12	28	5.86458	5.83555	6.09326	6.31986	6.41465	6.23087	6.45088	6.66271	6.02831	6.43978	1.06826	0.0952566	0.0374844	0.0275013
sp|Q02040|AK17A_HUMAN	AKAP17A	AK17A_HUMAN A-kinase anchor protein 17A	1	6.2086	5.59417	6.8698	6.21322	6.46367	6.31136	7.0369	6.7719	6.22145	6.64596	1.06823	0.0952268	0.0837296	0.0486704
sp|O96028|NSD2_HUMAN	WHSC1	NSD2_HUMAN Histone-lysine N-methyltransferase NSD2	2	6.25961	6.00569	6.12143	6.01549	6.19702	6.61198	6.17248	7.08451	6.10055	6.5165	1.06818	0.0951563	0.0193882	0.0658357
sp|Q9NZJ6|COQ3_HUMAN	COQ3	COQ3_HUMAN Hexaprenyldihydroxybenzoate methyltransferase, mitochondrial	4	5.72229	6.44463	6.30591	5.99589	6.48308	6.39089	6.60926	6.65309	6.11718	6.53408	1.06815	0.0951174	0.0528447	0.0183056
sp|Q9GZY4|COA1_HUMAN	COA1	COA1_HUMAN Cytochrome c oxidase assembly protein 1 homolog	4	5.09834	6.04437	6.26138	6.83344	6.15638	6.65529	5.85647	7.22123	6.05938	6.47234	1.06815	0.0951172	0.119152	0.0924199
sp|Q9NQG5|RPR1B_HUMAN	RPRD1B	RPR1B_HUMAN Regulation of nuclear pre-mRNA domain-containing protein 1B	10	5.98223	5.80745	6.46555	6.36213	6.48694	6.2603	6.69678	6.85085	6.15434	6.57372	1.06814	0.0951053	0.0505178	0.0390517
sp|Q8WV48|CC107_HUMAN	CCDC107	CC107_HUMAN Coiled-coil domain-containing protein 107	1	6.1656	6.5416	6.26753	6.05106	6.67369	7.79945	6.01659	6.24089	6.25645	6.68266	1.06812	0.0950777	0.033511	0.118652
sp|O00232|PSD12_HUMAN	PSMD12	PSD12_HUMAN 26S proteasome non-ATPase regulatory subunit 12	46	5.91273	5.88319	6.22012	6.33269	6.2428	6.40203	6.76456	6.59678	6.08718	6.50154	1.06807	0.0950074	0.0367332	0.0349725
sp|P33908|MA1A1_HUMAN	MAN1A1	MA1A1_HUMAN Mannosyl-oligosaccharide 1,2-alpha-mannosidase IA	11	5.83297	6.23727	6.27854	6.25148	6.24406	6.16197	6.82138	7.04651	6.15006	6.56848	1.06803	0.0949579	0.0344856	0.0659503
sp|P27986-4|P85A_HUMAN	PIK3R1	P85A_HUMAN Isoform 4 of Phosphatidylinositol 3-kinase regulatory subunit alpha	4	5.88149	5.78263	6.49456	6.32473	6.2976	6.31342	6.55787	6.97994	6.12085	6.53721	1.06802	0.0949419	0.0560352	0.0486895
sp|O15379|HDAC3_HUMAN	HDAC3	HDAC3_HUMAN Histone deacetylase 3	10	6.06274	5.77511	6.11161	6.34036	6.40576	6.36597	6.54524	6.62405	6.07245	6.48525	1.06798	0.0948834	0.0382458	0.0185486
sp|Q9NRZ9|HELLS_HUMAN	HELLS	HELLS_HUMAN Lymphoid-specific helicase	22	6.03208	5.78294	6.43611	6.52417	6.52452	6.44213	6.92144	6.57109	6.19383	6.61479	1.06797	0.0948658	0.0561468	0.0319389
sp|P13861|KAP2_HUMAN	PRKAR2A	KAP2_HUMAN cAMP-dependent protein kinase type II-alpha regulatory subunit	13	5.8438	5.72659	6.31497	6.33474	6.03179	5.83117	6.98753	7.01423	6.05502	6.46618	1.0679	0.0947808	0.0520773	0.0963355
sp|Q08431|MFGM_HUMAN	MFGE8	MFGM_HUMAN Lactadherin	2	5.7316	6.31963	5.79095	6.70178	6.28552	6.64199	6.63084	6.65053	6.13599	6.55222	1.06783	0.0946877	0.0750635	0.0271637
sp|Q12955|ANK3_HUMAN	ANK3	ANK3_HUMAN Ankyrin-3	18	5.84542	5.797	6.22864	6.49197	6.03248	6.43133	6.68338	6.86778	6.09076	6.50374	1.06781	0.0946485	0.0541611	0.0555889
sp|Q96S97|MYADM_HUMAN	MYADM	MYADM_HUMAN Myeloid-associated differentiation marker	7	5.88008	6.37586	6.39721	5.91381	6.61948	6.60688	6.86885	6.13618	6.14174	6.55785	1.06775	0.0945749	0.0461	0.0466468
sp|Q96FQ6|S10AG_HUMAN	S100A16	S10AG_HUMAN Protein S100-A16	11	6.02671	6.29335	5.86557	5.71712	5.99413	6.86302	6.82509	5.83978	5.97569	6.38051	1.06774	0.0945659	0.0412741	0.0845043
sp|Q7Z4H8|KDEL2_HUMAN	KDELC2	KDEL2_HUMAN KDEL motif-containing protein 2	14	5.84568	6.21833	6.16235	6.54754	6.13325	5.86757	7.20922	7.24189	6.19347	6.61298	1.06773	0.094552	0.0464143	0.108231
sp|Q15629|TRAM1_HUMAN	TRAM1	TRAM1_HUMAN Translocating chain-associated membrane protein 1	3	5.95696	5.5519	6.29334	6.33881	6.19678	6.7985	6.54679	6.23409	6.03525	6.44404	1.06773	0.0945513	0.0603902	0.0440214
sp|O43313|ATMIN_HUMAN	ATMIN	ATMIN_HUMAN ATM interactor	1	7.49461	5.82003	6.15684	5.45165	6.51613	7.5277	6.75644	5.80904	6.23078	6.65233	1.06766	0.0944458	0.142905	0.106535
sp|Q9UPY8|MARE3_HUMAN	MAPRE3	MARE3_HUMAN Microtubule-associated protein RP/EB family member 3	4	6.40203	5.98366	6.07129	5.95117	6.26642	6.32449	6.63678	6.83174	6.10204	6.51486	1.06765	0.0944426	0.0338132	0.0409232
sp|P23470|PTPRG_HUMAN	PTPRG	PTPRG_HUMAN Receptor-type tyrosine-protein phosphatase gamma	9	5.73535	5.70101	6.15974	6.62629	6.56859	6.34755	6.40168	6.53908	6.0556	6.46423	1.06748	0.0942081	0.0716539	0.0164737
sp|O43524|FOXO3_HUMAN	FOXO3	FOXO3_HUMAN Forkhead box protein O3	2	6.30827	6.78411	6.07237	6.10186	6.91718	6.98821	5.80874	7.25604	6.31665	6.74254	1.06742	0.0941325	0.0520584	0.0948315
sp|P82664|RT10_HUMAN	MRPS10	RT10_HUMAN 28S ribosomal protein S10, mitochondrial	11	5.88745	6.23803	6.0669	6.13456	6.38306	6.41818	6.6872	6.47639	6.08174	6.49121	1.06733	0.0940039	0.0242374	0.0209842
tr|H0YAR2|H0YAR2_HUMAN	PABPC1	H0YAR2_HUMAN Polyadenylate-binding protein 1 (Fragment)	3	6.19295	6.11584	5.78405	6.54662	6.32322	6.87116	6.80058	6.30188	6.15986	6.57421	1.06727	0.0939188	0.0508078	0.0461857
sp|O94855-2|SC24D_HUMAN	SEC24D	SC24D_HUMAN Isoform 2 of Protein transport protein Sec24D	22	5.74607	5.93653	6.12379	6.3932	5.92332	6.29845	6.88487	6.71998	6.0499	6.45665	1.06723	0.0938762	0.0456158	0.0670457
sp|Q16762|THTR_HUMAN	TST	THTR_HUMAN Thiosulfate sulfurtransferase	14	5.88943	6.22616	5.88791	6.06645	6.0137	6.43544	6.98858	6.24868	6.01749	6.4216	1.06716	0.0937716	0.0269896	0.0647048
sp|O75489|NDUS3_HUMAN	NDUFS3	NDUS3_HUMAN NADH dehydrogenase [ubiquinone] iron-sulfur protein 3, mitochondrial	11	5.84793	5.73075	6.46585	6.21782	6.29621	6.53852	6.55052	6.5058	6.06559	6.47276	1.06713	0.0937342	0.0557359	0.0184171
sp|O75054|IGSF3_HUMAN	IGSF3	IGSF3_HUMAN Immunoglobulin superfamily member 3	9	5.98526	6.2305	6.073	6.08252	6.34416	6.51549	6.51556	6.62983	6.09282	6.50126	1.06704	0.0936092	0.0166905	0.0181168
sp|O94923|GLCE_HUMAN	GLCE	GLCE_HUMAN D-glucuronyl C5-epimerase	6	5.70773	5.97421	6.64486	6.4948	6.1329	6.64454	7.04615	6.66157	6.2054	6.62129	1.06702	0.0935881	0.070735	0.0565897
sp|O95251|KAT7_HUMAN	KAT7	KAT7_HUMAN Histone acetyltransferase KAT7	2	5.99902	5.51569	6.58871	6.24685	6.75027	6.43875	6.10053	6.69116	6.08757	6.49518	1.06696	0.0935031	0.074158	0.0455345
sp|Q9Y4X0|AMMR1_HUMAN	AMMECR1	AMMR1_HUMAN AMME syndrome candidate gene 1 protein	4	5.54308	5.52418	5.8166	6.38	6.12197	5.78226	6.65718	6.25978	5.81597	6.2053	1.06694	0.0934818	0.0686141	0.0583327
sp|P43405|KSYK_HUMAN	SYK	KSYK_HUMAN Tyrosine-protein kinase SYK	4	5.90827	6.06193	6.05944	6.3116	6.90408	6.37626	6.37239	6.31736	6.08531	6.49252	1.06692	0.0934483	0.0274594	0.0424623
sp|Q9H4A5|GLP3L_HUMAN	GOLPH3L	GLP3L_HUMAN Golgi phosphoprotein 3-like	3	5.78558	5.61969	6.46085	6.57738	6.25563	6.33713	6.57179	6.9142	6.11088	6.51969	1.0669	0.0934238	0.0783202	0.0452764
sp|Q9BZV1|UBXN6_HUMAN	UBXN6	UBXN6_HUMAN UBX domain-containing protein 6	5	5.50283	5.26382	6.33622	6.47981	6.29156	5.9458	6.00497	6.91683	5.89567	6.28979	1.06685	0.0933561	0.102186	0.0706637
sp|Q96AJ1|CLUA1_HUMAN	CLUAP1	CLUA1_HUMAN Clusterin-associated protein 1	1	5.5317	6.36557	6.11807	6.68541	6.49263	7.14349	6.8369	5.87635	6.17519	6.58734	1.06674	0.0932136	0.0789971	0.0825013
sp|Q7L0Y3|MRRP1_HUMAN	TRMT10C	MRRP1_HUMAN Mitochondrial ribonuclease P protein 1	28	5.93038	5.71303	6.25096	6.41851	6.37399	6.47518	6.47733	6.60909	6.07822	6.4839	1.06674	0.0932124	0.0521006	0.0148658
sp|Q9H5K3|SG196_HUMAN	POMK	SG196_HUMAN Protein O-mannose kinase	8	5.86132	5.92837	6.13064	6.58364	6.44404	6.40756	6.37904	6.90734	6.12599	6.53449	1.06668	0.0931321	0.0531942	0.0382559
sp|P12277|KCRB_HUMAN	CKB	KCRB_HUMAN Creatine kinase B-type	79	6.12653	6.01491	6.04747	5.97022	6.09415	6.06405	6.22412	7.38774	6.03978	6.44252	1.06668	0.0931274	0.0109166	0.0984036
sp|Q9P0W2|HM20B_HUMAN	HMG20B	HM20B_HUMAN SWI/SNF-related matrix-associated actin-dependent regulator of chromatin subfamily E member 1-related	2	5.78501	5.80282	6.11798	5.87363	5.82173	6.55166	6.87941	5.89746	5.89486	6.28756	1.06662	0.0930439	0.0260553	0.0815743
sp|Q8TD55|PKHO2_HUMAN	PLEKHO2	PKHO2_HUMAN Pleckstrin homology domain-containing family O member 2	2	6.31838	5.81409	6.03141	6.32807	6.65372	6.34962	6.36297	6.75689	6.12299	6.5308	1.0666	0.093024	0.0404514	0.0315318
sp|Q9UIF7|MUTYH_HUMAN	MUTYH	MUTYH_HUMAN A/G-specific adenine DNA glycosylase	4	5.85923	5.6967	6.36684	6.59826	6.38036	6.37363	6.69737	6.70264	6.13026	6.5385	1.06659	0.093012	0.0689788	0.0285268
sp|P12081|SYHC_HUMAN	HARS	SYHC_HUMAN Histidine--tRNA ligase, cytoplasmic	60	5.7727	6.00655	6.15524	6.26934	6.20308	6.21597	6.6776	6.71871	6.05096	6.45384	1.06658	0.0929944	0.0354405	0.0437969
sp|Q9Y5T4|DJC15_HUMAN	DNAJC15	DJC15_HUMAN DnaJ homolog subfamily C member 15	4	5.82602	6.00473	6.26441	6.29851	6.28761	6.41262	6.64827	6.66818	6.09842	6.50417	1.06653	0.09293	0.0367358	0.0284805
sp|Q9Y5Q0|FADS3_HUMAN	FADS3	FADS3_HUMAN Fatty acid desaturase 3	2	5.94341	5.80687	6.11334	6.39825	6.09609	6.48148	6.6347	6.66331	6.06547	6.46889	1.06651	0.0929004	0.0420124	0.0403536
sp|Q659C4|LAR1B_HUMAN	LARP1B	LAR1B_HUMAN La-related protein 1B	3	5.4945	6.03461	6.69476	6.34378	5.96796	6.7065	6.19965	7.32687	6.14191	6.55025	1.06648	0.0928609	0.0828628	0.0920031
sp|Q32P41|TRM5_HUMAN	TRMT5	TRM5_HUMAN tRNA (guanine(37)-N1)-methyltransferase	20	5.79976	5.67754	6.34112	6.34524	6.23894	6.14845	6.62177	6.7589	6.04092	6.44202	1.0664	0.0927449	0.058365	0.0457117
sp|P86791|CCZ1_HUMAN	CCZ1	CCZ1_HUMAN Vacuolar fusion protein CCZ1 homolog	14	5.78247	5.61194	6.27219	6.47903	6.24371	6.20155	6.56536	6.73794	6.03641	6.43714	1.06639	0.0927296	0.0673711	0.0400946
sp|Q96DX4|RSPRY_HUMAN	RSPRY1	RSPRY_HUMAN RING finger and SPRY domain-containing protein 1	1	5.23467	5.74624	6.78968	6.58083	7.00091	5.92603	6.27003	6.76886	6.08786	6.49146	1.0663	0.0926084	0.119215	0.0746901
sp|Q9Y5L3|ENTP2_HUMAN	ENTPD2	ENTP2_HUMAN Ectonucleoside triphosphate diphosphohydrolase 2	2	5.92811	6.79077	6.29084	5.39946	6.25148	6.57064	6.82007	6.38416	6.1023	6.50659	1.06625	0.0925492	0.0962006	0.0379008
sp|Q15041|AR6P1_HUMAN	ARL6IP1	AR6P1_HUMAN ADP-ribosylation factor-like protein 6-interacting protein 1	2	7.06761	5.58467	6.09704	5.64138	6.31269	5.90795	6.30415	7.48168	6.09768	6.50162	1.06625	0.0925394	0.112516	0.104606
sp|P31431|SDC4_HUMAN	SDC4	SDC4_HUMAN Syndecan-4	2	5.56925	5.58494	6.72202	6.98756	6.29639	6.83838	6.65164	6.72437	6.21594	6.6277	1.06624	0.0925341	0.119954	0.0352852
sp|Q9P1Q0|VPS54_HUMAN	VPS54	VPS54_HUMAN Vacuolar protein sorting-associated protein 54	1	5.57552	5.08481	6.55078	7.68163	6.78427	5.86046	5.86606	8.03013	6.22318	6.63523	1.06621	0.0924933	0.184379	0.154674
tr|H3BQF6|H3BQF6_HUMAN		H3BQF6_HUMAN Uncharacterized protein (Fragment)	1	5.47793	5.386	5.69368	6.34782	6.41263	5.8053	5.74783	6.4562	5.72636	6.10549	1.06621	0.0924893	0.0757748	0.0623946
sp|Q676U5|A16L1_HUMAN	ATG16L1	A16L1_HUMAN Autophagy-related protein 16-1	18	6.0074	6.00632	6.14161	6.18564	6.63728	6.23414	6.5961	6.48468	6.08524	6.48805	1.06619	0.0924702	0.0151641	0.0279177
sp|Q92993-3|KAT5_HUMAN	KAT5	KAT5_HUMAN Isoform 3 of Histone acetyltransferase KAT5	3	6.25606	5.34295	6.15756	7.33878	6.27966	6.70855	6.97947	6.78754	6.27384	6.6888	1.06614	0.0924003	0.130614	0.0441836
sp|Q3MIN7-2|RGL3_HUMAN	RGL3	RGL3_HUMAN Isoform 2 of Ral guanine nucleotide dissociation stimulator-like 3	2	5.65433	6.7545	6.26309	6.4475	6.27398	5.77955	7.61613	7.11058	6.27985	6.69506	1.06612	0.0923657	0.0738337	0.123063
sp|Q96C86|DCPS_HUMAN	DCPS	DCPS_HUMAN m7GpppX diphosphatase	10	6.03466	6.22351	5.91953	6.23029	6.38869	6.45356	6.74301	6.43555	6.102	6.5052	1.06608	0.0923124	0.0248633	0.0247308
sp|P47897|SYQ_HUMAN	QARS	SYQ_HUMAN Glutamine--tRNA ligase	56	5.66601	5.61787	6.23358	6.28597	6.09985	6.23984	6.59125	6.4448	5.95086	6.34394	1.06605	0.0922804	0.0601406	0.0342645
sp|Q8NDA8|MROH1_HUMAN	MROH1	MROH1_HUMAN Maestro heat-like repeat-containing protein family member 1	3	5.40809	5.79594	6.30483	6.60509	5.91545	6.40979	6.60097	6.78026	6.02849	6.42662	1.06604	0.0922635	0.0881819	0.0580155
sp|Q8NC06-2|ACBD4_HUMAN	ACBD4	ACBD4_HUMAN Isoform 2 of Acyl-CoA-binding domain-containing protein 4	1	5.57361	6.24314	6.0674	6.38333	6.73451	5.90583	6.7302	6.49908	6.06687	6.4674	1.06602	0.0922346	0.0582391	0.0603338
sp|Q12874|SF3A3_HUMAN	SF3A3	SF3A3_HUMAN Splicing factor 3A subunit 3	22	5.94201	5.61994	6.11974	6.52749	6.22069	6.02164	6.81137	6.75293	6.05229	6.45166	1.06599	0.0921875	0.062514	0.0605898
sp|Q32M88|ATHL1_HUMAN	ATHL1	ATHL1_HUMAN Acid trehalase-like protein 1	4	5.83443	5.57366	6.40064	6.34433	5.97906	6.38707	6.42033	6.9583	6.03826	6.43619	1.0659	0.0920728	0.0664095	0.0624219
sp|Q8WUM0|NU133_HUMAN	NUP133	NU133_HUMAN Nuclear pore complex protein Nup133	21	5.77654	5.5891	6.4685	6.46806	6.2813	6.41599	6.69009	6.5161	6.07555	6.47587	1.06589	0.092059	0.0756963	0.02659
sp|P51809|VAMP7_HUMAN	VAMP7	VAMP7_HUMAN Vesicle-associated membrane protein 7	10	5.843	5.98774	6.20186	6.36042	6.27723	6.30572	6.62262	6.79415	6.09825	6.49993	1.06587	0.0920277	0.0374932	0.0386085
sp|Q9HAP2|MLXIP_HUMAN	MLXIP	MLXIP_HUMAN MLX-interacting protein	1	5.46978	6.12898	6.18131	6.03439	6.00312	6.6073	6.21906	6.55357	5.95362	6.34576	1.06587	0.0920276	0.0551324	0.0450378
sp|Q8WV22|NSE1_HUMAN	NSMCE1	NSE1_HUMAN Non-structural maintenance of chromosomes element 1 homolog	2	6.65298	6.00015	5.70843	6.35376	6.05467	6.67778	6.92217	6.68781	6.17883	6.58561	1.06583	0.0919828	0.0666393	0.0564159
sp|Q9Y3V2|RWDD3_HUMAN	RWDD3	RWDD3_HUMAN RWD domain-containing protein 3	1	6.04086	5.86696	6.28276	6.79223	6.01275	6.83054	7.00788	6.77582	6.2457	6.65675	1.06581	0.0919536	0.064408	0.0661898
sp|Q6NUK1|SCMC1_HUMAN	SLC25A24	SCMC1_HUMAN Calcium-binding mitochondrial carrier protein SCaMC-1	23	5.73271	5.67494	6.61644	6.60573	6.38213	6.31737	7.06848	6.48158	6.15746	6.56239	1.06576	0.0918872	0.0851579	0.0524331
sp|Q9Y2L1|RRP44_HUMAN	DIS3	RRP44_HUMAN Exosome complex exonuclease RRP44	44	5.91373	5.80149	6.17663	6.36786	6.30283	6.23808	6.58632	6.72678	6.06493	6.4635	1.06572	0.0918258	0.0421989	0.0358447
sp|Q9Y6J9|TAF6L_HUMAN	TAF6L	TAF6L_HUMAN TAF6-like RNA polymerase II p300/CBP-associated factor-associated factor 65 kDa subunit 6L	2	6.7175	5.60968	6.33233	5.68864	6.70895	6.41993	6.24921	6.56991	6.08704	6.487	1.06571	0.0918112	0.0871499	0.0304663
sp|Q96Q05-2|TPPC9_HUMAN	TRAPPC9	TPPC9_HUMAN Isoform 2 of Trafficking protein particle complex subunit 9	8	6.07322	6.10998	6.00621	6.21741	6.15551	6.54059	6.58721	6.72688	6.1017	6.50255	1.06569	0.0917926	0.0144702	0.0376042
sp|P04844|RPN2_HUMAN	RPN2	RPN2_HUMAN Dolichyl-diphosphooligosaccharide--protein glycosyltransferase subunit 2	29	5.79877	5.85337	6.2161	6.32256	6.13697	6.42264	6.63507	6.58498	6.0477	6.44491	1.06568	0.0917748	0.0430802	0.0348225
tr|G3V119|G3V119_HUMAN	CCAR2	G3V119_HUMAN Cell cycle and apoptosis regulator protein 2	1	6.96245	7.135	6.11178	4.26599	6.52614	4.68072	7.51032	7.36487	6.11881	6.52051	1.06565	0.0917354	0.214698	0.199519
sp|Q7L273|KCTD9_HUMAN	KCTD9	KCTD9_HUMAN BTB/POZ domain-containing protein KCTD9	13	5.91551	5.94908	6.10175	6.18844	6.56952	6.23665	6.35444	6.57903	6.03869	6.43491	1.06561	0.0916832	0.0212941	0.0261077
sp|O43815|STRN_HUMAN	STRN	STRN_HUMAN Striatin	27	5.87332	5.91076	6.21483	6.57151	6.41318	6.37144	6.71183	6.68569	6.1426	6.54554	1.0656	0.0916605	0.0527894	0.0272045
sp|Q9H000|MKRN2_HUMAN	MKRN2	MKRN2_HUMAN Probable E3 ubiquitin-protein ligase makorin-2	5	6.35955	6.08611	6.40372	5.72549	6.63119	6.60569	6.46766	6.48192	6.14372	6.54662	1.06558	0.0916373	0.0508171	0.0127989
sp|Q86XK2-5|FBX11_HUMAN	FBXO11	FBX11_HUMAN Isoform 5 of F-box only protein 11	4	6.29527	5.79052	5.93463	6.40747	6.21665	6.34976	6.84001	6.62282	6.10697	6.50731	1.06555	0.0916039	0.0477961	0.0428578
sp|P10586|PTPRF_HUMAN	PTPRF	PTPRF_HUMAN Receptor-type tyrosine-protein phosphatase F	21	5.73301	5.96351	6.07275	6.58734	6.09665	6.34293	6.82562	6.68545	6.08915	6.48766	1.06545	0.0914573	0.0592949	0.0509026
sp|P30038|AL4A1_HUMAN	ALDH4A1	AL4A1_HUMAN Delta-1-pyrroline-5-carboxylate dehydrogenase, mitochondrial	9	6.25084	5.9444	5.70896	6.36525	6.54997	5.98381	6.40504	6.91796	6.06736	6.4642	1.0654	0.0914012	0.0490748	0.0597497
sp|P11310-2|ACADM_HUMAN	ACADM	ACADM_HUMAN Isoform 2 of Medium-chain specific acyl-CoA dehydrogenase, mitochondrial	20	6.01386	6.34125	5.88209	5.96737	6.43802	6.59392	6.41762	6.33646	6.05114	6.4465	1.06534	0.0913096	0.0332095	0.0166946
sp|Q9UM11|FZR_HUMAN	FZR1	FZR_HUMAN Fizzy-related protein homolog	2	5.95712	5.60968	5.80296	6.76352	6.09175	6.10039	6.57223	6.94518	6.03332	6.42739	1.06532	0.0912804	0.0840545	0.0640652
sp|P53618|COPB_HUMAN	COPB1	COPB_HUMAN Coatomer subunit beta	51	5.89412	5.74635	6.50499	6.37896	6.35242	6.48029	6.82145	6.47065	6.1311	6.5312	1.06526	0.0912015	0.0599589	0.0309352
sp|Q96S16|JMJD8_HUMAN	JMJD8	JMJD8_HUMAN JmjC domain-containing protein 8	1	6.34306	6.20044	6.35323	5.87463	6.10984	6.49841	6.86748	6.91194	6.19284	6.59692	1.06525	0.0911909	0.0360599	0.0566772
sp|O60610|DIAP1_HUMAN	DIAPH1	DIAP1_HUMAN Protein diaphanous homolog 1	57	5.83113	5.89714	6.27005	6.42734	6.26811	6.34223	6.58345	6.82533	6.10642	6.50478	1.06524	0.0911746	0.0472123	0.0388285
sp|P55769|NH2L1_HUMAN	NHP2L1	NH2L1_HUMAN NHP2-like protein 1	6	5.7271	5.62512	5.68731	5.80968	6.02605	6.36435	5.96509	5.98274	5.7123	6.08456	1.06517	0.09108	0.0135325	0.0309436
sp|Q9Y6W5|WASF2_HUMAN	WASF2	WASF2_HUMAN Wiskott-Aldrich syndrome protein family member 2	9	6.10536	6.07738	5.94658	6.18342	6.25271	6.51543	6.49073	6.63783	6.07818	6.47418	1.06515	0.0910558	0.0162129	0.0248749
sp|Q3LXA3|DHAK_HUMAN	DAK	DHAK_HUMAN Bifunctional ATP-dependent dihydroxyacetone kinase/FAD-AMP lyase (cyclizing)	31	5.953	5.86794	6.04222	6.2911	6.29363	6.3986	6.43762	6.59784	6.03857	6.43192	1.06514	0.0910443	0.0302682	0.0196244
sp|Q9NPI0|TM138_HUMAN	TMEM138	TM138_HUMAN Transmembrane protein 138	1	5.62834	6.21798	4.99529	7.27749	5.34094	6.00947	7.34345	6.99423	6.02977	6.42202	1.06505	0.0909236	0.160892	0.142584
sp|P27037|AVR2A_HUMAN	ACVR2A	AVR2A_HUMAN Activin receptor type-2A	1	6.57862	5.19125	5.44869	6.69505	6.5661	6.39973	6.81582	5.68445	5.9784	6.36652	1.06492	0.0907461	0.128628	0.0763064
sp|Q86WA6|BPHL_HUMAN	BPHL	BPHL_HUMAN Valacyclovir hydrolase	12	5.94397	6.53724	6.18758	6.15846	6.39908	6.54984	6.55416	6.93502	6.20681	6.60952	1.06488	0.090694	0.0395714	0.0345961
sp|Q9NVG8|TBC13_HUMAN	TBC1D13	TBC13_HUMAN TBC1 domain family member 13	2	5.62733	6.12014	6.04006	6.72222	5.92473	6.33918	6.87011	6.96596	6.12744	6.52499	1.06488	0.0906929	0.0736853	0.0744729
sp|O14735|CDIPT_HUMAN	CDIPT	CDIPT_HUMAN CDP-diacylglycerol--inositol 3-phosphatidyltransferase	4	5.76148	5.75837	6.44203	6.17386	6.01996	6.24083	6.57021	6.86945	6.03394	6.42511	1.06483	0.0906226	0.0554874	0.0579985
sp|P16278|BGAL_HUMAN	GLB1	BGAL_HUMAN Beta-galactosidase	19	5.98051	6.30863	6.13498	6.24482	6.52694	6.20037	6.6443	6.89587	6.16723	6.56687	1.0648	0.0905821	0.0232948	0.0439728
sp|Q12882|DPYD_HUMAN	DPYD	DPYD_HUMAN Dihydropyrimidine dehydrogenase [NADP(+)]	1	5.41691	6.20269	6.50347	6.35757	6.71157	7.80893	6.23609	5.30777	6.12016	6.51609	1.06469	0.0904372	0.0791894	0.159686
sp|O00522|KRIT1_HUMAN	KRIT1	KRIT1_HUMAN Krev interaction trapped protein 1	2	5.83541	5.68116	6.61306	6.23688	6.76958	6.15123	6.4149	6.60631	6.09163	6.4855	1.06466	0.0903912	0.0688115	0.0409903
sp|Q13905-3|RPGF1_HUMAN	RAPGEF1	RPGF1_HUMAN Isoform 3 of Rap guanine nucleotide exchange factor 1	5	6.21537	6.85838	5.48492	5.75071	5.44862	5.4285	8.43421	6.56742	6.07734	6.46969	1.06456	0.0902548	0.0990342	0.21851
sp|O94953|KDM4B_HUMAN	KDM4B	KDM4B_HUMAN Lysine-specific demethylase 4B	7	5.76463	5.59826	6.21299	6.17088	5.91108	6.37092	6.37052	6.62661	5.93669	6.31978	1.06453	0.0902161	0.0510292	0.0471498
sp|Q7L9L4-2|MOB1B_HUMAN	MOB1B	MOB1B_HUMAN Isoform 2 of MOB kinase activator 1B	10	5.94327	6.10408	6.12111	6.22811	6.39395	6.48275	6.47562	6.61828	6.09914	6.49265	1.06452	0.090201	0.019269	0.0143144
sp|Q9Y6M9|NDUB9_HUMAN	NDUFB9	NDUB9_HUMAN NADH dehydrogenase [ubiquinone] 1 beta subcomplex subunit 9	12	5.77582	5.80473	6.07844	6.35451	6.24296	5.85867	6.5412	6.91954	6.00338	6.39059	1.0645	0.0901759	0.0451258	0.0703989
sp|Q96NT0|CC115_HUMAN	CCDC115	CC115_HUMAN Coiled-coil domain-containing protein 115	3	5.82835	6.02066	6.01416	6.36478	5.99232	6.5401	6.65298	6.60458	6.05699	6.44749	1.06447	0.0901383	0.0369375	0.047608
sp|Q8IU85|KCC1D_HUMAN	CAMK1D	KCC1D_HUMAN Calcium/calmodulin-dependent protein kinase type 1D	8	5.78275	6.6847	5.89926	6.22673	5.99921	6.63419	6.97557	6.56958	6.14836	6.54464	1.06445	0.0901116	0.0657003	0.0618677
sp|Q93084-5|AT2A3_HUMAN	ATP2A3	AT2A3_HUMAN Isoform SERCA3E of Sarcoplasmic/endoplasmic reticulum calcium ATPase 3	15	5.50957	5.46286	5.9025	6.0257	5.91315	6.64305	6.10951	5.71002	5.72516	6.09393	1.06441	0.0900581	0.0490993	0.065765
sp|Q8WU17|RN139_HUMAN	RNF139	RN139_HUMAN E3 ubiquitin-protein ligase RNF139	3	5.76569	5.77696	6.58583	5.95755	6.13514	6.97127	6.43826	6.0927	6.02151	6.40934	1.06441	0.0900517	0.0641615	0.0631873
sp|Q13451|FKBP5_HUMAN	FKBP5	FKBP5_HUMAN Peptidyl-prolyl cis-trans isomerase FKBP5	32	5.86907	5.75571	6.09866	6.39899	6.2264	6.20774	6.6555	6.58524	6.03061	6.41872	1.06436	0.0899823	0.0470962	0.0365695
sp|Q8N983-4|RM43_HUMAN	MRPL43	RM43_HUMAN Isoform 4 of 39S ribosomal protein L43, mitochondrial	12	5.8896	5.845	6.06487	6.53072	6.40726	6.11347	6.56963	6.8038	6.08255	6.47354	1.06428	0.0898792	0.0515393	0.044802
sp|Q8IXJ6|SIR2_HUMAN	SIRT2	SIR2_HUMAN NAD-dependent protein deacetylase sirtuin-2	6	5.65923	6.19696	6.20968	6.35735	6.42566	6.19007	6.53143	6.84384	6.10581	6.49775	1.06419	0.0897587	0.050196	0.0417497
sp|Q96D53|ADCK4_HUMAN	ADCK4	ADCK4_HUMAN Uncharacterized aarF domain-containing protein kinase 4	3	5.83807	5.64204	7.3595	6.47395	6.11047	6.69164	7.09942	7.036	6.32839	6.73438	1.06415	0.0897072	0.12226	0.0672499
sp|P27144|KAD4_HUMAN	AK4	KAD4_HUMAN Adenylate kinase 4, mitochondrial	16	5.97164	5.67415	6.15101	6.42517	6.10676	6.13064	6.78538	6.75201	6.05549	6.4437	1.06411	0.0896445	0.0520681	0.058297
sp|O60293|ZC3H1_HUMAN	ZFC3H1	ZC3H1_HUMAN Zinc finger C3H1 domain-containing protein	3	5.18209	5.89555	7.02328	6.32813	7.02599	6.09583	6.90873	5.96395	6.10726	6.49862	1.06408	0.0896086	0.126431	0.0840212
sp|Q16851|UGPA_HUMAN	UGP2	UGPA_HUMAN UTP--glucose-1-phosphate uridylyltransferase	29	5.73016	5.94494	6.24663	6.30147	6.1974	6.35582	6.68186	6.54002	6.0558	6.44378	1.06407	0.0895886	0.044217	0.0328453
sp|P22033|MUTA_HUMAN	MUT	MUTA_HUMAN Methylmalonyl-CoA mutase, mitochondrial	26	5.84896	6.11719	6.2896	6.30467	6.42521	6.55202	6.55852	6.59799	6.14011	6.53343	1.06406	0.0895784	0.0345129	0.0114725
sp|O43847-2|NRDC_HUMAN	NRD1	NRDC_HUMAN Isoform 2 of Nardilysin	38	5.94588	5.89386	6.16064	6.33938	6.00414	6.13666	6.93429	6.82324	6.08494	6.47458	1.06403	0.0895441	0.0337224	0.0729031
sp|P52306-5|GDS1_HUMAN	RAP1GDS1	GDS1_HUMAN Isoform 5 of Rap1 GTPase-GDP dissociation stimulator 1	29	6.04732	5.80081	6.52397	6.22599	6.27489	6.01791	7.00668	6.87297	6.14952	6.54311	1.064	0.0895027	0.049511	0.0723056
sp|Q0VAQ4|SMAGP_HUMAN	SMAGP	SMAGP_HUMAN Small cell adhesion glycoprotein	1	6.05532	6.23318	5.65594	6.89473	5.8491	8.28322	6.5424	5.75029	6.20979	6.60625	1.06384	0.0892871	0.0831742	0.17744
sp|P56545-2|CTBP2_HUMAN	CTBP2	CTBP2_HUMAN Isoform 2 of C-terminal-binding protein 2	14	5.77853	5.85783	5.84076	6.19954	5.83471	5.84639	7.11338	6.39077	5.91916	6.29631	1.06372	0.0891135	0.0320988	0.0958231
sp|Q8N9E0|F133A_HUMAN	FAM133A	F133A_HUMAN Protein FAM133A	2	6.81076	5.98303	5.67622	5.77218	6.89578	7.23866	5.82989	5.8224	6.06055	6.44668	1.06371	0.0891088	0.08519	0.11325
sp|Q8ND04-2|SMG8_HUMAN	SMG8	SMG8_HUMAN Isoform 2 of Protein SMG8	17	5.82401	5.61779	6.43874	6.56961	6.30767	6.01205	6.76162	6.92588	6.11254	6.50181	1.06368	0.0890689	0.0757601	0.064334
sp|O60506-3|HNRPQ_HUMAN	SYNCRIP	HNRPQ_HUMAN Isoform 3 of Heterogeneous nuclear ribonucleoprotein Q	2	5.80662	6.04167	6.5848	6.2507	6.13954	6.43366	7.11386	6.56864	6.17095	6.56392	1.06368	0.0890667	0.0535076	0.062166
sp|Q96IV0|NGLY1_HUMAN	NGLY1	NGLY1_HUMAN Peptide-N(4)-(N-acetyl-beta-glucosaminyl)asparagine amidase	7	6.07242	6.01268	6.16392	6.27699	6.65838	6.0375	6.8662	6.52563	6.1315	6.52193	1.06368	0.0890578	0.0187915	0.0539801
sp|P80217-2|IN35_HUMAN	IFI35	IN35_HUMAN Isoform 2 of Interferon-induced 35 kDa protein	6	5.87213	6.25797	5.75528	6.55742	6.34708	6.29952	6.40654	6.94605	6.1107	6.4998	1.06367	0.0890571	0.0600897	0.0462639
sp|Q12766|HMGX3_HUMAN	HMGXB3	HMGX3_HUMAN HMG domain-containing protein 3	4	6.15024	5.82608	6.22493	6.23121	5.64286	6.79982	7.12561	6.41988	6.10812	6.49704	1.06367	0.0890559	0.0313659	0.0982476
sp|Q13769|THOC5_HUMAN	THOC5	THOC5_HUMAN THO complex subunit 5 homolog	9	6.26739	5.95754	6.31344	6.22782	6.60854	6.6823	6.5872	6.46491	6.19155	6.58574	1.06367	0.089045	0.0258223	0.0137068
sp|Q12792|TWF1_HUMAN	TWF1	TWF1_HUMAN Twinfilin-1	19	5.84213	5.97007	6.37081	6.34466	6.29807	6.23812	6.68631	6.86633	6.13192	6.52221	1.06365	0.0890221	0.0434033	0.0465297
sp|Q9H0U6|RM18_HUMAN	MRPL18	RM18_HUMAN 39S ribosomal protein L18, mitochondrial	4	6.15926	6.44357	5.97836	6.15174	6.45779	7.1276	6.23186	6.48946	6.18323	6.57668	1.06363	0.0889977	0.031153	0.058506
sp|Q9HCN4|GPN1_HUMAN	GPN1	GPN1_HUMAN GPN-loop GTPase 1	8	6.08141	5.94914	6.23103	6.44134	6.37926	6.21663	6.56914	7.10969	6.17573	6.56868	1.06363	0.0889938	0.0342022	0.0591256
sp|Q9UBU9|NXF1_HUMAN	NXF1	NXF1_HUMAN Nuclear RNA export factor 1	13	5.74059	6.10492	6.13359	6.16378	6.44774	5.97028	6.73525	6.5251	6.03572	6.41959	1.0636	0.0889558	0.0328404	0.0503516
sp|Q9Y3I1|FBX7_HUMAN	FBXO7	FBX7_HUMAN F-box only protein 7	9	5.86215	5.75841	6.447	6.26327	6.3938	6.34189	6.65796	6.48366	6.08271	6.46933	1.06356	0.0889021	0.0536196	0.0214432
sp|Q9BY44|EIF2A_HUMAN	EIF2A	EIF2A_HUMAN Eukaryotic translation initiation factor 2A	28	6.00236	5.93834	6.36275	6.35888	6.42841	6.49833	6.72638	6.57656	6.16558	6.55742	1.06355	0.0888911	0.0368093	0.0194994
sp|Q03518|TAP1_HUMAN	TAP1	TAP1_HUMAN Antigen peptide transporter 1	8	5.59763	5.66779	6.67139	6.48366	6.32116	6.11983	6.83	6.69883	6.10512	6.49245	1.06344	0.088745	0.090349	0.0506739
sp|Q68CQ4|DIEXF_HUMAN	DIEXF	DIEXF_HUMAN Digestive organ expansion factor homolog	8	5.74188	5.8505	6.37926	6.66822	6.57285	5.66662	6.82932	7.134	6.15996	6.5507	1.06343	0.0887264	0.0711935	0.096546
sp|Q6NYC1-3|JMJD6_HUMAN	JMJD6	JMJD6_HUMAN Isoform 3 of Bifunctional arginine demethylase and lysyl-hydroxylase JMJD6	14	5.80646	5.8014	6.27298	6.416	6.15185	6.2918	6.57664	6.81746	6.07421	6.45944	1.06342	0.0887118	0.0522725	0.0459794
sp|Q86YR5|GPSM1_HUMAN	GPSM1	GPSM1_HUMAN G-protein-signaling modulator 1	7	5.74001	5.66098	6.54197	6.47706	5.84982	5.9537	7.10135	7.06355	6.10501	6.49211	1.06341	0.0886939	0.0768141	0.10523
sp|Q969G3|SMCE1_HUMAN	SMARCE1	SMCE1_HUMAN SWI/SNF-related matrix-associated actin-dependent regulator of chromatin subfamily E member 1	12	6.12484	6.03228	6.03026	6.21883	6.2957	6.48824	6.65822	6.51143	6.10155	6.4884	1.0634	0.0886858	0.0147132	0.0229467
sp|O60282|KIF5C_HUMAN	KIF5C	KIF5C_HUMAN Kinesin heavy chain isoform 5C	4	5.90625	5.95352	6.4639	6.57759	6.34026	6.36152	6.85612	6.92196	6.22532	6.61997	1.06339	0.0886768	0.0553894	0.0471275
sp|P78347|GTF2I_HUMAN	GTF2I	GTF2I_HUMAN General transcription factor II-I	60	5.84064	5.82853	6.05379	6.23508	6.15822	6.23005	6.47519	6.61276	5.98951	6.36905	1.06337	0.0886413	0.0323333	0.0332364
sp|P43897-2|EFTS_HUMAN	TSFM	EFTS_HUMAN Isoform 2 of Elongation factor Ts, mitochondrial	15	5.85179	5.77068	6.52311	6.32065	6.09738	6.10472	7.18475	6.62962	6.11656	6.50412	1.06336	0.0886334	0.0594495	0.079592
sp|P06737|PYGL_HUMAN	PYGL	PYGL_HUMAN Glycogen phosphorylase, liver form	68	6.03392	5.9299	6.09995	6.17378	6.57649	6.35765	6.43498	6.40251	6.05939	6.44291	1.06329	0.0885399	0.0170835	0.014672
sp|O15371|EIF3D_HUMAN	EIF3D	EIF3D_HUMAN Eukaryotic translation initiation factor 3 subunit D	43	6.16233	5.68929	5.91261	6.20915	6.26388	6.16343	6.53908	6.52416	5.99335	6.37264	1.06329	0.0885292	0.0401942	0.0295326
sp|Q96F10|SAT2_HUMAN	SAT2	SAT2_HUMAN Diamine acetyltransferase 2	4	5.74991	6.45547	6.13434	6.56411	6.17478	6.25609	6.92182	7.12587	6.22596	6.61964	1.06323	0.088457	0.0587986	0.0717973
sp|Q8N5M9|JAGN1_HUMAN	JAGN1	JAGN1_HUMAN Protein jagunal homolog 1	2	5.69619	5.3128	6.70287	6.42827	6.04947	6.52562	6.94187	6.14919	6.03503	6.41654	1.06322	0.0884335	0.106404	0.063247
sp|Q9P0K7-2|RAI14_HUMAN	RAI14	RAI14_HUMAN Isoform 2 of Ankycorbin	21	5.84162	5.78373	6.31619	6.21471	6.31174	6.24936	6.54301	6.57879	6.03906	6.42072	1.0632	0.0884116	0.0440011	0.0256203
sp|P35270|SPRE_HUMAN	SPR	SPRE_HUMAN Sepiapterin reductase	17	5.64738	5.62044	5.9058	6.11555	5.62265	5.52279	6.69997	6.91318	5.82229	6.18965	1.06309	0.0882699	0.0401958	0.116133
sp|Q9BZM4|N2DL3_HUMAN	ULBP3	N2DL3_HUMAN NKG2D ligand 3	1	6.42626	5.61076	5.56303	7.43727	6.29379	6.92676	6.86476	6.52974	6.25933	6.65376	1.06302	0.0881621	0.14052	0.0445843
tr|B4E3L0|B4E3L0_HUMAN	SMU1	B4E3L0_HUMAN WD40 repeat-containing protein SMU1	2	5.52643	6.64812	6.20505	6.83721	5.72095	6.38072	7.59603	7.10727	6.3042	6.70124	1.06298	0.0881147	0.0923632	0.122729
sp|Q99543|DNJC2_HUMAN	DNAJC2	DNJC2_HUMAN DnaJ homolog subfamily C member 2	22	5.76731	5.55971	6.27895	6.3511	6.0534	6.01211	6.72632	6.67128	5.98927	6.36578	1.06286	0.0879572	0.0645664	0.0605685
tr|R4GN35|R4GN35_HUMAN	DENND4C	R4GN35_HUMAN DENN domain-containing protein 4C	10	6.03055	5.72651	6.05265	6.23819	6.27983	6.39634	6.5317	6.3509	6.01197	6.38969	1.06283	0.0879075	0.0352408	0.0166081
sp|P28715|ERCC5_HUMAN	ERCC5	ERCC5_HUMAN DNA repair protein complementing XP-G cells	2	4.58242	6.89453	6.54652	6.82933	6.51485	6.797	6.36485	6.73722	6.2132	6.60348	1.06281	0.08789	0.176661	0.0303042
sp|P38117|ETFB_HUMAN	ETFB	ETFB_HUMAN Electron transfer flavoprotein subunit beta	34	6.12984	5.95805	5.81272	6.24745	6.35118	6.2166	6.44169	6.65509	6.03702	6.41614	1.0628	0.0878702	0.0316382	0.0287084
sp|Q02809|PLOD1_HUMAN	PLOD1	PLOD1_HUMAN Procollagen-lysine,2-oxoglutarate 5-dioxygenase 1	30	5.85684	5.7785	6.27032	6.49951	6.28724	6.19399	6.77922	6.67617	6.10129	6.48415	1.06275	0.0878037	0.0560703	0.0442436
sp|O94973-2|AP2A2_HUMAN	AP2A2	AP2A2_HUMAN Isoform 2 of AP-2 complex subunit alpha-2	16	6.04875	5.64618	6.53538	6.22685	6.21318	6.37469	6.75337	6.64938	6.11429	6.49765	1.0627	0.0877342	0.0607132	0.0381619
sp|P34949|MPI_HUMAN	MPI	MPI_HUMAN Mannose-6-phosphate isomerase	14	5.75459	5.80804	6.00403	6.63713	5.99081	6.36148	6.6242	6.74419	6.05095	6.43017	1.06267	0.0876958	0.0669703	0.0518917
sp|Q13098-7|CSN1_HUMAN	GPS1	CSN1_HUMAN Isoform 2 of COP9 signalosome complex subunit 1	23	5.95418	6.03746	6.25129	6.29083	6.2888	6.30705	6.834	6.64043	6.13344	6.51757	1.06263	0.0876377	0.0266255	0.0407751
sp|Q9UGC7|RF1ML_HUMAN	MTRF1L	RF1ML_HUMAN Peptide chain release factor 1-like, mitochondrial	4	5.8997	6.00365	6.23543	6.46676	6.187	6.37825	6.73387	6.84692	6.15139	6.53651	1.06261	0.0876093	0.0410935	0.0469472
sp|Q96DV4|RM38_HUMAN	MRPL38	RM38_HUMAN 39S ribosomal protein L38, mitochondrial	20	6.12552	5.85825	6.13664	6.57314	6.48337	6.2332	6.72242	6.7998	6.17339	6.5597	1.06258	0.0875669	0.0479393	0.0390209
sp|O43482|MS18B_HUMAN	OIP5	MS18B_HUMAN Protein Mis18-beta	1	6.17976	8.65139	6.05011	4.851	5.74207	5.29584	6.59704	9.70732	6.43306	6.83557	1.06257	0.0875549	0.247981	0.291002
sp|P00568|KAD1_HUMAN	AK1	KAD1_HUMAN Adenylate kinase isoenzyme 1	18	6.10092	6.0064	5.8404	6.16	6.37011	6.45676	6.24779	6.54068	6.02693	6.40384	1.06254	0.0875128	0.0231493	0.0195487
sp|Q9NSY1|BMP2K_HUMAN	BMP2K	BMP2K_HUMAN BMP-2-inducible protein kinase	12	5.65632	5.81349	5.94182	6.48917	6.32427	5.9803	6.62705	6.46356	5.9752	6.34879	1.06252	0.0874958	0.0605824	0.043326
sp|Q9Y484-2|WIPI4_HUMAN	WDR45	WIPI4_HUMAN Isoform 2 of WD repeat domain phosphoinositide-interacting protein 4	2	5.38432	6.0809	6.50066	6.19578	6.13761	6.99955	6.10584	6.42931	6.04041	6.41808	1.06252	0.0874935	0.0781235	0.064518
sp|Q0VDF9|HSP7E_HUMAN	HSPA14	HSP7E_HUMAN Heat shock 70 kDa protein 14	18	5.89997	5.91952	6.10111	6.22588	6.02542	6.12109	6.8563	6.65291	6.03662	6.41393	1.0625	0.0874676	0.025728	0.0629783
sp|Q99797|MIPEP_HUMAN	MIPEP	MIPEP_HUMAN Mitochondrial intermediate peptidase	28	5.79851	5.84502	6.25281	6.47557	6.14674	6.28868	6.68447	6.77523	6.09298	6.47378	1.0625	0.0874609	0.0536123	0.0468935
sp|Q9BRK5|CAB45_HUMAN	SDF4	CAB45_HUMAN 45 kDa calcium-binding protein	12	5.72529	5.88131	6.09447	6.24009	6.4425	6.32986	6.40452	6.2602	5.98529	6.35927	1.06248	0.08744	0.0380082	0.0127281
sp|O43426|SYNJ1_HUMAN	SYNJ1	SYNJ1_HUMAN Synaptojanin-1	13	5.7775	6.15211	6.34231	6.39055	6.17935	6.32089	6.80877	6.89434	6.16562	6.55084	1.06248	0.087434	0.0451646	0.0539996
sp|Q96C11-3|FGGY_HUMAN	FGGY	FGGY_HUMAN Isoform 4 of FGGY carbohydrate kinase domain-containing protein	3	6.3311	5.75727	5.98825	5.82351	6.3668	5.66198	6.6378	6.72519	5.97503	6.34794	1.06241	0.0873425	0.0429245	0.0759443
sp|Q9UKY7|CDV3_HUMAN	CDV3	CDV3_HUMAN Protein CDV3 homolog	17	6.39422	6.19619	5.69193	5.96105	6.6538	6.62262	5.69044	6.7889	6.06085	6.43894	1.06238	0.0873037	0.0500009	0.0783035
sp|Q9UKM7|MA1B1_HUMAN	MAN1B1	MA1B1_HUMAN Endoplasmic reticulum mannosyl-oligosaccharide 1,2-alpha-mannosidase	7	5.49724	5.8009	6.53727	6.40523	6.24531	6.34554	6.50721	6.65456	6.06016	6.43816	1.06237	0.0872914	0.0814433	0.0279822
sp|Q9NX00|TM160_HUMAN	TMEM160	TM160_HUMAN Transmembrane protein 160	3	6.19072	5.35093	6.41649	5.98793	6.55874	6.35987	6.40481	6.11398	5.98652	6.35935	1.06228	0.0871623	0.0765816	0.0289995
sp|O00231|PSD11_HUMAN	PSMD11	PSD11_HUMAN 26S proteasome non-ATPase regulatory subunit 11	49	5.69736	5.64254	5.89993	6.22779	6.08984	5.85061	6.41408	6.57421	5.86691	6.23218	1.06226	0.0871384	0.0451406	0.0520707
sp|Q969Y2-2|GTPB3_HUMAN	GTPBP3	GTPB3_HUMAN Isoform 2 of tRNA modification GTPase GTPBP3, mitochondrial	6	6.08995	6.5278	5.55835	6.2382	6.19973	6.56065	6.5728	6.59877	6.10358	6.48299	1.06216	0.0870043	0.0665882	0.0292314
sp|P48556|PSMD8_HUMAN	PSMD8	PSMD8_HUMAN 26S proteasome non-ATPase regulatory subunit 8	22	5.86549	5.95794	5.99598	6.30176	6.35035	6.1837	6.4407	6.64475	6.03029	6.40488	1.06212	0.0869424	0.0313569	0.0299938
sp|Q92934|BAD_HUMAN	BAD	BAD_HUMAN Bcl2 antagonist of cell death	1	6.72877	5.50504	6.15616	6.50577	6.43747	7.04769	6.93461	6.0223	6.22393	6.61052	1.06211	0.0869362	0.0858091	0.0716013
sp|Q9Y6Y8|S23IP_HUMAN	SEC23IP	S23IP_HUMAN SEC23-interacting protein	37	5.83953	5.5612	6.21537	6.4156	6.2201	6.13161	6.66559	6.50694	6.00793	6.38106	1.06211	0.0869293	0.0635377	0.0389097
sp|Q8WV60|PTCD2_HUMAN	PTCD2	PTCD2_HUMAN Pentatricopeptide repeat-containing protein 2, mitochondrial	3	5.85948	6.23586	6.17861	6.52173	6.8477	6.73946	6.85309	5.89528	6.19892	6.58388	1.0621	0.0869217	0.0438045	0.0701778
sp|Q92545|TM131_HUMAN	TMEM131	TM131_HUMAN Transmembrane protein 131	7	5.81475	5.63575	6.58721	6.49819	6.78129	6.56531	6.14358	6.56821	6.13398	6.5146	1.06205	0.0868538	0.0780831	0.0410192
sp|Q96SQ9-2|CP2S1_HUMAN	CYP2S1	CP2S1_HUMAN Isoform 2 of Cytochrome P450 2S1	7	5.98276	5.4886	6.27404	6.41073	6.31791	6.10583	6.89598	6.33514	6.03903	6.41371	1.06204	0.0868428	0.0675698	0.0526991
sp|Q93009|UBP7_HUMAN	USP7	UBP7_HUMAN Ubiquitin carboxyl-terminal hydrolase 7	67	5.80064	5.77809	6.16974	6.44328	6.15135	6.20402	6.68732	6.64938	6.04794	6.42302	1.06202	0.086808	0.0527299	0.0442973
sp|Q96EX1|SIM12_HUMAN	SMIM12	SIM12_HUMAN Small integral membrane protein 12	2	6.18786	6.28302	5.81299	5.73203	6.851	6.73752	5.93582	5.98058	6.00398	6.37623	1.062	0.0867857	0.0453194	0.0761048
sp|Q14BN4-3|SLMAP_HUMAN	SLMAP	SLMAP_HUMAN Isoform 3 of Sarcolemmal membrane-associated protein	24	5.58497	5.87485	6.37887	6.57978	6.09135	6.20002	6.90791	6.73269	6.10462	6.48299	1.06198	0.086759	0.0746983	0.0614656
sp|Q96S52|PIGS_HUMAN	PIGS	PIGS_HUMAN GPI transamidase component PIG-S	15	5.73901	5.76709	6.03054	6.57797	6.09932	6.03285	6.66864	6.80813	6.02865	6.40223	1.06197	0.0867401	0.0645322	0.0614231
sp|P61626|LYSC_HUMAN	LYZ	LYSC_HUMAN Lysozyme C	2	5.8017	7.17659	5.02082	4.43125	4.81679	3.67052	8.48898	6.84254	5.60759	5.95471	1.0619	0.0866498	0.211693	0.359175
sp|Q01081-2|U2AF1_HUMAN	U2AF1	U2AF1_HUMAN Isoform 2 of Splicing factor U2AF 35 kDa subunit	1	6.64685	3.82819	7.39332	7.31365	7.35082	5.19929	7.87937	6.31132	6.2955	6.6852	1.0619	0.0866492	0.266632	0.177344
sp|Q9NR19-2|ACSA_HUMAN	ACSS2	ACSA_HUMAN Isoform 2 of Acetyl-coenzyme A synthetase, cytoplasmic	2	5.58774	6.09819	6.40651	6.42522	5.87027	6.31377	6.61604	7.23481	6.12941	6.50872	1.06188	0.086625	0.0637926	0.0880072
sp|Q14203|DCTN1_HUMAN	DCTN1	DCTN1_HUMAN Dynactin subunit 1	40	5.76598	5.68793	6.47186	6.51164	6.14478	6.16135	6.88233	6.75934	6.10935	6.48695	1.06181	0.0865208	0.0725119	0.0599437
sp|Q58EX7|PKHG4_HUMAN	PLEKHG4	PKHG4_HUMAN Puratrophin-1	2	6.24634	6.70115	5.75963	7.11722	7.03907	6.424	6.69919	7.25788	6.45608	6.85503	1.06179	0.0865045	0.0905912	0.0536805
sp|Q9Y487|VPP2_HUMAN	ATP6V0A2	VPP2_HUMAN V-type proton ATPase 116 kDa subunit a isoform 2	8	5.73129	5.62691	6.49271	6.69365	6.34279	6.41804	6.59338	6.70603	6.13614	6.51506	1.06175	0.0864471	0.0873154	0.0253288
sp|Q9UN86|G3BP2_HUMAN	G3BP2	G3BP2_HUMAN Ras GTPase-activating protein-binding protein 2	21	6.1984	6.01837	6.08511	5.88121	6.70721	6.81079	6.14772	6.01004	6.04577	6.41894	1.06172	0.0864084	0.0219173	0.0621469
sp|P55209|NP1L1_HUMAN	NAP1L1	NP1L1_HUMAN Nucleosome assembly protein 1-like 1	42	6.14937	6.1046	6.11786	6.60381	6.32339	6.3546	6.77072	7.06835	6.24391	6.62926	1.06172	0.0863992	0.0385443	0.053814
sp|P48200|IREB2_HUMAN	IREB2	IREB2_HUMAN Iron-responsive element-binding protein 2	16	5.74249	5.82624	6.10927	6.37368	5.96341	6.20244	6.79613	6.57238	6.01292	6.38359	1.06165	0.0863022	0.0477601	0.0582776
sp|P07093-3|GDN_HUMAN	SERPINE2	GDN_HUMAN Isoform 3 of Glia-derived nexin	8	5.95285	5.95843	6.45577	6.41787	6.57304	6.83644	6.33369	6.56959	6.19623	6.57819	1.06164	0.0863	0.0449062	0.0312252
sp|Q9H2P0|ADNP_HUMAN	ADNP	ADNP_HUMAN Activity-dependent neuroprotector homeobox protein	23	5.96655	6.00599	6.47402	6.30252	6.71484	6.33755	6.74247	6.47947	6.18727	6.56858	1.06163	0.0862791	0.0392676	0.0295394
sp|Q99550|MPP9_HUMAN	MPHOSPH9	MPP9_HUMAN M-phase phosphoprotein 9	1	6.3345	5.59068	6.20106	6.02187	6.15576	8.80156	5.51528	5.16283	6.03703	6.40886	1.06159	0.0862288	0.0536624	0.257025
sp|Q4KWH8|PLCH1_HUMAN	PLCH1	PLCH1_HUMAN 1-phosphatidylinositol 4,5-bisphosphate phosphodiesterase eta-1	5	6.10836	5.95824	6.36216	6.68937	6.72636	6.32402	6.91631	6.69523	6.27953	6.66548	1.06146	0.0860516	0.0509694	0.0371653
sp|Q96G23|CERS2_HUMAN	CERS2	CERS2_HUMAN Ceramide synthase 2	8	5.97531	6.12406	6.24935	6.35032	6.2971	6.5481	7.00453	6.36678	6.17476	6.55413	1.06144	0.0860207	0.0262365	0.0485741
sp|Q969R5|LMBL2_HUMAN	L3MBTL2	LMBL2_HUMAN Lethal(3)malignant brain tumor-like protein 2	4	5.45104	5.99786	6.67651	6.4533	6.57973	6.22875	6.90344	6.37596	6.14468	6.52197	1.0614	0.0859705	0.0881809	0.0448033
tr|H0Y5C6|H0Y5C6_HUMAN	FLNA	H0Y5C6_HUMAN Filamin-A (Fragment)	2	5.54067	6.56506	7.65721	5.79258	7.41252	5.18331	6.91121	7.61748	6.38888	6.78113	1.0614	0.0859627	0.148894	0.163064
sp|Q9Y2A7-2|NCKP1_HUMAN	NCKAP1	NCKP1_HUMAN Isoform 2 of Nck-associated protein 1	46	5.78477	5.96153	6.18868	6.28893	6.09276	6.27952	6.70213	6.63652	6.05598	6.42773	1.06139	0.08595	0.037455	0.0451849
sp|Q8TBX8|PI42C_HUMAN	PIP4K2C	PI42C_HUMAN Phosphatidylinositol 5-phosphate 4-kinase type-2 gamma	13	5.71422	5.31109	6.52323	6.46082	6.1891	5.78663	6.86627	6.64117	6.00234	6.37079	1.06138	0.0859478	0.0982041	0.0754343
sp|O00499|BIN1_HUMAN	BIN1	BIN1_HUMAN Myc box-dependent-interacting protein 1	14	6.03902	6.24879	6.05097	6.23091	6.72442	6.37667	6.24302	6.73299	6.14242	6.51928	1.06135	0.0859038	0.0183709	0.0380307
sp|Q29983|MICA_HUMAN	MICA	MICA_HUMAN MHC class I polypeptide-related sequence A	3	6.27703	6.42497	5.92452	5.81879	6.59225	6.55408	6.50003	6.29692	6.11133	6.48582	1.06128	0.0858032	0.0468856	0.0202741
sp|Q5T6S3|PHF19_HUMAN	PHF19	PHF19_HUMAN PHD finger protein 19	2	6.03727	5.70797	6.69255	6.25106	6.88375	6.52255	7.31688	5.47735	6.17221	6.55013	1.06123	0.0857364	0.0668468	0.119915
sp|Q14181|DPOA2_HUMAN	POLA2	DPOA2_HUMAN DNA polymerase alpha subunit B	10	5.81561	5.49187	6.23301	6.02081	6.24716	6.31839	6.62518	5.81263	5.89032	6.25084	1.0612	0.0857028	0.0535792	0.0535976
sp|Q96C24|SYTL4_HUMAN	SYTL4	SYTL4_HUMAN Synaptotagmin-like protein 4	2	5.96428	6.0178	6.22167	6.09686	6.4637	6.67029	6.34288	6.31087	6.07515	6.44694	1.0612	0.0856928	0.0184084	0.025252
sp|Q96EK5|KBP_HUMAN	KIAA1279	KBP_HUMAN KIF1-binding protein	26	5.7606	5.55112	6.18106	6.42416	6.05359	6.30547	6.6907	6.3297	5.97924	6.34486	1.06115	0.0856286	0.0661818	0.0413226
sp|O95057|DIRA1_HUMAN	DIRAS1	DIRA1_HUMAN GTP-binding protein Di-Ras1	3	5.9031	5.6974	6.3832	6.21799	6.36263	6.39194	6.54396	6.38309	6.05042	6.4204	1.06115	0.0856284	0.0509553	0.0129711
sp|O76083|PDE9A_HUMAN	PDE9A	PDE9A_HUMAN High affinity cGMP-specific 3',5'-cyclic phosphodiesterase 9A	1	5.1358	5.46284	6.28157	6.75652	5.888	5.94417	6.49705	6.75006	5.90918	6.26982	1.06103	0.0854655	0.125655	0.0672969
sp|Q2NL82|TSR1_HUMAN	TSR1	TSR1_HUMAN Pre-rRNA-processing protein TSR1 homolog	49	6.01731	6.03541	6.09545	6.16773	6.55922	6.62367	6.36647	6.24932	6.07897	6.44967	1.06098	0.0853973	0.011177	0.0267562
sp|Q12996|CSTF3_HUMAN	CSTF3	CSTF3_HUMAN Cleavage stimulation factor subunit 3	26	5.86755	5.84158	6.19361	6.51679	6.16184	6.22109	6.69415	6.83103	6.10488	6.47703	1.06096	0.0853683	0.0520743	0.0517698
sp|Q14667|K0100_HUMAN	KIAA0100	K0100_HUMAN UPF0378 protein KIAA0100	3	6.18585	5.40439	5.88526	6.99554	5.44452	6.71281	6.99311	6.81185	6.11776	6.49057	1.06094	0.0853422	0.109166	0.108921
sp|Q9H2U2|IPYR2_HUMAN	PPA2	IPYR2_HUMAN Inorganic pyrophosphatase 2, mitochondrial	27	5.97926	6.00163	6.00276	6.29355	6.27338	6.29505	6.50596	6.68026	6.0693	6.43866	1.06086	0.0852309	0.0246966	0.0298534
sp|Q96NT5|PCFT_HUMAN	SLC46A1	PCFT_HUMAN Proton-coupled folate transporter	1	5.3601	5.51482	7.38987	7.61093	6.44761	6.96535	7.35931	6.67583	6.46893	6.86203	1.06077	0.0851073	0.184903	0.0573353
sp|Q10471|GALT2_HUMAN	GALNT2	GALT2_HUMAN Polypeptide N-acetylgalactosaminyltransferase 2	24	5.85209	6.1294	6.06522	6.44701	6.24701	6.26567	6.81381	6.65501	6.12343	6.49538	1.06074	0.0850728	0.0401963	0.0436661
sp|P67870|CSK2B_HUMAN	CSNK2B	CSK2B_HUMAN Casein kinase II subunit beta	21	6.20387	6.16286	5.84475	5.76584	6.47368	6.6534	6.1039	6.20206	5.99433	6.35826	1.06071	0.0850335	0.0369145	0.0395309
sp|Q96E29|MTER1_HUMAN	MTERFD1	MTER1_HUMAN mTERF domain-containing protein 1, mitochondrial	9	5.96584	5.67178	6.42605	6.28671	6.2288	6.12732	6.96066	6.51028	6.0876	6.45677	1.06064	0.0849391	0.0554573	0.0577612
sp|Q9NRL3|STRN4_HUMAN	STRN4	STRN4_HUMAN Striatin-4	8	5.96912	5.96304	6.27656	6.56921	6.45266	6.26755	6.56633	6.99351	6.19448	6.57001	1.06062	0.0849124	0.0467426	0.0468819
sp|Q86X27|RGPS2_HUMAN	RALGPS2	RGPS2_HUMAN Ras-specific guanine nucleotide-releasing factor RalGPS2	3	5.13702	6.24096	6.28787	7.08729	6.22183	6.44274	6.73377	6.85464	6.18828	6.56324	1.06059	0.0848696	0.12948	0.0435482
sp|Q8IZE3-2|PACE1_HUMAN	SCYL3	PACE1_HUMAN Isoform 2 of Protein-associating with the carboxyl-terminal domain of ezrin	6	5.82169	5.34644	6.02312	6.72223	6.58911	6.2197	6.06584	6.48737	5.97837	6.34051	1.06057	0.0848456	0.0955643	0.0379185
sp|Q9BZE2|PUS3_HUMAN	PUS3	PUS3_HUMAN tRNA pseudouridine(38/39) synthase	5	5.78848	5.72425	6.54064	6.67738	6.41779	6.29239	6.85166	6.66695	6.18269	6.5572	1.06057	0.0848453	0.080244	0.0382084
sp|Q9UQ80|PA2G4_HUMAN	PA2G4	PA2G4_HUMAN Proliferation-associated protein 2G4	73	5.97276	5.87332	5.98318	6.00802	6.36191	6.28973	6.50711	6.12135	5.95932	6.32003	1.06053	0.0847825	0.00993577	0.0253731
sp|Q96EY8|MMAB_HUMAN	MMAB	MMAB_HUMAN Cob(I)yrinic acid a,c-diamide adenosyltransferase, mitochondrial	4	5.7647	5.93075	6.16315	6.227	6.60024	6.0936	6.50528	6.34238	6.0214	6.38537	1.06045	0.0846724	0.0354218	0.0347285
sp|Q9NRW7|VPS45_HUMAN	VPS45	VPS45_HUMAN Vacuolar protein sorting-associated protein 45	15	5.83956	5.71848	6.23135	6.50249	6.36897	6.18273	6.62641	6.58186	6.07297	6.43999	1.06044	0.0846568	0.0593488	0.0318363
sp|P01037|CYTN_HUMAN	CST1	CYTN_HUMAN Cystatin-SN	1	5.75523	7.73875	4.51018	5.97702	6.05405	4.69627	7.07691	7.60314	5.99529	6.35759	1.06043	0.0846498	0.221767	0.201452
sp|P53677|AP3M2_HUMAN	AP3M2	AP3M2_HUMAN AP-3 complex subunit mu-2	7	5.61273	5.85274	6.67991	5.8444	6.22628	6.17448	6.4515	6.58687	5.99744	6.35978	1.06042	0.0846294	0.0780958	0.0304004
sp|Q96KP4|CNDP2_HUMAN	CNDP2	CNDP2_HUMAN Cytosolic non-specific dipeptidase	31	6.14535	6.02337	6.11674	6.22803	6.29225	6.656	6.49225	6.55359	6.12837	6.49852	1.0604	0.0846078	0.0137754	0.023576
sp|Q8NE71|ABCF1_HUMAN	ABCF1	ABCF1_HUMAN ATP-binding cassette sub-family F member 1	23	6.10003	6.02917	6.41897	6.1767	6.40296	6.91124	6.76276	6.14052	6.18122	6.55437	1.06037	0.0845661	0.0274322	0.053216
sp|P22102|PUR2_HUMAN	GART	PUR2_HUMAN Trifunctional purine biosynthetic protein adenosine-3	75	5.81608	5.73103	6.22924	6.44078	6.26803	6.19019	6.53845	6.68225	6.05428	6.41973	1.06036	0.0845566	0.0557052	0.0358285
sp|Q9BSI4|TINF2_HUMAN	TINF2	TINF2_HUMAN TERF1-interacting nuclear factor 2	1	5.61342	5.11058	6.38414	6.74717	5.93788	6.17183	6.1584	7.02683	5.96383	6.32374	1.06035	0.0845384	0.124017	0.0760382
sp|Q13247|SRSF6_HUMAN	SRSF6	SRSF6_HUMAN Serine/arginine-rich splicing factor 6	3	6.33022	5.98414	6.46416	6.33129	6.85267	6.69977	6.8253	6.24713	6.27745	6.65622	1.06034	0.0845234	0.0327212	0.042176
sp|P62140|PP1B_HUMAN	PPP1CB	PP1B_HUMAN Serine/threonine-protein phosphatase PP1-beta catalytic subunit	11	5.89392	6.03944	5.95744	6.18699	6.04718	6.34382	6.63714	6.50234	6.01945	6.38262	1.06033	0.0845177	0.0210296	0.0397535
sp|P56537|IF6_HUMAN	EIF6	IF6_HUMAN Eukaryotic translation initiation factor 6	19	6.33118	6.08816	5.94883	6.03281	6.5154	6.4073	6.3756	6.57453	6.10024	6.46821	1.06032	0.0844988	0.0269279	0.0143421
sp|Q9ULR5|PAI2B_HUMAN	PAIP2B	PAI2B_HUMAN Polyadenylate-binding protein-interacting protein 2B	5	5.75424	6.1375	6.31927	6.32569	6.97899	6.36649	6.44652	6.22242	6.13418	6.5036	1.06022	0.0843703	0.0436722	0.0507733
sp|Q9UDX3|S14L4_HUMAN	SEC14L4	S14L4_HUMAN SEC14-like protein 4	13	5.97036	6.0148	5.92405	6.17626	6.40911	6.32542	6.53269	6.26862	6.02137	6.38396	1.06022	0.0843604	0.0182197	0.0179703
sp|O60513|B4GT4_HUMAN	B4GALT4	B4GT4_HUMAN Beta-1,4-galactosyltransferase 4	2	5.43346	5.47587	6.74878	6.42447	5.58926	5.96967	7.00717	6.96606	6.02065	6.38304	1.06019	0.0843256	0.110792	0.111896
sp|Q9Y3B4|PM14_HUMAN	SF3B14	PM14_HUMAN Pre-mRNA branch site protein p14	6	6.06535	5.52768	6.67906	6.32354	6.49938	6.01814	6.91072	6.64782	6.14891	6.51902	1.06019	0.0843239	0.0788081	0.0574838
sp|Q2T9J0|TYSD1_HUMAN	TYSND1	TYSD1_HUMAN Peroxisomal leader peptide-processing protease	5	5.9664	6.12247	6.21617	6.31418	6.40814	6.00012	6.2575	7.43493	6.1548	6.52517	1.06018	0.0843029	0.0240455	0.0964674
sp|O95202|LETM1_HUMAN	LETM1	LETM1_HUMAN LETM1 and EF-hand domain-containing protein 1, mitochondrial	41	5.82545	5.73802	6.18319	6.4312	6.26288	6.12944	6.66252	6.57684	6.04446	6.40792	1.06013	0.0842415	0.0532404	0.0394737
sp|Q9NR33|DPOE4_HUMAN	POLE4	DPOE4_HUMAN DNA polymerase epsilon subunit 4	3	6.00557	6.41501	6.50007	5.8925	6.7074	6.64625	6.76774	6.18115	6.20329	6.57563	1.06002	0.0840972	0.0482348	0.0406997
sp|Q86TB9|PATL1_HUMAN	PATL1	PATL1_HUMAN Protein PAT1 homolog 1	13	5.72377	5.81278	6.4054	6.53123	6.19272	6.43978	6.7107	6.59832	6.11829	6.48538	1.06	0.0840614	0.0668547	0.0346224
sp|Q9BSJ8-2|ESYT1_HUMAN	ESYT1	ESYT1_HUMAN Isoform 2 of Extended synaptotagmin-1	31	5.83675	5.98255	6.07072	6.27163	6.26574	6.26733	6.68891	6.38875	6.04041	6.40268	1.05997	0.0840294	0.0301053	0.0311318
sp|Q9BQ39|DDX50_HUMAN	DDX50	DDX50_HUMAN ATP-dependent RNA helicase DDX50	5	5.98504	5.9419	6.19211	6.46551	6.38395	6.03208	6.69952	6.94145	6.14614	6.51425	1.05989	0.0839185	0.0389332	0.0605206
sp|Q9H0C5|BTBD1_HUMAN	BTBD1	BTBD1_HUMAN BTB/POZ domain-containing protein 1	3	6.09045	5.84181	6.17359	6.28003	6.3626	6.04728	6.56075	6.87579	6.09647	6.46161	1.05989	0.0839184	0.0306183	0.053822
sp|Q9H9L4|KANL2_HUMAN	KANSL2	KANL2_HUMAN KAT8 regulatory NSL complex subunit 2	3	5.13781	5.90591	6.59077	6.78438	5.97575	6.49284	6.9945	6.41795	6.10472	6.47026	1.05988	0.0838992	0.122313	0.0645072
sp|Q96RP9|EFGM_HUMAN	GFM1	EFGM_HUMAN Elongation factor G, mitochondrial	35	5.73881	5.77899	6.17493	6.34033	6.04454	6.08157	6.57088	6.77337	6.00826	6.36759	1.05981	0.083799	0.0493001	0.0567796
sp|P60228|EIF3E_HUMAN	EIF3E	EIF3E_HUMAN Eukaryotic translation initiation factor 3 subunit E	44	5.81707	5.75557	6.21794	6.31645	6.03734	6.35029	6.67517	6.48563	6.02676	6.38711	1.05979	0.0837807	0.0467336	0.0420478
sp|O00303|EIF3F_HUMAN	EIF3F	EIF3F_HUMAN Eukaryotic translation initiation factor 3 subunit F	27	5.94893	5.81494	6.12543	6.47111	6.1765	6.21068	6.7498	6.67569	6.0901	6.45317	1.05962	0.083541	0.0466418	0.0467337
sp|Q8WVQ1|CANT1_HUMAN	CANT1	CANT1_HUMAN Soluble calcium-activated nucleotidase 1	12	6.06586	6.21374	6.12852	6.04729	6.59276	6.46353	6.2925	6.56422	6.11385	6.47825	1.0596	0.083523	0.0122859	0.0209431
sp|P06493|CDK1_HUMAN	CDK1	CDK1_HUMAN Cyclin-dependent kinase 1	25	5.92279	5.56641	6.34972	6.63456	6.54176	6.30867	6.57112	6.5105	6.11837	6.48301	1.0596	0.083517	0.0768286	0.0183302
sp|Q8TAP6|CEP76_HUMAN	CEP76	CEP76_HUMAN Centrosomal protein of 76 kDa	5	5.94333	5.82739	6.47781	6.41031	6.81134	6.97449	6.31792	6.02453	6.16471	6.53207	1.05959	0.0835072	0.0530734	0.06715
sp|Q99829|CPNE1_HUMAN	CPNE1	CPNE1_HUMAN Copine-1	21	5.74063	6.15655	6.15056	6.49911	6.21742	6.25378	6.78992	6.74771	6.13671	6.50221	1.05956	0.0834636	0.0505593	0.0474748
sp|P10620|MGST1_HUMAN	MGST1	MGST1_HUMAN Microsomal glutathione S-transferase 1	2	5.77613	5.75225	6.31996	6.16659	6.4844	6.1705	6.90438	5.88436	6.00373	6.36091	1.05949	0.0833735	0.0472649	0.0687643
sp|Q9UK22|FBX2_HUMAN	FBXO2	FBX2_HUMAN F-box only protein 2	10	6.00359	5.63654	6.0571	6.13864	6.2255	5.98546	6.4344	6.60825	5.95897	6.3134	1.05948	0.0833554	0.0372561	0.0425848
sp|Q7Z7A1|CNTRL_HUMAN	CNTRL	CNTRL_HUMAN Centriolin	2	6.19922	6.53223	6.28633	5.69116	6.06725	6.88281	6.55475	6.67286	6.17724	6.54442	1.05944	0.0833036	0.0572101	0.0528441
sp|O95822|DCMC_HUMAN	MLYCD	DCMC_HUMAN Malonyl-CoA decarboxylase, mitochondrial	7	5.56116	5.70786	6.55161	6.77846	5.92856	6.3291	7.00936	6.79213	6.14977	6.51479	1.05935	0.0831851	0.0983954	0.0741282
sp|Q15642|CIP4_HUMAN	TRIP10	CIP4_HUMAN Cdc42-interacting protein 4	29	6.08101	6.25921	6.07327	6.30465	6.40942	6.70138	6.48303	6.59001	6.17953	6.54596	1.0593	0.0831065	0.0193742	0.0194638
sp|P61587|RND3_HUMAN	RND3	RND3_HUMAN Rho-related GTP-binding protein RhoE	1	5.39055	6.13477	5.59583	7.14321	5.95146	7.35186	6.8002	5.59889	6.06609	6.4256	1.05927	0.0830648	0.129188	0.124065
sp|Q9UJA5|TRM6_HUMAN	TRMT6	TRM6_HUMAN tRNA (adenine(58)-N(1))-methyltransferase non-catalytic subunit TRM6	12	5.91575	5.76423	6.36216	6.54699	6.27554	6.27197	6.59219	6.90623	6.14728	6.51148	1.05925	0.0830373	0.0598641	0.0465287
sp|P46940|IQGA1_HUMAN	IQGAP1	IQGA1_HUMAN Ras GTPase-activating-like protein IQGAP1	121	5.94315	5.83341	6.25307	6.27114	6.44339	6.32698	6.7004	6.26937	6.07519	6.43504	1.05923	0.0830179	0.0363037	0.0297038
sp|Q96S55|WRIP1_HUMAN	WRNIP1	WRIP1_HUMAN ATPase WRNIP1	19	5.77725	5.45801	6.45456	6.41691	6.36993	6.46575	6.42347	6.27536	6.02668	6.38363	1.05923	0.0830124	0.0813424	0.0128673
sp|P78314-3|3BP2_HUMAN	SH3BP2	3BP2_HUMAN Isoform 3 of SH3 domain-binding protein 2	1	6.42979	5.74978	6.5649	5.43544	6.07579	6.44896	7.16977	5.91737	6.04498	6.40297	1.05922	0.0830048	0.0894466	0.0870938
sp|O75530|EED_HUMAN	EED	EED_HUMAN Polycomb protein EED	15	5.80986	5.60498	6.3112	6.27152	6.07547	6.20084	6.78598	6.35619	5.99939	6.35462	1.05921	0.08299	0.0579619	0.0487281
sp|Q9HBD1|RC3H2_HUMAN	RC3H2	RC3H2_HUMAN Roquin-2	3	5.97617	5.99437	5.99532	6.57968	6.65608	6.69495	6.75292	5.89431	6.13638	6.49957	1.05918	0.0829542	0.0481817	0.0623827
sp|Q9H668|STN1_HUMAN	OBFC1	STN1_HUMAN CST complex subunit STN1	3	5.51089	6.46465	6.09687	6.47588	6.24946	6.00559	6.69057	7.05432	6.13707	6.49999	1.05913	0.0828858	0.0738252	0.0716557
sp|Q08426|ECHP_HUMAN	EHHADH	ECHP_HUMAN Peroxisomal bifunctional enzyme	16	6.0415	5.93493	6.04256	6.32548	6.14256	6.63594	6.54264	6.4618	6.08612	6.44573	1.05909	0.0828227	0.0275006	0.033243
sp|Q9UII2|ATIF1_HUMAN	ATPIF1	ATIF1_HUMAN ATPase inhibitor, mitochondrial	2	6.60267	5.86991	5.58288	5.60207	6.2091	5.5833	5.07857	8.18396	5.91438	6.26373	1.05907	0.0827951	0.0806841	0.2173
sp|Q8TB36|GDAP1_HUMAN	GDAP1	GDAP1_HUMAN Ganglioside-induced differentiation-associated protein 1	4	6.15382	5.78245	6.44103	6.32558	6.36103	5.94071	7.0904	6.76805	6.17572	6.54005	1.05899	0.0826938	0.0465551	0.0762543
sp|Q6FI13|H2A2A_HUMAN	HIST2H2AA3	H2A2A_HUMAN Histone H2A type 2-A	8	6.26903	6.0431	5.89331	6.79514	6.48354	6.67908	6.63398	6.67787	6.25014	6.61862	1.05895	0.0826402	0.0631648	0.0139702
sp|Q9UJT0|TBE_HUMAN	TUBE1	TBE_HUMAN Tubulin epsilon chain	4	5.39341	5.84033	6.33508	6.35316	5.89267	5.9356	6.38173	7.12209	5.9805	6.33302	1.05895	0.0826293	0.0765599	0.0901039
sp|Q8TCG2|P4K2B_HUMAN	PI4K2B	P4K2B_HUMAN Phosphatidylinositol 4-kinase type 2-beta	4	5.36738	5.93611	6.02592	6.40532	5.64877	5.72229	7.04012	6.7211	5.93368	6.28307	1.05888	0.0825419	0.0722684	0.111857
sp|Q13671|RIN1_HUMAN	RIN1	RIN1_HUMAN Ras and Rab interactor 1	6	5.66634	5.59804	6.44368	6.96909	6.09003	6.28507	7.14385	6.61106	6.16929	6.5325	1.05887	0.0825319	0.106467	0.0705347
sp|Q12913|PTPRJ_HUMAN	PTPRJ	PTPRJ_HUMAN Receptor-type tyrosine-protein phosphatase eta	5	5.93654	6.38154	5.76366	6.16646	6.44114	6.48075	5.99153	6.76195	6.06205	6.41884	1.05886	0.0825074	0.044444	0.0496458
sp|P26641|EF1G_HUMAN	EEF1G	EF1G_HUMAN Elongation factor 1-gamma	61	5.9557	5.80253	6.04791	6.37459	5.45237	6.46736	6.87734	6.80615	6.04518	6.40081	1.05883	0.0824675	0.0399991	0.102659
sp|Q9NZV5|SELN_HUMAN	SEPN1	SELN_HUMAN Selenoprotein N	8	5.96973	5.66711	6.17015	6.83273	6.31351	6.25173	6.80908	6.71477	6.15993	6.52227	1.05882	0.0824608	0.0801795	0.0430109
sp|Q5XPI4-2|RN123_HUMAN	RNF123	RN123_HUMAN Isoform 2 of E3 ubiquitin-protein ligase RNF123	4	5.99376	5.87722	6.57452	6.73094	6.16875	6.1856	7.60191	6.70058	6.29411	6.66421	1.0588	0.0824315	0.0669969	0.100852
sp|Q9NVS2-2|RT18A_HUMAN	MRPS18A	RT18A_HUMAN Isoform 2 of 28S ribosomal protein S18a, mitochondrial	6	5.48081	5.88881	6.4028	6.90842	6.08993	5.74598	7.32963	6.96614	6.17021	6.53292	1.05878	0.0824084	0.100496	0.113105
sp|Q16512-2|PKN1_HUMAN	PKN1	PKN1_HUMAN Isoform 2 of Serine/threonine-protein kinase N1	27	5.59741	6.18653	6.24146	6.42363	6.15529	6.17527	6.68959	6.86578	6.11226	6.47148	1.05877	0.0823909	0.0585509	0.0557688
sp|P55196-1|AFAD_HUMAN	MLLT4	AFAD_HUMAN Isoform 2 of Afadin	2	5.99293	6.01151	5.59515	6.01677	6.52297	5.96037	6.09151	6.42934	5.90409	6.25105	1.05877	0.0823833	0.0349273	0.0428931
sp|Q9Y2R5|RT17_HUMAN	MRPS17	RT17_HUMAN 28S ribosomal protein S17, mitochondrial	13	5.98335	5.58756	6.28157	6.24631	6.39467	6.27087	6.53122	6.31811	6.0247	6.37872	1.05876	0.0823776	0.0531747	0.0178324
sp|Q96BJ8-3|ELMO3_HUMAN	ELMO3	ELMO3_HUMAN Isoform 3 of Engulfment and cell motility protein 3	13	5.70239	5.56295	6.18134	6.61455	6.15442	6.22455	6.71946	6.37565	6.01531	6.36852	1.05872	0.0823196	0.0796811	0.0394931
sp|Q7Z7M9|GALT5_HUMAN	GALNT5	GALT5_HUMAN Polypeptide N-acetylgalactosaminyltransferase 5	1	5.69185	5.9554	5.4961	6.9761	6.88581	6.57419	6.56954	5.50611	6.02986	6.38391	1.05872	0.0823158	0.109173	0.0945546
sp|Q7Z5L2-2|R3HCL_HUMAN	R3HCC1L	R3HCL_HUMAN Isoform 2 of Coiled-coil domain-containing protein R3HCC1L	5	5.53835	5.85913	6.66614	5.90448	6.02647	7.09769	5.91386	6.33731	5.99202	6.34383	1.05871	0.082311	0.07978	0.084101
sp|P54886|P5CS_HUMAN	ALDH18A1	P5CS_HUMAN Delta-1-pyrroline-5-carboxylate synthase	50	5.85778	5.66214	6.42194	6.35545	6.12116	5.97797	6.82608	6.79832	6.07433	6.43088	1.0587	0.082292	0.0613522	0.0690909
sp|Q9UNF1|MAGD2_HUMAN	MAGED2	MAGD2_HUMAN Melanoma-associated antigen D2	17	5.63039	5.51904	6.44644	6.66365	6.19599	6.13939	6.5145	6.83328	6.06488	6.42079	1.05868	0.0822717	0.0947585	0.0499556
sp|Q99459|CDC5L_HUMAN	CDC5L	CDC5L_HUMAN Cell division cycle 5-like protein	20	5.85977	6.10479	6.33648	6.38001	6.55796	6.483	6.46253	6.62517	6.17026	6.53216	1.05865	0.0822294	0.0388416	0.0113814
sp|Q96P11-4|NSUN5_HUMAN	NSUN5	NSUN5_HUMAN Isoform 4 of Putative methyltransferase NSUN5	10	5.90191	5.89288	6.24129	6.34042	6.45634	6.41408	6.30103	6.63443	6.09413	6.45147	1.05864	0.0822088	0.0378677	0.0214645
sp|O75534-3|CSDE1_HUMAN	CSDE1	CSDE1_HUMAN Isoform 3 of Cold shock domain-containing protein E1	64	5.88355	5.66111	6.11206	6.24842	6.147	5.98542	6.59266	6.58122	5.97628	6.32658	1.05861	0.0821757	0.04325	0.0486568
sp|P54577|SYYC_HUMAN	YARS	SYYC_HUMAN Tyrosine--tRNA ligase, cytoplasmic	65	6.08686	5.80905	6.15357	6.19619	6.33163	6.09242	6.64048	6.60196	6.06142	6.41662	1.0586	0.0821589	0.0287321	0.0399152
sp|P49368|TCPG_HUMAN	CCT3	TCPG_HUMAN T-complex protein 1 subunit gamma	119	6.06237	5.9683	6.09893	6.26666	6.30543	5.97491	6.57381	6.97163	6.09906	6.45645	1.0586	0.0821519	0.0204203	0.0653378
sp|Q99805|TM9S2_HUMAN	TM9SF2	TM9S2_HUMAN Transmembrane 9 superfamily member 2	20	5.73673	6.08938	6.24732	6.43175	6.21103	6.33761	6.67914	6.71297	6.1263	6.48519	1.05858	0.0821334	0.0481529	0.0384407
sp|Q9BYC9|RM20_HUMAN	MRPL20	RM20_HUMAN 39S ribosomal protein L20, mitochondrial	4	6.03165	6.06914	6.19351	6.37079	6.64531	6.09304	6.76806	6.60308	6.16627	6.52737	1.05856	0.0821037	0.0247948	0.0456371
sp|P26599-3|PTBP1_HUMAN	PTBP1	PTBP1_HUMAN Isoform 3 of Polypyrimidine tract-binding protein 1	21	5.80491	5.75081	5.8218	5.96446	6.20383	6.0529	6.13637	6.31379	5.83549	6.17672	1.05847	0.0819865	0.0156204	0.0178535
sp|Q9NU53|GINM1_HUMAN	GINM1	GINM1_HUMAN Glycoprotein integral membrane protein 1	4	5.87021	5.77899	6.49238	6.2426	6.29725	6.09219	6.58306	6.83732	6.09605	6.45246	1.05847	0.0819746	0.0544132	0.0505416
sp|O00154|BACH_HUMAN	ACOT7	BACH_HUMAN Cytosolic acyl coenzyme A thioester hydrolase	33	5.95917	6.12575	6.09507	6.2099	6.31947	6.39362	6.61303	6.48943	6.09747	6.45389	1.05845	0.0819571	0.017089	0.0196583
sp|Q86YS3|RFIP4_HUMAN	RAB11FIP4	RFIP4_HUMAN Rab11 family-interacting protein 4	1	6.1919	7.62993	6.12522	4.95182	6.08017	7.26192	6.08998	6.92072	6.22472	6.5882	1.05839	0.0818754	0.176126	0.0906826
sp|O94985|CSTN1_HUMAN	CLSTN1	CSTN1_HUMAN Calsyntenin-1	7	6.2652	6.02965	6.03897	6.1543	6.33556	6.35214	6.46941	6.75973	6.12203	6.47921	1.05834	0.0818078	0.0181335	0.0302928
sp|Q68CR1|SE1L3_HUMAN	SEL1L3	SE1L3_HUMAN Protein sel-1 homolog 3	6	5.9371	6.14618	6.5021	6.34327	6.38947	6.37911	6.82406	6.79022	6.23216	6.59572	1.05833	0.0817962	0.0392675	0.0370786
sp|Q9UHG3|PCYOX_HUMAN	PCYOX1	PCYOX_HUMAN Prenylcysteine oxidase 1	23	5.96721	5.93394	6.23729	6.23328	6.34712	6.46668	6.51525	6.4632	6.09293	6.44806	1.05829	0.0817296	0.0270717	0.0110678
sp|Q9BXF6|RFIP5_HUMAN	RAB11FIP5	RFIP5_HUMAN Rab11 family-interacting protein 5	9	5.7164	5.77879	6.21215	6.25773	5.95641	6.43306	6.50479	6.46658	5.99127	6.34021	1.05824	0.0816694	0.0472573	0.04062
sp|P46821|MAP1B_HUMAN	MAP1B	MAP1B_HUMAN Microtubule-associated protein 1B	26	5.91046	6.05489	6.51951	6.19935	6.37582	6.44288	6.60511	6.69755	6.17105	6.53034	1.05822	0.0816415	0.0422179	0.0225534
sp|Q8NBF6|AVL9_HUMAN	AVL9	AVL9_HUMAN Late secretory pathway protein AVL9 homolog	13	6.08023	5.94825	6.4712	6.34223	6.33733	6.52787	6.73217	6.69043	6.21048	6.57195	1.0582	0.0816173	0.0384496	0.0273182
sp|Q9Y605|MOFA1_HUMAN	MRFAP1	MOFA1_HUMAN MORF4 family-associated protein 1	3	5.98794	6.47012	5.92494	5.85743	6.13507	6.1146	6.7961	6.60427	6.06011	6.41251	1.05815	0.0815458	0.0459543	0.0532378
sp|Q9UPN3-2|MACF1_HUMAN	MACF1	MACF1_HUMAN Isoform 2 of Microtubule-actin cross-linking factor 1, isoforms 1/2/3/5	158	5.77907	6.11305	6.27531	6.38789	6.29916	6.26194	6.59239	6.82884	6.13883	6.49558	1.05811	0.0814952	0.0431755	0.0410795
tr|G3V1K3|G3V1K3_HUMAN	PON2	G3V1K3_HUMAN Paraoxonase 2, isoform CRA_a	10	5.74018	6.09585	5.88695	6.60057	6.16954	6.38966	6.31444	6.8631	6.08089	6.43419	1.0581	0.0814755	0.0618228	0.0466541
sp|P36383|CXG1_HUMAN	GJC1	CXG1_HUMAN Gap junction gamma-1 protein	1	5.99198	5.8247	5.91151	6.66066	7.225	5.92699	6.55702	6.09482	6.09721	6.45096	1.05802	0.0813635	0.0626175	0.0900234
sp|O00562|PITM1_HUMAN	PITPNM1	PITM1_HUMAN Membrane-associated phosphatidylinositol transfer protein 1	7	5.61342	5.74388	6.33975	6.65549	5.9617	5.9551	6.96508	6.88324	6.08813	6.44128	1.05801	0.0813471	0.0809728	0.0867201
sp|Q9H5Z1|DHX35_HUMAN	DHX35	DHX35_HUMAN Probable ATP-dependent RNA helicase DHX35	3	5.96901	5.89657	6.43003	6.50183	5.77306	6.09015	7.07441	7.29814	6.19936	6.55894	1.058	0.0813434	0.0501039	0.113053
sp|P36404|ARL2_HUMAN	ARL2	ARL2_HUMAN ADP-ribosylation factor-like protein 2	12	5.96189	6.04553	6.18897	6.27872	6.66175	6.40656	6.52279	6.30211	6.11878	6.4733	1.05794	0.0812585	0.0232064	0.0238859
sp|Q9UJ70-2|NAGK_HUMAN	NAGK	NAGK_HUMAN Isoform 2 of N-acetyl-D-glucosamine kinase	15	5.79321	6.09599	6.42258	6.46921	6.54517	6.64477	6.37035	6.65601	6.19525	6.55408	1.05792	0.0812303	0.0508921	0.0201745
sp|Q96FW1|OTUB1_HUMAN	OTUB1	OTUB1_HUMAN Ubiquitin thioesterase OTUB1	16	5.83953	5.74415	5.95034	6.39358	6.4074	6.35673	6.31207	6.23687	5.9819	6.32827	1.0579	0.0812068	0.047994	0.0114271
sp|Q9C0C7-5|AMRA1_HUMAN	AMBRA1	AMRA1_HUMAN Isoform 5 of Activating molecule in BECN1-regulated autophagy protein 1	7	5.91145	5.7425	6.5871	6.52757	6.03879	6.36862	6.83367	6.96159	6.19216	6.55067	1.0579	0.0812003	0.0691145	0.0650124
sp|Q5T653|RM02_HUMAN	MRPL2	RM02_HUMAN 39S ribosomal protein L2, mitochondrial	15	6.10184	6.13084	6.28162	6.13193	6.63839	5.92849	6.73172	6.77372	6.16156	6.51808	1.05786	0.081152	0.0131859	0.0609241
sp|Q3B726|RPA43_HUMAN	TWISTNB	RPA43_HUMAN DNA-directed RNA polymerase I subunit RPA43	5	5.83958	5.51259	6.32857	6.51012	6.23381	6.35966	6.33362	6.66305	6.04772	6.39753	1.05784	0.081126	0.0753138	0.0289383
sp|P55010|IF5_HUMAN	EIF5	IF5_HUMAN Eukaryotic translation initiation factor 5	26	5.79654	5.90806	5.9558	6.46199	5.98379	6.22688	6.35636	6.94842	6.0306	6.37886	1.05775	0.0809982	0.0489563	0.064261
sp|Q6PL24|TMED8_HUMAN	TMED8	TMED8_HUMAN Protein TMED8	6	5.84806	5.80705	6.62122	6.71869	6.08307	6.42949	6.97502	6.95032	6.24876	6.60947	1.05773	0.0809669	0.0781391	0.065327
sp|P09651-2|ROA1_HUMAN	HNRNPA1	ROA1_HUMAN Isoform A1-A of Heterogeneous nuclear ribonucleoprotein A1	42	6.08845	6.07642	5.85578	5.93535	6.45108	5.9257	6.21267	6.74936	5.989	6.3347	1.05772	0.0809617	0.0188313	0.0552632
sp|Q3ZCQ8-2|TIM50_HUMAN	TIMM50	TIM50_HUMAN Isoform 2 of Mitochondrial import inner membrane translocase subunit TIM50	9	5.78837	5.8186	6.44736	6.41725	6.04197	6.09625	6.98767	6.758	6.11789	6.47097	1.05771	0.0809472	0.0594105	0.073239
sp|Q9NZQ3|SPN90_HUMAN	NCKIPSD	SPN90_HUMAN NCK-interacting protein with SH3 domain	9	5.42053	5.793	6.49107	6.63877	6.7014	6.32875	6.37967	6.33783	6.08584	6.43691	1.05769	0.0809119	0.0947888	0.0276086
sp|P27824|CALX_HUMAN	CANX	CALX_HUMAN Calnexin	92	6.09484	6.02266	5.98741	6.27331	6.43658	6.42538	6.47585	6.44557	6.09455	6.44585	1.05764	0.0808486	0.0208846	0.0033574
sp|Q9NYP3|DONS_HUMAN	DONSON	DONS_HUMAN Protein downstream neighbor of Son	1	5.70565	6.18712	7.2169	5.84728	6.31139	5.77957	7.294	7.00866	6.23924	6.5984	1.05757	0.0807476	0.109368	0.103715
sp|P11182|ODB2_HUMAN	DBT	ODB2_HUMAN Lipoamide acyltransferase component of branched-chain alpha-keto acid dehydrogenase complex, mitochondrial	12	5.86098	5.72807	6.34106	6.38965	6.31198	6.45537	6.80487	6.14732	6.07994	6.42989	1.05756	0.0807358	0.0550325	0.0435289
sp|Q9UKD1|GMEB2_HUMAN	GMEB2	GMEB2_HUMAN Glucocorticoid modulatory element-binding protein 2	3	6.00665	5.95795	6.05895	6.10112	6.37647	5.96148	6.33153	6.84253	6.03117	6.378	1.05751	0.0806674	0.0103222	0.0566352
sp|O94913|PCF11_HUMAN	PCF11	PCF11_HUMAN Pre-mRNA cleavage complex 2 protein Pcf11	16	6.09491	6.06651	6.05228	6.17098	6.39767	6.58302	6.39185	6.41435	6.09617	6.44672	1.0575	0.0806627	0.0086822	0.0141722
sp|P43366|MAGB1_HUMAN	MAGEB1	MAGB1_HUMAN Melanoma-associated antigen B1	2	6.71345	6.14854	6.24764	5.62445	6.47108	6.55697	6.95611	6.17066	6.18352	6.53871	1.05744	0.0805766	0.0722463	0.0495246
sp|Q8N1G2|CMTR1_HUMAN	CMTR1	CMTR1_HUMAN Cap-specific mRNA (nucleoside-2'-O-)-methyltransferase 1	14	5.87777	5.76573	6.47253	6.43758	6.05181	6.15542	6.78637	6.96785	6.1384	6.49036	1.05734	0.0804358	0.060075	0.0700506
sp|O76071|CIAO1_HUMAN	CIAO1	CIAO1_HUMAN Probable cytosolic iron-sulfur protein assembly protein CIAO1	8	6.20565	5.3313	6.34918	6.3666	6.28467	6.0639	6.19252	7.10203	6.06318	6.41078	1.05733	0.0804247	0.0813472	0.0732583
sp|Q9BQ95|ECSIT_HUMAN	ECSIT	ECSIT_HUMAN Evolutionarily conserved signaling intermediate in Toll pathway, mitochondrial	4	5.77768	6.05732	5.99706	6.43834	6.13706	6.06979	6.3074	7.14701	6.0676	6.41531	1.05731	0.0803941	0.0452936	0.0776176
tr|E9PK54|E9PK54_HUMAN	HSPA8	E9PK54_HUMAN Heat shock cognate 71 kDa protein (Fragment)	1	5.81881	6.67804	6.09146	5.35841	7.40462	5.48565	6.10345	6.32499	5.98668	6.32968	1.05729	0.0803758	0.0920911	0.126359
sp|P17544|ATF7_HUMAN	ATF7	ATF7_HUMAN Cyclic AMP-dependent transcription factor ATF-7	2	5.66351	5.55372	5.56308	5.83041	5.42457	6.94569	6.03089	5.50484	5.65268	5.9765	1.05729	0.0803652	0.0227302	0.117101
sp|O96008|TOM40_HUMAN	TOMM40	TOM40_HUMAN Mitochondrial import receptor subunit TOM40 homolog	20	5.77777	6.18145	6.42271	6.25341	6.62631	6.67515	6.51535	6.22966	6.15883	6.51162	1.05728	0.0803585	0.0443968	0.0306389
sp|P78395|PRAME_HUMAN	PRAME	PRAME_HUMAN Melanoma antigen preferentially expressed in tumors	2	6.02612	5.48008	6.75875	6.95879	7.08572	6.33988	6.97944	6.26281	6.30593	6.66696	1.05725	0.0803193	0.108006	0.0638322
sp|Q6Q0C0|TRAF7_HUMAN	TRAF7	TRAF7_HUMAN E3 ubiquitin-protein ligase TRAF7	7	6.13179	5.73192	6.4652	6.15481	6.03081	6.41324	6.63667	6.80465	6.12093	6.47134	1.05725	0.0803142	0.0491134	0.0517049
sp|Q13049|TRI32_HUMAN	TRIM32	TRI32_HUMAN E3 ubiquitin-protein ligase TRIM32	11	6.06038	5.96514	6.23133	6.2084	6.60876	6.23517	6.49275	6.52864	6.11631	6.46633	1.05723	0.080285	0.0206142	0.0249843
sp|Q9NWT6|HIF1N_HUMAN	HIF1AN	HIF1N_HUMAN Hypoxia-inducible factor 1-alpha inhibitor	6	5.7737	6.12224	6.36514	6.2	5.80249	6.50509	7.0096	6.54293	6.11527	6.46503	1.05719	0.0802403	0.0407538	0.0769872
sp|P55085|PAR2_HUMAN	F2RL1	PAR2_HUMAN Proteinase-activated receptor 2	1	5.45102	5.44574	6.44365	7.21443	6.23736	6.71725	6.27248	6.73062	6.13871	6.48943	1.05713	0.0801557	0.139604	0.0417942
sp|Q9UBU8|MO4L1_HUMAN	MORF4L1	MO4L1_HUMAN Mortality factor 4-like protein 1	13	6.25678	5.94269	6.19893	6.45748	6.3732	6.3276	6.7781	6.79671	6.21397	6.5689	1.05712	0.0801371	0.0341315	0.0385308
sp|O43581-2|SYT7_HUMAN	SYT7	SYT7_HUMAN Isoform 2 of Synaptotagmin-7	2	6.06402	6.11996	6.44	6.288	6.60059	6.30753	6.5486	6.87512	6.22799	6.58296	1.057	0.0799686	0.02736	0.0353774
sp|Q0P6H9|TMM62_HUMAN	TMEM62	TMM62_HUMAN Transmembrane protein 62	2	5.1916	5.65175	6.12696	6.56729	5.93205	6.77345	6.34007	5.8325	5.8844	6.21952	1.05695	0.0799073	0.100981	0.0690807
tr|H0YDN1|H0YDN1_HUMAN	PLEC	H0YDN1_HUMAN Plectin (Fragment)	1	4.99007	6.23767	6.15751	6.53727	6.18516	6.77224	6.7471	5.57954	5.98063	6.32101	1.05691	0.0798576	0.11375	0.0891845
sp|P61421|VA0D1_HUMAN	ATP6V0D1	VA0D1_HUMAN V-type proton ATPase subunit d 1	8	6.08312	6.05643	5.9686	6.80279	6.45881	6.28415	6.85795	6.72663	6.22774	6.58188	1.05687	0.0797933	0.0620577	0.0393224
sp|Q10469|MGAT2_HUMAN	MGAT2	MGAT2_HUMAN Alpha-1,6-mannosyl-glycoprotein 2-beta-N-acetylglucosaminyltransferase	4	5.77271	5.4632	6.6929	7.01125	6.2594	6.42983	6.92451	6.74405	6.23501	6.58945	1.05685	0.0797645	0.117917	0.045576
sp|Q9Y606|TRUA_HUMAN	PUS1	TRUA_HUMAN tRNA pseudouridine synthase A, mitochondrial	17	5.81092	5.83792	6.20155	6.65664	6.13116	6.23777	6.80413	6.72638	6.12676	6.47486	1.05682	0.0797252	0.0645728	0.0524519
sp|P61923|COPZ1_HUMAN	COPZ1	COPZ1_HUMAN Coatomer subunit zeta-1	7	5.9462	6.00226	6.15536	6.30348	6.49774	6.3625	6.41092	6.52281	6.10182	6.44849	1.05681	0.0797211	0.0263686	0.0115891
sp|Q9BUT1|BDH2_HUMAN	BDH2	BDH2_HUMAN 3-hydroxybutyrate dehydrogenase type 2	3	5.51777	6.02771	6.16843	6.69856	5.83287	5.8796	7.18425	6.90263	6.10312	6.44984	1.05681	0.0797164	0.0795498	0.107797
sp|Q92547|TOPB1_HUMAN	TOPBP1	TOPB1_HUMAN DNA topoisomerase 2-binding protein 1	14	5.69648	5.5148	6.49155	6.44494	6.03565	6.2552	6.54795	6.68049	6.03694	6.37982	1.0568	0.0796982	0.0834657	0.0454876
sp|Q6PIJ6|FBX38_HUMAN	FBXO38	FBX38_HUMAN F-box only protein 38	9	6.01731	5.39869	6.30918	6.27823	6.50149	6.27043	6.01277	6.58178	6.00085	6.34162	1.05679	0.0796834	0.0703643	0.0403516
sp|Q9Y4I1-3|MYO5A_HUMAN	MYO5A	MYO5A_HUMAN Isoform 3 of Unconventional myosin-Va	10	5.88869	5.77847	6.27215	6.2962	6.60593	6.75923	6.26497	5.9809	6.05888	6.40276	1.05676	0.0796428	0.0436048	0.0545001
sp|Q96MG7|MAGG1_HUMAN	NDNL2	MAGG1_HUMAN Melanoma-associated antigen G1	8	6.07838	6.07761	6.00688	6.37702	6.34659	6.5925	6.51377	6.47904	6.13497	6.48298	1.05672	0.0795991	0.0268642	0.0158211
sp|P11171|41_HUMAN	EPB41	41_HUMAN Protein 4.1	11	5.80701	6.43316	6.38263	6.03075	5.94849	6.14127	7.03828	6.92345	6.16339	6.51287	1.0567	0.0795705	0.0482619	0.0841565
sp|Q8N8I0|SAM12_HUMAN	SAMD12	SAM12_HUMAN Sterile alpha motif domain-containing protein 12	1	5.66415	6.69502	6.0914	5.83979	6.97145	7.17798	6.55094	4.96696	6.07259	6.41683	1.05669	0.0795494	0.0741822	0.156023
sp|P06576|ATPB_HUMAN	ATP5B	ATPB_HUMAN ATP synthase subunit beta, mitochondrial	125	5.98369	6.06782	6.18474	6.21133	6.34498	6.33082	6.53664	6.6209	6.11189	6.45833	1.05668	0.0795425	0.0173084	0.0221999
sp|Q96ME1-4|FXL18_HUMAN	FBXL18	FXL18_HUMAN Isoform 4 of F-box/LRR-repeat protein 18	13	5.67837	5.7089	6.22414	6.21228	5.9582	6.18099	6.37854	6.6563	5.95592	6.29351	1.05668	0.0795393	0.0509004	0.0471302
sp|Q9UFC0|LRWD1_HUMAN	LRWD1	LRWD1_HUMAN Leucine-rich repeat and WD repeat-containing protein 1	18	5.97012	5.77701	6.6996	6.34414	6.34567	6.26936	6.71846	6.8623	6.19772	6.54895	1.05667	0.0795261	0.0660103	0.0437624
sp|Q02156|KPCE_HUMAN	PRKCE	KPCE_HUMAN Protein kinase C epsilon type	11	5.70653	5.77343	6.44513	6.67314	6.14757	6.16734	6.69295	6.98426	6.14956	6.49803	1.05667	0.0795198	0.0785074	0.0632392
sp|Q96PZ2|F111A_HUMAN	FAM111A	F111A_HUMAN Protein FAM111A	2	5.58897	5.33096	6.46069	7.09055	6.91992	6.42956	6.53339	5.97465	6.11779	6.46438	1.05665	0.0795008	0.132209	0.0601337
sp|Q5QNW6-2|H2B2F_HUMAN	HIST2H2BF	H2B2F_HUMAN Isoform 2 of Histone H2B type 2-F	12	5.71859	5.64951	6.24282	6.57243	6.11475	6.2455	6.6264	6.56644	6.04584	6.38827	1.05664	0.0794837	0.072744	0.03873
sp|Q15311|RBP1_HUMAN	RALBP1	RBP1_HUMAN RalA-binding protein 1	11	6.12998	6.03992	6.21942	6.2506	6.33748	6.54676	6.62086	6.53021	6.15998	6.50883	1.05663	0.079472	0.0154177	0.0185656
tr|B4DDJ7|B4DDJ7_HUMAN	RAD23A	B4DDJ7_HUMAN UV excision repair protein RAD23 homolog A	1	5.4393	5.34317	7.95002	6.61692	5.87026	7.19128	7.96521	5.75716	6.33735	6.69598	1.05659	0.0794144	0.192694	0.159443
sp|Q9BXY0|MAK16_HUMAN	MAK16	MAK16_HUMAN Protein MAK16 homolog	2	6.13135	6.32904	6.78263	5.4623	6.49658	7.46971	6.56754	5.56931	6.17633	6.52579	1.05658	0.0794016	0.0888179	0.118976
sp|Q9Y376|CAB39_HUMAN	CAB39	CAB39_HUMAN Calcium-binding protein 39	24	5.85722	5.85296	6.18775	6.28618	6.26002	6.33716	6.46693	6.48808	6.04603	6.38805	1.05657	0.0793875	0.037068	0.016959
sp|O00267|SPT5H_HUMAN	SUPT5H	SPT5H_HUMAN Transcription elongation factor SPT5	45	5.81404	5.99208	6.23617	6.37224	6.31863	6.18822	6.583	6.70545	6.10363	6.44882	1.05656	0.0793682	0.0407977	0.0367746
sp|Q9GZR2|REXO4_HUMAN	REXO4	REXO4_HUMAN RNA exonuclease 4	5	5.78147	5.81808	6.91479	6.41636	6.29994	6.80021	6.4424	6.79714	6.23268	6.58492	1.05652	0.079315	0.0866251	0.0385096
sp|P54619-3|AAKG1_HUMAN	PRKAG1	AAKG1_HUMAN Isoform 3 of 5'-AMP-activated protein kinase subunit gamma-1	15	5.80129	5.91176	6.54016	6.29832	6.40418	6.46963	6.46561	6.59911	6.13788	6.48463	1.05649	0.0792838	0.0558069	0.012643
sp|Q9NSK0-3|KLC4_HUMAN	KLC4	KLC4_HUMAN Isoform 3 of Kinesin light chain 4	6	5.93317	6.00092	6.36594	6.71985	5.76819	6.04091	6.81849	7.80571	6.25497	6.60833	1.05649	0.0792817	0.0581231	0.138297
sp|Q7L5Y1-4|ENOF1_HUMAN	ENOSF1	ENOF1_HUMAN Isoform 4 of Mitochondrial enolase superfamily member 1	16	5.97451	5.59672	6.13764	6.47008	6.18389	6.07305	6.58463	6.7032	6.04474	6.38619	1.05649	0.0792764	0.060044	0.0477405
sp|Q9Y4F1-2|FARP1_HUMAN	FARP1	FARP1_HUMAN Isoform 2 of FERM, RhoGEF and pleckstrin domain-containing protein 1	7	5.77765	6.5048	6.31582	6.10825	6.23879	6.60886	6.74875	6.50298	6.17663	6.52485	1.05638	0.0791237	0.0504176	0.0330485
sp|Q9H8W3|F204A_HUMAN	FAM204A	F204A_HUMAN Protein FAM204A	3	6.0824	5.93495	6.55071	6.10997	6.26722	6.47706	6.82011	6.50436	6.16951	6.51719	1.05635	0.0790942	0.0430336	0.0349921
sp|Q5T1M5|FKB15_HUMAN	FKBP15	FKB15_HUMAN FK506-binding protein 15	18	5.73351	6.38382	6.26374	6.24675	6.48929	6.18338	6.68309	6.65885	6.15695	6.50365	1.05631	0.0790331	0.0469085	0.0354054
sp|Q6VY07|PACS1_HUMAN	PACS1	PACS1_HUMAN Phosphofurin acidic cluster sorting protein 1	11	6.09707	6.00071	6.22573	6.37103	6.48243	6.59196	6.48531	6.52496	6.17363	6.52116	1.05629	0.0790095	0.0260251	0.00782536
sp|O15056|SYNJ2_HUMAN	SYNJ2	SYNJ2_HUMAN Synaptojanin-2	8	5.9705	5.95546	6.08597	6.4232	6.28385	5.95451	6.7748	6.79541	6.10878	6.45214	1.05621	0.0788934	0.0356157	0.0631403
sp|Q9UGN5|PARP2_HUMAN	PARP2	PARP2_HUMAN Poly [ADP-ribose] polymerase 2	6	6.04858	5.85732	6.16724	6.51203	6.16878	6.38429	6.88578	6.52788	6.14629	6.49168	1.05619	0.078876	0.0447799	0.0464198
sp|Q8IV38|ANKY2_HUMAN	ANKMY2	ANKY2_HUMAN Ankyrin repeat and MYND domain-containing protein 2	15	5.76876	5.66027	6.24814	6.47669	6.00938	6.00695	6.8984	6.59581	6.03847	6.37763	1.05617	0.0788397	0.0642651	0.0696423
sp|P78560|CRADD_HUMAN	CRADD	CRADD_HUMAN Death domain-containing protein CRADD	1	6.22614	4.90314	4.79619	8.27001	6.36239	7.34459	6.35927	5.48816	6.04887	6.3886	1.05616	0.0788347	0.267369	0.118737
sp|Q13409-2|DC1I2_HUMAN	DYNC1I2	DC1I2_HUMAN Isoform 2B of Cytoplasmic dynein 1 intermediate chain 2	11	5.90592	6.05745	6.16067	6.25624	6.30652	6.3498	6.41097	6.68213	6.09507	6.43736	1.05616	0.0788252	0.024605	0.0262088
sp|Q01415|GALK2_HUMAN	GALK2	GALK2_HUMAN N-acetylgalactosamine kinase	6	5.6232	5.75469	6.67534	6.89149	5.99106	6.35171	7.25955	6.74296	6.23618	6.58632	1.05615	0.07881	0.102672	0.0825649
sp|Q9H6X2|ANTR1_HUMAN	ANTXR1	ANTR1_HUMAN Anthrax toxin receptor 1	3	5.08594	5.79369	5.86132	6.5943	6.1924	6.19516	5.17645	7.08083	5.83381	6.16121	1.05612	0.0787747	0.105668	0.126334
sp|Q9P0T7|TMEM9_HUMAN	TMEM9	TMEM9_HUMAN Transmembrane protein 9	4	6.18621	6.21469	5.34322	5.97436	6.01713	6.66841	6.26958	6.09442	5.92962	6.26239	1.05612	0.0787726	0.0683633	0.0463972
sp|O60427|FADS1_HUMAN	FADS1	FADS1_HUMAN Fatty acid desaturase 1	5	5.91438	5.83226	6.16521	6.20586	6.39684	6.51893	6.28914	6.26561	6.02943	6.36763	1.05609	0.0787355	0.0305333	0.0182049
sp|O75351|VPS4B_HUMAN	VPS4B	VPS4B_HUMAN Vacuolar protein sorting-associated protein 4B	19	5.99896	5.71656	6.3221	6.43487	6.36023	6.07314	6.58279	6.82879	6.11812	6.46124	1.05608	0.0787215	0.0531638	0.0498068
sp|O43670-2|ZN207_HUMAN	ZNF207	ZN207_HUMAN Isoform 2 of Zinc finger protein 207	1	6.95663	6.02827	5.6462	6.26001	6.47666	8.61125	5.15574	6.04308	6.22278	6.57168	1.05607	0.0787041	0.0885164	0.223177
sp|Q8NFH3|NUP43_HUMAN	NUP43	NUP43_HUMAN Nucleoporin Nup43	14	5.74114	6.61367	5.94281	5.89557	6.03791	6.59129	6.1267	6.79147	6.0483	6.38684	1.05597	0.0785738	0.0639235	0.0568099
sp|Q9P287-2|BCCIP_HUMAN	BCCIP	BCCIP_HUMAN Isoform 2 of BRCA2 and CDKN1A-interacting protein	24	5.9015	5.76458	6.22163	6.25895	6.14983	6.38223	6.50954	6.45592	6.03667	6.37438	1.05594	0.0785333	0.0401146	0.0248709
sp|Q9BRT9|SLD5_HUMAN	GINS4	SLD5_HUMAN DNA replication complex GINS protein SLD5	9	6.20376	5.51441	5.96955	6.66208	6.81758	5.88882	6.03436	6.97119	6.08745	6.42799	1.05594	0.0785291	0.0785538	0.084853
sp|Q6DD88|ATLA3_HUMAN	ATL3	ATLA3_HUMAN Atlastin-3	20	5.86146	5.84116	6.28372	6.45743	6.30523	6.23726	6.58533	6.68279	6.11094	6.45265	1.05592	0.0784974	0.0504313	0.0333219
sp|Q9HB71|CYBP_HUMAN	CACYBP	CYBP_HUMAN Calcyclin-binding protein	53	6.15821	6.05277	5.99693	6.12606	6.28202	6.43589	6.22805	6.74842	6.08349	6.42359	1.05591	0.0784811	0.0119412	0.0363922
sp|Q9Y2I1|NISCH_HUMAN	NISCH	NISCH_HUMAN Nischarin	7	5.84095	5.97271	5.99877	6.36089	6.18831	5.92654	6.87674	6.53265	6.04333	6.38106	1.05588	0.0784524	0.0368492	0.0647678
sp|Q9BV36|MELPH_HUMAN	MLPH	MELPH_HUMAN Melanophilin	4	5.89811	6.49486	6.059	6.41028	6.90141	7.17463	5.8793	6.29503	6.21556	6.56259	1.05583	0.0783809	0.0456201	0.0891933
sp|Q9UBT2|SAE2_HUMAN	UBA2	SAE2_HUMAN SUMO-activating enzyme subunit 2	37	6.0827	5.86893	6.24714	6.30386	6.28682	6.31678	6.5536	6.71276	6.12566	6.46749	1.0558	0.0783412	0.0318603	0.0312988
sp|Q9H2G2|SLK_HUMAN	SLK	SLK_HUMAN STE20-like serine/threonine-protein kinase	40	5.93453	6.22616	5.99278	6.24286	6.38957	6.4738	6.51351	6.38034	6.09908	6.43931	1.05578	0.0783128	0.0259585	0.010083
sp|Q7Z4W1|DCXR_HUMAN	DCXR	DCXR_HUMAN L-xylulose reductase	14	6.09458	5.82434	6.11893	6.32097	6.39212	6.10741	6.66794	6.54986	6.0897	6.42933	1.05577	0.0782966	0.03349	0.0377242
sp|Q70CQ3|UBP30_HUMAN	USP30	UBP30_HUMAN Ubiquitin carboxyl-terminal hydrolase 30	3	6.16307	5.5826	6.40841	6.95049	6.56046	6.54067	6.71258	6.69096	6.27614	6.62617	1.05577	0.0782966	0.0904151	0.013298
sp|Q12891|HYAL2_HUMAN	HYAL2	HYAL2_HUMAN Hyaluronidase-2	1	4.78842	6.47668	5.84404	6.5397	6.15555	5.70408	6.09673	7.0108	5.91221	6.24179	1.05575	0.0782623	0.137408	0.088188
sp|P56749|CLD12_HUMAN	CLDN12	CLD12_HUMAN Claudin-12	1	5.2941	6.62707	6.3131	6.52094	7.05335	5.9108	5.89564	7.2752	6.1888	6.53375	1.05574	0.0782504	0.098655	0.112295
sp|Q8IX18|DHX40_HUMAN	DHX40	DHX40_HUMAN Probable ATP-dependent RNA helicase DHX40	12	6.18871	5.80898	6.15135	6.47417	6.23106	6.1492	7.03413	6.58019	6.1558	6.49864	1.05569	0.078192	0.044265	0.0620053
sp|Q9H8Y5|ANKZ1_HUMAN	ANKZF1	ANKZ1_HUMAN Ankyrin repeat and zinc finger domain-containing protein 1	3	5.98394	5.43806	6.53454	7.09885	6.72426	6.3958	6.93979	6.38942	6.26385	6.61232	1.05563	0.0781069	0.114039	0.0406113
sp|P37837|TALDO_HUMAN	TALDO1	TALDO_HUMAN Transaldolase	51	6.05517	6.01451	5.91384	5.91424	6.17952	6.09831	6.5966	6.34994	5.97444	6.30609	1.05551	0.0779428	0.0119998	0.0349243
sp|P50616|TOB1_HUMAN	TOB1	TOB1_HUMAN Protein Tob1	2	6.35745	5.28924	5.84414	7.22057	6.73761	6.43771	6.34723	6.56049	6.17785	6.52076	1.05551	0.0779353	0.132841	0.0259065
sp|Q9UBW8|CSN7A_HUMAN	COPS7A	CSN7A_HUMAN COP9 signalosome complex subunit 7a	11	6.07889	6.19655	6.09042	6.26089	6.18337	6.43431	6.5423	6.83352	6.15669	6.49838	1.0555	0.0779247	0.0141881	0.0414427
sp|Q6NUM9|RETST_HUMAN	RETSAT	RETST_HUMAN All-trans-retinol 13,14-reductase	14	5.8253	5.70722	6.36802	6.09193	6.1758	6.14449	6.63156	6.37215	5.99812	6.331	1.0555	0.0779236	0.0490917	0.0354255
sp|P52209|6PGD_HUMAN	PGD	6PGD_HUMAN 6-phosphogluconate dehydrogenase, decarboxylating	52	5.83449	5.82882	6.17316	6.272	6.21865	5.99924	6.47959	6.74807	6.02712	6.36139	1.05546	0.0778733	0.0380432	0.0509397
sp|P53992|SC24C_HUMAN	SEC24C	SC24C_HUMAN Protein transport protein Sec24C	22	5.62607	5.7468	6.44274	6.48567	6.1755	6.10799	6.78049	6.58452	6.07532	6.41213	1.05544	0.0778421	0.0744129	0.0504469
sp|Q99611|SPS2_HUMAN	SEPHS2	SPS2_HUMAN Selenide, water dikinase 2	12	6.01636	6.23936	6.18483	5.96827	6.34739	6.52616	6.7995	6.08877	6.10221	6.44046	1.05543	0.077832	0.0213555	0.0464598
sp|P40616|ARL1_HUMAN	ARL1	ARL1_HUMAN ADP-ribosylation factor-like protein 1	11	6.09381	6.37639	6.0516	5.56387	6.55293	6.66892	6.27162	5.92657	6.02142	6.35501	1.0554	0.0777912	0.0560325	0.0520487
sp|Q8TCN5|ZN507_HUMAN	ZNF507	ZN507_HUMAN Zinc finger protein 507	1	6.21818	5.9647	6.06714	7.18139	6.55718	6.06213	7.45923	6.76072	6.35785	6.70981	1.05536	0.0777334	0.0878928	0.0863466
sp|Q9H0V1|TM168_HUMAN	TMEM168	TM168_HUMAN Transmembrane protein 168	1	6.05873	5.05854	6.22757	7.20516	6.08764	6.88908	6.15503	6.77685	6.1375	6.47715	1.05534	0.077708	0.143232	0.0639666
sp|Q6UWP2|DHR11_HUMAN	DHRS11	DHR11_HUMAN Dehydrogenase/reductase SDR family member 11	3	6.17974	5.32267	6.52722	6.85341	6.11821	6.0278	6.86282	7.25051	6.22076	6.56484	1.05531	0.0776679	0.105918	0.0899814
sp|Q9UGM6|SYWM_HUMAN	WARS2	SYWM_HUMAN Tryptophan--tRNA ligase, mitochondrial	3	5.92494	5.84081	6.43061	6.27446	6.14145	6.31386	6.87952	6.48936	6.1177	6.45605	1.05531	0.0776607	0.0458768	0.0489512
sp|Q14315|FLNC_HUMAN	FLNC	FLNC_HUMAN Filamin-C	86	5.94834	5.95564	6.20513	6.25664	6.30994	6.31458	6.57052	6.51757	6.09144	6.42815	1.05528	0.0776214	0.0266628	0.0210899
sp|O15554|KCNN4_HUMAN	KCNN4	KCNN4_HUMAN Intermediate conductance calcium-activated potassium channel protein 4	2	5.77556	6.86673	6.18774	6.70705	6.5732	7.15194	6.67995	6.54052	6.38427	6.7364	1.05516	0.0774567	0.0781139	0.0420627
sp|Q8TAS1|UHMK1_HUMAN	UHMK1	UHMK1_HUMAN Serine/threonine-protein kinase Kist	1	7.4108	6.03459	5.82545	6.04221	7.54526	4.96818	7.33875	6.85685	6.32826	6.67726	1.05515	0.0774468	0.115142	0.17602
sp|Q93050-3|VPP1_HUMAN	ATP6V0A1	VPP1_HUMAN Isoform 3 of V-type proton ATPase 116 kDa subunit a isoform 1	16	5.86585	5.9292	6.59413	6.5148	6.31905	6.38067	6.73174	6.8455	6.226	6.56924	1.05513	0.0774221	0.0612821	0.0393906
sp|Q9BXI6-2|TB10A_HUMAN	TBC1D10A	TB10A_HUMAN Isoform 2 of TBC1 domain family member 10A	8	5.97066	5.53751	6.51668	6.45046	6.24172	6.05198	6.68855	6.84128	6.11883	6.45588	1.05508	0.0773591	0.074783	0.0573796
sp|Q92499|DDX1_HUMAN	DDX1	DDX1_HUMAN ATP-dependent RNA helicase DDX1	43	5.92003	5.92992	6.12682	6.29366	6.33053	6.26257	6.46411	6.54882	6.06761	6.40151	1.05503	0.0772839	0.029381	0.0201593
sp|Q14152|EIF3A_HUMAN	EIF3A	EIF3A_HUMAN Eukaryotic translation initiation factor 3 subunit A	71	6.1156	5.94465	6.15941	6.08455	6.43302	6.71138	6.44289	6.05421	6.07605	6.41038	1.05502	0.0772744	0.0152777	0.0421507
sp|O43396|TXNL1_HUMAN	TXNL1	TXNL1_HUMAN Thioredoxin-like protein 1	34	5.89603	6.06487	5.91899	6.06237	6.33193	6.44001	6.1984	6.28847	5.98556	6.3147	1.05499	0.0772273	0.0151401	0.0158922
sp|Q15833|STXB2_HUMAN	STXBP2	STXB2_HUMAN Syntaxin-binding protein 2	18	5.90548	5.80058	6.37681	6.51056	6.43202	6.07292	6.61228	6.82681	6.14836	6.48601	1.05492	0.0771296	0.0566011	0.0492121
sp|Q13563|PKD2_HUMAN	PKD2	PKD2_HUMAN Polycystin-2	1	5.27834	6.28602	6.97645	6.73138	6.75858	6.68308	7.16182	6.05657	6.31805	6.66501	1.05492	0.0771288	0.118667	0.0685426
sp|P31321|KAP1_HUMAN	PRKAR1B	KAP1_HUMAN cAMP-dependent protein kinase type I-beta regulatory subunit	9	6.03615	5.96848	6.14785	6.2781	6.24605	6.17798	6.5355	6.81242	6.10764	6.44299	1.05491	0.0771136	0.0221992	0.0451662
sp|Q6PJ69|TRI65_HUMAN	TRIM65	TRI65_HUMAN Tripartite motif-containing protein 65	9	5.97674	6.10266	6.31707	6.32267	6.08715	6.61751	6.7281	6.64142	6.17978	6.51855	1.05482	0.0769933	0.0274676	0.0447177
sp|Q8TBB5|KLDC4_HUMAN	KLHDC4	KLDC4_HUMAN Kelch domain-containing protein 4	11	6.10014	5.71361	6.19676	6.45936	6.70876	6.45347	6.14072	6.50805	6.11747	6.45275	1.05481	0.0769796	0.0505231	0.0364502
sp|P38919|IF4A3_HUMAN	EIF4A3	IF4A3_HUMAN Eukaryotic initiation factor 4A-III	51	6.0416	5.73818	6.18653	6.26813	6.23825	6.18839	6.46568	6.67019	6.05861	6.39063	1.0548	0.0769708	0.0385001	0.0347448
sp|Q9BYD3|RM04_HUMAN	MRPL4	RM04_HUMAN 39S ribosomal protein L4, mitochondrial	18	6.22196	5.98655	6.24519	6.18774	6.51617	6.24436	6.62153	6.60962	6.16036	6.49792	1.0548	0.0769633	0.0191956	0.0270059
sp|P50749|RASF2_HUMAN	RASSF2	RASF2_HUMAN Ras association domain-containing protein 2	2	5.12952	5.266	6.56243	6.92028	6.72817	6.14903	6.10897	6.20022	5.96956	6.2966	1.05478	0.0769485	0.15157	0.046077
sp|Q56NI9|ESCO2_HUMAN	ESCO2	ESCO2_HUMAN N-acetyltransferase ESCO2	1	5.66033	5.23001	7.06641	7.26037	6.23484	7.43416	6.40215	6.52483	6.30428	6.64899	1.05468	0.0768047	0.160297	0.0807291
sp|P42285|SK2L2_HUMAN	SKIV2L2	SK2L2_HUMAN Superkiller viralicidic activity 2-like 2	38	5.86652	5.96124	6.19245	6.35265	6.32953	6.41698	6.38209	6.57509	6.09322	6.42592	1.0546	0.0766999	0.0362004	0.0164554
sp|Q9Y3B7|RM11_HUMAN	MRPL11	RM11_HUMAN 39S ribosomal protein L11, mitochondrial	12	6.0311	5.56032	6.05953	6.38832	6.17343	5.69124	6.53105	6.95606	6.00982	6.33795	1.0546	0.076694	0.0566911	0.0847053
sp|P27707|DCK_HUMAN	DCK	DCK_HUMAN Deoxycytidine kinase	12	6.05817	5.9647	5.64245	6.17509	6.17465	6.1511	6.22852	6.58759	5.9601	6.28546	1.05459	0.0766823	0.0383535	0.0324569
sp|O75145|LIPA3_HUMAN	PPFIA3	LIPA3_HUMAN Liprin-alpha-3	4	6.27625	5.42879	6.31739	6.58521	6.06073	6.3909	6.58035	6.91821	6.15191	6.48755	1.05456	0.0766388	0.0814647	0.0552618
sp|A0AVT1|UBA6_HUMAN	UBA6	UBA6_HUMAN Ubiquitin-like modifier-activating enzyme 6	53	5.89813	5.80985	6.01344	6.30122	6.02237	6.00446	6.66246	6.64346	6.00566	6.33319	1.05454	0.076609	0.0356243	0.0583269
sp|P30154-2|2AAB_HUMAN	PPP2R1B	2AAB_HUMAN Isoform 2 of Serine/threonine-protein phosphatase 2A 65 kDa regulatory subunit A beta isoform	28	5.97682	5.73636	6.14233	6.3911	6.01755	6.27294	6.85327	6.42483	6.06165	6.39215	1.05452	0.0765896	0.0454851	0.0548095
sp|P42336|PK3CA_HUMAN	PIK3CA	PK3CA_HUMAN Phosphatidylinositol 4,5-bisphosphate 3-kinase catalytic subunit alpha isoform	10	6.2293	5.57461	5.68825	6.1956	5.70341	6.30958	6.25743	6.70854	5.92194	6.24474	1.05451	0.0765716	0.057232	0.0661878
sp|Q15554-3|TERF2_HUMAN	TERF2	TERF2_HUMAN Isoform 3 of Telomeric repeat-binding factor 2	16	5.84998	5.77238	6.34905	6.41945	6.28271	6.4558	6.54198	6.43922	6.09771	6.42993	1.05448	0.0765337	0.0547116	0.0167947
sp|Q12972|PP1R8_HUMAN	PPP1R8	PP1R8_HUMAN Nuclear inhibitor of protein phosphatase 1	18	6.09011	6.30726	6.07391	6.24198	6.53347	6.65776	6.40108	6.46635	6.17831	6.51467	1.05444	0.0764776	0.0185396	0.0168304
sp|P49903|SPS1_HUMAN	SEPHS1	SPS1_HUMAN Selenide, water dikinase 1	19	6.05436	6.06627	6.06338	6.0445	6.37338	6.75113	6.49529	5.92652	6.05713	6.38658	1.05439	0.0764098	0.00162262	0.0539793
sp|Q9Y3L3|3BP1_HUMAN	SH3BP1	3BP1_HUMAN SH3 domain-binding protein 1	20	6.18473	5.80605	6.26405	6.18441	6.09046	6.54525	6.63395	6.49864	6.10981	6.44207	1.05438	0.0763979	0.033707	0.0374158
sp|Q9NVU0|RPC5_HUMAN	POLR3E	RPC5_HUMAN DNA-directed RNA polymerase III subunit RPC5	6	6.24585	5.80407	6.11748	5.88498	6.55451	6.65258	6.19492	5.95799	6.01309	6.34	1.05437	0.0763751	0.0339705	0.05076
sp|O00505|IMA4_HUMAN	KPNA3	IMA4_HUMAN Importin subunit alpha-4	8	5.8816	5.76251	6.10436	6.46759	6.23887	6.16599	6.88019	6.24531	6.05401	6.38259	1.05427	0.0762497	0.051204	0.0522794
sp|P13693|TCTP_HUMAN	TPT1	TCTP_HUMAN Translationally-controlled tumor protein	32	6.23698	5.98555	5.8614	6.35046	6.48102	6.32591	6.54659	6.40631	6.1086	6.43996	1.05424	0.07621	0.0367546	0.0147845
sp|Q9P2W1|HOP2_HUMAN	PSMC3IP	HOP2_HUMAN Homologous-pairing protein 2 homolog	8	6.15227	6.06889	6.07235	6.11449	6.46994	6.9298	6.35649	5.97531	6.102	6.43289	1.05423	0.0761837	0.00645786	0.061103
sp|Q9Y3I0|RTCB_HUMAN	RTCB	RTCB_HUMAN tRNA-splicing ligase RtcB homolog	24	5.96116	5.93432	6.19977	6.23484	6.33952	6.41494	6.44937	6.44499	6.08252	6.41221	1.0542	0.0761508	0.0257581	0.00792483
sp|Q53ET0|CRTC2_HUMAN	CRTC2	CRTC2_HUMAN CREB-regulated transcription coactivator 2	5	6.30408	6.48515	5.91515	6.05429	7.09663	6.88561	6.50731	5.61017	6.18967	6.52493	1.05416	0.0761005	0.0410932	0.100655
sp|Q86SQ9-2|DHDDS_HUMAN	DHDDS	DHDDS_HUMAN Isoform 2 of Dehydrodolichyl diphosphate synthase	2	6.43009	5.95046	6.27129	6.43648	5.90584	5.99097	7.05207	7.4981	6.27208	6.61174	1.05416	0.0760871	0.0362912	0.119193
sp|Q9ULC4-3|MCTS1_HUMAN	MCTS1	MCTS1_HUMAN Isoform 3 of Malignant T-cell-amplified sequence 1	15	6.07146	6.06377	6.03971	6.35058	6.24927	6.68406	6.74824	6.17184	6.13138	6.46335	1.05414	0.0760709	0.0239355	0.0456077
sp|P27701|CD82_HUMAN	CD82	CD82_HUMAN CD82 antigen	1	5.95003	6.1809	5.45086	6.31058	6.95896	7.18485	5.76916	5.27295	5.97309	6.29648	1.05414	0.0760675	0.0634083	0.146532
sp|Q96QK1|VPS35_HUMAN	VPS35	VPS35_HUMAN Vacuolar protein sorting-associated protein 35	31	6.00128	6.04321	6.14088	6.22431	6.44924	6.34015	6.46004	6.48048	6.10242	6.43248	1.05409	0.075993	0.0164064	0.00977852
sp|Q9UHB9|SRP68_HUMAN	SRP68	SRP68_HUMAN Signal recognition particle subunit SRP68	33	5.97353	5.77837	6.16331	6.32303	6.1391	6.34391	6.70075	6.36362	6.05956	6.38685	1.05401	0.0758904	0.0388956	0.0364173
sp|Q9UNH6-3|SNX7_HUMAN	SNX7	SNX7_HUMAN Isoform 3 of Sorting nexin-7	6	5.92997	5.91719	6.30434	6.55801	6.24019	6.22595	6.99516	6.58181	6.17738	6.51078	1.05397	0.0758353	0.0503229	0.0556626
sp|P0CG08|GPHRB_HUMAN	GPR89B	GPHRB_HUMAN Golgi pH regulator B	6	5.87882	5.50483	6.39228	6.62885	6.20474	6.60327	7.00447	5.90896	6.10119	6.43036	1.05395	0.0758077	0.0829424	0.0741617
sp|Q9Y5Y6|ST14_HUMAN	ST14	ST14_HUMAN Suppressor of tumorigenicity 14 protein	21	5.85935	6.14494	6.13544	6.13822	6.34881	6.57919	6.16342	6.49603	6.06949	6.39686	1.05394	0.0757898	0.0230907	0.0285244
sp|Q9ULV8|CBLC_HUMAN	CBLC	CBLC_HUMAN E3 ubiquitin-protein ligase CBL-C	5	5.69596	5.85028	6.91182	6.49027	6.91573	6.5129	6.33252	6.53229	6.23708	6.57336	1.05392	0.0757597	0.0907823	0.0373222
sp|Q13033|STRN3_HUMAN	STRN3	STRN3_HUMAN Striatin-3	18	6.02198	5.85522	6.21924	6.28423	6.26657	6.17776	6.53989	6.71074	6.09517	6.42374	1.05391	0.0757476	0.0319918	0.0382448
sp|Q01804|OTUD4_HUMAN	OTUD4	OTUD4_HUMAN OTU domain-containing protein 4	12	5.83385	5.97253	6.31116	6.33165	6.27609	6.21512	6.52905	6.7464	6.1123	6.44167	1.05389	0.0757189	0.0405979	0.0379451
sp|Q5VTE6|ANGE2_HUMAN	ANGEL2	ANGE2_HUMAN Protein angel homolog 2	2	5.79659	5.31859	6.60356	6.99598	6.80891	5.84464	6.71687	6.67482	6.17868	6.51131	1.05384	0.0756492	0.123055	0.0687973
sp|P32322|P5CR1_HUMAN	PYCR1	P5CR1_HUMAN Pyrroline-5-carboxylate reductase 1, mitochondrial	30	6.20488	6.01326	5.76201	5.95049	6.67582	6.47134	5.85926	6.2125	5.98266	6.30473	1.05383	0.0756475	0.0305232	0.055884
sp|Q86VZ4|LRP11_HUMAN	LRP11	LRP11_HUMAN Low-density lipoprotein receptor-related protein 11	1	6.73904	6.20792	5.62649	4.28153	5.90727	5.58438	5.79982	6.79295	5.71375	6.02111	1.05379	0.0755916	0.185063	0.0883208
sp|O00459|P85B_HUMAN	PIK3R2	P85B_HUMAN Phosphatidylinositol 3-kinase regulatory subunit beta	16	5.80214	5.8588	6.48874	6.53535	6.16924	6.04194	6.94159	6.85929	6.17126	6.50301	1.05376	0.0755443	0.063949	0.0712071
sp|Q02790|FKBP4_HUMAN	FKBP4	FKBP4_HUMAN Peptidyl-prolyl cis-trans isomerase FKBP4	112	6.19252	6.13354	5.9772	6.11955	6.40154	6.39812	6.47058	6.46457	6.1057	6.4337	1.05372	0.0754919	0.0149562	0.00609514
sp|Q96GX5|GWL_HUMAN	MASTL	GWL_HUMAN Serine/threonine-protein kinase greatwall	4	5.65649	6.04264	6.469	6.72807	6.24853	6.32885	6.97487	6.68137	6.22405	6.55841	1.05372	0.0754913	0.0758756	0.0511255
sp|Q5W0V3|F16B1_HUMAN	FAM160B1	F16B1_HUMAN Protein FAM160B1	13	5.68688	5.6124	6.41843	6.52915	5.88363	6.28226	6.6699	6.71245	6.06171	6.38706	1.05367	0.075426	0.0790093	0.0606583
sp|Q9Y490|TLN1_HUMAN	TLN1	TLN1_HUMAN Talin-1	117	6.06048	6.06871	6.2631	6.31456	6.39413	6.33648	6.60683	6.69467	6.17671	6.50803	1.05364	0.0753812	0.0212409	0.0261665
sp|P48507|GSH0_HUMAN	GCLM	GSH0_HUMAN Glutamate--cysteine ligase regulatory subunit	11	5.61428	6.05661	6.2674	6.63788	6.49954	6.18275	6.42542	6.78595	6.14404	6.47342	1.05361	0.0753388	0.0695235	0.0383767
sp|P21912|DHSB_HUMAN	SDHB	DHSB_HUMAN Succinate dehydrogenase [ubiquinone] iron-sulfur subunit, mitochondrial	21	6.12655	5.96074	6.10918	6.16132	6.38092	6.29797	6.46972	6.51496	6.08945	6.41589	1.05361	0.0753386	0.0145335	0.0150149
sp|Q7L576|CYFP1_HUMAN	CYFIP1	CYFP1_HUMAN Cytoplasmic FMR1-interacting protein 1	26	5.79481	5.73231	6.25592	6.35564	6.00677	6.0733	6.65644	6.69593	6.03467	6.35811	1.0536	0.0753231	0.0524828	0.057979
sp|Q4KMP7|TB10B_HUMAN	TBC1D10B	TB10B_HUMAN TBC1 domain family member 10B	12	6.17601	5.91567	6.56187	6.15136	6.64538	6.45821	6.41099	6.61917	6.20123	6.53344	1.05357	0.0752884	0.0431427	0.0177912
sp|P20936|RASA1_HUMAN	RASA1	RASA1_HUMAN Ras GTPase-activating protein 1	7	6.15854	5.83259	6.26868	6.32189	6.45824	6.17869	6.66875	6.59269	6.14543	6.47459	1.05356	0.0752766	0.0356965	0.0333018
sp|O75533|SF3B1_HUMAN	SF3B1	SF3B1_HUMAN Splicing factor 3B subunit 1	61	5.91402	5.82471	6.18102	6.47638	6.26686	6.19877	6.59168	6.64496	6.09903	6.42557	1.05354	0.0752435	0.0481381	0.0350713
sp|Q9NP80|PLPL8_HUMAN	PNPLA8	PLPL8_HUMAN Calcium-independent phospholipase A2-gamma	2	5.76308	5.2015	6.58939	6.82289	6.91523	6.08556	6.25773	6.42184	6.09422	6.42009	1.05347	0.0751531	0.122894	0.055686
sp|Q9BTE6-3|AASD1_HUMAN	AARSD1	AASD1_HUMAN Isoform 3 of Alanyl-tRNA editing protein Aarsd1	13	5.92804	5.85506	6.23199	6.33742	6.39219	5.85953	6.82041	6.5822	6.08813	6.41358	1.05346	0.0751319	0.0382624	0.063741
sp|Q13057-2|COASY_HUMAN	COASY	COASY_HUMAN Isoform 2 of Bifunctional coenzyme A synthase	6	5.74576	5.6884	6.34269	6.28146	6.14875	6.32661	6.3455	6.52342	6.01458	6.33607	1.05345	0.0751249	0.0573979	0.0241716
sp|Q9BRJ6|CG050_HUMAN	C7orf50	CG050_HUMAN Uncharacterized protein C7orf50	6	6.2681	6.01472	6.37982	6.24245	6.98483	6.09296	6.66168	6.4941	6.22627	6.55839	1.05334	0.0749735	0.0245935	0.0565931
sp|O75143-5|ATG13_HUMAN	ATG13	ATG13_HUMAN Isoform 5 of Autophagy-related protein 13	6	5.73071	6.51282	6.17101	5.8592	6.57017	7.15727	5.82131	6.01785	6.06844	6.39165	1.05326	0.0748639	0.0575449	0.0940053
sp|O95376|ARI2_HUMAN	ARIH2	ARI2_HUMAN E3 ubiquitin-protein ligase ARIH2	14	6.25488	6.17209	5.97172	6.20196	6.06211	6.28098	6.64068	6.92675	6.15016	6.47763	1.05325	0.0748415	0.0201278	0.0590967
sp|P62910|RL32_HUMAN	RPL32	RL32_HUMAN 60S ribosomal protein L32	23	6.50524	6.56009	5.89558	5.40822	6.67236	7.44094	6.33994	5.21293	6.09228	6.41654	1.05322	0.0748133	0.0897049	0.144229
sp|Q8WVY7|UBCP1_HUMAN	UBLCP1	UBCP1_HUMAN Ubiquitin-like domain-containing CTD phosphatase 1	13	5.95579	5.92458	6.33786	6.5785	6.1898	6.12114	6.90756	6.89768	6.19918	6.52904	1.05321	0.074794	0.0508204	0.0662112
sp|Q9UEG4|ZN629_HUMAN	ZNF629	ZN629_HUMAN Zinc finger protein 629	4	6.00579	6.21258	5.16971	6.65333	6.64123	6.29109	6.07845	6.30877	6.01035	6.32988	1.05316	0.0747297	0.103504	0.0367234
sp|Q68D10|SPT2_HUMAN	SPTY2D1	SPT2_HUMAN Protein SPT2 homolog	4	6.54654	5.70439	5.07876	6.37151	6.67429	5.94634	5.96452	6.37592	5.9253	6.24027	1.05316	0.0747197	0.113233	0.0562175
sp|Q9BQ75|CMS1_HUMAN	CMSS1	CMS1_HUMAN Protein CMSS1	7	6.06382	5.95892	6.54766	6.67319	6.63111	6.7245	6.49216	6.73725	6.3109	6.64625	1.05314	0.0746965	0.0558167	0.0170176
tr|A2ABJ5|A2ABJ5_HUMAN	FLOT1	A2ABJ5_HUMAN Flotillin-1 (Fragment)	1	6.29351	6.22106	6.38709	6.87608	7.08704	6.01551	6.78769	7.25709	6.44444	6.78683	1.05313	0.0746845	0.0458815	0.0809815
sp|Q9NZJ5|E2AK3_HUMAN	EIF2AK3	E2AK3_HUMAN Eukaryotic translation initiation factor 2-alpha kinase 3	1	6.11443	6.32276	5.48999	5.97145	5.72524	5.85108	6.9011	6.6908	5.97466	6.29205	1.05312	0.0746753	0.0592248	0.0938306
sp|Q15036|SNX17_HUMAN	SNX17	SNX17_HUMAN Sorting nexin-17	8	5.65347	5.95271	6.27195	6.43182	6.21139	6.36741	6.48734	6.53512	6.07749	6.40031	1.05312	0.0746679	0.0568981	0.0225554
sp|P36873-2|PP1G_HUMAN	PPP1CC	PP1G_HUMAN Isoform Gamma-2 of Serine/threonine-protein phosphatase PP1-gamma catalytic subunit	42	6.22017	6.04767	6.26008	6.03839	6.40476	6.14469	6.60932	6.71241	6.14158	6.4678	1.05312	0.0746647	0.0187274	0.0387288
sp|Q9BVI4|NOC4L_HUMAN	NOC4L	NOC4L_HUMAN Nucleolar complex protein 4 homolog	9	5.53807	5.33126	6.94357	6.5539	5.98268	6.30245	6.66185	6.71377	6.0917	6.41519	1.0531	0.0746465	0.128004	0.0532254
sp|P02751-15|FINC_HUMAN	FN1	FINC_HUMAN Isoform 15 of Fibronectin	1	5.2644	6.46103	6.6626	6.50838	6.54006	6.54004	6.38595	6.75183	6.2241	6.55447	1.05308	0.0746133	0.10372	0.0229302
sp|Q8TD30|ALAT2_HUMAN	GPT2	ALAT2_HUMAN Alanine aminotransferase 2	20	5.70426	5.82088	6.11144	6.34445	6.1593	6.02434	6.52798	6.54147	5.99526	6.31327	1.05304	0.0745663	0.0482007	0.0414425
sp|P52732|KIF11_HUMAN	KIF11	KIF11_HUMAN Kinesin-like protein KIF11	31	5.6698	5.78014	6.40141	6.70968	6.06372	5.95855	6.87889	6.96197	6.14026	6.46578	1.05301	0.0745258	0.0810739	0.0816336
sp|P60604|UB2G2_HUMAN	UBE2G2	UB2G2_HUMAN Ubiquitin-conjugating enzyme E2 G2	2	6.1662	5.72904	5.50293	7.07928	6.99623	6.02698	6.93381	5.81795	6.11936	6.44374	1.05301	0.0745175	0.113844	0.0944284
tr|J3KQV4|J3KQV4_HUMAN	SLC35B1	J3KQV4_HUMAN Solute carrier family 35 member B1	2	6.00613	5.64378	6.57794	6.35972	6.03878	6.57987	6.7658	6.50529	6.14689	6.47243	1.05296	0.0744513	0.0666828	0.0477658
sp|Q9NSD9|SYFB_HUMAN	FARSB	SYFB_HUMAN Phenylalanine--tRNA ligase beta subunit	36	5.77482	5.69814	6.07591	6.45244	6.17374	6.04648	6.57039	6.48171	6.00033	6.31808	1.05296	0.074445	0.0571103	0.0393081
sp|Q9BYG4|PAR6G_HUMAN	PARD6G	PAR6G_HUMAN Partitioning defective 6 homolog gamma	2	5.66932	5.8236	6.28825	6.49838	6.39347	6.45807	5.73216	6.98085	6.06989	6.39114	1.05293	0.0744029	0.0639764	0.0801143
sp|Q6P2Q9|PRP8_HUMAN	PRPF8	PRP8_HUMAN Pre-mRNA-processing-splicing factor 8	92	5.9734	5.81129	6.27689	6.30815	6.29264	6.35856	6.55871	6.4491	6.09243	6.41475	1.0529	0.0743752	0.0395034	0.0179945
sp|Q16828|DUS6_HUMAN	DUSP6	DUS6_HUMAN Dual specificity protein phosphatase 6	1	5.45069	6.51043	5.7135	7.4489	5.08338	7.65873	7.8069	5.90361	6.28088	6.61315	1.0529	0.074372	0.143236	0.202158
sp|Q92905|CSN5_HUMAN	COPS5	CSN5_HUMAN COP9 signalosome complex subunit 5	22	6.1742	6.11309	5.81925	5.9858	6.38085	6.34249	6.51709	6.12479	6.02309	6.34131	1.05283	0.0742771	0.0260538	0.0256459
sp|P42226|STAT6_HUMAN	STAT6	STAT6_HUMAN Signal transducer and activator of transcription 6	6	5.61977	5.88858	6.16961	6.91403	6.03823	6.17591	6.91308	6.7627	6.148	6.47248	1.05278	0.074202	0.0907371	0.0664461
sp|P49593|PPM1F_HUMAN	PPM1F	PPM1F_HUMAN Protein phosphatase 1F	4	6.07838	6.08846	5.99601	6.69902	6.25451	6.15363	6.90093	6.86407	6.21547	6.54328	1.05274	0.0741522	0.0522917	0.0602355
sp|Q5SW96|ARH_HUMAN	LDLRAP1	ARH_HUMAN Low density lipoprotein receptor adapter protein 1	1	4.76234	5.43067	6.33715	7.31292	4.35417	7.32883	6.01582	7.40124	5.96077	6.27501	1.05272	0.0741202	0.185988	0.227907
sp|O60568|PLOD3_HUMAN	PLOD3	PLOD3_HUMAN Procollagen-lysine,2-oxoglutarate 5-dioxygenase 3	23	6.04876	6.12371	6.11088	6.32779	6.28729	6.30895	6.40752	6.90463	6.15278	6.4771	1.05271	0.0741079	0.0196942	0.0447399
sp|Q9NWS1|PARI_HUMAN	PARPBP	PARI_HUMAN PCNA-interacting partner	1	6.77427	5.44744	5.91501	6.05175	6.45232	5.85922	7.23782	5.91181	6.04712	6.36529	1.05262	0.0739792	0.0908691	0.10062
sp|P29084|T2EB_HUMAN	GTF2E2	T2EB_HUMAN Transcription initiation factor IIE subunit beta	5	6.19046	5.99973	6.25967	6.00226	6.74423	6.35251	6.45949	6.18211	6.11303	6.43459	1.0526	0.0739595	0.021662	0.036665
sp|O43399-3|TPD54_HUMAN	TPD52L2	TPD54_HUMAN Isoform 3 of Tumor protein D54	1	4.89671	4.79231	7.35996	5.81399	5.61485	6.02471	5.58334	6.84264	5.71574	6.01638	1.0526	0.073956	0.207911	0.0974639
sp|Q9Y2K1|ZBTB1_HUMAN	ZBTB1	ZBTB1_HUMAN Zinc finger and BTB domain-containing protein 1	2	6.00825	5.88988	5.99375	5.80617	6.47154	6.20196	6.6199	5.65095	5.92451	6.23609	1.05259	0.0739447	0.0160159	0.0684294
sp|P62273|RS29_HUMAN	RPS29	RS29_HUMAN 40S ribosomal protein S29	6	7.3771	6.05493	5.48835	5.53648	6.72213	6.06564	5.5799	7.3752	6.11422	6.43572	1.05258	0.0739337	0.143948	0.121492
sp|Q96IJ6-2|GMPPA_HUMAN	GMPPA	GMPPA_HUMAN Isoform 2 of Mannose-1-phosphate guanyltransferase alpha	14	5.56273	5.52153	6.49786	6.55824	6.21573	6.46764	6.31478	6.41101	6.03509	6.35229	1.05256	0.0739015	0.0944481	0.0174376
sp|O95049-4|ZO3_HUMAN	TJP3	ZO3_HUMAN Isoform 4 of Tight junction protein ZO-3	6	6.16629	6.29183	6.20795	6.42831	6.71204	7.0384	6.05454	6.60819	6.2736	6.60329	1.05255	0.0738932	0.0184271	0.0619669
sp|Q658Y4|F91A1_HUMAN	FAM91A1	F91A1_HUMAN Protein FAM91A1	11	6.06721	5.82373	6.29105	6.4329	6.64116	6.21171	6.33886	6.71655	6.15372	6.47707	1.05255	0.0738819	0.0433185	0.0371602
sp|Q15059|BRD3_HUMAN	BRD3	BRD3_HUMAN Bromodomain-containing protein 3	2	5.78187	5.99629	6.09952	6.63203	7.12338	5.39777	6.8874	6.38858	6.12743	6.44928	1.05253	0.0738572	0.0589942	0.118619
sp|Q8IW50|F219A_HUMAN	FAM219A	F219A_HUMAN Protein FAM219A	2	5.45447	6.49683	6.12258	6.55568	6.09463	6.88364	6.40817	6.53627	6.15739	6.48068	1.0525	0.0738257	0.0822341	0.0503768
sp|O00534|VMA5A_HUMAN	VWA5A	VMA5A_HUMAN von Willebrand factor A domain-containing protein 5A	4	6.00401	6.36854	5.78676	6.53197	6.57478	6.69536	6.8075	5.90931	6.17282	6.49674	1.05247	0.0737857	0.0549238	0.0620285
sp|O95759|TBCD8_HUMAN	TBC1D8	TBCD8_HUMAN TBC1 domain family member 8	4	5.35348	5.7981	6.46818	6.49726	6.15206	6.34389	6.66826	6.21801	6.02926	6.34556	1.05246	0.0737666	0.0919372	0.0361486
sp|O75164|KDM4A_HUMAN	KDM4A	KDM4A_HUMAN Lysine-specific demethylase 4A	5	5.595	5.84787	6.53427	6.53264	6.2799	6.31716	6.80229	6.39556	6.12744	6.44873	1.05243	0.0737289	0.0783445	0.0373076
sp|P10644|KAP0_HUMAN	PRKAR1A	KAP0_HUMAN cAMP-dependent protein kinase type I-alpha regulatory subunit	27	5.85605	5.8316	6.14167	6.41992	6.21732	5.99191	6.47288	6.83743	6.06231	6.37989	1.05239	0.0736628	0.0456689	0.0568717
sp|P54652|HSP72_HUMAN	HSPA2	HSP72_HUMAN Heat shock-related 70 kDa protein 2	5	6.12296	6.54386	5.91756	6.0087	6.36352	6.61855	6.52686	6.37241	6.14827	6.47034	1.05238	0.0736599	0.0450192	0.0191713
sp|P49137|MAPK2_HUMAN	MAPKAPK2	MAPK2_HUMAN MAP kinase-activated protein kinase 2	14	5.67443	5.87287	6.22701	6.60456	5.67775	6.15036	6.92618	6.90087	6.09472	6.41379	1.05235	0.0736178	0.0672045	0.094879
sp|Q8N488|RYBP_HUMAN	RYBP	RYBP_HUMAN RING1 and YY1-binding protein	2	6.9931	7.13665	5.12748	5.73864	6.60773	6.88736	6.30627	6.50264	6.24897	6.576	1.05233	0.0735925	0.156245	0.0368419
sp|Q13263|TIF1B_HUMAN	TRIM28	TIF1B_HUMAN Transcription intermediary factor 1-beta	105	5.92541	5.99221	6.09383	6.32645	6.20474	6.26274	6.55289	6.59017	6.08448	6.40264	1.05229	0.073533	0.0288522	0.0307755
sp|A6NF01|P121B_HUMAN	POM121B	P121B_HUMAN Putative nuclear envelope pore membrane protein POM 121B	3	5.81542	5.99963	6.54472	5.85268	6.37658	6.49495	6.01833	6.58667	6.05311	6.36913	1.05221	0.0734197	0.0557149	0.0391229
sp|Q9H8Y8|GORS2_HUMAN	GORASP2	GORS2_HUMAN Golgi reassembly-stacking protein 2	13	5.96901	6.0498	5.90476	6.03483	6.14473	6.53307	6.27009	6.26027	5.9896	6.30204	1.05216	0.0733593	0.011113	0.0260554
sp|Q9UK59|DBR1_HUMAN	DBR1	DBR1_HUMAN Lariat debranching enzyme	18	6.01307	6.05815	6.09366	6.45017	6.33812	6.55455	6.50313	6.50318	6.15376	6.47474	1.05216	0.0733546	0.0325554	0.0145566
sp|Q86WX3|AROS_HUMAN	RPS19BP1	AROS_HUMAN Active regulator of SIRT1	2	6.92591	5.82922	6.15421	5.97238	6.53725	6.83863	6.5995	6.20356	6.22043	6.54474	1.05214	0.0733205	0.0785735	0.0400223
tr|M0R2Z6|M0R2Z6_HUMAN	ZNF320	M0R2Z6_HUMAN Zinc finger protein 320	1	5.28737	5.37119	5.71675	8.40482	5.79839	7.3526	6.34195	6.57908	6.19503	6.51801	1.05213	0.0733186	0.239687	0.0989981
sp|Q9P032|NDUF4_HUMAN	NDUFAF4	NDUF4_HUMAN NADH dehydrogenase [ubiquinone] 1 alpha subcomplex assembly factor 4	15	6.07336	5.92576	6.1091	6.22551	6.25818	6.20214	6.45994	6.68186	6.08343	6.40053	1.05212	0.0733058	0.0203122	0.034027
sp|Q01167|FOXK2_HUMAN	FOXK2	FOXK2_HUMAN Forkhead box protein K2	11	5.83318	5.84413	6.39756	6.44327	6.20323	6.34835	6.53512	6.70936	6.12953	6.44902	1.05212	0.0733012	0.0548862	0.0341768
sp|Q00059|TFAM_HUMAN	TFAM	TFAM_HUMAN Transcription factor A, mitochondrial	5	5.89091	6.20702	6.30528	6.48061	6.44919	6.14251	6.57938	7.00814	6.22096	6.54481	1.05206	0.0732141	0.0397726	0.0548679
sp|Q05397-5|FAK1_HUMAN	PTK2	FAK1_HUMAN Isoform 5 of Focal adhesion kinase 1	32	5.9981	5.89606	6.25096	6.37474	6.24873	6.19034	6.74662	6.61013	6.12996	6.44895	1.05204	0.0731866	0.0360686	0.0421395
sp|Q9UPR0|PLCL2_HUMAN	PLCL2	PLCL2_HUMAN Inactive phospholipase C-like protein 2	1	6.17683	6.0773	6.67397	5.87676	6.42504	6.36045	7.01059	6.29893	6.20122	6.52375	1.05201	0.0731511	0.0546631	0.0503724
sp|O00400|ACATN_HUMAN	SLC33A1	ACATN_HUMAN Acetyl-coenzyme A transporter 1	3	6.03423	5.60479	6.86688	6.27626	6.33317	6.56431	7.08459	6.08903	6.19554	6.51778	1.05201	0.0731495	0.0850118	0.0651745
sp|Q9Y385|UB2J1_HUMAN	UBE2J1	UB2J1_HUMAN Ubiquitin-conjugating enzyme E2 J1	3	5.84478	5.65733	6.2873	6.80922	5.49853	6.07735	6.71904	7.58179	6.14966	6.46918	1.05196	0.0730762	0.0834086	0.138145
sp|Q8WUX2|CHAC2_HUMAN	CHAC2	CHAC2_HUMAN Cation transport regulator-like protein 2	6	6.0347	6.13499	5.87261	6.48366	6.01621	6.56375	6.52678	6.69348	6.13149	6.45005	1.05196	0.0730738	0.0421548	0.0461906
sp|Q92759|TF2H4_HUMAN	GTF2H4	TF2H4_HUMAN General transcription factor IIH subunit 4	5	6.01726	5.67124	6.54334	6.34644	6.50003	6.52944	6.76899	6.05613	6.14457	6.46365	1.05193	0.0730365	0.062328	0.0459779
sp|Q9GZM5|YIPF3_HUMAN	YIPF3	YIPF3_HUMAN Protein YIPF3	7	5.96911	5.8396	6.1907	6.06052	6.14424	6.35758	6.5026	6.30433	6.01498	6.32719	1.0519	0.0730038	0.0246242	0.0233864
sp|P05362|ICAM1_HUMAN	ICAM1	ICAM1_HUMAN Intercellular adhesion molecule 1	6	5.89107	5.34047	6.30046	6.83054	6.64433	6.38975	6.06583	6.52572	6.09063	6.40641	1.05185	0.0729229	0.103583	0.0389831
sp|Q9UIC8-2|LCMT1_HUMAN	LCMT1	LCMT1_HUMAN Isoform 2 of Leucine carboxyl methyltransferase 1	16	5.97427	5.92357	6.29077	6.40584	6.28551	6.30182	6.66963	6.61157	6.14861	6.46713	1.0518	0.0728653	0.0384201	0.0312056
sp|Q9UIV1|CNOT7_HUMAN	CNOT7	CNOT7_HUMAN CCR4-NOT transcription complex subunit 7	3	5.58335	5.86575	6.23298	6.54352	6.20238	6.0634	6.28403	6.92968	6.0564	6.36987	1.05176	0.072804	0.0693082	0.0603086
sp|Q15382|RHEB_HUMAN	RHEB	RHEB_HUMAN GTP-binding protein Rheb	16	6.18071	5.93137	6.36607	5.92085	6.59167	6.11771	6.59531	6.35715	6.09975	6.41546	1.05176	0.0728026	0.0351408	0.035482
sp|Q14202|ZMYM3_HUMAN	ZMYM3	ZMYM3_HUMAN Zinc finger MYM-type protein 3	7	6.23428	6.15855	5.96082	6.48404	6.51391	6.5065	6.5763	6.52509	6.20942	6.53045	1.0517	0.0727233	0.0348424	0.00482467
sp|Q93034|CUL5_HUMAN	CUL5	CUL5_HUMAN Cullin-5	26	5.71634	5.91479	6.43549	6.41134	6.27451	6.0265	6.78838	6.65362	6.11949	6.43575	1.05168	0.0726974	0.0588787	0.0542206
sp|O75061-2|AUXI_HUMAN	DNAJC6	AUXI_HUMAN Isoform 2 of Putative tyrosine-protein phosphatase auxilin	3	5.55668	6.51483	5.58729	6.25686	6.08291	5.68505	5.788	7.59478	5.97891	6.28768	1.05164	0.0726452	0.0805668	0.141158
sp|Q9UBI1|COMD3_HUMAN	COMMD3	COMD3_HUMAN COMM domain-containing protein 3	10	6.09204	6.21869	6.47995	6.71478	6.72618	6.61426	7.10259	6.37876	6.37636	6.70545	1.05161	0.0725994	0.0435142	0.0450034
sp|O76031|CLPX_HUMAN	CLPX	CLPX_HUMAN ATP-dependent Clp protease ATP-binding subunit clpX-like, mitochondrial	28	5.87851	5.73782	6.3423	6.33256	6.19589	6.35222	6.651	6.34555	6.0728	6.38617	1.0516	0.0725886	0.0512034	0.0298675
sp|Q99961|SH3G1_HUMAN	SH3GL1	SH3G1_HUMAN Endophilin-A2	22	5.7837	5.78367	5.97048	6.3847	5.80403	5.93744	6.61915	6.79561	5.98064	6.28906	1.05157	0.0725446	0.0473866	0.0781369
sp|Q9Y217|MTMR6_HUMAN	MTMR6	MTMR6_HUMAN Myotubularin-related protein 6	13	5.48255	5.74747	6.49943	6.69643	5.84251	6.30762	6.70305	6.83187	6.10647	6.42126	1.05155	0.0725183	0.0955175	0.0694057
sp|P51003|PAPOA_HUMAN	PAPOLA	PAPOA_HUMAN Poly(A) polymerase alpha	41	5.97995	5.75317	6.28914	6.24527	6.21632	6.13806	6.48469	6.67775	6.06688	6.3792	1.05148	0.0724213	0.0411736	0.0389212
sp|Q8WWX9|SELM_HUMAN	SELM	SELM_HUMAN Selenoprotein M	3	5.32382	6.57477	6.7876	6.12818	6.63749	6.83402	6.49601	6.12308	6.20359	6.52265	1.05143	0.0723543	0.104406	0.0460366
sp|Q12968|NFAC3_HUMAN	NFATC3	NFAC3_HUMAN Nuclear factor of activated T-cells, cytoplasmic 3	2	6.75422	5.78723	6.33824	6.368	6.29981	6.65402	6.80855	6.78307	6.31192	6.63636	1.0514	0.0723132	0.0630257	0.0353121
sp|Q96CW1|AP2M1_HUMAN	AP2M1	AP2M1_HUMAN AP-2 complex subunit mu	31	6.12302	5.84741	6.04966	6.42457	6.23572	6.4306	6.51385	6.52095	6.11116	6.42528	1.0514	0.0723119	0.0391486	0.0206784
sp|Q14156|EFR3A_HUMAN	EFR3A	EFR3A_HUMAN Protein EFR3 homolog A	1	5.44243	6.41872	7.25078	4.98403	5.58853	6.93912	4.78253	8.02428	6.02399	6.33361	1.0514	0.0723098	0.168217	0.226721
sp|O95900|TRUB2_HUMAN	TRUB2	TRUB2_HUMAN Probable tRNA pseudouridine synthase 2	6	5.83653	5.75008	6.61792	6.778	6.08113	6.35481	6.90297	6.92744	6.24563	6.56659	1.05139	0.0722961	0.0844682	0.0636382
sp|Q969R2|OSBP2_HUMAN	OSBP2	OSBP2_HUMAN Oxysterol-binding protein 2	11	5.77914	5.94786	6.30211	6.61999	6.27614	6.05661	6.61184	6.97003	6.16227	6.47866	1.05134	0.0722313	0.0608504	0.0616332
sp|Q969T7|5NT3B_HUMAN	NT5C3B	5NT3B_HUMAN 7-methylguanosine phosphate-specific 5'-nucleotidase	3	5.61891	5.15969	6.32881	6.84544	5.41008	5.96324	6.85234	6.95551	5.98821	6.29529	1.05128	0.072148	0.124732	0.11745
sp|Q13217|DNJC3_HUMAN	DNAJC3	DNJC3_HUMAN DnaJ homolog subfamily C member 3	26	6.00162	5.9968	6.19606	6.51264	6.42734	6.37265	6.43276	6.74099	6.17678	6.49344	1.05127	0.0721269	0.0392409	0.0257575
sp|Q9NX46|ARHL2_HUMAN	ADPRHL2	ARHL2_HUMAN Poly(ADP-ribose) glycohydrolase ARH3	8	5.85256	5.80918	6.23147	6.49138	6.15343	6.44277	6.68737	6.35002	6.09615	6.4084	1.05122	0.0720658	0.0532561	0.0345918
sp|Q9NXG6-3|P4HTM_HUMAN	P4HTM	P4HTM_HUMAN Isoform 3 of Transmembrane prolyl 4-hydroxylase	4	5.88696	5.99343	6.45995	6.44099	5.94369	6.61017	6.70154	6.79371	6.19533	6.51228	1.05116	0.0719805	0.0480841	0.059333
sp|Q6PD62|CTR9_HUMAN	CTR9	CTR9_HUMAN RNA polymerase-associated protein CTR9 homolog	28	6.01041	5.9109	6.15785	6.42791	6.46041	6.32043	6.43799	6.54126	6.12677	6.44002	1.05113	0.0719396	0.0367139	0.0141668
sp|Q9BTC8|MTA3_HUMAN	MTA3	MTA3_HUMAN Metastasis-associated protein MTA3	9	6.03343	5.64505	6.10787	6.6188	6.19379	6.01021	6.86971	6.57887	6.10129	6.41315	1.05111	0.0719183	0.0656022	0.0601486
sp|Q9Y6K0|CEPT1_HUMAN	CEPT1	CEPT1_HUMAN Choline/ethanolaminephosphotransferase 1	2	5.98868	5.91037	6.87278	6.48232	6.61777	6.36597	6.90828	6.65284	6.31354	6.63622	1.05111	0.071912	0.0713819	0.033432
tr|K7EL68|K7EL68_HUMAN	CDC37	K7EL68_HUMAN Hsp90 co-chaperone Cdc37 (Fragment)	1	6.45543	6.69099	5.63892	7.06549	6.68953	7.96978	6.14489	6.3678	6.46271	6.793	1.05111	0.0719102	0.0934461	0.120087
sp|Q4U2R6|RM51_HUMAN	MRPL51	RM51_HUMAN 39S ribosomal protein L51, mitochondrial	8	5.89053	5.87784	6.51675	6.42623	6.67286	6.16568	6.4925	6.6427	6.17784	6.49343	1.05109	0.0718799	0.055218	0.0357754
sp|Q96IZ7|RSRC1_HUMAN	RSRC1	RSRC1_HUMAN Serine/Arginine-related protein 53	4	6.12746	5.85025	6.42993	6.43383	6.51155	6.79097	6.38007	6.42747	6.21037	6.52751	1.05107	0.0718552	0.0450381	0.0281668
sp|Q14197|ICT1_HUMAN	ICT1	ICT1_HUMAN Peptidyl-tRNA hydrolase ICT1, mitochondrial	12	6.01019	6.15657	6.02565	6.27471	6.62967	6.19429	6.52833	6.36423	6.11678	6.42913	1.05106	0.0718511	0.020286	0.0297052
sp|P17987|TCPA_HUMAN	TCP1	TCPA_HUMAN T-complex protein 1 subunit alpha	136	5.99606	5.94251	6.03693	6.09736	6.19843	6.0453	6.59971	6.45803	6.01821	6.32537	1.05104	0.0718137	0.010869	0.0395143
sp|Q14103-3|HNRPD_HUMAN	HNRNPD	HNRPD_HUMAN Isoform 3 of Heterogeneous nuclear ribonucleoprotein D0	30	6.13495	6.07069	6.0105	6.07508	6.32306	6.46831	5.99178	6.74748	6.0728	6.38266	1.05102	0.0717942	0.00837145	0.0492773
sp|Q9Y276|BCS1_HUMAN	BCS1L	BCS1_HUMAN Mitochondrial chaperone BCS1	7	5.6726	5.78268	6.65039	6.68221	6.00688	6.1912	7.11865	6.73584	6.19697	6.51314	1.05102	0.0717908	0.0877769	0.0780963
sp|Q9Y232|CDYL1_HUMAN	CDYL	CDYL1_HUMAN Chromodomain Y-like protein	10	5.99745	5.90842	6.03641	6.26518	6.36981	6.82075	6.4207	5.83115	6.05187	6.3606	1.05102	0.0717836	0.0251104	0.0639107
sp|Q13136|LIPA1_HUMAN	PPFIA1	LIPA1_HUMAN Liprin-alpha-1	28	5.89609	5.86603	6.44123	6.38608	6.53863	6.28997	6.53404	6.48032	6.14736	6.46074	1.05098	0.071733	0.0501941	0.0180914
sp|O14974|MYPT1_HUMAN	PPP1R12A	MYPT1_HUMAN Protein phosphatase 1 regulatory subunit 12A	32	5.96477	6.06049	6.17885	6.36864	6.36298	6.48376	6.40495	6.57271	6.14319	6.4561	1.05094	0.0716755	0.0283154	0.0143225
sp|Q8TAA5|GRPE2_HUMAN	GRPEL2	GRPE2_HUMAN GrpE protein homolog 2, mitochondrial	7	5.8432	5.79915	6.36261	6.29314	6.20649	6.1224	6.45338	6.75332	6.07453	6.3839	1.05093	0.0716659	0.0484753	0.0444121
sp|Q14498|RBM39_HUMAN	RBM39	RBM39_HUMAN RNA-binding protein 39	14	6.2978	6.14313	6.08439	6.26195	6.81412	6.60716	6.47774	6.14959	6.19682	6.51215	1.05089	0.071607	0.0161271	0.0427809
sp|Q6P444|MTFR2_HUMAN	MTFR2	MTFR2_HUMAN Mitochondrial fission regulator 2	3	5.9765	5.68004	6.93418	6.3301	6.76183	5.85834	7.02818	6.54053	6.2302	6.54722	1.05088	0.0716028	0.0865658	0.076469
sp|Q7Z4G4|TRM11_HUMAN	TRMT11	TRM11_HUMAN tRNA (guanine(10)-N2)-methyltransferase homolog	5	5.53727	6.13689	6.4711	6.63283	6.31843	5.85908	6.547	7.31388	6.19452	6.5096	1.05086	0.0715753	0.0781971	0.0933582
sp|Q9UHX1-2|PUF60_HUMAN	PUF60	PUF60_HUMAN Isoform 2 of Poly(U)-binding-splicing factor PUF60	47	6.15874	6.18112	6.06495	6.11538	6.46	6.47513	6.45514	6.37705	6.13005	6.44183	1.05086	0.0715723	0.008363	0.00683309
sp|Q9H1I8|ASCC2_HUMAN	ASCC2	ASCC2_HUMAN Activating signal cointegrator 1 complex subunit 2	10	5.94295	5.84048	6.08528	6.3632	6.11236	6.50934	6.5429	6.29917	6.05798	6.36594	1.05084	0.0715379	0.0374538	0.0315008
sp|P13807|GYS1_HUMAN	GYS1	GYS1_HUMAN Glycogen [starch] synthase, muscle	24	5.90934	5.97505	6.25921	6.32819	6.36515	6.36282	6.42445	6.56152	6.11795	6.42849	1.05076	0.0714311	0.0337752	0.0144922
sp|Q6PIW4|FIGL1_HUMAN	FIGNL1	FIGL1_HUMAN Fidgetin-like protein 1	10	5.80949	5.52451	6.54399	6.53629	6.35407	6.14083	6.60524	6.55225	6.10357	6.4131	1.05071	0.071368	0.0847649	0.0329424
sp|O75943|RAD17_HUMAN	RAD17	RAD17_HUMAN Cell cycle checkpoint protein RAD17	5	5.67706	5.76534	6.36856	6.3494	6.28211	6.03534	6.5326	6.53443	6.04009	6.34612	1.05067	0.0713048	0.0612681	0.0376118
sp|O43598|DNPH1_HUMAN	DNPH1	DNPH1_HUMAN 2'-deoxynucleoside 5'-phosphate N-hydrolase 1	10	5.91879	5.97728	6.30956	6.11545	6.19113	6.41287	6.45511	6.49393	6.08027	6.38826	1.05065	0.0712876	0.0285645	0.0212147
sp|Q53HC9|TSSC1_HUMAN	TSSC1	TSSC1_HUMAN Protein TSSC1	8	5.77975	5.99453	6.41184	6.37066	6.18998	6.55349	6.24688	6.80944	6.1392	6.44995	1.05062	0.0712379	0.0495886	0.0446464
sp|Q11201|SIA4A_HUMAN	ST3GAL1	SIA4A_HUMAN CMP-N-acetylneuraminate-beta-galactosamide-alpha-2,3-sialyltransferase 1	2	6.5611	5.20837	6.24463	6.17338	5.49959	6.79121	6.21161	6.90796	6.04687	6.35259	1.05056	0.0711569	0.0965534	0.101543
sp|Q8IVL6|P3H3_HUMAN	LEPREL2	P3H3_HUMAN Prolyl 3-hydroxylase 3	4	5.94514	5.9106	6.92525	6.4668	6.43601	6.33052	6.99998	6.75752	6.31195	6.63101	1.05055	0.0711429	0.076296	0.0461103
sp|Q15397|K0020_HUMAN	KIAA0020	K0020_HUMAN Pumilio domain-containing protein KIAA0020	8	6.20417	6.24557	6.81913	6.01293	6.68776	6.65481	6.55707	6.66011	6.32045	6.63994	1.05055	0.0711424	0.0549886	0.00859988
sp|Q6ZS11|RINL_HUMAN	RINL	RINL_HUMAN Ras and Rab interactor-like protein	5	6.08082	6.28117	6.1072	6.44712	6.0249	6.19892	7.04885	6.90297	6.22908	6.54391	1.05054	0.0711344	0.0273528	0.0775334
sp|P11766|ADHX_HUMAN	ADH5	ADHX_HUMAN Alcohol dehydrogenase class-3	34	6.01735	6.0135	5.93455	6.16604	6.2167	6.29861	6.50073	6.3349	6.03286	6.33774	1.05054	0.0711252	0.0160187	0.0188366
sp|Q9NQT8|KI13B_HUMAN	KIF13B	KI13B_HUMAN Kinesin-like protein KIF13B	14	5.75469	6.00989	6.26204	6.78397	6.30147	6.55053	6.55589	6.65642	6.20265	6.51608	1.05053	0.0711196	0.0708449	0.023194
sp|P04350|TBB4A_HUMAN	TUBB4A	TBB4A_HUMAN Tubulin beta-4A chain	4	5.41138	6.3725	7.06016	6.27828	6.35263	6.16327	6.92123	6.95456	6.28058	6.59792	1.05053	0.071114	0.107664	0.0606762
sp|Q13557-12|KCC2D_HUMAN	CAMK2D	KCC2D_HUMAN Isoform Delta 12 of Calcium/calmodulin-dependent protein kinase type II subunit delta	21	5.84492	5.92652	6.08823	6.08042	6.25648	6.20071	6.42463	6.26781	5.98502	6.28741	1.05052	0.0711086	0.0199579	0.0152794
sp|Q5TKA1-2|LIN9_HUMAN	LIN9	LIN9_HUMAN Isoform 2 of Protein lin-9 homolog	6	5.64746	5.73469	6.53959	6.41728	6.08473	6.45626	6.41549	6.61213	6.08475	6.39215	1.05052	0.0711027	0.0753853	0.034695
sp|Q96KP1|EXOC2_HUMAN	EXOC2	EXOC2_HUMAN Exocyst complex component 2	11	5.70964	5.6187	6.38502	6.51794	5.88383	6.6558	7.1058	5.80955	6.05783	6.36374	1.0505	0.0710761	0.0758167	0.0982762
sp|P08581-2|MET_HUMAN	MET	MET_HUMAN Isoform 2 of Hepatocyte growth factor receptor	27	5.94369	6.03556	6.17827	6.25099	6.3302	6.2362	6.42817	6.64616	6.10213	6.41018	1.05048	0.0710531	0.0226861	0.0274191
sp|Q6UB28|MAP12_HUMAN	METAP1D	MAP12_HUMAN Methionine aminopeptidase 1D, mitochondrial	4	5.89648	6.05737	6.34047	5.82012	6.56606	5.86847	6.45756	6.43903	6.02861	6.33278	1.05045	0.0710136	0.0381887	0.0496733
sp|P11177|ODPB_HUMAN	PDHB	ODPB_HUMAN Pyruvate dehydrogenase E1 component subunit beta, mitochondrial	22	5.96383	5.87108	6.14446	6.21514	6.25803	6.23731	6.57173	6.34809	6.04863	6.35379	1.05045	0.0710096	0.026249	0.0240871
sp|Q15014|MO4L2_HUMAN	MORF4L2	MO4L2_HUMAN Mortality factor 4-like protein 2	7	5.9875	6.08352	6.23706	6.23493	6.5808	6.27299	6.44546	6.48187	6.13575	6.44528	1.05045	0.0710027	0.0199178	0.0199072
sp|Q9NUW8|TYDP1_HUMAN	TDP1	TYDP1_HUMAN Tyrosyl-DNA phosphodiesterase 1	3	5.72053	6.09843	6.26046	6.63874	5.82553	6.48095	6.253	7.40526	6.17954	6.49118	1.05043	0.0709824	0.0615983	0.102786
sp|Q5HYI8|RABL3_HUMAN	RABL3	RABL3_HUMAN Rab-like protein 3	5	5.81991	5.66142	6.59209	6.55617	6.26599	5.8297	6.67098	7.10483	6.1574	6.46788	1.05042	0.0709711	0.0788894	0.0844474
sp|Q96L91|EP400_HUMAN	EP400	EP400_HUMAN E1A-binding protein p400	9	5.67376	5.34973	6.7399	6.76126	6.38378	6.36285	6.22461	6.7898	6.13116	6.44026	1.05041	0.0709583	0.118644	0.0378078
sp|Q9HCC9|LST2_HUMAN	ZFYVE28	LST2_HUMAN Lateral signaling target protein 2 homolog	1	6.42564	5.76312	6.44559	5.93633	5.93552	5.80429	7.58547	6.48397	6.14267	6.45231	1.05041	0.0709504	0.0562739	0.125656
sp|Q02750|MP2K1_HUMAN	MAP2K1	MP2K1_HUMAN Dual specificity mitogen-activated protein kinase kinase 1	6	5.96114	5.69068	6.35272	6.36514	6.03988	6.13433	6.6819	6.74159	6.09242	6.39943	1.05039	0.0709269	0.0536711	0.0568034
sp|Q9UKD2|MRT4_HUMAN	MRTO4	MRT4_HUMAN mRNA turnover protein 4 homolog	10	6.19973	5.99475	6.05575	5.95634	6.53393	6.47491	6.20627	6.21038	6.05164	6.35637	1.05035	0.0708769	0.0176603	0.0271615
sp|P53778|MK12_HUMAN	MAPK12	MK12_HUMAN Mitogen-activated protein kinase 12	3	5.3002	4.92696	5.02165	6.09607	5.49839	5.06108	5.682	6.17809	5.33622	5.60489	1.05035	0.0708679	0.0994636	0.082508
sp|O00203|AP3B1_HUMAN	AP3B1	AP3B1_HUMAN AP-3 complex subunit beta-1	41	5.88638	5.79575	6.31393	6.3468	6.41817	6.32572	6.58521	6.23906	6.08572	6.39204	1.05034	0.0708497	0.0468681	0.0231691
sp|Q12849|GRSF1_HUMAN	GRSF1	GRSF1_HUMAN G-rich sequence factor 1	28	5.99804	6.00221	5.9973	6.23917	6.13074	6.33033	6.57105	6.4226	6.05918	6.36368	1.05025	0.0707387	0.0198068	0.0289538
sp|Q5T8A7|PPR26_HUMAN	PPP1R26	PPR26_HUMAN Protein phosphatase 1 regulatory subunit 26	2	6.54316	6.7882	5.81429	5.87959	6.73103	7.53265	6.73077	5.28678	6.25631	6.57031	1.05019	0.0706489	0.0773466	0.142373
sp|Q96RU3|FNBP1_HUMAN	FNBP1	FNBP1_HUMAN Formin-binding protein 1	10	6.01315	5.7824	6.01309	6.56688	6.20105	6.10087	6.72751	6.56757	6.09388	6.39925	1.05011	0.0705417	0.0547374	0.0463918
sp|Q2TAA2|IAH1_HUMAN	IAH1	IAH1_HUMAN Isoamyl acetate-hydrolyzing esterase 1 homolog	6	5.97041	6.32191	5.85639	6.00838	6.27029	6.43301	6.04421	6.61872	6.03927	6.34156	1.05005	0.0704624	0.0329819	0.0384838
sp|Q8N4A0|GALT4_HUMAN	GALNT4	GALT4_HUMAN Polypeptide N-acetylgalactosaminyltransferase 4	4	6.04095	5.7896	6.89478	6.35246	6.10788	5.92275	7.42583	6.87651	6.26945	6.58324	1.05005	0.07046	0.0759611	0.105902
sp|O43301|HS12A_HUMAN	HSPA12A	HS12A_HUMAN Heat shock 70 kDa protein 12A	13	6.01169	5.98875	6.31953	6.22512	6.27928	6.56021	6.62689	6.30712	6.13627	6.44338	1.05005	0.070454	0.0264052	0.0272991
sp|Q9BU23|LMF2_HUMAN	LMF2	LMF2_HUMAN Lipase maturation factor 2	2	5.7099	6.31675	6.65789	6.15238	6.23779	6.09356	7.38712	6.36059	6.20923	6.51976	1.05001	0.0704056	0.0634342	0.0902555
sp|P13804|ETFA_HUMAN	ETFA	ETFA_HUMAN Electron transfer flavoprotein subunit alpha, mitochondrial	25	6.00875	6.01174	6.23556	6.29646	6.49648	6.13615	6.58362	6.5633	6.13813	6.44489	1.04998	0.0703566	0.0243966	0.0324543
sp|Q9C0B7|TNG6_HUMAN	TANGO6	TNG6_HUMAN Transport and Golgi organization protein 6 homolog	8	5.65349	5.61311	6.69583	6.66296	6.00054	6.3842	6.87156	6.59958	6.15635	6.46397	1.04997	0.0703458	0.0981649	0.0568874
sp|Q9UNM6|PSD13_HUMAN	PSMD13	PSD13_HUMAN 26S proteasome non-ATPase regulatory subunit 13	39	6.14595	5.8506	6.07649	6.21892	6.25202	6.26166	6.49309	6.49883	6.07299	6.3764	1.04996	0.0703351	0.0262238	0.021663
sp|Q9UHD1|CHRD1_HUMAN	CHORDC1	CHRD1_HUMAN Cysteine and histidine-rich domain-containing protein 1	33	6.23021	6.05001	5.9411	6.20251	6.25346	6.45537	6.37689	6.55752	6.10596	6.41081	1.04993	0.0702891	0.0221891	0.0200204
sp|Q9NZI7|UBIP1_HUMAN	UBP1	UBIP1_HUMAN Upstream-binding protein 1	5	5.71834	5.65543	6.54494	6.55348	6.39951	6.11142	6.3599	6.82228	6.11805	6.42328	1.04989	0.0702383	0.0814864	0.0459236
sp|Q8IVH8|M4K3_HUMAN	MAP4K3	M4K3_HUMAN Mitogen-activated protein kinase kinase kinase kinase 3	4	6.25657	5.95238	6.29138	6.26584	6.66769	6.44658	6.64228	6.24457	6.19154	6.50028	1.04986	0.070203	0.025861	0.0303109
sp|Q96AX2-3|RAB37_HUMAN	RAB37	RAB37_HUMAN Isoform 3 of Ras-related protein Rab-37	2	6.34179	6.34868	5.89169	5.76332	6.4915	8.14776	5.67812	5.24058	6.08637	6.38949	1.0498	0.0701187	0.0498629	0.200589
sp|Q96LD8|SENP8_HUMAN	SENP8	SENP8_HUMAN Sentrin-specific protease 8	2	4.98272	6.27361	6.26422	6.61154	6.00695	6.42263	6.32189	6.58239	6.03302	6.33346	1.0498	0.070114	0.119111	0.0383149
sp|Q14657|LAGE3_HUMAN	LAGE3	LAGE3_HUMAN EKC/KEOPS complex subunit LAGE3	3	6.2688	5.66797	6.27307	6.43994	6.01435	5.59469	6.51225	7.75576	6.16244	6.46926	1.04979	0.0700984	0.0550342	0.144697
sp|Q10567-3|AP1B1_HUMAN	AP1B1	AP1B1_HUMAN Isoform C of AP-1 complex subunit beta-1	41	5.87471	6.08194	6.03851	6.34395	6.33444	6.62569	6.34309	6.24745	6.08478	6.38767	1.04978	0.0700847	0.0319589	0.0257456
sp|Q9UJ14|GGT7_HUMAN	GGT7	GGT7_HUMAN Gamma-glutamyltransferase 7	2	6.25643	5.06995	5.4469	6.44605	6.17611	7.28917	5.71887	5.19054	5.80483	6.09367	1.04976	0.0700575	0.11267	0.146539
sp|Q9P265|DIP2B_HUMAN	DIP2B	DIP2B_HUMAN Disco-interacting protein 2 homolog B	36	5.89234	6.18921	6.05021	6.34007	6.45267	6.34296	6.40471	6.48859	6.11796	6.42223	1.04973	0.0700248	0.0312852	0.00981541
sp|O60346|PHLP1_HUMAN	PHLPP1	PHLP1_HUMAN PH domain leucine-rich repeat-containing protein phosphatase 1	3	6.21799	5.82283	5.97448	6.56798	6.39665	5.88249	6.77087	6.75401	6.14582	6.45101	1.04966	0.0699184	0.0529009	0.0645557
sp|Q9NVX0|HAUS2_HUMAN	HAUS2	HAUS2_HUMAN HAUS augmin-like complex subunit 2	5	5.90085	6.15302	5.92059	5.91272	5.93301	6.43542	6.26509	6.43865	5.9718	6.26804	1.04961	0.0698503	0.0202768	0.0379084
sp|Q9H9L7|AKIR1_HUMAN	AKIRIN1	AKIR1_HUMAN Akirin-1	2	5.88159	5.89526	6.42174	6.11403	5.98412	6.48658	6.15933	6.88868	6.07815	6.37968	1.04961	0.06985	0.0415593	0.0624065
sp|Q9UPT5|EXOC7_HUMAN	EXOC7	EXOC7_HUMAN Exocyst complex component 7	11	5.67614	5.59981	6.51383	6.49625	5.96351	5.96624	6.74693	6.81338	6.07151	6.37251	1.04958	0.0698081	0.0826188	0.0739872
sp|O43929|ORC4_HUMAN	ORC4	ORC4_HUMAN Origin recognition complex subunit 4	7	5.46277	5.425	6.18747	6.49389	5.99287	6.08417	6.52772	6.13283	5.89228	6.1844	1.04958	0.0698065	0.0904379	0.0381799
sp|P62380|TBPL1_HUMAN	TBPL1	TBPL1_HUMAN TATA box-binding protein-like protein 1	6	6.11159	5.8778	6.26637	6.01038	6.29765	6.5242	6.37625	6.27071	6.06654	6.3672	1.04956	0.0697869	0.027042	0.0178791
sp|O15264|MK13_HUMAN	MAPK13	MK13_HUMAN Mitogen-activated protein kinase 13	11	5.4945	6.09135	6.2749	5.95521	6.02689	5.90956	6.32909	6.73013	5.95399	6.24892	1.04953	0.0697495	0.0559555	0.0586127
sp|O15305|PMM2_HUMAN	PMM2	PMM2_HUMAN Phosphomannomutase 2	14	6.04061	6.12587	5.89262	6.08619	6.34343	6.00148	6.40298	6.59224	6.03632	6.33503	1.04949	0.0696821	0.0168875	0.0388907
sp|Q16576-2|RBBP7_HUMAN	RBBP7	RBBP7_HUMAN Isoform 2 of Histone-binding protein RBBP7	33	6.09489	6.2961	6.04599	6.16701	6.32342	6.30932	6.53406	6.65455	6.151	6.45534	1.04948	0.0696721	0.0176816	0.0260149
tr|K7EMX1|K7EMX1_HUMAN	SPC24	K7EMX1_HUMAN Kinetochore protein Spc24 (Fragment)	7	5.48223	5.76231	6.53287	6.5383	6.08908	5.94681	7.06955	6.41263	6.07893	6.37952	1.04945	0.0696305	0.0887594	0.0783147
sp|Q7KZN9|COX15_HUMAN	COX15	COX15_HUMAN Cytochrome c oxidase assembly protein COX15 homolog	7	5.60681	5.71148	6.50009	6.17041	6.25642	6.24263	6.3908	6.2842	5.9972	6.29351	1.04941	0.0695769	0.0692168	0.0106654
sp|O76074|PDE5A_HUMAN	PDE5A	PDE5A_HUMAN cGMP-specific 3',5'-cyclic phosphodiesterase	4	5.85569	6.74145	6.39785	5.98713	6.34982	6.76566	6.61915	6.48158	6.24553	6.55405	1.0494	0.0695632	0.0645696	0.0272908
sp|O60231|DHX16_HUMAN	DHX16	DHX16_HUMAN Putative pre-mRNA-splicing factor ATP-dependent RNA helicase DHX16	26	6.22104	6.25615	6.23203	6.22687	6.44435	6.76391	6.49138	6.46766	6.23402	6.54182	1.04937	0.0695298	0.00247347	0.0228218
sp|Q4LDG9|DNAL1_HUMAN	DNAL1	DNAL1_HUMAN Dynein light chain 1, axonemal	3	6.02734	6.00474	6.32897	6.50701	6.58972	5.9129	6.49739	7.09486	6.21701	6.52372	1.04933	0.0694722	0.0391438	0.0742744
sp|Q96DI7|SNR40_HUMAN	SNRNP40	SNR40_HUMAN U5 small nuclear ribonucleoprotein 40 kDa protein	11	5.90845	6.01779	6.088	6.09566	6.59025	6.37549	6.1304	6.20295	6.02747	6.32477	1.04932	0.0694598	0.0143913	0.0323604
sp|P07947|YES_HUMAN	YES1	YES_HUMAN Tyrosine-protein kinase Yes	15	5.74128	5.78031	6.08589	6.52964	6.0436	6.14887	6.54997	6.58504	6.03428	6.33187	1.04932	0.06945	0.0603908	0.0435626
sp|Q9UIJ7|KAD3_HUMAN	AK3	KAD3_HUMAN GTP:AMP phosphotransferase AK3, mitochondrial	28	6.13269	6.0878	5.77436	6.04358	6.303	6.35508	6.00006	6.56548	6.00961	6.30591	1.0493	0.0694327	0.0267897	0.0370039
sp|Q70HW3|SAMC_HUMAN	SLC25A26	SAMC_HUMAN S-adenosylmethionine mitochondrial carrier protein	1	6.05019	6.32384	6.39228	7.00114	6.2334	7.02002	6.3895	7.39463	6.44186	6.75939	1.04929	0.0694147	0.0622609	0.0803507
sp|P54278|PMS2_HUMAN	PMS2	PMS2_HUMAN Mismatch repair endonuclease PMS2	2	6.28914	6.43006	6.64632	5.65247	6.40261	6.00114	6.12978	7.71746	6.2545	6.56275	1.04928	0.0694059	0.0683331	0.120041
sp|Q6IAA8|LTOR1_HUMAN	LAMTOR1	LTOR1_HUMAN Ragulator complex protein LAMTOR1	13	5.90689	5.97966	5.98396	6.41596	6.70766	6.7907	5.89094	6.09387	6.07162	6.37079	1.04927	0.0693919	0.0382549	0.0700069
sp|Q9UHD2|TBK1_HUMAN	TBK1	TBK1_HUMAN Serine/threonine-protein kinase TBK1	23	5.99927	5.98744	6.24948	6.381	6.37471	6.26981	6.4523	6.73255	6.1543	6.45734	1.04924	0.0693464	0.0314417	0.0306822
sp|O60493|SNX3_HUMAN	SNX3	SNX3_HUMAN Sorting nexin-3	8	5.98787	5.87753	6.30051	6.31398	6.37678	5.98514	6.45983	6.86279	6.11997	6.42114	1.04921	0.0693032	0.0361038	0.0560515
sp|Q9Y6W3|CAN7_HUMAN	CAPN7	CAN7_HUMAN Calpain-7	7	5.63729	6.10334	6.5093	6.37173	6.20765	6.51963	6.69796	6.40722	6.15541	6.45812	1.04918	0.069257	0.0624422	0.0318131
sp|Q9NPF5|DMAP1_HUMAN	DMAP1	DMAP1_HUMAN DNA methyltransferase 1-associated protein 1	9	5.86148	5.80483	6.32902	6.33371	6.271	6.21974	6.29189	6.74282	6.08226	6.38136	1.04918	0.069257	0.0474456	0.0380594
sp|P09874|PARP1_HUMAN	PARP1	PARP1_HUMAN Poly [ADP-ribose] polymerase 1	86	6.22874	5.91253	6.18931	6.16734	6.51883	6.37709	6.37878	6.42684	6.12448	6.42539	1.04913	0.0691955	0.0234412	0.0103386
sp|Q66K74|MAP1S_HUMAN	MAP1S	MAP1S_HUMAN Microtubule-associated protein 1S	17	5.95781	5.64523	5.98164	6.10541	5.83705	6.23729	6.81755	5.96137	5.92252	6.21331	1.0491	0.0691514	0.0330697	0.0701988
sp|Q8TDW0|LRC8C_HUMAN	LRRC8C	LRC8C_HUMAN Leucine-rich repeat-containing protein 8C	7	6.14484	6.2691	6.23706	6.34652	6.46587	6.55298	6.58291	6.62303	6.24938	6.5562	1.0491	0.0691462	0.0133577	0.0101747
sp|Q6PI26|SHQ1_HUMAN	SHQ1	SHQ1_HUMAN Protein SHQ1 homolog	3	5.86624	6.38587	6.26502	6.26311	6.2961	6.90531	6.30007	6.49386	6.19506	6.49883	1.04904	0.0690629	0.0365791	0.0440498
sp|Q9UGU5|HMGX4_HUMAN	HMGXB4	HMGX4_HUMAN HMG domain-containing protein 4	1	6.1799	6.24283	6.62943	6.37726	5.96417	6.51618	7.27385	6.92141	6.35736	6.6689	1.04901	0.0690227	0.0313319	0.0843678
sp|Q9NZ43|USE1_HUMAN	USE1	USE1_HUMAN Vesicle transport protein USE1	3	6.35927	5.997	6.054	6.42903	6.30671	6.85454	6.18918	6.70604	6.20983	6.51412	1.049	0.0690171	0.0347827	0.048652
sp|P28328|PEX2_HUMAN	PEX2	PEX2_HUMAN Peroxisome biogenesis factor 2	1	6.0091	5.94663	6.3966	7.18213	6.54726	6.38523	6.30203	7.55052	6.38361	6.69626	1.04898	0.0689819	0.0890302	0.0863972
sp|P62310|LSM3_HUMAN	LSM3	LSM3_HUMAN U6 snRNA-associated Sm-like protein LSm3	4	6.31537	6.84331	5.69994	5.81216	6.09958	6.3473	6.23661	7.19529	6.1677	6.46969	1.04896	0.0689663	0.0849452	0.0763912
sp|Q9H9J2|RM44_HUMAN	MRPL44	RM44_HUMAN 39S ribosomal protein L44, mitochondrial	16	6.10321	6.07021	6.19796	6.5254	6.39407	6.46707	6.6505	6.60401	6.2242	6.52891	1.04896	0.0689554	0.033414	0.0182153
sp|Q9UNF0|PACN2_HUMAN	PACSIN2	PACN2_HUMAN Protein kinase C and casein kinase substrate in neurons protein 2	31	5.79741	6.08908	6.04226	6.23827	6.16509	6.26377	6.27394	6.64551	6.04176	6.33708	1.04888	0.06885	0.0303036	0.0333593
sp|O15530|PDPK1_HUMAN	PDPK1	PDPK1_HUMAN 3-phosphoinositide-dependent protein kinase 1	8	5.66297	5.61572	6.71065	6.35177	6.31518	5.98618	6.51459	6.71491	6.08528	6.38272	1.04888	0.0688472	0.0880328	0.0486735
sp|P61011|SRP54_HUMAN	SRP54	SRP54_HUMAN Signal recognition particle 54 kDa protein	32	5.81372	5.8985	6.24029	6.38203	6.23185	6.20446	6.62403	6.46316	6.08364	6.38087	1.04886	0.0688207	0.0445848	0.0312424
sp|Q9H8T0-2|AKTIP_HUMAN	AKTIP	AKTIP_HUMAN Isoform 2 of AKT-interacting protein	3	5.49573	5.55557	6.07308	6.7181	6.03469	6.20719	6.75427	6.01099	5.96062	6.25178	1.04885	0.0688058	0.09523	0.0553784
sp|Q86W42|THOC6_HUMAN	THOC6	THOC6_HUMAN THO complex subunit 6 homolog	7	6.0537	5.82967	6.55032	6.22772	6.51641	6.5724	6.33689	6.44012	6.16535	6.46645	1.04884	0.0687916	0.049307	0.0157708
sp|A2RU67|K1467_HUMAN	KIAA1467	K1467_HUMAN Uncharacterized protein KIAA1467	4	5.98584	6.37785	5.81187	6.15591	6.28802	6.44967	6.57397	6.20809	6.08287	6.37994	1.04884	0.0687907	0.0397286	0.0256743
sp|Q7Z4Q2|HEAT3_HUMAN	HEATR3	HEAT3_HUMAN HEAT repeat-containing protein 3	8	5.76011	5.83747	6.35087	6.4161	6.1018	6.54795	6.69223	6.20865	6.09114	6.38766	1.04868	0.0685753	0.0558339	0.0435556
sp|O00469-2|PLOD2_HUMAN	PLOD2	PLOD2_HUMAN Isoform 2 of Procollagen-lysine,2-oxoglutarate 5-dioxygenase 2	11	5.85378	5.46352	6.55738	6.33266	6.17756	6.31537	6.57707	6.3154	6.05183	6.34635	1.04867	0.0685544	0.0809379	0.02631
sp|Q9P2R7|SUCB1_HUMAN	SUCLA2	SUCB1_HUMAN Succinyl-CoA ligase [ADP-forming] subunit beta, mitochondrial	36	5.61164	5.92808	6.2077	6.4052	6.19906	6.14794	6.52286	6.45807	6.03815	6.33198	1.04866	0.0685495	0.0571706	0.0293866
sp|O43379-4|WDR62_HUMAN	WDR62	WDR62_HUMAN Isoform 4 of WD repeat-containing protein 62	2	5.89907	5.86726	6.6543	6.18277	6.63817	6.40144	6.58801	6.17296	6.15085	6.45015	1.04866	0.0685458	0.059239	0.0327125
sp|Q13952|NFYC_HUMAN	NFYC	NFYC_HUMAN Nuclear transcription factor Y subunit gamma	9	6.08211	6.26455	6.3088	6.16498	6.17682	6.79891	6.66207	6.39024	6.20511	6.50701	1.04865	0.068538	0.0163885	0.0427285
sp|Q8NE01|CNNM3_HUMAN	CNNM3	CNNM3_HUMAN Metal transporter CNNM3	7	6.2432	5.97998	7.04904	6.15581	6.10662	5.99092	7.60731	6.96005	6.35701	6.66622	1.04864	0.0685222	0.074589	0.114283
sp|Q9BYT8|NEUL_HUMAN	NLN	NEUL_HUMAN Neurolysin, mitochondrial	37	6.06285	6.01521	6.16497	6.32758	6.38297	6.07895	6.65165	6.65173	6.14265	6.44132	1.04862	0.0684957	0.0225001	0.0423485
sp|Q96QG7|MTMR9_HUMAN	MTMR9	MTMR9_HUMAN Myotubularin-related protein 9	12	5.83957	5.85597	6.18586	6.58841	6.2091	6.31756	6.48444	6.64837	6.11745	6.41487	1.04862	0.0684885	0.0575682	0.030009
sp|Q96NU7|HUTI_HUMAN	AMDHD1	HUTI_HUMAN Probable imidazolonepropionase	2	5.83592	6.11763	6.71048	6.16511	6.43425	6.07157	6.00024	7.52972	6.20729	6.50894	1.0486	0.0684613	0.0588944	0.108551
sp|Q9UPU9|SMAG1_HUMAN	SAMD4A	SMAG1_HUMAN Protein Smaug homolog 1	1	6.16088	6.32462	6.11398	6.03569	7.03919	6.01521	6.40686	6.37077	6.15879	6.45801	1.04858	0.0684416	0.0198121	0.0659429
sp|P23229|ITA6_HUMAN	ITGA6	ITA6_HUMAN Integrin alpha-6	34	6.1385	6.25091	6.16854	6.13305	6.60581	6.54501	6.3975	6.34045	6.17275	6.47219	1.04851	0.0683412	0.00881183	0.0191512
sp|P50990|TCPQ_HUMAN	CCT8	TCPQ_HUMAN T-complex protein 1 subunit theta	148	5.95952	5.99324	6.0419	6.17909	6.14512	6.18087	6.58039	6.43931	6.04344	6.33642	1.04848	0.0682991	0.0159761	0.0329658
sp|O00418|EF2K_HUMAN	EEF2K	EF2K_HUMAN Eukaryotic elongation factor 2 kinase	9	6.07948	5.8873	6.46708	6.39566	6.51576	6.10226	6.66788	6.74693	6.20738	6.50821	1.04846	0.0682758	0.0437942	0.0441184
sp|Q9BUT9|F195A_HUMAN	FAM195A	F195A_HUMAN Protein FAM195A	1	5.24202	5.49164	7.77708	4.93071	6.43449	6.24475	5.27234	6.62587	5.86036	6.14436	1.04846	0.0682734	0.221531	0.097945
sp|Q9Y227|ENTP4_HUMAN	ENTPD4	ENTP4_HUMAN Ectonucleoside triphosphate diphosphohydrolase 4	4	5.71359	6.0756	5.86316	6.79759	6.26947	6.08124	6.5787	6.70528	6.11248	6.40867	1.04846	0.0682665	0.0785738	0.0444527
sp|Q9UI95|MD2L2_HUMAN	MAD2L2	MD2L2_HUMAN Mitotic spindle assembly checkpoint protein MAD2B	4	5.50347	5.80873	6.50921	6.70862	6.41672	6.33802	6.6093	6.3545	6.13251	6.42963	1.04845	0.0682597	0.0929297	0.0193602
sp|Q92845|KIFA3_HUMAN	KIFAP3	KIFA3_HUMAN Kinesin-associated protein 3	10	5.72894	5.95235	6.55676	6.40544	6.19746	6.22688	6.79539	6.61701	6.16087	6.45919	1.04842	0.0682175	0.0626254	0.045613
sp|Q6L8Q7|PDE12_HUMAN	PDE12	PDE12_HUMAN 2',5'-phosphodiesterase 12	23	5.82371	5.87607	6.17972	6.39821	6.15481	6.14911	6.56254	6.5858	6.06943	6.36307	1.04838	0.0681614	0.0444167	0.0383399
sp|P50225|ST1A1_HUMAN	SULT1A1	ST1A1_HUMAN Sulfotransferase 1A1	6	5.83286	5.88734	6.49485	6.14884	6.08064	6.32279	6.6237	6.5152	6.09097	6.38558	1.04837	0.0681456	0.0496668	0.0373264
sp|Q7RTS9|DYM_HUMAN	DYM	DYM_HUMAN Dymeclin	5	5.84186	5.87079	6.5253	6.57393	6.20079	6.42016	7.04714	6.34341	6.20297	6.50287	1.04835	0.0681185	0.0646363	0.0575214
sp|O75648|MTU1_HUMAN	TRMU	MTU1_HUMAN Mitochondrial tRNA-specific 2-thiouridylase 1	11	5.77528	5.8724	5.97597	6.47558	5.93181	6.16804	6.35886	6.80508	6.02481	6.31595	1.04832	0.068084	0.0517008	0.0585698
sp|Q6NSJ0|K1161_HUMAN	KIAA1161	K1161_HUMAN Uncharacterized family 31 glucosidase KIAA1161	6	6.02811	5.97433	6.44306	6.58308	6.40815	6.32203	6.76284	6.74314	6.25714	6.55904	1.04825	0.0679801	0.0482319	0.0345843
sp|A4D1E9|GTPBA_HUMAN	GTPBP10	GTPBA_HUMAN GTP-binding protein 10	16	6.08168	5.93078	6.26816	6.28234	6.40918	6.29194	6.58	6.46654	6.14074	6.43692	1.04823	0.0679569	0.0272264	0.0186291
sp|Q9Y2Z0-2|SUGT1_HUMAN	SUGT1	SUGT1_HUMAN Isoform 2 of Suppressor of G2 allele of SKP1 homolog	1	6.39249	5.95823	5.34013	6.79597	6.47555	6.62401	6.24283	6.32455	6.1217	6.41674	1.04819	0.0679059	0.101819	0.0262574
sp|Q13492|PICAL_HUMAN	PICALM	PICAL_HUMAN Phosphatidylinositol-binding clathrin assembly protein	10	5.73929	6.0484	6.3873	6.49214	6.23209	6.28525	6.64444	6.69361	6.16678	6.46385	1.04817	0.0678752	0.0554867	0.0369371
sp|P49917|DNLI4_HUMAN	LIG4	DNLI4_HUMAN DNA ligase 4	6	5.9378	5.91431	6.49215	6.36234	6.30359	6.27757	6.45887	6.85652	6.17665	6.47414	1.04816	0.0678634	0.0476522	0.0412707
sp|Q86UA6-8|RIP_HUMAN	RPAIN	RIP_HUMAN Isoform 8 of RPA-interacting protein	3	6.25993	6.42354	5.98081	6.11996	6.37445	6.60826	6.23318	6.76111	6.19606	6.49425	1.04813	0.0678118	0.0306151	0.0363
sp|Q9HA47|UCK1_HUMAN	UCK1	UCK1_HUMAN Uridine-cytidine kinase 1	4	5.67273	5.92362	6.33395	6.73323	6.03339	6.03381	6.79998	6.98238	6.16588	6.46239	1.04809	0.0677604	0.0756092	0.0774779
sp|Q6PJG2|EMSA1_HUMAN	ELMSAN1	EMSA1_HUMAN ELM2 and SANT domain-containing protein 1	3	6.11315	6.38651	6.61276	5.84669	6.48424	6.1424	6.93573	6.59676	6.23978	6.53978	1.04808	0.0677481	0.0532494	0.0500197
sp|Q14161|GIT2_HUMAN	GIT2	GIT2_HUMAN ARF GTPase-activating protein GIT2	9	5.80868	5.83879	6.27758	6.57087	6.38748	6.28985	6.346	6.64951	6.12398	6.41821	1.04805	0.0677014	0.0599272	0.0248208
sp|P53609|PGTB1_HUMAN	PGGT1B	PGTB1_HUMAN Geranylgeranyl transferase type-1 subunit beta	9	6.2134	6.10718	6.21354	5.98624	6.36825	6.19964	6.59546	6.53496	6.13009	6.42458	1.04804	0.0676933	0.0176507	0.0277211
sp|Q14CB8-2|RHG19_HUMAN	ARHGAP19	RHG19_HUMAN Isoform 2 of Rho GTPase-activating protein 19	2	5.96431	6.29567	5.37362	6.24196	6.42977	6.35292	5.99741	6.24122	5.96889	6.25533	1.04799	0.0676233	0.070797	0.0301454
sp|Q0VDG4|SCRN3_HUMAN	SCRN3	SCRN3_HUMAN Secernin-3	7	6.02977	6.25508	6.1268	6.29976	6.50075	6.69693	6.60716	6.09238	6.17785	6.4743	1.04799	0.0676199	0.019904	0.0412314
sp|Q9H1K0|RBNS5_HUMAN	ZFYVE20	RBNS5_HUMAN Rabenosyn-5	7	6.06982	6.09927	6.40413	6.49548	6.35962	6.30542	6.72509	6.8806	6.26717	6.56768	1.04795	0.0675691	0.0342247	0.0425937
sp|P40189|IL6RB_HUMAN	IL6ST	IL6RB_HUMAN Interleukin-6 receptor subunit beta	2	6.06137	6.48665	6.16453	5.93067	6.30268	7.28359	6.01291	6.22566	6.1608	6.45621	1.04795	0.0675686	0.0385296	0.0875182
sp|Q5T8P6-3|RBM26_HUMAN	RBM26	RBM26_HUMAN Isoform 3 of RNA-binding protein 26	29	6.08263	6.15544	6.32917	6.10751	6.63951	6.47954	6.27309	6.46431	6.16869	6.46411	1.04789	0.0674887	0.0180222	0.0232037
sp|Q8N0W3-2|FUK_HUMAN	FUK	FUK_HUMAN Isoform 2 of L-fucose kinase	2	5.41359	6.61429	5.89439	6.2269	7.29151	6.63388	5.95945	5.42082	6.03729	6.32641	1.04789	0.0674865	0.0843668	0.128438
sp|P35244|RFA3_HUMAN	RPA3	RFA3_HUMAN Replication protein A 14 kDa subunit	10	5.9309	5.85429	5.8015	6.39644	6.21335	6.26304	6.18201	6.47251	5.99578	6.28273	1.04786	0.067443	0.0454214	0.0208263
sp|Q9BVJ7|DUS23_HUMAN	DUSP23	DUS23_HUMAN Dual specificity protein phosphatase 23	10	5.90022	6.29299	5.84674	6.03253	6.62802	6.53977	6.06458	5.99195	6.01812	6.30608	1.04785	0.0674306	0.0330988	0.0514058
sp|P35579|MYH9_HUMAN	MYH9	MYH9_HUMAN Myosin-9	244	6.09009	6.31226	5.86679	6.12903	6.33355	6.58474	6.33163	6.31479	6.09954	6.39118	1.04781	0.0673807	0.0299895	0.0202336
sp|P14735|IDE_HUMAN	IDE	IDE_HUMAN Insulin-degrading enzyme	41	5.82186	5.84299	6.5358	6.56115	6.36315	6.20102	6.81337	6.56757	6.19045	6.48628	1.04779	0.0673465	0.0668176	0.0408026
sp|Q8WWN8|ARAP3_HUMAN	ARAP3	ARAP3_HUMAN Arf-GAP with Rho-GAP domain, ANK repeat and PH domain-containing protein 3	6	5.77964	5.81064	6.47559	6.30949	6.12077	6.05705	6.89312	6.46924	6.09384	6.38504	1.04779	0.0673452	0.0577205	0.0601598
sp|Q7Z3K3|POGZ_HUMAN	POGZ	POGZ_HUMAN Pogo transposable element with ZNF domain	4	5.64179	6.53588	5.96457	6.23072	6.23872	6.29128	6.06887	6.9387	6.09324	6.38439	1.04778	0.0673398	0.0625076	0.0597602
sp|Q9Y547|IFT25_HUMAN	HSPB11	IFT25_HUMAN Intraflagellar transport protein 25 homolog	7	5.58255	6.83442	6.68029	5.96653	6.54504	6.7006	6.50278	6.51238	6.26595	6.5652	1.04776	0.0673063	0.0944848	0.0140226
sp|Q9UHK6-5|AMACR_HUMAN	AMACR	AMACR_HUMAN Isoform 4 of Alpha-methylacyl-CoA racemase	6	5.91896	6.57074	6.62412	6.26699	6.71708	6.55603	6.54051	6.77896	6.3452	6.64814	1.04774	0.0672856	0.0511864	0.0177839
sp|Q14651|PLSI_HUMAN	PLS1	PLSI_HUMAN Plastin-1	24	5.75986	6.26631	6.22189	6.28047	6.27132	6.02534	6.45163	6.95081	6.13213	6.42477	1.04772	0.0672571	0.0406764	0.0609833
sp|Q86V21|AACS_HUMAN	AACS	AACS_HUMAN Acetoacetyl-CoA synthetase	8	6.27814	5.98624	6.46931	6.42285	6.37205	6.21692	6.80498	6.963	6.28913	6.58924	1.04772	0.0672499	0.0346188	0.0534436
sp|Q9NQC1|JADE2_HUMAN	JADE2	JADE2_HUMAN Protein Jade-2	2	4.67629	8.41706	5.75255	5.98239	6.75964	6.17353	6.39189	6.68795	6.20707	6.50325	1.04772	0.0672484	0.254467	0.0417322
sp|O43676|NDUB3_HUMAN	NDUFB3	NDUB3_HUMAN NADH dehydrogenase [ubiquinone] 1 beta subcomplex subunit 3	6	5.95311	6.14385	6.31647	6.33975	6.22298	6.57523	6.7483	6.38771	6.1883	6.48356	1.04771	0.0672431	0.0290055	0.0351239
sp|Q9UGJ0|AAKG2_HUMAN	PRKAG2	AAKG2_HUMAN 5'-AMP-activated protein kinase subunit gamma-2	7	5.86253	5.9751	6.74542	6.74158	6.23742	6.57224	7.04947	6.67346	6.33116	6.63315	1.0477	0.0672243	0.0755545	0.0503976
sp|Q69YN4|VIR_HUMAN	KIAA1429	VIR_HUMAN Protein virilizer homolog	10	5.91245	5.79702	6.5044	6.76458	6.29145	6.52135	6.96498	6.39204	6.24461	6.54246	1.0477	0.06722	0.0744557	0.0453936
sp|O94854|K0754_HUMAN	KIAA0754	K0754_HUMAN Uncharacterized protein KIAA0754	3	5.1705	5.76379	6.9513	6.14956	6.15565	5.5545	6.04624	7.42419	6.00879	6.29514	1.04766	0.0671657	0.124202	0.126575
sp|Q7Z2Z2|ETUD1_HUMAN	EFTUD1	ETUD1_HUMAN Elongation factor Tu GTP-binding domain-containing protein 1	18	5.95291	5.93358	6.35181	6.1757	6.29754	6.14564	6.49162	6.6424	6.1035	6.3943	1.04764	0.0671497	0.0325518	0.0340506
sp|P04424|ARLY_HUMAN	ASL	ARLY_HUMAN Argininosuccinate lyase	18	6.29255	6.28917	5.96891	6.08392	6.58749	6.4481	6.27391	6.49873	6.15864	6.45206	1.04764	0.0671481	0.0259375	0.0204587
sp|P20337|RAB3B_HUMAN	RAB3B	RAB3B_HUMAN Ras-related protein Rab-3B	6	6.94019	5.84895	6.28627	5.54493	7.03582	5.65804	6.63899	6.46035	6.15508	6.4483	1.04764	0.0671401	0.0983613	0.0898123
sp|Q9UQ16-4|DYN3_HUMAN	DNM3	DYN3_HUMAN Isoform 4 of Dynamin-3	19	6.16948	5.74055	6.27636	6.4404	6.31226	5.95668	6.73478	6.79582	6.1567	6.44989	1.04762	0.0671168	0.0485601	0.0609103
sp|Q9BQG2|NUD12_HUMAN	NUDT12	NUD12_HUMAN Peroxisomal NADH pyrophosphatase NUDT12	20	5.90465	5.98708	5.90422	6.36268	6.07393	6.10839	6.67687	6.44933	6.03966	6.32713	1.0476	0.0670845	0.0362345	0.0455527
sp|Q5TA45-5|INT11_HUMAN	CPSF3L	INT11_HUMAN Isoform 5 of Integrator complex subunit 11	11	5.67928	5.57316	6.49807	6.37882	6.18461	6.08367	6.48543	6.52381	6.03233	6.31938	1.04758	0.0670671	0.0784846	0.0345592
sp|P20248|CCNA2_HUMAN	CCNA2	CCNA2_HUMAN Cyclin-A2	13	6.06472	6.03312	5.96654	6.08236	6.14037	6.49451	6.30788	6.35118	6.03669	6.32348	1.04751	0.0669634	0.00844953	0.0230602
sp|Q5T2S8|ARMC4_HUMAN	ARMC4	ARMC4_HUMAN Armadillo repeat-containing protein 4	1	5.99614	6.31289	6.47328	5.86958	6.02696	6.54274	7.00301	6.24993	6.16297	6.45566	1.04749	0.0669382	0.0451884	0.0653097
sp|Q709F0|ACD11_HUMAN	ACAD11	ACD11_HUMAN Acyl-CoA dehydrogenase family member 11	6	5.994	6.02462	6.51325	6.41624	6.17818	6.14106	6.80242	7.01099	6.23703	6.53316	1.04748	0.0669229	0.0426814	0.0673357
sp|Q9HB21|PKHA1_HUMAN	PLEKHA1	PKHA1_HUMAN Pleckstrin homology domain-containing family A member 1	3	5.85409	5.46519	6.56487	6.5374	6.74489	6.00895	6.41125	6.41541	6.10539	6.39513	1.04746	0.0668897	0.0882421	0.0470961
sp|Q8WUF5|IASPP_HUMAN	PPP1R13L	IASPP_HUMAN RelA-associated inhibitor	29	6.14052	6.23392	6.05664	6.3096	6.33564	6.61499	6.46348	6.5004	6.18517	6.47863	1.04745	0.066875	0.0178023	0.017766
sp|Q9UKN8|TF3C4_HUMAN	GTF3C4	TF3C4_HUMAN General transcription factor 3C polypeptide 4	31	6.0916	5.95716	6.17286	6.23934	6.24205	6.21399	6.68723	6.47792	6.11524	6.4053	1.04743	0.0668565	0.0198644	0.0346771
sp|Q9P289|MST4_HUMAN	MST4	MST4_HUMAN Serine/threonine-protein kinase MST4	9	6.28846	5.97205	6.27901	6.14118	6.37335	6.18214	6.71289	6.58283	6.17018	6.4628	1.04743	0.0668485	0.0240262	0.0361471
sp|Q8N9N2-2|ASCC1_HUMAN	ASCC1	ASCC1_HUMAN Isoform 2 of Activating signal cointegrator 1 complex subunit 1	10	6.1271	6.02447	6.2743	6.21107	6.45296	6.19162	6.74947	6.41085	6.15923	6.45122	1.04741	0.066822	0.017567	0.035571
sp|Q12816|TROP_HUMAN	TRO	TROP_HUMAN Trophinin	3	5.56769	5.91667	6.27373	6.24468	5.78841	6.03874	6.44987	6.86294	6.00069	6.28499	1.04738	0.0667814	0.0551559	0.0751046
sp|A6NHX0|GATL2_HUMAN	GATSL2	GATL2_HUMAN GATS-like protein 2	3	5.80629	5.4908	6.29476	6.06123	5.99951	5.96905	6.40521	6.39889	5.91327	6.19317	1.04733	0.0667207	0.058366	0.0390001
sp|Q2KHR2|RFX7_HUMAN	RFX7	RFX7_HUMAN DNA-binding protein RFX7	1	5.82104	5.91643	6.78306	6.04734	5.77676	6.0425	6.75592	7.15522	6.14197	6.4326	1.04732	0.0667011	0.0712062	0.0986892
sp|Q9UDX5|MTFP1_HUMAN	MTFP1	MTFP1_HUMAN Mitochondrial fission process protein 1	2	5.53922	6.37024	6.5729	6.3081	6.17748	6.34711	7.13214	6.30672	6.19761	6.49086	1.04732	0.0666971	0.0731343	0.0668011
sp|P40818|UBP8_HUMAN	USP8	UBP8_HUMAN Ubiquitin carboxyl-terminal hydrolase 8	16	5.70969	5.63766	6.12817	6.39244	6.09538	6.0014	6.38844	6.51199	5.96699	6.2493	1.04731	0.0666918	0.0597745	0.0384833
sp|P42898|MTHR_HUMAN	MTHFR	MTHR_HUMAN Methylenetetrahydrofolate reductase	4	5.76573	5.86963	6.43068	6.86095	6.08445	6.60535	6.7931	6.62331	6.23175	6.52655	1.04731	0.0666843	0.0820208	0.0469825
sp|Q9NZ01|TECR_HUMAN	TECR	TECR_HUMAN Very-long-chain enoyl-CoA reductase	9	5.82684	5.30196	6.51055	6.28733	6.15375	6.01867	6.41235	6.47055	5.98167	6.26383	1.04717	0.0664967	0.0894631	0.0341177
sp|Q9H479|FN3K_HUMAN	FN3K	FN3K_HUMAN Fructosamine-3-kinase	4	5.86329	6.19519	6.59738	6.02448	6.60708	6.58315	6.32096	6.33288	6.17009	6.46102	1.04715	0.066471	0.0511265	0.0240251
sp|P43686|PRS6B_HUMAN	PSMC4	PRS6B_HUMAN 26S protease regulatory subunit 6B	30	6.07441	5.87268	6.15589	6.50119	6.51222	6.0406	6.45236	6.75886	6.15104	6.44101	1.04714	0.066456	0.0425999	0.0462786
sp|Q8WVR3|CG043_HUMAN	C7orf43	CG043_HUMAN Uncharacterized protein C7orf43	1	6.06628	6.08494	6.36162	5.69963	5.96593	5.77992	7.18918	6.41674	6.05312	6.33794	1.04705	0.0663362	0.0448708	0.0989787
sp|P35232|PHB_HUMAN	PHB	PHB_HUMAN Prohibitin	47	5.98207	5.88847	6.14701	6.36152	6.15004	6.07379	6.74586	6.55642	6.09477	6.38153	1.04705	0.0663306	0.0340425	0.0505037
sp|Q96RS0|TGS1_HUMAN	TGS1	TGS1_HUMAN Trimethylguanosine synthase	6	5.65111	5.65741	6.56828	6.51314	6.54684	6.04473	6.40338	6.54176	6.09748	6.38418	1.04702	0.0662865	0.0840172	0.0369439
sp|Q9BZ23|PANK2_HUMAN	PANK2	PANK2_HUMAN Pantothenate kinase 2, mitochondrial	5	6.182	5.88916	5.92613	6.40858	6.63983	5.75831	6.83431	6.32075	6.10147	6.3883	1.04701	0.0662758	0.0397673	0.0736243
sp|O95340-2|PAPS2_HUMAN	PAPSS2	PAPS2_HUMAN Isoform B of Bifunctional 3'-phosphoadenosine 5'-phosphosulfate synthase 2	9	5.88374	5.8872	6.27205	6.99274	6.44312	5.75143	6.69693	7.321	6.25893	6.55312	1.047	0.0662653	0.0834084	0.0990965
sp|Q8WUX9|CHMP7_HUMAN	CHMP7	CHMP7_HUMAN Charged multivesicular body protein 7	15	6.09032	5.88505	6.34257	6.468	6.36243	5.9698	6.59348	7.02518	6.19649	6.48772	1.047	0.066262	0.0420134	0.0680062
sp|Q6ZNW5|GDPP1_HUMAN	GDPGP1	GDPP1_HUMAN GDP-D-glucose phosphorylase 1	3	5.84568	5.70206	6.20373	7.13843	6.49223	5.99584	6.72202	6.84936	6.22248	6.51486	1.04699	0.0662462	0.103825	0.0577531
sp|P52294|IMA5_HUMAN	KPNA1	IMA5_HUMAN Importin subunit alpha-5	16	5.7955	5.57608	6.18761	6.62439	5.98505	5.89285	6.82196	6.62001	6.04589	6.32997	1.04699	0.0662422	0.076286	0.0727515
sp|Q92989|CLP1_HUMAN	CLP1	CLP1_HUMAN Polyribonucleotide 5'-hydroxyl-kinase Clp1	9	5.58914	5.95623	6.49224	6.40598	6.37445	5.89252	6.68773	6.63688	6.1109	6.3979	1.04696	0.066213	0.0686939	0.0568639
sp|Q9NPB8|GPCP1_HUMAN	GPCPD1	GPCP1_HUMAN Glycerophosphocholine phosphodiesterase GPCPD1	5	5.87516	5.95441	6.00913	6.73226	6.07789	5.79036	6.93265	6.92368	6.14274	6.43114	1.04695	0.0661933	0.0646036	0.0910883
sp|P49336|CDK8_HUMAN	CDK8	CDK8_HUMAN Cyclin-dependent kinase 8	5	5.19056	5.05874	6.38981	6.28395	5.58566	5.91401	5.92469	6.57493	5.73076	5.99982	1.04695	0.0661921	0.122719	0.0690758
sp|P08559-4|ODPA_HUMAN	PDHA1	ODPA_HUMAN Isoform 4 of Pyruvate dehydrogenase E1 component subunit alpha, somatic form, mitochondrial	26	5.82175	5.97087	6.21287	6.48483	5.95628	6.12349	6.72475	6.83402	6.12258	6.40963	1.04688	0.0661025	0.0474212	0.0678148
sp|Q9H0S4|DDX47_HUMAN	DDX47	DDX47_HUMAN Probable ATP-dependent RNA helicase DDX47	15	5.97671	6.00498	6.14284	6.18092	6.3598	6.41427	6.47976	6.19067	6.07636	6.36113	1.04686	0.066074	0.0165605	0.0194569
sp|Q99726|ZNT3_HUMAN	SLC30A3	ZNT3_HUMAN Zinc transporter 3	3	6.0454	6.21638	6.39329	5.67462	6.15835	5.82354	6.33065	7.15664	6.08242	6.36729	1.04684	0.0660346	0.0504295	0.089015
sp|P51153|RAB13_HUMAN	RAB13	RAB13_HUMAN Ras-related protein Rab-13	12	6.03587	5.99304	6.24545	6.20609	6.35043	6.38416	6.605	6.28695	6.12011	6.40664	1.04682	0.0660086	0.0203089	0.0215788
sp|Q9UNQ2|DIM1_HUMAN	DIMT1	DIM1_HUMAN Probable dimethyladenosine transferase	15	6.34228	5.99085	6.29849	6.08114	6.67984	6.41921	6.43659	6.33238	6.17819	6.46701	1.04675	0.0659135	0.0273909	0.0230451
sp|Q6P1A2|MBOA5_HUMAN	LPCAT3	MBOA5_HUMAN Lysophospholipid acyltransferase 5	5	5.39611	5.54429	6.45432	6.77824	6.01136	6.61756	6.86462	5.80906	6.04324	6.32565	1.04673	0.0658915	0.112106	0.0785858
sp|Q8TDN6|BRX1_HUMAN	BRIX1	BRX1_HUMAN Ribosome biogenesis protein BRX1 homolog	11	6.13071	5.76682	6.15359	6.26166	6.60632	6.69916	6.13712	6.00608	6.0782	6.36217	1.04672	0.065876	0.0354209	0.0537343
sp|Q9NVP2|ASF1B_HUMAN	ASF1B	ASF1B_HUMAN Histone chaperone ASF1B	5	5.67093	6.20674	6.46809	5.99422	5.86021	6.45944	6.83595	6.3215	6.08499	6.36928	1.04672	0.0658731	0.0554282	0.0632802
sp|P52434|RPAB3_HUMAN	POLR2H	RPAB3_HUMAN DNA-directed RNA polymerases I, II, and III subunit RPABC3	4	5.85754	6.07703	6.38396	6.40322	6.30521	6.53784	6.37992	6.65243	6.18044	6.46885	1.04667	0.0658003	0.0423998	0.0241387
sp|Q9P2W9|STX18_HUMAN	STX18	STX18_HUMAN Syntaxin-18	7	6.46251	5.54439	6.51278	6.25362	6.27362	6.11868	6.81607	6.72027	6.19332	6.48216	1.04664	0.0657605	0.0721647	0.0522242
sp|Q9H8H2|DDX31_HUMAN	DDX31	DDX31_HUMAN Probable ATP-dependent RNA helicase DDX31	9	6.10082	6.00662	6.45847	6.2845	6.41103	6.77016	6.42362	6.40345	6.2126	6.50206	1.04659	0.0657002	0.0322655	0.0275179
sp|Q9BUP3-3|HTAI2_HUMAN	HTATIP2	HTAI2_HUMAN Isoform 3 of Oxidoreductase HTATIP2	14	5.69074	5.65018	6.4516	6.58388	6.03579	5.84716	6.89135	6.73772	6.0941	6.378	1.04659	0.0656921	0.080804	0.0805507
sp|Q8IWT0|ARCH_HUMAN	ZBTB8OS	ARCH_HUMAN Protein archease	3	5.912	6.14893	6.88162	6.17876	5.778	6.4759	7.21954	6.8179	6.28033	6.57283	1.04658	0.065676	0.0665968	0.0929368
sp|O94864|ST65G_HUMAN	SUPT7L	ST65G_HUMAN STAGA complex 65 subunit gamma	4	6.36871	5.93749	6.08805	6.04475	6.65497	6.73872	5.89011	6.29269	6.10975	6.39412	1.04654	0.065633	0.0300953	0.0606454
sp|Q9BZL4|PP12C_HUMAN	PPP1R12C	PP12C_HUMAN Protein phosphatase 1 regulatory subunit 12C	6	5.84679	6.15003	6.16262	6.17034	5.81115	6.81472	6.76093	6.07504	6.08244	6.36546	1.04653	0.0656134	0.0258656	0.0785402
sp|O15355|PPM1G_HUMAN	PPM1G	PPM1G_HUMAN Protein phosphatase 1G	33	5.97681	5.95951	6.08897	6.38267	5.90255	5.95291	6.72538	6.9625	6.10199	6.38584	1.04652	0.0655955	0.0320751	0.0842727
sp|Q9UJX5|APC4_HUMAN	ANAPC4	APC4_HUMAN Anaphase-promoting complex subunit 4	13	5.90928	5.65751	6.42626	6.49313	6.08669	6.08564	6.78008	6.67171	6.12155	6.40603	1.04647	0.0655347	0.0661084	0.0580685
sp|Q14966|ZN638_HUMAN	ZNF638	ZN638_HUMAN Zinc finger protein 638	22	6.37641	5.90707	6.14492	6.28643	6.3493	6.64605	6.46828	6.3997	6.17871	6.46583	1.04647	0.0655311	0.0331184	0.0200536
sp|O75369-8|FLNB_HUMAN	FLNB	FLNB_HUMAN Isoform 8 of Filamin-B	177	5.90812	5.9435	6.14866	6.36379	6.22601	6.16054	6.38202	6.72717	6.09102	6.37394	1.04645	0.0655011	0.0345603	0.0397169
sp|Q9NRW1|RAB6B_HUMAN	RAB6B	RAB6B_HUMAN Ras-related protein Rab-6B	2	6.51537	6.07789	6.01541	5.74331	6.39948	6.5175	6.51739	6.04854	6.088	6.37073	1.04644	0.065491	0.0525306	0.034827
sp|Q9P2H3|IFT80_HUMAN	IFT80	IFT80_HUMAN Intraflagellar transport protein 80 homolog	3	6.26934	5.77549	6.52128	6.29533	6.3817	6.17346	6.63856	6.82136	6.21536	6.50377	1.0464	0.0654383	0.0505707	0.0437634
sp|P57076|CU059_HUMAN	C21orf59	CU059_HUMAN UPF0769 protein C21orf59	7	5.72518	6.16535	6.12884	6.21975	6.38118	5.88701	6.35076	6.74482	6.05978	6.34094	1.0464	0.0654319	0.0373235	0.0554506
sp|O95163|ELP1_HUMAN	IKBKAP	ELP1_HUMAN Elongator complex protein 1	48	5.99655	5.77727	6.30242	6.31921	6.20777	6.14551	6.6252	6.54789	6.09886	6.38159	1.04636	0.0653763	0.0427441	0.0376243
sp|P29033|CXB2_HUMAN	GJB2	CXB2_HUMAN Gap junction beta-2 protein	1	6.78051	5.597	6.45787	5.05749	5.18952	6.67698	6.6583	6.47559	5.97322	6.2501	1.04635	0.0653704	0.132059	0.114057
sp|Q9ULC3|RAB23_HUMAN	RAB23	RAB23_HUMAN Ras-related protein Rab-23	7	6.25313	6.14611	6.202	6.09576	6.51467	6.5156	6.56621	6.24516	6.17425	6.46041	1.04635	0.0653618	0.0110423	0.0225228
sp|O14775|GBB5_HUMAN	GNB5	GBB5_HUMAN Guanine nucleotide-binding protein subunit beta-5	2	5.74365	5.39794	6.80873	6.79752	5.7937	6.43184	7.03639	6.63211	6.18696	6.47351	1.04632	0.0653175	0.117241	0.0800628
sp|P49411|EFTU_HUMAN	TUFM	EFTU_HUMAN Elongation factor Tu, mitochondrial	68	5.90871	5.7292	6.10546	6.25996	6.13345	5.88304	6.61455	6.48387	6.00083	6.27873	1.04631	0.0653095	0.0385285	0.0530256
sp|Q9BQ15|SOSB1_HUMAN	NABP2	SOSB1_HUMAN SOSS complex subunit B1	3	6.10734	5.83667	6.58295	5.827	6.08799	6.51768	6.59055	6.2852	6.08849	6.37035	1.04629	0.0652893	0.0581957	0.0359305
sp|Q9H9Q4-2|NHEJ1_HUMAN	NHEJ1	NHEJ1_HUMAN Isoform 2 of Non-homologous end-joining factor 1	4	5.548	5.32643	6.44458	6.88938	5.79481	6.69177	6.35127	6.49078	6.0521	6.33216	1.04627	0.0652619	0.122011	0.0607265
sp|Q15118|PDK1_HUMAN	PDK1	PDK1_HUMAN [Pyruvate dehydrogenase (acetyl-transferring)] kinase isozyme 1, mitochondrial	3	5.5049	6.73938	5.74467	6.11488	5.64894	6.22455	6.76317	6.58202	6.02596	6.30467	1.04625	0.0652304	0.0892378	0.0778951
sp|Q8N5Z0|AADAT_HUMAN	AADAT	AADAT_HUMAN Kynurenine/alpha-aminoadipate aminotransferase, mitochondrial	5	6.39523	6.73679	5.91574	5.77957	6.24946	5.87805	6.86339	6.98443	6.20683	6.49383	1.04624	0.065213	0.0710625	0.0803206
sp|Q96H20|SNF8_HUMAN	SNF8	SNF8_HUMAN Vacuolar-sorting protein SNF8	7	6.05668	5.91655	6.14023	6.2274	6.18299	6.30037	6.72375	6.2587	6.08521	6.36645	1.04622	0.0651815	0.0217403	0.038185
sp|Q14257|RCN2_HUMAN	RCN2	RCN2_HUMAN Reticulocalbin-2	23	5.88449	5.7305	6.15425	6.10514	5.99758	6.21949	6.57939	6.18079	5.96859	6.24431	1.04619	0.0651514	0.0330696	0.0389876
sp|P09110|THIK_HUMAN	ACAA1	THIK_HUMAN 3-ketoacyl-CoA thiolase, peroxisomal	19	5.88176	6.10304	6.20763	6.2809	6.35873	6.27967	6.4967	6.46813	6.11833	6.40081	1.04617	0.0651154	0.0284038	0.0156679
sp|P61081|UBC12_HUMAN	UBE2M	UBC12_HUMAN NEDD8-conjugating enzyme Ubc12	23	5.98026	5.84549	6.25094	6.21982	6.02277	6.17727	6.41995	6.79802	6.07413	6.3545	1.04616	0.065102	0.032033	0.0531687
sp|P25440-2|BRD2_HUMAN	BRD2	BRD2_HUMAN Isoform 2 of Bromodomain-containing protein 2	13	6.35574	6.22066	6.0497	6.00928	6.20037	6.56393	6.32619	6.68116	6.15885	6.44291	1.04612	0.0650532	0.0259909	0.0339879
sp|Q8WZ74|CTTB2_HUMAN	CTTNBP2	CTTB2_HUMAN Cortactin-binding protein 2	1	6.43684	5.49728	6.81235	6.10016	4.64055	8.09304	7.37687	5.88092	6.21166	6.49784	1.04607	0.064983	0.0898414	0.237545
sp|Q9UJX2|CDC23_HUMAN	CDC23	CDC23_HUMAN Cell division cycle protein 23 homolog	20	5.51211	5.71665	6.38499	6.30209	5.8317	6.29613	6.46623	6.4229	5.97896	6.25424	1.04604	0.06494	0.072005	0.0464953
sp|Q5VWZ2|LYPL1_HUMAN	LYPLAL1	LYPL1_HUMAN Lysophospholipase-like protein 1	9	6.00692	6.09231	6.01102	6.38247	6.20802	6.41861	6.58024	6.41154	6.12318	6.4046	1.04596	0.0648279	0.0289516	0.0238057
sp|P62745|RHOB_HUMAN	RHOB	RHOB_HUMAN Rho-related GTP-binding protein RhoB	22	6.30474	6.1508	6.09088	6.13056	6.56167	6.25299	6.27342	6.72224	6.16924	6.45258	1.04593	0.0647822	0.0151876	0.0354026
sp|Q6N069|NAA16_HUMAN	NAA16	NAA16_HUMAN N-alpha-acetyltransferase 16, NatA auxiliary subunit	12	5.81201	5.81557	6.46662	6.68979	6.29852	6.36727	6.5353	6.72094	6.196	6.48051	1.04592	0.0647702	0.0727314	0.0291084
sp|Q9BQL6|FERM1_HUMAN	FERMT1	FERM1_HUMAN Fermitin family homolog 1	19	5.88607	5.7756	6.33203	6.74032	5.99783	6.28442	6.81354	6.77388	6.18351	6.46742	1.04591	0.0647649	0.0715332	0.0610523
sp|Q15773|MLF2_HUMAN	MLF2	MLF2_HUMAN Myeloid leukemia factor 2	5	6.04688	6.03654	5.99253	6.25981	6.23176	6.15843	6.33002	6.73244	6.08394	6.36316	1.0459	0.064738	0.0196569	0.0402355
sp|Q9P1Y6|PHRF1_HUMAN	PHRF1	PHRF1_HUMAN PHD and RING finger domain-containing protein 1	2	6.00893	5.08375	6.26104	6.75819	6.06718	6.39984	6.42577	6.32515	6.02798	6.30448	1.04587	0.0647045	0.116498	0.0259899
sp|O75116|ROCK2_HUMAN	ROCK2	ROCK2_HUMAN Rho-associated protein kinase 2	70	6.07769	5.92755	6.163	6.41567	6.35209	6.12854	6.49635	6.73414	6.14598	6.42778	1.04585	0.0646781	0.0332654	0.0395449
sp|Q9ULX6|AKP8L_HUMAN	AKAP8L	AKP8L_HUMAN A-kinase anchor protein 8-like	9	6.22763	5.84225	6.00228	6.17928	6.33069	6.1303	6.58435	6.31743	6.06286	6.34069	1.04583	0.0646419	0.0290469	0.0294031
sp|P10589|COT1_HUMAN	NR2F1	COT1_HUMAN COUP transcription factor 1	1	5.18116	6.20904	4.79401	6.50998	4.13946	6.67412	6.68419	6.23635	5.67355	5.93353	1.04582	0.0646396	0.143999	0.204622
sp|Q53EL6|PDCD4_HUMAN	PDCD4	PDCD4_HUMAN Programmed cell death protein 4	14	5.80546	5.84882	6.20377	6.48863	6.0355	6.31081	6.66209	6.45343	6.08667	6.36546	1.0458	0.0646111	0.0528926	0.0413248
sp|Q9NVF7|FBX28_HUMAN	FBXO28	FBX28_HUMAN F-box only protein 28	2	6.27312	6.01329	6.21727	6.26535	7.10496	5.93048	6.25726	6.61055	6.19226	6.47581	1.04579	0.0645957	0.0196765	0.0776791
sp|Q9UQ90|SPG7_HUMAN	SPG7	SPG7_HUMAN Paraplegin	11	5.70593	6.24913	6.55223	6.23999	6.36027	6.11898	6.71659	6.68366	6.18682	6.46988	1.04575	0.0645398	0.0568781	0.0438726
sp|Q8NHQ9|DDX55_HUMAN	DDX55	DDX55_HUMAN ATP-dependent RNA helicase DDX55	4	6.01482	6.24369	6.2742	6.33362	6.42682	6.27283	6.93748	6.36657	6.21658	6.50092	1.04574	0.0645233	0.0224553	0.0458171
sp|Q5TG30|RHG40_HUMAN	ARHGAP40	RHG40_HUMAN Rho GTPase-activating protein 40	1	5.75726	6.75223	7.01834	6.85645	6.35851	7.21974	7.36398	6.64848	6.59607	6.89768	1.04573	0.064504	0.0863884	0.0687155
sp|Q9NVR5|KTU_HUMAN	DNAAF2	KTU_HUMAN Protein kintoun	6	5.64994	5.8237	6.40093	6.14976	5.99502	6.23917	6.31193	6.57535	6.00608	6.28037	1.04567	0.0644247	0.0557746	0.0380294
sp|Q9P2G1|AKIB1_HUMAN	ANKIB1	AKIB1_HUMAN Ankyrin repeat and IBR domain-containing protein 1	1	5.36357	3.68469	6.76709	6.41124	5.23529	5.47749	5.24889	7.27989	5.55665	5.81039	1.04566	0.0644203	0.248868	0.169687
sp|Q7L5D6|GET4_HUMAN	GET4	GET4_HUMAN Golgi to ER traffic protein 4 homolog	9	5.93714	6.35361	6.18705	6.42068	6.69545	6.41852	6.57794	6.34343	6.22462	6.50883	1.04566	0.0644136	0.0345974	0.024311
sp|O60341|KDM1A_HUMAN	KDM1A	KDM1A_HUMAN Lysine-specific histone demethylase 1A	31	5.91295	6.02261	6.22197	6.33324	6.31444	6.11063	6.62454	6.55938	6.12269	6.40225	1.04566	0.0644122	0.031017	0.0368364
sp|Q13148|TADBP_HUMAN	TARDBP	TADBP_HUMAN TAR DNA-binding protein 43	15	5.99147	5.80423	6.11307	6.41294	6.39489	6.00264	6.39934	6.63403	6.08043	6.35772	1.0456	0.0643379	0.0420188	0.0411708
sp|O94760|DDAH1_HUMAN	DDAH1	DDAH1_HUMAN N(G),N(G)-dimethylarginine dimethylaminohydrolase 1	23	5.80499	6.14897	6.20031	6.11278	6.47793	6.32502	6.31574	6.25487	6.06676	6.34339	1.0456	0.0643272	0.0293685	0.0149662
sp|Q9BVX2|T106C_HUMAN	TMEM106C	T106C_HUMAN Transmembrane protein 106C	1	5.95221	6.19445	7.04676	5.90678	7.11515	6.65785	6.13304	6.33751	6.27505	6.56089	1.04555	0.064264	0.0844204	0.0652355
sp|Q92620|PRP16_HUMAN	DHX38	PRP16_HUMAN Pre-mRNA-splicing factor ATP-dependent RNA helicase PRP16	20	6.06865	6.25403	6.00359	6.33253	6.41882	6.47163	6.25591	6.63557	6.1647	6.44548	1.04555	0.0642577	0.0250127	0.0242787
sp|Q96EY1|DNJA3_HUMAN	DNAJA3	DNJA3_HUMAN DnaJ homolog subfamily A member 3, mitochondrial	10	5.85732	6.05121	6.1748	6.25811	6.22178	6.21976	6.58371	6.42331	6.08536	6.36214	1.04548	0.0641695	0.0286219	0.0276458
sp|P00558|PGK1_HUMAN	PGK1	PGK1_HUMAN Phosphoglycerate kinase 1	147	6.13465	6.1179	6.0371	6.10373	6.41063	6.26957	6.29674	6.52523	6.09834	6.37554	1.04545	0.0641303	0.00700864	0.0183537
sp|Q86VP3-2|PACS2_HUMAN	PACS2	PACS2_HUMAN Isoform 2 of Phosphofurin acidic cluster sorting protein 2	3	6.00261	6.06953	6.47953	6.31679	5.99551	7.03217	6.72119	6.24939	6.21712	6.49957	1.04543	0.0640979	0.0355552	0.0715857
sp|Q92598|HS105_HUMAN	HSPH1	HS105_HUMAN Heat shock protein 105 kDa	114	6.02285	5.814	6.07943	6.30557	6.09508	6.01993	6.3821	6.82455	6.05546	6.33042	1.04541	0.0640629	0.0333697	0.0575823
sp|Q53T59|H1BP3_HUMAN	HS1BP3	H1BP3_HUMAN HCLS1-binding protein 3	7	5.79319	6.17693	6.10897	6.33593	5.96476	6.23692	6.46918	6.85235	6.10376	6.3808	1.04539	0.0640408	0.0373284	0.0589152
sp|P46736|BRCC3_HUMAN	BRCC3	BRCC3_HUMAN Lys-63-specific deubiquitinase BRCC36	7	6.01604	6.00294	6.37298	6.37027	6.16678	6.20682	6.45885	7.05355	6.19056	6.4715	1.04538	0.0640308	0.0337853	0.0632008
sp|O94804|STK10_HUMAN	STK10	STK10_HUMAN Serine/threonine-protein kinase 10	19	6.11606	6.37109	6.04566	6.2919	6.37888	6.69621	6.27193	6.60365	6.20618	6.48767	1.04536	0.0639949	0.0243357	0.0302205
sp|Q96RR1|PEO1_HUMAN	PEO1	PEO1_HUMAN Twinkle protein, mitochondrial	5	6.3776	5.9464	6.25404	6.06522	6.35252	6.76476	6.62936	6.01379	6.16082	6.44011	1.04533	0.0639636	0.0311938	0.051549
sp|O00541|PESC_HUMAN	PES1	PESC_HUMAN Pescadillo homolog	23	5.5305	5.66328	6.30832	6.67345	5.69744	5.93083	6.86811	6.77351	6.04389	6.31747	1.04527	0.0638707	0.0893415	0.0934277
sp|Q99733|NP1L4_HUMAN	NAP1L4	NP1L4_HUMAN Nucleosome assembly protein 1-like 4	16	6.25801	6.39007	5.98107	6.29284	6.29172	6.40541	6.66418	6.68855	6.2305	6.51246	1.04526	0.0638563	0.0281557	0.0299606
sp|Q8WVJ2|NUDC2_HUMAN	NUDCD2	NUDC2_HUMAN NudC domain-containing protein 2	8	6.01007	5.81898	6.28083	6.78372	6.32201	6.15796	6.33671	7.20303	6.2234	6.50493	1.04524	0.06383	0.0673035	0.0726221
sp|P54920|SNAA_HUMAN	NAPA	SNAA_HUMAN Alpha-soluble NSF attachment protein	14	5.94745	5.93043	5.99172	6.57629	5.91306	6.27195	6.81728	6.54843	6.11147	6.38768	1.04519	0.063772	0.0508802	0.0605683
sp|P05423|RPC4_HUMAN	POLR3D	RPC4_HUMAN DNA-directed RNA polymerase III subunit RPC4	7	6.03952	5.96496	6.23864	6.32872	6.30621	6.46753	6.55815	6.34977	6.14296	6.42042	1.04517	0.0637326	0.0275693	0.0178096
sp|Q00613|HSF1_HUMAN	HSF1	HSF1_HUMAN Heat shock factor protein 1	17	5.85312	5.97271	6.05511	6.1578	6.23971	6.22414	6.19253	6.46806	6.00968	6.28111	1.04516	0.0637302	0.0214564	0.0200871
sp|P20023-3|CR2_HUMAN	CR2	CR2_HUMAN Isoform C of Complement receptor type 2	2	6.69613	6.94411	5.93171	5.29583	6.68307	6.06524	6.56988	6.67254	6.21694	6.49768	1.04516	0.0637194	0.120663	0.0450593
sp|Q9BVN2|RUSC1_HUMAN	RUSC1	RUSC1_HUMAN RUN and SH3 domain-containing protein 1	2	5.56839	6.50878	6.95874	6.57844	6.04928	6.60404	7.1269	6.99054	6.40359	6.69269	1.04515	0.0637058	0.092272	0.0721281
sp|Q96K37|S35E1_HUMAN	SLC35E1	S35E1_HUMAN Solute carrier family 35 member E1	1	5.69556	5.87549	6.25714	6.2046	6.12778	6.60377	6.45398	5.93216	6.0082	6.27942	1.04514	0.0636996	0.04465	0.0485873
sp|Q8IY47|KBTB2_HUMAN	KBTBD2	KBTB2_HUMAN Kelch repeat and BTB domain-containing protein 2	2	5.78846	6.51888	6.64622	6.1008	6.10552	6.37357	6.71362	6.99249	6.26359	6.5463	1.04514	0.0636899	0.0627761	0.059242
sp|Q96NL6|SCLT1_HUMAN	SCLT1	SCLT1_HUMAN Sodium channel and clathrin linker 1	2	5.12291	6.21935	6.17679	6.40057	6.16561	6.77745	5.90923	6.14667	5.97991	6.24974	1.04512	0.0636736	0.0969096	0.0593052
sp|Q8N697|S15A4_HUMAN	SLC15A4	S15A4_HUMAN Solute carrier family 15 member 4	2	5.92008	5.84443	5.89347	6.30276	6.23921	5.77841	6.5326	6.49155	5.99018	6.26044	1.04512	0.0636641	0.0351785	0.0553552
sp|Q15750|TAB1_HUMAN	TAB1	TAB1_HUMAN TGF-beta-activated kinase 1 and MAP3K7-binding protein 1	13	5.80635	5.96123	6.41838	6.36397	6.33724	6.00031	6.52512	6.79376	6.13748	6.41411	1.04507	0.0636015	0.0489626	0.0519893
sp|Q86UL3|GPAT4_HUMAN	AGPAT6	GPAT4_HUMAN Glycerol-3-phosphate acyltransferase 4	4	5.17923	5.87768	6.86632	6.36179	5.77763	6.14701	6.3776	7.07666	6.07125	6.34473	1.04504	0.0635629	0.118382	0.0862071
sp|P27361|MK03_HUMAN	MAPK3	MK03_HUMAN Mitogen-activated protein kinase 3	26	5.91929	5.89633	6.03353	6.08853	6.17307	6.36749	6.34315	6.13132	5.98442	6.25376	1.04501	0.0635118	0.0153309	0.0190161
sp|Q9NWV4|CA123_HUMAN	C1orf123	CA123_HUMAN UPF0587 protein C1orf123	15	6.42422	5.93409	6.15024	5.8355	6.45728	6.37056	6.17697	6.43485	6.08601	6.35991	1.04501	0.0635102	0.0428835	0.0200287
sp|Q9NZP8|C1RL_HUMAN	C1RL	C1RL_HUMAN Complement C1r subcomponent-like protein	1	5.44298	5.91702	7.42279	6.68486	6.41243	7.0277	6.76025	6.4129	6.36691	6.65332	1.04498	0.0634805	0.136684	0.0448747
sp|Q9HB07|MYG1_HUMAN	C12orf10	MYG1_HUMAN UPF0160 protein MYG1, mitochondrial	23	6.07997	5.89553	6.12636	6.19575	6.35336	6.27679	6.21827	6.54198	6.0744	6.3476	1.04498	0.0634687	0.0211361	0.0221971
sp|P27338|AOFB_HUMAN	MAOB	AOFB_HUMAN Amine oxidase [flavin-containing] B	17	5.89569	6.12183	6.2555	6.28274	6.31417	6.69494	6.50957	6.13908	6.13894	6.41444	1.04488	0.0633337	0.0287926	0.0375029
sp|Q86VW0|SESD1_HUMAN	SESTD1	SESD1_HUMAN SEC14 domain and spectrin repeat-containing protein 1	6	5.45704	5.56415	6.50069	7.0655	6.11985	6.10485	6.49456	6.97142	6.14684	6.42267	1.04487	0.0633271	0.125472	0.0635003
sp|Q99536|VAT1_HUMAN	VAT1	VAT1_HUMAN Synaptic vesicle membrane protein VAT-1 homolog	27	5.96254	5.80353	6.16559	6.28621	6.21889	6.21559	6.53791	6.33202	6.05447	6.3261	1.04487	0.0633169	0.0353567	0.0239046
sp|Q9UJJ9|GNPTG_HUMAN	GNPTG	GNPTG_HUMAN N-acetylglucosamine-1-phosphotransferase subunit gamma	2	5.76286	6.90598	5.98525	5.8068	7.17491	5.98236	5.81198	6.58877	6.11522	6.38951	1.04485	0.0632992	0.0876291	0.0971464
sp|P38571|LICH_HUMAN	LIPA	LICH_HUMAN Lysosomal acid lipase/cholesteryl ester hydrolase	6	6.19032	6.2625	6.15253	5.83114	6.59697	6.5832	6.32774	6.02434	6.10912	6.38306	1.04484	0.0632836	0.0312409	0.0421885
sp|Q8NB16|MLKL_HUMAN	MLKL	MLKL_HUMAN Mixed lineage kinase domain-like protein	5	5.70329	5.93184	6.59034	6.55826	6.24251	6.54768	6.47728	6.62737	6.19593	6.47371	1.04483	0.0632713	0.0721353	0.0256237
sp|P55199|ELL_HUMAN	ELL	ELL_HUMAN RNA polymerase II elongation factor ELL	8	6.01579	5.86625	6.33478	6.41309	6.397	5.97241	6.34561	7.01895	6.15748	6.43349	1.04483	0.0632627	0.0421065	0.0674203
sp|Q96L93-2|KI16B_HUMAN	KIF16B	KI16B_HUMAN Isoform 2 of Kinesin-like protein KIF16B	3	5.82963	5.65743	6.63086	6.66557	6.14499	6.44785	6.24739	7.0535	6.19587	6.47343	1.0448	0.0632234	0.0850922	0.0628189
sp|O43747-2|AP1G1_HUMAN	AP1G1	AP1G1_HUMAN Isoform 2 of AP-1 complex subunit gamma-1	34	6.217	6.11262	6.00684	5.9866	6.13924	6.4058	6.51429	6.35277	6.08076	6.35302	1.04477	0.0631909	0.0174833	0.0248042
tr|Q5VZU9|Q5VZU9_HUMAN	TPP2	Q5VZU9_HUMAN Tripeptidyl-peptidase 2	2	5.58016	5.22963	6.49906	6.65276	6.43899	5.30897	6.77893	6.50749	5.9904	6.2586	1.04477	0.0631859	0.115837	0.103838
sp|Q12788|TBL3_HUMAN	TBL3	TBL3_HUMAN Transducin beta-like protein 3	11	6.02687	5.80434	5.85068	6.11293	6.15036	6.33198	6.25005	6.12772	5.94871	6.21503	1.04477	0.0631851	0.0244628	0.0151819
sp|O15068|MCF2L_HUMAN	MCF2L	MCF2L_HUMAN Guanine nucleotide exchange factor DBS	2	5.61359	5.37814	6.46307	7.31563	6.34966	6.33814	6.68522	6.50628	6.19261	6.46983	1.04477	0.0631797	0.142403	0.0251619
sp|Q8N5G2|MACOI_HUMAN	TMEM57	MACOI_HUMAN Macoilin	4	5.66551	5.87216	6.40118	6.68556	6.38278	6.77013	6.45143	6.12192	6.1561	6.43156	1.04475	0.0631526	0.076289	0.0414571
sp|Q5TDH0-3|DDI2_HUMAN	DDI2	DDI2_HUMAN Isoform 3 of Protein DDI1 homolog 2	20	5.9479	5.80628	6.35435	6.24996	6.4781	6.53564	6.04875	6.38549	6.08962	6.362	1.04473	0.0631264	0.0419905	0.0342342
sp|O00425|IF2B3_HUMAN	IGF2BP3	IF2B3_HUMAN Insulin-like growth factor 2 mRNA-binding protein 3	20	5.8818	5.86644	6.13722	6.25294	6.21261	6.21753	6.43362	6.35387	6.0346	6.30441	1.04471	0.0631026	0.0317066	0.0171614
sp|Q96AX1|VP33A_HUMAN	VPS33A	VP33A_HUMAN Vacuolar protein sorting-associated protein 33A	11	5.90103	5.83119	6.31258	6.63911	6.28692	6.32991	6.48218	6.68839	6.17098	6.44685	1.0447	0.0630954	0.061174	0.0281555
tr|G5EA36|G5EA36_HUMAN	CDC27	G5EA36_HUMAN Cell division cycle 27, isoform CRA_c	1	5.76054	5.57776	6.45681	5.95728	6.4252	6.23155	6.79128	5.36609	5.9381	6.20353	1.0447	0.0630886	0.0638161	0.0974631
sp|P53396|ACLY_HUMAN	ACLY	ACLY_HUMAN ATP-citrate synthase	118	5.81109	5.92336	6.18324	6.37506	6.08669	5.97346	6.63004	6.68713	6.07319	6.34433	1.04465	0.0630139	0.0419132	0.0577752
sp|P02786|TFR1_HUMAN	TFRC	TFR1_HUMAN Transferrin receptor protein 1	73	6.00646	6.04031	6.11124	6.10199	6.35309	6.2811	6.42507	6.28293	6.065	6.33555	1.04461	0.0629617	0.00826758	0.0108037
sp|Q8IYS2-2|K2013_HUMAN	KIAA2013	K2013_HUMAN Isoform 2 of Uncharacterized protein KIAA2013	12	5.89506	5.81726	6.18499	6.56291	6.11605	6.01115	6.62799	6.79581	6.11505	6.38775	1.04459	0.0629424	0.0552583	0.0599455
sp|Q8NBR6|FA63B_HUMAN	FAM63B	FA63B_HUMAN Protein FAM63B	2	6.0591	6.06855	6.6618	6.49356	6.37722	6.37697	7.48926	6.16614	6.32075	6.6024	1.04456	0.0628937	0.0481818	0.0908074
sp|Q8TEA1|NSUN6_HUMAN	NSUN6	NSUN6_HUMAN Putative methyltransferase NSUN6	10	5.795	5.76632	6.10268	6.37449	5.85183	6.24178	6.47368	6.54164	6.00962	6.27723	1.04453	0.0628543	0.0477509	0.0495923
sp|Q96PC3-4|AP1S3_HUMAN	AP1S3	AP1S3_HUMAN Isoform 4 of AP-1 complex subunit sigma-3	12	6.23664	6.21772	5.63555	6.53903	6.41558	6.63845	6.46129	6.20899	6.15724	6.43108	1.04447	0.0627778	0.0613363	0.0274481
sp|Q6ZMI0|PPR21_HUMAN	PPP1R21	PPR21_HUMAN Protein phosphatase 1 regulatory subunit 21	15	5.64561	6.04419	6.36451	6.42826	6.24611	5.90935	6.59396	6.82177	6.12064	6.3928	1.04447	0.0627643	0.0585749	0.0625523
sp|P28331-2|NDUS1_HUMAN	NDUFS1	NDUS1_HUMAN Isoform 2 of NADH-ubiquinone oxidoreductase 75 kDa subunit, mitochondrial	33	6.09776	5.95774	6.34305	6.30769	6.40186	6.25244	6.58487	6.56522	6.17656	6.4511	1.04445	0.0627411	0.0294119	0.0241488
sp|Q92922|SMRC1_HUMAN	SMARCC1	SMRC1_HUMAN SWI/SNF complex subunit SMARCC1	42	5.96261	5.94259	6.19292	6.45194	6.42669	6.2415	6.4885	6.484	6.13752	6.41017	1.04442	0.0627085	0.038845	0.018083
sp|P61006|RAB8A_HUMAN	RAB8A	RAB8A_HUMAN Ras-related protein Rab-8A	10	6.0311	6.19262	6.24511	5.87929	6.6782	6.10917	6.27712	6.36516	6.08703	6.35741	1.04442	0.0627012	0.0272306	0.037558
sp|Q9Y3D9|RT23_HUMAN	MRPS23	RT23_HUMAN 28S ribosomal protein S23, mitochondrial	13	6.66323	6.24105	5.93192	6.01383	6.43366	6.12986	6.84655	6.54371	6.21251	6.48845	1.04442	0.0626971	0.0527489	0.0456222
sp|Q9Y2X7-3|GIT1_HUMAN	GIT1	GIT1_HUMAN Isoform 3 of ARF GTPase-activating protein GIT1	19	5.74273	5.66404	6.29382	6.53518	5.96021	5.96375	6.58741	6.80063	6.05894	6.328	1.04441	0.0626836	0.069887	0.0681917
sp|Q969T4|UB2E3_HUMAN	UBE2E3	UB2E3_HUMAN Ubiquitin-conjugating enzyme E2 E3	8	6.04955	6.27627	5.96428	6.15695	6.33473	6.19272	6.58511	6.4199	6.11176	6.38312	1.0444	0.0626722	0.0220989	0.0257021
sp|P21281|VATB2_HUMAN	ATP6V1B2	VATB2_HUMAN V-type proton ATPase subunit B, brain isoform	29	6.3227	5.99303	6.05131	6.23429	6.48395	6.36008	6.33147	6.51724	6.15033	6.42319	1.04436	0.0626244	0.0250676	0.014193
sp|Q14764|MVP_HUMAN	MVP	MVP_HUMAN Major vault protein	47	5.85262	5.96452	6.43586	6.44656	6.34925	6.14722	6.72285	6.57577	6.17489	6.44877	1.04435	0.0626111	0.0503532	0.0392382
sp|Q01432-4|AMPD3_HUMAN	AMPD3	AMPD3_HUMAN Isoform 2 of AMP deaminase 3	10	5.63357	5.80357	6.60131	6.65941	5.84433	6.26791	6.57916	7.10173	6.17446	6.44828	1.04435	0.0626008	0.0860815	0.0821298
sp|Q99807|COQ7_HUMAN	COQ7	COQ7_HUMAN Ubiquinone biosynthesis protein COQ7 homolog	5	6.21109	5.85349	6.17249	6.13728	6.24007	6.36517	6.40576	6.44411	6.09359	6.36378	1.04434	0.0625916	0.0267295	0.0139141
sp|Q8IVV7|GID4_HUMAN	GID4	GID4_HUMAN Glucose-induced degradation protein 4 homolog	5	5.70821	6.0883	6.12306	6.26046	6.26792	6.10681	6.29267	6.58414	6.04501	6.31288	1.04431	0.0625553	0.0391258	0.0314795
sp|Q9BWT6|MND1_HUMAN	MND1	MND1_HUMAN Meiotic nuclear division protein 1 homolog	8	6.12889	6.13632	5.94542	6.23596	6.57056	6.54466	6.00314	6.41142	6.11165	6.38245	1.04431	0.0625479	0.0198136	0.041098
sp|Q9UPX8-3|SHAN2_HUMAN	SHANK2	SHAN2_HUMAN Isoform 3 of SH3 and multiple ankyrin repeat domains protein 2	3	5.90849	6.68115	5.85805	6.16008	6.69096	6.92551	5.58787	6.49328	6.15194	6.42441	1.04429	0.0625208	0.061237	0.0910598
[truncated: 6,302 more rows]

## Sheet: Filtered dataset - solvent-PISA
Uniprot Id	Gene Symbol	Description	Number of peptides	Veh_1	Veh_2	Veh_3	Veh_4	Vorinostat_1	Vorinostat_2	Vorinostst_3	Vorinostat_4	average (Veh)	average (Vorinostat)	fold change (Vorinostat/Veh)	log2 fold change (Vorinostat/Veh)	CV (Veh)	CV (Vorinostat)
sp|P07451|CAH3_HUMAN	CA3	CAH3_HUMAN Carbonic anhydrase 3	2	4.09537	3.86582	4.01539	5.2128	9.97531	7.37557	7.67319	8.77552	4.29734	8.4499	1.96631	0.975488	0.143734	0.139867
sp|Q13547|HDAC1_HUMAN	HDAC1	HDAC1_HUMAN Histone deacetylase 1	18	4.81943	4.72204	5.08057	5.3153	9.84656	9.88505	8.81223	8.83966	4.98433	9.34587	1.87505	0.906929	0.0536835	0.0642715
sp|Q9BT92|TCHP_HUMAN	TCHP	TCHP_HUMAN Trichoplein keratin filament-binding protein	2	5.11503	5.25389	6.05518	5.21065	9.29114	10.1328	9.77783	9.33925	5.40869	9.63526	1.78144	0.833044	0.0804044	0.0412501
sp|Q7RTV2|GSTA5_HUMAN	GSTA5	GSTA5_HUMAN Glutathione S-transferase A5	4	4.70091	4.43809	5.23573	5.32572	8.44767	7.7958	6.94089	7.69978	4.92511	7.72104	1.56769	0.648638	0.0864954	0.0799325
sp|Q92769|HDAC2_HUMAN	HDAC2	HDAC2_HUMAN Histone deacetylase 2	24	5.33626	5.72231	5.84366	5.78227	8.62204	8.40464	8.01096	8.13912	5.67112	8.29419	1.46253	0.548466	0.0403226	0.0329414
sp|P30837|AL1B1_HUMAN	ALDH1B1	AL1B1_HUMAN Aldehyde dehydrogenase X, mitochondrial	29	5.38053	5.41811	5.49896	5.58311	8.40762	8.63519	6.97266	7.23536	5.47018	7.81271	1.42824	0.514235	0.016463	0.106307
sp|Q9BV23|ABHD6_HUMAN	ABHD6	ABHD6_HUMAN Monoacylglycerol lipase ABHD6	7	5.46817	5.16999	5.77288	5.9619	8.69057	8.57767	7.43162	7.20954	5.59323	7.97735	1.42625	0.512227	0.0621882	0.0959169
sp|Q13488|VPP3_HUMAN	TCIRG1	VPP3_HUMAN V-type proton ATPase 116 kDa subunit a isoform 3	6	5.48472	5.83088	5.98317	6.29564	8.3771	8.25148	8.09337	7.70304	5.8986	8.10625	1.37427	0.458661	0.0571295	0.0361203
sp|Q96JH7|VCIP1_HUMAN	VCPIP1	VCIP1_HUMAN Deubiquitinating protein VCIP135	23	5.58467	5.47893	6.17416	5.99033	7.52891	7.36504	7.67253	8.04309	5.80702	7.65239	1.31778	0.398112	0.0567213	0.0377891
sp|Q8IVH2|FOXP4_HUMAN	FOXP4	FOXP4_HUMAN Forkhead box protein P4	2	5.87562	5.49401	5.73184	6.32911	6.95745	8.14171	8.25532	6.95415	5.85764	7.57716	1.29355	0.371336	0.0600073	0.0948879
[truncated: 6,938 more rows]

## Sheet: pbFDR - Perseus - solvent-PISA
Significant	-LOG(P-value)	log2 fold change	Protein Id	Gene Symbol	Description	Number of peptides	Veh_1	Veh_2	Veh_3	Veh_4	Vorinostat_1	Vorinostat_2	Vorinostst_3	Vorinostat_4
[truncated: 7,213 more rows]

[truncated: 3 more sheets: Legend - thermal-PISA, Full dataset - thermal-PISA, Filtered dataset - thermal-PISA]
