# Supplementary material for: Assessing target engagement using proteome-wide solvent shift assays
Source: eLife. 2021 Dec 8;10:e70784. doi: 10.7554/eLife.70784 (PMC8654358; doi:10.7554/eLife.70784)
Supplement: Figure 4—source data 1. [file elife-70784-fig4-data1.xlsx]

## Sheet: Legend
This table contains solvent-PISA data for DMSO- and Alisertib-treated HCT116 lysates (N=4)
The sixteen samples contained within represent one TMTpro 16plex
Full dataset tab - Unfiltered protein abundance data - 8580 proteins
Uniprot Id
Gene Symbol
Description
Number of peptides	Number of quantified peptides
Veh_1 (126)	TMT SSN scaled to 100
Veh_2 (127N)	TMT SSN scaled to 100
Veh_3 (127C)	TMT SSN scaled to 100
Veh_4 (128N)	TMT SSN scaled to 100
5uM_alisertib_1 (128C)	TMT SSN scaled to 100
5uM_alisertib_2 (129N)	TMT SSN scaled to 100
5uM_alisertib_3 (129C)	TMT SSN scaled to 100
5uM_alisertib_4 (130N)	TMT SSN scaled to 100
25uM_alisertib_1 (130C)	TMT SSN scaled to 100
25uM_alisertib_2 (131N)	TMT SSN scaled to 100
25uM_alisertib_3 (131C)	TMT SSN scaled to 100
25uM_alisertib_4 (132N)	TMT SSN scaled to 100
125uM_alisertib_1 (132C)	TMT SSN scaled to 100
125uM_alisertib_2 (133N)	TMT SSN scaled to 100
125uM_alisertib_3 (133C)	TMT SSN scaled to 100
125uM_alisertib_4 (134)	TMT SSN scaled to 100
Average (Veh)	Mean of Vehicle treated samples
Average (5uM)	Mean of 5uM Alisertib-treated samples
Average (25uM)	Mean of 25uM Alisertib-treated samples
Average (125uM)	Mean of 125uM Alisertib-treated samples
fold change (5uM/Veh)	fold change of 5uM Alisertib-treated samples compared to vehicle treated control
fold change (25uM/Veh)	fold change of 25uM Alisertib-treated samples compared to vehicle treated control
fold change (125uM/Veh)	fold change of 125uM Alisertib-treated samples compared to vehicle treated control
log2 fold change (5uM/Veh)	log2 trasnfomation of fold change
log2 fold change (25uM/Veh)	log2 trasnfomation of fold change
log2 fold change (125uM/Veh)	log2 trasnfomation of fold change
CV (Veh)	%CV of vehicle-treated samples
CV (5uM)	%CV of 5uM Alisertib-treated samples
CV (25uM)	%CV of 25uM Alisertib-treated samples
CV (125uM)	%CV of 125uM Alisertib-treated samples
Filtered dataset tab - 25uM Alisertib - Proteins quantified with at least two peptides, %CV < 15% - 7317 proteins
Uniprot Id
Gene Symbol
Description
Number of peptides	Number of quantified peptides
Veh_1 (126)	TMT SSN scaled to 100
Veh_2 (127N)	TMT SSN scaled to 100
Veh_3 (127C)	TMT SSN scaled to 100
Veh_4 (128N)	TMT SSN scaled to 100
25uM_alisertib_1 (130C)	TMT SSN scaled to 100
25uM_alisertib_2 (131N)	TMT SSN scaled to 100
25uM_alisertib_3 (131C)	TMT SSN scaled to 100
25uM_alisertib_4 (132N)	TMT SSN scaled to 100
Average (Veh)	Mean of Vehicle treated samples
Average (25uM)	Mean of 25uM Alisertib-treated samples
fold change (25uM/Veh)	fold change of 25uM Alisertib-treated samples compared to vehicle treated control
log2 fold change (25uM/Veh)	log2 trasnfomation of fold change
CV (Veh)	%CV of vehicle-treated samples
CV (25uM)	%CV of 25uM Alisertib-treated samples
pbFDR - Perseus (5uM) tab - Proteins quantified with at least two peptides - 7503 proteins
Significant	+ indicates an FDR < 0.05
-LOG(P-value)	nominal p-value
Difference	log2 transformation of fold change (5uM Alisertib/Vehicle)
Protein Id
Gene Symbol
Description
Number of peptides	Number of quantified peptides
Veh_1	TMT SSN scaled to 100 - log2 transformation
Veh_2	TMT SSN scaled to 100 - log2 transformation
Veh_3	TMT SSN scaled to 100 - log2 transformation
Veh_4	TMT SSN scaled to 100 - log2 transformation
5_alisertib_1	TMT SSN scaled to 100 - log2 transformation
5_alisertib_2	TMT SSN scaled to 100 - log2 transformation
5_alisertib_3	TMT SSN scaled to 100 - log2 transformation
5_alisertib_4	TMT SSN scaled to 100 - log2 transformation
pbFDR - Perseus (25uM) tab - Proteins quantified with at least two peptides - 7503 proteins
Significant	+ indicates an FDR < 0.05
-LOG(P-value)	nominal p-value
Difference	log2 transformation of fold change (25uM Alisertib/Vehicle)
Protein Id
Gene Symbol
Description
Number of peptides	Number of quantified peptides
Veh_1	TMT SSN scaled to 100 - log2 transformation
Veh_2	TMT SSN scaled to 100 - log2 transformation
Veh_3	TMT SSN scaled to 100 - log2 transformation
Veh_4	TMT SSN scaled to 100 - log2 transformation
25_alisertib_1	TMT SSN scaled to 100 - log2 transformation
25_alisertib_2	TMT SSN scaled to 100 - log2 transformation
25_alisertib_3	TMT SSN scaled to 100 - log2 transformation
25_alisertib_4	TMT SSN scaled to 100 - log2 transformation
pbFDR - Perseus (125uM) tab - Proteins quantified with at least two peptides - 7503 proteins
Significant	+ indicates an FDR < 0.05
-LOG(P-value)	nominal p-value
Difference	log2 transformation of fold change (125uM Alisertib/Vehicle)
Protein Id
Gene Symbol
Description
Number of peptides	Number of quantified peptides
Veh_1	TMT SSN scaled to 100 - log2 transformation
Veh_2	TMT SSN scaled to 100 - log2 transformation
Veh_3	TMT SSN scaled to 100 - log2 transformation
Veh_4	TMT SSN scaled to 100 - log2 transformation
125_alisertib_1	TMT SSN scaled to 100 - log2 transformation
125_alisertib_2	TMT SSN scaled to 100 - log2 transformation
125_alisertib_3	TMT SSN scaled to 100 - log2 transformation
125_alisertib_4	TMT SSN scaled to 100 - log2 transformation

## Sheet: Full dataset
Uniprot Id	Gene Symbol	Description	Number of peptides	Veh_1	Veh_2	Veh_3	Veh_4	5uM_alisertib_1	5uM_alisertib_2	5uM_alisertib_3	5uM_alisertib_4	25uM_alisertib_1	25uM_alisertib_2	25uM_alisertib_3	25uM_alisertib_4	125uM_alisertib_1	125uM_alisertib_2	125uM_alisertib_3	125uM_alisertib_4	Average (Veh)	Average (5uM)	Average (25uM)	Average (125uM)	fold change (5uM/Veh)	fold change (25uM/Veh)	fold change (125uM/Veh)	log2 fold change (5uM/Veh)	log2 fold change (25uM/Veh)	log2 fold change (125uM/Veh)	CV (Veh)	CV (5uM)	CV (25uM)	CV (125uM)
sp|Q8WVV4-1|POF1B_HUMAN	POF1B	POF1B_HUMAN Isoform 1 of Protein POF1B	5	2.25869	2.60539	2.72637	3.43064	2.33568	2.41812	2.46585	3.71768	0.774804	58.6608	4.13334	1.38147	1.7351	2.83434	2.60606	5.91571	2.75527	2.73433	16.2376	3.2728	0.9924	5.89328	1.18783	-0.0110063	2.55907	0.248332	0.178545	0.240558	1.74409	0.55747
sp|Q14956|GPNMB_HUMAN	GPNMB	GPNMB_HUMAN Transmembrane glycoprotein NMB	1	1.91535	3.01252	2.30612	2.69897	1.6716	1.70276	3.57339	15.9174	1.70705	44.1409	3.95002	0.862672	2.80657	3.39399	2.81724	7.52349	2.48324	5.71629	12.6652	4.13532	2.30195	5.10026	1.66529	1.20285	2.35057	0.735776	0.191801	1.19984	1.66001	0.550232
sp|P61024|CKS1_HUMAN	CKS1B	CKS1_HUMAN Cyclin-dependent kinases regulatory subunit 1	1	2.21042	3.57444	2.75164	3.0251	5.85634	16.6712	9.22093	5.90255	6.30855	25.6288	5.12108	4.35446	1.33221	3.06716	2.21515	2.75996	2.8904	9.41275	10.3532	2.34362	3.25656	3.58193	0.810829	1.70335	1.84074	-0.30253	0.196493	0.540641	0.986688	0.324612
sp|Q6ZV73|FGD6_HUMAN	FGD6	FGD6_HUMAN FYVE, RhoGEF and PH domain-containing protein 6	1	2.48269	3.26515	2.57182	4.28527	1.2216	3.13112	8.41277	9.49687	4.43724	27.9026	3.4099	2.02412	7.59127	4.5152	5.1042	10.1482	3.15123	5.56559	9.44346	6.83972	1.76616	2.99675	2.17049	0.820618	1.5834	1.11802	0.264342	0.721379	1.30733	0.376803
sp|Q6E0U4|DMKN_HUMAN	DMKN	DMKN_HUMAN Dermokine	1	2.1657	3.79621	2.73676	9.06545	2.07688	2.76531	6.65285	4.91254	2.44412	31.3893	13.3466	3.22681	4.02817	3.45876	4.17872	3.7558	4.44103	4.10189	12.6017	3.85536	0.923636	2.83756	0.868123	-0.114604	1.50465	-0.204028	0.710666	0.508496	1.06917	0.0822452
sp|Q5T750|XP32_HUMAN	XP32	XP32_HUMAN Skin-specific protein 32	1	1.62577	2.77393	4.71666	5.88652	1.87948	2.70708	5.5057	10.4024	3.60955	28.4659	4.53391	5.25864	5.46934	3.3308	4.45376	9.38059	3.75072	5.12366	10.467	5.65862	1.36605	2.79066	1.50868	0.450009	1.48061	0.593283	0.509699	0.750638	1.1482	0.464874
sp|Q9BZF2|OSBL7_HUMAN	OSBPL7	OSBL7_HUMAN Oxysterol-binding protein-related protein 7	3	2.981	4.18398	3.34182	4.3431	2.57397	3.6522	7.6587	7.89865	3.85049	29.073	4.34697	3.139	5.64059	4.04072	4.59295	8.68287	3.71247	5.44588	10.1024	5.73928	1.46691	2.72119	1.54595	0.552784	1.44424	0.628489	0.1768	0.501511	1.25286	0.360938
sp|Q6UWP8|SBSN_HUMAN	SBSN	SBSN_HUMAN Suprabasin	3	3.38987	4.39451	4.33711	7.34363	3.39852	4.06175	6.10195	4.73322	3.59272	28.2601	7.28432	4.31292	5.01026	4.17706	4.13862	5.46342	4.86628	4.57386	10.8625	4.69734	0.939909	2.2322	0.965284	-0.0894071	1.15847	-0.0509753	0.352345	0.252587	1.07783	0.138385
sp|Q9NZH6|IL37_HUMAN	IL37	IL37_HUMAN Interleukin-37	2	4.12008	4.76199	4.5676	6.2244	4.00366	4.39459	5.08806	5.5605	3.47557	29.5624	5.5252	4.64843	3.49197	4.67517	4.79194	5.10843	4.91852	4.7617	10.8029	4.51688	0.968117	2.19637	0.918341	-0.046746	1.13512	-0.122898	0.185245	0.146203	1.16029	0.156604
sp|Q15517|CDSN_HUMAN	CDSN	CDSN_HUMAN Corneodesmosin	4	2.72354	4.27213	3.46458	6.90893	2.59737	3.24225	6.71003	7.43791	3.02891	25.9664	5.70869	3.44251	5.38327	4.52869	4.1722	10.4126	4.3423	4.99689	9.53663	6.12419	1.15075	2.19622	1.41036	0.202573	1.13502	0.496061	0.420104	0.486511	1.15516	0.474144
sp|P05090|APOD_HUMAN	APOD	APOD_HUMAN Apolipoprotein D	1	2.57156	5.45087	4.70048	6.46765	2.91465	3.3726	5.97689	7.39061	4.52328	23.5378	6.55196	5.79572	8.07408	3.2083	3.38046	6.08311	4.79764	4.91369	10.1022	5.18649	1.02419	2.10566	1.08105	0.0344812	1.07427	0.112433	0.344193	0.433896	0.89051	0.449663
sp|A8K2U0|A2ML1_HUMAN	A2ML1	A2ML1_HUMAN Alpha-2-macroglobulin-like protein 1	3	1.93446	3.67897	3.13869	8.07772	2.29318	3.18462	3.88884	6.78035	2.77071	22.1404	4.31142	2.72884	13.7766	4.52974	3.29364	13.4718	4.20746	4.03675	7.98784	8.76794	0.959426	1.8985	2.0839	-0.0597562	0.924856	1.05929	0.637257	0.481108	1.18477	0.642289
sp|O14965|AURKA_HUMAN	AURKA	AURKA_HUMAN Aurora kinase A	8	3.55893	3.94563	3.65635	3.77415	7.16839	7.16088	7.45163	6.72842	7.07197	7.0821	6.99625	7.1377	7.05144	7.7256	6.63462	6.85594	3.73377	7.12733	7.072	7.0669	1.90889	1.89407	1.8927	0.932731	0.921488	0.920446	0.0445693	0.0418657	0.00822754	0.0666473
sp|P02787|TRFE_HUMAN	TF	TRFE_HUMAN Serotransferrin	1	4.51737	4.98806	6.39073	5.38577	4.5511	5.40776	5.56892	4.80244	4.48682	3.99434	18.768	10.7549	4.33449	4.64314	5.08052	6.32564	5.32048	5.08256	9.50101	5.09595	0.955281	1.78574	0.957798	-0.0660032	0.836525	-0.0622067	0.149781	0.0952582	0.726454	0.171718
sp|Q16610-2|ECM1_HUMAN	ECM1	ECM1_HUMAN Isoform 2 of Extracellular matrix protein 1	4	3.03162	4.50685	3.86916	8.70374	2.75972	3.50608	6.2375	8.80535	3.9459	21.9521	4.92882	4.03603	6.43786	4.54758	4.07508	8.65656	5.02784	5.32716	8.71571	5.92927	1.05953	1.73349	1.17929	0.0834278	0.793679	0.237915	0.501996	0.517893	1.01373	0.351675
tr|F8VS61|F8VS61_HUMAN	KRT77	F8VS61_HUMAN Keratin, type II cytoskeletal 1b	1	4.4755	5.73308	4.99249	6.00361	6.08891	8.64545	7.59309	8.18123	6.45793	14.62	7.31146	6.42079	2.56372	3.7961	3.77816	3.33847	5.30117	7.62717	8.70255	3.36911	1.43877	1.64163	0.635541	0.524837	0.715127	-0.653942	0.13146	0.145827	0.45577	0.1713
sp|P49862|KLK7_HUMAN	KLK7	KLK7_HUMAN Kallikrein-7	4	5.59126	5.32851	5.7935	5.16996	5.38114	4.96636	5.77528	5.08932	4.40091	20.3905	6.03451	4.88615	4.9145	5.55844	5.18392	5.53569	5.47081	5.30302	8.92802	5.29814	0.969331	1.63194	0.968438	-0.0449382	0.706586	-0.0462685	0.0505454	0.0678281	0.85935	0.0581152
sp|Q6NUJ1|SAPL1_HUMAN	PSAPL1	SAPL1_HUMAN Proactivator polypeptide-like 1	1	2.58873	4.42021	5.13883	6.66459	3.15136	5.5789	8.43969	6.84275	4.04928	17.8746	5.23042	3.27526	6.94806	6.9195	4.64072	8.23715	4.70309	6.00317	7.60739	6.68636	1.27643	1.61753	1.42169	0.352117	0.693793	0.507612	0.359749	0.371914	0.905942	0.223712
sp|Q562R1|ACTBL_HUMAN	ACTBL2	ACTBL_HUMAN Beta-actin-like protein 2	3	3.55151	6.51926	5.77569	6.65618	4.45475	4.3257	5.38642	5.54471	2.59693	13.5521	13.8596	6.00516	5.19642	6.36719	5.97819	4.23021	5.62566	4.92789	9.00345	5.443	0.875967	1.60043	0.967531	-0.191051	0.678455	-0.0476197	0.255234	0.127117	0.622729	0.173395
tr|Q9H552|Q9H552_HUMAN		Q9H552_HUMAN Uncharacterized protein	1	3.88548	3.10129	0.111982	5.34987	1.26401	6.40385	3.19185	16.3797	9.18103	0.409325	3.23085	6.8027	6.74648	9.42081	19.0495	5.47134	3.11216	6.80985	4.90598	10.172	2.18815	1.57639	3.26848	1.12971	0.656626	1.70862	0.709009	0.987235	0.78856	0.603898
sp|P25311|ZA2G_HUMAN	AZGP1	ZA2G_HUMAN Zinc-alpha-2-glycoprotein	7	3.90751	6.50954	5.3231	6.36186	3.60351	6.17921	6.61226	5.75237	4.16693	20.9164	4.64643	3.12037	5.08273	6.51911	4.07338	7.22523	5.5255	5.53684	8.21253	5.72511	1.00205	1.4863	1.03613	0.00295651	0.571722	0.0511984	0.217343	0.241264	1.03417	0.247465
sp|P21860|ERBB3_HUMAN	ERBB3	ERBB3_HUMAN Receptor tyrosine-protein kinase erbB-3	2	4.74154	5.80327	5.2106	5.39373	7.0473	10.0761	7.95326	8.37817	7.22002	8.46803	8.51153	6.27341	3.07016	4.35858	4.57747	2.91679	5.28729	8.36371	7.61825	3.73075	1.58185	1.44086	0.705608	0.661616	0.526932	-0.503061	0.0832536	0.151771	0.141523	0.23006
sp|Q68DK2|ZFY26_HUMAN	ZFYVE26	ZFY26_HUMAN Zinc finger FYVE domain-containing protein 26	1	5.08503	4.85231	5.79621	5.29748	5.33258	5.89254	8.57696	5.79225	7.93673	8.20452	7.69123	5.85397	6.04033	5.77872	5.17214	6.697	5.25776	6.39858	7.42161	5.92205	1.21698	1.41155	1.12634	0.283305	0.497285	0.171648	0.0765309	0.23014	0.143622	0.106683
sp|P42357|HUTH_HUMAN	HAL	HUTH_HUMAN Histidine ammonia-lyase	8	3.045	5.29204	4.16415	8.1651	2.84732	3.94708	9.38324	9.49582	5.44383	13.0004	4.90145	5.63768	5.48658	4.82177	5.90647	8.46204	5.16657	6.41836	7.24584	6.16921	1.24229	1.40245	1.19406	0.312998	0.487945	0.255879	0.425709	0.548055	0.531202	0.258128
sp|P31512|FMO4_HUMAN	FMO4	FMO4_HUMAN Dimethylaniline monooxygenase [N-oxide-forming] 4	1	4.62005	6.52695	5.14161	4.86961	7.50411	7.8229	6.67267	5.69197	7.60398	8.90654	6.41064	6.14419	5.27435	4.99245	6.24032	5.57766	5.28956	6.92291	7.26634	5.5212	1.30879	1.37371	1.04379	0.388233	0.458082	0.0618342	0.161069	0.137684	0.174	0.097021
sp|Q8WVE6|TM171_HUMAN	TMEM171	TM171_HUMAN Transmembrane protein 171	1	5.20606	4.4691	4.85166	5.76594	7.27075	6.6202	6.81162	6.39697	6.9165	6.82633	6.40834	6.9702	6.499	6.28106	6.15433	6.55193	5.07319	6.77489	6.78034	6.37158	1.33543	1.3365	1.25593	0.417303	0.418465	0.328758	0.108655	0.054831	0.0376097	0.0292435
sp|O60830-2|TI17B_HUMAN	TIMM17B	TI17B_HUMAN Isoform 2 of Mitochondrial import inner membrane translocase subunit Tim17-B	2	5.21911	6.71633	5.42138	3.94856	7.78611	7.63737	7.78138	6.0757	8.00289	8.39666	6.40009	5.35792	4.58086	5.90971	5.88795	4.87796	5.32634	7.32014	7.03939	5.31412	1.37433	1.32162	0.997705	0.458725	0.402305	-0.00331507	0.212711	0.113726	0.20101	0.129096
sp|P01859|IGHG2_HUMAN	IGHG2	IGHG2_HUMAN Ig gamma-2 chain C region	1	2.63695	4.99188	3.33185	4.70889	2.12359	3.97164	3.47141	22.8259	3.29707	8.95095	5.66612	2.76518	19.8939	2.74606	2.60085	6.01769	3.91739	8.09813	5.16983	7.81462	2.06723	1.31971	1.99485	1.0477	0.400223	0.996283	0.285911	1.21627	0.545193	1.05007
sp|Q8N4Q1-2|MIA40_HUMAN	CHCHD4	MIA40_HUMAN Isoform 2 of Mitochondrial intermembrane space import and assembly protein 40	5	4.53271	5.27349	5.80891	6.10872	6.265	8.35389	8.25806	7.45487	5.87051	7.77751	8.24439	6.70312	4.64352	4.77081	4.76614	5.16836	5.43096	7.58296	7.14888	4.83721	1.39625	1.31632	0.890673	0.481554	0.396511	-0.167032	0.127296	0.127483	0.149533	0.0472379
tr|H3BQF6|H3BQF6_HUMAN		H3BQF6_HUMAN Uncharacterized protein (Fragment)	1	5.80754	6.46579	4.96082	4.8255	5.80819	7.19064	6.16082	6.64702	7.2476	7.21553	6.99235	7.53512	5.68264	5.44817	6.19642	5.81586	5.51491	6.45167	7.24765	5.78577	1.16986	1.31419	1.04911	0.226334	0.394175	0.0691716	0.139362	0.0931239	0.0307337	0.0541204
sp|P17568|NDUB7_HUMAN	NDUFB7	NDUB7_HUMAN NADH dehydrogenase [ubiquinone] 1 beta subcomplex subunit 7	4	4.95605	5.93413	4.89612	5.74361	6.8337	8.22331	7.78306	7.48289	7.01432	7.22834	7.31107	6.64935	5.00251	5.43657	5.16771	4.33727	5.38248	7.58074	7.05077	4.98602	1.40841	1.30995	0.926342	0.494068	0.38951	-0.110383	0.0990746	0.0769735	0.0418938	0.0938685
sp|Q8N3Y1|FBXW8_HUMAN	FBXW8	FBXW8_HUMAN F-box/WD repeat-containing protein 8	2	5.15866	7.28665	4.24539	4.93724	5.86024	8.25686	6.10567	6.67385	6.73846	7.74077	7.36229	6.39301	4.9933	5.82603	7.1284	5.29315	5.40698	6.72415	7.05863	5.81022	1.24361	1.30547	1.07458	0.314529	0.384564	0.103768	0.242666	0.160187	0.0859059	0.162447
sp|Q9H1E1|RNAS7_HUMAN	RNASE7	RNAS7_HUMAN Ribonuclease 7	2	3.53109	5.73213	5.02328	8.09211	3.15017	3.80235	6.37205	9.41819	5.56982	12.9963	5.46124	5.13433	6.7961	4.315	3.50346	11.1023	5.59465	5.68569	7.29042	6.42922	1.01627	1.30311	1.14917	0.0232869	0.381954	0.200594	0.339782	0.501371	0.522387	0.531287
sp|Q9Y496|KIF3A_HUMAN	KIF3A	KIF3A_HUMAN Kinesin-like protein KIF3A	10	5.26322	6.27477	5.10285	5.58944	7.1212	7.5343	6.53098	6.66063	7.05014	6.95599	6.94422	7.90309	5.31603	5.41476	5.66855	4.66982	5.55757	6.96178	7.21336	5.26729	1.25267	1.29793	0.947769	0.325001	0.376217	-0.0773933	0.0934278	0.0657973	0.0640834	0.0807036
sp|Q5VT25-6|MRCKA_HUMAN	CDC42BPA	MRCKA_HUMAN Isoform 6 of Serine/threonine-protein kinase MRCK alpha	30	5.76605	6.0071	5.56333	5.80229	6.45125	6.40377	5.75539	5.68011	11.6824	6.32974	5.8855	6.07919	5.89766	5.71577	5.57974	5.40074	5.78469	6.07263	7.49421	5.64848	1.04978	1.29552	0.976453	0.0700812	0.373536	-0.0343782	0.031423	0.0677446	0.373361	0.037237
sp|O75808|CAN15_HUMAN	CAPN15	CAN15_HUMAN Calpain-15	2	5.35737	5.95723	5.55461	5.58368	6.86971	7.42103	6.44969	7.08671	6.83667	7.44658	7.73987	7.0573	5.83514	5.09556	4.97569	4.73316	5.61322	6.95678	7.2701	5.15989	1.23936	1.29517	0.919238	0.309591	0.373147	-0.12149	0.0446101	0.0585149	0.0553042	0.0920055
sp|P35270|SPRE_HUMAN	SPR	SPRE_HUMAN Sepiapterin reductase	21	5.03246	5.75255	4.68992	4.92864	6.47251	6.34864	5.75484	5.875	6.75279	6.36108	6.74456	6.35822	7.61154	7.0232	7.35624	6.93783	5.10089	6.11275	6.55416	7.2322	1.19837	1.28491	1.41783	0.261071	0.361662	0.503685	0.0896895	0.0574282	0.0342732	0.0429618
sp|Q13882|PTK6_HUMAN	PTK6	PTK6_HUMAN Protein-tyrosine kinase 6	1	5.77524	5.98551	5.27492	5.10824	5.88557	6.24291	5.64184	6.22074	6.61702	10.0619	5.4093	6.3122	8.3333	5.85129	5.6048	5.67516	5.53598	5.99776	7.10011	6.36614	1.08342	1.28254	1.14996	0.115587	0.359002	0.20158	0.0745102	0.0480422	0.287324	0.206645
sp|Q16739|CEGT_HUMAN	UGCG	CEGT_HUMAN Ceramide glucosyltransferase	1	6.13826	6.1652	5.0722	5.3378	5.29497	9.05741	6.60387	4.91976	8.53311	6.10867	7.39899	7.04095	5.61891	4.37712	6.17324	6.15955	5.67836	6.469	7.27043	5.5822	1.13924	1.28037	0.983066	0.188068	0.356565	-0.0246405	0.0981541	0.289151	0.137847	0.151167
sp|Q9BYJ1-2|LOXE3_HUMAN	ALOXE3	LOXE3_HUMAN Isoform 2 of Hydroperoxide isomerase ALOXE3	2	3.87572	4.77184	5.141	10.4145	5.07326	4.34721	4.964	8.94466	4.42685	15.4022	4.93879	6.206	4.66915	6.83817	4.89688	5.08975	6.05077	5.83228	7.74346	5.37349	0.963892	1.27975	0.888067	-0.053057	0.355861	-0.171259	0.488743	0.359961	0.666408	0.184512
sp|Q53S58|TM177_HUMAN	TMEM177	TM177_HUMAN Transmembrane protein 177	1	5.4462	6.67624	4.94206	4.83053	7.07666	7.24332	6.04999	6.19	6.86943	6.97114	6.94055	7.22619	6.35531	5.84756	6.04066	5.29417	5.47376	6.63999	7.00183	5.88443	1.21306	1.27916	1.07502	0.27865	0.3552	0.10437	0.154412	0.0914129	0.0222121	0.0757396
sp|Q7RTP0|NIPA1_HUMAN	NIPA1	NIPA1_HUMAN Magnesium transporter NIPA1	1	4.87823	6.09416	5.9223	5.56991	5.77765	6.36912	7.23226	5.55903	6.70758	6.92708	7.29118	7.72399	5.59334	6.66774	6.34559	5.34083	5.61615	6.23452	7.16246	5.98688	1.1101	1.27533	1.06601	0.150696	0.350873	0.0922217	0.0958257	0.119981	0.0621363	0.104066
sp|Q86W33|TPRA1_HUMAN	TPRA1	TPRA1_HUMAN Transmembrane protein adipocyte-associated 1	1	5.10637	7.13106	3.41424	4.71133	6.91737	7.95757	5.84256	6.96375	6.84677	6.41484	6.11017	6.52984	6.16886	6.0471	8.10516	5.73302	5.09075	6.92031	6.47541	6.51354	1.35939	1.27199	1.27948	0.442959	0.347092	0.355563	0.302572	0.124846	0.0470054	0.165325
sp|Q5W0U4|BSPRY_HUMAN	BSPRY	BSPRY_HUMAN B box and SPRY domain-containing protein	7	5.41426	6.21109	5.77558	5.32092	6.71532	8.12539	7.87183	6.92411	6.78727	7.85849	7.74617	6.49907	4.43961	4.78927	4.94501	4.5766	5.68046	7.40916	7.22275	4.68762	1.30432	1.27151	0.825218	0.383302	0.34654	-0.277152	0.0712008	0.0936298	0.0942924	0.0477678
sp|Q8N655|CJ012_HUMAN	C10orf12	CJ012_HUMAN Uncharacterized protein C10orf12	1	4.71752	5.05935	6.94895	5.61792	5.83032	6.9772	5.33732	7.10528	7.28455	6.39213	8.03115	6.70055	5.09692	7.44277	7.15414	4.30392	5.58593	6.31253	7.1021	5.99944	1.13008	1.27142	1.07403	0.17642	0.346446	0.103028	0.175717	0.137307	0.101591	0.256529
sp|Q9BQ65|USB1_HUMAN	USB1	USB1_HUMAN U6 snRNA phosphodiesterase	1	4.53294	6.83718	5.4587	5.93499	7.14268	7.16768	5.46957	6.61211	6.7892	8.15112	7.19113	6.76355	5.95927	5.33029	5.93132	4.72825	5.69095	6.59801	7.22375	5.48728	1.15939	1.26934	0.964212	0.213361	0.344078	-0.0525783	0.168796	0.120449	0.0897747	0.1063
sp|Q13227|GPS2_HUMAN	GPS2	GPS2_HUMAN G protein pathway suppressor 2	1	4.81874	5.22482	6.55573	6.0538	8.51642	5.94611	5.60538	5.14614	4.66741	6.28884	6.04633	11.7353	5.78264	6.41512	5.70744	5.48972	5.66327	6.30351	7.18447	5.84873	1.11305	1.26861	1.03275	0.15452	0.343246	0.0464874	0.138829	0.239747	0.433823	0.0679633
sp|Q8N6S4|AN13C_HUMAN	ANKRD13C	AN13C_HUMAN Ankyrin repeat domain-containing protein 13C	1	5.11604	6.76348	5.09166	4.73404	7.31707	8.52719	5.89222	7.5028	6.90533	6.01509	8.18367	6.37206	4.97694	6.2534	5.81798	4.53104	5.42631	7.30982	6.86904	5.39484	1.34711	1.26588	0.994201	0.429866	0.340138	-0.00838997	0.167405	0.148372	0.138258	0.145048
sp|Q8N394|TMTC2_HUMAN	TMTC2	TMTC2_HUMAN Transmembrane and TPR repeat-containing protein 2	1	5.17747	6.75964	4.82487	5.72127	7.28007	7.27802	5.89437	5.61202	7.86304	6.43068	7.43225	6.71577	5.70597	5.94204	5.80967	5.55285	5.62081	6.51612	7.11043	5.75263	1.15928	1.26502	1.02345	0.213234	0.339159	0.0334436	0.150159	0.136348	0.0921443	0.0286023
sp|P10620|MGST1_HUMAN	MGST1	MGST1_HUMAN Microsomal glutathione S-transferase 1	5	5.50242	7.30776	4.94416	4.97156	7.37382	8.75388	6.2515	6.64781	7.18392	7.96498	7.41417	6.16469	4.8194	5.63214	5.02078	4.04701	5.68147	7.25675	7.18194	4.87983	1.27727	1.2641	0.858902	0.353059	0.338108	-0.219434	0.196115	0.151717	0.104873	0.134017
sp|P61968|LMO4_HUMAN	LMO4	LMO4_HUMAN LIM domain transcription factor LMO4	1	6.65665	4.3572	4.50266	6.05562	9.11672	7.40289	7.06727	7.35214	7.84186	5.81272	6.25564	7.34856	5.01002	6.85411	4.73045	3.63549	5.39303	7.73475	6.81469	5.05752	1.43421	1.26361	0.937787	0.520259	0.337552	-0.0926673	0.211456	0.120634	0.138087	0.264271
sp|Q02218-2|ODO1_HUMAN	OGDH	ODO1_HUMAN Isoform 2 of 2-oxoglutarate dehydrogenase, mitochondrial	1	4.36503	4.84925	6.27895	5.34888	6.51464	6.4304	7.15619	7.31444	7.00351	7.69201	6.46172	5.16333	7.32789	5.87483	6.06071	6.15823	5.21053	6.85392	6.58014	6.35541	1.3154	1.26286	1.21973	0.395499	0.336689	0.286557	0.156938	0.0651365	0.162662	0.103674
sp|O15530|PDPK1_HUMAN	PDPK1	PDPK1_HUMAN 3-phosphoinositide-dependent protein kinase 1	15	5.14829	5.7569	5.30742	5.44304	6.53744	6.51612	6.00962	6.25688	7.06974	6.57318	6.66211	6.97434	6.8281	6.35936	6.51034	6.04713	5.41391	6.33002	6.81984	6.43623	1.16921	1.25969	1.18883	0.225537	0.333067	0.249545	0.0477376	0.0393003	0.035114	0.0504545
sp|O43741|AAKB2_HUMAN	PRKAB2	AAKB2_HUMAN 5'-AMP-activated protein kinase subunit beta-2	3	5.34738	6.26476	4.98569	5.45031	6.72473	7.62093	6.62694	6.32248	6.91062	7.25553	7.08698	6.45194	5.61933	6.45807	5.88924	4.98506	5.51204	6.82377	6.92627	5.73793	1.23798	1.25657	1.04098	0.307984	0.329493	0.0579441	0.0979537	0.0818261	0.0499774	0.106599
sp|Q05193|DYN1_HUMAN	DNM1	DYN1_HUMAN Dynamin-1	1	4.34846	5.94805	6.90875	5.33554	6.21396	6.6135	5.87434	5.8192	7.87367	7.92713	6.45975	5.97834	6.10997	5.84374	6.29238	6.45322	5.6352	6.13025	7.05972	6.17483	1.08785	1.25279	1.09576	0.121479	0.325145	0.131932	0.190722	0.0597716	0.140327	0.0423493
sp|O43395|PRPF3_HUMAN	PRPF3	PRPF3_HUMAN U4/U6 small nuclear ribonucleoprotein Prp3	22	5.29282	6.41332	4.99069	5.59745	7.29262	8.20447	6.12157	6.6385	7.70971	7.13643	6.57349	6.47381	5.99555	5.36088	5.40673	4.79196	5.57357	7.06429	6.97336	5.38878	1.26746	1.25115	0.966845	0.341943	0.323252	-0.048643	0.109838	0.127196	0.0818883	0.0912551
sp|Q9P0T7|TMEM9_HUMAN	TMEM9	TMEM9_HUMAN Transmembrane protein 9	1	6.62591	7.30129	5.91891	4.01271	6.71264	6.98248	6.39745	4.82115	7.17632	8.00665	7.96687	6.66697	5.65731	6.09391	4.92568	4.73378	5.96471	6.22843	7.4542	5.35267	1.04421	1.24972	0.897391	0.0624178	0.321603	-0.156192	0.237808	0.155444	0.0871124	0.11853
sp|Q3SYG4-3|PTHB1_HUMAN	BBS9	PTHB1_HUMAN Isoform 3 of Protein PTHB1	1	4.72655	4.98812	7.75778	6.45051	6.98318	6.43745	5.44495	6.02015	9.22844	5.78923	7.70161	7.12585	5.44896	5.03799	6.03428	4.82495	5.98074	6.22143	7.46128	5.33655	1.04024	1.24755	0.892288	0.0569228	0.3191	-0.164418	0.235213	0.104595	0.190939	0.0997641
sp|Q9NRG7|D39U1_HUMAN	SDR39U1	D39U1_HUMAN Epimerase family protein SDR39U1	9	5.06313	5.51501	5.03171	5.36319	5.89117	6.1624	6.01321	5.8573	6.5766	6.17794	6.73286	6.67389	7.07535	7.20263	7.40152	7.26209	5.24326	5.98102	6.54032	7.2354	1.14071	1.24738	1.37994	0.189927	0.318898	0.464608	0.0447865	0.0231098	0.0382293	0.0187133
sp|O43189|PHF1_HUMAN	PHF1	PHF1_HUMAN PHD finger protein 1	1	5.24275	6.53911	6.269	5.27877	6.62918	8.37784	7.04536	6.42853	7.2419	6.99808	7.44059	7.40741	4.8442	4.50871	5.02675	4.72184	5.83241	7.12023	7.27199	4.77538	1.2208	1.24683	0.818766	0.287832	0.31826	-0.288477	0.114771	0.123154	0.0278101	0.0455436
sp|Q0GE19|NTCP7_HUMAN	SLC10A7	NTCP7_HUMAN Sodium/bile acid cotransporter 7	1	6.12356	5.65164	4.5335	4.96609	4.39451	8.72797	7.23615	5.51088	5.38455	6.73835	7.86824	6.49787	5.74412	8.50915	5.50238	6.61104	5.3187	6.46738	6.62225	6.59167	1.21597	1.24509	1.23934	0.282108	0.316249	0.309572	0.132926	0.294905	0.153832	0.206937
sp|Q92771|DDX12_HUMAN	DDX12P	DDX12_HUMAN Putative ATP-dependent RNA helicase DDX12	1	4.36828	5.8691	5.18753	5.62408	7.19726	7.68879	6.58154	5.95192	7.3912	5.48517	6.6502	6.64829	7.29639	5.87794	6.23409	5.94824	5.26225	6.85488	6.54371	6.33916	1.30265	1.24352	1.20465	0.381452	0.314431	0.268614	0.125285	0.109902	0.120362	0.103558
sp|Q9NNX1|TUFT1_HUMAN	TUFT1	TUFT1_HUMAN Tuftelin	1	5.00728	5.7507	5.76347	7.18042	4.88655	5.27632	6.49068	5.81268	5.24928	13.2506	6.18296	4.79085	5.8078	6.58477	5.27965	6.68595	5.92547	5.61656	7.36842	6.08954	0.947867	1.24352	1.02769	-0.0772428	0.314427	0.0394049	0.153279	0.123833	0.537972	0.109597
sp|P58107|EPIPL_HUMAN	EPPK1	EPIPL_HUMAN Epiplakin	53	5.82606	5.90245	5.74289	6.10966	6.06818	6.0004	5.79035	6.34289	5.86175	11.4764	6.17129	5.78433	5.78034	5.74633	5.54295	5.85373	5.89527	6.05046	7.32344	5.73084	1.02632	1.24226	0.972109	0.037487	0.312965	-0.0408107	0.0266455	0.037688	0.37874	0.0232139
sp|Q96DR7|ARHGQ_HUMAN	ARHGEF26	ARHGQ_HUMAN Rho guanine nucleotide exchange factor 26	1	6.12357	4.9996	6.21326	5.95781	6.53664	6.94176	5.91819	6.31738	8.98755	6.68507	6.19367	7.01986	6.63659	4.94587	5.45515	5.06803	5.82356	6.42849	7.22154	5.52641	1.10388	1.24006	0.948975	0.142579	0.310405	-0.0755588	0.0960591	0.0664781	0.169667	0.139566
sp|Q9H9L7|AKIR1_HUMAN	AKIRIN1	AKIR1_HUMAN Akirin-1	1	5.09216	5.02867	6.0477	6.56357	5.92327	7.11194	6.60692	5.69784	7.47358	6.84547	6.19151	7.66883	6.48753	5.53171	6.3237	5.4056	5.68303	6.33499	7.04485	5.93713	1.11472	1.23963	1.04471	0.156684	0.309909	0.0631079	0.1319	0.102019	0.0949071	0.0922161
sp|P60604|UB2G2_HUMAN	UBE2G2	UB2G2_HUMAN Ubiquitin-conjugating enzyme E2 G2	5	4.72683	6.79141	5.07083	5.31067	6.5172	8.66925	7.2336	7.40542	6.79833	7.52372	6.99237	5.79589	5.27095	5.46717	5.90978	4.51658	5.47494	7.45637	6.77758	5.29112	1.36191	1.23793	0.966426	0.445631	0.307928	-0.0492687	0.16617	0.120088	0.106635	0.109881
sp|Q9Y5U9|IR3IP_HUMAN	IER3IP1	IR3IP_HUMAN Immediate early response 3-interacting protein 1	1	7.64054	6.63116	4.1371	4.1511	8.41243	6.78376	5.70357	6.4384	7.88401	6.18722	6.24534	7.59385	5.06672	5.68811	5.48824	5.94844	5.63997	6.83454	6.9776	5.54788	1.2118	1.23717	0.983671	0.277155	0.307043	-0.0237528	0.314854	0.16743	0.127173	0.0670553
sp|Q5T2S8|ARMC4_HUMAN	ARMC4	ARMC4_HUMAN Armadillo repeat-containing protein 4	2	4.90643	6.87691	6.66293	5.35076	6.36034	7.3316	7.28537	8.31	7.35096	7.72804	6.83917	7.49755	4.19719	4.49737	4.63393	4.17146	5.94926	7.32183	7.35393	4.37499	1.23071	1.23611	0.735384	0.299494	0.305806	-0.443431	0.162839	0.108759	0.0512161	0.0519659
sp|Q13045-2|FLII_HUMAN	FLII	FLII_HUMAN Isoform 2 of Protein flightless-1 homolog	1	6.01497	6.02649	5.20383	5.28909	6.92024	7.49094	6.80017	6.57318	6.9215	7.50071	7.10502	6.29307	5.62726	5.63197	5.61378	4.9878	5.63359	6.94613	6.95507	5.4652	1.23298	1.23457	0.970109	0.302154	0.30401	-0.0437809	0.0795944	0.0562437	0.0723476	0.0582525
sp|Q13057-2|COASY_HUMAN	COASY	COASY_HUMAN Isoform 2 of Bifunctional coenzyme A synthase	8	5.55693	6.54953	4.97197	5.6845	7.34215	7.95924	6.52156	6.32129	7.18335	7.16732	6.90362	6.84634	5.43741	5.67517	5.38567	4.49395	5.69073	7.03606	7.02516	5.24805	1.23641	1.23449	0.92221	0.306153	0.303916	-0.116833	0.114428	0.107664	0.024925	0.0987599
sp|Q709F0|ACD11_HUMAN	ACAD11	ACD11_HUMAN Acyl-CoA dehydrogenase family member 11	8	5.3099	5.74123	5.17054	5.31134	6.6336	6.14876	6.04837	5.34894	6.90672	6.6883	6.56855	6.41221	6.94716	7.4957	6.38652	6.88215	5.38325	6.04492	6.64395	6.92788	1.12291	1.23419	1.28693	0.167245	0.303562	0.363936	0.0459982	0.0876263	0.0313804	0.0655114
sp|Q8NBR6|FA63B_HUMAN	FAM63B	FA63B_HUMAN Protein FAM63B	1	4.74176	5.25394	5.62515	6.96362	5.42562	6.42565	6.53825	6.20325	8.14669	5.6229	5.84963	8.24845	6.76515	5.19288	5.99033	7.00674	5.64612	6.14819	6.96692	6.23878	1.08892	1.23393	1.10497	0.122903	0.303261	0.144004	0.16827	0.0815559	0.204488	0.131607
sp|P29317|EPHA2_HUMAN	EPHA2	EPHA2_HUMAN Ephrin type-A receptor 2	42	5.39957	5.80602	5.23879	5.30926	6.51601	6.67008	6.00776	6.1196	6.99703	6.72249	6.57363	6.51743	6.91647	6.46324	6.61124	6.13138	5.43841	6.32836	6.70264	6.53058	1.16364	1.23246	1.20083	0.218647	0.301546	0.264027	0.0466596	0.0498323	0.0319994	0.0499569
sp|Q9H9Q4-2|NHEJ1_HUMAN	NHEJ1	NHEJ1_HUMAN Isoform 2 of Non-homologous end-joining factor 1	2	5.23338	7.11362	5.37348	5.2196	7.25346	7.88205	8.16323	7.7379	6.49896	7.23949	7.87895	6.6272	3.72391	4.53453	5.9004	3.61986	5.73502	7.75916	7.06115	4.44468	1.35294	1.23123	0.775006	0.436102	0.300105	-0.367721	0.160713	0.0490511	0.0897537	0.236934
sp|Q9NZH8|IL36G_HUMAN	IL36G	IL36G_HUMAN Interleukin-36 gamma	1	5.49673	6.08303	5.47926	6.24704	3.41165	4.87055	5.96277	7.46164	4.25895	14.5229	5.46829	4.32575	6.47304	6.08252	5.53183	8.32404	5.82652	5.42665	7.14397	6.60286	0.931372	1.22611	1.13324	-0.102571	0.294093	0.180457	0.0680761	0.315574	0.692961	0.183356
sp|Q5T8P6-3|RBM26_HUMAN	RBM26	RBM26_HUMAN Isoform 3 of RNA-binding protein 26	1	5.51489	5.0814	6.64241	4.78929	6.20851	7.20274	7.00458	5.69947	6.61771	5.77541	7.25792	7.30389	6.16877	6.95417	4.94853	6.83031	5.507	6.52882	6.73873	6.22544	1.18555	1.22367	1.13046	0.245557	0.291211	0.176911	0.147725	0.107251	0.106031	0.147531
sp|Q8IX15|HOMEZ_HUMAN	HOMEZ	HOMEZ_HUMAN Homeobox and leucine zipper protein Homez	1	7.01316	6.27674	4.99608	5.42582	6.39184	7.56105	6.25608	7.05818	8.19374	7.37563	7.42395	6.02018	4.74851	5.61042	5.24732	4.40129	5.92795	6.81679	7.25337	5.00189	1.14994	1.22359	0.84378	0.201559	0.291119	-0.245061	0.151506	0.0891183	0.124567	0.10676
sp|O43240|KLK10_HUMAN	KLK10	KLK10_HUMAN Kallikrein-10	1	5.34132	4.65989	5.74533	6.52339	4.46967	4.69235	5.89259	6.14749	5.35199	11.835	5.10873	4.94443	8.45767	5.92395	6.87593	8.03027	5.56748	5.30053	6.81004	7.32196	0.952051	1.22318	1.31513	-0.0708899	0.290638	0.395204	0.13991	0.158897	0.492531	0.156614
sp|Q9NYG5|APC11_HUMAN	ANAPC11	APC11_HUMAN Anaphase-promoting complex subunit 11	1	5.82418	4.08294	4.37318	6.24808	6.10832	6.04006	5.66475	6.27124	7.38775	6.97383	5.5159	5.20057	9.11694	6.01305	6.94132	8.23789	5.13209	6.02109	6.26951	7.5773	1.17322	1.22163	1.47645	0.230477	0.288805	0.562136	0.207469	0.0426159	0.171222	0.181244
sp|Q14332|FZD2_HUMAN	FZD2	FZD2_HUMAN Frizzled-2	1	4.93938	6.87413	4.37471	5.53307	6.04164	6.94742	7.95085	6.35288	7.01552	6.9202	6.91248	5.65181	6.54719	7.06465	4.85818	6.01589	5.43032	6.8232	6.625	6.12148	1.2565	1.22	1.12728	0.32941	0.286883	0.172842	0.197494	0.123175	0.0981864	0.15434
sp|Q2T9J0|TYSD1_HUMAN	TYSND1	TYSD1_HUMAN Peroxisomal leader peptide-processing protease	1	6.37967	4.54043	6.18699	6.33408	5.39223	5.50122	7.08098	7.03414	6.31784	10.1396	6.57473	5.55597	6.43069	5.94222	5.22708	5.36213	5.86029	6.25214	7.14703	5.74053	1.06687	1.21957	0.979564	0.093378	0.286372	-0.0297887	0.150802	0.148953	0.28563	0.0966675
sp|Q9H992|MARH7_HUMAN	2021-03-07	MARH7_HUMAN E3 ubiquitin-protein ligase MARCH7	1	5.34496	4.90135	6.70242	6.88859	5.37133	5.75436	7.12338	7.00862	6.834	8.78533	7.03839	6.36535	5.00338	6.57701	5.71004	4.5915	5.95933	6.31442	7.25577	5.47048	1.05959	1.21755	0.917969	0.0835007	0.283978	-0.123482	0.165338	0.139849	0.145803	0.159101
sp|Q9NZI5|GRHL1_HUMAN	GRHL1	GRHL1_HUMAN Grainyhead-like protein 1 homolog	1	6.13976	6.47532	5.32359	4.01156	6.83872	6.24903	5.92332	6.86355	6.24323	6.22142	7.62884	6.60272	5.91905	5.66979	7.73265	6.15745	5.48756	6.46866	6.67405	6.36974	1.17879	1.21622	1.16076	0.237302	0.282399	0.215069	0.199803	0.07132	0.0989053	0.146029
sp|Q13469|NFAC2_HUMAN	NFATC2	NFAC2_HUMAN Nuclear factor of activated T-cells, cytoplasmic 2	1	5.24012	6.87987	5.84928	5.03413	8.69599	5.37514	6.71792	5.96331	5.98619	9.09311	6.3779	6.43823	5.02052	5.19872	5.09056	7.03901	5.75085	6.68809	6.97386	5.5872	1.16297	1.21267	0.971544	0.217819	0.278182	-0.0416491	0.144054	0.216359	0.204618	0.173726
sp|Q9UH17|ABC3B_HUMAN	APOBEC3B	ABC3B_HUMAN DNA dC->dU-editing enzyme APOBEC-3B	1	6.03363	5.63667	4.86359	5.91939	6.83796	6.63518	5.99036	5.63907	6.02447	7.22718	8.07047	5.88591	5.62112	6.56025	5.20751	7.84725	5.61332	6.27564	6.80201	6.30903	1.11799	1.21176	1.12394	0.160909	0.277106	0.168564	0.0938721	0.0888193	0.152631	0.185654
tr|E9PF99|E9PF99_HUMAN	CEP192	E9PF99_HUMAN Centrosomal protein of 192 kDa	9	5.59192	6.60019	5.40764	5.47532	6.67532	8.6277	7.36551	6.87328	6.77419	7.73482	7.09092	6.35272	4.37776	5.5426	5.03905	4.47106	5.76877	7.38545	6.98816	4.85762	1.28025	1.21138	0.842055	0.356423	0.27665	-0.248014	0.0969848	0.118819	0.0833433	0.11161
sp|Q9BTP7|FAP24_HUMAN	FAAP24	FAP24_HUMAN Fanconi anemia-associated protein of 24 kDa	1	5.76256	6.33953	4.00478	5.80077	8.03321	7.70073	6.73851	6.20401	7.40575	6.30854	5.77636	7.03516	5.50588	5.89105	6.31098	5.1822	5.47691	7.16912	6.63145	5.72253	1.30897	1.2108	1.04485	0.388433	0.275963	0.0632903	0.185536	0.117978	0.110056	0.0852253
sp|Q99543-2|DNJC2_HUMAN	DNAJC2	DNJC2_HUMAN Isoform 2 of DnaJ homolog subfamily C member 2	1	5.90265	5.25456	5.37425	5.60758	6.32716	6.46578	5.63672	6.20043	7.14118	5.37409	7.06388	7.20474	7.09875	6.3155	7.05417	5.97853	5.53476	6.15752	6.69597	6.61174	1.11252	1.2098	1.19458	0.153829	0.274773	0.256509	0.0516243	0.0590691	0.131891	0.0838308
sp|Q9HB58-6|SP110_HUMAN	SP110	SP110_HUMAN Isoform 6 of Sp110 nuclear body protein	1	5.99046	6.31863	3.85413	5.12714	6.32624	7.23157	7.87098	8.03028	7.38492	6.39635	5.84241	6.09202	6.10652	6.56013	6.29937	4.56885	5.32259	7.36477	6.42892	5.88372	1.38368	1.20786	1.10542	0.468512	0.272449	0.1446	0.206744	0.105043	0.10521	0.152296
sp|Q96JW4|S41A2_HUMAN	SLC41A2	S41A2_HUMAN Solute carrier family 41 member 2	3	5.94749	6.24564	5.358	5.91722	6.58409	6.68184	6.61088	5.86968	6.81266	7.62406	7.11636	6.76916	5.66358	6.07003	5.59021	5.13909	5.86709	6.43662	7.08056	5.61573	1.09707	1.20683	0.957158	0.133659	0.271219	-0.0631716	0.0631212	0.059069	0.0556278	0.0679255
sp|Q969Q5|RAB24_HUMAN	RAB24	RAB24_HUMAN Ras-related protein Rab-24	4	5.70205	5.64042	5.99498	6.00606	5.09995	5.18055	5.8431	6.68688	5.5394	10.7734	5.68457	6.14511	6.1681	5.82855	6.06742	7.63945	5.83588	5.70262	7.03562	6.42588	0.977166	1.20558	1.1011	-0.0333247	0.269728	0.138944	0.0328697	0.129031	0.356073	0.12784
sp|Q15572|TAF1C_HUMAN	TAF1C	TAF1C_HUMAN TATA box-binding protein-associated factor RNA polymerase I subunit C	1	5.79181	6.49984	5.70994	5.40056	6.82347	7.15228	5.72651	5.87106	7.51253	5.7707	6.39616	8.5161	7.65368	5.15326	4.51669	5.50539	5.85054	6.39333	7.04887	5.70725	1.09278	1.20482	0.97551	0.127998	0.268823	-0.0357721	0.079395	0.109803	0.172345	0.238398
sp|Q92686|NEUG_HUMAN	NRGN	NEUG_HUMAN Neurogranin	1	5.89254	6.40013	5.87455	5.27509	6.9946	8.32695	7.91862	7.3601	7.06684	7.59226	7.51502	6.05558	3.78955	5.49834	4.72409	3.71574	5.86058	7.65007	7.05742	4.43193	1.30534	1.20422	0.756228	0.38443	0.268099	-0.403108	0.0785109	0.0771128	0.100167	0.190933
sp|P04818|TYSY_HUMAN	TYMS	TYSY_HUMAN Thymidylate synthase	15	5.51499	6.55009	5.30272	5.51749	6.62304	7.89138	6.8353	6.61256	7.09066	7.26725	6.92869	6.25949	5.36538	5.49003	5.79299	4.95794	5.72132	6.99057	6.88652	5.40158	1.22185	1.20366	0.944115	0.289061	0.267427	-0.0829659	0.0981602	0.0871524	0.0639354	0.0640556
sp|Q8NB46|ANR52_HUMAN	ANKRD52	ANR52_HUMAN Serine/threonine-protein phosphatase 6 regulatory ankyrin repeat subunit C	2	5.86077	6.49502	4.62583	5.40556	7.54672	6.80933	7.93244	6.60492	6.26552	7.2489	6.7948	6.60452	6.29835	5.39163	4.62772	5.48796	5.5968	7.22335	6.72844	5.45142	1.29062	1.20219	0.974024	0.368068	0.26567	-0.0379702	0.14053	0.0861316	0.0609737	0.125343
sp|Q9H6A9|PCX3_HUMAN	PCNXL3	PCX3_HUMAN Pecanex-like protein 3	4	5.95818	5.84855	5.86871	6.37219	5.66215	5.76395	6.16202	6.23251	6.37604	10.222	6.14034	6.16467	5.47008	5.87862	5.83275	6.04732	6.01191	5.95516	7.22576	5.80719	0.99056	1.20191	0.965948	-0.0136831	0.265327	-0.049982	0.0407305	0.0477057	0.276828	0.0418345
sp|Q9UHK0|NUFP1_HUMAN	NUFIP1	NUFP1_HUMAN Nuclear fragile X mental retardation-interacting protein 1	1	5.65209	5.54627	5.51611	5.8914	6.37234	6.75566	6.51422	5.55379	6.00997	6.90575	7.51688	6.72471	6.9197	6.13426	5.51546	6.47139	5.65147	6.299	6.78933	6.2602	1.11458	1.20134	1.10771	0.156498	0.264643	0.147584	0.0301251	0.0827751	0.0913697	0.0945048
sp|Q9Y575-3|ASB3_HUMAN	ASB3	ASB3_HUMAN Isoform 3 of Ankyrin repeat and SOCS box protein 3	1	5.40133	5.66629	6.51467	5.58355	6.13936	7.27926	6.50533	6.20722	6.65022	7.73747	6.73277	6.66876	6.41186	5.52292	5.91232	5.06667	5.79146	6.53279	6.94731	5.72844	1.128	1.19958	0.989119	0.173773	0.262526	-0.0157842	0.0854156	0.0799682	0.0759953	0.0998272
sp|Q8TDP1|RNH2C_HUMAN	RNASEH2C	RNH2C_HUMAN Ribonuclease H2 subunit C	3	5.77878	6.2416	5.15028	5.56834	6.77465	6.65082	5.8684	6.47758	6.7275	6.65826	6.78024	7.10219	6.30594	5.77206	6.46173	5.68164	5.68475	6.44286	6.81705	6.05534	1.13336	1.19918	1.06519	0.180605	0.26205	0.0911117	0.0798489	0.0623772	0.0288318	0.063807
sp|Q9H7T9-2|AUNIP_HUMAN	AUNIP	AUNIP_HUMAN Isoform 2 of Aurora kinase A and ninein-interacting protein	1	6.23963	6.51828	5.23312	5.28163	6.50236	6.01519	6.75305	5.96839	6.60765	8.29171	6.49601	6.44961	5.95403	5.81107	5.40678	6.47149	5.81816	6.30975	6.96124	5.91084	1.08449	1.19647	1.01593	0.117018	0.258781	0.0227996	0.113053	0.0604813	0.127772	0.0744026
sp|O95476|CNEP1_HUMAN	CTDNEP1	CNEP1_HUMAN CTD nuclear envelope phosphatase 1	2	4.83378	6.38467	5.30366	6.24984	6.71245	7.31148	6.56196	5.64051	6.64226	7.2371	6.58069	6.77997	6.24655	6.11482	5.80828	5.59198	5.69299	6.5566	6.81	5.94041	1.1517	1.19621	1.04346	0.203762	0.25847	0.061376	0.131382	0.105425	0.0435636	0.0498429
sp|Q15828|CYTM_HUMAN	CST6	CYTM_HUMAN Cystatin-M	4	5.4504	5.45078	6.2191	6.89416	4.81225	4.74242	6.95255	5.94919	4.60058	13.3237	5.63961	5.16141	5.48448	6.08083	6.22791	7.01065	6.00361	5.6141	7.18133	6.20097	0.935121	1.19617	1.03287	-0.0967749	0.25842	0.0466631	0.115848	0.187001	0.573275	0.101315
sp|Q14166|TTL12_HUMAN	TTLL12	TTL12_HUMAN Tubulin--tyrosine ligase-like protein 12	45	5.44436	6.36803	5.42526	5.77703	6.92451	7.34487	6.6135	6.57169	7.10078	6.936	6.81536	6.65138	5.80278	5.41149	5.74964	5.06332	5.75367	6.86364	6.87588	5.50681	1.19292	1.19504	0.957095	0.254492	0.257062	-0.0632663	0.0765196	0.0520639	0.0276274	0.0622324
sp|P04350|TBB4A_HUMAN	TUBB4A	TBB4A_HUMAN Tubulin beta-4A chain	3	5.52631	6.35961	5.27297	5.78327	6.77734	7.03006	6.18869	6.40799	6.81478	6.62187	6.34874	7.62842	6.22069	6.08901	5.94622	4.98406	5.73554	6.60102	6.85345	5.80999	1.1509	1.19491	1.01298	0.20276	0.256902	0.0186076	0.0811243	0.0568475	0.0803812	0.0967152
sp|Q14353|GAMT_HUMAN	GAMT	GAMT_HUMAN Guanidinoacetate N-methyltransferase	13	5.63346	6.36947	5.21329	5.50192	6.62973	7.39074	6.61386	6.76913	7.07824	7.44152	6.52259	6.07342	5.48735	5.87979	5.84281	5.55269	5.67953	6.85086	6.77894	5.69066	1.20624	1.19357	1.00196	0.270513	0.255287	0.00282317	0.0866788	0.0535135	0.0890025	0.0350412
sp|Q15398-3|DLGP5_HUMAN	DLGAP5	DLGP5_HUMAN Isoform 3 of Disks large-associated protein 5	1	4.89497	7.32301	5.6334	5.77286	6.23737	5.39433	6.42725	5.51117	5.74336	6.01974	11.194	5.22617	5.32967	5.92546	6.99619	6.37103	5.90606	5.89253	7.04582	6.15559	0.997709	1.19298	1.04225	-0.00330881	0.254571	0.0597005	0.17273	0.0875526	0.395262	0.114417
sp|Q14012|KCC1A_HUMAN	CAMK1	KCC1A_HUMAN Calcium/calmodulin-dependent protein kinase type 1	3	5.54805	5.65182	5.64354	5.8265	6.19602	6.76929	6.78015	6.21732	7.21806	6.81672	6.61639	6.35517	5.47044	6.81417	6.03136	6.04501	5.66748	6.49069	6.75159	6.09025	1.14525	1.19129	1.0746	0.195666	0.252519	0.103794	0.020468	0.0505507	0.0538981	0.0906183
sp|Q9BPW8|NIPS1_HUMAN	NIPSNAP1	NIPS1_HUMAN Protein NipSnap homolog 1	18	5.46275	6.37475	5.40081	6.10898	6.83679	7.30431	6.86886	6.97739	6.90832	6.87301	7.00148	7.02112	5.41709	5.05033	5.36178	5.03225	5.83682	6.99684	6.95098	5.21536	1.19874	1.19088	0.893528	0.26152	0.252034	-0.162416	0.0823716	0.0305321	0.0102971	0.0388085
sp|P19784|CSK22_HUMAN	CSNK2A2	CSK22_HUMAN Casein kinase II subunit alpha'	14	5.61637	6.32453	5.25943	5.49605	6.54924	6.90537	5.88069	6.12583	6.98984	6.95725	6.31936	6.75722	6.6792	6.21333	6.16722	5.75906	5.6741	6.36528	6.75592	6.2047	1.12181	1.19066	1.09351	0.165834	0.251761	0.128972	0.080766	0.0712872	0.0456894	0.0606775
sp|Q56NI9|ESCO2_HUMAN	ESCO2	ESCO2_HUMAN N-acetyltransferase ESCO2	1	5.06881	5.26795	6.96926	5.83891	6.79515	5.60698	6.11775	6.0941	7.2257	7.05997	6.63626	6.63293	7.25765	6.17565	6.16294	5.08999	5.78623	6.1535	6.88871	6.17156	1.06347	1.19054	1.06659	0.0887818	0.251611	0.0930103	0.147514	0.0793474	0.0437142	0.143394
sp|Q13214|SEM3B_HUMAN	SEMA3B	SEM3B_HUMAN Semaphorin-3B	1	6.02404	6.30218	5.3989	5.01121	6.74127	7.11202	6.35731	6.05686	6.76097	6.67439	6.26256	7.32929	6.62083	6.01644	6.4776	4.85412	5.68408	6.56686	6.7568	5.99225	1.15531	1.18872	1.05422	0.208277	0.249413	0.0761697	0.103171	0.0698735	0.0650088	0.133735
sp|O95685|PPR3D_HUMAN	PPP1R3D	PPR3D_HUMAN Protein phosphatase 1 regulatory subunit 3D	1	5.89804	6.31536	5.07111	5.85158	6.67201	7.30334	7.05692	7.52659	6.23165	7.69731	7.74194	5.82006	4.96407	5.3739	5.28194	5.19417	5.78402	7.13971	6.87274	5.20352	1.23439	1.18823	0.899637	0.303793	0.248812	-0.152585	0.0897324	0.0512741	0.144396	0.033764
sp|P21802-11|FGFR2_HUMAN	FGFR2	FGFR2_HUMAN Isoform 11 of Fibroblast growth factor receptor 2	2	5.76262	5.71952	5.8118	5.79362	7.21488	6.77448	6.25992	6.36106	6.61825	6.41825	6.55984	7.82927	5.66099	5.39375	6.51113	5.31061	5.77189	6.65259	6.8564	5.71912	1.15258	1.1879	0.990857	0.204871	0.248408	-0.0132506	0.00699735	0.0655338	0.0953841	0.0959514
sp|Q6P1Q9|MET2B_HUMAN	METTL2B	MET2B_HUMAN Methyltransferase-like protein 2B	1	5.94626	5.27354	5.7084	5.86577	6.28676	7.21621	6.60481	6.52651	7.00843	6.39253	6.41163	7.25968	6.47974	5.8053	5.58933	5.62513	5.69849	6.65857	6.76807	5.87487	1.16848	1.18769	1.03095	0.224633	0.248164	0.0439778	0.0526507	0.0594145	0.0642644	0.0704986
sp|P14618|KPYM_HUMAN	PKM	KPYM_HUMAN Pyruvate kinase PKM	58	5.57167	6.17529	5.38386	5.7555	6.58126	7.29801	6.51077	6.81483	6.96069	6.91398	6.91799	6.35088	5.72053	5.78811	5.89423	5.36241	5.72158	6.80122	6.78588	5.69132	1.1887	1.18602	0.994711	0.249379	0.246123	-0.0076503	0.0591434	0.0523106	0.0428496	0.0405238
sp|P0CG13|CTF8_HUMAN	CHTF8	CTF8_HUMAN Chromosome transmission fidelity protein 8 homolog	4	5.63738	5.81049	5.75273	5.89672	6.71416	7.21556	6.5135	6.38202	7.29253	6.82696	6.54566	6.72859	5.8532	5.7898	5.7599	5.2808	5.77433	6.70631	6.84843	5.67093	1.1614	1.18601	0.982092	0.215866	0.246121	-0.0260695	0.0188411	0.0545666	0.0464604	0.0463727
sp|O60512|B4GT3_HUMAN	B4GALT3	B4GT3_HUMAN Beta-1,4-galactosyltransferase 3	1	6.17575	6.86741	4.99264	5.86828	4.76968	7.48448	5.94929	5.5764	6.96562	7.22774	7.11362	7.03991	5.85855	5.7166	6.4008	5.99322	5.97602	5.94496	7.08672	5.99229	0.994803	1.18586	1.00272	-0.00751727	0.245934	0.00392307	0.130089	0.191475	0.0157694	0.0492014
sp|P55040|GEM_HUMAN	GEM	GEM_HUMAN GTP-binding protein GEM	2	5.80595	5.3896	6.5113	5.53012	6.21727	6.55014	5.06047	6.21028	6.27737	6.38509	6.53633	8.35566	6.16558	6.67136	6.07355	6.25993	5.80924	6.00954	6.88861	6.29261	1.03448	1.1858	1.08321	0.0489045	0.245863	0.115307	0.085892	0.108542	0.142813	0.0419094
sp|P0C2W1|FBSP1_HUMAN	FBXO45	FBSP1_HUMAN F-box/SPRY domain-containing protein 1	3	5.67557	6.76659	5.89037	5.3767	7.30308	6.54894	5.28555	5.635	6.57252	6.40486	6.57726	8.55826	6.02613	6.14673	5.49972	5.73269	5.92731	6.19314	7.02822	5.85132	1.04485	1.18574	0.98718	0.0632947	0.245783	-0.0186154	0.100865	0.147217	0.14558	0.0498769
sp|Q96MG8|PCMD1_HUMAN	PCMTD1	PCMD1_HUMAN Protein-L-isoaspartate O-methyltransferase domain-containing protein 1	1	5.26309	5.53812	6.04546	5.39125	5.82883	6.48869	5.66862	7.39497	6.77337	5.60925	7.011	6.9683	6.3443	6.93928	6.58212	6.15334	5.55948	6.34528	6.59048	6.50476	1.14134	1.18545	1.17003	0.190733	0.245434	0.226546	0.0616819	0.123658	0.10049	0.0520607
sp|A2RU49|HYKK_HUMAN	HYKK	HYKK_HUMAN Hydroxylysine kinase	1	6.42543	5.27003	6.65389	5.6814	5.77638	6.87211	6.57266	6.37268	6.01804	6.78404	8.07958	7.60257	5.04713	6.01666	5.5829	5.2445	6.00769	6.39846	7.12106	5.4728	1.06504	1.18532	0.910966	0.0909144	0.245282	-0.134531	0.107131	0.0723179	0.127701	0.07761
sp|Q9UPM9|B9D1_HUMAN	B9D1	B9D1_HUMAN B9 domain-containing protein 1	2	6.47871	6.17114	5.24447	5.88121	6.23638	6.45669	6.20498	6.76923	7.22125	6.82424	7.20997	6.88916	5.73436	6.31649	5.69347	4.66822	5.94388	6.41682	7.03615	5.60313	1.07957	1.18376	0.942673	0.110453	0.243382	-0.0851713	0.0885351	0.0405602	0.0296974	0.122281
sp|Q9Y4G2|PKHM1_HUMAN	PLEKHM1	PKHM1_HUMAN Pleckstrin homology domain-containing family M member 1	1	5.04975	5.95604	7.10904	5.83802	5.63467	7.30086	6.83223	7.13995	6.72949	6.86562	7.88063	6.87601	5.35489	5.73869	3.57632	6.11778	5.98821	6.72693	7.08794	5.19692	1.12336	1.18365	0.867858	0.167822	0.24324	-0.204469	0.141718	0.112039	0.0751504	0.216358
sp|Q9UJJ7|RUSD1_HUMAN	RPUSD1	RUSD1_HUMAN RNA pseudouridylate synthase domain-containing protein 1	3	5.49348	6.44629	5.15271	5.81958	6.32472	7.14098	6.14313	6.89982	7.02549	6.65722	6.72958	6.70664	6.48827	5.84907	5.45199	5.67104	5.72801	6.62716	6.77973	5.86509	1.15697	1.18361	1.02393	0.210356	0.243193	0.0341186	0.0961666	0.0709956	0.0245728	0.0760539
sp|Q9ULX6|AKP8L_HUMAN	AKAP8L	AKP8L_HUMAN A-kinase anchor protein 8-like	14	5.49719	6.37048	5.8262	5.97677	6.2235	6.93977	6.25684	6.2894	6.27731	8.72178	6.48716	6.52619	5.75145	5.96728	5.57042	5.31826	5.91766	6.42738	7.00311	5.65185	1.08613	1.18343	0.955082	0.119203	0.242969	-0.066303	0.061217	0.0533115	0.164353	0.0487053
tr|H7BZ26|H7BZ26_HUMAN	SSFA2	H7BZ26_HUMAN Sperm-specific antigen 2 (Fragment)	1	6.92993	5.26333	4.65804	5.73259	6.0067	6.5447	6.09858	6.79974	7.14506	6.2898	5.6178	7.6719	6.73733	6.91255	5.87467	5.71727	5.64597	6.36243	6.68114	6.31045	1.1269	1.18335	1.11769	0.172356	0.242872	0.160522	0.170453	0.0588522	0.136105	0.0953668
sp|Q9Y5L0-1|TNPO3_HUMAN	TNPO3	TNPO3_HUMAN Isoform 1 of Transportin-3	22	5.35216	6.1684	5.48327	5.8489	6.61281	7.67588	6.74152	6.88999	6.71917	7.07787	6.87326	6.3721	5.63157	5.74076	5.48418	5.32815	5.71318	6.98005	6.7606	5.54617	1.22174	1.18333	0.970766	0.288943	0.242857	-0.0428041	0.0646156	0.0684109	0.0440449	0.0323435
sp|O00142|KITM_HUMAN	TK2	KITM_HUMAN Thymidine kinase 2, mitochondrial	3	5.46779	6.245	5.71275	5.77517	6.35308	7.77908	7.27008	6.80186	6.73003	7.1501	7.21071	6.34697	4.99375	5.9321	5.39937	4.83215	5.80018	7.05102	6.85945	5.28934	1.21566	1.18263	0.911928	0.281736	0.241996	-0.133009	0.05601	0.0869359	0.0587522	0.0927254
sp|Q9UI43|RRMJ2_HUMAN	FTSJ2	RRMJ2_HUMAN Putative ribosomal RNA methyltransferase 2	1	6.53088	4.92142	5.69775	6.26082	5.34772	5.5498	6.25838	5.20967	7.00286	6.75139	6.77187	7.14962	6.57608	6.51584	6.70083	6.75507	5.85272	5.59139	6.91893	6.63695	0.95535	1.18217	1.134	-0.065899	0.241443	0.181415	0.121531	0.0833566	0.0276703	0.016598
sp|A6NJ78|MET15_HUMAN	METTL15	MET15_HUMAN Probable methyltransferase-like protein 15	12	5.47987	6.37854	5.52906	5.75975	6.64199	7.577	6.29632	6.72473	6.92049	7.21742	6.76581	6.45658	5.73457	5.50713	5.583	5.42773	5.78681	6.81001	6.84007	5.56311	1.17682	1.18201	0.961344	0.23489	0.241245	-0.056876	0.0713565	0.0798755	0.0463424	0.0234959
sp|O95294-3|RASL1_HUMAN	RASAL1	RASL1_HUMAN Isoform 3 of RasGAP-activating-like protein 1	5	5.36371	5.98559	5.7421	6.41004	5.773	6.08166	5.96301	6.28573	7.17388	7.90052	6.71154	5.97915	6.97883	5.90153	5.47472	6.27498	5.87536	6.02585	6.94127	6.15752	1.02561	1.18142	1.04802	0.0364875	0.240523	0.067671	0.074681	0.0356615	0.116231	0.103569
sp|Q3SXY8|AR13B_HUMAN	ARL13B	AR13B_HUMAN ADP-ribosylation factor-like protein 13B	1	5.19469	6.27413	6.03168	5.7937	6.72194	6.73944	6.79495	6.16738	6.86796	6.61793	6.82595	7.19132	4.74578	5.9171	6.18993	5.92611	5.82355	6.60593	6.87579	5.69473	1.13435	1.18069	0.977879	0.181862	0.239627	-0.0322714	0.0794794	0.044508	0.0344779	0.113292
sp|Q9UBX3-2|DIC_HUMAN	SLC25A10	DIC_HUMAN Isoform 2 of Mitochondrial dicarboxylate carrier	10	5.65795	6.67661	5.22948	5.51525	6.87351	7.55458	6.23662	6.53627	6.95675	7.09936	6.6635	6.51669	5.7355	5.72988	5.79641	5.22164	5.76982	6.80025	6.80907	5.62086	1.17859	1.18012	0.974182	0.23706	0.238932	-0.0377367	0.109228	0.0832616	0.0391102	0.0476519
sp|Q15287|RNPS1_HUMAN	RNPS1	RNPS1_HUMAN RNA-binding protein with serine-rich domain 1	1	4.32958	5.38803	5.1056	8.38484	7.86875	6.07833	4.76375	6.90656	5.95224	6.38547	7.12407	7.92606	6.90121	6.24055	5.97034	4.67462	5.80201	6.40435	6.84696	5.94668	1.10381	1.1801	1.02493	0.142498	0.23891	0.035531	0.306632	0.205465	0.126616	0.157036
sp|Q5XUX1|FBXW9_HUMAN	FBXW9	FBXW9_HUMAN F-box/WD repeat-containing protein 9	1	6.95169	5.2577	5.78373	4.62151	6.88734	8.26588	5.74911	5.88408	7.97199	6.36874	6.32811	5.99931	6.35205	6.10735	5.76967	5.70174	5.65366	6.6966	6.66704	5.9827	1.18447	1.17924	1.0582	0.244245	0.237861	0.0816128	0.174619	0.173654	0.132826	0.0507241
sp|Q9HBH5|RDH14_HUMAN	RDH14	RDH14_HUMAN Retinol dehydrogenase 14	10	5.57456	6.42185	5.50434	5.4305	6.92716	7.26354	6.36491	6.54207	6.95613	6.86327	6.85506	6.36179	6.42993	5.49834	5.91793	5.08863	5.73281	6.77442	6.75906	5.73371	1.18169	1.17901	1.00016	0.240854	0.23758	0.000225214	0.0807821	0.0593066	0.0397666	0.100199
sp|Q9NPB8|GPCP1_HUMAN	GPCPD1	GPCP1_HUMAN Glycerophosphocholine phosphodiesterase GPCPD1	12	5.53873	6.23517	5.4297	5.83348	6.88109	7.30514	6.41235	6.56731	7.27214	6.80655	6.62773	6.45382	6.09507	5.74631	5.6204	5.17502	5.75927	6.79147	6.79006	5.6592	1.17922	1.17898	0.982625	0.237838	0.237538	-0.0252878	0.0625435	0.0580239	0.0518662	0.0671711
sp|P54760|EPHB4_HUMAN	EPHB4	EPHB4_HUMAN Ephrin type-B receptor 4	11	5.75828	5.77491	5.43931	5.48127	6.42233	6.65667	5.97178	5.95219	6.97473	6.4428	6.3371	6.71506	6.85691	6.34294	6.66128	6.21245	5.61344	6.25074	6.61742	6.51839	1.11353	1.17885	1.16121	0.155142	0.237384	0.215631	0.0316744	0.0555093	0.0432973	0.0451107
sp|Q96CC6|RHDF1_HUMAN	RHBDF1	RHDF1_HUMAN Inactive rhomboid protein 1	1	6.26184	6.14416	4.65696	6.04791	6.16489	6.64141	5.78379	5.76814	7.72925	5.65044	7.79668	6.06361	6.60889	6.16603	5.78273	6.73328	5.77772	6.08956	6.80999	6.32273	1.05397	1.17867	1.09433	0.0758377	0.237154	0.130049	0.130203	0.0675096	0.163523	0.0687338
sp|P63096|GNAI1_HUMAN	GNAI1	GNAI1_HUMAN Guanine nucleotide-binding protein G(i) subunit alpha-1	3	5.17743	6.0571	5.89618	5.49126	7.51092	6.65159	6.62965	6.13192	6.42565	6.74844	6.84449	6.63616	6.42551	5.62017	6.05316	5.70038	5.65549	6.73102	6.66369	5.94981	1.19017	1.17827	1.05204	0.251172	0.236668	0.0731897	0.0703387	0.0850748	0.0270249	0.0619707
sp|Q9GZN7|ROGDI_HUMAN	ROGDI	ROGDI_HUMAN Protein rogdi homolog	1	5.56672	5.38281	5.20329	7.45126	6.83092	5.93841	5.69879	6.26694	5.23809	6.80778	8.07349	7.69017	4.2179	6.72561	5.86794	7.03988	5.90102	6.18376	6.95238	5.96283	1.04791	1.17817	1.01047	0.0675211	0.236543	0.0150335	0.176934	0.0792853	0.181197	0.212037
sp|P22415|USF1_HUMAN	USF1	USF1_HUMAN Upstream stimulatory factor 1	1	6.28207	5.13885	5.93697	5.50242	6.14209	5.67057	5.63119	6.42449	6.03098	7.64093	6.30179	6.9477	7.14892	5.6213	7.03695	6.54276	5.71508	5.96708	6.73035	6.58748	1.0441	1.17765	1.15265	0.0622533	0.235908	0.204954	0.0873699	0.0642238	0.106771	0.105637
sp|Q9BUB7|TMM70_HUMAN	TMEM70	TMM70_HUMAN Transmembrane protein 70, mitochondrial	11	5.48716	6.35961	5.55881	5.47498	6.93682	7.44828	6.19886	6.54542	6.97404	7.07496	6.70986	6.18145	5.77437	6.03878	5.88519	5.35141	5.72014	6.78234	6.73508	5.76244	1.1857	1.17743	1.00739	0.245734	0.235644	0.0106287	0.0748084	0.0791218	0.0593759	0.0511391
sp|Q14571|ITPR2_HUMAN	ITPR2	ITPR2_HUMAN Inositol 1,4,5-trisphosphate receptor type 2	2	5.5593	6.0136	5.94351	5.994	5.97981	7.06483	5.76601	5.6851	6.94258	6.97159	6.65809	7.09694	6.10494	5.95679	6.36802	5.89489	5.8776	6.12394	6.9173	6.08116	1.04191	1.17689	1.03463	0.0592318	0.234981	0.0491188	0.0364512	0.10442	0.0267929	0.0346265
sp|Q9H7Z7|PGES2_HUMAN	PTGES2	PGES2_HUMAN Prostaglandin E synthase 2	24	5.56863	6.28254	5.01475	5.81936	6.56035	6.87697	6.22138	6.42136	7.06256	6.48767	6.55197	6.57258	6.5481	5.97626	6.43674	5.59876	5.67132	6.52001	6.66869	6.13997	1.14965	1.17586	1.08263	0.201191	0.23372	0.114546	0.0931436	0.0422785	0.0397462	0.0712627
sp|Q15555|MARE2_HUMAN	MAPRE2	MARE2_HUMAN Microtubule-associated protein RP/EB family member 2	10	5.33282	6.42223	5.63033	6.04002	6.43052	7.3033	6.82183	6.46951	6.51483	7.41472	6.92427	6.67904	5.33891	5.66043	5.57514	5.4421	5.85635	6.75629	6.88321	5.50415	1.15367	1.17534	0.939859	0.206229	0.233081	-0.0894833	0.0812431	0.0599325	0.0569863	0.0258255
sp|Q9HAU4|SMUF2_HUMAN	SMURF2	SMUF2_HUMAN E3 ubiquitin-protein ligase SMURF2	7	5.32715	6.43734	5.74391	5.57425	6.98188	7.32468	6.24031	6.4542	6.78062	6.97805	6.58116	6.77211	6.14679	5.71253	5.57268	5.37236	5.77066	6.75027	6.77798	5.70109	1.16976	1.17456	0.987944	0.226208	0.232119	-0.0174992	0.0825303	0.0731422	0.0239124	0.0575845
sp|Q9H3H1|MOD5_HUMAN	TRIT1	MOD5_HUMAN tRNA dimethylallyltransferase, mitochondrial	15	5.50135	6.26148	5.38591	5.88112	6.5636	7.14515	6.74284	6.31583	6.97019	6.68141	6.63017	6.76022	6.01868	5.70551	6.03492	5.40163	5.75746	6.69186	6.7605	5.79019	1.16229	1.17421	1.00568	0.216972	0.231696	0.00817571	0.0689644	0.0521898	0.0221402	0.0518358
sp|Q9BUT1|BDH2_HUMAN	BDH2	BDH2_HUMAN 3-hydroxybutyrate dehydrogenase type 2	3	5.6745	6.50608	5.29043	6.30297	6.43736	7.07359	6.37227	6.28809	7.25787	7.34922	6.32127	6.98637	5.57332	5.50108	6.03935	5.02621	5.9435	6.54283	6.97868	5.53499	1.10084	1.17417	0.931269	0.138603	0.231643	-0.102731	0.0944096	0.0548813	0.0665708	0.074918
sp|P25815|S100P_HUMAN	S100P	S100P_HUMAN Protein S100-P	1	3.56228	7.75114	5.52771	6.17204	4.79085	6.63273	4.84367	7.45537	5.08789	6.98961	8.233	6.70666	8.66934	6.46178	4.21893	6.89699	5.75329	5.93065	6.75429	6.56176	1.03083	1.17399	1.14052	0.0438036	0.231416	0.189695	0.301358	0.224082	0.19154	0.278978
sp|Q9BYE7|PCGF6_HUMAN	PCGF6	PCGF6_HUMAN Polycomb group RING finger protein 6	6	5.86275	5.63412	5.48705	6.07321	6.27517	6.99548	6.6994	6.51391	7.0085	6.6003	6.85441	6.60426	6.37652	5.60152	5.86136	5.55203	5.76428	6.62099	6.76687	5.84786	1.14862	1.17393	1.0145	0.199906	0.231347	0.0207671	0.0446732	0.0459312	0.0295848	0.0645795
sp|Q17RN3|FA98C_HUMAN	FAM98C	FA98C_HUMAN Protein FAM98C	1	5.16718	5.29578	6.48875	5.12694	6.37781	6.76154	6.30386	5.796	7.07546	5.55468	6.55159	6.72747	7.58556	6.2826	6.22095	6.68383	5.51966	6.3098	6.4773	6.69323	1.14315	1.1735	1.21262	0.193015	0.230813	0.278124	0.117771	0.0629109	0.100731	0.0940184
sp|P01116-2|RASK_HUMAN	KRAS	RASK_HUMAN Isoform 2B of GTPase KRas	1	5.63563	4.42481	6.45444	7.44541	5.90565	6.06411	6.27353	6.14404	7.31528	7.59062	6.66279	6.54221	6.22233	6.02533	5.43425	5.85959	5.99007	6.09683	7.02773	5.88537	1.01782	1.17323	0.982521	0.0254864	0.230484	-0.0254391	0.213559	0.0252455	0.0720161	0.056974
sp|Q6IAN0|DRS7B_HUMAN	DHRS7B	DRS7B_HUMAN Dehydrogenase/reductase SDR family member 7B	4	5.6434	6.45789	5.30141	6.1644	6.17598	7.28103	6.65909	6.46591	6.77145	7.00063	6.77608	7.09284	5.68488	5.74796	5.84564	4.9314	5.89177	6.6455	6.91025	5.55247	1.12793	1.17286	0.94241	0.173676	0.230036	-0.0855726	0.0879224	0.0704082	0.0234498	0.0755151
sp|Q9UIF7|MUTYH_HUMAN	MUTYH	MUTYH_HUMAN A/G-specific adenine DNA glycosylase	2	5.73637	5.74242	5.87806	6.03086	6.25502	6.02345	5.90394	6.16879	6.21653	6.27848	7.81476	7.11983	6.17813	6.4429	6.16559	6.04487	5.84693	6.0878	6.8574	6.20787	1.0412	1.17282	1.06173	0.0582423	0.229983	0.0864202	0.0237695	0.02553	0.11078	0.0270317
sp|Q9H1A3|METL9_HUMAN	METTL9	METL9_HUMAN Methyltransferase-like protein 9	2	6.28208	6.34016	5.0718	5.61562	5.66941	6.98704	5.33784	6.3867	6.77498	6.5171	6.29799	7.74551	6.54723	6.56719	5.41078	6.44857	5.82742	6.09525	6.8339	6.24344	1.04596	1.17271	1.07139	0.0648287	0.229852	0.0994857	0.103221	0.121126	0.0933939	0.0892977
sp|Q96FZ2|HMCES_HUMAN	HMCES	HMCES_HUMAN Embryonic stem cell-specific 5-hydroxymethylcytosine-binding protein	14	5.56488	6.4686	5.2892	5.80148	6.68573	7.12999	6.30813	6.55376	7.20849	6.73414	6.50634	6.66582	6.17002	5.64306	6.04552	5.22485	5.78104	6.6694	6.7787	5.77086	1.15367	1.17257	0.99824	0.206228	0.229679	-0.0025421	0.0871667	0.0516725	0.0445525	0.0741437
sp|P50570-4|DYN2_HUMAN	DNM2	DYN2_HUMAN Isoform 4 of Dynamin-2	29	5.78511	6.53623	5.11759	5.55962	7.12798	7.27764	6.10328	6.34461	7.4538	6.76063	6.27776	6.47456	6.43002	5.69793	5.81366	5.2396	5.74964	6.71338	6.74169	5.7953	1.16762	1.17254	1.00794	0.223568	0.229639	0.011413	0.103168	0.0859353	0.0763123	0.0846211
sp|Q96EX3|WDR34_HUMAN	WDR34	WDR34_HUMAN WD repeat-containing protein 34	2	5.55118	6.73698	5.38111	5.92185	7.02349	6.35369	4.91063	5.38559	7.47081	6.31646	7.18843	6.66948	6.59612	6.4826	5.92242	6.08917	5.89778	5.91835	6.91129	6.27258	1.00349	1.17185	1.06355	0.00502301	0.228784	0.0888864	0.102293	0.160597	0.0748189	0.0508359
sp|O60701|UGDH_HUMAN	UGDH	UGDH_HUMAN UDP-glucose 6-dehydrogenase	35	5.79293	6.63943	4.85276	5.41606	7.12725	7.53188	6.17714	6.44591	7.30201	6.88229	6.27759	6.1394	6.38886	5.91548	5.9488	5.1622	5.6753	6.82054	6.65032	5.85384	1.2018	1.1718	1.03146	0.265192	0.228729	0.0446867	0.132138	0.0909486	0.0813695	0.086962
sp|Q2M296|MTHSD_HUMAN	MTHFSD	MTHSD_HUMAN Methenyltetrahydrofolate synthase domain-containing protein	2	6.16196	6.41389	4.78376	5.70245	6.38235	6.88584	5.81982	6.27599	7.09355	6.30699	6.59765	7.02553	6.54906	5.87063	6.11059	6.01994	5.76551	6.341	6.75593	6.13755	1.09982	1.17178	1.06453	0.137261	0.228705	0.0902146	0.124485	0.0690072	0.0549379	0.0475158
sp|Q9H063|MAF1_HUMAN	MAF1	MAF1_HUMAN Repressor of RNA polymerase III transcription MAF1 homolog	2	5.48478	6.41599	5.88778	4.68132	6.27706	7.55636	5.83933	6.88457	6.30818	6.92177	7.05	6.04602	6.23892	5.67838	6.72821	6.00132	5.61747	6.63933	6.58149	6.16171	1.18191	1.17161	1.09688	0.241118	0.228495	0.13341	0.130195	0.112454	0.0732224	0.071741
sp|P14222|PERF_HUMAN	PRF1	PERF_HUMAN Perforin-1	1	4.7399	7.41581	4.99995	5.36184	6.57077	8.04005	6.24823	6.67385	6.68536	5.86105	7.44157	6.39018	6.68431	5.48244	5.75022	5.65447	5.62937	6.88322	6.59454	5.89286	1.22273	1.17145	1.04681	0.29011	0.228297	0.0659932	0.216358	0.115097	0.100032	0.0914903
tr|J3KPV7|J3KPV7_HUMAN	MPST	J3KPV7_HUMAN 3-mercaptopyruvate sulfurtransferase	1	5.54588	6.85179	4.52644	4.98539	7.22936	6.64831	5.85701	6.18964	7.06068	6.42364	6.55994	5.62064	5.59985	7.11861	6.38688	7.39594	5.47738	6.48108	6.41623	6.62532	1.18325	1.17141	1.20958	0.24275	0.22824	0.274505	0.183783	0.091815	0.0930349	0.121552
sp|Q8NBA8|DTWD2_HUMAN	DTWD2	DTWD2_HUMAN DTW domain-containing protein 2	4	5.47666	5.64722	5.2534	6.32751	6.0195	7.88694	6.93708	6.91429	7.05257	6.2733	6.27928	6.97391	5.72312	5.84008	5.68467	5.71046	5.6762	6.93945	6.64477	5.73958	1.22255	1.17064	1.01117	0.289897	0.227293	0.016021	0.0816013	0.109894	0.0642153	0.0120013
sp|Q96BZ9-3|TBC20_HUMAN	TBC1D20	TBC20_HUMAN Isoform 3 of TBC1 domain family member 20	2	5.71466	5.94413	6.0265	5.91119	6.17893	7.3265	6.34205	5.63653	6.12214	6.85505	7.36299	7.26283	6.1316	6.34965	5.42959	5.40567	5.89912	6.371	6.90075	5.82913	1.07999	1.16979	0.988135	0.111021	0.226254	-0.0172198	0.0224085	0.110623	0.0816789	0.0829492
sp|P68371|TBB4B_HUMAN	TUBB4B	TBB4B_HUMAN Tubulin beta-4B chain	56	5.83879	7.0368	5.58453	4.73355	7.03072	7.09463	5.79972	6.23468	7.02002	6.88151	6.82779	6.40196	6.17896	5.96091	5.87155	5.5039	5.79842	6.53994	6.78282	5.87883	1.12788	1.16977	1.01387	0.173618	0.226226	0.0198698	0.164062	0.0962889	0.0392917	0.0478549
sp|P35219|CAH8_HUMAN	CA8	CAH8_HUMAN Carbonic anhydrase-related protein	1	5.97505	5.23151	6.08434	6.03156	5.46101	5.66858	6.41204	5.9528	7.39094	6.45027	6.15763	7.27529	5.67478	6.28653	7.23811	6.70954	5.83061	5.87361	6.81853	6.47724	1.00737	1.16944	1.1109	0.0105988	0.225813	0.151731	0.0689273	0.0700907	0.0891565	0.102144
sp|Q96LW4|PRIPO_HUMAN	PRIMPOL	PRIPO_HUMAN DNA-directed primase/polymerase protein	1	5.49618	5.83138	6.18085	5.72541	6.43605	5.99047	5.3231	5.49864	6.74582	6.2248	6.99639	7.18891	6.39671	6.9	6.62168	6.44362	5.80846	5.81207	6.78898	6.5905	1.00062	1.16881	1.13464	0.000896368	0.22504	0.182234	0.0490604	0.0865145	0.0615088	0.0345884
sp|Q86W34|AMZ2_HUMAN	AMZ2	AMZ2_HUMAN Archaemetzincin-2	8	5.38275	6.01595	5.74784	6.09684	6.42279	6.88409	6.1004	6.30656	6.6704	7.41517	6.58406	6.49042	6.09174	5.70868	6.35451	5.7278	5.81085	6.42846	6.79001	5.97068	1.10629	1.16851	1.02751	0.145725	0.224666	0.0391479	0.0554176	0.0516017	0.0623272	0.0520387
sp|Q6N069|NAA16_HUMAN	NAA16	NAA16_HUMAN N-alpha-acetyltransferase 16, NatA auxiliary subunit	13	5.69864	6.27514	5.34417	5.6826	6.96216	6.99614	6.29678	6.35847	7.08922	6.71963	6.58291	6.48169	6.15234	5.82737	6.04473	5.48801	5.75014	6.65339	6.71836	5.87811	1.15708	1.16838	1.02226	0.210493	0.224513	0.0317565	0.0671786	0.0567013	0.0395585	0.0498624
sp|Q92845|KIFA3_HUMAN	KIFAP3	KIFA3_HUMAN Kinesin-associated protein 3	6	5.29796	6.50323	5.70369	5.36322	6.80912	7.42496	6.59148	6.76774	6.87672	7.04215	6.73354	6.0477	6.30137	5.97395	5.67797	4.88518	5.71702	6.89832	6.67503	5.70962	1.20663	1.16757	0.998704	0.270982	0.223509	-0.0018705	0.0968162	0.0527014	0.0654402	0.10609
sp|Q96MX6|WDR92_HUMAN	WDR92	WDR92_HUMAN WD repeat-containing protein 92	11	5.30823	5.96155	5.85404	6.20214	6.27065	6.96411	6.68415	6.52276	6.71599	6.75513	6.99566	6.76508	5.67742	5.86274	5.90271	5.55764	5.83149	6.61042	6.80797	5.75013	1.13357	1.16745	0.986048	0.180877	0.223359	-0.0202706	0.064817	0.0439883	0.0186416	0.028096
sp|P50749|RASF2_HUMAN	RASSF2	RASF2_HUMAN Ras association domain-containing protein 2	1	5.52718	6.13942	6.15331	5.73267	6.49182	7.48099	6.50128	7.12072	7.33308	6.33587	6.8115	7.01459	5.12047	5.20929	5.99206	5.03575	5.88814	6.8987	6.87376	5.33939	1.17163	1.16739	0.906804	0.228512	0.223286	-0.141138	0.0526134	0.0706099	0.0608016	0.0825642
sp|Q99985|SEM3C_HUMAN	SEMA3C	SEM3C_HUMAN Semaphorin-3C	1	5.97302	5.25597	6.1512	5.71524	5.98284	5.05333	5.70583	6.29179	6.17063	8.4614	6.29525	6.03026	6.98023	7.12358	5.88224	6.92719	5.77386	5.75845	6.73939	6.72831	0.997331	1.16722	1.16531	-0.00385559	0.223081	0.220709	0.0673529	0.0916044	0.171099	0.0847336
sp|P37287|PIGA_HUMAN	PIGA	PIGA_HUMAN Phosphatidylinositol N-acetylglucosaminyltransferase subunit A	1	5.79029	5.57202	5.82568	7.30437	5.88401	6.38111	5.67792	5.95547	6.91942	7.43831	8.5493	5.67766	5.05219	6.78127	4.49312	6.69786	6.12309	5.97463	7.14617	5.75611	0.975754	1.16709	0.940066	-0.0354111	0.222911	-0.0891657	0.129913	0.0494479	0.166792	0.201318
sp|P58317|ZN121_HUMAN	ZNF121	ZN121_HUMAN Zinc finger protein 121	1	4.49804	5.51141	6.32599	5.82729	6.26419	7.59089	6.48857	5.78742	5.72113	7.17549	6.50288	6.44506	6.32029	7.01659	4.86638	7.65837	5.54068	6.53277	6.46114	6.46541	1.17905	1.16613	1.1669	0.237631	0.221725	0.222678	0.139289	0.116888	0.0919952	0.185279
sp|Q86UQ0-3|ZN589_HUMAN	ZNF589	ZN589_HUMAN Isoform 3 of Zinc finger protein 589	1	4.93761	8.01911	5.90381	5.73696	6.26708	5.66801	6.20014	6.33268	8.24556	7.8404	5.08445	7.5018	3.10705	7.24199	7.22306	4.6903	6.14937	6.11698	7.16805	5.5656	0.994732	1.16566	0.905068	-0.00762023	0.221142	-0.143902	0.213987	0.0497245	0.198374	0.36482
sp|Q5T7M9|FA69A_HUMAN	FAM69A	FA69A_HUMAN Protein FAM69A	1	5.12155	6.38016	6.03837	5.76412	6.71676	6.2705	5.51955	6.07542	6.71675	6.44705	6.42004	7.56874	7.89315	5.49308	5.01587	6.5589	5.82605	6.14556	6.78815	6.24025	1.05484	1.16514	1.07109	0.0770258	0.220499	0.0990857	0.091486	0.0807437	0.0791618	0.204614
sp|Q9Y4X0|AMMR1_HUMAN	AMMECR1	AMMR1_HUMAN AMME syndrome candidate gene 1 protein	7	5.51022	6.02555	5.64902	6.17353	6.49741	7.11631	6.58784	6.03735	7.39455	6.66157	6.73458	6.41931	5.86563	5.90186	5.66362	5.76164	5.83958	6.55973	6.8025	5.79819	1.12332	1.1649	0.992912	0.167771	0.220201	-0.0102626	0.0533247	0.0674523	0.0613107	0.0185595
sp|P46108-2|CRK_HUMAN	CRK	CRK_HUMAN Isoform Crk-I of Adapter molecule crk	1	5.63981	6.57751	5.5884	5.72207	6.5774	7.08902	6.89063	6.66878	6.90495	6.52406	7.60079	6.37496	4.96158	6.17936	5.4959	5.20478	5.88195	6.80646	6.85119	5.4604	1.15718	1.16478	0.928333	0.21061	0.220061	-0.107286	0.0793895	0.0337541	0.0798834	0.0964631
sp|P31146|COR1A_HUMAN	CORO1A	COR1A_HUMAN Coronin-1A	6	5.44626	6.13418	5.69396	5.88453	6.40476	6.97574	6.66291	6.36516	6.59322	6.7843	6.70958	6.8821	6.12251	5.82957	5.96068	5.55054	5.78973	6.60214	6.7423	5.86582	1.14032	1.16453	1.01314	0.189438	0.219744	0.0188373	0.0503339	0.042697	0.0180849	0.0412456
sp|A6NKF1|SAC31_HUMAN	SAC3D1	SAC31_HUMAN SAC3 domain-containing protein 1	2	5.6697	6.50916	5.03527	5.94797	6.90068	6.83738	6.29609	6.11951	6.89183	6.89581	6.83703	6.34349	6.72574	6.08786	5.44426	5.45822	5.79053	6.53842	6.74204	5.92902	1.12916	1.16432	1.02392	0.175247	0.219491	0.0340995	0.105812	0.0595506	0.0396097	0.102899
sp|Q8WWH5|TRUB1_HUMAN	TRUB1	TRUB1_HUMAN Probable tRNA pseudouridine synthase 1	18	5.80183	6.39794	5.20756	5.82468	6.96287	7.28534	6.43907	6.43789	7.08626	6.7168	6.72252	6.51892	6.0063	5.63234	5.70121	5.25848	5.808	6.78129	6.76112	5.64958	1.16758	1.16411	0.972724	0.223518	0.219221	-0.0398978	0.0836945	0.0615168	0.034983	0.0543811
tr|G3V5Q1|G3V5Q1_HUMAN	APEX1	G3V5Q1_HUMAN DNA-(apurinic or apyrimidinic site) lyase (Fragment)	1	5.85871	6.67597	5.74449	5.36083	4.77432	4.94231	6.63318	6.43225	6.75683	6.17839	9.45736	5.12378	6.07822	5.95481	7.36198	6.66657	5.91	5.69552	6.87909	6.51539	0.963708	1.16397	1.10244	-0.0533318	0.21906	0.140695	0.0936158	0.170768	0.268499	0.0988718
sp|Q9BQA9|CQ062_HUMAN	C17orf62	CQ062_HUMAN Uncharacterized protein C17orf62	1	5.67168	6.35896	5.61247	5.77245	6.38045	7.21807	5.61799	6.88998	6.91396	6.63415	6.93933	6.76569	6.09086	5.75062	5.5247	5.85865	5.85389	6.52662	6.81328	5.80621	1.11492	1.16389	0.991855	0.156941	0.218954	-0.0117995	0.0586155	0.106782	0.0208219	0.0405275
sp|Q9NPA5|ZF64A_HUMAN	ZFP64	ZF64A_HUMAN Zinc finger protein 64 homolog, isoforms 1 and 2	1	5.26096	5.89344	7.17487	5.62555	5.74911	5.46265	6.42719	7.39416	6.44233	7.95953	7.53072	5.92192	5.85253	6.01474	4.75284	6.53745	5.98871	6.25828	6.96362	5.78939	1.04501	1.16279	0.966718	0.0635216	0.217594	-0.0488327	0.138958	0.137177	0.135483	0.129597
sp|Q13470-2|TNK1_HUMAN	TNK1	TNK1_HUMAN Isoform 2 of Non-receptor tyrosine-protein kinase TNK1	7	5.65614	6.52448	5.72761	5.38705	6.68652	6.71546	5.81975	6.27168	6.74251	7.11946	6.52986	6.68384	6.5067	5.84727	5.74214	6.03952	5.82382	6.37335	6.76892	6.03391	1.09436	1.16228	1.03607	0.130087	0.216959	0.0511268	0.0840651	0.0660688	0.0369792	0.0560816
sp|Q86X10-3|RLGPB_HUMAN	RALGAPB	RLGPB_HUMAN Isoform 3 of Ral GTPase-activating protein subunit beta	1	6.88048	6.29699	5.3798	5.15649	7.03458	5.93209	6.50802	6.61191	8.66418	6.69119	5.91156	6.29455	6.62635	5.47108	5.12781	5.41292	5.92844	6.52165	6.89037	5.65954	1.10006	1.16226	0.954642	0.137584	0.216929	-0.0669677	0.135613	0.0696516	0.17773	0.116929
sp|Q13445|TMED1_HUMAN	TMED1	TMED1_HUMAN Transmembrane emp24 domain-containing protein 1	4	5.76229	6.63607	5.37826	5.03429	7.6702	7.19676	6.40829	6.69922	6.81019	6.63392	7.23237	5.82991	6.623	5.77653	5.61752	4.69119	5.70273	6.99362	6.6266	5.67706	1.22636	1.162	0.995499	0.294387	0.216616	-0.00650811	0.12093	0.0795397	0.0886563	0.139449
sp|P49796|RGS3_HUMAN	RGS3	RGS3_HUMAN Regulator of G-protein signaling 3	3	5.24097	6.3305	4.98496	6.78464	6.42954	7.14483	6.52188	5.12051	6.663	7.40939	6.06146	6.98573	6.57836	6.31103	5.54386	5.88933	5.83527	6.30419	6.7799	6.08064	1.08036	1.16188	1.04205	0.111512	0.216464	0.0594256	0.147512	0.134936	0.0838019	0.0750959
sp|Q7L4E1|FA73B_HUMAN	FAM73B	FA73B_HUMAN Protein FAM73B	2	5.94931	6.86684	5.91096	4.99434	5.83247	6.40211	6.11562	5.61032	6.16064	5.84874	7.93434	7.61662	7.21632	5.52005	5.72815	6.29317	5.93036	5.99013	6.89009	6.18942	1.01008	1.16183	1.04368	0.014467	0.216401	0.0616845	0.128931	0.0573938	0.150709	0.122553
sp|P16591|FER_HUMAN	FER	FER_HUMAN Tyrosine-protein kinase Fer	17	5.42734	5.9618	5.29894	5.81467	6.10269	6.56551	6.04202	6.61012	6.42615	7.19182	6.41158	6.11286	7.06893	6.14813	6.21495	6.60249	5.62569	6.33009	6.5356	6.50862	1.12521	1.16174	1.15695	0.170195	0.216291	0.210323	0.0557213	0.0472639	0.0704886	0.0651217
sp|Q8IYU2|HACE1_HUMAN	HACE1	HACE1_HUMAN E3 ubiquitin-protein ligase HACE1	3	5.64039	6.16967	6.16831	6.07074	6.30068	7.01345	6.81178	5.71266	6.38796	6.31229	7.5037	7.72884	6.46362	5.42272	5.01292	5.28027	6.01228	6.45964	6.9832	5.54488	1.07441	1.16149	0.92226	0.103543	0.215976	-0.116755	0.0419499	0.0899995	0.105598	0.11463
sp|Q86TG7|PEG10_HUMAN	PEG10	PEG10_HUMAN Retrotransposon-derived protein PEG10	3	5.23364	6.24071	6.04284	6.50223	6.74703	7.13665	6.3603	6.5316	6.81195	6.42198	7.10975	7.54937	5.95657	5.30471	5.0434	5.00726	6.00486	6.6939	6.97326	5.32798	1.11475	1.16127	0.88728	0.156717	0.215704	-0.172539	0.091174	0.0500312	0.0682976	0.0824913
sp|P41240|CSK_HUMAN	CSK	CSK_HUMAN Tyrosine-protein kinase CSK	30	5.49578	5.80688	5.37343	5.66539	6.5307	6.45447	5.87829	6.05108	6.90462	6.38745	6.25613	6.39316	7.20199	6.56212	6.66835	6.37015	5.58537	6.22863	6.48534	6.70065	1.11517	1.16113	1.19968	0.157263	0.215529	0.262649	0.0340355	0.050474	0.0441914	0.0531709
sp|O75319|DUS11_HUMAN	DUSP11	DUS11_HUMAN RNA/RNP complex-1-interacting phosphatase	2	6.29933	6.05231	5.76236	5.50345	6.42277	6.48136	6.58196	5.86711	6.3781	6.67273	6.5418	7.82676	6.68144	4.80133	5.56162	6.56557	5.90436	6.3383	6.85485	5.90249	1.07349	1.16098	0.999683	0.102315	0.215343	-0.000457607	0.058571	0.0506337	0.0961446	0.150748
sp|P07099|HYEP_HUMAN	EPHX1	HYEP_HUMAN Epoxide hydrolase 1	30	5.47895	6.02783	5.55088	5.88593	6.56087	6.77734	6.43833	6.34411	6.64799	6.80038	6.68996	6.49723	6.14145	6.03427	6.36325	5.76122	5.7359	6.53016	6.65889	6.07505	1.13847	1.16092	1.05913	0.1871	0.215262	0.0828764	0.0459047	0.0286611	0.0188443	0.0411652
sp|O75396|SC22B_HUMAN	SEC22B	SC22B_HUMAN Vesicle-trafficking protein SEC22b	12	5.95912	6.4246	5.32104	5.50937	6.63894	7.1458	6.7099	6.41343	7.14086	7.19563	6.59953	6.01163	5.87873	5.86521	5.83463	5.35157	5.80353	6.72702	6.73691	5.73253	1.15912	1.16083	0.987767	0.213036	0.215156	-0.0177581	0.084955	0.0455577	0.0821332	0.0444211
sp|O00116|ADAS_HUMAN	AGPS	ADAS_HUMAN Alkyldihydroxyacetonephosphate synthase, peroxisomal	45	5.66985	6.42537	5.23665	5.75846	6.81561	7.33609	6.34316	6.5384	7.13856	6.78929	6.52394	6.35163	6.17201	5.65795	5.972	5.27104	5.77258	6.75832	6.70085	5.76825	1.17076	1.16081	0.999249	0.227447	0.215128	-0.00108319	0.0851081	0.0638042	0.0511669	0.0681737
sp|Q9UM54-6|MYO6_HUMAN	MYO6	MYO6_HUMAN Isoform 6 of Unconventional myosin-VI	60	5.66362	6.61554	5.13684	5.61103	7.31909	7.55708	6.02193	6.40087	7.28601	6.84304	6.33803	6.26085	6.40217	5.7389	5.62846	5.17654	5.75676	6.82474	6.68198	5.73652	1.18552	1.16072	0.996484	0.245518	0.21502	-0.00508126	0.10763	0.10717	0.0715874	0.0882207
sp|O75815|BCAR3_HUMAN	BCAR3	BCAR3_HUMAN Breast cancer anti-estrogen resistance protein 3	2	5.25072	5.26718	5.9775	6.29215	6.43595	6.69126	7.08937	6.66829	6.41635	6.52751	6.8147	6.67078	5.92508	5.74382	6.53426	5.69507	5.69689	6.72122	6.60734	5.97456	1.17981	1.15981	1.04874	0.238549	0.213895	0.0686579	0.0915921	0.0403466	0.0261955	0.0646131
sp|P31930|QCR1_HUMAN	UQCRC1	QCR1_HUMAN Cytochrome b-c1 complex subunit 1, mitochondrial	30	5.72184	6.5992	5.10641	5.66114	6.95432	7.28322	6.31207	6.51809	7.02561	6.78131	6.53129	6.43729	6.08386	5.72123	5.97692	5.28619	5.77215	6.76693	6.69388	5.76705	1.17234	1.15969	0.999117	0.229392	0.213733	-0.00127464	0.106893	0.0644424	0.0395215	0.0615293
sp|Q9ULC8-3|ZDHC8_HUMAN	ZDHHC8	ZDHC8_HUMAN Isoform 3 of Probable palmitoyltransferase ZDHHC8	1	6.16882	4.20457	4.97569	7.03448	5.98912	6.35818	6.34589	4.98951	5.79056	5.88296	6.60955	7.66779	6.45604	6.61883	8.31759	6.59042	5.59589	5.92068	6.48771	6.99572	1.05804	1.15937	1.25015	0.0813941	0.213343	0.322105	0.224109	0.108761	0.133759	0.126378
sp|Q9UKA8|RCAN3_HUMAN	RCAN3	RCAN3_HUMAN Calcipressin-3	1	5.33706	5.56148	6.09765	6.36276	6.11101	6.8324	5.48948	6.80974	6.95896	5.90404	7.1309	7.08012	5.61969	5.99938	6.68112	6.02421	5.83974	6.31066	6.76851	6.0811	1.08064	1.15904	1.04133	0.111887	0.212934	0.0584288	0.0809362	0.101691	0.0858101	0.0724822
sp|P32019|I5P2_HUMAN	INPP5B	I5P2_HUMAN Type II inositol 1,4,5-trisphosphate 5-phosphatase	5	5.66802	5.94666	5.71075	5.71376	6.40393	7.37788	6.51854	6.69522	6.56829	7.01973	6.40904	6.70415	5.79728	6.102	5.89172	5.47303	5.7598	6.74889	6.6753	5.81601	1.17172	1.15895	1.00976	0.228633	0.212815	0.014011	0.0219303	0.064619	0.0388543	0.0450017
sp|P49137|MAPK2_HUMAN	MAPKAPK2	MAPK2_HUMAN MAP kinase-activated protein kinase 2	12	5.50513	6.30128	5.54967	5.86464	6.78146	7.07356	6.62885	6.49881	6.73906	6.78469	6.81325	6.56659	6.1773	5.63248	5.83348	5.24975	5.80518	6.74567	6.7259	5.72325	1.16201	1.1586	0.985887	0.216621	0.212386	-0.0205055	0.0632897	0.0366513	0.0164309	0.0677277
sp|P21964|COMT_HUMAN	COMT	COMT_HUMAN Catechol O-methyltransferase	27	5.61784	6.1566	5.63787	5.70772	6.57154	7.62712	6.58778	6.23943	6.61676	7.34905	6.76043	6.04731	5.82385	5.97214	5.87653	5.40801	5.78001	6.75647	6.69339	5.77013	1.16894	1.15802	0.998292	0.225198	0.211665	-0.00246692	0.0439447	0.0891328	0.0798831	0.0431698
sp|O94812|BAIP3_HUMAN	BAIAP3	BAIP3_HUMAN BAI1-associated protein 3	1	6.25742	6.45032	5.70122	5.35739	6.16902	6.72379	6.06166	6.37924	6.73342	6.1339	7.26714	7.38158	5.41084	6.49196	5.01127	6.46984	5.94159	6.33343	6.87901	5.84598	1.06595	1.15777	0.983908	0.092138	0.211353	-0.0234042	0.0845791	0.0460664	0.0830691	0.128486
sp|Q969M3-3|YIPF5_HUMAN	YIPF5	YIPF5_HUMAN Isoform 3 of Protein YIPF5	1	6.55459	6.3711	4.47508	5.02631	5.7089	7.73148	6.33326	8.23928	6.91585	7.22055	6.41686	5.40846	3.51813	6.54817	6.21256	7.31943	5.60677	7.00323	6.49043	5.89957	1.24907	1.15761	1.05222	0.320851	0.211144	0.0734405	0.18131	0.168597	0.122296	0.280338
sp|O75581|LRP6_HUMAN	LRP6	LRP6_HUMAN Low-density lipoprotein receptor-related protein 6	1	6.97829	6.60497	4.98345	5.48252	6.57708	6.5921	5.45105	6.00616	7.15725	6.11434	7.16334	7.40442	6.46528	6.24943	5.66927	5.10103	6.01231	6.1566	6.95984	5.87125	1.024	1.1576	0.976539	0.0342145	0.211135	-0.0342505	0.155542	0.0883151	0.0826597	0.104528
sp|Q6P1M9|ARMX5_HUMAN	ARMCX5	ARMX5_HUMAN Armadillo repeat-containing X-linked protein 5	3	5.63104	6.08918	5.58278	6.1433	6.31674	6.67411	6.22262	6.43691	7.15667	6.54801	6.51815	6.91118	6.36163	5.39852	6.16161	5.84755	5.86157	6.4126	6.7835	5.94233	1.09401	1.15728	1.01378	0.12962	0.210742	0.0197398	0.0504213	0.0304336	0.0451509	0.0706399
sp|Q96T60|PNKP_HUMAN	PNKP	PNKP_HUMAN Bifunctional polynucleotide phosphatase/kinase	15	5.71174	6.51957	5.36174	5.8081	7.15413	7.06816	6.09976	6.24952	6.88544	6.67451	6.7695	6.73331	6.5283	5.46663	5.88273	5.08686	5.85029	6.64289	6.76569	5.74113	1.13548	1.15647	0.981342	0.183304	0.20973	-0.0271728	0.0830145	0.0820829	0.0131418	0.107519
sp|Q8N729|NPW_HUMAN	NPW	NPW_HUMAN Neuropeptide W	2	5.61002	4.26347	6.0256	6.97825	5.72711	6.65027	5.53696	6.69889	7.35802	6.52698	6.0372	6.53135	5.87973	7.22352	7.08174	5.87087	5.71934	6.15331	6.61339	6.51396	1.07588	1.15632	1.13894	0.105515	0.209542	0.187689	0.197045	0.0986824	0.0828509	0.113563
sp|Q6NT55|CP4FN_HUMAN	CYP4F22	CP4FN_HUMAN Cytochrome P450 4F22	6	5.57041	6.03957	6.08981	6.22757	6.1658	6.84247	6.17574	6.27863	6.74862	7.09197	7.04801	6.77903	5.47545	6.03063	5.91722	5.51907	5.98184	6.36566	6.91691	5.73559	1.06416	1.15632	0.958834	0.0897208	0.209538	-0.0606468	0.0477392	0.0505745	0.0257494	0.0487548
sp|Q8TAD4|ZNT5_HUMAN	SLC30A5	ZNT5_HUMAN Zinc transporter 5	4	5.40608	6.11646	6.13599	6.03659	6.72449	6.14744	6.33218	6.51166	6.47614	6.58235	6.99593	7.33646	5.74004	6.09622	5.63205	5.7299	5.92378	6.42894	6.84772	5.79955	1.08528	1.15597	0.979029	0.118063	0.209106	-0.0305765	0.0587128	0.0383959	0.0577605	0.0351207
sp|Q9P2G9|KLHL8_HUMAN	KLHL8	KLHL8_HUMAN Kelch-like protein 8	1	6.51546	5.56502	5.91297	5.12404	6.57237	5.24449	5.00781	5.93047	6.99366	7.07779	4.94154	7.70521	7.14768	7.13052	6.58547	6.5455	5.77937	5.68879	6.67955	6.85229	0.984326	1.15576	1.18565	-0.0227923	0.208838	0.245674	0.101636	0.124309	0.179859	0.0484002
sp|Q969T7|5NT3B_HUMAN	NT5C3B	5NT3B_HUMAN 7-methylguanosine phosphate-specific 5'-nucleotidase	7	5.35064	6.61679	5.56396	6.05657	6.73771	6.6898	6.18717	6.16177	6.88848	6.95995	6.57963	6.83218	6.23251	5.58598	5.92829	5.62858	5.89699	6.44411	6.81506	5.84384	1.09278	1.15568	0.990987	0.128003	0.208748	-0.0130621	0.0955767	0.0484384	0.0242746	0.0514334
sp|Q05397-5|FAK1_HUMAN	PTK2	FAK1_HUMAN Isoform 5 of Focal adhesion kinase 1	32	5.57178	5.98686	5.38693	5.70883	6.39064	6.48798	6.03225	5.95065	6.68677	6.47338	6.50563	6.50935	6.68498	6.60636	6.71442	6.30319	5.6636	6.21538	6.54378	6.57724	1.09743	1.15541	1.16132	0.134123	0.208405	0.215762	0.0446122	0.0424303	0.0147749	0.02863
sp|O43776|SYNC_HUMAN	NARS	SYNC_HUMAN Asparagine--tRNA ligase, cytoplasmic	41	5.56029	6.20279	5.34949	6.02155	6.77313	6.83338	6.29011	6.57284	6.93366	6.65219	6.6228	6.49025	6.44414	5.70153	6.18394	5.36789	5.78353	6.61736	6.67472	5.92437	1.14417	1.15409	1.02435	0.194307	0.206758	0.0347126	0.0684857	0.0370165	0.0279326	0.0813526
sp|Q16773|KAT1_HUMAN	CCBL1	KAT1_HUMAN Kynurenine--oxoglutarate transaminase 1	4	6.03074	5.70346	6.5566	6.02458	5.80174	5.31502	5.92429	5.93669	10.0611	5.22707	6.11073	6.66295	5.79995	6.31951	5.95867	6.56686	6.07885	5.74443	7.01546	6.16125	0.944988	1.15408	1.01356	-0.0816322	0.206741	0.0194253	0.0581165	0.0509508	0.301448	0.0563131
sp|P51991|ROA3_HUMAN	HNRNPA3	ROA3_HUMAN Heterogeneous nuclear ribonucleoprotein A3	24	5.75641	6.62518	5.3537	5.19686	6.57142	8.77864	6.63833	6.63272	6.34394	7.88666	6.48134	5.74444	5.50599	5.83136	5.3876	5.26541	5.73304	7.15528	6.61409	5.49759	1.24808	1.15368	0.958931	0.319708	0.206244	-0.0605004	0.11159	0.15131	0.137086	0.0442425
sp|O75063|XYLK_HUMAN	FAM20B	XYLK_HUMAN Glycosaminoglycan xylosylkinase	7	5.63818	6.48356	5.61613	5.68265	6.72058	6.81911	5.99031	6.43315	7.3472	6.52074	6.50254	6.64825	6.30736	5.86358	6.06505	5.36161	5.85513	6.49079	6.75468	5.8994	1.10856	1.15363	1.00756	0.148692	0.206187	0.010867	0.0717091	0.0572601	0.0592619	0.0681116
sp|P14324|FPPS_HUMAN	FDPS	FPPS_HUMAN Farnesyl pyrophosphate synthase	15	5.84695	6.13526	5.26903	5.71759	6.97257	6.75118	6.40293	6.41246	7.01858	6.36416	6.54326	6.56883	6.51579	5.86939	6.20639	5.4056	5.74221	6.63478	6.62371	5.99929	1.15544	1.15351	1.04477	0.208444	0.206034	0.0631869	0.0627875	0.0418081	0.0420537	0.0793005
sp|Q9BPZ7|SIN1_HUMAN	MAPKAP1	SIN1_HUMAN Target of rapamycin complex 2 subunit MAPKAP1	3	5.59207	5.96457	5.42062	6.34574	6.5422	7.24847	5.71788	5.91659	6.95027	6.82967	6.77806	6.33636	6.27091	6.37601	5.90262	5.80797	5.83075	6.35628	6.72359	6.08938	1.09013	1.15313	1.04436	0.124502	0.20555	0.0626133	0.070595	0.108674	0.039867	0.0453895
sp|Q9P2Y5|UVRAG_HUMAN	UVRAG	UVRAG_HUMAN UV radiation resistance-associated gene protein	2	6.20677	5.89112	5.55765	6.16046	7.06016	6.89903	6.22371	5.79253	6.5594	7.10286	7.11587	6.67116	6.26331	5.34826	5.74534	5.40237	5.954	6.49386	6.86232	5.68982	1.09067	1.15256	0.95563	0.125217	0.204838	-0.0654762	0.0501586	0.0910898	0.0421045	0.0739599
sp|Q969T3|SNX21_HUMAN	SNX21	SNX21_HUMAN Sorting nexin-21	2	5.70198	5.5279	6.10011	6.06243	6.77294	6.59812	6.33588	6.38799	6.56389	6.26738	7.43493	6.68596	5.29776	5.52816	6.88205	5.85251	5.8481	6.52373	6.73804	5.89012	1.11553	1.15217	1.00718	0.157728	0.20436	0.0103278	0.0476876	0.0308296	0.07372	0.118732
sp|Q9HB19|PKHA2_HUMAN	PLEKHA2	PKHA2_HUMAN Pleckstrin homology domain-containing family A member 2	1	5.83284	6.16342	5.00609	5.93753	6.56362	7.14495	5.68636	5.91838	6.95267	6.66465	5.69964	7.10078	6.27251	6.31279	6.65145	6.09232	5.73497	6.32833	6.60443	6.33227	1.10346	1.15161	1.10415	0.142038	0.203649	0.142936	0.0880775	0.104118	0.0953586	0.0368561
sp|Q14999-2|CUL7_HUMAN	CUL7	CUL7_HUMAN Isoform 2 of Cullin-7	4	5.2759	6.08167	5.80932	5.72854	6.21159	6.82051	6.71555	7.23733	6.31949	6.43296	6.70726	6.88753	6.12302	5.66911	6.13446	5.84576	5.72386	6.74625	6.58681	5.94309	1.17862	1.15076	1.0383	0.237097	0.202592	0.0542249	0.0584701	0.062508	0.0392063	0.0380655
sp|Q96MV1|TMM56_HUMAN	TMEM56	TMM56_HUMAN Transmembrane protein 56	1	5.09564	6.12969	5.49547	6.19007	5.69648	6.81308	7.69139	7.59847	5.55633	7.50971	7.24869	6.04845	6.04845	5.87708	5.04793	5.95306	5.72772	6.94985	6.59079	5.73163	1.21337	1.15068	1.00068	0.279023	0.202492	0.000985142	0.0917669	0.132924	0.142372	0.0804589
sp|P43357|MAGA3_HUMAN	MAGEA3	MAGA3_HUMAN Melanoma-associated antigen 3	1	6.20318	5.63601	6.83173	5.7373	5.02253	5.67244	6.72489	5.95944	7.74545	6.83511	6.39251	7.1127	7.28525	6.33407	5.93457	4.57284	6.10206	5.84483	7.02144	6.03168	0.957845	1.15067	0.988467	-0.0621354	0.202472	-0.0167347	0.0894054	0.120719	0.0806824	0.186605
sp|Q96JB2|COG3_HUMAN	COG3	COG3_HUMAN Conserved oligomeric Golgi complex subunit 3	17	5.85825	6.40905	5.54108	5.641	6.53708	7.05345	6.13845	6.64284	6.92164	6.76511	6.61437	6.67311	5.95894	5.67456	6.13562	5.43546	5.86234	6.59295	6.74356	5.80114	1.12463	1.15032	0.98956	0.169447	0.202032	-0.0151402	0.0661467	0.0570382	0.0198638	0.0532727
sp|Q9UGK8|SRGEF_HUMAN	SERGEF	SRGEF_HUMAN Secretion-regulating guanine nucleotide exchange factor	4	5.57184	6.01289	5.97646	5.92458	6.34838	7.16453	6.29685	6.11386	6.69604	6.73143	6.9013	6.67764	5.96385	5.70168	6.07013	5.84855	5.87144	6.4809	6.7516	5.89605	1.1038	1.14991	1.00419	0.14248	0.201515	0.00603438	0.0345733	0.0720158	0.0151467	0.0268056
sp|Q04771|ACVR1_HUMAN	ACVR1	ACVR1_HUMAN Activin receptor type-1	6	5.58301	6.25271	6.05839	5.88137	6.54314	6.29585	6.16672	6.24323	6.8138	7.02848	6.52946	6.96759	5.99009	6.41685	5.73128	5.49804	5.94387	6.31224	6.83483	5.90907	1.06197	1.1499	0.994144	0.0867484	0.201503	-0.00847269	0.047845	0.0257929	0.0325867	0.0666236
sp|Q6ZT21|TMPPE_HUMAN	TMPPE	TMPPE_HUMAN Transmembrane protein with metallophosphoesterase domain	1	5.70733	6.71443	5.46147	6.15916	6.26255	6.92749	5.78621	6.02792	6.74116	7.25448	6.67522	6.97373	5.80795	6.05835	5.99678	5.44574	6.0106	6.25104	6.91115	5.82721	1.04	1.14983	0.969488	0.0565884	0.201417	-0.0447043	0.0916795	0.0785645	0.0379483	0.0473166
sp|Q8N5C8|TAB3_HUMAN	TAB3	TAB3_HUMAN TGF-beta-activated kinase 1 and MAP3K7-binding protein 3	2	5.41124	6.45909	5.6625	5.47245	6.34933	7.52547	6.65637	6.61439	6.32843	7.18761	6.29681	6.63437	5.97235	6.05015	5.92935	5.45008	5.75132	6.78639	6.61181	5.85048	1.17997	1.14962	1.01724	0.238751	0.201151	0.0246625	0.0841236	0.0753164	0.0624565	0.0464195
sp|Q15438|CYH1_HUMAN	CYTH1	CYH1_HUMAN Cytohesin-1	4	5.3336	6.48024	5.97592	5.7375	5.9209	7.29034	6.87646	6.64337	6.576	6.78241	7.09921	6.58625	5.63467	5.73873	5.89253	5.43188	5.88182	6.68277	6.76097	5.67445	1.13617	1.14947	0.964745	0.184184	0.200968	-0.0517802	0.0814381	0.0859024	0.0361903	0.0340678
sp|Q8N6T7|SIR6_HUMAN	SIRT6	SIR6_HUMAN NAD-dependent protein deacetylase sirtuin-6	12	5.77221	6.0223	5.62997	5.8324	6.88704	7.43939	6.66675	6.56068	6.90916	6.61044	6.77322	6.43909	5.89858	5.44155	5.85672	5.26049	5.81422	6.88847	6.68298	5.61434	1.18476	1.14942	0.965621	0.244597	0.200905	-0.0504705	0.0279702	0.0568529	0.030427	0.0558165
sp|Q9UHI6|DDX20_HUMAN	DDX20	DDX20_HUMAN Probable ATP-dependent RNA helicase DDX20	14	5.35897	6.24736	5.74218	5.98353	6.39827	7.09843	6.31725	6.38689	6.62496	6.83088	6.80449	6.54716	6.1625	6.10835	5.97643	5.41236	5.83301	6.55021	6.70187	5.91491	1.12296	1.14896	1.01404	0.167301	0.200324	0.0201157	0.0647018	0.0560639	0.0205719	0.0581625
sp|P20073|ANXA7_HUMAN	ANXA7	ANXA7_HUMAN Annexin A7	29	5.65597	6.30944	5.44539	5.98088	6.74193	7.01516	6.22955	6.672	6.9607	6.75973	6.53256	6.61516	5.97281	5.83756	5.76765	5.5035	5.84792	6.66466	6.71704	5.77038	1.13966	1.14862	0.986741	0.188608	0.199902	-0.0192572	0.0647064	0.0488662	0.0279321	0.0341833
sp|O14792|HS3S1_HUMAN	HS3ST1	HS3S1_HUMAN Heparan sulfate glucosamine 3-O-sulfotransferase 1	2	5.80539	6.60491	5.78395	5.03588	7.03742	7.25006	7.10665	6.05435	7.59921	6.42015	6.07015	6.59235	5.83999	6.079	5.67808	5.04246	5.80753	6.86212	6.67046	5.65988	1.18159	1.14859	0.974576	0.240729	0.199862	-0.0371532	0.110337	0.0795302	0.0983705	0.0783295
sp|Q69YU5|CL073_HUMAN	C12orf73	CL073_HUMAN Uncharacterized protein C12orf73	4	4.87296	5.54847	6.56268	6.65922	4.35523	6.7428	6.67434	6.02006	5.87278	8.97063	7.12082	5.19151	5.81918	6.52876	7.02059	6.03997	5.91083	5.94811	6.78894	6.35213	1.00631	1.14856	1.07466	0.00906938	0.199824	0.103878	0.144663	0.186742	0.24443	0.084265
sp|Q9H867|MT21D_HUMAN	VCPKMT	MT21D_HUMAN Protein-lysine methyltransferase METTL21D	1	4.7795	6.80178	5.93965	7.1519	5.74995	7.22223	5.87995	5.57303	8.13267	5.78401	6.49636	7.91435	5.87602	5.05217	5.08004	6.5664	6.16821	6.10629	7.08185	5.64366	0.989962	1.14812	0.914959	-0.0145552	0.199274	-0.128221	0.171313	0.123564	0.159433	0.128304
sp|Q6P1K8|T2H2L_HUMAN	GTF2H2C	T2H2L_HUMAN General transcription factor IIH subunit 2-like protein	9	5.77041	5.97204	5.82685	6.37164	6.59525	6.53997	6.17381	6.06916	6.60811	6.17196	7.71689	6.98573	5.95991	5.87992	5.73855	5.61982	5.98523	6.34455	6.87067	5.79955	1.06003	1.14794	0.968976	0.0841094	0.199043	-0.0454669	0.0453187	0.0413053	0.09531	0.0259976
sp|Q9NQG6|MID51_HUMAN	MIEF1	MID51_HUMAN Mitochondrial dynamics protein MID51	5	5.73745	6.52798	5.56742	5.82071	6.63388	6.79011	6.63268	6.22662	6.82055	6.64882	6.84948	6.83349	6.07696	5.64781	5.79405	5.39199	5.91339	6.57082	6.78808	5.7277	1.11118	1.14792	0.968599	0.152089	0.199019	-0.0460289	0.0715441	0.0366901	0.013788	0.0499409
sp|O43663|PRC1_HUMAN	PRC1	PRC1_HUMAN Protein regulator of cytokinesis 1	10	5.418	6.17849	5.86312	6.0404	6.24478	7.87046	6.88801	6.52922	6.69312	6.9307	6.73614	6.61524	5.55568	5.77743	5.27269	5.38652	5.875	6.88312	6.7438	5.49808	1.17159	1.14788	0.935843	0.228473	0.198972	-0.0956616	0.0563207	0.10299	0.0199103	0.0399313
sp|Q9H307|PININ_HUMAN	PNN	PININ_HUMAN Pinin	5	4.92775	6.16723	5.68365	6.08924	5.03832	5.58771	6.01531	7.70222	5.84939	9.1242	5.65735	5.61826	6.97615	6.09784	5.64445	7.82093	5.71697	6.08589	6.5623	6.63484	1.06453	1.14786	1.16055	0.0902182	0.198951	0.214812	0.0992211	0.188857	0.260719	0.145415
sp|P15531-2|NDKA_HUMAN	NME1	NDKA_HUMAN Isoform 2 of Nucleoside diphosphate kinase A	3	6.30097	6.33023	6.26638	5.96145	6.07849	4.91221	7.3046	6.26614	5.44076	10.3105	6.63071	6.14769	5.51655	4.97495	5.2031	6.35525	6.21476	6.14036	7.13241	5.51246	0.988029	1.14766	0.886996	-0.0173749	0.198693	-0.173001	0.0274952	0.159662	0.304854	0.109594
sp|Q9H1K1|ISCU_HUMAN	ISCU	ISCU_HUMAN Iron-sulfur cluster assembly enzyme ISCU, mitochondrial	6	5.50043	4.81258	5.36703	5.32535	5.26947	4.7279	7.24636	7.49102	7.96932	6.22826	5.0721	4.83362	5.53395	5.40521	10.6218	8.59558	5.25135	6.18369	6.02582	7.53913	1.17754	1.14748	1.43566	0.23578	0.198471	0.521711	0.0574886	0.224731	0.23759	0.3355
sp|Q6ICH7|ASPH2_HUMAN	ASPHD2	ASPH2_HUMAN Aspartate beta-hydroxylase domain-containing protein 2	1	5.40122	6.33027	5.92489	5.83699	5.37087	6.30052	5.46685	7.27796	7.25551	5.8344	7.84926	6.00643	6.19635	6.68541	5.96795	6.29513	5.87334	6.10405	6.7364	6.28621	1.03928	1.14694	1.0703	0.055585	0.197796	0.0980087	0.0648826	0.145311	0.1448	0.0476177
sp|Q96N11|CG026_HUMAN	C7orf26	CG026_HUMAN Uncharacterized protein C7orf26	2	5.63353	6.42005	6.56104	5.50806	7.38347	7.56202	5.34343	5.73088	6.4469	7.03474	6.78044	7.40078	5.85939	5.40003	4.87488	6.06036	6.03067	6.50495	6.91572	5.54866	1.07864	1.14676	0.920074	0.10922	0.19756	-0.120178	0.088975	0.173868	0.0582919	0.0950504
sp|O75771-8|RA51D_HUMAN	RAD51D	RA51D_HUMAN Isoform 8 of DNA repair protein RAD51 homolog 4	2	5.95972	6.62688	5.6868	5.64048	6.79198	7.38483	6.14944	5.97245	7.39824	6.93466	6.36225	6.72693	5.98286	5.56429	5.84483	4.97335	5.97847	6.57468	6.85552	5.59133	1.09973	1.1467	0.935245	0.137143	0.19749	-0.0965842	0.0760464	0.0980643	0.0630592	0.0799959
sp|P27144|KAD4_HUMAN	AK4	KAD4_HUMAN Adenylate kinase 4, mitochondrial	19	5.85643	5.72577	5.52822	6.07333	6.72096	7.04015	6.31925	6.63853	6.99735	6.95881	6.17269	6.45595	6.54418	5.72319	5.59012	5.65507	5.79594	6.67972	6.6462	5.87814	1.15248	1.1467	1.01418	0.204746	0.197488	0.0203177	0.0394952	0.0443467	0.0602749	0.076102
sp|O60518|RNBP6_HUMAN	RANBP6	RNBP6_HUMAN Ran-binding protein 6	10	5.92314	6.01558	6.22685	5.94394	6.20778	6.14081	6.21036	5.80272	8.47773	5.97104	6.54725	6.64914	5.84313	5.77927	6.27392	5.98734	6.02738	6.09042	6.91129	5.97092	1.01046	1.14665	0.990632	0.0150107	0.197425	-0.0135784	0.0230202	0.0319324	0.157153	0.0368375
tr|E7ETE0|E7ETE0_HUMAN	METTL8	E7ETE0_HUMAN Methyltransferase-like protein 8	4	5.7076	6.13787	5.64403	6.11147	6.89439	7.09618	5.91802	5.9607	6.84526	6.87809	6.58148	6.75058	6.27526	5.80583	6.10252	5.29071	5.90024	6.46732	6.76385	5.86858	1.09611	1.14637	0.994634	0.132394	0.197071	-0.00776279	0.0441788	0.0951593	0.0196719	0.0734884
sp|O95870|ABHGA_HUMAN	ABHD16A	ABHGA_HUMAN Abhydrolase domain-containing protein 16A	4	5.62699	6.27757	5.63391	6.10041	6.45553	6.78366	5.62591	6.04291	7.28477	6.54622	6.70379	6.55356	6.20605	5.4149	6.41805	6.32577	5.90972	6.227	6.77208	6.09119	1.05369	1.14592	1.03071	0.0754481	0.19651	0.0436349	0.0559242	0.080685	0.0515968	0.0753775
sp|Q9Y2B1|TMEM5_HUMAN	TMEM5	TMEM5_HUMAN Transmembrane protein 5	3	5.43764	6.12845	5.80582	6.29683	6.2313	6.5855	6.19028	5.97668	6.81454	6.90255	6.80559	6.59098	6.13143	6.41506	5.95832	5.72902	5.91718	6.24594	6.77841	6.05846	1.05556	1.14555	1.02387	0.0780077	0.196037	0.0340395	0.064066	0.0404099	0.0195318	0.047748
sp|P50548|ERF_HUMAN	ERF	ERF_HUMAN ETS domain-containing transcription factor ERF	6	5.99403	6.52222	5.95331	5.76912	6.77838	7.39987	6.6354	6.75703	6.60808	7.09654	7.21334	6.84654	4.87679	5.50651	5.15495	4.8879	6.05967	6.89267	6.94113	5.10654	1.13747	1.14546	0.842709	0.185824	0.19593	-0.246894	0.0533888	0.0499005	0.038847	0.0579715
sp|Q6YN16|HSDL2_HUMAN	HSDL2	HSDL2_HUMAN Hydroxysteroid dehydrogenase-like protein 2	29	5.81523	6.42747	5.51341	5.68129	6.58982	7.02326	6.27781	6.52825	6.81774	6.94421	6.67975	6.40426	5.9955	5.86558	6.13536	5.30107	5.85935	6.60478	6.71149	5.82438	1.12722	1.14543	0.994031	0.172771	0.195892	-0.00863676	0.0679881	0.0469207	0.0345004	0.0628138
sp|Q2TAY7|SMU1_HUMAN	SMU1	SMU1_HUMAN WD40 repeat-containing protein SMU1	23	5.68692	6.42308	5.67002	5.75011	6.38397	6.58787	6.33852	6.45533	6.88374	7.0177	6.58608	6.46282	6.1111	5.83577	6.16369	5.64327	5.88253	6.44142	6.73759	5.93846	1.09501	1.14535	1.00951	0.130942	0.195794	0.0136509	0.0615398	0.0168949	0.0381566	0.0410429
sp|Q9Y4C2-2|F115A_HUMAN	FAM115A	F115A_HUMAN Isoform 2 of Protein FAM115A	1	5.72747	6.18017	5.95359	5.69619	7.06482	6.63312	5.88173	6.15739	6.93318	6.17986	7.10718	6.76048	6.16986	5.68201	6.12321	5.74975	5.88936	6.43426	6.74517	5.93121	1.09252	1.14532	1.00711	0.127666	0.195746	0.0102162	0.0382478	0.0812098	0.0596839	0.042301
sp|O75352|MPU1_HUMAN	MPDU1	MPU1_HUMAN Mannose-P-dolichol utilization defect 1 protein	2	6.19716	6.21131	5.61108	5.73288	6.46842	7.67898	6.78618	6.12428	5.57882	7.24652	7.49062	6.88473	5.38689	5.57463	5.69122	5.33629	5.93811	6.76446	6.80017	5.49726	1.13916	1.14518	0.925759	0.187973	0.195568	-0.111291	0.0524322	0.0985895	0.125207	0.0300195
sp|Q9ULQ0|STRP2_HUMAN	STRIP2	STRP2_HUMAN Striatin-interacting protein 2	2	5.89041	6.17618	6.01035	5.486	6.7906	7.37025	6.45256	6.85314	6.75222	6.89994	6.38238	6.94533	5.79992	5.61674	5.36624	5.20774	5.89074	6.86664	6.74497	5.49766	1.16567	1.14501	0.933272	0.221156	0.195364	-0.09963	0.0499367	0.0552025	0.0378649	0.0477646
sp|Q53G59-2|KLH12_HUMAN	KLHL12	KLH12_HUMAN Isoform 2 of Kelch-like protein 12	4	5.70431	6.48997	5.32717	5.74817	6.63943	7.46374	6.18263	6.53921	6.92318	6.85543	6.46909	6.39011	6.21491	6.11656	5.51917	5.41691	5.8174	6.70625	6.65945	5.81689	1.15279	1.14475	0.999911	0.205131	0.195028	-0.000128344	0.0836408	0.0807763	0.040362	0.0699614
sp|Q9Y426|CU025_HUMAN	C2CD2	CU025_HUMAN C2 domain-containing protein 2	4	5.84414	5.99107	5.63676	5.84648	6.99146	6.63393	5.84209	6.24231	7.10092	6.55699	6.25342	6.77797	6.65115	6.14322	6.17289	5.31519	5.82961	6.42745	6.67232	6.07061	1.10255	1.14456	1.04134	0.140846	0.19479	0.0584421	0.025007	0.077149	0.0535948	0.0913916
sp|Q9Y5N5|HEMK2_HUMAN	N6AMT1	HEMK2_HUMAN HemK methyltransferase family member 2	9	5.41372	6.20282	5.60571	6.18074	6.48134	6.62033	6.2753	6.24097	6.93158	6.68501	6.70334	6.46012	6.20572	5.91928	6.04158	6.03245	5.85075	6.40449	6.69501	6.04976	1.09464	1.1443	1.03401	0.130462	0.194466	0.0482564	0.0686436	0.0279199	0.0287708	0.0194916
sp|P08758|ANXA5_HUMAN	ANXA5	ANXA5_HUMAN Annexin A5	91	5.69119	6.32883	5.54064	5.92981	6.63747	6.81182	6.30113	6.45785	6.87447	6.60141	6.92041	6.4799	6.12164	5.80843	6.06955	5.42545	5.87262	6.55207	6.71905	5.85627	1.1157	1.14413	0.997216	0.157947	0.194253	-0.00402222	0.0585372	0.03374	0.0316574	0.0543395
sp|Q9Y6I8|PXMP4_HUMAN	PXMP4	PXMP4_HUMAN Peroxisomal membrane protein 4	2	5.18335	6.17776	5.69257	5.83411	6.84735	6.76716	6.28219	6.43807	5.78216	7.23609	6.24221	6.92509	5.94448	6.18835	6.41085	6.0482	5.72195	6.58369	6.54639	6.14797	1.1506	1.14408	1.07445	0.202391	0.194193	0.103604	0.0721492	0.040689	0.100389	0.0328143
sp|O15145|ARPC3_HUMAN	ARPC3	ARPC3_HUMAN Actin-related protein 2/3 complex subunit 3	15	5.71783	6.46737	5.05846	5.75348	6.4304	6.97093	6.37171	6.74298	6.68447	6.64773	6.54147	6.4363	6.35303	5.82034	6.24832	5.75518	5.74928	6.62901	6.57749	6.04422	1.15301	1.14405	1.0513	0.20541	0.194155	0.072173	0.100114	0.0422698	0.0170229	0.0496973
sp|O15258|RER1_HUMAN	RER1	RER1_HUMAN Protein RER1	3	5.60345	6.90959	4.89739	5.52718	5.69347	7.44585	5.94331	6.65852	6.82631	7.01411	6.64364	5.75576	6.20955	6.37992	6.5977	5.89425	5.7344	6.43529	6.55996	6.27036	1.12222	1.14396	1.09346	0.166361	0.194043	0.128904	0.147345	0.122469	0.0849177	0.0473375
sp|Q9Y4K4|M4K5_HUMAN	MAP4K5	M4K5_HUMAN Mitogen-activated protein kinase kinase kinase kinase 5	4	5.89879	6.55428	5.49448	5.81967	6.69706	6.99034	6.12957	6.08701	6.72225	6.53787	6.81945	7.10313	6.14476	6.31203	5.50677	5.18254	5.94181	6.476	6.79568	5.78653	1.0899	1.14371	0.973867	0.124201	0.193716	-0.038204	0.0747617	0.0681733	0.0347135	0.0918552
tr|E9PPU0|E9PPU0_HUMAN	EPPK1	E9PPU0_HUMAN Epiplakin	1	5.25274	5.90237	5.99274	6.94681	6.3079	5.71401	5.87084	7.94465	5.32194	9.48253	6.71485	6.03686	5.69435	5.47869	5.23278	6.10595	6.02367	6.45935	6.88905	5.62794	1.07233	1.14366	0.934305	0.100747	0.193662	-0.0980339	0.115899	0.158157	0.264205	0.0657939
sp|Q9BQ13|KCD14_HUMAN	KCTD14	KCD14_HUMAN BTB/POZ domain-containing protein KCTD14	1	6.30851	5.78006	5.93113	5.73884	6.33267	7.846	5.19913	5.39027	6.98223	6.88787	6.66688	6.63431	6.30752	6.57183	6.00255	5.42019	5.93963	6.19202	6.79282	6.07552	1.04249	1.14364	1.02288	0.0600353	0.193637	0.0326342	0.0436791	0.19523	0.0249102	0.0814664
sp|Q9NRW7|VPS45_HUMAN	VPS45	VPS45_HUMAN Vacuolar protein sorting-associated protein 45	17	5.60432	6.31183	5.65324	5.77811	6.50527	7.24339	6.23045	6.26294	6.98815	6.67939	6.43569	6.59495	6.18555	5.93035	5.92584	5.67053	5.83687	6.56051	6.67455	5.92807	1.12398	1.14351	1.01562	0.168612	0.193473	0.0223657	0.0556773	0.0718655	0.0347898	0.0354692
sp|Q8TBC4|UBA3_HUMAN	UBA3	UBA3_HUMAN NEDD8-activating enzyme E1 catalytic subunit	25	5.69808	6.23013	5.56888	5.97301	6.56407	6.79618	6.19767	6.42038	7.56214	6.35471	6.46394	6.45645	6.20579	5.74425	6.02917	5.73515	5.86753	6.49457	6.70931	5.92859	1.10687	1.14347	1.01041	0.146483	0.193412	0.0149369	0.0502223	0.0386936	0.0850657	0.038753
sp|Q9NS23|RASF1_HUMAN	RASSF1	RASF1_HUMAN Ras association domain-containing protein 1	1	5.73782	6.09458	5.40268	5.95695	6.40565	6.46521	6.82804	6.61794	6.64	6.06752	6.26802	7.53958	6.6142	6.03752	5.83145	5.49285	5.79801	6.57921	6.62878	5.99401	1.13474	1.14329	1.0338	0.182357	0.193186	0.0479631	0.0520404	0.0286426	0.0983409	0.0784954
sp|Q69YL0|YC029_HUMAN		YC029_HUMAN Uncharacterized protein DKFZp762I1415	1	6.07553	5.61426	4.264	7.65916	5.96536	6.39432	6.25921	6.45194	6.0768	6.38659	7.68712	6.84571	6.55206	5.56843	6.50162	5.69789	5.90324	6.26771	6.74906	6.08	1.06174	1.14328	1.02994	0.0864315	0.193179	0.0425649	0.23723	0.0346454	0.10381	0.0853741
sp|Q96L50|LLR1_HUMAN	LRR1	LLR1_HUMAN Leucine-rich repeat protein 1	2	5.41143	7.47585	5.88858	5.34283	7.02341	7.13958	6.26323	5.99708	7.2856	7.30567	6.59443	6.38521	5.66573	5.26243	6.02496	4.93396	6.02967	6.60583	6.89273	5.47177	1.09555	1.14313	0.907474	0.131659	0.192995	-0.140072	0.164885	0.0850621	0.0686353	0.0867981
tr|B4DEK4|B4DEK4_HUMAN	SNX2	B4DEK4_HUMAN Sorting nexin-2	1	4.82432	5.27518	5.82131	6.17289	6.92096	6.60686	6.81392	5.56722	7.34952	6.15568	6.01962	5.72945	6.25715	7.338	6.9997	6.14821	5.52342	6.47724	6.31357	6.68576	1.17269	1.14305	1.21044	0.229816	0.192892	0.27553	0.107664	0.0958019	0.112954	0.08621
sp|Q9Y4U1|MMAC_HUMAN	MMACHC	MMAC_HUMAN Methylmalonic aciduria and homocystinuria type C protein	4	5.85107	5.62168	5.83976	5.84331	6.23396	6.20229	6.25186	7.55079	7.2683	5.75788	6.9014	6.53806	6.11079	5.75277	5.81913	6.45697	5.78895	6.55972	6.61641	6.03491	1.13314	1.14294	1.04249	0.180332	0.192746	0.0600305	0.019281	0.100771	0.0975363	0.0532707
sp|Q8IZ52|CHSS2_HUMAN	CHPF	CHSS2_HUMAN Chondroitin sulfate synthase 2	6	5.58247	6.39941	5.7634	5.86384	6.61769	7.59751	6.21146	6.19539	6.82639	6.98734	6.81328	6.35301	5.69073	6.00888	5.93464	5.15455	5.90228	6.65551	6.745	5.6972	1.12762	1.14278	0.965254	0.173277	0.192547	-0.0510193	0.0595151	0.0988195	0.040482	0.0678317
sp|Q9UBH6|XPR1_HUMAN	XPR1	XPR1_HUMAN Xenotropic and polytropic retrovirus receptor 1	2	5.6313	7.05153	5.03896	5.71599	6.75426	6.95874	5.84699	6.79294	6.26212	6.94165	7.42256	6.15713	6.10482	5.49499	6.20013	5.62591	5.85944	6.58823	6.69586	5.85646	1.12438	1.14275	0.999491	0.169127	0.192506	-0.000734529	0.145045	0.0762053	0.089061	0.0594455
sp|Q9UBZ4|APEX2_HUMAN	APEX2	APEX2_HUMAN DNA-(apurinic or apyrimidinic site) lyase 2	5	5.11074	6.0526	6.04594	6.42041	6.05991	6.80782	6.28282	6.10106	6.83139	6.68824	6.79024	6.6912	6.19986	6.03767	6.11168	5.76843	5.90742	6.3129	6.75027	6.02941	1.06864	1.14268	1.02065	0.0957747	0.192416	0.029488	0.094661	0.0544703	0.0106536	0.0308803
sp|Q05469|LIPS_HUMAN	LIPE	LIPS_HUMAN Hormone-sensitive lipase	1	5.20326	6.16351	5.63546	6.78531	5.89982	6.59979	5.83497	5.66441	6.48792	5.23836	7.32309	8.12982	6.50905	5.99144	7.25723	5.27658	5.94688	5.99975	6.7948	6.25857	1.00889	1.14258	1.05241	0.0127676	0.192296	0.0737	0.114866	0.068697	0.181804	0.133546
sp|Q9UKM7|MA1B1_HUMAN	MAN1B1	MA1B1_HUMAN Endoplasmic reticulum mannosyl-oligosaccharide 1,2-alpha-mannosidase	8	5.83995	6.4479	5.31298	5.66751	6.42781	7.24601	6.33909	6.25092	6.54112	6.90091	6.85155	6.2915	5.94047	5.96743	6.18318	5.79169	5.81708	6.56596	6.64627	5.97069	1.12874	1.14254	1.02641	0.174709	0.192249	0.0376019	0.0815395	0.0699188	0.042901	0.0270263
sp|Q9UI12|VATH_HUMAN	ATP6V1H	VATH_HUMAN V-type proton ATPase subunit H	13	5.86611	6.34553	5.70909	5.803	6.72498	6.74408	6.35583	6.39948	6.85894	6.65167	6.64535	6.94859	6.04214	5.87436	5.73535	5.29549	5.93093	6.55609	6.77614	5.73684	1.10541	1.14251	0.967274	0.144577	0.192204	-0.0480039	0.0478554	0.0315673	0.0224125	0.0557537
sp|Q99675|CGRF1_HUMAN	CGRRF1	CGRF1_HUMAN Cell growth regulator with RING finger domain protein 1	2	5.97104	6.36115	6.01425	5.73644	6.63138	5.90928	5.80266	5.67629	6.28426	5.48974	7.2736	8.46558	5.33514	6.94435	6.33281	5.77203	6.02072	6.0049	6.8783	6.09608	0.997373	1.14244	1.01252	-0.0037952	0.192115	0.0179464	0.0428011	0.0713369	0.186877	0.114423
sp|Q9UHE8|STEA1_HUMAN	STEAP1	STEA1_HUMAN Metalloreductase STEAP1	2	5.72304	6.78647	5.48477	6.14186	6.24307	7.13153	6.07529	6.01529	7.2397	7.20979	6.64745	6.47293	6.11183	5.69175	5.62474	5.40049	6.03404	6.3663	6.89247	5.7072	1.05506	1.14227	0.945835	0.0773309	0.191897	-0.0803393	0.0945365	0.0815521	0.0566461	0.0520599
sp|P51797-5|CLCN6_HUMAN	CLCN6	CLCN6_HUMAN Isoform 5 of Chloride transport protein 6	1	4.61622	5.69919	5.59075	5.47685	6.37669	7.0698	7.39993	5.96228	5.45448	5.37044	6.29113	7.30117	7.15853	7.5523	6.50143	6.1788	5.34575	6.70218	6.10431	6.84776	1.25374	1.1419	1.28097	0.326236	0.191434	0.35724	0.092551	0.097285	0.147383	0.090823
sp|P61201-2|CSN2_HUMAN	COPS2	CSN2_HUMAN Isoform 2 of COP9 signalosome complex subunit 2	21	5.62732	6.3902	5.46761	5.63847	6.6727	7.31173	6.61932	6.61333	6.76958	6.655	6.65396	6.32618	5.93308	5.95452	5.87027	5.49674	5.7809	6.80427	6.60118	5.81365	1.17703	1.14189	1.00567	0.235146	0.19143	0.00815072	0.0715512	0.0498742	0.0289637	0.0368578
sp|Q8WZ82|OVCA2_HUMAN	OVCA2	OVCA2_HUMAN Ovarian cancer-associated gene 2 protein	6	5.75042	6.79783	5.58295	5.94849	6.89346	7.40091	6.71819	6.68039	6.64892	6.67718	7.38857	6.78159	5.4755	4.80275	5.51643	4.9364	6.01992	6.92324	6.87406	5.18277	1.15005	1.14189	0.860936	0.201702	0.191419	-0.216022	0.0896519	0.0479113	0.0505839	0.0706419
sp|Q5TH69|BIG3_HUMAN	ARFGEF3	BIG3_HUMAN Brefeldin A-inhibited guanine nucleotide-exchange protein 3	1	5.38597	5.43888	6.69382	6.12029	6.04756	5.45104	6.58918	6.30261	5.76664	6.95315	8.0885	6.18153	6.24681	6.79668	5.88843	6.04891	5.90974	6.0976	6.74746	6.24521	1.03179	1.14175	1.05677	0.0451463	0.191249	0.0796548	0.105001	0.0794577	0.151211	0.0633749
sp|P10746|HEM4_HUMAN	UROS	HEM4_HUMAN Uroporphyrinogen-III synthase	3	5.70781	6.25255	5.22844	6.30643	6.52929	6.79683	6.76406	6.34539	6.25796	6.58544	7.23188	6.74221	6.17747	5.53195	5.50047	6.04184	5.87381	6.60889	6.70437	5.81293	1.12515	1.1414	0.989636	0.170113	0.190806	-0.0150298	0.0865119	0.0321179	0.0604727	0.0597476
sp|Q9UK58|CCNL1_HUMAN	CCNL1	CCNL1_HUMAN Cyclin-L1	1	4.83335	5.69479	5.90173	6.77673	6.41189	5.94535	7.05627	6.97017	5.24246	9.71462	5.84028	5.68754	7.31821	4.49997	4.99973	7.10691	5.80165	6.59592	6.62123	5.9812	1.1369	1.14127	1.03095	0.185111	0.190635	0.0439729	0.137526	0.0787342	0.313809	0.240587
sp|Q12965|MYO1E_HUMAN	MYO1E	MYO1E_HUMAN Unconventional myosin-Ie	21	5.50065	6.3852	5.59002	5.9533	6.96666	6.85567	6.20777	6.36366	6.35181	7.03633	6.66813	6.68048	5.89681	5.90558	6.00351	5.63441	5.85729	6.59844	6.68419	5.86008	1.12653	1.14117	1.00048	0.171891	0.190518	0.000685803	0.068754	0.0559917	0.0418499	0.0269669
sp|Q5SRH9|TT39A_HUMAN	TTC39A	TT39A_HUMAN Tetratricopeptide repeat protein 39A	2	4.9676	7.25386	5.68893	6.57325	6.03051	6.13723	6.95354	6.20364	7.01224	6.84123	7.43644	6.64727	4.90209	5.53114	6.2581	5.56295	6.12091	6.33123	6.9843	5.56357	1.03436	1.14106	0.908945	0.0487397	0.190368	-0.137735	0.163508	0.0664892	0.0481492	0.0995889
sp|P11413-2|G6PD_HUMAN	G6PD	G6PD_HUMAN Isoform Long of Glucose-6-phosphate 1-dehydrogenase	61	5.72034	6.41439	5.34811	5.79003	7.02075	7.0504	6.40237	6.54028	6.96817	6.68218	6.44337	6.45335	6.21628	5.71615	5.92451	5.30932	5.81822	6.75345	6.63677	5.79157	1.16074	1.14069	0.995419	0.215047	0.189904	-0.00662398	0.076014	0.0489855	0.0372075	0.0658474
sp|Q96E29|MTER1_HUMAN	MTERFD1	MTER1_HUMAN mTERF domain-containing protein 1, mitochondrial	15	5.95831	6.53232	5.29864	5.61329	6.50755	6.87785	6.33076	6.39891	6.69797	7.01525	6.56903	6.41044	6.21634	5.88968	6.07988	5.60377	5.85064	6.52877	6.67317	5.94742	1.11591	1.14059	1.01654	0.158216	0.189778	0.0236689	0.0902987	0.0373491	0.0384501	0.0446224
sp|Q96FK6|WDR89_HUMAN	WDR89	WDR89_HUMAN WD repeat-containing protein 89	5	5.48603	6.36129	5.48692	6.02635	6.66247	6.20289	6.0629	5.93217	6.32632	7.71281	6.0402	6.56413	6.88063	5.94302	5.91871	6.39315	5.84015	6.21511	6.66086	6.28388	1.0642	1.14053	1.07598	0.0897745	0.189705	0.10565	0.073743	0.0511767	0.110088	0.0722038
sp|Q14147|DHX34_HUMAN	DHX34	DHX34_HUMAN Probable ATP-dependent RNA helicase DHX34	6	5.95179	6.18563	5.74382	6.04243	7.03387	7.20124	6.52903	6.22779	6.4223	6.84156	7.09401	6.92335	5.90968	5.70929	5.33168	4.85252	5.98092	6.74798	6.82031	5.45079	1.12825	1.14034	0.911364	0.174089	0.189469	-0.133901	0.0309437	0.0665885	0.0418485	0.085364
sp|Q8WXI4|ACO11_HUMAN	ACOT11	ACO11_HUMAN Acyl-coenzyme A thioesterase 11	13	5.49008	6.26686	5.49338	6.24993	7.02725	7.03187	6.4038	6.61263	6.53664	6.71208	6.73423	6.81466	6.15814	5.35025	5.76959	5.34863	5.87506	6.76889	6.6994	5.65665	1.15214	1.14031	0.962824	0.204315	0.189428	-0.0546557	0.0753507	0.0462181	0.0174818	0.068696
sp|Q7Z3V4|UBE3B_HUMAN	UBE3B	UBE3B_HUMAN Ubiquitin-protein ligase E3B	3	5.45549	6.40779	5.73793	6.39255	6.28162	6.82592	5.75873	6.33375	6.11712	6.74625	6.69382	7.78733	5.96537	5.9454	5.77196	5.77896	5.99844	6.30001	6.83613	5.86542	1.05027	1.13965	0.977825	0.0707656	0.188592	-0.0323523	0.0796931	0.069252	0.101701	0.0177717
sp|Q9Y3Q3|TMED3_HUMAN	TMED3	TMED3_HUMAN Transmembrane emp24 domain-containing protein 3	5	5.62791	6.17346	5.84221	5.88655	6.78708	6.9449	6.28755	6.22677	6.93347	6.45005	6.74781	6.67966	5.96913	6.0402	5.73276	5.67048	5.88253	6.56157	6.70275	5.85314	1.11543	1.13943	0.995004	0.157605	0.188315	-0.00722598	0.0381528	0.0545943	0.0297953	0.0306102
sp|O15287|FANCG_HUMAN	FANCG	FANCG_HUMAN Fanconi anemia group G protein	10	5.74986	6.99193	5.19035	5.67355	6.74284	6.97931	5.6001	6.27466	7.01317	6.52146	6.68152	6.68018	6.12264	5.96678	5.8533	5.95837	5.90142	6.39923	6.72408	5.97527	1.08435	1.1394	1.01251	0.116835	0.188275	0.0179418	0.130148	0.0949984	0.0307632	0.0185739
sp|Q9NWS8|RMND1_HUMAN	RMND1	RMND1_HUMAN Required for meiotic nuclear division protein 1 homolog	7	5.619	6.16248	5.45348	5.73679	6.29746	6.79592	5.98165	6.60289	6.82664	6.31484	6.53517	6.49443	6.2453	5.95696	6.5868	6.39019	5.74294	6.41948	6.54277	6.29481	1.1178	1.13927	1.0961	0.160668	0.188113	0.132375	0.0527387	0.0555817	0.0324138	0.0421256
sp|Q9P0J7|KCMF1_HUMAN	KCMF1	KCMF1_HUMAN E3 ubiquitin-protein ligase KCMF1	1	5.46341	5.52327	5.83102	5.73641	6.01162	7.2762	5.28063	5.73395	7.68826	5.2571	6.78111	5.96637	7.34251	7.20938	6.94028	5.9585	5.63853	6.0756	6.42321	6.86267	1.07752	1.13916	1.2171	0.107708	0.187976	0.283451	0.0308178	0.140764	0.163209	0.091155
sp|P22830-2|HEMH_HUMAN	FECH	HEMH_HUMAN Isoform 2 of Ferrochelatase, mitochondrial	16	5.85555	5.84761	5.7245	6.00822	6.79669	6.77258	6.34144	6.31716	6.94799	6.77729	6.40219	6.56815	6.27619	5.80967	5.87137	5.68339	5.85897	6.55697	6.6739	5.91015	1.11913	1.13909	1.00874	0.162382	0.187884	0.0125489	0.0198307	0.0401495	0.0357548	0.043359
sp|Q96BN2|TADA1_HUMAN	TADA1	TADA1_HUMAN Transcriptional adapter 1	2	6.22194	5.93843	6.17586	5.59382	6.39524	6.49445	6.21327	5.64382	6.96352	6.66738	7.56013	6.0668	5.84012	6.7569	5.98675	5.48158	5.98251	6.1867	6.81446	6.01634	1.03413	1.13906	1.00565	0.0484174	0.187847	0.00813399	0.048034	0.0614522	0.0912065	0.0893198
sp|Q9NX47|MARH5_HUMAN	2021-03-05	MARH5_HUMAN E3 ubiquitin-protein ligase MARCH5	7	5.3846	5.83705	5.96379	6.36303	6.58106	6.62145	6.26647	6.204	6.56396	6.72002	6.83898	6.69858	6.07563	6.1853	5.66616	6.02991	5.88712	6.41825	6.70538	5.98925	1.09022	1.13899	1.01735	0.124617	0.187759	0.0248139	0.0684668	0.0332634	0.0168086	0.037575
sp|Q9HBI1-2|PARVB_HUMAN	PARVB	PARVB_HUMAN Isoform 2 of Beta-parvin	7	5.62187	6.63966	5.48112	5.71349	6.62193	7.0834	6.33232	6.43296	7.14813	6.60011	6.42299	6.54325	6.11422	5.76769	6.10869	5.36816	5.86404	6.61765	6.67862	5.83969	1.12852	1.13891	0.995848	0.174426	0.187656	-0.00600193	0.0896722	0.0503047	0.0481533	0.0605635
sp|Q5JWF2-2|GNAS1_HUMAN	GNAS	GNAS1_HUMAN Isoform XLas-2 of Guanine nucleotide-binding protein G(s) subunit alpha isoforms XLas	1	5.62326	6.41128	6.17599	5.63411	6.34329	7.84752	6.18631	6.4182	6.3826	6.92449	6.67905	7.16835	5.13571	5.5029	5.34325	6.22368	5.96116	6.69883	6.78862	5.55138	1.12375	1.13881	0.931259	0.168316	0.187526	-0.102745	0.0663912	0.115224	0.0495548	0.0851564
sp|P85298|RHG08_HUMAN	ARHGAP8	RHG08_HUMAN Rho GTPase-activating protein 8	2	6.3001	6.41514	5.12263	5.72318	7.61206	6.02569	5.06519	6.33123	6.71751	6.78202	6.81204	6.51604	6.06706	6.03797	6.37925	6.0929	5.89026	6.25854	6.7069	6.14429	1.06252	1.13864	1.04313	0.0874948	0.187315	0.0609156	0.100946	0.167976	0.0198622	0.0257533
sp|Q9UKT5|FBX4_HUMAN	FBXO4	FBX4_HUMAN F-box only protein 4	3	5.66003	6.05396	5.82511	5.72313	6.53112	7.29158	6.31621	6.3427	6.89809	6.8591	6.60591	6.12251	6.1553	5.81468	6.38754	5.41303	5.81556	6.6204	6.6214	5.94264	1.1384	1.13857	1.02185	0.187001	0.187219	0.0311859	0.0297265	0.0691147	0.053905	0.0713946
sp|Q8IUQ4-2|SIAH1_HUMAN	SIAH1	SIAH1_HUMAN Isoform 2 of E3 ubiquitin-protein ligase SIAH1	1	5.78581	5.86653	6.38597	5.07034	5.23569	6.65894	7.24245	6.50233	6.95215	6.08588	6.68804	6.57545	6.15218	5.83139	6.96112	6.00574	5.77716	6.40985	6.57538	6.23761	1.10952	1.13817	1.0797	0.14993	0.186713	0.110632	0.0936586	0.131841	0.0551326	0.0801345
sp|Q9H902-3|REEP1_HUMAN	REEP1	REEP1_HUMAN Isoform 3 of Receptor expression-enhancing protein 1	1	7.0345	5.45189	4.71928	6.17895	6.88447	5.90672	5.15414	6.46047	6.4612	6.10741	7.7963	6.25009	6.42543	6.51309	5.95345	6.70261	5.84616	6.10145	6.65375	6.39865	1.04367	1.13814	1.0945	0.0616641	0.18668	0.130278	0.16957	0.122551	0.116542	0.0497828
sp|Q14739|LBR_HUMAN	LBR	LBR_HUMAN Lamin-B receptor	12	5.84589	6.74585	5.53764	5.59554	6.90801	7.63834	6.65433	6.77042	6.7309	7.04144	6.68217	6.54678	5.35227	5.66863	5.51368	4.7681	5.93123	6.99277	6.75032	5.32567	1.17898	1.1381	0.897903	0.237534	0.186625	-0.155368	0.0942995	0.0633069	0.0309801	0.0738902
sp|P55212|CASP6_HUMAN	CASP6	CASP6_HUMAN Caspase-6	10	6.03278	6.36493	5.46064	6.00617	6.66869	6.62248	6.11254	6.30114	6.75845	6.55811	6.90923	6.93331	6.20144	5.81718	5.66014	5.5928	5.96613	6.42621	6.78977	5.81789	1.07712	1.13805	0.975153	0.107173	0.186568	-0.0362994	0.0627603	0.0413033	0.0254418	0.046827
sp|Q9Y512|SAM50_HUMAN	SAMM50	SAM50_HUMAN Sorting and assembly machinery component 50 homolog	23	5.61582	6.02814	5.47435	6.20513	6.36072	6.75612	6.12511	6.13817	6.93808	6.51514	6.40145	6.68852	6.31974	6.09058	6.41583	5.9271	5.83086	6.34503	6.6358	6.18831	1.08818	1.13805	1.0613	0.121918	0.186561	0.0858374	0.0587743	0.0464327	0.0351949	0.0357488
sp|O60783|RT14_HUMAN	MRPS14	RT14_HUMAN 28S ribosomal protein S14, mitochondrial	4	5.93316	6.67222	5.26409	5.81818	7.05287	6.66202	6.09324	6.4377	6.71164	6.83343	6.82596	6.58032	6.22558	5.85721	5.57632	5.45605	5.92191	6.56146	6.73784	5.77879	1.108	1.13778	0.975832	0.147953	0.186222	-0.0352957	0.0978141	0.0613509	0.0176445	0.0591848
sp|Q9Y6N5|SQRD_HUMAN	SQRDL	SQRD_HUMAN Sulfide:quinone oxidoreductase, mitochondrial	21	5.65254	6.31162	5.53648	5.82963	6.27739	6.87636	6.08413	6.35993	6.84412	6.85035	6.3607	6.48695	6.3599	6.03069	6.15952	5.97968	5.83257	6.39945	6.63553	6.13245	1.09719	1.13767	1.05141	0.133817	0.186081	0.0723319	0.0585263	0.0528631	0.0376523	0.0276349
sp|Q52LR7|EPC2_HUMAN	EPC2	EPC2_HUMAN Enhancer of polycomb homolog 2	3	6.13308	5.76908	7.87447	6.30075	5.8516	6.08458	5.61899	4.98873	4.9165	11.9415	6.53436	6.27012	4.87947	5.80549	5.89434	5.13695	6.51934	5.63598	7.41562	5.42906	0.8645	1.13748	0.832762	-0.210062	0.18584	-0.264024	0.142695	0.0836601	0.417949	0.0918241
sp|O95352|ATG7_HUMAN	ATG7	ATG7_HUMAN Ubiquitin-like modifier-activating enzyme ATG7	17	5.78239	6.40519	5.92111	5.74156	6.91375	7.09677	6.59072	6.20132	6.63107	6.81593	6.75787	6.92347	5.89802	5.42945	5.82116	5.07022	5.96256	6.70064	6.78209	5.55471	1.12379	1.13744	0.931598	0.168366	0.185796	-0.10222	0.0511403	0.0586758	0.0179634	0.0688886
sp|Q99551|MTERF_HUMAN	MTERF	MTERF_HUMAN Transcription termination factor, mitochondrial	1	5.85482	5.56603	5.23744	6.25907	7.28332	6.79701	6.26076	6.90201	6.67511	6.53853	5.85998	6.99187	6.98418	5.27032	6.01894	5.5006	5.72934	6.81078	6.51637	5.94351	1.18875	1.13737	1.03738	0.24945	0.1857	0.0529462	0.0757455	0.0619651	0.0732029	0.128064
sp|P36952|SPB5_HUMAN	SERPINB5	SPB5_HUMAN Serpin B5	33	5.79811	6.45978	5.56177	5.79127	6.63549	6.57462	6.22597	6.41934	6.5736	7.56659	6.48337	6.22324	6.23243	5.72107	6.1052	5.62817	5.90273	6.46386	6.7117	5.92172	1.09506	1.13705	1.00322	0.131012	0.185295	0.0046327	0.0656081	0.0282875	0.0877519	0.0493915
sp|Q9UKT8|FBXW2_HUMAN	FBXW2	FBXW2_HUMAN F-box/WD repeat-containing protein 2	1	6.04039	6.15965	5.62836	6.39702	5.82227	5.48992	6.52519	6.67367	6.89669	8.05815	5.77397	6.81562	6.74767	4.98373	5.05058	6.93712	6.05636	6.12776	6.88611	5.92978	1.01179	1.13701	0.9791	0.0169106	0.185239	-0.0304724	0.0530908	0.092129	0.135598	0.178251
sp|Q86WA9|S2611_HUMAN	SLC26A11	S2611_HUMAN Sodium-independent sulfate anion transporter	1	5.39139	5.78897	5.90546	6.09087	6.38005	7.04211	6.54153	6.37463	6.62877	6.60322	6.09034	7.0233	6.22225	5.98868	5.86424	6.06418	5.79417	6.58458	6.58641	6.03484	1.13641	1.13673	1.04154	0.184489	0.184889	0.0587123	0.051069	0.0477927	0.0580819	0.0248038
sp|Q14139-2|UBE4A_HUMAN	UBE4A	UBE4A_HUMAN Isoform 2 of Ubiquitin conjugation factor E4 A	24	5.79831	6.2357	5.29589	6.00483	6.50098	6.95284	6.47355	6.55178	6.83444	6.50982	6.55522	6.6207	6.04627	5.87775	5.96442	5.7775	5.83368	6.61979	6.63004	5.91648	1.13475	1.13651	1.01419	0.182378	0.184612	0.0203335	0.0686659	0.0338965	0.0216685	0.0195067
sp|Q9BY78|RNF26_HUMAN	RNF26	RNF26_HUMAN RING finger protein 26	1	6.19655	7.37381	5.89547	5.4159	7.10298	7.54361	6.05304	5.5072	7.51448	7.35267	6.85658	6.55228	4.9283	5.80044	5.2096	4.6971	6.22043	6.55171	7.069	5.15886	1.05326	1.13642	0.829341	0.0748561	0.184492	-0.269963	0.13398	0.14284	0.06279	0.0923262
sp|Q96E16|SMI19_HUMAN	SMIM19	SMI19_HUMAN Small integral membrane protein 19	1	4.92107	5.0403	5.87273	6.30949	5.53589	6.40139	5.8046	6.94713	5.50515	6.36978	5.13732	8.1506	7.77179	6.76042	6.75508	6.71726	5.5359	6.17225	6.29071	7.00114	1.11495	1.13635	1.26468	0.15698	0.184406	0.338772	0.120525	0.102171	0.213527	0.0734348
sp|P19474|RO52_HUMAN	TRIM21	RO52_HUMAN E3 ubiquitin-protein ligase TRIM21	9	5.64979	6.0719	5.92635	5.97029	6.74435	6.51485	6.46473	6.24617	6.95093	6.61272	6.84744	6.42724	6.04042	5.8205	6.13603	5.57629	5.90458	6.49252	6.70958	5.89331	1.09957	1.13633	0.998091	0.136945	0.184388	-0.0027569	0.030564	0.0314873	0.0350961	0.0422915
sp|Q3B726|RPA43_HUMAN	TWISTNB	RPA43_HUMAN DNA-directed RNA polymerase I subunit RPA43	3	5.27402	6.85866	5.11176	5.96682	6.66656	7.01355	6.2274	6.82126	6.67633	6.11885	6.43743	7.14221	6.11193	5.77191	6.01116	5.79014	5.80282	6.68219	6.5937	5.92129	1.15154	1.13629	1.02042	0.203569	0.184336	0.0291574	0.137104	0.0500992	0.0653836	0.0282485
sp|Q8WV92|MITD1_HUMAN	MITD1	MITD1_HUMAN MIT domain-containing protein 1	3	5.93062	5.99144	5.60748	6.26621	6.43663	6.2172	6.64648	5.80334	6.58464	6.7646	6.75332	6.93563	6.30305	6.08865	5.97433	5.69637	5.94894	6.27591	6.75955	6.0156	1.05496	1.13626	1.01121	0.0771932	0.184295	0.0160766	0.0454585	0.0574449	0.0212095	0.0420078
sp|Q8NE01|CNNM3_HUMAN	CNNM3	CNNM3_HUMAN Metal transporter CNNM3	15	5.83376	6.04457	5.61667	6.32215	6.31354	6.29655	6.10498	6.02448	6.78617	6.92227	6.85503	6.49816	6.0131	5.78525	6.3037	6.27962	5.95429	6.18489	6.76541	6.09542	1.03873	1.13622	1.0237	0.0548185	0.184248	0.0337962	0.0505688	0.023081	0.0275857	0.0402184
sp|A6NHL2|TBAL3_HUMAN	TUBAL3	TBAL3_HUMAN Tubulin alpha chain-like 3	1	5.58836	4.37314	7.36986	7.45839	6.75707	6.33065	5.90255	6.27424	6.70863	6.88109	7.18664	7.39036	4.56295	5.54112	5.63654	6.03842	6.19744	6.31613	7.04168	5.44476	1.01915	1.13622	0.87855	0.0273685	0.184248	-0.186804	0.240482	0.0554093	0.0433312	0.114995
sp|Q5VV41|ARHGG_HUMAN	ARHGEF16	ARHGG_HUMAN Rho guanine nucleotide exchange factor 16	14	5.64423	6.66217	5.34429	5.89761	6.99928	7.15679	6.38646	6.57902	6.95273	6.92662	6.57898	6.29767	5.87195	5.56043	5.96721	5.17455	5.88708	6.78039	6.689	5.64353	1.15174	1.13622	0.958631	0.203817	0.18424	-0.0609519	0.0958124	0.0528562	0.0465821	0.0633777
sp|Q9BZJ4|S2539_HUMAN	SLC25A39	S2539_HUMAN Solute carrier family 25 member 39	1	5.42022	5.63155	5.78334	7.28738	6.5337	6.43928	5.86925	6.29321	6.81656	7.01683	6.1706	7.40425	5.75869	5.52608	5.86461	6.18446	6.03062	6.28386	6.85206	5.83346	1.04199	1.13621	0.967306	0.0593441	0.184231	-0.0479551	0.141108	0.0467194	0.075256	0.0468677
sp|Q5SW96|ARH_HUMAN	LDLRAP1	ARH_HUMAN Low density lipoprotein receptor adapter protein 1	4	6.14598	6.39387	5.54426	6.06065	6.58688	6.83153	6.32462	6.35236	6.8723	6.41541	6.95608	7.18871	5.68869	5.41013	5.76445	5.46408	6.03619	6.52385	6.85813	5.58184	1.08079	1.13617	0.924729	0.112085	0.184176	-0.112898	0.0591615	0.0362456	0.0472546	0.0307035
sp|Q96N66|MBOA7_HUMAN	MBOAT7	MBOA7_HUMAN Lysophospholipid acyltransferase 7	8	5.88424	6.3848	5.57737	6.01322	6.72333	6.93195	6.36605	6.37812	6.96211	6.4872	7.10249	6.55057	5.934	5.586	5.50041	5.61814	5.96491	6.59986	6.77559	5.65964	1.10645	1.13591	0.948822	0.145936	0.183847	-0.0757901	0.05605	0.0418955	0.0447217	0.0334892
sp|P50995|ANX11_HUMAN	ANXA11	ANX11_HUMAN Annexin A11	33	5.76802	6.51421	5.33703	5.75744	6.87201	7.07764	6.62745	6.66145	6.94822	6.54015	6.60044	6.46459	6.0344	5.52329	6.02126	5.25241	5.84417	6.80964	6.63835	5.70784	1.1652	1.13589	0.976672	0.220579	0.183825	-0.0340545	0.0837956	0.0306712	0.0322257	0.0675779
sp|Q6P4F1-2|FUT10_HUMAN	FUT10	FUT10_HUMAN Isoform 2 of Alpha-(1,3)-fucosyltransferase 10	1	5.96306	6.38286	5.22991	6.10916	6.35147	6.73045	6.46909	6.07176	6.94096	6.60051	6.15551	7.20613	6.14918	6.02782	6.12313	5.48901	5.92125	6.40569	6.72578	5.94728	1.08181	1.13587	1.0044	0.113453	0.1838	0.00633006	0.0831993	0.0426518	0.0674792	0.0521142
sp|Q7Z736|PKHH3_HUMAN	PLEKHH3	PKHH3_HUMAN Pleckstrin homology domain-containing family H member 3	2	6.22177	5.73879	5.34255	5.58479	7.23732	6.60675	5.59235	5.19973	6.32912	5.80092	7.66687	6.19958	7.06291	6.89803	6.16304	6.35547	5.72198	6.15904	6.49912	6.61986	1.07638	1.13582	1.15692	0.106192	0.183732	0.210288	0.0648329	0.151284	0.124678	0.0648129
sp|Q8ND25-2|ZNRF1_HUMAN	ZNRF1	ZNRF1_HUMAN Isoform 2 of E3 ubiquitin-protein ligase ZNRF1	1	6.14335	6.375	4.42818	6.21808	6.30489	7.59152	7.68395	5.63286	7.55108	7.90276	4.92898	5.92676	5.54394	6.85201	6.24986	4.66677	5.79115	6.8033	6.57739	5.82814	1.17478	1.13577	1.00639	0.232385	0.183666	0.00918628	0.157786	0.147359	0.21222	0.161436
sp|P17252|KPCA_HUMAN	PRKCA	KPCA_HUMAN Protein kinase C alpha type	9	5.43615	6.76547	5.12345	6.20377	6.98502	7.07851	6.5245	6.18872	6.71954	6.56195	6.52244	6.91593	5.95754	5.57165	5.70204	5.74331	5.88221	6.69419	6.67997	5.74364	1.13804	1.13562	0.976442	0.186551	0.183482	-0.0343942	0.126393	0.0619883	0.0267776	0.0279048
sp|Q9BUP3-3|HTAI2_HUMAN	HTATIP2	HTAI2_HUMAN Isoform 3 of Oxidoreductase HTATIP2	11	5.70918	6.10957	5.6314	6.1553	6.55299	6.59362	6.17931	6.34035	6.87239	6.45931	6.62905	6.84495	6.46499	5.76945	6.14443	5.54373	5.90136	6.41657	6.70143	5.98065	1.0873	1.13557	1.01344	0.120754	0.18342	0.0192542	0.045642	0.0301203	0.0290487	0.0680505
sp|Q9NVV4|PAPD1_HUMAN	MTPAP	PAPD1_HUMAN Poly(A) RNA polymerase, mitochondrial	8	5.62286	6.39828	5.5939	5.96048	6.5518	7.19425	6.03422	6.1156	6.66658	6.88776	6.54321	6.67341	6.16198	6.00919	5.80907	5.77742	5.89388	6.47397	6.69274	5.93942	1.09842	1.13554	1.00773	0.135432	0.183379	0.0111032	0.063657	0.0820589	0.0213844	0.0303739
sp|O96013|PAK4_HUMAN	PAK4	PAK4_HUMAN Serine/threonine-protein kinase PAK 4	16	5.95757	6.19334	5.5768	5.68204	6.66742	6.87846	6.29823	6.35348	6.89246	6.59316	6.50598	6.58324	6.24527	5.89451	6.08808	5.58993	5.85244	6.5494	6.64371	5.95445	1.11909	1.1352	1.01743	0.162325	0.182951	0.02493	0.0475453	0.0416919	0.0256409	0.0473922
sp|Q9Y2H1|ST38L_HUMAN	STK38L	ST38L_HUMAN Serine/threonine-protein kinase 38-like	6	5.76982	6.2772	5.68232	6.06516	6.57923	7.00402	6.36235	6.6187	7.08587	6.83435	6.5215	6.56887	6.10966	5.50302	5.63922	5.37872	5.94862	6.64107	6.75265	5.65766	1.11641	1.13516	0.951086	0.158861	0.182897	-0.072352	0.0459795	0.0401926	0.0387038	0.0564836
sp|O60942|MCE1_HUMAN	RNGTT	MCE1_HUMAN mRNA-capping enzyme	21	5.67025	6.39086	5.49178	5.96487	6.85076	6.94324	6.38657	6.36081	6.92123	6.59301	6.63619	6.5447	6.19099	5.57029	5.90637	5.57809	5.87944	6.63535	6.67378	5.81143	1.12857	1.13511	0.988433	0.174493	0.182826	-0.0167843	0.0668101	0.0459154	0.0253447	0.0512073
sp|Q96K37|S35E1_HUMAN	SLC35E1	S35E1_HUMAN Solute carrier family 35 member E1	3	5.75493	6.20764	5.6311	6.39506	6.63238	6.93131	6.5863	6.35952	6.69852	6.78191	6.7649	6.97645	5.67659	5.71232	6.1214	4.76967	5.99718	6.62738	6.80544	5.57	1.10508	1.13477	0.928769	0.144153	0.182405	-0.106609	0.060528	0.0354761	0.0175662	0.102412
sp|Q9Y3A4|RRP7A_HUMAN	RRP7A	RRP7A_HUMAN Ribosomal RNA-processing protein 7 homolog A	4	5.87096	7.10331	5.77989	5.54171	5.80591	7.24635	6.24504	5.98521	6.55522	8.01163	6.04802	6.95415	5.90418	6.37967	5.58806	4.98071	6.07397	6.32063	6.89226	5.71316	1.04061	1.13472	0.940597	0.0574286	0.182337	-0.0883515	0.115267	0.101721	0.120904	0.102703
sp|Q96H55|MYO19_HUMAN	MYO19	MYO19_HUMAN Unconventional myosin-XIX	3	5.43821	6.57283	5.43083	5.84683	7.44346	7.36762	5.77759	7.0485	7.72016	6.56236	6.38002	5.76155	6.06168	5.71325	5.25706	5.61804	5.82218	6.90929	6.60602	5.66251	1.18672	1.13463	0.972576	0.24698	0.182224	-0.0401171	0.0922103	0.11197	0.123828	0.0584187
sp|Q66K74|MAP1S_HUMAN	MAP1S	MAP1S_HUMAN Microtubule-associated protein 1S	24	5.81496	6.23408	5.56269	5.88124	6.77472	7.51991	6.38412	6.41224	6.88311	6.75255	6.51091	6.50295	6.13765	5.63988	5.69849	5.2905	5.87324	6.77275	6.66238	5.69163	1.15315	1.13436	0.969078	0.205584	0.18188	-0.0453153	0.0471549	0.0780946	0.028109	0.0610795
sp|Q8IWB1|IPRI_HUMAN	ITPRIP	IPRI_HUMAN Inositol 1,4,5-trisphosphate receptor-interacting protein	3	5.73741	6.51616	5.5159	6.42233	6.81911	6.61154	5.75416	6.45827	6.91722	6.69721	6.69633	7.13029	5.51714	5.83361	5.71707	5.65626	6.04795	6.41077	6.86026	5.68102	1.05999	1.13431	0.93933	0.0840514	0.181818	-0.0902962	0.0820582	0.0720725	0.0302993	0.0231865
sp|Q5VW32|BROX_HUMAN	BROX	BROX_HUMAN BRO1 domain-containing protein BROX	9	5.7181	6.51033	5.52735	5.97903	6.57722	6.71307	6.3212	6.43476	6.84279	6.61925	6.7659	6.69455	6.34594	5.58025	5.94869	5.42156	5.9337	6.51156	6.73062	5.82411	1.09739	1.1343	0.981531	0.134071	0.181807	-0.026895	0.0719074	0.0261605	0.014233	0.070748
sp|Q86TS9|RM52_HUMAN	MRPL52	RM52_HUMAN 39S ribosomal protein L52, mitochondrial	4	5.99035	6.54035	5.63584	6.35456	5.82781	7.31746	6.83372	6.68608	6.79486	7.25105	7.62151	6.14536	4.72436	5.55543	5.24322	5.47803	6.13027	6.66627	6.9532	5.25026	1.08743	1.13424	0.856448	0.120927	0.181724	-0.223563	0.0654203	0.0930981	0.0914515	0.0714041
sp|Q6NUI2-4|GPAT2_HUMAN	GPAT2	GPAT2_HUMAN Isoform 3 of Glycerol-3-phosphate acyltransferase 2, mitochondrial	5	5.60056	6.29516	5.73212	5.73533	6.62832	6.94868	6.25542	6.32093	6.75297	6.51719	6.81603	6.41211	5.80097	6.31908	6.05286	5.81226	5.84079	6.53834	6.62458	5.99629	1.11943	1.13419	1.02662	0.16276	0.181664	0.0379066	0.0529638	0.0486694	0.0288808	0.0407831
sp|Q8N668|COMD1_HUMAN	COMMD1	COMD1_HUMAN COMM domain-containing protein 1	4	5.64528	5.94955	5.7585	6.20388	6.18481	7.06517	5.82386	6.03108	7.18951	6.45935	6.25079	6.81842	5.85434	5.96991	6.52418	6.27136	5.8893	6.27623	6.67952	6.15495	1.0657	1.13418	1.04511	0.0918014	0.181647	0.0636498	0.0415049	0.0870519	0.0618284	0.0491447
sp|Q8WVM8|SCFD1_HUMAN	SCFD1	SCFD1_HUMAN Sec1 family domain-containing protein 1	34	5.6717	6.01701	5.55731	5.85869	6.72023	7.08869	6.37515	6.60556	6.83001	6.44988	6.41934	6.50433	6.46576	6.04535	5.92845	5.46251	5.77618	6.69741	6.55089	5.97552	1.15949	1.13412	1.03451	0.213488	0.181576	0.0489486	0.0351444	0.0444528	0.0289077	0.069041
sp|Q96T76-8|MMS19_HUMAN	MMS19	MMS19_HUMAN Isoform 5 of MMS19 nucleotide excision repair protein homolog	29	5.71217	6.45678	5.52895	5.77317	6.66727	7.16695	6.37469	6.46761	6.91994	6.72032	6.40305	6.57541	5.94216	5.93708	5.84372	5.51072	5.86777	6.66913	6.65468	5.80842	1.13657	1.13411	0.989886	0.184687	0.181558	-0.0146659	0.0692184	0.0530229	0.0329537	0.0350458
sp|Q5T160|SYRM_HUMAN	RARS2	SYRM_HUMAN Probable arginine--tRNA ligase, mitochondrial	9	5.63838	6.72809	5.39229	5.99627	6.29237	6.76565	6.17909	6.73002	6.77642	6.83833	6.55352	6.76761	5.95651	5.54399	6.18201	5.65945	5.93876	6.49178	6.73397	5.83549	1.09312	1.1339	0.982611	0.128454	0.181296	-0.0253073	0.0979537	0.0461525	0.0184657	0.0495365
sp|Q8NE62|CHDH_HUMAN	CHDH	CHDH_HUMAN Choline dehydrogenase, mitochondrial	4	5.62725	6.3156	5.75213	5.70023	6.84022	6.9005	6.38175	6.39085	6.83829	6.33166	6.59872	6.75868	6.30369	5.75845	6.13606	5.36591	5.8488	6.62833	6.63184	5.89103	1.13328	1.13388	1.00722	0.180504	0.181267	0.010378	0.0539232	0.0423301	0.0337076	0.0709205
sp|Q96DA6|TIM14_HUMAN	DNAJC19	TIM14_HUMAN Mitochondrial import inner membrane translocase subunit TIM14	5	5.79953	6.46519	5.16558	5.49509	6.44936	7.11945	6.486	6.29677	6.90382	6.67331	6.17251	6.24328	6.44077	6.08282	6.3985	5.80802	5.73135	6.58789	6.49823	6.18253	1.14945	1.1338	1.07872	0.200943	0.181172	0.109322	0.096574	0.0552105	0.0537691	0.047939
sp|P57088|TMM33_HUMAN	TMEM33	TMM33_HUMAN Transmembrane protein 33	24	5.77983	6.4807	5.62124	5.70737	6.80349	7.52926	6.51971	6.65379	6.84668	7.0266	6.48525	6.38371	5.66976	5.64657	5.60354	5.24251	5.89729	6.87656	6.68556	5.54059	1.16606	1.13367	0.939516	0.221637	0.180997	-0.09001	0.0668627	0.0654841	0.0451632	0.036207
sp|Q9H1P3|OSBL2_HUMAN	OSBPL2	OSBL2_HUMAN Oxysterol-binding protein-related protein 2	8	5.47976	6.4799	5.52031	6.24198	6.75433	6.90958	5.96672	6.57938	7.26981	6.7065	6.48025	6.43369	6.15924	5.63628	5.95586	5.4264	5.93049	6.5525	6.72256	5.79445	1.10488	1.13356	0.97706	0.143895	0.180861	-0.0334802	0.0854425	0.0630537	0.0570909	0.0563292
sp|Q6PFW1|VIP1_HUMAN	PPIP5K1	VIP1_HUMAN Inositol hexakisphosphate and diphosphoinositol-pentakisphosphate kinase 1	13	5.79629	6.08708	5.77021	5.80228	6.60876	7.19855	6.24352	6.33565	6.86265	6.72389	6.33388	6.66606	6.03363	6.04163	5.90034	5.59559	5.86396	6.59662	6.64662	5.8928	1.12494	1.13347	1.00492	0.169851	0.180744	0.0070762	0.0254765	0.0652173	0.0337344	0.0353764
sp|A6QL63|BTBDB_HUMAN	BTBD11	BTBDB_HUMAN Ankyrin repeat and BTB/POZ domain-containing protein BTBD11	1	5.00057	6.27592	6.29141	6.79355	5.9256	6.54149	6.32799	6.37611	6.79812	6.22778	7.44278	7.14029	5.46113	5.94568	5.33775	6.11384	6.09036	6.2928	6.90224	5.7146	1.03324	1.13331	0.938302	0.0471734	0.180537	-0.0918756	0.125655	0.0415265	0.075495	0.0654016
sp|Q9UK28|TM59L_HUMAN	TMEM59L	TM59L_HUMAN Transmembrane protein 59-like	1	5.93629	5.74604	5.70696	7.4349	5.8789	6.76147	4.73163	5.29117	7.23173	6.25573	6.14817	8.49627	5.53998	6.16799	5.58303	7.08973	6.20605	5.66579	7.03298	6.09518	0.912947	1.13325	0.982136	-0.131397	0.18046	-0.0260053	0.132989	0.153154	0.155059	0.118497
sp|Q9H900|ZWILC_HUMAN	ZWILCH	ZWILC_HUMAN Protein zwilch homolog	5	5.79146	6.11264	5.35707	6.02789	6.48771	6.62814	6.45241	6.5178	6.66751	6.74648	6.71883	6.25851	6.28793	5.92866	6.22942	5.78753	5.82226	6.52152	6.59783	6.05839	1.1201	1.13321	1.04055	0.163627	0.180412	0.0573528	0.0581565	0.0116446	0.034643	0.0395382
sp|O75477|ERLN1_HUMAN	ERLIN1	ERLN1_HUMAN Erlin-1	14	5.70655	6.56462	5.38391	5.68687	6.71678	7.1811	6.29348	6.61656	6.83639	6.97974	6.24733	6.38702	6.14029	5.92097	5.75814	5.58023	5.83549	6.70198	6.61262	5.84991	1.14849	1.13317	1.00247	0.199734	0.180369	0.00356063	0.0870579	0.0547516	0.0530501	0.0407546
sp|O43826-2|G6PT1_HUMAN	SLC37A4	G6PT1_HUMAN Isoform 2 of Glucose-6-phosphate translocase	1	6.44096	6.93287	5.72548	4.89016	6.8663	6.33824	5.90977	7.28202	7.92517	6.51477	5.95987	6.78417	6.1554	5.71507	5.34556	5.2142	5.99737	6.59908	6.79599	5.60756	1.10033	1.13316	0.935003	0.137936	0.180355	-0.0969569	0.148257	0.0909638	0.121736	0.0753127
sp|Q16850|CP51A_HUMAN	CYP51A1	CP51A_HUMAN Lanosterol 14-alpha demethylase	13	5.68067	6.42246	5.2536	5.86263	7.05307	7.00254	6.09364	6.74177	7.02458	6.67716	6.29134	6.31754	6.33159	5.8756	5.96679	5.40503	5.80484	6.72275	6.57766	5.89475	1.15813	1.13313	1.01549	0.211796	0.180317	0.0221749	0.0834564	0.0656033	0.0526119	0.0646878
sp|P46063|RECQ1_HUMAN	RECQL	RECQ1_HUMAN ATP-dependent DNA helicase Q1	17	5.79456	6.54977	5.51248	5.69052	6.90156	7.27536	6.40065	6.42451	7.06289	6.80504	6.32847	6.48384	5.86721	5.66119	5.82033	5.42162	5.88683	6.75052	6.67006	5.69259	1.14672	1.13305	0.967003	0.197507	0.180208	-0.048407	0.077639	0.0620857	0.0492621	0.0353116
sp|Q15573|TAF1A_HUMAN	TAF1A	TAF1A_HUMAN TATA box-binding protein-associated factor RNA polymerase I subunit A	4	5.99081	5.55888	5.89115	6.20819	6.38453	6.828	5.93795	6.1929	6.21675	6.39419	6.84019	7.34413	6.43189	5.80689	6.34294	5.63059	5.91226	6.33585	6.69881	6.05308	1.07165	1.13304	1.02382	0.0998279	0.180197	0.0339597	0.0457062	0.0592898	0.0752151	0.0651548
sp|Q13671|RIN1_HUMAN	RIN1	RIN1_HUMAN Ras and Rab interactor 1	6	5.91924	6.70658	5.23008	6.06723	6.51306	7.15502	6.21185	6.69212	6.87986	6.91791	6.36215	6.9432	5.95461	5.70194	5.34104	5.40412	5.98078	6.64301	6.77578	5.60043	1.11073	1.13293	0.936404	0.151503	0.180053	-0.0947973	0.101319	0.059415	0.0408779	0.0506685
sp|Q8TCG2|P4K2B_HUMAN	PI4K2B	P4K2B_HUMAN Phosphatidylinositol 4-kinase type 2-beta	8	5.57105	6.14254	5.64488	5.96455	6.71079	6.90087	6.58657	6.41184	6.58198	6.26283	7.03674	6.54166	6.04378	5.6942	6.20372	5.70201	5.83075	6.65252	6.6058	5.91093	1.14094	1.13292	1.01375	0.190218	0.180051	0.0197018	0.0461372	0.0309708	0.0485068	0.0430208
sp|Q8IYX8|CE57L_HUMAN	CEP57L1	CE57L_HUMAN Centrosomal protein CEP57L1	1	5.94718	6.26774	5.94178	5.63035	5.99056	5.77069	5.3511	6.84309	7.22598	7.04157	6.54041	6.13783	5.71536	7.22705	6.32382	6.04547	5.94676	5.98886	6.73645	6.32793	1.00708	1.13279	1.0641	0.0101769	0.179884	0.089628	0.043761	0.104901	0.0732025	0.102555
sp|Q6IPR3|TYW3_HUMAN	TYW3	TYW3_HUMAN tRNA wybutosine-synthesizing protein 3 homolog	7	5.88777	6.21375	5.58537	6.07001	6.45098	6.59312	6.03414	6.35719	7.24656	6.49576	6.43216	6.73162	6.26744	5.8694	6.11394	5.65079	5.93923	6.35886	6.72652	5.97539	1.07065	1.13256	1.00609	0.0984929	0.179587	0.00875879	0.0456295	0.0373043	0.0549837	0.0454314
sp|Q13322|GRB10_HUMAN	GRB10	GRB10_HUMAN Growth factor receptor-bound protein 10	3	5.57002	5.73663	5.80769	5.99319	5.54332	6.85002	5.93969	7.20137	6.07543	6.42068	6.52999	7.14385	6.06379	6.19986	5.9878	6.93668	5.77688	6.3836	6.54249	6.29703	1.10503	1.13253	1.09004	0.144079	0.179548	0.124381	0.0303385	0.120985	0.0680569	0.0691375
sp|O00212|RHOD_HUMAN	RHOD	RHOD_HUMAN Rho-related GTP-binding protein RhoD	1	5.94484	6.23658	6.84495	5.59721	6.20836	6.57388	4.47748	6.37196	6.45147	6.68405	7.43304	7.31772	7.41592	6.46439	4.42493	5.55321	6.1559	5.90792	6.97157	5.96461	0.959717	1.1325	0.968927	-0.0593183	0.179515	-0.0455402	0.0858549	0.163386	0.0685889	0.214178
sp|Q96EK7|F120B_HUMAN	FAM120B	F120B_HUMAN Constitutive coactivator of peroxisome proliferator-activated receptor gamma	12	5.92415	6.02877	5.84825	6.21082	6.2977	6.48478	5.71969	6.17624	8.37931	6.24058	6.08305	6.48859	6.23928	6.05077	5.90961	5.91842	6.003	6.1696	6.79788	6.02952	1.02775	1.13241	1.00442	0.0394945	0.179402	0.00636009	0.0261662	0.0527886	0.157022	0.0255454
sp|P04899-4|GNAI2_HUMAN	GNAI2	GNAI2_HUMAN Isoform sGi2 of Guanine nucleotide-binding protein G(i) subunit alpha-2	16	5.82346	6.35035	5.42408	5.81121	6.93155	6.99315	6.38727	6.68603	6.96916	6.49284	6.4743	6.57053	5.96581	5.81351	5.99689	5.30988	5.85227	6.7495	6.62671	5.77152	1.15331	1.13233	0.986202	0.205783	0.179295	-0.0200456	0.0649879	0.0408219	0.0350214	0.055102
sp|Q8TEB9|RHBL4_HUMAN	RHBDD1	RHBL4_HUMAN Rhomboid-related protein 4	1	4.96806	5.26174	6.1892	6.89979	5.96565	6.07243	6.72698	6.05313	6.31171	6.52441	7.04515	6.52216	6.60495	6.09108	5.91301	6.85055	5.8297	6.20455	6.60086	6.3649	1.0643	1.13228	1.09181	0.089905	0.179232	0.126716	0.151475	0.0566316	0.0473481	0.0686431
sp|P30419|NMT1_HUMAN	NMT1	NMT1_HUMAN Glycylpeptide N-tetradecanoyltransferase 1	14	5.58003	6.61165	5.48039	5.91677	6.67488	7.20933	6.40032	6.52207	6.90178	6.6463	6.66807	6.48524	6.15673	5.59019	6.07739	5.07886	5.89721	6.70165	6.67535	5.72579	1.13641	1.13195	0.970932	0.184484	0.17881	-0.0425572	0.0867499	0.0532117	0.0257021	0.0871049
sp|Q8IZP0|ABI1_HUMAN	ABI1	ABI1_HUMAN Abl interactor 1	9	5.69183	6.45151	5.87467	5.47419	6.87855	7.26485	6.86418	6.41712	6.46052	7.00901	6.69208	6.42994	5.42852	5.90813	5.67557	5.47934	5.87305	6.85618	6.64789	5.62289	1.1674	1.13193	0.957405	0.223294	0.178786	-0.0627981	0.0713337	0.0505498	0.0402666	0.0387635
sp|Q96NY9|MUS81_HUMAN	MUS81	MUS81_HUMAN Crossover junction endonuclease MUS81	1	6.67546	4.96705	5.93835	6.22451	6.20529	6.52036	5.26228	5.8903	7.68437	6.27364	6.32105	6.66379	6.08455	6.11389	6.5397	6.6354	5.95134	5.96956	6.73571	6.34339	1.00306	1.1318	1.06587	0.00440885	0.178615	0.0920378	0.121477	0.0899756	0.0973752	0.0449103
sp|P42685|FRK_HUMAN	FRK	FRK_HUMAN Tyrosine-protein kinase FRK	4	5.56748	6.51008	5.7627	5.55804	6.47038	7.0103	6.44908	6.16829	6.60831	6.47159	6.97108	6.43026	5.8065	6.10262	6.00892	6.10436	5.84957	6.52451	6.62031	6.0056	1.11538	1.13176	1.02667	0.157538	0.178567	0.0379766	0.0769846	0.0539353	0.0371453	0.0233152
sp|Q6PIW4|FIGL1_HUMAN	FIGNL1	FIGL1_HUMAN Fidgetin-like protein 1	9	5.6868	6.52413	5.52193	5.78284	6.63552	7.10988	6.50027	6.51472	6.52033	6.64684	6.75255	6.69398	5.99175	5.74899	5.81528	5.55419	5.87893	6.6901	6.65343	5.77755	1.13798	1.13174	0.982757	0.186475	0.178545	-0.0250939	0.0754263	0.042802	0.0148352	0.0312847
sp|Q14697-2|GANAB_HUMAN	GANAB	GANAB_HUMAN Isoform 2 of Neutral alpha-glucosidase AB	122	5.80762	6.29982	5.49085	5.92023	6.72775	7.05303	6.54792	6.56308	6.90358	6.69946	6.65149	6.35932	6.01741	5.66399	5.98825	5.30619	5.87963	6.72295	6.65346	5.74396	1.14343	1.13161	0.976925	0.193368	0.17838	-0.0336797	0.0567957	0.0349016	0.0337415	0.0579585
sp|O00329|PK3CD_HUMAN	PIK3CD	PK3CD_HUMAN Phosphatidylinositol 4,5-bisphosphate 3-kinase catalytic subunit delta isoform	4	5.7217	6.10187	5.6458	5.55114	5.92855	7.01554	6.60039	7.02306	6.57242	6.80291	6.2136	6.45728	5.6763	6.34462	5.95979	6.38503	5.75513	6.64189	6.51155	6.09144	1.15408	1.13143	1.05844	0.206745	0.178154	0.0819342	0.0419559	0.0775288	0.0376505	0.0552636
sp|O60888-2|CUTA_HUMAN	CUTA	CUTA_HUMAN Isoform A of Protein CutA	5	5.47349	5.72049	6.08209	5.6541	5.78352	5.68811	7.11165	9.53735	6.31116	7.16873	7.02747	5.43506	6.10465	6.80825	5.33988	4.75401	5.73254	7.03016	6.48561	5.7517	1.22636	1.13137	1.00334	0.294382	0.178066	0.00481266	0.0445416	0.255088	0.122523	0.155696
sp|Q9BXW7|CECR5_HUMAN	CECR5	CECR5_HUMAN Cat eye syndrome critical region protein 5	23	5.71352	6.61637	5.47856	5.88762	6.78512	6.96679	6.32203	6.4604	7.19587	6.55662	6.457	6.59881	6.00602	5.61403	6.13495	5.20629	5.92402	6.63359	6.70207	5.74032	1.11978	1.13134	0.968991	0.163213	0.178032	-0.0454441	0.082893	0.0444684	0.0499133	0.0730467
sp|Q9H9Y2|RPF1_HUMAN	RPF1	RPF1_HUMAN Ribosome production factor 1	1	6.39962	5.36531	5.55996	6.71625	5.83112	5.76327	5.87698	6.78722	6.48003	6.84889	6.33217	7.53007	5.7745	6.16158	5.57094	7.0021	6.01028	6.06465	6.79779	6.12728	1.00904	1.13103	1.01947	0.0129904	0.177632	0.0278134	0.108201	0.0798026	0.0786078	0.103239
sp|P60763|RAC3_HUMAN	RAC3	RAC3_HUMAN Ras-related C3 botulinum toxin substrate 3	1	5.67191	5.9852	5.74241	6.15872	6.93491	6.71388	7.61702	7.38103	6.16819	7.28562	7.19395	5.99535	4.54923	5.93371	5.8429	4.82595	5.88956	7.16171	6.66078	5.28795	1.216	1.13095	0.897851	0.282144	0.177531	-0.155452	0.0380449	0.0574245	0.101089	0.133011
sp|Q2PZI1|D19L1_HUMAN	DPY19L1	D19L1_HUMAN Probable C-mannosyltransferase DPY19L1	10	5.6696	6.28416	5.77468	5.6704	6.9722	7.19686	6.70753	6.47741	6.53773	6.56187	6.6294	6.73322	6.08021	5.76619	5.92193	5.01662	5.84971	6.8385	6.61555	5.69624	1.16903	1.13092	0.973764	0.225315	0.177497	-0.0383558	0.0502259	0.0457648	0.0132284	0.0826627
sp|Q8N335|GPD1L_HUMAN	GPD1L	GPD1L_HUMAN Glycerol-3-phosphate dehydrogenase 1-like protein	20	5.70331	6.37187	5.7011	5.87053	6.85709	7.19388	6.54226	6.60976	6.78606	7.04397	6.62852	6.2797	5.78191	5.65743	5.72546	5.24716	5.9117	6.80075	6.68456	5.60299	1.15039	1.13073	0.947779	0.20212	0.177259	-0.0773768	0.0536014	0.043373	0.0478193	0.0433015
sp|Q15126|PMVK_HUMAN	PMVK	PMVK_HUMAN Phosphomevalonate kinase	12	5.56752	6.30869	5.51412	6.16957	6.94139	6.90468	6.49497	6.71716	6.81897	6.52885	6.74019	6.55075	6.1517	5.47675	5.88773	5.22696	5.88997	6.76455	6.65969	5.68579	1.14849	1.13068	0.965333	0.199732	0.177194	-0.050902	0.069225	0.0302753	0.0213831	0.0726634
sp|Q96E14|RMI2_HUMAN	RMI2	RMI2_HUMAN RecQ-mediated genome instability protein 2	2	5.72627	6.18778	6.22822	5.65731	6.42921	6.86503	7.30437	6.07496	7.03752	6.23399	7.37374	6.26391	5.14496	6.52544	5.75292	5.19438	5.94989	6.66839	6.72729	5.65442	1.12076	1.13066	0.95034	0.164475	0.177161	-0.0734839	0.0503901	0.0799404	0.084621	0.11368
sp|Q8N2K0-2|ABD12_HUMAN	ABHD12	ABD12_HUMAN Isoform 2 of Monoacylglycerol lipase ABHD12	5	5.54122	6.35682	5.4831	5.87176	6.49389	6.91319	5.9409	6.53436	6.5633	6.62787	6.52143	6.57246	6.54342	5.99722	5.9963	6.04275	5.81323	6.47058	6.57126	6.14492	1.11308	1.1304	1.05706	0.154557	0.176832	0.0800561	0.068944	0.0618874	0.00666376	0.043377
sp|Q9NRG9|AAAS_HUMAN	AAAS	AAAS_HUMAN Aladin	12	5.80715	6.29535	5.73873	5.76879	6.5533	7.06245	6.3577	6.50151	6.90418	6.89971	6.53045	6.35125	6.01978	5.78058	5.95331	5.47577	5.9025	6.61874	6.6714	5.80736	1.12134	1.13027	0.983881	0.165229	0.176662	-0.0234449	0.0446233	0.0464079	0.0413839	0.041837
sp|Q92643|GPI8_HUMAN	PIGK	GPI8_HUMAN GPI-anchor transamidase	6	5.91312	6.11192	5.45889	6.2768	6.42998	7.05684	6.53234	6.58645	6.99318	6.61246	6.54841	6.69494	5.90824	5.69725	5.82638	5.35281	5.94018	6.6514	6.71225	5.69617	1.11973	1.12997	0.958922	0.163151	0.176289	-0.0605151	0.0595332	0.0417912	0.0292984	0.0429816
sp|Q9H7U1-3|CCSE2_HUMAN	CCSER2	CCSE2_HUMAN Isoform 3 of Serine-rich coiled-coil domain-containing protein 2	1	5.20094	5.64489	6.43157	5.7698	5.35477	6.11902	5.27203	5.54104	7.14068	6.46348	6.01561	6.4194	7.63716	6.53693	7.18217	7.2705	5.7618	5.57172	6.50979	7.15669	0.967009	1.12982	1.24209	-0.0483981	0.176092	0.312773	0.0883203	0.0685283	0.0716439	0.0639586
sp|Q9NW81-4|AT5SL_HUMAN	ATP5SL	AT5SL_HUMAN Isoform 4 of ATP synthase subunit s-like protein	4	6.19466	6.10167	6.08973	5.90177	6.08154	6.39276	6.13793	6.21962	7.03775	6.46508	6.87116	7.0666	6.15108	5.61272	5.99941	5.67652	6.07196	6.20796	6.86015	5.85993	1.0224	1.12981	0.965081	0.0319581	0.176078	-0.0512776	0.0202194	0.0218451	0.0403937	0.0439487
sp|Q14203|DCTN1_HUMAN	DCTN1	DCTN1_HUMAN Dynactin subunit 1	42	5.77792	6.37511	5.54291	5.9938	6.55626	6.88702	6.31894	6.41944	6.97368	6.81082	6.56734	6.41089	6.20685	5.74501	5.90378	5.51023	5.92244	6.54542	6.69068	5.84147	1.10519	1.12972	0.986329	0.144294	0.175963	-0.0198596	0.0596918	0.0378337	0.037417	0.0500477
sp|Q9BQL6|FERM1_HUMAN	FERMT1	FERM1_HUMAN Fermitin family homolog 1	21	5.84933	6.36844	5.58846	5.90813	6.65574	7.38499	6.54863	6.48426	6.88834	6.6222	6.66066	6.61894	5.721	5.60013	5.89844	5.2023	5.92859	6.7684	6.69754	5.60547	1.14166	1.1297	0.945498	0.191127	0.175941	-0.0808543	0.054731	0.0616241	0.0192021	0.0526955
sp|Q13522|PPR1A_HUMAN	PPP1R1A	PPR1A_HUMAN Protein phosphatase 1 regulatory subunit 1A	1	4.95196	5.16462	6.09524	7.02316	6.60819	6.03369	6.46693	7.20079	6.84771	6.32575	6.4997	6.57477	5.43739	5.72222	6.77112	6.27678	5.80875	6.5774	6.56198	6.05188	1.13233	1.12967	1.04186	0.179291	0.175905	0.0591563	0.163497	0.0733031	0.0330952	0.0979496
sp|O60930|RNH1_HUMAN	RNASEH1	RNH1_HUMAN Ribonuclease H1	2	5.48124	6.22006	5.7532	5.64081	6.7675	6.98656	6.35705	6.22462	6.829	6.52665	5.99771	6.7347	6.76687	5.82605	6.11805	5.76994	5.77383	6.58393	6.52202	6.12023	1.14031	1.12958	1.05999	0.189422	0.17579	0.0840573	0.0550287	0.0537986	0.0569853	0.0747208
sp|Q13064|MKRN3_HUMAN	MKRN3	MKRN3_HUMAN Probable E3 ubiquitin-protein ligase makorin-3	1	5.4678	4.77201	5.05606	8.06997	8.20306	5.60371	5.58392	5.91201	6.01956	7.29785	6.06564	7.00778	4.96262	6.40864	6.38369	7.18569	5.84146	6.32568	6.59771	6.23516	1.08289	1.12946	1.0674	0.11489	0.175636	0.0940976	0.258991	0.199279	0.0988376	0.148587
sp|Q9NRG4|SMYD2_HUMAN	SMYD2	SMYD2_HUMAN N-lysine methyltransferase SMYD2	4	5.74544	6.27181	5.92794	5.99567	6.24484	6.8232	6.68075	6.28197	6.9391	6.39927	6.89388	6.80457	6.03711	5.58982	5.9345	5.43014	5.98522	6.50769	6.7592	5.74789	1.08729	1.12932	0.960349	0.120742	0.17545	-0.05837	0.0364801	0.0443179	0.0364512	0.0496594
sp|O60678|ANM3_HUMAN	PRMT3	ANM3_HUMAN Protein arginine N-methyltransferase 3	15	5.71039	6.6216	5.4431	5.80491	6.47313	7.20433	6.5112	6.41998	6.81895	6.91554	6.4483	6.44088	5.93956	5.83409	5.8633	5.55073	5.895	6.65216	6.65592	5.79692	1.12844	1.12908	0.983362	0.174331	0.175146	-0.0242052	0.086184	0.0556224	0.0371405	0.0293333
sp|Q9HC21|TPC_HUMAN	SLC25A19	TPC_HUMAN Mitochondrial thiamine pyrophosphate carrier	7	5.75092	6.07563	5.65326	5.85059	6.41869	6.68491	6.39439	6.33359	6.81614	6.51715	6.41917	6.58577	6.54714	6.39348	5.79739	5.76178	5.8326	6.4579	6.58456	6.12495	1.10721	1.12892	1.05012	0.146925	0.174947	0.0705583	0.0310228	0.0240818	0.025643	0.0659525
sp|Q9BVI4|NOC4L_HUMAN	NOC4L	NOC4L_HUMAN Nucleolar complex protein 4 homolog	9	5.25318	6.70583	5.83087	5.92083	6.75061	7.14891	6.18144	6.59141	6.99732	6.95068	6.31906	6.49993	6.24755	5.90854	5.52752	5.16632	5.92768	6.66809	6.69175	5.71248	1.12491	1.1289	0.963697	0.169807	0.174916	-0.0533491	0.100745	0.0600312	0.0500197	0.0819363
sp|P51570|GALK1_HUMAN	GALK1	GALK1_HUMAN Galactokinase	12	5.63215	6.34782	5.55817	5.92999	7.02429	7.28531	6.68551	6.27075	6.98215	6.79249	6.48675	6.22639	5.90203	5.81453	5.64615	5.41553	5.86703	6.81646	6.62195	5.69456	1.16182	1.12867	0.970603	0.216393	0.174624	-0.0430466	0.0611136	0.0643916	0.0503559	0.0376139
sp|Q9BSV6|SEN34_HUMAN	TSEN34	SEN34_HUMAN tRNA-splicing endonuclease subunit Sen34	12	5.7315	6.38662	5.50717	5.92844	6.58758	6.76252	6.35917	6.67396	6.73061	6.82959	6.75755	6.26401	6.36342	5.73521	5.85265	5.53001	5.88843	6.59581	6.64544	5.87032	1.12013	1.12856	0.996924	0.163666	0.174481	-0.00444388	0.0635259	0.0262549	0.038778	0.0604297
sp|Q6UWZ7|F175A_HUMAN	FAM175A	F175A_HUMAN BRCA1-A complex subunit Abraxas	1	6.52246	6.88224	5.31607	5.01882	6.05228	6.66395	6.12796	6.45459	5.83583	6.83454	8.08075	6.03497	6.20635	8.06711	5.46511	4.43696	5.9349	6.32469	6.69652	6.04388	1.06568	1.12833	1.01836	0.0917728	0.174189	0.0262525	0.152728	0.0451729	0.152132	0.253407
sp|Q9Y2S2|CRYL1_HUMAN	CRYL1	CRYL1_HUMAN Lambda-crystallin homolog	8	5.77569	5.99197	5.70609	6.24302	6.38045	6.46596	6.56034	6.38566	6.93355	6.4562	6.49649	6.87206	6.08248	5.94959	5.91374	5.78672	5.92919	6.4481	6.68958	5.93313	1.08752	1.12824	1.00066	0.121039	0.174079	0.000958365	0.0408236	0.0130959	0.0370785	0.0205017
sp|Q8WXE1|ATRIP_HUMAN	ATRIP	ATRIP_HUMAN ATR-interacting protein	3	5.85554	6.15141	5.7921	6.10452	6.72805	7.03271	6.01721	6.38378	6.89673	6.79161	7.30289	5.9743	6.35362	5.70461	5.72013	5.19078	5.97589	6.54044	6.74138	5.74228	1.09447	1.1281	0.960908	0.130233	0.17389	-0.0575293	0.0298746	0.0669859	0.0826069	0.0828981
sp|O43739|CYH3_HUMAN	CYTH3	CYH3_HUMAN Cytohesin-3	1	6.02646	6.1783	6.1826	4.89328	6.34854	7.06878	6.63354	6.36941	6.57419	5.82421	6.95617	6.90791	5.96911	6.20455	6.34995	5.51302	5.82016	6.60507	6.56562	6.00916	1.13486	1.12808	1.03247	0.182514	0.173872	0.0461039	0.106899	0.0507567	0.0796024	0.0609226
sp|O94952|FBX21_HUMAN	FBXO21	FBX21_HUMAN F-box only protein 21	8	5.5988	6.61936	5.89505	5.8247	6.53719	6.57683	6.46252	6.45188	6.70821	6.69045	7.06416	6.53908	5.59744	5.68758	5.94559	5.80117	5.98448	6.50711	6.75047	5.75794	1.08733	1.128	0.962147	0.120791	0.173764	-0.0556713	0.0738109	0.00922253	0.0329558	0.0261073
sp|Q9Y2K7|KDM2A_HUMAN	KDM2A	KDM2A_HUMAN Lysine-specific demethylase 2A	3	6.07338	6.36572	5.95135	5.7473	6.56706	6.82075	6.89754	6.19456	6.45817	7.29095	6.89471	6.58197	6.04872	5.60567	5.40976	5.09238	6.03444	6.61998	6.80645	5.53913	1.09703	1.12793	0.91792	0.133607	0.173683	-0.123559	0.0428534	0.0478587	0.0545927	0.0722459
sp|O14939|PLD2_HUMAN	PLD2	PLD2_HUMAN Phospholipase D2	4	5.69264	6.65504	5.69507	5.51632	6.72968	7.53548	6.28467	6.30246	6.66963	7.01211	6.48295	6.40714	5.93353	5.7124	6.12996	5.24093	5.88977	6.71307	6.64296	5.7542	1.13979	1.12788	0.976983	0.188763	0.173615	-0.0335941	0.0877796	0.0872319	0.0405978	0.0664451
sp|Q9Y6M9|NDUB9_HUMAN	NDUFB9	NDUB9_HUMAN NADH dehydrogenase [ubiquinone] 1 beta subcomplex subunit 9	12	5.73273	6.37739	5.53521	6.08576	6.66374	6.71141	6.23582	6.45086	6.70558	6.89596	6.63548	6.52842	5.93883	5.80669	6.15475	5.54136	5.93277	6.51546	6.69136	5.86041	1.09821	1.12786	0.987802	0.13516	0.173593	-0.0177055	0.0630047	0.0334804	0.0231096	0.043778
sp|Q8TCU6|PREX1_HUMAN	PREX1	PREX1_HUMAN Phosphatidylinositol 3,4,5-trisphosphate-dependent Rac exchanger 1 protein	3	5.71337	5.65061	6.41119	6.02953	5.7301	7.04691	6.32078	5.33566	6.95359	6.76894	6.73628	6.38715	5.29325	6.00153	6.89379	6.72732	5.95118	6.10836	6.71149	6.22897	1.02641	1.12776	1.04668	0.0376111	0.173459	0.0658197	0.0585829	0.122003	0.0352304	0.117886
sp|O00232|PSD12_HUMAN	PSMD12	PSD12_HUMAN 26S proteasome non-ATPase regulatory subunit 12	49	5.87826	6.60655	5.39407	5.77072	6.91865	7.29449	6.25226	6.43024	6.90508	6.86133	6.56379	6.33844	6.07652	5.65298	5.86428	5.19233	5.9124	6.72391	6.66716	5.69653	1.13726	1.12766	0.963488	0.185557	0.173328	-0.0536611	0.0857854	0.070398	0.0399705	0.0663558
sp|Q9NPJ3|ACO13_HUMAN	ACOT13	ACO13_HUMAN Acyl-coenzyme A thioesterase 13	4	5.86694	6.46221	5.58968	5.17949	6.35699	7.19818	6.86034	7.19463	6.72504	6.61386	6.26696	6.44014	5.58562	6.07848	6.2557	5.32572	5.77458	6.90254	6.5115	5.81138	1.19533	1.12761	1.00637	0.25741	0.173274	0.00916477	0.0932395	0.0574724	0.0308386	0.0740525
sp|Q5BKU9|OXLD1_HUMAN	OXLD1	OXLD1_HUMAN Oxidoreductase-like domain-containing protein 1	2	4.48735	6.75722	6.01423	6.06797	5.8347	5.95527	6.87952	6.54424	5.41124	5.44261	6.55455	8.89285	6.24694	6.57363	6.07393	6.26376	5.83169	6.30343	6.57531	6.28957	1.08089	1.12751	1.07851	0.112223	0.173145	0.109046	0.164266	0.0782995	0.248499	0.0330556
sp|Q6YI46|TMM64_HUMAN	TMEM64	TMM64_HUMAN Transmembrane protein 64	1	4.55936	6.45226	6.12175	6.48807	4.56008	5.48008	6.51009	5.31559	6.87372	6.46619	7.08895	6.19326	6.51237	6.70846	6.91275	7.75702	5.90536	5.46646	6.65553	6.97265	0.925678	1.12703	1.18073	-0.111418	0.172529	0.239682	0.154497	0.146866	0.0604128	0.0785739
sp|Q9UQ16-4|DYN3_HUMAN	DNM3	DYN3_HUMAN Isoform 4 of Dynamin-3	21	5.78196	6.64039	5.28234	5.72867	7.24435	7.07385	6.29526	6.33094	7.14559	6.67022	6.26121	6.33298	6.29981	5.66088	5.95473	5.2968	5.85834	6.7361	6.6025	5.80305	1.14983	1.12703	0.990563	0.201422	0.17252	-0.0136793	0.0968633	0.0732751	0.0611267	0.0735343
sp|Q9H496|IFG15_HUMAN	IFRG15	IFG15_HUMAN 15 kDa interferon-responsive protein	1	5.58209	5.29467	6.6303	6.43052	4.89669	6.69438	6.49703	6.89842	7.19625	7.45091	6.34686	5.97923	5.67149	6.73766	5.98047	5.71301	5.9844	6.24663	6.74331	6.02566	1.04382	1.12682	1.0069	0.0618727	0.172252	0.00991327	0.108027	0.14644	0.102986	0.0819864
sp|Q14257|RCN2_HUMAN	RCN2	RCN2_HUMAN Reticulocalbin-2	16	5.57914	6.60648	5.33706	5.81002	6.66409	7.15539	6.40282	6.34752	6.65087	6.74581	6.49589	6.39844	6.25435	5.95583	6.02828	5.56803	5.83318	6.64245	6.57275	5.95162	1.13874	1.12679	1.02031	0.187435	0.172216	0.0290017	0.0943766	0.0555177	0.0236262	0.0479849
sp|P33992|MCM5_HUMAN	MCM5	MCM5_HUMAN DNA replication licensing factor MCM5	58	5.77658	6.46171	5.63579	5.8187	6.85648	7.21458	6.19658	6.29685	7.17787	6.71484	6.43405	6.36756	6.03129	5.87783	5.78454	5.35476	5.92319	6.64112	6.67358	5.76211	1.12121	1.12669	0.972804	0.165052	0.172085	-0.0397796	0.0620325	0.072286	0.0551945	0.0503274
sp|Q6JQN1-5|ACD10_HUMAN	ACAD10	ACD10_HUMAN Isoform 5 of Acyl-CoA dehydrogenase family member 10	6	5.83243	6.30495	5.48262	5.5874	6.69916	6.89739	6.43569	6.00998	6.38613	6.80094	6.54714	6.41212	6.30036	6.26352	6.14081	5.89934	5.80185	6.51056	6.53658	6.15101	1.12215	1.12664	1.06018	0.166268	0.172024	0.0843097	0.0630891	0.0589161	0.0290434	0.0294444
sp|O96017-9|CHK2_HUMAN	CHEK2	CHK2_HUMAN Isoform 9 of Serine/threonine-protein kinase Chk2	11	5.78463	6.18844	5.87198	5.97118	6.51264	7.25079	6.3231	6.59967	6.55448	6.94785	6.78836	6.54077	5.64922	5.7688	6.04777	5.20034	5.95406	6.67155	6.70786	5.66653	1.1205	1.1266	0.951709	0.164149	0.17198	-0.071407	0.0291985	0.0604137	0.0292539	0.062263
sp|Q5T2T1|MPP7_HUMAN	MPP7	MPP7_HUMAN MAGUK p55 subfamily member 7	18	5.80797	6.37263	5.57367	5.7584	6.60847	7.11937	6.03534	6.51278	7.08874	6.7278	6.25589	6.41697	6.09977	6.15974	5.97088	5.49158	5.87817	6.56899	6.62235	5.93049	1.11752	1.1266	1.0089	0.160305	0.171977	0.0127854	0.0586432	0.067648	0.0554901	0.0510972
sp|Q96GD4|AURKB_HUMAN	AURKB	AURKB_HUMAN Aurora kinase B	8	5.40072	5.11069	6.33624	6.20706	6.1502	6.0311	6.34963	5.81228	6.23768	6.52746	6.6216	6.58584	6.75966	6.73666	6.1879	6.94528	5.76368	6.0858	6.49315	6.65738	1.05589	1.12656	1.15506	0.0784579	0.171928	0.207964	0.104223	0.0369328	0.0269013	0.0490616
sp|Q6P9B6|TLDC1_HUMAN	TLDC1	TLDC1_HUMAN TLD domain-containing protein 1	5	5.75605	6.22349	5.88749	6.01668	6.33156	6.86296	6.76169	6.11074	6.4832	6.37042	7.00755	7.04411	6.05661	5.60038	6.0729	5.41418	5.97093	6.51674	6.72632	5.78602	1.09141	1.12651	0.969032	0.126195	0.171862	-0.0453844	0.0333579	0.0545415	0.0519177	0.0571689
sp|P12644|BMP4_HUMAN	BMP4	BMP4_HUMAN Bone morphogenetic protein 4	1	6.69948	6.24746	5.35213	6.10235	7.37917	5.40005	6.52134	5.37081	7.70755	6.90426	5.52592	7.34901	5.71474	5.84049	6.66748	5.21777	6.10036	6.16784	6.87169	5.86012	1.01106	1.12644	0.96062	0.0158727	0.171771	-0.057963	0.0917801	0.15711	0.139042	0.102669
sp|Q9H5U6|ZCHC4_HUMAN	ZCCHC4	ZCHC4_HUMAN Zinc finger CCHC domain-containing protein 4	1	5.60387	6.60419	5.5208	5.95209	6.54393	7.03464	4.78755	6.23141	7.08046	6.83107	6.27009	6.48945	6.06665	6.00824	5.60489	7.37067	5.92024	6.14938	6.66777	6.26261	1.03871	1.12627	1.05783	0.0547865	0.171549	0.0811096	0.0832336	0.157123	0.0538609	0.122425
sp|Q15526|SURF1_HUMAN	SURF1	SURF1_HUMAN Surfeit locus protein 1	13	6.10518	6.63494	5.4823	5.56286	6.57181	7.4197	6.42293	6.46273	7.16647	7.03639	6.38691	6.19289	5.71337	5.83285	5.94661	5.06208	5.94632	6.71929	6.69566	5.63873	1.12999	1.12602	0.948272	0.176312	0.17123	-0.0766275	0.0901347	0.0701206	0.0714109	0.0702376
sp|Q53RE8|ANR39_HUMAN	ANKRD39	ANR39_HUMAN Ankyrin repeat domain-containing protein 39	1	6.18207	6.42609	5.24499	6.21879	6.589	7.59291	6.61245	6.17835	5.94993	7.52246	7.15229	6.47885	5.5305	5.88825	4.94857	5.4845	6.01798	6.74318	6.77588	5.46296	1.1205	1.12594	0.907771	0.164148	0.171128	-0.139599	0.0874725	0.0890585	0.10329	0.0709343
sp|Q8NFF5|FAD1_HUMAN	FLAD1	FAD1_HUMAN FAD synthase	11	5.79738	6.79362	5.55297	5.72038	6.53897	6.99168	6.50204	6.5662	6.87737	6.50843	6.64935	6.83175	5.95046	5.58302	5.83503	5.30136	5.96609	6.64972	6.71673	5.66747	1.11459	1.12582	0.949947	0.156509	0.170973	-0.0740809	0.0940388	0.0345101	0.0253484	0.050867
sp|Q8WU76|SCFD2_HUMAN	SCFD2	SCFD2_HUMAN Sec1 family domain-containing protein 2	6	5.50846	6.30511	5.87042	6.35048	6.24578	6.60156	6.22129	6.02615	7.53568	6.31362	6.45965	6.74794	6.08883	5.72875	6.02321	5.97307	6.00862	6.2737	6.76422	5.95346	1.04412	1.12575	0.990821	0.0622823	0.170891	-0.0133035	0.066156	0.0381995	0.0805775	0.026393
sp|Q7Z6J8|UBE3D_HUMAN	UBE3D	UBE3D_HUMAN E3 ubiquitin-protein ligase E3D	2	5.23738	5.87566	6.19812	6.05298	6.58602	6.75253	6.30214	5.94419	6.7248	6.85909	7.0287	5.68557	5.95713	6.28942	6.23439	6.27187	5.84103	6.39622	6.57454	6.1882	1.09505	1.12558	1.05944	0.130996	0.170666	0.0832964	0.0725024	0.055361	0.0921054	0.0251687
sp|Q9BSJ6|FA64A_HUMAN	FAM64A	FA64A_HUMAN Protein FAM64A	1	6.31976	5.86295	6.57212	5.56044	5.66462	6.04786	6.4279	5.93643	6.84707	6.27093	7.5217	6.72312	6.48908	5.40943	6.37249	5.97408	6.07882	6.0192	6.8407	6.06127	0.990193	1.12533	0.997113	-0.0142184	0.170354	-0.0041706	0.0745869	0.0525746	0.0755957	0.0803953
sp|O43861|ATP9B_HUMAN	ATP9B	ATP9B_HUMAN Probable phospholipid-transporting ATPase IIB	1	5.22575	5.54476	7.00331	5.73256	7.83582	7.1428	5.3666	6.73176	8.07616	5.15556	5.98771	7.22859	7.03698	5.76833	5.24835	4.91495	5.8766	6.76924	6.612	5.74215	1.1519	1.12514	0.977122	0.204014	0.170107	-0.0333888	0.132684	0.153663	0.19593	0.162293
sp|Q14679|TTLL4_HUMAN	TTLL4	TTLL4_HUMAN Tubulin polyglutamylase TTLL4	2	6.06288	6.50675	6.20447	6.04675	6.14441	6.17266	5.62584	5.6981	6.92581	7.23133	6.59251	7.17596	6.06713	5.64797	5.84923	6.04819	6.20521	5.91025	6.9814	5.90313	0.952466	1.12509	0.951318	-0.0702608	0.170036	-0.0720005	0.0343496	0.0488027	0.0417315	0.0333037
sp|Q6NXT4-2|ZNT6_HUMAN	SLC30A6	ZNT6_HUMAN Isoform 2 of Zinc transporter 6	2	6.38006	5.67898	5.43423	6.60555	6.33192	6.25331	6.1981	6.28296	6.82521	6.92312	6.58283	6.77574	6.51678	6.31938	5.42048	5.47134	6.0247	6.26657	6.77672	5.932	1.04015	1.12482	0.984612	0.056786	0.169698	-0.0223732	0.0925072	0.00893404	0.0211071	0.0956539
sp|Q96EK9|KTI12_HUMAN	KTI12	KTI12_HUMAN Protein KTI12 homolog	5	5.76806	6.69329	5.25861	5.7571	6.60801	7.26629	6.36337	6.26189	7.07287	6.66995	6.20662	6.45438	6.02367	5.87582	6.12458	5.59551	5.86927	6.62489	6.60095	5.9049	1.12874	1.12466	1.00607	0.174717	0.169495	0.00873156	0.101978	0.0681679	0.0556242	0.0389794
sp|Q9NRR6|INP5E_HUMAN	INPP5E	INP5E_HUMAN 72 kDa inositol polyphosphate 5-phosphatase	2	5.68751	6.31571	5.40546	5.51713	6.39835	7.12359	6.27608	6.3677	6.78236	6.00693	6.58093	6.41157	6.39456	6.27397	6.20341	6.25473	5.73145	6.54143	6.44545	6.28167	1.14132	1.12457	1.096	0.190705	0.16938	0.132247	0.0709077	0.0598596	0.05109	0.0128851
sp|Q13286|CLN3_HUMAN	CLN3	CLN3_HUMAN Battenin	1	4.94159	7.1089	6.0204	5.50997	5.75962	6.83978	6.36408	6.1116	6.59731	5.59897	7.72549	6.59475	5.86188	6.2454	6.89976	5.82051	5.89521	6.26877	6.62913	6.20689	1.06337	1.12449	1.05287	0.088638	0.169275	0.0743256	0.156283	0.0724649	0.131087	0.0805489
sp|O00231|PSD11_HUMAN	PSMD11	PSD11_HUMAN 26S proteasome non-ATPase regulatory subunit 11	54	5.88243	6.5969	5.40613	5.69508	7.00937	7.09943	6.2135	6.20856	6.98515	6.83749	6.38286	6.30954	6.33023	5.94411	5.79508	5.30413	5.89514	6.63271	6.62876	5.84339	1.12512	1.12445	0.991222	0.170075	0.169214	-0.0127199	0.0860386	0.0736215	0.050257	0.0726255
sp|P30989|NTR1_HUMAN	NTSR1	NTR1_HUMAN Neurotensin receptor type 1	2	5.68762	6.64487	6.55686	5.45067	7.53061	7.73854	7.00278	6.10017	6.19486	7.36096	7.23699	6.57404	5.57495	5.43215	4.75965	4.15428	6.085	7.09302	6.84171	4.98026	1.16566	1.12436	0.818448	0.221143	0.169099	-0.289038	0.0993485	0.103027	0.0807617	0.131606
sp|Q9H4E7|DEFI6_HUMAN	DEF6	DEFI6_HUMAN Differentially expressed in FDCP 6 homolog	13	5.60928	6.43572	5.83621	5.99059	6.70804	6.99261	6.49194	6.21936	6.80418	6.48833	6.82264	6.72523	6.01802	5.66643	5.8497	5.34173	5.96795	6.60299	6.71009	5.71897	1.10641	1.12436	0.95828	0.145883	0.169098	-0.0614801	0.0584725	0.049643	0.0229148	0.0506372
sp|Q12769|NU160_HUMAN	NUP160	NU160_HUMAN Nuclear pore complex protein Nup160	27	5.60512	6.30218	5.67241	6.15419	6.67688	7.00596	6.22558	6.57022	6.88783	6.92228	6.50617	6.3676	6.10772	5.70305	5.74071	5.5521	5.93347	6.61966	6.67097	5.77589	1.11565	1.12429	0.973442	0.15788	0.169019	-0.0388328	0.0584334	0.0485799	0.0414501	0.0408165
sp|Q6KCM7-3|SCMC2_HUMAN	SLC25A25	SCMC2_HUMAN Isoform 3 of Calcium-binding mitochondrial carrier protein SCaMC-2	4	5.53401	6.14655	5.76293	5.80904	6.74928	7.36408	6.24829	6.87058	6.35301	6.47054	6.6864	6.63082	5.93997	5.94343	5.83728	5.6538	5.81313	6.80806	6.53519	5.84362	1.17115	1.12421	1.00524	0.227927	0.168914	0.00754657	0.0434753	0.0673038	0.0232699	0.0232374
sp|Q9ULC5-3|ACSL5_HUMAN	ACSL5	ACSL5_HUMAN Isoform 2 of Long-chain-fatty-acid--CoA ligase 5	40	5.71594	6.51163	5.41339	5.81985	6.82111	7.12575	6.29882	6.64095	6.91848	6.80026	6.37001	6.28515	6.21326	5.80076	5.79257	5.47207	5.8652	6.72166	6.59347	5.81967	1.14602	1.12417	0.992236	0.196636	0.168858	-0.0112448	0.0791383	0.051428	0.0474293	0.0521974
sp|Q9BV86|NTM1A_HUMAN	NTMT1	NTM1A_HUMAN N-terminal Xaa-Pro-Lys N-methyltransferase 1	9	5.58476	6.50007	5.32985	6.01535	6.74465	7.12086	6.41293	6.70974	7.07406	6.44123	6.43747	6.38641	6.10646	5.73763	6.12528	5.27326	5.85751	6.74704	6.58479	5.81066	1.15186	1.12416	0.992002	0.203969	0.168851	-0.0115855	0.0876413	0.0430216	0.0496804	0.0688831
sp|P20936|RASA1_HUMAN	RASA1	RASA1_HUMAN Ras GTPase-activating protein 1	14	5.72335	6.45457	5.73027	5.88401	6.51359	7.18021	6.47778	6.46114	6.68445	7.01288	6.42809	6.61885	5.88486	5.84973	5.67649	5.41974	5.94805	6.65818	6.68607	5.70771	1.11939	1.12408	0.959593	0.162711	0.168741	-0.059506	0.0581245	0.0523728	0.0364193	0.0372282
sp|Q9BU61|NDUF3_HUMAN	NDUFAF3	NDUF3_HUMAN NADH dehydrogenase [ubiquinone] 1 alpha subcomplex assembly factor 3	9	5.90618	6.25854	5.5981	5.90816	6.61109	7.07938	6.25206	6.39606	6.60788	6.74926	6.83079	6.40707	6.04079	5.9203	5.89734	5.537	5.91774	6.58465	6.64875	5.84886	1.1127	1.12353	0.988359	0.154059	0.168036	-0.0168927	0.0456088	0.0548719	0.0279121	0.0371381
sp|Q9Y394|DHRS7_HUMAN	DHRS7	DHRS7_HUMAN Dehydrogenase/reductase SDR family member 7	14	5.98031	6.46695	5.53572	5.75408	6.40665	6.91375	6.26305	6.38953	6.84895	6.73071	6.55914	6.5286	6.05055	6.03562	6.0074	5.52899	5.93426	6.49324	6.66685	5.90564	1.0942	1.12345	0.995176	0.12987	0.167936	-0.00697594	0.0672067	0.0442858	0.0225748	0.0426265
sp|Q15013-3|MD2BP_HUMAN	MAD2L1BP	MD2BP_HUMAN Isoform 2 of MAD2L1-binding protein	2	5.98479	6.16537	5.09954	5.87648	7.04414	7.44442	6.47748	6.28532	6.5789	6.35323	6.58773	6.4595	6.31881	5.99909	5.92398	5.40124	5.78155	6.81284	6.49484	5.91078	1.17838	1.12337	1.02235	0.236801	0.167839	0.0318934	0.0812977	0.0778144	0.0170983	0.0643555
sp|Q14738|2A5D_HUMAN	PPP2R5D	2A5D_HUMAN Serine/threonine-protein phosphatase 2A 56 kDa regulatory subunit delta isoform	20	5.71703	6.53346	5.45133	5.93608	6.63021	7.18495	6.20921	6.50642	6.80409	6.61657	6.55915	6.57093	6.08916	5.88974	5.73538	5.56627	5.90947	6.6327	6.63769	5.82014	1.12238	1.12323	0.984882	0.166566	0.16765	-0.0219767	0.0779757	0.0615679	0.0171245	0.038272
sp|P15559-3|NQO1_HUMAN	NQO1	NQO1_HUMAN Isoform 3 of NAD(P)H dehydrogenase [quinone] 1	23	5.83509	6.52158	5.19697	5.75356	7.19015	6.95826	6.31528	6.44223	7.05009	6.6469	6.20197	6.28006	6.5201	5.82615	5.91858	5.34303	5.8268	6.72648	6.54475	5.90197	1.1544	1.12322	1.0129	0.207148	0.167635	0.0184916	0.0932054	0.061811	0.0593976	0.0818755
sp|Q96C90|PP14B_HUMAN	PPP1R14B	PP14B_HUMAN Protein phosphatase 1 regulatory subunit 14B	4	5.56917	5.34605	6.45965	6.34397	5.76268	7.83354	8.34635	7.45912	6.76373	6.60789	7.33561	5.93315	4.54148	5.36564	5.37871	4.95325	5.92971	7.35042	6.6601	5.05977	1.23959	1.12317	0.853291	0.309866	0.167581	-0.22889	0.0935469	0.152267	0.0866115	0.0786629
sp|P40937|RFC5_HUMAN	RFC5	RFC5_HUMAN Replication factor C subunit 5	26	5.91898	6.61592	5.37261	5.57647	6.70099	7.45223	6.23822	6.57467	6.98665	6.80236	6.28471	6.29931	6.07003	5.93965	5.75983	5.40737	5.871	6.74153	6.59326	5.79422	1.14828	1.12302	0.986923	0.19947	0.167386	-0.0189906	0.0928955	0.0760181	0.053986	0.0496272
sp|Q07955-2|SRSF1_HUMAN	SRSF1	SRSF1_HUMAN Isoform ASF-2 of Serine/arginine-rich splicing factor 1	8	5.85282	6.82995	5.51201	5.40499	6.80894	7.78673	6.16538	6.58741	6.77257	7.24188	6.35429	6.13232	5.64315	6.0533	5.55083	5.30342	5.89994	6.83712	6.62526	5.63767	1.15884	1.12294	0.955547	0.212687	0.167277	-0.0656006	0.109958	0.100489	0.0738584	0.055343
sp|Q9NV35|NUD15_HUMAN	NUDT15	NUD15_HUMAN Probable 8-oxo-dGTP diphosphatase NUDT15	12	5.79626	6.53071	5.31461	5.86927	7.02178	6.86899	6.3198	6.27937	6.89768	6.52057	6.63101	6.34687	6.28057	5.8007	6.19486	5.32696	5.87771	6.62249	6.59903	5.90077	1.12671	1.12272	1.00392	0.172118	0.167	0.00564904	0.0850782	0.0571379	0.0349912	0.0738705
sp|O14681|EI24_HUMAN	EI24	EI24_HUMAN Etoposide-induced protein 2.4 homolog	3	5.90339	6.72446	5.61577	5.64196	6.77418	6.30953	6.34722	6.26547	6.74726	6.27214	6.84115	6.95613	5.64867	5.93468	6.42469	5.59329	5.9714	6.4241	6.70417	5.90033	1.07581	1.12271	0.9881	0.105426	0.166991	-0.0172717	0.0868415	0.0367002	0.0448107	0.0644433
sp|O95149|SPN1_HUMAN	SNUPN	SPN1_HUMAN Snurportin-1	2	6.1513	6.05009	5.46664	5.90312	7.05797	6.25577	6.3201	6.70053	7.35871	5.83466	6.54237	6.72767	6.29725	5.54557	6.4557	5.33257	5.89279	6.58359	6.61585	5.90777	1.11723	1.1227	1.00254	0.159925	0.166977	0.00366403	0.0512181	0.0565349	0.0947971	0.0934288
sp|Q86T82|UBP37_HUMAN	USP37	UBP37_HUMAN Ubiquitin carboxyl-terminal hydrolase 37	2	6.39923	5.89059	5.92732	5.43518	6.82623	6.65532	6.71725	6.52676	7.27076	6.64486	6.73615	5.90228	5.44461	6.45524	5.66359	5.50464	5.91308	6.68139	6.63851	5.76702	1.12993	1.12268	0.975299	0.176238	0.16695	-0.0360838	0.0666127	0.0187046	0.0848278	0.081155
sp|Q8N2K1|UB2J2_HUMAN	UBE2J2	UB2J2_HUMAN Ubiquitin-conjugating enzyme E2 J2	2	5.65937	6.64681	5.19273	6.48283	5.72886	7.20939	6.33027	6.64534	6.92945	7.47751	6.20563	6.31086	5.47056	5.95365	6.35412	5.40263	5.99544	6.47846	6.73086	5.79524	1.08057	1.12266	0.966609	0.111788	0.166927	-0.048996	0.114717	0.0954011	0.0878609	0.076976
sp|Q9UKZ1|CNO11_HUMAN	CNOT11	CNO11_HUMAN CCR4-NOT transcription complex subunit 11	2	5.4079	6.29295	6.57945	5.91615	6.07725	6.52479	5.90935	5.65452	6.54099	6.66132	7.25369	6.70701	5.95824	7.18941	5.59844	5.72855	6.04911	6.04148	6.79075	6.11866	0.998738	1.1226	1.0115	-0.00182207	0.166848	0.0164922	0.083727	0.060596	0.0466029	0.119171
sp|Q5SY16|NOL9_HUMAN	NOL9	NOL9_HUMAN Polynucleotide 5'-hydroxyl-kinase NOL9	6	5.66786	6.26877	6.23742	5.86361	6.40352	6.47191	6.20551	6.41934	6.62135	6.60736	6.92033	6.8307	5.89378	5.70973	6.17386	5.70494	6.00942	6.37507	6.74493	5.87058	1.06085	1.12239	0.976897	0.0852166	0.16658	-0.0337221	0.0487211	0.0183149	0.0230191	0.0375558
sp|Q96BR1|SGK3_HUMAN	SGK3	SGK3_HUMAN Serine/threonine-protein kinase Sgk3	1	5.44286	5.60439	6.29933	6.73234	6.36606	5.7082	5.72036	6.44781	6.65561	6.16626	6.5679	7.63409	6.36905	6.30686	6.19002	5.78887	6.01973	6.06061	6.75596	6.1637	1.00679	1.1223	1.02392	0.00976363	0.166463	0.0340979	0.100191	0.0662187	0.0922112	0.0422919
sp|Q8WUJ1|NEUFC_HUMAN	CYB5D2	NEUFC_HUMAN Neuferricin	1	5.86941	6.08861	5.22044	5.96582	6.36913	6.68385	6.11999	6.06843	6.88672	5.96757	6.71012	6.41034	6.25924	6.05329	6.62583	6.70122	5.78607	6.31035	6.49369	6.40989	1.09061	1.1223	1.10781	0.125136	0.166454	0.147717	0.0669901	0.0446086	0.0619224	0.0477773
sp|Q96IJ6-2|GMPPA_HUMAN	GMPPA	GMPPA_HUMAN Isoform 2 of Mannose-1-phosphate guanyltransferase alpha	14	5.9029	6.36503	5.47544	5.90433	6.78441	6.75073	5.89388	6.22653	6.78461	6.58923	6.50481	6.65991	6.4724	6.06324	5.91275	5.70981	5.91193	6.41389	6.63464	6.03955	1.08491	1.12225	1.02159	0.117571	0.16639	0.0308131	0.0614522	0.0671363	0.017844	0.0534586
sp|Q9HBU6|EKI1_HUMAN	ETNK1	EKI1_HUMAN Ethanolamine kinase 1	11	5.69933	6.20591	5.67459	6.03766	6.61111	6.93253	6.92463	6.87953	6.57808	6.4614	6.73334	6.72538	5.72282	5.66662	5.85978	5.2873	5.90437	6.83695	6.62455	5.63413	1.15795	1.12197	0.95423	0.211569	0.166039	-0.0675909	0.0441147	0.0222847	0.0196393	0.0434917
sp|P41214|EIF2D_HUMAN	EIF2D	EIF2D_HUMAN Eukaryotic translation initiation factor 2D	11	5.87772	6.50761	5.58552	5.84819	6.89599	6.96667	6.19446	6.30411	7.04983	6.59176	6.50043	6.58023	6.298	5.68134	5.77564	5.34251	5.95476	6.59031	6.68056	5.77437	1.10673	1.12189	0.969707	0.146302	0.165926	-0.0443792	0.0657069	0.0602952	0.0373479	0.0684986
sp|Q9UNH6-3|SNX7_HUMAN	SNX7	SNX7_HUMAN Isoform 3 of Sorting nexin-7	5	5.74275	6.45799	5.60604	5.94871	6.82255	6.61329	5.61044	5.8494	7.00193	6.29203	6.25018	7.10487	6.50403	6.16828	6.30579	5.72173	5.93887	6.22392	6.66225	6.17496	1.048	1.1218	1.03975	0.0676345	0.165821	0.0562401	0.0629144	0.0939883	0.0681347	0.0537813
sp|Q9NRL3|STRN4_HUMAN	STRN4	STRN4_HUMAN Striatin-4	10	5.83168	6.55816	5.53399	5.67959	6.51547	6.69745	6.20389	6.42766	6.45509	6.64444	6.80253	6.57377	6.32362	5.99933	6.14496	5.60837	5.90085	6.46112	6.61896	6.01907	1.09495	1.12169	1.02003	0.13086	0.16568	0.0286166	0.0770645	0.0317305	0.0219359	0.0505439
sp|Q9Y2D8|ADIP_HUMAN	SSX2IP	ADIP_HUMAN Afadin- and alpha-actinin-binding protein	4	5.32798	6.44897	5.7675	5.88153	7.10937	6.73767	5.72165	6.50129	6.54328	6.42282	6.96996	6.34009	6.37758	5.95946	6.10784	5.78299	5.85649	6.5175	6.56904	6.05697	1.11287	1.12167	1.03423	0.15428	0.165645	0.0485582	0.0787986	0.0900094	0.0426241	0.0415438
sp|Q9Y606|TRUA_HUMAN	PUS1	TRUA_HUMAN tRNA pseudouridine synthase A, mitochondrial	23	5.69259	6.43328	5.53283	6.11297	6.69129	6.90539	6.23545	6.47551	6.92038	6.49862	6.6344	6.60876	6.17654	5.71812	5.86561	5.49825	5.94292	6.57691	6.66554	5.81463	1.10668	1.12159	0.978413	0.146239	0.16555	-0.031484	0.0687093	0.0437038	0.0269767	0.0489452
sp|Q92851-4|CASPA_HUMAN	CASP10	CASPA_HUMAN Isoform D of Caspase-10	1	5.57993	6.39162	5.63547	6.0076	6.58741	6.62999	6.63513	7.00003	6.92695	5.96999	6.37144	7.21595	6.24427	5.17412	5.96522	5.66486	5.90365	6.71314	6.62108	5.76212	1.13712	1.12152	0.976025	0.185379	0.165459	-0.0350093	0.0638024	0.028668	0.084257	0.0794613
sp|Q6PHR2|ULK3_HUMAN	ULK3	ULK3_HUMAN Serine/threonine-protein kinase ULK3	4	5.33025	5.44883	5.15107	6.57325	6.35389	6.79682	6.3335	6.80872	6.10284	6.68055	6.04604	6.40687	6.41579	6.2945	5.80393	7.45315	5.62585	6.57323	6.30907	6.49184	1.1684	1.12144	1.15393	0.224532	0.165357	0.206557	0.114356	0.0403488	0.0465968	0.106798
sp|P55211|CASP9_HUMAN	CASP9	CASP9_HUMAN Caspase-9	1	5.95211	5.15428	6.12584	5.51052	6.18722	7.33224	5.58688	6.85951	6.94423	6.11483	6.1924	6.25114	6.70527	6.77941	5.51284	6.79126	5.68569	6.49146	6.37565	6.4472	1.14172	1.12135	1.13393	0.191209	0.165238	0.181337	0.0771867	0.117764	0.0600946	0.0967963
sp|Q13164|MK07_HUMAN	MAPK7	MK07_HUMAN Mitogen-activated protein kinase 7	4	5.80836	6.15763	5.76876	6.13263	6.22959	6.6385	6.53399	6.4016	6.68706	6.41138	6.80728	6.85602	6.24914	5.97777	6.00307	5.3372	5.96685	6.45092	6.69044	5.8918	1.08113	1.12127	0.987422	0.112537	0.165132	-0.0182611	0.0346501	0.0273677	0.0297629	0.0661026
sp|Q96RP9|EFGM_HUMAN	GFM1	EFGM_HUMAN Elongation factor G, mitochondrial	50	5.78142	6.26637	5.52872	5.98983	6.76136	6.8304	6.38169	6.41232	6.80518	6.68085	6.52483	6.41242	6.2263	5.84572	5.97493	5.57764	5.89159	6.59644	6.60582	5.90615	1.11964	1.12123	1.00247	0.163032	0.165082	0.00356158	0.0531281	0.0352229	0.0261233	0.0457252
tr|C9JTX5|C9JTX5_HUMAN	ACTB	C9JTX5_HUMAN Actin, cytoplasmic 1 (Fragment)	3	6.01634	5.75735	5.93421	6.34144	5.51755	6.36266	6.26093	5.93988	7.01309	6.61667	6.64651	6.68748	6.10722	6.89381	5.96162	5.94324	6.01234	6.02025	6.74094	6.22647	1.00132	1.12118	1.03562	0.0018992	0.165024	0.0504897	0.0406784	0.0632031	0.0272577	0.0724163
sp|P49770|EI2BB_HUMAN	EIF2B2	EI2BB_HUMAN Translation initiation factor eIF-2B subunit beta	8	5.82424	6.63764	5.31189	5.77672	6.71994	7.08369	6.18768	6.33191	6.84645	6.61226	6.34653	6.59786	6.26495	5.78469	5.99415	5.6794	5.88762	6.5808	6.60077	5.9308	1.11774	1.12113	1.00733	0.160579	0.16495	0.0105409	0.0935609	0.0613342	0.0309412	0.0435592
sp|Q8WU10|PYRD1_HUMAN	PYROXD1	PYRD1_HUMAN Pyridine nucleotide-disulfide oxidoreductase domain-containing protein 1	4	5.93822	6.29182	5.69363	5.98013	6.4865	6.3783	6.05183	6.54827	6.67985	6.62001	6.72419	6.76864	6.19752	5.88611	6.02436	5.73062	5.97595	6.36623	6.69817	5.95965	1.06531	1.12085	0.997273	0.0912701	0.164599	-0.00393987	0.0410937	0.0347232	0.00947664	0.0333672
sp|P61764-2|STXB1_HUMAN	STXBP1	STXB1_HUMAN Isoform 2 of Syntaxin-binding protein 1	17	5.76731	6.37157	5.5628	6.07126	6.63897	6.95344	6.4456	6.40304	6.73134	6.52174	6.64145	6.75081	5.97378	5.6412	5.96042	5.56525	5.94323	6.61026	6.66134	5.78516	1.11223	1.12083	0.973403	0.153459	0.164563	-0.0388909	0.0595313	0.0379358	0.0156942	0.0367197
sp|P12429|ANXA3_HUMAN	ANXA3	ANXA3_HUMAN Annexin A3	62	5.6968	6.23013	5.65381	5.98999	6.59764	6.5943	6.26161	6.39071	6.62736	6.50977	6.79551	6.4858	6.38763	5.84703	6.26115	5.67075	5.89268	6.46106	6.60461	6.04164	1.09646	1.12082	1.02528	0.132847	0.164549	0.0360157	0.0458268	0.0254532	0.0214252	0.0559935
sp|Q9P2N7-5|KLH13_HUMAN	KLHL13	KLH13_HUMAN Isoform 5 of Kelch-like protein 13	5	5.47593	6.19503	6.17809	6.17146	6.36951	6.70767	6.09096	6.10999	6.48309	7.30349	6.39371	6.73892	6.0122	6.25807	5.93116	5.58073	6.00513	6.31953	6.7298	5.94554	1.05236	1.12068	0.990077	0.073623	0.164369	-0.014387	0.0587728	0.045616	0.060846	0.0471153
sp|O15360|FANCA_HUMAN	FANCA	FANCA_HUMAN Fanconi anemia group A protein	7	5.70973	6.41078	5.67896	5.57283	6.87632	7.50773	6.39137	6.85285	6.71795	6.48736	6.48377	6.50306	5.87752	5.89451	5.40312	5.63212	5.84307	6.90707	6.54804	5.70182	1.18209	1.12065	0.975825	0.241346	0.164334	-0.0353059	0.0655454	0.066379	0.0173466	0.0407653
sp|Q9ULD0|OGDHL_HUMAN	OGDHL	OGDHL_HUMAN 2-oxoglutarate dehydrogenase-like, mitochondrial	5	6.15048	6.33116	5.33525	6.37449	6.65976	6.24282	6.53645	6.46503	7.20959	6.65505	6.58342	6.65919	5.98259	5.45739	5.79186	5.56546	6.04785	6.47602	6.77681	5.69932	1.0708	1.12053	0.942373	0.0986852	0.164186	-0.0856301	0.080172	0.0270287	0.0428826	0.0411806
sp|Q8N6R0|MET13_HUMAN	METTL13	MET13_HUMAN Methyltransferase-like protein 13	8	5.86786	6.66507	5.81388	5.76547	6.78637	7.01075	5.78512	6.20376	6.68982	6.59045	6.59297	7.14503	6.2261	5.56845	5.67785	5.61105	6.02807	6.4465	6.75457	5.77086	1.06941	1.12052	0.957332	0.0968199	0.164167	-0.0629092	0.070789	0.0863797	0.039142	0.0531659
sp|O14617-5|AP3D1_HUMAN	AP3D1	AP3D1_HUMAN Isoform 5 of AP-3 complex subunit delta-1	37	5.83684	6.50969	5.68305	5.87446	6.55702	7.14958	6.13676	6.41312	6.85025	6.75291	6.5254	6.65479	5.95799	5.93285	5.67294	5.49235	5.97601	6.56412	6.69584	5.76403	1.09841	1.12045	0.964529	0.135419	0.164082	-0.0521041	0.0611269	0.0651257	0.0207361	0.0385637
sp|Q13049|TRI32_HUMAN	TRIM32	TRI32_HUMAN E3 ubiquitin-protein ligase TRIM32	14	5.76983	6.4356	5.73003	5.72364	6.35993	7.26471	6.33939	6.43648	6.85645	6.9418	6.47817	6.23098	6.03857	6.11825	5.73213	5.54403	5.91477	6.60013	6.62685	5.85825	1.11587	1.12039	0.990443	0.158171	0.164	-0.0138548	0.0588049	0.067426	0.0501035	0.0456714
sp|Q9BQ70|TCF25_HUMAN	TCF25	TCF25_HUMAN Transcription factor 25	21	5.80079	6.56903	5.49678	5.86919	6.70263	7.12936	6.05997	6.3367	6.88673	6.67834	6.52321	6.50405	6.10655	5.9395	5.8232	5.57396	5.93395	6.55717	6.64808	5.8608	1.10503	1.12035	0.987673	0.14408	0.163946	-0.0178939	0.0763864	0.0706794	0.0266553	0.0381882
sp|O75600-2|KBL_HUMAN	GCAT	KBL_HUMAN Isoform 2 of 2-amino-3-ketobutyrate coenzyme A ligase, mitochondrial	6	5.75261	6.11347	5.88637	5.9739	6.60975	6.76967	6.26426	6.15001	6.89578	6.45951	6.6621	6.56281	6.11932	5.654	6.05703	6.06942	5.93159	6.44842	6.64505	5.97494	1.08713	1.12028	1.00731	0.120528	0.163862	0.0105066	0.0255584	0.0449626	0.0280657	0.0360922
sp|Q8IZV5|RDH10_HUMAN	RDH10	RDH10_HUMAN Retinol dehydrogenase 10	5	5.77181	6.4219	5.67671	6.15247	6.64985	6.86468	6.21471	6.24914	6.38572	6.73551	6.70451	7.08563	5.87434	5.8584	5.79954	5.55507	6.00572	6.4946	6.72784	5.77184	1.0814	1.12024	0.961056	0.112902	0.163806	-0.0573071	0.0574957	0.0486626	0.0425337	0.0256502
sp|Q9BTX1|NDC1_HUMAN	NDC1	NDC1_HUMAN Nucleoporin NDC1	17	5.88911	6.15654	5.70203	6.02363	6.5898	6.96889	6.58838	6.44042	6.61856	6.68311	6.61072	6.71572	5.98892	5.70371	5.80448	5.516	5.94283	6.64687	6.65703	5.75328	1.11847	1.12018	0.968104	0.161526	0.163729	-0.0467654	0.032668	0.0339753	0.00763464	0.0343118
sp|Q13509|TBB3_HUMAN	TUBB3	TBB3_HUMAN Tubulin beta-3 chain	124	5.71731	6.55329	5.53568	5.79727	6.56248	7.06363	6.13501	6.41704	6.85502	6.71943	6.50935	6.35413	6.1975	5.96977	6.00105	5.61204	5.90089	6.54454	6.60948	5.94509	1.10908	1.12008	1.00749	0.14936	0.163605	0.0107667	0.0760046	0.0594247	0.0335604	0.0410153
sp|Q8ND76|CCNY_HUMAN	CCNY	CCNY_HUMAN Cyclin-Y	2	5.4651	6.86997	6.73106	5.80416	6.5434	6.37354	5.70613	5.96224	7.00414	6.64313	6.85814	7.34904	5.58688	5.1828	5.778	6.14227	6.21757	6.14633	6.96361	5.67249	0.988541	1.11999	0.912332	-0.0166268	0.163484	-0.13237	0.110903	0.0620929	0.0426022	0.0704387
sp|Q9NSE4|SYIM_HUMAN	IARS2	SYIM_HUMAN Isoleucine--tRNA ligase, mitochondrial	48	5.70529	6.37499	5.54009	5.98724	6.76208	6.97364	6.38918	6.46043	6.94691	6.39745	6.54065	6.55323	6.19114	5.73486	6.05665	5.38617	5.9019	6.64633	6.60956	5.8422	1.12613	1.1199	0.989885	0.171378	0.163374	-0.0146671	0.0619206	0.0408568	0.0356662	0.0614963
sp|Q96SB4|SRPK1_HUMAN	SRPK1	SRPK1_HUMAN SRSF protein kinase 1	15	5.83944	6.27388	5.57504	5.81388	6.71611	7.11122	6.1611	6.32403	6.86524	6.51943	6.4811	6.45174	6.31907	5.92171	6.07055	5.55645	5.87556	6.57812	6.57938	5.96695	1.11957	1.11979	1.01555	0.162948	0.163225	0.0222661	0.0495308	0.064598	0.0292702	0.0534608
sp|Q9UID3|VPS51_HUMAN	VPS51	VPS51_HUMAN Vacuolar protein sorting-associated protein 51 homolog	14	5.91895	6.58332	5.57211	5.83261	6.53759	6.98919	6.13267	6.2756	6.82223	6.8032	6.51292	6.63148	6.09388	5.78444	5.92779	5.58202	5.97675	6.48376	6.69246	5.84703	1.08483	1.11975	0.978297	0.117471	0.163175	-0.031656	0.0720154	0.0580473	0.0220039	0.0371572
sp|Q8N5C7|DTWD1_HUMAN	DTWD1	DTWD1_HUMAN DTW domain-containing protein 1	4	6.18172	6.68656	5.43938	5.65217	7.11327	7.12115	6.31843	5.83912	6.88775	7.19526	6.11878	6.62632	5.95582	5.26177	5.7962	5.8063	5.98996	6.59799	6.70703	5.70502	1.10151	1.11971	0.952431	0.139481	0.163128	-0.0703132	0.0934135	0.0955857	0.067976	0.0533531
sp|Q9UPR0|PLCL2_HUMAN	PLCL2	PLCL2_HUMAN Inactive phospholipase C-like protein 2	1	6.66159	6.11734	5.06878	5.52148	6.98368	6.0828	5.98652	7.03016	7.02304	6.76364	6.29092	6.08816	6.4978	5.66072	5.56383	6.65955	5.8423	6.52079	6.54144	6.09547	1.11613	1.11967	1.04334	0.158511	0.163072	0.0612028	0.118922	0.0863437	0.065428	0.0924023
sp|Q96CM8|ACSF2_HUMAN	ACSF2	ACSF2_HUMAN Acyl-CoA synthetase family member 2, mitochondrial	9	5.65646	6.09701	5.62494	6.03522	6.73928	6.82106	6.51468	6.23528	6.96708	6.432	6.48859	6.32742	6.3705	5.70885	6.16175	5.81987	5.85341	6.57758	6.55377	6.01524	1.12372	1.11965	1.02765	0.168279	0.163049	0.0393462	0.0422387	0.0398925	0.0432592	0.050763
sp|Q8TB37|NUBPL_HUMAN	NUBPL	NUBPL_HUMAN Iron-sulfur protein NUBPL	7	6.0761	6.75217	5.73824	5.58064	6.70344	7.24333	6.41424	6.40611	7.05711	6.76433	6.91385	6.30049	5.54071	5.71784	5.4329	5.35852	6.03679	6.69178	6.75894	5.51249	1.1085	1.11963	0.91315	0.148609	0.163017	-0.131076	0.0861024	0.0587055	0.048555	0.028299
sp|Q9H944|MED20_HUMAN	MED20	MED20_HUMAN Mediator of RNA polymerase II transcription subunit 20	6	5.63414	5.94772	6.00377	6.26253	6.49354	6.30151	6.80541	6.42488	6.55174	6.50921	6.80393	6.83582	5.69082	5.9394	6.18953	5.60604	5.96204	6.50633	6.67517	5.85645	1.09129	1.11961	0.982289	0.126039	0.163	-0.0257803	0.043281	0.0329878	0.0252411	0.0449569
sp|Q93050-3|VPP1_HUMAN	ATP6V0A1	VPP1_HUMAN Isoform 3 of V-type proton ATPase 116 kDa subunit a isoform 1	15	5.81174	6.38851	5.54636	6.02711	6.82962	6.89386	6.42487	6.36315	6.80115	6.7772	6.52373	6.51356	6.08866	5.81369	5.79333	5.40345	5.94343	6.62788	6.65391	5.77478	1.11516	1.11954	0.971625	0.157251	0.162907	-0.0415292	0.05989	0.0411115	0.0235277	0.0488015
sp|Q9BVK2|ALG8_HUMAN	ALG8	ALG8_HUMAN Probable dolichyl pyrophosphate Glc1Man9GlcNAc2 alpha-1,3-glucosyltransferase	3	5.63453	6.02867	5.46419	6.04205	6.77555	7.32104	6.51098	6.418	6.37218	6.37346	6.43845	6.75272	6.06652	5.80386	5.81929	6.1785	5.79236	6.75639	6.4842	5.96704	1.16643	1.11944	1.03016	0.222102	0.162778	0.0428648	0.0499162	0.0600561	0.0280167	0.0310631
sp|Q5VW36|FOCAD_HUMAN	FOCAD	FOCAD_HUMAN Focadhesin	13	5.50932	6.25955	6.05731	6.00078	6.65965	6.93856	6.43191	6.7244	7.03011	6.64205	6.34953	6.64742	5.94612	5.8286	5.67313	5.30156	5.95674	6.68863	6.66728	5.68735	1.12287	1.11928	0.954776	0.167188	0.162575	-0.0667658	0.0534342	0.031181	0.0418568	0.0493104
sp|Q96A72|MGN2_HUMAN	MAGOHB	MGN2_HUMAN Protein mago nashi homolog 2	13	5.6747	6.15319	5.6617	5.88264	6.79673	7.23623	6.46814	6.22845	6.72429	6.76556	6.47849	6.18991	6.37939	5.85712	5.93301	5.57044	5.84306	6.68239	6.53956	5.93499	1.14365	1.1192	1.01573	0.19364	0.162471	0.0225221	0.0393981	0.0653313	0.0405717	0.0564265
sp|P42345|MTOR_HUMAN	MTOR	MTOR_HUMAN Serine/threonine-protein kinase mTOR	44	5.71843	6.41295	5.50104	5.9441	6.60486	6.94797	6.15404	6.5393	6.73586	6.61262	6.53798	6.49951	6.3538	5.84469	5.89567	5.69719	5.89413	6.56154	6.59649	5.94784	1.11323	1.11916	1.00911	0.154756	0.16242	0.0130864	0.0662227	0.0495998	0.0157817	0.0476519
sp|O14727|APAF_HUMAN	APAF1	APAF_HUMAN Apoptotic protease-activating factor 1	8	5.52916	6.4518	5.55742	6.30792	6.64971	6.66653	6.02738	6.13929	6.95594	6.41521	6.52193	6.79444	6.12649	6.11347	5.86321	5.88008	5.96157	6.37073	6.67188	5.99581	1.06863	1.11915	1.00574	0.0957646	0.1624	0.00826174	0.0816377	0.0525926	0.0371269	0.0239567
sp|Q8IWW6-3|RHG12_HUMAN	ARHGAP12	RHG12_HUMAN Isoform 3 of Rho GTPase-activating protein 12	1	6.10374	6.20004	5.88671	6.29907	6.19571	6.85739	6.21727	6.11776	6.87674	6.95663	7.09593	6.47778	5.24609	5.66927	6.5552	5.24465	6.12239	6.34703	6.85177	5.6788	1.03669	1.11913	0.927547	0.0519873	0.162382	-0.108508	0.0287794	0.0540273	0.0387153	0.108736
sp|Q8NBM4|UBAC2_HUMAN	UBAC2	UBAC2_HUMAN Ubiquitin-associated domain-containing protein 2	7	5.38228	6.6205	5.47009	5.82431	6.76859	7.46835	6.62979	6.67231	6.5041	6.76215	6.38545	6.41893	6.18845	5.63955	5.84693	5.41821	5.8243	6.88476	6.51766	5.77328	1.18208	1.11905	0.991242	0.241323	0.16227	-0.012691	0.0968608	0.0571362	0.026156	0.0567251
sp|Q9H4B7|TBB1_HUMAN	TUBB1	TBB1_HUMAN Tubulin beta-1 chain	32	5.81237	6.5847	5.43731	5.93835	6.65748	7.1503	6.18866	6.5338	6.62084	7.09154	6.5392	6.34755	6.08511	5.77721	5.72185	5.51374	5.94318	6.63256	6.64978	5.77448	1.11599	1.11889	0.971614	0.15833	0.162071	-0.0415453	0.0803775	0.0600237	0.0475197	0.0408898
sp|Q6XUX3|DUSTY_HUMAN	DSTYK	DUSTY_HUMAN Dual serine/threonine and tyrosine protein kinase	1	5.19008	5.71784	5.7224	7.08378	6.03697	6.69709	5.42285	6.92326	7.42256	7.31495	5.30754	6.48811	6.44669	5.44251	6.0802	6.70318	5.92853	6.27004	6.63329	6.16814	1.05761	1.11888	1.04042	0.080802	0.162051	0.0571635	0.136575	0.108214	0.147357	0.0887063
sp|O95202|LETM1_HUMAN	LETM1	LETM1_HUMAN LETM1 and EF-hand domain-containing protein 1, mitochondrial	46	5.67072	6.05332	5.88042	6.08504	6.43514	6.55722	6.74123	6.53932	6.35217	7.02221	6.87564	6.25459	5.97017	5.95613	6.00465	5.60202	5.92237	6.56823	6.62615	5.88324	1.10905	1.11883	0.993392	0.149328	0.161996	-0.00956434	0.0321405	0.0193778	0.0572843	0.0320549
sp|Q9BZE1|RM37_HUMAN	MRPL37	RM37_HUMAN 39S ribosomal protein L37, mitochondrial	22	5.85325	6.54582	5.40775	5.9309	6.65315	6.65858	6.52468	6.33282	6.94989	6.25551	6.693	6.65676	6.3501	5.53201	6.40214	5.25364	5.93443	6.54231	6.63879	5.88447	1.10243	1.11869	0.991582	0.14069	0.161811	-0.0121964	0.078905	0.0233486	0.0432169	0.0984554
sp|O75323|NIPS2_HUMAN	GBAS	NIPS2_HUMAN Protein NipSnap homolog 2	7	5.79321	6.28502	5.62725	6.32917	6.64193	6.68157	6.72972	6.70387	6.8435	6.24741	6.71553	7.07979	5.76066	5.02809	6.14001	5.39326	6.00866	6.68927	6.72156	5.58051	1.11327	1.11864	0.928743	0.154805	0.161752	-0.106648	0.0585255	0.00555994	0.0521104	0.0856724
sp|Q92777|SYN2_HUMAN	SYN2	SYN2_HUMAN Synapsin-2	2	5.96105	6.04309	5.93932	5.58834	7.12162	5.89127	6.22657	6.48465	6.61327	6.96446	6.58525	6.15859	6.43233	6.08919	5.58535	6.31566	5.88295	6.43103	6.58039	6.10563	1.09316	1.11855	1.03785	0.128509	0.161634	0.053601	0.0342389	0.0809444	0.0501359	0.0614138
tr|C9J2U4|C9J2U4_HUMAN	TAMM41	C9J2U4_HUMAN Chromosome 3 open reading frame 31, isoform CRA_f	4	5.26792	6.5637	5.65764	6.28351	6.59565	7.46273	6.29341	6.45493	6.51606	7.08748	6.87222	6.11529	5.86045	5.67277	5.58575	5.7105	5.94319	6.70168	6.64776	5.70737	1.12762	1.11855	0.96032	0.173285	0.161631	-0.0584126	0.0989914	0.0779175	0.0640921	0.0200876
sp|Q99661|KIF2C_HUMAN	KIF2C	KIF2C_HUMAN Kinesin-like protein KIF2C	14	5.95378	6.1675	5.64025	5.83897	6.73317	6.60774	6.49577	6.64666	6.94183	6.34182	6.52132	6.5817	6.16704	5.89826	6.05192	5.41228	5.90013	6.62084	6.59667	5.88237	1.12215	1.11806	0.996992	0.166268	0.160992	-0.00434676	0.0373442	0.0148752	0.0381483	0.0564696
sp|O43422|P52K_HUMAN	PRKRIR	P52K_HUMAN 52 kDa repressor of the inhibitor of the protein kinase	6	5.32103	6.66156	6.02644	5.90097	6.34205	6.62341	6.62511	6.83989	7.11693	6.51573	6.7507	6.34917	5.97744	5.97707	5.96498	5.0075	5.9775	6.60762	6.68313	5.73175	1.10541	1.11805	0.958887	0.144587	0.160982	-0.0605672	0.0919936	0.0308962	0.0497995	0.0842442
sp|O14802|RPC1_HUMAN	POLR3A	RPC1_HUMAN DNA-directed RNA polymerase III subunit RPC1	24	5.80515	6.36906	5.68629	6.0423	6.52996	6.82073	6.19928	6.33409	6.92775	6.73355	6.58829	6.47461	6.14207	5.84855	5.92671	5.5716	5.9757	6.47102	6.68105	5.87223	1.08289	1.11804	0.982685	0.114884	0.160967	-0.0251986	0.0503901	0.0416924	0.0292846	0.040145
sp|O14925|TIM23_HUMAN	TIMM23	TIM23_HUMAN Mitochondrial import inner membrane translocase subunit Tim23	8	6.02218	6.65675	5.45859	5.56042	6.66175	7.41285	6.23846	6.59142	6.79854	6.82825	6.4967	6.37065	5.78163	5.7661	6.12434	5.23138	5.92448	6.72612	6.62354	5.72586	1.13531	1.11799	0.966474	0.183085	0.160912	-0.0491967	0.0922119	0.0734244	0.0340477	0.0644084
sp|Q9HAU8|RNPL1_HUMAN	RNPEPL1	RNPL1_HUMAN Arginyl aminopeptidase-like 1	1	7.193	6.14499	5.89863	6.05682	5.19517	5.71032	5.61642	6.12325	7.49556	7.13859	5.90984	7.73353	6.54483	5.18096	7.0026	5.05549	6.32336	5.66129	7.06938	5.94597	0.895298	1.11798	0.940318	-0.159561	0.160892	-0.0887792	0.0930914	0.0672689	0.114688	0.164017
sp|Q8NCE0|SEN2_HUMAN	TSEN2	SEN2_HUMAN tRNA-splicing endonuclease subunit Sen2	17	5.80593	6.28262	5.74271	6.0906	6.34774	6.55663	6.44101	6.51192	6.9073	6.22835	6.78269	6.82133	5.92671	5.85469	6.23839	5.46137	5.98047	6.46432	6.68492	5.87029	1.08091	1.11779	0.981578	0.112242	0.160652	-0.0268259	0.0421267	0.0140994	0.0461938	0.0544176
sp|Q86VP6|CAND1_HUMAN	CAND1	CAND1_HUMAN Cullin-associated NEDD8-dissociated protein 1	77	5.77863	6.51564	5.60037	5.86627	6.8226	7.12155	6.44174	6.60507	6.8836	6.62402	6.58355	6.46681	5.89047	5.64286	5.83576	5.32107	5.94023	6.74774	6.63949	5.67254	1.13594	1.11772	0.954936	0.183886	0.160555	-0.0665233	0.0672101	0.0435719	0.0264864	0.0453516
sp|O95785|WIZ_HUMAN	WIZ	WIZ_HUMAN Protein Wiz	10	5.58926	6.20305	6.16364	6.18553	6.34337	7.02012	6.53822	6.49437	6.71731	6.91736	7.10651	6.24141	5.40008	5.84305	5.79283	5.44388	6.03537	6.59902	6.74565	5.61996	1.09339	1.11769	0.931171	0.12881	0.160515	-0.102882	0.0493496	0.0443819	0.055121	0.0409648
sp|Q8N448|LNX2_HUMAN	LNX2	LNX2_HUMAN Ligand of Numb protein X 2	6	5.6141	6.1576	5.83852	6.25449	6.44674	6.67156	6.38979	6.0903	6.5703	6.74121	6.72463	6.63582	6.31849	6.08875	5.88791	5.56978	5.96618	6.3996	6.66799	5.96623	1.07265	1.11763	1.00001	0.101174	0.160445	1.32996e-05	0.0493455	0.0374097	0.0119812	0.0532149
sp|Q86Y37|CACL1_HUMAN	CACUL1	CACL1_HUMAN CDK2-associated and cullin domain-containing protein 1	6	5.82311	5.69389	6.29288	6.07189	6.13985	5.85161	6.18146	6.47992	6.55797	6.60837	6.73744	6.78396	6.23616	5.73769	6.19903	6.60477	5.97044	6.16321	6.67194	6.19441	1.03229	1.11749	1.03751	0.0458441	0.160267	0.0531296	0.0445715	0.0417129	0.0159253	0.0573611
sp|Q9BQB6|VKOR1_HUMAN	VKORC1	VKOR1_HUMAN Vitamin K epoxide reductase complex subunit 1	1	6.22779	6.69046	5.07987	5.47842	8.10861	7.14658	6.08649	6.39663	6.13672	6.93898	7.15054	6.0081	5.92316	5.95166	5.66349	5.01248	5.86913	6.93458	6.55858	5.6377	1.18153	1.11747	0.960567	0.24066	0.160237	-0.0580418	0.123603	0.129836	0.086972	0.077427
sp|Q96CU9|FXRD1_HUMAN	FOXRED1	FXRD1_HUMAN FAD-dependent oxidoreductase domain-containing protein 1	10	5.8436	6.1883	5.64194	6.06935	6.56862	6.73157	6.21509	6.18561	6.9249	6.7895	6.31848	6.49931	6.28579	5.98276	6.09438	5.6608	5.9358	6.42522	6.63305	6.00593	1.08245	1.11747	1.01182	0.114305	0.16023	0.0169464	0.040857	0.0417599	0.0414242	0.0436092
sp|Q96BD8|SKA1_HUMAN	SKA1	SKA1_HUMAN Spindle and kinetochore-associated protein 1	5	5.67396	6.51682	5.86479	5.99918	6.43184	6.4936	6.10199	6.31509	6.70923	6.50046	6.71932	6.95123	6.44078	5.76162	6.10203	5.41806	6.01369	6.33563	6.72006	5.93062	1.05353	1.11746	0.986187	0.0752382	0.160224	-0.0200664	0.0600278	0.0272196	0.0274095	0.0741991
sp|Q96DX4|RSPRY_HUMAN	RSPRY1	RSPRY_HUMAN RING finger and SPRY domain-containing protein 1	1	5.17939	6.04411	6.32323	5.75172	5.89282	6.03592	7.43637	6.39305	8.91898	5.47891	5.16363	6.47301	6.10595	5.5385	7.31304	5.95136	5.82461	6.43954	6.50863	6.22721	1.10557	1.11744	1.06912	0.144796	0.160192	0.0964244	0.0840161	0.108246	0.261348	0.122444
sp|O60294|LCMT2_HUMAN	LCMT2	LCMT2_HUMAN Leucine carboxyl methyltransferase 2	3	6.03363	6.80731	5.16103	6.15238	6.71406	7.24879	5.65423	5.84837	6.78711	6.19057	6.78994	7.2196	5.50859	6.26477	5.55143	6.0682	6.03859	6.36636	6.74681	5.84825	1.05428	1.11728	0.968479	0.0762582	0.159993	-0.0462068	0.112073	0.11737	0.0626748	0.0643844
sp|P22695|QCR2_HUMAN	UQCRC2	QCR2_HUMAN Cytochrome b-c1 complex subunit 2, mitochondrial	30	5.88815	6.46699	5.54762	5.85128	6.70072	6.95141	6.16581	6.34763	6.98301	6.7073	6.36144	6.48817	6.13814	5.92838	5.88187	5.59207	5.93851	6.54139	6.63498	5.88511	1.10152	1.11728	0.991009	0.139497	0.159991	-0.0130304	0.0646527	0.0538397	0.0410669	0.03822
sp|Q8TAK5|GABP2_HUMAN	GABPB2	GABP2_HUMAN GA-binding protein subunit beta-2	2	5.66192	5.77578	5.06416	6.65617	6.93188	7.3336	5.9317	5.68926	6.54473	6.16218	6.59477	6.57093	6.77178	5.76776	6.82885	5.71451	5.78951	6.47161	6.46815	6.27072	1.11782	1.11722	1.08312	0.160684	0.159913	0.115192	0.113426	0.121619	0.0316942	0.0976518
sp|Q6NSJ5|LRC8E_HUMAN	LRRC8E	LRC8E_HUMAN Leucine-rich repeat-containing protein 8E	14	5.7061	6.43912	5.67161	6.15623	6.61547	6.85838	6.29316	6.48348	6.85637	6.68793	6.55722	6.68147	5.97178	5.54622	5.99992	5.47554	5.99327	6.56262	6.69575	5.74836	1.095	1.11721	0.959137	0.13093	0.159903	-0.0601905	0.0617788	0.0361813	0.018343	0.0480097
sp|Q6IBW4-4|CNDH2_HUMAN	NCAPH2	CNDH2_HUMAN Isoform 4 of Condensin-2 complex subunit H2	2	5.85952	6.74559	5.18733	5.97973	6.56899	7.29814	6.00546	5.86261	5.88964	6.80015	6.87414	6.98642	6.00364	6.58378	5.41534	5.93952	5.94304	6.4338	6.63759	5.98557	1.08258	1.11687	1.00716	0.114469	0.159457	0.0102869	0.107457	0.101331	0.0760032	0.0798595
sp|Q96L92|SNX27_HUMAN	SNX27	SNX27_HUMAN Sorting nexin-27	16	5.84185	6.38747	5.61298	5.89595	6.63223	6.71941	6.29737	6.21522	6.97033	6.47023	6.35579	6.71508	6.30567	5.97252	6.03248	5.57542	5.93456	6.46606	6.62786	5.97152	1.08956	1.11682	1.00623	0.123745	0.159401	0.00895713	0.0549151	0.038215	0.0412059	0.0504491
sp|Q8TCY9|URGCP_HUMAN	URGCP	URGCP_HUMAN Up-regulator of cell proliferation	10	5.69156	6.25368	5.65645	6.08216	6.46515	6.869	6.22484	6.37611	6.57611	6.54392	6.63056	6.6994	6.11736	6.12909	5.87915	5.80547	5.92096	6.48378	6.6125	5.98277	1.09505	1.11679	1.01044	0.131002	0.159364	0.0149813	0.0496512	0.0424611	0.0102959	0.0275828
sp|Q9NVF9-2|EKI2_HUMAN	ETNK2	EKI2_HUMAN Isoform 2 of Ethanolamine kinase 2	1	6.45352	5.96447	6.58237	4.91366	5.8797	6.08362	5.9026	5.32664	6.72516	6.13086	7.28561	6.56426	6.73048	6.63405	7.28478	5.53824	5.97851	5.79814	6.67647	6.54689	0.969831	1.11675	1.09507	-0.0441946	0.159301	0.131024	0.126813	0.0564491	0.0715033	0.111659
sp|P51589|CP2J2_HUMAN	CYP2J2	CP2J2_HUMAN Cytochrome P450 2J2	2	6.52518	7.05806	5.77346	5.21825	6.94831	6.78138	5.69956	5.66782	7.46416	6.68254	6.66651	6.63025	5.92579	5.99337	5.7082	5.25717	6.14374	6.27427	6.86086	5.72113	1.02125	1.11672	0.931214	0.0303305	0.159274	-0.102816	0.13207	0.109249	0.0587085	0.0580966
sp|Q96IL0|APOP1_HUMAN	APOPT1	APOP1_HUMAN Apoptogenic protein 1, mitochondrial	1	5.96986	5.53929	6.11916	6.42677	6.29001	5.8356	5.60423	5.85656	6.67008	6.23846	7.10211	6.85109	7.12953	6.41504	5.47839	6.47383	6.01377	5.8966	6.71543	6.3742	0.980516	1.11668	1.05993	-0.0283864	0.159211	0.083974	0.0613781	0.0485211	0.0542031	0.10658
sp|O15440|MRP5_HUMAN	ABCC5	MRP5_HUMAN Multidrug resistance-associated protein 5	4	5.67009	6.55433	6.26965	5.7	5.72745	6.49208	6.41156	5.58676	7.06139	6.50065	6.94874	6.50474	6.38767	6.48929	6.12801	5.5676	6.04852	6.05446	6.75388	6.14314	1.00098	1.11662	1.01564	0.00141731	0.159135	0.0223953	0.0720288	0.0765678	0.0434819	0.0671889
sp|Q9HBH0|RHOF_HUMAN	RHOF	RHOF_HUMAN Rho-related GTP-binding protein RhoF	14	5.42129	5.87448	6.14418	6.23349	6.2982	6.42851	6.43745	6.29959	6.59128	6.37807	6.56699	6.8971	6.14618	6.06089	6.26006	5.96225	5.91836	6.36594	6.60836	6.10735	1.07563	1.11659	1.03193	0.105176	0.159095	0.0453479	0.061644	0.0121745	0.0325031	0.0207201
sp|P31150|GDIA_HUMAN	GDI1	GDIA_HUMAN Rab GDP dissociation inhibitor alpha	42	5.84425	6.20282	5.76939	6.0101	6.57382	6.88267	6.51846	6.38562	6.77365	6.62976	6.58287	6.61191	5.98742	5.58644	5.99047	5.65033	5.95664	6.59014	6.64955	5.80366	1.10635	1.11633	0.974319	0.145811	0.158757	-0.0375345	0.0323151	0.0319267	0.0127771	0.037137
sp|Q99536|VAT1_HUMAN	VAT1	VAT1_HUMAN Synaptic vesicle membrane protein VAT-1 homolog	34	5.64281	6.24376	5.74797	5.90943	6.52728	6.88769	6.33672	6.44948	6.67564	6.76177	6.6201	6.22472	6.06712	6.02403	6.26048	5.62099	5.88599	6.55029	6.57056	5.99315	1.11286	1.1163	1.01821	0.154274	0.15873	0.02603	0.0445991	0.0363568	0.0361935	0.0448132
sp|O60488|ACSL4_HUMAN	ACSL4	ACSL4_HUMAN Long-chain-fatty-acid--CoA ligase 4	37	5.73826	6.30689	5.61417	6.02741	6.75931	7.03308	6.36136	6.54981	6.96336	6.45452	6.47791	6.54425	6.18298	5.57773	5.91776	5.49122	5.92168	6.67589	6.61001	5.79242	1.12736	1.11624	0.978172	0.172953	0.158645	-0.0318403	0.0523019	0.0431868	0.0360987	0.0550519
sp|Q12931|TRAP1_HUMAN	TRAP1	TRAP1_HUMAN Heat shock protein 75 kDa, mitochondrial	92	5.79907	6.45108	5.47769	5.85132	6.78631	7.17151	6.49148	6.48703	6.89407	6.63501	6.47687	6.31322	6.07283	5.79496	5.91643	5.38113	5.89479	6.73408	6.57979	5.79134	1.14238	1.1162	0.98245	0.192041	0.158602	-0.0255438	0.0688726	0.0480396	0.0375849	0.0511421
sp|Q9GZR2|REXO4_HUMAN	REXO4	REXO4_HUMAN RNA exonuclease 4	1	5.68537	6.0348	5.81865	6.30313	6.3147	5.8319	6.44117	6.43569	6.79547	6.6037	6.82807	6.38398	6.29236	6.83074	5.79661	5.60365	5.96049	6.25587	6.65281	6.13084	1.04956	1.11615	1.02858	0.069779	0.158532	0.0406544	0.0453018	0.0461339	0.0307742	0.0896158
sp|Q5D1E8|ZC12A_HUMAN	ZC3H12A	ZC12A_HUMAN Ribonuclease ZC3H12A	1	6.09211	7.25162	5.42213	6.65355	6.37414	6.98333	6.15918	5.84558	6.77874	6.6666	7.76407	7.16152	5.76938	5.6922	5.23506	4.15079	6.35485	6.34056	7.09273	5.21186	0.997751	1.11611	0.820138	-0.00324894	0.158483	-0.286061	0.122983	0.075757	0.0698149	0.143067
sp|P35475|IDUA_HUMAN	IDUA	IDUA_HUMAN Alpha-L-iduronidase	3	5.44548	6.10653	6.08369	6.05451	6.18454	7.10649	6.38941	6.16683	6.49355	6.29271	7.63395	6.02059	5.68736	6.69292	6.01904	5.62239	5.92255	6.46182	6.6102	6.00543	1.09105	1.11611	1.01399	0.125721	0.158475	0.0200479	0.0538214	0.0683232	0.107332	0.0816164
sp|Q8IZ81|ELMD2_HUMAN	ELMOD2	ELMD2_HUMAN ELMO domain-containing protein 2	15	5.67493	6.35502	5.77036	6.108	6.54269	6.84093	6.50318	6.3704	6.89188	6.52441	6.67517	6.59251	6.05346	5.62628	5.94402	5.52675	5.97708	6.5643	6.67099	5.78763	1.09825	1.1161	0.968304	0.135201	0.158461	-0.0464682	0.0523756	0.0302543	0.0239305	0.0433928
sp|Q15031|SYLM_HUMAN	LARS2	SYLM_HUMAN Probable leucine--tRNA ligase, mitochondrial	27	5.74733	6.479	5.47013	5.93874	6.69666	6.817	6.10015	6.53101	6.71299	6.65646	6.42457	6.58452	6.1585	5.90308	5.98622	5.79364	5.9088	6.53621	6.59464	5.96036	1.10618	1.11607	1.00873	0.145588	0.158428	0.0125343	0.0721025	0.0479568	0.0189507	0.0258113
sp|P18858|DNLI1_HUMAN	LIG1	DNLI1_HUMAN DNA ligase 1	31	5.81309	6.31728	5.67997	5.92514	6.66041	6.94639	6.20849	6.31683	6.70595	6.3561	6.91103	6.51659	6.11552	5.82695	5.93686	5.76342	5.93387	6.53303	6.62242	5.91069	1.10097	1.11604	0.996093	0.138779	0.158385	-0.00564737	0.0462682	0.0514668	0.0361985	0.0260898
sp|Q6DN03|H2B2C_HUMAN	HIST2H2BC	H2B2C_HUMAN Putative histone H2B type 2-C	2	5.77621	6.80191	5.46801	5.42379	6.54337	6.49765	5.77696	5.98307	6.71075	6.54118	6.42034	6.51976	6.75663	6.25967	6.35982	6.16089	5.86748	6.20026	6.54801	6.38425	1.05672	1.11598	1.08807	0.0795883	0.158315	0.121777	0.10948	0.0612396	0.0184169	0.0409129
sp|Q13370|PDE3B_HUMAN	PDE3B	PDE3B_HUMAN cGMP-inhibited 3',5'-cyclic phosphodiesterase B	2	5.13099	6.4266	6.688	6.43111	5.96164	5.5306	5.84927	5.89054	6.86577	8.00526	6.26753	6.39921	6.29249	6.01273	6.35821	5.89007	6.16918	5.80801	6.88444	6.13837	0.941457	1.11594	0.995007	-0.087033	0.158262	-0.00722079	0.113925	0.0328298	0.114761	0.0363695
sp|A0PJW6|TM223_HUMAN	TMEM223	TM223_HUMAN Transmembrane protein 223	1	4.69526	6.1566	6.72938	6.08885	6.60494	6.01879	6.7337	5.76089	6.66286	6.06289	7.36243	6.32538	7.19216	6.41281	5.99879	5.19428	5.91752	6.27958	6.60339	6.19951	1.06118	1.1159	1.04765	0.0856748	0.158214	0.0671609	0.146009	0.0740758	0.0851786	0.134364
sp|Q9H0R6|GATA_HUMAN	QRSL1	GATA_HUMAN Glutamyl-tRNA(Gln) amidotransferase subunit A, mitochondrial	15	5.70263	6.39265	5.59151	5.92585	6.61659	7.03282	6.30585	6.47872	6.62089	6.61447	6.44748	6.66446	6.1668	5.74205	5.97898	5.71825	5.90316	6.60849	6.58682	5.90152	1.11948	1.11581	0.999722	0.162834	0.158096	-0.000400861	0.0600878	0.0469299	0.0145008	0.0359975
sp|O14975|S27A2_HUMAN	SLC27A2	S27A2_HUMAN Very long-chain acyl-CoA synthetase	12	5.83158	6.18387	5.61633	6.03835	6.67259	7.00978	6.4862	6.17076	6.76507	6.52466	6.53041	6.58823	6.18779	6.11238	5.82615	5.45584	5.91753	6.58483	6.60209	5.89554	1.11277	1.11568	0.996284	0.154151	0.157928	-0.00537176	0.0418106	0.0532944	0.0170219	0.056306
sp|Q15910-2|EZH2_HUMAN	EZH2	EZH2_HUMAN Isoform 2 of Histone-lysine N-methyltransferase EZH2	11	5.66292	6.55958	5.67311	5.80115	6.75364	7.07882	6.36807	6.81888	7.12743	6.49159	6.75206	6.06487	5.92563	5.87553	5.71646	5.33026	5.92419	6.75485	6.60899	5.71197	1.14022	1.11559	0.964177	0.189306	0.157811	-0.0526295	0.0722863	0.0434696	0.0676166	0.047207
sp|Q8IWA0|WDR75_HUMAN	WDR75	WDR75_HUMAN WD repeat-containing protein 75	10	5.75532	6.19663	5.77503	5.91472	6.61873	6.57817	6.04328	6.54154	6.73538	6.37469	6.5819	6.68062	6.07912	5.95145	5.81409	6.35932	5.91043	6.44543	6.59315	6.051	1.09052	1.11551	1.02378	0.125015	0.157705	0.0339105	0.0344424	0.041882	0.0240982	0.0383902
sp|Q9H1C3|GL8D2_HUMAN	GLT8D2	GL8D2_HUMAN Glycosyltransferase 8 domain-containing protein 2	1	6.32516	6.66042	5.90947	5.75077	6.5476	6.04837	5.79178	6.57491	7.01526	6.16925	7.11848	7.18922	5.80932	5.74886	5.85602	5.48512	6.16146	6.24066	6.87305	5.72483	1.01286	1.11549	0.929136	0.0184287	0.15768	-0.106038	0.0667814	0.0616733	0.0690534	0.0289473
sp|Q9NW97|TMM51_HUMAN	TMEM51	TMM51_HUMAN Transmembrane protein 51	1	7.13727	5.17699	5.5056	5.77291	6.54387	4.76111	7.55257	6.12268	5.98247	6.23711	6.55329	7.53937	5.87813	5.44973	6.54776	7.23915	5.89819	6.24506	6.57806	6.27869	1.05881	1.11527	1.06451	0.0824419	0.157389	0.0901912	0.14602	0.185267	0.10369	0.124817
sp|Q9NZJ7|MTCH1_HUMAN	MTCH1	MTCH1_HUMAN Mitochondrial carrier homolog 1	6	6.06833	6.79859	5.41398	5.73456	6.41244	7.22548	6.21752	6.11853	7.02179	6.65848	6.5842	6.51861	6.14821	5.74339	5.79671	5.53917	6.00386	6.49349	6.69577	5.80687	1.08155	1.11524	0.967189	0.113103	0.157358	-0.0481308	0.0988299	0.0774676	0.0335632	0.0436011
tr|I3L2E1|I3L2E1_HUMAN	CLUAP1	I3L2E1_HUMAN Clusterin-associated protein 1	4	5.93191	6.63819	5.66999	5.75895	6.69706	6.54528	6.03352	6.43397	7.24801	6.65941	6.48025	6.37609	6.24461	5.89253	5.91731	5.47291	5.99976	6.42746	6.69094	5.88184	1.07129	1.1152	0.980346	0.0993434	0.157304	-0.0286373	0.0732184	0.0441698	0.0581946	0.0537812
sp|Q9NUU7|DD19A_HUMAN	DDX19A	DD19A_HUMAN ATP-dependent RNA helicase DDX19A	5	5.97306	6.1617	5.50577	5.69813	6.59	7.06663	6.1267	6.57792	6.90236	6.42002	6.60127	6.10002	6.34821	5.97078	6.4492	5.50824	5.83466	6.59031	6.50592	6.06911	1.12951	1.11505	1.04018	0.175697	0.157103	0.0568345	0.0497639	0.058241	0.0516226	0.070332
sp|Q96SK2|TM209_HUMAN	TMEM209	TM209_HUMAN Transmembrane protein 209	3	5.402	5.11914	6.35333	6.35334	6.62644	6.31923	6.31015	6.14067	6.39764	5.95622	6.85826	6.6869	5.98472	6.72787	6.45624	6.30785	5.80695	6.34912	6.47476	6.36917	1.09337	1.115	1.09682	0.128776	0.157044	0.133324	0.110452	0.0318619	0.06093	0.0486305
sp|Q9BX63|FANCJ_HUMAN	BRIP1	FANCJ_HUMAN Fanconi anemia group J protein	9	5.7629	6.3774	5.80025	5.64833	6.67677	6.48511	6.21574	6.26449	7.07342	6.35034	6.25465	6.62243	6.28352	5.99513	6.31749	5.87201	5.89722	6.41053	6.57521	6.11704	1.08704	1.11497	1.03727	0.120408	0.157002	0.0527981	0.0553787	0.0331789	0.0557951	0.0356663
sp|Q9HCD6-2|TANC2_HUMAN	TANC2	TANC2_HUMAN Isoform 2 of Protein TANC2	9	5.83427	6.57091	5.75001	5.98874	6.68663	7.23551	6.11248	6.11836	6.88722	7.01979	6.32929	6.68278	5.84109	6.04361	5.62478	5.27453	6.03598	6.53824	6.72977	5.696	1.08321	1.11494	0.943674	0.115315	0.156969	-0.0836388	0.0613101	0.0821639	0.0447012	0.0577482
sp|P55085|PAR2_HUMAN	F2RL1	PAR2_HUMAN Proteinase-activated receptor 2	2	5.79361	6.59352	5.85705	5.92322	6.74176	7.27209	6.78235	6.2989	6.63858	6.70469	6.79591	6.80453	5.41441	5.49617	5.65799	5.22521	6.04185	6.77378	6.73593	5.44845	1.12114	1.11488	0.901784	0.16497	0.156886	-0.149146	0.0614989	0.0587381	0.0117386	0.0330334
sp|P23634|AT2B4_HUMAN	ATP2B4	AT2B4_HUMAN Plasma membrane calcium-transporting ATPase 4	14	6.2819	6.28938	5.99435	5.7746	6.06542	6.4022	6.33815	5.82275	7.03796	6.35527	7.05041	6.69187	5.73062	6.30185	6.08163	5.78164	6.08506	6.15713	6.78388	5.97393	1.01184	1.11484	0.981738	0.0169871	0.156839	-0.0265894	0.0408212	0.0432813	0.0487241	0.0448443
sp|Q9BZ23|PANK2_HUMAN	PANK2	PANK2_HUMAN Pantothenate kinase 2, mitochondrial	4	5.47739	6.2666	6.04916	5.85867	6.92708	6.64118	6.25546	5.68714	7.2011	6.41299	6.72937	6.0194	6.52192	5.74183	6.68352	5.52719	5.91296	6.37772	6.59072	6.11862	1.0786	1.11462	1.03478	0.10916	0.156556	0.0493258	0.056622	0.0840996	0.0758533	0.0931021
sp|Q15386|UBE3C_HUMAN	UBE3C	UBE3C_HUMAN Ubiquitin-protein ligase E3C	23	5.67345	6.60959	5.42239	5.83323	6.70344	7.33302	6.24207	6.37549	6.9202	6.60183	6.21872	6.4943	6.09183	5.86974	5.96106	5.64966	5.88467	6.6635	6.55876	5.89307	1.13235	1.11455	1.00143	0.179321	0.156463	0.00205973	0.087008	0.0730281	0.0442136	0.0315827
sp|Q5T447|HECD3_HUMAN	HECTD3	HECD3_HUMAN E3 ubiquitin-protein ligase HECTD3	5	5.87801	6.39256	5.88759	5.96363	6.44382	6.41365	6.38154	5.88431	6.59799	6.4439	6.80002	7.04111	6.23772	6.10663	6.06955	5.45798	6.03045	6.28083	6.72075	5.96797	1.04152	1.11447	0.98964	0.0586902	0.156358	-0.0150248	0.0405324	0.0422822	0.0384786	0.058238
sp|Q9P2W9|STX18_HUMAN	STX18	STX18_HUMAN Syntaxin-18	11	5.94688	6.62445	5.53504	5.8431	6.95657	7.06802	6.47188	6.6279	6.81514	6.75996	6.62403	6.49	5.76076	5.6284	5.79957	5.0483	5.98737	6.78109	6.67228	5.55926	1.13257	1.11439	0.928498	0.179596	0.156259	-0.10703	0.076715	0.0410271	0.0218307	0.0626757
sp|Q9NRW3|ABC3C_HUMAN	APOBEC3C	ABC3C_HUMAN DNA dC->dU-editing enzyme APOBEC-3C	1	5.60628	5.72099	5.96133	6.13792	6.04978	6.52579	5.93791	5.69529	5.47608	6.33388	6.68711	7.60914	6.92683	7.03888	6.42887	5.86391	5.85663	6.05219	6.52655	6.56462	1.03339	1.11439	1.12089	0.0473871	0.15625	0.164641	0.0407842	0.0576127	0.135274	0.0818226
sp|Q9NPA3|M1IP1_HUMAN	MID1IP1	M1IP1_HUMAN Mid1-interacting protein 1	8	5.62443	6.13915	5.68197	6.20702	6.59936	7.10753	6.35428	6.25146	6.93415	6.63594	6.56382	6.22341	6.17997	5.85608	6.07811	5.56332	5.91314	6.57816	6.58933	5.91937	1.11246	1.11435	1.00105	0.153759	0.156207	0.00151859	0.0511312	0.0580554	0.0442993	0.0461508
sp|Q7Z403|TMC6_HUMAN	TMC6	TMC6_HUMAN Transmembrane channel-like protein 6	2	5.94887	6.19072	6.0429	6.13179	6.12751	6.62649	5.82735	5.82828	7.05492	6.61064	6.4958	6.93333	6.61104	5.97756	5.97211	5.6207	6.07857	6.10241	6.77367	6.04535	1.00392	1.11435	0.994535	0.00564656	0.156206	-0.0079055	0.0173856	0.0617577	0.0389087	0.0682224
sp|Q96FW1|OTUB1_HUMAN	OTUB1	OTUB1_HUMAN Ubiquitin thioesterase OTUB1	19	5.72781	6.24693	5.62955	6.05124	6.62887	6.91892	6.57784	6.59746	6.7382	6.57706	6.43217	6.6124	6.06654	5.80337	5.79343	5.5982	5.91388	6.68077	6.58996	5.81539	1.12968	1.11432	0.983345	0.175909	0.156164	-0.0242309	0.0483477	0.0239718	0.0191029	0.033058
sp|O00478|BT3A3_HUMAN	BTN3A3	BT3A3_HUMAN Butyrophilin subfamily 3 member A3	3	5.83575	7.17052	5.80722	5.60495	6.00062	5.85465	5.9892	5.63049	7.23612	6.16726	7.01694	6.78889	5.87524	6.36664	6.57251	6.08299	6.10461	5.86874	6.8023	6.22434	0.961362	1.11429	1.01961	-0.0568483	0.156124	0.0280229	0.117615	0.0293264	0.0677798	0.0493726
sp|Q14534|ERG1_HUMAN	SQLE	ERG1_HUMAN Squalene monooxygenase	13	5.7816	5.85994	5.82701	6.09025	6.83982	6.50176	6.30962	6.57484	6.93997	6.42252	6.44131	6.4458	6.35325	5.99778	5.98275	5.63177	5.8897	6.55651	6.5624	5.99139	1.11322	1.11422	1.01727	0.154734	0.156029	0.024696	0.0233464	0.0334796	0.0383877	0.0491722
sp|O75369|FLNB_HUMAN	FLNB	FLNB_HUMAN Filamin-B	1	5.61253	5.58576	6.34596	6.23259	5.90194	6.60114	6.25325	6.76995	6.30696	7.3612	7.10738	5.71687	5.48656	5.46561	6.8963	6.35601	5.94421	6.38157	6.6231	6.05112	1.07358	1.11421	1.01799	0.102426	0.156022	0.0257171	0.0675068	0.0603901	0.113676	0.115635
sp|Q86W50|MET16_HUMAN	METTL16	MET16_HUMAN Methyltransferase-like protein 16	13	5.95662	6.69561	5.41322	5.74415	6.77928	7.3016	6.31904	6.54142	6.79317	6.59303	6.67042	6.47061	5.86355	5.75636	5.82392	5.27801	5.9524	6.73534	6.63181	5.68046	1.13153	1.11414	0.954314	0.178278	0.155931	-0.0674637	0.0913224	0.06261	0.02042	0.0478702
sp|Q96FL9-3|GLT14_HUMAN	GALNT14	GLT14_HUMAN Isoform 3 of Polypeptide N-acetylgalactosaminyltransferase 14	2	5.51189	6.08503	6.17397	6.18192	6.15227	6.12148	5.98535	6.43431	6.59037	6.47445	6.5941	7.02655	6.07862	6.47919	5.83581	6.27468	5.9882	6.17335	6.67137	6.16707	1.03092	1.11409	1.02987	0.0439312	0.15586	0.0424634	0.0535327	0.0305319	0.0364567	0.0445602
sp|O75718|CRTAP_HUMAN	CRTAP	CRTAP_HUMAN Cartilage-associated protein	12	5.72895	6.71087	5.49513	5.69672	6.48884	7.00437	5.94834	6.33655	6.85533	6.46645	6.55862	6.44555	6.40488	6.17246	6.06864	5.61828	5.90792	6.44452	6.58149	6.06607	1.09083	1.11401	1.02677	0.125424	0.155764	0.0381113	0.0922845	0.0678297	0.0287253	0.0543955
sp|Q5T9A4|ATD3B_HUMAN	ATAD3B	ATD3B_HUMAN ATPase family AAA domain-containing protein 3B	18	5.62324	6.72389	5.50625	5.86324	6.67014	7.33109	5.79023	6.59037	6.72458	7.00321	6.09769	6.5893	6.28679	6.07506	5.66727	5.45764	5.92916	6.59546	6.6037	5.87169	1.11238	1.11377	0.990308	0.153646	0.155447	-0.0140507	0.092807	0.0956986	0.0573622	0.0642444
sp|Q9BQD7|F173A_HUMAN	FAM173A	F173A_HUMAN Protein FAM173A	1	5.34014	4.76061	7.57334	6.23864	5.61458	7.741	5.92048	5.53	7.36024	6.08016	7.76495	5.42748	6.76077	5.68043	6.56929	5.63788	5.97818	6.20152	6.65821	6.16209	1.03736	1.11375	1.03076	0.0529138	0.155427	0.0437134	0.204913	0.167691	0.16376	0.0951361
sp|Q9BX70|BTBD2_HUMAN	BTBD2	BTBD2_HUMAN BTB/POZ domain-containing protein 2	3	6.16939	5.72462	6.06661	6.11648	6.4472	6.45659	5.73239	6.66223	6.91174	6.6258	6.089	7.18913	5.94614	6.12543	5.78261	5.95467	6.01927	6.3246	6.70392	5.95221	1.05072	1.11374	0.988859	0.0713851	0.155415	-0.0161637	0.033371	0.0643656	0.070116	0.0235231
sp|P54753|EPHB3_HUMAN	EPHB3	EPHB3_HUMAN Ephrin type-B receptor 3	8	5.73877	5.88533	5.60042	5.60294	6.87427	6.64358	6.02325	6.25138	6.70253	6.23041	6.24068	6.24982	6.7376	6.20006	6.75279	6.26616	5.70686	6.44812	6.35586	6.48915	1.12989	1.11372	1.13708	0.17618	0.155389	0.185332	0.0237256	0.0593271	0.0363836	0.0457604
sp|Q7Z4G4|TRM11_HUMAN	TRMT11	TRM11_HUMAN tRNA (guanine(10)-N2)-methyltransferase homolog	3	5.47048	6.13667	5.65977	6.58127	6.58075	6.3977	5.91115	6.43701	6.69158	6.99615	6.14439	6.72809	5.7335	6.14944	5.85441	6.52764	5.96205	6.33165	6.64005	6.06625	1.06199	1.11372	1.01748	0.0867742	0.155387	0.0249965	0.0836925	0.0459859	0.053803	0.0583131
sp|Q9BXB4|OSB11_HUMAN	OSBPL11	OSB11_HUMAN Oxysterol-binding protein-related protein 11	11	5.73992	6.33349	5.69247	6.37503	6.90703	6.24103	6.02855	6.18341	6.79801	6.563	6.71712	6.80716	6.12294	5.91585	5.84176	5.73322	6.03523	6.34	6.72132	5.90344	1.0505	1.11368	0.978164	0.0710758	0.155337	-0.0318517	0.0611883	0.0612805	0.0168178	0.0278536
sp|Q9H5Q4|TFB2M_HUMAN	TFB2M	TFB2M_HUMAN Dimethyladenosine transferase 2, mitochondrial	13	5.61925	6.3751	5.5493	6.04507	6.5665	6.94457	6.28566	6.59373	6.58166	6.63498	6.45664	6.59621	6.27115	5.82523	5.95968	5.69525	5.89718	6.59762	6.56737	5.93783	1.11877	1.11365	1.00689	0.161919	0.155291	0.00990995	0.0655689	0.0409217	0.0117514	0.0416064
sp|O43808|PM34_HUMAN	SLC25A17	PM34_HUMAN Peroxisomal membrane protein PMP34	1	4.90112	5.92186	5.87298	5.58443	6.69986	7.59227	5.92242	6.8652	6.43316	6.49662	6.3706	5.51163	7.83975	6.29802	6.05815	5.63193	5.5701	6.76994	6.203	6.45696	1.21541	1.11363	1.15922	0.28144	0.155264	0.213153	0.0844117	0.101212	0.0747666	0.149007
sp|Q6P996|PDXD1_HUMAN	PDXDC1	PDXD1_HUMAN Pyridoxal-dependent decarboxylase domain-containing protein 1	21	5.6552	6.61128	5.67871	5.84788	6.60417	7.10388	6.43882	6.52284	6.5394	6.69292	6.53707	6.72585	6.00174	5.73013	5.73166	5.57846	5.94827	6.66743	6.62381	5.7605	1.1209	1.11357	0.968433	0.164661	0.155192	-0.0462761	0.0756967	0.0447994	0.015056	0.0305794
sp|P11166|GTR1_HUMAN	SLC2A1	GTR1_HUMAN Solute carrier family 2, facilitated glucose transporter member 1	12	5.86577	6.60705	5.46458	5.81965	7.05064	7.1614	6.24452	6.56418	6.64276	6.91247	6.69891	6.20029	5.97823	5.83654	5.75064	5.20237	5.93926	6.75518	6.61361	5.69195	1.13738	1.11354	0.958359	0.185711	0.155154	-0.0613621	0.0808048	0.0633595	0.045216	0.0596642
sp|Q5SGD2|PPM1L_HUMAN	PPM1L	PPM1L_HUMAN Protein phosphatase 1L	6	5.59525	6.10651	5.77695	5.95385	6.59069	7.05568	6.7805	6.6095	6.2532	6.85675	6.67211	6.31102	5.81979	5.7871	6.25494	5.57615	5.85814	6.75909	6.52327	5.8595	1.15379	1.11354	1.00023	0.206387	0.155153	0.00033366	0.0377289	0.0318646	0.0443725	0.0486194
sp|Q05DH4|F16A1_HUMAN	FAM160A1	F16A1_HUMAN Protein FAM160A1	5	5.79337	6.76965	5.57525	5.92873	6.70053	6.75135	6.27906	6.12682	6.37812	6.89946	7.05566	6.46594	5.76369	5.65214	6.16843	5.69179	6.01675	6.46444	6.69979	5.81901	1.07441	1.11352	0.967135	0.103541	0.155133	-0.0482101	0.0868625	0.0477971	0.0491019	0.0408104
sp|Q9NQU5|PAK6_HUMAN	PAK6	PAK6_HUMAN Serine/threonine-protein kinase PAK 6	4	5.98583	5.62348	6.24521	5.87911	6.8628	7.08103	7.13532	6.06842	6.71666	6.31319	6.25712	7.14051	5.79775	6.06783	5.19315	5.63259	5.93341	6.78689	6.60687	5.67283	1.14384	1.1135	0.956083	0.19389	0.155106	-0.0647922	0.0434042	0.0726767	0.0621242	0.0646363
sp|Q86UX6|ST32C_HUMAN	STK32C	ST32C_HUMAN Serine/threonine-protein kinase 32C	4	5.83495	5.82757	5.96297	6.39852	6.13589	6.35685	6.14042	5.82916	6.62767	6.0281	6.78089	7.31229	6.47503	5.87463	6.49044	5.9246	6.006	6.11558	6.68724	6.19117	1.01824	1.11343	1.03083	0.0260843	0.155005	0.0438082	0.0447819	0.0354844	0.0790092	0.0544873
sp|P15056|BRAF_HUMAN	BRAF	BRAF_HUMAN Serine/threonine-protein kinase B-raf	8	5.88369	6.04512	5.91367	5.83255	6.76187	6.81313	6.51038	6.28461	6.93776	6.45761	6.56231	6.40022	5.99789	5.81501	6.18284	5.60133	5.91876	6.5925	6.58948	5.89927	1.11383	1.11332	0.996707	0.155531	0.154869	-0.00475852	0.0153165	0.0370424	0.0366786	0.042209
sp|Q5T0D9|TPRGL_HUMAN	TPRG1L	TPRGL_HUMAN Tumor protein p63-regulated gene 1-like protein	4	5.20325	6.00943	5.80471	7.35658	6.68194	6.8217	6.12772	6.64038	7.02886	6.59833	6.56793	6.94085	5.62161	5.44082	6.26334	4.89257	6.09349	6.56794	6.78399	5.55459	1.07786	1.11332	0.91156	0.108171	0.154865	-0.13359	0.149162	0.0462173	0.0346449	0.101737
sp|Q5T6F0|DCA12_HUMAN	DCAF12	DCA12_HUMAN DDB1- and CUL4-associated factor 12	1	4.99218	6.82251	7.04367	6.03923	6.44471	6.21133	5.80939	6.20925	6.20521	7.39973	7.10764	7.00609	5.53977	4.67207	6.07005	6.42719	6.2244	6.16867	6.92967	5.67727	0.991047	1.11331	0.9121	-0.0129747	0.154852	-0.132737	0.149034	0.042762	0.0737385	0.134376
sp|Q8TER5|ARH40_HUMAN	ARHGEF40	ARH40_HUMAN Rho guanine nucleotide exchange factor 40	1	6.5925	6.33171	5.45748	5.77764	6.34685	7.07134	6.34668	6.053	6.71643	6.88637	6.17229	7.11896	6.26487	6.59235	4.92154	5.34998	6.03983	6.45447	6.72351	5.78219	1.06865	1.1132	0.957342	0.0957895	0.154707	-0.0628938	0.0854192	0.0672307	0.0599125	0.134589
sp|Q9H0A8|COMD4_HUMAN	COMMD4	COMD4_HUMAN COMM domain-containing protein 4	10	5.24999	6.39336	5.92859	6.17833	6.67833	6.86074	6.24625	6.51537	6.24805	6.41624	6.82772	6.94398	6.07106	5.88642	5.95382	5.60174	5.93757	6.57517	6.609	5.87826	1.10738	1.11308	0.990011	0.147157	0.154559	-0.0144828	0.0835647	0.0396553	0.0499924	0.0339401
sp|P27986-4|P85A_HUMAN	PIK3R1	P85A_HUMAN Isoform 4 of Phosphatidylinositol 3-kinase regulatory subunit alpha	11	5.80082	6.50181	5.64424	6.02788	6.67248	6.85484	6.30807	6.23844	6.81391	6.54529	6.7422	6.58054	6.09531	5.72218	5.88152	5.57045	5.99369	6.51846	6.67048	5.81737	1.08755	1.11292	0.970582	0.121087	0.154348	-0.043078	0.0623276	0.0451236	0.0192525	0.0386163
sp|Q9H0C8|ILKAP_HUMAN	ILKAP	ILKAP_HUMAN Integrin-linked kinase-associated serine/threonine phosphatase 2C	15	5.86603	6.47579	5.41167	5.9994	6.50547	6.70039	6.16683	6.52969	6.73266	6.59594	6.5616	6.54266	6.18726	5.77186	6.40412	5.54866	5.93822	6.4756	6.60821	5.97798	1.09049	1.11283	1.00669	0.124982	0.154229	0.00962571	0.0737376	0.0344947	0.0129905	0.0649453
sp|Q8NCJ5|SPRY3_HUMAN	SPRYD3	SPRY3_HUMAN SPRY domain-containing protein 3	1	5.62542	7.66861	5.37371	5.37083	6.4003	8.04239	6.78334	5.92779	6.76275	7.42371	6.11773	6.44111	6.08896	5.49966	5.03083	5.44287	6.00964	6.78845	6.68633	5.51558	1.12959	1.1126	0.917788	0.175804	0.153934	-0.123767	0.185102	0.133497	0.0834055	0.0789794
sp|P0CG29|GST2_HUMAN	GSTT2	GST2_HUMAN Glutathione S-transferase theta-2	10	5.58408	6.2186	5.66149	6.04824	6.70033	6.71022	5.98635	6.41372	6.85325	6.47434	6.46362	6.36752	6.21222	6.12365	6.15761	6.02475	5.8781	6.45266	6.53968	6.12956	1.09774	1.11255	1.04278	0.134542	0.15387	0.0604324	0.0518113	0.0526793	0.0327984	0.0128596
sp|Q96MW5|COG8_HUMAN	COG8	COG8_HUMAN Conserved oligomeric Golgi complex subunit 8	6	5.84517	6.41495	5.53505	6.38348	6.62201	6.94713	5.88353	6.33392	6.84488	6.77815	6.39741	6.87849	6.09219	5.69033	5.70578	5.6475	6.04466	6.44665	6.72473	5.78395	1.0665	1.11251	0.956869	0.0928873	0.153815	-0.0636067	0.070926	0.070007	0.0330368	0.0357829
sp|P22102|PUR2_HUMAN	GART	PUR2_HUMAN Trifunctional purine biosynthetic protein adenosine-3	104	5.80397	6.33369	5.68242	5.96898	6.85302	6.8202	6.40847	6.28706	6.69842	6.80525	6.58782	6.37393	6.19025	5.84942	5.86917	5.46794	5.94726	6.59219	6.61636	5.8442	1.10844	1.1125	0.982669	0.148531	0.15381	-0.025222	0.0476052	0.0435162	0.027869	0.0505642
sp|O00186|STXB3_HUMAN	STXBP3	STXB3_HUMAN Syntaxin-binding protein 3	15	5.67037	6.09062	5.74296	6.15855	6.63934	6.58395	6.30991	6.51831	6.837	6.46015	6.59186	6.43437	6.43906	5.77756	6.03094	5.71505	5.91563	6.51288	6.58085	5.99065	1.10096	1.11245	1.01268	0.138764	0.153742	0.0181825	0.041361	0.0221209	0.0279862	0.0548626
sp|Q9Y6J9|TAF6L_HUMAN	TAF6L	TAF6L_HUMAN TAF6-like RNA polymerase II p300/CBP-associated factor-associated factor 65 kDa subunit 6L	1	5.51252	6.91423	6.84724	7.27216	4.86055	6.14981	5.04198	7.3899	7.35232	8.40636	5.40135	8.37053	5.58492	5.98098	4.9284	3.98675	6.63654	5.86056	7.38264	5.12026	0.883075	1.11242	0.771526	-0.179392	0.153706	-0.374213	0.116358	0.199298	0.190765	0.170201
sp|Q12767-2|K0195_HUMAN	KIAA0195	K0195_HUMAN Isoform 2 of Uncharacterized protein KIAA0195	2	5.49481	5.67284	5.97554	6.54386	6.06831	6.23575	6.50763	6.14861	6.98187	6.26161	6.19337	6.91278	6.03091	6.36264	6.1384	6.47106	5.92176	6.24007	6.58741	6.25075	1.05375	1.11241	1.05556	0.0755367	0.153684	0.0780032	0.0776397	0.0306129	0.063376	0.0322627
sp|O15121|DEGS1_HUMAN	DEGS1	DEGS1_HUMAN Sphingolipid delta(4)-desaturase DES1	3	5.35278	6.00691	5.76515	6.18742	6.7965	6.72271	6.34678	6.41045	6.152	6.3495	6.76991	6.65961	6.3033	5.57638	6.45175	6.14886	5.82806	6.56911	6.48276	6.12007	1.12715	1.11233	1.0501	0.172681	0.15359	0.0705318	0.0619427	0.0340281	0.043711	0.0625771
sp|O76062|ERG24_HUMAN	TM7SF2	ERG24_HUMAN Delta(14)-sterol reductase	1	6.55646	7.01725	5.87779	6.0316	5.87214	6.47349	5.63515	5.28639	6.24064	7.87653	6.27738	7.94917	5.45597	6.79349	4.97858	5.67797	6.37078	5.81679	7.08593	5.7265	0.913043	1.11226	0.898871	-0.131245	0.153488	-0.153815	0.0815866	0.0858798	0.134834	0.134262
sp|O15528|CP27B_HUMAN	CYP27B1	CP27B_HUMAN 25-hydroxyvitamin D-1 alpha hydroxylase, mitochondrial	1	6.21458	6.462	4.9035	6.76813	6.17321	7.65378	4.8126	5.93576	6.51955	6.67946	7.64862	6.23196	7.14115	6.0357	6.13948	4.68054	6.08705	6.14384	6.7699	5.99922	1.00933	1.11218	0.98557	0.0133962	0.15339	-0.0209695	0.134856	0.190193	0.0907515	0.168455
sp|O60583|CCNT2_HUMAN	CCNT2	CCNT2_HUMAN Cyclin-T2	5	5.57974	6.26854	5.65804	5.88144	6.71152	6.91406	5.95957	6.65002	6.93049	6.2721	6.37501	6.43031	6.43843	6.12823	5.98389	5.81862	5.84694	6.55879	6.50198	6.09229	1.12175	1.11203	1.04196	0.165748	0.153197	0.0593034	0.0528087	0.0632895	0.0450787	0.0431946
sp|Q9NP71|MLXPL_HUMAN	MLXIPL	MLXPL_HUMAN Carbohydrate-responsive element-binding protein	2	5.69556	5.26231	6.11963	6.20832	6.97567	6.30181	6.31147	6.46781	7.31914	5.79264	5.90896	6.8719	6.52372	6.35712	5.57368	6.31026	5.82146	6.51419	6.47316	6.19119	1.119	1.11195	1.06351	0.162206	0.15309	0.0888381	0.0746835	0.0486508	0.11478	0.06812
sp|Q03519|TAP2_HUMAN	TAP2	TAP2_HUMAN Antigen peptide transporter 2	8	5.8732	6.35844	5.64777	6.00061	6.13761	7.10437	5.97811	6.29837	6.96437	6.60661	6.48338	6.49785	6.24444	5.73282	6.14189	5.93015	5.97001	6.37961	6.63805	6.01233	1.06861	1.1119	1.00709	0.0957372	0.153028	0.0101909	0.0497861	0.0784604	0.0338035	0.037872
sp|P19623|SPEE_HUMAN	SRM	SPEE_HUMAN Spermidine synthase	29	5.66149	6.11817	5.90575	6.05796	6.56999	6.7301	6.56824	6.45786	6.71494	6.44245	6.60403	6.63774	6.10847	5.70322	6.11679	5.60279	5.93584	6.58155	6.59979	5.88282	1.10878	1.11185	0.991067	0.148974	0.152967	-0.0129455	0.0342962	0.0170275	0.0173805	0.0456473
sp|O75694|NU155_HUMAN	NUP155	NU155_HUMAN Nuclear pore complex protein Nup155	47	5.84894	6.67041	5.47063	5.9534	6.78407	7.2043	6.22146	6.4883	6.87465	6.63432	6.5556	6.55687	6.02917	5.59542	5.81106	5.30138	5.98584	6.67453	6.65536	5.68426	1.11505	1.11185	0.949617	0.157112	0.152962	-0.074583	0.0837457	0.0631281	0.022652	0.0546529
sp|Q9UDX5|MTFP1_HUMAN	MTFP1	MTFP1_HUMAN Mitochondrial fission process protein 1	2	5.50539	6.53171	5.62436	5.89775	6.95197	7.22175	5.80568	6.63162	6.56981	6.76165	6.45871	6.40167	5.9506	5.96517	5.83268	5.88947	5.8898	6.65275	6.54796	5.90948	1.12954	1.11175	1.00334	0.175733	0.152826	0.00481193	0.0778263	0.092304	0.0242286	0.010289
sp|P78368|KC1G2_HUMAN	CSNK1G2	KC1G2_HUMAN Casein kinase I isoform gamma-2	1	5.87677	5.18817	6.1377	6.51411	6.4016	6.96729	6.46176	5.74467	6.27813	7.24566	6.28893	6.55408	5.71526	6.20566	6.81823	5.602	5.92919	6.39383	6.5917	6.08529	1.07837	1.11174	1.02633	0.108846	0.152816	0.037491	0.0942805	0.0784575	0.068915	0.0911101
sp|P49327|FAS_HUMAN	FASN	FAS_HUMAN Fatty acid synthase	443	5.89306	6.43312	5.54152	5.87541	6.84587	6.89727	6.3297	6.40408	6.87468	6.6108	6.47099	6.43775	6.18701	5.77692	5.95534	5.46647	5.93578	6.61923	6.59856	5.84643	1.11514	1.11166	0.984948	0.157226	0.152713	-0.0218798	0.0621482	0.0443716	0.0301229	0.0519796
sp|Q9BRK5|CAB45_HUMAN	SDF4	CAB45_HUMAN 45 kDa calcium-binding protein	19	5.70138	6.64797	5.37331	6.08511	6.4363	7.13659	5.9981	6.50762	6.74302	6.61515	6.65713	6.44788	6.04685	6.00616	5.85492	5.74251	5.95194	6.51965	6.6158	5.91261	1.09538	1.11154	0.993392	0.131434	0.152554	-0.00956547	0.0920132	0.0719275	0.0187354	0.0237253
sp|Q14204|DYHC1_HUMAN	DYNC1H1	DYHC1_HUMAN Cytoplasmic dynein 1 heavy chain 1	228	5.8342	6.53205	5.48295	5.83259	6.85419	7.16429	6.20459	6.42148	6.9467	6.61168	6.2777	6.48371	6.28248	5.81803	5.7951	5.45827	5.92045	6.66114	6.57995	5.83847	1.12511	1.11139	0.986153	0.170062	0.15237	-0.0201159	0.0743071	0.0646467	0.0426375	0.0579985
sp|Q8NCW0|KREM2_HUMAN	KREMEN2	KREM2_HUMAN Kremen protein 2	1	5.33776	7.29702	5.11784	5.5882	7.00405	7.31559	6.41999	5.88691	6.86219	6.77072	6.32769	5.97951	7.24671	6.06283	6.11381	4.66919	5.83521	6.65663	6.48503	6.02313	1.14077	1.11136	1.03221	0.19001	0.152329	0.0457313	0.170227	0.0951457	0.0632147	0.175185
sp|P01112|RASH_HUMAN	HRAS	RASH_HUMAN GTPase HRas	3	6.06407	6.6426	5.23411	5.61578	6.31739	6.49954	5.56404	5.71192	6.91265	6.50043	6.23621	6.52902	6.40312	7.03683	6.6092	6.12309	5.88914	6.02322	6.54458	6.54306	1.02277	1.1113	1.11104	0.0324786	0.152243	0.151909	0.102919	0.0755468	0.0425609	0.0588057
sp|Q13155|AIMP2_HUMAN	AIMP2	AIMP2_HUMAN Aminoacyl tRNA synthase complex-interacting multifunctional protein 2	15	5.91431	6.45515	5.42653	5.88582	6.76181	7.02436	6.05679	6.35306	6.88817	6.85528	6.46524	6.10871	6.35895	5.81549	6.12658	5.50375	5.92045	6.549	6.57935	5.95119	1.10617	1.11129	1.00519	0.145568	0.152238	0.00747134	0.0710676	0.065494	0.0559159	0.0625457
sp|P14868|SYDC_HUMAN	DARS	SYDC_HUMAN Aspartate--tRNA ligase, cytoplasmic	67	5.85956	6.47283	5.48652	5.85252	6.72463	7.04728	6.1686	6.35294	6.94982	6.55479	6.33679	6.46305	6.26654	5.82055	5.9914	5.65219	5.91786	6.57336	6.57611	5.93267	1.11077	1.11123	1.0025	0.151557	0.15216	0.00360658	0.069104	0.0595638	0.0402491	0.0441865
sp|Q96EG1|ARSG_HUMAN	ARSG	ARSG_HUMAN Arylsulfatase G	3	6.16718	5.25905	6.901	5.37255	6.52488	6.27262	6.39154	6.56077	6.98638	5.97016	7.23355	6.14476	6.38694	5.54077	5.75584	6.53202	5.92495	6.43745	6.58371	6.05389	1.0865	1.11119	1.02176	0.119688	0.1521	0.0310613	0.129271	0.0204768	0.0941863	0.079314
sp|P17980|PRS6A_HUMAN	PSMC3	PRS6A_HUMAN 26S protease regulatory subunit 6A	54	5.84696	6.52326	5.46752	5.7897	6.94086	6.93554	6.15662	6.29677	6.97201	6.66349	6.38078	6.23809	6.39227	5.93842	5.95069	5.50703	5.90686	6.58245	6.56359	5.9471	1.11437	1.11118	1.00681	0.156233	0.152094	0.00979552	0.0750953	0.0630098	0.0494594	0.0607766
sp|Q99490|AGAP2_HUMAN	AGAP2	AGAP2_HUMAN Arf-GAP with GTPase, ANK repeat and PH domain-containing protein 2	1	6.98521	6.16889	6.70069	4.4947	5.86461	6.41767	5.55588	5.84657	7.37927	6.08318	7.21219	6.37904	7.04661	5.41891	6.74123	5.70536	6.08737	5.92118	6.76342	6.22803	0.972699	1.11106	1.02311	-0.0399343	0.151933	0.0329557	0.183064	0.0607919	0.0931654	0.126473
sp|Q9H497|TOR3A_HUMAN	TOR3A	TOR3A_HUMAN Torsin-3A	3	5.61811	6.36836	6.0756	5.95474	6.20389	7.00452	6.33493	6.22853	6.90104	6.60898	6.68567	6.48788	6.26168	5.93725	5.88783	5.44099	6.0042	6.44297	6.67089	5.88194	1.07308	1.11104	0.979637	0.101753	0.151907	-0.0296812	0.051713	0.0587714	0.0260382	0.0573803
sp|Q6AZZ1|TRI68_HUMAN	TRIM68	TRI68_HUMAN E3 ubiquitin-protein ligase TRIM68	1	6.744	5.14895	7.0787	5.54855	6.52411	7.02416	6.1371	5.42228	6.5154	5.80675	7.10912	7.80968	7.01466	5.27386	6.10745	4.73524	6.13005	6.27691	6.81024	5.7828	1.02396	1.11096	0.943353	0.0341563	0.151806	-0.08413	0.15121	0.107637	0.125233	0.172328
sp|Q96G75|RMD5B_HUMAN	RMND5B	RMD5B_HUMAN Protein RMD5 homolog B	1	6.06092	5.84371	6.13045	6.40661	6.74617	7.23817	5.40531	6.01198	5.97307	7.05323	6.36001	7.76652	6.03246	4.99725	5.47838	6.49577	6.11042	6.35041	6.78821	5.75097	1.03927	1.11092	0.941173	0.055577	0.151759	-0.0874681	0.0379964	0.127038	0.116466	0.113419
sp|P78527|PRKDC_HUMAN	PRKDC	PRKDC_HUMAN DNA-dependent protein kinase catalytic subunit	244	5.77155	6.51451	5.51049	5.85596	6.67937	7.12376	6.12802	6.57786	6.73485	6.66458	6.35321	6.52181	6.25393	5.89347	5.77857	5.63807	5.91313	6.62725	6.56861	5.89101	1.12077	1.11085	0.99626	0.16449	0.151667	-0.00540638	0.072219	0.0616574	0.0256909	0.0447336
sp|Q9NZD8|SPG21_HUMAN	SPG21	SPG21_HUMAN Maspardin	8	5.62098	6.25635	5.72559	6.3142	6.6425	6.50812	5.99219	6.51654	6.57457	6.75329	6.36378	6.8731	6.44776	5.63285	5.99654	5.78164	5.97928	6.41484	6.64119	5.9647	1.07284	1.1107	0.997561	0.101441	0.151469	-0.0035228	0.0596538	0.0449567	0.0334155	0.0595106
sp|O15066|KIF3B_HUMAN	KIF3B	KIF3B_HUMAN Kinesin-like protein KIF3B	11	5.78319	6.32169	5.65514	6.20405	6.73347	6.53192	6.26531	6.3232	6.58198	6.54612	6.70203	6.7863	6.4259	5.84479	5.92283	5.37209	5.99102	6.46347	6.65411	5.8914	1.07886	1.11068	0.983373	0.109509	0.151444	-0.0241899	0.0537196	0.0330054	0.0166073	0.0732395
sp|P52732|KIF11_HUMAN	KIF11	KIF11_HUMAN Kinesin-like protein KIF11	39	5.81499	6.1736	5.81475	6.02768	6.51717	6.76444	6.46699	6.56687	6.73408	6.54904	6.64969	6.53068	6.01155	5.87917	5.99235	5.50694	5.95775	6.57887	6.61587	5.8475	1.10425	1.11046	0.981494	0.14307	0.151163	-0.0269482	0.0294431	0.0198	0.0142972	0.0400913
sp|Q9Y2Q3-2|GSTK1_HUMAN	GSTK1	GSTK1_HUMAN Isoform 2 of Glutathione S-transferase kappa 1	22	5.94674	6.49535	5.49979	5.72414	6.87159	7.14451	6.13585	6.49243	6.97291	6.6201	6.34725	6.3387	6.2003	5.88387	5.99162	5.33486	5.91651	6.66109	6.56974	5.85266	1.12585	1.11041	0.989209	0.171014	0.151091	-0.0156521	0.0721475	0.0661421	0.0454914	0.0631077
tr|H0YEX5|H0YEX5_HUMAN	SF3B2	H0YEX5_HUMAN Splicing factor 3B subunit 2 (Fragment)	1	6.4479	5.93627	5.25218	4.74628	8.47604	7.51654	7.3357	8.13424	6.11722	6.92344	5.24803	6.5621	5.07579	5.63337	4.92699	5.6679	5.59566	7.86563	6.2127	5.32601	1.40567	1.11027	0.951812	0.491255	0.150912	-0.0712518	0.133804	0.0675711	0.116328	0.0713468
sp|Q86VX9-3|MON1A_HUMAN	MON1A	MON1A_HUMAN Isoform 3 of Vacuolar fusion protein MON1 homolog A	2	6.00402	6.7663	5.25574	6.10863	6.14949	5.72555	6.68822	6.66111	6.7023	6.61361	6.24491	7.23419	6.63241	5.57594	5.53248	6.10509	6.03367	6.30609	6.69875	5.96148	1.04515	1.11023	0.988035	0.0637099	0.150856	-0.0173659	0.102543	0.0728771	0.0609395	0.0868092
sp|Q567V2|M17L2_HUMAN	MPV17L2	M17L2_HUMAN Mpv17-like protein 2	5	6.04296	6.35158	5.90794	5.65612	6.99661	6.94859	6.05394	6.44388	6.86574	6.45131	6.62713	6.65098	5.79198	6.04719	5.66802	5.49604	5.98965	6.61076	6.64879	5.75081	1.1037	1.11005	0.960124	0.142343	0.15062	-0.0587072	0.0483644	0.0677005	0.0255449	0.0403204
sp|Q8TDJ6-3|DMXL2_HUMAN	DMXL2	DMXL2_HUMAN Isoform 3 of DmX-like protein 2	3	5.83195	6.61727	6.04433	5.9828	6.202	6.58415	6.28525	6.17278	6.97022	6.29442	7.61827	6.28612	6.24462	5.50593	5.70314	5.65674	6.11909	6.31104	6.79226	5.77761	1.03137	1.11001	0.944194	0.0445624	0.150575	-0.0828443	0.0562008	0.029821	0.0938094	0.055823
sp|Q9H4Z3|PCIF1_HUMAN	PCIF1	PCIF1_HUMAN Phosphorylated CTD-interacting factor 1	5	5.85934	6.58734	5.65201	6.18969	6.90032	6.47002	6.56491	6.38077	6.57166	6.94738	6.96358	6.47557	5.67701	5.65282	5.56395	5.54364	6.0721	6.57901	6.73955	5.60935	1.08348	1.10992	0.923792	0.115675	0.150457	-0.114359	0.0673035	0.034507	0.0374641	0.0116659
sp|Q6P1X5|TAF2_HUMAN	TAF2	TAF2_HUMAN Transcription initiation factor TFIID subunit 2	7	5.61292	6.24123	6.00365	5.702	6.75834	6.75892	6.13373	6.61266	6.62649	6.65568	6.40276	6.46334	6.1759	5.85797	5.84351	6.1509	5.88995	6.56591	6.53707	6.00707	1.11477	1.10987	1.01988	0.15674	0.150388	0.0284061	0.048854	0.0451155	0.0188474	0.0301143
sp|Q15742|NAB2_HUMAN	NAB2	NAB2_HUMAN NGFI-A-binding protein 2	18	5.89498	6.65764	5.55532	5.98903	6.88137	6.8402	6.51851	6.21652	6.74988	6.59691	6.57038	6.82337	5.93521	5.67835	5.83912	5.25321	6.02424	6.61415	6.68513	5.67647	1.09792	1.10971	0.942272	0.134776	0.150177	-0.0857852	0.0766121	0.0469879	0.0181678	0.0530991
sp|Q9BW60|ELOV1_HUMAN	ELOVL1	ELOV1_HUMAN Elongation of very long chain fatty acids protein 1	1	6.48061	6.24267	5.47123	5.69218	6.40697	6.81778	7.05088	6.47067	7.40595	6.78408	6.06607	6.25004	6.02913	5.54841	5.83215	5.45116	5.97167	6.68657	6.62654	5.71521	1.11972	1.10966	0.957054	0.163132	0.15012	-0.0633279	0.0786048	0.045257	0.0908872	0.0462673
sp|Q6ZS30|NBEL1_HUMAN	NBEAL1	NBEL1_HUMAN Neurobeachin-like protein 1	3	5.53867	5.9934	6.13793	6.19908	6.86046	6.51502	6.42092	6.36887	6.68029	7.23711	6.15885	6.4091	5.53299	6.22651	5.78039	5.94043	5.96727	6.54132	6.62134	5.87008	1.0962	1.10961	0.983713	0.13251	0.150052	-0.0236909	0.0500168	0.0338145	0.069843	0.0495366
sp|P36915|GNL1_HUMAN	GNL1	GNL1_HUMAN Guanine nucleotide-binding protein-like 1	21	5.88761	6.48354	5.60896	5.83966	6.9729	7.17213	6.57209	6.36722	6.845	6.74195	6.51369	6.32897	5.91523	5.79025	5.70342	5.2574	5.95494	6.77109	6.6074	5.66658	1.13705	1.10957	0.951575	0.185299	0.149996	-0.0716106	0.0626037	0.0542148	0.0350458	0.0505247
sp|Q6UWP2|DHR11_HUMAN	DHRS11	DHR11_HUMAN Dehydrogenase/reductase SDR family member 11	3	5.66526	6.27726	6.28981	5.98546	6.3025	6.56796	6.6434	5.83762	7.16217	6.50782	6.5764	6.62398	5.63751	6.3535	5.78787	5.78148	6.05445	6.33787	6.71759	5.89009	1.04681	1.10953	0.972853	0.0660028	0.149949	-0.0397056	0.0487424	0.0574544	0.044688	0.0537588
sp|Q8IWV7|UBR1_HUMAN	UBR1	UBR1_HUMAN E3 ubiquitin-protein ligase UBR1	25	5.7916	6.21154	5.79752	6.11012	6.7778	6.80452	6.19632	6.28886	6.62316	6.37594	6.61927	6.9093	5.93991	6.06203	5.89821	5.59391	5.9777	6.51687	6.63192	5.87352	1.0902	1.10944	0.982572	0.124591	0.149837	-0.0253651	0.0360498	0.0489727	0.0328863	0.0338712
sp|Q96RR4|KKCC2_HUMAN	CAMKK2	KKCC2_HUMAN Calcium/calmodulin-dependent protein kinase kinase 2	7	5.62892	6.08456	6.00083	6.17788	6.58228	6.65247	6.48388	6.51012	6.62538	6.53273	6.84425	6.50131	6.09612	5.61542	6.16913	5.49472	5.97305	6.55719	6.62592	5.84385	1.0978	1.1093	0.97837	0.13461	0.149653	-0.0315487	0.0402719	0.0115802	0.0233614	0.057905
sp|P43353|AL3B1_HUMAN	ALDH3B1	AL3B1_HUMAN Aldehyde dehydrogenase family 3 member B1	4	5.72364	6.458	5.27658	6.12802	6.70916	6.65583	6.27037	6.50251	6.95714	6.33962	6.3998	6.46734	6.26218	6.02222	5.9977	5.82987	5.89656	6.53447	6.54097	6.02799	1.10818	1.10929	1.02229	0.148196	0.149632	0.0318041	0.0866442	0.0300945	0.0431596	0.0295282
sp|Q5SRE5|NU188_HUMAN	NUP188	NU188_HUMAN Nucleoporin NUP188 homolog	32	5.72536	6.40906	5.51519	5.95078	6.6062	6.84843	6.30764	6.48551	6.75693	6.26232	6.38985	6.76789	6.25235	5.91718	5.80133	6.00397	5.9001	6.56194	6.54425	5.99371	1.11218	1.10918	1.01587	0.153385	0.149489	0.0227099	0.0649313	0.0345888	0.0393132	0.0319284
sp|Q9H857|NT5D2_HUMAN	NT5DC2	NT5D2_HUMAN 5'-nucleotidase domain-containing protein 2	21	5.86618	6.15219	5.7822	6.00184	6.63061	6.69433	6.28508	6.4769	6.64013	6.61354	6.55994	6.58503	6.08475	5.91755	5.91229	5.79743	5.9506	6.52173	6.59966	5.92801	1.09598	1.10907	0.996202	0.132219	0.149356	-0.00548908	0.0272271	0.0279469	0.00526506	0.0199538
sp|Q9H4A5|GLP3L_HUMAN	GOLPH3L	GLP3L_HUMAN Golgi phosphoprotein 3-like	5	5.87822	6.34286	5.89091	5.95138	6.57973	6.70181	5.92074	6.08742	6.50112	6.46466	6.81766	6.90433	6.10399	5.98659	5.89783	5.97075	6.01584	6.32243	6.67194	5.98979	1.05096	1.10906	0.995669	0.0717112	0.14934	-0.00626137	0.036626	0.0596521	0.033221	0.0142548
sp|P19367-3|HXK1_HUMAN	HK1	HXK1_HUMAN Isoform 3 of Hexokinase-1	42	5.81269	6.33678	5.56345	6.03472	6.88274	6.90109	6.20966	6.59224	6.91679	6.60178	6.42263	6.39577	6.2489	5.74114	6.00495	5.33469	5.93691	6.64643	6.58424	5.83242	1.11951	1.10904	0.9824	0.162868	0.149305	-0.0256176	0.0553855	0.048707	0.0364228	0.0670863
sp|Q7L9B9|EEPD1_HUMAN	EEPD1	EEPD1_HUMAN Endonuclease/exonuclease/phosphatase family domain-containing protein 1	1	6.37636	5.73628	6.27868	5.76247	6.60033	5.8514	6.5297	6.13406	6.51387	5.84371	7.21558	7.21296	6.26443	5.21764	6.56055	5.90198	6.03845	6.27887	6.69653	5.98615	1.03982	1.10898	0.991339	0.0563278	0.149236	-0.0125492	0.0556991	0.0559282	0.0981799	0.0966917
sp|Q8IY22|CMIP_HUMAN	CMIP	CMIP_HUMAN C-Maf-inducing protein	5	5.92168	6.5097	5.33975	6.00424	6.61466	6.66543	5.90192	6.33152	6.8138	6.74118	6.21231	6.59781	6.56894	6.04955	5.90284	5.82468	5.94384	6.37838	6.59128	6.0865	1.07311	1.10892	1.024	0.101795	0.149162	0.0342176	0.0806425	0.0548681	0.0406762	0.0550169
sp|Q96D31|CRCM1_HUMAN	ORAI1	CRCM1_HUMAN Calcium release-activated calcium channel protein 1	2	6.0322	6.137	6.44341	4.93928	6.38082	6.10301	7.22517	6.61871	6.73488	6.58807	6.43434	6.35724	6.06492	6.09627	5.97652	5.86816	5.88797	6.58193	6.52863	6.00147	1.11786	1.10881	1.01928	0.160739	0.14901	0.0275444	0.111428	0.0725949	0.0256819	0.0170489
sp|Q86UW8|HPLN4_HUMAN	HAPLN4	HPLN4_HUMAN Hyaluronan and proteoglycan link protein 4	1	6.0628	5.85429	5.31674	6.61518	5.39492	6.57376	8.19877	6.04501	5.78446	5.37937	8.82437	6.45483	5.00283	5.10721	5.67431	7.71117	5.96225	6.55312	6.61076	5.87388	1.0991	1.10877	0.985178	0.136323	0.148958	-0.0215437	0.0900489	0.182869	0.233096	0.21449
sp|Q147X3|NAA30_HUMAN	NAA30	NAA30_HUMAN N-alpha-acetyltransferase 30	7	5.7433	6.23939	5.83071	5.80927	6.1238	7.02368	6.4976	6.24789	6.79484	5.94453	6.77293	6.67969	6.58877	5.8751	5.97315	5.85533	5.90567	6.47324	6.548	6.07309	1.09611	1.10877	1.02835	0.132388	0.148954	0.04033	0.0381955	0.0615651	0.0619117	0.0572406
sp|P49411|EFTU_HUMAN	TUFM	EFTU_HUMAN Elongation factor Tu, mitochondrial	92	5.96578	6.57777	5.1856	5.79184	7.01183	7.10109	6.08408	6.33735	7.02737	6.68345	6.17135	6.1928	6.57839	6.01258	5.80828	5.47042	5.88025	6.63359	6.51874	5.96742	1.12811	1.10858	1.01482	0.173912	0.148717	0.0212298	0.0974062	0.0754414	0.0634203	0.0778621
sp|Q13200|PSMD2_HUMAN	PSMD2	PSMD2_HUMAN 26S proteasome non-ATPase regulatory subunit 2	73	5.96551	6.51086	5.49128	5.79724	6.8736	7.03433	6.24592	6.43566	6.82666	7.01949	6.401	6.09705	6.23576	5.866	5.72667	5.47296	5.94122	6.64738	6.58605	5.82535	1.11886	1.10853	0.980496	0.162025	0.148654	-0.0284157	0.071954	0.055403	0.0631614	0.054646
sp|Q15629|TRAM1_HUMAN	TRAM1	TRAM1_HUMAN Translocating chain-associated membrane protein 1	7	5.67425	6.32888	5.65319	6.06888	6.38107	7.05878	6.06258	6.58632	6.65054	6.96884	6.44205	6.23417	5.84941	5.8612	6.35996	5.81989	5.9313	6.52219	6.5739	5.97262	1.09962	1.10834	1.00697	0.137008	0.148401	0.0100144	0.0550995	0.0640293	0.0476728	0.0433334
sp|Q8IWV8-4|UBR2_HUMAN	UBR2	UBR2_HUMAN Isoform 4 of E3 ubiquitin-protein ligase UBR2	24	5.7703	6.27965	5.96356	6.0475	6.67429	6.80422	6.50352	6.28053	6.87424	6.56254	6.65323	6.57721	5.89318	5.74438	5.87788	5.49376	6.01525	6.56564	6.66681	5.7523	1.0915	1.10832	0.956286	0.12631	0.14837	-0.0644864	0.035085	0.0344939	0.0215829	0.0321373
sp|Q9H0R1|AP5M1_HUMAN	AP5M1	AP5M1_HUMAN AP-5 complex subunit mu-1	2	4.97144	6.50273	5.86303	6.40267	6.25238	6.73936	5.7374	5.88226	6.45945	5.68071	7.30537	6.86454	6.5177	5.99197	5.96954	6.85947	5.93497	6.15285	6.57752	6.33467	1.03671	1.10827	1.06735	0.0520147	0.148303	0.0940293	0.118132	0.0726669	0.104978	0.0681843
sp|Q13574|DGKZ_HUMAN	DGKZ	DGKZ_HUMAN Diacylglycerol kinase zeta	7	5.67201	6.17783	5.78744	6.30945	6.51294	7.04092	5.95428	5.6158	6.49534	6.96688	6.13391	6.94054	6.24662	6.2279	5.73092	6.18722	5.98668	6.28099	6.63417	6.09816	1.04916	1.10815	1.01862	0.0692341	0.148159	0.0266184	0.050979	0.0998727	0.0599217	0.0403535
sp|Q15118|PDK1_HUMAN	PDK1	PDK1_HUMAN [Pyruvate dehydrogenase (acetyl-transferring)] kinase isozyme 1, mitochondrial	4	6.3301	6.33679	5.60363	5.81419	6.0968	6.81506	6.71497	6.15294	6.55977	6.45841	7.02672	6.64351	5.54717	6.48524	6.20116	5.21354	6.02118	6.44494	6.6721	5.86178	1.07038	1.10811	0.973527	0.0981218	0.148096	-0.0387074	0.0615644	0.0578043	0.0372041	0.099624
sp|Q5TGY1|TMCO4_HUMAN	TMCO4	TMCO4_HUMAN Transmembrane and coiled-coil domain-containing protein 4	1	5.51798	6.23629	5.8621	6.59847	6.51883	5.66564	6.02741	6.67809	6.35664	6.8932	6.57474	7.00747	6.28748	5.96164	6.40591	5.40811	6.05371	6.22249	6.70801	6.01579	1.02788	1.10808	0.993735	0.039673	0.148066	-0.00906656	0.0771164	0.0744318	0.0443228	0.0742294
tr|U3KPW6|U3KPW6_HUMAN	VPS11	U3KPW6_HUMAN Vacuolar protein sorting-associated protein 11 homolog	16	5.65849	6.52659	5.7277	6.10957	6.61455	6.8358	6.30669	6.47225	6.53738	6.74348	6.63056	6.70614	5.95916	5.68772	5.79868	5.68525	6.00559	6.55732	6.65439	5.7827	1.09187	1.10803	0.962887	0.126801	0.148001	-0.0545615	0.0666015	0.0342001	0.0136838	0.0223053
sp|Q9H6T0|ESRP2_HUMAN	ESRP2	ESRP2_HUMAN Epithelial splicing regulatory protein 2	8	5.84835	6.46248	5.63017	5.75593	6.90188	7.03612	6.15428	6.36074	6.77017	6.61843	6.43752	6.43007	6.19861	5.6622	6.09947	5.63359	5.92423	6.61326	6.56405	5.89847	1.11631	1.108	0.995651	0.158732	0.147957	-0.00628809	0.0624224	0.0639478	0.0247849	0.0495699
sp|Q96GX1|TECT2_HUMAN	TCTN2	TECT2_HUMAN Tectonic-2	2	5.00994	6.38496	6.72984	5.69648	7.06819	5.32514	6.30497	6.48815	5.73952	5.83062	7.54634	7.26591	6.1575	5.50562	5.7209	7.22591	5.95531	6.29661	6.5956	6.15248	1.05731	1.10752	1.03311	0.0804005	0.147328	0.0469933	0.128074	0.115104	0.143069	0.124386
sp|O94808|GFPT2_HUMAN	GFPT2	GFPT2_HUMAN Glutamine--fructose-6-phosphate aminotransferase [isomerizing] 2	7	5.5731	6.32685	5.95154	5.97582	6.35462	6.41954	6.15847	6.47685	6.20753	6.36475	7.195	6.61889	6.37592	6.17882	5.95964	5.86266	5.95683	6.35237	6.59654	6.09426	1.0664	1.10739	1.02307	0.0927508	0.147166	0.0329069	0.0517018	0.0218147	0.0657129	0.0376862
sp|Q9H115|SNAB_HUMAN	NAPB	SNAB_HUMAN Beta-soluble NSF attachment protein	4	5.75761	6.22719	5.57535	6.25395	6.19646	6.14873	6.55697	6.72373	6.49331	6.10021	6.97279	6.80466	6.05957	6.28769	5.86866	5.97312	5.95352	6.40647	6.59274	6.04726	1.07608	1.10737	1.01574	0.105786	0.147135	0.0225375	0.0570882	0.0435791	0.0582098	0.0294814
sp|P60660|MYL6_HUMAN	MYL6	MYL6_HUMAN Myosin light polypeptide 6	4	5.61175	6.16697	6.541	5.91453	5.67119	6.44241	6.41392	5.65745	6.58543	6.62507	6.7748	6.84748	6.50291	6.41532	5.77813	6.05165	6.05856	6.04624	6.70819	6.187	0.997967	1.10723	1.0212	-0.00293669	0.146949	0.0302651	0.0649744	0.0729701	0.0184225	0.0542059
sp|Q9Y256|FACE2_HUMAN	RCE1	FACE2_HUMAN CAAX prenyl protease 2	1	5.85045	6.22373	5.62037	6.19398	6.65126	6.81809	6.33938	6.43081	6.4249	6.69454	6.91124	6.41901	6.24101	5.73338	5.70091	5.74692	5.97213	6.55988	6.61242	5.85555	1.09842	1.10721	0.98048	0.135424	0.146933	-0.0284403	0.0484395	0.0329667	0.0358524	0.0440085
sp|Q5JPH6|SYEM_HUMAN	EARS2	SYEM_HUMAN Probable glutamate--tRNA ligase, mitochondrial	11	5.84235	6.52944	5.49949	5.9645	6.76989	7.21241	6.01583	6.36178	6.8495	6.43317	6.41089	6.69515	6.19091	5.94956	5.51513	5.76002	5.95894	6.58998	6.59718	5.85391	1.1059	1.1071	0.982373	0.145217	0.146792	-0.0256576	0.0718664	0.078435	0.0321391	0.0489475
sp|Q8TAA9|VANG1_HUMAN	VANGL1	VANG1_HUMAN Vang-like protein 1	10	5.63061	6.64296	5.47087	5.86152	7.4022	7.43299	6.2364	6.39359	6.65924	6.52424	6.58059	6.36941	5.97721	5.73231	5.90916	5.1767	5.90149	6.8663	6.53337	5.69885	1.16348	1.10707	0.965662	0.218453	0.146748	-0.0504097	0.0880582	0.0931996	0.0187542	0.0637106
sp|Q96G04|FA86A_HUMAN	FAM86A	FA86A_HUMAN Protein FAM86A	2	5.21212	6.45149	5.58128	6.209	6.17392	7.1796	6.14273	6.34811	6.37429	6.43333	6.50335	6.65398	6.56064	5.66167	6.31527	6.19922	5.86347	6.46109	6.49124	6.1842	1.10192	1.10706	1.0547	0.140022	0.146738	0.0768317	0.0969297	0.0754449	0.018585	0.0613724
sp|Q8NC60|NOA1_HUMAN	NOA1	NOA1_HUMAN Nitric oxide-associated protein 1	25	5.78481	6.38439	5.67435	6.15972	6.30595	6.64524	6.10644	6.28431	6.87234	6.37267	6.55549	6.77023	6.32294	5.88882	6.00424	5.86806	6.00082	6.33549	6.64268	6.02102	1.05577	1.10696	1.00337	0.078296	0.146607	0.00484766	0.0549014	0.0355173	0.0336082	0.0348793
sp|Q6NXG1|ESRP1_HUMAN	ESRP1	ESRP1_HUMAN Epithelial splicing regulatory protein 1	20	5.93656	6.27809	5.55351	5.84689	6.99149	6.855	6.31669	6.52954	6.96769	6.40493	6.36871	6.39927	6.37587	5.76654	6.0248	5.38443	5.90376	6.67318	6.53515	5.88791	1.13033	1.10695	0.997315	0.17674	0.146586	-0.00387907	0.0505422	0.0459522	0.0441916	0.0710535
sp|Q9BSK2|S2533_HUMAN	SLC25A33	S2533_HUMAN Solute carrier family 25 member 33	2	5.63132	6.72434	5.8479	6.01173	6.43784	6.92464	6.1936	6.29151	6.66004	6.80014	6.71531	6.62914	5.93707	5.8887	5.751	5.55572	6.05382	6.4619	6.70116	5.78312	1.06741	1.10693	0.955284	0.0941115	0.146564	-0.0659977	0.0781959	0.0502035	0.0111921	0.0295464
sp|Q9HCE7|SMUF1_HUMAN	SMURF1	SMUF1_HUMAN E3 ubiquitin-protein ligase SMURF1	4	5.79028	6.31775	5.83523	6.02275	6.62459	6.80958	6.19259	6.02849	6.69074	6.70749	6.24115	6.88824	5.99803	6.31655	5.84243	5.69412	5.9915	6.41381	6.6319	5.96278	1.07048	1.10689	0.995207	0.0982643	0.146506	-0.00693212	0.0400017	0.0568227	0.0415298	0.044693
sp|Q14573|ITPR3_HUMAN	ITPR3	ITPR3_HUMAN Inositol 1,4,5-trisphosphate receptor type 3	28	5.82453	6.36884	5.61168	6.01499	6.53687	6.88594	6.04339	6.43189	6.73563	6.80667	6.31657	6.50547	6.27716	5.94369	5.8416	5.85508	5.95501	6.47452	6.59108	5.97938	1.08724	1.10681	1.00409	0.12067	0.146412	0.00589257	0.0539591	0.0535663	0.0339323	0.0340533
sp|P31751|AKT2_HUMAN	AKT2	AKT2_HUMAN RAC-beta serine/threonine-protein kinase	15	5.79031	6.04956	5.84673	6.35658	6.30584	6.64098	6.34792	6.30946	6.90263	6.23042	6.63461	6.84232	6.00812	5.68027	6.28638	5.76788	6.01079	6.40105	6.6525	5.93566	1.06493	1.10676	0.9875	0.0907528	0.14634	-0.0181468	0.0425893	0.025165	0.0456823	0.0457914
sp|Q9HBL8|NMRL1_HUMAN	NMRAL1	NMRL1_HUMAN NmrA-like family domain-containing protein 1	8	5.63325	6.31123	5.77411	6.03474	6.53915	6.83065	6.16155	6.33041	6.54369	6.38558	6.64838	6.71045	6.64751	5.75879	6.06742	5.62308	5.93833	6.46544	6.57203	6.0242	1.08876	1.10671	1.01446	0.122691	0.14628	0.0207118	0.0503685	0.0445948	0.0216182	0.0755681
sp|Q4G176|ACSF3_HUMAN	ACSF3	ACSF3_HUMAN Acyl-CoA synthetase family member 3, mitochondrial	14	5.63289	6.53688	5.51658	6.19522	6.45629	6.91726	5.90294	6.58131	6.61467	6.69125	6.42384	6.6989	6.46561	5.82778	5.8606	5.67797	5.97039	6.46445	6.60717	5.95799	1.08275	1.10666	0.997923	0.114702	0.146206	-0.00300008	0.0804031	0.065268	0.0193725	0.058346
sp|Q9H1I8|ASCC2_HUMAN	ASCC2	ASCC2_HUMAN Activating signal cointegrator 1 complex subunit 2	5	6.12223	6.13974	5.47966	5.95811	6.33648	7.81001	6.06504	6.3047	6.60631	7.10659	6.32184	6.19106	5.90567	6.15394	5.82749	5.67114	5.92493	6.62906	6.55645	5.88956	1.11884	1.10659	0.994029	0.162004	0.146116	-0.00863947	0.0519695	0.120163	0.0618726	0.0342004
sp|Q9UBQ7|GRHPR_HUMAN	GRHPR	GRHPR_HUMAN Glyoxylate reductase/hydroxypyruvate reductase	26	5.85667	6.12323	5.75817	5.97361	6.57749	6.72882	6.45071	6.42772	6.69803	6.46927	6.63321	6.43848	6.11892	5.65684	6.4185	5.67034	5.92792	6.54619	6.55975	5.96615	1.1043	1.10659	1.00645	0.143128	0.146114	0.00927427	0.0265167	0.021146	0.0191642	0.0620494
sp|Q86U90|YRDC_HUMAN	YRDC	YRDC_HUMAN YrdC domain-containing protein, mitochondrial	11	5.97432	5.97947	5.42996	6.02102	6.59164	6.6469	6.47778	6.52865	6.86451	6.16812	6.36955	6.49563	6.27776	6.1145	6.2567	5.80349	5.85119	6.56124	6.47445	6.11311	1.12135	1.10652	1.04476	0.165238	0.146028	0.0631764	0.0481267	0.0112307	0.0452452	0.0357887
sp|A2RRP1|NBAS_HUMAN	NBAS	NBAS_HUMAN Neuroblastoma-amplified sequence	32	5.69067	6.40169	5.66869	5.98363	6.59983	6.9672	6.08612	6.53855	6.63615	6.72076	6.32969	6.58523	6.17186	5.87127	5.96534	5.78333	5.93617	6.54793	6.56796	5.94795	1.10306	1.10643	1.00198	0.141505	0.145912	0.00286011	0.0576035	0.0551936	0.0256386	0.028035
sp|Q8IYQ7|THNS1_HUMAN	THNSL1	THNS1_HUMAN Threonine synthase-like 1	20	5.81404	6.33954	5.65974	5.87661	6.59389	6.77972	6.42554	6.53128	6.79239	6.52388	6.47731	6.41699	6.20202	5.8792	6.00044	5.68739	5.92248	6.58261	6.55264	5.94226	1.11146	1.1064	1.00334	0.152457	0.145875	0.00481031	0.049404	0.0225814	0.0252895	0.0363274
tr|K7EMX1|K7EMX1_HUMAN	SPC24	K7EMX1_HUMAN Kinetochore protein Spc24 (Fragment)	9	5.95249	6.48221	5.51075	5.94055	6.8141	7.10404	6.62584	6.61405	6.6185	6.60051	6.67228	6.53532	5.87539	5.6414	5.74413	5.26845	5.9715	6.78951	6.60665	5.63234	1.13699	1.10636	0.943204	0.185214	0.145826	-0.0843583	0.0665954	0.0337054	0.00855048	0.0463061
sp|Q14674|ESPL1_HUMAN	ESPL1	ESPL1_HUMAN Separin	7	6.06331	6.26654	5.91886	5.83767	5.86324	6.60027	6.30198	6.2958	6.67267	6.54389	6.91758	6.51364	6.00006	6.03832	6.12896	6.03719	6.02159	6.26532	6.66195	6.05113	1.04048	1.10634	1.00491	0.0572431	0.145798	0.0070595	0.0312341	0.0484234	0.0275961	0.00906367
sp|P11586|C1TC_HUMAN	MTHFD1	C1TC_HUMAN C-1-tetrahydrofolate synthase, cytoplasmic	82	5.80675	6.57321	5.44828	5.88353	6.81852	7.09266	6.25552	6.47441	6.93828	6.61394	6.35787	6.31937	6.26029	5.87172	5.87152	5.41414	5.92794	6.66028	6.55736	5.85442	1.12354	1.10618	0.987597	0.168051	0.145585	-0.0180058	0.0793098	0.055531	0.0435572	0.0591024
sp|P36404|ARL2_HUMAN	ARL2	ARL2_HUMAN ADP-ribosylation factor-like protein 2	12	6.14268	6.49188	5.74623	5.55651	6.67453	6.59106	6.46644	6.50947	6.66933	7.19255	6.39398	6.22178	6.27773	5.78187	5.86021	5.42375	5.98433	6.56038	6.61941	5.83589	1.09626	1.10612	0.975196	0.13259	0.145514	-0.0362358	0.0697312	0.0140225	0.0640886	0.0600627
sp|P27037|AVR2A_HUMAN	ACVR2A	AVR2A_HUMAN Activin receptor type-2A	1	5.6838	5.88948	7.04148	5.04358	6.23366	6.54401	7.05016	6.46741	6.83259	7.48142	6.62163	5.23038	6.73475	5.81397	5.5345	5.79717	5.91459	6.57381	6.5415	5.9701	1.11146	1.106	1.00939	0.152453	0.145346	0.0134775	0.140864	0.052315	0.144854	0.0880362
sp|Q68CQ4|DIEXF_HUMAN	DIEXF	DIEXF_HUMAN Digestive organ expansion factor homolog	20	5.97498	6.40197	5.63641	5.91925	6.73183	6.83662	6.12156	6.33362	7.01248	6.55382	6.35414	6.54837	6.24983	5.8545	6.08091	5.38971	5.98315	6.50591	6.6172	5.89374	1.08737	1.10597	0.985056	0.120844	0.145316	-0.021723	0.0528344	0.051579	0.042224	0.0632899
sp|Q05397-2|FAK1_HUMAN	PTK2	FAK1_HUMAN Isoform 2 of Focal adhesion kinase 1	1	5.61757	6.68308	5.94353	6.07329	6.61938	6.0587	5.68904	5.72373	7.41763	6.63478	5.79206	7.04596	6.64856	6.28021	6.66174	5.11075	6.07937	6.02271	6.72261	6.17532	0.990681	1.10581	1.01578	-0.0135078	0.1451	0.0225915	0.0733301	0.0716107	0.103816	0.118441
tr|J3KR51|J3KR51_HUMAN	ZNF525	J3KR51_HUMAN HCG1787564	2	5.6717	5.75157	5.93162	5.69289	6.64473	6.07986	5.06035	6.38441	6.98036	6.61033	5.83938	6.05594	6.87371	7.22418	6.93854	6.26041	5.76195	6.04234	6.3715	6.82421	1.04866	1.10579	1.18436	0.0685509	0.145078	0.244106	0.0204885	0.114884	0.0815772	0.0594255
sp|Q58FF7|H90B3_HUMAN	HSP90AB3P	H90B3_HUMAN Putative heat shock protein HSP 90-beta-3	1	5.79563	5.28916	6.02587	6.76013	6.82996	5.43841	6.44787	5.44358	6.92861	7.65377	6.14461	5.66674	6.72339	5.98018	5.38647	7.48562	5.9677	6.03995	6.59843	6.39391	1.01211	1.10569	1.07142	0.0173634	0.144949	0.0995252	0.102448	0.117384	0.132604	0.142386
sp|Q9UH99-2|SUN2_HUMAN	SUN2	SUN2_HUMAN Isoform 2 of SUN domain-containing protein 2	11	5.57373	6.17406	6.08153	5.86707	6.54028	6.69709	6.08428	6.28828	6.75908	6.52463	6.29858	6.61658	6.60156	6.08213	6.04275	5.76837	5.9241	6.40248	6.54972	6.1237	1.08075	1.10561	1.03369	0.112036	0.144837	0.0478088	0.0450078	0.0423037	0.0295006	0.0567954
sp|Q9Y305-4|ACOT9_HUMAN	ACOT9	ACOT9_HUMAN Isoform 4 of Acyl-coenzyme A thioesterase 9, mitochondrial	22	5.7502	6.65313	5.36623	5.91252	6.88308	7.06233	6.19269	6.48914	6.84038	6.73129	6.30815	6.30094	6.19725	5.85479	5.79259	5.66527	5.92052	6.65681	6.54519	5.87748	1.12436	1.10551	0.99273	0.169107	0.144711	-0.0105274	0.0911158	0.0587703	0.0429987	0.0386745
sp|P30101|PDIA3_HUMAN	PDIA3	PDIA3_HUMAN Protein disulfide-isomerase A3	87	5.74172	6.28992	5.61234	6.02004	6.60696	6.87711	6.44031	6.55552	6.7082	6.69321	6.47218	6.28431	6.24229	5.88571	6.05904	5.51112	5.91601	6.61998	6.53947	5.92454	1.11899	1.10539	1.00144	0.162202	0.144552	0.00207987	0.0510117	0.0279521	0.0308045	0.0526124
sp|Q9HBE1|PATZ1_HUMAN	PATZ1	PATZ1_HUMAN POZ-, AT hook-, and zinc finger-containing protein 1	2	5.90711	6.00525	5.85085	6.07412	6.25692	8.15663	6.03338	6.09376	7.06871	7.09364	6.08595	6.10037	6.00149	6.05108	5.13168	6.08908	5.95933	6.63517	6.58717	5.81833	1.11341	1.10535	0.97634	0.154983	0.144507	-0.034545	0.0167188	0.153529	0.0866157	0.078918
sp|Q9BRS8|LARP6_HUMAN	LARP6	LARP6_HUMAN La-related protein 6	4	5.92513	6.59458	5.68827	6.09491	6.60498	6.5276	6.33407	6.24551	7.06452	6.22824	6.90381	6.66602	6.15095	5.45321	5.95569	5.56249	6.07572	6.42804	6.71565	5.78059	1.05799	1.10532	0.951423	0.0813229	0.144471	-0.0718405	0.0632031	0.0259334	0.0541785	0.0567258
sp|Q13315|ATM_HUMAN	ATM	ATM_HUMAN Serine-protein kinase ATM	2	6.58872	5.81796	6.85312	5.17258	8.84175	7.71691	7.54361	4.84357	5.39076	7.88552	7.04453	6.68283	5.22721	5.47515	4.56397	4.35181	6.1081	7.23646	6.75091	4.90454	1.18473	1.10524	0.802957	0.244562	0.144359	-0.316606	0.124878	0.234352	0.153659	0.108608
sp|P58004|SESN2_HUMAN	SESN2	SESN2_HUMAN Sestrin-2	2	4.90231	6.20792	6.06721	6.25952	6.21065	7.29712	6.3457	5.53009	7.15023	6.7037	6.3896	5.65978	6.23309	5.50826	7.03353	6.50128	5.85924	6.34589	6.47583	6.31904	1.08306	1.10523	1.07847	0.115109	0.144351	0.108992	0.10976	0.114673	0.0968514	0.100439
sp|Q5T4S7-2|UBR4_HUMAN	UBR4	UBR4_HUMAN Isoform 2 of E3 ubiquitin-protein ligase UBR4	119	5.76689	6.46482	5.67698	5.98157	6.68258	7.0524	6.21145	6.44154	6.74335	6.62493	6.50638	6.52854	6.1062	5.86492	5.77049	5.57696	5.97256	6.59699	6.6008	5.82964	1.10455	1.10519	0.97607	0.143458	0.14429	-0.0349432	0.0589644	0.0544811	0.0163727	0.037722
sp|Q9BUN8|DERL1_HUMAN	DERL1	DERL1_HUMAN Derlin-1	2	6.05783	5.93019	5.20556	6.92673	5.88712	6.97814	6.14777	6.70204	6.76287	7.20655	6.35546	6.33221	5.97604	6.03898	5.44373	6.04877	6.03008	6.42877	6.66427	5.87688	1.06612	1.10517	0.974594	0.0923656	0.144271	-0.0371261	0.117051	0.0777147	0.0618334	0.0494411
sp|P45954|ACDSB_HUMAN	ACADSB	ACDSB_HUMAN Short/branched chain specific acyl-CoA dehydrogenase, mitochondrial	16	5.75732	6.81217	5.56676	5.9516	6.5958	7.21651	6.1997	6.13158	6.81525	7.07574	6.35905	6.36985	5.89314	6.02632	5.77388	5.45532	6.02196	6.5359	6.65497	5.78716	1.08534	1.10512	0.96101	0.118152	0.144199	-0.0573769	0.0912882	0.0761593	0.0528847	0.0421759
sp|Q9NYL2-2|MLTK_HUMAN	MLTK	MLTK_HUMAN Isoform 2 of Mitogen-activated protein kinase kinase kinase MLT	5	5.83555	5.96044	5.73567	6.31399	7.16579	6.45075	5.72494	6.18244	6.85941	6.35415	6.46978	6.66739	6.19716	5.98964	6.3346	5.7583	5.96141	6.38098	6.58768	6.06992	1.07038	1.10505	1.0182	0.0981238	0.144117	0.0260245	0.0423385	0.0944898	0.0337875	0.0414382
sp|Q9NUQ7|UFSP2_HUMAN	UFSP2	UFSP2_HUMAN Ufm1-specific protease 2	11	5.88522	6.25291	5.6413	5.9056	6.47766	6.97353	6.32768	6.50772	6.84348	6.62947	6.37873	6.31971	6.17677	5.98682	6.04627	5.64713	5.92126	6.57165	6.54285	5.96425	1.10984	1.10498	1.00726	0.150352	0.144015	0.0104365	0.0424916	0.0424939	0.0368727	0.0378601
sp|Q9UL03|INT6_HUMAN	INTS6	INT6_HUMAN Integrator complex subunit 6	12	5.71261	6.19572	5.81622	6.42457	6.69707	6.7319	6.14518	6.17779	6.74819	6.75299	6.56057	6.62177	6.08566	5.83842	5.82714	5.66421	6.03728	6.43798	6.67088	5.85386	1.06637	1.10495	0.969618	0.0927105	0.143978	-0.0445111	0.0548837	0.0496845	0.0142998	0.029695
sp|Q9Y285|SYFA_HUMAN	FARSA	SYFA_HUMAN Phenylalanine--tRNA ligase alpha subunit	31	5.92896	6.63933	5.42677	5.81365	7.04625	7.08539	6.23115	6.53676	6.8398	6.79794	6.22369	6.44554	6.26511	5.64403	5.66471	5.41091	5.95218	6.72489	6.57674	5.74619	1.12982	1.10493	0.965393	0.176093	0.143956	-0.0508119	0.0850027	0.0614555	0.0447615	0.0634481
sp|Q9Y620|RA54B_HUMAN	RAD54B	RA54B_HUMAN DNA repair and recombination protein RAD54B	12	5.7421	6.17659	5.93183	5.99911	6.43022	6.83395	6.10337	6.35715	6.82381	6.36542	6.48297	6.67928	6.37063	5.89221	6.06681	5.74456	5.96241	6.43117	6.58787	6.01855	1.07862	1.1049	1.00942	0.109187	0.143917	0.0135216	0.0301101	0.0470918	0.0309242	0.0447197
tr|H3BMB6|H3BMB6_HUMAN	SPINT1	H3BMB6_HUMAN Kunitz-type protease inhibitor 1 (Fragment)	1	6.09481	4.31635	7.20684	6.88967	5.78357	4.83118	5.03729	4.2268	5.98906	5.70155	7.64914	7.73829	7.44984	6.12472	7.53113	7.42976	6.12692	4.96971	6.76951	7.13386	0.811127	1.10488	1.16435	-0.302	0.14389	0.219522	0.211281	0.129263	0.158687	0.0945053
sp|O15047|SET1A_HUMAN	SETD1A	SET1A_HUMAN Histone-lysine N-methyltransferase SETD1A	13	5.90956	6.39275	5.74219	6.10417	6.37026	6.81049	6.22181	6.25765	6.41815	6.55899	7.01287	6.69111	6.13849	5.69554	5.94928	5.7267	6.03717	6.41505	6.67028	5.8775	1.06259	1.10487	0.973553	0.0875892	0.143875	-0.0386686	0.046283	0.0422609	0.0380999	0.0352972
sp|Q86VV8|RTTN_HUMAN	RTTN	RTTN_HUMAN Rotatin	8	5.59443	6.15385	5.90889	6.38655	6.46151	6.63359	6.22232	6.35644	6.88978	6.53548	6.39339	6.74458	5.76592	6.14119	6.05353	5.75855	6.01093	6.41846	6.64081	5.9298	1.0678	1.10479	0.986503	0.0946401	0.14377	-0.0196054	0.0564494	0.0270531	0.0331131	0.0331865
sp|Q9C0B7|TNG6_HUMAN	TANGO6	TNG6_HUMAN Transport and Golgi organization protein 6 homolog	9	5.73965	6.47296	5.65469	6.13199	6.53514	6.62563	6.28982	6.44238	6.60738	6.41213	6.76204	6.73015	6.05139	6.07033	5.7698	5.70453	5.99982	6.47324	6.62792	5.89901	1.07891	1.10469	0.983198	0.109569	0.143637	-0.0244464	0.0629637	0.0221453	0.0239234	0.032028
sp|Q9BV79|MECR_HUMAN	MECR	MECR_HUMAN Trans-2-enoyl-CoA reductase, mitochondrial	6	5.84834	6.85617	5.79992	5.61206	6.46675	6.3452	6.59944	6.57256	6.91341	6.60016	6.55744	6.56854	6.0714	5.88676	6.0531	5.24875	6.02912	6.49599	6.65989	5.815	1.07743	1.10462	0.964486	0.107601	0.14355	-0.0521682	0.0929992	0.0178106	0.0255231	0.0664715
sp|O43303|CP110_HUMAN	CCP110	CP110_HUMAN Centriolar coiled-coil protein of 110 kDa	3	5.42214	6.63959	5.80442	6.45532	6.38922	6.63979	6.50417	5.67269	6.86398	6.53918	6.28856	7.17404	6.02933	5.91095	5.99585	5.67078	6.08037	6.30147	6.71644	5.90173	1.03636	1.10461	0.97062	0.0515293	0.143538	-0.0430212	0.0931669	0.0684783	0.057386	0.0274202
sp|Q86Y07|VRK2_HUMAN	VRK2	VRK2_HUMAN Serine/threonine-protein kinase VRK2	5	5.67722	6.56827	5.76438	5.89183	6.4288	6.78396	6.14187	5.91644	6.26819	6.59136	6.86128	6.68005	6.16521	5.99782	6.05029	6.21304	5.97542	6.31777	6.60022	6.10659	1.05729	1.10456	1.02195	0.0803735	0.143473	0.0313257	0.0677669	0.0593418	0.0376087	0.0163124
sp|O14782|KIF3C_HUMAN	KIF3C	KIF3C_HUMAN Kinesin-like protein KIF3C	7	5.92367	6.3376	5.54515	6.02959	6.88662	6.80259	6.32135	6.13631	7.02509	6.48469	6.30865	6.50878	6.79955	5.93022	5.79428	5.16585	5.959	6.53672	6.5818	5.92247	1.09695	1.10451	0.99387	0.133495	0.143412	-0.00887065	0.0548796	0.0558492	0.0469014	0.113612
sp|O15554|KCNN4_HUMAN	KCNN4	KCNN4_HUMAN Intermediate conductance calcium-activated potassium channel protein 4	4	5.82392	6.13279	6.15453	5.65614	6.47439	6.3912	6.30527	6.35813	6.41639	6.18354	6.76904	6.88094	6.64629	6.09495	5.90549	5.80697	5.94185	6.38225	6.56248	6.11342	1.07412	1.10445	1.02888	0.103154	0.14333	0.0410699	0.0409058	0.0111079	0.0489064	0.0613086
sp|P40938|RFC3_HUMAN	RFC3	RFC3_HUMAN Replication factor C subunit 3	14	5.85604	6.75361	5.54855	5.69508	6.89261	7.33528	6.27744	6.25172	6.81632	6.93166	6.28823	6.30697	6.19225	5.95621	5.54503	5.35302	5.96332	6.68926	6.5858	5.76163	1.12173	1.10438	0.966178	0.165731	0.143242	-0.0496394	0.0908251	0.0781442	0.0510464	0.0662553
sp|Q9Y6V7|DDX49_HUMAN	DDX49	DDX49_HUMAN Probable ATP-dependent RNA helicase DDX49	7	5.44511	6.002	6.01365	6.11268	6.58547	7.13609	6.02489	6.51365	6.71872	6.74741	6.23152	6.33195	6.20227	6.02956	5.77975	6.12529	5.89336	6.56503	6.5074	6.03422	1.11397	1.10419	1.0239	0.15571	0.142991	0.0340763	0.0514021	0.0692979	0.0405755	0.0304542
sp|Q9Y6I4|UBP3_HUMAN	USP3	UBP3_HUMAN Ubiquitin carboxyl-terminal hydrolase 3	16	5.81676	6.20317	5.89172	5.88454	6.55424	6.9309	6.41741	6.3823	6.83703	6.39101	6.41291	6.62894	6.13759	5.89978	5.93741	5.67427	5.94905	6.57121	6.56747	5.91226	1.10458	1.10395	0.993817	0.143501	0.14268	-0.00894837	0.029038	0.0381972	0.0318751	0.0321219
sp|Q8TDW0|LRC8C_HUMAN	LRRC8C	LRC8C_HUMAN Leucine-rich repeat-containing protein 8C	7	5.65839	6.16952	5.63153	6.11729	6.6758	6.46787	6.06037	6.24114	6.57607	5.96183	6.69914	6.78883	6.53494	6.06856	6.07387	6.27485	5.89418	6.3613	6.50647	6.23806	1.07925	1.10388	1.05834	0.110029	0.142583	0.0818045	0.0489931	0.0421095	0.057392	0.035265
sp|P28749|RBL1_HUMAN	RBL1	RBL1_HUMAN Retinoblastoma-like protein 1	4	5.84731	6.54988	5.50989	6.04323	6.33076	6.75157	5.8445	6.91396	7.1074	6.56374	6.24545	6.51923	6.4664	5.35897	6.0858	5.86191	5.98758	6.4602	6.60895	5.94327	1.07893	1.10378	0.9926	0.109606	0.14245	-0.0107155	0.0726163	0.0740554	0.054603	0.0778365
sp|Q13363|CTBP1_HUMAN	CTBP1	CTBP1_HUMAN C-terminal-binding protein 1	11	5.99477	6.55091	5.63096	5.92391	7.01471	6.57689	6.54977	6.18777	6.39922	6.8667	6.80338	6.53037	6.28015	5.86711	5.67121	5.15216	6.02514	6.58228	6.64992	5.74266	1.09247	1.1037	0.953116	0.127594	0.142342	-0.0692756	0.0637772	0.0514239	0.0333652	0.081564
sp|Q9Y6W3|CAN7_HUMAN	CAPN7	CAN7_HUMAN Calpain-7	17	5.79526	6.21431	5.63359	6.13973	6.6552	6.68369	6.28368	6.38112	6.7138	6.47968	6.45088	6.60336	6.42312	5.88271	5.96023	5.69965	5.94572	6.50092	6.56193	5.99143	1.09338	1.10364	1.00769	0.128792	0.142268	0.0110476	0.0465534	0.0306045	0.0184303	0.0513791
sp|Q6ZNJ1|NBEL2_HUMAN	NBEAL2	NBEL2_HUMAN Neurobeachin-like protein 2	13	5.93298	6.55477	5.44131	6.10783	6.64412	7.33446	6.05577	6.51025	6.79059	6.67694	6.36653	6.69185	6.01498	5.64048	5.83091	5.40624	6.00922	6.63615	6.63148	5.72315	1.10433	1.10355	0.952395	0.143168	0.142152	-0.0703683	0.0766022	0.0797561	0.0276997	0.0455685
sp|Q9P2J5|SYLC_HUMAN	LARS	SYLC_HUMAN Leucine--tRNA ligase, cytoplasmic	58	5.91149	6.4344	5.45427	5.79644	6.67323	6.98851	6.04447	6.45482	6.92142	6.47723	6.24372	6.39621	6.41508	5.95869	6.14197	5.68804	5.89915	6.54026	6.50964	6.05095	1.10868	1.10349	1.02573	0.14884	0.142072	0.0366534	0.0688655	0.0606297	0.0447161	0.0505871
sp|Q8WUH2|TGFA1_HUMAN	TGFBRAP1	TGFA1_HUMAN Transforming growth factor-beta receptor-associated protein 1	6	5.84656	6.71779	5.53912	5.95273	6.63865	7.2051	6.45606	6.56358	6.705	6.61655	6.45409	6.76966	5.66763	6.12819	5.37954	5.35974	6.01405	6.71585	6.63632	5.63377	1.11669	1.10347	0.936769	0.159233	0.142048	-0.0942349	0.0832838	0.0498322	0.0206051	0.0636139
sp|Q8TAG9|EXOC6_HUMAN	EXOC6	EXOC6_HUMAN Exocyst complex component 6	11	5.72541	6.45509	5.57784	6.17957	6.80978	6.69935	6.09228	6.19635	6.60947	6.84405	6.41801	6.54175	6.22962	5.95924	5.73466	5.92754	5.98448	6.44944	6.60332	5.96277	1.07769	1.10341	0.996372	0.107949	0.141966	-0.00524381	0.0676704	0.0554672	0.0271071	0.0341641
sp|O00139-2|KIF2A_HUMAN	KIF2A	KIF2A_HUMAN Isoform 2 of Kinesin-like protein KIF2A	1	5.7001	6.43647	5.61543	5.25693	6.63279	8.23756	6.38801	5.9149	7.15792	7.12608	5.41016	5.69405	6.36943	7.28917	5.91896	4.85204	5.75223	6.79331	6.34705	6.1074	1.18099	1.10341	1.06174	0.239994	0.141965	0.0864363	0.0860455	0.148364	0.145785	0.165815
sp|P63172|DYLT1_HUMAN	DYNLT1	DYLT1_HUMAN Dynein light chain Tctex-type 1	2	5.91387	5.88012	5.26898	6.5583	6.7303	7.18947	6.52229	6.18646	6.6225	6.27296	6.71743	6.45037	5.96992	6.19674	6.26209	5.25818	5.90532	6.65713	6.51581	5.92173	1.12731	1.10338	1.00278	0.172886	0.141931	0.00400469	0.0891791	0.0630456	0.0300864	0.0776369
sp|O95759|TBCD8_HUMAN	TBC1D8	TBCD8_HUMAN TBC1 domain family member 8	3	5.87845	6.40798	5.92085	6.15929	7.02567	6.50322	5.77358	5.73638	7.29219	6.15818	6.94049	6.49414	5.66416	5.68382	6.19366	6.16794	6.09164	6.25971	6.72125	5.9274	1.02759	1.10336	0.973037	0.0392651	0.141898	-0.0394331	0.0401287	0.0991743	0.0740263	0.0494155
sp|Q99836|MYD88_HUMAN	MYD88	MYD88_HUMAN Myeloid differentiation primary response protein MyD88	7	5.84581	6.20646	5.86475	5.9535	7.07618	6.7974	6.47932	6.39775	6.72414	6.30911	6.865	6.4391	6.3008	5.29531	5.93592	5.50946	5.96763	6.68766	6.58434	5.76037	1.12066	1.10334	0.96527	0.164344	0.14188	-0.050996	0.027816	0.0465261	0.0387367	0.0777732
sp|P33991|MCM4_HUMAN	MCM4	MCM4_HUMAN DNA replication licensing factor MCM4	66	6.04319	6.58661	5.42525	5.81272	6.98823	7.07398	6.05957	6.32673	7.10347	6.57695	6.35878	6.28975	6.2972	5.89453	5.85861	5.30442	5.96694	6.61213	6.58224	5.83869	1.10813	1.10312	0.978506	0.148123	0.141586	-0.0313472	0.0813584	0.0751905	0.0559714	0.0698646
sp|Q9NYH9|UTP6_HUMAN	UTP6	UTP6_HUMAN U3 small nucleolar RNA-associated protein 6 homolog	1	5.52265	5.81027	5.77237	5.94314	6.37618	6.93315	6.85281	5.93313	6.28952	6.36751	6.01804	6.74846	6.07568	6.20983	6.86266	6.2846	5.76211	6.52382	6.35588	6.35819	1.13219	1.10305	1.10345	0.17912	0.141496	0.14202	0.0304802	0.0711576	0.0474439	0.0546131
sp|Q9Y4P1-2|ATG4B_HUMAN	ATG4B	ATG4B_HUMAN Isoform 2 of Cysteine protease ATG4B	10	6.06715	6.29612	5.53953	5.9307	6.37069	6.86482	6.20574	6.50828	6.7512	6.43147	6.50468	6.59905	5.83499	6.00121	6.14464	5.94973	5.95838	6.48738	6.5716	5.98264	1.08878	1.10292	1.00407	0.122718	0.141326	0.00586393	0.0532583	0.043219	0.020998	0.0214649
sp|P50395|GDIB_HUMAN	GDI2	GDIB_HUMAN Rab GDP dissociation inhibitor beta	49	5.79357	6.2258	5.79483	6.03899	6.71559	6.71762	6.32182	6.37333	6.73163	6.48047	6.57911	6.51237	6.25909	5.76765	6.04547	5.64267	5.9633	6.53209	6.5759	5.92872	1.09538	1.10273	0.994202	0.131434	0.141077	-0.00838965	0.0351522	0.0327761	0.0169805	0.0467578
sp|Q8TEY7|UBP33_HUMAN	USP33	UBP33_HUMAN Ubiquitin carboxyl-terminal hydrolase 33	8	5.8545	6.4453	5.4803	6.1058	6.99827	7.10138	6.39175	6.5836	6.73249	6.49286	6.50447	6.60975	5.86202	5.72843	5.61705	5.49204	5.97147	6.76875	6.58489	5.67488	1.13351	1.10272	0.950332	0.180802	0.141073	-0.0734962	0.0681945	0.0497163	0.0169427	0.0277995
sp|P49841-2|GSK3B_HUMAN	GSK3B	GSK3B_HUMAN Isoform 2 of Glycogen synthase kinase-3 beta	9	5.9846	5.42591	5.91832	6.13967	6.57891	6.9461	6.45559	6.68917	6.9888	6.62702	6.00828	6.255	6.62945	6.05293	5.88328	5.41697	5.86712	6.66744	6.46977	5.99566	1.13641	1.10272	1.02191	0.18448	0.141062	0.0312642	0.0525679	0.0313223	0.0663741	0.0835315
sp|Q96IY1|NSL1_HUMAN	NSL1	NSL1_HUMAN Kinetochore-associated protein NSL1 homolog	8	5.90096	6.37481	5.80589	6.03132	6.64246	6.7441	6.39358	6.3259	6.6964	6.42166	6.66693	6.80248	6.16371	5.36116	6.00843	5.66024	6.02825	6.52651	6.64687	5.79838	1.08266	1.10262	0.961869	0.114574	0.140937	-0.0560869	0.0412786	0.0304784	0.0242261	0.0620088
sp|O75064|DEN4B_HUMAN	DENND4B	DEN4B_HUMAN DENN domain-containing protein 4B	3	5.75045	6.54841	6.21294	5.78574	6.63832	7.27666	6.31221	6.10135	6.95037	7.32472	6.43861	6.07519	5.58567	6.36862	5.7205	4.91023	6.07439	6.58214	6.69722	5.64626	1.08359	1.10254	0.929519	0.115817	0.140825	-0.105444	0.0624817	0.0779396	0.0823108	0.105907
sp|Q9BVL4|SELO_HUMAN	SELO	SELO_HUMAN Selenoprotein O	10	5.75183	6.55876	5.57868	5.96001	6.77971	6.84644	6.20147	6.31818	6.97617	6.32245	6.41181	6.58318	5.92063	5.99688	6.15617	5.63765	5.96232	6.53645	6.5734	5.92783	1.09629	1.10249	0.994216	0.132634	0.140767	-0.00836912	0.0716324	0.0495835	0.044039	0.0365935
sp|P19174-2|PLCG1_HUMAN	PLCG1	PLCG1_HUMAN Isoform 2 of 1-phosphatidylinositol 4,5-bisphosphate phosphodiesterase gamma-1	31	5.81698	6.3058	5.68919	6.0882	6.38159	6.79801	6.30606	6.28292	6.88548	6.3899	6.55499	6.51835	6.09969	5.92162	6.17263	5.7886	5.97504	6.44215	6.58718	5.99563	1.07818	1.10245	1.00345	0.108592	0.140712	0.00496358	0.0462298	0.037403	0.0320455	0.0289681
sp|O75928|PIAS2_HUMAN	PIAS2	PIAS2_HUMAN E3 SUMO-protein ligase PIAS2	4	5.96775	5.88602	6.12883	6.2993	5.96248	6.08621	5.94759	6.30685	7.19269	6.42716	6.20925	6.93649	6.06176	6.42558	5.82195	6.34007	6.07048	6.07578	6.6914	6.16234	1.00087	1.10229	1.01513	0.00126082	0.140498	0.0216689	0.0301272	0.0273387	0.0675902	0.0446249
sp|Q86XA9|HTR5A_HUMAN	HEATR5A	HTR5A_HUMAN HEAT repeat-containing protein 5A	2	5.93236	6.08104	5.23953	6.41902	6.00085	7.10923	6.38161	6.20546	6.33742	6.96131	6.21924	6.57509	6.32634	6.14763	5.70227	6.36161	5.91799	6.42429	6.52326	6.13446	1.08555	1.10228	1.03658	0.11843	0.140488	0.0518303	0.083817	0.0750913	0.050187	0.0493886
sp|Q9HA92|RSAD1_HUMAN	RSAD1	RSAD1_HUMAN Radical S-adenosyl methionine domain-containing protein 1, mitochondrial	3	6.5871	6.10627	5.74575	5.61606	6.60734	6.67841	6.59582	6.07316	7.41567	6.47839	6.47925	6.13957	5.97429	5.79968	6.18593	5.51731	6.0138	6.48868	6.62822	5.8693	1.07897	1.10217	0.975973	0.10965	0.140346	-0.0350866	0.072308	0.0430615	0.0827953	0.0481923
sp|Q6P2P2|ANM10_HUMAN	PRMT10	ANM10_HUMAN Putative protein arginine N-methyltransferase 10	3	5.32098	5.9014	6.67953	6.29792	6.30926	6.18625	6.17841	6.02674	6.65288	6.12264	6.76522	7.13142	5.99773	6.1073	6.17599	6.14632	6.04996	6.17516	6.66804	6.10683	1.0207	1.10216	1.0094	0.0295527	0.140338	0.0134999	0.0959693	0.0187329	0.0625484	0.0127703
sp|Q9H553|ALG2_HUMAN	ALG2	ALG2_HUMAN Alpha-1,3/1,6-mannosyltransferase ALG2	13	5.83972	6.29524	5.74829	6.20317	6.63914	6.41527	6.15732	6.24676	6.59672	6.48098	6.67788	6.79137	6.42868	5.7795	5.7081	5.99187	6.02161	6.36462	6.63674	5.97704	1.05696	1.10215	0.992599	0.0799269	0.140326	-0.0107175	0.0445222	0.033304	0.0197353	0.0542609
sp|Q969F1|TF3C6_HUMAN	GTF3C6	TF3C6_HUMAN General transcription factor 3C polypeptide 6	2	5.80714	5.70235	5.10613	6.81909	6.528	7.08564	7.2524	6.89443	6.98776	6.00769	6.31819	6.51437	5.17457	6.26387	6.1254	5.41294	5.85868	6.94012	6.457	5.74419	1.18459	1.10213	0.980459	0.244385	0.14029	-0.0284703	0.121328	0.0448476	0.063613	0.092643
sp|Q15833|STXB2_HUMAN	STXBP2	STXB2_HUMAN Syntaxin-binding protein 2	19	5.95908	6.46851	5.60275	5.85014	6.62082	6.85209	6.40445	6.17199	6.63517	6.63284	6.45853	6.58919	6.30835	5.90283	5.84715	5.69612	5.97012	6.51234	6.57893	5.93861	1.09082	1.10198	0.994722	0.125416	0.140094	-0.00763403	0.0609996	0.0447401	0.0126171	0.0440347
sp|Q06210|GFPT1_HUMAN	GFPT1	GFPT1_HUMAN Glutamine--fructose-6-phosphate aminotransferase [isomerizing] 1	45	6.05801	6.17114	5.57555	5.92709	6.7967	6.85737	6.24244	6.34777	6.87045	6.50024	6.36538	6.41426	6.46838	5.93	5.86366	5.61156	5.93295	6.56107	6.53758	5.9684	1.10587	1.10191	1.00598	0.145182	0.140008	0.00859521	0.0435351	0.047415	0.0349987	0.0603921
sp|Q6IQ32|ADNP2_HUMAN	ADNP2	ADNP2_HUMAN ADNP homeobox protein 2	2	5.32322	6.11326	6.13859	6.19753	6.14499	6.53538	6.01823	6.44586	6.07492	6.80427	6.6295	6.6864	5.91149	6.79837	6.24938	5.9286	5.94315	6.28611	6.54877	6.22196	1.05771	1.1019	1.04691	0.0809409	0.139997	0.0661413	0.0697932	0.0388941	0.049502	0.0666203
sp|O60826|CCD22_HUMAN	CCDC22	CCD22_HUMAN Coiled-coil domain-containing protein 22	18	5.8044	6.22349	5.8031	6.15099	6.687	6.61425	6.30611	6.10782	6.64011	6.3765	6.61772	6.79035	6.24893	5.809	6.15898	5.66124	5.9955	6.4288	6.60617	5.96954	1.07227	1.10186	0.99567	0.100669	0.139935	-0.00625971	0.0372577	0.0420408	0.0259192	0.0468617
sp|Q6P1M0|S27A4_HUMAN	SLC27A4	S27A4_HUMAN Long-chain fatty acid transport protein 4	14	5.82102	6.31467	5.6237	6.2486	6.66865	6.839	6.16111	6.29443	6.66805	6.49554	6.55479	6.73421	6.0826	5.78157	6.07066	5.64142	6.002	6.4908	6.61315	5.89406	1.08144	1.10182	0.982017	0.112953	0.139894	-0.0261804	0.0556291	0.04873	0.0163114	0.0370698
sp|Q5HYI7|MTX3_HUMAN	MTX3	MTX3_HUMAN Metaxin-3	7	5.85323	6.37907	5.90835	6.06617	6.29265	6.49874	5.94104	6.43581	6.71143	6.49069	6.62974	6.83639	6.25213	5.83227	6.03949	5.83278	6.05171	6.29206	6.66706	5.98917	1.03972	1.10168	0.989666	0.0561908	0.13971	-0.0149862	0.0390243	0.0396367	0.02176	0.0334986
sp|Q96H20|SNF8_HUMAN	SNF8	SNF8_HUMAN Vacuolar-sorting protein SNF8	6	5.77896	6.31982	5.92465	5.92002	6.03836	6.56342	6.31219	6.33703	6.65911	6.29964	6.69083	6.72513	6.54962	5.75454	6.14823	5.97845	5.98586	6.31275	6.59368	6.10771	1.05461	1.10154	1.02036	0.0767095	0.139524	0.0290724	0.0388714	0.034063	0.0300091	0.0549861
sp|A3KMH1|VWA8_HUMAN	VWA8	VWA8_HUMAN von Willebrand factor A domain-containing protein 8	44	5.88375	6.49637	5.56236	5.94626	6.78587	6.98082	6.13216	6.37009	6.98515	6.70811	6.25947	6.36008	6.31273	5.94959	5.80653	5.46067	5.97218	6.56724	6.5782	5.88238	1.09964	1.10147	0.984963	0.137027	0.139435	-0.0218589	0.0649382	0.0587781	0.0505443	0.0599683
sp|Q3KNV8-2|PCGF3_HUMAN	PCGF3	PCGF3_HUMAN Isoform 2 of Polycomb group RING finger protein 3	1	5.9233	6.055	5.98195	5.5529	6.0685	6.1951	6.09077	6.86447	6.66098	5.38363	7.82222	6.03199	6.99345	6.29785	6.12377	5.95413	5.87829	6.30471	6.47471	6.3423	1.07254	1.10146	1.07894	0.101034	0.139419	0.10961	0.0380238	0.0598333	0.16043	0.0719325
sp|Q9ULK4|MED23_HUMAN	MED23	MED23_HUMAN Mediator of RNA polymerase II transcription subunit 23	19	5.83826	6.36499	5.51515	6.03336	6.62178	7.04598	6.08413	6.44023	6.65112	6.57369	6.18991	6.7452	6.45237	5.81199	5.84647	5.78536	5.93794	6.54803	6.53998	5.97405	1.10274	1.10139	1.00608	0.141098	0.139324	0.00874619	0.05995	0.0611009	0.0372614	0.0535418
sp|Q9NWL6|ASND1_HUMAN	ASNSD1	ASND1_HUMAN Asparagine synthetase domain-containing protein 1	1	5.61019	6.59105	5.65824	5.94894	6.67286	7.06672	6.12354	6.29357	6.70538	6.96488	5.78312	6.76863	6.08993	6.00005	6.31856	5.40434	5.95211	6.53917	6.5555	5.95322	1.09863	1.10138	1.00019	0.135708	0.139306	0.000270233	0.0758534	0.0642313	0.0803357	0.0654623
sp|Q9Y4C2|F115A_HUMAN	FAM115A	F115A_HUMAN Protein FAM115A	16	5.81846	6.36489	5.75681	6.03187	6.491	6.87881	6.35333	6.46691	6.58773	6.71888	6.44821	6.64734	6.01567	5.75877	5.80835	5.85297	5.99301	6.54751	6.60054	5.85894	1.09253	1.10137	0.977629	0.127667	0.139304	-0.0326405	0.0458046	0.0349565	0.0173982	0.0190043
sp|Q96CB9|NSUN4_HUMAN	NSUN4	NSUN4_HUMAN 5-methylcytosine rRNA methyltransferase NSUN4	3	5.85541	6.19821	5.84205	5.88425	6.63155	6.51447	5.9353	6.66431	6.44124	6.3966	6.42019	6.93214	6.43094	5.85894	6.01205	5.98238	5.94498	6.43641	6.54754	6.07108	1.08266	1.10136	1.02121	0.114584	0.139282	0.0302806	0.0285511	0.0528567	0.0392584	0.0409978
sp|Q15006|EMC2_HUMAN	EMC2	EMC2_HUMAN ER membrane protein complex subunit 2	9	6.06742	6.39688	5.8049	5.63749	6.61239	6.66971	6.24224	6.38628	6.84971	6.45045	6.53714	6.4906	6.22462	5.86446	6.00301	5.76269	5.97667	6.47765	6.58197	5.96369	1.08382	1.10128	0.997829	0.116129	0.139178	-0.00313601	0.055439	0.0307217	0.0276469	0.0335192
sp|Q8N196|SIX5_HUMAN	SIX5	SIX5_HUMAN Homeobox protein SIX5	2	6.18914	6.43302	5.5775	5.55494	6.46162	7.11657	6.40298	6.30836	6.30502	7.42927	6.46526	5.95598	6.51041	5.31762	5.87484	6.09746	5.93865	6.57238	6.53888	5.95008	1.10671	1.10107	1.00193	0.146281	0.138909	0.00277466	0.0743462	0.0560292	0.0964267	0.0835469
sp|Q9UBP6|TRMB_HUMAN	METTL1	TRMB_HUMAN tRNA (guanine-N(7)-)-methyltransferase	7	5.43182	5.76575	6.04635	6.54446	6.2177	6.30682	6.4146	6.31135	6.43266	6.42032	6.61764	6.7177	6.25062	6.30641	6.23721	5.97862	5.9471	6.31262	6.54708	6.19321	1.06146	1.10089	1.04138	0.0860532	0.138666	0.0585034	0.0791726	0.0127536	0.022178	0.0236013
sp|Q9UHB9|SRP68_HUMAN	SRP68	SRP68_HUMAN Signal recognition particle subunit SRP68	34	5.93283	6.71087	5.45125	5.7403	6.6588	7.27934	6.12509	6.36354	6.90743	6.69064	6.39787	6.24286	6.2485	5.90275	5.95333	5.39461	5.95881	6.60669	6.5597	5.8748	1.10873	1.10084	0.985901	0.148903	0.138605	-0.0204857	0.0904579	0.0754906	0.0452774	0.0603562
tr|J3KPF3|J3KPF3_HUMAN	SLC3A2	J3KPF3_HUMAN 4F2 cell-surface antigen heavy chain	1	5.41019	6.17616	7.18695	5.42853	7.05191	6.71256	6.05418	4.93682	8.38613	6.37947	6.79355	5.08277	6.61126	6.14051	5.46383	6.18517	6.05046	6.18887	6.66048	6.10019	1.02288	1.10082	1.00822	0.0326312	0.138582	0.0118105	0.138417	0.150564	0.204464	0.0777581
sp|Q9UJ68|MSRA_HUMAN	MSRA	MSRA_HUMAN Mitochondrial peptide methionine sulfoxide reductase	9	5.80368	6.18623	6.29964	6.07337	6.21761	6.75962	6.85774	6.56099	6.42328	6.60901	7.24938	6.53732	5.70533	5.92222	5.56565	5.22892	6.09073	6.59899	6.70475	5.60553	1.08345	1.10081	0.920338	0.11563	0.138568	-0.119764	0.0348883	0.0428301	0.0553422	0.0518757
sp|Q99543|DNJC2_HUMAN	DNAJC2	DNJC2_HUMAN DnaJ homolog subfamily C member 2	20	5.94045	6.56058	5.50905	5.98284	6.82804	7.07525	6.37243	6.30119	6.67054	6.64881	6.66819	6.42293	6.25797	5.82673	5.70815	5.22684	5.99823	6.64423	6.60262	5.75492	1.1077	1.10076	0.959437	0.147565	0.138501	-0.0597403	0.0719722	0.0557156	0.0182029	0.0736722
sp|Q9H939|PPIP2_HUMAN	PSTPIP2	PPIP2_HUMAN Proline-serine-threonine phosphatase-interacting protein 2	10	5.95075	6.34196	5.61456	6.08592	6.62952	6.90432	6.79446	6.41585	6.95855	6.51224	6.69333	6.24577	5.96322	5.82904	6.01085	5.04967	5.9983	6.68604	6.60247	5.71319	1.11466	1.10072	0.952469	0.156598	0.138453	-0.0702553	0.0505024	0.0317978	0.0454733	0.0785896
sp|Q9NQ48|LZTL1_HUMAN	LZTFL1	LZTL1_HUMAN Leucine zipper transcription factor-like protein 1	10	5.93605	6.03505	5.79423	6.21755	6.59704	6.42659	6.51354	6.1755	6.49497	6.47336	6.85124	6.5763	5.94082	5.80699	6.20627	5.95451	5.99572	6.42817	6.59897	5.97715	1.07213	1.10061	0.996902	0.100475	0.138307	-0.00447587	0.0296663	0.0283524	0.0263561	0.0278755
sp|Q5W0V3|F16B1_HUMAN	FAM160B1	F16B1_HUMAN Protein FAM160B1	17	5.85486	6.4967	5.66707	5.8384	6.45039	6.94134	6.37789	6.25364	6.8192	6.31052	6.52493	6.60254	6.23485	5.8105	6.12967	5.6875	5.96426	6.50582	6.5643	5.96563	1.0908	1.10061	1.00023	0.125387	0.138298	0.000331956	0.0611939	0.0463435	0.0320022	0.0433686
sp|Q92626|PXDN_HUMAN	PXDN	PXDN_HUMAN Peroxidasin homolog	1	6.50312	7.17884	5.21928	5.593	7.01519	7.5599	4.93601	6.90817	7.35387	6.46335	6.23343	6.90758	5.60175	6.17689	5.22686	5.12275	6.12356	6.60482	6.73956	5.53206	1.07859	1.10059	0.903406	0.109148	0.138283	-0.146553	0.144746	0.173896	0.0735963	0.0861461
sp|O75648|MTU1_HUMAN	TRMU	MTU1_HUMAN Mitochondrial tRNA-specific 2-thiouridylase 1	12	6.08908	6.27759	5.5158	6.24337	6.47788	6.71426	6.2447	5.98806	7.01208	6.51517	6.61393	6.41124	6.00514	5.88596	6.05854	5.94722	6.03146	6.35623	6.6381	5.97421	1.05385	1.10058	0.990509	0.0756629	0.138264	-0.0137581	0.0585956	0.0489966	0.0395735	0.0124455
sp|P17612|KAPCA_HUMAN	PRKACA	KAPCA_HUMAN cAMP-dependent protein kinase catalytic subunit alpha	2	5.78819	6.01785	5.4604	6.69552	5.66294	6.25792	6.40598	6.30061	6.13441	6.00813	7.18945	7.0396	6.42576	5.95681	6.9285	5.72794	5.99049	6.15686	6.5929	6.25975	1.02777	1.10056	1.04495	0.0395213	0.138239	0.0634316	0.0872598	0.0544286	0.0921618	0.0850028
sp|Q8IYB7|DI3L2_HUMAN	DIS3L2	DI3L2_HUMAN DIS3-like exonuclease 2	24	5.74864	6.39448	5.67488	5.9762	6.76481	6.92014	6.2594	6.33795	6.6633	6.58712	6.53392	6.40016	6.2235	5.86318	6.09654	5.55578	5.94855	6.57057	6.54612	5.93475	1.10457	1.10046	0.99768	0.143482	0.138103	-0.00335079	0.0544281	0.0489918	0.0169342	0.0494417
sp|Q9BZL6|KPCD2_HUMAN	PRKD2	KPCD2_HUMAN Serine/threonine-protein kinase D2	7	5.9046	6.50013	5.85147	5.93546	6.57483	6.7701	6.14192	6.39693	7.02133	6.47557	6.4828	6.64194	6.30475	5.7133	5.5424	5.74246	6.04791	6.47095	6.65541	5.82573	1.06995	1.10045	0.963262	0.0975386	0.13809	-0.0539996	0.0501769	0.0412763	0.0384265	0.0568711
sp|O75083|WDR1_HUMAN	WDR1	WDR1_HUMAN WD repeat-containing protein 1	76	5.78642	6.38506	5.56646	5.91579	6.68934	6.74382	6.25148	6.38224	6.71956	6.39245	6.54055	6.37613	6.48933	5.94432	6.11968	5.69737	5.91343	6.51672	6.50717	6.06267	1.10202	1.10041	1.02524	0.14015	0.138035	0.0359587	0.0584956	0.0365082	0.0245491	0.0549323
sp|Q9Y2A9|B3GN3_HUMAN	B3GNT3	B3GN3_HUMAN UDP-GlcNAc:betaGal beta-1,3-N-acetylglucosaminyltransferase 3	2	5.58179	5.68196	6.56326	6.80505	7.06933	6.79852	5.84465	7.11839	6.26687	6.51249	7.37127	6.95107	5.7996	5.2592	5.80792	4.56862	6.15802	6.70772	6.77543	5.35884	1.08927	1.10026	0.870221	0.123358	0.137846	-0.200546	0.100172	0.0883049	0.0719853	0.109359
sp|Q16774-2|KGUA_HUMAN	GUK1	KGUA_HUMAN Isoform 2 of Guanylate kinase	7	6.53211	6.68057	5.50475	5.84818	6.52436	7.04034	6.77554	6.70481	7.03346	6.6818	6.99381	6.31898	5.50411	5.25782	5.63593	4.96342	6.1414	6.76126	6.75701	5.34032	1.10093	1.10024	0.86956	0.138725	0.137817	-0.201642	0.0908863	0.031652	0.0490861	0.055451
sp|Q96GI7|FA89A_HUMAN	FAM89A	FA89A_HUMAN Protein FAM89A	1	6.50736	6.55701	5.00932	5.06013	6.028	6.95183	6.74928	6.28528	6.28392	7.16876	6.06346	5.93636	6.63394	6.56642	5.45218	6.74674	5.78346	6.5036	6.36313	6.34982	1.12452	1.10023	1.09793	0.169306	0.137804	0.134784	0.149572	0.0649403	0.0873709	0.0949684
sp|Q14C86-6|GAPD1_HUMAN	GAPVD1	GAPD1_HUMAN Isoform 6 of GTPase-activating protein and VPS9 domain-containing protein 1	35	5.83015	6.45114	5.612	5.94478	6.7523	7.36184	6.37503	6.61168	6.68715	6.761	6.49865	6.27986	5.9529	5.63577	5.80919	5.43656	5.95952	6.77521	6.55666	5.70861	1.13687	1.1002	0.957897	0.185071	0.137767	-0.0620573	0.059674	0.0621279	0.0328018	0.0390539
sp|A4D1E9|GTPBA_HUMAN	GTPBP10	GTPBA_HUMAN GTP-binding protein 10	17	6.14459	6.54959	5.332	5.68235	7.24155	7.18309	5.89971	6.21589	7.33598	6.67743	6.01756	6.05126	6.75216	5.9421	5.74263	5.23211	5.92713	6.63506	6.52056	5.91725	1.11944	1.10012	0.998333	0.162775	0.137661	-0.00240746	0.0897446	0.10239	0.0954776	0.106776
sp|Q8IYL2|TRM44_HUMAN	TRMT44	TRM44_HUMAN Probable tRNA (uracil-O(2)-)-methyltransferase	1	6.52485	6.44919	5.20953	5.67899	7.1525	6.62712	6.01004	6.01804	6.39229	6.71196	6.28776	6.85933	5.98352	5.79095	6.0773	6.22664	5.96564	6.45192	6.56283	6.0196	1.08151	1.10011	1.00905	0.113053	0.137642	0.0129913	0.106034	0.0851292	0.0407817	0.0302962
sp|P42898|MTHR_HUMAN	MTHFR	MTHR_HUMAN Methylenetetrahydrofolate reductase	5	6.05608	6.3682	5.70503	5.79607	6.52829	6.66168	6.17179	6.39421	7.13284	6.24295	6.2955	6.64652	6.124	5.95059	6.18418	5.74208	5.98135	6.43899	6.57945	6.00021	1.07651	1.1	1.00315	0.106365	0.137498	0.00454366	0.0497754	0.032449	0.0623337	0.0330899
sp|Q9H8M2|BRD9_HUMAN	BRD9	BRD9_HUMAN Bromodomain-containing protein 9	2	5.78469	6.66876	5.45436	5.9358	6.96207	7.07364	5.5943	6.56521	6.50445	6.75419	6.36618	6.60231	6.34057	5.49786	5.91352	5.98208	5.9609	6.5488	6.55678	5.93351	1.09863	1.09996	0.995404	0.135701	0.137457	-0.00664559	0.0860511	0.102722	0.0249226	0.0582397
sp|O95210|STBD1_HUMAN	STBD1	STBD1_HUMAN Starch-binding domain-containing protein 1	6	5.33512	5.87553	5.85252	6.2208	6.27666	6.74646	6.27929	6.44351	6.43554	6.23085	6.42499	6.51886	6.47345	6.36651	6.37997	6.13994	5.82099	6.43648	6.40256	6.33997	1.10574	1.09991	1.08916	0.145007	0.137384	0.12321	0.0627207	0.0343197	0.019044	0.0223311
sp|O94822-3|LTN1_HUMAN	LTN1	LTN1_HUMAN Isoform 3 of E3 ubiquitin-protein ligase listerin	1	2.4962	11.8754	2.96796	11.1873	7.01825	2.50833	2.20589	8.15746	20.4597	2.77414	2.66838	5.47461	8.58567	1.83657	4.65479	5.1294	7.13172	4.97248	7.84421	5.05161	0.697235	1.0999	0.70833	-0.520283	0.137379	-0.497507	0.713947	0.614998	1.08488	0.547993
sp|Q9GZM5|YIPF3_HUMAN	YIPF3	YIPF3_HUMAN Protein YIPF3	3	5.76993	6.23073	6.08497	5.77687	6.05621	7.6032	7.85804	6.14917	6.42333	6.63499	6.95453	6.23329	5.01633	6.23381	5.76719	5.20739	5.96563	6.91666	6.56154	5.55618	1.15942	1.09989	0.931366	0.213401	0.13736	-0.10258	0.0385237	0.136827	0.0471126	0.0994948
sp|Q5VUA4|ZN318_HUMAN	ZNF318	ZN318_HUMAN Zinc finger protein 318	4	5.18244	5.53222	6.266	6.57664	6.56604	6.28771	6.13894	6.56005	6.22568	6.0594	6.71786	6.90726	5.89117	6.40406	6.41041	6.27412	5.88933	6.38819	6.47755	6.24494	1.08471	1.09988	1.06038	0.117304	0.137346	0.0845854	0.109231	0.0330081	0.0617959	0.0390822
sp|P42356|PI4KA_HUMAN	PI4KA	PI4KA_HUMAN Phosphatidylinositol 4-kinase alpha	21	5.68549	6.37731	5.89155	5.97784	6.5392	6.79214	6.12616	6.42424	6.75329	6.52298	6.36912	6.67646	6.09525	5.98664	5.97247	5.80986	5.98305	6.47044	6.58046	5.96606	1.08146	1.09985	0.99716	0.112982	0.137308	-0.00410324	0.0484782	0.0426886	0.0258868	0.0197267
sp|Q5TA45|INT11_HUMAN	CPSF3L	INT11_HUMAN Integrator complex subunit 11	15	5.76519	6.5048	5.65497	5.88491	6.95814	7.12176	6.10159	6.50303	6.76353	6.75556	6.32378	6.34433	6.09833	5.85607	5.71773	5.64629	5.95247	6.67113	6.5468	5.8296	1.12073	1.09985	0.979359	0.164443	0.137302	-0.0300897	0.06384	0.0691315	0.0375483	0.0341693
sp|Q8WVI0|SMIM4_HUMAN	SMIM4	SMIM4_HUMAN Small integral membrane protein 4	1	5.68548	6.49943	6.162	5.45396	6.56367	6.54805	5.95858	6.62455	5.65584	6.32942	7.81002	6.38201	6.3536	5.75643	5.92	6.29698	5.95022	6.42371	6.54432	6.08175	1.07958	1.09985	1.02211	0.110465	0.137301	0.0315447	0.0789973	0.0485451	0.13848	0.0476763
sp|Q9H5Z1|DHX35_HUMAN	DHX35	DHX35_HUMAN Probable ATP-dependent RNA helicase DHX35	4	5.52744	6.20605	6.38536	6.31644	6.57004	6.57105	5.83689	6.13891	6.63172	6.42854	6.89466	6.91948	5.96023	6.05459	5.67528	5.88333	6.10882	6.27922	6.7186	5.89336	1.02789	1.09982	0.964729	0.0396916	0.137266	-0.0518045	0.0645888	0.0570573	0.0346975	0.0273826
sp|Q9HBG6-3|IF122_HUMAN	IFT122	IF122_HUMAN Isoform 3 of Intraflagellar transport protein 122 homolog	4	5.69505	6.68843	6.15877	5.65523	6.47797	6.97264	6.33897	6.45551	6.90244	6.33488	6.74363	6.63134	5.99836	5.644	5.49956	5.80322	6.04937	6.56127	6.65307	5.73628	1.08462	1.0998	0.948245	0.117191	0.137236	-0.0766682	0.0799222	0.0428165	0.0360008	0.0373513
sp|Q9Y2Z9|COQ6_HUMAN	COQ6	COQ6_HUMAN Ubiquinone biosynthesis monooxygenase COQ6	6	5.64649	6.20362	5.71411	6.42853	6.56476	7.10445	6.11842	6.31804	6.80703	6.34834	6.46311	6.76817	5.95072	5.95417	5.90197	5.70806	5.99819	6.52642	6.59666	5.87873	1.08806	1.09978	0.980084	0.121765	0.13721	-0.0290221	0.0632492	0.0653359	0.0342532	0.0197747
sp|Q9UI09|NDUAC_HUMAN	NDUFA12	NDUAC_HUMAN NADH dehydrogenase [ubiquinone] 1 alpha subcomplex subunit 12	9	5.70958	6.33984	5.59508	5.98541	6.372	6.52625	6.24259	6.44531	6.39575	6.65723	6.44568	6.48845	6.30291	6.10639	6.40086	5.98668	5.90748	6.39654	6.49678	6.19921	1.08279	1.09975	1.04938	0.114749	0.137182	0.0695421	0.056123	0.0188265	0.0174668	0.0302074
sp|P28340|DPOD1_HUMAN	POLD1	DPOD1_HUMAN DNA polymerase delta catalytic subunit	37	5.9382	6.5077	5.60975	5.67022	6.57887	6.93577	6.16634	6.427	6.79563	6.5608	6.39182	6.3439	6.17853	6.04462	5.96247	5.88836	5.93147	6.52699	6.52304	6.01849	1.1004	1.09973	1.01467	0.13803	0.137155	0.0210137	0.0690914	0.0492389	0.0312979	0.0206566
sp|Q6YHU6|THADA_HUMAN	THADA	THADA_HUMAN Thyroid adenoma-associated protein	23	6.02553	6.35896	5.61839	6.09014	6.67664	6.92903	6.40849	6.46222	6.7383	6.57224	6.52133	6.66386	5.7736	5.76849	5.83649	5.5563	6.02325	6.61909	6.62393	5.73372	1.09892	1.09973	0.95193	0.136091	0.137145	-0.0710719	0.0508198	0.0357873	0.0145519	0.0213221
sp|Q16891|IMMT_HUMAN	IMMT	IMMT_HUMAN Mitochondrial inner membrane protein	43	5.82164	6.27265	5.47602	5.92101	6.62218	6.72413	6.1611	6.37167	6.61342	6.63605	6.26036	6.32068	6.68116	6.08718	6.10764	5.9231	5.87283	6.46977	6.45763	6.19977	1.10164	1.09958	1.05567	0.139659	0.136948	0.0781588	0.0558075	0.0391865	0.0301571	0.0534511
sp|Q969Z0|TBRG4_HUMAN	TBRG4	TBRG4_HUMAN Protein TBRG4	26	5.91545	6.62663	5.57911	5.62491	6.70851	7.04981	6.35729	6.51187	6.67114	6.63249	6.38907	6.41518	6.1073	5.89805	5.93733	5.57587	5.93652	6.65687	6.52697	5.87964	1.12134	1.09946	0.990417	0.165225	0.136795	-0.0138915	0.0814578	0.0448857	0.0222784	0.0377473
sp|Q15738|NSDHL_HUMAN	NSDHL	NSDHL_HUMAN Sterol-4-alpha-carboxylate 3-dehydrogenase, decarboxylating	22	5.87009	6.27555	5.64261	5.91254	6.65002	6.87352	6.22129	6.28935	6.94867	6.49726	6.36548	6.24533	6.53518	5.84265	6.16348	5.66697	5.9252	6.50854	6.51419	6.05207	1.09845	1.0994	1.02141	0.135472	0.136721	0.0305654	0.0442037	0.0472552	0.0471873	0.0631329
sp|Q96P48|ARAP1_HUMAN	ARAP1	ARAP1_HUMAN Arf-GAP with Rho-GAP domain, ANK repeat and PH domain-containing protein 1	28	5.80219	6.49439	5.72434	5.99073	7.00187	6.8198	6.30469	6.21564	6.76058	6.30996	6.52433	6.80143	6.09622	5.75592	5.80752	5.59038	6.00291	6.5855	6.59908	5.81251	1.09705	1.09931	0.968282	0.13363	0.136601	-0.0465013	0.0576742	0.0584115	0.0345784	0.0362327
sp|P78395|PRAME_HUMAN	PRAME	PRAME_HUMAN Melanoma antigen preferentially expressed in tumors	2	5.90023	6.263	5.33481	5.95304	6.43343	6.81203	6.32483	6.68339	6.63477	6.21179	6.26328	6.66798	6.53272	5.93784	5.82998	6.21689	5.86277	6.56342	6.44445	6.12936	1.11951	1.09922	1.04547	0.162865	0.136476	0.0641534	0.0659488	0.0340712	0.037278	0.0513051
sp|Q13506|NAB1_HUMAN	NAB1	NAB1_HUMAN NGFI-A-binding protein 1	3	5.97716	6.36438	5.97981	5.71224	6.4607	7.16445	6.72214	6.57696	7.13091	6.76103	6.41358	6.11168	5.77758	5.72319	5.87991	5.24427	6.0084	6.73106	6.6043	5.65624	1.12028	1.09918	0.941389	0.163854	0.136425	-0.0871376	0.0446822	0.0457705	0.0666308	0.0498963
sp|P33993|MCM7_HUMAN	MCM7	MCM7_HUMAN DNA replication licensing factor MCM7	52	5.87886	6.53088	5.58962	5.86499	6.73458	6.91208	6.01023	6.28833	6.91831	6.63912	6.29747	6.37612	6.36326	5.9774	5.91919	5.69955	5.96609	6.4863	6.55776	5.98985	1.0872	1.09917	1.00398	0.120612	0.136417	0.00573474	0.0669441	0.0634894	0.0428931	0.0461111
sp|Q8NB16|MLKL_HUMAN	MLKL	MLKL_HUMAN Mixed lineage kinase domain-like protein	6	5.85852	5.86787	5.72732	6.45682	6.64251	6.49748	6.21424	6.51687	6.40375	6.71554	6.58188	6.5771	5.94002	5.79642	6.26156	5.94211	5.97763	6.46778	6.56957	5.98503	1.082	1.09902	1.00124	0.113695	0.136224	0.00178367	0.0545097	0.0279595	0.019456	0.0328424
sp|P0DJD1|RGPD2_HUMAN	RGPD2	RGPD2_HUMAN RANBP2-like and GRIP domain-containing protein 2	1	5.63205	5.13353	7.36575	6.93214	5.39945	5.50232	5.97049	5.79436	6.83347	4.5534	8.23541	7.91964	5.84259	6.16775	6.39801	6.31964	6.26587	5.66665	6.88548	6.182	0.904369	1.09889	0.986615	-0.145017	0.136043	-0.0194412	0.168335	0.0463583	0.242052	0.0397337
sp|Q96DM3|MIC1_HUMAN	C18orf8	MIC1_HUMAN Uncharacterized protein C18orf8	6	6.02276	6.33327	5.91362	5.95656	6.77362	6.58398	6.25876	6.06275	6.82204	6.44919	6.4581	6.89141	6.05111	6.00349	5.76074	5.6586	6.05655	6.41978	6.65518	5.86848	1.05997	1.09884	0.968948	0.0840265	0.135982	-0.0455087	0.0313482	0.0497129	0.0352302	0.0322173
sp|Q9Y5W8|SNX13_HUMAN	SNX13	SNX13_HUMAN Sorting nexin-13	1	4.69381	5.44881	6.07847	7.58537	6.28242	6.20339	5.13387	6.87812	6.49633	5.61163	7.49993	6.55136	6.757	6.39487	6.63975	5.74488	5.95162	6.12445	6.53981	6.38412	1.02904	1.09883	1.07267	0.0412991	0.135968	0.101208	0.206243	0.118512	0.117961	0.0708132
sp|P09525|ANXA4_HUMAN	ANXA4	ANXA4_HUMAN Annexin A4	48	5.89372	6.21812	5.76018	6.05593	6.55764	6.53515	6.24725	6.32663	6.84713	6.44148	6.4179	6.585	6.24526	5.86985	6.26704	5.73173	5.98199	6.41667	6.57288	6.02847	1.07266	1.09878	1.00777	0.101199	0.1359	0.011167	0.0331842	0.0239278	0.0299997	0.0446263
sp|Q86VK4-5|ZN410_HUMAN	ZNF410	ZN410_HUMAN Isoform 5 of Zinc finger protein 410	1	5.5059	6.38148	5.16126	6.46709	4.79197	7.64033	6.08016	7.00478	6.66099	6.37956	5.57568	7.22215	6.26752	6.8126	5.46428	6.58425	5.87893	6.37931	6.4596	6.28216	1.08511	1.09877	1.06859	0.117846	0.13589	0.095707	0.109916	0.193908	0.106122	0.0938027
sp|Q14CZ7|FAKD3_HUMAN	FASTKD3	FAKD3_HUMAN FAST kinase domain-containing protein 3	2	6.30291	6.11577	5.59094	6.16988	6.25999	6.48061	6.65478	6.37235	6.62336	6.60862	6.86589	6.46925	6.1071	5.69074	5.89979	5.78802	6.04487	6.44193	6.64178	5.87141	1.06568	1.09875	0.971304	0.091781	0.135857	-0.0420049	0.0517251	0.0260903	0.0248056	0.0304594
sp|Q8TBP6|S2540_HUMAN	SLC25A40	S2540_HUMAN Solute carrier family 25 member 40	2	5.81969	6.49252	5.55283	5.64746	7.05147	7.22738	6.15402	6.07906	6.55264	6.58501	6.55449	6.14194	5.9453	6.0941	6.09009	6.01202	5.87812	6.62798	6.45852	6.03538	1.12757	1.09874	1.02675	0.173214	0.135848	0.038088	0.0721714	0.0898765	0.032759	0.0117555
sp|A4D1U4|LCHN_HUMAN	LCHN	LCHN_HUMAN Protein LCHN	2	4.93841	5.91585	6.64302	6.64715	6.44139	6.59271	5.85042	6.32934	6.73562	6.97689	6.80267	6.0131	5.85911	5.79316	6.10494	6.35622	6.03611	6.30347	6.63207	6.02836	1.04429	1.09873	0.998716	0.0625266	0.135841	-0.00185352	0.133947	0.0508817	0.0640812	0.0425429
sp|Q9NRD1|FBX6_HUMAN	FBXO6	FBX6_HUMAN F-box only protein 6	9	5.7849	6.27377	5.85793	6.03251	6.34255	6.92325	6.31076	6.46439	6.56931	6.6829	6.40638	6.65373	6.16773	6.01886	5.72799	5.78304	5.98728	6.51024	6.57808	5.92441	1.08735	1.09868	0.989499	0.12081	0.135766	-0.0152299	0.0363133	0.0434994	0.0188791	0.0346872
sp|O43734|CIKS_HUMAN	TRAF3IP2	CIKS_HUMAN Adapter protein CIKS	1	6.15088	5.80642	5.93804	5.9384	6.22249	5.85695	5.78261	7.10357	6.46177	6.46893	7.21227	6.04182	5.74174	7.07534	5.84857	6.35018	5.95843	6.24141	6.5462	6.25396	1.04749	1.09864	1.0496	0.0669374	0.135724	0.069836	0.023924	0.0971057	0.0743755	0.0972904
sp|Q8N3Z3|GTPB8_HUMAN	GTPBP8	GTPB8_HUMAN GTP-binding protein 8	2	5.71998	6.46594	6.23171	5.25047	6.89001	6.56953	6.24786	6.03818	7.01615	6.41132	6.36776	6.20537	7.12126	6.0945	5.79185	5.57811	5.91702	6.4364	6.50015	6.14643	1.08778	1.09855	1.03877	0.121381	0.135601	0.0548767	0.0917125	0.0579673	0.0546498	0.11121
sp|Q96AX1|VP33A_HUMAN	VPS33A	VP33A_HUMAN Vacuolar protein sorting-associated protein 33A	10	5.89815	6.70387	5.60721	5.78398	6.65952	7.11701	6.07996	6.29942	6.77578	6.90583	6.21179	6.46298	6.08667	5.94003	5.80507	5.66273	5.9983	6.53898	6.5891	5.87362	1.09014	1.09849	0.979215	0.124511	0.135526	-0.0303031	0.0809174	0.0693393	0.0474647	0.0309239
sp|O14656|TOR1A_HUMAN	TOR1A	TOR1A_HUMAN Torsin-1A	7	5.96872	6.05646	5.71097	5.81904	6.66324	6.44652	6.19902	6.62177	6.71521	6.66361	6.14054	6.35547	6.03563	6.52115	6.10801	5.97465	5.8888	6.48264	6.46871	6.15986	1.10084	1.09848	1.04603	0.138608	0.135504	0.0649245	0.0261218	0.0325674	0.0417935	0.0400904
sp|P14373|TRI27_HUMAN	TRIM27	TRI27_HUMAN Zinc finger protein RFP	6	5.83548	6.13097	5.76855	6.04538	5.84751	6.42564	6.44344	6.46432	6.48171	6.59433	6.5807	6.46509	6.47668	5.83039	6.28986	6.31996	5.9451	6.29523	6.53046	6.22922	1.05889	1.09846	1.04779	0.0825587	0.135484	0.0673522	0.0287742	0.0474799	0.0101779	0.0446631
sp|Q9H993|CF211_HUMAN	C6orf211	CF211_HUMAN UPF0364 protein C6orf211	16	6.0418	6.29455	5.52091	5.76801	6.92474	7.1294	6.14132	6.38519	7.00685	6.35785	6.16588	6.42038	6.26506	5.9801	6.06002	5.53794	5.90632	6.64516	6.48774	5.96078	1.12509	1.09844	1.00922	0.170046	0.135457	0.0132422	0.0567251	0.0691847	0.055893	0.0513989
sp|O00505|IMA4_HUMAN	KPNA3	IMA4_HUMAN Importin subunit alpha-4	10	6.0224	6.4163	5.71757	5.68778	6.76796	6.66752	6.27983	6.23566	7.01732	6.30308	6.57534	6.29339	6.29793	5.86356	6.18643	5.66792	5.96101	6.48774	6.54728	6.00396	1.08836	1.09835	1.0072	0.122159	0.135339	0.010357	0.056887	0.0415136	0.0518564	0.0483061
sp|O95197-5|RTN3_HUMAN	RTN3	RTN3_HUMAN Isoform 5 of Reticulon-3	2	6.29505	5.13205	6.81946	6.7046	6.24616	5.16179	7.48129	6.79984	6.73619	5.96178	6.62314	8.08203	3.65546	6.71162	4.86108	6.72846	6.23779	6.42227	6.85079	5.48916	1.02957	1.09827	0.879984	0.0420483	0.135234	-0.184451	0.123562	0.152666	0.129774	0.274018
sp|Q96JJ3|ELMO2_HUMAN	ELMO2	ELMO2_HUMAN Engulfment and cell motility protein 2	8	5.8835	6.27379	5.91481	6.09951	6.48568	6.71332	6.20989	6.26564	6.5592	6.6136	6.55045	6.82336	6.23447	6.01811	5.69548	5.65921	6.0429	6.41863	6.63665	5.90182	1.06218	1.09826	0.976653	0.0870243	0.135214	-0.0340824	0.0299597	0.0357898	0.0192218	0.0464663
sp|P13010|XRCC5_HUMAN	XRCC5	XRCC5_HUMAN X-ray repair cross-complementing protein 5	119	5.877	6.55385	5.45587	5.85587	6.74773	6.95151	6.15674	6.38989	6.73726	6.85525	6.26958	6.21072	6.35321	5.98405	6.02555	5.57593	5.93565	6.56147	6.5182	5.98468	1.10543	1.09815	1.00826	0.144613	0.135069	0.0118699	0.0767227	0.0542463	0.0499445	0.0532397
sp|Q9BT17|MTG1_HUMAN	MTG1	MTG1_HUMAN Mitochondrial ribosome-associated GTPase 1	5	5.72807	6.08403	6.12398	5.87493	6.08101	6.64014	6.31662	6.88322	6.79297	6.34921	6.35586	6.6493	6.59897	5.73884	5.89068	5.89217	5.95275	6.48025	6.53683	6.03017	1.08861	1.09812	1.013	0.122492	0.135035	0.0186406	0.031141	0.0544944	0.0337721	0.0640058
sp|Q9NY33|DPP3_HUMAN	DPP3	DPP3_HUMAN Dipeptidyl peptidase 3	40	5.82346	6.29271	5.55891	6.04688	6.58556	6.52786	6.21111	6.46254	6.69725	6.36212	6.5155	6.47318	6.50692	5.79951	6.15385	5.98263	5.93049	6.44677	6.51201	6.11073	1.08705	1.09806	1.03039	0.120425	0.134952	0.0431928	0.0528113	0.025586	0.0214073	0.0492839
sp|Q14149|MORC3_HUMAN	MORC3	MORC3_HUMAN MORC family CW-type zinc finger protein 3	27	5.77078	6.16705	5.85828	6.27668	6.65699	6.67605	6.19371	6.23572	6.79729	6.45494	6.70537	6.47337	6.12995	5.88708	6.02332	5.69342	6.0182	6.44062	6.60774	5.93344	1.07019	1.09796	0.985917	0.0978676	0.134826	-0.0204621	0.0402191	0.0406062	0.0257517	0.0317477
sp|Q86UA1|PRP39_HUMAN	PRPF39	PRP39_HUMAN Pre-mRNA-processing factor 39	15	6.01039	6.43262	5.66199	6.06335	6.45172	6.50606	6.3908	6.20192	6.74097	6.43932	6.80521	6.55027	6.2659	5.85938	5.93601	5.68412	6.04209	6.38762	6.63394	5.93635	1.05719	1.09796	0.9825	0.0802325	0.134819	-0.0254703	0.0522018	0.0207359	0.0254726	0.0410497
sp|P55795|HNRH2_HUMAN	HNRNPH2	HNRH2_HUMAN Heterogeneous nuclear ribonucleoprotein H2	11	6.12716	6.37918	5.43047	5.85114	6.84852	6.91514	6.26089	6.53206	7.1214	6.74138	6.15182	6.10299	5.86545	6.27514	5.79042	5.60685	5.94699	6.63915	6.5294	5.88447	1.11639	1.09793	0.989487	0.15884	0.134791	-0.0152478	0.0683196	0.0455661	0.0750187	0.047956
sp|Q96I59|SYNM_HUMAN	NARS2	SYNM_HUMAN Probable asparagine--tRNA ligase, mitochondrial	26	5.78303	6.45912	5.52042	6.15403	6.6299	6.73217	6.66736	6.61169	6.70145	6.26761	6.81253	6.47663	5.98396	5.5796	6.2697	5.35082	5.97915	6.66028	6.56456	5.79602	1.11392	1.09791	0.969372	0.155642	0.134757	-0.0448778	0.0689479	0.00799306	0.0369115	0.0707687
sp|Q9Y230|RUVB2_HUMAN	RUVBL2	RUVB2_HUMAN RuvB-like 2	89	5.93274	6.34055	5.82462	5.90167	6.63684	6.74067	6.57077	6.35901	6.67718	6.59934	6.62463	6.44807	6.0282	5.82157	6.0047	5.48944	5.99989	6.57682	6.58731	5.83598	1.09616	1.0979	0.97268	0.132453	0.134751	-0.0399629	0.0386018	0.0245057	0.014926	0.0426331
sp|Q6P1M3|L2GL2_HUMAN	LLGL2	L2GL2_HUMAN Lethal(2) giant larvae protein homolog 2	16	5.63839	6.46264	5.96225	6.14264	6.37846	6.81597	6.08863	6.37579	6.41449	6.56758	6.73852	6.85504	6.26142	5.78207	5.69798	5.81813	6.05148	6.41471	6.64391	5.8899	1.06002	1.0979	0.973299	0.0840966	0.134744	-0.0390449	0.0569224	0.0467819	0.0290803	0.0429114
sp|Q96T66|NMNA3_HUMAN	NMNAT3	NMNA3_HUMAN Nicotinamide mononucleotide adenylyltransferase 3	1	5.64686	5.40804	5.78352	7.32926	6.73059	6.92305	5.79531	5.26457	7.23665	6.94809	5.38926	6.95922	6.74182	6.07735	5.1513	6.61513	6.04192	6.17838	6.63331	6.1464	1.02259	1.09788	1.01729	0.0322215	0.134721	0.0247346	0.144348	0.126801	0.126639	0.117669
sp|P41162|ETV3_HUMAN	ETV3	ETV3_HUMAN ETS translocation variant 3	2	5.79547	6.12698	6.30314	5.5206	6.06068	7.67033	4.52809	6.2351	6.51681	6.33266	7.19763	6.02327	5.91771	6.71412	6.51962	6.53777	5.93655	6.12355	6.51759	6.4223	1.0315	1.09788	1.08182	0.0447441	0.134715	0.113467	0.0586407	0.209861	0.0762541	0.0541311
sp|A0AVT1|UBA6_HUMAN	UBA6	UBA6_HUMAN Ubiquitin-like modifier-activating enzyme 6	47	5.93945	6.47634	5.5359	5.98821	6.70732	6.63791	6.03471	6.37112	7.02292	6.41809	6.48845	6.35151	6.48514	5.90516	6.05767	5.58011	5.98497	6.43777	6.57024	6.00702	1.07565	1.09779	1.00368	0.105215	0.134601	0.00530425	0.0643651	0.0474223	0.0467138	0.0625686
sp|Q7Z569|BRAP_HUMAN	BRAP	BRAP_HUMAN BRCA1-associated protein	13	5.69817	6.14404	5.94699	6.23602	6.39453	6.38129	6.06912	6.24157	6.67981	6.62268	6.46559	6.60497	6.07743	6.09997	6.2073	6.13052	6.00631	6.27163	6.59326	6.1288	1.04417	1.09772	1.0204	0.0623621	0.134515	0.0291281	0.0396569	0.0241892	0.0137881	0.00924688
sp|P52294|IMA5_HUMAN	KPNA1	IMA5_HUMAN Importin subunit alpha-5	17	5.93861	6.26494	5.71374	6.14833	6.82753	7.03476	6.24753	6.46182	6.86586	6.51217	6.38709	6.65132	6.13277	5.74939	5.74842	5.31571	6.01641	6.64291	6.60411	5.73657	1.10413	1.09768	0.953488	0.142914	0.134462	-0.0687127	0.0403536	0.0533467	0.031068	0.0581998
sp|Q5JTZ9|SYAM_HUMAN	AARS2	SYAM_HUMAN Alanine--tRNA ligase, mitochondrial	12	5.83218	6.5078	5.70225	6.10717	6.64812	6.85379	6.11068	6.35763	6.79702	6.6696	6.41774	6.624	6.14976	5.6991	6.04057	5.48259	6.03735	6.49255	6.62709	5.843	1.0754	1.09768	0.96781	0.104871	0.13446	-0.0472049	0.0589955	0.0502032	0.0237823	0.0526335
sp|P22314|UBA1_HUMAN	UBA1	UBA1_HUMAN Ubiquitin-like modifier-activating enzyme 1	137	5.77205	6.27913	5.62439	6.11305	6.68634	6.63371	6.42306	6.53338	6.74872	6.3883	6.58064	6.39437	6.33098	5.73178	6.14591	5.61418	5.94716	6.56912	6.52801	5.95571	1.10458	1.09767	1.00144	0.143501	0.134443	0.00207444	0.0506836	0.0176923	0.0263642	0.0568398
sp|Q9P2P6|STAR9_HUMAN	STARD9	STAR9_HUMAN StAR-related lipid transfer protein 9	5	5.97813	6.40414	5.57917	6.08198	6.63706	6.3497	5.88245	5.9214	6.65366	6.23337	6.57884	6.92504	6.43257	6.1958	6.21527	5.93144	6.01085	6.19765	6.59773	6.19377	1.03108	1.09764	1.03043	0.0441516	0.134399	0.0432476	0.0565933	0.058315	0.0431701	0.0331285
sp|Q92616|GCN1L_HUMAN	GCN1L1	GCN1L_HUMAN Translational activator GCN1	150	5.80907	6.48189	5.65933	5.94668	6.77525	6.95766	6.16262	6.47913	6.69116	6.57075	6.45314	6.51465	6.22791	5.76696	5.8893	5.61449	5.97424	6.59366	6.55743	5.87466	1.10368	1.09762	0.983332	0.142325	0.134374	-0.0242492	0.0599571	0.0528557	0.0154438	0.0444199
sp|Q9BXJ9|NAA15_HUMAN	NAA15	NAA15_HUMAN N-alpha-acetyltransferase 15, NatA auxiliary subunit	83	5.83272	6.36759	5.70482	5.93626	6.698	6.85519	6.31805	6.55537	6.751	6.46589	6.46527	6.48537	6.08777	5.83431	6.07166	5.57075	5.96035	6.60665	6.54188	5.89112	1.10843	1.09757	0.988386	0.148523	0.134309	-0.0168539	0.0482394	0.03452	0.0213583	0.0412466
sp|Q9UHV7|MED13_HUMAN	MED13	MED13_HUMAN Mediator of RNA polymerase II transcription subunit 13	11	5.88133	6.23565	5.95411	6.0433	6.18421	6.3079	6.06446	6.23314	7.03512	6.45542	6.36499	6.61155	6.31195	6.28276	6.01576	6.01835	6.0286	6.19743	6.61677	6.1572	1.028	1.09756	1.02133	0.0398471	0.134305	0.0304532	0.0253964	0.0164907	0.0448727	0.026355
sp|Q13617-2|CUL2_HUMAN	CUL2	CUL2_HUMAN Isoform 2 of Cullin-2	34	5.85623	6.59593	5.63851	5.82333	6.78411	7.01111	6.28501	6.47503	6.76693	6.55349	6.38564	6.5405	6.01413	5.79374	5.95458	5.52175	5.9785	6.63882	6.56164	5.82105	1.11045	1.09754	0.973664	0.151142	0.134273	-0.0385041	0.0706911	0.0485545	0.0238761	0.0378246
sp|Q9Y2V7|COG6_HUMAN	COG6	COG6_HUMAN Conserved oligomeric Golgi complex subunit 6	14	5.65665	6.38243	5.8067	6.17641	6.62022	7.05327	6.2808	6.64833	6.85584	6.63939	6.51219	6.35642	6.15402	5.53232	5.7422	5.58281	6.00555	6.65066	6.59096	5.75284	1.10742	1.09748	0.957921	0.147201	0.134193	-0.0620221	0.0554352	0.0475344	0.0320324	0.0490219
sp|O15111|IKKA_HUMAN	CHUK	IKKA_HUMAN Inhibitor of nuclear factor kappa-B kinase subunit alpha	26	6.07033	6.60581	5.60598	5.91676	6.60016	6.99117	6.00404	6.34315	6.89194	6.51601	6.44926	6.69928	6.14858	5.81393	5.72522	5.61837	6.04972	6.48463	6.63912	5.82653	1.07189	1.09743	0.963107	0.100156	0.134124	-0.0542327	0.0690989	0.0642594	0.0299659	0.0393213
sp|O60658|PDE8A_HUMAN	PDE8A	PDE8A_HUMAN High affinity cAMP-specific and IBMX-insensitive 3',5'-cyclic phosphodiesterase 8A	5	5.82392	6.00128	6.00418	6.43836	6.15118	6.27684	6.36701	5.90435	6.56589	6.12781	6.66176	7.27652	6.22683	5.86248	6.17082	6.14077	6.06693	6.17485	6.65799	6.10023	1.01779	1.09742	1.00549	0.0254351	0.13412	0.0078946	0.0431146	0.0325319	0.0710942	0.0266317
sp|Q9C0D3|ZY11B_HUMAN	ZYG11B	ZY11B_HUMAN Protein zyg-11 homolog B	10	6.17584	6.39386	5.59837	5.82596	6.60355	6.97323	6.12824	6.34866	6.56273	6.55135	6.51016	6.70695	6.37669	5.78495	6.10486	5.35461	5.99851	6.51342	6.5828	5.90528	1.08584	1.09741	0.984458	0.118812	0.134097	-0.0225987	0.0591468	0.0557135	0.013033	0.0744439
sp|Q92597|NDRG1_HUMAN	NDRG1	NDRG1_HUMAN Protein NDRG1	15	5.65697	6.44207	5.74271	6.18987	6.68266	6.83074	6.53499	6.11935	6.73678	6.45635	6.58328	6.5942	6.06498	5.59137	6.01075	5.76294	6.00791	6.54194	6.59265	5.85751	1.08889	1.09733	0.974967	0.122855	0.133997	-0.0365745	0.0619141	0.0468525	0.0173922	0.0377007
sp|Q96AC1-3|FERM2_HUMAN	FERMT2	FERM2_HUMAN Isoform 3 of Fermitin family homolog 2	26	5.98774	6.0606	5.9077	6.0607	6.41499	6.62433	6.57029	6.22349	6.68945	6.33483	6.60538	6.72393	6.0389	5.95107	6.06018	5.74641	6.00419	6.45828	6.5884	5.94914	1.07563	1.0973	0.990832	0.10518	0.133959	-0.0132873	0.0121465	0.0278596	0.0267477	0.0240651
sp|Q5VYK3|ECM29_HUMAN	ECM29	ECM29_HUMAN Proteasome-associated protein ECM29 homolog	60	5.9261	6.43455	5.65549	5.97388	6.55296	6.82675	6.29335	6.37301	6.74915	6.57601	6.4358	6.56293	6.09375	5.88927	6.02569	5.63131	5.99751	6.51152	6.58097	5.91	1.0857	1.09729	0.985411	0.118631	0.133938	-0.0212031	0.0539118	0.0363282	0.0195599	0.0345727
sp|Q15418-2|KS6A1_HUMAN	RPS6KA1	KS6A1_HUMAN Isoform 2 of Ribosomal protein S6 kinase alpha-1	36	5.97446	6.50178	5.52029	5.84459	6.76847	6.9006	6.1243	6.34243	6.85668	6.48645	6.31348	6.50388	6.39162	5.90975	5.98119	5.58002	5.96028	6.53395	6.54012	5.96564	1.09625	1.09728	1.0009	0.132575	0.133938	0.00129802	0.0685221	0.0554588	0.0348414	0.0558917
sp|P07355-2|ANXA2_HUMAN	ANXA2	ANXA2_HUMAN Isoform 2 of Annexin A2	165	5.75065	6.35845	5.7609	6.08931	6.5872	6.88191	6.39872	6.46037	6.41403	6.82141	6.67003	6.38454	5.98668	5.93447	5.94191	5.55941	5.98983	6.58205	6.5725	5.85562	1.09887	1.09728	0.977594	0.136023	0.133928	-0.0326931	0.0487113	0.0326273	0.0319042	0.0339526
sp|Q13151|ROA0_HUMAN	HNRNPA0	ROA0_HUMAN Heterogeneous nuclear ribonucleoprotein A0	14	5.99916	6.4492	5.71989	5.89999	6.25719	6.75107	6.27139	6.07559	6.64192	6.76415	6.45781	6.54446	6.21495	6.0421	6.01593	5.89521	6.01706	6.33881	6.60209	6.04205	1.05347	1.09723	1.00415	0.0751533	0.133863	0.00597878	0.0515899	0.0455819	0.0199393	0.021819
sp|P40818|UBP8_HUMAN	USP8	UBP8_HUMAN Ubiquitin carboxyl-terminal hydrolase 8	24	5.82863	6.26024	5.82334	6.13249	6.44391	6.72911	6.21311	6.36448	7.00844	6.38321	6.48272	6.50627	6.08296	6.06523	6.02249	5.65339	6.01118	6.43765	6.59516	5.95602	1.07095	1.09715	0.990824	0.0988877	0.133761	-0.013299	0.0366181	0.0336474	0.0425516	0.0341406
sp|Q03426|KIME_HUMAN	MVK	KIME_HUMAN Mevalonate kinase	18	5.76864	6.32358	5.8502	6.12975	6.87282	6.71094	6.26325	6.45645	6.87393	6.47842	6.56806	6.48922	6.08623	5.71672	5.92499	5.48681	6.01804	6.57587	6.60241	5.80369	1.09269	1.0971	0.964381	0.127886	0.133698	-0.0523245	0.0424951	0.0410325	0.0280765	0.0447681
sp|Q13488|VPP3_HUMAN	TCIRG1	VPP3_HUMAN V-type proton ATPase 116 kDa subunit a isoform 3	2	6.67173	5.87265	6.51824	5.37672	6.05553	6.35363	7.26821	5.66111	6.90296	5.8848	6.21406	7.81043	5.21946	6.81388	6.27003	5.10655	6.10983	6.33462	6.70306	5.85248	1.03679	1.09709	0.957879	0.0521247	0.133687	-0.0620853	0.098031	0.107974	0.127024	0.141444
sp|Q7Z7E8|UB2Q1_HUMAN	UBE2Q1	UB2Q1_HUMAN Ubiquitin-conjugating enzyme E2 Q1	8	5.69881	6.10915	6.12314	5.96263	6.40363	6.48198	6.42281	6.31803	6.58591	6.34775	6.46242	6.81336	6.00714	6.01114	5.96621	6.28587	5.97343	6.40661	6.55236	6.06759	1.07252	1.09692	1.01576	0.101002	0.133454	0.0225634	0.0329707	0.0105858	0.0304216	0.0242155
sp|Q9HAD4|WDR41_HUMAN	WDR41	WDR41_HUMAN WD repeat-containing protein 41	6	5.6664	6.18224	6.10044	6.33845	6.10527	6.96351	6.36743	6.16124	6.73631	6.66186	6.47776	6.76447	6.01332	5.9171	5.64372	5.90047	6.07188	6.39936	6.6601	5.86865	1.05393	1.09688	0.966529	0.0757843	0.1334	-0.0491146	0.0473971	0.0613545	0.0193747	0.0269211
sp|Q86SK9|SCD5_HUMAN	SCD5	SCD5_HUMAN Stearoyl-CoA desaturase 5	3	5.88406	6.40228	5.68163	5.90696	6.67049	6.98248	6.47616	6.41791	6.81704	6.7338	6.48652	6.15042	5.92219	5.80004	6.00123	5.6668	5.96873	6.63676	6.54695	5.84756	1.11192	1.09687	0.9797	0.153055	0.133397	-0.0295886	0.0513099	0.0383507	0.0457166	0.0250005
sp|P08559-4|ODPA_HUMAN	PDHA1	ODPA_HUMAN Isoform 4 of Pyruvate dehydrogenase E1 component subunit alpha, somatic form, mitochondrial	31	5.85027	6.39947	5.63827	6.0493	6.8368	6.80949	6.23431	6.27059	6.68989	6.58411	6.51953	6.4608	6.13994	5.82072	6.11453	5.58198	5.98433	6.5378	6.56358	5.91429	1.09249	1.0968	0.988297	0.127616	0.133294	-0.0169835	0.0540867	0.0504776	0.0149484	0.0447561
sp|Q92543|SNX19_HUMAN	SNX19	SNX19_HUMAN Sorting nexin-19	2	5.60655	5.83793	6.18907	6.1553	6.14404	6.85817	6.75704	6.28434	6.11618	6.70977	6.1642	7.09995	5.93898	5.55967	6.52884	6.04997	5.94721	6.5109	6.52252	6.01937	1.09478	1.09674	1.01213	0.130643	0.133217	0.0173977	0.0465362	0.0537266	0.0720196	0.0663332
sp|Q9UNE7|CHIP_HUMAN	STUB1	CHIP_HUMAN E3 ubiquitin-protein ligase CHIP	24	5.89029	6.69956	5.52571	5.77068	6.79279	6.94889	6.30919	6.38657	6.91491	6.76393	6.2685	6.24837	6.29261	5.94329	5.97865	5.26606	5.97156	6.60936	6.54893	5.87015	1.10681	1.09669	0.983018	0.146403	0.133151	-0.0247099	0.085154	0.0469328	0.052092	0.0736351
sp|O75943|RAD17_HUMAN	RAD17	RAD17_HUMAN Cell cycle checkpoint protein RAD17	2	6.02303	5.7957	6.03254	6.0985	6.32124	6.66706	6.52708	6.65293	6.6973	6.55456	6.15	6.86352	6.3891	5.49504	5.95148	5.78094	5.98744	6.54208	6.56635	5.90414	1.09263	1.09669	0.986087	0.127809	0.133151	-0.020213	0.022073	0.0244735	0.0464381	0.0633711
sp|P62333|PRS10_HUMAN	PSMC6	PRS10_HUMAN 26S protease regulatory subunit 10B	43	5.96414	6.50736	5.64358	5.94439	6.78715	6.84622	6.00714	6.14716	6.90225	6.57273	6.48407	6.42658	6.43232	5.8726	5.95591	5.5064	6.01487	6.44692	6.59641	5.94181	1.07183	1.09668	0.987853	0.100077	0.133148	-0.0176311	0.0597857	0.0669242	0.0322255	0.0640989
sp|Q9Y6X4|F169A_HUMAN	FAM169A	F169A_HUMAN Soluble lamin-associated protein of 75 kDa	5	5.66784	6.69309	5.68051	5.79055	6.60491	6.63258	6.30987	6.66567	6.51974	6.57934	6.39074	6.64579	5.9404	5.94447	6.00874	5.92576	5.958	6.55326	6.5339	5.95484	1.09991	1.09666	0.99947	0.137385	0.133117	-0.000764168	0.0827711	0.0250484	0.0165969	0.00618303
sp|Q13576|IQGA2_HUMAN	IQGAP2	IQGA2_HUMAN Ras GTPase-activating-like protein IQGAP2	4	5.81378	6.0701	5.91401	6.26952	6.2437	6.5762	5.97415	6.2472	6.69879	7.2077	6.12325	6.36365	6.42627	6.1321	5.37514	6.56445	6.01685	6.26031	6.59835	6.12449	1.04046	1.09664	1.01789	0.0572257	0.133096	0.0255807	0.0330303	0.0393572	0.0712031	0.0867183
sp|Q13546|RIPK1_HUMAN	RIPK1	RIPK1_HUMAN Receptor-interacting serine/threonine-protein kinase 1	20	5.75441	6.23731	5.96058	5.99803	6.63278	6.74716	6.26973	6.47971	6.77033	6.35553	6.47999	6.6573	6.38566	5.81908	5.98811	5.46429	5.98758	6.53235	6.56579	5.91428	1.09098	1.09657	0.987758	0.125627	0.132994	-0.0177699	0.0330627	0.0316172	0.0280535	0.0646949
sp|O75582|KS6A5_HUMAN	RPS6KA5	KS6A5_HUMAN Ribosomal protein S6 kinase alpha-5	12	5.71138	6.34733	5.955	6.20571	6.42883	6.97331	6.17543	6.37136	6.44332	6.81489	6.59771	6.70063	5.81767	6.03499	5.82235	5.60009	6.05486	6.48723	6.63914	5.81878	1.07141	1.0965	0.96101	0.0995107	0.132903	-0.0573769	0.0463465	0.0526767	0.0237727	0.0305156
sp|Q9HCJ3|RAVR2_HUMAN	RAVER2	RAVR2_HUMAN Ribonucleoprotein PTB-binding 2	8	5.86119	6.26176	6.11691	6.0589	6.0633	6.4767	6.23468	6.35647	6.53138	6.2871	6.89919	6.92521	5.91499	5.64067	6.25298	6.11857	6.07469	6.28279	6.66072	5.9818	1.03426	1.09647	0.984709	0.048594	0.132867	-0.0222305	0.0273168	0.0281022	0.0461234	0.044553
sp|Q00535|CDK5_HUMAN	CDK5	CDK5_HUMAN Cyclin-dependent kinase 5	10	6.11289	6.49261	5.29157	5.86666	6.79662	6.91791	6.30148	6.48571	6.81675	6.57336	6.2876	6.37776	6.29211	5.98045	6.03222	5.3743	5.94093	6.62543	6.51387	5.91977	1.11522	1.09644	0.996438	0.157325	0.132825	-0.00514827	0.0847827	0.0426296	0.0360032	0.0656062
sp|P49591|SYSC_HUMAN	SARS	SYSC_HUMAN Serine--tRNA ligase, cytoplasmic	39	5.95408	6.09471	5.52371	5.93308	6.94682	6.75818	6.33395	6.31311	6.91227	6.36762	6.34099	6.14978	6.72047	5.99936	5.99845	5.65343	5.8764	6.58802	6.44266	6.09293	1.1211	1.09636	1.03685	0.164912	0.132726	0.0522042	0.0418334	0.0478257	0.0508734	0.0736826
sp|O75446|SAP30_HUMAN	SAP30	SAP30_HUMAN Histone deacetylase complex subunit SAP30	3	5.91645	7.04153	5.33617	6.06498	6.63335	6.46739	5.76623	5.94583	6.66828	6.74313	6.51952	6.77489	6.14331	6.32407	5.93141	5.72347	6.08978	6.2032	6.67645	6.03056	1.01862	1.09634	0.990276	0.0266219	0.132692	-0.0140975	0.116284	0.0665981	0.0170404	0.0431345
sp|Q6NUK4|REEP3_HUMAN	REEP3	REEP3_HUMAN Receptor expression-enhancing protein 3	6	6.16643	5.81152	5.8403	6.02578	6.31028	6.72732	5.84668	6.35847	6.76969	6.61899	5.98549	6.7665	6.34678	6.47316	5.76555	6.18705	5.96101	6.31069	6.53517	6.19313	1.05866	1.09632	1.03894	0.082241	0.132668	0.0551137	0.0279557	0.0572196	0.0570963	0.0497582
sp|Q96IZ6|MET2A_HUMAN	METTL2A	MET2A_HUMAN Methyltransferase-like protein 2A	4	6.15009	5.66532	5.64992	5.88293	6.79579	7.56216	6.79567	6.4146	6.96071	6.69751	5.99953	5.93862	6.37358	5.77565	5.89857	5.43935	5.83707	6.89206	6.39909	5.87179	1.18074	1.09629	1.00595	0.239691	0.132624	0.00855662	0.0401301	0.0698648	0.0794867	0.0658681
sp|O14531|DPYL4_HUMAN	DPYSL4	DPYL4_HUMAN Dihydropyrimidinase-related protein 4	9	5.89792	6.01988	6.13584	5.91017	6.39529	6.32973	6.63695	6.13376	6.32166	6.42954	6.6037	6.91501	6.29297	5.86999	6.29226	5.81534	5.99095	6.37393	6.56748	6.06764	1.06393	1.09623	1.0128	0.0893983	0.132554	0.0183501	0.0185397	0.0325674	0.0394662	0.0429714
sp|O75419-3|CDC45_HUMAN	CDC45	CDC45_HUMAN Isoform 3 of Cell division control protein 45 homolog	4	6.09905	5.71354	6.05983	6.12902	6.38425	6.68693	5.85535	6.33215	7.08923	6.44179	5.83045	6.94929	6.77404	6.27442	5.38199	5.99867	6.00036	6.31467	6.57769	6.10728	1.05238	1.09622	1.01782	0.0736583	0.132532	0.0254809	0.0322149	0.0544526	0.0867408	0.0950226
sp|Q969Y2-2|GTPB3_HUMAN	GTPBP3	GTPB3_HUMAN Isoform 2 of tRNA modification GTPase GTPBP3, mitochondrial	10	6.10872	6.51242	5.57241	5.84688	6.71103	6.71196	6.14235	6.15597	6.83629	6.4677	6.51192	6.53755	6.31744	6.19363	6.01782	5.3559	6.01011	6.43033	6.58836	5.9712	1.06992	1.09621	0.993526	0.0975014	0.13253	-0.00937051	0.0665729	0.050497	0.0254665	0.0717148
sp|Q9BSD7|NTPCR_HUMAN	NTPCR	NTPCR_HUMAN Cancer-related nucleoside-triphosphatase	6	6.04711	6.51627	5.67931	5.76669	6.81806	6.80139	6.1293	6.24208	6.76817	6.91234	6.22334	6.41408	6.2303	6.01984	5.6557	5.77601	6.00235	6.49771	6.57948	5.92046	1.08253	1.09615	0.986358	0.114405	0.132448	-0.0198164	0.0627808	0.055909	0.0481102	0.0432655
sp|Q6UWJ1|TMCO3_HUMAN	TMCO3	TMCO3_HUMAN Transmembrane and coiled-coil domain-containing protein 3	4	5.59794	6.03246	6.09788	6.22539	5.91664	6.42694	6.14703	6.32796	6.32641	6.27807	7.15836	6.49393	6.27877	6.41854	6.21645	6.05723	5.98842	6.20464	6.56419	6.24275	1.03611	1.09615	1.04247	0.0511733	0.132443	0.0600063	0.0454822	0.0361451	0.0619676	0.0239938
sp|P28288|ABCD3_HUMAN	ABCD3	ABCD3_HUMAN ATP-binding cassette sub-family D member 3	19	5.87025	6.43971	5.54241	5.9825	6.51485	6.97658	6.21546	6.30186	6.64484	6.60568	6.23694	6.63865	6.35707	6.14088	5.85303	5.67929	5.95872	6.50219	6.53153	6.00757	1.09121	1.09613	1.0082	0.125923	0.132419	0.0117791	0.0622719	0.0523468	0.0301832	0.0500822
sp|Q9UNT1-2|RBL2B_HUMAN	RABL2B	RBL2B_HUMAN Isoform 2 of Rab-like protein 2B	6	5.61543	6.05377	6.41223	6.07458	6.63802	6.40495	6.23148	6.28803	6.57063	6.56759	6.58053	6.75792	5.95612	5.74478	6.02013	6.08381	6.039	6.39062	6.61917	5.95121	1.05822	1.09607	0.985462	0.0816456	0.13234	-0.0211272	0.0540981	0.0281753	0.0139997	0.0247281
sp|Q9H6E5|STPAP_HUMAN	TUT1	STPAP_HUMAN Speckle targeted PIP5K1A-regulated poly(A) polymerase	7	5.62249	6.49221	5.86922	6.53403	6.35068	6.57654	6.20284	6.63762	6.69773	6.37974	6.75489	7.04067	5.8805	5.55307	5.8668	5.54097	6.12949	6.44192	6.71826	5.71034	1.05097	1.09606	0.931617	0.0717243	0.132321	-0.102191	0.0741675	0.0312921	0.0403364	0.0330502
sp|Q9NZV5|SELN_HUMAN	SEPN1	SELN_HUMAN Selenoprotein N	5	5.91432	6.49447	5.51855	6.16143	6.80763	6.80817	6.36783	6.46622	6.53785	6.61052	6.70618	6.54761	6.04221	5.70888	5.67573	5.63241	6.02219	6.61246	6.60054	5.76481	1.09802	1.09604	0.957261	0.134899	0.132295	-0.0630164	0.0683123	0.0346647	0.0117324	0.0325365
sp|O60669|MOT2_HUMAN	SLC16A7	MOT2_HUMAN Monocarboxylate transporter 2	3	5.21387	6.51649	6.7212	6.30142	5.9889	5.89963	7.03831	6.90505	6.07211	8.53447	6.05163	6.47145	5.97683	5.12021	6.07826	5.11017	6.18825	6.45797	6.78242	5.57137	1.04359	1.09602	0.900315	0.061551	0.132269	-0.151499	0.108563	0.0924101	0.174557	0.0948402
sp|Q9Y232|CDYL1_HUMAN	CDYL	CDYL1_HUMAN Chromodomain Y-like protein	7	6.1053	6.4163	5.76143	5.88925	5.93467	6.45662	6.2127	6.04792	8.08805	6.34841	5.99949	6.05627	6.34115	6.16565	6.14141	6.03538	6.04307	6.16298	6.62305	6.1709	1.01984	1.09598	1.02115	0.0283459	0.132215	0.0301987	0.0474008	0.0367701	0.14926	0.0205509
tr|K7EIE5|K7EIE5_HUMAN	PRKAR1A	K7EIE5_HUMAN cAMP-dependent protein kinase type I-alpha regulatory subunit (Fragment)	1	7.77885	4.93208	5.69407	3.95453	5.84657	6.01058	11.0712	8.63273	5.64439	5.22315	6.5615	7.07642	5.63743	4.55799	5.62305	5.7555	5.58988	7.89027	6.12636	5.39349	1.41153	1.09597	0.964867	0.497257	0.132213	-0.0515982	0.290477	0.3137	0.137863	0.103857
sp|Q9BTE1|DCTN5_HUMAN	DCTN5	DCTN5_HUMAN Dynactin subunit 5	4	6.53042	5.95525	6.13457	5.69519	6.2529	6.43239	6.68588	5.82658	7.36879	6.58266	6.35168	6.34476	5.96829	6.77771	5.98559	5.10735	6.07886	6.29944	6.66197	5.95973	1.03629	1.09593	0.980404	0.0514228	0.132149	-0.028552	0.0577325	0.0574393	0.0726521	0.114476
sp|Q86UD1|OAF_HUMAN	OAF	OAF_HUMAN Out at first protein homolog	2	5.8978	5.59734	6.23547	6.85196	5.82668	5.57708	6.33857	5.77814	6.80204	6.09697	7.00328	7.03808	6.70469	5.59136	6.0041	6.65644	6.14564	5.88012	6.73509	6.23915	0.956795	1.09591	1.01521	-0.0637189	0.132134	0.0217851	0.0875761	0.0551304	0.0650255	0.0861009
sp|Q9BVX2|T106C_HUMAN	TMEM106C	T106C_HUMAN Transmembrane protein 106C	1	5.84586	5.81863	5.95965	6.31629	5.67862	7.19529	6.95142	4.87036	5.34526	7.28544	7.16088	6.44407	6.29413	6.62648	5.96044	6.24716	5.98511	6.17392	6.55891	6.28205	1.03155	1.09587	1.04961	0.0448102	0.132079	0.0698588	0.0382752	0.177241	0.135695	0.0434417
sp|Q8N357|S35F6_HUMAN	SLC35F6	S35F6_HUMAN Solute carrier family 35 member F6	1	5.47924	6.42931	5.79663	6.20107	6.90081	6.73618	5.81043	6.4848	6.38912	7.13548	6.53239	6.14054	6.00621	5.94494	6.25114	5.76169	5.97656	6.48306	6.54938	5.99099	1.08475	1.09584	1.00241	0.117358	0.132043	0.00347969	0.0706645	0.0740295	0.0645771	0.0337444
sp|Q9UBM7|DHCR7_HUMAN	DHCR7	DHCR7_HUMAN 7-dehydrocholesterol reductase	9	5.76987	6.5597	5.60305	5.9214	6.87187	6.89534	5.99947	6.54317	6.68693	6.85195	6.11533	6.48592	6.10583	5.84094	6.01206	5.73716	5.9635	6.57746	6.53503	5.924	1.10295	1.09584	0.993375	0.141371	0.132034	-0.00958948	0.0701245	0.0634776	0.0485564	0.0280143
sp|P61619|S61A1_HUMAN	SEC61A1	S61A1_HUMAN Protein transport protein Sec61 subunit alpha isoform 1	17	6.00007	6.33326	5.75151	5.74264	6.80616	6.78068	6.20175	6.48551	6.80529	6.49489	6.41345	6.3941	6.21328	5.87059	5.91436	5.79246	5.95687	6.56852	6.52693	5.94767	1.10268	1.0957	0.998456	0.141015	0.131851	-0.00222927	0.0466437	0.0433193	0.0292084	0.030955
sp|O95900|TRUB2_HUMAN	TRUB2	TRUB2_HUMAN Probable tRNA pseudouridine synthase 2	9	5.67822	6.05108	5.90801	6.05924	6.53282	6.88559	5.96218	6.61219	6.34131	6.44367	6.62656	6.55138	6.51823	5.92393	6.04631	5.85928	5.92414	6.49819	6.49073	6.08694	1.0969	1.09564	1.02748	0.133434	0.131776	0.0391114	0.0300546	0.0597055	0.0192159	0.0489252
sp|Q6ICG6|K0930_HUMAN	KIAA0930	K0930_HUMAN Uncharacterized protein KIAA0930	10	5.89181	6.06022	5.79711	5.96843	6.48498	6.83486	6.32289	6.45845	6.63998	6.36515	6.59905	6.38035	6.15598	6.11574	6.14548	5.77952	5.92939	6.52529	6.49613	6.04918	1.1005	1.09558	1.0202	0.138159	0.131697	0.0288553	0.0188686	0.0334459	0.0221025	0.0298519
sp|Q96NW4|ANR27_HUMAN	ANKRD27	ANR27_HUMAN Ankyrin repeat domain-containing protein 27	4	5.84759	6.84062	5.67959	5.87217	6.73821	6.63576	6.1166	6.27302	6.86314	6.61853	6.49683	6.57791	6.03221	5.72431	5.71495	5.96856	6.05999	6.4409	6.6391	5.86001	1.06286	1.09556	0.966999	0.0879457	0.131672	-0.0484135	0.0870311	0.0456819	0.0237523	0.0280218
sp|Q15345|LRC41_HUMAN	LRRC41	LRC41_HUMAN Leucine-rich repeat-containing protein 41	5	5.83563	6.36525	5.879	6.02696	6.60864	6.76268	6.38647	6.16476	6.39035	7.2582	6.51729	6.24467	6.036	5.79452	5.80755	5.92204	6.02671	6.48064	6.60263	5.89003	1.07532	1.09556	0.977321	0.104765	0.13167	-0.0330963	0.0398388	0.0402951	0.0683089	0.0191724
sp|Q71F23|CENPU_HUMAN	CENPU	CENPU_HUMAN Centromere protein U	1	5.83295	6.77392	4.76457	6.56625	6.03301	5.61084	5.58204	7.83002	6.69495	6.82186	6.59156	6.1165	6.66615	7.17713	5.41679	5.52146	5.98442	6.26398	6.55622	6.19538	1.04671	1.09555	1.03525	0.065867	0.131652	0.0499813	0.15171	0.169889	0.0469635	0.139656
sp|Q8WY91|THAP4_HUMAN	THAP4	THAP4_HUMAN THAP domain-containing protein 4	3	5.58366	6.27978	5.78402	6.33906	6.16795	7.40731	6.36295	5.85014	6.43521	6.96598	6.11392	6.7627	6.09218	6.29751	5.62562	5.93202	5.99663	6.44709	6.56945	5.98683	1.07512	1.09552	0.998366	0.104496	0.131621	-0.00235905	0.0618873	0.104564	0.0569628	0.047352
sp|P31749|AKT1_HUMAN	AKT1	AKT1_HUMAN RAC-alpha serine/threonine-protein kinase	12	5.88364	6.07551	5.5445	6.13593	6.41641	6.76745	6.40377	6.59039	6.80026	6.39171	6.32997	6.37468	6.43034	5.85611	6.17089	5.82843	5.9099	6.5445	6.47415	6.07144	1.10738	1.09548	1.02734	0.147152	0.131559	0.0389068	0.0450575	0.0261737	0.0338201	0.0469839
sp|O95219|SNX4_HUMAN	SNX4	SNX4_HUMAN Sorting nexin-4	14	5.92673	6.3047	5.75782	6.07124	6.44422	6.65356	6.38187	6.564	6.69722	6.40306	6.74176	6.51509	6.12884	5.72754	6.01217	5.67016	6.01512	6.51091	6.58928	5.88468	1.08242	1.09545	0.978314	0.114266	0.131527	-0.0316308	0.0385157	0.0186567	0.0240089	0.0375624
sp|Q8NET4|RGAG1_HUMAN	RGAG1	RGAG1_HUMAN Retrotransposon gag domain-containing protein 1	1	5.98582	6.63168	6.16184	5.12381	6.85905	6.95071	6.28553	7.03771	7.08886	6.28592	6.84242	5.96721	5.97425	5.6698	5.5381	5.59728	5.97579	6.78325	6.5461	5.69486	1.13512	1.09544	0.952989	0.182848	0.131507	-0.0694691	0.105429	0.0500847	0.0781533	0.0340469
sp|Q8N122|RPTOR_HUMAN	RPTOR	RPTOR_HUMAN Regulatory-associated protein of mTOR	17	5.84016	6.46225	5.6658	6.02631	6.53387	6.98478	6.27424	6.32609	6.88432	6.61287	6.27948	6.50771	6.24369	5.74293	5.87512	5.74037	5.99863	6.52975	6.57109	5.90053	1.08854	1.09543	0.983646	0.122394	0.131501	-0.0237891	0.0570704	0.0495327	0.0381884	0.0402119
sp|Q01415|GALK2_HUMAN	GALK2	GALK2_HUMAN N-acetylgalactosamine kinase	10	5.89057	5.8928	5.86417	6.22832	6.58184	6.54242	6.29241	6.31907	6.82527	6.44465	6.40556	6.47812	6.13377	6.01014	6.10487	5.98602	5.96896	6.43393	6.5384	6.0587	1.0779	1.0954	1.01503	0.108221	0.131457	0.0215275	0.0290488	0.0232045	0.0295993	0.0118285
sp|Q6PIY7|GLD2_HUMAN	PAPD4	GLD2_HUMAN Poly(A) RNA polymerase GLD2	1	4.74263	6.72615	7.69142	4.71592	5.86595	5.6325	4.69487	4.95511	7.41594	6.44318	5.98767	6.30686	7.69407	6.6016	6.38522	8.14091	5.96903	5.28711	6.53841	7.20545	0.885757	1.09539	1.20714	-0.175018	0.131444	0.271592	0.248756	0.104474	0.0941168	0.117523
sp|Q9Y5Q8-3|TF3C5_HUMAN	GTF3C5	TF3C5_HUMAN Isoform 3 of General transcription factor 3C polypeptide 5	16	5.933	6.35775	5.70557	6.05316	6.49598	7.00382	5.85399	6.26498	6.74653	6.72771	6.56075	6.30844	6.22548	6.03402	5.93366	5.79517	6.01237	6.40469	6.58586	5.99708	1.06525	1.09538	0.997457	0.0911955	0.131438	-0.00367298	0.0451814	0.0748843	0.0308114	0.0301872
sp|Q96RU3|FNBP1_HUMAN	FNBP1	FNBP1_HUMAN Formin-binding protein 1	20	5.78309	6.14674	5.88765	6.13236	6.22855	6.78343	6.57335	6.72345	6.50595	6.53142	6.59172	6.60488	5.82545	5.88985	6.22013	5.57197	5.98746	6.57719	6.55849	5.87685	1.0985	1.09537	0.981526	0.135528	0.13142	-0.026901	0.030201	0.037806	0.00723221	0.0454046
sp|Q96FC9|DDX11_HUMAN	DDX11	DDX11_HUMAN Probable ATP-dependent RNA helicase DDX11	10	5.91001	6.52276	5.81147	5.65051	6.81755	6.99177	6.11706	6.31233	6.74098	6.53873	6.54902	6.34484	6.02116	6.03975	5.98368	5.64838	5.97369	6.55968	6.54339	5.92324	1.0981	1.09537	0.991555	0.135003	0.131417	-0.0122346	0.063839	0.0628734	0.024724	0.0311855
sp|O95470|SGPL1_HUMAN	SGPL1	SGPL1_HUMAN Sphingosine-1-phosphate lyase 1	21	5.73078	6.47991	5.86055	5.95181	6.82763	6.92804	6.33585	6.2732	6.60888	6.45319	6.64014	6.60962	6.00135	5.88089	5.93254	5.48563	6.00576	6.59118	6.57796	5.8251	1.09748	1.09527	0.969919	0.134189	0.131292	-0.044064	0.0547559	0.0507509	0.0128374	0.0397644
sp|P60842|IF4A1_HUMAN	EIF4A1	IF4A1_HUMAN Eukaryotic initiation factor 4A-I	45	5.86656	6.42164	5.53092	6.08321	6.74885	6.91539	6.18672	6.30651	6.64297	7.19384	6.25475	6.08759	6.47547	5.88992	5.71532	5.68034	5.97558	6.53937	6.54479	5.94026	1.09435	1.09526	0.994089	0.130072	0.131267	-0.00855267	0.0626278	0.0532562	0.0750639	0.0620163
sp|Q5SSJ5|HP1B3_HUMAN	HP1BP3	HP1B3_HUMAN Heterochromatin protein 1-binding protein 3	30	6.11115	6.72728	5.43176	5.66891	6.86407	7.22438	5.85936	6.13853	7.17401	6.76802	6.06648	6.2096	6.46669	6.12436	5.76792	5.39747	5.98477	6.52158	6.55453	5.93911	1.0897	1.0952	0.99237	0.123926	0.131195	-0.0110503	0.0951527	0.0968369	0.0781175	0.0774855
sp|Q9ULQ1-3|TPC1_HUMAN	TPCN1	TPC1_HUMAN Isoform 3 of Two pore calcium channel protein 1	1	5.34804	4.58497	5.65574	7.93524	6.10076	5.44381	6.13274	6.18073	7.06843	6.02868	6.09915	6.56693	6.99223	6.41142	6.40913	7.04201	5.881	5.96451	6.4408	6.7137	1.0142	1.09519	1.14159	0.0203427	0.131178	0.191047	0.245124	0.0584601	0.0748045	0.0522741
sp|Q8N4U5|T11L2_HUMAN	TCP11L2	T11L2_HUMAN T-complex protein 11-like protein 2	2	5.90585	6.16132	5.68173	6.39475	6.18496	6.64938	6.0953	6.74614	6.38505	6.15071	6.99409	6.91197	5.89052	5.17886	6.66668	6.00269	6.03591	6.41894	6.61045	5.93469	1.06346	1.09519	0.98323	0.0887643	0.131178	-0.0243998	0.0512302	0.0508527	0.061774	0.102664
sp|Q7Z4R8|CF120_HUMAN	C6orf120	CF120_HUMAN UPF0669 protein C6orf120	1	6.95269	6.63742	4.36952	6.03088	6.65948	6.5763	7.18053	6.59929	5.97935	7.20348	6.36366	6.72634	6.87037	4.6794	6.01449	5.15678	5.99763	6.7539	6.56821	5.68026	1.1261	1.09513	0.947084	0.171329	0.131108	-0.078435	0.191883	0.0424309	0.07946	0.170195
sp|Q09161|NCBP1_HUMAN	NCBP1	NCBP1_HUMAN Nuclear cap-binding protein subunit 1	32	5.89363	6.41455	5.64649	5.99995	6.56886	6.7354	6.15392	6.47303	6.80973	6.45161	6.45438	6.51305	6.26457	5.89877	6.05823	5.66382	5.98865	6.4828	6.55719	5.97135	1.08251	1.09494	0.99711	0.114386	0.130846	-0.00417549	0.053471	0.0377288	0.0260364	0.0425168
sp|P09417|DHPR_HUMAN	QDPR	DHPR_HUMAN Dihydropteridine reductase	13	5.95663	6.32154	5.9709	5.91735	6.79547	6.78758	6.30307	6.59082	6.90129	6.36185	6.5089	6.68686	5.95796	5.68858	5.93277	5.31842	6.0416	6.61923	6.61472	5.72443	1.09561	1.09486	0.947502	0.131733	0.130749	-0.0777992	0.0311162	0.0349074	0.0351812	0.0518284
sp|Q9Y4E6|WDR7_HUMAN	WDR7	WDR7_HUMAN WD repeat-containing protein 7	3	5.66516	6.97262	5.76873	5.87557	6.2461	7.29799	6.33223	6.80911	6.88103	6.63861	7.10122	5.96296	5.16333	5.73333	6.14811	5.4039	6.07052	6.67136	6.64595	5.61217	1.09898	1.09479	0.924495	0.13616	0.130656	-0.113262	0.100074	0.0727926	0.0741762	0.0760679
sp|Q9NUL7|DDX28_HUMAN	DDX28	DDX28_HUMAN Probable ATP-dependent RNA helicase DDX28	6	5.92982	6.80937	5.23829	6.02415	6.97504	6.88887	6.04465	6.3845	6.88511	6.65246	6.2894	6.44974	6.24487	5.93694	5.67183	5.57494	6.00041	6.57327	6.56918	5.85714	1.09547	1.09479	0.976125	0.13155	0.130652	-0.0348629	0.107179	0.0666662	0.0392348	0.0512839
sp|Q96L93-2|KI16B_HUMAN	KIF16B	KI16B_HUMAN Isoform 2 of Kinesin-like protein KIF16B	8	5.70752	6.3374	5.49243	6.33226	7.06601	6.33511	6.15974	6.35229	6.41557	6.36662	6.53903	6.81065	6.22992	6.10574	6.06349	5.68623	5.9674	6.47829	6.53297	6.02135	1.08561	1.09478	1.00904	0.118509	0.130635	0.0129827	0.0726054	0.0619544	0.0304346	0.0389133
sp|Q7Z4H8|KDEL2_HUMAN	KDELC2	KDEL2_HUMAN KDEL motif-containing protein 2	17	5.91918	6.30646	5.76896	6.16031	6.61706	6.68565	6.41871	6.54077	6.77873	6.46187	6.70445	6.49847	6.04731	5.80204	5.88904	5.40099	6.03873	6.56555	6.61088	5.78485	1.08724	1.09475	0.957958	0.120671	0.130598	-0.0619663	0.0398272	0.0174223	0.0233964	0.0475914
sp|Q9HAC8|UBTD1_HUMAN	UBTD1	UBTD1_HUMAN Ubiquitin domain-containing protein 1	1	5.88791	6.09265	6.15878	6.70793	5.80245	6.62833	6.26646	6.04032	7.03192	6.51457	6.83769	6.81607	5.7933	5.76715	6.0861	5.56836	6.21182	6.18439	6.80006	5.80373	0.995585	1.0947	0.934304	-0.00638414	0.130533	-0.0980357	0.0563869	0.056821	0.0314185	0.0367641
sp|P16615|AT2A2_HUMAN	ATP2A2	AT2A2_HUMAN Sarcoplasmic/endoplasmic reticulum calcium ATPase 2	60	5.88649	6.30605	5.76153	5.89129	6.72004	6.81567	6.28034	6.49333	6.84821	6.49781	6.37607	6.38135	6.18257	5.87812	6.06683	5.6143	5.96134	6.57735	6.52586	5.93546	1.10333	1.0947	0.995658	0.141869	0.130531	-0.00627803	0.0398447	0.0364499	0.0340374	0.0418101
sp|O15375|MOT6_HUMAN	SLC16A5	MOT6_HUMAN Monocarboxylate transporter 6	1	6.06122	6.61095	5.27087	6.33301	6.50959	6.40323	5.64905	6.23469	6.38335	6.46976	6.97362	6.74681	6.17946	5.47882	6.57209	6.12349	6.06901	6.19914	6.64339	6.08847	1.02144	1.09464	1.00321	0.0306063	0.130457	0.00461676	0.0951538	0.0619109	0.0405317	0.0743691
sp|Q9Y4H2|IRS2_HUMAN	IRS2	IRS2_HUMAN Insulin receptor substrate 2	6	5.92008	6.2548	5.72509	6.13498	6.53537	6.68903	6.2108	6.06157	7.22563	6.25836	6.41457	6.4094	6.09681	5.70811	6.25637	6.09903	6.00874	6.37419	6.57699	6.04008	1.06082	1.09457	1.00522	0.0851807	0.130366	0.00750576	0.0390063	0.0452456	0.0666648	0.0386717
sp|Q13418|ILK_HUMAN	ILK	ILK_HUMAN Integrin-linked protein kinase	14	5.87752	6.57355	5.42529	5.61952	6.89318	6.96841	6.13949	6.52632	6.94944	6.51198	6.13337	6.11954	6.66275	6.01435	5.98583	5.59946	5.87397	6.63185	6.42858	6.0656	1.12902	1.09442	1.03262	0.175075	0.130165	0.0463139	0.0854319	0.0574261	0.0609719	0.0726691
sp|Q9H3R0|KDM4C_HUMAN	KDM4C	KDM4C_HUMAN Lysine-specific demethylase 4C	1	6.10647	4.95025	6.37973	6.24012	5.86488	6.27207	5.67876	7.58156	6.29846	5.97633	6.74409	6.8918	6.0426	6.24748	6.06436	6.66103	5.91914	6.34932	6.47767	6.25387	1.07268	1.09436	1.05655	0.101213	0.130087	0.0793605	0.110741	0.135139	0.0646382	0.045823
sp|Q9BTT6|LRRC1_HUMAN	LRRC1	LRRC1_HUMAN Leucine-rich repeat-containing protein 1	12	5.70055	6.40084	5.92225	5.80161	6.30002	6.58969	6.25675	6.7399	6.48724	6.2862	6.71488	6.58273	6.23991	6.00292	6.08445	5.89006	5.95631	6.47159	6.51776	6.05434	1.08651	1.09426	1.01646	0.119701	0.129957	0.0235491	0.0520287	0.0358555	0.0276777	0.0243078
sp|Q27J81|INF2_HUMAN	INF2	INF2_HUMAN Inverted formin-2	19	5.8	6.44004	5.75454	5.97372	6.7619	6.98798	6.18277	6.20441	6.74549	6.45588	6.3194	6.706	6.03671	5.84764	5.97065	5.81286	5.99207	6.53427	6.55669	5.91697	1.09048	1.09423	0.987465	0.124969	0.129913	-0.0181983	0.0522728	0.0618519	0.0310584	0.0176891
sp|A6NHX0|GATL2_HUMAN	GATSL2	GATL2_HUMAN GATS-like protein 2	1	5.65171	6.91728	5.68421	5.56755	7.28306	6.9939	6.71057	6.21829	6.93581	6.51205	6.37225	6.24437	6.03067	6.10335	5.52971	5.24521	5.95519	6.80145	6.51612	5.72724	1.14211	1.09419	0.961722	0.191696	0.129866	-0.0563081	0.108019	0.0666949	0.0460996	0.0716303
sp|Q9BWK5|MRI_HUMAN	MRI	MRI_HUMAN Modulator of retrovirus infection homolog	1	5.0616	6.24764	6.85811	5.99216	5.99166	6.83274	5.35129	6.82135	6.34863	6.21293	6.7146	7.15782	6.25764	5.92917	6.19684	6.02582	6.03988	6.24926	6.6085	6.10237	1.03467	1.09414	1.01035	0.0491661	0.129802	0.0148498	0.123602	0.114666	0.0640223	0.0248327
sp|O00400|ACATN_HUMAN	SLC33A1	ACATN_HUMAN Acetyl-coenzyme A transporter 1	3	5.7125	6.00575	6.62722	6.22596	6.36948	6.66123	6.2126	6.58048	6.54106	6.48712	6.93392	6.92206	5.38329	5.65396	6.08028	5.60309	6.14286	6.45595	6.72104	5.68016	1.05097	1.09412	0.924676	0.0717189	0.129775	-0.11298	0.0627339	0.0315349	0.0357127	0.0513127
sp|Q96EW2|HBAP1_HUMAN	HSPBAP1	HBAP1_HUMAN HSPB1-associated protein 1	5	5.61607	5.95792	6.03366	6.54311	6.37902	6.65692	5.93801	6.04536	6.49231	6.16633	6.938	6.82594	6.16482	5.88613	6.26587	6.09052	6.03769	6.25483	6.60564	6.10183	1.03596	1.09407	1.01062	0.0509734	0.129703	0.0152465	0.0634006	0.0523256	0.0527923	0.0263462
sp|Q7Z7A4|PXK_HUMAN	PXK	PXK_HUMAN PX domain-containing protein kinase-like protein	3	5.87979	6.21566	5.73168	6.33294	6.57527	6.44929	6.10389	6.38316	6.49078	6.48102	6.70295	6.75703	6.17877	6.03946	5.90199	5.77633	6.04002	6.3779	6.60794	5.97414	1.05594	1.09403	0.989093	0.0785293	0.129649	-0.0158223	0.0465737	0.0312484	0.0215952	0.0290688
sp|Q8N5D0|WDTC1_HUMAN	WDTC1	WDTC1_HUMAN WD and tetratricopeptide repeats protein 1	8	6.03694	6.33564	5.81439	5.83531	6.81689	6.92182	6.20348	6.36158	6.44365	6.70184	6.59087	6.54399	6.12765	5.91441	5.7772	5.57436	6.00557	6.57594	6.57009	5.8484	1.09497	1.094	0.97383	0.130897	0.129611	-0.038258	0.0402703	0.0528513	0.0163123	0.0397957
sp|Q6NUK1|SCMC1_HUMAN	SLC25A24	SCMC1_HUMAN Calcium-binding mitochondrial carrier protein SCaMC-1	21	5.87038	6.42422	5.65146	5.97527	6.4505	6.79883	6.15403	6.42835	6.56154	6.57349	6.41318	6.61962	6.39259	5.8719	6.13215	5.6825	5.98033	6.45793	6.54196	6.01979	1.07986	1.09391	1.0066	0.110846	0.129497	0.00948626	0.054382	0.0409201	0.0136701	0.0514022
sp|Q00325|MPCP_HUMAN	SLC25A3	MPCP_HUMAN Phosphate carrier protein, mitochondrial	50	5.84932	6.44482	5.45572	5.89451	6.81824	7.10384	6.27721	6.33958	6.63854	6.74489	6.26217	6.21864	6.4156	5.92931	5.96809	5.63952	5.91109	6.63472	6.46606	5.98813	1.12242	1.09389	1.01303	0.16661	0.129462	0.0186807	0.0688101	0.0595734	0.0409451	0.0535191
sp|Q8N1G2|CMTR1_HUMAN	CMTR1	CMTR1_HUMAN Cap-specific mRNA (nucleoside-2'-O-)-methyltransferase 1	23	5.86116	6.35534	5.70714	6.19139	6.62007	6.9263	6.21714	6.49464	6.94735	6.20402	6.56292	6.66476	6.22188	5.64787	5.9926	5.38543	6.02876	6.56454	6.59476	5.81194	1.08887	1.09388	0.964037	0.122833	0.12946	-0.0528396	0.0492644	0.044805	0.0465656	0.0635704
sp|P57740|NU107_HUMAN	NUP107	NU107_HUMAN Nuclear pore complex protein Nup107	30	5.92235	6.27142	5.7334	6.06578	6.70954	6.79658	6.1045	6.40658	6.8384	6.47613	6.36711	6.56378	6.27948	5.90246	5.91774	5.64475	5.99824	6.5043	6.56136	5.93611	1.08437	1.09388	0.989642	0.116855	0.129455	-0.0150214	0.0379058	0.0483697	0.0307035	0.0439575
sp|Q7Z6L1-4|TCPR1_HUMAN	TECPR1	TCPR1_HUMAN Isoform 4 of Tectonin beta-propeller repeat-containing protein 1	2	6.14051	5.75547	5.61365	6.57438	7.5041	5.61369	6.55891	6.37487	7.03001	6.57296	6.05841	6.68222	5.83986	5.48575	6.3084	5.8868	6.021	6.51289	6.5859	5.8802	1.0817	1.09382	0.976615	0.113295	0.129377	-0.0341379	0.0715615	0.119336	0.0610466	0.0573034
sp|P53618|COPB_HUMAN	COPB1	COPB_HUMAN Coatomer subunit beta	59	5.97706	6.36275	5.8094	5.8754	6.72919	6.96511	6.18603	6.34363	6.6584	6.61446	6.58338	6.42067	6.07101	5.98896	5.84043	5.57412	6.00615	6.55599	6.56923	5.86863	1.09155	1.09375	0.977103	0.126373	0.129283	-0.0334174	0.041213	0.0542398	0.0157873	0.0371983
sp|Q9NWX6|THG1_HUMAN	THG1L	THG1_HUMAN Probable tRNA(His) guanylyltransferase	11	6.13988	6.48006	5.55614	5.59608	7.13915	6.98568	6.48339	6.56945	7.06112	6.32635	6.41664	6.19448	5.97225	5.56317	6.26096	5.25521	5.94304	6.79442	6.49965	5.7629	1.14326	1.09366	0.969688	0.193149	0.12916	-0.0444067	0.0750748	0.0467567	0.0592757	0.0769223
sp|Q8N392|RHG18_HUMAN	ARHGAP18	RHG18_HUMAN Rho GTPase-activating protein 18	41	5.776	6.42496	5.77393	6.00674	6.79753	6.92229	6.33187	6.54381	6.72181	6.36694	6.67872	6.45837	6.14149	5.58957	6.01188	5.45408	5.99541	6.64888	6.55646	5.79925	1.10899	1.09358	0.967283	0.149252	0.129059	-0.0479902	0.0511233	0.0396391	0.0260967	0.0567947
sp|Q8WUM0|NU133_HUMAN	NUP133	NU133_HUMAN Nuclear pore complex protein Nup133	27	5.79562	6.53424	5.65639	5.9529	6.65805	6.92243	6.14459	6.37962	6.86634	6.52466	6.25908	6.52829	6.17834	5.91205	5.97125	5.71613	5.98479	6.52617	6.54459	5.94444	1.09046	1.09354	0.993259	0.124937	0.129003	-0.00975851	0.0644648	0.0516979	0.0380159	0.0320072
sp|O00750|P3C2B_HUMAN	PIK3C2B	P3C2B_HUMAN Phosphatidylinositol 4-phosphate 3-kinase C2 domain-containing subunit beta	3	5.25742	6.4467	5.99812	5.68855	7.07808	7.37925	6.24954	6.24499	6.6307	6.63867	6.00925	6.29844	6.32694	5.99002	6.03415	5.72918	5.8477	6.73796	6.39426	6.02007	1.15224	1.09347	1.02948	0.204444	0.12891	0.0419122	0.0857989	0.0860499	0.0471817	0.040676
sp|Q9H0X9|OSBL5_HUMAN	OSBPL5	OSBL5_HUMAN Oxysterol-binding protein-related protein 5	9	5.73661	6.4305	5.81288	6.24478	6.32839	6.93218	6.4439	6.3193	6.82423	6.55858	6.58212	6.52224	6.0174	5.77239	5.71777	5.75675	6.05619	6.50594	6.62179	5.81608	1.07426	1.09339	0.960352	0.103347	0.128811	-0.0583646	0.0553424	0.0445382	0.0207176	0.023412
sp|Q13630|FCL_HUMAN	TSTA3	FCL_HUMAN GDP-L-fucose synthase	15	5.74559	6.47411	5.68956	6.10008	6.82119	6.98686	6.23531	6.48412	6.53863	6.70619	6.62337	6.38156	6.0463	5.80884	5.88794	5.47035	6.00234	6.63187	6.56244	5.80336	1.10488	1.09331	0.96685	0.143892	0.128708	-0.048636	0.0605197	0.0508333	0.0211259	0.0418667
sp|Q9NWW6|NRK1_HUMAN	NMRK1	NRK1_HUMAN Nicotinamide riboside kinase 1	2	5.54576	6.5608	6.32148	6.39161	6.88115	5.13738	5.788	6.20914	6.70568	6.49157	6.99483	6.94294	6.6194	6.0006	5.1442	6.26546	6.20491	6.00392	6.78376	6.00742	0.967607	1.09329	0.968171	-0.0475067	0.128673	-0.0466665	0.0726473	0.121984	0.0341875	0.104676
sp|P49642|PRI1_HUMAN	PRIM1	PRI1_HUMAN DNA primase small subunit	18	5.90692	6.16403	5.65448	6.08345	6.75801	6.85795	5.99352	6.46627	6.85059	6.50424	6.23268	6.4416	6.49078	5.98232	5.98065	5.6325	5.95222	6.51894	6.50728	6.02156	1.09521	1.09325	1.01165	0.131209	0.128626	0.01671	0.0379142	0.0594721	0.0394387	0.0586949
sp|P17812|PYRG1_HUMAN	CTPS1	PYRG1_HUMAN CTP synthase 1	29	5.73998	6.42039	5.68041	6.03881	6.94456	6.79733	6.39229	6.43821	6.82291	6.27659	6.52571	6.48022	6.21684	5.77067	5.97529	5.47978	5.9699	6.6431	6.52636	5.86064	1.11277	1.09321	0.981699	0.15415	0.128572	-0.0266467	0.0567515	0.0407227	0.0345415	0.0533403
sp|Q96AP4|ZUFSP_HUMAN	ZUFSP	ZUFSP_HUMAN Zinc finger with UFM1-specific peptidase domain protein	2	6.56936	6.04867	5.73127	5.8503	6.32187	6.58356	5.64516	5.85883	6.07893	6.9905	6.69835	6.68737	6.32584	5.83147	7.54236	5.23617	6.0499	6.10236	6.61379	6.23396	1.00867	1.09321	1.03042	0.0124548	0.128565	0.0432376	0.0611957	0.0700427	0.0579411	0.157114
sp|O75367|H2AY_HUMAN	H2AFY	H2AY_HUMAN Core histone macro-H2A.1	4	5.91862	6.18299	5.65956	5.90848	6.88233	7.03153	6.16811	6.27203	6.57969	6.77213	6.23266	6.29053	7.12501	6.11046	5.38077	5.4851	5.91741	6.5885	6.46875	6.02533	1.11341	1.09317	1.01824	0.154984	0.128521	0.026075	0.0361266	0.0655466	0.0390929	0.132906
sp|Q8IXU6|S35F2_HUMAN	SLC35F2	S35F2_HUMAN Solute carrier family 35 member F2	8	5.88972	6.23841	5.68331	5.82507	5.76526	7.07465	6.37865	6.56433	6.27889	6.66413	6.64375	6.25078	6.08464	6.02871	6.48188	6.14782	5.90913	6.44572	6.45939	6.18576	1.09081	1.09312	1.04681	0.125397	0.128452	0.0660063	0.0399113	0.0838887	0.034848	0.0328689
sp|O43402|EMC8_HUMAN	EMC8	EMC8_HUMAN ER membrane protein complex subunit 8	8	6.00295	6.39706	5.36646	5.9382	6.59395	6.88107	6.18389	6.43769	6.99744	6.48531	6.17074	6.25851	6.25675	5.7856	6.37565	5.86874	5.92617	6.52415	6.478	6.07168	1.10091	1.09312	1.02456	0.138691	0.128449	0.0349975	0.0716614	0.0447326	0.0572384	0.0475136
sp|Q9Y2I1|NISCH_HUMAN	NISCH	NISCH_HUMAN Nischarin	11	5.66661	6.07968	6.06746	6.16931	6.51218	6.23098	6.31822	6.06075	6.46138	6.19042	6.82338	6.73965	6.12335	6.04874	6.2827	6.22518	5.99576	6.28053	6.55371	6.16999	1.04749	1.09306	1.02906	0.066943	0.128367	0.0413249	0.0373739	0.0299068	0.0438534	0.016902
sp|P36402-3|TCF7_HUMAN	TCF7	TCF7_HUMAN Isoform 1L of Transcription factor 7	1	5.5344	5.5253	6.05356	6.94674	5.6985	5.28463	6.14135	6.36798	5.73076	6.55793	8.21433	5.79487	6.63469	5.77726	6.86461	6.87309	6.015	5.87311	6.57447	6.53741	0.976411	1.09301	1.08685	-0.0344389	0.12831	0.120155	0.111128	0.0818729	0.175832	0.0793376
sp|P42704|LPPRC_HUMAN	LRPPRC	LPPRC_HUMAN Leucine-rich PPR motif-containing protein, mitochondrial	175	5.86748	6.54672	5.56852	5.8112	6.87118	6.91928	6.25367	6.53365	6.75947	6.52437	6.35179	6.37139	6.21665	5.89631	5.95897	5.54934	5.94848	6.64444	6.50176	5.90532	1.117	1.09301	0.992744	0.159628	0.128308	-0.0105064	0.070504	0.0469478	0.0289672	0.0465408
sp|Q9UKA4|AKA11_HUMAN	AKAP11	AKA11_HUMAN A-kinase anchor protein 11	17	5.94214	6.56149	5.53192	5.90224	6.65167	7.04515	6.36959	6.21186	6.76293	6.66992	6.28814	6.4419	6.13038	5.91033	5.98954	5.5908	5.98445	6.56957	6.54072	5.90526	1.09777	1.09295	0.986768	0.13458	0.128232	-0.0192169	0.0713073	0.0556419	0.0329842	0.0387012
sp|P47736-4|RPGP1_HUMAN	RAP1GAP	RPGP1_HUMAN Isoform 4 of Rap1 GTPase-activating protein 1	13	5.74684	6.11131	5.93413	6.28856	6.72079	6.56955	6.04819	6.42372	6.7459	6.35118	6.53504	6.68585	6.15469	5.97791	5.89905	5.8073	6.02021	6.44056	6.57949	5.95974	1.06982	1.0929	0.989955	0.0973729	0.128162	-0.014565	0.0386536	0.0447681	0.0267754	0.0247472
sp|Q9UJX3|APC7_HUMAN	ANAPC7	APC7_HUMAN Anaphase-promoting complex subunit 7	27	5.95696	6.50229	5.55824	5.81881	6.52834	7.12071	6.17714	6.37709	6.74985	6.52113	6.22688	6.55202	6.1923	6.00917	5.95883	5.75024	5.95908	6.55082	6.51247	5.97763	1.0993	1.09287	1.00311	0.136587	0.128116	0.0044864	0.0668042	0.062014	0.0331176	0.0304109
sp|Q8TF05|PP4R1_HUMAN	PPP4R1	PP4R1_HUMAN Serine/threonine-protein phosphatase 4 regulatory subunit 1	11	5.99342	6.42675	5.68545	5.69594	6.45947	7.06176	6.4496	6.4523	6.61562	6.29651	6.57522	6.52379	6.22841	5.94571	5.93422	5.65584	5.95039	6.60578	6.50278	5.94104	1.11014	1.09283	0.99843	0.150745	0.128073	-0.00226751	0.0585155	0.0460223	0.0219228	0.0393535
sp|O94832|MYO1D_HUMAN	MYO1D	MYO1D_HUMAN Unconventional myosin-Id	18	5.98563	6.61286	5.88982	5.60868	6.56023	6.9	5.95299	6.15185	6.59068	6.87082	6.41242	6.4587	6.26387	6.15885	5.91148	5.67109	6.02425	6.39127	6.58316	6.00132	1.06092	1.09278	0.996195	0.085321	0.127998	-0.00550058	0.0703428	0.0661827	0.0313091	0.0441775
sp|O14735|CDIPT_HUMAN	CDIPT	CDIPT_HUMAN CDP-diacylglycerol--inositol 3-phosphatidyltransferase	3	5.76992	6.54884	5.75329	5.65148	6.66538	6.98224	6.30263	6.88514	6.40887	6.86702	6.02027	6.62778	5.94482	5.93164	6.01791	5.62276	5.93088	6.70885	6.48099	5.87928	1.13117	1.09275	0.9913	0.177818	0.127966	-0.0126067	0.0700208	0.0449421	0.0554921	0.0297951
sp|Q9Y366|IFT52_HUMAN	IFT52	IFT52_HUMAN Intraflagellar transport protein 52 homolog	6	6.04046	6.29123	5.70013	5.89784	6.28373	6.91472	5.83205	6.58229	6.76616	6.43055	6.22224	6.72973	6.43251	5.99778	5.97883	5.89976	5.98241	6.4032	6.53717	6.07722	1.07034	1.09273	1.01585	0.0980645	0.127938	0.0226835	0.0415739	0.0718058	0.0395034	0.0395961
sp|Q9NVI1|FANCI_HUMAN	FANCI	FANCI_HUMAN Fanconi anemia group I protein	33	5.83859	6.49638	5.75658	5.8579	6.60645	6.98203	6.2566	6.38302	6.72816	6.55775	6.53383	6.34973	6.06139	5.96949	6.0685	5.5536	5.98736	6.55702	6.54237	5.91324	1.09514	1.0927	0.987621	0.131121	0.127892	-0.0179706	0.0571497	0.0485162	0.0236691	0.0412576
tr|K7ES78|K7ES78_HUMAN	CAPNS1	K7ES78_HUMAN Calpain small subunit 1 (Fragment)	1	6.19988	5.33571	6.6327	6.17121	5.33755	4.6555	4.95843	6.63554	6.02807	7.41786	7.25045	5.89922	5.88621	6.45255	6.29728	8.84183	6.08488	5.39675	6.6489	6.86947	0.886913	1.09269	1.12894	-0.173135	0.127888	0.174971	0.0891111	0.161526	0.119712	0.194548
sp|P43897|EFTS_HUMAN	TSFM	EFTS_HUMAN Elongation factor Ts, mitochondrial	17	6.11571	6.33138	5.5257	5.69205	6.93435	6.98315	6.27223	6.62227	7.01169	6.38221	6.38431	6.07694	6.18437	6.07854	5.94717	5.45794	5.91621	6.703	6.46379	5.91701	1.13299	1.09256	1.00013	0.180134	0.127707	0.000193851	0.0628599	0.0490344	0.0607657	0.0542596
sp|Q86YV9|HPS6_HUMAN	HPS6	HPS6_HUMAN Hermansky-Pudlak syndrome 6 protein	9	5.97802	6.3184	5.34437	6.17308	6.51211	6.92513	6.17183	6.27389	6.83903	6.40971	6.30037	6.46837	6.01301	6.10859	6.05772	6.10638	5.95347	6.47074	6.50437	6.07142	1.08689	1.09253	1.01981	0.120201	0.127679	0.028305	0.0721166	0.051741	0.0359322	0.00748958
sp|Q9BT78|CSN4_HUMAN	COPS4	CSN4_HUMAN COP9 signalosome complex subunit 4	36	5.8977	6.29673	5.82164	5.97517	6.47012	6.89161	6.31013	6.44212	6.76097	6.57941	6.5844	6.28247	5.91736	5.98511	6.00794	5.77712	5.99781	6.52849	6.55181	5.92188	1.08848	1.09237	0.987341	0.122315	0.127458	-0.01838	0.0348302	0.0385891	0.0302853	0.0175436
sp|Q9NSD9|SYFB_HUMAN	FARSB	SYFB_HUMAN Phenylalanine--tRNA ligase beta subunit	48	5.89916	6.44116	5.59654	6.04243	6.70462	6.76832	6.09269	6.33311	6.73579	6.52687	6.43157	6.49969	6.33285	5.92943	6.05681	5.60897	5.99482	6.47469	6.54848	5.98201	1.08005	1.09236	0.997864	0.111093	0.127443	-0.00308551	0.0585237	0.0492504	0.0200274	0.0502067
sp|Q8NBN7|RDH13_HUMAN	RDH13	RDH13_HUMAN Retinol dehydrogenase 13	14	5.8674	6.47196	5.63113	6.12028	6.66916	6.88127	6.02186	6.38123	6.91073	6.35986	6.46579	6.57895	6.12153	5.8563	6.05354	5.609	6.02269	6.48838	6.57883	5.91009	1.07732	1.09234	0.981304	0.10745	0.127423	-0.0272279	0.059774	0.0574032	0.0362778	0.0389328
sp|P22570-3|ADRO_HUMAN	FDXR	ADRO_HUMAN Isoform 3 of NADPH:adrenodoxin oxidoreductase, mitochondrial	27	5.8176	6.40924	5.5838	6.01677	6.74902	6.99078	6.01653	6.5036	6.71358	6.51947	6.37016	6.42269	6.47318	5.81578	6.0215	5.57629	5.95685	6.56498	6.50648	5.97169	1.10209	1.09227	1.00249	0.140241	0.127326	0.00358843	0.0587002	0.0634015	0.0232517	0.063738
sp|Q9H9F9|ARP5_HUMAN	ACTR5	ARP5_HUMAN Actin-related protein 5	6	5.67709	6.25021	5.83046	6.56409	6.55843	6.17981	6.05744	6.12731	6.23126	6.19426	6.97113	7.16848	5.85396	6.03912	6.0788	6.21816	6.08046	6.23075	6.64128	6.04751	1.02472	1.09223	0.994581	0.0352242	0.127281	-0.00783981	0.066325	0.0359719	0.0755214	0.0248279
sp|Q96HW7|INT4_HUMAN	INTS4	INT4_HUMAN Integrator complex subunit 4	17	5.82773	6.45897	5.72185	5.90482	6.63156	7.14037	6.36325	6.46241	6.54042	6.39495	6.52174	6.66102	6.18301	5.87845	5.90974	5.3997	5.97834	6.6494	6.52953	5.84272	1.11225	1.0922	0.977315	0.153478	0.127234	-0.0331042	0.0550454	0.0519673	0.0166788	0.0557087
sp|P11498|PYC_HUMAN	PC	PYC_HUMAN Pyruvate carboxylase, mitochondrial	17	5.91545	6.26476	5.77611	6.01781	6.73965	6.64564	6.131	6.36613	6.66949	6.58545	6.3327	6.59672	6.13893	5.8858	6.00587	5.92849	5.99353	6.47061	6.54609	5.98977	1.0796	1.09219	0.999373	0.110494	0.127227	-0.000905348	0.0343994	0.0427235	0.0224645	0.0185591
sp|Q9Y530|OARD1_HUMAN	OARD1	OARD1_HUMAN O-acetyl-ADP-ribose deacetylase 1	6	5.56938	6.24719	5.62893	6.42716	6.5058	7.02294	6.23969	6.48732	6.4971	7.3242	6.03096	6.22064	6.22939	5.70949	6.12336	5.73645	5.96816	6.56394	6.51823	5.94967	1.09983	1.09217	0.996901	0.137274	0.127192	-0.00447716	0.0725628	0.0501491	0.0875066	0.0446338
sp|Q9UIA9|XPO7_HUMAN	XPO7	XPO7_HUMAN Exportin-7	34	5.76859	6.41589	5.72583	6.00111	6.77604	6.82226	6.19223	6.49806	6.68042	6.46687	6.35851	6.60864	6.12433	5.82984	5.97411	5.75728	5.97786	6.57215	6.52861	5.92139	1.09942	1.09213	0.990554	0.136737	0.127148	-0.013692	0.0528755	0.0442701	0.0220548	0.0274531
sp|Q6ZS86|GLPK5_HUMAN	GK5	GLPK5_HUMAN Putative glycerol kinase 5	1	5.21666	7.35086	5.90516	5.73156	6.57615	6.82572	6.99088	6.14912	7.04021	6.78127	6.86882	5.74063	6.32978	5.9164	5.21344	5.36334	6.05106	6.63547	6.60773	5.70574	1.09658	1.092	0.942932	0.13301	0.126967	-0.0847739	0.151135	0.055206	0.0889847	0.0901309
sp|P26641|EF1G_HUMAN	EEF1G	EF1G_HUMAN Elongation factor 1-gamma	93	5.84332	6.47438	5.58813	5.8479	6.8508	7.1581	6.53929	6.70582	6.66297	6.53055	6.47323	6.27151	6.03517	5.73086	5.91277	5.37521	5.93843	6.8135	6.48456	5.7635	1.14736	1.09197	0.970543	0.198314	0.126928	-0.0431364	0.0635448	0.0385458	0.0250982	0.049878
sp|P49736|MCM2_HUMAN	MCM2	MCM2_HUMAN DNA replication licensing factor MCM2	73	5.92179	6.30655	5.77186	6.01713	6.73956	6.61646	6.30771	6.36337	6.78043	6.41151	6.54325	6.48942	6.31348	5.80402	6.03003	5.58344	6.00433	6.50678	6.55615	5.93274	1.08368	1.0919	0.988077	0.115939	0.126846	-0.0173047	0.0375322	0.0315476	0.0242518	0.0526773
sp|P54886|P5CS_HUMAN	ALDH18A1	P5CS_HUMAN Delta-1-pyrroline-5-carboxylate synthase	71	5.8395	6.33246	5.83997	6.01417	6.6128	6.79079	6.42422	6.56155	6.63981	6.37797	6.58983	6.62479	5.93206	5.71508	6.05124	5.65377	6.00652	6.59734	6.5581	5.83804	1.09836	1.09183	0.971949	0.135354	0.126747	-0.0410471	0.0386794	0.0229732	0.0185875	0.0317956
sp|Q7Z6J9|SEN54_HUMAN	TSEN54	SEN54_HUMAN tRNA-splicing endonuclease subunit Sen54	13	5.89813	6.20809	5.74209	6.22644	6.51504	6.66825	6.3504	6.38354	6.51409	6.38702	6.6126	6.77131	6.20927	5.9296	6.00849	5.57563	6.01869	6.47931	6.57125	5.93075	1.07653	1.09181	0.985389	0.106391	0.12672	-0.021235	0.0395601	0.0223238	0.0246856	0.0445819
sp|P11802|CDK4_HUMAN	CDK4	CDK4_HUMAN Cyclin-dependent kinase 4	9	5.62844	6.43049	5.55265	6.21596	6.75729	6.59912	6.5853	6.33783	6.83578	6.603	6.14808	6.42638	6.41228	5.87666	5.92986	5.66087	5.95688	6.56989	6.50331	5.96992	1.10291	1.09173	1.00219	0.14131	0.126616	0.00315289	0.0727043	0.0263726	0.0446175	0.0531022
sp|Q8WUA7|TB22A_HUMAN	TBC1D22A	TB22A_HUMAN TBC1 domain family member 22A	4	6.15276	6.39176	5.69652	6.16049	6.4441	6.67708	6.18315	6.13405	7.22488	6.49107	6.28434	6.6393	5.86856	5.78161	6.17702	5.69329	6.10038	6.3596	6.6599	5.88012	1.04249	1.09172	0.963894	0.0600352	0.1266	-0.0530541	0.0477319	0.0395658	0.0606323	0.0357935
sp|Q96SU4|OSBL9_HUMAN	OSBPL9	OSBL9_HUMAN Oxysterol-binding protein-related protein 9	16	5.98906	6.44009	5.60516	6.00595	6.60194	6.9438	6.43482	6.4194	6.78356	6.25313	6.5765	6.63198	6.11833	5.79735	5.81572	5.58321	6.01006	6.59999	6.56129	5.82865	1.09816	1.09172	0.969815	0.135083	0.126599	-0.0442182	0.0567776	0.0369175	0.0340336	0.0377579
sp|Q8NBS3|S4A11_HUMAN	SLC4A11	S4A11_HUMAN Sodium bicarbonate transporter-like protein 11	1	5.82461	6.57597	5.41913	6.35676	6.62625	6.6511	6.16124	5.95728	6.37477	6.65952	6.43775	6.92135	6.45904	5.78645	5.78464	6.00414	6.04412	6.34897	6.59835	6.00857	1.05044	1.0917	0.994118	0.0709903	0.126573	-0.00851063	0.0864681	0.0543209	0.0375178	0.0528417
sp|Q9C091|GRB1L_HUMAN	GREB1L	GRB1L_HUMAN GREB1-like protein	1	6.26479	5.9199	6.01155	5.57622	7.78038	7.82233	6.40592	6.80235	7.1703	6.40763	5.68395	6.69027	5.39144	4.75879	5.92709	5.3871	5.94311	7.20275	6.48804	5.36611	1.21195	1.09169	0.902911	0.277328	0.126563	-0.147344	0.0479186	0.0985896	0.0958171	0.0890235
sp|O15085-2|ARHGB_HUMAN	ARHGEF11	ARHGB_HUMAN Isoform 2 of Rho guanine nucleotide exchange factor 11	6	5.85384	6.41617	5.63082	6.23282	6.5132	6.63485	6.05935	6.24384	6.90071	6.40445	6.76715	6.27401	6.13295	5.96026	5.94694	6.02865	6.03341	6.36281	6.58658	6.0172	1.0546	1.09168	0.997313	0.0766898	0.126555	-0.00388191	0.0590347	0.040869	0.0448805	0.0141369
sp|Q15120-2|PDK3_HUMAN	PDK3	PDK3_HUMAN Isoform 2 of [Pyruvate dehydrogenase (acetyl-transferring)] kinase isozyme 3, mitochondrial	7	6.09938	6.66496	5.47012	5.93471	7.06154	6.81052	6.35726	6.6511	6.93659	6.53548	6.35689	6.5557	6.23624	5.49404	5.68616	5.14929	6.04229	6.72011	6.59616	5.64143	1.11218	1.09167	0.933658	0.153388	0.126531	-0.0990345	0.0816353	0.0439062	0.036976	0.0805656
sp|P35237|SPB6_HUMAN	SERPINB6	SPB6_HUMAN Serpin B6	21	5.92244	6.27752	5.92153	5.80733	6.42665	6.63531	6.46803	6.41176	6.76398	6.50069	6.48739	6.3682	6.23767	5.97156	6.09309	5.70684	5.98221	6.48544	6.53007	6.00229	1.08412	1.09158	1.00336	0.116527	0.12642	0.00483567	0.0341281	0.0158373	0.0255639	0.0374867
sp|Q6UB35|C1TM_HUMAN	MTHFD1L	C1TM_HUMAN Monofunctional C1-tetrahydrofolate synthase, mitochondrial	51	5.98925	6.54785	5.62065	5.79033	7.08632	7.03208	6.269	6.44303	6.78518	6.63757	6.3157	6.40262	6.14818	5.67654	5.76769	5.48802	5.98702	6.70761	6.53527	5.77011	1.12036	1.09157	0.96377	0.16396	0.126408	-0.0532399	0.0673276	0.0615343	0.0329046	0.0481191
sp|Q9NW15|ANO10_HUMAN	ANO10	ANO10_HUMAN Anoctamin-10	2	5.61158	6.08377	6.13045	5.957	6.31182	6.90233	6.15859	6.48357	7.33934	5.93158	6.77615	5.9108	6.19913	6.3914	5.66306	6.14943	5.9457	6.46408	6.48947	6.10076	1.08719	1.09146	1.02608	0.120598	0.126253	0.0371411	0.039439	0.0496452	0.107152	0.0507956
sp|Q15119|PDK2_HUMAN	PDK2	PDK2_HUMAN [Pyruvate dehydrogenase (acetyl-transferring)] kinase isozyme 2, mitochondrial	7	6.08622	6.40172	5.66002	6.09348	6.63915	6.56565	6.36113	6.01548	6.60188	6.3997	6.52526	6.93054	6.13197	5.98101	6.27579	5.33099	6.06036	6.39535	6.61435	5.92994	1.05528	1.09141	0.97848	0.0776204	0.126195	-0.031386	0.050281	0.0436618	0.0342701	0.0703286
sp|O95168|NDUB4_HUMAN	NDUFB4	NDUB4_HUMAN NADH dehydrogenase [ubiquinone] 1 beta subcomplex subunit 4	2	6.03947	6.8202	5.49505	5.73788	7.00214	6.89006	5.72171	6.14655	7.20998	6.77224	5.94589	6.36644	6.40918	5.77137	6.02262	5.64922	6.02315	6.44011	6.57364	5.9631	1.06923	1.0914	0.99003	0.0965683	0.126174	-0.0144563	0.0956548	0.0949014	0.0824543	0.0562736
sp|Q9H6U8-3|ALG9_HUMAN	ALG9	ALG9_HUMAN Isoform 3 of Alpha-1,2-mannosyltransferase ALG9	5	5.53235	5.96321	5.81529	6.47338	6.69857	6.29974	6.18041	6.38126	6.56904	6.23921	6.34938	6.79992	6.59443	5.65405	6.40518	6.04458	5.94606	6.38999	6.48939	6.17456	1.07466	1.09138	1.03843	0.103881	0.126149	0.0544029	0.066327	0.0346847	0.0382632	0.067252
sp|Q12874|SF3A3_HUMAN	SF3A3	SF3A3_HUMAN Splicing factor 3A subunit 3	31	5.72259	6.28589	5.70696	6.17929	6.72811	6.81376	6.34346	6.72547	6.63222	6.40921	6.51619	6.5205	6.10946	5.87496	5.98401	5.44792	5.97368	6.6527	6.51953	5.85409	1.11367	1.09138	0.97998	0.155319	0.126147	-0.0291763	0.050585	0.0315962	0.0139689	0.0490648
sp|P35250|RFC2_HUMAN	RFC2	RFC2_HUMAN Replication factor C subunit 2	20	5.73292	6.47712	5.82807	5.80379	6.58837	6.93597	6.37407	6.38185	6.73015	6.51108	6.39695	6.38122	6.36873	5.89382	6.02219	5.5737	5.96047	6.57006	6.50485	5.96461	1.10227	1.09133	1.00069	0.14048	0.126088	0.0010005	0.0581812	0.0400834	0.0247448	0.0551355
sp|Q8IWE5|PKHM2_HUMAN	PLEKHM2	PKHM2_HUMAN Pleckstrin homology domain-containing family M member 2	10	5.73224	5.86409	6.02858	6.23933	6.46773	6.5012	6.45451	6.42392	6.59652	6.55071	6.25487	6.64152	6.06703	6.08646	6.24922	5.84209	5.96606	6.46184	6.51091	6.0612	1.0831	1.09132	1.01595	0.115167	0.12608	0.022825	0.0366785	0.00495502	0.0268273	0.0276125
sp|Q15070|OXA1L_HUMAN	OXA1L	OXA1L_HUMAN Mitochondrial inner membrane protein OXA1L	10	6.01374	6.13895	5.65946	6.15789	6.48894	6.89355	6.0323	6.30809	6.86718	6.27397	6.63791	6.3799	6.45562	6.02068	6.12256	5.54927	5.99251	6.43072	6.53974	6.03703	1.07313	1.09132	1.00743	0.10182	0.126073	0.0106792	0.0385584	0.0561666	0.040748	0.0620308
sp|Q8NAN2|FA73A_HUMAN	FAM73A	FA73A_HUMAN Protein FAM73A	1	5.91582	6.85171	5.52007	5.88328	6.03902	7.01255	6.20009	6.16578	6.4995	6.28291	6.66774	6.92793	5.89139	5.7288	6.28096	6.13246	6.04272	6.35436	6.59452	6.0084	1.05157	1.09132	0.994321	0.0725487	0.12607	-0.00821663	0.0940596	0.0699091	0.0413115	0.0409426
sp|O95573|ACSL3_HUMAN	ACSL3	ACSL3_HUMAN Long-chain-fatty-acid--CoA ligase 3	34	5.86899	6.31013	5.71683	6.02722	6.65732	7.00207	5.91327	6.1869	6.89529	6.61316	6.30689	6.29081	6.27269	6.13808	6.10902	5.69133	5.98079	6.43989	6.52654	6.05278	1.07676	1.09125	1.01204	0.106699	0.125981	0.0172612	0.0423866	0.0752574	0.043991	0.0415171
sp|P20742|PZP_HUMAN	PZP	PZP_HUMAN Pregnancy zone protein	2	6.4003	5.78897	5.64378	6.11387	6.41964	6.53293	5.87798	6.43566	6.01051	6.69986	6.60453	6.81425	6.34987	6.33338	5.97587	5.99861	5.98673	6.31655	6.53229	6.16443	1.05509	1.09113	1.02968	0.0773692	0.12582	0.0421999	0.0565567	0.0469617	0.0548447	0.0332432
sp|P67812|SC11A_HUMAN	SEC11A	SC11A_HUMAN Signal peptidase complex catalytic subunit SEC11A	8	5.82392	6.52278	5.46766	6.20182	6.72911	6.71165	5.97868	6.32021	6.56924	6.40671	5.9949	7.23356	6.2352	6.05409	5.90263	5.84785	6.00404	6.43491	6.5511	6.00994	1.07176	1.09111	1.00098	0.0999857	0.125803	0.0014164	0.0762251	0.0556303	0.078643	0.0288965
sp|P33176|KINH_HUMAN	KIF5B	KINH_HUMAN Kinesin-1 heavy chain	67	5.95242	6.34582	5.61421	5.99685	6.58558	6.67415	6.4682	6.43437	6.76248	6.4679	6.44951	6.40703	6.31954	5.85034	6.17631	5.49528	5.97733	6.54058	6.52173	5.96037	1.09423	1.09108	0.997163	0.129917	0.125755	-0.0040987	0.0500633	0.0168379	0.0249185	0.061572
sp|Q8IYH5|ZZZ3_HUMAN	ZZZ3	ZZZ3_HUMAN ZZ-type zinc finger-containing protein 3	6	5.83246	6.39231	5.60787	6.16489	6.5328	6.91312	6.09642	6.59826	6.44589	6.64033	6.69694	6.39976	6.02934	5.97418	6.0427	5.63273	5.99938	6.53515	6.54573	5.91974	1.0893	1.09107	0.986724	0.123406	0.12574	-0.0192808	0.0579755	0.0514633	0.0221543	0.0327081
sp|Q8IWT6|LRC8A_HUMAN	LRRC8A	LRC8A_HUMAN Leucine-rich repeat-containing protein 8A	12	5.69606	6.34539	5.78309	6.10803	6.77773	6.69097	5.88234	6.35243	6.63381	6.56314	6.54021	6.37463	6.36296	5.95846	6.04059	5.89016	5.98314	6.42587	6.52795	6.06304	1.074	1.09106	1.01335	0.102988	0.125726	0.0191385	0.0500719	0.0632073	0.0168046	0.0345024
sp|Q9NU22|MDN1_HUMAN	MDN1	MDN1_HUMAN Midasin	52	5.80276	6.36034	5.72797	6.07111	6.5532	6.75025	6.22659	6.32502	6.56555	6.51363	6.42369	6.64107	6.28395	5.94719	6.03606	5.77161	5.99055	6.46377	6.53599	6.0097	1.07899	1.09105	1.0032	0.109687	0.125717	0.00460631	0.0479419	0.0363455	0.0139743	0.0354941
sp|Q6ZT07|TBCD9_HUMAN	TBC1D9	TBCD9_HUMAN TBC1 domain family member 9	8	5.84562	6.58489	5.83121	5.72185	6.77782	7.42042	6.77893	6.38279	6.49066	6.66894	6.56338	6.44308	5.56678	5.71114	5.83602	5.37645	5.99589	6.83999	6.54152	5.6226	1.14078	1.091	0.937742	0.19002	0.12565	-0.0927377	0.0661344	0.0627989	0.0150277	0.0351373
sp|O95479|G6PE_HUMAN	H6PD	G6PE_HUMAN GDH/6PGL endoplasmic bifunctional protein	6	5.77281	6.18311	5.90874	5.81576	6.48103	6.83355	6.43627	6.65873	6.42728	6.64108	6.29559	6.47004	6.1144	6.16513	6.21759	5.5789	5.92011	6.60239	6.4585	6.01901	1.11525	1.09094	1.01671	0.157367	0.125576	0.0239023	0.0311289	0.0275048	0.0220756	0.0492461
sp|Q9Y2P4|S27A6_HUMAN	SLC27A6	S27A6_HUMAN Long-chain fatty acid transport protein 6	12	6.0547	6.17254	5.58426	6.07016	6.2038	6.45705	6.22828	6.20325	7.03505	6.15592	6.3043	6.55804	6.46399	6.12746	6.22256	6.15864	5.97041	6.2731	6.51333	6.24316	1.0507	1.09093	1.04568	0.0713462	0.125564	0.0644458	0.0439992	0.019638	0.0591728	0.0244183
sp|Q9H223|EHD4_HUMAN	EHD4	EHD4_HUMAN EH domain-containing protein 4	30	5.85907	6.39849	5.79013	5.99858	6.58202	6.78286	6.08037	6.32063	6.56946	6.51484	6.48811	6.66023	6.30303	5.91523	6.07904	5.65791	6.01157	6.44147	6.55816	5.9888	1.07151	1.09092	0.996213	0.0996487	0.12555	-0.00547366	0.0452681	0.0475376	0.0115892	0.045401
sp|Q9BVC4|LST8_HUMAN	MLST8	LST8_HUMAN Target of rapamycin complex subunit LST8	5	5.79226	5.87538	5.79596	6.43247	6.29088	6.42266	5.5804	6.20384	6.753	6.06342	6.22939	7.02202	6.22546	6.55461	5.92828	6.82997	5.97402	6.12444	6.51696	6.38458	1.02518	1.09088	1.06872	0.0358776	0.125497	0.0958903	0.0515617	0.0610153	0.068577	0.0613859
sp|Q16566|KCC4_HUMAN	CAMK4	KCC4_HUMAN Calcium/calmodulin-dependent protein kinase type IV	4	5.82772	6.27159	5.75695	6.09614	6.6864	6.61141	5.81808	6.36241	6.56834	6.96292	6.03437	6.56273	6.07009	6.3807	5.95231	6.03783	5.9881	6.36958	6.53209	6.11023	1.06371	1.09085	1.0204	0.0890988	0.125446	0.029129	0.0398925	0.0616805	0.0583348	0.03061
sp|Q15046|SYK_HUMAN	KARS	SYK_HUMAN Lysine--tRNA ligase	52	5.77026	6.41265	5.53581	5.97066	6.7719	7.03921	6.29206	6.56606	6.64298	6.47833	6.41057	6.3073	6.32046	5.86693	5.97597	5.63885	5.92234	6.66731	6.45979	5.95055	1.12579	1.09075	1.00476	0.170936	0.12532	0.00685509	0.0628221	0.0474543	0.0218154	0.0476932
sp|P53597|SUCA_HUMAN	SUCLG1	SUCA_HUMAN Succinyl-CoA ligase [ADP/GDP-forming] subunit alpha, mitochondrial	22	5.77028	6.25001	5.77037	6.19405	6.48284	6.40426	6.56838	6.44191	6.4771	6.18742	6.69785	6.79727	6.13541	5.73477	6.38954	5.69854	5.99618	6.47435	6.53991	5.98957	1.07975	1.09068	0.998897	0.110692	0.125228	-0.00159186	0.0436596	0.0108774	0.0413485	0.0554461
sp|Q8TED1|GPX8_HUMAN	GPX8	GPX8_HUMAN Probable glutathione peroxidase 8	9	5.73623	6.61609	5.65121	6.26137	6.42887	6.69665	6.16693	6.51477	6.53448	6.46514	6.66151	6.80144	6.01114	5.90393	6.03467	5.51558	6.06622	6.45181	6.61564	5.86633	1.06356	1.09057	0.967048	0.0889038	0.125082	-0.0483408	0.0750352	0.0341452	0.0223969	0.0410235
sp|Q9P0V3|SH3B4_HUMAN	SH3BP4	SH3B4_HUMAN SH3 domain-binding protein 4	5	5.71321	6.44361	6.06031	5.97065	6.15345	6.62697	5.85553	6.25369	6.46571	6.50795	6.86471	6.53966	6.37793	6.44503	6.10697	5.61462	6.04695	6.22241	6.59451	6.13614	1.02902	1.09055	1.01475	0.041267	0.125058	0.0211244	0.0500438	0.0511588	0.0276994	0.0614625
sp|Q8NEZ5|FBX22_HUMAN	FBXO22	FBX22_HUMAN F-box only protein 22	17	5.95136	6.17238	5.82762	5.95013	6.68166	6.59983	6.64811	6.42742	6.67898	6.29821	6.6124	6.47607	6.14143	5.8027	6.18728	5.54443	5.97537	6.58925	6.51642	5.91896	1.10274	1.09055	0.990559	0.141087	0.12505	-0.0136849	0.0240307	0.0171487	0.0258129	0.0511775
sp|P98198-3|AT8B2_HUMAN	ATP8B2	AT8B2_HUMAN Isoform 3 of Probable phospholipid-transporting ATPase ID	1	6.10568	4.60833	7.12387	5.70501	6.01236	6.71577	6.64747	6.56658	6.83961	6.46743	6.85166	5.51581	7.29321	6.78164	5.08439	5.68118	5.88572	6.48555	6.41863	6.21011	1.10191	1.09054	1.05511	0.140008	0.125045	0.0773981	0.176725	0.0495404	0.097801	0.162278
sp|Q9UDR5|AASS_HUMAN	AASS	AASS_HUMAN Alpha-aminoadipic semialdehyde synthase, mitochondrial	5	5.68778	6.34683	5.68649	6.18225	6.54705	6.66008	6.01608	6.00641	6.01523	6.61142	6.59701	6.84336	6.06815	6.22478	6.41358	6.09348	5.97584	6.3074	6.51675	6.2	1.05548	1.09052	1.03751	0.0779057	0.125013	0.0531267	0.0569073	0.0547131	0.0541516	0.0254957
sp|Q13144|EI2BE_HUMAN	EIF2B5	EI2BE_HUMAN Translation initiation factor eIF-2B subunit epsilon	12	5.75148	6.55345	5.86022	5.9354	6.37276	6.82984	6.20693	6.52396	6.53089	6.53184	6.51705	6.701	6.16934	5.91504	6.04556	5.55526	6.02514	6.48337	6.5702	5.9213	1.07605	1.09046	0.982766	0.10575	0.124942	-0.0250802	0.0597845	0.0408415	0.0133124	0.044787
sp|P23610|F8I2_HUMAN	F8A1	F8I2_HUMAN Factor VIII intron 22 protein	3	5.92744	6.9538	5.62014	6.18153	5.97786	7.12338	6.28441	5.51271	6.49924	7.30608	7.28813	5.8222	5.40307	5.88163	5.86134	6.35702	6.17073	6.22459	6.72891	5.87576	1.00873	1.09046	0.9522	0.0125382	0.124933	-0.0706639	0.0924168	0.108923	0.105808	0.0663008
sp|P52565|GDIR1_HUMAN	ARHGDIA	GDIR1_HUMAN Rho GDP-dissociation inhibitor 1	20	6.06148	6.31478	6.14873	5.71601	6.43136	7.05619	7.03031	6.85402	5.92859	7.45204	7.03833	6.01204	5.05585	5.79575	5.92288	5.18163	6.06025	6.84297	6.60775	5.48903	1.12916	1.09034	0.905743	0.175245	0.124782	-0.142827	0.0416484	0.0421944	0.114403	0.0790231
sp|P48200|IREB2_HUMAN	IREB2	IREB2_HUMAN Iron-responsive element-binding protein 2	24	6.06877	6.37068	5.80736	5.9692	6.69366	6.56044	6.30167	6.24049	6.89951	6.27509	6.56316	6.6654	6.19175	5.63891	6.19648	5.55743	6.054	6.44907	6.60079	5.89614	1.06526	1.09032	0.973925	0.0912007	0.124749	-0.0381179	0.0391499	0.0331918	0.0392047	0.0586279
sp|Q53FZ2|ACSM3_HUMAN	ACSM3	ACSM3_HUMAN Acyl-coenzyme A synthetase ACSM3, mitochondrial	10	5.7589	6.15939	5.93225	6.24522	6.71901	6.50309	6.45933	6.15483	6.74229	6.51203	6.45907	6.55768	6.33682	6.03257	5.71372	5.71381	6.02394	6.45906	6.56777	5.94923	1.07223	1.09028	0.987598	0.100618	0.124696	-0.0180044	0.036617	0.0359848	0.0187473	0.0502451
sp|P56192|SYMC_HUMAN	MARS	SYMC_HUMAN Methionine--tRNA ligase, cytoplasmic	46	5.92024	6.43386	5.58001	5.89705	6.71756	6.75831	6.13422	6.40116	6.84299	6.4158	6.2474	6.47623	6.39815	5.90431	6.06561	5.80711	5.95779	6.50281	6.49561	6.04379	1.09148	1.09027	1.01444	0.126287	0.124687	0.0206775	0.0593003	0.0450611	0.0386439	0.0428833
sp|Q9UIU6|SIX4_HUMAN	SIX4	SIX4_HUMAN Homeobox protein SIX4	10	5.98132	6.06645	5.8907	6.01809	6.58663	6.64776	6.74268	6.2366	6.56694	6.5045	6.79604	6.25161	5.58053	6.15855	6.13205	5.83955	5.98914	6.55342	6.52977	5.92767	1.09422	1.09027	0.989736	0.129899	0.124684	-0.0148837	0.0124077	0.0336853	0.0342776	0.0460306
sp|Q8N1S5|S39AB_HUMAN	SLC39A11	S39AB_HUMAN Zinc transporter ZIP11	2	5.67443	6.56587	5.85756	5.52278	6.77439	7.01548	6.26688	6.5654	6.26283	6.29377	6.56114	6.63375	6.31882	5.82064	5.89878	5.96747	5.90516	6.65554	6.43787	6.00143	1.12707	1.09021	1.0163	0.172579	0.124608	0.0233296	0.0781096	0.0477397	0.0290553	0.0366468
sp|Q96DU7|IP3KC_HUMAN	ITPKC	IP3KC_HUMAN Inositol-trisphosphate 3-kinase C	3	5.85167	6.7269	5.49013	5.23076	6.46882	7.10555	6.48945	6.58588	6.15439	6.35464	6.73484	6.1565	6.29546	6.47421	6.29332	5.58748	5.82486	6.66242	6.35009	6.16262	1.14379	1.09017	1.05798	0.193823	0.124553	0.0813186	0.112113	0.0449971	0.0430147	0.0637204
sp|O15091|MRRP3_HUMAN	KIAA0391	MRRP3_HUMAN Mitochondrial ribonuclease P protein 3	14	5.85951	6.58976	5.46378	5.92746	6.73503	7.17238	6.05949	6.48047	6.68385	6.66306	6.2388	6.40432	6.2375	5.91287	5.9323	5.63941	5.96013	6.61184	6.49751	5.93052	1.10935	1.09016	0.995032	0.149709	0.124543	-0.00718458	0.0783374	0.0704937	0.0329784	0.0412223
sp|Q9UBI1|COMD3_HUMAN	COMMD3	COMD3_HUMAN COMM domain-containing protein 3	8	5.93073	6.43393	5.88762	6.057	6.31783	6.58609	6.09827	6.68443	6.88316	6.47803	6.91157	6.22711	6.0226	6.2722	5.70644	5.50299	6.07732	6.42165	6.62497	5.87606	1.05666	1.09011	0.966883	0.0795099	0.124478	-0.0485867	0.0408678	0.0413422	0.0499627	0.0578246
sp|P51617|IRAK1_HUMAN	IRAK1	IRAK1_HUMAN Interleukin-1 receptor-associated kinase 1	5	5.61998	6.3071	5.87902	6.11272	6.68867	6.46709	5.96337	6.81548	6.67483	6.48551	6.55024	6.36353	6.21429	5.88914	5.92322	6.04581	5.97971	6.48365	6.51853	6.01811	1.08428	1.09011	1.00642	0.116732	0.124472	0.00923736	0.0496486	0.0579224	0.0199137	0.0244384
sp|O43427|FIBP_HUMAN	FIBP	FIBP_HUMAN Acidic fibroblast growth factor intracellular-binding protein	9	5.76716	6.14182	5.98968	6.19735	6.45809	6.48025	6.16658	6.50832	6.67119	6.61056	6.22523	6.75977	6.42928	5.90204	6.17033	5.52236	6.024	6.40331	6.56669	6.006	1.06297	1.09009	0.997012	0.0880955	0.124443	-0.00431729	0.0319422	0.0248548	0.0358993	0.0645486
tr|H0Y3R8|H0Y3R8_HUMAN	TJP1	H0Y3R8_HUMAN Tight junction protein ZO-1 (Fragment)	1	5.65678	7.19428	5.35004	6.44233	6.45042	6.70419	6.33039	5.07569	6.50107	6.90139	6.42404	7.03681	5.85562	5.88524	5.35288	6.83884	6.16086	6.14017	6.71583	5.98315	0.996643	1.09008	0.971155	-0.00485198	0.124434	-0.0422271	0.134461	0.118329	0.0445649	0.103719
sp|Q92990|GLMN_HUMAN	GLMN	GLMN_HUMAN Glomulin	14	5.77662	6.16012	5.86328	5.97082	6.6033	6.86262	6.38179	6.47216	6.63927	6.51369	6.28424	6.47381	6.3985	5.85933	6.02696	5.71349	5.94271	6.57997	6.47775	5.99957	1.10723	1.09003	1.00957	0.146959	0.124372	0.0137381	0.0278122	0.0317983	0.0226957	0.0492012
sp|Q7Z406-2|MYH14_HUMAN	MYH14	MYH14_HUMAN Isoform 2 of Myosin-14	90	5.87394	6.30208	5.73635	5.99313	6.43338	6.4649	6.31096	6.45776	6.53353	7.01942	6.28491	6.21744	6.09514	6.05233	6.29911	5.92563	5.97638	6.41675	6.51382	6.09305	1.07369	1.08993	1.01952	0.102572	0.124234	0.0278945	0.0403516	0.0111904	0.0557948	0.0254525
sp|Q96S44|PRPK_HUMAN	TP53RK	PRPK_HUMAN TP53-regulating kinase	9	5.84756	6.54019	5.51364	5.8094	6.74285	7.16473	6.17494	6.52345	6.84336	6.66896	6.01168	6.31895	6.448	5.96884	5.7967	5.62676	5.9277	6.65149	6.46074	5.96008	1.1221	1.08992	1.00546	0.166206	0.124227	0.00785866	0.0733411	0.0623063	0.0573257	0.0593944
sp|Q9BVC3|DCC1_HUMAN	DSCC1	DCC1_HUMAN Sister chromatid cohesion protein DCC1	15	5.76662	6.1803	5.85897	6.07045	6.67872	6.5564	6.5985	6.44298	6.52311	6.39495	6.54258	6.56226	6.30131	5.85674	5.95346	5.71266	5.96908	6.56915	6.50572	5.95604	1.10053	1.0899	0.997815	0.138197	0.1242	-0.00315575	0.0317871	0.0149535	0.0116144	0.042065
sp|Q8WVB6|CTF18_HUMAN	CHTF18	CTF18_HUMAN Chromosome transmission fidelity protein 18 homolog	8	5.91351	6.44979	5.78381	6.01795	6.40892	7.24965	6.00256	6.35263	6.50618	6.53424	6.40644	6.88852	6.23672	6.22207	5.74725	5.27975	6.04126	6.50344	6.58385	5.87145	1.0765	1.08981	0.97189	0.106352	0.12408	-0.0411345	0.0477878	0.081335	0.0319555	0.0775446
sp|Q7L1T6|NB5R4_HUMAN	CYB5R4	NB5R4_HUMAN Cytochrome b5 reductase 4	8	6.01206	5.7697	6.21075	6.2582	6.30584	6.56653	6.49074	6.43934	6.7364	6.42288	6.6302	6.63865	6.17351	5.81556	5.87186	5.65779	6.06268	6.45061	6.60703	5.87968	1.06399	1.08979	0.969816	0.0894811	0.124047	-0.0442174	0.0367041	0.0170134	0.019962	0.0367073
sp|Q643R3|LPCT4_HUMAN	LPCAT4	LPCT4_HUMAN Lysophospholipid acyltransferase LPCAT4	9	5.67492	6.36133	5.65012	6.0154	6.19283	6.64253	6.5385	6.49197	6.55945	6.17719	6.50258	6.59055	6.17549	6.14675	6.32163	5.95877	5.92544	6.46646	6.45744	6.15066	1.0913	1.08978	1.03801	0.126053	0.12404	0.0538183	0.0565341	0.029842	0.029478	0.0242398
sp|Q6P1A2|MBOA5_HUMAN	LPCAT3	MBOA5_HUMAN Lysophospholipid acyltransferase 5	7	5.67865	6.12692	6.12837	6.4447	6.34271	6.59621	6.258	6.08961	6.52038	6.62645	6.69647	6.72328	6.11851	5.80899	5.70487	6.13586	6.09466	6.32163	6.64164	5.94206	1.03724	1.08975	0.974961	0.0527514	0.123995	-0.0365832	0.0516928	0.0333971	0.013636	0.0366989
sp|Q9UJA3-4|MCM8_HUMAN	MCM8	MCM8_HUMAN Isoform 4 of DNA helicase MCM8	3	5.7729	7.16767	5.0136	5.83409	6.69272	7.49782	6.48723	6.85342	6.61829	7.28203	6.32863	5.6925	6.23872	5.68564	5.59544	5.23931	5.94707	6.8828	6.48036	5.68978	1.15734	1.08967	0.956737	0.210817	0.123897	-0.0638056	0.150534	0.0634258	0.101793	0.0726904
sp|O60906|NSMA_HUMAN	SMPD2	NSMA_HUMAN Sphingomyelin phosphodiesterase 2	4	6.151	6.25382	5.58503	6.04766	6.73	6.76775	6.3385	5.66077	6.39246	6.83841	6.61343	6.34762	6.19712	5.88298	6.24032	5.95314	6.00938	6.37425	6.54798	6.06839	1.06072	1.08963	1.00982	0.0850412	0.123834	0.0140983	0.0491154	0.0805933	0.0344847	0.0291371
sp|P27361|MK03_HUMAN	MAPK3	MK03_HUMAN Mitogen-activated protein kinase 3	24	5.7738	6.24583	5.90098	6.12073	6.61185	6.73598	6.60999	6.55091	6.63856	6.42502	6.65775	6.47296	6.05654	5.7641	5.83707	5.59795	6.01033	6.62718	6.54857	5.81392	1.10263	1.08955	0.96732	0.14095	0.123735	-0.0479354	0.0353667	0.0117481	0.0178519	0.0327142
sp|O75923-13|DYSF_HUMAN	DYSF	DYSF_HUMAN Isoform 13 of Dysferlin	4	6.0239	6.16111	5.4564	5.88268	6.88923	6.39258	6.286	6.68558	6.26609	6.1386	6.71279	6.51263	6.70445	5.73782	6.43692	5.71321	5.88102	6.56335	6.40753	6.1481	1.11602	1.08953	1.04541	0.158365	0.123701	0.0640736	0.0518706	0.0419315	0.039948	0.0813477
sp|Q00610|CLH1_HUMAN	CLTC	CLH1_HUMAN Clathrin heavy chain 1	242	5.86372	6.396	5.72636	6.04007	6.58261	6.63191	6.32291	6.40572	6.54788	6.58478	6.51694	6.5262	6.12779	5.93571	6.06169	5.72974	6.00654	6.48579	6.54395	5.96373	1.07979	1.08947	0.992874	0.110748	0.123628	-0.010318	0.0482235	0.0224611	0.00460737	0.0293717
sp|Q8N8R3|MCATL_HUMAN	SLC25A29	MCATL_HUMAN Mitochondrial carnitine/acylcarnitine carrier protein CACL	5	5.76561	7.10349	5.56091	5.51027	6.84382	7.12153	6.52243	6.39808	6.37236	6.50445	6.6397	6.56555	5.98515	5.8184	5.85882	5.42942	5.98507	6.72147	6.52051	5.77295	1.12304	1.08946	0.964558	0.167408	0.123618	-0.05206	0.125937	0.0485308	0.0173602	0.0415348
sp|O15533-3|TPSN_HUMAN	TAPBP	TPSN_HUMAN Isoform 3 of Tapasin	4	5.95487	6.21984	6.7489	5.32721	6.35517	6.68796	6.73661	5.88551	6.39763	6.83441	6.81454	6.37349	5.92924	6.41606	6.03398	5.28459	6.06271	6.41631	6.60502	5.91597	1.05833	1.08945	0.975797	0.0817828	0.123601	-0.0353475	0.0974949	0.0611526	0.0384146	0.079454
sp|P06746|DPOLB_HUMAN	POLB	DPOLB_HUMAN DNA polymerase beta	17	6.07763	6.16397	5.50945	6.08375	6.67656	6.54693	6.263	6.17053	6.72591	6.33733	6.35671	6.54683	6.55523	6.0477	6.27217	5.6663	5.9587	6.41425	6.49169	6.13535	1.07645	1.08945	1.02965	0.106284	0.123598	0.042148	0.0506943	0.0369686	0.0281167	0.0611816
sp|Q9BVG9|PTSS2_HUMAN	PTDSS2	PTSS2_HUMAN Phosphatidylserine synthase 2	3	5.50806	6.57044	6.10808	6.10682	6.24999	6.95574	6.4311	6.57861	6.56698	6.43159	6.64146	6.82442	5.74657	5.95152	5.81698	5.51165	6.07335	6.55386	6.61611	5.75668	1.07912	1.08937	0.947859	0.109852	0.123491	-0.0772555	0.0717065	0.0457344	0.0247586	0.03199
sp|Q9H160|ING2_HUMAN	ING2	ING2_HUMAN Inhibitor of growth protein 2	2	6.3386	5.79313	5.99069	6.41243	6.37608	6.00933	5.94167	5.84708	6.64565	6.22868	7.27797	6.575	6.44654	6.54734	6.0169	5.55291	6.13371	6.04354	6.68182	6.14092	0.985299	1.08936	1.00118	-0.0213667	0.123482	0.00169485	0.0476357	0.0382995	0.0654322	0.0740121
sp|Q9NVE7|PANK4_HUMAN	PANK4	PANK4_HUMAN Pantothenate kinase 4	18	5.80563	6.26316	5.78463	6.18292	6.58859	7.01945	6.16184	6.4022	6.5928	6.56697	6.5084	6.51607	6.16655	5.88407	5.94543	5.61128	6.00908	6.54302	6.54606	5.90183	1.08885	1.08936	0.982152	0.122811	0.123481	-0.0259824	0.0414978	0.0554006	0.00619872	0.0387261
sp|Q96JG6|CC132_HUMAN	CCDC132	CC132_HUMAN Coiled-coil domain-containing protein 132	14	5.92152	6.3277	5.73779	6.34948	6.4455	6.64259	6.04361	6.38622	6.5967	6.51452	6.67628	6.72247	6.01851	6.0322	5.71468	5.87023	6.08412	6.37948	6.62749	5.9089	1.04855	1.08931	0.971201	0.0683896	0.123414	-0.0421584	0.0498653	0.0390772	0.0138048	0.0251842
sp|Q13619|CUL4A_HUMAN	CUL4A	CUL4A_HUMAN Cullin-4A	24	6.04994	6.24054	5.8004	5.91902	6.81474	6.93499	6.23016	6.36177	6.6659	6.50744	6.41772	6.56308	6.37107	5.85285	5.79368	5.47668	6.00247	6.58541	6.53853	5.87357	1.09712	1.08931	0.978525	0.133717	0.12341	-0.0313198	0.0314229	0.0519421	0.0158909	0.0630814
sp|Q12768|STRUM_HUMAN	KIAA0196	STRUM_HUMAN WASH complex subunit strumpellin	18	5.80447	6.41692	5.85481	6.14979	6.5225	6.80298	6.26072	6.43792	6.66388	6.51663	6.65805	6.5482	5.93922	5.81219	5.94611	5.6656	6.0565	6.50603	6.59669	5.84078	1.07422	1.08919	0.964382	0.103294	0.123259	-0.0523227	0.0469727	0.0347414	0.0114249	0.0226037
sp|O00203|AP3B1_HUMAN	AP3B1	AP3B1_HUMAN AP-3 complex subunit beta-1	53	5.92094	6.25599	5.68576	5.92918	6.72378	7.06818	6.23802	6.45183	6.6872	6.54233	6.27162	6.41238	6.15003	6.06889	5.89276	5.70111	5.94797	6.62045	6.47838	5.9532	1.11306	1.08918	1.00088	0.154533	0.123237	0.00126799	0.0393946	0.0541685	0.0274397	0.0335013
tr|E5RG31|E5RG31_HUMAN	MCM4	E5RG31_HUMAN DNA replication licensing factor MCM4 (Fragment)	1	7.35607	6.22485	5.07934	5.6674	6.50747	7.07566	6.45854	4.75381	8.34571	7.06978	5.27327	5.80808	6.28755	7.34978	5.99577	4.74693	6.08192	6.19887	6.62421	6.09501	1.01923	1.08917	1.00215	0.0274796	0.123223	0.00310234	0.159438	0.161846	0.20723	0.175655
sp|O95487|SC24B_HUMAN	SEC24B	SC24B_HUMAN Protein transport protein Sec24B	21	5.82801	6.44894	5.65387	5.97402	6.41229	6.76008	6.37809	6.42511	6.61311	6.53665	6.48291	6.40278	6.27184	6.03194	5.81758	5.96277	5.97621	6.49389	6.50886	6.02103	1.08662	1.08913	1.0075	0.119853	0.123175	0.0107801	0.0571006	0.0274973	0.0136171	0.0314847
tr|M0QZ21|M0QZ21_HUMAN	AP2S1	M0QZ21_HUMAN AP-2 complex subunit sigma	1	7.37258	6.17196	5.4457	4.89582	6.17135	6.43831	6.53991	5.36761	7.65763	5.94439	6.35461	6.05801	6.18628	6.5672	7.16806	5.66059	5.97152	6.12929	6.50366	6.39553	1.02642	1.08911	1.07101	0.0376241	0.123155	0.0989675	0.179238	0.0866405	0.121241	0.0993094
sp|Q9NWR8|MCUB_HUMAN	CCDC109B	MCUB_HUMAN Mitochondrial calcium uniporter regulatory subunit MCUb	2	5.4868	6.09721	6.116	6.17725	6.6104	6.51061	5.65768	6.31439	6.8574	6.18455	6.23374	6.72932	6.24407	6.40318	6.32222	6.05517	5.96931	6.27327	6.50125	6.25616	1.05092	1.08911	1.04805	0.0716523	0.123152	0.067712	0.0541916	0.0682928	0.0525923	0.023802
sp|Q5SQI0|ATAT_HUMAN	ATAT1	ATAT_HUMAN Alpha-tubulin N-acetyltransferase	2	5.94192	6.6169	5.55171	5.73066	6.5591	6.74476	6.12719	6.54626	6.71815	6.81822	6.46013	5.96874	6.64726	6.2375	5.88514	5.44633	5.9603	6.49433	6.49131	6.05406	1.0896	1.08909	1.01573	0.123796	0.123125	0.022518	0.0781644	0.0401924	0.0584842	0.0844085
sp|Q9HAY2|MAGF1_HUMAN	MAGEF1	MAGF1_HUMAN Melanoma-associated antigen F1	1	6.36281	5.49481	5.72545	8.17159	6.72645	5.32733	4.85045	6.93731	6.45623	7.82272	7.43272	6.33654	5.90915	6.42004	5.3816	4.64481	6.43867	5.96038	7.01205	5.5889	0.925718	1.08905	0.868022	-0.111356	0.123075	-0.204197	0.18827	0.17257	0.104129	0.135781
sp|Q9Y673|ALG5_HUMAN	ALG5	ALG5_HUMAN Dolichyl-phosphate beta-glucosyltransferase	9	6.16082	6.4868	5.90376	6.26404	6.31273	6.48223	6.02116	6.21033	6.73649	6.8348	6.83543	6.61802	6.3027	5.78327	5.61246	5.43497	6.20386	6.25661	6.75619	5.78335	1.0085	1.08903	0.932219	0.0122168	0.123044	-0.10126	0.0389966	0.0308315	0.0152717	0.0647199
sp|A6NFI3|ZN316_HUMAN	ZNF316	ZN316_HUMAN Zinc finger protein 316	1	5.62953	5.99748	6.16796	6.37684	5.95774	6.32559	6.80164	5.47241	6.37453	7.49454	6.04919	6.40546	6.46798	6.39382	6.89835	5.18695	6.04295	6.13934	6.58093	6.23677	1.01595	1.08903	1.03207	0.0228311	0.123038	0.0455466	0.0523382	0.0917131	0.095736	0.11775
sp|Q9UMR2|DD19B_HUMAN	DDX19B	DD19B_HUMAN ATP-dependent RNA helicase DDX19B	28	6.02694	6.38559	5.65739	5.95964	6.88862	7.01894	6.27395	6.28164	6.86237	6.67748	6.31177	6.31619	6.09729	5.9173	5.81681	5.50806	6.00739	6.61579	6.54195	5.83487	1.10127	1.08898	0.971281	0.139175	0.122983	-0.042039	0.0497715	0.0595397	0.0418612	0.0423043
sp|P33121|ACSL1_HUMAN	ACSL1	ACSL1_HUMAN Long-chain-fatty-acid--CoA ligase 1	17	5.6919	5.98232	6.08825	6.36162	6.49291	6.42639	6.14515	6.26337	6.61097	6.61465	6.48163	6.55808	6.27344	6.14452	5.9597	5.9051	6.03102	6.33196	6.56633	6.07069	1.0499	1.08876	1.00658	0.0702484	0.122685	0.00945789	0.0459051	0.0248748	0.00945753	0.0279383
sp|Q9BSJ8|ESYT1_HUMAN	ESYT1	ESYT1_HUMAN Extended synaptotagmin-1	36	5.85925	6.3629	5.73689	6.07358	6.46722	6.9607	6.57868	6.57265	6.61744	6.60148	6.51844	6.42492	6.10796	5.71718	5.95223	5.44849	6.00815	6.64481	6.54057	5.80647	1.10597	1.08862	0.966431	0.145306	0.122494	-0.0492619	0.0456708	0.0326152	0.0135272	0.0495433
sp|Q9UBF2|COPG2_HUMAN	COPG2	COPG2_HUMAN Coatomer subunit gamma-2	18	5.94425	6.43422	5.7452	6.0595	6.79259	6.82566	6.04585	6.31198	6.87831	6.4173	6.50805	6.5225	6.0707	5.88998	5.87303	5.68089	6.04579	6.49402	6.58154	5.87865	1.07414	1.08861	0.972354	0.10318	0.122494	-0.0404466	0.0479131	0.0585102	0.0308821	0.0271021
sp|Q15714-2|T22D1_HUMAN	TSC22D1	T22D1_HUMAN Isoform 2 of TSC22 domain family protein 1	1	5.66187	6.51559	4.64726	6.52038	4.55125	5.85351	7.27049	6.68968	4.80113	7.35092	6.39448	6.86704	5.09354	6.41164	7.93246	7.43875	5.83627	6.09123	6.35339	6.7191	1.04368	1.0886	1.15126	0.0616863	0.122479	0.20322	0.152409	0.193713	0.17409	0.186821
sp|Q96BJ8-3|ELMO3_HUMAN	ELMO3	ELMO3_HUMAN Isoform 3 of Engulfment and cell motility protein 3	14	5.86559	6.93444	5.39474	5.93589	6.70177	7.10846	6.16839	6.48208	6.88696	6.48687	6.3146	6.57737	6.10334	5.75429	5.81541	5.4698	6.03266	6.61517	6.56645	5.78571	1.09656	1.08848	0.959064	0.132984	0.122318	-0.0603015	0.107318	0.0597166	0.036529	0.0449114
sp|Q9H999|PANK3_HUMAN	PANK3	PANK3_HUMAN Pantothenate kinase 3	5	6.15314	6.14847	5.28155	6.51315	6.88257	6.8566	6.58597	6.49803	7.3121	6.18513	6.27865	6.45202	6.12874	5.54442	5.878	5.30144	6.02408	6.70579	6.55698	5.71315	1.11317	1.08846	0.948386	0.154668	0.12229	-0.0764539	0.0869284	0.0287513	0.0786059	0.0637429
sp|O15397|IPO8_HUMAN	IPO8	IPO8_HUMAN Importin-8	14	5.89719	6.38657	5.8382	6.08082	6.62679	6.74183	6.06128	6.40261	6.63019	6.46317	6.41489	6.83476	6.08401	5.97395	5.96451	5.59923	6.0507	6.45813	6.58575	5.90543	1.06734	1.08843	0.975991	0.0940151	0.122247	-0.03506	0.040756	0.0464104	0.0288368	0.0357662
sp|Q92696|PGTA_HUMAN	RABGGTA	PGTA_HUMAN Geranylgeranyl transferase type-2 subunit alpha	28	5.97878	6.31477	5.73582	5.95618	6.5624	6.83527	6.2853	6.35959	6.82348	6.43427	6.28526	6.56348	6.11087	5.92278	6.1152	5.71654	5.99639	6.51064	6.52662	5.96635	1.08576	1.08843	0.99499	0.118706	0.122243	-0.00724561	0.0398371	0.0377957	0.0349692	0.0317047
sp|Q96RU2|UBP28_HUMAN	USP28	UBP28_HUMAN Ubiquitin carboxyl-terminal hydrolase 28	11	5.77772	6.2843	5.86247	6.28212	6.42995	6.4199	6.3256	6.2828	6.40607	6.41648	6.84938	6.67406	6.07781	5.91819	6.13018	5.86298	6.05165	6.36456	6.5865	5.99729	1.05171	1.08838	0.991017	0.0727322	0.122182	-0.0130184	0.0445515	0.0113086	0.0325906	0.0211877
sp|Q96KB5|TOPK_HUMAN	PBK	TOPK_HUMAN Lymphokine-activated killer T-cell-originated protein kinase	31	5.65392	6.14767	5.76851	6.60663	6.62067	6.79593	6.36678	6.42741	6.80954	6.38251	6.5631	6.55798	6.15966	5.69323	5.87161	5.57485	6.04418	6.5527	6.57828	5.82484	1.08413	1.08837	0.96371	0.116542	0.122164	-0.0533294	0.0711849	0.0297548	0.0266857	0.0436694
sp|Q96HP4|OXND1_HUMAN	OXNAD1	OXND1_HUMAN Oxidoreductase NAD-binding domain-containing protein 1	6	6.1028	6.25822	5.56033	6.13214	6.47263	6.78965	6.20316	6.42008	6.83587	6.2349	6.42397	6.68227	6.37538	5.90378	6.02147	5.58335	6.01337	6.47138	6.54425	5.971	1.07616	1.08828	0.992953	0.105899	0.122054	-0.010203	0.0514624	0.0374145	0.0408363	0.0547711
sp|O95382|M3K6_HUMAN	MAP3K6	M3K6_HUMAN Mitogen-activated protein kinase kinase kinase 6	6	6.03204	6.65451	5.52624	6.29067	6.72729	6.66263	6.16878	5.81128	6.78088	6.79512	6.36403	6.7252	6.29101	5.60764	5.74459	5.81812	6.12586	6.3425	6.66631	5.86534	1.03536	1.08822	0.957471	0.0501369	0.121974	-0.0626988	0.0774314	0.0682971	0.0305663	0.0506161
sp|Q14156|EFR3A_HUMAN	EFR3A	EFR3A_HUMAN Protein EFR3 homolog A	3	5.97322	6.14496	5.75733	6.37108	6.17778	6.27271	6.60754	5.95828	6.11585	6.46634	7.22587	6.57698	5.66876	6.32204	6.24738	6.11391	6.06165	6.25408	6.59626	6.08802	1.03175	1.0882	1.00435	0.0450871	0.121938	0.00626373	0.0429262	0.043162	0.0702647	0.0480397
sp|O76094|SRP72_HUMAN	SRP72	SRP72_HUMAN Signal recognition particle subunit SRP72	26	5.8164	6.36193	5.63318	6.01415	6.54691	6.93525	6.15284	6.47679	6.5716	6.84462	6.23515	6.27556	6.36975	6.13713	5.91011	5.71863	5.95641	6.52795	6.48173	6.0339	1.09595	1.08819	1.01301	0.132185	0.121935	0.0186477	0.0523651	0.0492093	0.0439154	0.0466966
sp|O43542|XRCC3_HUMAN	XRCC3	XRCC3_HUMAN DNA repair protein XRCC3	6	6.04038	6.34933	5.75154	5.93982	6.6638	6.46288	5.86902	6.15872	7.03031	5.80375	6.64413	6.72626	6.31425	6.13545	6.23316	5.8772	6.02027	6.2886	6.55111	6.14002	1.04457	1.08818	1.01989	0.0629124	0.121912	0.0284146	0.0415123	0.0553955	0.0801698	0.0309197
sp|Q9NWF9-1|RN216_HUMAN	RNF216	RN216_HUMAN Isoform 2 of E3 ubiquitin-protein ligase RNF216	1	5.99281	6.99873	5.97	5.61082	6.40703	6.61248	5.43517	6.54413	7.07588	6.44881	6.77113	6.44166	6.41009	6.38519	5.96371	4.93236	6.14309	6.2497	6.68437	5.92284	1.01735	1.08811	0.964146	0.024823	0.121827	-0.052676	0.0971255	0.0879562	0.0453113	0.116726
sp|Q86WB0|NIPA_HUMAN	ZC3HC1	NIPA_HUMAN Nuclear-interacting partner of ALK	12	5.71617	6.67097	5.59366	6.02192	6.53652	6.7946	6.20066	6.31807	6.755	6.3132	6.38685	6.66231	6.16851	6.49229	5.66735	5.70192	6.00068	6.46246	6.52934	6.00752	1.07696	1.0881	1.00114	0.106958	0.121811	0.00164295	0.0802884	0.0404687	0.032564	0.0658879
sp|Q02086|SP2_HUMAN	SP2	SP2_HUMAN Transcription factor Sp2	1	5.39574	6.72152	5.70502	7.62109	5.32068	6.7139	4.72671	5.21532	6.96236	7.70322	6.37173	6.64741	5.66699	6.82312	6.99836	5.40685	6.36084	5.49415	6.92118	6.22383	0.863746	1.08809	0.97846	-0.211321	0.1218	-0.0314152	0.15929	0.155319	0.0830051	0.129092
sp|O94905|ERLN2_HUMAN	ERLIN2	ERLN2_HUMAN Erlin-2	12	5.8672	6.41044	5.51559	6.15106	6.72499	7.03858	5.93502	6.64461	6.5008	6.65482	6.30865	6.58883	6.19739	5.86006	5.74772	5.85425	5.98607	6.5858	6.51328	5.91486	1.10019	1.08807	0.988103	0.137749	0.121773	-0.017267	0.0641797	0.0707523	0.023076	0.0330199
sp|Q9UNL2|SSRG_HUMAN	SSR3	SSRG_HUMAN Translocon-associated protein subunit gamma	1	5.8114	6.40172	5.27638	6.33457	5.91316	6.78524	5.88282	6.24747	6.64445	6.51312	6.33958	6.42447	6.49379	6.25549	6.56955	6.10679	5.95602	6.20717	6.4804	6.3564	1.04217	1.08804	1.06722	0.0595882	0.121736	0.0938631	0.0880341	0.0675507	0.0201082	0.0335943
sp|Q9C037|TRIM4_HUMAN	TRIM4	TRIM4_HUMAN Tripartite motif-containing protein 4	10	5.74948	6.75152	5.8246	6.07231	6.85299	6.78333	6.31169	6.22062	6.61109	6.62473	6.50177	6.80643	5.9401	5.78158	5.56154	5.6062	6.09948	6.54216	6.636	5.72236	1.07258	1.08796	0.938171	0.101081	0.121629	-0.0920767	0.0747692	0.0492375	0.0190239	0.0303142
sp|Q7L576|CYFP1_HUMAN	CYFIP1	CYFP1_HUMAN Cytoplasmic FMR1-interacting protein 1	23	5.77592	6.32894	5.75327	6.01287	6.61753	6.58294	6.38979	6.40608	6.68382	6.14694	6.41236	6.72763	6.27535	5.87876	6.10851	5.89928	5.96775	6.49909	6.49269	6.04047	1.08903	1.08796	1.01219	0.12305	0.121629	0.0174749	0.0448895	0.0181312	0.0414923	0.0311015
sp|O75676|KS6A4_HUMAN	RPS6KA4	KS6A4_HUMAN Ribosomal protein S6 kinase alpha-4	9	5.67412	6.37425	5.86931	5.98685	6.38343	6.84288	6.32625	6.30309	6.41237	6.65056	6.46059	6.48362	6.30681	6.02816	5.8753	6.0224	5.97613	6.46391	6.50178	6.05817	1.08162	1.08796	1.01373	0.113196	0.121624	0.0196693	0.0493782	0.039433	0.0159235	0.0297491
sp|O00459|P85B_HUMAN	PIK3R2	P85B_HUMAN Phosphatidylinositol 3-kinase regulatory subunit beta	17	5.61844	6.56965	5.84175	6.1393	6.40395	6.71814	6.34085	6.38898	6.52696	6.36823	6.65992	6.73835	6.18999	5.89861	6.00856	5.58831	6.04228	6.46298	6.57336	5.92137	1.06963	1.08789	0.979988	0.0971053	0.121538	-0.0291638	0.0680623	0.0266477	0.0246783	0.0426352
sp|Q9H0B6|KLC2_HUMAN	KLC2	KLC2_HUMAN Kinesin light chain 2	25	5.91381	6.24195	5.7009	6.21416	6.57815	6.4236	6.39337	6.37869	6.6982	6.44828	6.53531	6.50366	6.17516	5.83462	6.35148	5.60865	6.01771	6.44345	6.54636	5.99248	1.07075	1.08785	0.995808	0.0986205	0.12148	-0.0060608	0.0429108	0.0142353	0.0164099	0.0557224
sp|Q9H1C4|UN93B_HUMAN	UNC93B1	UN93B_HUMAN Protein unc-93 homolog B1	3	5.14946	6.51866	5.74056	6.30763	6.35101	6.36839	6.42104	6.36456	6.5179	6.38526	6.57871	6.31683	6.33294	6.56557	6.25284	5.82865	5.92908	6.37625	6.44968	6.245	1.07542	1.0878	1.05328	0.104901	0.121419	0.0748939	0.103707	0.00482679	0.0185844	0.0492601
tr|B4DUV4|B4DUV4_HUMAN	POFUT1	B4DUV4_HUMAN GDP-fucose protein O-fucosyltransferase 1	2	6.29082	6.00655	5.54326	6.44701	5.58125	6.49745	6.04319	5.98571	6.19831	6.95627	6.63241	6.63315	6.43178	6.43853	5.95372	6.36059	6.07191	6.0269	6.60503	6.29616	0.992587	1.0878	1.03693	-0.0107343	0.121416	0.0523207	0.0653511	0.062229	0.0470989	0.0366885
sp|Q86X10|RLGPB_HUMAN	RALGAPB	RLGPB_HUMAN Ral GTPase-activating protein subunit beta	14	5.86799	6.40554	6.07408	5.94944	6.3656	6.77361	6.10501	6.43414	6.68483	6.54757	6.53055	6.66677	6.13644	5.69462	6.09805	5.66575	6.07426	6.41959	6.60743	5.89872	1.05685	1.08777	0.9711	0.0797719	0.12138	-0.0423085	0.0389437	0.0428888	0.0120462	0.0429072
sp|Q8IWA4|MFN1_HUMAN	MFN1	MFN1_HUMAN Mitofusin-1	11	5.60675	6.13649	6.18671	6.32662	6.46233	6.65123	6.57587	6.07771	6.57321	6.61025	6.53206	6.67012	5.98126	6.14873	5.61526	5.8454	6.06414	6.44179	6.59641	5.89766	1.06227	1.08777	0.972547	0.0871569	0.121377	-0.0401604	0.0520044	0.0395593	0.00888448	0.0382299
sp|P62805|H4_HUMAN	HIST1H4A	H4_HUMAN Histone H4	10	5.77172	6.45423	5.79867	5.9318	6.28795	6.62125	5.7987	6.4229	6.00327	7.55546	6.32732	6.17136	6.99454	6.09994	6.01776	5.74312	5.98911	6.2827	6.51435	6.21384	1.04902	1.0877	1.03752	0.0690443	0.121281	0.0531447	0.0530767	0.0557885	0.108464	0.0872839
sp|O15294|OGT1_HUMAN	OGT	OGT1_HUMAN UDP-N-acetylglucosamine--peptide N-acetylglucosaminyltransferase 110 kDa subunit	37	5.77914	6.43867	5.71354	6.11839	6.58969	6.91654	6.33883	6.39872	6.64842	6.4706	6.53317	6.50668	5.92375	5.81881	6.08937	5.71568	6.01243	6.56095	6.53972	5.8869	1.09123	1.0877	0.979121	0.125954	0.121279	-0.0304407	0.0557172	0.0396408	0.0117546	0.0270912
sp|Q07864|DPOE1_HUMAN	POLE	DPOE1_HUMAN DNA polymerase epsilon catalytic subunit A	27	5.99421	6.47308	5.73099	5.89985	6.60411	6.79405	5.79244	6.2578	6.90648	6.51558	6.25609	6.53315	6.20713	6.07159	5.99636	5.9671	6.02453	6.3621	6.55283	6.06054	1.05603	1.08769	1.00598	0.0786538	0.121268	0.00859824	0.0528238	0.0691441	0.0408439	0.0176844
sp|Q12904-2|AIMP1_HUMAN	AIMP1	AIMP1_HUMAN Isoform 2 of Aminoacyl tRNA synthase complex-interacting multifunctional protein 1	37	5.91244	6.46986	5.68061	6.04947	6.70247	7.03877	6.20669	6.45788	6.66693	6.8204	6.27159	6.46768	6.13679	5.72932	5.80052	5.58859	6.0281	6.60145	6.55665	5.81381	1.09511	1.08768	0.964451	0.131081	0.121257	-0.0522195	0.0549974	0.0537637	0.0364023	0.040014
sp|Q9BTE6|AASD1_HUMAN	AARSD1	AASD1_HUMAN Alanyl-tRNA editing protein Aarsd1	21	5.874	6.13095	5.95159	6.0614	6.49237	6.70715	6.05719	6.28235	6.68757	6.34693	6.38021	6.70906	6.29516	5.94289	6.28704	5.79415	6.00448	6.38476	6.53094	6.07981	1.06333	1.08768	1.01254	0.088593	0.121251	0.0179857	0.0190026	0.0436774	0.0296957	0.0413568
sp|P49419-2|AL7A1_HUMAN	ALDH7A1	AL7A1_HUMAN Isoform 2 of Alpha-aminoadipic semialdehyde dehydrogenase	41	5.84644	6.32686	5.8009	5.93561	6.54071	6.86949	6.51884	6.46344	6.67425	6.62555	6.39173	6.31458	6.12743	5.85038	6.10082	5.61299	5.97745	6.59812	6.50153	5.92291	1.10383	1.08768	0.990874	0.142524	0.121248	-0.0132258	0.0400778	0.0278584	0.0269672	0.0407535
sp|Q969V3|NCLN_HUMAN	NCLN	NCLN_HUMAN Nicalin	20	6.09151	6.56547	5.59299	5.92757	6.69766	6.86684	6.13563	6.40965	6.69511	6.59383	6.53746	6.46968	6.21036	5.77717	5.83166	5.59741	6.04439	6.52744	6.57402	5.85415	1.07992	1.08762	0.968527	0.110923	0.12118	-0.0461358	0.0669416	0.0493702	0.0145051	0.0440206
tr|B1ALC2|B1ALC2_HUMAN	ZNF618	B1ALC2_HUMAN Zinc finger protein 618 (Fragment)	2	6.36927	5.33751	6.35506	6.19802	5.00329	5.54366	6.87688	6.46581	5.73414	5.94114	7.19857	7.51144	5.5629	5.57643	6.14654	8.17936	6.06496	5.97241	6.59632	6.36631	0.984739	1.08761	1.04969	-0.0221861	0.121163	0.0699575	0.0809796	0.142879	0.134823	0.194607
sp|Q53H12|AGK_HUMAN	AGK	AGK_HUMAN Acylglycerol kinase, mitochondrial	14	5.99424	6.4683	5.76782	5.89942	6.73486	6.81591	6.26925	6.47311	6.72271	6.53477	6.41986	6.56646	6.12394	5.66439	6.04198	5.50297	6.03245	6.57328	6.56095	5.83332	1.08965	1.08761	0.966991	0.123871	0.121162	-0.0484256	0.0505668	0.0380272	0.0190345	0.0510144
sp|A1L0T0|ILVBL_HUMAN	ILVBL	ILVBL_HUMAN Acetolactate synthase-like protein	16	5.92424	6.1677	6.0508	5.89817	6.68856	6.792	6.26215	6.31443	6.84665	6.61693	6.29718	6.38504	6.03696	6.00244	5.81862	5.89812	6.01023	6.51429	6.53645	5.93903	1.08387	1.08755	0.988155	0.116187	0.121088	-0.0171911	0.020691	0.0407123	0.0377725	0.0167768
sp|Q659C4|LAR1B_HUMAN	LARP1B	LAR1B_HUMAN La-related protein 1B	3	6.55285	6.00884	5.43164	5.98588	6.1511	6.58943	6.31375	6.39899	6.81117	6.54173	6.13513	6.59025	6.69235	5.94885	5.80188	6.04617	5.9948	6.36332	6.51957	6.12231	1.06147	1.08754	1.02127	0.0860669	0.121065	0.0303645	0.0763724	0.0286763	0.0432308	0.0642025
sp|Q8TF46|DI3L1_HUMAN	DIS3L	DI3L1_HUMAN DIS3-like exonuclease 1	11	5.815	6.06719	5.98627	6.09845	6.78288	6.69924	6.12941	6.43357	6.62779	6.32347	6.53594	6.57627	5.98252	6.04614	6.18587	5.70999	5.99173	6.51127	6.51587	5.98113	1.08671	1.08748	0.998231	0.119968	0.120985	-0.00255394	0.0211871	0.045296	0.020513	0.0333916
sp|Q8IUR0|TPPC5_HUMAN	TRAPPC5	TPPC5_HUMAN Trafficking protein particle complex subunit 5	7	5.76574	6.45022	5.7491	6.00785	6.83882	6.70774	6.13524	6.43621	6.57043	6.36812	6.5581	6.57086	6.42178	5.81879	6.11322	5.48777	5.99323	6.5295	6.51688	5.96039	1.08948	1.08737	0.994521	0.12364	0.120848	-0.00792641	0.0545291	0.0477471	0.0152447	0.0670858
sp|Q5TEU4|NDUF5_HUMAN	NDUFAF5	NDUF5_HUMAN NADH dehydrogenase [ubiquinone] 1 alpha subcomplex assembly factor 5	3	5.99485	6.50691	4.96964	6.28193	6.84068	6.59364	5.95933	6.83224	6.66143	6.52002	6.50489	6.1424	6.29704	6.1842	6.20577	5.50504	5.93833	6.55647	6.45719	6.04801	1.10409	1.08737	1.01847	0.142862	0.120847	0.0264032	0.114333	0.0631802	0.0342846	0.0603952
sp|Q9BT22|ALG1_HUMAN	ALG1	ALG1_HUMAN Chitobiosyldiphosphodolichol beta-mannosyltransferase	4	5.87316	6.59211	5.66006	6.0905	6.40598	6.79531	6.12943	6.20727	7.25944	6.64928	6.16353	6.25818	6.28891	5.97614	5.93969	5.71101	6.05396	6.3845	6.58261	5.97894	1.0546	1.08732	0.987608	0.0766945	0.120781	-0.0179894	0.0659889	0.0466129	0.0756241	0.039746
sp|Q9BZF1|OSBL8_HUMAN	OSBPL8	OSBL8_HUMAN Oxysterol-binding protein-related protein 8	37	5.85509	6.24906	5.78424	6.17043	6.25292	6.63124	6.1398	6.47712	6.58168	7.06425	6.21081	6.3022	6.10037	5.97242	6.24248	5.96588	6.01471	6.37527	6.53974	6.07029	1.05995	1.08729	1.00924	0.0839925	0.120738	0.0132709	0.0381266	0.03464	0.0586597	0.0214863
sp|Q7LGC8|CHST3_HUMAN	CHST3	CHST3_HUMAN Carbohydrate sulfotransferase 3	1	6.1328	5.92427	7.51895	5.58311	5.6074	6.13228	5.22429	4.80055	7.91895	6.34863	5.48581	7.60095	7.09577	6.13221	6.13707	6.35697	6.28978	5.44113	6.83859	6.4305	0.865074	1.08725	1.02237	-0.209104	0.120688	0.0319219	0.13517	0.104111	0.164974	0.07087
sp|Q96S21|RB40C_HUMAN	RAB40C	RB40C_HUMAN Ras-related protein Rab-40C	2	5.97594	6.50523	5.9665	5.56083	6.86861	7.08069	6.46088	6.06974	6.65922	5.87841	7.10859	6.45708	5.37772	6.12373	5.61735	6.28949	6.00212	6.61998	6.52583	5.85207	1.10294	1.08725	0.975	0.141353	0.120687	-0.0365257	0.0645133	0.0676759	0.0782002	0.0728488
sp|O43175|SERA_HUMAN	PHGDH	SERA_HUMAN D-3-phosphoglycerate dehydrogenase	65	5.7687	6.49578	5.62731	6.08507	6.72152	7.0787	6.41031	6.48487	6.71114	6.53034	6.40036	6.42684	6.04162	5.7442	5.88878	5.58447	5.99422	6.67385	6.51717	5.81477	1.11338	1.08724	0.970063	0.154948	0.120675	-0.0438493	0.0642736	0.0450632	0.0216277	0.0336646
sp|Q9UQ53-3|MGT4B_HUMAN	MGAT4B	MGT4B_HUMAN Isoform 3 of Alpha-1,3-mannosyl-glycoprotein 4-beta-N-acetylglucosaminyltransferase B	3	5.34229	5.63937	6.2261	6.18525	6.16716	6.25404	6.8405	6.2307	6.2326	6.20546	6.31511	6.68039	6.27904	6.61836	6.50477	6.27885	5.84825	6.3731	6.35839	6.42026	1.08974	1.08723	1.09781	0.12399	0.120656	0.134625	0.0736101	0.0492312	0.0345484	0.0264214
sp|O43292|GPAA1_HUMAN	GPAA1	GPAA1_HUMAN Glycosylphosphatidylinositol anchor attachment 1 protein	9	5.92213	5.96715	6.09774	6.3213	6.16282	6.29284	6.39427	5.98453	6.62236	6.40358	6.56178	6.84092	6.11158	6.03713	6.30951	5.97033	6.07708	6.20861	6.60716	6.10714	1.02164	1.08723	1.00495	0.0308932	0.120652	0.00711804	0.0294613	0.0284915	0.0274079	0.0240265
sp|P23921|RIR1_HUMAN	RRM1	RIR1_HUMAN Ribonucleoside-diphosphate reductase large subunit	63	5.9893	6.52048	5.70929	5.78923	6.67468	6.88412	6.23488	6.39638	6.74252	6.59222	6.41628	6.35132	6.13507	6.05691	5.9252	5.58212	6.00207	6.54752	6.52559	5.92483	1.09088	1.08722	0.987129	0.125486	0.120646	-0.0186888	0.0608319	0.0440942	0.0270994	0.0412389
sp|P14618-2|KPYM_HUMAN	PKM	KPYM_HUMAN Isoform M1 of Pyruvate kinase PKM	410	5.91845	6.21086	5.87138	6.11783	6.6514	6.57975	6.42971	6.39915	6.73518	6.4168	6.57369	6.49613	6.18093	5.73531	6.03919	5.64423	6.02963	6.515	6.55545	5.89992	1.0805	1.08721	0.978487	0.111696	0.120625	-0.0313753	0.0267469	0.0184814	0.0207256	0.0427488
sp|Q9UKJ8|ADA21_HUMAN	ADAM21	ADA21_HUMAN Disintegrin and metalloproteinase domain-containing protein 21	1	4.80701	6.6645	6.4782	6.78814	6.62397	6.86156	5.29907	7.14769	6.83019	7.37828	5.98814	6.6968	4.61668	5.7067	6.87502	5.23805	6.18446	6.48307	6.72335	5.60911	1.04828	1.08714	0.906968	0.0680295	0.120533	-0.140876	0.149907	0.126153	0.0850781	0.170214
sp|Q9NX46|ARHL2_HUMAN	ADPRHL2	ARHL2_HUMAN Poly(ADP-ribose) glycohydrolase ARH3	14	5.93545	6.30666	5.73984	6.02757	6.38446	6.73777	6.50419	6.42098	6.73149	6.47838	6.52036	6.37101	6.23077	6.05467	6.10815	5.44825	6.00238	6.51185	6.52531	5.96046	1.08488	1.08712	0.993016	0.117533	0.120512	-0.010111	0.0392635	0.0243753	0.0231648	0.0586095
sp|O43314|VIP2_HUMAN	PPIP5K2	VIP2_HUMAN Inositol hexakisphosphate and diphosphoinositol-pentakisphosphate kinase 2	18	6.04813	6.16712	5.96802	5.91943	6.59844	7.04432	5.8511	6.14305	6.75931	6.69958	6.24377	6.4981	6.22564	6.2333	5.91883	5.68187	6.02567	6.40923	6.55019	6.01491	1.06365	1.08705	0.998213	0.0890276	0.120414	-0.00257971	0.0179568	0.0816465	0.0355483	0.0442214
sp|P49593|PPM1F_HUMAN	PPM1F	PPM1F_HUMAN Protein phosphatase 1F	8	5.74458	6.29337	5.82565	6.18269	6.42711	6.21018	6.69542	6.51006	6.66446	6.11528	6.88283	6.476	6.16857	5.82124	6.35619	5.62638	6.01157	6.46069	6.53464	5.9931	1.07471	1.08701	0.996926	0.103946	0.120366	-0.00444118	0.0444845	0.0311389	0.0497754	0.0550586
sp|O43824|GTPB6_HUMAN	GTPBP6	GTPB6_HUMAN Putative GTP-binding protein 6	8	5.95409	6.84971	5.58717	5.74817	6.64887	7.01571	5.9834	6.25422	6.74634	6.90202	6.18172	6.40937	6.30963	6.17056	5.65155	5.58747	6.03478	6.47555	6.55986	5.9298	1.07304	1.08701	0.982604	0.1017	0.120363	-0.0253183	0.0934011	0.0698067	0.0495914	0.0613355
sp|Q9H6W3|NO66_HUMAN	NO66	NO66_HUMAN Bifunctional lysine-specific demethylase and histidyl-hydroxylase NO66	4	5.87006	6.69156	5.64287	6.02446	7.02287	7.18402	5.82027	6.07141	6.72183	6.95847	6.34596	6.30972	6.51455	5.82177	5.89461	5.10556	6.05724	6.52464	6.58399	5.83412	1.07716	1.08696	0.963166	0.107239	0.120303	-0.0541443	0.0744547	0.104121	0.0473134	0.0988419
sp|Q9BTE3|MCMBP_HUMAN	MCMBP	MCMBP_HUMAN Mini-chromosome maintenance complex-binding protein	52	5.96371	6.38846	5.60578	5.98118	6.7348	6.6758	6.37225	6.4596	6.7102	6.39717	6.46868	6.44471	6.17501	5.84723	6.17435	5.60105	5.98478	6.56061	6.50519	5.94941	1.09622	1.08696	0.99409	0.132532	0.120292	-0.00855221	0.0534564	0.0262969	0.0215008	0.0468719
sp|Q9UPM8|AP4E1_HUMAN	AP4E1	AP4E1_HUMAN AP-4 complex subunit epsilon-1	10	5.47706	6.25996	6.11096	6.31976	6.65043	6.58593	6.19655	6.36982	6.37005	6.39044	6.63102	6.87715	6.20605	5.76861	6.06457	5.72165	6.04193	6.45068	6.56717	5.94022	1.06765	1.08693	0.983165	0.0944411	0.12026	-0.0244943	0.0639998	0.0321851	0.0362752	0.0392824
sp|Q8WWY3|PRP31_HUMAN	PRPF31	PRP31_HUMAN U4/U6 small nuclear ribonucleoprotein Prp31	18	5.92108	6.46579	5.64608	5.93573	6.55899	6.93723	6.11025	6.36892	6.74256	6.50109	6.35553	6.45206	6.37521	5.98994	5.95733	5.68221	5.99217	6.49385	6.51281	6.00117	1.08372	1.08689	1.0015	0.115995	0.120202	0.00216585	0.0571916	0.0536094	0.0252842	0.0474921
sp|Q8WU20|FRS2_HUMAN	FRS2	FRS2_HUMAN Fibroblast growth factor receptor substrate 2	1	5.53777	5.39926	7.22431	6.01195	5.48669	5.63065	5.79868	5.93204	6.51769	6.16031	6.21484	7.38002	6.55113	7.17238	7.27154	5.71074	6.04332	5.71202	6.56822	6.67645	0.945178	1.08685	1.10476	-0.0813422	0.120159	0.143739	0.137322	0.0340244	0.0858029	0.107605
sp|Q15172|2A5A_HUMAN	PPP2R5A	2A5A_HUMAN Serine/threonine-protein phosphatase 2A 56 kDa regulatory subunit alpha isoform	7	5.56784	6.14352	5.96762	6.19547	6.59151	7.1389	6.39379	6.21178	6.37468	6.48177	6.42872	6.6625	5.63693	6.2331	6.38991	5.58196	5.96861	6.58399	6.48692	5.96047	1.1031	1.08684	0.998637	0.141568	0.120137	-0.00196829	0.0476519	0.0609239	0.0192623	0.0689495
sp|Q9HCL2|GPAT1_HUMAN	GPAM	GPAT1_HUMAN Glycerol-3-phosphate acyltransferase 1, mitochondrial	4	5.70407	6.27342	6.3192	5.99578	5.9581	6.22074	6.32055	6.86911	5.95694	6.9928	5.98869	7.46341	5.93226	6.22909	5.94416	5.83167	6.07312	6.34213	6.60046	5.9843	1.04429	1.08683	0.985374	0.062529	0.120129	-0.021256	0.0468491	0.0604119	0.113611	0.0285446
sp|Q7Z6M4|MTER2_HUMAN	MTERFD2	MTER2_HUMAN mTERF domain-containing protein 2	5	5.80469	5.99763	6.70867	5.877	6.9093	6.83687	5.87591	5.7789	6.57435	7.07437	6.65881	6.19689	6.02941	6.0229	5.88936	5.76496	6.097	6.35025	6.6261	5.92666	1.04154	1.08678	0.972062	0.0587133	0.120062	-0.0408803	0.0681443	0.095389	0.0543386	0.0211995
sp|Q8WVF1|OSCP1_HUMAN	OSCP1	OSCP1_HUMAN Protein OSCP1	1	6.28763	6.07896	5.84233	6.25297	5.69868	5.45871	6.24636	6.4699	5.72288	6.22827	7.63694	6.99641	6.91198	4.98563	6.48786	6.69449	6.11547	5.96841	6.64613	6.26999	0.975953	1.08677	1.02527	-0.0351167	0.120049	0.0359992	0.0333093	0.0786645	0.126824	0.139326
sp|Q8TDX7|NEK7_HUMAN	NEK7	NEK7_HUMAN Serine/threonine-protein kinase Nek7	9	6.21979	6.64873	5.45856	5.78025	6.93993	7.30597	6.09312	6.27514	6.83197	6.64008	6.29755	6.42733	6.25151	5.90744	5.62448	5.29815	6.02683	6.65354	6.54923	5.7704	1.10399	1.08668	0.957451	0.142722	0.119926	-0.0627299	0.0860958	0.0852387	0.0359603	0.0703628
sp|Q9Y2K6|UBP20_HUMAN	USP20	UBP20_HUMAN Ubiquitin carboxyl-terminal hydrolase 20	4	5.60183	5.99675	5.98414	6.70438	6.48677	6.19602	6.3358	6.1207	6.84198	6.58068	6.22395	6.74536	6.255	5.94477	6.43775	5.54412	6.07177	6.28482	6.59799	6.04541	1.03509	1.08667	0.995658	0.0497537	0.119909	-0.00627814	0.0757333	0.0256897	0.0411784	0.064722
sp|Q9Y2Z4|SYYM_HUMAN	YARS2	SYYM_HUMAN Tyrosine--tRNA ligase, mitochondrial	16	5.96664	6.72393	5.34927	5.68647	6.85657	7.21479	6.09777	6.3964	6.80428	6.55493	6.19167	6.23106	6.32869	6.09963	5.97771	5.52016	5.93158	6.64138	6.44548	5.98155	1.11967	1.08664	1.00842	0.163068	0.119873	0.0121029	0.0986985	0.0743071	0.0448867	0.0568861
sp|Q9NQT5|EXOS3_HUMAN	EXOSC3	EXOS3_HUMAN Exosome complex component RRP40	10	5.91763	6.49737	5.72006	6.25781	6.69429	6.76866	6.17469	6.18998	6.78193	6.73962	6.4049	6.57943	6.06864	5.77818	5.78692	5.63988	6.09822	6.4569	6.62647	5.81841	1.05882	1.08662	0.954116	0.0824552	0.119853	-0.0677639	0.0568373	0.049336	0.0258869	0.0309201
tr|Q5VZU9|Q5VZU9_HUMAN	TPP2	Q5VZU9_HUMAN Tripeptidyl-peptidase 2	2	6.69379	5.87845	5.19177	6.40541	6.20576	6.97747	5.71359	5.94138	6.7878	7.09616	5.79274	6.58627	6.01329	6.27163	6.41346	6.03104	6.04235	6.20955	6.56574	6.18236	1.02767	1.08662	1.02317	0.0393778	0.119847	0.0330456	0.109218	0.0885785	0.0847367	0.0313728
sp|Q9UPU7|TBD2B_HUMAN	TBC1D2B	TBD2B_HUMAN TBC1 domain family member 2B	7	5.88742	6.45262	5.66041	6.15256	6.58843	6.6327	5.90273	6.76749	6.41649	6.66615	6.58001	6.58086	6.36932	6.07873	5.62599	5.63809	6.03825	6.47284	6.56088	5.92803	1.07197	1.08655	0.981746	0.100267	0.119758	-0.0265777	0.0565897	0.0598849	0.0159119	0.0610354
sp|P46934-4|NEDD4_HUMAN	NEDD4	NEDD4_HUMAN Isoform 4 of E3 ubiquitin-protein ligase NEDD4	14	5.88815	6.30589	5.83561	6.00121	6.63553	6.52601	6.68843	6.33793	6.51248	6.40904	6.60766	6.58086	6.1405	5.77496	6.04206	5.71368	6.00772	6.54697	6.52751	5.9178	1.08976	1.08652	0.985033	0.124012	0.119716	-0.0217554	0.0350298	0.0236612	0.013568	0.0347823
sp|O43815|STRN_HUMAN	STRN	STRN_HUMAN Striatin	25	5.85657	6.37322	5.85225	6.10291	6.31891	6.527	6.2723	6.29048	6.67162	6.46369	6.68933	6.45029	6.15604	5.84499	6.16125	5.96913	6.04624	6.35217	6.56873	6.03285	1.0506	1.08642	0.997786	0.0712124	0.119577	-0.00319734	0.0409307	0.0185951	0.0196914	0.0255028
sp|Q8TEA1|NSUN6_HUMAN	NSUN6	NSUN6_HUMAN Putative methyltransferase NSUN6	12	5.7775	6.40776	5.8066	6.22815	6.38187	6.25569	6.44029	6.49918	6.58546	6.34296	6.79338	6.59107	6.03202	6.00818	6.01866	5.83123	6.055	6.39426	6.57822	5.97252	1.05603	1.08641	0.986378	0.0786493	0.119569	-0.0197872	0.0516244	0.0162731	0.0280111	0.0158558
sp|Q12851|M4K2_HUMAN	MAP4K2	M4K2_HUMAN Mitogen-activated protein kinase kinase kinase kinase 2	5	6.0474	6.20381	5.65102	5.93275	6.29564	7.03992	6.3784	6.68837	6.8146	6.54885	6.15509	6.376	6.22774	6.165	5.78402	5.69137	5.95875	6.60058	6.47364	5.96703	1.10771	1.08641	1.00139	0.147585	0.119568	0.00200512	0.0391526	0.0512335	0.043042	0.0450353
sp|Q16644|MAPK3_HUMAN	MAPKAPK3	MAPK3_HUMAN MAP kinase-activated protein kinase 3	10	5.87756	6.18443	5.65432	6.39993	6.90525	6.56465	6.48405	6.41521	6.58667	6.35296	6.66425	6.59552	6.25104	5.57082	5.95388	5.53946	6.02906	6.59229	6.54985	5.8288	1.09342	1.08638	0.966784	0.128847	0.119529	-0.0487342	0.0545979	0.0329771	0.0207276	0.0581122
sp|Q8WWN8|ARAP3_HUMAN	ARAP3	ARAP3_HUMAN Arf-GAP with Rho-GAP domain, ANK repeat and PH domain-containing protein 3	7	5.71497	6.46949	5.47728	6.01428	6.51655	6.50808	6.23844	6.56648	6.55041	5.88269	6.59723	6.68965	5.96387	5.98579	6.46939	6.35539	5.91901	6.45739	6.42999	6.19361	1.09096	1.08633	1.04639	0.125596	0.119463	0.0654259	0.0722641	0.0229538	0.0574538	0.0414996
sp|P50148|GNAQ_HUMAN	GNAQ	GNAQ_HUMAN Guanine nucleotide-binding protein G(q) subunit alpha	4	6.0858	6.12991	5.75332	6.4706	6.31369	6.28354	6.40525	6.51011	7.02947	6.18628	6.84885	6.48485	6.43486	5.62562	5.76069	5.67717	6.10991	6.37815	6.63736	5.87458	1.0439	1.08633	0.961485	0.0619869	0.11946	-0.0566636	0.0480189	0.0160029	0.0567213	0.0642837
sp|O00541|PESC_HUMAN	PES1	PESC_HUMAN Pescadillo homolog	34	5.82074	6.51164	5.69365	5.93047	6.8471	6.97765	6.5496	6.72871	6.58376	6.40068	6.50313	6.53563	5.90049	5.65912	5.89094	5.46667	5.98912	6.77576	6.5058	5.72931	1.13134	1.08627	0.956618	0.178039	0.119381	-0.0639851	0.0603651	0.0268387	0.0119145	0.0362404
sp|Q9BRJ7|SDOS_HUMAN	NUDT16L1	SDOS_HUMAN Protein syndesmos	13	6.02872	6.1576	5.83301	6.16644	6.85429	6.64545	6.28648	6.08057	6.95592	6.53478	6.40719	6.37209	6.20205	5.98234	5.89826	5.59479	6.04644	6.4667	6.5675	5.91936	1.0695	1.08618	0.978982	0.0969426	0.119257	-0.0306454	0.0257322	0.0538468	0.0408405	0.0424781
sp|P26640|SYVC_HUMAN	VARS	SYVC_HUMAN Valine--tRNA ligase	96	5.83682	6.35728	5.67617	5.96219	6.75336	6.69433	6.16587	6.47667	6.6672	6.59608	6.33735	6.28557	6.45819	5.92342	5.94192	5.86758	5.95812	6.52256	6.47155	6.04778	1.09474	1.08617	1.01505	0.130582	0.119255	0.0215491	0.048794	0.0407661	0.0290985	0.0455419
sp|Q96RT8|GCP5_HUMAN	TUBGCP5	GCP5_HUMAN Gamma-tubulin complex component 5	4	5.92427	6.17106	5.98864	6.33818	6.811	6.44142	6.22437	6.72738	6.80586	6.42146	6.81358	6.48437	5.97613	5.53269	5.9071	5.43249	6.10554	6.55104	6.63132	5.7121	1.07297	1.08612	0.935561	0.101606	0.119177	-0.0960964	0.0306326	0.0410926	0.031309	0.0472039
sp|Q96EK5|KBP_HUMAN	KIAA1279	KBP_HUMAN KIF1-binding protein	32	5.88977	6.27903	5.86221	6.06343	6.79383	6.7926	6.38929	6.45374	6.71687	6.19744	6.71595	6.53901	6.08194	5.70104	6.0229	5.50095	6.02361	6.60736	6.54232	5.82671	1.09691	1.08611	0.967312	0.133447	0.119173	-0.0479475	0.0319028	0.0327224	0.0373958	0.047058
sp|Q9H6V9-2|CB043_HUMAN	C2orf43	CB043_HUMAN Isoform 2 of UPF0554 protein C2orf43	8	5.80003	6.31986	5.86668	6.10092	6.18509	6.77304	6.48481	6.76544	6.59834	6.86807	6.24764	6.44691	5.90235	5.97457	6.05613	5.61012	6.02187	6.55209	6.54024	5.88579	1.08805	1.08608	0.977402	0.121744	0.119131	-0.0329755	0.0393375	0.0425845	0.0399858	0.0329983
sp|Q7Z3E5|ARMC9_HUMAN	ARMC9	ARMC9_HUMAN LisH domain-containing protein ARMC9	7	5.81915	6.71566	5.43574	5.65897	6.84003	7.1799	6.24117	6.59469	6.58621	6.61462	6.0288	6.43288	6.51817	5.79215	5.95014	5.59173	5.90738	6.71395	6.41563	5.96305	1.13654	1.08604	1.00942	0.184643	0.119072	0.0135314	0.0950208	0.0590006	0.042078	0.0667583
sp|P53367-2|ARFP1_HUMAN	ARFIP1	ARFP1_HUMAN Isoform A of Arfaptin-1	1	6.54933	6.0269	5.51758	5.65865	6.17507	5.61705	6.8935	6.95573	6.34992	5.89905	6.89629	6.64946	6.48199	5.69307	6.87488	5.76152	5.93811	6.41034	6.44868	6.20287	1.07952	1.08598	1.04458	0.110395	0.118999	0.0629297	0.0775643	0.0992992	0.0665488	0.0923393
sp|P07199|CENPB_HUMAN	CENPB	CENPB_HUMAN Major centromere autoantigen B	2	5.91806	6.67553	5.64557	5.99911	6.9078	7.06425	5.73457	6.24847	6.50979	6.66479	6.88154	6.2655	6.0231	6.00133	6.05272	5.40787	6.05957	6.48877	6.5804	5.87125	1.07083	1.08595	0.968923	0.0987308	0.118962	-0.0455459	0.0722165	0.0947227	0.0394288	0.0527384
sp|Q9NYT0|PLEK2_HUMAN	PLEK2	PLEK2_HUMAN Pleckstrin-2	8	6.20374	6.23249	5.30269	6.10069	7.04746	7.2545	6.32505	6.03935	6.58683	6.54546	6.21011	6.54586	6.2325	5.98518	5.94878	5.43931	5.9599	6.66659	6.47207	5.90144	1.11857	1.08593	0.990191	0.16166	0.118937	-0.0142211	0.0741255	0.0866373	0.0271493	0.0564058
sp|P20671|H2A1D_HUMAN	HIST1H2AD	H2A1D_HUMAN Histone H2A type 1-D	1	6.17348	6.82925	5.80422	5.6284	6.26786	6.13368	6.80552	4.99021	7.35117	6.55815	7.54674	5.07814	5.59365	6.98387	6.75677	5.49889	6.10884	6.04932	6.63355	6.20829	0.990257	1.08589	1.01628	-0.0141255	0.118883	0.0232992	0.0869696	0.126199	0.169078	0.124191
sp|O75489|NDUS3_HUMAN	NDUFS3	NDUS3_HUMAN NADH dehydrogenase [ubiquinone] iron-sulfur protein 3, mitochondrial	10	5.72418	6.21558	6.0859	6.14338	6.31461	6.38904	6.17431	6.70402	6.36878	6.48481	6.83889	6.55236	6.01275	6.24386	5.89322	5.8543	6.04226	6.3955	6.56121	6.00103	1.05846	1.08589	0.993177	0.0819678	0.118874	-0.00987752	0.0361768	0.035044	0.0304886	0.0292221
sp|Q7Z3U7|MON2_HUMAN	MON2	MON2_HUMAN Protein MON2 homolog	14	5.88916	6.48866	6.05209	6.00019	6.52018	6.9201	6.13979	6.27543	6.78081	6.51705	6.61958	6.61	5.99597	5.69573	5.84843	5.64684	6.10752	6.46387	6.63186	5.79674	1.05835	1.08585	0.949115	0.0818114	0.118826	-0.0753455	0.0430652	0.0529819	0.016517	0.0272831
sp|Q14155-5|ARHG7_HUMAN	ARHGEF7	ARHG7_HUMAN Isoform 5 of Rho guanine nucleotide exchange factor 7	23	5.96409	6.49264	5.56742	6.00048	6.59224	6.6095	6.26288	6.42051	6.85357	6.23309	6.48994	6.51042	6.31868	5.92529	6.05271	5.70654	6.00616	6.47128	6.52175	6.00081	1.07744	1.08584	0.999109	0.107609	0.118818	-0.00128626	0.0631045	0.0251941	0.0390492	0.0425985
sp|Q14318-2|FKBP8_HUMAN	FKBP8	FKBP8_HUMAN Isoform 2 of Peptidyl-prolyl cis-trans isomerase FKBP8	12	6.08752	6.48156	5.59288	6.26063	6.81332	6.91269	6.28897	6.34536	6.53105	6.68459	6.66515	6.63758	6.00026	5.73402	5.57058	5.39385	6.10565	6.59008	6.62959	5.67468	1.07934	1.08581	0.929415	0.110153	0.118776	-0.105606	0.0619053	0.0483414	0.0103276	0.045412
sp|Q9BU19-5|ZN692_HUMAN	ZNF692	ZN692_HUMAN Isoform 5 of Zinc finger protein 692	2	5.91447	5.94071	6.18763	6.39518	6.76634	5.89196	5.83073	6.24884	6.27599	6.73177	7.04063	6.48647	6.50405	6.33703	5.69097	5.75722	6.1095	6.18447	6.63372	6.07232	1.01227	1.0858	0.993914	0.0175957	0.118763	-0.0088065	0.037114	0.0694481	0.0496043	0.0673102
sp|O43172|PRP4_HUMAN	PRPF4	PRP4_HUMAN U4/U6 small nuclear ribonucleoprotein Prp4	16	5.97424	6.06898	5.92973	6.08341	6.43023	6.45924	6.31964	6.25205	6.80445	6.33847	6.41129	6.56587	6.27079	6.0573	6.17062	5.86367	6.01409	6.36529	6.53002	6.09059	1.0584	1.08579	1.01272	0.0818798	0.118741	0.0182367	0.0123399	0.0151642	0.0315562	0.0286706
sp|Q9H4L5-2|OSBL3_HUMAN	OSBPL3	OSBL3_HUMAN Isoform 1b of Oxysterol-binding protein-related protein 3	27	5.87969	6.36896	5.73347	6.20481	6.61384	6.56722	6.24187	6.39962	6.75259	6.4481	6.58942	6.4694	6.29785	5.85638	6.00158	5.57521	6.04673	6.45564	6.56488	5.93276	1.06762	1.08569	0.981151	0.0944038	0.118612	-0.0274536	0.0482021	0.0262748	0.0212877	0.0507259
sp|P51530|DNA2_HUMAN	DNA2	DNA2_HUMAN DNA replication ATP-dependent helicase/nuclease DNA2	5	5.61372	6.06967	6.08054	6.27557	5.8947	6.08675	6.71569	5.97198	6.29511	6.06543	6.73698	6.99987	6.50366	6.19143	6.18713	6.31177	6.00987	6.16728	6.52435	6.2985	1.02619	1.0856	1.04802	0.0372994	0.118499	0.0676727	0.0466792	0.0606464	0.0646952	0.023573
sp|Q7L8W6|DPH6_HUMAN	DPH6	DPH6_HUMAN Diphthine--ammonia ligase	2	6.2212	5.93818	6.04342	5.99972	6.71158	6.42321	6.30688	6.12573	6.67802	5.94188	6.51054	7.1428	5.35413	6.04317	6.12401	6.43555	6.05063	6.39185	6.56831	5.98921	1.05639	1.08556	0.98985	0.0791482	0.118437	-0.0147184	0.0201023	0.038455	0.0755028	0.0761259
sp|Q99956|DUS9_HUMAN	DUSP9	DUS9_HUMAN Dual specificity protein phosphatase 9	6	5.679	6.30994	6.19217	5.91165	6.9001	6.73928	6.38251	6.74613	6.34145	6.5683	6.77994	6.4634	6.03667	5.6873	5.64707	5.6151	6.02319	6.692	6.53827	5.74653	1.11104	1.08552	0.954068	0.151911	0.118382	-0.0678355	0.0471238	0.0327679	0.0284289	0.0340494
[truncated: 7,394 more rows]

## Sheet: Filtered dataset (25uM)
Uniprot Id	Gene Symbol	Description	Number of peptides	Veh_1	Veh_2	Veh_3	Veh_4	25uM_alisertib_1	25uM_alisertib_2	25uM_alisertib_3	25uM_alisertib_4	Average (Veh)	Average (25uM)	fold change (25uM/Veh)	log2 fold change (25uM/Veh)	CV (Veh)	CV (25uM)
[truncated: 7,317 more rows]

[truncated: 3 more sheets: Perseus output (5uM), Perseus output (25uM), Perseus output (125uM)]
