# Supplementary material for: Assessing target engagement using proteome-wide solvent shift assays
Source: eLife. 2021 Dec 8;10:e70784. doi: 10.7554/eLife.70784 (PMC8654358; doi:10.7554/eLife.70784)
Supplement: Figure 4—source data 2. [file elife-70784-fig4-data2.xlsx]

## Sheet: Legend
This table contains solvent-PISA data for DMSO- and MK2206-treated HCT116 lysates (N=4)
The sixteen samples contained within represent one TMTpro 16plex
Full dataset tab - Unfiltered protein abundance data - 8194 proteins
Uniprot Id
Gene Symbol
Description
Number of peptides	Number of quantified peptides
Veh_1 (126)	TMT SSN scaled to 100
Veh_2 (127N)	TMT SSN scaled to 100
Veh_3 (127C)	TMT SSN scaled to 100
Veh_4 (128N)	TMT SSN scaled to 100
5uM_MK2206_1 (128C)	TMT SSN scaled to 100
5uM_MK2206_2 (129N)	TMT SSN scaled to 100
5uM_MK2206_3 (129C)	TMT SSN scaled to 100
5uM_MK2206_4 (130N)	TMT SSN scaled to 100
25uM_MK2206_1 (130C)	TMT SSN scaled to 100
25uM_MK2206_2 (131N)	TMT SSN scaled to 100
25uM_MK2206_3 (131C)	TMT SSN scaled to 100
25uM_MK2206_4 (132N)	TMT SSN scaled to 100
125uM_MK2206_1 (132C)	TMT SSN scaled to 100
125uM_MK2206_2 (133N)	TMT SSN scaled to 100
125uM_MK2206_3 (133C)	TMT SSN scaled to 100
125uM_MK2206_4 (134)	TMT SSN scaled to 100
Average (Veh)	Mean of Vehicle treated samples
Average (5uM)	Mean of 5uM MK2206-treated samples
Average (25uM)	Mean of 25uM MK2206-treated samples
Average (125uM)	Mean of 125uM MK2206-treated samples
fold change (5uM/Veh)	fold change of 5uM MK2206-treated samples compared to vehicle treated control
fold change (25uM/Veh)	fold change of 25uM MK2206-treated samples compared to vehicle treated control
fold change (125uM/Veh)	fold change of 125uM MK2206-treated samples compared to vehicle treated control
log2 fold change (5uM/Veh)	log2 trasnfomation of fold change
log2 fold change (25uM/Veh)	log2 trasnfomation of fold change
log2 fold change (125uM/Veh)	log2 trasnfomation of fold change
CV (Veh)	%CV of vehicle-treated samples
CV (5uM)	%CV of 5uM MK2206-treated samples
CV (25uM)	%CV of 25uM MK2206-treated samples
CV (125uM)	%CV of 125uM MK2206-treated samples
Filtered dataset tab - 25uM MK2206 - Proteins quantified with at least two peptides, %CV < 15% - 6794 proteins
Uniprot Id
Gene Symbol
Description
Number of peptides	Number of quantified peptides
Veh_1 (126)	TMT SSN scaled to 100
Veh_2 (127N)	TMT SSN scaled to 100
Veh_3 (127C)	TMT SSN scaled to 100
Veh_4 (128N)	TMT SSN scaled to 100
25uM_MK2206_1 (130C)	TMT SSN scaled to 100
25uM_MK2206_2 (131N)	TMT SSN scaled to 100
25uM_MK2206_3 (131C)	TMT SSN scaled to 100
25uM_MK2206_4 (132N)	TMT SSN scaled to 100
Average (Veh)	Mean of Vehicle treated samples
Average (25uM)	Mean of 25uM MK2206-treated samples
fold change (25uM/Veh)	fold change of 25uM MK2206-treated samples compared to vehicle treated control
log2 fold change (25uM/Veh)	log2 trasnfomation of fold change
CV (Veh)	%CV of vehicle-treated samples
CV (25uM)	%CV of 25uM MK2206-treated samples
pbFDR - Perseus (5uM) tab - Proteins quantified with at least two peptides - 7067 proteins
Significant	+ indicates an FDR < 0.05
-LOG(P-value)	nominal p-value
Difference	log2 transformation of fold change (5uM MK2206/Vehicle)
Protein Id
Gene Symbol
Description
Number of peptides	Number of quantified peptides
Veh_1	TMT SSN scaled to 100 - log2 transformation
Veh_2	TMT SSN scaled to 100 - log2 transformation
Veh_3	TMT SSN scaled to 100 - log2 transformation
Veh_4	TMT SSN scaled to 100 - log2 transformation
5_MK2206_1	TMT SSN scaled to 100 - log2 transformation
5_MK2206_2	TMT SSN scaled to 100 - log2 transformation
5_MK2206_3	TMT SSN scaled to 100 - log2 transformation
5_MK2206_4	TMT SSN scaled to 100 - log2 transformation
pbFDR - Perseus (25uM) tab - Proteins quantified with at least two peptides - 7067 proteins
Significant	+ indicates an FDR < 0.05
-LOG(P-value)	nominal p-value
Difference	log2 transformation of fold change (25uM MK2206/Vehicle)
Protein Id
Gene Symbol
Description
Number of peptides	Number of quantified peptides
Veh_1	TMT SSN scaled to 100 - log2 transformation
Veh_2	TMT SSN scaled to 100 - log2 transformation
Veh_3	TMT SSN scaled to 100 - log2 transformation
Veh_4	TMT SSN scaled to 100 - log2 transformation
25_MK2206_1	TMT SSN scaled to 100 - log2 transformation
25_MK2206_2	TMT SSN scaled to 100 - log2 transformation
25_MK2206_3	TMT SSN scaled to 100 - log2 transformation
25_MK2206_4	TMT SSN scaled to 100 - log2 transformation
pbFDR - Perseus (125uM) tab - Proteins quantified with at least two peptides - 7067 proteins
Significant	+ indicates an FDR < 0.05
-LOG(P-value)	nominal p-value
Difference	log2 transformation of fold change (125uM MK2206/Vehicle)
Protein Id
Gene Symbol
Description
Number of peptides	Number of quantified peptides
Veh_1	TMT SSN scaled to 100 - log2 transformation
Veh_2	TMT SSN scaled to 100 - log2 transformation
Veh_3	TMT SSN scaled to 100 - log2 transformation
Veh_4	TMT SSN scaled to 100 - log2 transformation
125_MK2206_1	TMT SSN scaled to 100 - log2 transformation
125_MK2206_2	TMT SSN scaled to 100 - log2 transformation
125_MK2206_3	TMT SSN scaled to 100 - log2 transformation
125_MK2206_4	TMT SSN scaled to 100 - log2 transformation

## Sheet: Full dataset
Uniprot Id	Gene Symbol	Description	Number of peptides	Veh_126_sn scaled	Veh_127n_sn scaled	Veh_127c_sn scaled	Veh_128n_sn scaled	5uM_128c_sn scaled	5uM_129n_sn scaled	5uM_129c_sn scaled	5uM_130n_sn scaled	25uM_130c_sn scaled	25uM_131_sn scaled	25uM_131c_sn scaled	25uM_132n_sn scaled	125uM_132c_sn scaled	125uM_133n_sn scaled	125uM_133c_sn scaled	125uM_134n_sn scaled	Average (Veh)	Average (5uM)	Average (25uM)	Average (125uM)	fold change (5uM/Veh)	fold change (25uM/Veh)	fold change (125uM/Veh)	log2 fold change (5uM/Veh)	log2 fold change (25uM/Veh)	log2 fold change (125uM/Veh)	CV (Veh)	CV (5uM)	CV (25uM)	CV (125uM)
sp|Q13228|SBP1_HUMAN	SELENBP1	SBP1_HUMAN Selenium-binding protein 1	1	5.07114	4.71894	3.01644	4.29695	4.68998	5.0341	6.99387	7.41226	8.95817	9.48198	4.38816	8.06136	4.8558	6.04241	11.2917	5.68669	4.27587	6.03255	7.72242	6.96915	1.41084	1.80605	1.62988	0.496551	0.852835	0.704766	0.209849	0.227029	0.297696	0.419604
sp|P31749|AKT1_HUMAN	AKT1	AKT1_HUMAN RAC-alpha serine/threonine-protein kinase	11	3.70558	4.05099	4.26932	4.41904	5.72277	5.91314	6.06497	6.27375	6.46709	6.85465	7.15085	7.06959	7.65871	7.89053	8.2725	8.21651	4.11123	5.99366	6.88555	8.00956	1.45787	1.67481	1.94821	0.543866	0.744	0.962152	0.0753535	0.038938	0.0443943	0.0359857
sp|Q8NEM0|MCPH1_HUMAN	MCPH1	MCPH1_HUMAN Microcephalin	1	5.14008	5.17769	5.75706	6.17473	5.63177	6.28396	4.75637	5.26739	4.32627	5.44155	12.6976	11.5547	5.93389	6.31125	4.93404	4.61162	5.56239	5.48487	8.50503	5.4477	0.986064	1.52902	0.979381	-0.0202468	0.612611	-0.0300576	0.0892397	0.117127	0.497568	0.147803
sp|P31751|AKT2_HUMAN	AKT2	AKT2_HUMAN RAC-beta serine/threonine-protein kinase	14	3.97314	4.23308	4.64297	4.9113	5.58586	5.94829	6.37777	5.96621	6.71621	6.53099	7.07739	6.63416	7.80232	7.91035	7.74552	7.94444	4.44012	5.96953	6.73969	7.85066	1.34445	1.51791	1.76812	0.427018	0.602082	0.822214	0.0941346	0.0542236	0.0352459	0.0118008
sp|Q9P0U4-2|CXXC1_HUMAN	CXXC1	CXXC1_HUMAN Isoform 2 of CpG-binding protein	3	4.29127	6.37976	6.03773	4.35414	6.55353	10.3361	8.74274	7.29038	7.27985	9.35021	9.36398	5.2387	3.47318	3.69051	4.1005	3.51738	5.26572	8.23069	7.80818	3.69539	1.56307	1.48283	0.701782	0.644381	0.568355	-0.510905	0.208541	0.203206	0.2527	0.0773645
tr|G5E9Z2|G5E9Z2_HUMAN	CLPTM1L	G5E9Z2_HUMAN Cisplatin resistance related protein CRR9p, isoform CRA_c	1	6.33012	4.03428	5.83467	4.16911	6.40535	10.9211	9.19308	6.43099	6.62294	9.70852	7.90976	5.85726	2.93338	4.40247	5.31598	3.93104	5.09204	8.23763	7.52462	4.14572	1.61774	1.47772	0.814156	0.693984	0.563374	-0.296623	0.228319	0.269038	0.223842	0.239246
sp|Q8NCM8-2|DYHC2_HUMAN	DYNC2H1	DYHC2_HUMAN Isoform 2 of Cytoplasmic dynein 2 heavy chain 1	1	3.00342	5.25081	5.92562	5.31972	6.60616	10.3327	8.99606	6.91659	5.90104	8.84577	7.00452	6.89303	3.88967	4.17316	6.86332	4.07841	4.87489	8.21288	7.16109	4.75114	1.68473	1.46897	0.974614	0.752517	0.554809	-0.0370967	0.263381	0.215174	0.17145	0.297411
sp|Q96JP0|FEM1C_HUMAN	FEM1C	FEM1C_HUMAN Protein fem-1 homolog C	1	4.76742	4.80598	5.09304	6.39069	7.17174	9.35585	6.34321	6.69872	6.81813	6.31036	10.9035	5.49845	4.71812	4.65084	5.4252	5.04879	5.26428	7.39238	7.38261	4.96074	1.40425	1.4024	0.942339	0.489802	0.487894	-0.0856823	0.145292	0.182926	0.326356	0.0715906
sp|P05423|RPC4_HUMAN	POLR3D	RPC4_HUMAN DNA-directed RNA polymerase III subunit RPC4	10	5.28822	5.30377	8.12573	6.07196	4.59961	4.96628	5.41193	4.95867	16.617	6.77879	5.04534	6.07464	4.92509	5.746	4.81626	5.27075	6.19742	4.98412	8.62894	5.18952	0.804225	1.39234	0.837369	-0.314328	0.477516	-0.256065	0.215668	0.0667286	0.622641	0.08065
sp|Q9UIF7|MUTYH_HUMAN	MUTYH	MUTYH_HUMAN A/G-specific adenine DNA glycosylase	2	5.16409	5.89544	5.1132	5.78999	6.32078	6.94641	6.08017	6.24252	5.92889	6.7708	9.45971	8.28305	5.82996	5.38459	5.15767	5.63273	5.49068	6.39747	7.61061	5.50124	1.16515	1.3861	1.00192	0.220517	0.471028	0.00277136	0.0745437	0.0593097	0.206432	0.0532035
sp|Q13164|MK07_HUMAN	MAPK7	MK07_HUMAN Mitogen-activated protein kinase 7	1	5.05271	5.86706	5.31989	5.35117	5.58221	6.06242	7.17125	6.19145	6.44821	7.10795	7.66593	8.63728	4.87739	4.15596	7.57257	6.93654	5.39771	6.25183	7.46484	5.88562	1.15824	1.38297	1.09039	0.211932	0.467765	0.124846	0.0630565	0.106632	0.124133	0.276734
sp|Q9H9L7|AKIR1_HUMAN	AKIRIN1	AKIR1_HUMAN Akirin-1	1	5.2222	5.10406	5.16939	5.66831	8.80782	5.80637	5.37311	4.44908	5.54791	5.8488	5.92274	11.9271	6.86938	5.84318	5.96071	6.47988	5.29099	6.10909	7.31164	6.28829	1.15462	1.3819	1.18849	0.207421	0.466657	0.249129	0.0484117	0.308736	0.421416	0.0757005
sp|O60909-3|B4GT2_HUMAN	B4GALT2	B4GT2_HUMAN Isoform 3 of Beta-1,4-galactosyltransferase 2	1	3.99627	5.23431	7.03628	6.84241	6.40358	5.99216	5.1559	4.9582	8.71166	8.1661	7.56585	6.20589	5.43759	7.04651	6.44102	4.8063	5.77732	5.62746	7.66238	5.93285	0.974061	1.32629	1.02692	-0.0379159	0.407392	0.0383267	0.24856	0.121637	0.14067	0.168914
sp|Q8NDX6|ZN740_HUMAN	ZNF740	ZN740_HUMAN Zinc finger protein 740	1	5.98105	5.73422	5.38234	4.43199	5.91061	7.3231	6.15396	5.45511	7.61232	7.15006	6.46782	7.21236	5.05158	7.48983	6.36423	6.27941	5.3824	6.2107	7.11064	6.29626	1.15389	1.32109	1.16979	0.206505	0.40173	0.226246	0.126257	0.128192	0.0667977	0.158261
tr|E5RG31|E5RG31_HUMAN	MCM4	E5RG31_HUMAN DNA replication licensing factor MCM4 (Fragment)	2	4.74742	5.54054	4.34383	6.23562	6.8066	8.0129	8.22528	5.23887	5.54444	5.67492	7.67619	8.05535	6.32761	5.67207	6.23943	5.65893	5.21685	7.07091	6.73773	5.97451	1.3554	1.29153	1.14523	0.438717	0.369082	0.195641	0.161336	0.194017	0.194843	0.0600326
sp|P22830-2|HEMH_HUMAN	FECH	HEMH_HUMAN Isoform 2 of Ferrochelatase, mitochondrial	26	4.64623	5.23592	5.22724	5.86798	6.12406	6.18363	6.39784	6.48649	6.79712	6.45619	7.00393	6.75074	6.60849	6.09142	7.21977	6.90295	5.24434	6.29801	6.75199	6.70566	1.20091	1.28748	1.27865	0.264133	0.364552	0.354617	0.0951516	0.0273226	0.0334477	0.0715174
sp|Q9NYP3|DONS_HUMAN	DONSON	DONS_HUMAN Protein downstream neighbor of Son	1	5.33507	4.65543	6.9741	6.50446	5.34992	5.19252	5.72961	7.81024	7.7559	10.1746	5.75975	6.33403	5.83535	6.16643	5.65194	4.77068	5.86726	6.02057	7.50607	5.6061	1.02613	1.27931	0.955488	0.0372125	0.35537	-0.0656907	0.180987	0.201679	0.262049	0.106358
sp|O00329|PK3CD_HUMAN	PIK3CD	PK3CD_HUMAN Phosphatidylinositol 4,5-bisphosphate 3-kinase catalytic subunit delta isoform	1	4.41365	5.30456	4.15965	7.87453	8.02415	6.59011	6.14992	5.68458	6.84731	5.61363	7.54254	7.79825	6.61186	4.15738	5.04935	8.17853	5.4381	6.61219	6.95043	5.99928	1.2159	1.2781	1.10319	0.282026	0.354001	0.141687	0.312031	0.152947	0.140652	0.295359
sp|Q2TB18|ASTE1_HUMAN	ASTE1	ASTE1_HUMAN Protein asteroid homolog 1	1	5.89229	5.50847	4.80514	5.22998	7.31299	5.93177	7.19677	6.59571	5.80227	7.96687	6.79376	6.80026	6.47295	7.0551	5.65588	4.97979	5.35897	6.75931	6.84079	6.04093	1.26131	1.27651	1.12726	0.33492	0.352207	0.172815	0.0855222	0.0939385	0.129392	0.150796
sp|Q13045-2|FLII_HUMAN	FLII	FLII_HUMAN Isoform 2 of Protein flightless-1 homolog	2	5.22823	5.38858	5.23596	5.85877	6.29099	7.07039	7.17083	6.28272	6.32798	7.01848	6.85879	7.37148	5.95722	6.02131	6.58333	5.33495	5.42788	6.70373	6.89418	5.9742	1.23505	1.27014	1.10065	0.304574	0.344989	0.138356	0.0546427	0.0720679	0.0629534	0.0854702
sp|O14682|ENC1_HUMAN	ENC1	ENC1_HUMAN Ectoderm-neural cortex protein 1	1	6.18604	6.15617	4.48652	5.47197	6.08601	7.22743	7.05723	7.28513	8.33217	6.2434	7.37115	6.243	5.6509	6.54017	5.10846	4.55426	5.57517	6.91395	7.04743	5.46345	1.24013	1.26407	0.97996	0.310493	0.33808	-0.0292055	0.142989	0.0810498	0.143048	0.154846
sp|Q06730-2|ZN33A_HUMAN	ZNF33A	ZN33A_HUMAN Isoform 2 of Zinc finger protein 33A	1	6.39206	4.6728	5.3331	5.47233	6.53753	6.11935	5.61952	5.654	5.30618	7.96314	6.00693	8.19287	6.11178	7.90193	6.61986	6.09661	5.46757	5.9826	6.86728	6.68254	1.0942	1.256	1.22221	0.129872	0.328838	0.289497	0.129519	0.0726326	0.208245	0.126974
sp|P49758-3|RGS6_HUMAN	RGS6	RGS6_HUMAN Isoform 3 of Regulator of G-protein signaling 6	1	4.8401	4.08906	6.96322	6.92021	5.52147	7.493	7.1982	6.65921	7.43687	5.95789	6.80412	8.40689	5.0546	5.06983	5.76053	5.82479	5.70315	6.71797	7.15144	5.42744	1.17794	1.25395	0.951657	0.236267	0.326476	-0.0714871	0.256486	0.12938	0.144481	0.0778606
sp|P08754|GNAI3_HUMAN	GNAI3	GNAI3_HUMAN Guanine nucleotide-binding protein G(k) subunit alpha	1	4.12053	5.19802	5.47275	6.66467	7.15398	5.94526	6.55827	7.15435	6.77139	6.95635	6.62914	6.51511	5.42744	7.09928	7.23054	5.10291	5.36399	6.70297	6.718	6.21504	1.24962	1.25242	1.15866	0.321492	0.324724	0.212457	0.194855	0.086229	0.0283372	0.177969
sp|Q4KMG0|CDON_HUMAN	CDON	CDON_HUMAN Cell adhesion molecule-related/down-regulated by oncogenes	1	6.18267	5.74445	4.38689	4.83243	5.84699	6.67237	6.62353	6.79332	7.87823	5.07329	7.10331	6.40546	5.03386	8.71057	8.10882	4.60381	5.28661	6.48405	6.61507	6.61427	1.2265	1.25129	1.25114	0.294553	0.323414	0.323238	0.155536	0.0664188	0.180033	0.316748
sp|Q9H469|FXL15_HUMAN	FBXL15	FXL15_HUMAN F-box/LRR-repeat protein 15	1	3.78278	7.11786	5.23355	6.22686	6.02661	6.22942	6.62161	4.21058	6.87317	5.35851	7.09	8.64347	6.16942	7.53097	5.31577	7.56943	5.59026	5.77205	6.99129	6.6464	1.03252	1.25062	1.18892	0.046169	0.322642	0.249657	0.255767	0.185355	0.192246	0.165561
sp|Q53FZ2|ACSM3_HUMAN	ACSM3	ACSM3_HUMAN Acyl-coenzyme A synthetase ACSM3, mitochondrial	3	5.04293	5.21639	5.69868	6.61777	6.30042	6.61743	6.72378	7.39837	6.82773	6.52622	7.33946	7.50733	5.67548	5.06342	5.96438	5.4802	5.64394	6.76	7.05018	5.54587	1.19774	1.24916	0.982623	0.26032	0.320958	-0.0252895	0.125092	0.0683451	0.0643089	0.0681881
sp|Q86VU5|CMTD1_HUMAN	COMTD1	CMTD1_HUMAN Catechol O-methyltransferase domain-containing protein 1	1	5.09421	7.49847	5.18606	6.99487	5.15614	5.99277	4.90071	5.79521	9.79588	7.82231	7.14002	6.07158	5.73908	5.79775	5.56678	5.44816	6.1934	5.46121	7.70745	5.63794	0.881778	1.24446	0.910314	-0.181512	0.315521	-0.135563	0.19925	0.0946366	0.203397	0.0283881
sp|Q14147|DHX34_HUMAN	DHX34	DHX34_HUMAN Probable ATP-dependent RNA helicase DHX34	5	5.26146	6.04388	5.40641	6.43286	6.03078	6.18692	6.32647	6.36819	6.09112	9.35373	6.15753	7.19796	5.05637	4.58632	6.14108	7.35893	5.78615	6.22809	7.20008	5.78568	1.07638	1.24436	0.999917	0.106185	0.31541	-0.000119063	0.0948795	0.0245146	0.211469	0.213367
sp|Q9NV35|NUD15_HUMAN	NUDT15	NUD15_HUMAN Probable 8-oxo-dGTP diphosphatase NUDT15	5	4.70461	5.86818	5.55789	6.61753	6.41151	6.68593	6.87622	6.93453	6.93573	6.62374	7.4619	7.27499	5.89455	5.00092	5.91957	5.23221	5.68705	6.72705	7.07409	5.51181	1.18287	1.24389	0.969186	0.242292	0.314863	-0.0451543	0.139215	0.0350264	0.0524318	0.0845765
sp|Q96B42|TMM18_HUMAN	TMEM18	TMM18_HUMAN Transmembrane protein 18	1	4.81087	6.55519	5.66195	5.504	6.5127	7.19012	6.67413	6.28504	7.26562	6.46037	7.3793	6.91398	5.66735	5.59426	5.665	5.86011	5.633	6.6655	7.00482	5.69668	1.18329	1.24353	1.0113	0.242808	0.314443	0.0162173	0.127349	0.0576772	0.0590298	0.0200309
sp|A2RUC4|TYW5_HUMAN	TYW5	TYW5_HUMAN tRNA wybutosine-synthesizing protein 5	2	4.43027	5.59142	5.98083	6.25114	5.85189	5.55604	6.44033	7.12149	6.42754	6.65287	6.7613	7.73817	6.66284	5.7682	6.43183	6.33385	5.56341	6.24244	6.89497	6.29918	1.12205	1.23934	1.13225	0.166139	0.309574	0.179193	0.144245	0.110814	0.083984	0.0603104
sp|Q08999|RBL2_HUMAN	RBL2	RBL2_HUMAN Retinoblastoma-like protein 2	1	4.84188	7.06776	4.42934	6.66318	5.22279	6.22672	8.05331	5.278	7.65255	9.32214	6.23229	5.27205	6.51073	5.21865	5.66406	6.34455	5.75054	6.1952	7.11976	5.9345	1.07733	1.2381	1.03199	0.107455	0.308131	0.0454284	0.227604	0.213337	0.247773	0.101373
sp|P42338|PK3CB_HUMAN	PIK3CB	PK3CB_HUMAN Phosphatidylinositol 4,5-bisphosphate 3-kinase catalytic subunit beta isoform	7	4.8048	5.24069	5.54665	6.1599	5.99643	6.37627	6.27041	6.45154	7.00013	6.56963	6.68702	6.66979	6.72806	6.0583	6.84998	6.59039	5.43801	6.27366	6.73164	6.55668	1.15367	1.23789	1.20571	0.206229	0.30788	0.269887	0.104717	0.0317512	0.0276789	0.0531926
sp|Q9BYE7|PCGF6_HUMAN	PCGF6	PCGF6_HUMAN Polycomb group RING finger protein 6	1	5.65787	5.64212	6.01571	5.34089	7.33389	6.30176	6.54401	6.59261	7.15153	6.84194	6.848	7.18097	5.07082	4.88415	7.02222	5.57149	5.66415	6.69307	7.00561	5.63717	1.18165	1.23683	0.995237	0.240809	0.306652	-0.00688776	0.0487369	0.0665991	0.0265354	0.171699
sp|Q86TG7|PEG10_HUMAN	PEG10	PEG10_HUMAN Retrotransposon-derived protein PEG10	1	4.86996	5.78206	5.50133	6.74019	5.82586	7.17846	8.75752	5.38705	5.2899	6.83382	8.30579	7.88453	5.28508	4.14836	6.59609	5.61398	5.72339	6.78722	7.07851	5.41088	1.18588	1.23677	0.945398	0.245953	0.306577	-0.0810061	0.135901	0.223767	0.189798	0.186522
sp|Q5U5Q3|MEX3C_HUMAN	MEX3C	MEX3C_HUMAN RNA-binding E3 ubiquitin-protein ligase MEX3C	2	5.64313	6.85731	5.3947	4.87578	6.02662	7.08992	6.35882	5.70369	7.01088	7.36717	7.69853	6.08235	5.98789	5.79602	6.12546	5.98173	5.69273	6.29476	7.03973	5.97278	1.10575	1.23662	1.04919	0.145031	0.3064	0.0692807	0.147492	0.0943257	0.0990507	0.0226415
sp|P51790|CLCN3_HUMAN	CLCN3	CLCN3_HUMAN H(+)/Cl(-) exchange transporter 3	1	5.39005	5.69297	5.47669	6.61996	6.17599	6.27103	6.18795	6.78772	7.22146	6.80814	6.64699	7.94332	5.54326	5.61288	5.11787	6.5037	5.79492	6.35567	7.15498	5.69443	1.09677	1.2347	0.982659	0.133257	0.304159	-0.0252373	0.0974279	0.0458042	0.0808635	0.102239
sp|Q9H9S4|CB39L_HUMAN	CAB39L	CB39L_HUMAN Calcium-binding protein 39-like	1	5.9617	5.22529	4.81388	5.82199	6.98292	6.29399	6.46042	6.65517	6.46698	5.74904	6.60919	8.04704	5.63119	6.30967	7.25107	5.72048	5.45572	6.59812	6.71806	6.2281	1.2094	1.23138	1.14157	0.274288	0.300277	0.191024	0.0978652	0.0448556	0.143293	0.119692
tr|F8VQY0|F8VQY0_HUMAN	ATP5B	F8VQY0_HUMAN ATP synthase subunit beta, mitochondrial (Fragment)	1	5.89723	4.19729	4.34226	6.66	7.49749	6.11576	6.57487	5.93447	5.07136	6.30542	6.86192	7.67306	6.22586	6.04791	5.79084	8.80427	5.27419	6.53065	6.47794	6.71722	1.23823	1.22823	1.2736	0.308275	0.296584	0.348913	0.227966	0.106979	0.168727	0.208833
sp|Q9BQ65|USB1_HUMAN	USB1	USB1_HUMAN U6 snRNA phosphodiesterase	2	4.60693	5.18516	6.23165	6.20902	6.22708	6.13896	7.18329	7.12849	6.69682	6.40258	6.5155	7.62301	5.39902	5.6612	6.40102	6.39026	5.55819	6.66946	6.80948	5.96288	1.19993	1.22512	1.07281	0.262954	0.292929	0.101393	0.143976	0.084457	0.0816116	0.0857082
sp|O43861|ATP9B_HUMAN	ATP9B	ATP9B_HUMAN Probable phospholipid-transporting ATPase IIB	1	4.52593	6.44003	6.45335	5.84866	8.11248	6.41518	6.78031	6.27029	6.74552	6.76014	8.01609	6.93485	4.96884	5.61695	5.80118	4.31018	5.81699	6.89457	7.11415	5.17429	1.18525	1.22299	0.889512	0.245186	0.290418	-0.168913	0.155702	0.121809	0.0853811	0.130975
sp|P07738|PMGE_HUMAN	BPGM	PMGE_HUMAN Bisphosphoglycerate mutase	3	4.98276	5.04576	6.36852	6.10636	5.70471	6.98189	6.49499	5.83671	6.23543	6.85007	7.3689	7.03997	6.60927	5.59587	5.98164	6.79714	5.62585	6.25457	6.87359	6.24598	1.11176	1.22179	1.11023	0.152841	0.288993	0.150857	0.127044	0.0952053	0.0693059	0.0890589
sp|Q9Y5V3-2|MAGD1_HUMAN	MAGED1	MAGD1_HUMAN Isoform 2 of Melanoma-associated antigen D1	2	5.24995	6.0328	5.85672	6.36044	6.25761	6.55457	6.83965	6.88086	7.25353	6.68396	7.48332	7.26501	5.28581	5.39592	5.8994	4.70046	5.87498	6.63317	7.17145	5.3204	1.12905	1.22068	0.905603	0.175116	0.287683	-0.143049	0.0793259	0.0436249	0.0476556	0.0924918
sp|Q96T60|PNKP_HUMAN	PNKP	PNKP_HUMAN Bifunctional polynucleotide phosphatase/kinase	14	4.90571	5.53606	5.92081	6.35291	6.01117	6.66415	6.97308	7.31161	6.69673	6.32561	7.49727	7.18523	5.83923	4.8743	6.38089	5.52522	5.67887	6.74	6.92621	5.65491	1.18686	1.21965	0.99578	0.247145	0.286462	-0.00610046	0.108122	0.0820735	0.0748631	0.111243
sp|Q5BJF6|ODFP2_HUMAN	ODF2	ODFP2_HUMAN Outer dense fiber protein 2	1	6.31997	5.47009	5.14137	6.33349	5.59299	6.74667	5.58898	6.52407	7.48514	6.83536	6.83508	7.18546	6.11404	5.59417	6.20554	6.02757	5.81623	6.11318	7.08526	5.98533	1.05105	1.21819	1.02907	0.0718381	0.284736	0.0413465	0.103948	0.0997497	0.0442571	0.0452286
tr|Q5T9W8|Q5T9W8_HUMAN	HSP90AB1	Q5T9W8_HUMAN Heat shock protein HSP 90-beta (Fragment)	1	4.26169	5.68905	6.42452	6.9348	5.71453	7.66762	6.32415	7.03586	7.8754	7.44959	7.6212	5.40193	5.31342	6.01885	4.88119	5.38621	5.82752	6.68554	7.08703	5.39992	1.14724	1.21613	0.926624	0.198163	0.2823	-0.109943	0.199466	0.12694	0.160425	0.0868494
sp|Q969T7|5NT3B_HUMAN	NT5C3B	5NT3B_HUMAN 7-methylguanosine phosphate-specific 5'-nucleotidase	6	4.90473	5.68909	6.08839	5.7929	6.10056	6.71007	6.96513	6.89123	6.63766	6.7704	6.5809	7.32112	6.33899	5.4416	6.25525	5.512	5.61878	6.66675	6.82752	5.88696	1.18651	1.21513	1.04773	0.246727	0.281105	0.0672666	0.0899117	0.0588552	0.0495806	0.080808
sp|O14678|ABCD4_HUMAN	ABCD4	ABCD4_HUMAN ATP-binding cassette sub-family D member 4	1	3.97644	5.48585	6.48577	6.68287	6.85716	8.79285	6.97696	6.03122	6.4803	7.33362	8.12706	5.51415	5.19447	5.69013	5.06779	5.30336	5.65773	7.16455	6.86378	5.31394	1.26633	1.21317	0.939234	0.340652	0.27878	-0.0904427	0.218694	0.162482	0.163651	0.0505528
tr|C9JZG2|C9JZG2_HUMAN	GART	C9JZG2_HUMAN Phosphoribosylformylglycinamidine cyclo-ligase (Fragment)	1	4.93399	5.73706	5.86453	6.36626	7.11313	7.59529	6.71282	7.04892	7.29153	7.68275	6.96819	5.83648	5.73592	5.70166	4.9221	4.48937	5.72546	7.11754	6.94474	5.21226	1.24314	1.21296	0.910366	0.313987	0.278529	-0.135482	0.10365	0.0510952	0.114404	0.117251
tr|H0Y400|H0Y400_HUMAN	DDX39B	H0Y400_HUMAN Spliceosome RNA helicase DDX39B (Fragment)	1	4.67325	4.23778	5.47796	6.77168	6.83159	8.11261	7.69745	5.16972	4.82876	6.5358	7.35121	6.95015	6.04126	5.71376	5.763	7.84405	5.29017	6.95284	6.41648	6.34052	1.3143	1.21291	1.19855	0.39429	0.278469	0.261287	0.210445	0.187411	0.172929	0.159714
sp|P30989|NTR1_HUMAN	NTSR1	NTR1_HUMAN Neurotensin receptor type 1	1	4.92628	5.06915	6.51077	5.36635	6.48573	7.37225	5.62395	6.69922	6.43963	7.89625	5.83569	6.35644	5.26111	7.54175	6.57913	6.03628	5.46814	6.54529	6.632	6.35457	1.19699	1.21284	1.16211	0.259407	0.278395	0.216744	0.131462	0.110171	0.133322	0.150853
sp|Q86XE3|MICU3_HUMAN	MICU3	MICU3_HUMAN Calcium uptake protein 3, mitochondrial	1	4.74748	5.40289	6.35458	7.14892	6.29957	6.41534	6.51738	7.42362	7.35756	6.2803	8.04967	6.95252	5.91558	4.78159	5.18376	5.16925	5.91347	6.66398	7.16001	5.26254	1.12692	1.2108	0.889925	0.172379	0.275958	-0.168244	0.178461	0.077159	0.103498	0.0899806
sp|Q96IK0|TM101_HUMAN	TMEM101	TM101_HUMAN Transmembrane protein 101	1	5.276	5.3812	6.09973	6.50392	7.14354	6.34703	6.52927	7.48907	7.09365	7.22067	7.28465	6.52938	4.8288	4.99325	5.31588	5.96397	5.81521	6.87723	7.03209	5.27548	1.18263	1.20926	0.907185	0.241995	0.274121	-0.140531	0.100975	0.0772832	0.048977	0.0950827
sp|P52306-4|GDS1_HUMAN	RAP1GDS1	GDS1_HUMAN Isoform 4 of Rap1 GTPase-GDP dissociation stimulator 1	1	4.63934	5.45991	6.38903	6.40029	6.14384	6.6582	7.17381	6.42111	7.36739	6.46387	6.50757	7.33135	5.47074	5.70668	6.0528	5.81407	5.72214	6.59924	6.91755	5.76107	1.15328	1.20891	1.0068	0.205744	0.273705	0.00978199	0.147802	0.0662093	0.0721592	0.041943
sp|Q86TB9|PATL1_HUMAN	PATL1	PATL1_HUMAN Protein PAT1 homolog 1	15	4.84033	5.71756	6.02754	6.3763	6.12824	6.80045	6.63633	6.6597	6.3877	6.33001	7.78997	7.24778	5.70458	4.89882	6.61781	5.8369	5.74043	6.55618	6.93886	5.76453	1.14211	1.20877	1.0042	0.191696	0.27354	0.00604292	0.114563	0.0448979	0.101711	0.122107
tr|M0QYM7|M0QYM7_HUMAN	TUBB4A	M0QYM7_HUMAN Tubulin beta-4A chain (Fragment)	1	5.61881	5.24881	5.72698	6.69409	7.62823	6.84845	6.38669	6.05194	6.97632	7.84707	7.60355	5.67946	6.10121	5.27949	4.87717	5.43174	5.82217	6.72883	7.0266	5.4224	1.15572	1.20687	0.931337	0.208798	0.271269	-0.102625	0.10585	0.101467	0.138063	0.0939499
tr|B4E3L0|B4E3L0_HUMAN	SMU1	B4E3L0_HUMAN WD40 repeat-containing protein SMU1	2	6.19569	6.29403	5.30398	4.95531	6.72464	9.49461	8.20031	6.79755	6.79447	8.36376	6.66359	5.60322	4.58729	4.24729	5.37091	4.40335	5.68725	7.80428	6.85626	4.65221	1.37224	1.20555	0.818007	0.456533	0.26969	-0.289816	0.116161	0.168587	0.165947	0.107234
sp|O15120|PLCB_HUMAN	AGPAT2	PLCB_HUMAN 1-acyl-sn-glycerol-3-phosphate acyltransferase beta	1	5.51523	4.73669	6.01953	5.71135	7.01649	7.30089	6.92818	6.02274	5.2226	6.93166	7.39835	6.93046	5.67495	6.16131	5.78669	6.64287	5.4957	6.81707	6.62077	6.06645	1.24044	1.20472	1.10385	0.31085	0.268695	0.14255	0.0995187	0.0811078	0.144664	0.0720285
sp|Q14166|TTL12_HUMAN	TTLL12	TTL12_HUMAN Tubulin--tyrosine ligase-like protein 12	38	4.74993	5.76387	5.73706	6.4524	6.41271	6.65119	7.00079	7.55549	6.68296	6.40757	7.18045	7.07325	5.68418	4.7798	6.34873	5.51962	5.67582	6.90504	6.83606	5.58308	1.21657	1.20442	0.983662	0.282823	0.268337	-0.0237657	0.123408	0.0718818	0.052193	0.115419
sp|Q9NRG4|SMYD2_HUMAN	SMYD2	SMYD2_HUMAN N-lysine methyltransferase SMYD2	3	4.95149	6.05983	5.85419	6.6602	5.86244	6.28085	6.69578	7.05734	7.19163	6.84116	7.19957	7.09892	5.8755	5.0695	5.74218	5.55943	5.88143	6.4741	7.08282	5.56165	1.10077	1.20427	0.94563	0.138514	0.268158	-0.0806528	0.120381	0.0798027	0.0236432	0.0634264
sp|Q96NZ8|WFKN1_HUMAN	WFIKKN1	WFKN1_HUMAN WAP, Kazal, immunoglobulin, Kunitz and NTR domain-containing protein 1	1	5.5527	4.49025	4.4399	7.11263	7.8254	8.04101	8.32079	4.88869	5.11739	6.1488	6.80185	7.92445	6.52204	5.00857	5.37186	6.43365	5.39887	7.26897	6.49812	5.83403	1.34639	1.20361	1.0806	0.429094	0.267365	0.111835	0.231983	0.220081	0.18111	0.130085
sp|Q86VX9|MON1A_HUMAN	MON1A	MON1A_HUMAN Vacuolar fusion protein MON1 homolog A	2	5.46443	5.51821	5.87919	6.02507	7.5462	5.73044	6.39861	7.30487	6.39306	6.85788	7.77764	6.49961	5.10742	5.36302	5.8919	6.24244	5.72173	6.74503	6.88205	5.65119	1.17885	1.20279	0.987673	0.237375	0.266388	-0.0178942	0.047803	0.12418	0.0914401	0.0905896
sp|Q9H6S3-2|ES8L2_HUMAN	EPS8L2	ES8L2_HUMAN Isoform 2 of Epidermal growth factor receptor kinase substrate 8-like protein 2	1	6.14649	5.31151	5.99178	5.04142	6.54716	6.73138	6.99048	6.76511	6.01736	7.70786	7.44736	5.87926	6.14324	5.56189	6.04943	5.66827	5.6228	6.75853	6.76296	5.85571	1.20199	1.20277	1.04142	0.265421	0.266366	0.0585548	0.0944045	0.0269135	0.140227	0.0484693
sp|O75084|FZD7_HUMAN	FZD7	FZD7_HUMAN Frizzled-7	1	4.99479	4.83929	5.97787	6.16125	5.95748	6.58577	7.22392	7.27815	6.36104	6.97427	6.58573	6.48415	6.77023	5.83382	5.97639	5.99585	5.4933	6.76133	6.6013	6.14407	1.23083	1.2017	1.11847	0.299634	0.265077	0.161522	0.122442	0.0918921	0.0401553	0.0689513
sp|Q9NRG7|D39U1_HUMAN	SDR39U1	D39U1_HUMAN Epimerase family protein SDR39U1	7	4.88709	5.43925	5.912	6.25964	6.15263	6.76855	7.14081	7.2105	6.45101	6.0645	7.47663	7.03912	5.72145	4.73065	6.97366	5.7725	5.6245	6.81812	6.75781	5.79957	1.21222	1.2015	1.03113	0.277651	0.264833	0.0442211	0.105891	0.0710205	0.0924369	0.15828
sp|Q8TDM6|DLG5_HUMAN	DLG5	DLG5_HUMAN Disks large homolog 5	1	5.64135	5.18969	4.90933	6.70587	6.5712	7.09876	5.48423	7.03108	6.78569	6.87773	6.38455	6.9148	5.70994	5.85653	5.98048	6.85877	5.61156	6.54632	6.74069	6.10143	1.16658	1.20122	1.0873	0.222282	0.264495	0.120746	0.140676	0.113933	0.0361318	0.0847113
sp|Q8N461|FXL16_HUMAN	FBXL16	FXL16_HUMAN F-box/LRR-repeat protein 16	1	4.62319	4.99818	6.4819	6.31667	5.77368	5.45341	6.52552	6.74522	6.54702	6.46972	6.91989	6.99378	7.22677	5.70875	6.65108	6.56521	5.60498	6.12446	6.7326	6.53795	1.09268	1.20118	1.16645	0.127872	0.264454	0.222128	0.166336	0.0997454	0.0390007	0.095747
sp|Q5VV41|ARHGG_HUMAN	ARHGEF16	ARHGG_HUMAN Rho guanine nucleotide exchange factor 16	17	4.91273	5.77306	5.90049	6.5984	6.04833	6.58415	6.9808	7.10041	6.97805	6.59448	7.22116	7.0415	5.87135	4.87531	5.87569	5.6441	5.79617	6.67842	6.9588	5.56661	1.15221	1.20059	0.960395	0.204407	0.263738	-0.0583003	0.119342	0.0710475	0.0379089	0.0850411
sp|Q96LW7|BINCA_HUMAN	C9orf89	BINCA_HUMAN Bcl10-interacting CARD protein	1	5.73509	6.63841	5.65351	5.47383	5.2844	5.92384	5.87518	5.54954	6.59432	7.97019	6.73105	6.91248	7.45282	5.87238	6.90073	5.43223	5.87521	5.65824	7.05201	6.41454	0.96307	1.2003	1.0918	-0.054287	0.263394	0.126705	0.088571	0.0529393	0.088746	0.144383
sp|Q8WVE0|N6MT2_HUMAN	N6AMT2	N6MT2_HUMAN N(6)-adenine-specific DNA methyltransferase 2	1	5.64494	6.81638	4.64105	6.27298	5.86162	6.7296	7.58748	6.18373	7.5213	6.83295	6.08384	7.60405	5.27155	5.48052	5.71854	5.74947	5.84384	6.59061	7.01054	5.55502	1.12779	1.19965	0.950577	0.173495	0.262608	-0.073124	0.159802	0.114556	0.100979	0.0403141
sp|Q9BV86|NTM1A_HUMAN	NTMT1	NTM1A_HUMAN N-terminal Xaa-Pro-Lys N-methyltransferase 1	9	4.80398	5.78889	5.87587	6.50568	5.84646	6.61852	6.57339	7.08782	6.60193	6.48117	7.06602	7.36425	5.87156	5.0491	6.62499	5.84038	5.74361	6.53155	6.87834	5.84651	1.13719	1.19757	1.01792	0.185468	0.260104	0.0256185	0.122421	0.0784718	0.059677	0.110078
sp|Q9NUA8|ZBT40_HUMAN	ZBTB40	ZBT40_HUMAN Zinc finger and BTB domain-containing protein 40	3	4.92681	6.0988	5.29898	6.85523	6.48914	6.24601	6.48468	6.38666	6.80253	6.58445	6.75822	7.61007	5.27942	6.35297	6.14975	5.6763	5.79495	6.40162	6.93882	5.86461	1.10469	1.19739	1.01202	0.14364	0.259892	0.0172377	0.148317	0.01781	0.0659033	0.0822313
sp|P17081|RHOQ_HUMAN	RHOQ	RHOQ_HUMAN Rho-related GTP-binding protein RhoQ	1	5.13402	5.73597	6.25236	6.09217	6.12325	6.54896	6.02874	6.30273	7.38292	7.00014	6.49568	6.87745	6.40234	5.58456	5.79789	6.24081	5.80363	6.25092	6.93905	6.0064	1.07707	1.19564	1.03494	0.107113	0.257782	0.049545	0.085436	0.0366175	0.0526961	0.0632616
sp|Q86W47|KCMB4_HUMAN	KCNMB4	KCMB4_HUMAN Calcium-activated potassium channel subunit beta-4	1	5.66436	6.7668	4.49054	5.7928	6.24544	5.63945	4.87896	7.93738	6.15764	6.51531	5.07921	9.36261	5.47658	7.45692	7.5443	4.99171	5.67863	6.17531	6.77869	6.36738	1.08747	1.19372	1.12129	0.120969	0.255465	0.165158	0.16422	0.210671	0.269604	0.207921
sp|Q9BZE1|RM37_HUMAN	MRPL37	RM37_HUMAN 39S ribosomal protein L37, mitochondrial	20	4.71639	5.62825	6.10818	6.64688	6.27056	6.51582	7.06283	7.46846	6.76884	6.25158	7.36699	7.17536	5.53584	4.54346	6.4265	5.51405	5.77492	6.82942	6.89069	5.50496	1.1826	1.19321	0.953253	0.24196	0.254847	-0.0690695	0.141858	0.0790119	0.0716468	0.139719
sp|Q9Y5Y0|FLVC1_HUMAN	FLVCR1	FLVC1_HUMAN Feline leukemia virus subgroup C receptor-related protein 1	2	4.96075	6.19931	5.6531	5.64088	7.06067	6.63398	5.51816	5.86854	6.61877	6.51457	7.27098	6.38349	5.21546	7.47835	6.7864	6.1966	5.61351	6.27034	6.69695	6.4192	1.11701	1.19301	1.14353	0.15964	0.254602	0.193491	0.0903428	0.11217	0.0589233	0.149291
sp|P43897|EFTS_HUMAN	TSFM	EFTS_HUMAN Elongation factor Ts, mitochondrial	16	5.10775	6.19898	5.56355	5.71095	6.81056	8.28391	7.43575	7.12622	6.60422	7.24583	7.02641	6.06176	5.38888	4.74463	5.69323	4.99738	5.64531	7.41411	6.73456	5.20603	1.31332	1.19295	0.922187	0.393221	0.25453	-0.116869	0.0796475	0.0854525	0.0774523	0.0805248
sp|Q06609|RAD51_HUMAN	RAD51	RAD51_HUMAN DNA repair protein RAD51 homolog 1	5	5.2301	5.94805	5.80243	6.35597	6.1493	6.24823	6.3121	6.95204	7.11826	6.59668	7.37038	6.74752	5.91738	5.27697	5.77659	6.19801	5.83414	6.41542	6.95821	5.79224	1.09963	1.19267	0.992818	0.137024	0.254197	-0.0103986	0.0798553	0.0567326	0.0505116	0.0665715
tr|E5RIS0|E5RIS0_HUMAN	FBXL8	E5RIS0_HUMAN F-box/LRR-repeat protein 8 (Fragment)	1	5.39892	5.76019	5.99455	6.42164	6.81482	6.65595	7.11287	7.22288	7.27393	7.37926	6.87389	6.57544	5.48578	5.28804	4.93245	4.80939	5.89383	6.95163	7.02563	5.12892	1.17948	1.19203	0.870218	0.238147	0.253423	-0.200551	0.0727485	0.0376695	0.0527734	0.0609706
sp|Q9Y496|KIF3A_HUMAN	KIF3A	KIF3A_HUMAN Kinesin-like protein KIF3A	8	4.80145	5.76457	5.664	6.58942	6.22527	6.40761	7.00142	7.1467	6.60741	6.32625	7.18573	7.06412	6.04338	4.90241	6.4145	5.85576	5.70486	6.69525	6.79588	5.80401	1.1736	1.19124	1.01738	0.230946	0.252468	0.0248591	0.128166	0.0668605	0.0588598	0.111018
sp|P00846|ATP6_HUMAN	MT-ATP6	ATP6_HUMAN ATP synthase subunit a	2	5.31581	5.83955	5.92183	6.84804	5.77825	6.35578	7.28646	7.40551	8.18911	6.96141	6.90259	6.41453	5.12999	5.03608	5.24687	5.36819	5.98131	6.7065	7.11691	5.19528	1.12124	1.18986	0.868586	0.165099	0.25079	-0.203259	0.106518	0.115808	0.106178	0.0277083
sp|A6NFI3|ZN316_HUMAN	ZNF316	ZN316_HUMAN Zinc finger protein 316	2	4.40266	6.27201	6.41919	5.90366	6.10329	6.70279	7.28358	7.39379	7.40924	6.6015	7.85373	5.49573	5.82317	6.49647	5.5981	4.2411	5.74938	6.87086	6.84005	5.53971	1.19506	1.1897	0.963532	0.257085	0.2506	-0.0535959	0.160648	0.0865621	0.151361	0.170792
sp|P49411|EFTU_HUMAN	TUFM	EFTU_HUMAN Elongation factor Tu, mitochondrial	60	5.0733	5.99389	5.58057	6.04115	6.70955	7.11541	6.82497	7.00599	6.86814	6.75006	6.84181	6.51587	6.04388	5.02678	6.12339	5.48523	5.67223	6.91398	6.74397	5.66982	1.21892	1.18895	0.999576	0.285601	0.249683	-0.000612462	0.0792807	0.0262415	0.0237646	0.0906916
sp|Q7L804|RFIP2_HUMAN	RAB11FIP2	RFIP2_HUMAN Rab11 family-interacting protein 2	1	6.261	5.42239	7.51417	4.27995	6.91637	6.71524	4.70036	6.69428	7.77308	6.10413	6.39725	7.61815	7.60855	4.60829	6.04633	5.34046	5.86938	6.25656	6.97315	5.90091	1.06597	1.18806	1.00537	0.0921627	0.248604	0.00772934	0.232461	0.166591	0.121199	0.217069
sp|Q2PPJ7|RGPA2_HUMAN	RALGAPA2	RGPA2_HUMAN Ral GTPase-activating protein subunit alpha-2	1	5.14072	5.78225	5.91608	6.2614	6.76438	7.59621	5.83353	6.56563	6.15397	6.1217	6.92022	8.2473	6.49852	4.37044	6.09661	5.73104	5.77511	6.68994	6.8608	5.67415	1.15841	1.18799	0.982518	0.212144	0.248527	-0.0254441	0.0811471	0.108333	0.145069	0.162832
sp|Q9Y223-2|GLCNE_HUMAN	GNE	GLCNE_HUMAN Isoform 2 of Bifunctional UDP-N-acetylglucosamine 2-epimerase/N-acetylmannosamine kinase	9	5.28757	5.75373	5.66383	6.14974	6.81487	7.23503	6.99425	6.54662	6.7668	7.01118	6.64922	6.71388	5.79247	5.44474	5.86211	5.31395	5.71372	6.89769	6.78527	5.60332	1.20722	1.18754	0.980678	0.271684	0.247977	-0.0281485	0.0619445	0.0421206	0.0232998	0.0474008
tr|B0QYA4|B0QYA4_HUMAN	EIF3D	B0QYA4_HUMAN Eukaryotic translation initiation factor 3 subunit D (Fragment)	1	5.26752	6.37953	5.0004	6.85904	6.98407	6.05121	6.50198	6.47251	7.09422	6.65161	6.86607	7.30019	7.24304	5.40725	5.91194	4.00943	5.87662	6.50244	6.97802	5.64292	1.10649	1.18742	0.960231	0.145995	0.247831	-0.0585466	0.150826	0.0586599	0.0402259	0.236799
sp|P43250-2|GRK6_HUMAN	GRK6	GRK6_HUMAN Isoform GRK6B of G protein-coupled receptor kinase 6	4	4.79761	5.60536	6.10633	6.41538	6.87821	7.17404	6.23292	6.50937	6.79431	6.81606	6.8649	6.73311	5.97872	5.46686	6.17157	5.45525	5.73117	6.69864	6.80209	5.7681	1.16881	1.18686	1.00644	0.225037	0.247149	0.00926649	0.123225	0.0616099	0.00803391	0.0629691
sp|Q9NWW5|CLN6_HUMAN	CLN6	CLN6_HUMAN Ceroid-lipofuscinosis neuronal protein 6	2	4.84194	6.19888	5.10181	6.66372	6.57042	6.68637	6.27934	5.81732	6.72541	6.46069	7.07205	6.79898	6.65866	5.61719	6.52655	5.98067	5.70159	6.33836	6.76428	6.19577	1.11168	1.18639	1.08667	0.152747	0.246573	0.119919	0.152624	0.061099	0.0371656	0.0782254
sp|Q92598-2|HS105_HUMAN	HSPH1	HS105_HUMAN Isoform Beta of Heat shock protein 105 kDa	2	4.33497	5.15212	6.40428	6.28226	5.53062	7.15985	5.93358	7.1917	5.7898	7.09311	6.27011	7.13225	7.46108	5.73241	6.45362	6.07824	5.54341	6.45394	6.57132	6.43134	1.16425	1.18543	1.16018	0.219407	0.24541	0.214346	0.177376	0.131654	0.0997272	0.116151
sp|Q9BT30|ALKB7_HUMAN	ALKBH7	ALKB7_HUMAN Alpha-ketoglutarate-dependent dioxygenase alkB homolog 7, mitochondrial	2	4.93691	5.49617	6.18676	6.35301	6.25546	6.33584	6.70763	7.15985	6.16455	6.25683	7.62613	7.18311	6.13499	5.1073	6.3769	5.71855	5.74321	6.61469	6.80765	5.83444	1.15174	1.18534	1.01588	0.203817	0.2453	0.022735	0.113722	0.0624937	0.10483	0.0952628
sp|Q9UK10|ZN225_HUMAN	ZNF225	ZN225_HUMAN Zinc finger protein 225	2	5.59102	6.13843	5.25703	5.67564	6.46076	6.1499	6.68272	7.09775	7.24333	6.87652	6.9605	5.77942	6.47226	5.12573	6.60424	5.88475	5.66553	6.59778	6.71494	6.02175	1.16455	1.18523	1.06287	0.21977	0.245164	0.0879707	0.0641408	0.0604085	0.0957741	0.111971
sp|Q9UM54|MYO6_HUMAN	MYO6	MYO6_HUMAN Unconventional myosin-VI	44	5.28366	5.92767	5.7193	6.51409	6.39847	6.97051	6.83982	7.28831	7.10395	6.71872	7.14033	6.82362	5.7239	4.86432	5.51916	5.16417	5.86118	6.87428	6.94665	5.31789	1.17285	1.1852	0.907307	0.230017	0.245127	-0.140338	0.0872399	0.053664	0.0298907	0.0715813
sp|Q6UVJ0|SAS6_HUMAN	SASS6	SAS6_HUMAN Spindle assembly abnormal protein 6 homolog	4	5.47484	5.90071	5.52012	5.94446	6.91778	6.28687	6.20357	6.73615	7.16344	6.62005	7.13412	6.15245	6.22483	5.39326	6.37277	5.95459	5.71003	6.53609	6.76751	5.98636	1.14467	1.1852	1.04839	0.194929	0.245127	0.0681807	0.0432181	0.052881	0.0709274	0.0721051
sp|Q2TAY7|SMU1_HUMAN	SMU1	SMU1_HUMAN WD40 repeat-containing protein SMU1	16	5.05603	5.77589	5.54364	6.0064	6.26509	7.66229	7.06942	6.82264	6.25974	6.7666	6.76503	6.72618	5.76678	4.98587	6.56802	5.96037	5.59549	6.95486	6.62939	5.82026	1.24294	1.18477	1.04017	0.313757	0.244611	0.0568191	0.0726016	0.0832976	0.0372794	0.112134
sp|Q9BZE2|PUS3_HUMAN	PUS3	PUS3_HUMAN tRNA pseudouridine(38/39) synthase	3	5.33224	5.35106	5.88527	5.98388	5.60116	5.88081	7.46482	6.42569	6.30316	6.84773	6.82928	6.73782	7.51503	5.57693	6.55796	5.70715	5.63811	6.34312	6.6795	6.33927	1.12504	1.1847	1.12436	0.16998	0.244527	0.169104	0.0611499	0.12966	0.0382443	0.141415
sp|Q16585|SGCB_HUMAN	SGCB	SGCB_HUMAN Beta-sarcoglycan	1	5.33516	5.22579	4.63479	6.5651	7.21113	5.9238	6.27002	6.84615	6.72868	6.15708	6.66473	6.2161	7.10296	6.57699	5.90345	6.6381	5.44021	6.56278	6.44165	6.55537	1.20635	1.18408	1.20499	0.270644	0.243767	0.269016	0.148997	0.0877383	0.0460519	0.075361
tr|H0Y327|H0Y327_HUMAN	MTHFD1L	H0Y327_HUMAN Monofunctional C1-tetrahydrofolate synthase, mitochondrial (Fragment)	2	4.99583	6.11355	5.61649	6.92711	6.5574	6.80322	6.70048	6.74024	7.07544	6.32567	7.24476	7.35612	5.71323	4.73696	5.58964	5.50387	5.91324	6.70033	7.0005	5.38592	1.13311	1.18387	0.910824	0.180283	0.243507	-0.134756	0.138002	0.0155599	0.0663452	0.0818978
sp|P15559-3|NQO1_HUMAN	NQO1	NQO1_HUMAN Isoform 3 of NAD(P)H dehydrogenase [quinone] 1	25	4.84693	5.94325	5.77045	6.56162	6.2404	6.48659	6.87981	7.34701	6.59611	6.40282	7.34521	7.02919	5.67837	4.97248	6.38601	5.51375	5.78056	6.73845	6.84333	5.63765	1.16571	1.18385	0.975277	0.221207	0.243489	-0.0361153	0.122662	0.0717779	0.0620882	0.103404
sp|Q7L099-3|RUFY3_HUMAN	RUFY3	RUFY3_HUMAN Isoform 3 of Protein RUFY3	2	4.1748	6.05661	6.08147	5.51156	6.36365	6.67246	7.11984	7.15244	7.71897	6.44982	5.66986	5.99002	7.75215	6.15912	5.81637	5.31085	5.45611	6.8271	6.45717	6.25962	1.25128	1.18347	1.14727	0.3234	0.243029	0.198203	0.163812	0.0554702	0.139388	0.168422
sp|Q96F25|ALG14_HUMAN	ALG14	ALG14_HUMAN UDP-N-acetylglucosamine transferase subunit ALG14 homolog	2	5.83483	6.36321	5.23708	5.86479	6.62953	6.62028	6.17886	6.03599	5.94246	6.66837	8.36207	6.58742	6.16404	5.8609	5.97421	5.67595	5.82498	6.36617	6.89008	5.91878	1.09291	1.18285	1.0161	0.128172	0.242268	0.0230461	0.079107	0.0478201	0.150025	0.0345622
sp|Q9H3H1|MOD5_HUMAN	TRIT1	MOD5_HUMAN tRNA dimethylallyltransferase, mitochondrial	9	4.9098	6.02774	5.85621	6.42681	6.11754	6.96387	6.8617	7.05331	6.81867	6.38548	7.43306	6.81814	5.87163	5.02182	6.10946	5.32476	5.80514	6.74911	6.86384	5.58192	1.16261	1.18237	0.961547	0.217365	0.241685	-0.0565701	0.11076	0.0634542	0.0627751	0.0891004
sp|P36915|GNL1_HUMAN	GNL1	GNL1_HUMAN Guanine nucleotide-binding protein-like 1	24	5.18562	6.02114	5.76869	6.50316	6.31102	6.77222	6.76834	7.1416	6.92465	6.72754	7.2725	6.82173	5.69938	5.13233	5.60446	5.34563	5.86965	6.74829	6.93661	5.44545	1.14969	1.18177	0.92773	0.201248	0.240955	-0.108224	0.0934373	0.0503884	0.0343048	0.0471508
sp|P17028|ZNF24_HUMAN	ZNF24	ZNF24_HUMAN Zinc finger protein 24	1	4.9291	5.58507	7.43288	5.00183	5.74627	5.74822	6.45742	5.788	6.66999	7.51579	6.56618	6.36635	5.89061	7.77204	6.51714	6.01311	5.73722	5.93498	6.77958	6.54823	1.03447	1.18168	1.14136	0.0488907	0.240844	0.190752	0.203573	0.0587745	0.074743	0.131295
sp|Q86Y79|PTH_HUMAN	PTRH1	PTH_HUMAN Probable peptidyl-tRNA hydrolase	1	5.10392	5.93192	5.39161	6.7937	6.07182	5.88017	6.50314	6.4383	6.655	7.19201	7.5111	6.06011	6.15141	5.79904	5.84648	6.67027	5.80529	6.22336	6.85455	6.1168	1.07202	1.18074	1.05366	0.100326	0.239695	0.0754096	0.127983	0.0477769	0.0928769	0.0655006
sp|Q6ZS86|GLPK5_HUMAN	GK5	GLPK5_HUMAN Putative glycerol kinase 5	2	5.22576	6.07458	5.65598	6.11652	7.36059	6.36355	6.43491	6.55807	6.29399	6.10826	7.43433	7.40258	5.71254	5.55755	6.01473	5.68605	5.76821	6.67928	6.80979	5.74272	1.15795	1.18057	0.995581	0.211569	0.239487	-0.0063901	0.0723179	0.0690581	0.103824	0.0337058
sp|O00116|ADAS_HUMAN	AGPS	ADAS_HUMAN Alkyldihydroxyacetonephosphate synthase, peroxisomal	28	5.08746	5.84874	5.62242	6.46391	6.57215	6.67413	6.86421	7.24939	6.71044	6.55069	7.07094	6.84059	5.80843	5.03001	6.16468	5.4418	5.75563	6.83997	6.79317	5.61123	1.1884	1.18026	0.974911	0.249016	0.239109	-0.0366574	0.0990246	0.0436516	0.0323683	0.0868031
sp|O43395|PRPF3_HUMAN	PRPF3	PRPF3_HUMAN U4/U6 small nuclear ribonucleoprotein Prp3	12	5.37243	5.66141	5.83063	6.32436	6.35302	7.31465	7.14249	7.16985	6.8173	6.62732	7.1725	6.73073	5.65868	4.93638	5.68459	5.20365	5.79721	6.995	6.83696	5.37082	1.20662	1.17935	0.92645	0.270966	0.237997	-0.110214	0.0688465	0.0621306	0.0346337	0.0678171
sp|Q13445|TMED1_HUMAN	TMED1	TMED1_HUMAN Transmembrane emp24 domain-containing protein 1	3	5.25906	5.21514	5.37789	6.15227	6.26207	6.7008	6.89794	7.0835	6.48173	5.59988	7.05483	6.80016	5.98944	6.23994	7.00611	5.87924	5.50109	6.73608	6.48415	6.27868	1.2245	1.1787	1.14135	0.292191	0.2372	0.190744	0.0798987	0.0523344	0.0978421	0.0808917
sp|P00519-2|ABL1_HUMAN	ABL1	ABL1_HUMAN Isoform IB of Tyrosine-protein kinase ABL1	1	5.484	5.64194	5.83696	6.3659	6.63599	6.27905	6.695	6.81441	6.68858	5.91866	7.77374	7.10356	5.78696	6.3356	5.54497	5.09466	5.8322	6.60611	6.87114	5.69055	1.1327	1.17814	0.975712	0.179761	0.236508	-0.0354727	0.0658363	0.0348657	0.113021	0.0908409
sp|Q9Y255|PRLD1_HUMAN	PRELID1	PRLD1_HUMAN PRELI domain-containing protein 1, mitochondrial	1	5.18967	6.06037	5.48506	6.96822	6.32401	6.73068	5.98249	6.26611	6.73008	6.51083	7.1898	7.49035	6.25421	5.08708	5.99723	5.73381	5.92583	6.32582	6.98026	5.76808	1.0675	1.17794	0.97338	0.0942358	0.236265	-0.0389254	0.132192	0.0487546	0.0633733	0.0869014
tr|M0QZL9|M0QZL9_HUMAN	LSR	M0QZL9_HUMAN Lipolysis-stimulated lipoprotein receptor (Fragment)	1	7.12937	5.18278	5.40945	5.96219	7.12537	4.68234	7.96511	5.35152	8.05194	5.78861	7.70977	6.33545	5.32681	7.13633	5.34673	5.49625	5.92095	6.28109	6.97144	5.82653	1.06082	1.17742	0.984054	0.0851857	0.235629	-0.0231911	0.146865	0.242652	0.155293	0.150427
sp|Q5T6F0|DCA12_HUMAN	DCAF12	DCA12_HUMAN DDB1- and CUL4-associated factor 12	2	4.81819	6.12405	6.11268	5.97881	6.10674	6.52434	6.36873	5.84058	7.19379	6.51854	6.69686	6.7099	6.3203	6.40992	5.94404	6.33253	5.75843	6.2101	6.77977	6.2517	1.07844	1.17736	1.08566	0.10894	0.235561	0.118572	0.109455	0.0484102	0.0426987	0.0334162
sp|P78395|PRAME_HUMAN	PRAME	PRAME_HUMAN Melanoma antigen preferentially expressed in tumors	2	5.51879	6.20765	5.41147	5.7375	6.61796	6.86456	6.93826	7.24417	6.82803	7.03816	7.1401	5.91322	5.67355	5.70701	6.02804	5.13154	5.71885	6.91624	6.72988	5.63504	1.20938	1.17679	0.985344	0.274262	0.234855	-0.0213011	0.0617218	0.037301	0.0831705	0.0659736
sp|Q9H7Z7|PGES2_HUMAN	PTGES2	PGES2_HUMAN Prostaglandin E synthase 2	29	4.84794	5.93335	5.85802	6.36678	6.30257	6.63419	6.98001	7.2315	6.59091	6.30862	7.04969	7.10848	5.79178	4.7405	6.579	5.67664	5.75152	6.78707	6.76443	5.69698	1.18005	1.17611	0.990517	0.238844	0.234023	-0.0137466	0.111754	0.0597197	0.0564618	0.132221
sp|Q14156|EFR3A_HUMAN	EFR3A	EFR3A_HUMAN Protein EFR3 homolog A	2	5.22632	6.45501	6.47414	4.51013	6.28051	6.98692	6.53138	6.9916	7.1461	6.4317	7.21616	5.85386	6.43286	6.27751	5.33527	5.85053	5.6664	6.6976	6.66195	5.97404	1.18199	1.17569	1.05429	0.241212	0.233513	0.0762751	0.170646	0.0525578	0.096799	0.0823393
sp|Q92830|KAT2A_HUMAN	KAT2A	KAT2A_HUMAN Histone acetyltransferase KAT2A	3	5.45402	5.69301	6.38942	6.79343	6.01754	6.03816	6.50982	6.90255	7.20804	6.28417	7.60827	7.4908	5.37879	5.43001	5.48703	5.31495	6.08247	6.36702	7.14782	5.4027	1.04678	1.17515	0.88824	0.0659604	0.232846	-0.170978	0.101627	0.0664783	0.0839093	0.0135717
tr|F5GY77|F5GY77_HUMAN	NUP107	F5GY77_HUMAN Nuclear pore complex protein Nup107 (Fragment)	1	5.26	5.89421	4.3166	7.72731	5.36535	6.48961	5.9601	7.08673	7.56304	5.77705	7.22603	6.68491	6.10754	7.81543	5.83275	4.89334	5.79953	6.22545	6.81276	6.16226	1.07344	1.17471	1.06255	0.102242	0.232303	0.0875247	0.24819	0.118104	0.114414	0.197746
sp|Q96RF0|SNX18_HUMAN	SNX18	SNX18_HUMAN Sorting nexin-18	3	5.14607	5.71683	5.67458	6.30778	6.24209	6.67923	6.44081	6.65963	6.85415	6.45199	7.12425	6.40136	6.28092	5.91316	6.27125	5.83589	5.71131	6.50544	6.70794	6.07531	1.13904	1.1745	1.06373	0.187824	0.232046	0.0891339	0.0831546	0.0316906	0.0512236	0.0385183
sp|O43896|KIF1C_HUMAN	KIF1C	KIF1C_HUMAN Kinesin-like protein KIF1C	14	5.37099	5.92131	5.82472	6.20227	6.58968	7.06296	6.90493	6.95124	6.98155	6.90387	6.6441	6.85039	5.97512	5.07298	5.68305	5.06084	5.82982	6.8772	6.84498	5.448	1.17966	1.17413	0.934505	0.23837	0.231594	-0.0977259	0.0592253	0.0294937	0.0210869	0.083689
sp|Q99574|NEUS_HUMAN	SERPINI1	NEUS_HUMAN Neuroserpin	1	5.23992	6.30011	5.72736	6.02068	6.32199	6.70287	5.32083	5.88127	6.77923	7.34464	6.43471	6.7739	6.09258	5.97385	6.06243	7.02366	5.82202	6.05674	6.83312	6.28813	1.04032	1.17367	1.08006	0.0570223	0.231025	0.111112	0.0778213	0.0981507	0.0551988	0.0783914
sp|Q8N5D0|WDTC1_HUMAN	WDTC1	WDTC1_HUMAN WD and tetratricopeptide repeats protein 1	5	5.02632	5.82067	6.05194	6.29548	6.3347	7.55066	6.55177	6.28029	6.25139	6.87083	6.96938	7.12763	5.83251	5.02109	6.39449	5.62084	5.7986	6.67936	6.80481	5.71723	1.15189	1.17353	0.985967	0.204004	0.230849	-0.0203883	0.0948752	0.0887197	0.0564026	0.0992461
sp|Q8IXV7|KLD8B_HUMAN	KLHDC8B	KLD8B_HUMAN Kelch domain-containing protein 8B	1	5.69773	5.34468	5.11773	7.02025	6.53934	7.39428	6.09034	5.21257	6.17472	6.33075	7.95765	6.73672	7.01114	5.51171	4.90141	6.95898	5.7951	6.30913	6.79996	6.09581	1.0887	1.1734	1.05189	0.122609	0.230693	0.072985	0.146834	0.144135	0.118725	0.17337
sp|Q86WK9|MPRA_HUMAN	PAQR7	MPRA_HUMAN Membrane progestin receptor alpha	1	5.32463	4.70974	6.15957	6.36884	6.83072	6.96258	6.77131	6.17386	7.10952	6.20438	6.26129	6.89894	5.83706	6.24557	6.33426	5.80773	5.64069	6.68462	6.61853	6.05615	1.18507	1.17335	1.07365	0.244972	0.230638	0.102529	0.13602	0.0523232	0.0686226	0.0450126
sp|P83110|HTRA3_HUMAN	HTRA3	HTRA3_HUMAN Serine protease HTRA3	1	5.02536	5.96981	6.49663	6.17527	6.27664	6.62514	7.47217	7.6264	6.87082	6.57786	7.76255	6.55393	5.46253	4.74601	5.02722	5.33165	5.91677	7.00009	6.94129	5.14185	1.18309	1.17316	0.869031	0.242564	0.230395	-0.202521	0.106914	0.0932796	0.081562	0.062385
sp|Q8WV74|NUDT8_HUMAN	NUDT8	NUDT8_HUMAN Nucleoside diphosphate-linked moiety X motif 8, mitochondrial	2	4.61922	5.93882	5.86746	6.34827	6.34292	7.1246	6.36823	6.89167	5.74689	6.05777	7.53718	7.3437	5.73381	5.32874	6.59401	6.15673	5.69344	6.68186	6.67138	5.95332	1.17361	1.17177	1.04565	0.230947	0.228685	0.0643938	0.131173	0.0581738	0.134983	0.0914977
sp|Q9H4L5-2|OSBL3_HUMAN	OSBPL3	OSBL3_HUMAN Isoform 1b of Oxysterol-binding protein-related protein 3	26	5.02737	5.83954	5.96967	6.3488	6.25351	6.69709	7.13746	7.13413	6.7924	6.46691	6.94834	6.95837	5.85477	4.84138	5.9712	5.75907	5.79635	6.80555	6.79151	5.60661	1.17411	1.17169	0.967266	0.231568	0.228588	-0.048016	0.0959757	0.0620308	0.0337701	0.0922968
sp|P40425|PBX2_HUMAN	PBX2	PBX2_HUMAN Pre-B-cell leukemia transcription factor 2	7	4.95354	5.83524	6.03117	5.80129	6.13383	7.2433	6.38373	6.68249	6.54447	6.58271	6.77833	6.59674	6.41939	5.32162	6.44408	6.24808	5.65531	6.61084	6.62556	6.10829	1.16896	1.17156	1.0801	0.225227	0.228437	0.111163	0.0846446	0.0722425	0.0157289	0.0870361
sp|Q6T4R5|NHS_HUMAN	NHS	NHS_HUMAN Nance-Horan syndrome protein	1	6.04783	6.58317	5.80517	5.01169	6.53438	6.33834	5.90703	6.12428	6.67177	6.70449	7.26947	6.8212	5.14932	7.90966	5.40841	5.71379	5.86196	6.22601	6.86673	6.0453	1.0621	1.1714	1.03127	0.086923	0.228239	0.0444284	0.111468	0.0434761	0.0402004	0.209111
sp|Q9H825|METL8_HUMAN	METTL8	METL8_HUMAN Methyltransferase-like protein 8	3	5.24125	6.10255	6.14777	6.28615	6.26602	6.51731	6.83935	7.45316	6.98679	6.49381	7.03476	7.33354	5.59277	4.8529	5.55315	5.29872	5.94443	6.76896	6.96223	5.32438	1.13871	1.17122	0.895693	0.187396	0.22801	-0.158924	0.0799486	0.0757801	0.049973	0.0639051
sp|P16885|PLCG2_HUMAN	PLCG2	PLCG2_HUMAN 1-phosphatidylinositol 4,5-bisphosphate phosphodiesterase gamma-2	26	4.971	5.45076	6.06215	6.65147	6.06683	6.14325	7.01811	7.17627	6.69333	6.23544	7.20003	6.96355	5.82621	4.95806	6.54036	6.04317	5.78384	6.60112	6.77309	5.84195	1.1413	1.17104	1.01005	0.190681	0.227785	0.0144211	0.126339	0.0874533	0.061112	0.113105
tr|A2ABJ5|A2ABJ5_HUMAN	FLOT1	A2ABJ5_HUMAN Flotillin-1 (Fragment)	1	5.27616	6.43616	6.02906	6.51326	5.96976	5.88986	6.53914	6.68312	7.16876	6.40978	7.59823	7.20807	5.63315	5.11131	5.72579	5.80841	6.06366	6.27047	7.09621	5.56967	1.03411	1.17028	0.918532	0.0483847	0.22686	-0.122598	0.0934003	0.0636417	0.0700355	0.0563488
sp|P35270|SPRE_HUMAN	SPR	SPRE_HUMAN Sepiapterin reductase	20	4.8575	5.60927	5.6691	6.46648	6.20887	6.46777	6.63435	7.05201	6.2136	6.18427	7.10428	6.94597	6.26979	5.40281	6.86518	6.04876	5.65059	6.59075	6.61203	6.14663	1.16638	1.17015	1.08779	0.222042	0.226692	0.121396	0.116351	0.0536881	0.0728231	0.0982598
sp|Q9NYA4|MTMR4_HUMAN	MTMR4	MTMR4_HUMAN Myotubularin-related protein 4	1	5.47583	5.60053	5.54635	6.37303	6.09893	6.56621	6.70548	6.44802	6.45548	6.96706	6.48129	7.00416	6.39979	5.75233	6.19257	5.93293	5.74894	6.45466	6.727	6.0694	1.12276	1.17013	1.05574	0.167046	0.226668	0.0782604	0.0729151	0.0401957	0.0444759	0.0469386
sp|Q99714|HCD2_HUMAN	HSD17B10	HCD2_HUMAN 3-hydroxyacyl-CoA dehydrogenase type-2	22	5.24415	5.92653	5.73865	5.66138	6.768	7.94834	7.11677	6.58836	6.24052	7.13466	6.91145	6.12195	5.72308	5.36715	6.12933	5.37967	5.64268	7.10537	6.60215	5.64981	1.25922	1.17004	1.00126	0.332529	0.226555	0.00182182	0.0510524	0.0849051	0.075257	0.0636682
sp|O94952|FBX21_HUMAN	FBXO21	FBX21_HUMAN F-box only protein 21	3	5.19645	6.08787	5.76317	6.30993	6.20636	6.2682	6.99403	6.98217	7.26209	6.82267	6.602	6.64199	5.8505	5.0956	5.91927	5.99773	5.83935	6.61269	6.83219	5.71578	1.13244	1.17002	0.978837	0.179428	0.226539	-0.0308599	0.0828601	0.0656688	0.0442394	0.0730964
sp|Q9P2N6|KANL3_HUMAN	KANSL3	KANL3_HUMAN KAT8 regulatory NSL complex subunit 3	2	5.77499	5.66156	4.61835	6.29066	6.04096	4.70914	5.92952	6.48335	6.88289	6.85782	4.99806	7.40476	7.87258	6.83607	7.29675	6.34254	5.58639	5.79074	6.53588	7.08699	1.03658	1.16997	1.26862	0.051832	0.226466	0.343256	0.125488	0.131192	0.161533	0.092108
sp|Q8IZ40|RCOR2_HUMAN	RCOR2	RCOR2_HUMAN REST corepressor 2	3	5.47967	6.12466	5.82996	6.2102	6.87291	6.31502	6.30926	6.41371	6.59744	6.94099	6.8353	7.27914	6.2454	5.89769	4.65367	5.99498	5.91112	6.47772	6.91322	5.69793	1.09585	1.16953	0.963935	0.132055	0.225925	-0.052993	0.0559195	0.041339	0.0409523	0.124855
tr|B4DEK4|B4DEK4_HUMAN	SNX2	B4DEK4_HUMAN Sorting nexin-2	1	4.96984	6.09918	5.88855	5.61825	6.97223	6.39673	7.12547	6.69089	6.39372	6.74827	6.99636	6.23642	5.96337	5.6487	6.23301	6.01903	5.64395	6.79633	6.59369	5.96603	1.20418	1.16828	1.05707	0.268049	0.22438	0.0800641	0.0869299	0.0473038	0.0520725	0.0404591
sp|P52747|ZN143_HUMAN	ZNF143	ZN143_HUMAN Zinc finger protein 143	1	4.97943	4.79839	7.66124	5.54507	7.08923	5.93135	5.96531	5.70007	6.42784	7.92765	5.81056	6.68111	6.10611	5.55074	6.79262	7.03328	5.74603	6.17149	6.71179	6.37069	1.07404	1.16807	1.10871	0.103053	0.224131	0.148883	0.228995	0.10096	0.132485	0.105663
sp|P11413-2|G6PD_HUMAN	G6PD	G6PD_HUMAN Isoform Long of Glucose-6-phosphate 1-dehydrogenase	44	5.13526	5.98134	5.77513	6.33852	6.41258	6.58105	6.72407	7.22423	6.77176	6.34147	7.21635	6.79712	5.94181	5.02911	6.116	5.6142	5.80756	6.73548	6.78167	5.67528	1.15978	1.16773	0.977222	0.213849	0.223709	-0.0332412	0.0869602	0.0519367	0.0526909	0.0842917
sp|Q96MH6|TMM68_HUMAN	TMEM68	TMM68_HUMAN Transmembrane protein 68	3	5.49862	6.00715	5.68845	6.36238	6.78295	6.50642	7.00742	6.57747	6.88842	6.75159	6.97953	6.88689	5.43013	5.29253	6.06968	5.27036	5.88915	6.71856	6.87661	5.51568	1.14084	1.16767	0.936583	0.190094	0.223638	-0.094522	0.0643364	0.0335577	0.0136591	0.0681762
sp|Q6IBW4-4|CNDH2_HUMAN	NCAPH2	CNDH2_HUMAN Isoform 4 of Condensin-2 complex subunit H2	2	5.69679	5.15854	5.52469	6.54464	7.23881	7.1385	6.2788	7.02865	6.28299	6.36041	7.07208	7.04758	5.79186	5.19066	5.64192	6.00307	5.73117	6.92119	6.69076	5.65688	1.20764	1.16744	0.987038	0.272192	0.223343	-0.0188225	0.10241	0.063107	0.0638861	0.0608661
sp|Q86W34|AMZ2_HUMAN	AMZ2	AMZ2_HUMAN Archaemetzincin-2	2	4.96872	5.57445	5.8114	6.54876	5.90442	6.35494	6.6609	7.6773	6.21976	6.31733	7.13229	7.06266	6.03714	5.66862	6.21815	5.84317	5.72583	6.64939	6.68301	5.94177	1.1613	1.16717	1.03771	0.215737	0.223013	0.0534073	0.114109	0.113156	0.0719853	0.0400415
sp|P50570|DYN2_HUMAN	DNM2	DYN2_HUMAN Dynamin-2	27	5.2626	6.00494	5.67069	6.16938	6.60344	6.78856	6.77371	7.25979	6.72751	6.41867	7.01962	6.8001	5.936	5.02964	6.03645	5.49891	5.7769	6.85637	6.74147	5.62525	1.18686	1.16697	0.973748	0.24715	0.222768	-0.0383789	0.069373	0.0410934	0.0368557	0.0818748
sp|Q9H1P3|OSBL2_HUMAN	OSBPL2	OSBL2_HUMAN Oxysterol-binding protein-related protein 2	13	5.29569	5.67556	6.0408	6.55221	6.3088	6.61138	6.68851	6.95624	6.7005	6.29115	7.19303	7.31359	5.74906	4.89383	6.0372	5.69244	5.89106	6.64123	6.87457	5.59313	1.12734	1.16695	0.949426	0.172923	0.22274	-0.074872	0.0909092	0.0401093	0.068478	0.0876132
sp|Q96L50|LLR1_HUMAN	LRR1	LLR1_HUMAN Leucine-rich repeat protein 1	1	4.96528	5.9088	5.82639	6.44767	6.2723	6.17779	7.08033	6.39492	6.45647	6.46753	7.33397	6.7463	5.63301	5.76421	6.15105	6.37399	5.78703	6.48133	6.75107	5.98057	1.11998	1.16658	1.03344	0.163467	0.222291	0.0474574	0.105963	0.0631203	0.0608922	0.0572309
sp|Q9Y3A0|COQ4_HUMAN	COQ4	COQ4_HUMAN Ubiquinone biosynthesis protein COQ4 homolog, mitochondrial	2	5.83791	5.93305	5.9022	6.42175	6.41306	6.28407	7.37546	5.44373	5.51608	7.6124	7.56816	7.41186	4.78571	5.93065	6.13079	5.43312	6.02373	6.37908	7.02712	5.57007	1.05899	1.16657	0.924688	0.0826919	0.222278	-0.112962	0.0445392	0.124025	0.143875	0.107639
sp|Q8N5C8|TAB3_HUMAN	TAB3	TAB3_HUMAN TGF-beta-activated kinase 1 and MAP3K7-binding protein 3	1	4.91699	5.79399	3.70106	6.48112	6.76875	6.68526	6.37875	8.84824	6.93742	5.27598	6.29238	5.85743	5.19688	7.44005	6.20436	7.22134	5.22329	7.17025	6.0908	6.51566	1.37275	1.16609	1.24742	0.457065	0.221674	0.318952	0.229709	0.157757	0.115154	0.158226
tr|C9JTX5|C9JTX5_HUMAN	ACTB	C9JTX5_HUMAN Actin, cytoplasmic 1 (Fragment)	3	4.9502	5.3256	5.21343	6.10263	7.82764	7.93502	7.31387	4.68718	5.31112	6.72547	6.71912	6.41652	6.37772	6.36804	6.00093	6.72552	5.39797	6.94093	6.29306	6.36805	1.28584	1.16582	1.17971	0.362713	0.221346	0.238437	0.0917799	0.219964	0.106516	0.046465
tr|F8W950|F8W950_HUMAN	AIMP2	F8W950_HUMAN Aminoacyl tRNA synthase complex-interacting multifunctional protein 2	1	5.00423	5.5767	5.63198	6.85651	6.84314	6.30711	6.62002	7.21327	6.53777	6.49056	6.93717	6.9275	5.97998	5.34055	5.9614	5.7721	5.76736	6.74588	6.72325	5.76351	1.16967	1.16574	0.999333	0.226098	0.221249	-0.000962767	0.135173	0.0565301	0.0360288	0.0515663
tr|B1AHD3|B1AHD3_HUMAN	PDXP	B1AHD3_HUMAN Pyridoxal phosphate phosphatase	1	5.34434	5.34905	6.14029	6.73319	4.90544	6.90746	5.67813	7.0669	6.08748	7.59549	6.77552	7.00243	6.94071	6.28662	4.7101	6.47683	5.89172	6.13948	6.86523	6.10356	1.04205	1.16523	1.03596	0.0594288	0.22062	0.0509639	0.114446	0.167843	0.0907728	0.158718
sp|P29350-3|PTN6_HUMAN	PTPN6	PTN6_HUMAN Isoform 2 of Tyrosine-protein phosphatase non-receptor type 6	22	5.10871	5.90408	5.92608	6.45176	6.13012	6.58656	6.82001	7.05426	6.6057	6.61715	7.13552	6.8935	5.78821	5.03556	6.22136	5.72144	5.84766	6.64774	6.81297	5.69164	1.13682	1.16508	0.97332	0.185005	0.220425	-0.0390138	0.0947166	0.0593256	0.037116	0.0861484
sp|Q99543|DNJC2_HUMAN	DNAJC2	DNJC2_HUMAN DnaJ homolog subfamily C member 2	22	5.09822	5.8201	5.91831	6.48017	6.44028	6.81858	6.83706	6.95734	6.71329	6.71649	7.07045	6.66346	5.91077	4.8239	6.25169	5.47989	5.8292	6.76332	6.79092	5.61656	1.16025	1.16498	0.963522	0.214433	0.22031	-0.0536105	0.0973521	0.0331157	0.0276732	0.109607
sp|P62191|PRS4_HUMAN	PSMC1	PRS4_HUMAN 26S protease regulatory subunit 4	47	5.16612	5.94357	5.82799	6.27346	6.54943	6.69825	6.80966	6.86928	6.64802	6.49654	6.82741	7.05108	5.91382	5.16365	6.11247	5.64925	5.80279	6.73165	6.75576	5.7098	1.16007	1.16423	0.983975	0.214216	0.219373	-0.0233059	0.080051	0.0208938	0.0353553	0.071907
sp|P04350|TBB4A_HUMAN	TUBB4A	TBB4A_HUMAN Tubulin beta-4A chain	4	5.20541	6.21178	5.6701	5.91153	6.72286	7.6474	6.66251	6.66223	6.45649	7.34264	6.18131	6.79168	5.64732	5.84912	5.67418	5.36344	5.7497	6.92375	6.69303	5.63352	1.20419	1.16406	0.979792	0.268066	0.219172	-0.0294526	0.0739455	0.0697997	0.0746813	0.0356892
sp|Q9ULD0|OGDHL_HUMAN	OGDHL	OGDHL_HUMAN 2-oxoglutarate dehydrogenase-like, mitochondrial	3	5.21588	5.90362	5.96919	6.39791	5.98675	6.20978	7.38878	6.80816	7.50014	5.9318	7.42824	6.47835	5.32687	5.14404	6.36013	5.95035	5.87165	6.59837	6.83463	5.69535	1.12377	1.16401	0.969974	0.168343	0.219098	-0.0439821	0.0832906	0.095604	0.111343	0.0986325
sp|Q92546|RGP1_HUMAN	RGP1	RGP1_HUMAN Retrograde Golgi transport protein RGP1 homolog	3	4.85227	6.11316	6.22382	6.11038	6.39228	6.75953	6.89515	6.6156	6.58705	6.60292	6.65863	7.27072	6.1973	5.7362	5.95171	5.03328	5.82491	6.66564	6.77983	5.72962	1.14433	1.16394	0.983642	0.194508	0.219014	-0.0237951	0.111688	0.0322602	0.0484815	0.0874391
sp|Q9UKT5|FBX4_HUMAN	FBXO4	FBX4_HUMAN F-box only protein 4	1	5.96341	5.46127	6.50234	6.24438	6.45859	5.51616	6.42516	7.06025	7.51367	6.35096	7.04098	7.21387	5.04803	5.88903	5.52281	5.7891	6.04285	6.36504	7.02987	5.56224	1.05332	1.16334	0.920467	0.0749404	0.218269	-0.119562	0.073778	0.100036	0.0701204	0.0676063
sp|Q9H7H0-3|MET17_HUMAN	METTL17	MET17_HUMAN Isoform 3 of Methyltransferase-like protein 17, mitochondrial	2	4.84633	5.343	6.01817	6.42769	6.41017	6.05823	6.50394	6.84223	6.60433	6.36992	6.55394	6.80291	6.1851	6.15455	6.61427	6.26522	5.6588	6.45364	6.58277	6.30478	1.14046	1.16328	1.11416	0.189618	0.2182	0.155952	0.124129	0.0499519	0.0270418	0.0335515
sp|Q86VY9|T200A_HUMAN	TMEM200A	T200A_HUMAN Transmembrane protein 200A	3	5.7276	6.17401	4.6331	6.56796	6.72424	6.15678	6.52312	6.3679	6.08439	6.86314	6.56146	7.36486	6.09879	5.8142	6.60622	5.73222	5.77567	6.44301	6.71846	6.06286	1.11554	1.16324	1.04972	0.157747	0.218143	0.0700102	0.144658	0.0372795	0.0799453	0.0651237
sp|O60488|ACSL4_HUMAN	ACSL4	ACSL4_HUMAN Long-chain-fatty-acid--CoA ligase 4	29	5.06764	5.9883	5.70643	6.38574	6.50145	6.8789	6.8026	7.27541	6.66979	6.47137	6.95788	6.82422	5.68437	4.94249	6.1259	5.71751	5.78703	6.86459	6.73081	5.61757	1.1862	1.16309	0.970717	0.246351	0.217959	-0.0428769	0.0958474	0.0464253	0.0310839	0.0877264
sp|Q8WVK7|SKA2_HUMAN	SKA2	SKA2_HUMAN Spindle and kinetochore-associated protein 2	4	4.86955	6.0963	5.88965	6.49286	5.99815	6.7386	6.63767	6.47455	6.59312	7.03113	6.86964	6.66132	5.86042	5.52327	6.44984	5.81393	5.83709	6.46224	6.7888	5.91187	1.1071	1.16305	1.01281	0.146786	0.217908	0.018364	0.118533	0.0507508	0.0294358	0.0657055
sp|Q9NYT0|PLEK2_HUMAN	PLEK2	PLEK2_HUMAN Pleckstrin-2	8	5.00238	6.17829	5.84452	6.49614	6.3602	6.85527	6.43201	6.84113	6.89595	6.40389	6.88476	7.16799	5.64119	5.55426	5.89751	5.54451	5.88033	6.62215	6.83815	5.65937	1.12615	1.16288	0.962423	0.171403	0.217708	-0.0552569	0.109336	0.0396732	0.0464668	0.029085
sp|Q8WZ82|OVCA2_HUMAN	OVCA2	OVCA2_HUMAN Ovarian cancer-associated gene 2 protein	6	4.96891	5.39478	6.13272	6.42353	6.19649	6.94004	6.96972	7.16003	5.95902	6.63673	7.27205	6.78467	5.71548	5.40527	6.13799	5.90256	5.72999	6.81657	6.66312	5.79033	1.18963	1.16285	1.01053	0.250515	0.217666	0.015113	0.116411	0.0623071	0.0813771	0.0534481
sp|Q9H0M0|WWP1_HUMAN	WWP1	WWP1_HUMAN NEDD4-like E3 ubiquitin-protein ligase WWP1	4	5.32497	5.66744	5.52081	6.26718	6.11376	7.01887	6.70443	6.61396	6.58307	6.3694	6.6672	6.86641	6.19804	5.29473	6.67949	6.11023	5.6951	6.61275	6.62152	6.07062	1.16113	1.16267	1.06594	0.21553	0.217441	0.0921233	0.0713546	0.0567392	0.0310853	0.0946543
sp|Q96BT7-4|ALKB8_HUMAN	ALKBH8	ALKB8_HUMAN Isoform 4 of Alkylated DNA repair protein alkB homolog 8	5	5.11728	5.88738	6.0989	6.22165	6.01473	6.61816	6.78837	6.37891	6.76728	6.7279	6.7325	6.88477	6.04874	5.94433	6.08448	5.68462	5.8313	6.45004	6.77811	5.94054	1.10611	1.16237	1.01873	0.145491	0.217065	0.0267765	0.084995	0.0519847	0.0108063	0.0304147
sp|P04637|P53_HUMAN	TP53	P53_HUMAN Cellular tumor antigen p53	1	5.78567	5.75709	5.72677	5.99479	5.70444	6.65924	7.09983	6.9782	7.58588	6.45406	6.15859	6.83377	5.94153	5.04969	6.2145	6.05595	5.81608	6.61043	6.75808	5.81542	1.13658	1.16196	0.999886	0.184696	0.216565	-0.000164344	0.0208978	0.0955944	0.0913274	0.0898664
sp|P49591|SYSC_HUMAN	SARS	SYSC_HUMAN Serine--tRNA ligase, cytoplasmic	35	5.21904	5.96335	5.75917	6.26052	6.45419	6.81629	6.76897	6.99726	6.72143	6.47424	6.9708	6.7838	5.88827	5.05429	6.22297	5.64543	5.80052	6.75918	6.73757	5.70274	1.16527	1.16155	0.983143	0.220665	0.216046	-0.024527	0.0756684	0.0334175	0.0304338	0.086431
sp|Q9BQ69|MACD1_HUMAN	MACROD1	MACD1_HUMAN O-acetyl-ADP-ribose deacetylase MACROD1	6	5.10102	5.85116	5.82679	6.38577	6.65053	6.55389	7.00079	7.31668	6.82418	6.37415	7.234	6.47375	5.90103	4.96185	6.17296	5.37144	5.79119	6.88047	6.72652	5.60182	1.18809	1.16151	0.967301	0.248649	0.216002	-0.047963	0.0910843	0.0506455	0.0579051	0.0965934
sp|P54855|UDB15_HUMAN	UGT2B15	UDB15_HUMAN UDP-glucuronosyltransferase 2B15	1	5.80295	5.69945	7.09712	4.75538	5.5149	5.38806	6.05566	6.81723	7.59259	7.45539	5.90379	6.16932	6.64604	6.37462	5.9616	6.7659	5.83872	5.94396	6.78027	6.43704	1.01802	1.16126	1.10247	0.0257717	0.21569	0.140744	0.164808	0.109385	0.127929	0.0554184
sp|Q96BJ8-3|ELMO3_HUMAN	ELMO3	ELMO3_HUMAN Isoform 3 of Engulfment and cell motility protein 3	10	5.2733	5.96585	5.78758	6.50328	6.67833	7.07067	6.67046	6.57903	6.5286	6.81828	6.99473	6.98168	5.64172	5.02886	5.96691	5.51073	5.8825	6.74962	6.83082	5.53705	1.14741	1.16121	0.941275	0.198377	0.215629	-0.0873112	0.0862606	0.0324056	0.0317512	0.0703098
sp|P14324|FPPS_HUMAN	FDPS	FPPS_HUMAN Farnesyl pyrophosphate synthase	13	5.02705	5.62122	6.23594	6.37773	6.19146	6.30703	6.99537	7.23841	6.71399	6.32368	7.23606	6.7237	5.78754	4.97757	6.38008	5.8632	5.81548	6.68307	6.74936	5.7521	1.14918	1.16058	0.9891	0.200611	0.214851	-0.0158114	0.106569	0.0767375	0.0554366	0.100766
sp|Q9BRR3|TM246_HUMAN	TMEM246	TM246_HUMAN Transmembrane protein 246	1	6.35213	5.02582	5.28359	6.9821	6.07073	6.22096	7.30391	7.51191	7.19434	7.23738	6.89024	6.11815	5.38403	4.10191	6.05434	6.26847	5.91091	6.77688	6.86003	5.45219	1.1465	1.16057	0.922394	0.19724	0.214834	-0.116545	0.155025	0.108626	0.0755325	0.178982
sp|Q07002-3|CDK18_HUMAN	CDK18	CDK18_HUMAN Isoform 3 of Cyclin-dependent kinase 18	3	4.90341	6.19063	6.01759	6.5898	6.01435	6.33088	6.89398	6.77098	7.56769	6.47218	6.98258	6.48357	5.67437	5.35391	5.98489	5.76919	5.92536	6.50255	6.8765	5.69559	1.09741	1.16052	0.961223	0.134103	0.214773	-0.0570569	0.121884	0.062347	0.0754175	0.0460424
sp|Q92871|PMM1_HUMAN	PMM1	PMM1_HUMAN Phosphomannomutase 1	6	5.57059	6.12369	5.81641	6.17357	6.25336	6.16485	6.11188	6.46777	6.37966	6.93591	6.77689	7.39321	6.13685	5.72815	6.04322	5.92399	5.92107	6.24947	6.87142	5.95805	1.05546	1.1605	1.00625	0.077876	0.214751	0.00898414	0.0476295	0.0250906	0.0610064	0.029589
sp|O75928|PIAS2_HUMAN	PIAS2	PIAS2_HUMAN E3 SUMO-protein ligase PIAS2	4	4.79881	5.77381	5.64342	6.56014	6.1508	6.23563	6.378	6.65104	6.34975	6.48808	6.5768	7.01009	7.72116	5.60242	6.12491	5.93514	5.69405	6.35387	6.60618	6.34591	1.11588	1.16019	1.11448	0.158181	0.214362	0.156373	0.126663	0.0344944	0.0431446	0.14843
sp|Q659A1|NARG2_HUMAN	NARG2	NARG2_HUMAN NMDA receptor-regulated protein 2	1	5.19377	6.1697	5.37227	6.08283	7.47643	6.89749	7.22458	7.0415	5.74873	7.25286	6.23184	7.23784	5.5266	5.3225	5.53423	5.68682	5.70464	7.16	6.61782	5.51754	1.25512	1.16008	0.967201	0.327823	0.214219	-0.0481119	0.0865168	0.0348931	0.113481	0.0270967
sp|Q15126|PMVK_HUMAN	PMVK	PMVK_HUMAN Phosphomevalonate kinase	13	4.8455	5.78361	6.03615	6.86445	6.19795	6.4438	6.93407	7.35393	6.44969	6.23065	7.27301	7.34144	5.68381	4.64773	6.29201	5.62221	5.88243	6.73244	6.8237	5.56144	1.1445	1.16001	0.945433	0.194717	0.214142	-0.0809532	0.141313	0.076506	0.082966	0.122273
sp|Q9NRC1|ST7_HUMAN	ST7	ST7_HUMAN Suppressor of tumorigenicity 7 protein	1	5.85594	6.14471	5.71065	6.17294	6.66467	6.16694	6.24872	6.71784	6.64246	6.75287	6.66122	7.64858	5.72077	5.67565	5.958	5.25805	5.97106	6.44954	6.92628	5.65312	1.08013	1.15998	0.946753	0.11121	0.214094	-0.0789404	0.0376943	0.0437135	0.0698703	0.0514834
sp|Q9UQ16-4|DYN3_HUMAN	DNM3	DYN3_HUMAN Isoform 4 of Dynamin-3	16	5.37805	5.93793	5.59341	6.09242	6.69223	6.89279	6.80803	7.29221	6.82616	6.43163	6.99837	6.4246	5.8959	5.07488	6.18059	5.4808	5.75045	6.92131	6.67019	5.65804	1.20361	1.15994	0.98393	0.267371	0.214052	-0.0233725	0.0563888	0.0376475	0.0432138	0.0854419
sp|Q8IY22|CMIP_HUMAN	CMIP	CMIP_HUMAN C-Maf-inducing protein	4	5.52707	5.52738	6.0806	6.56391	5.93688	6.74757	6.65644	7.15606	6.63468	7.16206	6.66405	7.01439	5.57453	5.55047	5.47612	5.72781	5.92474	6.62424	6.86879	5.58223	1.11806	1.15934	0.94219	0.161003	0.213305	-0.0859096	0.0843281	0.0765568	0.0379579	0.018936
sp|Q9UNH7|SNX6_HUMAN	SNX6	SNX6_HUMAN Sorting nexin-6	23	5.02921	5.85508	5.7808	6.37198	6.37016	6.50215	7.13021	7.25727	6.66149	6.33588	7.03998	6.66893	5.87827	4.88686	6.45511	5.77663	5.75927	6.81495	6.67657	5.74922	1.1833	1.15927	0.998255	0.242817	0.213222	-0.00251972	0.0960515	0.0651129	0.0431004	0.112695
sp|Q9ULM6|CNOT6_HUMAN	CNOT6	CNOT6_HUMAN CCR4-NOT transcription complex subunit 6	6	5.57112	5.97308	5.81736	6.37016	6.52484	6.93871	7.14275	6.68985	7.20697	6.56914	7.19807	6.53363	5.41901	5.36367	5.41339	5.26826	5.93293	6.82404	6.87695	5.36608	1.1502	1.15912	0.904457	0.201881	0.213025	-0.144876	0.0564955	0.0398861	0.0547088	0.0130069
tr|A6PVN8|A6PVN8_HUMAN	PPP2R4	A6PVN8_HUMAN Serine/threonine-protein phosphatase 2A activator (Fragment)	1	4.98779	6.19973	5.34989	6.64295	4.99851	6.71418	6.98024	6.71318	7.32675	5.59063	6.70697	7.24302	5.74391	5.56028	6.18287	7.05908	5.79509	6.35153	6.71684	6.13654	1.09602	1.15906	1.05892	0.132273	0.212952	0.0825932	0.131136	0.143386	0.11902	0.108888
sp|Q14344|GNA13_HUMAN	GNA13	GNA13_HUMAN Guanine nucleotide-binding protein subunit alpha-13	16	5.10002	5.7007	6.0795	6.45022	6.37982	6.54593	6.91595	7.14656	6.91259	6.33362	7.09903	6.69508	5.89421	4.9727	6.20564	5.56842	5.83261	6.74707	6.76008	5.66024	1.15678	1.15901	0.970448	0.210118	0.212899	-0.0432777	0.0988125	0.0515873	0.0486318	0.0931144
sp|Q5BJD5|TM41B_HUMAN	TMEM41B	TM41B_HUMAN Transmembrane protein 41B	1	5.147	6.04425	6.77774	5.65031	6.48364	6.93645	5.95102	7.13205	7.57714	6.69333	6.30623	6.7974	5.78449	5.96692	4.955	5.79704	5.90482	6.62579	6.84352	5.62586	1.1221	1.15897	0.952757	0.166198	0.212845	-0.06982	0.116534	0.0793055	0.0778517	0.0808613
sp|Q5SW96|ARH_HUMAN	LDLRAP1	ARH_HUMAN Low density lipoprotein receptor adapter protein 1	2	5.15594	5.52654	6.26443	5.83057	7.28084	6.23491	6.99723	6.42084	6.50017	6.46026	6.93804	6.48922	5.77681	5.56573	6.31813	6.24032	5.69437	6.73345	6.59692	5.97525	1.18248	1.1585	1.04933	0.241811	0.212257	0.0694622	0.0824687	0.0725272	0.0345667	0.0607204
sp|Q8NBI5|S43A3_HUMAN	SLC43A3	S43A3_HUMAN Solute carrier family 43 member 3	1	5.01485	5.37983	5.99194	5.1493	11.2693	5.95431	6.08535	6.37839	6.74796	6.21463	5.37126	6.61009	5.75435	7.08606	5.58912	5.40329	5.38398	7.42184	6.23598	5.9582	1.3785	1.15825	1.10665	0.463103	0.211944	0.146205	0.0803163	0.346423	0.0992969	0.128471
sp|O43776|SYNC_HUMAN	NARS	SYNC_HUMAN Asparagine--tRNA ligase, cytoplasmic	50	4.88384	5.81786	6.1266	6.65047	6.09567	6.30967	6.81344	7.24743	6.72582	6.40485	7.10178	6.95735	5.81268	4.87706	6.39967	5.77579	5.86969	6.61655	6.79745	5.7163	1.12724	1.15806	0.973867	0.172795	0.211709	-0.0382033	0.126355	0.0781568	0.044739	0.109907
sp|Q96RQ1|ERGI2_HUMAN	ERGIC2	ERGI2_HUMAN Endoplasmic reticulum-Golgi intermediate compartment protein 2	3	5.15045	5.83753	5.57892	6.70257	6.83019	7.30544	7.11611	6.44154	6.70776	6.76507	6.72811	6.74426	5.62683	5.23395	5.82731	5.40395	5.81737	6.92332	6.7363	5.52301	1.19011	1.15796	0.9494	0.251098	0.21159	-0.0749117	0.11253	0.054299	0.00360856	0.046879
sp|O75182|SIN3B_HUMAN	SIN3B	SIN3B_HUMAN Paired amphipathic helix protein Sin3b	3	5.56943	5.44406	6.20047	7.3032	6.50908	6.24065	5.56644	6.42656	7.10148	6.49516	7.84591	6.94424	5.29605	5.85186	5.64893	5.55645	6.12929	6.18568	7.0967	5.58832	1.0092	1.15783	0.911741	0.0132128	0.211428	-0.133305	0.138634	0.069163	0.0791458	0.0412692
sp|Q9NWS6|F118A_HUMAN	FAM118A	F118A_HUMAN Protein FAM118A	6	5.38697	5.12897	6.36925	6.12473	6.03373	6.32504	6.78512	6.53121	6.25509	6.63174	6.88159	6.86884	5.96011	6.17934	6.63003	5.90823	5.75248	6.41878	6.65931	6.16943	1.11583	1.15764	1.07248	0.158114	0.21119	0.100953	0.102419	0.0495849	0.0439915	0.053292
sp|Q05469|LIPS_HUMAN	LIPE	LIPS_HUMAN Hormone-sensitive lipase	1	5.66819	6.25881	5.65076	6.40341	5.99768	6.90824	6.2572	6.91604	6.66903	6.96717	7.45256	6.66355	5.71587	5.38032	5.33493	5.75623	5.99529	6.51979	6.93808	5.54684	1.08748	1.15725	0.925199	0.120995	0.210706	-0.112165	0.0654348	0.0713644	0.0534968	0.0396418
sp|Q96RP9|EFGM_HUMAN	GFM1	EFGM_HUMAN Elongation factor G, mitochondrial	29	4.87483	5.82606	5.98066	6.31039	6.30876	6.34562	6.80559	7.12862	6.4451	6.3123	7.04	6.808	5.88268	5.23822	6.73295	5.96023	5.74798	6.64715	6.65135	5.95352	1.15643	1.15716	1.03576	0.209679	0.210591	0.0506866	0.107195	0.0590591	0.0500962	0.102824
sp|Q9Y3B1|SLMO2_HUMAN	SLMO2	SLMO2_HUMAN Protein slowmo homolog 2	2	6.10063	5.75068	5.19134	5.41801	5.0664	6.65869	7.42283	5.4074	6.61059	6.71836	6.85027	5.80219	6.7985	7.34455	6.69224	6.16731	5.61517	6.13883	6.49535	6.75065	1.09326	1.15675	1.20222	0.128635	0.210079	0.265698	0.0706798	0.178545	0.0727272	0.0714892
sp|Q99504|EYA3_HUMAN	EYA3	EYA3_HUMAN Eyes absent homolog 3	5	5.10969	5.77403	6.15172	6.37767	6.29264	6.41455	6.86536	7.26796	6.27871	6.77009	6.95774	7.07489	5.71247	5.34184	5.81977	5.79089	5.85328	6.71013	6.77036	5.66624	1.14639	1.15668	0.968046	0.197096	0.209987	-0.0468523	0.0947767	0.0664772	0.0518413	0.0389974
sp|Q9BVK8|TM147_HUMAN	TMEM147	TM147_HUMAN Transmembrane protein 147	1	5.62263	6.74111	6.09009	6.68455	5.94512	6.22553	6.09754	7.16046	7.83006	7.66181	7.30913	6.27291	5.26656	4.74411	5.05088	5.29752	6.28459	6.35716	7.26848	5.08977	1.01155	1.15655	0.80988	0.0165632	0.209833	-0.30422	0.0844182	0.0861486	0.0960732	0.0501433
sp|Q8IZ81|ELMD2_HUMAN	ELMOD2	ELMD2_HUMAN ELMO domain-containing protein 2	10	5.10858	5.76732	5.88026	6.47925	6.2767	6.28418	6.94536	7.44089	6.48275	6.15738	7.13554	7.08515	5.95398	4.76743	6.35914	5.87609	5.80885	6.73678	6.7152	5.73916	1.15974	1.15603	0.988002	0.213807	0.209178	-0.0174136	0.0967033	0.0837857	0.0708326	0.118754
sp|Q8TDJ6-3|DMXL2_HUMAN	DMXL2	DMXL2_HUMAN Isoform 3 of DmX-like protein 2	1	5.78542	5.37587	5.07443	7.07249	6.66905	6.67361	6.77002	6.97783	6.82744	6.8135	6.14142	7.1617	5.52054	4.75347	6.69429	5.68891	5.82705	6.77263	6.73602	5.6643	1.16227	1.15599	0.97207	0.216949	0.209129	-0.040868	0.151009	0.0213371	0.0635137	0.140932
sp|O15160|RPAC1_HUMAN	POLR1C	RPAC1_HUMAN DNA-directed RNA polymerases I and III subunit RPAC1	16	5.11259	5.90966	5.84072	6.52969	6.28366	6.50997	6.60523	7.09867	6.74307	6.56327	6.80856	6.91603	5.88188	5.30218	6.02063	5.87422	5.84816	6.62438	6.75773	5.76973	1.13273	1.15553	0.986588	0.179802	0.208555	-0.0194808	0.0991854	0.051892	0.0218942	0.0552674
sp|Q13554|KCC2B_HUMAN	CAMK2B	KCC2B_HUMAN Calcium/calmodulin-dependent protein kinase type II subunit beta	6	5.07172	5.61952	5.7252	6.41171	6.23185	5.99288	6.49439	6.4477	6.30655	6.426	6.90385	6.73893	6.1741	6.09346	6.48587	6.87625	5.70704	6.29171	6.59383	6.40742	1.10245	1.15539	1.12272	0.140709	0.208375	0.167002	0.0964084	0.0365094	0.0417964	0.0554697
sp|O15397|IPO8_HUMAN	IPO8	IPO8_HUMAN Importin-8	5	5.91026	6.0159	5.85231	6.20231	6.34255	6.7956	6.71459	6.22883	6.98077	6.89988	6.80194	7.01868	6.00372	5.11931	5.71225	5.4011	5.99519	6.52039	6.92532	5.5591	1.0876	1.15514	0.927258	0.121152	0.208074	-0.108957	0.0256524	0.042473	0.0138653	0.0688534
sp|Q9NSE4|SYIM_HUMAN	IARS2	SYIM_HUMAN Isoleucine--tRNA ligase, mitochondrial	49	5.1787	6.07872	5.63711	6.19491	6.39854	6.64499	6.72371	7.02479	6.64251	6.44159	6.95659	6.63061	6.02686	5.19637	6.40684	5.81716	5.77236	6.69801	6.66782	5.86181	1.16036	1.15513	1.0155	0.214571	0.208055	0.0221843	0.0802112	0.0385427	0.0320015	0.0863774
sp|Q8WXI4|ACO11_HUMAN	ACOT11	ACO11_HUMAN Acyl-coenzyme A thioesterase 11	10	5.08761	5.68103	5.84823	6.78842	6.26659	6.61827	6.87021	7.0506	6.49466	6.541	7.0063	6.98383	5.76089	5.20967	6.06519	5.72751	5.85132	6.70142	6.75645	5.69081	1.14528	1.15469	0.972569	0.195704	0.207502	-0.0401275	0.120459	0.0507068	0.0408991	0.062368
sp|Q9Y3A6|TMED5_HUMAN	TMED5	TMED5_HUMAN Transmembrane emp24 domain-containing protein 5	6	4.82881	5.46636	6.25797	6.31154	6.2415	6.20894	6.70356	6.67494	6.28674	6.11989	7.16056	6.83266	6.31099	5.38932	6.83343	6.3728	5.71617	6.45723	6.59996	6.22663	1.12964	1.15461	1.0893	0.175868	0.207409	0.123404	0.123613	0.04158	0.073032	0.09715
sp|Q15645|PCH2_HUMAN	TRIP13	PCH2_HUMAN Pachytene checkpoint protein 2 homolog	22	5.38239	6.09949	5.71106	6.24659	6.51109	7.0848	7.04324	6.78294	6.80142	6.70019	6.84458	6.71291	5.77903	5.12552	5.73117	5.44358	5.85988	6.85552	6.76478	5.51982	1.16991	1.15442	0.941969	0.226394	0.20717	-0.0862492	0.0666127	0.0387496	0.0103029	0.054665
sp|Q8WYQ9-2|ZCH14_HUMAN	ZCCHC14	ZCH14_HUMAN Isoform 2 of Zinc finger CCHC domain-containing protein 14	2	5.41536	6.0008	6.09656	5.58106	6.71173	6.79349	6.25657	6.21685	6.71128	5.8785	6.84446	7.21962	6.08744	5.46383	6.05946	6.663	5.77345	6.49466	6.66347	6.06843	1.12492	1.15416	1.05109	0.169822	0.20684	0.0718915	0.0566866	0.0462161	0.0849167	0.0807007
sp|Q96DR8|MUCL1_HUMAN	MUCL1	MUCL1_HUMAN Mucin-like protein 1	4	3.53852	2.50974	4.19688	4.6418	2.87767	43.6482	4.08224	1.47342	3.16655	5.09166	6.62951	2.29318	2.6611	4.86758	4.59073	3.73124	3.72173	13.0204	4.29523	3.96266	3.49847	1.15409	1.06474	1.80672	0.206758	0.0904948	0.248923	1.57033	0.453152	0.250708
sp|Q7L8W6|DPH6_HUMAN	DPH6	DPH6_HUMAN Diphthine--ammonia ligase	2	5.36406	6.06911	5.7656	6.27412	6.14277	6.46927	6.82362	7.03833	7.04258	6.67308	6.83042	6.54105	5.51445	5.0034	6.08388	6.36427	5.86822	6.6185	6.77178	5.7415	1.12785	1.15398	0.978405	0.17358	0.206612	-0.0314959	0.067437	0.0596075	0.0318721	0.105533
sp|Q96S21|RB40C_HUMAN	RAB40C	RB40C_HUMAN Ras-related protein Rab-40C	2	4.96509	5.53346	5.88009	6.65651	6.36456	5.99235	6.88174	6.88582	6.0784	6.09703	7.27401	7.12943	6.32826	5.56411	6.03863	6.3305	5.75879	6.53112	6.64472	6.06538	1.13411	1.15384	1.05324	0.181565	0.206443	0.0748318	0.122843	0.0665506	0.0972078	0.05955
sp|A6QL63|BTBDB_HUMAN	BTBD11	BTBDB_HUMAN Ankyrin repeat and BTB/POZ domain-containing protein BTBD11	2	5.15621	5.80322	5.84085	6.15601	6.28035	6.80537	7.29499	6.55306	7.0714	6.10556	6.70581	6.60184	6.56312	5.36014	6.22904	5.47301	5.73907	6.73344	6.62115	5.90633	1.17326	1.1537	1.02914	0.230527	0.206265	0.0414438	0.0731022	0.0640695	0.0601664	0.0988014
sp|Q6NXT4-2|ZNT6_HUMAN	SLC30A6	ZNT6_HUMAN Isoform 2 of Zinc transporter 6	1	5.52003	6.16291	6.19995	6.49986	6.51338	6.2467	6.21686	6.56419	7.60229	6.77197	6.60361	7.15132	5.36569	5.31834	6.08002	5.18287	6.09569	6.38528	7.0323	5.48673	1.04751	1.15365	0.9001	0.0669615	0.206207	-0.151842	0.0676481	0.0280135	0.0630942	0.0734577
sp|Q8NCE0|SEN2_HUMAN	TSEN2	SEN2_HUMAN tRNA-splicing endonuclease subunit Sen2	8	4.93365	5.91021	6.40686	6.51805	6.16077	6.48357	6.83164	6.8707	6.72411	6.33288	7.22189	7.13796	5.68943	4.80361	6.11747	5.8572	5.94219	6.58667	6.85421	5.61693	1.10846	1.15348	0.945262	0.148554	0.205995	-0.0812142	0.121576	0.0505594	0.059824	0.101495
sp|A0AVT1|UBA6_HUMAN	UBA6	UBA6_HUMAN Ubiquitin-like modifier-activating enzyme 6	52	5.23544	5.98126	5.6903	6.354	6.41349	6.60067	6.65582	7.00951	6.7351	6.61042	6.8064	6.67811	5.98801	5.28598	6.21467	5.74083	5.81525	6.66987	6.70751	5.80737	1.14696	1.15343	0.998645	0.197818	0.205936	-0.00195564	0.0812418	0.037339	0.0124233	0.0685038
sp|Q5SNV9-2|CA167_HUMAN	C1orf167	CA167_HUMAN Isoform 2 of Uncharacterized protein C1orf167	2	5.70893	6.22198	6.74135	6.06485	5.88163	6.84059	6.83264	7.8676	7.44021	7.70159	7.67031	5.71405	4.95976	5.13712	4.03695	5.18043	6.18428	6.85561	7.13154	4.82857	1.10856	1.15317	0.780781	0.148681	0.205609	-0.357011	0.0693598	0.118308	0.133513	0.11107
sp|Q12965|MYO1E_HUMAN	MYO1E	MYO1E_HUMAN Unconventional myosin-Ie	24	5.82861	6.0654	5.82235	6.15568	6.47588	6.96202	6.88483	7.22543	6.85056	6.67125	7.08304	6.92326	5.90307	4.85691	5.04005	5.25166	5.96801	6.88704	6.88203	5.26292	1.15399	1.15315	0.881856	0.206634	0.205584	-0.181386	0.0282632	0.0450813	0.0248191	0.0866873
sp|Q86WA6|BPHL_HUMAN	BPHL	BPHL_HUMAN Valacyclovir hydrolase	6	5.36556	5.9168	5.64654	6.12544	6.55989	6.36359	6.46569	6.99028	6.66628	6.58527	6.94707	6.38448	6.17255	5.64107	6.15864	6.01086	5.76358	6.59486	6.64578	5.99578	1.14423	1.15306	1.04029	0.194376	0.205471	0.056981	0.0572418	0.0417795	0.0350887	0.0412845
sp|O60783|RT14_HUMAN	MRPS14	RT14_HUMAN 28S ribosomal protein S14, mitochondrial	2	5.43899	5.99445	6.3476	5.95397	6.03524	7.13255	6.48443	6.30985	7.27087	6.26946	7.126	6.699	5.09761	5.7163	6.76507	5.3586	5.93375	6.49052	6.84133	5.7344	1.09383	1.15295	0.966403	0.129389	0.205333	-0.0493035	0.0630686	0.0718352	0.0660648	0.127725
tr|G3V2A3|G3V2A3_HUMAN	TUBB3	G3V2A3_HUMAN Tubulin beta-3 chain (Fragment)	1	5.9508	4.65941	4.96849	7.16244	6.21703	6.72725	5.11909	6.60004	6.34317	7.15477	6.62086	6.09273	7.66701	6.73925	5.60136	6.3763	5.68529	6.16585	6.55288	6.59598	1.08453	1.1526	1.16018	0.117068	0.204897	0.214354	0.198447	0.118517	0.0695208	0.129981
sp|Q9NRB3|CHSTC_HUMAN	CHST12	CHSTC_HUMAN Carbohydrate sulfotransferase 12	2	5.31228	5.36471	6.68965	6.48131	6.46941	5.43437	6.86208	6.6844	6.88627	6.35036	7.17627	7.06374	6.17805	4.80131	6.14992	6.09585	5.96199	6.36257	6.86916	5.80628	1.06719	1.15216	0.973884	0.0938151	0.20434	-0.0381786	0.121649	0.100476	0.0532655	0.115539
sp|Q9BUP3-3|HTAI2_HUMAN	HTATIP2	HTAI2_HUMAN Isoform 3 of Oxidoreductase HTATIP2	11	5.18178	5.8741	6.0825	6.32064	6.242	6.54922	6.90715	7.35409	6.67218	6.34326	7.08229	6.93073	5.82888	4.8942	5.95656	5.78042	5.86475	6.76311	6.75711	5.61501	1.15318	1.15216	0.957417	0.205617	0.204337	-0.062781	0.0836361	0.0707732	0.047907	0.0865986
tr|B7Z3Y2|B7Z3Y2_HUMAN	PCYOX1	B7Z3Y2_HUMAN Prenylcysteine oxidase 1	1	5.09951	5.21831	5.75751	6.66364	7.02797	6.06927	5.96661	6.56781	7.23518	6.22435	6.67843	6.06025	5.86351	6.15101	6.91618	6.50047	5.68474	6.40791	6.54955	6.35779	1.12721	1.15213	1.1184	0.17276	0.204301	0.161431	0.125361	0.0764236	0.0803998	0.0714592
sp|P60842|IF4A1_HUMAN	EIF4A1	IF4A1_HUMAN Eukaryotic initiation factor 4A-I	52	5.36814	6.05244	5.89763	5.95393	6.80329	7.72721	7.20668	6.8824	6.58215	7.09892	6.78642	6.34493	5.56203	5.01843	5.57742	5.13799	5.81804	7.1549	6.7031	5.32397	1.22978	1.15213	0.91508	0.298399	0.204298	-0.12803	0.0527116	0.0586404	0.047687	0.0540972
sp|A6NED2|RCCD1_HUMAN	RCCD1	RCCD1_HUMAN RCC1 domain-containing protein 1	2	5.05873	6.70645	6.1346	5.95817	6.74699	5.55201	5.98504	6.19986	6.63981	5.92758	6.64012	8.27962	6.05107	5.31873	6.60353	6.19768	5.96449	6.12097	6.87178	6.04275	1.02624	1.15212	1.01312	0.0373633	0.204286	0.0188077	0.114528	0.0811573	0.145061	0.0887457
sp|P49137|MAPK2_HUMAN	MAPKAPK2	MAPK2_HUMAN MAP kinase-activated protein kinase 2	9	5.04846	5.71976	6.07465	6.49455	6.2612	6.34552	6.80552	6.87558	6.40711	6.62664	6.94148	6.91118	6.05946	5.1021	6.41893	5.90786	5.83435	6.57195	6.7216	5.87209	1.12642	1.15207	1.00647	0.171749	0.204232	0.00930029	0.10493	0.0476813	0.0376577	0.094731
sp|Q8IWW6-3|RHG12_HUMAN	ARHGAP12	RHG12_HUMAN Isoform 3 of Rho GTPase-activating protein 12	1	4.99104	5.50693	6.0717	6.58152	6.6452	5.60866	6.69337	8.25736	6.50746	6.18514	6.98834	6.99071	6.37357	4.47318	6.11965	6.00617	5.7878	6.80115	6.66791	5.74314	1.17508	1.15206	0.992285	0.232764	0.204221	-0.0111741	0.119049	0.160586	0.0590876	0.149824
tr|H0Y9S9|H0Y9S9_HUMAN	PPIP5K2	H0Y9S9_HUMAN Inositol hexakisphosphate and diphosphoinositol-pentakisphosphate kinase 2 (Fragment)	1	4.36682	6.89897	5.5568	6.91535	5.76291	6.59201	6.04423	6.66365	6.33563	6.83096	6.46276	7.70612	5.82394	4.6036	7.48857	5.9477	5.93448	6.2657	6.83387	5.96595	1.05581	1.15155	1.0053	0.0783529	0.203579	0.00762965	0.206207	0.0693653	0.0904723	0.198207
sp|Q96I99|SUCB2_HUMAN	SUCLG2	SUCB2_HUMAN Succinyl-CoA ligase [GDP-forming] subunit beta, mitochondrial	30	5.01076	5.8529	5.75735	6.28234	6.36277	6.45341	7.01845	7.20613	6.48399	6.1178	6.95918	6.81218	5.96997	5.00476	6.84054	5.86746	5.72584	6.76019	6.59329	5.92068	1.18065	1.1515	1.03403	0.239577	0.203511	0.0482768	0.0923137	0.0614448	0.0567377	0.12678
sp|Q6NXG1|ESRP1_HUMAN	ESRP1	ESRP1_HUMAN Epithelial splicing regulatory protein 1	22	5.19678	5.85183	5.85579	6.43769	6.57753	6.7563	6.92225	7.04137	6.74494	6.59015	6.80166	6.73743	5.85287	4.97441	6.05282	5.60619	5.83552	6.82436	6.71854	5.62157	1.16945	1.15132	0.963337	0.225832	0.203287	-0.0538881	0.0868889	0.0295782	0.0134361	0.083343
sp|O60942|MCE1_HUMAN	RNGTT	MCE1_HUMAN mRNA-capping enzyme	19	5.24885	5.9743	5.99633	6.40144	6.14991	6.55076	6.65013	7.06104	6.76165	6.47422	7.11617	6.84142	5.88312	5.39699	5.80763	5.68603	5.90523	6.60296	6.79837	5.69344	1.11815	1.15124	0.964136	0.16112	0.203195	-0.052692	0.0812209	0.0566692	0.0388499	0.0375279
sp|O14727|APAF_HUMAN	APAF1	APAF_HUMAN Apoptotic protease-activating factor 1	5	5.27004	6.13127	5.7696	6.42001	7.10705	6.6135	6.35718	6.48444	6.52343	6.53908	6.97743	7.11509	5.66911	5.31142	5.87961	5.83174	5.89773	6.64054	6.78876	5.67297	1.12595	1.15108	0.96189	0.171141	0.202988	-0.0560555	0.084082	0.0494143	0.044584	0.045359
sp|Q9H999|PANK3_HUMAN	PANK3	PANK3_HUMAN Pantothenate kinase 3	3	5.45374	5.72079	5.8606	7.00632	6.74351	6.33916	6.45434	6.33169	6.98098	7.2034	6.57934	6.90531	6.45789	4.20781	5.61267	6.14246	6.01036	6.46718	6.91726	5.60521	1.076	1.15089	0.932591	0.105684	0.202748	-0.100684	0.113985	0.0297792	0.0373519	0.177466
sp|Q9HC98-2|NEK6_HUMAN	NEK6	NEK6_HUMAN Isoform 2 of Serine/threonine-protein kinase Nek6	2	4.93531	6.15227	6.31805	7.00035	6.00194	6.67265	6.74642	6.9796	7.05756	6.9141	7.25752	6.85762	5.61693	4.86657	5.24698	5.37613	6.10149	6.60015	7.0217	5.27665	1.08173	1.15082	0.864813	0.113337	0.202658	-0.20954	0.140905	0.0635921	0.025396	0.0594012
sp|Q9NUY8|TBC23_HUMAN	TBC1D23	TBC23_HUMAN TBC1 domain family member 23	6	5.28514	5.70157	6.00347	6.45405	6.21982	6.56434	6.3876	7.01505	7.0285	6.32415	6.63837	6.98826	5.82011	5.20557	6.42423	5.93978	5.86106	6.5467	6.74482	5.84742	1.11698	1.15079	0.997674	0.159607	0.202619	-0.00336016	0.0841083	0.0523095	0.0490261	0.0857331
sp|Q9Y2T2|AP3M1_HUMAN	AP3M1	AP3M1_HUMAN AP-3 complex subunit mu-1	10	5.00863	5.73271	6.02195	6.62119	6.03212	6.49984	6.67512	6.7931	6.4135	6.61956	6.98738	6.88829	6.0359	5.60244	6.06858	5.99969	5.84612	6.50004	6.72718	5.92665	1.11186	1.15071	1.01378	0.15297	0.202523	0.019738	0.114572	0.051447	0.0387289	0.0367771
sp|Q96JW4|S41A2_HUMAN	SLC41A2	S41A2_HUMAN Solute carrier family 41 member 2	2	5.52103	5.50409	4.96403	5.75404	6.99838	7.30133	6.74922	5.88707	5.81339	5.70462	5.95415	7.5431	6.20072	6.11333	6.87657	7.11494	5.4358	6.734	6.25382	6.57639	1.23882	1.15049	1.20983	0.308972	0.202245	0.274804	0.0615457	0.0902999	0.138407	0.0753011
sp|Q8NG68|TTL_HUMAN	TTL	TTL_HUMAN Tubulin--tyrosine ligase	2	5.01246	5.87981	6.4247	6.16162	6.76341	6.58216	6.47775	6.64943	6.90987	6.97386	6.32463	6.80278	5.86842	6.20218	5.43796	5.52896	5.86965	6.61819	6.75278	5.75938	1.12753	1.15046	0.981214	0.173162	0.202209	-0.0273604	0.104477	0.018108	0.0435425	0.0605107
sp|Q9BQL6|FERM1_HUMAN	FERMT1	FERM1_HUMAN Fermitin family homolog 1	19	5.11813	5.88938	5.86978	6.42627	6.44494	6.67041	6.94634	7.23541	6.77298	6.45895	6.92587	6.64603	5.92426	5.07755	5.99729	5.5964	5.82589	6.82428	6.70096	5.64887	1.17137	1.1502	0.969616	0.228197	0.201889	-0.0445149	0.0922935	0.0501587	0.029516	0.0741538
sp|O43865|SAHH2_HUMAN	AHCYL1	SAHH2_HUMAN Putative adenosylhomocysteinase 2	11	4.75421	5.83079	5.90749	6.46553	6.1379	6.49004	6.75211	7.01029	6.15009	6.14849	7.13479	6.9719	6.05006	5.07702	6.80642	6.31287	5.73951	6.59758	6.60132	6.06159	1.1495	1.15015	1.05612	0.201012	0.201828	0.0787706	0.124608	0.056515	0.0797077	0.120005
sp|Q7Z6M2|FBX33_HUMAN	FBXO33	FBX33_HUMAN F-box only protein 33	1	5.83749	5.73029	5.81969	6.59908	6.05049	5.98443	6.51252	6.20396	6.36341	6.0572	7.8459	7.31554	5.84399	5.55339	6.568	5.71462	5.99664	6.18785	6.89551	5.92	1.03189	1.1499	0.98722	0.0452845	0.201504	-0.0185566	0.0674308	0.0380054	0.120335	0.0756853
sp|P0C869-6|PA24B_HUMAN	PLA2G4B	PA24B_HUMAN Isoform 5 of Cytosolic phospholipase A2 beta	2	5.77631	6.20691	5.9066	5.84639	6.32604	7.98793	8.3295	6.45329	6.41246	7.82883	7.25542	5.78563	4.87599	4.59613	5.54857	4.86401	5.93405	7.27419	6.82059	4.97118	1.22584	1.1494	0.837737	0.293769	0.200878	-0.255431	0.0319405	0.141891	0.132315	0.0816775
sp|Q9NV31|IMP3_HUMAN	IMP3	IMP3_HUMAN U3 small nucleolar ribonucleoprotein protein IMP3	4	5.87271	5.20602	6.20092	5.10196	4.55699	4.63655	5.08375	4.51033	10.3454	5.56436	5.17671	4.63755	4.46749	18.3653	4.43772	5.83627	5.5954	4.6969	6.431	8.2767	0.839422	1.14934	1.4792	-0.252532	0.200802	0.564813	0.094493	0.0560174	0.410064	0.816425
sp|Q9HBI1|PARVB_HUMAN	PARVB	PARVB_HUMAN Beta-parvin	3	5.05395	5.60756	6.3799	6.86334	6.1412	6.36721	6.5742	6.63504	6.94017	6.91288	7.03093	6.59029	6.0053	5.50468	5.77209	5.62127	5.97619	6.42941	6.86857	5.72583	1.07584	1.14932	0.958108	0.105462	0.200784	-0.0617393	0.134436	0.0347998	0.0279911	0.0377393
sp|Q9NVE5-3|UBP40_HUMAN	USP40	UBP40_HUMAN Isoform 3 of Ubiquitin carboxyl-terminal hydrolase 40	1	5.7753	6.03489	5.68262	6.32341	6.72459	6.75572	6.25979	6.88061	6.95858	7.66391	6.23572	6.51272	5.96882	5.78003	5.39308	5.05022	5.95405	6.65518	6.84273	5.54804	1.11776	1.14926	0.931808	0.160605	0.2007	-0.101895	0.0483466	0.040882	0.0910744	0.0737836
sp|Q96SU4|OSBL9_HUMAN	OSBPL9	OSBL9_HUMAN Oxysterol-binding protein-related protein 9	13	5.20508	5.7153	5.91719	6.74835	6.20147	6.48863	6.67191	6.85319	6.56122	6.46926	7.02199	7.05302	6.07206	5.26797	6.07745	5.6759	5.89648	6.5538	6.77637	5.77334	1.11148	1.14922	0.979117	0.152478	0.200659	-0.0304465	0.1089	0.0424287	0.0448798	0.0668307
sp|P50148|GNAQ_HUMAN	GNAQ	GNAQ_HUMAN Guanine nucleotide-binding protein G(q) subunit alpha	3	5.32991	6.04598	5.79739	6.27463	6.71138	6.29064	6.76205	6.91187	7.18014	5.97751	7.27331	6.51544	6.30526	5.08052	6.17634	5.36763	5.86198	6.66899	6.7366	5.73244	1.13767	1.1492	0.977902	0.18608	0.200633	-0.0322387	0.0690424	0.039917	0.0902908	0.104825
sp|Q6STE5|SMRD3_HUMAN	SMARCD3	SMRD3_HUMAN SWI/SNF-related matrix-associated actin-dependent regulator of chromatin subfamily D member 3	1	5.26276	6.66066	5.87572	6.09129	5.73508	7.19694	6.60317	5.15555	6.89628	7.49924	7.15276	5.9056	6.24646	4.96661	6.62609	6.12578	5.97261	6.17268	6.86347	5.99123	1.0335	1.14916	1.00312	0.0475373	0.200577	0.00449251	0.0967037	0.146715	0.0997615	0.119437
sp|O95214-2|LERL1_HUMAN	LEPROTL1	LERL1_HUMAN Isoform 2 of Leptin receptor overlapping transcript-like 1	1	5.77357	6.02975	5.49389	6.21855	6.90989	5.95009	6.151	6.93503	7.33849	6.47423	6.68001	6.53048	6.63889	5.28352	5.89208	5.70052	5.87894	6.4865	6.7558	5.87875	1.10335	1.14915	0.999968	0.141885	0.200571	-4.60133e-05	0.0535604	0.0786467	0.0589192	0.0964284
sp|P51817|PRKX_HUMAN	PRKX	PRKX_HUMAN cAMP-dependent protein kinase catalytic subunit PRKX	1	5.12365	6.34444	6.46399	6.11753	5.80362	6.68227	6.29494	7.17731	6.82417	6.44803	7.53768	6.82433	5.35389	4.87912	6.52934	5.59566	6.0124	6.48954	6.90855	5.5895	1.07936	1.14905	0.929662	0.110174	0.200442	-0.105222	0.101403	0.0897867	0.0659145	0.1241
sp|O76027|ANXA9_HUMAN	ANXA9	ANXA9_HUMAN Annexin A9	1	4.70354	5.78906	6.68965	7.09659	5.90503	6.02641	7.54053	7.52109	7.1321	6.32826	7.92316	6.51382	5.51514	4.68988	5.18067	5.44507	6.06971	6.74826	6.97433	5.20769	1.11179	1.14904	0.85798	0.152889	0.200428	-0.220984	0.174979	0.134108	0.103217	0.0718258
sp|Q9BT40|INP5K_HUMAN	INPP5K	INP5K_HUMAN Inositol polyphosphate 5-phosphatase K	4	5.28006	5.91198	6.09603	6.5907	6.23799	6.26177	6.76161	6.99297	6.92085	6.3539	7.27404	6.88755	5.4165	5.46937	5.98366	5.56104	5.96969	6.56358	6.85909	5.60764	1.09948	1.14898	0.939352	0.136827	0.20036	-0.0902622	0.090753	0.0570531	0.0553258	0.0459537
sp|Q86UA1|PRP39_HUMAN	PRPF39	PRP39_HUMAN Pre-mRNA-processing factor 39	18	5.05488	5.93032	6.04881	6.75628	6.32741	6.22334	6.62205	7.19106	6.74565	6.46017	7.1775	6.94898	5.71213	4.92433	6.0188	5.85829	5.94757	6.59097	6.83307	5.62839	1.10818	1.14888	0.946334	0.148189	0.200234	-0.0795793	0.117352	0.0658839	0.0446109	0.0863114
sp|P23443|KS6B1_HUMAN	RPS6KB1	KS6B1_HUMAN Ribosomal protein S6 kinase beta-1	9	5.26575	5.84423	5.58562	5.98259	6.45142	6.5025	6.37021	6.85146	6.47321	6.61549	6.39151	6.57131	6.22057	5.85217	6.62403	6.39793	5.66955	6.5439	6.51288	6.27367	1.15422	1.14875	1.10656	0.206917	0.200062	0.146077	0.0556468	0.0324201	0.0154173	0.0519507
sp|P07947|YES_HUMAN	YES1	YES_HUMAN Tyrosine-protein kinase Yes	13	5.46543	5.60759	5.96442	6.12867	6.33449	6.67061	6.92272	7.0052	6.66867	6.39402	6.77646	6.76725	6.09189	5.18563	6.08843	5.92853	5.79153	6.73325	6.6516	5.82362	1.1626	1.14851	1.00554	0.21736	0.199758	0.00797232	0.0531005	0.0447845	0.026838	0.0741978
sp|Q14691|PSF1_HUMAN	GINS1	PSF1_HUMAN DNA replication complex GINS protein PSF1	5	4.84311	6.07583	5.89549	6.31282	6.35132	6.54075	6.85287	6.8734	6.57207	6.56917	6.84759	6.57147	5.96254	4.87083	6.86431	5.99643	5.78181	6.65458	6.64007	5.92353	1.15095	1.14844	1.02451	0.202827	0.199678	0.0349347	0.1122	0.0380286	0.0208355	0.137842
sp|O95363|SYFM_HUMAN	FARS2	SYFM_HUMAN Phenylalanine--tRNA ligase, mitochondrial	6	5.40299	6.21283	5.97986	6.36531	6.45115	6.74286	6.55834	6.80424	6.94704	6.48245	7.0404	7.04451	5.67825	5.11676	5.64397	5.52902	5.99025	6.63915	6.8786	5.492	1.10833	1.1483	0.916824	0.148382	0.199499	-0.125284	0.0705099	0.0245787	0.0389481	0.0470089
sp|P27986-4|P85A_HUMAN	PIK3R1	P85A_HUMAN Isoform 4 of Phosphatidylinositol 3-kinase regulatory subunit alpha	9	5.14804	5.91076	5.98032	6.1342	6.2842	6.48845	6.65832	6.94529	6.73035	6.22529	6.82574	6.82287	6.13285	5.49271	6.33408	5.88652	5.79333	6.59407	6.65106	5.96154	1.13822	1.14806	1.02904	0.186775	0.199192	0.0412922	0.0759851	0.0424135	0.0431939	0.0607558
tr|C9JF35|C9JF35_HUMAN	NAMPT	C9JF35_HUMAN Nicotinamide phosphoribosyltransferase (Fragment)	1	4.93942	6.49359	6.01427	6.37275	6.87805	6.4095	6.2778	6.58563	6.91081	7.25993	6.90587	6.26598	5.45328	5.98469	5.12998	6.11847	5.95501	6.53774	6.83565	5.6716	1.09786	1.14788	0.952409	0.13469	0.198975	-0.0703463	0.118722	0.0397022	0.0606196	0.0813567
sp|P21439|MDR3_HUMAN	ABCB4	MDR3_HUMAN Multidrug resistance protein 3	1	5.62994	6.82418	5.73468	5.45375	6.91961	6.06682	6.65636	7.06874	6.85312	6.5441	7.20264	6.53793	5.37559	5.29853	5.36409	6.46991	5.91064	6.67788	6.78445	5.62703	1.12981	1.14784	0.952017	0.176077	0.198918	-0.0709401	0.104889	0.0661305	0.0464659	0.100043
sp|Q96IY1|NSL1_HUMAN	NSL1	NSL1_HUMAN Kinetochore-associated protein NSL1 homolog	5	4.95767	5.88089	5.89483	6.60455	6.08421	6.62368	6.83604	6.98417	6.19795	6.50123	7.27008	6.81815	5.62841	5.51033	6.37786	5.82994	5.83448	6.63202	6.69685	5.83663	1.13669	1.14781	1.00037	0.184844	0.198878	0.000531533	0.115722	0.0594145	0.0684546	0.0658236
sp|Q9UJ72|ANX10_HUMAN	ANXA10	ANX10_HUMAN Annexin A10	2	5.46841	5.69263	6.16454	5.87911	6.15357	7.05956	6.20527	7.33395	6.47492	6.5035	6.46123	7.19213	5.57522	6.03635	5.87483	5.92479	5.80117	6.68809	6.65794	5.8528	1.15289	1.14769	1.0089	0.205249	0.198732	0.0127818	0.0508077	0.0894602	0.0535538	0.0336565
sp|Q7Z6M4|MTER2_HUMAN	MTERFD2	MTER2_HUMAN mTERF domain-containing protein 2	2	5.36077	6.54926	5.99238	6.04817	6.44837	6.48739	6.82686	6.18174	7.24162	6.31891	7.39195	6.5322	5.84792	5.24264	5.65701	5.87281	5.98764	6.48609	6.87117	5.6551	1.08325	1.14756	0.944461	0.11536	0.198567	-0.0824374	0.0813663	0.0408084	0.0764737	0.0515249
sp|P53597|SUCA_HUMAN	SUCLG1	SUCA_HUMAN Succinyl-CoA ligase [ADP/GDP-forming] subunit alpha, mitochondrial	23	4.80757	5.68551	5.98259	6.68899	6.15958	6.39463	6.76004	7.31018	6.36988	6.07038	7.00415	7.1363	5.88868	5.086	6.62209	6.03344	5.79117	6.65611	6.64518	5.90755	1.14936	1.14747	1.0201	0.200825	0.198454	0.0287069	0.134546	0.0752952	0.0765476	0.107135
sp|Q9H668|STN1_HUMAN	OBFC1	STN1_HUMAN CST complex subunit STN1	1	5.28889	6.71083	4.99634	5.68951	7.21882	6.62331	6.89673	6.61808	6.56236	6.29655	6.59401	6.57313	6.43889	5.45274	6.22557	5.81423	5.67139	6.83924	6.50651	5.98286	1.20592	1.14725	1.05492	0.270132	0.198181	0.0771317	0.132057	0.041607	0.0216076	0.0732602
sp|Q9UBT7|CTNL1_HUMAN	CTNNAL1	CTNL1_HUMAN Alpha-catulin	5	5.33314	6.064	6.04303	6.21336	6.39395	6.66248	6.46554	7.11292	6.63115	6.52065	7.07168	6.90971	5.7609	5.17284	5.7854	5.85925	5.91338	6.65872	6.7833	5.6446	1.12604	1.14711	0.954546	0.171262	0.198003	-0.0671129	0.066661	0.0485656	0.0372246	0.0562079
sp|Q96I59|SYNM_HUMAN	NARS2	SYNM_HUMAN Probable asparagine--tRNA ligase, mitochondrial	17	4.47061	5.77694	6.36349	6.67778	6.46561	6.46309	6.91907	6.69271	6.34797	6.41411	6.99554	6.9569	5.87083	4.64607	6.72254	6.21673	5.82221	6.63512	6.67863	5.86404	1.13962	1.1471	1.00719	0.188557	0.197987	0.0103299	0.16752	0.0328209	0.0516644	0.150767
tr|E7EX29|E7EX29_HUMAN	YWHAZ	E7EX29_HUMAN 14-3-3 protein zeta/delta (Fragment)	1	4.13722	7.00687	6.21741	5.79964	7.03508	5.90603	5.32785	5.74309	6.15826	6.57867	8.50437	5.31892	4.18209	6.46538	7.2939	8.32523	5.79028	6.00301	6.64006	6.56665	1.03674	1.14676	1.13408	0.0520523	0.197561	0.181523	0.20904	0.121578	0.203116	0.268382
sp|P08758|ANXA5_HUMAN	ANXA5	ANXA5_HUMAN Annexin A5	93	5.23416	5.94133	5.91312	6.17142	6.4891	6.68868	6.79053	7.00156	6.59808	6.50637	6.75866	6.80175	5.90881	5.0704	6.31511	5.81091	5.81501	6.74247	6.66621	5.77631	1.15949	1.14638	0.993345	0.213496	0.197087	-0.00963351	0.0695002	0.0316395	0.0206972	0.08981
sp|Q8WVZ9|KBTB7_HUMAN	KBTBD7	KBTB7_HUMAN Kelch repeat and BTB domain-containing protein 7	4	5.21587	5.071	6.13512	6.77953	6.3706	6.32348	6.63059	7.17454	6.29781	6.8847	6.62795	6.78334	6.22553	5.65416	5.8874	5.93838	5.80038	6.6248	6.64845	5.92637	1.14213	1.14621	1.02172	0.19173	0.196871	0.0310007	0.138797	0.0589573	0.0385805	0.0396033
sp|Q6P597-3|KLC3_HUMAN	KLC3	KLC3_HUMAN Isoform 3 of Kinesin light chain 3	14	5.01891	5.93004	6.19514	6.1365	6.26112	6.4841	6.62082	6.72018	6.4959	6.30182	6.99173	6.88178	5.96657	5.50764	6.58697	5.90079	5.82015	6.52155	6.66781	5.99049	1.12051	1.14564	1.02927	0.16416	0.196157	0.0416189	0.0938335	0.0304797	0.0485362	0.0745014
sp|Q9HBU6|EKI1_HUMAN	ETNK1	EKI1_HUMAN Ethanolamine kinase 1	8	5.27751	5.76312	6.08898	6.25267	6.16709	6.0514	6.88445	6.83234	6.3057	6.54762	7.02076	6.9096	5.86736	5.44556	6.56665	6.01921	5.84557	6.48382	6.69592	5.9747	1.10919	1.14547	1.02209	0.1495	0.195939	0.0315214	0.0735447	0.0671846	0.049189	0.0775411
sp|Q9NTK5|OLA1_HUMAN	OLA1	OLA1_HUMAN Obg-like ATPase 1	58	5.02533	5.65381	6.02549	6.36381	6.17794	6.51556	6.99047	7.30588	6.30954	6.20264	7.15015	6.75805	5.70554	5.02097	6.78017	6.01467	5.76711	6.74746	6.6051	5.88034	1.16999	1.1453	1.01963	0.226497	0.195731	0.0280504	0.0994018	0.0740534	0.0659816	0.124069
sp|Q8IYR2|SMYD4_HUMAN	SMYD4	SMYD4_HUMAN SET and MYND domain-containing protein 4	3	5.53229	5.89358	6.41584	6.22006	6.4478	6.09158	6.80666	6.57731	6.98003	6.60264	7.2206	6.75061	5.86093	5.53883	5.31638	5.74484	6.01544	6.48084	6.88847	5.61524	1.07737	1.14513	0.933472	0.107509	0.195513	-0.0993219	0.0644179	0.0461254	0.0392584	0.0426808
sp|Q86UX6|ST32C_HUMAN	STK32C	ST32C_HUMAN Serine/threonine-protein kinase 32C	1	5.1569	6.15206	6.4522	6.58142	5.64718	6.45192	6.64772	6.39877	7.40896	6.59119	6.18322	7.6841	6.05753	5.69378	5.56546	5.32758	6.08564	6.2864	6.96687	5.66109	1.03299	1.1448	0.930236	0.0468233	0.1951	-0.104331	0.105947	0.0698946	0.100308	0.0538314
sp|Q567V2|M17L2_HUMAN	MPV17L2	M17L2_HUMAN Mpv17-like protein 2	1	5.39824	6.62108	6.04499	6.10795	6.0776	6.39468	6.54749	6.34778	5.73406	5.35581	9.31772	7.26191	6.69097	5.79777	4.64126	5.6607	6.04306	6.34189	6.91737	5.69768	1.04945	1.14468	0.942845	0.0696318	0.194944	-0.0849071	0.0829661	0.0308646	0.260202	0.147332
sp|Q9HCH0|NCK5L_HUMAN	NCKAP5L	NCK5L_HUMAN Nck-associated protein 5-like	1	5.56562	5.75958	6.15126	5.80904	6.00221	5.61355	6.00346	5.40478	7.06804	7.15618	6.99211	5.43626	6.75218	8.50895	5.98847	5.78832	5.82137	5.756	6.66315	6.75948	0.98877	1.1446	1.16115	-0.0162934	0.194844	0.215552	0.0418672	0.0516837	0.123165	0.183158
sp|P15336|ATF2_HUMAN	ATF2	ATF2_HUMAN Cyclic AMP-dependent transcription factor ATF-2	2	5.27126	6.09286	5.93959	6.56389	5.79235	6.04757	6.02054	7.11834	6.4847	6.40725	6.93842	7.48337	5.62067	5.15658	6.67989	6.38272	5.9669	6.2447	6.82844	5.95996	1.04656	1.14439	0.998838	0.0656507	0.194573	-0.00167774	0.0895698	0.0950518	0.0725655	0.116952
sp|P30419|NMT1_HUMAN	NMT1	NMT1_HUMAN Glycylpeptide N-tetradecanoyltransferase 1	21	5.07502	6.03657	5.92735	6.40523	6.3368	6.56779	6.59616	7.15209	6.58254	6.54761	6.87384	6.82397	6.00153	4.95774	6.06248	6.05327	5.86104	6.66321	6.70699	5.76876	1.13686	1.14433	0.984254	0.18506	0.194508	-0.0228973	0.0959706	0.0519269	0.0247121	0.0938403
sp|O94901-9|SUN1_HUMAN	SUN1	SUN1_HUMAN Isoform 9 of SUN domain-containing protein 1	1	5.80785	6.08527	4.99183	7.40975	5.64128	5.73593	5.90049	6.88372	6.90759	6.05209	6.84251	7.99711	7.49691	5.29498	5.30249	5.6502	6.07367	6.04035	6.94982	5.93614	0.994514	1.14425	0.977356	-0.00793637	0.194407	-0.0330434	0.165365	0.0947548	0.114992	0.177493
sp|Q9HBL8|NMRL1_HUMAN	NMRAL1	NMRL1_HUMAN NmrA-like family domain-containing protein 1	5	4.92483	5.7314	6.24595	6.64704	6.00881	6.2825	6.65972	6.79295	6.46044	6.14711	7.42386	6.91378	6.08768	5.24306	6.45646	5.97441	5.88731	6.436	6.7363	5.9404	1.0932	1.14421	1.00902	0.128556	0.194348	0.0129533	0.126217	0.0555541	0.0825412	0.0855855
sp|Q92597|NDRG1_HUMAN	NDRG1	NDRG1_HUMAN Protein NDRG1	7	5.3278	5.8829	6.04313	6.34649	6.16044	6.49392	6.83961	6.61804	6.33666	6.64791	7.2462	6.77115	5.85208	5.11154	6.22665	6.09547	5.90008	6.528	6.75048	5.82143	1.10643	1.14413	0.986671	0.145907	0.194256	-0.0193597	0.0724088	0.0434601	0.055949	0.0855558
sp|Q12893|TM115_HUMAN	TMEM115	TM115_HUMAN Transmembrane protein 115	2	5.66634	6.48441	6.29656	6.17488	6.63482	5.79197	6.13141	6.28514	8.49171	6.47617	6.15344	7.04453	5.30076	6.10424	5.45442	5.50918	6.15555	6.21083	7.04146	5.59215	1.00898	1.14392	0.908473	0.0129001	0.193988	-0.138484	0.0568773	0.0563179	0.146934	0.0630542
sp|Q9HBH5|RDH14_HUMAN	RDH14	RDH14_HUMAN Retinol dehydrogenase 14	5	5.35406	5.73918	5.48882	6.29602	6.31276	6.84274	6.44926	6.65058	6.68216	6.29029	6.71843	6.47894	7.8911	4.8254	6.00755	5.97271	5.71952	6.56383	6.54246	6.17419	1.14762	1.14388	1.07949	0.198645	0.193938	0.110356	0.0727582	0.0353459	0.0303274	0.205624
sp|Q8NB14|UBP38_HUMAN	USP38	UBP38_HUMAN Ubiquitin carboxyl-terminal hydrolase 38	2	5.39506	5.61983	6.28394	6.4149	6.39406	6.41851	6.35146	6.70908	6.94568	6.38184	6.56885	7.229	6.6424	5.29226	5.97157	5.38155	5.92843	6.46828	6.78134	5.82195	1.09106	1.14387	0.982038	0.125731	0.19392	-0.0261495	0.0839311	0.0251857	0.0559688	0.107269
sp|Q03426|KIME_HUMAN	MVK	KIME_HUMAN Mevalonate kinase	13	5.62049	5.89681	5.82195	6.28151	6.10811	6.32506	6.45973	6.57102	6.61272	6.61067	6.98803	6.80491	6.22914	5.47848	6.10763	6.08374	5.90519	6.36598	6.75408	5.97475	1.07803	1.14375	1.01178	0.108399	0.193776	0.0168943	0.0468552	0.0312861	0.0267416	0.0563897
sp|O75319|DUS11_HUMAN	DUSP11	DUS11_HUMAN RNA/RNP complex-1-interacting phosphatase	2	5.43768	6.51829	6.49326	6.29082	6.33337	5.50965	6.63888	6.26025	6.50985	7.20184	7.42033	7.16084	5.74768	5.59592	5.84307	5.03826	6.18501	6.18554	7.07322	5.55623	1.00008	1.14361	0.898338	0.000122455	0.19359	-0.15467	0.0822188	0.0775206	0.0554864	0.064792
sp|Q8IZV5|RDH10_HUMAN	RDH10	RDH10_HUMAN Retinol dehydrogenase 10	3	5.68382	5.69505	5.82358	6.28717	6.69024	6.53694	6.50546	6.28872	6.48392	6.61501	6.71337	7.04954	6.25667	5.56158	6.10961	5.69932	5.8724	6.50534	6.71546	5.90679	1.10778	1.14356	1.00586	0.147673	0.193535	0.00842407	0.0483083	0.0254314	0.0359975	0.0557879
tr|F5GZQ4|F5GZQ4_HUMAN	LDHA	F5GZQ4_HUMAN L-lactate dehydrogenase A chain (Fragment)	1	4.20444	5.9512	6.15603	6.8374	7.55608	5.40969	6.06056	4.99501	5.62199	6.08788	8.38746	6.37282	5.93036	8.69564	5.60594	6.1275	5.78727	6.00533	6.61754	6.58986	1.03768	1.14346	1.13868	0.0533624	0.193412	0.187365	0.193728	0.187001	0.184337	0.215517
sp|Q8N1G2|CMTR1_HUMAN	CMTR1	CMTR1_HUMAN Cap-specific mRNA (nucleoside-2'-O-)-methyltransferase 1	17	5.08679	6.15502	5.8771	6.37511	6.47674	6.6539	6.97961	7.29811	6.54097	6.4621	7.08625	6.77333	5.67262	4.77244	6.11492	5.67499	5.8735	6.85209	6.71566	5.55874	1.16661	1.14338	0.94641	0.222322	0.193308	-0.0794631	0.0957979	0.0529802	0.0417177	0.101451
sp|Q5T4B2|GT253_HUMAN	CERCAM	GT253_HUMAN Probable inactive glycosyltransferase 25 family member 3	1	6.25876	5.70222	6.32736	6.06785	7.12106	6.68409	5.88976	6.66009	7.34529	6.7839	6.94838	6.76342	5.20724	5.93788	5.12474	5.17797	6.08905	6.58875	6.96025	5.36196	1.08207	1.14308	0.880591	0.113788	0.192922	-0.183457	0.0460311	0.0776928	0.0387507	0.0718887
sp|Q8TEQ8|PIGO_HUMAN	PIGO	PIGO_HUMAN GPI ethanolamine phosphate transferase 3	3	5.34318	6.46819	6.28805	6.19542	6.68066	6.19836	5.65751	6.71832	6.66237	7.09101	6.89195	7.12155	6.1487	5.8551	5.46547	5.21417	6.07371	6.31371	6.94172	5.67086	1.03951	1.14291	0.933673	0.0559105	0.192715	-0.0990105	0.0823244	0.0787833	0.0305748	0.0729223
sp|P41250|SYG_HUMAN	GARS	SYG_HUMAN Glycine--tRNA ligase	80	5.15207	6.03231	5.85905	6.09502	6.44651	6.58715	6.73092	7.15413	6.59856	6.39921	6.77713	6.66638	6.13408	5.18662	6.3572	5.82366	5.78461	6.72968	6.61032	5.87539	1.16338	1.14274	1.01569	0.218317	0.1925	0.0224643	0.074913	0.0454501	0.0240265	0.0865711
sp|Q9NX70|MED29_HUMAN	MED29	MED29_HUMAN Mediator of RNA polymerase II transcription subunit 29	4	5.82223	3.48528	4.72157	6.97152	5.45135	7.73122	8.16514	3.11383	3.25427	5.06114	7.56374	8.11908	6.4702	9.03148	7.26508	7.77287	5.25015	6.11538	5.99956	7.63491	1.1648	1.14274	1.45423	0.220085	0.192497	0.540252	0.284318	0.380725	0.377106	0.140717
sp|Q9Y2K2|SIK3_HUMAN	SIK3	SIK3_HUMAN Serine/threonine-protein kinase SIK3	1	5.46578	5.49	5.96237	6.7483	6.74127	6.85493	5.97764	6.62104	6.88342	6.35438	6.43433	7.37236	6.03892	5.50339	6.42338	5.12848	5.91661	6.54872	6.76112	5.77354	1.10684	1.14274	0.975819	0.146442	0.192491	-0.0353146	0.101365	0.0599376	0.0694154	0.0990852
sp|Q6NXG1-4|ESRP1_HUMAN	ESRP1	ESRP1_HUMAN Isoform 4 of Epithelial splicing regulatory protein 1	1	5.08153	6.3823	6.06827	5.98636	6.2601	6.60663	6.49809	7.53697	7.76827	6.20707	5.97485	6.92516	5.51847	5.58395	6.05427	5.54771	5.87962	6.72545	6.71884	5.6761	1.14386	1.14273	0.965386	0.193909	0.19249	-0.0508217	0.0950324	0.0832714	0.120281	0.0446666
sp|Q8N448|LNX2_HUMAN	LNX2	LNX2_HUMAN Ligand of Numb protein X 2	3	5.11302	6.00756	6.10857	6.16861	6.53784	6.03676	6.5183	6.71928	6.84739	6.13489	6.91232	6.83659	6.52743	5.10743	5.72324	6.70076	5.84944	6.45305	6.6828	6.01471	1.10319	1.14247	1.02825	0.141682	0.192154	0.0401979	0.0846959	0.045235	0.0548871	0.122989
sp|Q96RL7|VP13A_HUMAN	VPS13A	VP13A_HUMAN Vacuolar protein sorting-associated protein 13A	1	5.72836	4.52224	6.7508	5.4744	7.50326	5.21724	6.44723	7.2669	7.61347	5.79755	6.21986	6.0447	6.65956	6.30417	7.02313	5.42713	5.61895	6.60866	6.4189	6.3535	1.17614	1.14237	1.13073	0.234057	0.192024	0.17725	0.163005	0.156174	0.12697	0.107623
sp|Q5VYV7|SLX4I_HUMAN	SLX4IP	SLX4I_HUMAN Protein SLX4IP	1	5.80723	6.13381	6.12978	7.2486	4.56513	5.34227	6.15072	6.63761	5.86546	6.3127	7.53318	9.21127	5.168	4.81065	5.68021	7.40339	6.32986	5.67393	7.23065	5.76556	0.896376	1.14231	0.910852	-0.157823	0.191953	-0.134711	0.0997368	0.160742	0.207	0.199239
sp|Q9BPW8|NIPS1_HUMAN	NIPSNAP1	NIPS1_HUMAN Protein NipSnap homolog 1	19	4.59461	5.47327	6.52346	6.95383	6.15307	6.28039	7.09629	7.64425	6.23423	6.08843	7.40756	7.16414	5.2419	4.44171	6.68731	6.01555	5.88629	6.7935	6.72359	5.59662	1.15412	1.14225	0.950788	0.206796	0.191873	-0.0728041	0.180449	0.1037	0.0980867	0.173382
sp|Q9Y679|AUP1_HUMAN	AUP1	AUP1_HUMAN Ancient ubiquitous protein 1	4	5.7227	6.30159	5.90534	6.30967	5.94823	7.05017	6.74733	6.5911	7.02919	6.68125	7.04619	6.92886	5.67905	5.10357	5.63451	5.32126	6.05983	6.58421	6.92137	5.4346	1.08653	1.14217	0.896824	0.119734	0.191782	-0.157103	0.0484305	0.0706001	0.024308	0.0500716
sp|Q9UKZ1|CNO11_HUMAN	CNOT11	CNO11_HUMAN CCR4-NOT transcription complex subunit 11	2	5.23306	5.76383	5.69611	6.34426	6.07402	6.62199	6.41946	6.89597	6.42295	7.06688	6.70738	6.10677	6.42657	5.96306	6.31769	5.94	5.75932	6.50286	6.576	6.16183	1.1291	1.1418	1.06989	0.175177	0.191312	0.0974616	0.0791324	0.0532398	0.0621948	0.0400932
sp|Q13363|CTBP1_HUMAN	CTBP1	CTBP1_HUMAN C-terminal-binding protein 1	11	5.31521	5.94175	5.75612	6.29589	6.36833	6.5671	6.88441	6.75479	6.3473	6.34545	7.02198	6.88901	5.97188	5.40384	6.25383	5.88311	5.82724	6.64366	6.65093	5.87816	1.1401	1.14135	1.00874	0.189164	0.190744	0.0125525	0.070057	0.0338784	0.0535025	0.0601401
sp|Q9NX38|F206A_HUMAN	FAM206A	F206A_HUMAN Protein FAM206A	1	5.36727	6.07131	5.63784	6.7444	6.28148	6.45112	7.19596	6.53194	6.61864	6.27505	7.4705	6.82271	5.48358	5.26324	6.03999	5.74497	5.95521	6.61512	6.79673	5.63294	1.11081	1.14131	0.945886	0.151617	0.190689	-0.0802618	0.100878	0.0606251	0.0739809	0.0595203
sp|Q3MIN7-2|RGL3_HUMAN	RGL3	RGL3_HUMAN Isoform 2 of Ral guanine nucleotide dissociation stimulator-like 3	4	5.38536	5.92248	6.13622	6.0667	6.42808	6.70335	6.81351	6.86829	6.45093	6.84587	6.79879	6.73601	5.84782	5.66084	5.66464	5.6711	5.87769	6.70331	6.7079	5.7111	1.14047	1.14125	0.971657	0.189624	0.190612	-0.0414806	0.057859	0.0292223	0.0264055	0.0159768
sp|O43900|PRIC3_HUMAN	PRICKLE3	PRIC3_HUMAN Prickle-like protein 3	1	4.8327	5.37489	7.1033	6.34987	6.62156	6.11134	5.36746	5.76215	7.69331	7.40474	5.79073	6.11074	7.5878	6.28083	5.40777	6.2008	5.91519	5.96563	6.74988	6.3693	1.00853	1.14111	1.07677	0.0122494	0.190437	0.10671	0.170857	0.0892623	0.139172	0.141753
sp|Q96E35|ZMY19_HUMAN	ZMYND19	ZMY19_HUMAN Zinc finger MYND domain-containing protein 19	1	5.55708	6.105	5.12449	5.84873	9.75471	6.52153	5.62653	6.83449	6.5363	5.20018	6.1043	7.98672	4.66075	5.91979	5.50559	6.71381	5.65882	7.18431	6.45688	5.69998	1.26958	1.14103	1.00727	0.344348	0.190334	0.0104556	0.0743466	0.248933	0.179954	0.15003
sp|Q15070|OXA1L_HUMAN	OXA1L	OXA1L_HUMAN Mitochondrial inner membrane protein OXA1L	6	5.47503	6.32293	5.75867	6.04764	6.44761	7.35113	6.97846	6.57456	6.36841	7.2279	6.70696	6.6297	5.55329	5.22473	5.97742	5.35558	5.90107	6.83794	6.73324	5.52775	1.15876	1.14102	0.936738	0.212586	0.190325	-0.0942823	0.0619739	0.0599915	0.0534936	0.0594808
sp|Q3KQV9|UAP1L_HUMAN	UAP1L1	UAP1L_HUMAN UDP-N-acetylhexosamine pyrophosphorylase-like protein 1	14	4.88247	6.02806	6.20417	6.54597	5.8562	6.16306	6.9039	7.09508	6.61984	6.39431	7.17055	6.8121	6.12806	4.96763	6.32353	5.90506	5.91517	6.50456	6.7492	5.83107	1.09964	1.141	0.985783	0.137032	0.190297	-0.0206584	0.121934	0.0907438	0.0487052	0.102979
sp|A4D1E9|GTPBA_HUMAN	GTPBP10	GTPBA_HUMAN GTP-binding protein 10	15	5.57044	6.07442	5.82091	6.23209	6.67054	7.09603	6.52122	6.77285	7.18806	6.77173	6.54011	6.53891	6.15591	5.16621	5.46097	5.4196	5.92446	6.76516	6.7597	5.55067	1.1419	1.14098	0.936907	0.191439	0.190275	-0.0940223	0.0490346	0.0360051	0.0452438	0.0763887
sp|F8VTS6|RFAL1_HUMAN	RFPL4AL1	RFAL1_HUMAN Ret finger protein-like 4A-like protein 1	1	7.35795	3.83792	5.66552	7.46164	5.61205	6.42787	6.52402	7.39435	9.22352	6.09321	6.13405	6.30094	5.51569	6.27883	4.12997	6.04245	6.08076	6.48957	6.93793	5.49174	1.06723	1.14096	0.903133	0.0938724	0.190254	-0.146989	0.28071	0.112311	0.220004	0.175218
sp|Q14CZ7|FAKD3_HUMAN	FASTKD3	FAKD3_HUMAN FAST kinase domain-containing protein 3	4	5.37136	6.02747	6.49582	6.2668	6.81587	6.11046	5.86223	6.05714	7.2276	6.57172	7.02455	6.74047	6.12403	5.47848	6.0114	5.8146	6.04036	6.21143	6.89109	5.85713	1.02832	1.14084	0.969665	0.0402892	0.190096	-0.0444418	0.080337	0.06711	0.0423688	0.0483124
sp|Q8WU67|ABHD3_HUMAN	ABHD3	ABHD3_HUMAN Abhydrolase domain-containing protein 3	1	5.19917	5.96533	6.44919	6.43329	6.71062	6.82789	6.72165	6.81431	6.9329	6.76503	7.10473	6.63076	5.32347	5.13214	5.27783	5.71169	6.01174	6.76862	6.85835	5.36128	1.1259	1.14083	0.891801	0.171077	0.190079	-0.165206	0.0975375	0.00901528	0.0299724	0.0461539
sp|Q92539|LPIN2_HUMAN	LPIN2	LPIN2_HUMAN Phosphatidate phosphatase LPIN2	1	5.82123	5.82629	7.06901	5.66853	5.65685	5.0637	7.34874	5.20186	7.40749	6.92802	7.03771	6.44321	5.93473	6.11424	6.27533	6.20306	6.09626	5.81779	6.95411	6.13184	0.95432	1.14072	1.00584	-0.067455	0.18994	0.00839444	0.107052	0.18076	0.0571739	0.0239726
sp|Q504T8|MIDN_HUMAN	MIDN	MIDN_HUMAN Midnolin	1	4.1834	6.53777	6.75732	7.19509	5.42641	5.71553	6.22908	5.71553	6.8516	6.578	7.90436	6.80434	5.93922	6.14652	7.12214	4.8937	6.1684	5.77164	7.03458	6.02539	0.935679	1.14042	0.976817	-0.0959145	0.189568	-0.0338393	0.219059	0.0578747	0.0841591	0.151676
sp|Q9H4E7|DEFI6_HUMAN	DEF6	DEFI6_HUMAN Differentially expressed in FDCP 6 homolog	11	5.11927	5.87622	6.14382	6.43959	6.21278	6.49656	6.97103	7.35458	6.75925	6.5545	6.86754	6.7069	6.00502	5.13406	5.78266	5.57623	5.89473	6.75874	6.72205	5.62449	1.14657	1.14035	0.954157	0.197329	0.189476	-0.0677016	0.0959946	0.0748073	0.0193686	0.0659414
sp|Q9UHJ6|SHPK_HUMAN	SHPK	SHPK_HUMAN Sedoheptulokinase	8	5.38189	5.91386	5.74393	6.44546	6.35056	6.51639	6.72009	6.6867	6.78751	6.36563	6.92004	6.70636	6.05605	5.3642	6.10753	5.93379	5.87129	6.56843	6.69489	5.86539	1.11874	1.14028	0.998996	0.161873	0.189383	-0.00144864	0.0753538	0.0259505	0.0353274	0.0583049
sp|Q6ZS30|NBEL1_HUMAN	NBEAL1	NBEL1_HUMAN Neurobeachin-like protein 1	2	5.31516	5.29517	6.58857	6.95765	5.93513	6.33326	7.03548	6.18793	6.97638	6.28344	7.57343	6.70957	5.80357	4.84655	6.12769	6.03103	6.03914	6.37295	6.8857	5.70221	1.05527	1.14018	0.944209	0.0776188	0.189262	-0.0828213	0.142545	0.073957	0.0784294	0.102837
sp|P17980|PRS6A_HUMAN	PSMC3	PRS6A_HUMAN 26S protease regulatory subunit 6A	48	5.32287	6.06655	5.84527	6.23925	6.62841	6.7682	6.74519	6.99124	6.72988	6.71795	6.74817	6.56585	5.88694	5.21622	5.97445	5.55355	5.86848	6.78326	6.69046	5.65779	1.15588	1.14007	0.964097	0.208991	0.189118	-0.0527495	0.0677998	0.0223431	0.0125551	0.0611108
sp|Q96KB5|TOPK_HUMAN	PBK	TOPK_HUMAN Lymphokine-activated killer T-cell-originated protein kinase	30	5.03733	5.8846	6.03216	6.47351	6.28027	6.45619	6.906	7.02054	6.51874	6.39036	6.90033	6.89338	5.88971	5.15483	6.39247	5.76957	5.8569	6.66575	6.6757	5.80165	1.1381	1.1398	0.990566	0.18663	0.188782	-0.0136752	0.102604	0.0531185	0.0390526	0.0876764
sp|Q16850|CP51A_HUMAN	CYP51A1	CP51A_HUMAN Lanosterol 14-alpha demethylase	16	5.36381	6.18038	5.90614	6.40303	6.40305	6.83929	6.85911	7.0863	6.7109	6.48224	7.10867	6.88579	5.55436	4.86928	5.85574	5.49192	5.96334	6.79694	6.7969	5.44283	1.13979	1.13978	0.912714	0.188764	0.188756	-0.131765	0.0751899	0.0420048	0.0390654	0.0760719
sp|O15111|IKKA_HUMAN	CHUK	IKKA_HUMAN Inhibitor of nuclear factor kappa-B kinase subunit alpha	17	5.40464	6.14879	5.93033	6.50889	6.48964	6.95385	6.66573	6.89455	6.97425	6.8096	6.91418	6.64786	5.74525	5.00249	5.58628	5.32367	5.99816	6.75094	6.83647	5.41442	1.1255	1.13976	0.90268	0.170568	0.188732	-0.147713	0.0770278	0.0316931	0.0209123	0.0600278
sp|Q9NWX6|THG1_HUMAN	THG1L	THG1_HUMAN Probable tRNA(His) guanylyltransferase	15	5.29696	5.82041	5.9588	6.49052	6.32468	6.80852	7.05054	6.91999	6.50056	6.47627	7.05738	6.82463	5.69439	5.05294	6.01528	5.70812	5.89167	6.77593	6.71471	5.61768	1.15009	1.1397	0.953495	0.201742	0.188648	-0.0687021	0.0832597	0.0467355	0.0414344	0.0720209
sp|P32019|I5P2_HUMAN	INPP5B	I5P2_HUMAN Type II inositol 1,4,5-trisphosphate 5-phosphatase	7	5.23512	5.93688	6.04499	6.25746	6.66646	6.50673	6.4702	7.25954	6.49204	6.50106	6.88317	6.87399	5.77564	5.27393	6.00762	5.81514	5.86861	6.72573	6.68756	5.71808	1.14605	1.13955	0.97435	0.196672	0.188462	-0.037488	0.0754567	0.054408	0.0329907	0.0547321
sp|P08133|ANXA6_HUMAN	ANXA6	ANXA6_HUMAN Annexin A6	40	5.40312	5.98098	5.87683	6.25754	6.24234	6.48255	6.78052	7.10662	6.62187	6.38309	6.79007	7.00528	5.83782	5.03826	6.20008	5.99303	5.87962	6.65301	6.70008	5.7673	1.13154	1.13954	0.980897	0.178284	0.188455	-0.0278269	0.0605441	0.0562218	0.0392852	0.0881132
sp|P28328|PEX2_HUMAN	PEX2	PEX2_HUMAN Peroxisome biogenesis factor 2	1	5.87944	5.81194	6.06666	5.30593	8.10025	6.99136	6.33776	6.61349	7.07603	5.50263	6.65728	7.04505	5.47493	6.50171	5.57217	5.06337	5.76599	7.01072	6.57025	5.65304	1.21587	1.13948	0.980411	0.281993	0.188379	-0.0285408	0.0563796	0.11043	0.112142	0.107418
sp|Q9H160|ING2_HUMAN	ING2	ING2_HUMAN Inhibitor of growth protein 2	1	5.75238	7.02126	5.93959	5.38696	5.77315	7.02004	5.68906	7.81247	6.57424	7.12781	7.54175	6.21551	6.50639	6.08745	5.15005	4.40191	6.02505	6.57368	6.86483	5.53645	1.09106	1.13938	0.918906	0.125729	0.188251	-0.122011	0.116625	0.156057	0.0854972	0.170744
sp|A2VDF0|FUCM_HUMAN	FUOM	FUCM_HUMAN Fucose mutarotase	1	5.23436	4.70054	5.67959	6.6718	6.77824	6.27612	6.39924	7.68799	7.31405	6.09856	5.72545	6.25336	6.25505	7.08369	6.03863	5.80332	5.57157	6.7854	6.34786	6.29517	1.21786	1.13933	1.12987	0.284349	0.188185	0.176161	0.149972	0.0941052	0.107308	0.0884974
sp|A5PLN9-5|TPC13_HUMAN	TRAPPC13	TPC13_HUMAN Isoform 4 of Trafficking protein particle complex subunit 13	5	5.47107	6.55348	5.47644	6.15444	6.23034	6.57958	6.61949	6.63609	6.64715	6.3093	7.09772	6.89686	5.68941	5.5085	6.06717	6.06296	5.91386	6.51638	6.73776	5.83201	1.10188	1.13932	0.98616	0.13997	0.188169	-0.0201063	0.0902396	0.0294886	0.0504526	0.0478505
sp|Q9GZZ9|UBA5_HUMAN	UBA5	UBA5_HUMAN Ubiquitin-like modifier-activating enzyme 5	21	5.14503	5.61374	5.94432	6.71271	6.0944	6.279	6.74383	6.95641	6.29239	6.13133	7.1463	7.10174	6.00469	5.38979	6.63405	5.81028	5.85395	6.51841	6.66794	5.9597	1.11351	1.13905	1.01807	0.15511	0.187831	0.0258299	0.112706	0.0613493	0.0796402	0.086859
sp|P22314|UBA1_HUMAN	UBA1	UBA1_HUMAN Ubiquitin-like modifier-activating enzyme 1	110	5.1369	5.92313	5.97066	6.3242	6.28527	6.49301	6.79822	7.12277	6.56085	6.28601	6.99215	6.74718	5.89225	5.07869	6.45377	5.93494	5.83872	6.67482	6.64655	5.83991	1.1432	1.13836	1.0002	0.193076	0.186952	0.000294008	0.0857935	0.0547526	0.0448763	0.0972707
sp|Q03113|GNA12_HUMAN	GNA12	GNA12_HUMAN Guanine nucleotide-binding protein subunit alpha-12	4	5.58758	6.23817	5.91292	6.4379	6.34846	6.69443	6.62243	6.84576	6.78945	6.83833	6.95082	6.9427	5.94635	5.10797	5.28719	5.44952	6.04414	6.62777	6.88033	5.44776	1.09656	1.13835	0.901328	0.132986	0.186939	-0.149875	0.0617846	0.0314089	0.0115307	0.0661701
sp|O60701|UGDH_HUMAN	UGDH	UGDH_HUMAN UDP-glucose 6-dehydrogenase	33	5.29584	5.97287	5.69557	6.18944	6.57873	6.77316	6.55692	6.94628	6.55556	6.45432	6.68392	6.66218	6.07292	5.27332	6.47496	5.81399	5.78843	6.71377	6.58899	5.9088	1.15986	1.1383	1.02079	0.213952	0.186886	0.0296925	0.0666181	0.0272518	0.0160669	0.0851985
sp|P0DJD1|RGPD2_HUMAN	RGPD2	RGPD2_HUMAN RANBP2-like and GRIP domain-containing protein 2	1	4.15065	5.23872	7.04417	6.51421	6.51478	7.50793	7.3173	6.76331	6.42179	6.25751	7.2945	6.14118	5.30964	5.77786	5.22966	6.51678	5.73694	7.02583	6.52875	5.70849	1.22467	1.13802	0.99504	0.292388	0.186525	-0.00717289	0.22677	0.0661225	0.0801565	0.103464
sp|Q9Y4C2-2|F115A_HUMAN	FAM115A	F115A_HUMAN Isoform 2 of Protein FAM115A	1	6.14151	5.31138	5.63522	6.96238	5.69312	6.44057	6.49161	7.42648	6.82523	6.70544	7.79481	6.04411	5.84622	6.03696	4.98909	5.65588	6.01262	6.51295	6.8424	5.63204	1.08321	1.13801	0.936702	0.115316	0.186508	-0.0943374	0.119657	0.109016	0.105503	0.080964
sp|Q99836|MYD88_HUMAN	MYD88	MYD88_HUMAN Myeloid differentiation primary response protein MyD88	8	5.38854	5.81627	5.92599	6.60001	6.42182	6.41832	6.71815	6.68116	6.53621	6.26103	7.18746	7.02104	5.79437	5.61782	6.01193	5.59988	5.9327	6.55986	6.75143	5.756	1.10571	1.138	0.970216	0.144976	0.186505	-0.0436228	0.0845599	0.0247154	0.0633981	0.0333335
sp|Q8WYP5-2|ELYS_HUMAN	AHCTF1	ELYS_HUMAN Isoform 2 of Protein ELYS	8	5.30253	6.25372	6.03993	6.13031	6.5024	6.67115	6.44305	6.53053	6.96589	6.24955	6.90819	6.86695	6.0237	5.27215	5.91357	5.9264	5.93162	6.53678	6.74765	5.78396	1.10202	1.13757	0.975105	0.140154	0.185957	-0.0363705	0.0722317	0.0147956	0.0495778	0.0596008
sp|Q9UHH9|IP6K2_HUMAN	IP6K2	IP6K2_HUMAN Inositol hexakisphosphate kinase 2	1	5.58833	6.86589	5.31953	6.84067	5.97898	6.1034	6.01906	7.13394	6.34812	7.32556	7.53433	6.7901	5.23246	5.88749	5.32409	5.70805	6.1536	6.30884	6.99953	5.53802	1.02523	1.13747	0.899964	0.0359441	0.185826	-0.152061	0.132507	0.0875758	0.076515	0.0561581
sp|Q15361|TTF1_HUMAN	TTF1	TTF1_HUMAN Transcription termination factor 1	1	4.93009	6.56199	5.13084	6.73083	6.18423	5.27536	7.54215	5.90211	5.78419	4.97738	7.28783	8.51193	4.92638	9.10484	5.87555	5.27431	5.83844	6.22596	6.64033	6.29527	1.06637	1.13735	1.07825	0.0927146	0.185673	0.108686	0.160846	0.153573	0.236846	0.303981
sp|O60678|ANM3_HUMAN	PRMT3	ANM3_HUMAN Protein arginine N-methyltransferase 3	7	5.25377	5.9185	6.19408	6.7492	6.46752	6.52469	6.68665	6.71458	6.87007	6.42522	7.1537	6.9764	5.65646	5.544	5.56906	5.29612	6.02889	6.59836	6.85635	5.51641	1.09446	1.13725	0.914996	0.130216	0.185548	-0.128162	0.103102	0.0183223	0.0452598	0.0280199
sp|P33991|MCM4_HUMAN	MCM4	MCM4_HUMAN DNA replication licensing factor MCM4	50	5.34782	6.10006	5.88926	6.43464	6.51768	6.92314	6.78109	7.04525	6.88829	6.6399	6.99221	6.51261	5.72055	5.04729	5.80422	5.35599	5.94294	6.81679	6.75825	5.48201	1.14704	1.13719	0.92244	0.197915	0.185472	-0.116472	0.076711	0.0332633	0.0326416	0.0636784
sp|P23677|IP3KA_HUMAN	ITPKA	IP3KA_HUMAN Inositol-trisphosphate 3-kinase A	7	5.12504	6.08575	6.21771	6.07194	6.15931	6.4389	6.81572	6.73743	6.72587	6.26802	6.89864	6.83109	5.89434	5.472	6.45983	5.79841	5.87511	6.53784	6.68091	5.90615	1.1128	1.13715	1.00528	0.154198	0.185428	0.00760091	0.0858443	0.0458976	0.0425524	0.0695907
sp|Q6N069|NAA16_HUMAN	NAA16	NAA16_HUMAN N-alpha-acetyltransferase 16, NatA auxiliary subunit	14	5.50324	5.95029	5.72514	6.52633	6.58938	6.67985	7.07907	7.41932	6.92322	6.2442	7.04922	6.73739	5.71115	4.82356	5.75754	5.2811	5.92625	6.94191	6.73851	5.39334	1.17138	1.13706	0.910076	0.228212	0.18531	-0.135941	0.0741984	0.0551483	0.0524678	0.0808833
sp|Q5VTL8|PR38B_HUMAN	PRPF38B	PR38B_HUMAN Pre-mRNA-splicing factor 38B	1	5.44936	7.1465	4.8511	5.3243	7.05014	7.27596	6.10818	6.17501	6.18156	7.04077	6.88314	5.78555	6.40316	5.966	5.70905	6.65021	5.69282	6.65232	6.47276	6.18211	1.16855	1.137	1.08595	0.224716	0.185238	0.118956	0.17615	0.0898217	0.0913171	0.0685305
sp|Q9NP70|AMBN_HUMAN	AMBN	AMBN_HUMAN Ameloblastin	1	5.50535	6.83187	5.67273	6.13441	7.0291	6.72225	6.50116	6.84463	6.87861	6.5978	7.71157	6.26315	5.62179	4.97303	5.34299	5.36956	6.03609	6.77428	6.86278	5.32684	1.1223	1.13696	0.882499	0.166454	0.185179	-0.180334	0.0983216	0.0326969	0.0902352	0.0501699
sp|Q9BSE4|HERP2_HUMAN	HERPUD2	HERP2_HUMAN Homocysteine-responsive endoplasmic reticulum-resident ubiquitin-like domain member 2 protein	1	6.68454	5.18074	5.50422	5.87277	5.88435	6.88913	5.83671	5.60555	5.51193	6.77023	7.35183	6.78886	5.73808	8.13865	6.92851	5.31391	5.81057	6.05394	6.60571	6.52979	1.04188	1.13684	1.12378	0.0591941	0.185035	0.168357	0.111455	0.0941462	0.117706	0.194772
sp|Q7Z4H8|KDEL2_HUMAN	KDELC2	KDEL2_HUMAN KDEL motif-containing protein 2	11	5.181	6.06839	5.97055	6.14838	6.31341	6.94339	6.79631	6.91367	6.59024	6.38775	6.95681	6.6262	5.63372	5.29748	6.51239	5.66032	5.84208	6.74169	6.64025	5.77598	1.15399	1.13662	0.988685	0.206629	0.184755	-0.016417	0.076459	0.0433866	0.0354958	0.0896765
sp|Q7Z2E3|APTX_HUMAN	APTX	APTX_HUMAN Aprataxin	2	5.51909	5.67377	6.2768	6.01722	6.56671	6.66872	6.39439	6.46818	7.03826	6.65241	6.56943	6.42648	6.33211	5.93441	5.48379	5.97822	5.87172	6.5245	6.67164	5.93213	1.11117	1.13623	1.01029	0.152084	0.184259	0.0147676	0.0580707	0.0182815	0.0392133	0.0586482
sp|Q9UHY8-2|FEZ2_HUMAN	FEZ2	FEZ2_HUMAN Isoform 2 of Fasciculation and elongation protein zeta-2	2	5.34798	6.33751	5.9188	6.44503	6.18774	6.41589	7.01794	6.62458	7.07607	6.06728	6.70234	7.4787	6.15456	5.43056	4.92262	5.87241	6.01233	6.56154	6.8311	5.59504	1.09135	1.13618	0.930594	0.12611	0.184193	-0.103776	0.0827779	0.0537543	0.0878091	0.0962046
tr|E7ESK7|E7ESK7_HUMAN	YWHAZ	E7ESK7_HUMAN 14-3-3 protein zeta/delta (Fragment)	1	5.50782	5.3738	6.06277	6.12222	6.55509	5.13942	5.89791	7.32424	6.1598	5.38729	8.07021	6.5874	6.06005	7.11432	6.11069	6.52696	5.76665	6.22917	6.55117	6.45301	1.0802	1.13604	1.11902	0.111305	0.18402	0.162237	0.0660664	0.149527	0.17217	0.075622
sp|Q5TC84|OGRL1_HUMAN	OGFRL1	OGRL1_HUMAN Opioid growth factor receptor-like protein 1	2	5.53685	5.76035	5.63058	6.96568	6.36313	6.04989	6.60725	6.81213	6.14078	6.41234	7.02149	7.56843	4.92974	5.93862	6.18429	6.07845	5.97336	6.4581	6.78576	5.78277	1.08115	1.136	0.968093	0.112566	0.183967	-0.0467819	0.111806	0.0508271	0.0941147	0.0998693
sp|Q15526|SURF1_HUMAN	SURF1	SURF1_HUMAN Surfeit locus protein 1	7	5.41028	6.21133	5.86513	6.17536	6.20806	6.8891	6.95463	6.74153	6.59024	6.59647	6.85659	6.83637	5.60908	5.62469	5.62668	5.80449	5.91553	6.69833	6.71992	5.66624	1.13233	1.13598	0.957858	0.179295	0.183937	-0.0621158	0.062709	0.0505766	0.0217855	0.0163257
sp|Q8TCT7|SPP2B_HUMAN	SPPL2B	SPP2B_HUMAN Signal peptide peptidase-like 2B	2	5.51494	5.8022	6.30474	5.72569	6.21047	5.80203	6.91736	5.82598	6.03385	6.73594	6.60989	7.14101	6.72636	6.5166	6.18942	5.94352	5.83689	6.18896	6.63017	6.34398	1.06032	1.13591	1.08688	0.0844965	0.183846	0.120187	0.0573449	0.0840878	0.0690156	0.054625
sp|Q9P107|GMIP_HUMAN	GMIP	GMIP_HUMAN GEM-interacting protein	3	5.47287	6.00456	5.75647	6.81405	6.22058	6.22975	6.33972	6.65928	7.35108	6.22513	7.01658	6.71511	5.70897	6.24306	5.77925	5.46352	6.01199	6.36233	6.82698	5.7987	1.05827	1.13556	0.964523	0.0817138	0.183404	-0.0521125	0.0959994	0.0322574	0.070012	0.0561669
sp|P51580|TPMT_HUMAN	TPMT	TPMT_HUMAN Thiopurine S-methyltransferase	17	4.93011	5.94696	6.24548	6.32736	6.21312	6.61609	6.80256	7.0531	6.38949	6.42038	6.98132	6.83692	5.60242	5.00193	6.5648	6.06796	5.86248	6.67122	6.65703	5.80928	1.13795	1.13553	0.990925	0.18644	0.183368	-0.0131517	0.109632	0.0530659	0.0446548	0.114716
sp|Q9H6E5|STPAP_HUMAN	TUT1	STPAP_HUMAN Speckle targeted PIP5K1A-regulated poly(A) polymerase	4	5.20746	6.56119	5.884	5.97102	6.26099	6.15291	6.91191	7.02689	6.60271	6.34438	6.62161	7.25267	6.10168	5.4602	6.10015	5.54022	5.90592	6.58817	6.70534	5.80056	1.11552	1.13536	0.982161	0.157718	0.18315	-0.0259684	0.0938651	0.0675285	0.0575929	0.060055
sp|Q15800|MSMO1_HUMAN	MSMO1	MSMO1_HUMAN Methylsterol monooxygenase 1	1	5.01899	6.3226	6.57037	6.33596	5.98186	6.48756	7.06659	6.51678	6.93223	6.63521	7.04863	6.90893	5.5001	5.17545	5.84015	5.65857	6.06198	6.5132	6.88125	5.54357	1.07443	1.13515	0.914481	0.103577	0.182882	-0.128974	0.116228	0.0680438	0.0254372	0.0508713
sp|Q9NRW7|VPS45_HUMAN	VPS45	VPS45_HUMAN Vacuolar protein sorting-associated protein 45	14	5.35246	5.90386	6.10737	6.53297	6.22679	6.88568	6.69265	6.86093	6.73438	6.6404	7.05084	6.69847	5.6867	5.24383	5.70956	5.6731	5.97416	6.66651	6.78102	5.5783	1.11589	1.13506	0.933737	0.158195	0.182766	-0.0989122	0.0820862	0.0458163	0.0271344	0.0400633
sp|Q6P6B7|ANR16_HUMAN	ANKRD16	ANR16_HUMAN Ankyrin repeat domain-containing protein 16	1	5.24937	5.90584	6.64213	5.81899	6.10582	6.40106	6.82406	6.81498	6.28232	7.28445	7.14395	6.09473	5.94972	5.93781	6.06238	5.48239	5.90408	6.53648	6.70136	5.85807	1.10711	1.13504	0.992208	0.146801	0.182742	-0.0112862	0.0968354	0.0532953	0.0895122	0.0438145
tr|C9J338|C9J338_HUMAN	TNIK	C9J338_HUMAN TRAF2 and NCK-interacting protein kinase (Fragment)	1	6.14847	5.72829	5.71474	5.71948	6.03557	6.34032	5.93321	5.7684	6.99585	6.51333	6.32041	6.62925	6.26145	6.13059	7.56904	6.19161	5.82775	6.01938	6.61471	6.53817	1.03288	1.13504	1.1219	0.0466759	0.18274	0.16595	0.0367021	0.0399727	0.0429702	0.10543
sp|P21283|VATC1_HUMAN	ATP6V1C1	VATC1_HUMAN V-type proton ATPase subunit C 1	20	5.36235	6.06036	5.85286	6.36731	6.48643	6.46201	6.71592	7.06591	6.81286	6.4955	6.92495	6.60206	5.85335	5.1323	6.1978	5.60803	5.91072	6.68257	6.70884	5.69787	1.13058	1.13503	0.963989	0.177069	0.18273	-0.0529112	0.0714406	0.0418982	0.0291125	0.0786215
sp|Q9BV79|MECR_HUMAN	MECR	MECR_HUMAN Trans-2-enoyl-CoA reductase, mitochondrial	4	4.90961	5.81906	6.04667	6.21831	6.28654	6.36412	6.54417	7.11644	6.27759	6.23383	6.71145	6.87437	6.06894	5.40583	7.01492	6.10814	5.74841	6.57782	6.52431	6.14946	1.14428	1.13498	1.06977	0.194445	0.182662	0.0972956	0.101353	0.0570017	0.0486958	0.107466
sp|Q9NQG6|MID51_HUMAN	MIEF1	MID51_HUMAN Mitochondrial dynamics protein MID51	4	5.0382	5.70434	6.06153	6.55309	6.48675	6.35465	6.80739	7.11224	6.43278	6.17497	7.05872	6.83689	5.79352	5.08134	6.45365	6.04993	5.83929	6.69026	6.62584	5.84461	1.14573	1.1347	1.00091	0.196269	0.18231	0.0013138	0.109158	0.0507496	0.0598951	0.0986982
sp|P98173|FAM3A_HUMAN	FAM3A	FAM3A_HUMAN Protein FAM3A	1	4.16943	6.91361	7.47005	6.01611	4.7912	5.93884	6.85899	6.25273	7.15754	6.7324	7.1565	6.83216	5.79498	5.92236	5.57013	6.42298	6.1423	5.96044	6.96965	5.92761	0.970392	1.1347	0.965048	-0.0433601	0.182307	-0.0513278	0.23529	0.145631	0.0315879	0.0608888
sp|O75635|SPB7_HUMAN	SERPINB7	SPB7_HUMAN Serpin B7	1	6.02464	5.3512	5.97361	6.00143	7.29314	5.2512	5.14718	6.54326	7.64313	6.2073	6.78179	5.86017	6.81572	6.79783	6.91131	5.3971	5.83772	6.0587	6.6231	6.48049	1.03785	1.13453	1.11011	0.0536021	0.182101	0.150698	0.0556753	0.171569	0.117621	0.111716
sp|Q9P209|CEP72_HUMAN	CEP72	CEP72_HUMAN Centrosomal protein of 72 kDa	2	5.53828	5.77688	6.43331	5.75413	6.38056	6.51472	7.18158	7.80669	6.50528	6.33279	7.57014	6.25504	5.56981	5.33108	5.43365	5.61606	5.87565	6.97089	6.66581	5.48765	1.1864	1.13448	0.933965	0.246594	0.182032	-0.09856	0.0658664	0.0944158	0.0917948	0.0236824
sp|P24468|COT2_HUMAN	NR2F2	COT2_HUMAN COUP transcription factor 2	1	6.70223	6.00127	5.07416	6.79422	5.30696	5.70093	6.66486	5.71067	6.32655	6.33546	7.22517	7.98274	5.59102	5.72171	6.3382	6.52385	6.14297	5.84586	6.96748	6.04369	0.951633	1.13422	0.983839	-0.0715223	0.181701	-0.0235055	0.129527	0.0987848	0.114442	0.0755752
sp|P33992|MCM5_HUMAN	MCM5	MCM5_HUMAN DNA replication licensing factor MCM5	46	5.16728	6.17766	5.85423	5.89991	6.5628	7.04459	6.83656	7.01176	6.55898	6.65784	6.39745	6.58189	6.01017	5.20432	6.32493	5.70963	5.77477	6.86393	6.54904	5.81226	1.18861	1.13408	1.00649	0.249271	0.18152	0.00933637	0.0743704	0.032131	0.0167256	0.08204
sp|Q92574|TSC1_HUMAN	TSC1	TSC1_HUMAN Hamartin	3	6.1495	5.63222	5.62461	7.46374	5.82308	6.08027	6.25502	6.52929	7.35959	7.05615	6.91528	6.87301	5.38583	6.36333	5.56852	4.92055	6.21752	6.17191	7.05101	5.55956	0.992665	1.13406	0.894176	-0.0106205	0.181491	-0.161369	0.139344	0.0481286	0.0312178	0.108154
sp|P50995|ANX11_HUMAN	ANXA11	ANX11_HUMAN Annexin A11	29	5.29275	6.01561	5.85369	6.22925	6.48239	6.79655	6.74638	7.04005	6.5694	6.33026	6.99908	6.628	5.76711	5.07243	6.44419	5.73285	5.84783	6.76634	6.63169	5.75414	1.15707	1.13404	0.98398	0.210476	0.181475	-0.0232986	0.0685282	0.0337937	0.0417276	0.0973583
sp|O94819|KBTBB_HUMAN	KBTBD11	KBTBB_HUMAN Kelch repeat and BTB domain-containing protein 11	3	5.31572	4.90066	5.59889	6.55395	6.15455	6.44775	7.43245	5.85634	5.86181	5.74925	6.71559	7.04001	6.73357	6.15227	6.7023	6.78489	5.59231	6.47277	6.34166	6.59326	1.15744	1.134	1.17899	0.210941	0.181419	0.237548	0.125583	0.105647	0.100092	0.0448878
sp|Q8N960|CE120_HUMAN	CEP120	CE120_HUMAN Centrosomal protein of 120 kDa	2	5.8175	5.5481	5.99021	5.81505	6.37784	6.23968	6.82739	6.96497	6.31888	5.96955	7.3035	6.6824	6.56706	5.88919	5.86921	5.81945	5.79272	6.60247	6.56858	6.03623	1.13979	1.13394	1.04204	0.188766	0.181342	0.0594075	0.0315106	0.0527625	0.0867567	0.0588283
sp|Q86VN1|VPS36_HUMAN	VPS36	VPS36_HUMAN Vacuolar protein-sorting-associated protein 36	13	5.33973	5.9693	6.10481	6.35677	6.29908	6.85695	6.90034	6.83242	6.68603	6.46043	7.03325	6.77159	5.68832	5.03016	6.01339	5.65742	5.94265	6.7222	6.73782	5.59732	1.13118	1.13381	0.94189	0.177826	0.181176	-0.0863701	0.0728337	0.0421697	0.0351265	0.0734218
sp|Q969S0|S35B4_HUMAN	SLC35B4	S35B4_HUMAN UDP-xylose and UDP-N-acetylglucosamine transporter	1	5.14827	5.22356	6.70602	5.97922	6.84312	6.40408	6.41421	7.07644	6.52569	5.70145	7.03391	6.87962	6.61794	4.51956	6.51027	6.41663	5.76427	6.68446	6.53517	6.0161	1.15964	1.13374	1.04369	0.213674	0.181087	0.0616913	0.126888	0.0496522	0.0910669	0.1664
sp|Q8TBC4|UBA3_HUMAN	UBA3	UBA3_HUMAN NEDD8-activating enzyme E1 catalytic subunit	27	5.27219	5.64985	6.00266	6.37076	6.30044	6.16288	6.63905	6.9152	6.4612	6.20248	7.09856	6.64645	6.20962	5.44474	6.53736	6.08656	5.82386	6.50439	6.60217	6.06957	1.11685	1.13364	1.04219	0.159437	0.180964	0.0596174	0.0808842	0.0521458	0.0572095	0.0754494
sp|Q9BXW7|CECR5_HUMAN	CECR5	CECR5_HUMAN Cat eye syndrome critical region protein 5	18	5.32975	6.26422	6.09944	6.27653	6.25909	6.57476	7.01208	7.07499	6.76633	6.56659	7.11902	6.71588	5.63924	4.6163	5.99751	5.68827	5.99249	6.73023	6.79195	5.48533	1.12311	1.13341	0.915368	0.167501	0.180673	-0.127576	0.0749504	0.0571896	0.0344459	0.109505
sp|Q8N6T7|SIR6_HUMAN	SIRT6	SIR6_HUMAN NAD-dependent protein deacetylase sirtuin-6	9	5.03577	6.08661	6.04475	6.32314	6.14703	6.28496	6.94168	7.17933	6.77613	6.50038	6.83606	6.50326	5.78882	5.29808	6.38615	5.86785	5.87257	6.63825	6.65396	5.83523	1.13038	1.13306	0.993641	0.176812	0.180221	-0.00920311	0.0972608	0.0753687	0.0266567	0.0763371
sp|Q6PEV8|F199X_HUMAN	FAM199X	F199X_HUMAN Protein FAM199X	1	6.48983	6.44108	6.37871	5.4343	5.30636	7.15326	6.14435	5.31484	6.61047	7.1791	7.89934	6.34641	5.56006	6.35626	6.4178	4.96782	6.18598	5.9797	7.00883	5.82548	0.966654	1.13302	0.941724	-0.0489285	0.180171	-0.086624	0.0813419	0.146421	0.0981432	0.118871
sp|O15438-4|MRP3_HUMAN	ABCC3	MRP3_HUMAN Isoform 4 of Canalicular multispecific organic anion transporter 2	2	5.97458	5.54056	5.87394	6.41167	6.57175	6.30342	6.58751	6.57837	6.4255	7.03162	6.86203	6.64052	5.85431	5.69836	5.73239	5.91348	5.95019	6.51026	6.73992	5.79963	1.09413	1.13272	0.974698	0.129781	0.179796	-0.036973	0.0603753	0.0212044	0.039137	0.0174506
sp|Q07866-9|KLC1_HUMAN	KLC1	KLC1_HUMAN Isoform I of Kinesin light chain 1	43	5.1194	6.0575	5.93935	5.98054	6.49832	7.19122	7.02471	6.80775	6.30193	6.75338	6.76824	6.33805	5.76524	5.08136	6.49942	5.87361	5.7742	6.8805	6.5404	5.80491	1.19159	1.13269	1.00532	0.252893	0.179758	0.00765262	0.0760745	0.0434962	0.0389894	0.100062
sp|Q08AF3|SLFN5_HUMAN	SLFN5	SLFN5_HUMAN Schlafen family member 5	4	5.14329	6.20152	5.87311	6.51498	6.63369	6.60798	6.36387	6.89891	6.96337	7.11642	6.25371	6.54782	5.83548	5.80363	5.52206	5.72017	5.93323	6.62611	6.72033	5.72033	1.11678	1.13266	0.964119	0.159346	0.179716	-0.0527169	0.0991412	0.0330158	0.0584857	0.0246213
sp|Q04446|GLGB_HUMAN	GBE1	GLGB_HUMAN 1,4-alpha-glucan-branching enzyme	16	5.51495	5.9199	5.95193	6.56198	6.4776	6.7483	6.99839	7.19953	6.68643	6.40853	7.1515	6.8785	5.59171	4.91256	5.63992	5.35825	5.98719	6.85595	6.78124	5.37561	1.1451	1.13262	0.897852	0.195479	0.17967	-0.155451	0.0721085	0.045589	0.0461997	0.0618168
sp|Q8N8R3|MCATL_HUMAN	SLC25A29	MCATL_HUMAN Mitochondrial carnitine/acylcarnitine carrier protein CACL	2	5.20486	6.77253	5.46759	6.24168	6.37864	6.72647	6.26559	6.15083	6.75568	6.47174	6.4347	7.16495	5.80375	5.93171	6.58638	5.64291	5.92166	6.38038	6.70677	5.99119	1.07746	1.13258	1.01174	0.10764	0.179615	0.0168391	0.121242	0.038989	0.0503123	0.0691038
sp|Q9NVI7-2|ATD3A_HUMAN	ATAD3A	ATD3A_HUMAN Isoform 2 of ATPase family AAA domain-containing protein 3A	9	5.15382	6.32508	6.03529	6.8112	6.6549	7.01432	6.57828	7.31208	6.75543	7.11011	6.62909	7.05255	5.63473	4.78615	4.88509	5.26188	6.08135	6.88989	6.8868	5.14196	1.13296	1.13245	0.84553	0.180091	0.179442	-0.242072	0.114498	0.0492941	0.0336397	0.0753032
sp|O60858-3|TRI13_HUMAN	TRIM13	TRI13_HUMAN Isoform 3 of E3 ubiquitin-protein ligase TRIM13	2	4.53414	6.2801	6.2898	5.75078	6.54186	6.72083	6.00172	6.22798	6.31342	5.99928	5.99665	7.57069	6.39098	5.42185	7.66579	6.29414	5.7137	6.3731	6.47001	6.44319	1.11541	1.13237	1.12767	0.157568	0.179341	0.173349	0.144516	0.0503073	0.115719	0.143449
sp|Q9Y4B4|ARIP4_HUMAN	RAD54L2	ARIP4_HUMAN Helicase ARIP4	4	5.38132	6.18028	5.9439	5.94041	6.73265	6.45151	7.25334	6.73513	6.26789	5.96497	7.63334	6.6807	5.86938	5.49897	6.22677	5.23945	5.86148	6.79316	6.63673	5.70864	1.15895	1.13226	0.973926	0.212818	0.179207	-0.0381167	0.0578727	0.0492296	0.109434	0.075575
sp|P08559-4|ODPA_HUMAN	PDHA1	ODPA_HUMAN Isoform 4 of Pyruvate dehydrogenase E1 component subunit alpha, somatic form, mitochondrial	25	5.41076	6.13164	5.95563	6.14534	6.43715	6.56891	6.73199	7.07826	6.73963	6.43701	6.85574	6.73422	5.92207	5.20602	5.97057	5.67506	5.91084	6.70408	6.69165	5.69343	1.1342	1.1321	0.963218	0.181675	0.178998	-0.0540657	0.0582654	0.0413294	0.0267161	0.0614316
tr|M0R054|M0R054_HUMAN	SAE1	M0R054_HUMAN SUMO-activating enzyme subunit 1 (Fragment)	1	5.5483	5.19571	6.80368	6.1467	6.5577	6.39064	7.01104	7.55752	6.44571	6.045	8.00832	6.32495	5.56454	5.33885	5.18952	5.87184	5.9236	6.87922	6.70599	5.49119	1.16133	1.13208	0.927002	0.215772	0.178978	-0.109355	0.119172	0.0759781	0.131866	0.0540723
sp|Q8WVM8|SCFD1_HUMAN	SCFD1	SCFD1_HUMAN Sec1 family domain-containing protein 1	26	5.2848	5.8396	5.89871	6.39316	6.43251	6.76897	6.63647	6.91322	6.76831	6.35653	6.78234	6.59737	6.15367	5.27578	6.02022	5.87835	5.85407	6.68779	6.62614	5.832	1.14242	1.13189	0.996231	0.192091	0.178729	-0.00544742	0.0774613	0.0305476	0.0299471	0.0664406
sp|Q14697-2|GANAB_HUMAN	GANAB	GANAB_HUMAN Isoform 2 of Neutral alpha-glucosidase AB	119	5.06312	5.86492	5.81392	6.30409	6.22384	6.39869	6.70017	6.8951	6.33191	6.2902	6.71714	6.74216	6.20167	5.43592	6.77393	6.2432	5.76151	6.55445	6.52035	6.16368	1.13763	1.13171	1.0698	0.186027	0.178502	0.0973444	0.089381	0.0458416	0.0371898	0.0893457
sp|Q8TEL6|TP4AP_HUMAN	TRPC4AP	TP4AP_HUMAN Short transient receptor potential channel 4-associated protein	3	5.42136	6.0409	5.96957	7.13713	6.25046	6.70367	6.35988	6.89115	7.07056	6.94133	6.68909	7.10333	5.9519	4.36396	5.72411	5.3816	6.14224	6.55129	6.95108	5.35539	1.0666	1.13168	0.871896	0.0930141	0.178472	-0.197773	0.117008	0.0454402	0.0270662	0.130949
sp|P49593|PPM1F_HUMAN	PPM1F	PPM1F_HUMAN Protein phosphatase 1F	6	5.17171	5.94466	5.83825	6.5321	6.25614	6.21612	6.66678	7.24256	6.36649	6.18056	6.81237	7.21671	6.02191	4.94502	6.6873	5.90133	5.87168	6.5954	6.64403	5.88889	1.12326	1.13154	1.00293	0.167687	0.178286	0.00422238	0.0949543	0.0723377	0.0699584	0.12191
sp|Q8IWV8-4|UBR2_HUMAN	UBR2	UBR2_HUMAN Isoform 4 of E3 ubiquitin-protein ligase UBR2	29	5.22162	5.74184	5.98378	6.45353	6.33741	6.8033	6.56508	6.85603	6.60707	6.4341	6.69003	6.74643	5.93701	5.59032	6.13175	5.90072	5.85019	6.64046	6.61941	5.88995	1.13508	1.13149	1.0068	0.182798	0.178218	0.00977129	0.0876449	0.0359017	0.0205688	0.0380369
sp|O75534|CSDE1_HUMAN	CSDE1	CSDE1_HUMAN Cold shock domain-containing protein E1	1	5.23	5.94759	5.60412	6.9707	6.5198	6.34146	6.39414	6.25642	5.8022	7.44785	7.35489	6.26991	5.80891	5.27123	6.45635	6.32444	5.9381	6.37796	6.71871	5.96523	1.07407	1.13146	1.00457	0.103092	0.178183	0.00657637	0.125996	0.0172907	0.120849	0.0906023
sp|Q9BSJ2-4|GCP2_HUMAN	TUBGCP2	GCP2_HUMAN Isoform 3 of Gamma-tubulin complex component 2	14	5.19142	6.21947	5.93459	6.65757	6.23992	6.91075	6.66173	6.76354	6.60309	6.64455	6.84758	7.06221	5.64044	5.20323	5.75199	5.66794	6.00076	6.64398	6.78936	5.5659	1.10719	1.13142	0.927532	0.146903	0.178129	-0.108531	0.102666	0.0433656	0.0310711	0.0442682
sp|Q6UX07|DHR13_HUMAN	DHRS13	DHR13_HUMAN Dehydrogenase/reductase SDR family member 13	1	5.36384	6.56032	5.75714	6.23835	6.26072	6.07513	6.45261	6.27077	6.49785	6.4336	7.09318	7.03667	6.25076	5.68427	6.13286	5.89193	5.97991	6.26481	6.76533	5.98996	1.04764	1.13134	1.00168	0.0671458	0.178035	0.00242079	0.0881098	0.0246079	0.0513955	0.0421786
sp|Q5T5X7|BEND3_HUMAN	BEND3	BEND3_HUMAN BEN domain-containing protein 3	2	4.53546	5.65345	5.57571	6.84231	6.20077	6.95694	7.53555	6.88222	6.6832	6.14622	6.60933	6.12361	5.55281	6.99405	5.58765	6.12073	5.65173	6.89387	6.39059	6.06381	1.21978	1.13073	1.07291	0.286621	0.177256	0.101531	0.166901	0.0792852	0.0464602	0.11089
sp|P32780|TF2H1_HUMAN	GTF2H1	TF2H1_HUMAN General transcription factor IIH subunit 1	9	5.29551	5.82865	5.7451	6.54617	6.13538	6.96007	6.50232	6.83479	6.50885	6.37142	6.65008	6.94467	5.69237	5.77259	6.62155	5.59049	5.85386	6.60814	6.61876	5.91925	1.12885	1.13067	1.01117	0.174857	0.177172	0.0160268	0.0884084	0.0559387	0.0370551	0.0800934
sp|Q96A29|FUCT1_HUMAN	SLC35C1	FUCT1_HUMAN GDP-fucose transporter 1	2	5.32029	5.59638	6.22609	6.30245	6.22369	6.74048	6.96411	6.81994	6.76912	6.67784	7.01215	6.04926	5.84079	6.12139	5.72015	5.61587	5.8613	6.68705	6.62709	5.82455	1.14088	1.13065	0.99373	0.19015	0.177155	-0.0090747	0.0818551	0.0482245	0.0619045	0.0374609
sp|P04818|TYSY_HUMAN	TYMS	TYSY_HUMAN Thymidylate synthase	11	5.23537	6.01617	5.84499	6.41062	6.39498	6.77133	6.6957	7.08007	6.39781	6.34168	6.95248	6.88638	5.79864	5.03682	6.33076	5.80618	5.87679	6.73552	6.64459	5.7431	1.14612	1.13065	0.977252	0.196762	0.177152	-0.0331981	0.0831779	0.0417778	0.0480586	0.0927511
sp|Q9Y6M9|NDUB9_HUMAN	NDUFB9	NDUB9_HUMAN NADH dehydrogenase [ubiquinone] 1 beta subcomplex subunit 9	16	4.96861	6.11632	5.95255	6.60085	6.27891	6.20105	6.41403	6.8319	6.41686	6.14003	7.24736	6.92176	5.98584	5.20556	6.727	5.99138	5.90958	6.43147	6.6815	5.97744	1.08831	1.13062	1.01148	0.122093	0.177116	0.0164727	0.115921	0.0437037	0.0743905	0.103935
sp|Q14353|GAMT_HUMAN	GAMT	GAMT_HUMAN Guanidinoacetate N-methyltransferase	7	5.39328	5.32453	6.12739	6.41451	6.46623	7.00515	6.48675	6.34923	5.61039	6.40946	7.41349	6.8639	5.85133	5.53622	6.41584	6.3323	5.81493	6.57684	6.57431	6.03392	1.13103	1.13059	1.03766	0.177633	0.177078	0.053335	0.0928967	0.0443821	0.115988	0.0687287
sp|Q92551|IP6K1_HUMAN	IP6K1	IP6K1_HUMAN Inositol hexakisphosphate kinase 1	6	4.90829	6.33676	6.09408	6.21869	6.71847	6.78939	6.8505	7.09767	6.99103	6.58383	6.604	6.45486	5.78243	5.08058	5.82441	5.66501	5.88945	6.86401	6.65843	5.58811	1.16547	1.13057	0.948833	0.220917	0.177048	-0.0757744	0.112332	0.024017	0.0347479	0.0617403
sp|P51946|CCNH_HUMAN	CCNH	CCNH_HUMAN Cyclin-H	5	5.16303	5.76141	6.0814	6.12715	6.13678	6.35383	6.47022	6.75982	6.64709	6.29476	6.70998	6.49833	6.09937	5.56485	6.80708	6.5249	5.78325	6.43016	6.53754	6.24905	1.11186	1.13043	1.08054	0.152975	0.176868	0.111757	0.076832	0.0403724	0.0282348	0.0865722
sp|Q13418|ILK_HUMAN	ILK	ILK_HUMAN Integrin-linked protein kinase	16	5.14461	6.15678	5.80945	6.47247	6.33848	6.8175	6.70986	7.22348	6.69289	6.48616	6.83365	6.64467	5.84601	5.07609	6.01986	5.72804	5.89583	6.77233	6.66434	5.6675	1.14866	1.13035	0.961273	0.199958	0.176768	-0.0569818	0.0965645	0.0537628	0.0215045	0.0727111
sp|P49736|MCM2_HUMAN	MCM2	MCM2_HUMAN DNA replication licensing factor MCM2	74	5.22987	6.05947	5.96763	6.24131	6.39463	6.70543	6.87989	6.92689	6.50754	6.59732	6.83129	6.62162	5.94985	5.15859	6.17707	5.7516	5.87457	6.72671	6.63944	5.75928	1.14506	1.1302	0.980374	0.195418	0.176579	-0.0285954	0.0756807	0.0358297	0.0206322	0.0758011
sp|O00231|PSD11_HUMAN	PSMD11	PSD11_HUMAN 26S proteasome non-ATPase regulatory subunit 11	61	5.29689	6.0711	5.59362	6.23261	6.5287	6.9365	6.61827	6.73114	6.56916	6.45555	6.59903	6.58826	6.0657	5.49007	6.44005	5.78336	5.79856	6.70365	6.553	5.94479	1.15609	1.13011	1.02522	0.209254	0.176462	0.0359336	0.0742667	0.0262464	0.0100916	0.0681723
sp|Q9NPB8|GPCP1_HUMAN	GPCPD1	GPCP1_HUMAN Glycerophosphocholine phosphodiesterase GPCPD1	4	4.89692	6.41295	6.34519	6.09396	6.15964	6.44284	6.91767	7.50595	6.6177	6.43607	6.87545	6.90938	5.90346	5.41145	5.33169	5.73969	5.93725	6.75652	6.70965	5.59657	1.13799	1.13009	0.94262	0.186485	0.176441	-0.0852525	0.119079	0.0872383	0.0334019	0.0482874
sp|O75648|MTU1_HUMAN	TRMU	MTU1_HUMAN Mitochondrial tRNA-specific 2-thiouridylase 1	15	5.32333	5.97476	5.70229	6.27586	6.498	6.59305	6.58364	6.77493	6.57096	6.25467	6.68038	6.79797	6.08599	5.57505	6.33616	5.97296	5.81906	6.6124	6.57599	5.99254	1.13634	1.13008	1.02981	0.184389	0.176423	0.0423815	0.0696142	0.0176158	0.0354946	0.052901
sp|P15056|BRAF_HUMAN	BRAF	BRAF_HUMAN Serine/threonine-protein kinase B-raf	10	5.30273	6.00665	5.6896	6.47003	6.47155	6.18451	6.64034	6.69825	6.38191	6.1708	7.01453	6.95308	6.13279	5.47454	6.31354	6.09515	5.86725	6.49866	6.63008	6.00401	1.10762	1.13001	1.02331	0.147458	0.176341	0.0332401	0.0842485	0.0354626	0.0630752	0.0608963
sp|Q9BPX7-2|CG025_HUMAN	C7orf25	CG025_HUMAN Isoform 2 of UPF0415 protein C7orf25	3	5.08386	6.0339	6.12119	6.64188	6.27894	5.8726	6.75024	7.0157	6.23925	5.77787	7.31748	7.64913	5.66303	5.08115	6.6936	5.78018	5.97021	6.47937	6.74593	5.80449	1.08528	1.12993	0.972243	0.118072	0.176237	-0.0406118	0.108707	0.0781578	0.130816	0.114897
sp|Q8ND76|CCNY_HUMAN	CCNY	CCNY_HUMAN Cyclin-Y	3	6.20678	5.62259	5.96216	5.45715	6.58022	6.27516	6.36936	6.05876	6.36003	6.72671	6.62865	6.55107	6.38242	6.41402	6.21296	6.19196	5.81217	6.32088	6.56661	6.30034	1.08752	1.1298	1.08399	0.121047	0.176073	0.116353	0.0579381	0.0342258	0.023657	0.0181067
sp|P0CG08|GPHRB_HUMAN	GPR89B	GPHRB_HUMAN Golgi pH regulator B	5	5.53041	6.06714	5.40073	6.32783	6.35905	7.3291	7.22437	6.4049	6.41607	6.7542	6.30351	6.87851	5.75638	5.67492	6.03057	5.54232	5.83153	6.82935	6.58807	5.75105	1.17111	1.12973	0.986199	0.227875	0.175983	-0.0200491	0.0752755	0.0759507	0.0413389	0.0358499
sp|Q5VSL9|STRP1_HUMAN	STRIP1	STRP1_HUMAN Striatin-interacting protein 1	14	5.19976	5.95547	6.06138	6.75232	6.25337	6.35692	6.64494	6.84491	6.85336	6.39911	6.82548	6.99597	5.77449	5.19397	6.11285	5.77569	5.99223	6.52503	6.76848	5.71425	1.08892	1.12954	0.95361	0.122892	0.175738	-0.0685294	0.106067	0.0413849	0.0380173	0.0667897
sp|Q96LL9|DJC30_HUMAN	DNAJC30	DJC30_HUMAN DnaJ homolog subfamily C member 30	1	5.51197	5.67722	5.86955	6.94717	6.49064	6.79921	6.32558	6.65798	6.64705	6.72008	6.8231	6.92405	5.70272	5.62933	5.40706	5.86728	6.00148	6.56835	6.77857	5.6516	1.09446	1.12948	0.941701	0.130214	0.175663	-0.086659	0.107836	0.0312388	0.0178388	0.0337933
sp|P17812|PYRG1_HUMAN	CTPS1	PYRG1_HUMAN CTP synthase 1	30	5.4399	6.01292	5.8537	6.51783	6.24193	6.33769	6.67281	7.21577	6.68882	6.30639	6.95206	6.96009	5.82906	5.05026	6.12914	5.7916	5.95609	6.61705	6.72684	5.70001	1.11097	1.12941	0.957007	0.151823	0.175564	-0.0633992	0.0748167	0.0664681	0.045687	0.0804832
sp|Q14457|BECN1_HUMAN	BECN1	BECN1_HUMAN Beclin-1	5	5.77977	6.10078	5.96534	6.15756	6.19998	7.03195	6.7263	7.00694	6.54184	6.85705	7.20144	6.50679	5.54908	5.13951	5.7677	5.46798	6.00086	6.74129	6.77678	5.48107	1.12339	1.1293	0.91338	0.167855	0.17543	-0.130713	0.0279975	0.0573427	0.047806	0.0475314
sp|P53675|CLH2_HUMAN	CLTCL1	CLH2_HUMAN Clathrin heavy chain 2	1	5.38134	5.91587	6.3888	6.59821	5.5277	5.44713	6.57889	6.99534	6.36327	7.82169	6.64461	6.59177	5.44255	5.49983	6.27945	6.52355	6.07105	6.13727	6.85534	5.93635	1.01091	1.12918	0.977811	0.0156486	0.17528	-0.0323723	0.0891418	0.12548	0.0956487	0.0921074
sp|P31930|QCR1_HUMAN	UQCRC1	QCR1_HUMAN Cytochrome b-c1 complex subunit 1, mitochondrial	46	5.28019	5.96095	5.90261	6.64483	6.32306	6.61006	6.86171	6.97336	6.54024	6.39668	7.02006	6.9039	5.73747	5.04097	6.20301	5.6009	5.94714	6.69205	6.71522	5.64559	1.12525	1.12915	0.949294	0.17025	0.175237	-0.0750735	0.0938102	0.0432056	0.0438912	0.0847463
sp|P31146|COR1A_HUMAN	CORO1A	COR1A_HUMAN Coronin-1A	7	5.34662	5.93257	5.83323	6.35275	6.2549	6.73977	6.94461	7.1875	6.55273	6.32214	6.88558	6.73368	5.78106	5.07095	6.35534	5.70656	5.86629	6.7817	6.62353	5.72848	1.15604	1.12908	0.976507	0.209197	0.175152	-0.0342973	0.0704352	0.0583951	0.0366361	0.0917399
sp|P53992|SC24C_HUMAN	SEC24C	SC24C_HUMAN Protein transport protein Sec24C	24	5.23043	5.58735	6.37716	6.56701	6.21808	6.59667	6.73983	6.78435	6.47809	6.53818	7.19335	6.61865	5.59763	5.36863	6.32908	5.77549	5.94049	6.58473	6.70707	5.76771	1.10845	1.12904	0.970915	0.148544	0.175101	-0.0425833	0.107001	0.0390624	0.0490919	0.0710212
sp|Q9GZT9|EGLN1_HUMAN	EGLN1	EGLN1_HUMAN Egl nine homolog 1	14	5.04492	5.86558	6.18889	6.4515	6.29061	6.28826	6.6494	6.9095	6.24839	6.25932	7.25556	6.82552	6.11598	5.06615	6.53444	6.00597	5.88772	6.53444	6.6472	5.93064	1.10984	1.12899	1.00729	0.150354	0.175037	0.0104769	0.103747	0.0462446	0.0732585	0.104485
sp|Q96JK2|DCAF5_HUMAN	DCAF5	DCAF5_HUMAN DDB1- and CUL4-associated factor 5	1	5.88932	5.68312	5.94305	5.88091	6.7961	6.84661	7.15281	6.34235	6.18286	6.42287	7.06065	6.74696	5.87653	6.02139	5.881	5.27345	5.8491	6.78447	6.60333	5.76309	1.15992	1.12895	0.985296	0.214021	0.17498	-0.0213715	0.0194945	0.0492649	0.0579393	0.057831
sp|Q8N4J0|CI041_HUMAN	C9orf41	CI041_HUMAN UPF0586 protein C9orf41	8	5.62375	5.97033	5.87702	6.50166	6.184	6.64473	6.63808	6.7877	6.92071	6.77775	6.99626	6.36588	5.90643	5.33329	6.00186	5.47055	5.99319	6.56363	6.76515	5.67803	1.09518	1.12881	0.947414	0.131169	0.174798	-0.077933	0.0616123	0.0399668	0.041563	0.0574231
sp|Q6ICH7|ASPH2_HUMAN	ASPHD2	ASPH2_HUMAN Aspartate beta-hydroxylase domain-containing protein 2	2	5.52209	6.18453	6.146	6.29278	5.60454	6.03529	6.37832	6.59543	6.62834	7.03313	6.86746	6.72534	5.71192	6.24369	6.07382	5.95733	6.03635	6.15339	6.81357	5.99669	1.01939	1.12876	0.99343	0.0277061	0.174734	-0.00951006	0.0577212	0.0702869	0.0258693	0.0372388
sp|P23469|PTPRE_HUMAN	PTPRE	PTPRE_HUMAN Receptor-type tyrosine-protein phosphatase epsilon	7	5.51016	5.76777	6.10727	6.20698	6.26308	6.89495	6.28732	6.50977	6.80781	6.66348	6.43425	6.72423	6.279	5.55794	5.98571	6.00028	5.89804	6.48878	6.65744	5.95573	1.10016	1.12875	1.00978	0.13771	0.174731	0.0140421	0.054206	0.0451017	0.0240524	0.0499618
sp|Q9Y6V7|DDX49_HUMAN	DDX49	DDX49_HUMAN Probable ATP-dependent RNA helicase DDX49	3	5.52756	5.96298	6.17763	6.35859	6.52711	7.09604	6.26587	6.64138	7.08057	6.85631	6.60378	6.57872	5.86861	5.41405	5.65323	5.38758	6.00669	6.6326	6.77984	5.58087	1.1042	1.12872	0.929109	0.143004	0.174682	-0.106081	0.0596032	0.0522627	0.0348761	0.0404945
tr|C9JQN7|C9JQN7_HUMAN	EIF3B	C9JQN7_HUMAN Eukaryotic translation initiation factor 3 subunit B (Fragment)	3	5.65715	6.2904	6.08838	5.78266	6.26792	7.75169	5.53708	6.7657	6.65885	7.23407	6.75928	6.23171	5.43167	5.83812	5.88331	5.82203	5.95465	6.5806	6.72098	5.74378	1.10512	1.12869	0.964588	0.144202	0.174655	-0.052015	0.0483526	0.141262	0.0612248	0.0365066
sp|Q8NCD3|HJURP_HUMAN	HJURP	HJURP_HUMAN Holliday junction recognition protein	1	6.22189	6.12899	6.05193	5.72819	6.07092	6.95015	6.17473	7.07256	6.97957	6.79759	6.75612	6.70322	5.66757	5.34523	5.39711	5.95425	6.03275	6.56709	6.80912	5.59104	1.08857	1.12869	0.926781	0.122438	0.174654	-0.109699	0.0355727	0.0787504	0.0176254	0.050145
sp|Q9H7Z6-2|KAT8_HUMAN	KAT8	KAT8_HUMAN Isoform 2 of Histone acetyltransferase KAT8	5	5.63431	5.89212	5.91048	6.20492	5.72663	6.20102	6.47984	6.24842	6.83748	6.29579	6.91761	6.63307	6.46999	6.68133	5.67336	6.19362	5.91046	6.16398	6.67099	6.25457	1.04289	1.12868	1.05822	0.0605918	0.174631	0.081642	0.0394742	0.0512636	0.0415741	0.0696944
sp|Q15742|NAB2_HUMAN	NAB2	NAB2_HUMAN NGFI-A-binding protein 2	12	4.97488	6.04815	5.91156	6.56781	6.35446	6.32711	6.68583	6.83223	6.42848	6.22376	6.87386	6.99995	6.12342	5.41337	6.52148	5.71364	5.8756	6.54991	6.63151	5.94298	1.11476	1.12865	1.01147	0.156738	0.174602	0.0164497	0.11296	0.0380175	0.0551975	0.0812978
sp|Q9BUT1|BDH2_HUMAN	BDH2	BDH2_HUMAN 3-hydroxybutyrate dehydrogenase type 2	4	6.25656	5.72344	5.44708	6.68773	6.13941	6.55912	6.74937	6.98927	6.47077	6.49164	7.16238	7.08794	5.96169	4.86595	5.90948	5.49817	6.0287	6.60929	6.80318	5.55882	1.0963	1.12847	0.92206	0.132648	0.174362	-0.117068	0.0917418	0.0543644	0.0548456	0.0910801
sp|O75110|ATP9A_HUMAN	ATP9A	ATP9A_HUMAN Probable phospholipid-transporting ATPase IIA	3	5.37861	5.74254	6.32593	6.87446	6.76319	6.20657	6.97106	6.82777	7.24212	5.89063	7.12305	7.18966	5.18385	5.71165	5.53845	5.03047	6.08038	6.69215	6.86137	5.36611	1.10061	1.12844	0.882527	0.138307	0.174333	-0.180287	0.108158	0.0500842	0.0945859	0.0584347
sp|O14908|GIPC1_HUMAN	GIPC1	GIPC1_HUMAN PDZ domain-containing protein GIPC1	13	5.18775	5.96929	5.95338	6.26552	6.38761	6.38835	6.95565	6.87485	6.50064	6.40959	6.86807	6.59779	6.13405	4.99396	6.66257	5.85094	5.84398	6.65161	6.59402	5.91038	1.1382	1.12834	1.01136	0.186752	0.174206	0.0162984	0.0787881	0.0460342	0.0300578	0.117999
sp|P07099|HYEP_HUMAN	EPHX1	HYEP_HUMAN Epoxide hydrolase 1	25	5.22888	5.69162	5.99095	6.39616	6.19472	6.47205	6.83646	6.82431	6.22326	6.46307	6.80838	6.80291	5.86706	5.44619	6.64825	6.10573	5.8269	6.58188	6.5744	6.01681	1.12957	1.12828	1.03259	0.175772	0.174131	0.046269	0.084477	0.0468729	0.0432593	0.0833581
sp|P26640|SYVC_HUMAN	VARS	SYVC_HUMAN Valine--tRNA ligase	95	5.34326	6.09052	5.87141	6.48412	6.47771	6.71445	6.69509	7.10192	6.70636	6.52192	6.87587	6.73465	5.68812	5.17336	5.90915	5.61209	5.94733	6.74729	6.7097	5.59568	1.13451	1.12819	0.940873	0.182067	0.174007	-0.0879281	0.0800114	0.0384807	0.0216845	0.0551236
sp|O00562|PITM1_HUMAN	PITPNM1	PITM1_HUMAN Membrane-associated phosphatidylinositol transfer protein 1	10	5.33989	5.98036	5.91949	6.4801	6.25052	6.61559	6.75919	6.7056	6.81623	6.30974	6.69234	6.9421	5.88021	5.36168	6.19822	5.74875	5.92996	6.58272	6.6901	5.79722	1.11008	1.12819	0.977615	0.150663	0.174006	-0.0326624	0.0787056	0.0348273	0.0408526	0.0597324
sp|Q9C029-1|TRIM7_HUMAN	TRIM7	TRIM7_HUMAN Isoform 4 of Tripartite motif-containing protein 7	1	4.68831	7.02683	6.89299	5.28738	5.90248	6.64391	5.83896	6.48948	6.81575	7.08393	7.35075	5.70791	5.53086	7.36358	7.053	4.32387	5.97388	6.21871	6.73958	6.06783	1.04098	1.12818	1.01573	0.0579471	0.173992	0.0225124	0.195154	0.0655382	0.107073	0.232664
sp|Q9HBF4|ZFYV1_HUMAN	ZFYVE1	ZFYV1_HUMAN Zinc finger FYVE domain-containing protein 1	3	6.13189	5.99721	6.32664	6.0101	6.28253	6.13737	6.43855	6.46529	7.05291	6.74432	7.24423	6.56014	5.4804	5.44406	5.90991	5.77445	6.11646	6.33094	6.9004	5.65221	1.03507	1.12817	0.924097	0.0497217	0.173983	-0.113883	0.0249645	0.0240317	0.0444011	0.0401106
sp|Q86YT6|MIB1_HUMAN	MIB1	MIB1_HUMAN E3 ubiquitin-protein ligase MIB1	1	5.72409	5.18447	6.3016	6.67046	5.25801	6.53519	6.44042	6.20795	5.52214	7.24666	7.99175	6.18039	6.1003	5.35937	6.32908	6.94813	5.97016	6.11039	6.73524	6.18422	1.02349	1.12815	1.03586	0.0334967	0.17396	0.0508233	0.109331	0.0956811	0.163091	0.106116
sp|Q8IWF6|DEN6A_HUMAN	DENND6A	DEN6A_HUMAN Protein DENND6A	4	5.24052	6.21658	6.38345	6.4327	6.4573	6.54741	6.6714	6.71402	6.77625	6.31686	7.16301	7.12622	5.47216	5.34342	5.60059	5.53811	6.06831	6.59753	6.84558	5.48857	1.08721	1.12809	0.904464	0.120631	0.173878	-0.144865	0.0922097	0.0177633	0.0574418	0.0200528
sp|Q5VWK5|IL23R_HUMAN	IL23R	IL23R_HUMAN Interleukin-23 receptor	1	5.3445	6.1072	7.02227	5.88847	7.42592	7.33474	7.02903	6.4355	6.6318	7.33012	7.28345	6.23642	5.24323	5.14046	4.90058	4.64633	6.09061	7.0563	6.87045	4.98265	1.15855	1.12804	0.818087	0.212325	0.173817	-0.289673	0.114767	0.0633929	0.0770556	0.0534336
sp|Q96SB4-3|SRPK1_HUMAN	SRPK1	SRPK1_HUMAN Isoform 1 of SRSF protein kinase 1	9	5.55142	6.20725	5.89411	6.22573	6.49389	6.86791	6.40421	6.7645	6.6056	6.8074	6.87463	6.64796	5.74468	5.45824	5.65663	5.79584	5.96963	6.63263	6.7339	5.66385	1.11106	1.12803	0.948777	0.15194	0.173801	-0.0758585	0.0532065	0.0330516	0.0189893	0.0262438
sp|O95407|TNF6B_HUMAN	TNFRSF6B	TNF6B_HUMAN Tumor necrosis factor receptor superfamily member 6B	1	6.31674	7.34882	5.82053	4.53348	6.53252	6.0831	5.86146	7.24091	7.90538	7.44483	5.42579	6.31595	6.23065	4.90177	6.64875	5.38931	6.00489	6.4295	6.77299	5.79262	1.07071	1.12791	0.96465	0.0985676	0.173654	-0.0519224	0.19474	0.0946779	0.165238	0.136701
sp|Q9UM47|NOTC3_HUMAN	NOTCH3	NOTC3_HUMAN Neurogenic locus notch homolog protein 3	2	5.21888	6.34244	6.1751	6.35757	6.7303	6.43768	6.48974	5.99	6.4219	6.85352	7.21462	6.6847	5.3588	6.18256	5.53207	6.01012	6.0235	6.41193	6.79368	5.77089	1.06449	1.12786	0.958063	0.0901573	0.173593	-0.0618082	0.0901049	0.0481627	0.0488834	0.0673771
sp|P29992|GNA11_HUMAN	GNA11	GNA11_HUMAN Guanine nucleotide-binding protein subunit alpha-11	11	5.53987	6.10814	5.84996	6.46751	6.53508	6.78989	6.83126	6.91396	6.68664	6.77535	6.74339	6.82382	5.50977	5.0934	5.79355	5.53842	5.99137	6.76755	6.7573	5.48378	1.12955	1.12784	0.915281	0.175747	0.173561	-0.127714	0.0656542	0.0241352	0.00851716	0.0528533
sp|O75880|SCO1_HUMAN	SCO1	SCO1_HUMAN Protein SCO1 homolog, mitochondrial	4	5.55051	6.24169	6.013	6.27811	6.3457	6.44831	6.48113	6.8067	7.09311	6.45658	6.86857	6.74174	6.05645	4.98536	6.0862	5.54683	6.02083	6.52046	6.79	5.66871	1.08298	1.12775	0.941517	0.115012	0.17345	-0.0869413	0.0556038	0.0305737	0.0391087	0.0914634
sp|Q6N075-2|MFSD5_HUMAN	MFSD5	MFSD5_HUMAN Isoform 2 of Molybdate-anion transporter	2	6.14211	5.50018	5.7959	6.45511	5.26468	6.54899	7.00601	6.63306	7.15671	6.46879	6.38146	6.93712	5.48582	5.54425	6.47708	6.20274	5.97332	6.36318	6.73602	5.92747	1.06527	1.12768	0.992324	0.0912148	0.173362	-0.0111172	0.0694268	0.119247	0.0551852	0.0826348
sp|Q9H0R6|GATA_HUMAN	QRSL1	GATA_HUMAN Glutamyl-tRNA(Gln) amidotransferase subunit A, mitochondrial	14	5.28614	6.19716	5.81872	6.70034	6.37921	6.65358	6.31601	7.00669	6.4043	6.62002	6.89047	7.15189	5.59708	5.36327	5.81618	5.79894	6.00059	6.58887	6.76667	5.64387	1.09804	1.12767	0.940552	0.134927	0.173342	-0.0884202	0.0996101	0.0477674	0.0480041	0.0375394
sp|O96011|PX11B_HUMAN	PEX11B	PX11B_HUMAN Peroxisomal membrane protein 11B	2	5.31504	6.47063	6.62821	6.37299	6.44755	7.66644	7.25265	6.33716	6.7991	7.43693	7.16492	6.55008	5.22567	4.69231	5.45386	4.18646	6.19672	6.92595	6.98776	4.88957	1.11768	1.12765	0.789059	0.160508	0.173325	-0.341795	0.09636	0.0924737	0.0560557	0.115973
sp|Q9BVC3|DCC1_HUMAN	DSCC1	DCC1_HUMAN Sister chromatid cohesion protein DCC1	15	5.17195	5.95197	5.94513	6.43098	6.1345	6.7168	7.05691	6.97408	6.24288	6.60808	6.84904	6.79703	5.82801	5.14893	6.43328	5.71043	5.87501	6.72057	6.62426	5.78016	1.14393	1.12753	0.983856	0.193993	0.173168	-0.0234806	0.088676	0.0620017	0.041442	0.0911182
sp|Q99595|TI17A_HUMAN	TIMM17A	TI17A_HUMAN Mitochondrial import inner membrane translocase subunit Tim17-A	3	5.20983	5.95815	6.16562	6.21996	6.28488	7.37567	6.15369	6.42333	6.41706	6.88909	6.75775	6.49141	6.30531	5.43255	6.60824	5.30746	5.88839	6.55939	6.63883	5.91339	1.11395	1.12744	1.00425	0.155689	0.173055	0.0061122	0.0791775	0.0846435	0.0334209	0.108492
sp|Q9P0I2|EMC3_HUMAN	EMC3	EMC3_HUMAN ER membrane protein complex subunit 3	3	5.3488	5.64461	6.13736	6.60848	6.33555	6.48416	6.51781	7.18932	6.65135	6.5457	6.96373	6.60385	5.63595	5.70567	6.0828	5.54485	5.93481	6.63171	6.69116	5.74232	1.11743	1.12744	0.967565	0.160178	0.173053	-0.0475693	0.0934353	0.0573126	0.0279145	0.0411587
sp|Q9BZZ5-2|API5_HUMAN	API5	API5_HUMAN Isoform 2 of Apoptosis inhibitor 5	28	5.25423	5.956	5.82093	6.17018	6.36258	6.70689	6.75629	6.69949	6.41302	6.42299	6.69647	6.62523	6.21577	5.58773	6.40741	5.90479	5.80034	6.63131	6.53943	6.02892	1.14326	1.12742	1.03941	0.193158	0.173028	0.0557646	0.0674855	0.0272828	0.0219055	0.0596679
sp|Q6P1X5|TAF2_HUMAN	TAF2	TAF2_HUMAN Transcription initiation factor TFIID subunit 2	5	5.90963	6.05999	5.55781	6.32693	6.39895	6.86324	6.75758	6.4572	6.73688	6.79317	6.85836	6.50123	5.73589	5.83372	5.60419	5.60524	5.96359	6.61924	6.72241	5.69476	1.10994	1.12724	0.954921	0.150485	0.172797	-0.066546	0.0538053	0.0341686	0.0231441	0.0195588
sp|Q8IZQ5|SELH_HUMAN	SELH	SELH_HUMAN Selenoprotein H	3	5.03663	6.55484	6.35223	6.01156	5.71835	6.57334	6.90769	6.24995	6.19354	6.77528	7.70103	6.33172	5.37666	6.29183	6.02236	5.903	5.98881	6.36233	6.75039	5.89846	1.06237	1.12717	0.984913	0.0872852	0.172701	-0.0219316	0.112411	0.0795913	0.100826	0.0651031
sp|Q8NBN7|RDH13_HUMAN	RDH13	RDH13_HUMAN Retinol dehydrogenase 13	8	5.50522	6.05086	5.87346	6.91881	6.17586	6.79351	6.4225	6.68477	6.66182	6.82335	6.94839	7.00813	5.58862	5.02819	5.96541	5.55111	6.08709	6.51916	6.86042	5.53333	1.07098	1.12705	0.909028	0.098934	0.172545	-0.137603	0.0984452	0.042463	0.022325	0.0696219
sp|Q14642|I5P1_HUMAN	INPP5A	I5P1_HUMAN Type I inositol 1,4,5-trisphosphate 5-phosphatase	2	5.53179	5.77855	6.54674	6.42387	6.24761	6.25843	7.07036	6.78456	6.96801	6.03139	7.41083	6.95427	5.12185	5.00021	5.8322	6.03934	6.07024	6.59024	6.84112	5.4984	1.08566	1.12699	0.905797	0.118578	0.172481	-0.142741	0.0811028	0.0616847	0.0847787	0.0935663
sp|Q02750|MP2K1_HUMAN	MAP2K1	MP2K1_HUMAN Dual specificity mitogen-activated protein kinase kinase 1	16	5.33798	5.89396	5.76473	6.42138	6.47665	6.52064	6.67677	7.04623	6.48494	6.42966	6.8634	6.6131	5.95998	5.17043	6.30922	6.03093	5.85451	6.68007	6.59777	5.86764	1.14101	1.12696	1.00224	0.190315	0.172431	0.00323132	0.0762452	0.0387372	0.0292574	0.0832758
sp|P14618|KPYM_HUMAN	PKM	KPYM_HUMAN Pyruvate kinase PKM	371	5.14579	5.6731	6.15264	6.42307	6.20658	6.28359	6.75466	6.91661	6.41485	6.25304	6.9426	6.75081	6.0693	5.48561	6.51293	6.01483	5.84865	6.54036	6.59032	6.02067	1.11827	1.12681	1.02941	0.161266	0.172246	0.0418198	0.0960736	0.053319	0.0475341	0.0698788
sp|Q9BXB4|OSB11_HUMAN	OSBPL11	OSB11_HUMAN Oxysterol-binding protein-related protein 11	11	5.36132	6.1444	6.2453	6.21742	6.21452	6.60153	6.80367	6.73062	6.70787	6.42348	7.07978	6.79545	5.8932	4.93503	6.11602	5.73039	5.99211	6.58759	6.75164	5.66866	1.09938	1.12676	0.946021	0.136686	0.172175	-0.0800564	0.0705383	0.0398289	0.0400359	0.0906731
sp|Q9HCL2|GPAT1_HUMAN	GPAM	GPAT1_HUMAN Glycerol-3-phosphate acyltransferase 1, mitochondrial	3	6.09516	5.89101	5.40268	6.38122	6.54031	7.00551	6.63746	6.49626	6.97947	6.00515	7.32113	6.47541	5.32088	5.66293	6.09344	5.69197	5.94252	6.66988	6.69529	5.69231	1.1224	1.12668	0.957895	0.166588	0.172072	-0.0620613	0.0693721	0.0346925	0.0861061	0.0555284
sp|Q6ZMI0|PPR21_HUMAN	PPP1R21	PPR21_HUMAN Protein phosphatase 1 regulatory subunit 21	18	5.07487	5.83194	6.21917	6.64694	6.0723	6.37845	6.83208	6.65669	6.48663	6.43797	7.0434	6.81612	5.70047	5.18728	6.55648	6.05922	5.94323	6.48488	6.69603	5.87586	1.09114	1.12667	0.988665	0.125833	0.172059	-0.0164466	0.11236	0.051269	0.0427243	0.0983448
sp|Q9BQ70|TCF25_HUMAN	TCF25	TCF25_HUMAN Transcription factor 25	19	5.36747	6.11681	5.75914	6.55109	6.64164	6.98233	6.81185	7	6.66106	6.90893	6.67369	6.56339	5.62322	5.261	5.74945	5.32894	5.94863	6.85895	6.70177	5.49065	1.15303	1.12661	0.923012	0.205432	0.171985	-0.115579	0.0848836	0.0244773	0.0218808	0.0425105
sp|O43772|MCAT_HUMAN	SLC25A20	MCAT_HUMAN Mitochondrial carnitine/acylcarnitine carrier protein	3	4.90299	5.84837	6.45954	6.67405	6.33632	6.29816	6.8384	7.28859	6.44846	6.64913	6.28746	7.52061	5.63675	5.22803	5.87812	5.70502	5.97124	6.69037	6.72641	5.61198	1.12043	1.12647	0.939835	0.164056	0.171808	-0.0895201	0.132877	0.0700517	0.0817293	0.0490717
sp|Q86U06|RBM23_HUMAN	RBM23	RBM23_HUMAN Probable RNA-binding protein 23	5	5.71501	5.7186	5.86291	6.4855	6.07803	5.95893	6.62216	6.12774	6.36076	6.4295	7.49726	6.50127	6.39426	5.78207	5.79188	6.67413	5.94551	6.19672	6.6972	6.16058	1.04225	1.12643	1.03618	0.0597043	0.171758	0.051268	0.0616481	0.0471767	0.0801009	0.0724443
sp|P54577|SYYC_HUMAN	YARS	SYYC_HUMAN Tyrosine--tRNA ligase, cytoplasmic	73	5.23742	5.92453	5.911	6.42224	6.46947	6.50648	6.71354	7.07484	6.67921	6.32378	6.82036	6.63901	5.9337	5.46418	6.19546	5.68478	5.8738	6.69108	6.61559	5.81953	1.13914	1.12629	0.990761	0.187946	0.171576	-0.0133909	0.0828066	0.0414682	0.0316687	0.0542293
sp|Q8NEV8|EXPH5_HUMAN	EXPH5	EXPH5_HUMAN Exophilin-5	2	5.74888	5.49753	5.62433	6.09468	6.49701	7.3712	6.68765	6.67231	5.74501	6.91808	6.3913	6.81074	6.31465	5.93983	5.94533	5.74146	5.74136	6.80704	6.46628	5.98532	1.18562	1.12626	1.04249	0.245637	0.171545	0.0600365	0.0447509	0.0566941	0.0822514	0.039958
sp|O75794|CD123_HUMAN	CDC123	CD123_HUMAN Cell division cycle protein 123 homolog	12	5.27767	6.18281	6.01978	6.32634	6.46461	6.82018	6.70692	7.08959	6.77957	6.45941	6.85845	6.7132	5.82022	4.84853	6.18208	5.45063	5.95165	6.77033	6.70266	5.57536	1.13755	1.12618	0.936776	0.185935	0.171444	-0.0942234	0.0783727	0.0383173	0.0257647	0.102089
sp|Q9UKU6|TRHDE_HUMAN	TRHDE	TRHDE_HUMAN Thyrotropin-releasing hormone-degrading ectoenzyme	1	5.29921	5.82896	6.92953	6.61751	6.58865	6.23501	7.55351	7.62137	7.26329	6.52044	7.69335	6.31072	5.15199	3.86447	5.31854	5.20346	6.1688	6.99963	6.94695	4.88461	1.13468	1.12614	0.791825	0.182289	0.171389	-0.336746	0.120284	0.0992161	0.0926905	0.13996
sp|Q9Y2D4|EXC6B_HUMAN	EXOC6B	EXC6B_HUMAN Exocyst complex component 6B	8	5.89623	6.10592	6.06543	6.33417	6.29778	6.57339	6.56299	6.59723	6.72137	6.72355	6.9455	7.08902	5.83262	5.34209	5.42949	5.4832	6.10044	6.50785	6.86986	5.52185	1.06678	1.12613	0.905156	0.0932677	0.171368	-0.143761	0.0295648	0.0216318	0.0262025	0.03897
sp|Q8TCX1|DC2L1_HUMAN	DYNC2LI1	DC2L1_HUMAN Cytoplasmic dynein 2 light intermediate chain 1	1	5.81399	4.37386	6.48565	6.75093	5.78099	6.18957	6.88166	6.91174	6.08503	6.89863	6.57982	6.81327	6.13094	6.27988	5.83055	6.19349	5.85611	6.44099	6.59419	6.10872	1.09988	1.12604	1.04314	0.13734	0.171253	0.0609269	0.181679	0.0857243	0.0553833	0.0319606
sp|Q9HAU4|SMUF2_HUMAN	SMURF2	SMUF2_HUMAN E3 ubiquitin-protein ligase SMURF2	14	5.34041	6.00711	6.08811	6.49996	6.43009	6.68037	6.58969	6.81896	6.52977	6.73963	6.83177	6.84987	5.72345	5.42893	5.73338	5.7085	5.9839	6.62978	6.73776	5.64857	1.10794	1.12598	0.943961	0.147875	0.171184	-0.0832011	0.0802498	0.0246053	0.0217909	0.0259854
sp|O15530|PDPK1_HUMAN	PDPK1	PDPK1_HUMAN 3-phosphoinositide-dependent protein kinase 1	9	5.33394	5.878	6.16731	6.6997	6.13498	6.51916	6.59663	6.85461	6.42223	6.58291	7.11311	6.98496	5.932	5.0871	5.8551	5.83827	6.01974	6.52635	6.7758	5.67812	1.08416	1.1256	0.94325	0.116575	0.170691	-0.0842879	0.0946805	0.0456186	0.0481815	0.0697623
sp|Q6UX53|MET7B_HUMAN	METTL7B	MET7B_HUMAN Methyltransferase-like protein 7B	4	5.03068	6.21096	5.63315	6.44462	6.35516	6.79971	6.32369	7.07791	6.35279	6.11073	6.9328	6.85099	5.33887	5.32671	6.94133	6.26991	5.82985	6.63912	6.56183	5.9692	1.13881	1.12556	1.0239	0.187532	0.170638	0.0340794	0.108511	0.0548932	0.0602189	0.131398
sp|Q5VW32|BROX_HUMAN	BROX	BROX_HUMAN BRO1 domain-containing protein BROX	12	5.20229	5.81921	6.1315	6.43941	6.41933	6.47606	6.8003	7.02091	6.47092	6.27443	7.02884	6.7764	5.90039	4.85519	6.55015	5.83469	5.8981	6.67915	6.63765	5.7851	1.13242	1.12539	0.980842	0.179414	0.170421	-0.0279077	0.0896014	0.0423673	0.0501187	0.120827
sp|O75911|DHRS3_HUMAN	DHRS3	DHRS3_HUMAN Short-chain dehydrogenase/reductase 3	4	5.29713	6.2945	6.3804	6.08329	6.14694	6.42077	6.32041	6.77691	7.09036	6.69603	6.2268	7.05594	5.63052	5.51961	6.40421	5.65616	6.01383	6.41626	6.76728	5.80262	1.06692	1.12529	0.96488	0.093448	0.170293	-0.0515784	0.0821173	0.0414124	0.0594089	0.0698668
sp|Q9NVR0|KLH11_HUMAN	KLHL11	KLH11_HUMAN Kelch-like protein 11	3	5.23614	5.92733	6.24185	7.1347	6.32764	6.30991	6.40641	7.00418	6.75487	6.51803	6.94988	7.39151	5.81625	5.15895	5.45126	5.37108	6.135	6.51204	6.90357	5.44939	1.06146	1.12528	0.888245	0.0860439	0.170279	-0.170971	0.128411	0.0507931	0.0536139	0.0502641
sp|Q9P0V3|SH3B4_HUMAN	SH3BP4	SH3B4_HUMAN SH3 domain-binding protein 4	5	5.45829	6.14304	6.14095	6.30952	6.34914	6.67173	6.35578	6.71798	6.71494	6.91359	6.45973	6.97612	5.79824	5.56896	5.72627	5.69571	6.01295	6.52366	6.76609	5.6973	1.08493	1.12525	0.947504	0.117608	0.17025	-0.0777959	0.0628832	0.030443	0.0343808	0.0168055
sp|P52824|DGKQ_HUMAN	DGKQ	DGKQ_HUMAN Diacylglycerol kinase theta	2	5.99562	5.19004	5.62783	6.52405	6.32275	6.70093	6.70968	7.27842	7.41947	5.8941	6.7102	6.23673	6.38477	5.36531	6.18941	5.4507	5.83438	6.75294	6.56513	5.84755	1.15744	1.12525	1.00226	0.210936	0.170242	0.00325109	0.0969309	0.0583487	0.100618	0.0880625
sp|Q9NW08|RPC2_HUMAN	POLR3B	RPC2_HUMAN DNA-directed RNA polymerase III subunit RPC2	14	5.31758	5.98023	6.04054	6.53393	6.23576	6.62171	6.71638	6.7602	6.75087	6.6942	6.73267	6.68083	5.78482	5.45349	5.77844	5.91835	5.96807	6.58351	6.71464	5.73378	1.10312	1.12509	0.960742	0.141593	0.170046	-0.0577792	0.0837085	0.0362922	0.00486292	0.0344758
sp|Q9BRN9|TM2D3_HUMAN	TM2D3	TM2D3_HUMAN TM2 domain-containing protein 3	3	5.10314	5.47594	6.45671	6.28635	6.16642	6.7295	6.3444	6.38481	7.89991	6.60831	6.15014	5.57869	6.56836	5.91404	5.70282	6.63046	5.83053	6.40628	6.55926	6.20392	1.09875	1.12498	1.06404	0.135859	0.169905	0.0895518	0.110918	0.0367512	0.150632	0.0750225
sp|Q8N2E2|VWDE_HUMAN	VWDE	VWDE_HUMAN von Willebrand factor D and EGF domain-containing protein	2	5.01697	5.53013	6.51097	6.41851	6.46865	6.2884	6.28035	5.50053	6.768	6.50054	6.69682	6.44324	9.34935	4.85399	6.14841	5.22513	5.86915	6.13448	6.60215	6.39422	1.04521	1.12489	1.08946	0.0637913	0.169786	0.123618	0.122663	0.0703372	0.0234724	0.319644
sp|O75530|EED_HUMAN	EED	EED_HUMAN Polycomb protein EED	20	5.34994	5.98982	5.88672	6.48904	6.25954	6.45886	6.44283	6.70472	6.53859	6.42744	6.74848	6.96019	5.98903	5.39852	6.29601	6.06029	5.92888	6.46649	6.66868	5.93596	1.09068	1.12478	1.00119	0.125223	0.169641	0.00172238	0.0787775	0.0282621	0.0353234	0.0642785
sp|Q86X55|CARM1_HUMAN	CARM1	CARM1_HUMAN Histone-arginine methyltransferase CARM1	25	5.18094	6.11429	5.84555	6.47083	6.49985	6.79297	6.93941	7.07895	6.72302	6.354	6.78875	6.6861	5.76384	5.06168	6.05916	5.64066	5.9029	6.8278	6.63797	5.63134	1.15668	1.12453	0.953994	0.209995	0.169317	-0.0679475	0.0923622	0.036301	0.0292278	0.0742992
sp|P19784|CSK22_HUMAN	CSNK2A2	CSK22_HUMAN Casein kinase II subunit alpha'	19	5.77452	5.85586	5.97196	6.36165	6.41158	6.52591	6.58698	6.73783	6.6227	6.61106	6.93535	6.77901	5.76724	5.38474	5.96085	5.71277	5.991	6.56557	6.73703	5.7064	1.09591	1.12453	0.952496	0.132125	0.169316	-0.0702154	0.043406	0.020701	0.0226789	0.0419547
sp|Q9UKL6|PPCT_HUMAN	PCTP	PPCT_HUMAN Phosphatidylcholine transfer protein	3	5.23987	6.11182	6.2498	6.23507	6.19557	6.57484	6.93104	6.59129	6.12065	6.69266	6.8813	7.10705	5.99602	5.26496	6.68791	5.12015	5.95914	6.57319	6.70042	5.76726	1.10304	1.12439	0.967801	0.141488	0.169146	-0.0472181	0.0811338	0.0457231	0.0629816	0.125475
sp|Q6ZPD9|D19L3_HUMAN	DPY19L3	D19L3_HUMAN Probable C-mannosyltransferase DPY19L3	1	5.75575	5.66985	5.39027	6.17503	6.10721	5.56897	6.72609	7.07702	6.21286	5.36482	6.91195	7.35914	6.40631	5.24443	6.99927	7.03104	5.74772	6.36982	6.46219	6.42026	1.10823	1.1243	1.11701	0.148262	0.169033	0.159641	0.05651	0.104819	0.134703	0.130038
sp|Q9UFC0|LRWD1_HUMAN	LRWD1	LRWD1_HUMAN Leucine-rich repeat and WD repeat-containing protein 1	9	5.51155	6.05841	6.27163	6.51266	6.25109	6.55141	6.89795	7.04521	6.66985	6.33491	7.30142	7.0753	5.50007	4.88152	5.6523	5.48472	6.08856	6.68641	6.84537	5.37965	1.09819	1.1243	0.883567	0.135131	0.169027	-0.178589	0.0701468	0.0533128	0.0626759	0.0633115
sp|Q9NWX5|ASB6_HUMAN	ASB6	ASB6_HUMAN Ankyrin repeat and SOCS box protein 6	9	5.66046	5.6598	5.84363	6.49621	6.24867	6.52274	6.34665	6.33245	6.50155	6.69576	6.8981	6.50545	6.13522	6.11041	6.20615	5.83675	5.91502	6.36263	6.65022	6.07213	1.07567	1.12429	1.02656	0.105238	0.169017	0.037819	0.0671165	0.0181001	0.0283427	0.0266926
sp|O75844|FACE1_HUMAN	ZMPSTE24	FACE1_HUMAN CAAX prenyl protease 1 homolog	17	5.20736	5.79049	5.98686	6.13803	6.6686	6.81353	6.97284	6.82537	6.27368	6.47248	6.71308	6.53514	5.67236	5.32528	6.67446	5.93045	5.78069	6.82008	6.49859	5.90064	1.17981	1.12419	1.02075	0.238549	0.168887	0.0296304	0.0705523	0.0182258	0.0278982	0.0970021
sp|Q96IZ6|MET2A_HUMAN	METTL2A	MET2A_HUMAN Methyltransferase-like protein 2A	2	5.34673	5.71601	5.95414	5.86077	5.82905	6.0523	6.84264	6.74135	6.42334	6.10342	6.68404	6.50787	5.97099	6.59994	6.47521	6.89221	5.71941	6.36634	6.42967	6.48459	1.11311	1.12418	1.13379	0.154596	0.168877	0.181148	0.0466957	0.0787888	0.0378097	0.0592819
sp|Q9BQ24-2|ZFY21_HUMAN	ZFYVE21	ZFY21_HUMAN Isoform 2 of Zinc finger FYVE domain-containing protein 21	8	5.02126	6.23885	5.87295	6.81705	6.46346	6.15566	6.80268	6.85459	6.49996	6.23316	7.22007	6.97106	6.04009	5.0238	6.14536	5.64001	5.98753	6.5691	6.73106	5.71232	1.09713	1.12418	0.954036	0.133735	0.168874	-0.0678848	0.125652	0.049574	0.0663318	0.0889337
sp|Q9UPT9|UBP22_HUMAN	USP22	UBP22_HUMAN Ubiquitin carboxyl-terminal hydrolase 22	6	5.25941	5.99685	6.21386	6.62195	6.17634	6.23718	6.46421	7.03047	6.5543	6.26049	7.18444	7.08452	5.58935	5.27006	6.24039	5.81617	6.02302	6.47705	6.77094	5.72899	1.07538	1.12418	0.951183	0.10485	0.168869	-0.072205	0.0948417	0.0600873	0.0647598	0.0712063
sp|Q8TBP6|S2540_HUMAN	SLC25A40	S2540_HUMAN Solute carrier family 25 member 40	4	5.52102	6.49172	5.63917	6.60074	6.44439	6.79513	6.87949	6.35456	6.66113	6.8082	7.13075	6.66391	5.24433	5.40658	5.6497	5.70918	6.06316	6.61839	6.816	5.50245	1.09157	1.12417	0.907521	0.12641	0.168854	-0.139997	0.0926325	0.0389433	0.0323929	0.0392929
sp|P20073|ANXA7_HUMAN	ANXA7	ANXA7_HUMAN Annexin A7	22	5.11486	6.00022	5.80032	6.30441	6.26062	6.67285	6.74666	6.87042	6.35125	6.27322	6.72149	6.75617	5.93953	5.27206	6.73342	6.18251	5.80495	6.63764	6.52553	6.03188	1.14344	1.12413	1.03909	0.193386	0.168811	0.0553235	0.0869242	0.0398081	0.0381194	0.10042
sp|Q86UW7|CAPS2_HUMAN	CADPS2	CAPS2_HUMAN Calcium-dependent secretion activator 2	4	5.35467	5.94641	6.10689	6.48731	6.25809	6.18757	6.74306	6.72459	6.55111	6.70074	6.9456	6.66199	5.96943	5.1804	6.34698	5.83514	5.97382	6.47833	6.71486	5.83299	1.08445	1.12405	0.976425	0.116968	0.168704	-0.0344188	0.0788413	0.0457711	0.0247783	0.0833246
sp|P19367-3|HXK1_HUMAN	HK1	HXK1_HUMAN Isoform 3 of Hexokinase-1	34	5.62924	6.08375	5.76691	6.28482	6.40183	6.74564	6.85118	7.00987	6.62747	6.46721	6.9148	6.70131	5.91212	5.00886	6.02778	5.56721	5.94118	6.75213	6.6777	5.62899	1.1365	1.12397	0.947454	0.184593	0.168601	-0.0778728	0.0501282	0.0381432	0.0278291	0.0812533
sp|Q8N1P7|AIM1L_HUMAN	AIM1L	AIM1L_HUMAN Absent in melanoma 1-like protein	1	5.89043	5.8097	6.12642	6.39775	5.99725	6.0517	6.57226	6.82958	6.43287	6.92025	7.11274	6.76078	6.54912	5.0689	5.7199	5.76037	6.05607	6.3627	6.80666	5.77457	1.05063	1.12394	0.953517	0.0712555	0.168564	-0.0686689	0.0436698	0.0636582	0.0422757	0.104913
sp|Q99661|KIF2C_HUMAN	KIF2C	KIF2C_HUMAN Kinesin-like protein KIF2C	18	5.41917	5.77852	6.18733	6.22251	6.19988	6.49414	6.58733	6.86428	6.57804	6.45375	6.96798	6.53351	6.00671	5.74846	6.15066	5.80774	5.90188	6.53641	6.63332	5.92839	1.10751	1.12393	1.00449	0.147323	0.168556	0.00646577	0.0643351	0.04191	0.0345158	0.0311745
sp|P30307|MPIP3_HUMAN	CDC25C	MPIP3_HUMAN M-phase inducer phosphatase 3	2	5.37601	5.89315	6.56012	6.07809	6.25491	6.75914	6.48918	7.4584	6.91256	5.62643	6.95891	7.37201	5.72859	5.35118	5.69661	5.48472	5.97684	6.74041	6.71748	5.56527	1.12775	1.12392	0.93114	0.173452	0.168536	-0.102931	0.0818788	0.0773123	0.11256	0.0321844
sp|Q99959|PKP2_HUMAN	PKP2	PKP2_HUMAN Plakophilin-2	2	5.62964	5.96463	6.30806	6.3213	6.77371	6.94918	6.33564	5.87056	7.01164	6.80727	6.74612	6.65958	5.8149	5.3344	5.49825	5.97514	6.05591	6.48227	6.80615	5.65567	1.0704	1.12389	0.93391	0.0981565	0.168496	-0.0986446	0.0542708	0.0744451	0.0220085	0.0515911
tr|Q5JT07|Q5JT07_HUMAN	POMT1	Q5JT07_HUMAN Protein O-mannosyl-transferase 1 (Fragment)	2	5.10218	5.92173	6.89208	6.86454	5.26254	6.09374	6.26253	6.79157	6.65447	6.99732	8.03886	6.1597	6.30578	5.57631	5.06758	6.00908	6.19513	6.1026	6.96259	5.73969	0.985063	1.12388	0.926483	-0.0217123	0.168488	-0.110163	0.138328	0.103897	0.114274	0.0939017
sp|Q15208|STK38_HUMAN	STK38	STK38_HUMAN Serine/threonine-protein kinase 38	17	5.38219	6.08359	5.91265	6.47862	6.23597	6.52113	6.70172	6.90038	6.6169	6.5282	6.77639	6.88981	5.90014	5.39331	6.02273	5.65627	5.96426	6.5898	6.70282	5.74311	1.10488	1.12383	0.962921	0.143891	0.168426	-0.0545109	0.0762386	0.0428226	0.0240952	0.0484991
sp|Q7Z7A3|CTU1_HUMAN	CTU1	CTU1_HUMAN Cytoplasmic tRNA 2-thiolation protein 1	7	5.31958	6.14636	5.90569	6.6368	6.26393	6.67619	6.7172	6.6556	6.83143	6.6993	6.67883	6.77132	5.89943	5.25637	5.94791	5.59406	6.00211	6.57823	6.74522	5.67444	1.09599	1.12381	0.945408	0.13223	0.168396	-0.0809905	0.0911933	0.0320895	0.0103529	0.0563427
sp|Q4J6C6|PPCEL_HUMAN	PREPL	PPCEL_HUMAN Prolyl endopeptidase-like	13	5.2428	5.93953	5.96803	6.56961	6.15334	6.41269	6.72062	6.84683	6.41149	6.28458	6.90522	7.05539	5.7733	5.19661	6.37143	6.14853	5.92999	6.53337	6.66417	5.87247	1.10175	1.12381	0.990299	0.139797	0.168395	-0.0140635	0.0914822	0.0477772	0.0560853	0.0874831
sp|Q96T88-2|UHRF1_HUMAN	UHRF1	UHRF1_HUMAN Isoform 2 of E3 ubiquitin-protein ligase UHRF1	15	5.4468	5.77497	6.25953	6.46004	6.51825	6.63167	6.62037	6.86271	6.95678	6.50521	6.78315	6.65901	5.67371	5.29213	5.79283	5.76285	5.98533	6.65825	6.72604	5.63038	1.11243	1.12375	0.940696	0.153711	0.168325	-0.0881997	0.0768546	0.0218585	0.0284384	0.0410461
sp|Q99717|SMAD5_HUMAN	SMAD5	SMAD5_HUMAN Mothers against decapentaplegic homolog 5	5	5.30442	5.89024	6.30673	6.59655	6.42635	6.56388	6.93696	6.69788	6.8783	6.21071	7.17248	6.81833	5.67077	5.21957	5.6829	5.62393	6.02449	6.65627	6.76996	5.54929	1.10487	1.12374	0.921123	0.143875	0.168308	-0.118534	0.0930841	0.0326758	0.0596274	0.0398755
sp|Q96CM8|ACSF2_HUMAN	ACSF2	ACSF2_HUMAN Acyl-CoA synthetase family member 2, mitochondrial	7	5.45201	5.84494	5.93919	6.47465	6.35402	6.54658	6.74718	6.88936	6.6758	6.2389	6.9709	6.75631	5.95929	5.15102	6.25366	5.74619	5.9277	6.63429	6.66048	5.77754	1.1192	1.12362	0.974668	0.162469	0.168154	-0.0370165	0.0710688	0.0352478	0.0461548	0.0807664
sp|P12429|ANXA3_HUMAN	ANXA3	ANXA3_HUMAN Annexin A3	69	5.04248	5.85908	6.26762	6.20155	6.19707	6.30966	6.93242	6.99521	6.36699	6.18242	6.96933	6.73755	5.96984	5.21713	6.64583	6.10581	5.84268	6.60859	6.56407	5.98465	1.13109	1.12347	1.0243	0.177712	0.16796	0.0346366	0.0963114	0.0625763	0.0541361	0.0984365
sp|Q9UHL9-3|GT2D1_HUMAN	GTF2IRD1	GT2D1_HUMAN Isoform 3 of General transcription factor II-I repeat domain-containing protein 1	1	5.87318	5.47541	5.50511	7.33424	5.68046	6.25639	7.14126	6.18871	6.64957	7.7554	5.36442	7.40247	5.54062	4.91666	6.75408	6.16201	6.04699	6.3167	6.79296	5.84334	1.0446	1.12336	0.966323	0.0629562	0.167825	-0.0494221	0.145036	0.0960671	0.155772	0.135524
sp|Q16644|MAPK3_HUMAN	MAPKAPK3	MAPK3_HUMAN MAP kinase-activated protein kinase 3	9	5.14353	5.81838	5.99568	6.63886	6.16865	6.17392	6.88206	7.38885	6.39621	6.50602	6.7723	6.8327	5.88218	4.86261	6.55802	5.98001	5.89911	6.65337	6.62681	5.82071	1.12786	1.12336	0.986709	0.173587	0.167816	-0.019304	0.104221	0.089259	0.0315724	0.121106
sp|Q96IV0|NGLY1_HUMAN	NGLY1	NGLY1_HUMAN Peptide-N(4)-(N-acetyl-beta-glucosaminyl)asparagine amidase	6	5.47106	6.27894	6.52713	6.42727	5.8362	6.03391	5.93359	6.59772	7.01891	6.63241	7.03024	7.06686	6.04825	5.76928	5.74676	5.58149	6.1761	6.10035	6.93711	5.78644	0.987736	1.12322	0.936909	-0.0178029	0.167638	-0.0940188	0.0778743	0.055941	0.0294299	0.0334538
sp|Q92947|GCDH_HUMAN	GCDH	GCDH_HUMAN Glutaryl-CoA dehydrogenase, mitochondrial	6	5.76825	5.84557	6.18059	6.51313	6.41722	6.57782	6.60322	6.42805	6.56814	6.52154	7.03084	7.17777	5.71913	5.20225	6.03757	5.40892	6.07688	6.50658	6.82457	5.59197	1.07071	1.12304	0.920203	0.0985669	0.167407	-0.119976	0.0561933	0.0149974	0.0482199	0.0653084
sp|Q7Z6L1-4|TCPR1_HUMAN	TECPR1	TCPR1_HUMAN Isoform 4 of Tectonin beta-propeller repeat-containing protein 1	1	5.96861	5.30907	6.1822	7.03301	6.0272	6.20951	5.5606	6.66062	6.45536	6.43006	7.43804	7.18295	5.75658	5.32369	6.06886	6.39364	6.12322	6.11448	6.8766	5.88569	0.998573	1.12304	0.961208	-0.00206071	0.167405	-0.0570789	0.116168	0.074451	0.0744305	0.0774928
sp|Q9NZR2|LRP1B_HUMAN	LRP1B	LRP1B_HUMAN Low-density lipoprotein receptor-related protein 1B	1	6.18803	5.99096	5.54604	6.28834	6.41173	6.31334	6.66592	7.08411	6.80583	6.91519	6.96114	6.28548	5.6002	5.04256	5.85769	6.04344	6.00334	6.61878	6.74191	5.63597	1.10251	1.12303	0.938806	0.140798	0.167391	-0.0911014	0.0547934	0.0519667	0.0461563	0.0772461
sp|P41252|SYIC_HUMAN	IARS	SYIC_HUMAN Isoleucine--tRNA ligase, cytoplasmic	87	5.45633	6.16667	5.83719	6.64289	6.53498	6.70299	6.66383	7.22631	6.8461	6.55539	6.84472	6.8221	5.64737	4.97159	5.64165	5.4399	6.02577	6.78203	6.76708	5.42513	1.1255	1.12302	0.900321	0.170571	0.167387	-0.151489	0.0835565	0.0449365	0.0209179	0.0585017
sp|O00418|EF2K_HUMAN	EEF2K	EF2K_HUMAN Eukaryotic elongation factor 2 kinase	15	5.30585	6.0085	5.9825	6.5406	6.51841	6.72171	6.78776	7.2971	6.6281	6.51718	6.8591	6.76426	5.69288	5.28017	5.75524	5.34061	5.95936	6.83125	6.69216	5.51722	1.1463	1.12297	0.925808	0.196991	0.167314	-0.111215	0.084895	0.0484606	0.0224622	0.0437629
sp|P48200|IREB2_HUMAN	IREB2	IREB2_HUMAN Iron-responsive element-binding protein 2	22	5.08952	5.75812	6.11614	6.5203	6.2857	6.15337	6.89041	6.87618	6.44425	6.2078	6.83705	6.87889	6.05554	5.50238	6.49653	5.88784	5.87102	6.55142	6.592	5.98557	1.11589	1.1228	1.01951	0.158195	0.167105	0.0278781	0.103379	0.0590796	0.0489054	0.0688165
sp|Q8NFZ0-2|FBX18_HUMAN	FBXO18	FBX18_HUMAN Isoform 2 of F-box only protein 18	3	5.00296	6.01765	6.30395	6.33112	6.2315	6.72073	7.10853	6.36969	6.85561	6.52421	6.93814	6.23614	6.11557	5.88869	5.87751	5.47801	5.91392	6.60761	6.63852	5.83995	1.1173	1.12253	0.987491	0.160014	0.166748	-0.0181599	0.105453	0.0593763	0.048569	0.0453856
sp|Q9Y4E5|ZN451_HUMAN	ZNF451	ZN451_HUMAN Zinc finger protein 451	5	5.70821	5.98403	6.44347	5.89298	6.28379	6.39444	6.52124	5.93604	6.54217	7.00209	7.37603	6.05213	5.70581	5.86734	5.90984	6.38038	6.00717	6.28388	6.7431	5.96584	1.04606	1.12251	0.99312	0.064969	0.166727	-0.0099602	0.0520514	0.0400019	0.0849973	0.0486098
sp|Q8WWH5|TRUB1_HUMAN	TRUB1	TRUB1_HUMAN Probable tRNA pseudouridine synthase 1	17	5.09228	6.10195	6.13043	6.52276	6.22515	6.32698	6.61998	6.97928	6.62064	6.40011	7.13847	6.6097	5.97244	5.2587	6.17906	5.82208	5.96185	6.53785	6.69223	5.80807	1.09661	1.12251	0.974205	0.133054	0.166726	-0.0377024	0.102433	0.0517835	0.0469686	0.0679056
sp|O60684|IMA7_HUMAN	KPNA6	IMA7_HUMAN Importin subunit alpha-7	12	5.33001	6.33738	5.77451	6.27583	6.68019	6.68779	6.76281	7.34639	6.60402	6.32288	6.92815	6.76696	5.65866	4.90126	5.92256	5.70062	5.92943	6.86929	6.6555	5.54577	1.15851	1.12245	0.935296	0.212268	0.166654	-0.0965049	0.0796844	0.0466192	0.0387994	0.080242
tr|Q5SVL2|Q5SVL2_HUMAN	CASP7	Q5SVL2_HUMAN Caspase-7 (Fragment)	1	5.35847	3.8151	4.7371	8.35808	7.25169	7.182	7.69196	4.08411	6.32071	6.19914	6.75949	5.71596	6.3204	7.60981	5.86113	6.73483	5.56719	6.55244	6.24883	6.63154	1.17697	1.12244	1.19118	0.235084	0.166636	0.252396	0.35308	0.253489	0.0686676	0.112104
sp|Q86TM6|SYVN1_HUMAN	SYVN1	SYVN1_HUMAN E3 ubiquitin-protein ligase synoviolin	2	5.44478	6.10739	6.06815	6.14297	6.34667	6.69234	6.72682	6.73234	6.48788	6.2508	7.13625	6.79556	5.80883	5.11443	6.23664	5.90814	5.94082	6.62454	6.66762	5.76701	1.11509	1.12234	0.970743	0.157158	0.16651	-0.0428392	0.055902	0.0280913	0.0575696	0.0818282
sp|Q8WUK0|PTPM1_HUMAN	PTPMT1	PTPM1_HUMAN Phosphatidylglycerophosphatase and protein-tyrosine phosphatase 1	5	5.40074	6.12147	6.06452	6.51743	6.48493	6.80104	6.9127	7.06474	6.97772	6.44161	6.86895	6.76412	5.7716	4.95885	5.34156	5.50802	6.02604	6.81585	6.7631	5.39501	1.13107	1.12231	0.895282	0.177684	0.166474	-0.159585	0.0768299	0.0360431	0.0342135	0.0631015
sp|Q9Y276|BCS1_HUMAN	BCS1L	BCS1_HUMAN Mitochondrial chaperone BCS1	13	5.42836	5.91415	6.34501	6.6367	6.11622	6.67518	6.78729	6.82645	6.86605	6.22572	7.0567	7.15028	5.79019	5.18123	5.58008	5.4204	6.08106	6.60128	6.82469	5.49298	1.08555	1.12229	0.903293	0.118425	0.166441	-0.146734	0.0866155	0.0499402	0.0610224	0.0468141
sp|Q9NY93|DDX56_HUMAN	DDX56	DDX56_HUMAN Probable ATP-dependent RNA helicase DDX56	4	5.86947	6.65771	5.54259	6.24067	6.78677	6.94475	6.67429	6.02245	7.24873	6.97916	6.41609	6.639	5.57469	5.93	5.50433	4.96929	6.07761	6.60706	6.82074	5.49458	1.08712	1.12227	0.904069	0.120505	0.166425	-0.145496	0.0790625	0.0613319	0.0538714	0.0721923
sp|Q9UNT1-2|RBL2B_HUMAN	RABL2B	RBL2B_HUMAN Isoform 2 of Rab-like protein 2B	3	5.35285	5.78448	6.79404	6.425	5.95651	6.93839	6.10946	6.50746	7.27602	6.25308	7.0669	6.7375	5.63545	5.21488	5.95652	5.99146	6.08909	6.37796	6.83338	5.69958	1.04744	1.12223	0.936031	0.0668667	0.166371	-0.0953723	0.105781	0.0689736	0.065249	0.063281
sp|Q9NRF8|PYRG2_HUMAN	CTPS2	PYRG2_HUMAN CTP synthase 2	18	5.46576	5.80725	5.91779	6.64502	6.36418	6.59765	6.6152	6.77096	6.66276	6.47919	6.93155	6.67343	5.97056	5.17564	6.18181	5.74125	5.95895	6.587	6.68673	5.76731	1.10539	1.12213	0.96784	0.144562	0.166242	-0.0471595	0.0832692	0.0254636	0.0278127	0.0751721
sp|Q9NX47|MARH5_HUMAN	2021-03-05	MARH5_HUMAN E3 ubiquitin-protein ligase MARCH5	6	5.67031	5.7804	6.04825	6.21424	6.70181	6.46462	6.5299	6.30293	6.43078	6.21081	7.38498	6.5819	6.08846	5.74141	6.21873	5.63046	5.9283	6.49981	6.65212	5.91976	1.0964	1.1221	0.99856	0.13278	0.166195	-0.00207855	0.0418413	0.0253907	0.0769351	0.0471124
sp|Q9UHQ9|NB5R1_HUMAN	CYB5R1	NB5R1_HUMAN NADH-cytochrome b5 reductase 1	14	5.52453	6.012	5.86605	6.42523	6.41419	6.46211	6.63856	6.97074	6.40287	6.47252	7.03911	6.82189	5.8336	5.07421	6.24876	5.79364	5.95695	6.6214	6.6841	5.73755	1.11154	1.12207	0.963169	0.152562	0.166158	-0.054139	0.0626294	0.0380714	0.044789	0.0850117
sp|Q9BQB6|VKOR1_HUMAN	VKORC1	VKOR1_HUMAN Vitamin K epoxide reductase complex subunit 1	1	6.31703	6.02021	4.99684	6.55978	6.63847	6.57856	5.77443	6.43423	7.08651	6.31444	6.2721	7.13677	5.90319	5.43388	6.34717	6.1864	5.97347	6.35642	6.70246	5.96766	1.06411	1.12204	0.999028	0.089647	0.166122	-0.00140269	0.115085	0.0625118	0.070608	0.0670944
sp|Q96L93-2|KI16B_HUMAN	KIF16B	KI16B_HUMAN Isoform 2 of Kinesin-like protein KIF16B	3	5.37233	6.12321	6.02572	6.85473	6.4217	5.89465	6.55225	7.29727	6.06855	6.65529	7.71293	6.91379	6.36342	5.01856	5.65925	5.06636	6.094	6.54147	6.83764	5.5269	1.07343	1.12203	0.906941	0.102225	0.16611	-0.140919	0.0995921	0.0884395	0.0997888	0.113849
sp|Q15008|PSMD6_HUMAN	PSMD6	PSMD6_HUMAN 26S proteasome non-ATPase regulatory subunit 6	22	5.33409	6.08649	5.87247	6.11662	6.44859	6.97112	6.75397	6.74154	6.50397	6.54716	6.66541	6.54771	6.00864	5.2396	6.28186	5.88079	5.85242	6.72881	6.56606	5.85272	1.14975	1.12194	1.00005	0.201318	0.165996	7.51844e-05	0.0618962	0.0318781	0.0105587	0.0754614
sp|Q9NVF9-2|EKI2_HUMAN	ETNK2	EKI2_HUMAN Isoform 2 of Ethanolamine kinase 2	1	4.44673	6.15553	5.98803	7.21787	6.29948	5.42189	7.29159	7.35405	6.34174	5.87089	6.70828	7.78994	5.13417	5.10816	6.42593	6.44573	5.95204	6.59175	6.67771	5.7785	1.10748	1.12192	0.970843	0.147278	0.16597	-0.0426898	0.19183	0.139174	0.122328	0.131373
sp|Q15418-2|KS6A1_HUMAN	RPS6KA1	KS6A1_HUMAN Isoform 2 of Ribosomal protein S6 kinase alpha-1	27	5.33408	5.98242	6.04559	6.65943	6.32634	6.42328	6.59392	6.81501	6.92208	6.37927	6.79421	6.85302	5.8489	5.48582	5.90509	5.63154	6.00538	6.53964	6.73714	5.71784	1.08896	1.12185	0.952119	0.122955	0.165882	-0.0707859	0.0902154	0.0327739	0.0362527	0.0340208
sp|Q9Y285|SYFA_HUMAN	FARSA	SYFA_HUMAN Phenylalanine--tRNA ligase alpha subunit	34	5.41021	6.03551	5.87311	6.57389	6.43403	6.51455	6.55382	7.10356	6.79441	6.47202	6.74114	6.79582	5.9423	5.19021	5.94524	5.62019	5.97318	6.65149	6.70085	5.67449	1.11356	1.12182	0.949994	0.155178	0.165844	-0.0740097	0.0803875	0.0459261	0.0230807	0.0629261
sp|Q8IY45|AMN1_HUMAN	AMN1	AMN1_HUMAN Protein AMN1 homolog	4	5.63967	6.21762	5.92299	6.63964	6.40525	6.96446	6.46746	6.94781	6.84909	6.70097	7.14596	6.69855	5.40766	4.95259	5.50559	5.5347	6.10498	6.69625	6.84864	5.35013	1.09685	1.12181	0.876356	0.133366	0.165831	-0.190411	0.0700193	0.0449871	0.0307131	0.0505676
sp|O60749|SNX2_HUMAN	SNX2	SNX2_HUMAN Sorting nexin-2	27	5.24082	6.01092	5.84174	6.43197	6.2676	6.19641	6.80836	6.90445	6.49401	6.22051	6.92415	6.7516	5.85623	5.29321	6.582	6.17602	5.88136	6.54421	6.59757	5.97687	1.1127	1.12178	1.01624	0.154068	0.165784	0.0232385	0.0839775	0.0555894	0.046576	0.0910166
sp|Q13148|TADBP_HUMAN	TARDBP	TADBP_HUMAN TAR DNA-binding protein 43	20	5.33466	6.13504	6.02194	6.06015	6.4816	6.54133	6.93991	6.91562	6.70079	6.36222	6.7572	6.59943	6.04072	5.14864	6.15664	5.8041	5.88795	6.71962	6.60491	5.78753	1.14125	1.12177	0.982944	0.190614	0.165774	-0.0248183	0.0631523	0.0359824	0.0264144	0.0778367
sp|Q8NBU5|ATAD1_HUMAN	ATAD1	ATAD1_HUMAN ATPase family AAA domain-containing protein 1	12	5.52412	6.0913	6.00451	6.42446	6.69231	6.50924	6.79952	7.13978	6.87575	6.5388	6.91574	6.64127	5.6383	4.97318	5.69144	5.54029	6.0111	6.78521	6.74289	5.4608	1.12878	1.12174	0.908453	0.174766	0.165739	-0.138515	0.0618363	0.0390592	0.0270099	0.0606239
tr|B4DR80|B4DR80_HUMAN	STK24	B4DR80_HUMAN Serine/threonine-protein kinase 24 12 kDa subunit	7	5.27117	6.11529	6.0168	6.28098	5.94054	6.50432	6.76687	6.83173	6.42533	6.35723	6.8636	6.9192	6.11712	5.1107	6.1956	6.28351	5.92106	6.51086	6.64134	5.92673	1.09961	1.12165	1.00096	0.136994	0.165619	0.00138147	0.0754532	0.0623131	0.0438114	0.0925047
sp|Q96MV1|TMM56_HUMAN	TMEM56	TMM56_HUMAN Transmembrane protein 56	2	5.03787	5.72915	6.50529	5.93004	6.17643	6.00475	6.46142	7.01902	6.22618	6.70991	6.24111	6.84745	6.88055	6.15881	6.53821	5.53381	5.80059	6.41541	6.50616	6.27785	1.10599	1.12164	1.08228	0.145341	0.165608	0.11407	0.104401	0.0692556	0.0491387	0.0919111
sp|Q9Y2G5|OFUT2_HUMAN	POFUT2	OFUT2_HUMAN GDP-fucose protein O-fucosyltransferase 2	7	5.10398	5.7493	6.21778	6.73354	6.13529	6.34183	6.51709	7.31749	6.66444	6.20348	6.96937	6.85853	5.88381	5.11778	6.29342	5.89286	5.95115	6.57792	6.67395	5.79697	1.10532	1.12146	0.974092	0.144464	0.165373	-0.0378701	0.116485	0.0786186	0.0506478	0.0847729
sp|Q3B726|RPA43_HUMAN	TWISTNB	RPA43_HUMAN DNA-directed RNA polymerase I subunit RPA43	1	5.43963	5.87373	6.40213	6.43236	6.31786	6.55793	6.55961	7.12413	6.49306	6.38015	7.05898	7.14843	5.87816	4.84964	5.80711	5.67707	6.03696	6.63988	6.77015	5.553	1.09987	1.12145	0.919833	0.137335	0.165366	-0.120557	0.0784644	0.0515408	0.0575488	0.0857625
sp|Q9BTU6|P4K2A_HUMAN	PI4K2A	P4K2A_HUMAN Phosphatidylinositol 4-kinase type 2-alpha	16	5.23456	5.86217	5.98383	6.4571	6.18625	6.54123	7.01155	6.77394	6.54656	6.22645	6.96231	6.66096	5.86533	5.23889	6.5195	5.92936	5.88442	6.62824	6.59907	5.88827	1.12641	1.12145	1.00066	0.171727	0.165364	0.000944829	0.0855718	0.053061	0.0460778	0.0889166
tr|B7Z9C2|B7Z9C2_HUMAN	NAP1L1	B7Z9C2_HUMAN Nucleosome assembly protein 1-like 1	5	5.34246	5.78163	6.12755	6.64363	5.9796	6.01265	6.59745	6.95579	6.81436	6.21149	7.34226	6.42727	5.93367	5.88058	5.93219	6.01742	5.97382	6.38637	6.69885	5.94097	1.06906	1.12137	0.994501	0.0963435	0.165259	-0.00795587	0.0920852	0.0742147	0.07407	0.00953265
sp|Q8N392|RHG18_HUMAN	ARHGAP18	RHG18_HUMAN Rho GTPase-activating protein 18	32	5.23715	6.04234	5.94481	6.51442	6.22978	6.53101	6.9351	7.11229	6.58214	6.37736	6.89089	6.76464	5.92802	4.92437	6.16368	5.82201	5.93468	6.70205	6.65376	5.70952	1.1293	1.12117	0.96206	0.175431	0.164999	-0.0558008	0.0888615	0.0593655	0.0336119	0.0950275
sp|Q96RT7|GCP6_HUMAN	TUBGCP6	GCP6_HUMAN Gamma-tubulin complex component 6	1	5.01657	6.24312	6.21552	6.3109	6.40917	7.19562	6.96091	6.4895	6.98474	6.43507	7.17311	6.07477	4.91383	5.91485	5.98132	5.68099	5.94653	6.7638	6.66692	5.62275	1.13744	1.12115	0.945551	0.185787	0.164974	-0.0807722	0.104475	0.0557338	0.0755766	0.087119
sp|P03915|NU5M_HUMAN	MT-ND5	NU5M_HUMAN NADH-ubiquinone oxidoreductase chain 5	1	4.88249	6.10447	6.43651	6.94336	5.91892	6.24013	5.37988	6.99178	5.01143	6.76405	7.34075	8.19896	5.68129	6.00426	5.26015	6.84158	6.09171	6.13268	6.8288	5.94682	1.00673	1.121	0.976216	0.00967041	0.164785	-0.0347283	0.143941	0.10987	0.197311	0.112632
sp|Q96FW1|OTUB1_HUMAN	OTUB1	OTUB1_HUMAN Ubiquitin thioesterase OTUB1	22	5.26578	5.69678	6.31059	6.45247	6.18464	6.56502	6.97347	6.98126	6.34617	6.55645	6.79267	6.90092	5.78854	5.26951	6.0888	5.82694	5.9314	6.6761	6.64905	5.74345	1.12555	1.12099	0.968311	0.170631	0.164775	-0.0464569	0.0930275	0.0570654	0.0372848	0.0597154
sp|Q9H4Z3|PCIF1_HUMAN	PCIF1	PCIF1_HUMAN Phosphorylated CTD-interacting factor 1	6	5.1627	5.73683	6.29913	6.72992	6.04182	6.1807	6.45271	6.73871	6.43117	6.06657	7.46915	6.85597	6.13533	5.71008	6.04002	5.94918	5.98215	6.35349	6.70571	5.95865	1.06207	1.12095	0.996073	0.0868853	0.164728	-0.00567677	0.11384	0.0485319	0.08986	0.0305963
sp|Q14653|IRF3_HUMAN	IRF3	IRF3_HUMAN Interferon regulatory factor 3	5	5.28467	6.21632	6.16906	6.08035	6.23996	6.68036	6.62496	6.72756	6.65811	6.51103	6.85821	6.59506	5.84559	5.85781	6.06579	5.58516	5.9376	6.56821	6.6556	5.83859	1.10621	1.12092	0.983324	0.14562	0.164689	-0.0242605	0.0739222	0.0339231	0.0222218	0.0337176
sp|Q9Y2Z4|SYYM_HUMAN	YARS2	SYYM_HUMAN Tyrosine--tRNA ligase, mitochondrial	14	5.40572	6.23605	5.95063	6.44223	6.3062	6.90615	6.69702	6.78922	6.84651	6.52706	6.86665	6.70028	5.84094	5.09675	5.8511	5.53749	6.00866	6.67465	6.73513	5.58157	1.11084	1.1209	0.928921	0.151649	0.164662	-0.106372	0.074836	0.0389701	0.0233521	0.0635043
sp|Q96FH0|MF2NB_HUMAN	MEF2BNB	MF2NB_HUMAN Protein MEF2BNB	1	5.85141	3.44994	4.20861	7.0737	5.31235	8.45024	9.34099	3.26499	3.21961	6.67484	5.88416	7.29159	6.29716	9.75877	6.89145	7.03019	5.14591	6.59214	5.76755	7.49439	1.28104	1.1208	1.45638	0.35732	0.164531	0.542384	0.316721	0.426519	0.310989	0.205848
sp|Q14149|MORC3_HUMAN	MORC3	MORC3_HUMAN MORC family CW-type zinc finger protein 3	26	5.4352	6.08004	5.9747	6.30308	6.13842	6.41213	6.68886	6.7605	6.4836	6.401	6.91438	6.8678	6.07132	5.26706	6.17162	6.03028	5.94825	6.49998	6.66669	5.88507	1.09275	1.12078	0.989378	0.127968	0.164505	-0.0154069	0.061937	0.0436944	0.0392976	0.0707319
sp|Q9BTE6|AASD1_HUMAN	AARSD1	AASD1_HUMAN Alanyl-tRNA editing protein Aarsd1	20	5.1544	5.78507	5.98299	6.39476	6.48964	7.05181	6.9302	6.71553	6.21035	6.58388	6.67963	6.65589	5.94997	5.15538	6.48708	5.77343	5.8293	6.7968	6.53244	5.84147	1.16597	1.12062	1.00209	0.221531	0.164298	0.00300634	0.0886315	0.0364151	0.0334562	0.0939693
sp|Q9Y6Y8|S23IP_HUMAN	SEC23IP	S23IP_HUMAN SEC23-interacting protein	34	5.20372	5.94344	6.17011	6.58711	6.2231	6.39876	6.62168	6.98271	6.57703	6.421	6.86223	6.92408	5.8908	5.12248	6.18154	5.89021	5.97609	6.55656	6.69609	5.77126	1.09713	1.12048	0.965724	0.133737	0.164115	-0.0503174	0.097025	0.0499633	0.0354908	0.0786235
sp|O94925-3|GLSK_HUMAN	GLS	GLSK_HUMAN Isoform 3 of Glutaminase kidney isoform, mitochondrial	3	5.26344	5.93001	6.05568	6.1456	6.47522	7.65057	7.065	6.91406	6.50279	6.89266	6.38672	6.43077	5.85082	5.08547	5.83487	5.51634	5.84868	7.02621	6.55323	5.57187	1.20133	1.12046	0.952672	0.264636	0.164096	-0.0699488	0.0684008	0.0691163	0.0352933	0.0644314
sp|P54886|P5CS_HUMAN	ALDH18A1	P5CS_HUMAN Delta-1-pyrroline-5-carboxylate synthase	44	5.26028	6.04726	5.91336	6.36848	6.43347	6.78335	6.89853	6.93091	6.55585	6.47781	6.71656	6.67566	5.8231	5.2014	6.16549	5.74848	5.89734	6.76157	6.60647	5.73462	1.14654	1.12024	0.972407	0.197292	0.163814	-0.0403683	0.078963	0.0336774	0.0165867	0.0696059
sp|Q9Y4E6|WDR7_HUMAN	WDR7	WDR7_HUMAN WD repeat-containing protein 7	3	5.94176	5.9335	6.12018	5.89866	6.3059	6.85303	6.79958	6.41341	6.44332	6.39761	6.85531	7.06839	6.00672	5.77192	5.78414	5.40655	5.97353	6.59298	6.69116	5.74233	1.1037	1.12014	0.961297	0.142348	0.163673	-0.0569457	0.0166632	0.0415355	0.0485692	0.0432771
sp|Q9H4A5|GLP3L_HUMAN	GOLPH3L	GLP3L_HUMAN Golgi phosphoprotein 3-like	4	5.63474	6.0242	5.84511	6.59655	6.19751	6.36143	6.75445	6.96853	6.65212	6.57051	6.94888	6.82211	5.77243	5.23832	6.01434	5.59877	6.02515	6.57048	6.7484	5.65597	1.09051	1.12004	0.938726	0.125002	0.163549	-0.091224	0.068521	0.0538163	0.0251679	0.0577166
sp|Q4G176|ACSF3_HUMAN	ACSF3	ACSF3_HUMAN Acyl-CoA synthetase family member 3, mitochondrial	11	5.38829	6.22066	5.76064	6.52046	6.45179	6.75498	6.90063	6.89455	6.65187	6.36573	6.76797	6.96918	5.53876	5.25799	5.91538	5.64113	5.97251	6.75049	6.68869	5.58831	1.13026	1.11991	0.935672	0.176654	0.163385	-0.0959246	0.0836068	0.0311367	0.0376861	0.0486049
sp|Q9BTV5|FSD1_HUMAN	FSD1	FSD1_HUMAN Fibronectin type III and SPRY domain-containing protein 1	5	5.21499	5.98265	5.89727	6.28817	6.35765	6.50319	6.58647	7.00613	6.47232	6.55404	6.57418	6.58317	6.01492	5.59293	6.21638	6.15554	5.84577	6.61336	6.54593	5.99494	1.13131	1.11977	1.02552	0.17799	0.163205	0.0363528	0.0774518	0.0420963	0.00772396	0.0468685
sp|Q9UI09|NDUAC_HUMAN	NDUFA12	NDUAC_HUMAN NADH dehydrogenase [ubiquinone] 1 alpha subcomplex subunit 12	10	5.57886	6.02424	5.95177	6.39071	6.38795	6.64551	6.65221	6.92592	6.92315	6.48403	6.85845	6.54578	5.5444	5.25944	5.91451	5.91306	5.98639	6.6529	6.70285	5.65785	1.11134	1.11968	0.945118	0.152295	0.163088	-0.0814329	0.0555859	0.033022	0.0328328	0.0561342
sp|P43686|PRS6B_HUMAN	PSMC4	PRS6B_HUMAN 26S protease regulatory subunit 6B	45	5.35467	6.0781	5.83605	6.38081	6.52704	6.79285	6.62916	6.83491	6.78282	6.5569	6.6088	6.53026	6.08748	5.34939	5.94343	5.70735	5.91241	6.69599	6.6197	5.77191	1.13253	1.11963	0.976237	0.179552	0.163019	-0.0346963	0.0733197	0.0214159	0.017151	0.055845
sp|P49590|SYHM_HUMAN	HARS2	SYHM_HUMAN Probable histidine--tRNA ligase, mitochondrial	21	5.07652	5.85536	5.96345	6.2693	6.33225	6.08296	6.45607	6.50766	6.39186	6.01686	6.77332	6.75349	6.54954	5.69396	6.85848	6.41891	5.79116	6.34474	6.48388	6.38022	1.09559	1.11962	1.10172	0.131708	0.163006	0.139755	0.08766	0.0298522	0.0551095	0.0773074
sp|P51570|GALK1_HUMAN	GALK1	GALK1_HUMAN Galactokinase	5	5.66517	5.91835	5.10715	6.19821	5.87984	8.29777	6.85997	5.78663	5.88179	6.76911	6.20439	6.77113	6.46309	6.14373	6.46736	5.58632	5.72222	6.70605	6.4066	6.16512	1.17193	1.1196	1.0774	0.228889	0.162985	0.107555	0.081132	0.174012	0.0686679	0.0672442
sp|Q9BRQ8|AIFM2_HUMAN	AIFM2	AIFM2_HUMAN Apoptosis-inducing factor 2	15	5.30109	6.16374	5.90876	6.47576	6.57535	6.59454	6.49358	6.69983	6.61656	6.60635	6.69655	6.7811	5.9818	5.49617	5.98014	5.62867	5.96234	6.59083	6.67514	5.77169	1.10541	1.11955	0.968026	0.144581	0.16292	-0.046883	0.0835396	0.012872	0.0121858	0.0429044
sp|Q9BXJ8|T120A_HUMAN	TMEM120A	T120A_HUMAN Transmembrane protein 120A	1	5.74213	6.6428	4.96485	8.41082	7.29013	5.1595	5.5535	5.99547	7.17075	7.41986	6.95441	7.29523	4.61515	6.33122	5.59	4.86419	6.44015	5.99965	7.21006	5.35014	0.931601	1.11955	0.830748	-0.102216	0.162917	-0.267518	0.230108	0.154277	0.0275269	0.144636
sp|Q9Y297|FBW1A_HUMAN	BTRC	FBW1A_HUMAN F-box/WD repeat-containing protein 1A	7	5.30448	6.06838	6.15742	6.40976	6.19576	6.42994	6.78471	6.79011	6.51667	6.54449	6.78791	6.95226	5.89539	5.21638	5.8953	6.05105	5.98501	6.55013	6.70033	5.76453	1.09442	1.11952	0.963161	0.13017	0.162879	-0.0541507	0.0795602	0.0443039	0.0309671	0.0646596
sp|O75787|RENR_HUMAN	ATP6AP2	RENR_HUMAN Renin receptor	7	5.36296	5.92553	6.22672	6.5856	6.01685	6.57837	7.02509	6.48657	6.60751	6.34437	6.87133	7.15793	5.62904	5.04235	6.40861	5.73117	6.0252	6.52672	6.74528	5.70279	1.08324	1.11951	0.94649	0.115348	0.16287	-0.0793412	0.0858751	0.0633348	0.0517735	0.0981875
sp|Q8WUX9|CHMP7_HUMAN	CHMP7	CHMP7_HUMAN Charged multivesicular body protein 7	13	5.22583	5.9202	6.06741	6.22752	6.16867	6.34776	6.58967	6.83629	6.07838	6.43741	6.86899	6.85703	6.26597	5.27746	6.67539	6.15602	5.86024	6.4856	6.56045	6.09371	1.10671	1.11949	1.03984	0.14628	0.162836	0.0563611	0.0752814	0.0447993	0.0577546	0.0965366
sp|P55211|CASP9_HUMAN	CASP9	CASP9_HUMAN Caspase-9	1	5.97239	5.79925	5.97843	6.95057	5.49842	6.35438	6.82863	6.87833	6.80886	7.01339	7.02472	6.80372	6.20565	4.80978	5.55366	5.51983	6.17516	6.38994	6.91267	5.52223	1.03478	1.11943	0.894265	0.0493259	0.162767	-0.161226	0.084787	0.100086	0.0177854	0.103269
sp|Q9HA92|RSAD1_HUMAN	RSAD1	RSAD1_HUMAN Radical S-adenosyl methionine domain-containing protein 1, mitochondrial	1	5.51991	6.11397	6.07434	5.79316	7.07924	7.8731	7.0787	6.26956	6.58724	6.86088	7.01754	5.8424	5.24873	4.47961	6.03305	6.1286	5.87535	7.07515	6.57701	5.4725	1.20421	1.11943	0.931434	0.268087	0.162759	-0.102474	0.047089	0.0925291	0.0792193	0.140778
sp|Q9P035|HACD3_HUMAN	PTPLAD1	HACD3_HUMAN Very-long-chain (3R)-3-hydroxyacyl-[acyl-carrier protein] dehydratase 3	11	5.54404	5.84773	6.02319	6.52778	6.1841	6.66452	6.48713	6.92351	6.6276	6.58357	6.83937	6.75102	5.58836	5.43397	6.13108	5.84304	5.98569	6.56482	6.70039	5.74911	1.09675	1.1194	0.960477	0.133238	0.162729	-0.0581771	0.0688392	0.0473263	0.01741	0.0531279
sp|O96000|NDUBA_HUMAN	NDUFB10	NDUBA_HUMAN NADH dehydrogenase [ubiquinone] 1 beta subcomplex subunit 10	13	5.40753	6.18855	6.09393	6.25542	6.33341	6.2417	6.80464	6.54537	6.54876	6.41088	7.16665	6.67725	5.90412	5.32791	6.47992	5.61396	5.98636	6.48128	6.70089	5.83148	1.08268	1.11936	0.974128	0.1146	0.162673	-0.037817	0.0654039	0.0386172	0.0490993	0.0843962
sp|O00541|PESC_HUMAN	PES1	PESC_HUMAN Pescadillo homolog	18	5.11166	5.86721	6.064	6.5319	6.19171	6.36756	6.81608	6.97724	6.3548	6.179	6.96666	6.88749	5.79829	5.1465	6.74826	5.99162	5.89369	6.58815	6.59699	5.92117	1.11783	1.11933	1.00466	0.160701	0.162636	0.00670988	0.100312	0.0560566	0.0589958	0.111356
sp|O75663|TIPRL_HUMAN	TIPRL	TIPRL_HUMAN TIP41-like protein	11	5.41496	5.88848	6.01941	6.26934	6.12219	6.31875	6.77416	6.92813	6.5842	6.32351	6.73882	6.75958	6.06819	5.28087	6.47433	6.03506	5.89805	6.53581	6.60153	5.96461	1.10813	1.11927	1.01129	0.148128	0.162562	0.016191	0.0608211	0.0578535	0.0304752	0.083436
sp|Q9UK39|NOCT_HUMAN	CCRN4L	NOCT_HUMAN Nocturnin	6	5.6958	6.48997	5.61305	6.48935	6.34778	6.6147	6.78001	6.77466	6.52922	7.00437	7.04357	6.60782	5.60511	5.30017	5.81574	5.28869	6.07204	6.62929	6.79624	5.50243	1.09177	1.11927	0.906191	0.126672	0.162556	-0.142114	0.0796116	0.0305824	0.0390492	0.0463699
sp|P18440|ARY1_HUMAN	NAT1	ARY1_HUMAN Arylamine N-acetyltransferase 1	5	5.20108	6.19639	6.20041	6.53005	6.0929	6.56713	6.54154	6.87715	6.48691	6.27252	7.01664	7.22702	5.25208	5.20208	6.37287	5.96324	6.03198	6.51968	6.75077	5.69757	1.08085	1.11916	0.94456	0.112169	0.16242	-0.0822861	0.0954209	0.0495161	0.0660166	0.0998312
sp|Q9BZ23|PANK2_HUMAN	PANK2	PANK2_HUMAN Pantothenate kinase 2, mitochondrial	5	5.34212	6.04404	5.75295	6.41423	6.41366	6.38634	6.76708	6.87313	6.62682	6.37045	6.59691	6.76536	5.55042	5.46898	6.67429	5.95322	5.88834	6.61005	6.58989	5.91173	1.12257	1.11914	1.00397	0.166802	0.162394	0.00572002	0.0770481	0.0373119	0.0248355	0.0931528
sp|P41240|CSK_HUMAN	CSK	CSK_HUMAN Tyrosine-protein kinase CSK	23	5.34072	5.95026	6.01267	6.50191	6.26096	6.65904	6.79376	7.0175	6.56122	6.48685	6.71099	6.8816	5.82697	5.12406	6.01038	5.86111	5.95139	6.68281	6.66016	5.70563	1.1229	1.11909	0.958705	0.167229	0.162331	-0.0608405	0.0799824	0.0475438	0.026214	0.0693716
sp|Q9P215|POGK_HUMAN	POGK	POGK_HUMAN Pogo transposable element with KRAB domain	4	5.19502	6.08726	6.27083	6.61	6.26495	6.43248	6.58957	7.16535	6.52261	6.26793	7.26176	6.98708	5.55818	5.0299	6.22984	5.52723	6.04078	6.61309	6.75984	5.58629	1.09474	1.11904	0.924763	0.13059	0.162256	-0.112844	0.0999852	0.0591717	0.0662574	0.0881827
sp|Q9HB20|PKHA3_HUMAN	PLEKHA3	PKHA3_HUMAN Pleckstrin homology domain-containing family A member 3	2	5.32535	5.45818	6.5216	6.03908	6.44493	6.68081	6.2802	5.97569	6.12632	6.42791	6.69463	6.87215	6.17872	6.48848	6.12744	6.35849	5.83605	6.34541	6.53025	6.28828	1.08728	1.11895	1.07749	0.12072	0.162146	0.107673	0.0946201	0.0466918	0.0498213	0.0264325
sp|Q9Y606|TRUA_HUMAN	PUS1	TRUA_HUMAN tRNA pseudouridine synthase A, mitochondrial	21	5.30849	5.95184	6.03847	6.66186	6.36622	6.34629	6.82621	7.03655	6.64298	6.349	6.98668	6.83133	5.7749	5.21538	6.03877	5.62503	5.99017	6.64382	6.7025	5.66352	1.10912	1.11892	0.94547	0.149417	0.162103	-0.0808967	0.0924301	0.0516373	0.0409376	0.0607842
sp|O60725|ICMT_HUMAN	ICMT	ICMT_HUMAN Protein-S-isoprenylcysteine O-methyltransferase	1	5.24003	6.37661	5.75529	6.74189	6.58939	6.90757	5.98238	6.89568	6.79184	6.49186	7.3822	6.31428	5.33224	5.00866	6.04209	6.148	6.02845	6.59375	6.74505	5.63275	1.09377	1.11887	0.93436	0.129312	0.16204	-0.0979495	0.1103	0.0657248	0.0694236	0.09793
sp|Q9UKI2|BORG2_HUMAN	CDC42EP3	BORG2_HUMAN Cdc42 effector protein 3	3	5.19049	5.71505	6.48481	5.81702	6.30046	5.77503	6.51111	6.25489	6.05509	6.64103	6.90139	6.36819	6.32347	6.89207	6.45224	6.31766	5.80184	6.21037	6.49142	6.49636	1.07041	1.11886	1.11971	0.0981687	0.162024	0.16312	0.0916349	0.0500689	0.0559709	0.0417189
sp|Q9BT22|ALG1_HUMAN	ALG1	ALG1_HUMAN Chitobiosyldiphosphodolichol beta-mannosyltransferase	6	5.3758	5.93956	6.18083	6.85003	6.14209	6.59389	6.88178	7.03183	6.67402	6.55129	6.92668	7.08687	5.73859	5.06477	5.67037	5.29159	6.08655	6.6624	6.80972	5.44133	1.09461	1.11881	0.893992	0.130416	0.161969	-0.161667	0.100322	0.0587758	0.0355375	0.0586023
sp|P22102|PUR2_HUMAN	GART	PUR2_HUMAN Trifunctional purine biosynthetic protein adenosine-3	88	5.34125	5.99908	5.84568	6.59623	6.37385	6.52091	6.71872	7.00644	6.67098	6.40018	6.84194	6.68773	5.88298	5.32165	6.09116	5.70123	5.94556	6.65498	6.65021	5.74925	1.11932	1.11852	0.966983	0.162622	0.161587	-0.0484377	0.0869305	0.0411143	0.0276065	0.0568012
sp|Q9ULC5-3|ACSL5_HUMAN	ACSL5	ACSL5_HUMAN Isoform 2 of Long-chain-fatty-acid--CoA ligase 5	46	5.44504	6.05279	5.88781	6.48162	6.56436	6.93241	6.66837	6.93714	6.65212	6.57402	6.75031	6.71889	5.72419	5.13072	5.77906	5.70114	5.96682	6.77557	6.67384	5.58378	1.13554	1.11849	0.935805	0.183381	0.161555	-0.0957196	0.0718184	0.0278477	0.0117069	0.0544079
sp|O75044|SRGP2_HUMAN	SRGAP2	SRGP2_HUMAN SLIT-ROBO Rho GTPase-activating protein 2	15	5.61493	5.91568	6.15144	6.37418	6.40466	6.45159	6.53098	6.56642	6.73151	6.60258	6.98729	6.58523	5.89922	5.56127	5.8658	5.75721	6.01406	6.48841	6.72665	5.77088	1.07887	1.11849	0.959564	0.109527	0.16155	-0.0595486	0.054097	0.0113491	0.0275928	0.0263946
sp|P49327|FAS_HUMAN	FASN	FAS_HUMAN Fatty acid synthase	359	5.32502	6.03634	5.95894	6.38577	6.46599	6.81401	6.75864	6.91231	6.60356	6.48252	6.80274	6.62515	5.79941	5.22022	6.16445	5.64495	5.92652	6.73774	6.62849	5.70726	1.13688	1.11845	0.963004	0.18508	0.161496	-0.054387	0.074563	0.0284942	0.0199199	0.0685064
sp|Q9H9Y4|GPN2_HUMAN	GPN2	GPN2_HUMAN GPN-loop GTPase 2	1	5.13024	5.52595	6.64634	7.08845	6.00706	6.39203	6.7823	6.10337	6.25338	6.74092	6.54589	7.73979	5.88238	5.0698	6.23115	5.86093	6.09774	6.32119	6.81999	5.76107	1.03664	1.11845	0.944786	0.0519204	0.161495	-0.0819403	0.151062	0.0550872	0.0945895	0.0852435
sp|Q9H0P0|5NT3A_HUMAN	NT5C3A	5NT3A_HUMAN Cytosolic 5'-nucleotidase 3A	19	5.43702	5.85795	5.91258	6.21519	6.22093	6.27271	6.74484	7.05732	6.41722	6.31419	6.74789	6.71718	5.97561	5.17779	6.67888	6.25271	5.85568	6.57395	6.54912	6.02125	1.12266	1.11842	1.02827	0.166923	0.161463	0.0402245	0.0546981	0.0607332	0.0330257	0.105018
sp|P15882|CHIN_HUMAN	CHN1	CHIN_HUMAN N-chimaerin	3	5.6946	5.85205	6.14724	6.2753	6.00157	6.57056	7.1692	6.6267	7.0047	6.55797	6.67071	6.57353	5.87956	5.41007	5.63875	5.92749	5.9923	6.59201	6.70173	5.71397	1.10008	1.11839	0.953552	0.137609	0.161424	-0.0686164	0.0444032	0.0724051	0.0310443	0.0417859
sp|Q58FF6|H90B4_HUMAN	HSP90AB4P	H90B4_HUMAN Putative heat shock protein HSP 90-beta 4	1	5.36716	5.68504	6.78389	5.54283	6.69191	7.14786	6.45843	6.1684	6.60642	6.84342	6.14036	6.55373	6.74114	6.05763	5.79865	5.41314	5.84473	6.61665	6.53598	6.00264	1.13207	1.11827	1.02702	0.178965	0.161268	0.0384608	0.109408	0.0625464	0.0447211	0.0931299
sp|Q8IYB7|DI3L2_HUMAN	DIS3L2	DI3L2_HUMAN DIS3-like exonuclease 2	32	5.45799	6.0877	5.99731	6.58288	6.28917	6.50288	6.67903	7.25153	6.69908	6.42029	6.93453	6.92295	5.74668	5.14804	5.76706	5.51289	6.03147	6.68065	6.74421	5.54367	1.10763	1.11817	0.919124	0.147479	0.16114	-0.121669	0.0764143	0.0617634	0.0358252	0.0519256
sp|Q9NUQ7|UFSP2_HUMAN	UFSP2	UFSP2_HUMAN Ufm1-specific protease 2	13	5.41577	5.90616	5.83679	6.33031	6.28754	6.38061	6.55856	6.65257	6.42281	6.31844	6.80848	6.71269	6.27658	5.67913	6.2155	6.19806	5.87226	6.46982	6.5656	6.09232	1.10176	1.11807	1.03747	0.13981	0.161013	0.0530759	0.063763	0.0256248	0.0354047	0.0455505
sp|Q9Y3C4-3|TPRKB_HUMAN	TPRKB	TPRKB_HUMAN Isoform 3 of EKC/KEOPS complex subunit TPRKB	4	5.58464	5.94361	6.00396	6.06218	6.17339	6.28462	7.00645	6.9404	6.06319	6.68521	6.88824	6.74349	6.09024	5.5031	6.29274	5.73452	5.8986	6.60122	6.59503	5.90515	1.11912	1.11807	1.00111	0.16236	0.161008	0.00160174	0.0364205	0.0655976	0.0552978	0.0598914
sp|Q9H6U8-3|ALG9_HUMAN	ALG9	ALG9_HUMAN Isoform 3 of Alpha-1,2-mannosyltransferase ALG9	4	5.56734	5.27701	6.07365	6.94637	6.11587	6.36184	6.73114	7.24823	6.85208	5.99772	6.60946	7.22253	6.00501	5.2524	6.07138	5.66797	5.96609	6.61427	6.67045	5.74919	1.10864	1.11806	0.963644	0.148796	0.160997	-0.0534276	0.122651	0.0744612	0.0771282	0.0652863
sp|Q969S9|RRF2M_HUMAN	GFM2	RRF2M_HUMAN Ribosome-releasing factor 2, mitochondrial	16	5.24563	5.74681	6.11896	6.67045	6.14808	6.4271	6.65654	6.96948	6.5591	6.21684	6.78979	7.02269	5.9173	5.26847	6.10859	6.13417	5.94546	6.5503	6.64711	5.85713	1.10173	1.11801	0.985143	0.139772	0.160937	-0.0215945	0.101148	0.0531745	0.0516999	0.0690093
sp|P49755|TMEDA_HUMAN	TMED10	TMEDA_HUMAN Transmembrane emp24 domain-containing protein 10	30	5.35801	6.01125	5.98403	6.231	6.26213	6.30328	6.64426	6.77551	6.65132	6.40999	6.70293	6.60092	6.0842	5.4784	6.5198	5.98297	5.89607	6.49629	6.59129	6.01634	1.1018	1.11791	1.0204	0.139863	0.160807	0.0291324	0.0636631	0.0389367	0.0193954	0.071076
sp|O95749|GGPPS_HUMAN	GGPS1	GGPPS_HUMAN Geranylgeranyl pyrophosphate synthase	2	4.9661	5.33121	5.93468	7.02832	6.44323	5.98862	7.0151	6.25792	6.37092	6.08989	7.09926	6.44022	6.51156	5.36858	6.20546	6.94893	5.81508	6.42622	6.50007	6.25863	1.1051	1.1178	1.07628	0.144171	0.160657	0.106049	0.155125	0.0676445	0.0657247	0.106606
sp|P54646|AAPK2_HUMAN	PRKAA2	AAPK2_HUMAN 5'-AMP-activated protein kinase catalytic subunit alpha-2	1	6.68557	5.07186	5.65519	5.67282	7.59324	5.86457	5.98932	5.91118	4.73496	5.53134	6.81805	8.71877	6.45084	6.96633	6.99682	5.33913	5.77136	6.33958	6.45078	6.43828	1.09845	1.11772	1.11556	0.135475	0.160562	0.157764	0.116159	0.132084	0.269516	0.120281
sp|Q9NR80|ARHG4_HUMAN	ARHGEF4	ARHG4_HUMAN Rho guanine nucleotide exchange factor 4	1	6.00019	5.96101	6.61266	5.91789	6.30217	7.31796	6.25813	6.06282	7.41426	6.76537	6.63214	6.5623	5.19071	5.61583	5.84911	5.53745	6.12294	6.48527	6.84352	5.54828	1.05918	1.11769	0.906146	0.0829427	0.160514	-0.142185	0.0536029	0.0870877	0.0569456	0.0491437
tr|K7ES63|K7ES63_HUMAN	TUBB6	K7ES63_HUMAN Tubulin beta-6 chain (Fragment)	2	5.79636	5.92096	6.2728	6.78124	5.84002	6.14962	7.22122	7.25123	7.17089	6.22476	6.79662	7.49381	5.62825	4.95029	5.17809	5.32383	6.19284	6.61552	6.92152	5.27012	1.06825	1.11766	0.851001	0.0952539	0.160488	-0.232767	0.0712284	0.110027	0.0787267	0.0538815
sp|Q9NX02|NALP2_HUMAN	NLRP2	NALP2_HUMAN NACHT, LRR and PYD domains-containing protein 2	37	5.31274	6.25979	6.11342	6.50557	6.43793	6.74522	6.71252	7.14472	6.76822	6.52136	6.94129	6.80308	5.57779	5.01421	5.56578	5.57635	6.04788	6.7601	6.75849	5.43353	1.11776	1.1175	0.898419	0.160615	0.160271	-0.154539	0.0853375	0.043061	0.0258728	0.0514582
sp|Q9NZR1|TMOD2_HUMAN	TMOD2	TMOD2_HUMAN Tropomodulin-2	1	6.11612	7.43206	4.92052	5.65607	7.05354	4.82592	5.80987	6.36933	8.37271	5.53498	6.01497	7.03635	5.04781	5.89625	7.89881	6.01468	6.03119	6.01466	6.73975	6.21439	0.99726	1.11748	1.03037	-0.0039589	0.160252	0.0431689	0.175052	0.156559	0.186331	0.193531
sp|Q8N9Z2|CC71L_HUMAN	CCDC71L	CC71L_HUMAN Coiled-coil domain-containing protein 71L	1	6.63694	6.02809	5.78582	5.88295	5.98055	6.52614	6.2944	6.28962	6.44974	6.49626	7.80736	6.43407	5.38317	6.33265	5.57224	6.1	6.08345	6.27268	6.79686	5.84702	1.03111	1.11727	0.961135	0.0441917	0.159978	-0.0571894	0.062824	0.0356882	0.0991908	0.0758776
sp|Q86YS6|RAB43_HUMAN	RAB43	RAB43_HUMAN Ras-related protein Rab-43	2	6.26192	5.7337	5.60164	6.44177	6.01862	5.58601	6.00185	6.31962	6.76271	6.80138	6.79626	6.49602	6.03984	6.9873	6.05257	6.09878	6.00976	5.98153	6.71409	6.29462	0.995302	1.1172	1.0474	-0.00679343	0.159886	0.0668131	0.0674529	0.0503888	0.0218034	0.073472
sp|Q9BQT9-2|CSTN3_HUMAN	CLSTN3	CSTN3_HUMAN Isoform 2 of Calsyntenin-3	1	5.27529	6.29657	6.70865	6.43097	6.67273	5.50128	6.66619	6.11544	7.29197	7.0408	7.25749	6.01591	5.79266	5.71408	6.20471	5.01527	6.17787	6.23891	6.90154	5.68168	1.00988	1.11714	0.919683	0.0141845	0.159809	-0.120792	0.101282	0.0892479	0.0870525	0.086882
sp|Q96CU9|FXRD1_HUMAN	FOXRED1	FXRD1_HUMAN FAD-dependent oxidoreductase domain-containing protein 1	12	5.43629	6.17128	5.72643	6.36753	6.34612	7.17149	6.69263	6.69106	6.39959	6.52868	6.69123	6.85604	5.81007	5.34751	6.19254	5.57151	5.92538	6.72533	6.61888	5.73041	1.135	1.11704	0.967095	0.182696	0.15968	-0.0482706	0.0712525	0.0504313	0.029926	0.0630624
sp|O60826|CCD22_HUMAN	CCDC22	CCD22_HUMAN Coiled-coil domain-containing protein 22	11	5.38466	5.90337	6.19629	6.52439	6.27882	6.15822	6.83514	6.51531	6.44176	6.53604	7.04623	6.79452	5.98711	5.33932	6.12382	5.935	6.00218	6.44687	6.70464	5.84631	1.07409	1.11703	0.974032	0.103113	0.159673	-0.037959	0.0805633	0.0462747	0.0406002	0.0593959
sp|Q9BTE7|DCNL5_HUMAN	DCUN1D5	DCNL5_HUMAN DCN1-like protein 5	10	5.42891	5.90738	6.1059	6.72128	6.42079	6.37678	6.56647	6.69313	6.68389	6.54886	6.72834	7.02734	5.58461	5.51343	5.87787	5.81502	6.04087	6.51429	6.74711	5.69773	1.07837	1.11691	0.943198	0.108853	0.159513	-0.0843679	0.088606	0.0221318	0.0299105	0.0308965
tr|K7EM49|K7EM49_HUMAN	PGD	K7EM49_HUMAN 6-phosphogluconate dehydrogenase, decarboxylating (Fragment)	1	4.58627	4.93578	8.52289	5.66102	5.77552	6.26766	5.3895	4.63545	6.0725	6.489	6.56074	7.35516	6.40873	7.99418	6.42743	6.91815	5.92649	5.51703	6.61935	6.93712	0.930911	1.11691	1.17053	-0.103285	0.159512	0.227159	0.301675	0.124866	0.0809277	0.107123
sp|O00468|AGRIN_HUMAN	AGRN	AGRIN_HUMAN Agrin	5	5.37655	6.233	6.31177	6.14403	5.99808	5.85928	6.48047	6.45956	6.82257	6.44455	6.80739	6.80338	5.89209	6.25678	5.73573	6.37478	6.01634	6.19935	6.71947	6.06485	1.03042	1.11687	1.00806	0.0432309	0.159462	0.0115853	0.0718035	0.0512554	0.0273039	0.0495624
sp|Q13617-2|CUL2_HUMAN	CUL2	CUL2_HUMAN Isoform 2 of Cullin-2	25	5.33274	6.01746	6.04947	6.58572	6.45406	6.50945	6.60495	7.05841	6.78992	6.47308	6.77824	6.74643	5.88107	5.13088	5.88348	5.70465	5.99635	6.65672	6.69692	5.65002	1.11013	1.11683	0.942244	0.150727	0.159413	-0.085828	0.0856331	0.0413043	0.022451	0.0630227
sp|O95382|M3K6_HUMAN	MAP3K6	M3K6_HUMAN Mitogen-activated protein kinase kinase kinase 6	4	5.59354	5.61245	6.15877	6.54349	6.73847	6.7666	7.29019	7.17316	6.50708	6.89658	6.68229	6.61296	5.70501	4.78599	5.46684	5.46658	5.97706	6.9921	6.67473	5.35611	1.16982	1.11672	0.89611	0.22629	0.159272	-0.158252	0.0769057	0.0401827	0.0246476	0.073996
sp|P19174-2|PLCG1_HUMAN	PLCG1	PLCG1_HUMAN Isoform 2 of 1-phosphatidylinositol 4,5-bisphosphate phosphodiesterase gamma-1	20	5.28943	5.84435	6.07861	6.53219	6.20419	6.52246	6.67803	7.01964	6.76776	6.39718	6.72293	6.62574	5.93982	5.28337	6.04977	6.04453	5.93615	6.60608	6.6284	5.82937	1.11286	1.11662	0.982013	0.154268	0.159135	-0.0261857	0.0871134	0.0513129	0.024916	0.0630441
sp|P14868|SYDC_HUMAN	DARS	SYDC_HUMAN Aspartate--tRNA ligase, cytoplasmic	61	5.39504	6.24226	5.88303	6.48339	6.57158	6.73869	6.71086	7.13873	6.75367	6.54875	6.81155	6.68677	5.76268	5.07432	5.67382	5.52485	6.00093	6.78996	6.70019	5.50892	1.13149	1.11652	0.918011	0.178218	0.159015	-0.123417	0.0788695	0.0358959	0.0168802	0.0555274
sp|Q6DN03|H2B2C_HUMAN	HIST2H2BC	H2B2C_HUMAN Putative histone H2B type 2-C	1	6.49746	5.9557	5.31914	5.90084	6.33608	6.38069	6.70289	7.19957	6.66812	6.53786	6.74372	6.47869	6.13073	5.10578	6.47652	5.5662	5.91829	6.65481	6.6071	5.81981	1.12445	1.11639	0.98336	0.169218	0.158837	-0.0242077	0.0813929	0.0598437	0.0182612	0.104145
sp|Q5JUX0|SPIN3_HUMAN	SPIN3	SPIN3_HUMAN Spindlin-3	2	5.07572	5.73755	6.26224	6.66036	6.34894	5.92582	7.11981	6.82408	6.27779	6.59175	7.27528	6.3536	6.51816	5.43292	6.19661	5.39937	5.93397	6.55466	6.62461	5.88677	1.1046	1.11639	0.992045	0.143524	0.158837	-0.011522	0.115556	0.0802344	0.0685232	0.0949967
sp|Q969R8|ITFG2_HUMAN	ITFG2	ITFG2_HUMAN Integrin-alpha FG-GAP repeat-containing protein 2	1	5.40702	6.60578	5.64521	6.06408	6.13251	5.73061	6.81832	7.56293	6.36239	6.07235	6.8097	7.23516	6.75178	4.997	5.95201	5.85317	5.93052	6.56109	6.6199	5.88849	1.10633	1.11624	0.992913	0.145777	0.15865	-0.0102615	0.0886531	0.122666	0.0770598	0.121883
sp|Q9Y2Z9|COQ6_HUMAN	COQ6	COQ6_HUMAN Ubiquinone biosynthesis monooxygenase COQ6	5	5.3297	6.15098	5.86904	5.88852	7.05598	7.14578	6.34942	6.46029	6.12622	6.34028	6.12454	7.34839	6.00996	5.28835	6.90574	5.60683	5.80956	6.75287	6.48486	5.95272	1.16237	1.11624	1.02464	0.217071	0.158646	0.0351201	0.0593458	0.06013	0.0901383	0.117695
sp|P19474|RO52_HUMAN	TRIM21	RO52_HUMAN E3 ubiquitin-protein ligase TRIM21	5	5.39459	5.71732	5.96662	6.22442	6.06597	6.54121	6.78844	6.56657	6.14348	6.32846	6.98826	6.55029	6.56574	5.86888	6.411	5.87873	5.82574	6.49055	6.50262	6.18109	1.11412	1.11619	1.061	0.155899	0.158581	0.08542	0.0608044	0.0468461	0.0559735	0.0583104
sp|Q96FZ2|HMCES_HUMAN	HMCES	HMCES_HUMAN Embryonic stem cell-specific 5-hydroxymethylcytosine-binding protein	13	4.99701	5.66513	6.13951	6.70009	6.27525	6.30371	6.97077	6.7791	6.03363	6.42594	6.92708	6.8452	5.98204	5.39022	6.42929	6.13602	5.87544	6.58221	6.55796	5.98439	1.12029	1.11617	1.01854	0.163876	0.158552	0.0265091	0.122955	0.0527401	0.06294	0.0730911
sp|P12931-2|SRC_HUMAN	SRC	SRC_HUMAN Isoform 2 of Proto-oncogene tyrosine-protein kinase Src	9	5.50189	5.26712	6.34141	6.70554	5.97724	6.20914	6.64319	6.46968	6.14627	6.24684	7.19063	6.99841	5.99602	5.97908	6.30112	6.02642	5.95399	6.32481	6.64554	6.07566	1.06228	1.11615	1.02044	0.0871659	0.158529	0.0291843	0.11437	0.0462346	0.0791434	0.0249483
sp|Q9BVK2|ALG8_HUMAN	ALG8	ALG8_HUMAN Probable dolichyl pyrophosphate Glc1Man9GlcNAc2 alpha-1,3-glucosyltransferase	2	5.40153	6.252	5.92501	6.15905	6.3272	7.09505	6.90894	6.76003	6.67488	6.36251	6.53216	6.92481	5.80327	4.90938	5.89588	6.06829	5.9344	6.7728	6.62359	5.66921	1.14128	1.11614	0.955313	0.190652	0.158512	-0.0659551	0.0641941	0.048305	0.0359274	0.0914268
sp|Q7L2J0|MEPCE_HUMAN	MEPCE	MEPCE_HUMAN 7SK snRNA methylphosphate capping enzyme	17	5.22946	5.88491	5.99434	6.3821	6.26072	6.54238	6.56965	6.66219	6.44798	6.46812	6.57184	6.73073	6.13654	5.7602	6.43227	5.92655	5.8727	6.50873	6.55467	6.06389	1.1083	1.11612	1.03256	0.148353	0.158498	0.046219	0.081556	0.0265968	0.0197284	0.0478024
sp|P30038|AL4A1_HUMAN	ALDH4A1	AL4A1_HUMAN Delta-1-pyrroline-5-carboxylate dehydrogenase, mitochondrial	8	5.59666	6.1166	6.0462	6.39324	6.31882	6.90299	6.53599	6.6354	6.66063	6.66915	6.87489	6.74929	5.64748	5.34188	6.10196	5.40883	6.03817	6.5983	6.73849	5.62504	1.09276	1.11598	0.931579	0.127982	0.158313	-0.10225	0.0546959	0.0367295	0.0147388	0.0611443
sp|Q01415|GALK2_HUMAN	GALK2	GALK2_HUMAN N-acetylgalactosamine kinase	6	5.21558	5.79761	6.31502	6.38929	6.39149	6.39691	6.71169	6.65605	6.77148	6.26953	6.51161	6.90944	5.72808	5.96818	5.98955	5.97847	5.92937	6.53904	6.61552	5.91607	1.10282	1.11572	0.997756	0.141198	0.157973	-0.00324092	0.0917105	0.0258128	0.0428629	0.0212354
sp|O95759|TBCD8_HUMAN	TBC1D8	TBCD8_HUMAN TBC1 domain family member 8	7	4.99633	6.61878	6.09414	6.12389	6.45303	7.44508	7.2997	6.53614	6.68582	7.0312	6.18426	6.68938	5.64325	5.25241	5.76119	5.1854	5.95829	6.93349	6.64766	5.46056	1.16367	1.1157	0.916465	0.218684	0.157951	-0.125848	0.114959	0.0737567	0.0524735	0.0520979
sp|Q13751|LAMB3_HUMAN	LAMB3	LAMB3_HUMAN Laminin subunit beta-3	3	5.00612	5.40164	6.69882	6.55975	6.16516	5.76747	6.44272	6.94345	6.50383	6.67588	6.96947	6.25425	6.25715	5.90263	5.96951	6.48215	5.91658	6.3297	6.60086	6.15286	1.06982	1.11565	1.03993	0.097373	0.157889	0.0564931	0.14207	0.078073	0.0455373	0.0435639
sp|P07814|SYEP_HUMAN	EPRS	SYEP_HUMAN Bifunctional glutamate/proline--tRNA ligase	125	5.35753	6.17081	6.05913	6.58833	6.44911	6.74947	6.75539	7.14631	6.8169	6.53952	6.85192	6.76209	5.64134	4.89097	5.6817	5.53948	6.04395	6.77507	6.74261	5.43837	1.12097	1.1156	0.899804	0.164744	0.157815	-0.152317	0.0845734	0.0421898	0.0208151	0.068
sp|O75323|NIPS2_HUMAN	GBAS	NIPS2_HUMAN Protein NipSnap homolog 2	9	4.95476	5.78987	6.44906	6.96891	5.8777	6.2778	7.05858	7.50902	6.16751	5.94652	7.42038	7.4171	5.07575	4.25236	6.65602	6.17867	6.04065	6.68077	6.73788	5.5407	1.10597	1.11542	0.917236	0.145312	0.15759	-0.124636	0.144018	0.110538	0.117448	0.195692
sp|Q14204|DYHC1_HUMAN	DYNC1H1	DYHC1_HUMAN Cytoplasmic dynein 1 heavy chain 1	237	5.57848	6.19549	5.81164	6.42421	6.53615	6.99958	6.72562	7.02616	6.82519	6.58387	6.67221	6.69841	5.67511	5.05785	5.74166	5.44835	6.00245	6.82188	6.69492	5.48074	1.13651	1.11536	0.913083	0.184616	0.157514	-0.131181	0.0631688	0.0342959	0.0148944	0.0563104
sp|Q5GLZ8|HERC4_HUMAN	HERC4	HERC4_HUMAN Probable E3 ubiquitin-protein ligase HERC4	28	5.32224	5.79425	6.19484	6.38378	6.16254	6.45613	6.67407	6.68111	6.47579	6.41343	6.85008	6.6886	5.86854	5.62517	6.51914	5.8903	5.92378	6.49346	6.60698	5.97579	1.09617	1.11533	1.00878	0.132471	0.157472	0.0126114	0.0794012	0.0375895	0.0303255	0.0638664
sp|Q9Y4K3|TRAF6_HUMAN	TRAF6	TRAF6_HUMAN TNF receptor-associated factor 6	7	5.67903	5.45628	6.36363	6.49793	6.10309	6.01228	6.30356	6.43609	6.45144	6.75168	6.55406	7.00702	6.19628	5.69077	6.06695	6.42993	5.99922	6.21375	6.69105	6.09598	1.03576	1.11532	1.01613	0.050691	0.157458	0.0230844	0.08493	0.0308635	0.0365771	0.0507048
sp|Q9Y4K4|M4K5_HUMAN	MAP4K5	M4K5_HUMAN Mitogen-activated protein kinase kinase kinase kinase 5	6	5.88701	6.22126	5.94154	6.53271	6.18856	6.55457	6.33593	6.61271	6.8428	6.61478	7.11121	6.84849	6.10867	5.06436	5.64314	5.49224	6.14563	6.42294	6.85432	5.5771	1.04512	1.11532	0.907491	0.0636735	0.157453	-0.140045	0.0482778	0.0305944	0.0296058	0.0772628
sp|O75694|NU155_HUMAN	NUP155	NU155_HUMAN Nuclear pore complex protein Nup155	36	5.31327	6.01632	6.05133	6.7719	6.38053	6.8733	6.65944	7.12577	6.76779	6.44575	6.92829	6.79497	5.79579	5.10759	5.62926	5.33868	6.0382	6.75976	6.7342	5.46783	1.1195	1.11527	0.905539	0.162852	0.157387	-0.143151	0.0986512	0.0468381	0.0303958	0.0558802
sp|Q10713|MPPA_HUMAN	PMPCA	MPPA_HUMAN Mitochondrial-processing peptidase subunit alpha	40	5.13133	5.76985	5.9378	6.44103	6.30905	6.40415	6.82752	7.1053	6.43038	6.2853	6.66088	6.58663	5.98949	5.28879	6.68583	6.14668	5.82	6.66151	6.4908	6.0277	1.14459	1.11526	1.03569	0.194828	0.157376	0.0505872	0.0928649	0.0558311	0.0257786	0.0955306
sp|Q9NVR5|KTU_HUMAN	DNAAF2	KTU_HUMAN Protein kintoun	1	6.32271	4.44215	6.33294	5.87726	3.75871	6.18225	7.75081	9.11584	7.93292	5.12311	7.21587	5.3505	4.44783	7.31963	6.49337	6.33409	5.74376	6.7019	6.4056	6.14873	1.16681	1.11523	1.07051	0.222574	0.157337	0.0982917	0.155537	0.343075	0.216078	0.197346
sp|P20936|RASA1_HUMAN	RASA1	RASA1_HUMAN Ras GTPase-activating protein 1	11	5.2504	5.78182	6.23898	6.5267	6.03316	6.64029	6.54975	6.43178	6.50243	6.4569	6.81067	6.76814	6.28232	5.77011	5.86523	6.09131	5.94947	6.41374	6.63454	6.00224	1.07804	1.11515	1.00887	0.108405	0.157233	0.0127392	0.0937759	0.0417385	0.0272255	0.0383594
sp|P04899-4|GNAI2_HUMAN	GNAI2	GNAI2_HUMAN Isoform sGi2 of Guanine nucleotide-binding protein G(i) subunit alpha-2	19	5.29848	6.06674	6.15452	6.61063	6.2944	6.59702	6.5554	6.99573	6.63086	6.35801	6.90918	7.00887	5.7569	5.11412	5.93222	5.71695	6.03259	6.61064	6.72673	5.63005	1.09582	1.11506	0.933272	0.132011	0.157127	-0.099631	0.0902414	0.0438025	0.0435989	0.063309
sp|Q9NPI8|FANCF_HUMAN	FANCF	FANCF_HUMAN Fanconi anemia group F protein	1	6.13884	6.23996	7.40409	6.37949	5.71991	5.49951	5.54058	8.32396	6.72968	5.42173	7.97693	9.04273	5.58051	4.65048	4.27841	5.07319	6.5406	6.27099	7.29277	4.89565	0.95878	1.115	0.748502	-0.0607287	0.157045	-0.417922	0.0892972	0.218783	0.214605	0.114439
sp|Q8IYQ7|THNS1_HUMAN	THNSL1	THNS1_HUMAN Threonine synthase-like 1	14	5.33493	6.01097	5.91867	6.48442	6.11992	6.44472	6.81597	6.72931	6.6242	6.16328	6.75705	6.93457	5.94618	5.42713	6.37888	5.90981	5.93725	6.52748	6.61978	5.9155	1.09941	1.11496	0.996337	0.136732	0.156988	-0.00529414	0.0794751	0.048196	0.0498237	0.0657766
sp|Q6YN16|HSDL2_HUMAN	HSDL2	HSDL2_HUMAN Hydroxysteroid dehydrogenase-like protein 2	22	5.45308	6.18285	5.65339	6.42889	6.31759	6.61479	6.70122	6.61061	6.60169	6.2577	6.76	6.82446	5.94828	5.06132	6.61397	5.97014	5.92955	6.56105	6.61096	5.89843	1.1065	1.11492	0.994751	0.146004	0.156937	-0.00759284	0.0764691	0.025544	0.0383342	0.108131
sp|Q8NFP9|NBEA_HUMAN	NBEA	NBEA_HUMAN Neurobeachin	6	5.42104	5.87097	5.93319	6.44765	6.43475	6.13051	6.5384	7.051	6.72731	5.91332	6.48471	7.26763	5.8849	5.15325	6.13517	6.6062	5.91821	6.53866	6.59824	5.94488	1.10484	1.1149	1.00451	0.143835	0.15692	0.00648619	0.071017	0.0585619	0.0851389	0.102035
sp|O00750|P3C2B_HUMAN	PIK3C2B	P3C2B_HUMAN Phosphatidylinositol 4-phosphate 3-kinase C2 domain-containing subunit beta	2	5.5732	5.55055	5.88105	6.25082	6.42822	6.4155	6.03926	7.17811	5.96617	6.32297	7.20533	6.42949	6.64048	5.42585	5.95778	6.73521	5.81391	6.51527	6.48099	6.18983	1.12064	1.11474	1.06466	0.164318	0.156707	0.0903923	0.0564117	0.0732602	0.0805373	0.0995036
sp|Q8WZA2|RPGF4_HUMAN	RAPGEF4	RPGF4_HUMAN Rap guanine nucleotide exchange factor 4	3	5.62694	5.97825	6.23293	6.22018	6.8329	6.57465	6.91379	6.43015	6.44203	6.04836	8.09223	6.23244	5.60046	5.38055	6.02729	5.36684	6.01457	6.68787	6.70376	5.59379	1.11194	1.11459	0.930038	0.153085	0.156509	-0.104638	0.0471761	0.0335806	0.140147	0.0550952
sp|Q3B7T1|EDRF1_HUMAN	EDRF1	EDRF1_HUMAN Erythroid differentiation-related factor 1	15	5.34516	5.92003	6.09808	6.39225	6.4028	6.68552	6.6316	6.9884	6.6043	6.54835	6.679	6.64494	5.86431	5.58985	5.94917	5.65621	5.93888	6.67708	6.61915	5.76488	1.1243	1.11454	0.970702	0.169026	0.156455	-0.0428991	0.0742758	0.0360984	0.00849275	0.0294197
sp|Q9Y2X7-3|GIT1_HUMAN	GIT1	GIT1_HUMAN Isoform 3 of ARF GTPase-activating protein GIT1	19	5.34906	5.98002	6.19278	6.32951	6.30918	6.56416	6.76139	6.71232	6.51593	6.48819	6.85429	6.72404	5.7833	5.51418	6.01016	5.91149	5.96284	6.58676	6.64561	5.80478	1.10463	1.1145	0.973493	0.143569	0.156402	-0.0387582	0.0727372	0.0308437	0.0262501	0.0370121
sp|O75251|NDUS7_HUMAN	NDUFS7	NDUS7_HUMAN NADH dehydrogenase [ubiquinone] iron-sulfur protein 7, mitochondrial	4	5.32753	6.62672	5.82893	6.21511	6.38311	6.81319	6.79141	6.95589	6.72826	6.48874	6.96863	6.56031	5.69917	5.27729	5.82866	5.50704	5.99957	6.7359	6.68649	5.57804	1.12273	1.11449	0.92974	0.167011	0.156388	-0.105101	0.092329	0.0365573	0.0318866	0.0430476
sp|O75191|XYLB_HUMAN	XYLB	XYLB_HUMAN Xylulose kinase	8	5.11762	6.00364	6.11749	6.61131	6.08624	6.17122	6.67962	6.90493	6.25154	6.18733	7.08318	7.05466	5.83167	5.20897	6.50001	6.19057	5.96251	6.4605	6.64418	5.93281	1.08352	1.11432	0.995017	0.115725	0.15617	-0.00720663	0.104311	0.0612197	0.0739427	0.0934593
sp|Q13190|STX5_HUMAN	STX5	STX5_HUMAN Syntaxin-5	13	5.49532	6.16349	5.81708	6.02275	6.62353	7.23656	6.61214	6.61557	6.33615	6.68749	6.64729	6.51206	5.96897	5.3376	6.35864	5.56535	5.87466	6.77195	6.54575	5.80764	1.15274	1.11423	0.988592	0.205066	0.156053	-0.0165533	0.0493907	0.0457441	0.0242304	0.077597
sp|Q9UBQ7|GRHPR_HUMAN	GRHPR	GRHPR_HUMAN Glyoxylate reductase/hydroxypyruvate reductase	27	5.17061	5.94432	5.92108	6.16119	6.28583	6.3005	6.94498	6.98363	6.37954	6.02901	6.75189	6.68571	6.12606	5.06983	6.94746	6.29834	5.7993	6.62874	6.46154	6.11042	1.14302	1.11419	1.05365	0.192855	0.155999	0.0753934	0.0746383	0.0585104	0.0512011	0.127435
sp|Q8NEW0|ZNT7_HUMAN	SLC30A7	ZNT7_HUMAN Zinc transporter 7	2	5.58602	5.46659	6.46306	6.80437	6.07088	6.28674	6.25933	6.47101	6.84872	6.39367	6.92081	6.93297	6.56886	5.36082	5.07575	6.49038	6.08001	6.27199	6.77404	5.87395	1.03158	1.11415	0.966109	0.0448496	0.155943	-0.0497421	0.107925	0.0261065	0.0378346	0.130519
sp|P33176|KINH_HUMAN	KIF5B	KINH_HUMAN Kinesin-1 heavy chain	70	5.23636	5.86962	5.95256	6.42468	6.29821	6.32693	6.73042	6.89062	6.45098	6.17515	6.84732	6.68906	6.12518	5.28882	6.62606	6.06803	5.87081	6.56155	6.54063	6.02702	1.11766	1.11409	1.02661	0.160477	0.155871	0.0378871	0.0832134	0.0449696	0.0448105	0.0916373
sp|P51161-2|FABP6_HUMAN	FABP6	FABP6_HUMAN Isoform 2 of Gastrotropin	1	5.82997	4.70786	6.1611	6.54977	5.98256	5.54235	5.50874	5.8319	6.01194	6.22758	6.83029	6.8313	6.21295	9.23415	6.40556	6.13197	5.81217	5.71639	6.47528	6.99616	0.98352	1.11409	1.20371	-0.0239744	0.155864	0.267485	0.136404	0.0400952	0.0648389	0.213889
sp|Q8NBL1|PGLT1_HUMAN	POGLUT1	PGLT1_HUMAN Protein O-glucosyltransferase 1	5	5.20444	6.07536	6.05599	6.60508	6.47858	6.44925	6.68019	6.44924	6.48316	6.47973	6.87775	6.83076	5.91758	5.30989	6.11824	5.98476	5.98522	6.51431	6.66785	5.83262	1.0884	1.11405	0.974504	0.12221	0.155818	-0.0372602	0.0967987	0.0171077	0.0324092	0.0614347
sp|Q13200|PSMD2_HUMAN	PSMD2	PSMD2_HUMAN 26S proteasome non-ATPase regulatory subunit 2	68	5.49628	6.10935	5.84097	6.27907	6.49035	6.8418	6.65275	6.70389	6.67494	6.4898	6.78513	6.47962	5.88335	5.40963	6.14793	5.71516	5.93142	6.6722	6.60737	5.78902	1.12489	1.11396	0.975992	0.169785	0.1557	-0.0350584	0.0575897	0.0217563	0.0225004	0.0534387
sp|Q7Z6J9|SEN54_HUMAN	TSEN54	SEN54_HUMAN tRNA-splicing endonuclease subunit Sen54	8	5.17894	6.18474	6.08387	6.81139	5.85303	6.22419	6.33328	6.84329	6.7484	6.36448	7.19111	6.7195	6.0564	5.11134	6.43767	5.85838	6.06473	6.31345	6.75587	5.86595	1.04101	1.11396	0.967222	0.0579834	0.155697	-0.0480804	0.110892	0.0647329	0.0501229	0.0950507
sp|Q969F1|TF3C6_HUMAN	GTF3C6	TF3C6_HUMAN General transcription factor 3C polypeptide 6	1	6.75858	6.1867	5.75968	5.72382	5.50121	6.82706	5.86291	5.86318	6.41544	7.75112	6.61228	6.43264	5.83902	6.71552	5.60286	6.14798	6.10719	6.01359	6.80287	6.07634	0.984673	1.11391	0.994949	-0.0222834	0.155634	-0.00730613	0.0790022	0.0945367	0.0938432	0.0791654
sp|P43490|NAMPT_HUMAN	NAMPT	NAMPT_HUMAN Nicotinamide phosphoribosyltransferase	53	5.22407	5.85336	6.03612	6.51768	6.26288	6.41604	6.80428	7.0667	6.28485	6.22568	7.07366	6.7382	5.8017	5.30175	6.376	6.01704	5.90781	6.63748	6.5806	5.87412	1.12351	1.11388	0.994298	0.168012	0.155596	-0.00824947	0.0905684	0.0551102	0.0608722	0.0764596
sp|Q8N0W3-2|FUK_HUMAN	FUK	FUK_HUMAN Isoform 2 of L-fucose kinase	3	5.33605	5.8229	5.62222	6.47553	6.46844	6.77084	6.43043	6.58181	6.06739	6.32998	6.66617	6.84133	6.55292	5.50142	6.49269	6.03988	5.81418	6.56288	6.47622	6.14673	1.12877	1.11387	1.0572	0.174755	0.155577	0.080244	0.0832536	0.0232865	0.0533344	0.0792856
sp|O95155-4|UBE4B_HUMAN	UBE4B	UBE4B_HUMAN Isoform 4 of Ubiquitin conjugation factor E4 B	26	5.52541	6.04655	6.02019	6.48784	6.36907	6.55199	6.66673	6.7503	7.07539	6.4877	6.74602	6.51132	5.65809	5.47677	5.9618	5.66482	6.02	6.58452	6.70511	5.69037	1.09377	1.11381	0.945245	0.129316	0.155498	-0.0812404	0.0653424	0.0250654	0.0407166	0.0352924
sp|P30101|PDIA3_HUMAN	PDIA3	PDIA3_HUMAN Protein disulfide-isomerase A3	101	5.17835	5.86727	6.49633	6.1937	6.28381	6.78568	6.85882	6.86644	6.414	6.53858	6.92627	6.55736	5.76429	5.18137	6.23767	5.85006	5.93391	6.69869	6.60905	5.75835	1.12888	1.11378	0.970413	0.174895	0.15546	-0.0433288	0.0952872	0.0416456	0.0334148	0.07577
sp|Q9Y375|CIA30_HUMAN	NDUFAF1	CIA30_HUMAN Complex I intermediate-associated protein 30, mitochondrial	5	5.3537	6.05912	5.897	6.57473	6.12415	6.39232	6.50995	7.26413	6.66421	6.4276	6.8089	6.7001	6.10825	5.65594	5.76061	5.69928	5.97114	6.57264	6.6502	5.80602	1.10073	1.11372	0.972347	0.138467	0.155392	-0.0404562	0.0842254	0.0743155	0.0241568	0.0354824
sp|Q9NUU7|DD19A_HUMAN	DDX19A	DD19A_HUMAN ATP-dependent RNA helicase DDX19A	29	5.3363	6.26362	5.7369	6.10741	6.62918	7.01454	6.74383	6.9458	6.583	6.46146	6.48375	6.58199	5.88747	5.32576	6.21086	5.68812	5.86106	6.83334	6.52755	5.77805	1.16589	1.11372	0.985838	0.221429	0.155381	-0.0205777	0.0705906	0.0260655	0.00981925	0.0641329
sp|Q9Y5P6-2|GMPPB_HUMAN	GMPPB	GMPPB_HUMAN Isoform 2 of Mannose-1-phosphate guanyltransferase beta	7	5.60935	5.76343	5.96752	6.34366	6.67909	6.92877	6.79971	6.99864	6.57613	6.42022	6.6676	6.71112	5.74001	5.15571	6.29834	5.34072	5.92099	6.85155	6.59377	5.6337	1.15716	1.11363	0.951479	0.210593	0.155265	-0.071757	0.053653	0.0206456	0.0195109	0.089773
sp|O95486|SC24A_HUMAN	SEC24A	SC24A_HUMAN Protein transport protein Sec24A	14	5.35865	6.19946	5.92406	6.10998	6.70814	6.79897	6.74399	6.54326	6.50759	6.50959	6.57783	6.67729	5.89816	5.26743	6.35724	5.81838	5.89804	6.69859	6.56807	5.8353	1.13573	1.1136	0.989363	0.183622	0.155236	-0.0154275	0.0639948	0.016434	0.012149	0.0765841
sp|Q15910-2|EZH2_HUMAN	EZH2	EZH2_HUMAN Isoform 2 of Histone-lysine N-methyltransferase EZH2	8	5.29577	5.74191	6.19745	6.3409	6.20343	6.81253	6.62178	6.90795	6.75603	5.92648	6.69587	6.86732	5.70563	5.53726	6.51719	5.87251	5.89401	6.63642	6.56142	5.90815	1.12596	1.11324	1.0024	0.171157	0.15476	0.00345695	0.0803481	0.0470459	0.0654147	0.0725228
sp|Q15120-2|PDK3_HUMAN	PDK3	PDK3_HUMAN Isoform 2 of [Pyruvate dehydrogenase (acetyl-transferring)] kinase isozyme 3, mitochondrial	4	5.18815	5.56904	5.9969	7.08312	6.22902	6.47897	6.72161	6.61057	6.65036	6.27733	6.72594	6.88146	5.52816	5.50595	6.47497	6.07846	5.9593	6.51004	6.63377	5.89689	1.09242	1.11318	0.989526	0.127523	0.154686	-0.0151904	0.137401	0.0325619	0.0386456	0.0792955
sp|Q86U90|YRDC_HUMAN	YRDC	YRDC_HUMAN YrdC domain-containing protein, mitochondrial	10	5.332	5.85345	5.95129	6.64033	6.34253	6.33946	6.60763	6.76097	6.34431	6.17295	7.10665	6.84372	5.91101	5.38696	6.60162	5.80511	5.94427	6.51265	6.61691	5.92617	1.09562	1.11316	0.996956	0.131745	0.154658	-0.00439781	0.0904729	0.0319166	0.0654519	0.0850362
sp|Q86W33|TPRA1_HUMAN	TPRA1	TPRA1_HUMAN Transmembrane protein adipocyte-associated 1	1	5.38368	6.61954	6.52045	5.16232	5.86244	6.58606	7.25326	6.62215	7.1153	6.45576	6.59894	6.19622	5.90256	5.8393	6.10408	5.77794	5.9215	6.58098	6.59155	5.90597	1.11137	1.11316	0.997378	0.15234	0.154657	-0.00378804	0.127559	0.0864033	0.0586975	0.0239646
sp|Q12931|TRAP1_HUMAN	TRAP1	TRAP1_HUMAN Heat shock protein 75 kDa, mitochondrial	87	5.25781	6.07829	5.95735	6.4779	6.29622	6.45412	6.53141	7.10807	6.44935	6.34975	6.86302	6.79877	5.92378	5.26449	6.25236	5.93731	5.94284	6.59746	6.61522	5.84448	1.11015	1.11314	0.98345	0.150758	0.154638	-0.024076	0.0854767	0.0536877	0.0383501	0.0710748
sp|O75140|DEPD5_HUMAN	DEPDC5	DEPD5_HUMAN DEP domain-containing protein 5	4	5.60448	5.63052	5.69457	6.5636	6.80043	6.56277	6.07922	6.30933	6.60829	6.08875	6.62982	6.82391	6.16392	6.22949	6.24303	5.96786	5.87329	6.43794	6.53769	6.15108	1.09614	1.11312	1.0473	0.132429	0.154612	0.0666691	0.0786202	0.0484768	0.0481227	0.0206362
sp|P49841-2|GSK3B_HUMAN	GSK3B	GSK3B_HUMAN Isoform 2 of Glycogen synthase kinase-3 beta	7	5.2144	5.88327	6.11399	6.20758	6.35487	6.63008	6.70231	7.08705	6.54003	6.45232	6.48838	6.58767	6.15829	5.29006	6.06355	6.22615	5.85481	6.69358	6.5171	5.93451	1.14326	1.11312	1.01361	0.193155	0.154608	0.0195072	0.0765465	0.0451211	0.00908953	0.0732628
sp|Q9Y5X0|SNX10_HUMAN	SNX10	SNX10_HUMAN Sorting nexin-10	1	5.87741	5.85406	4.99847	6.1099	7.01566	7.58209	6.516	6.00214	5.79211	5.6166	6.38277	7.63189	6.18994	5.05542	6.66861	6.70693	5.70996	6.77897	6.35584	6.15522	1.18722	1.11312	1.07798	0.247586	0.154603	0.108331	0.0854971	0.0998188	0.143434	0.125098
sp|Q9NR19-2|ACSA_HUMAN	ACSS2	ACSA_HUMAN Isoform 2 of Acetyl-coenzyme A synthetase, cytoplasmic	4	5.51964	6.27027	5.66321	6.15695	6.46502	6.75829	6.64192	6.8811	6.7799	6.4086	6.60553	6.48049	6.17714	5.19828	6.18424	5.80943	5.90252	6.68658	6.56863	5.84227	1.13284	1.11285	0.989793	0.179939	0.154262	-0.0148008	0.0621595	0.0264817	0.0247632	0.0793593
sp|Q5VWJ9|SNX30_HUMAN	SNX30	SNX30_HUMAN Sorting nexin-30	12	5.45307	6.24372	6.12934	6.32203	6.10542	6.37302	6.49276	6.71823	6.62377	6.66818	6.75678	6.82297	5.94245	5.2834	5.94428	6.12057	6.03704	6.42236	6.71792	5.82268	1.06383	1.11278	0.964492	0.0892616	0.154174	-0.0521593	0.0658058	0.0397361	0.0132818	0.0633892
sp|Q96LT4|SAMD8_HUMAN	SAMD8	SAMD8_HUMAN Sphingomyelin synthase-related protein 1	1	6.02142	5.96749	6.04199	6.37118	6.34719	6.38205	6.27788	6.48579	6.40506	6.55699	7.01519	7.17654	5.79801	5.39029	5.71635	6.04655	6.10052	6.37323	6.78844	5.7378	1.0447	1.11276	0.940543	0.0630919	0.154149	-0.0884345	0.0300227	0.0135937	0.0539633	0.0472148
sp|O15431|COPT1_HUMAN	SLC31A1	COPT1_HUMAN High affinity copper uptake protein 1	1	6.25037	5.51488	6.10202	6.35988	6.49057	6.49984	7.24148	6.78224	7.07574	6.89434	6.94402	6.04374	5.29247	5.90374	5.31847	5.2862	6.05679	6.75353	6.73946	5.45022	1.11504	1.11271	0.899853	0.15709	0.15408	-0.152238	0.0621465	0.0521709	0.0697513	0.0555334
sp|Q9NWR8|MCUB_HUMAN	CCDC109B	MCUB_HUMAN Mitochondrial calcium uniporter regulatory subunit MCUb	3	5.50565	5.45695	6.37856	6.45852	6.05233	6.50248	6.46916	6.5956	6.46954	7.20687	6.56165	6.2389	5.54809	6.05324	6.49732	6.00513	5.94992	6.40489	6.61924	6.02595	1.07647	1.11249	1.01278	0.106304	0.153795	0.0183172	0.0911716	0.0376362	0.0626365	0.0643944
sp|Q9BXJ9|NAA15_HUMAN	NAA15	NAA15_HUMAN N-alpha-acetyltransferase 15, NatA auxiliary subunit	85	5.24864	5.95081	6.00492	6.3111	6.24264	6.34594	6.67474	7.11729	6.42001	6.26056	6.81272	6.66722	6.05331	5.23382	6.48582	6.17048	5.87887	6.59515	6.54013	5.98586	1.12184	1.11248	1.0182	0.165868	0.15378	0.0260197	0.0763925	0.0597168	0.0377687	0.089142
sp|P22695|QCR2_HUMAN	UQCRC2	QCR2_HUMAN Cytochrome b-c1 complex subunit 2, mitochondrial	25	5.60689	6.40294	5.78385	6.49019	6.57211	6.95969	6.68019	6.97631	6.75584	6.7896	6.66983	6.7997	5.52327	5.10009	5.56143	5.32807	6.07097	6.79707	6.75374	5.37821	1.1196	1.11247	0.885891	0.162988	0.153761	-0.174799	0.0726604	0.0297706	0.00873613	0.0393663
sp|Q5SRE5|NU188_HUMAN	NUP188	NU188_HUMAN Nucleoporin NUP188 homolog	26	5.6076	6.02737	6.09474	6.70165	6.41762	6.92475	6.82858	6.72819	6.82845	6.749	6.86914	6.73214	5.50325	5.11828	5.60646	5.26279	6.10784	6.72479	6.79468	5.37269	1.10101	1.11245	0.879639	0.138826	0.153744	-0.185016	0.0737968	0.0327059	0.00956918	0.04141
sp|Q15035|TRAM2_HUMAN	TRAM2	TRAM2_HUMAN Translocating chain-associated membrane protein 2	4	5.23483	5.69464	6.10639	7.13304	6.12067	7.01786	6.70536	6.49161	6.12476	6.52826	7.54387	6.689	5.64728	6.10083	5.48904	5.37257	6.04223	6.58387	6.72147	5.65243	1.08964	1.11242	0.935488	0.123857	0.153697	-0.0962087	0.134002	0.0572468	0.0888847	0.056512
sp|Q5TBK1|N42L1_HUMAN	N4BP2L1	N42L1_HUMAN NEDD4-binding protein 2-like 1	1	5.5294	5.40385	6.96242	7.27367	5.89746	5.89281	6.31751	7.14535	6.27145	6.83024	7.61076	7.28624	5.71406	6.18872	4.84922	4.82684	6.29234	6.31328	6.99967	5.39471	1.00333	1.11241	0.857346	0.00479483	0.153692	-0.22205	0.153082	0.0933535	0.0830809	0.124462
sp|P50416|CPT1A_HUMAN	CPT1A	CPT1A_HUMAN Carnitine O-palmitoyltransferase 1, liver isoform	22	5.36054	6.11094	5.99854	6.46152	6.54141	6.72453	6.67058	6.93907	6.65255	6.52016	6.60265	6.84607	5.75599	5.35964	5.90809	5.54771	5.98288	6.7189	6.65536	5.64286	1.12302	1.1124	0.943167	0.167383	0.153675	-0.0844154	0.0767798	0.024658	0.0207902	0.0424839
sp|Q9BUX1|CHAC1_HUMAN	CHAC1	CHAC1_HUMAN Cation transport regulator-like protein 1	1	5.91585	6.21719	4.65324	5.96398	6.28439	6.76856	5.66332	5.35027	5.913	6.50815	5.67415	7.21055	5.6388	8.45435	7.14207	6.64214	5.68757	6.01663	6.32646	6.96934	1.05786	1.11233	1.22536	0.0811457	0.153588	0.293211	0.123445	0.105378	0.108406	0.167996
sp|Q8IXK2|GLT12_HUMAN	GALNT12	GLT12_HUMAN Polypeptide N-acetylgalactosaminyltransferase 12	8	5.4956	6.14696	6.08754	6.52103	6.3125	6.26065	6.57535	6.54088	6.57996	6.50674	7.03998	6.848	5.81376	5.52108	5.80256	5.94742	6.06278	6.42234	6.74367	5.77121	1.05931	1.11231	0.951907	0.0831201	0.153554	-0.0711075	0.0699386	0.0247294	0.036486	0.031062
sp|P62195|PRS8_HUMAN	PSMC5	PRS8_HUMAN 26S protease regulatory subunit 8	37	5.3206	6.06525	5.86409	6.28373	6.60756	6.67213	6.60774	7.00354	6.61832	6.46718	6.5828	6.50831	6.05724	5.43716	6.1432	5.76114	5.88342	6.72274	6.54415	5.84969	1.14266	1.1123	0.994267	0.192395	0.153552	-0.00829548	0.070111	0.0282102	0.0105145	0.054708
sp|O15344|TRI18_HUMAN	MID1	TRI18_HUMAN E3 ubiquitin-protein ligase Midline-1	7	5.37828	6.23177	5.8509	6.25558	6.70022	6.72675	6.64707	6.6059	6.93821	6.695	6.5377	6.20882	5.98324	5.6308	5.96754	5.64222	5.92913	6.66999	6.59493	5.80595	1.12495	1.11229	0.979224	0.169862	0.153537	-0.0302889	0.0693839	0.00810541	0.0463417	0.0337263
sp|Q9H944|MED20_HUMAN	MED20	MED20_HUMAN Mediator of RNA polymerase II transcription subunit 20	7	5.49411	5.98725	6.28258	6.17319	6.44932	5.5342	6.66054	6.90993	6.96779	6.25219	6.91474	6.4903	6.1182	5.67679	5.99179	6.09708	5.98428	6.3885	6.65626	5.97096	1.06755	1.11229	0.997775	0.0942984	0.153532	-0.00321417	0.0582829	0.0938937	0.0516567	0.0341253
sp|Q6UB35|C1TM_HUMAN	MTHFD1L	C1TM_HUMAN Monofunctional C1-tetrahydrofolate synthase, mitochondrial	44	5.35604	6.14204	6.09282	6.55245	6.5282	6.65961	6.76746	7.01603	6.89747	6.54993	6.7744	6.6325	5.7589	5.13044	5.72794	5.41379	6.03584	6.74282	6.71358	5.50777	1.11713	1.11229	0.912511	0.159799	0.153527	-0.132086	0.082481	0.0306622	0.0228937	0.0537324
sp|Q9P2Y5|UVRAG_HUMAN	UVRAG	UVRAG_HUMAN UV radiation resistance-associated gene protein	1	5.30813	6.11503	6.85594	6.55468	6.05477	6.13017	6.76575	6.67154	6.87812	6.27442	6.67641	7.78941	6.42739	5.35392	5.33964	4.80468	6.20845	6.40556	6.90459	5.48141	1.03175	1.11213	0.882895	0.0450922	0.153324	-0.179686	0.108386	0.0569604	0.0928422	0.124145
sp|O43677|NDUC1_HUMAN	NDUFC1	NDUC1_HUMAN NADH dehydrogenase [ubiquinone] 1 subunit C1, mitochondrial	1	5.54907	5.3164	5.03316	5.97128	6.3419	6.47291	7.64996	4.32571	6.32828	6.37761	5.4959	6.11934	8.26735	7.49413	6.53351	6.72351	5.46748	6.19762	6.08028	7.25462	1.13354	1.11208	1.32687	0.180839	0.153263	0.408026	0.0725423	0.222603	0.0666669	0.109267
sp|P52948|NUP98_HUMAN	NUP98	NUP98_HUMAN Nuclear pore complex protein Nup98-Nup96	32	5.54717	5.99652	6.03967	6.29145	6.44725	6.98232	6.65401	6.60675	6.60659	6.74222	6.7976	6.40266	5.83817	5.45124	5.83787	5.7585	5.9687	6.67258	6.63727	5.72144	1.11793	1.11201	0.958574	0.160828	0.153172	-0.0610378	0.0518804	0.0336663	0.0264849	0.032159
sp|Q96HW7|INT4_HUMAN	INTS4	INT4_HUMAN Integrator complex subunit 4	20	5.5607	5.98494	6.11197	6.54087	6.27667	6.38393	6.77369	6.74587	6.73262	6.42348	6.96488	6.78665	5.91985	5.43435	5.84438	5.51513	6.04962	6.54504	6.72691	5.67843	1.08189	1.11196	0.938642	0.113557	0.153099	-0.0913531	0.0666987	0.0385106	0.0334946	0.0421752
sp|P57060|RWD2B_HUMAN	RWDD2B	RWD2B_HUMAN RWD domain-containing protein 2B	1	4.41283	5.12937	6.99714	5.49814	6.97499	6.68795	6.89419	4.88417	5.81885	5.58792	5.43567	7.66218	5.94165	7.05187	7.34158	7.68149	5.50937	6.36033	6.12616	7.00415	1.15446	1.11195	1.27132	0.207213	0.153095	0.346322	0.197736	0.155888	0.169121	0.107596
sp|Q96D53|ADCK4_HUMAN	ADCK4	ADCK4_HUMAN Uncharacterized aarF domain-containing protein kinase 4	3	5.15131	6.1206	5.96101	6.69308	7.01552	6.2119	6.7425	6.5957	6.89533	6.42964	6.54688	6.73174	6.05526	5.50607	5.80492	5.53855	5.9815	6.64141	6.6509	5.7262	1.11032	1.11191	0.957318	0.150981	0.153042	-0.0629293	0.106409	0.0504464	0.0308207	0.0448814
sp|O75586|MED6_HUMAN	MED6	MED6_HUMAN Mediator of RNA polymerase II transcription subunit 6	4	5.21422	6.67698	6.17958	6.29394	6.19834	6.42484	6.25055	6.45023	6.41802	6.87165	6.74475	7.05041	5.71723	5.09022	6.35987	6.05917	6.09118	6.33099	6.77121	5.80662	1.03937	1.11164	0.953284	0.0557094	0.152691	-0.0690225	0.102137	0.0197899	0.0393964	0.093859
sp|Q14790-9|CASP8_HUMAN	CASP8	CASP8_HUMAN Isoform 9 of Caspase-8	15	5.40066	6.04527	5.99256	6.57843	6.17874	6.49561	6.67746	6.90058	6.54917	6.42553	6.81468	6.90827	5.77948	5.47726	5.88535	5.89094	6.00423	6.5631	6.67441	5.75826	1.09308	1.11162	0.959033	0.128398	0.152662	-0.0603469	0.0802105	0.0464872	0.0337239	0.0337294
sp|Q9NVH2|INT7_HUMAN	INTS7	INT7_HUMAN Integrator complex subunit 7	9	5.372	5.95091	6.06239	6.66937	6.42607	6.47737	6.38394	6.78828	6.49993	6.27428	6.5921	7.37327	5.96114	5.61182	5.87883	5.67831	6.01367	6.51891	6.68489	5.78252	1.08402	1.11162	0.961564	0.116387	0.15266	-0.0565455	0.088409	0.0281635	0.0714959	0.0284475
sp|Q8IWT3|CUL9_HUMAN	CUL9	CUL9_HUMAN Cullin-9	4	5.70874	5.80665	6.12978	6.39563	6.06836	6.26982	6.4413	6.51007	6.78561	6.19381	6.78901	6.95453	6.45816	6.12725	5.93886	5.42242	6.0102	6.32239	6.68074	5.98667	1.05194	1.11157	0.996085	0.0730565	0.152595	-0.00565865	0.0521896	0.03119	0.050003	0.0723442
sp|Q9UIV1|CNOT7_HUMAN	CNOT7	CNOT7_HUMAN CCR4-NOT transcription complex subunit 7	3	5.395	5.80788	6.20023	6.94774	6.1655	5.96891	6.71282	6.53104	6.95728	6.32464	7.20575	6.57989	6.14927	5.93214	5.84682	5.27511	6.08771	6.34457	6.76689	5.80083	1.04219	1.11157	0.952876	0.0596216	0.152593	-0.0696396	0.108567	0.0533387	0.057829	0.0642828
sp|P48426|PI42A_HUMAN	PIP4K2A	PI42A_HUMAN Phosphatidylinositol 5-phosphate 4-kinase type-2 alpha	5	5.23329	6.02446	6.16576	6.43047	6.23345	6.42594	6.22422	6.4568	6.62515	6.18926	6.73466	6.96579	6.36832	5.75313	6.04955	6.11974	5.96349	6.3351	6.62871	6.07268	1.06231	1.11155	1.01831	0.0872099	0.152571	0.0261764	0.0863706	0.0194803	0.0491143	0.0416878
sp|Q16891-2|IMMT_HUMAN	IMMT	IMMT_HUMAN Isoform 2 of Mitochondrial inner membrane protein	40	5.51774	6.0983	6.05198	6.61638	6.4118	6.92747	6.79317	6.97896	6.80476	6.58226	6.84563	6.75895	5.5224	4.89075	5.73322	5.46622	6.0711	6.77785	6.7479	5.40315	1.11641	1.11148	0.889978	0.15887	0.152481	-0.168158	0.0739472	0.0378134	0.0171852	0.0667048
sp|Q8WVY7|UBCP1_HUMAN	UBLCP1	UBCP1_HUMAN Ubiquitin-like domain-containing CTD phosphatase 1	17	5.36181	6.10801	6.22664	6.31002	6.002	6.41245	6.73693	6.95044	6.71045	6.34134	6.81511	6.81437	5.81267	5.13731	6.20432	6.05613	6.00162	6.52546	6.67032	5.80261	1.08728	1.11142	0.96684	0.120727	0.152403	-0.0486506	0.0724003	0.0633155	0.0336957	0.0813438
sp|Q5T447|HECD3_HUMAN	HECTD3	HECD3_HUMAN E3 ubiquitin-protein ligase HECTD3	7	5.98948	5.91713	6.03777	6.58419	6.0832	6.46734	6.4866	6.86237	6.73535	6.68644	7.0361	6.80226	5.61804	5.18991	5.80696	5.69685	6.13214	6.47488	6.81504	5.57794	1.05589	1.11136	0.909623	0.0784617	0.15233	-0.136659	0.0498057	0.049144	0.0227192	0.0484122
sp|Q8TAM1|BBS10_HUMAN	BBS10	BBS10_HUMAN Bardet-Biedl syndrome 10 protein	1	5.66044	6.54312	6.66137	5.62091	5.42132	6.88983	6.85406	8.0964	7.30344	6.86472	6.2291	6.8146	5.20819	4.79542	5.25038	5.78673	6.12146	6.8154	6.80297	5.26018	1.11336	1.11133	0.859302	0.154923	0.152288	-0.218764	0.0910716	0.16054	0.0648415	0.0773044
sp|P46934-4|NEDD4_HUMAN	NEDD4	NEDD4_HUMAN Isoform 4 of E3 ubiquitin-protein ligase NEDD4	11	5.46065	5.86365	6.14482	6.29551	6.38529	6.39709	6.79401	6.78719	6.60591	6.58571	6.62082	6.59754	5.92999	5.6595	5.95519	5.91712	5.94116	6.59089	6.6025	5.86545	1.10936	1.11131	0.987257	0.14973	0.152267	-0.0185022	0.0617627	0.0349978	0.00223583	0.023563
sp|Q9UHV7|MED13_HUMAN	MED13	MED13_HUMAN Mediator of RNA polymerase II transcription subunit 13	4	5.42102	6.01687	6.18306	5.73019	6.80282	6.40362	6.93483	6.72448	6.4496	6.78149	6.33891	6.37994	5.94379	5.64609	5.88787	6.35542	5.83779	6.71644	6.48749	5.95829	1.15051	1.11129	1.02064	0.202275	0.152238	0.0294779	0.0573746	0.0336322	0.0310225	0.0494421
sp|Q86U38|NOP9_HUMAN	NOP9	NOP9_HUMAN Nucleolar protein 9	12	5.53983	6.54764	5.94525	6.07953	6.51238	7.82014	7.10103	6.58001	6.49075	7.24327	6.62327	6.43739	5.30383	5.17403	5.36446	5.23719	6.02806	7.00339	6.69867	5.26988	1.1618	1.11125	0.874224	0.216359	0.15218	-0.193925	0.0689222	0.0863427	0.0554411	0.0156301
sp|Q9C0B7|TNG6_HUMAN	TANGO6	TNG6_HUMAN Transport and Golgi organization protein 6 homolog	6	5.54189	5.93154	5.91513	6.75097	6.43323	6.5054	6.67555	6.62954	6.36394	6.66539	6.99549	6.79934	5.72103	5.52135	6.00226	5.54794	6.03488	6.56093	6.70604	5.69815	1.08717	1.11121	0.944201	0.120575	0.152135	-0.0828333	0.0845381	0.0169807	0.0395631	0.0388249
sp|Q13546|RIPK1_HUMAN	RIPK1	RIPK1_HUMAN Receptor-interacting serine/threonine-protein kinase 1	21	5.63424	6.00347	5.90085	6.24982	6.47157	6.61965	6.80459	6.68438	6.66179	6.61716	6.71755	6.43726	5.94918	5.42831	6.08544	5.73471	5.9471	6.64505	6.60844	5.79941	1.11736	1.1112	0.975167	0.160094	0.152125	-0.036279	0.042852	0.0208776	0.018353	0.0493914
sp|Q9Y5Q0|FADS3_HUMAN	FADS3	FADS3_HUMAN Fatty acid desaturase 3	2	5.39466	5.91742	5.78046	6.00675	5.94312	6.13639	6.30206	6.33006	6.31707	6.60453	6.61088	6.13547	6.38212	7.18569	6.35696	6.59636	5.77482	6.17791	6.41699	6.63028	1.0698	1.1112	1.14814	0.0973417	0.15212	0.199294	0.0467525	0.028867	0.0362133	0.058148
sp|Q9BXM9|FSD1L_HUMAN	FSD1L	FSD1L_HUMAN FSD1-like protein	2	6.65022	5.562	6.09485	5.56701	6.10578	5.07415	6.46009	6.64148	7.29056	6.03081	6.68395	6.52327	6.19689	7.35949	5.84805	5.91139	5.96852	6.07038	6.63215	6.32896	1.01707	1.11119	1.06039	0.0244124	0.152103	0.0845941	0.0869056	0.115383	0.0783311	0.111168
sp|Q5SGD2|PPM1L_HUMAN	PPM1L	PPM1L_HUMAN Protein phosphatase 1L	4	5.16243	6.11368	5.92319	6.1638	6.51125	6.74043	6.67745	6.74661	6.39283	6.43488	6.53598	6.59564	5.90849	5.25539	6.67637	6.16159	5.84078	6.66894	6.48983	6.00046	1.14179	1.11113	1.02734	0.191297	0.152021	0.0389133	0.079434	0.0164448	0.0142767	0.0984248
sp|Q9Y2H1|ST38L_HUMAN	STK38L	ST38L_HUMAN Serine/threonine-protein kinase 38-like	3	5.3515	6.26348	5.56552	6.22445	6.83177	7.27862	6.31487	6.24859	6.88953	6.40497	6.66566	6.04502	6.36775	5.08304	6.34914	6.1161	5.85124	6.66846	6.50129	5.97901	1.13967	1.1111	1.02184	0.188612	0.151985	0.0311642	0.0789744	0.072452	0.055828	0.10172
sp|Q96J02|ITCH_HUMAN	ITCH	ITCH_HUMAN E3 ubiquitin-protein ligase Itchy homolog	13	5.33951	5.97714	6.0347	6.44507	6.49945	6.85751	6.57435	7.03215	6.43045	6.38894	6.85455	6.76559	5.85663	5.23887	5.82185	5.88324	5.94911	6.74086	6.60988	5.70015	1.13309	1.11107	0.958152	0.180261	0.151952	-0.0616734	0.0767663	0.0367855	0.0354931	0.0541291
sp|Q5M7Z0|RNFT1_HUMAN	RNFT1	RNFT1_HUMAN RING finger and transmembrane domain-containing protein 1	1	5.36358	6.31258	6.22818	6.62352	5.21379	6.21131	6.57464	7.21417	8.4573	5.9607	6.2848	6.54928	6.50668	5.41278	5.61242	5.47427	6.13196	6.30348	6.81302	5.75154	1.02797	1.11107	0.93796	0.0397985	0.151945	-0.0924018	0.0880189	0.132692	0.164729	0.0887246
sp|Q5JUR7|TEX30_HUMAN	TEX30	TEX30_HUMAN Testis-expressed sequence 30 protein	4	5.39684	5.76906	6.49482	6.63477	6.20565	6.46869	6.69595	7.03054	6.65176	6.46505	6.66825	7.20703	5.78483	5.12397	5.53588	5.86692	6.07387	6.60021	6.74802	5.5779	1.08666	1.11099	0.918343	0.119895	0.151848	-0.122895	0.0970809	0.053016	0.0473589	0.0598347
sp|O96013|PAK4_HUMAN	PAK4	PAK4_HUMAN Serine/threonine-protein kinase PAK 4	15	5.08275	5.73805	5.72877	6.28297	6.17469	6.55312	6.60253	6.87104	6.11274	6.26776	6.54161	6.44327	6.40216	5.81163	6.94044	6.44648	5.70813	6.55035	6.34135	6.40018	1.14755	1.11093	1.12124	0.198551	0.151769	0.165092	0.085995	0.0437778	0.0299441	0.0721904
sp|Q8TED1|GPX8_HUMAN	GPX8	GPX8_HUMAN Probable glutathione peroxidase 8	11	5.27683	6.07871	6.22645	6.4623	6.18331	6.41126	6.53247	7.04396	6.43326	6.47582	6.86998	6.92931	5.69383	5.54594	6.14204	5.69454	6.01107	6.54275	6.67709	5.76909	1.08845	1.1108	0.959743	0.122275	0.151598	-0.0592793	0.0855678	0.0556562	0.0387451	0.0447678
sp|Q8N2Q7|NLGN1_HUMAN	NLGN1	NLGN1_HUMAN Neuroligin-1	1	5.84476	5.9188	6.84977	5.63927	7.1481	5.44258	6.01461	5.93924	6.59214	5.43118	7.29478	7.61792	5.6082	6.03744	6.07925	6.54196	6.06315	6.13613	6.734	6.06671	1.01204	1.11064	1.00059	0.0172621	0.151397	0.000847429	0.0886635	0.117467	0.143804	0.0629188
sp|O00232|PSD12_HUMAN	PSMD12	PSD12_HUMAN 26S proteasome non-ATPase regulatory subunit 12	36	5.4304	6.16006	5.62814	6.21586	6.44241	6.76694	6.70452	6.81579	6.68287	6.43693	6.42033	6.48691	6.28232	5.54929	6.17046	5.80676	5.85862	6.68241	6.50676	5.95221	1.14061	1.11063	1.01598	0.18981	0.15138	0.0228652	0.0664723	0.0248948	0.0185605	0.0565677
sp|Q9H4M3|FBX44_HUMAN	FBXO44	FBX44_HUMAN F-box only protein 44	1	5.61393	6.49599	6.18552	6.46782	6.08409	5.11376	5.99425	6.80329	6.7158	5.96189	7.56979	7.25536	6.00274	5.09615	6.09734	6.54228	6.19081	5.99885	6.87571	5.93463	0.968992	1.11063	0.958618	-0.045444	0.151379	-0.0609719	0.0661212	0.115404	0.102378	0.102191
sp|Q06210|GFPT1_HUMAN	GFPT1	GFPT1_HUMAN Glutamine--fructose-6-phosphate aminotransferase [isomerizing] 1	46	5.51317	5.97963	5.83364	6.41561	6.52567	6.74589	6.55938	7.07005	6.7777	6.46128	6.59611	6.53275	5.97532	5.48404	5.81303	5.71672	5.93551	6.72525	6.59196	5.74728	1.13305	1.1106	0.968287	0.180215	0.151335	-0.0464939	0.0631278	0.0370898	0.0205589	0.0357368
sp|Q9H9E3|COG4_HUMAN	COG4	COG4_HUMAN Conserved oligomeric Golgi complex subunit 4	16	5.67879	6.03703	5.92687	6.60871	6.37455	6.56326	6.81616	6.88165	6.82066	6.40269	6.7451	6.96306	5.68231	5.21034	5.84133	5.44748	6.06285	6.6589	6.73288	5.54536	1.09831	1.11051	0.914647	0.135289	0.151227	-0.128714	0.0649102	0.0351497	0.0353417	0.0497326
sp|P55212|CASP6_HUMAN	CASP6	CASP6_HUMAN Caspase-6	7	5.20743	6.14767	6.15867	6.36393	6.30375	6.39388	6.76421	6.99852	6.61724	6.39552	6.77952	6.72412	6.01091	5.26038	6.13028	5.74397	5.96943	6.61509	6.6291	5.78639	1.10816	1.11051	0.969337	0.148169	0.151221	-0.0449297	0.0867153	0.048994	0.0255935	0.0667208
sp|O75431|MTX2_HUMAN	MTX2	MTX2_HUMAN Metaxin-2	5	5.49255	6.28573	5.95079	6.41577	6.70615	6.94663	6.40056	6.66426	6.7336	6.64254	6.44676	6.9891	5.61887	5.14365	6.07918	5.48385	6.03621	6.6794	6.703	5.58139	1.10656	1.11047	0.924651	0.146076	0.151164	-0.113019	0.0682519	0.0334892	0.0335923	0.0694165
sp|Q9Y5Q8-3|TF3C5_HUMAN	GTF3C5	TF3C5_HUMAN Isoform 3 of General transcription factor 3C polypeptide 5	12	5.91912	6.90079	5.93692	5.80107	6.39114	7.14405	6.15943	6.18973	6.21111	7.21526	7.43569	6.40836	5.62064	5.79842	5.52952	5.33875	6.13948	6.47109	6.81761	5.57183	1.05401	1.11045	0.907542	0.0758929	0.15115	-0.139963	0.08325	0.0711281	0.0878229	0.034342
sp|Q96SK2|TM209_HUMAN	TMEM209	TM209_HUMAN Transmembrane protein 209	4	5.00494	5.57251	6.15563	6.34225	6.64235	6.50311	7.17511	6.14099	5.92176	5.92006	7.00771	6.77404	6.17764	6.23657	5.97005	6.45527	5.76883	6.61539	6.40589	6.20988	1.14675	1.11043	1.07645	0.197547	0.15112	0.106287	0.104989	0.0648225	0.0886804	0.0321377
sp|Q96PU5|NED4L_HUMAN	NEDD4L	NED4L_HUMAN E3 ubiquitin-protein ligase NEDD4-like	19	5.35822	6.02329	6.21751	6.54895	6.32014	6.70522	6.69217	6.88391	6.8614	6.50245	6.72749	6.72329	5.80976	5.31941	5.69092	5.61586	6.03699	6.65036	6.70366	5.60899	1.1016	1.11043	0.929103	0.139602	0.151118	-0.10609	0.0831317	0.0356204	0.0221795	0.0372448
sp|Q8IWB7|WDFY1_HUMAN	WDFY1	WDFY1_HUMAN WD repeat and FYVE domain-containing protein 1	10	5.14154	6.12756	5.97983	6.29783	6.45601	6.45276	6.67252	7.14637	6.73065	6.0134	6.6192	6.78258	5.97731	4.7635	6.44009	6.39883	5.88669	6.68192	6.53646	5.89493	1.13509	1.11038	1.0014	0.182805	0.151052	0.00201864	0.0872269	0.0488285	0.0543572	0.132781
sp|Q32NB8|PGPS1_HUMAN	PGS1	PGPS1_HUMAN CDP-diacylglycerol--glycerol-3-phosphate 3-phosphatidyltransferase, mitochondrial	1	5.3019	6.15101	5.98805	6.74533	6.37211	6.99829	7.01134	6.92143	6.23751	7.22831	6.85527	6.53475	5.74981	5.20741	5.59104	5.10642	6.04657	6.82579	6.71396	5.41367	1.12887	1.11037	0.895329	0.174879	0.151046	-0.159511	0.0981736	0.0446901	0.0634043	0.0565727
sp|P61764|STXB1_HUMAN	STXBP1	STXB1_HUMAN Syntaxin-binding protein 1	9	5.29218	6.30789	6.13784	6.25661	6.43486	6.82127	6.77748	7.06116	6.69993	6.61818	6.78924	6.53358	5.80938	4.89049	6.02163	5.54829	5.99863	6.77369	6.66023	5.56745	1.12921	1.11029	0.92812	0.175309	0.150939	-0.107617	0.079405	0.0380915	0.016454	0.0882039
sp|P51784|UBP11_HUMAN	USP11	UBP11_HUMAN Ubiquitin carboxyl-terminal hydrolase 11	26	5.32487	5.944	6.02912	6.55863	6.3949	6.37838	6.77922	7.15118	6.65237	6.49795	6.66801	6.66843	5.83434	5.2582	6.07225	5.78816	5.96415	6.67592	6.62169	5.73824	1.11934	1.11025	0.962121	0.162649	0.150882	-0.0557101	0.0847631	0.0549722	0.0125091	0.0598406
sp|A2VDJ0-5|T131L_HUMAN	KIAA0922	T131L_HUMAN Isoform 4 of Transmembrane protein 131-like	3	5.76015	5.88734	6.08726	6.23398	6.74425	6.05063	6.93474	6.67874	6.73014	6.2558	6.73898	6.88444	5.60257	5.46647	6.22492	5.71961	5.99218	6.60209	6.65234	5.75339	1.10178	1.11017	0.96015	0.139841	0.15078	-0.0586687	0.0350505	0.0580634	0.0411378	0.0575198
sp|P62875|RPAB5_HUMAN	POLR2L	RPAB5_HUMAN DNA-directed RNA polymerases I, II, and III subunit RPABC5	3	5.49943	4.61373	5.46968	6.84898	5.57698	6.51491	7.44198	5.27255	4.73105	6.43605	6.64213	7.09339	6.42802	8.2613	6.78084	6.38898	5.60796	6.2016	6.22565	6.96479	1.10586	1.11015	1.24195	0.145167	0.150751	0.312604	0.164708	0.158264	0.166011	0.126656
sp|Q9NRG9|AAAS_HUMAN	AAAS	AAAS_HUMAN Aladin	10	5.46473	6.15392	6.01866	6.49353	6.48533	6.76136	6.69266	7.10401	6.54932	6.65978	6.85965	6.71772	5.69481	5.39364	5.55542	5.39548	6.03271	6.76084	6.69662	5.50984	1.1207	1.11005	0.913327	0.164396	0.150626	-0.130796	0.0709655	0.0380296	0.0192934	0.0262742
sp|Q58A45|PAN3_HUMAN	PAN3	PAN3_HUMAN PAB-dependent poly(A)-specific ribonuclease subunit 3	2	5.47691	5.94097	5.93334	6.30896	6.96729	6.49903	6.79205	6.83594	6.8223	5.96126	6.45833	7.02172	6.04312	5.36723	6.0344	5.53716	5.91505	6.77358	6.5659	5.74548	1.14514	1.11003	0.971333	0.195529	0.150604	-0.0419623	0.0575913	0.0291714	0.0709294	0.0601698
sp|O15287|FANCG_HUMAN	FANCG	FANCG_HUMAN Fanconi anemia group G protein	5	5.92434	6.3418	5.29936	6.09561	6.32089	5.99596	6.01407	6.40716	6.14001	6.4088	6.913	6.80015	6.48603	5.8787	6.15645	6.81767	5.91528	6.18452	6.56549	6.33471	1.04552	1.10992	1.07091	0.0642158	0.150457	0.0988333	0.0752164	0.0340164	0.0543088	0.0641795
sp|O00429-2|DNM1L_HUMAN	DNM1L	DNM1L_HUMAN Isoform 4 of Dynamin-1-like protein	39	5.47727	6.11452	5.89838	6.49943	6.51738	6.47189	6.55225	7.01023	6.8268	6.48842	6.72437	6.58459	5.94366	5.33914	5.8607	5.69095	5.9974	6.63794	6.65605	5.70861	1.1068	1.10982	0.951848	0.146398	0.150328	-0.0711971	0.0711392	0.0377175	0.0224572	0.0469169
sp|A6NJ78|MET15_HUMAN	METTL15	MET15_HUMAN Probable methyltransferase-like protein 15	4	5.62968	6.5155	5.50051	6.34188	6.95676	6.66102	6.4726	6.98725	6.26117	6.36548	6.85097	7.14262	5.6999	4.6923	6.00281	5.91957	5.99689	6.76941	6.65506	5.57864	1.12882	1.10975	0.930256	0.174814	0.150237	-0.1043	0.0844376	0.036425	0.0622635	0.108369
sp|Q9P2J5|SYLC_HUMAN	LARS	SYLC_HUMAN Leucine--tRNA ligase, cytoplasmic	62	5.45887	6.20564	6.02437	6.57576	6.40133	6.67866	6.66966	6.96088	6.84673	6.41295	6.82943	6.83776	5.68168	5.00533	5.81227	5.59868	6.06616	6.67763	6.73172	5.52449	1.1008	1.10972	0.910706	0.138553	0.150191	-0.134942	0.076715	0.0342187	0.0315862	0.0646391
sp|P03923|NU6M_HUMAN	MT-ND6	NU6M_HUMAN NADH-ubiquinone oxidoreductase chain 6	1	5.73584	5.98337	6.42018	6.61991	6.32435	5.6356	7.02188	6.71293	7.0353	7.05911	7.11621	6.26412	5.68851	5.74172	5.7186	4.92238	6.18982	6.42369	6.86868	5.5178	1.03778	1.10967	0.891431	0.0535036	0.150135	-0.165805	0.0650758	0.093077	0.0588862	0.0720478
sp|Q9NQW7-3|XPP1_HUMAN	XPNPEP1	XPP1_HUMAN Isoform 3 of Xaa-Pro aminopeptidase 1	34	5.37266	6.02959	5.79322	6.30453	6.50162	6.44347	6.53624	6.73057	6.63431	6.27361	6.58631	6.58304	6.35888	5.52735	6.52303	5.80158	5.875	6.55297	6.51932	6.05271	1.1154	1.10967	1.03025	0.157561	0.150132	0.0429924	0.0671875	0.0189884	0.025382	0.0771404
sp|Q9H4A6|GOLP3_HUMAN	GOLPH3	GOLP3_HUMAN Golgi phosphoprotein 3	7	5.56395	6.06027	5.5171	6.50139	6.37484	6.94128	6.7854	6.83222	6.64401	6.61642	6.43516	6.53917	5.88812	5.25352	6.39239	5.65474	5.91068	6.73344	6.55869	5.79719	1.1392	1.10963	0.9808	0.188019	0.150084	-0.0279691	0.0785357	0.0368048	0.014263	0.0820285
sp|Q16774-2|KGUA_HUMAN	GUK1	KGUA_HUMAN Isoform 2 of Guanylate kinase	7	5.44051	5.70248	5.81571	6.33975	5.96518	6.63205	6.91465	6.95708	6.33443	6.25845	6.55821	6.69732	6.23147	5.58475	6.531	6.03696	5.82461	6.61724	6.4621	6.09605	1.13608	1.10945	1.0466	0.184068	0.149842	0.0657115	0.0648398	0.0692161	0.0312498	0.0650975
sp|Q9BZL4|PP12C_HUMAN	PPP1R12C	PP12C_HUMAN Protein phosphatase 1 regulatory subunit 12C	5	5.73187	5.84181	6.19339	6.18356	6.14294	6.41209	5.88151	6.07173	6.79223	6.43626	6.28612	7.057	6.54813	6.30382	5.91661	6.20094	5.98766	6.12707	6.6429	6.24238	1.02328	1.10943	1.04254	0.033205	0.149822	0.0601033	0.0394515	0.035863	0.0524198	0.0418865
sp|Q13568-2|IRF5_HUMAN	IRF5	IRF5_HUMAN Isoform 2 of Interferon regulatory factor 5	7	5.33695	5.82307	6.11179	6.84163	6.3633	6.36395	6.81694	6.74666	6.48768	6.37582	6.99725	6.89119	6.10647	5.31709	5.87392	5.54629	6.02836	6.57271	6.68798	5.71094	1.0903	1.10942	0.947346	0.124723	0.149806	-0.0780367	0.104412	0.0369912	0.0452293	0.0610966
sp|P49643|PRI2_HUMAN	PRIM2	PRI2_HUMAN DNA primase large subunit	14	5.46484	6.27882	5.96024	6.46253	6.57917	6.38983	6.37599	6.85021	6.99744	6.45415	6.7402	6.61802	5.81204	5.37803	5.91502	5.72348	6.04161	6.5488	6.70245	5.70714	1.08395	1.10938	0.94464	0.116298	0.149757	-0.0821639	0.0723204	0.0337906	0.034156	0.0408174
sp|Q13057-2|COASY_HUMAN	COASY	COASY_HUMAN Isoform 2 of Bifunctional coenzyme A synthase	6	5.60321	6.14302	6.02582	6.37488	6.64881	6.67387	6.28256	6.92455	6.93661	6.56881	6.59356	6.68822	5.51286	5.47899	6.33608	5.20815	6.03673	6.63245	6.6968	5.63402	1.09868	1.10934	0.93329	0.135773	0.149704	-0.0996032	0.0535668	0.0398652	0.0250793	0.0865278
sp|Q99829|CPNE1_HUMAN	CPNE1	CPNE1_HUMAN Copine-1	18	5.26167	5.87692	6.10599	6.22901	6.29034	6.44147	6.80162	6.95983	6.23625	6.26014	6.86529	6.6781	6.15535	5.24097	6.51316	6.0839	5.8684	6.62331	6.50995	5.99834	1.12864	1.10932	1.02214	0.174587	0.149679	0.0315979	0.0732727	0.0468591	0.0479124	0.0898096
sp|O14965|AURKA_HUMAN	AURKA	AURKA_HUMAN Aurora kinase A	2	5.95647	5.07063	5.68108	7.01515	6.38513	7.02327	6.1799	6.01746	6.44229	6.25248	7.01368	6.60685	6.11411	6.34386	6.20256	5.69508	5.93083	6.40144	6.57883	6.0889	1.07935	1.10926	1.02665	0.110162	0.149595	0.0379476	0.136936	0.0688917	0.0492567	0.0458338
sp|Q8NBS3|S4A11_HUMAN	SLC4A11	S4A11_HUMAN Sodium bicarbonate transporter-like protein 11	1	5.72885	6.17636	5.75845	6.73844	6.12297	6.586	6.30235	7.30572	7.07336	6.81343	6.73852	6.4428	5.56797	5.45536	5.46804	5.72138	6.10053	6.57926	6.76703	5.55319	1.07847	1.10925	0.91028	0.108992	0.149589	-0.135617	0.077341	0.0791078	0.038339	0.0221349
sp|Q13131-2|AAPK1_HUMAN	PRKAA1	AAPK1_HUMAN Isoform 2 of 5'-AMP-activated protein kinase catalytic subunit alpha-1	18	5.35179	5.96693	5.8648	6.18069	6.1913	6.53142	6.43758	6.4994	6.3857	6.51599	6.45808	6.55571	6.20876	5.80871	6.58566	6.45747	5.84105	6.41493	6.47887	6.26515	1.09825	1.1092	1.07261	0.135204	0.149514	0.101121	0.0602168	0.0240201	0.0114103	0.054614
sp|Q15119|PDK2_HUMAN	PDK2	PDK2_HUMAN [Pyruvate dehydrogenase (acetyl-transferring)] kinase isozyme 2, mitochondrial	6	5.37228	6.405	6.08308	6.4528	6.1272	6.33138	6.43197	6.90487	6.65318	6.45419	6.98688	6.87157	5.72517	5.08356	6.38706	5.72978	6.07829	6.44886	6.74146	5.73139	1.06097	1.1091	0.942928	0.0853775	0.149394	-0.0847798	0.0820112	0.0510776	0.035048	0.0928525
sp|Q53S58|TM177_HUMAN	TMEM177	TM177_HUMAN Transmembrane protein 177	1	5.19632	7.02368	6.05385	6.66741	7.42867	6.29232	6.12388	6.86633	6.54165	6.33651	7.76691	7.0147	5.28424	4.36688	5.31741	5.71923	6.23531	6.6778	6.91494	5.17194	1.07096	1.109	0.829459	0.0989104	0.149255	-0.269757	0.128324	0.0887943	0.0918323	0.110589
sp|Q7Z5Y7|KCD20_HUMAN	KCTD20	KCD20_HUMAN BTB/POZ domain-containing protein KCTD20	1	5.59905	5.61436	6.72635	6.48542	6.1563	7.64229	6.51185	6.51664	6.43529	7.14537	6.54681	6.95753	5.48697	5.00292	5.12873	6.04413	6.1063	6.70677	6.77125	5.41569	1.09834	1.1089	0.886902	0.135321	0.149125	-0.173153	0.0958413	0.0963364	0.0495644	0.0861305
sp|Q9Y5A7|NUB1_HUMAN	NUB1	NUB1_HUMAN NEDD8 ultimate buster 1	12	5.33748	5.99126	6.2982	6.31021	6.36912	6.30072	6.27479	6.69458	6.41919	6.4387	6.83234	6.85293	6.01457	5.39319	6.24449	6.22823	5.98429	6.4098	6.63579	5.97012	1.07111	1.10887	0.997633	0.0991004	0.149089	-0.00341956	0.0761609	0.0302625	0.0360356	0.0667713
sp|Q8IWY9|CDAN1_HUMAN	CDAN1	CDAN1_HUMAN Codanin-1	1	5.40719	6.54265	6.10927	6.01576	6.14204	6.60299	6.74245	6.93966	6.74145	6.30045	6.73146	6.92238	6.6805	5.22035	5.62079	5.28062	6.01872	6.60678	6.67394	5.70057	1.09771	1.10886	0.947139	0.134492	0.149082	-0.0783512	0.0777342	0.0513444	0.0395564	0.1187
sp|O43819|SCO2_HUMAN	SCO2	SCO2_HUMAN Protein SCO2 homolog, mitochondrial	8	5.56651	6.00845	6.00464	6.41737	6.29457	6.27988	6.62421	6.79956	6.72508	6.03763	6.5379	7.30806	6.15606	5.67853	5.77975	5.7818	5.99924	6.49955	6.65217	5.84903	1.0834	1.10883	0.974962	0.115561	0.149044	-0.0365817	0.0579186	0.0393081	0.0788906	0.0359518
sp|O43402|EMC8_HUMAN	EMC8	EMC8_HUMAN ER membrane protein complex subunit 8	5	5.43708	6.01709	6.29729	6.03831	6.5048	6.60799	6.8499	6.93776	6.66115	6.46396	6.41458	6.83757	6.17252	5.25552	5.45649	6.048	5.94744	6.72511	6.59431	5.73313	1.13076	1.10876	0.963966	0.177289	0.148953	-0.0529458	0.0610859	0.0301144	0.0294231	0.0777999
sp|Q53EP0|FND3B_HUMAN	FNDC3B	FND3B_HUMAN Fibronectin type III domain-containing protein 3B	8	5.45923	6.07788	6.1737	6.30938	6.62281	6.66093	6.55699	6.96181	6.64432	6.5331	6.92494	6.5281	5.82221	5.53257	5.84467	5.34736	6.00505	6.70064	6.65761	5.6367	1.11583	1.10867	0.938661	0.158122	0.14883	-0.0913242	0.0626255	0.0267634	0.0279554	0.0425073
sp|Q13233|M3K1_HUMAN	MAP3K1	M3K1_HUMAN Mitogen-activated protein kinase kinase kinase 1	1	4.50455	6.7578	6.39387	6.24805	4.85905	6.58521	7.15477	7.09764	6.4404	6.61946	7.0887	6.35298	6.96346	5.21776	5.96058	5.75572	5.97607	6.42417	6.62538	5.97438	1.07498	1.10865	0.999718	0.104313	0.148808	-0.00040744	0.16803	0.16724	0.0495348	0.122191
sp|Q8NE62|CHDH_HUMAN	CHDH	CHDH_HUMAN Choline dehydrogenase, mitochondrial	2	4.75383	4.78916	7.83952	6.44436	6.81153	6.58706	7.43531	6.9415	6.60672	6.29696	6.81238	6.69585	5.61847	4.85147	6.01878	5.49711	5.95672	6.94385	6.60298	5.49646	1.16572	1.10849	0.922733	0.221218	0.148599	-0.116015	0.248868	0.0516806	0.0334255	0.0881162
sp|Q8NEB9|PK3C3_HUMAN	PIK3C3	PK3C3_HUMAN Phosphatidylinositol 3-kinase catalytic subunit type 3	21	5.56133	5.78156	6.3146	6.42963	6.17342	6.46295	6.63125	6.74864	6.61275	6.66124	6.79765	6.62823	5.92076	5.62789	5.96616	5.68193	6.02178	6.50407	6.67497	5.79918	1.08009	1.10847	0.963035	0.111152	0.148571	-0.0543398	0.0692578	0.0383872	0.012622	0.0291537
sp|Q9BRY0|S39A3_HUMAN	SLC39A3	S39A3_HUMAN Zinc transporter ZIP3	1	4.12967	5.585	5.3214	7.79658	4.99314	9.63902	8.30794	5.64753	4.77272	6.17312	6.79293	7.5704	6.96284	5.46834	5.90297	4.9364	5.70816	7.14691	6.32729	5.81764	1.25205	1.10846	1.01918	0.324293	0.148562	0.027407	0.267945	0.307034	0.18706	0.147778
sp|Q9HBG6-3|IF122_HUMAN	IFT122	IF122_HUMAN Isoform 3 of Intraflagellar transport protein 122 homolog	2	5.3712	6.64801	5.4106	6.05519	7.69362	7.46249	6.97682	6.69941	6.71807	6.69052	6.07332	6.54913	5.56852	5.44674	5.58203	5.05435	5.87125	7.20809	6.50776	5.41291	1.22769	1.10841	0.921935	0.295948	0.148493	-0.117263	0.103108	0.0626965	0.0459347	0.0455691
sp|Q9NVC3|S38A7_HUMAN	SLC38A7	S38A7_HUMAN Putative sodium-coupled neutral amino acid transporter 7	1	5.22156	4.06703	5.85016	6.43445	5.84603	7.01564	7.44241	4.85088	4.90531	5.76823	5.71374	7.52406	7.08184	8.20488	6.79972	7.27406	5.3933	6.28874	5.97783	7.34013	1.16603	1.10838	1.36097	0.221603	0.148455	0.444636	0.187908	0.18641	0.184641	0.0829041
sp|Q8IWA4|MFN1_HUMAN	MFN1	MFN1_HUMAN Mitofusin-1	8	5.98317	5.55956	5.97971	6.50354	6.37792	6.45147	6.65154	6.82686	7.08391	6.43364	6.52319	6.58594	6.15538	5.07547	5.94372	5.86498	6.0065	6.57695	6.65667	5.75989	1.09497	1.10825	0.958943	0.130895	0.148277	-0.0604827	0.0643412	0.0308341	0.0438061	0.0820274
tr|H0Y5C6|H0Y5C6_HUMAN	FLNA	H0Y5C6_HUMAN Filamin-A (Fragment)	2	5.08985	6.21825	5.63886	6.24078	6.01824	7.38094	7.25929	5.89069	6.73767	7.20226	5.67589	6.08077	7.276	4.9834	6.88149	5.42561	5.79694	6.63729	6.42415	6.14162	1.14497	1.1082	1.05946	0.195304	0.148215	0.0833301	0.0944566	0.119286	0.105635	0.18054
sp|Q8NB90|SPAT5_HUMAN	SPATA5	SPAT5_HUMAN Spermatogenesis-associated protein 5	21	5.64575	6.22362	5.92403	6.28995	6.72034	6.61738	6.6386	6.84025	6.88489	6.63048	6.59196	6.58098	5.7604	5.28143	5.71819	5.65176	6.02084	6.70414	6.67208	5.60295	1.11349	1.10816	0.930592	0.155089	0.148172	-0.103779	0.0492333	0.0150673	0.0215006	0.0390792
sp|Q8IV36|HID1_HUMAN	HID1	HID1_HUMAN Protein HID1	11	5.4328	6.02685	5.96707	6.37246	6.53215	6.74713	6.68348	6.86882	6.65961	6.63247	6.44794	6.63307	5.71245	5.56354	5.84224	5.87794	5.94979	6.70789	6.59327	5.74904	1.12742	1.10815	0.966259	0.17302	0.148155	-0.0495183	0.0652508	0.020892	0.0148198	0.0248135
sp|Q14203|DCTN1_HUMAN	DCTN1	DCTN1_HUMAN Dynactin subunit 1	40	5.8103	6.02293	5.87203	6.4119	6.26474	6.62324	6.79722	6.70849	6.75389	6.47186	6.92998	6.56805	5.73542	5.21342	6.14954	5.66699	6.02929	6.59842	6.68095	5.69134	1.09439	1.10808	0.943949	0.130133	0.148064	-0.0832191	0.0448242	0.0353903	0.0304063	0.0673581
sp|P63172|DYLT1_HUMAN	DYNLT1	DYLT1_HUMAN Dynein light chain Tctex-type 1	2	5.69266	5.83111	5.98886	6.39333	6.81845	6.90952	6.27425	6.42657	6.35417	6.60954	6.83608	6.6888	6.08701	5.51359	5.82337	5.75271	5.97649	6.6072	6.62215	5.79417	1.10553	1.10803	0.969494	0.14474	0.148001	-0.0446964	0.0507149	0.0461975	0.0304749	0.0407262
sp|Q5SRH9|TT39A_HUMAN	TTC39A	TT39A_HUMAN Tetratricopeptide repeat protein 39A	1	5.51364	5.98	5.8683	6.48395	6.08051	7.47625	6.93208	6.63359	5.63135	6.85168	6.70219	7.23633	5.85549	6.37357	4.90488	5.47617	5.96147	6.78061	6.60539	5.65253	1.1374	1.10801	0.948176	0.185746	0.147974	-0.0767726	0.0672763	0.085936	0.104041	0.109589
sp|Q86SQ9-2|DHDDS_HUMAN	DHDDS	DHDDS_HUMAN Isoform 2 of Dehydrodolichyl diphosphate synthase	3	5.3539	5.98549	5.90243	6.37454	6.42465	6.40686	7.0135	7.09251	6.80646	5.83572	6.4538	7.07008	5.9488	5.16948	5.97495	6.18683	5.90409	6.73438	6.54152	5.82001	1.14063	1.10796	0.98576	0.18983	0.14791	-0.0206918	0.0712353	0.0548527	0.08163	0.0767342
sp|Q8TC07-3|TBC15_HUMAN	TBC1D15	TBC15_HUMAN Isoform 3 of TBC1 domain family member 15	30	5.39919	6.09855	5.94076	6.33679	6.63244	6.47171	6.58259	6.63531	6.41147	6.19452	6.39721	7.33888	5.95861	5.60022	5.94342	6.05833	5.94382	6.58051	6.58552	5.89015	1.10712	1.10796	0.990969	0.146809	0.147906	-0.0130879	0.0669452	0.0116202	0.0777342	0.0339364
tr|B4DUV4|B4DUV4_HUMAN	POFUT1	B4DUV4_HUMAN GDP-fucose protein O-fucosyltransferase 1	1	6.00891	5.5922	6.65652	5.26915	6.38677	6.826	6.70584	6.40555	7.17881	5.94636	6.92413	6.01562	6.143	5.55848	6.31103	6.07164	5.88169	6.58104	6.51623	6.02104	1.1189	1.10788	1.02369	0.162084	0.147806	0.0337801	0.101801	0.0333046	0.0962771	0.0538594
sp|Q8N5M1|ATPF2_HUMAN	ATPAF2	ATPF2_HUMAN ATP synthase mitochondrial F1 complex assembly factor 2	3	5.39975	5.68052	5.79419	6.66852	6.09189	6.69064	6.43884	6.74409	6.6706	6.61325	6.24699	6.5516	6.01332	5.72944	6.21391	6.45244	5.88575	6.49137	6.52061	6.10228	1.1029	1.10786	1.03679	0.141297	0.147782	0.0521227	0.0930296	0.0458647	0.0289504	0.0502423
sp|Q9Y512|SAM50_HUMAN	SAMM50	SAM50_HUMAN Sorting and assembly machinery component 50 homolog	17	5.4964	6.26091	6.12618	6.52991	6.3408	6.70447	6.72567	6.95744	6.71669	6.55471	6.81654	6.95725	5.53524	4.89786	5.75209	5.62784	6.10335	6.6821	6.7613	5.45326	1.09482	1.1078	0.893486	0.130699	0.147699	-0.162483	0.0717736	0.0381247	0.0250585	0.0698251
sp|Q8IYU2|HACE1_HUMAN	HACE1	HACE1_HUMAN E3 ubiquitin-protein ligase HACE1	1	6.78046	5.05373	6.56268	6.49501	6.03065	5.7753	8.63909	5.65991	6.25097	5.4593	7.80188	8.05867	4.86758	4.69363	6.22594	5.64521	6.22297	6.52624	6.8927	5.35809	1.04873	1.10762	0.861018	0.0686482	0.147467	-0.215884	0.12678	0.217133	0.180674	0.132747
sp|P46439|GSTM5_HUMAN	GSTM5	GSTM5_HUMAN Glutathione S-transferase Mu 5	3	6.30373	6.36864	6.5634	5.78215	6.55127	7.34111	6.05653	6.58443	9.01286	6.44399	5.70733	6.544	5.56769	6.18084	3.56486	5.42715	6.25448	6.63333	6.92704	5.18513	1.06057	1.10753	0.829027	0.0848444	0.14735	-0.270508	0.0533472	0.0799031	0.207841	0.217673
sp|Q9UNE7|CHIP_HUMAN	STUB1	CHIP_HUMAN E3 ubiquitin-protein ligase CHIP	24	5.03564	6.10953	6.23089	6.49434	6.28159	6.51482	6.5798	6.75646	6.43932	6.25778	6.97737	6.76017	5.85212	5.16957	6.54427	5.99635	5.9676	6.53317	6.60866	5.89058	1.09477	1.10742	0.987093	0.130632	0.147207	-0.0187418	0.107536	0.0300546	0.048696	0.0960239
sp|Q8TD26|CHD6_HUMAN	CHD6	CHD6_HUMAN Chromodomain-helicase-DNA-binding protein 6	3	5.21639	5.974	5.99015	7.39024	6.51898	6.68036	6.56905	7.13995	6.50532	6.55364	6.98034	7.1698	5.7788	5.00548	5.48043	5.04707	6.14269	6.72708	6.80227	5.32794	1.09514	1.10738	0.867363	0.13111	0.147146	-0.205293	0.147601	0.0421262	0.0477712	0.0693349
sp|O15228|GNPAT_HUMAN	GNPAT	GNPAT_HUMAN Dihydroxyacetone phosphate acyltransferase	14	5.46696	5.88583	5.94663	6.71609	6.60236	6.83781	6.69596	6.80323	6.65112	6.60281	6.66979	6.66647	5.85307	5.24943	5.55843	5.79401	6.00388	6.73484	6.64755	5.61374	1.12175	1.10721	0.935018	0.165749	0.146928	-0.0969336	0.0866928	0.0158865	0.00465041	0.0488445
sp|P21860|ERBB3_HUMAN	ERBB3	ERBB3_HUMAN Receptor tyrosine-protein kinase erbB-3	1	4.46652	4.9522	5.51374	6.40183	6.97229	6.10344	7.15789	9.42732	4.44434	4.09054	8.08361	7.00172	5.91587	7.01485	6.06593	6.38792	5.33357	7.41524	5.90505	6.34614	1.39029	1.10715	1.18985	0.47539	0.146848	0.250778	0.155775	0.191221	0.329754	0.0767968
sp|Q8IUF8|MINA_HUMAN	MINA	MINA_HUMAN Bifunctional lysine-specific demethylase and histidyl-hydroxylase MINA	9	5.20313	6.0745	6.12072	6.4923	6.40869	6.61469	6.33989	6.91126	6.49915	6.53814	6.74918	6.66092	5.84669	5.27421	6.03988	6.22665	5.97266	6.56863	6.61185	5.84686	1.09978	1.10702	0.978937	0.137219	0.146679	-0.0307128	0.091424	0.0390535	0.017333	0.0704786
sp|Q8TF46|DI3L1_HUMAN	DIS3L	DI3L1_HUMAN DIS3-like exonuclease 1	8	5.23063	6.13162	6.05341	6.82338	6.34834	6.75191	6.56771	6.56034	6.16662	6.41734	7.24196	7.00601	5.5078	5.22154	6.24885	5.72253	6.05976	6.55708	6.70798	5.67518	1.08207	1.10697	0.936535	0.113792	0.146618	-0.0945945	0.107615	0.0251605	0.0746125	0.0764785
sp|P46199|IF2M_HUMAN	MTIF2	IF2M_HUMAN Translation initiation factor IF-2, mitochondrial	10	5.72539	6.12778	6.00175	6.31451	6.3514	6.58964	6.84666	6.44321	6.75133	6.76128	6.74164	6.49725	6.13686	5.19361	5.96496	5.55274	6.04236	6.55773	6.68788	5.71204	1.08529	1.10683	0.945333	0.118084	0.146436	-0.0811048	0.0409288	0.0329638	0.0190398	0.0741781
sp|Q00537|CDK17_HUMAN	CDK17	CDK17_HUMAN Cyclin-dependent kinase 17	6	5.65737	6.22845	6.00751	6.50326	6.4719	6.59491	6.1899	6.52625	6.50772	6.67786	6.97995	6.83732	5.80107	5.34254	5.82951	5.8445	6.09915	6.44574	6.75071	5.7044	1.05683	1.10683	0.935279	0.0797384	0.146432	-0.0965312	0.0586279	0.027589	0.0301652	0.0424084
sp|Q9NX63|CHCH3_HUMAN	CHCHD3	CHCH3_HUMAN Coiled-coil-helix-coiled-coil-helix domain-containing protein 3, mitochondrial	10	5.63719	6.13942	6.04605	6.67224	6.38026	6.68849	6.85192	6.85892	6.70912	6.65068	6.94833	6.80309	5.49693	5.11289	5.61201	5.39246	6.12373	6.6949	6.7778	5.40357	1.09327	1.10681	0.8824	0.128652	0.146409	-0.180496	0.0695295	0.033466	0.0191607	0.0395159
sp|P36507|MP2K2_HUMAN	MAP2K2	MP2K2_HUMAN Dual specificity mitogen-activated protein kinase kinase 2	13	5.3593	6.08326	6.08128	6.72577	6.29615	6.16248	6.51486	7.25148	6.8314	6.28824	7.07169	6.64733	5.90901	5.22771	5.79617	5.75385	6.0624	6.55624	6.70967	5.67169	1.08146	1.10677	0.935551	0.11298	0.146351	-0.0961122	0.0920973	0.0740847	0.0492329	0.0534483
sp|O95573|ACSL3_HUMAN	ACSL3	ACSL3_HUMAN Long-chain-fatty-acid--CoA ligase 3	28	5.51121	6.13321	5.92675	6.49521	6.42472	6.88286	6.5895	6.71257	6.74766	6.7828	6.41722	6.68612	5.84716	5.30269	5.92515	5.61517	6.0166	6.65241	6.65845	5.67254	1.10568	1.10668	0.942816	0.14493	0.146239	-0.0849517	0.0682702	0.0291131	0.0248871	0.0492749
sp|Q9UGV2|NDRG3_HUMAN	NDRG3	NDRG3_HUMAN Protein NDRG3	8	5.53263	5.77361	5.89235	6.58215	6.31432	6.07508	6.39304	6.86148	6.64765	6.39526	6.86911	6.40379	6.24289	5.81687	6.1416	6.05816	5.94519	6.41098	6.57895	6.06488	1.07835	1.1066	1.02013	0.108823	0.146136	0.0287574	0.0757323	0.0513752	0.034364	0.0299719
sp|P21802-11|FGFR2_HUMAN	FGFR2	FGFR2_HUMAN Isoform 11 of Fibroblast growth factor receptor 2	4	5.8929	5.67348	5.94024	6.65283	6.2029	6.5076	6.26263	6.28669	6.35516	6.77831	6.8524	6.74901	5.5461	6.29488	6.46815	5.53674	6.03986	6.31495	6.68372	5.96147	1.04555	1.1066	0.98702	0.0642567	0.146136	-0.0188482	0.0703407	0.0210885	0.0334124	0.0822239
sp|P06746|DPOLB_HUMAN	POLB	DPOLB_HUMAN DNA polymerase beta	13	5.27939	5.86019	6.17743	6.40786	6.35388	6.39331	6.69354	6.74933	6.7979	6.26997	6.72173	6.4639	6.14499	5.03399	6.67457	5.97801	5.93122	6.54751	6.56337	5.95789	1.10391	1.10658	1.0045	0.142619	0.14611	0.00647321	0.0824664	0.0309664	0.0369099	0.114767
sp|P09417|DHPR_HUMAN	QDPR	DHPR_HUMAN Dihydropteridine reductase	20	4.99311	5.93213	6.33659	6.23069	6.14511	6.60591	6.74571	6.90487	6.20576	6.30935	6.99441	6.48624	6.01864	5.32255	6.58976	6.17918	5.87313	6.6004	6.49894	6.02753	1.12383	1.10655	1.02629	0.168424	0.146075	0.037438	0.104061	0.0495694	0.0538587	0.0875888
sp|Q13547|HDAC1_HUMAN	HDAC1	HDAC1_HUMAN Histone deacetylase 1	21	5.37181	5.93238	6.11127	6.32615	6.34462	6.47872	6.59114	6.83719	6.4591	6.48517	6.737	6.58809	5.95117	5.68287	6.24239	5.86094	5.9354	6.56292	6.56734	5.93434	1.10572	1.10647	0.999821	0.144991	0.145963	-0.000257673	0.0688684	0.0318118	0.0191969	0.0393756
sp|P18031|PTN1_HUMAN	PTPN1	PTN1_HUMAN Tyrosine-protein phosphatase non-receptor type 1	34	5.36602	6.09113	6.16402	6.44638	6.46769	6.57181	6.82817	7.04929	6.68046	6.48562	6.92546	6.53815	5.74767	5.17902	5.79173	5.66738	6.01689	6.72924	6.65742	5.59645	1.11839	1.10646	0.930124	0.161426	0.145946	-0.104505	0.0764787	0.0388853	0.0295516	0.0505692
sp|Q93015-2|NAT6_HUMAN	NAT6	NAT6_HUMAN Isoform 2 of N-acetyltransferase 6	3	5.01725	5.9237	6.14388	6.92319	5.50232	6.01236	6.82311	6.96101	6.04891	6.12764	7.4806	6.9049	6.30858	5.21672	6.90521	5.70061	6.00201	6.3247	6.64051	6.03278	1.05376	1.10638	1.00513	0.0755525	0.14585	0.00737845	0.130645	0.109053	0.102456	0.121564
sp|Q6P4Q7|CNNM4_HUMAN	CNNM4	CNNM4_HUMAN Metal transporter CNNM4	2	5.75546	5.27214	5.74067	6.68748	6.3533	5.58258	5.94129	5.78151	5.80378	7.01262	7.00082	6.13328	5.73355	6.58155	7.50543	7.11456	5.86394	5.91467	6.48762	6.73377	1.00865	1.10636	1.14834	0.012428	0.145821	0.199545	0.101149	0.055315	0.0946921	0.113878
sp|Q13464|ROCK1_HUMAN	ROCK1	ROCK1_HUMAN Rho-associated protein kinase 1	36	5.54857	5.73249	6.07109	6.4749	6.12738	6.16651	6.54251	6.65303	6.54663	6.32874	6.85787	6.62698	6.03982	5.86534	6.31202	6.10613	5.95676	6.37236	6.59006	6.08083	1.06977	1.10631	1.02083	0.0972988	0.145762	0.0297392	0.0684294	0.0415307	0.0331598	0.030354
sp|Q68DK2|ZFY26_HUMAN	ZFYVE26	ZFY26_HUMAN Zinc finger FYVE domain-containing protein 26	2	5.87724	5.86962	6.37453	6.14199	6.79349	6.14465	6.51535	6.91759	6.72783	6.21481	6.60794	7.29203	5.63632	5.24735	6.01289	5.62636	6.06584	6.59277	6.71065	5.63073	1.08687	1.1063	0.928268	0.120176	0.145744	-0.107387	0.0398351	0.0520013	0.0663476	0.0555093
sp|Q9Y2X0|MED16_HUMAN	MED16	MED16_HUMAN Mediator of RNA polymerase II transcription subunit 16	14	5.48896	6.11295	6.18294	6.73869	6.3133	6.66022	6.60756	6.83053	6.86822	6.6547	6.73868	6.86751	5.68433	5.12199	5.5361	5.59333	6.13088	6.6029	6.78228	5.48394	1.07699	1.10625	0.894477	0.107005	0.145674	-0.160883	0.0834103	0.0325985	0.0154235	0.0453867
sp|Q8TEB1|DCA11_HUMAN	DCAF11	DCA11_HUMAN DDB1- and CUL4-associated factor 11	9	5.21434	6.13604	6.02148	6.79745	6.23427	6.4407	6.69084	6.85635	6.70071	6.27657	6.94143	6.81846	5.88335	5.39807	6.00025	5.58971	6.04233	6.55554	6.68429	5.71785	1.08494	1.10624	0.946298	0.11761	0.14567	-0.0796329	0.107468	0.0417937	0.0432413	0.047983
sp|Q5XUX1|FBXW9_HUMAN	FBXW9	FBXW9_HUMAN F-box/WD repeat-containing protein 9	2	5.58858	5.50174	6.55292	6.24955	6.35783	6.87291	6.93833	6.65867	6.49048	6.17695	6.87196	6.89183	5.99291	5.43983	6.07662	5.3389	5.9732	6.70694	6.6078	5.71206	1.12284	1.10624	0.956283	0.16715	0.145668	-0.064491	0.08551	0.0390036	0.05168	0.0659039
sp|P30837|AL1B1_HUMAN	ALDH1B1	AL1B1_HUMAN Aldehyde dehydrogenase X, mitochondrial	26	5.54699	6.05639	5.77711	6.3099	6.53109	6.66618	6.4813	6.52288	6.77299	6.48751	6.44459	6.50157	6.21305	5.80443	6.13429	5.74974	5.9226	6.55036	6.55166	5.97538	1.10599	1.10621	1.00891	0.145345	0.145632	0.0127998	0.0560123	0.012248	0.0228228	0.0388746
sp|Q9NRN7|ADPPT_HUMAN	AASDHPPT	ADPPT_HUMAN L-aminoadipate-semialdehyde dehydrogenase-phosphopantetheinyl transferase	15	5.02927	6.05561	6.07473	6.46017	6.04139	6.25499	6.65724	6.85595	6.46841	6.07089	6.81881	6.7688	6.04447	5.44494	6.68324	6.27108	5.90494	6.45239	6.53173	6.11093	1.09271	1.10615	1.03488	0.127911	0.145541	0.0494689	0.103779	0.0574834	0.0526654	0.0845644
sp|P17706|PTN2_HUMAN	PTPN2	PTN2_HUMAN Tyrosine-protein phosphatase non-receptor type 2	11	5.32025	6.04153	6.20191	6.44045	6.25875	6.2336	6.61102	7.01339	6.48674	6.26128	6.88521	6.9187	6.0313	5.25101	6.00412	6.04076	6.00103	6.52919	6.63798	5.8318	1.08801	1.10614	0.971799	0.121693	0.145533	-0.0412707	0.08041	0.0560412	0.0480111	0.0664466
sp|Q8TDX7|NEK7_HUMAN	NEK7	NEK7_HUMAN Serine/threonine-protein kinase Nek7	5	5.42081	6.45173	6.07443	6.35521	6.25004	6.92733	6.82825	6.44879	6.92833	6.55613	6.71438	6.68136	5.83002	5.21512	5.99024	5.32784	6.07554	6.6136	6.72005	5.5908	1.08856	1.10608	0.920215	0.122423	0.145458	-0.119958	0.0765205	0.0481197	0.023018	0.0674855
sp|O75419-3|CDC45_HUMAN	CDC45	CDC45_HUMAN Isoform 3 of Cell division control protein 45 homolog	2	4.80797	5.90053	6.27238	6.95452	6.32166	6.33493	6.93714	7.19279	6.95426	5.84665	7.28962	6.38387	6.70153	5.47057	5.47904	5.15256	5.98385	6.69663	6.6186	5.70093	1.11912	1.10608	0.952719	0.162361	0.145452	-0.069878	0.149943	0.0654013	0.0961107	0.120008
sp|P57740|NU107_HUMAN	NUP107	NU107_HUMAN Nuclear pore complex protein Nup107	17	5.5279	6.01882	6.08722	6.57918	6.46849	6.6251	6.70176	6.92775	6.88578	6.50726	6.66393	6.72257	5.82802	5.30578	5.49203	5.65841	6.05328	6.68077	6.69489	5.57106	1.10366	1.10599	0.920337	0.142298	0.145342	-0.119765	0.0710509	0.0286102	0.0233589	0.0401743
tr|H0YMT9|H0YMT9_HUMAN	ANXA2	H0YMT9_HUMAN Annexin (Fragment)	2	5.60671	4.75923	6.8203	6.06776	6.69323	6.16158	6.82563	6.81655	6.61441	6.02757	6.94665	6.12959	6.67436	6.32296	5.48138	6.05208	5.8135	6.62425	6.42956	6.1327	1.13946	1.10597	1.05491	0.18835	0.145312	0.0771142	0.148389	0.047447	0.0667839	0.0820888
sp|P53667|LIMK1_HUMAN	LIMK1	LIMK1_HUMAN LIM domain kinase 1	7	5.4139	6.29219	5.96207	6.4149	6.52378	6.08233	6.70258	6.56268	6.3291	6.19127	7.12645	6.98821	6.03363	5.27168	6.20621	5.899	6.02076	6.46784	6.65876	5.85263	1.07426	1.10597	0.972074	0.103338	0.145306	-0.0408617	0.0743246	0.0414716	0.0701454	0.0695754
sp|Q9H0B6|KLC2_HUMAN	KLC2	KLC2_HUMAN Kinesin light chain 2	20	4.97102	6.00723	6.07238	6.61098	6.15338	6.27862	6.63891	6.88021	6.2391	6.09555	7.02304	6.81105	5.98117	5.20342	6.815	6.21893	5.9154	6.48778	6.54218	6.05463	1.09676	1.10596	1.02354	0.133249	0.145296	0.0335625	0.115844	0.0513077	0.0680646	0.110182
sp|Q7Z6B7|SRGP1_HUMAN	SRGAP1	SRGP1_HUMAN SLIT-ROBO Rho GTPase-activating protein 1	6	5.78152	6.09565	6.21296	6.30119	6.17186	6.69514	6.60325	6.18994	6.47307	7.00955	6.55394	6.93501	5.7782	5.83565	5.78007	5.583	6.09783	6.41505	6.74289	5.74423	1.05202	1.10579	0.942012	0.073164	0.145072	-0.0861824	0.037236	0.0425656	0.0398423	0.0192788
sp|Q5JWF2|GNAS1_HUMAN	GNAS	GNAS1_HUMAN Guanine nucleotide-binding protein G(s) subunit alpha isoforms XLas	18	5.43094	6.05436	6.04738	6.45717	6.48397	6.86729	6.76941	7.04408	6.66744	6.43307	6.71896	6.70727	5.75914	5.19313	5.87528	5.49111	5.99746	6.79119	6.63169	5.57967	1.13234	1.10575	0.930338	0.179312	0.145023	-0.104174	0.07061	0.0344915	0.0202413	0.0544445
sp|Q9BTC8|MTA3_HUMAN	MTA3	MTA3_HUMAN Metastasis-associated protein MTA3	5	5.40831	6.15537	5.92636	6.91673	6.16839	6.19736	6.17983	6.80428	6.4592	6.53391	7.11845	6.87596	5.61015	5.51586	6.03303	6.09683	6.10169	6.33746	6.74688	5.81397	1.03864	1.10574	0.952845	0.0546964	0.145011	-0.0696865	0.102728	0.0491424	0.0455102	0.0504802
sp|P14550|AK1A1_HUMAN	AKR1A1	AK1A1_HUMAN Alcohol dehydrogenase [NADP(+)]	47	5.2282	5.95817	6.2006	6.11588	6.27378	6.53268	6.74086	6.80381	6.25252	6.3013	6.82292	6.61115	5.81607	5.47079	6.63444	6.23684	5.87571	6.58778	6.49697	6.03954	1.12119	1.10573	1.02788	0.165029	0.145004	0.0396737	0.0754308	0.0363186	0.0414268	0.0836798
sp|Q9Y2V0|CO041_HUMAN	C15orf41	CO041_HUMAN Uncharacterized protein C15orf41	2	5.87633	5.93489	6.43824	6.33574	6.20783	6.52261	6.32177	6.26582	6.80607	6.49909	6.86828	7.01118	6.32796	5.45899	5.26771	5.85748	6.1463	6.32951	6.79615	5.72804	1.02981	1.10573	0.931948	0.0423751	0.145001	-0.101678	0.045893	0.021626	0.0317617	0.0819442
sp|Q9H3U5-6|MFSD1_HUMAN	MFSD1	MFSD1_HUMAN Isoform 6 of Major facilitator superfamily domain-containing protein 1	1	5.67474	6.04309	6.63507	6.50552	6.1122	5.68274	6.2748	6.25966	8.0247	6.44166	6.63504	6.38487	5.62553	5.57341	5.93187	6.19509	6.2146	6.08235	6.87157	5.83148	0.978719	1.10571	0.93835	-0.0310339	0.144977	-0.0918019	0.070892	0.0454295	0.112955	0.0496321
sp|P43353|AL3B1_HUMAN	ALDH3B1	AL3B1_HUMAN Aldehyde dehydrogenase family 3 member B1	2	5.65827	5.78811	5.70569	6.61561	6.48554	7.01672	6.90588	7.03958	6.57084	6.78339	6.61294	6.31126	5.87004	5.20734	5.75172	5.67708	5.94192	6.86193	6.56961	5.62655	1.15483	1.10564	0.946924	0.207685	0.144878	-0.0786799	0.0761234	0.0375449	0.0297147	0.0516379
sp|P57764|GSDMD_HUMAN	GSDMD	GSDMD_HUMAN Gasdermin-D	6	5.43081	6.24925	5.84443	6.46325	6.45641	6.71857	6.67501	7.21268	6.88472	6.56193	6.66203	6.41218	5.75884	5.35505	5.78003	5.5348	5.99694	6.76567	6.63021	5.60718	1.12819	1.1056	0.935008	0.174007	0.14483	-0.09695	0.0761034	0.0471972	0.0299109	0.0359183
sp|P36897|TGFR1_HUMAN	TGFBR1	TGFR1_HUMAN TGF-beta receptor type-1	3	5.29005	5.81641	6.19693	7.46375	5.79137	6.45764	6.38782	6.29258	6.32081	6.66887	7.6655	6.7251	5.70303	5.73191	6.04856	5.43964	6.19179	6.23235	6.84507	5.73079	1.00655	1.10551	0.925547	0.00942146	0.14471	-0.111623	0.149539	0.0484042	0.0840663	0.0435097
sp|Q2VPB7|AP5B1_HUMAN	AP5B1	AP5B1_HUMAN AP-5 complex subunit beta-1	1	6.2732	5.29241	6.04617	7.17593	6.3412	7.27219	6.78021	7.13292	7.30997	6.98741	6.24143	6.86349	5.40674	4.78352	4.68768	5.40551	6.19693	6.88163	6.85058	5.07086	1.11049	1.10548	0.818287	0.151197	0.144672	-0.289322	0.125175	0.0603848	0.0653351	0.0767326
sp|Q8NFA0|UBP32_HUMAN	USP32	UBP32_HUMAN Ubiquitin carboxyl-terminal hydrolase 32	13	5.56955	6.13739	6.00723	6.54284	6.29381	6.44359	6.37805	6.86895	6.85483	6.55355	6.68391	6.72207	6.06299	5.68574	5.68949	5.50602	6.06425	6.4961	6.70359	5.73606	1.07121	1.10543	0.945881	0.099244	0.144604	-0.0802697	0.0661234	0.0394106	0.0184948	0.0408237
sp|Q6SJ93|F111B_HUMAN	FAM111B	F111B_HUMAN Protein FAM111B	2	5.34237	5.54148	5.56261	7.19495	5.92932	6.90922	6.44851	6.98663	6.73422	6.59498	7.06033	5.74343	5.43989	5.90876	6.1062	6.49712	5.91035	6.56842	6.53324	5.98799	1.11134	1.10539	1.01314	0.152302	0.144554	0.0188282	0.145867	0.0742657	0.0859443	0.073422
sp|Q9UN37|VPS4A_HUMAN	VPS4A	VPS4A_HUMAN Vacuolar protein sorting-associated protein 4A	15	5.26791	6.08224	6.05995	6.45489	6.42268	6.56433	6.7296	6.91654	6.63962	6.37422	6.77072	6.59545	5.73322	5.2982	6.24027	5.85018	5.96625	6.65829	6.595	5.78047	1.11599	1.10539	0.968861	0.158327	0.144549	-0.0456377	0.0837311	0.0319916	0.0250094	0.0670825
sp|Q9BXP5|SRRT_HUMAN	SRRT	SRRT_HUMAN Serrate RNA effector molecule homolog	33	5.49705	6.10612	5.99954	6.45899	6.58939	6.68798	6.65848	6.94636	6.70053	6.48748	6.79165	6.61604	5.86214	5.10689	5.96169	5.52967	6.01542	6.72055	6.64893	5.6151	1.11722	1.10531	0.93345	0.159913	0.144454	-0.0993556	0.0660747	0.023228	0.0194514	0.0687233
sp|P11586|C1TC_HUMAN	MTHFD1	C1TC_HUMAN C-1-tetrahydrofolate synthase, cytoplasmic	74	5.41569	6.33306	5.77535	6.38424	6.47048	6.9277	6.61599	7.06204	6.59318	6.55424	6.59057	6.68675	5.79064	5.21652	5.95186	5.63169	5.97709	6.76905	6.60618	5.64768	1.1325	1.10525	0.944888	0.179512	0.144375	-0.0817844	0.0777779	0.0403304	0.00856384	0.0559101
sp|Q53FT3|HIKES_HUMAN	C11orf73	HIKES_HUMAN Protein Hikeshi	5	5.48769	5.29474	5.76308	6.58984	6.47247	6.62797	6.84684	6.48667	5.90919	6.09781	6.81115	6.75143	6.4175	5.99432	6.6102	5.83911	5.78384	6.60849	6.39239	6.21528	1.14258	1.10522	1.07459	0.192293	0.14433	0.103793	0.0986662	0.0262868	0.071376	0.0578011
sp|Q8TAG9|EXOC6_HUMAN	EXOC6	EXOC6_HUMAN Exocyst complex component 6	7	5.74294	6.22053	6.25552	6.15599	6.4754	6.71337	6.44655	6.21437	6.66166	6.80515	7.06073	6.41127	5.36054	5.586	5.95144	5.93856	6.09375	6.46242	6.7347	5.70913	1.0605	1.10518	0.936884	0.0847459	0.144285	-0.094057	0.0389704	0.0315768	0.0403194	0.0503639
sp|O14975|S27A2_HUMAN	SLC27A2	S27A2_HUMAN Very long-chain acyl-CoA synthetase	9	5.61186	6.09512	6.22248	6.69116	6.14902	6.3006	6.48421	6.80037	6.74339	6.35397	7.01644	7.09597	5.79599	5.12535	5.86607	5.64798	6.15515	6.43355	6.80244	5.60885	1.04523	1.10516	0.911244	0.0638198	0.144258	-0.134091	0.0720858	0.0435733	0.0492392	0.0597104
sp|O00487|PSDE_HUMAN	PSMD14	PSDE_HUMAN 26S proteasome non-ATPase regulatory subunit 14	20	5.66287	5.96261	5.96571	6.23512	6.49109	6.97518	6.76035	6.7955	6.61387	6.61016	6.57444	6.53331	5.66274	5.32929	6.17801	5.64973	5.95658	6.75553	6.58294	5.70494	1.13413	1.10516	0.957755	0.181585	0.14425	-0.0622713	0.0392486	0.0295801	0.00570614	0.0615368
sp|P78381|S35A2_HUMAN	SLC35A2	S35A2_HUMAN UDP-galactose translocator	3	5.72599	5.94005	6.29857	6.20089	6.36542	6.727	6.93807	6.53394	6.97875	6.43214	6.65821	6.63743	5.45114	5.90142	5.75548	5.4555	6.04138	6.64111	6.67663	5.64089	1.09927	1.10515	0.933709	0.136547	0.144244	-0.0989554	0.0428802	0.0371952	0.0338162	0.0398225
sp|P45985-2|MP2K4_HUMAN	MAP2K4	MP2K4_HUMAN Isoform 2 of Dual specificity mitogen-activated protein kinase kinase 4	10	5.69656	6.05208	5.92354	6.31415	6.57603	6.32902	6.52879	6.77198	6.54647	6.70719	6.59932	6.65479	6.10562	5.40599	5.91732	5.87115	5.99658	6.55145	6.62694	5.82502	1.09253	1.10512	0.97139	0.127675	0.144203	-0.0418775	0.0429799	0.0277597	0.0104742	0.05102
sp|Q96PU4|UHRF2_HUMAN	UHRF2	UHRF2_HUMAN E3 ubiquitin-protein ligase UHRF2	4	5.5738	5.88769	6.04183	6.92209	5.79819	6.43305	6.21071	6.70023	6.5155	7.01061	6.55899	6.90773	5.88707	5.52094	6.03912	5.99243	6.10635	6.28554	6.74821	5.85989	1.02935	1.10511	0.959638	0.041727	0.144193	-0.0594373	0.0945972	0.0607094	0.0367252	0.0400597
sp|Q13564|ULA1_HUMAN	NAE1	ULA1_HUMAN NEDD8-activating enzyme E1 regulatory subunit	22	5.22054	6.08748	6.04637	6.37329	6.11593	6.222	6.47287	6.80591	6.47642	6.18635	6.67307	6.8859	6.26054	5.4472	6.59546	6.13068	5.93192	6.40418	6.55544	6.10847	1.07961	1.10511	1.02976	0.110514	0.144192	0.0423119	0.0836221	0.0479066	0.0453816	0.0789682
sp|Q53R41|FAKD1_HUMAN	FASTKD1	FAKD1_HUMAN FAST kinase domain-containing protein 1	2	5.39906	5.65662	5.73855	7.08271	6.69991	6.14639	6.63193	7.03708	6.36819	6.6545	6.28423	7.07558	6.57776	5.48347	6.04835	5.11568	5.96923	6.62883	6.59563	5.80631	1.1105	1.10494	0.972707	0.151208	0.143963	-0.0399232	0.126696	0.0553924	0.0541388	0.110499
sp|P49189|AL9A1_HUMAN	ALDH9A1	AL9A1_HUMAN 4-trimethylaminobutyraldehyde dehydrogenase	31	5.31059	5.82288	6.02147	6.57876	6.35019	6.49375	6.64397	6.79249	6.48541	6.28718	6.71838	6.73201	5.97539	5.11911	6.51429	6.15413	5.93342	6.5701	6.55574	5.94073	1.1073	1.10488	1.00123	0.14705	0.143895	0.0017751	0.0883467	0.029026	0.0323095	0.0996216
sp|Q96H22-3|CENPN_HUMAN	CENPN	CENPN_HUMAN Isoform 3 of Centromere protein N	1	4.8603	5.12997	7.0316	6.41764	6.58261	6.4376	5.45974	5.8842	6.82451	5.97264	7.05092	6.0466	6.28095	7.4037	6.36786	6.24917	5.85988	6.09104	6.47367	6.57542	1.03945	1.10474	1.12211	0.0558175	0.143713	0.166213	0.176687	0.0849423	0.0841235	0.0843233
sp|Q14534|ERG1_HUMAN	SQLE	ERG1_HUMAN Squalene monooxygenase	11	5.6476	6.12942	5.79201	6.84831	6.26654	6.55225	6.61143	6.66023	6.742	6.46218	6.82153	6.94853	5.73459	5.42932	5.7468	5.60728	6.10434	6.52261	6.74356	5.6295	1.06852	1.10472	0.922213	0.0956158	0.143676	-0.116828	0.0877246	0.0270339	0.030543	0.0262214
sp|Q9Y265|RUVB1_HUMAN	RUVBL1	RUVB1_HUMAN RuvB-like 1	64	5.41552	5.91599	6.05217	6.34501	6.4394	6.49054	6.66575	6.90734	6.61231	6.38552	6.64955	6.56572	6.00039	5.50996	6.20165	5.84318	5.93217	6.62576	6.55327	5.8888	1.11692	1.1047	0.992688	0.159525	0.143656	-0.0105881	0.0654346	0.0318857	0.0178501	0.0495989
sp|Q96Q42|ALS2_HUMAN	ALS2	ALS2_HUMAN Alsin	4	5.12552	5.64691	6.1028	6.82897	6.56595	6.64084	7.05351	6.35628	6.18005	6.093	7.39806	6.51374	6.31454	5.88067	5.83379	5.46538	5.92605	6.65414	6.54621	5.87359	1.12286	1.10465	0.991148	0.167183	0.14359	-0.012827	0.12189	0.0439149	0.0910675	0.0591988
sp|P21980|TGM2_HUMAN	TGM2	TGM2_HUMAN Protein-glutamine gamma-glutamyltransferase 2	13	5.45023	6.25191	5.89984	6.26934	6.31054	6.47921	6.73935	6.87985	6.35057	6.49591	6.84753	6.67514	5.99849	5.41253	6.22197	5.71761	5.96783	6.60224	6.59229	5.83765	1.1063	1.10464	0.978186	0.145749	0.143573	-0.0318187	0.0644739	0.0387238	0.0327376	0.0600541
sp|P23634|AT2B4_HUMAN	ATP2B4	AT2B4_HUMAN Plasma membrane calcium-transporting ATPase 4	11	5.66877	5.91073	5.98947	6.39646	6.18819	6.52388	6.50139	6.99227	6.63812	6.20596	6.90155	6.72724	5.88509	5.23745	6.16379	6.06963	5.99136	6.55143	6.61822	5.83899	1.09348	1.10463	0.974569	0.128927	0.14356	-0.0371641	0.0505038	0.0505896	0.0446967	0.0714848
sp|Q13885|TBB2A_HUMAN	TUBB2A	TBB2A_HUMAN Tubulin beta-2A chain	62	5.5411	6.22326	6.09485	6.4792	6.36943	6.60746	6.62687	6.91157	6.67726	6.51898	6.89482	6.79267	5.65279	5.13971	5.85948	5.61054	6.0846	6.62883	6.72093	5.56563	1.08944	1.10458	0.914707	0.123592	0.143498	-0.128618	0.0650813	0.0334718	0.0240031	0.0546329
sp|P53618|COPB_HUMAN	COPB1	COPB_HUMAN Coatomer subunit beta	46	5.57745	6.17928	6.0048	6.34418	6.50906	6.83342	6.72128	6.71979	6.68228	6.69048	6.70766	6.54445	5.73729	5.13739	5.81569	5.79551	6.02643	6.69589	6.65622	5.62147	1.11109	1.1045	0.932803	0.151972	0.1434	-0.100356	0.0547319	0.020228	0.0113065	0.0577122
sp|Q9UF33|EPHA6_HUMAN	EPHA6	EPHA6_HUMAN Ephrin type-A receptor 6	2	5.39693	6.24438	5.99467	6.08316	6.21703	6.48856	6.76607	6.9737	6.81081	6.11737	6.42352	6.84605	6.01579	5.72639	6.1838	5.71175	5.92978	6.61134	6.54944	5.90943	1.11494	1.1045	0.996568	0.156963	0.143391	-0.00496021	0.0623922	0.0498455	0.0528057	0.0389787
sp|O60930|RNH1_HUMAN	RNASEH1	RNH1_HUMAN Ribonuclease H1	2	5.22168	5.79436	6.07416	6.48996	6.56346	6.23033	6.74439	6.71635	6.68602	6.30653	6.2062	6.845	5.96798	5.45402	6.44738	6.25219	5.89504	6.56363	6.51094	6.03039	1.11342	1.10448	1.02296	0.154993	0.143364	0.0327503	0.0902715	0.0359555	0.0466613	0.0715924
sp|O75446|SAP30_HUMAN	SAP30	SAP30_HUMAN Histone deacetylase complex subunit SAP30	3	5.49271	6.22719	6.29266	6.5828	6.4123	6.2039	6.43895	6.37734	6.7135	6.63752	7.38111	6.4315	5.69968	5.23724	5.99004	5.88155	6.14884	6.35812	6.79091	5.70213	1.03404	1.10442	0.92735	0.0482865	0.14329	-0.108814	0.0754475	0.0166504	0.0605382	0.0582714
sp|Q96A72|MGN2_HUMAN	MAGOHB	MGN2_HUMAN Protein mago nashi homolog 2	13	5.35316	5.92325	6.00295	6.52296	6.20037	6.28854	6.68063	6.96217	6.55718	6.09869	6.91186	6.7193	5.95601	5.3999	6.46261	5.96044	5.95058	6.53293	6.57176	5.94474	1.09786	1.10439	0.999019	0.134699	0.143249	-0.00141658	0.0804786	0.0542185	0.0528176	0.073028
sp|P46100|ATRX_HUMAN	ATRX	ATRX_HUMAN Transcriptional regulator ATRX	3	5.8986	5.98737	5.3546	6.58355	7.54704	6.84628	5.89707	6.57462	6.40312	6.62518	6.93689	6.34541	5.91797	5.97496	5.57344	5.5339	5.95603	6.71625	6.57765	5.75007	1.12764	1.10437	0.965419	0.173305	0.143221	-0.0507721	0.0844941	0.101649	0.0407664	0.0397459
sp|Q14746|COG2_HUMAN	COG2	COG2_HUMAN Conserved oligomeric Golgi complex subunit 2	17	5.5116	6.09209	5.94655	6.7294	6.39194	6.56613	6.73988	6.42731	6.70316	6.41906	6.98777	6.70353	5.83787	5.47344	5.77907	5.69122	6.06991	6.53131	6.70338	5.6954	1.07602	1.10436	0.938301	0.105698	0.143214	-0.091878	0.0830488	0.0242011	0.0346355	0.028053
sp|Q969H4|CNKR1_HUMAN	CNKSR1	CNKR1_HUMAN Connector enhancer of kinase suppressor of ras 1	2	5.45854	6.04406	6.10871	6.14703	6.57013	6.73398	7.0118	6.43925	5.69725	7.13459	7.0509	6.35461	5.52608	5.1053	6.66063	5.95714	5.93959	6.68879	6.55934	5.81229	1.12614	1.10434	0.978568	0.171383	0.143188	-0.0312561	0.054465	0.0368973	0.102559	0.114229
sp|Q96CS3|FAF2_HUMAN	FAF2	FAF2_HUMAN FAS-associated factor 2	17	5.48403	6.10172	5.92206	6.33762	6.42699	6.75757	6.62073	6.91959	6.58976	6.51746	6.5625	6.6635	5.90086	5.39666	6.03467	5.76428	5.96136	6.68122	6.5833	5.77412	1.12075	1.10433	0.968591	0.164471	0.143171	-0.0460404	0.0605333	0.0312696	0.00929831	0.0475893
sp|O14662-2|STX16_HUMAN	STX16	STX16_HUMAN Isoform A of Syntaxin-16	1	4.85354	5.65196	6.14359	6.07495	5.79332	6.23167	6.63532	6.85694	6.65506	6.13109	6.23777	6.07028	6.12315	7.04817	6.61245	6.88073	5.68101	6.37931	6.27355	6.66613	1.12292	1.1043	1.1734	0.167254	0.143135	0.230701	0.104372	0.0734615	0.0420165	0.0606092
sp|Q8IWA0|WDR75_HUMAN	WDR75	WDR75_HUMAN WD repeat-containing protein 75	7	5.4734	6.17938	6.13938	6.72312	6.2658	6.5449	6.70384	6.93282	6.95585	6.44903	6.88341	6.78387	5.69279	5.52672	5.29672	5.44897	6.12882	6.61184	6.76804	5.4913	1.07881	1.1043	0.89598	0.109442	0.143129	-0.158462	0.0834868	0.0423948	0.0331047	0.0300164
sp|Q15334|L2GL1_HUMAN	LLGL1	L2GL1_HUMAN Lethal(2) giant larvae protein homolog 1	14	5.47845	6.19275	6.08042	6.34155	6.1767	6.63013	6.82119	6.73379	6.51561	6.50344	6.8206	6.7663	5.70934	5.37202	6.04643	5.81128	6.02329	6.59045	6.65149	5.73477	1.09416	1.10429	0.952098	0.129825	0.143125	-0.0708173	0.0628638	0.0434988	0.0248803	0.0488271
sp|Q92845|KIFA3_HUMAN	KIFAP3	KIFA3_HUMAN Kinesin-associated protein 3	7	5.70363	6.43825	5.87807	6.47192	6.01107	6.97654	6.67513	6.91888	6.84406	6.82467	7.02978	6.34697	5.57582	5.24052	5.60259	5.46211	6.12297	6.64541	6.76137	5.47026	1.08532	1.10426	0.8934	0.118126	0.143085	-0.162622	0.0637427	0.0666035	0.0430871	0.030131
sp|Q9BRG2|SH23A_HUMAN	SH2D3A	SH23A_HUMAN SH2 domain-containing protein 3A	3	5.81804	5.82106	6.4137	6.04847	5.89613	6.16738	6.54929	6.83346	6.14946	5.97862	7.06538	7.41951	5.75684	5.74814	6.23669	6.09784	6.02532	6.36156	6.65324	5.95988	1.05581	1.10421	0.989139	0.0783445	0.14302	-0.0157546	0.0465557	0.0649564	0.105066	0.0412951
sp|O95271|TNKS1_HUMAN	TNKS	TNKS1_HUMAN Tankyrase-1	8	5.5552	5.87304	6.18749	6.46815	6.10072	6.22771	6.53743	6.35397	6.60815	6.30455	6.87938	6.80129	6.00077	5.9339	6.15339	6.01485	6.02097	6.30496	6.64834	6.02573	1.04717	1.1042	1.00079	0.0664907	0.142999	0.0011395	0.0654953	0.0295486	0.0385031	0.0152917
sp|Q6ZNW5|GDPP1_HUMAN	GDPGP1	GDPP1_HUMAN GDP-D-glucose phosphorylase 1	6	5.55219	6.08542	5.80383	6.87599	6.40098	6.4152	6.43167	7.02836	6.62149	6.53088	6.95526	6.74348	5.71793	5.38027	5.88528	5.57179	6.07936	6.56905	6.71278	5.63882	1.08055	1.10419	0.927535	0.111766	0.142991	-0.108526	0.0944204	0.0466523	0.0273554	0.0380828
sp|Q96HA7-2|TONSL_HUMAN	TONSL	TONSL_HUMAN Isoform 2 of Tonsoku-like protein	5	5.35212	6.14599	6.18035	6.83685	6.15089	6.50563	6.70626	6.94338	6.77283	7.00526	6.46299	6.82831	5.63149	5.25451	5.60102	5.6221	6.12883	6.57654	6.76735	5.52728	1.07305	1.10418	0.901849	0.101718	0.142979	-0.149041	0.0991374	0.0510089	0.0333689	0.0329805
sp|Q9NRA2|S17A5_HUMAN	SLC17A5	S17A5_HUMAN Sialin	2	5.17797	6.51154	6.10684	6.56567	6.27685	6.47258	6.81224	6.76144	6.80745	6.83865	6.78429	6.46948	5.79148	5.22728	5.84375	5.5525	6.09051	6.58078	6.72497	5.60375	1.0805	1.10417	0.92008	0.111696	0.142965	-0.120169	0.105391	0.0382713	0.0255429	0.0501784
sp|Q9NSD9|SYFB_HUMAN	FARSB	SYFB_HUMAN Phenylalanine--tRNA ligase beta subunit	56	5.37722	6.25018	5.91555	6.32919	6.40174	6.71235	6.7324	7.11669	6.38869	6.38477	6.73143	6.854	5.77915	4.99273	6.2688	5.76511	5.96804	6.7408	6.58972	5.70145	1.12948	1.10417	0.955331	0.175663	0.142962	-0.0659278	0.0725138	0.0434319	0.0363722	0.0924922
sp|Q13085-4|ACACA_HUMAN	ACACA	ACACA_HUMAN Isoform 4 of Acetyl-CoA carboxylase 1	84	5.61571	5.95425	5.92225	6.49889	6.67454	6.83741	6.68722	6.66669	6.62073	6.50383	6.62351	6.74072	5.84342	5.54005	5.66882	5.60196	5.99777	6.71647	6.6222	5.66356	1.11983	1.10411	0.944277	0.163275	0.142883	-0.0827176	0.0612364	0.0120707	0.0146049	0.0231176
sp|Q9GZT4|SRR_HUMAN	SRR	SRR_HUMAN Serine racemase	4	6.14445	5.96596	6.09597	6.0334	6.49051	7.00206	6.10544	6.61167	6.45276	6.84641	6.57081	6.89306	5.12563	6.26906	5.67813	5.71467	6.05994	6.55242	6.69076	5.69687	1.08127	1.1041	0.940087	0.112723	0.142865	-0.0891346	0.012774	0.0563721	0.031844	0.0819822
sp|O95340-2|PAPS2_HUMAN	PAPSS2	PAPS2_HUMAN Isoform B of Bifunctional 3'-phosphoadenosine 5'-phosphosulfate synthase 2	15	5.3055	5.87361	6.38894	6.39715	6.24764	6.41426	6.91682	6.80922	6.44317	6.48737	7.08006	6.44915	5.86383	5.23443	6.40585	5.68301	5.9913	6.59699	6.61494	5.79678	1.10109	1.10409	0.967533	0.138938	0.142858	-0.0476173	0.0865678	0.0481559	0.0469693	0.0836059
sp|Q13158|FADD_HUMAN	FADD	FADD_HUMAN Protein FADD	4	5.06948	5.46995	6.41238	6.81983	6.34265	5.72718	6.25458	6.38598	6.63823	6.0462	6.38789	7.17246	5.59987	6.33966	6.7789	6.55477	5.94291	6.1776	6.56119	6.3183	1.03949	1.10404	1.06317	0.0558763	0.142789	0.0883669	0.136562	0.0494067	0.0722861	0.0809435
sp|Q8NI36|WDR36_HUMAN	WDR36	WDR36_HUMAN WD repeat-containing protein 36	15	5.44842	6.26974	6.23188	6.13525	6.40101	7.02271	6.87701	6.68448	6.51764	6.64938	6.85112	6.57234	5.73099	5.37938	5.54516	5.68349	6.02132	6.7463	6.64762	5.58475	1.1204	1.10401	0.927496	0.164017	0.142758	-0.108586	0.0641238	0.0398233	0.0219678	0.028289
sp|Q68CQ4|DIEXF_HUMAN	DIEXF	DIEXF_HUMAN Digestive organ expansion factor homolog	15	5.31535	5.99059	5.94398	6.12672	6.48597	6.81296	6.69981	6.66829	6.12195	6.4443	6.66794	6.57164	6.12161	5.77457	6.30153	5.95278	5.84416	6.66676	6.45146	6.03762	1.14076	1.10392	1.0331	0.18999	0.142629	0.0469849	0.061765	0.0203383	0.0368912	0.0374158
sp|Q9C0C7-5|AMRA1_HUMAN	AMBRA1	AMRA1_HUMAN Isoform 5 of Activating molecule in BECN1-regulated autophagy protein 1	5	5.53238	5.27941	6.3354	6.48887	6.69903	6.93566	6.32359	6.59215	6.4893	6.44526	6.46876	6.68763	5.51051	6.39767	5.73659	6.07779	5.90902	6.63761	6.52274	5.93064	1.1233	1.10386	1.00366	0.167746	0.14256	0.00527014	0.100419	0.0382404	0.0170774	0.0655895
sp|P78382|S35A1_HUMAN	SLC35A1	S35A1_HUMAN CMP-sialic acid transporter	1	5.81345	6.62153	6.17729	5.20287	6.59214	6.26115	6.4126	7.02825	6.49692	5.92589	6.94635	6.9183	6.63448	5.68769	6.08196	5.19913	5.95378	6.57353	6.57187	5.90081	1.10409	1.10381	0.991103	0.142862	0.142496	-0.0128929	0.100748	0.0504998	0.0726124	0.103031
sp|O75396|SC22B_HUMAN	SEC22B	SC22B_HUMAN Vesicle-trafficking protein SEC22b	8	5.56696	5.92647	5.97928	6.31301	6.64462	6.76479	6.79628	6.45251	6.53937	6.27888	6.8933	6.54294	6.1267	5.24461	6.03004	5.90024	5.94643	6.66455	6.56362	5.8254	1.12076	1.10379	0.979646	0.164484	0.142468	-0.0296673	0.051363	0.0233675	0.0384206	0.0683478
sp|Q9Y620|RA54B_HUMAN	RAD54B	RA54B_HUMAN DNA repair and recombination protein RAD54B	5	5.6374	6.1443	6.21068	6.35459	6.29475	6.45995	6.74981	6.70168	6.65639	6.47794	6.75993	6.97973	5.68063	5.4665	5.74051	5.68522	6.08674	6.55155	6.7185	5.64322	1.07636	1.10379	0.927132	0.106165	0.142468	-0.109153	0.0512846	0.0325205	0.0311842	0.021426
sp|Q8N4Q0|ZADH2_HUMAN	ZADH2	ZADH2_HUMAN Zinc-binding alcohol dehydrogenase domain-containing protein 2	9	5.52079	5.75419	5.97826	6.47561	6.06808	6.37195	6.57679	6.45426	6.3008	6.09116	6.75769	7.04116	6.11722	5.77338	6.50127	6.21737	5.93221	6.36777	6.5477	6.15231	1.07342	1.10375	1.0371	0.102218	0.142418	0.0525579	0.0687061	0.0340458	0.0658071	0.0488366
sp|P06730-2|IF4E_HUMAN	EIF4E	IF4E_HUMAN Isoform 2 of Eukaryotic translation initiation factor 4E	11	5.09082	6.16927	6.05672	6.20208	6.20581	6.48486	6.85936	7.13452	6.26795	6.00345	6.84816	6.83944	5.80472	4.91718	6.85531	6.26034	5.87972	6.67114	6.48975	5.95939	1.1346	1.10375	1.01355	0.182185	0.142415	0.019416	0.0900733	0.0612806	0.0651576	0.137125
sp|Q9UQ53-3|MGT4B_HUMAN	MGAT4B	MGT4B_HUMAN Isoform 3 of Alpha-1,3-mannosyl-glycoprotein 4-beta-N-acetylglucosaminyltransferase B	3	5.47496	6.4161	5.90598	5.95697	6.62749	6.62177	6.08566	6.41951	6.63228	6.5429	6.71292	6.33036	5.76621	6.35997	6.06453	6.0824	5.9385	6.43861	6.55462	6.06828	1.08421	1.10375	1.02185	0.11665	0.142412	0.0311879	0.0648089	0.039512	0.0251492	0.039976
sp|Q9Y697|NFS1_HUMAN	NFS1	NFS1_HUMAN Cysteine desulfurase, mitochondrial	14	5.63786	6.01609	6.04698	6.47228	6.43873	6.51627	6.47113	6.58377	6.7237	6.6009	6.79026	6.56549	5.86289	5.47892	6.09708	5.69765	6.0433	6.50247	6.67009	5.78414	1.07598	1.10372	0.957115	0.105652	0.142369	-0.0632359	0.0564517	0.00966341	0.0157344	0.0451686
sp|O14981|BTAF1_HUMAN	BTAF1	BTAF1_HUMAN TATA-binding protein-associated factor 172	26	5.3785	6.08841	6.17712	6.501	6.32026	6.7285	6.61006	6.95669	6.61236	6.60094	6.64172	6.79299	5.84039	5.31295	5.67535	5.76276	6.03626	6.65388	6.662	5.64786	1.10232	1.10366	0.935656	0.140541	0.142302	-0.0959494	0.0783601	0.0398084	0.0133591	0.0412955
sp|P30291|WEE1_HUMAN	WEE1	WEE1_HUMAN Wee1-like protein kinase	2	5.30825	6.14641	6.16245	6.42339	6.53438	6.22485	7.07228	6.79875	6.62257	6.81429	6.54489	6.54844	5.70735	6.07833	5.82109	5.19227	6.01013	6.65756	6.63255	5.69976	1.10772	1.10356	0.94836	0.1476	0.142168	-0.0764938	0.0806696	0.0544576	0.019049	0.0653042
sp|Q6SJ96|TBPL2_HUMAN	TBPL2	TBPL2_HUMAN TATA box-binding protein-like protein 2	3	5.46748	6.62954	5.76265	6.03268	6.73998	6.82501	6.73665	6.63216	6.90839	6.50751	6.39281	6.55759	5.82094	4.84227	5.90065	6.24368	5.97309	6.73345	6.59158	5.70188	1.1273	1.10355	0.954596	0.172869	0.142146	-0.0670379	0.0828339	0.0117239	0.0337077	0.105528
sp|P56192|SYMC_HUMAN	MARS	SYMC_HUMAN Methionine--tRNA ligase, cytoplasmic	45	5.47545	6.11446	5.966	6.54272	6.55638	7.03377	6.76661	7.03887	6.76488	6.52497	6.60431	6.6997	5.65609	5.03896	5.78249	5.43431	6.02466	6.84891	6.64846	5.47796	1.13681	1.10354	0.909257	0.184995	0.142142	-0.13724	0.0730786	0.0339927	0.0158653	0.0595361
sp|Q96T52|IMP2L_HUMAN	IMMP2L	IMP2L_HUMAN Mitochondrial inner membrane protease subunit 2	2	6.67117	5.36047	6.03309	6.06558	6.51244	6.54936	6.26354	6.44722	7.25167	6.53929	6.34535	6.49189	6.09888	5.32138	6.13436	5.91432	6.03258	6.44314	6.65705	5.86723	1.06806	1.10352	0.972592	0.0949894	0.142108	-0.0400938	0.0887854	0.019705	0.0608254	0.0641649
sp|Q14573|ITPR3_HUMAN	ITPR3	ITPR3_HUMAN Inositol 1,4,5-trisphosphate receptor type 3	25	6.02654	6.12051	5.87439	6.56719	6.65409	6.83047	6.53216	6.74338	6.98698	6.57656	6.47994	7.08944	5.45994	5.23754	5.60656	5.21433	6.14716	6.69003	6.78323	5.37959	1.08831	1.10347	0.875135	0.122092	0.142053	-0.192423	0.0484482	0.0190613	0.0442247	0.0348526
sp|O95563|MPC2_HUMAN	MPC2	MPC2_HUMAN Mitochondrial pyruvate carrier 2	6	5.3958	6.32462	6.12846	6.46209	6.56873	6.28627	6.74199	6.65938	6.94684	6.58896	6.66998	6.62064	5.82529	5.1897	5.78152	5.80974	6.07774	6.56409	6.7066	5.65156	1.08002	1.10347	0.929879	0.11106	0.142047	-0.104886	0.0781202	0.0302054	0.0243923	0.0545762
sp|P51812|KS6A3_HUMAN	RPS6KA3	KS6A3_HUMAN Ribosomal protein S6 kinase alpha-3	27	5.43313	6.18658	6.07968	6.43938	6.388	6.66759	6.48405	6.73317	6.71954	6.48369	6.67136	6.76019	5.92116	5.31375	5.92442	5.79431	6.03469	6.5682	6.65869	5.73841	1.08841	1.1034	0.950903	0.122218	0.141959	-0.0726292	0.0710001	0.0243355	0.0183503	0.0504523
sp|Q8TF05|PP4R1_HUMAN	PPP4R1	PP4R1_HUMAN Serine/threonine-protein phosphatase 4 regulatory subunit 1	14	5.49009	6.15473	5.97986	6.60104	6.07651	6.54958	6.55642	6.7312	6.41662	6.53809	6.78541	6.98952	5.86594	5.63489	5.80576	5.82434	6.05643	6.47843	6.68241	5.78273	1.06968	1.10336	0.954809	0.097176	0.141901	-0.0667163	0.0758366	0.0433467	0.0382891	0.0175907
sp|A3KN83|SBNO1_HUMAN	SBNO1	SBNO1_HUMAN Protein strawberry notch homolog 1	31	5.29341	5.97461	6.03785	6.31064	6.20967	6.45191	6.80993	6.76684	6.25307	6.34939	6.63534	6.81929	5.97536	5.36774	6.48824	6.25672	5.90413	6.55959	6.51427	6.02201	1.11102	1.10334	1.01997	0.151881	0.14188	0.0285224	0.0732479	0.0430886	0.0399425	0.0803681
sp|Q9Y314|NOSIP_HUMAN	NOSIP	NOSIP_HUMAN Nitric oxide synthase-interacting protein	22	5.32175	6.15958	6.1373	6.3702	6.3175	6.38533	6.80807	6.81409	6.38244	6.32109	6.90793	6.85578	5.99949	5.30328	5.9147	6.00147	5.99721	6.58125	6.61681	5.80473	1.09739	1.10332	0.967906	0.13407	0.141845	-0.0470607	0.0770975	0.0405455	0.0465191	0.0580114
sp|Q15555|MARE2_HUMAN	MAPRE2	MARE2_HUMAN Microtubule-associated protein RP/EB family member 2	10	5.2315	5.40857	6.36547	5.65341	6.40704	8.43266	6.85532	5.57706	5.19346	6.92635	6.34277	6.53568	5.6911	6.01111	7.69593	5.67256	5.66474	6.81802	6.24957	6.26768	1.20359	1.10324	1.10644	0.267344	0.141747	0.145921	0.0879394	0.17595	0.119168	0.153928
sp|P40818|UBP8_HUMAN	USP8	UBP8_HUMAN Ubiquitin carboxyl-terminal hydrolase 8	17	5.28516	6.00613	6.10673	6.43505	6.16593	6.41629	6.70254	6.89194	6.50583	6.37396	6.70142	6.71003	6.0852	5.41336	6.29536	5.90506	5.95827	6.54417	6.57281	5.92474	1.09834	1.10314	0.994374	0.135318	0.141617	-0.00813983	0.0813448	0.0487585	0.0247509	0.0635281
sp|Q96T23|RSF1_HUMAN	RSF1	RSF1_HUMAN Remodeling and spacing factor 1	2	5.82844	5.59287	6.07988	5.77065	7.69595	5.76191	6.19545	6.80696	7.05219	6.15511	6.29328	6.16981	6.18411	6.34886	6.02477	6.03973	5.81796	6.61507	6.4176	6.14937	1.13701	1.10307	1.05696	0.185243	0.14152	0.0799247	0.034607	0.126751	0.0666254	0.0245816
sp|Q32P41|TRM5_HUMAN	TRMT5	TRM5_HUMAN tRNA (guanine(37)-N1)-methyltransferase	23	5.30152	6.05788	6.2672	6.56526	6.46912	6.6607	6.73738	6.85321	6.58637	6.50964	6.89229	6.69672	5.70222	5.37453	5.71308	5.61287	6.04796	6.6801	6.67125	5.60068	1.10452	1.10306	0.926043	0.14342	0.141508	-0.110849	0.0891911	0.0241593	0.0249072	0.0280872
sp|Q9UI10-2|EI2BD_HUMAN	EIF2B4	EI2BD_HUMAN Isoform 2 of Translation initiation factor eIF-2B subunit delta	3	6.0703	6.18707	5.77282	6.55579	6.29504	6.66718	6.38724	7.05322	7.07603	6.90935	6.32344	6.81021	5.63318	5.71903	5.27037	5.26975	6.14649	6.60067	6.77976	5.47308	1.07389	1.10303	0.89044	0.102849	0.14147	-0.16741	0.0526861	0.0516128	0.0476979	0.0433094
sp|Q9NZM1|MYOF_HUMAN	MYOF	MYOF_HUMAN Myoferlin	177	5.40509	5.95354	6.03266	6.38126	6.37493	6.51371	6.68888	6.93163	6.46936	6.37383	6.80088	6.57685	5.90917	5.26087	6.40492	5.92243	5.94314	6.62729	6.55523	5.87435	1.11512	1.10299	0.988425	0.157194	0.141422	-0.0167961	0.0679721	0.0362351	0.0280032	0.0799295
sp|Q96BX8|MOB3A_HUMAN	MOB3A	MOB3A_HUMAN MOB kinase activator 3A	2	5.26607	6.00982	6.2796	6.57363	5.80134	6.4053	6.69354	6.37413	6.62461	6.37142	6.73779	6.88	5.69416	5.67471	6.53633	6.07756	6.03228	6.31858	6.65346	5.99569	1.04746	1.10298	0.993934	0.0668964	0.1414	-0.0087776	0.0928837	0.0591278	0.0323299	0.0676081
sp|Q9C037|TRIM4_HUMAN	TRIM4	TRIM4_HUMAN Tripartite motif-containing protein 4	5	5.59258	6.03832	5.85214	6.62475	6.33527	6.93305	6.69249	6.55309	6.4825	6.85746	6.7987	6.4516	5.82726	5.12155	6.17172	5.66752	6.02695	6.62847	6.64757	5.69701	1.09981	1.10297	0.945257	0.137249	0.141398	-0.0812219	0.0727492	0.0378181	0.0316199	0.0768026
sp|Q53GA4|PHLA2_HUMAN	PHLDA2	PHLA2_HUMAN Pleckstrin homology-like domain family A member 2	9	5.66678	6.0958	5.92532	6.28504	6.32556	6.60674	6.84263	6.44634	6.3873	6.54667	6.60368	6.90336	5.78747	5.26242	6.24667	6.06821	5.99324	6.55532	6.61025	5.84119	1.09379	1.10295	0.974631	0.129331	0.14137	-0.037072	0.0438138	0.0340945	0.0326459	0.0735562
sp|Q9BVN2|RUSC1_HUMAN	RUSC1	RUSC1_HUMAN RUN and SH3 domain-containing protein 1	3	5.06014	6.18468	6.13507	6.66345	6.56748	7.16935	7.14857	6.18705	5.69798	6.6254	6.95234	7.24204	5.62904	5.56232	5.65674	5.51834	6.01084	6.76811	6.62944	5.59161	1.12599	1.10291	0.930255	0.171188	0.141322	-0.104302	0.112646	0.0705312	0.101082	0.011249
sp|Q9Y6W3|CAN7_HUMAN	CAPN7	CAN7_HUMAN Calpain-7	11	5.73492	6.17049	5.96333	6.11231	6.39748	6.50722	6.76771	6.768	6.52591	6.56583	6.73516	6.62141	5.91687	5.42648	6.13667	5.65021	5.99526	6.6101	6.61208	5.78256	1.10255	1.10288	0.964521	0.14085	0.141281	-0.0521152	0.0324011	0.0283786	0.0137508	0.0535576
sp|Q8TDP1|RNH2C_HUMAN	RNASEH2C	RNH2C_HUMAN Ribonuclease H2 subunit C	3	5.99338	6.10479	5.81691	5.63024	6.52447	6.60009	6.58426	6.65102	6.25243	6.30074	6.32842	7.08553	6.56127	5.15713	6.10604	6.30328	5.88633	6.58996	6.49178	6.03193	1.11954	1.10286	1.02474	0.162901	0.141246	0.0352513	0.035308	0.0079104	0.0611661	0.101504
sp|Q6ZUM4|RHG27_HUMAN	ARHGAP27	RHG27_HUMAN Rho GTPase-activating protein 27	5	5.44728	6.10118	5.99129	6.22283	6.48567	6.59571	6.57687	6.76786	6.44813	6.38946	6.72513	6.64387	6.1082	5.3811	6.16047	5.95494	5.94064	6.60653	6.55165	5.90118	1.11209	1.10285	0.993356	0.153273	0.141238	-0.00961673	0.057609	0.017831	0.0242333	0.0605845
sp|O75386|TULP3_HUMAN	TULP3	TULP3_HUMAN Tubby-related protein 3	2	5.06672	6.12273	6.47208	6.43324	6.25385	6.59725	6.4957	6.40298	6.66555	6.44647	6.77806	6.68143	6.46792	5.16227	6.31574	5.63799	6.02369	6.43744	6.64288	5.89598	1.06869	1.10279	0.978798	0.0958401	0.14116	-0.0309165	0.109046	0.0226582	0.0210843	0.103084
sp|P42226|STAT6_HUMAN	STAT6	STAT6_HUMAN Signal transducer and activator of transcription 6	9	5.38133	6.08452	6.2036	6.67142	6.31579	6.98492	6.65912	6.75232	6.52591	6.56783	7.02235	6.72654	5.50725	4.95035	5.96886	5.67789	6.08522	6.67804	6.71066	5.52609	1.09742	1.10278	0.908117	0.134115	0.141145	-0.13905	0.0876324	0.0415772	0.0335355	0.0775472
sp|Q9Y673|ALG5_HUMAN	ALG5	ALG5_HUMAN Dolichyl-phosphate beta-glucosyltransferase	6	5.36153	5.71024	6.25563	6.53184	6.1107	6.40198	6.90317	7.00086	6.52694	6.21591	6.93827	6.62582	5.96905	5.56177	6.23314	5.65314	5.96481	6.60418	6.57674	5.85428	1.10719	1.10259	0.981469	0.146903	0.140895	-0.0269857	0.0884397	0.0637136	0.0452584	0.0524384
sp|Q96K37|S35E1_HUMAN	SLC35E1	S35E1_HUMAN Solute carrier family 35 member E1	4	5.43116	6.36848	6.25537	6.42667	6.09099	6.53231	6.16646	7.1105	6.73161	6.4687	6.78607	7.00566	5.45888	5.62477	5.89486	5.6475	6.12042	6.47507	6.74801	5.6565	1.05794	1.10254	0.924202	0.081264	0.140831	-0.11372	0.0759716	0.0718765	0.0327048	0.031782
sp|Q9GZZ1|NAA50_HUMAN	NAA50	NAA50_HUMAN N-alpha-acetyltransferase 50	23	5.12729	5.77369	6.17753	6.26245	6.48891	6.329	6.7513	6.78432	6.27643	6.17672	6.69555	6.5856	6.18663	5.33743	6.78445	6.2627	5.83524	6.58838	6.43358	6.1428	1.12907	1.10254	1.05271	0.175132	0.140829	0.074105	0.0887534	0.0330346	0.0383277	0.0975229
sp|A4D1U4|LCHN_HUMAN	LCHN	LCHN_HUMAN Protein LCHN	3	5.4835	6.54338	5.57328	6.34055	6.26683	7.01858	6.73351	7.12098	6.37715	6.03219	6.86181	7.1243	5.55855	5.81919	6.03014	5.11606	5.98518	6.78497	6.59886	5.63098	1.13363	1.10253	0.940822	0.180949	0.140823	-0.0880067	0.0894158	0.0563537	0.0740074	0.0699273
sp|Q96AC1-3|FERM2_HUMAN	FERMT2	FERM2_HUMAN Isoform 3 of Fermitin family homolog 2	27	5.37943	5.69612	6.15226	6.57096	6.12127	6.33007	6.94258	6.8635	6.3932	6.3046	6.7475	6.79209	5.94273	5.53658	6.15028	6.07685	5.94969	6.56436	6.55935	5.92661	1.10331	1.10247	0.99612	0.141838	0.140737	-0.00560798	0.0876848	0.0611731	0.0375578	0.0462071
sp|P18074|ERCC2_HUMAN	ERCC2	ERCC2_HUMAN TFIIH basal transcription factor complex helicase XPD subunit	9	5.52279	6.30733	5.94361	6.50349	6.26168	6.64745	6.74523	7.11806	6.90882	6.29458	6.98131	6.58005	5.7761	5.16624	5.75956	5.48369	6.0693	6.69311	6.69119	5.5464	1.10278	1.10246	0.913844	0.141144	0.140731	-0.12998	0.0711637	0.0525775	0.0473535	0.0516978
sp|Q5XG87|PAPD7_HUMAN	PAPD7	PAPD7_HUMAN DNA polymerase sigma	1	6.00127	5.3746	5.63498	6.12673	5.97354	6.7129	6.93141	6.82004	6.49995	6.42091	5.91482	6.67253	5.94646	6.24868	6.19413	6.52704	5.78439	6.60947	6.37705	6.22908	1.14264	1.10246	1.07688	0.192369	0.140724	0.106852	0.0594265	0.0655483	0.0510538	0.0382447
sp|Q9H497|TOR3A_HUMAN	TOR3A	TOR3A_HUMAN Torsin-3A	2	5.59134	6.30319	5.77207	6.8488	6.3764	7.08252	6.04558	7.00526	6.55421	6.4314	6.38741	7.65381	5.49417	4.89827	6.32369	5.23189	6.12885	6.62744	6.75671	5.487	1.08135	1.10244	0.895275	0.112835	0.140704	-0.159598	0.0925355	0.0755157	0.0891291	0.110947
sp|O15066|KIF3B_HUMAN	KIF3B	KIF3B_HUMAN Kinesin-like protein KIF3B	13	5.36069	5.88635	5.64101	6.96595	5.9365	5.89785	6.32396	6.96617	6.55622	6.02585	6.8824	6.83211	6.2534	5.37773	6.55577	6.53803	5.9635	6.28112	6.57414	6.18123	1.05326	1.1024	1.03651	0.0748625	0.140644	0.0517352	0.117709	0.0788994	0.059726	0.0895121
sp|Q66K74|MAP1S_HUMAN	MAP1S	MAP1S_HUMAN Microtubule-associated protein 1S	13	5.59066	6.05532	5.76864	6.44788	6.58099	6.84118	6.47724	6.78805	6.51951	6.68568	6.47138	6.62917	6.12553	5.42657	5.85335	5.73886	5.96562	6.67187	6.57644	5.78608	1.11838	1.10239	0.969903	0.161417	0.140632	-0.0440876	0.0627216	0.0257147	0.0149483	0.0500138
sp|P50225|ST1A1_HUMAN	SULT1A1	ST1A1_HUMAN Sulfotransferase 1A1	6	5.55594	6.23335	6.14915	6.57123	6.25471	6.61823	6.82494	6.87576	6.99631	6.51238	6.94151	6.56847	5.80909	4.86199	5.55671	5.67023	6.12742	6.64341	6.75467	5.4745	1.08421	1.10237	0.893444	0.116645	0.140606	-0.162551	0.0689351	0.042456	0.0369298	0.0769355
sp|Q8WV60|PTCD2_HUMAN	PTCD2	PTCD2_HUMAN Pentatricopeptide repeat-containing protein 2, mitochondrial	3	5.41702	6.12097	5.95315	6.35459	6.51147	6.75282	6.65509	6.6058	6.55478	6.50879	6.77945	6.4428	5.7252	5.27053	6.31746	6.03008	5.96143	6.63129	6.57146	5.83582	1.11237	1.10233	0.978929	0.153632	0.140554	-0.0307243	0.0668514	0.0151659	0.0222296	0.0767285
sp|P56937|DHB7_HUMAN	HSD17B7	DHB7_HUMAN 3-keto-steroid reductase	1	5.90474	6.34114	5.17581	6.68228	6.13657	6.93458	7.02708	7.31645	7.1571	6.25155	6.55221	6.60951	5.70642	4.74314	5.90473	5.55668	6.02599	6.85367	6.64259	5.47774	1.13735	1.10232	0.909019	0.185678	0.140548	-0.137617	0.107868	0.0736803	0.0567888	0.093115
sp|O43242|PSMD3_HUMAN	PSMD3	PSMD3_HUMAN 26S proteasome non-ATPase regulatory subunit 3	37	5.39505	6.17197	5.79174	6.28762	6.47675	6.55239	6.63501	7.05036	6.55806	6.21483	6.7094	6.5829	6.09491	5.19126	6.33702	5.95074	5.9116	6.67863	6.5163	5.89348	1.12975	1.10229	0.996936	0.176004	0.140505	-0.00442705	0.0683909	0.0383478	0.0324758	0.0839121
sp|Q96HP4|OXND1_HUMAN	OXNAD1	OXND1_HUMAN Oxidoreductase NAD-binding domain-containing protein 1	3	5.56375	6.56343	6.36154	5.86233	6.34394	6.78089	6.90692	7.19472	7.07313	6.25909	6.91783	6.58953	5.78207	4.97265	5.59721	5.23097	6.08776	6.80662	6.7099	5.39572	1.11808	1.10219	0.886323	0.161026	0.140378	-0.174095	0.0750732	0.0519714	0.0539335	0.067334
sp|Q9NS00|C1GLT_HUMAN	C1GALT1	C1GLT_HUMAN Glycoprotein-N-acetylgalactosamine 3-beta-galactosyltransferase 1	7	5.19952	6.13848	5.79969	6.85439	6.01036	6.37567	6.77246	6.90924	6.60737	6.34288	6.80428	6.68691	5.79965	5.2984	6.53956	5.86114	5.99802	6.51693	6.61036	5.87469	1.08651	1.10209	0.979438	0.119707	0.140243	-0.0299742	0.115108	0.0623787	0.029621	0.0867952
sp|Q8IUW5|RELL1_HUMAN	RELL1	RELL1_HUMAN RELT-like protein 1	3	6.33726	6.29675	5.46361	5.20211	6.94182	6.06053	5.87424	7.02465	6.28954	6.62931	6.08993	6.66788	6.53059	6.03974	6.63207	5.91998	5.82493	6.47531	6.41916	6.28059	1.11165	1.10202	1.07823	0.152708	0.140144	0.10866	0.099293	0.0914825	0.0432486	0.0562244
sp|O95470|SGPL1_HUMAN	SGPL1	SGPL1_HUMAN Sphingosine-1-phosphate lyase 1	13	5.73035	6.12421	5.72088	6.46152	6.3535	6.63209	6.52811	6.39678	6.5852	6.47558	6.65323	6.77448	6.00681	5.58797	6.03875	5.93055	6.00924	6.47762	6.62212	5.89102	1.07794	1.10199	0.980327	0.108281	0.140111	-0.0286651	0.059125	0.0195987	0.018905	0.03515
sp|Q5XKP0|QIL1_HUMAN	QIL1	QIL1_HUMAN Protein QIL1	4	5.27377	6.33057	6.38198	6.63626	6.24569	6.31847	6.89444	6.25503	6.4687	6.63667	7.02607	7.00205	5.67175	5.43979	5.99195	5.42681	6.15564	6.42841	6.78337	5.63258	1.04431	1.10198	0.915026	0.0625514	0.140093	-0.128115	0.0979451	0.0485915	0.0405749	0.0469936
sp|P52735-2|VAV2_HUMAN	VAV2	VAV2_HUMAN Isoform 2 of Guanine nucleotide exchange factor VAV2	8	5.41306	6.11369	6.20981	6.54743	6.37596	6.71487	6.61967	7.00372	6.6242	6.66887	6.63617	6.82991	5.76183	5.34293	5.50777	5.63014	6.071	6.67856	6.68979	5.56067	1.10008	1.10193	0.91594	0.137602	0.140027	-0.126676	0.0784767	0.0388616	0.0142462	0.032086
sp|Q8NC60|NOA1_HUMAN	NOA1	NOA1_HUMAN Nitric oxide-associated protein 1	16	5.28509	6.23793	5.99619	6.34058	6.34382	6.51617	6.53815	6.68152	6.6591	6.3807	6.75468	6.49684	5.8733	5.753	6.31476	5.8282	5.96495	6.51991	6.57283	5.94231	1.09304	1.10191	0.996206	0.128344	0.140005	-0.00548436	0.0797451	0.0212288	0.0253367	0.0426108
sp|Q9H0H0|INT2_HUMAN	INTS2	INT2_HUMAN Integrator complex subunit 2	9	5.62013	6.07825	6.09654	6.78175	6.3496	6.82163	6.72059	6.72029	7.31747	6.66791	6.406	6.68816	5.53654	5.16409	5.82451	5.20654	6.14417	6.65303	6.76988	5.43292	1.08282	1.10184	0.88424	0.114793	0.139914	-0.17749	0.0779271	0.0312389	0.057167	0.05699
sp|O43488|ARK72_HUMAN	AKR7A2	ARK72_HUMAN Aflatoxin B1 aldehyde reductase member 2	14	5.27238	5.71904	6.08045	6.06421	6.37656	6.52737	6.57301	6.57278	6.12581	6.21991	6.42363	6.72252	6.32097	5.60647	7.09023	6.30466	5.78402	6.51243	6.37297	6.33058	1.12593	1.10182	1.0945	0.171123	0.139893	0.130266	0.0656357	0.0142938	0.0414427	0.0957458
sp|Q13671|RIN1_HUMAN	RIN1	RIN1_HUMAN Ras and Rab interactor 1	5	5.50781	6.13833	6.09304	6.74402	6.31259	6.64608	6.44861	6.74591	6.62033	6.57936	6.98259	6.79354	5.73618	5.29295	5.67672	5.68192	6.1208	6.5383	6.74395	5.59694	1.06821	1.10181	0.914414	0.0951948	0.139875	-0.129081	0.0825143	0.0297762	0.0273122	0.0365266
sp|Q12904-2|AIMP1_HUMAN	AIMP1	AIMP1_HUMAN Isoform 2 of Aminoacyl tRNA synthase complex-interacting multifunctional protein 1	31	5.45105	6.17826	6.03052	6.40485	6.59762	7.00149	6.61754	6.87346	6.49996	6.65015	6.66492	6.69908	5.62212	5.23385	5.78724	5.68789	6.01617	6.77253	6.62853	5.58277	1.12572	1.10179	0.927962	0.170849	0.139843	-0.107863	0.0676486	0.0291876	0.0132951	0.0434043
sp|Q9BW62|KATL1_HUMAN	KATNAL1	KATL1_HUMAN Katanin p60 ATPase-containing subunit A-like 1	6	5.19521	6.20274	5.91909	6.63646	6.36786	6.75057	6.64747	6.68943	6.35	6.63218	6.86957	6.53966	6.00073	5.60361	6.05343	5.54198	5.98838	6.61383	6.59785	5.79994	1.10445	1.10178	0.968533	0.143322	0.139832	-0.0461272	0.101112	0.0256066	0.0327213	0.0455802
sp|O75083|WDR1_HUMAN	WDR1	WDR1_HUMAN WD repeat-containing protein 1	56	5.449	6.05442	5.87415	6.3061	6.40154	6.48634	6.74334	6.96102	6.50403	6.21119	6.78463	6.59401	5.99256	5.25464	6.3078	6.07521	5.92092	6.64806	6.52347	5.90755	1.12281	1.10177	0.997743	0.167113	0.139818	-0.00326021	0.0609795	0.0382461	0.0366064	0.0770667
sp|Q6NUJ5|PWP2B_HUMAN	PWWP2B	PWP2B_HUMAN PWWP domain-containing protein 2B	1	6.40802	6.1042	5.61729	5.73587	5.77102	6.87839	6.73628	7.78162	7.84469	7.61249	5.86621	4.96881	5.58543	5.15272	5.49247	6.44449	5.96635	6.79183	6.57305	5.66878	1.13836	1.10169	0.950126	0.186952	0.139716	-0.0738098	0.060357	0.121185	0.211002	0.0969466
sp|Q9BYJ9|YTHD1_HUMAN	YTHDF1	YTHD1_HUMAN YTH domain family protein 1	6	5.93723	6.02243	6.0068	6.2148	6.491	6.78546	6.27863	7.20404	6.65893	6.42688	6.74352	6.81083	5.72195	5.01076	5.85691	5.82982	6.04531	6.68978	6.66004	5.60486	1.10661	1.10169	0.927141	0.146142	0.139713	-0.109139	0.0196688	0.059928	0.0251354	0.0714262
sp|P53985|MOT1_HUMAN	SLC16A1	MOT1_HUMAN Monocarboxylate transporter 1	8	5.501	6.04918	6.20528	6.40204	6.47609	6.90431	6.96653	6.96656	6.91901	6.60335	6.71154	6.37976	5.96183	4.86964	5.4184	5.66549	6.03937	6.82837	6.65341	5.47884	1.13064	1.10167	0.907187	0.177143	0.139696	-0.140529	0.0640572	0.0346613	0.0337546	0.084493
sp|P53370|NUDT6_HUMAN	NUDT6	NUDT6_HUMAN Nucleoside diphosphate-linked moiety X motif 6	2	5.3928	6.10036	6.89447	6.48351	5.90437	5.90204	6.42428	6.59559	6.33898	6.29303	7.24506	7.52173	5.71512	5.53911	6.15852	5.49103	6.21779	6.20657	6.8497	5.72594	0.998196	1.10163	0.920898	-0.00260453	0.13964	-0.118887	0.102683	0.0575536	0.0915083	0.0530996
sp|Q7Z3J2|CP062_HUMAN	C16orf62	CP062_HUMAN UPF0505 protein C16orf62	19	5.53913	5.9793	6.0099	6.62559	6.41337	6.47257	6.58082	6.74769	6.62426	6.40829	6.89733	6.67865	5.77285	5.43384	6.16114	5.65527	6.03848	6.55361	6.65213	5.75577	1.08531	1.10162	0.953183	0.118105	0.139631	-0.0691752	0.0739598	0.0223984	0.0301982	0.0529219
sp|P35998|PRS7_HUMAN	PSMC2	PRS7_HUMAN 26S protease regulatory subunit 7	49	5.4501	6.20194	6.0131	6.27749	6.30615	6.64291	6.37236	6.84947	6.72603	6.36415	6.61084	6.67444	6.18929	5.19418	6.18008	5.94747	5.98566	6.54272	6.59387	5.87775	1.09307	1.10161	0.981973	0.128381	0.139615	-0.0262445	0.0624746	0.0383753	0.0242992	0.0798351
sp|Q8N4H5-2|TOM5_HUMAN	TOMM5	TOM5_HUMAN Isoform 2 of Mitochondrial import receptor subunit TOM5 homolog	2	5.65096	5.42807	4.45821	5.92037	6.55943	8.11841	7.43271	4.53751	5.66262	6.38234	5.39459	6.19646	7.3242	8.1922	6.45727	6.28464	5.3644	6.66202	5.909	7.06458	1.24189	1.10152	1.31694	0.312541	0.139497	0.397186	0.118704	0.233172	0.0776757	0.124374
sp|Q6PJ69|TRI65_HUMAN	TRIM65	TRI65_HUMAN Tripartite motif-containing protein 65	5	5.35305	6.21412	5.85642	6.63947	6.40715	6.5586	6.72729	6.62313	6.17792	6.68105	6.96118	6.68532	6.31571	5.51355	5.79401	5.49204	6.01577	6.57904	6.62637	5.77883	1.09363	1.1015	0.960614	0.129129	0.13947	-0.0579714	0.0906898	0.0203711	0.0492623	0.0663536
sp|Q9Y5N6|ORC6_HUMAN	ORC6	ORC6_HUMAN Origin recognition complex subunit 6	5	5.19569	5.91578	6.21321	6.53982	5.96793	6.35246	6.53941	6.81449	6.26355	6.6092	6.55635	6.85728	6.1938	5.6571	6.26742	6.05651	5.96612	6.41857	6.57159	6.04371	1.07584	1.10148	1.013	0.105458	0.139449	0.0186396	0.0961053	0.0553614	0.0370823	0.0450311
sp|Q96FK6|WDR89_HUMAN	WDR89	WDR89_HUMAN WD repeat-containing protein 89	4	5.5195	6.02733	6.17403	5.96539	6.50719	6.89334	6.95751	7.51437	6.80297	6.17863	6.51526	6.59095	5.92025	5.09676	5.97372	5.36281	5.92156	6.9681	6.52195	5.58838	1.17673	1.10139	0.943735	0.234788	0.139326	-0.0835465	0.0476155	0.0595499	0.0397518	0.0767019
sp|Q8N4C8|MINK1_HUMAN	MINK1	MINK1_HUMAN Misshapen-like kinase 1	3	5.69483	5.97388	5.48326	6.87836	6.14354	6.93331	6.58799	7.32264	6.56931	6.66777	6.39338	6.83556	5.85078	5.44831	5.35564	5.86145	6.00758	6.74687	6.61651	5.62904	1.12306	1.10136	0.93699	0.167434	0.139285	-0.0938944	0.102255	0.0743807	0.0279536	0.0470682
sp|Q9BTW9-4|TBCD_HUMAN	TBCD	TBCD_HUMAN Isoform 4 of Tubulin-specific chaperone D	30	5.47768	6.37619	6.03993	6.54953	6.36679	6.96756	6.8066	6.87067	6.89783	6.63811	6.76514	6.6197	5.62864	5.019	5.52789	5.44873	6.11083	6.75291	6.7302	5.40606	1.10507	1.10135	0.884669	0.144139	0.139279	-0.17679	0.0772646	0.0393575	0.0191843	0.049637
sp|O60427|FADS1_HUMAN	FADS1	FADS1_HUMAN Fatty acid desaturase 1	5	5.28302	5.96783	6.48177	6.65192	6.47709	6.51888	6.66147	7.02755	6.9785	6.41474	6.7926	6.67007	5.49462	5.50963	5.70436	5.36594	6.09614	6.67125	6.71398	5.51864	1.09434	1.10135	0.905268	0.130062	0.139273	-0.143583	0.100908	0.0375202	0.0352069	0.0252967
sp|Q5T9A4|ATD3B_HUMAN	ATAD3B	ATD3B_HUMAN ATPase family AAA domain-containing protein 3B	16	5.69847	6.68005	5.90936	6.49185	6.76305	7.30726	6.66975	6.5158	7.04341	6.95382	6.54966	6.742	5.42401	4.88574	5.25692	5.10886	6.19493	6.81396	6.82222	5.16888	1.09993	1.10126	0.834373	0.137406	0.139153	-0.261236	0.0752261	0.0505289	0.0324433	0.0442035
sp|O00139-4|KIF2A_HUMAN	KIF2A	KIF2A_HUMAN Isoform 4 of Kinesin-like protein KIF2A	14	5.89261	6.08839	5.99027	6.23384	6.61811	6.94258	6.40512	6.75613	6.87506	6.76367	6.47609	6.54031	5.84367	5.37624	5.68266	5.51525	6.05128	6.68049	6.66378	5.60445	1.10398	1.10122	0.926161	0.142713	0.139102	-0.110666	0.0240621	0.0339296	0.0280866	0.0361849
sp|Q684P5|RPGP2_HUMAN	RAP1GAP2	RPGP2_HUMAN Rap1 GTPase-activating protein 2	6	5.77744	5.9824	6.14131	6.21939	6.03098	6.26235	6.47688	6.62045	6.34393	6.14881	7.09946	6.96946	6.16814	5.41548	6.17082	6.17268	6.03014	6.34766	6.64042	5.98178	1.05266	1.10121	0.991981	0.0740357	0.139083	-0.0116154	0.032371	0.0405414	0.0700202	0.0631146
sp|Q14934-2|NFAC4_HUMAN	NFATC4	NFAC4_HUMAN Isoform 2 of Nuclear factor of activated T-cells, cytoplasmic 4	3	5.8228	5.70869	6.72436	5.98733	6.04301	5.62277	6.40174	6.80997	7.03896	6.43806	7.5749	5.64431	6.48424	6.0493	5.67904	5.97051	6.06079	6.21937	6.67406	6.04577	1.02616	1.10119	0.997521	0.037262	0.139057	-0.00358035	0.0753899	0.0814113	0.124183	0.0550596
sp|Q13155|AIMP2_HUMAN	AIMP2	AIMP2_HUMAN Aminoacyl tRNA synthase complex-interacting multifunctional protein 2	17	5.5005	6.30171	5.78223	6.63936	6.42449	7.03391	6.72078	6.82732	6.47936	6.62111	6.70901	6.86426	5.61821	4.96675	6.00636	5.50462	6.05595	6.75162	6.66844	5.52398	1.11487	1.10114	0.912158	0.156881	0.138995	-0.132644	0.0844256	0.0376046	0.0241777	0.0776843
sp|P49005|DPOD2_HUMAN	POLD2	DPOD2_HUMAN DNA polymerase delta subunit 2	14	5.41195	6.28408	5.8732	6.29857	6.23802	6.58224	6.75519	6.83086	6.63474	6.3254	6.64953	6.67183	5.9113	5.50508	6.09087	5.93712	5.96695	6.60158	6.57038	5.86109	1.10636	1.10113	0.982259	0.145817	0.138982	-0.0258241	0.0702651	0.0399548	0.0249646	0.0426932
sp|P50395|GDIB_HUMAN	GDI2	GDIB_HUMAN Rab GDP dissociation inhibitor beta	36	5.24517	5.66804	6.04906	6.38942	6.37145	6.34149	6.83403	7.18333	6.30583	6.12805	6.65515	6.6238	6.11447	5.4483	6.55323	6.08917	5.83792	6.68257	6.42821	6.05129	1.14468	1.10111	1.03655	0.194949	0.138961	0.0517883	0.0844361	0.0602816	0.039644	0.075184
sp|P60484|PTEN_HUMAN	PTEN	PTEN_HUMAN Phosphatidylinositol 3,4,5-trisphosphate 3-phosphatase and dual-specificity protein phosphatase PTEN	8	5.14899	5.99641	6.18493	6.55771	6.30065	6.6573	6.66504	7.01938	6.29546	6.51744	6.73179	6.7568	5.60719	5.53982	5.99788	6.02319	5.97201	6.66059	6.57537	5.79202	1.1153	1.10103	0.969861	0.157434	0.138856	-0.04415	0.0998311	0.0440559	0.0327466	0.0438576
sp|Q14566|MCM6_HUMAN	MCM6	MCM6_HUMAN DNA replication licensing factor MCM6	46	5.36193	6.03779	6.13939	6.21885	6.41026	6.61784	6.56232	6.58676	6.3979	6.54127	6.65149	6.56678	6.08246	5.69734	6.17628	5.95136	5.93949	6.54429	6.53936	5.97686	1.10183	1.101	1.00629	0.139899	0.13881	0.00904869	0.0660167	0.0140886	0.0161207	0.0347887
sp|Q8IUI8|CRLF3_HUMAN	CRLF3	CRLF3_HUMAN Cytokine receptor-like factor 3	9	5.27224	5.8288	6.18604	6.47971	5.97135	6.39978	6.37793	7.12133	6.55367	6.19415	6.74075	6.67787	5.98539	5.59166	6.32913	6.29019	5.9417	6.4676	6.54161	6.04909	1.08851	1.10097	1.01807	0.122355	0.138771	0.0258436	0.0874566	0.0739508	0.0373508	0.0564535
sp|Q96EX3|WDR34_HUMAN	WDR34	WDR34_HUMAN WD repeat-containing protein 34	5	5.35882	6.03448	7.06921	5.2625	6.18776	6.17399	6.39666	6.62266	6.70671	6.39602	6.07458	6.94214	6.18134	6.36979	5.93653	6.2868	5.93125	6.34527	6.52986	6.19362	1.0698	1.10092	1.04423	0.0973442	0.138716	0.0624449	0.140404	0.0332742	0.0577386	0.0303442
sp|O14976|GAK_HUMAN	GAK	GAK_HUMAN Cyclin-G-associated kinase	26	5.42682	6.24105	6.01457	6.34651	6.31372	6.63921	6.58253	6.69803	6.53577	6.44134	6.74405	6.73275	5.9281	5.42957	6.02944	5.89654	6.00724	6.55837	6.61348	5.82091	1.09175	1.10092	0.968983	0.126636	0.138707	-0.0454564	0.0684141	0.0258878	0.0225875	0.0458663
sp|Q92621|NU205_HUMAN	NUP205	NU205_HUMAN Nuclear pore complex protein Nup205	39	5.65492	6.2547	6.05349	6.70825	6.51218	6.95474	6.51591	6.98478	6.91487	6.64144	6.81976	6.78463	5.50184	5.11365	5.29496	5.28988	6.16784	6.7419	6.79017	5.30008	1.09307	1.1009	0.859309	0.12839	0.138683	-0.218751	0.071027	0.0390687	0.0167002	0.0299501
sp|Q96DM3|MIC1_HUMAN	C18orf8	MIC1_HUMAN Uncharacterized protein C18orf8	8	5.72245	6.11948	5.8092	6.51213	6.50579	6.34917	6.37078	6.7242	7.09604	6.48992	6.50499	6.51017	5.92774	5.29485	6.11901	5.94407	6.04082	6.48749	6.65028	5.82142	1.07394	1.10089	0.963681	0.102916	0.138672	-0.0533727	0.0591737	0.0265675	0.0447045	0.062109
sp|Q86TU7|SETD3_HUMAN	SETD3	SETD3_HUMAN Histone-lysine N-methyltransferase setd3	26	5.44856	5.97307	6.0916	6.26822	6.29931	6.14439	6.42936	6.5792	6.52014	6.31521	6.75625	6.58918	6.28899	5.75958	6.42738	6.10954	5.94536	6.36306	6.54519	6.14637	1.07026	1.10089	1.03381	0.0979571	0.138671	0.0479704	0.0593244	0.029119	0.0278943	0.0469921
sp|Q9UHE8|STEA1_HUMAN	STEAP1	STEA1_HUMAN Metalloreductase STEAP1	1	5.12742	6.24453	5.94833	6.61617	6.14735	7.36314	6.20169	6.53039	6.01882	6.93733	6.61562	6.77838	5.91415	5.65436	5.94098	5.96135	5.98411	6.56064	6.58754	5.86771	1.09634	1.10084	0.980548	0.1327	0.138602	-0.0283397	0.1058	0.0855286	0.0609104	0.0244628
sp|Q99873|ANM1_HUMAN	PRMT1	ANM1_HUMAN Protein arginine N-methyltransferase 1	98	5.45917	5.83359	5.90823	6.42004	6.52658	6.58809	6.66085	6.92208	6.58733	6.25922	6.57888	6.5763	6.07743	5.43323	6.23992	5.92907	5.90526	6.6744	6.50043	5.91991	1.13025	1.10079	1.00248	0.176638	0.138536	0.00357588	0.0669656	0.0260699	0.0247487	0.0588532
sp|Q86YC2|PALB2_HUMAN	PALB2	PALB2_HUMAN Partner and localizer of BRCA2	1	5.97162	4.82994	6.96525	6.16599	7.07443	5.67314	6.16687	5.67146	6.2392	6.31847	6.82536	6.96118	6.68867	4.93617	6.19702	7.31521	5.9832	6.14647	6.58605	6.28427	1.02729	1.10076	1.05032	0.038842	0.138497	0.0708273	0.14723	0.107559	0.0547379	0.160484
sp|Q9Y3E0|GOT1B_HUMAN	GOLT1B	GOT1B_HUMAN Vesicle transport protein GOT1B	4	5.28637	6.2367	6.10402	6.17512	6.07755	6.41048	6.44399	6.51307	6.25804	6.37268	6.68224	6.88725	6.26913	5.82691	6.21958	6.23689	5.95055	6.36127	6.55005	6.13813	1.06902	1.10075	1.03152	0.0962918	0.138483	0.044775	0.0749669	0.0304831	0.0438874	0.0339667
sp|Q7L1T6|NB5R4_HUMAN	CYB5R4	NB5R4_HUMAN Cytochrome b5 reductase 4	8	5.53692	6.00324	6.1981	6.405	6.49614	6.29191	6.62898	6.28107	6.40689	6.78353	6.72524	6.65906	6.1618	5.77338	5.78411	5.86464	6.03582	6.42452	6.64368	5.89598	1.0644	1.10071	0.976833	0.0900412	0.138434	-0.0338163	0.0614417	0.0262153	0.0249632	0.0308399
tr|Q8NA48|Q8NA48_HUMAN	FAM71F1	Q8NA48_HUMAN HCG2039358, isoform CRA_b	1	5.31113	6.13044	7.06178	6.81265	6.02178	6.44363	6.94928	6.41252	7.41758	6.542	7.6769	6.22899	5.56081	4.99456	5.69063	4.74531	6.329	6.4568	6.96637	5.24783	1.02019	1.10071	0.829172	0.0288423	0.138429	-0.270257	0.123955	0.0589011	0.0991846	0.0859753
sp|P49441|INPP_HUMAN	INPP1	INPP_HUMAN Inositol polyphosphate 1-phosphatase	6	5.5448	5.80252	5.99368	6.88532	6.57856	6.46521	6.69522	6.97278	6.36001	6.56536	7.05044	6.68909	5.76859	5.25033	5.8118	5.56629	6.05658	6.67794	6.66623	5.59925	1.10259	1.10066	0.924491	0.1409	0.138367	-0.113269	0.0961439	0.0326205	0.0434844	0.0457293
sp|P50453|SPB9_HUMAN	SERPINB9	SPB9_HUMAN Serpin B9	21	5.32243	6.07089	6.03601	6.41354	6.27132	6.57299	6.67552	6.90382	6.24593	6.34148	6.93143	6.72295	5.93669	5.22551	6.33192	5.99758	5.96072	6.60591	6.56045	5.87292	1.10824	1.10061	0.985271	0.148272	0.138308	-0.0214068	0.0768958	0.0397286	0.0490703	0.0792228
sp|Q8NFG4|FLCN_HUMAN	FLCN	FLCN_HUMAN Folliculin	5	5.72696	6.61257	6.03684	5.69908	6.35986	6.43347	6.6723	6.77545	6.38158	6.31906	6.76003	7.03697	5.98126	5.92209	5.98352	5.29897	6.01886	6.56027	6.62441	5.79646	1.08995	1.10061	0.963049	0.124264	0.138301	-0.0543188	0.0705073	0.0298571	0.0508797	0.0574277
sp|Q7Z5U6|WDR53_HUMAN	WDR53	WDR53_HUMAN WD repeat-containing protein 53	1	5.39302	6.17515	4.49572	7.11689	7.30057	5.95158	5.90711	5.79162	6.23847	5.9547	6.61614	6.70321	6.29689	6.0472	7.38671	6.625	5.79519	6.23772	6.37813	6.58895	1.07636	1.10059	1.13697	0.106162	0.138276	0.185191	0.192709	0.114107	0.0543969	0.0883445
sp|Q8NB78|KDM1B_HUMAN	KDM1B	KDM1B_HUMAN Lysine-specific histone demethylase 1B	9	5.29288	6.05603	6.26175	6.44508	6.20903	5.99591	6.46916	6.49613	6.63272	6.53512	6.87698	6.43053	5.96474	5.69288	6.41829	6.22277	6.01394	6.29256	6.61884	6.07467	1.04633	1.10058	1.0101	0.0653372	0.138269	0.0144968	0.0841862	0.0375628	0.028838	0.0518705
sp|Q53HC9|TSSC1_HUMAN	TSSC1	TSSC1_HUMAN Protein TSSC1	10	5.33383	6.19429	6.04519	6.3507	6.22705	6.62231	7.01546	6.70461	6.53563	6.68758	6.6761	6.43096	5.98026	5.32374	6.08367	5.78863	5.981	6.64236	6.58257	5.79408	1.11058	1.10058	0.968746	0.151308	0.138263	-0.045809	0.0750907	0.048858	0.0185984	0.0580832
sp|Q5HYI8|RABL3_HUMAN	RABL3	RABL3_HUMAN Rab-like protein 3	3	5.57195	6.17841	5.90359	6.05913	6.71324	8.01	7.10893	5.98836	6.56352	6.48812	6.48665	6.55962	5.62468	5.38718	6.09017	5.26645	5.92827	6.95513	6.52448	5.59212	1.17321	1.10057	0.943297	0.230467	0.138251	-0.0842158	0.0443381	0.121138	0.0065698	0.065066
sp|Q8NBA8|DTWD2_HUMAN	DTWD2	DTWD2_HUMAN DTW domain-containing protein 2	2	6.10134	5.19468	6.31965	7.19756	6.63579	6.66668	6.93941	5.78923	6.06854	7.19427	7.41775	6.62772	5.97163	5.24851	5.50921	5.11803	6.20331	6.50778	6.82707	5.46185	1.04908	1.10055	0.880473	0.0691273	0.138229	-0.183649	0.1326	0.0765363	0.088649	0.0689804
sp|Q5T4S7-2|UBR4_HUMAN	UBR4	UBR4_HUMAN Isoform 2 of E3 ubiquitin-protein ligase UBR4	97	5.50093	6.16058	5.93685	6.68939	6.40302	6.84422	6.66889	6.96121	6.79164	6.53359	6.68967	6.71483	5.74016	5.17537	5.62642	5.56323	6.07194	6.71934	6.68243	5.5263	1.10662	1.10054	0.910137	0.146162	0.138216	-0.135844	0.0814298	0.0361186	0.0162057	0.0443582
sp|Q5K4L6|S27A3_HUMAN	SLC27A3	S27A3_HUMAN Long-chain fatty acid transport protein 3	2	5.99731	6.46654	5.37719	6.12136	6.09839	7.40807	6.70055	7.07831	6.42817	6.47037	6.59394	6.87909	5.62721	4.90396	6.05633	5.79322	5.9906	6.82133	6.59289	5.59518	1.13867	1.10054	0.933993	0.187353	0.138211	-0.098516	0.0758825	0.0823887	0.030844	0.0882047
sp|Q13332-3|PTPRS_HUMAN	PTPRS	PTPRS_HUMAN Isoform PTPS-MEB of Receptor-type tyrosine-protein phosphatase S	9	5.33526	5.88889	6.24337	6.68137	6.1543	5.96621	6.23154	6.78349	6.28599	6.34152	7.12439	6.8244	5.74773	6.08412	6.09641	6.21103	6.03722	6.28388	6.64407	6.03482	1.04086	1.10052	0.999602	0.0577718	0.138183	-0.000573634	0.094292	0.0558913	0.0603909	0.0330988
sp|Q6PIW4|FIGL1_HUMAN	FIGNL1	FIGL1_HUMAN Fidgetin-like protein 1	9	5.58306	5.96326	5.91444	6.49871	6.26279	6.48375	6.61632	6.35381	6.54759	6.09896	6.78201	6.93872	6.04979	5.37622	6.56579	5.96478	5.98987	6.42917	6.59182	5.98914	1.07334	1.1005	0.999879	0.102108	0.138153	-0.000174029	0.0632652	0.0239899	0.0554896	0.0813687
sp|Q9Y6K0|CEPT1_HUMAN	CEPT1	CEPT1_HUMAN Choline/ethanolaminephosphotransferase 1	4	5.86198	5.98777	6.25728	6.53771	6.69197	6.30272	6.43207	6.98036	7.21947	6.70064	6.79929	6.40141	5.83552	5.65123	5.1574	5.18318	6.16119	6.60178	6.7802	5.45683	1.07151	1.10047	0.885679	0.0996472	0.138121	-0.175144	0.0487462	0.0454167	0.0498803	0.0622119
sp|A3KMH1|VWA8_HUMAN	VWA8	VWA8_HUMAN von Willebrand factor A domain-containing protein 8	32	5.58765	6.35425	5.91849	6.48044	6.47036	6.84683	6.6208	6.87806	6.8778	6.53097	6.64399	6.73291	5.7535	5.23726	5.48692	5.57977	6.08521	6.70401	6.69642	5.51436	1.10169	1.10044	0.906191	0.139718	0.138083	-0.142112	0.0673532	0.0288479	0.0218716	0.0390353
sp|Q7Z3D6-2|CN159_HUMAN	C14orf159	CN159_HUMAN Isoform 2 of UPF0317 protein C14orf159, mitochondrial	18	5.53577	6.05164	6.04679	6.45602	6.19461	6.27239	6.58081	6.68627	6.58564	6.2915	6.89172	6.74004	6.02814	5.31986	6.29848	6.02032	6.02255	6.43352	6.62723	5.9167	1.06824	1.1004	0.982424	0.0952326	0.138029	-0.0255829	0.0625905	0.0368504	0.0386793	0.070712
sp|O95352|ATG7_HUMAN	ATG7	ATG7_HUMAN Ubiquitin-like modifier-activating enzyme ATG7	15	5.63581	5.89788	5.97918	6.34278	6.32341	6.39581	6.64515	6.64829	6.76282	6.11966	6.57911	6.78775	6.24504	5.57027	6.2841	5.78294	5.96391	6.50317	6.56234	5.97059	1.09042	1.10034	1.00112	0.124883	0.13795	0.00161381	0.0489605	0.0258924	0.0471531	0.0587466
sp|Q9H0C8|ILKAP_HUMAN	ILKAP	ILKAP_HUMAN Integrin-linked kinase-associated serine/threonine phosphatase 2C	18	5.1676	6.12734	6.06425	6.23681	6.04374	6.12962	6.65007	7.13157	6.13002	6.00889	6.92518	6.89904	6.08859	5.07666	6.89023	6.43037	5.899	6.48875	6.49078	6.12146	1.09997	1.10032	1.03771	0.13747	0.137922	0.053406	0.0835369	0.0778867	0.0753577	0.125802
sp|Q16537|2A5E_HUMAN	PPP2R5E	2A5E_HUMAN Serine/threonine-protein phosphatase 2A 56 kDa regulatory subunit epsilon isoform	10	5.51978	6.17634	5.82666	6.47916	6.31827	7.16005	6.46808	6.9656	6.21404	6.80437	6.54621	6.84458	5.75465	5.42674	5.85645	5.63901	6.00049	6.728	6.6023	5.66921	1.12124	1.10029	0.944792	0.165099	0.13789	-0.0819308	0.0694731	0.0593637	0.0440218	0.0325349
sp|Q9Y4L1|HYOU1_HUMAN	HYOU1	HYOU1_HUMAN Hypoxia up-regulated protein 1	80	5.3574	6.00583	6.20754	6.23944	6.28517	6.39219	6.64624	6.78672	6.3976	6.354	6.81464	6.62855	5.99128	5.57589	6.38452	5.93297	5.95255	6.52758	6.5487	5.97117	1.0966	1.10015	1.00313	0.13304	0.1377	0.004504	0.0688827	0.0351937	0.0327319	0.0554571
sp|Q92540-4|SMG7_HUMAN	SMG7	SMG7_HUMAN Isoform 4 of Protein SMG7	5	5.59256	5.89623	6.27584	6.44027	6.10043	6.30758	6.75067	6.90839	6.44118	6.41082	6.88522	6.89019	5.93114	5.49266	5.74421	5.93261	6.05123	6.51677	6.65685	5.77515	1.07693	1.10008	0.954378	0.106929	0.137613	-0.0673676	0.0630146	0.0577685	0.0400882	0.0360292
sp|Q12873-3|CHD3_HUMAN	CHD3	CHD3_HUMAN Isoform 3 of Chromodomain-helicase-DNA-binding protein 3	22	5.5921	6.36516	5.93028	6.14518	6.47907	6.93633	6.49553	6.68361	6.55983	6.72839	6.60736	6.5422	5.8629	5.34642	6.00279	5.72286	6.00818	6.64864	6.60945	5.73374	1.1066	1.10007	0.954323	0.14613	0.137601	-0.0674509	0.0548153	0.0320458	0.0126994	0.0492478
sp|Q9NX46|ARHL2_HUMAN	ADPRHL2	ARHL2_HUMAN Poly(ADP-ribose) glycohydrolase ARH3	14	5.39996	5.85314	6.12226	6.28504	6.01056	6.4728	6.77074	7.07667	6.43777	6.10455	6.98765	6.49782	5.96369	5.16023	6.89395	5.96316	5.9151	6.58269	6.50695	5.99526	1.11286	1.10006	1.01355	0.154275	0.137578	0.0194192	0.0654019	0.0689932	0.0559669	0.118217
sp|P68371|TBB4B_HUMAN	TUBB4B	TBB4B_HUMAN Tubulin beta-4B chain	35	5.75287	6.23503	5.99643	6.1643	6.49993	6.52429	6.52118	7.05664	6.64716	6.54059	6.58635	6.79019	5.86942	5.25402	5.89234	5.66927	6.03716	6.65051	6.64107	5.67126	1.1016	1.10003	0.939393	0.139596	0.137547	-0.0901995	0.0354998	0.0407442	0.0163487	0.0521323
sp|O43824|GTPB6_HUMAN	GTPBP6	GTPB6_HUMAN Putative GTP-binding protein 6	5	5.83063	6.45549	6.00117	6.3792	6.54237	6.39286	6.27574	6.69351	6.84814	6.71155	6.87755	6.69557	5.47668	5.86236	5.56998	5.38719	6.16662	6.47612	6.7832	5.57405	1.05019	1.09999	0.903907	0.0706492	0.137486	-0.145754	0.0485497	0.0280126	0.0137063	0.0369901
sp|Q8IUH5|ZDH17_HUMAN	ZDHHC17	ZDH17_HUMAN Palmitoyltransferase ZDHHC17	8	5.64672	6.0375	6.55894	5.79124	6.52752	6.1693	7.03573	6.91072	6.78838	6.57996	6.44017	6.62848	6.08384	5.67266	5.44202	5.68682	6.0086	6.66082	6.60925	5.72133	1.10855	1.09996	0.952191	0.14867	0.137457	-0.0706771	0.0667037	0.0589394	0.0217342	0.0465714
sp|Q9Y2S2|CRYL1_HUMAN	CRYL1	CRYL1_HUMAN Lambda-crystallin homolog	7	5.5115	6.23904	5.99754	6.29807	6.2003	6.48974	6.39695	6.74441	6.29964	6.48124	6.5781	7.09035	5.87501	5.44445	6.11116	6.2425	6.01154	6.45785	6.61233	5.91828	1.07424	1.09994	0.984487	0.10332	0.137425	-0.0225561	0.0595211	0.03499	0.0512583	0.059236
sp|P46977|STT3A_HUMAN	STT3A	STT3A_HUMAN Dolichyl-diphosphooligosaccharide--protein glycosyltransferase subunit STT3A	25	5.5581	6.15107	5.95662	6.64972	6.41753	6.81749	6.88716	7.12867	6.68771	6.579	6.69945	6.77845	5.62874	5.0093	5.62471	5.42629	6.07888	6.81271	6.68615	5.42226	1.12072	1.0999	0.891984	0.164424	0.137371	-0.164911	0.0746172	0.0433419	0.0122665	0.0536813
sp|Q0VDF9|HSP7E_HUMAN	HSPA14	HSP7E_HUMAN Heat shock 70 kDa protein 14	22	5.43004	6.14494	6.21529	6.31547	6.3669	6.57384	6.90066	6.82705	6.61392	6.4658	6.77891	6.65493	5.85773	4.90808	6.25275	5.69368	6.02644	6.66711	6.62839	5.67806	1.10631	1.09989	0.942192	0.145757	0.137354	-0.0859067	0.0669893	0.0366328	0.0194778	0.0994012
sp|Q12874|SF3A3_HUMAN	SF3A3	SF3A3_HUMAN Splicing factor 3A subunit 3	18	5.22313	6.03389	6.47712	6.36547	6.34824	6.43608	6.88453	6.8621	6.63923	6.38291	6.89101	6.59349	5.90289	4.93429	6.12678	5.89885	6.0249	6.63274	6.62666	5.7157	1.10089	1.09988	0.94868	0.138667	0.137344	-0.0760071	0.0940577	0.0422525	0.0314803	0.0930276
sp|Q01650|LAT1_HUMAN	SLC7A5	LAT1_HUMAN Large neutral amino acids transporter small subunit 1	7	5.72479	5.92381	5.97426	5.85784	6.81042	8.24664	7.32761	6.11281	6.11175	6.9833	6.75399	5.97654	5.54017	5.58865	5.86612	5.20129	5.87017	7.12437	6.4564	5.54906	1.21366	1.09986	0.945297	0.279359	0.137325	-0.0811608	0.0184	0.126135	0.0756263	0.0491459
sp|P41214|EIF2D_HUMAN	EIF2D	EIF2D_HUMAN Eukaryotic translation initiation factor 2D	14	5.29955	6.12426	6.18975	6.67088	6.18871	6.34489	6.38552	7.2161	6.75288	6.25297	6.70868	6.99453	6.42298	5.11526	5.66155	5.6715	6.07111	6.53381	6.67727	5.71782	1.07621	1.09984	0.941808	0.105963	0.137297	-0.0864945	0.0937537	0.0708174	0.0463527	0.0939459
sp|Q9HA47|UCK1_HUMAN	UCK1	UCK1_HUMAN Uridine-cytidine kinase 1	7	5.44772	5.97594	5.74998	6.19298	6.76023	6.96148	6.42933	6.85337	6.58314	6.26332	6.23941	6.61353	5.94958	5.47026	6.24933	6.2604	5.84165	6.7511	6.42485	5.98239	1.15568	1.09983	1.02409	0.208746	0.137286	0.0343454	0.054587	0.0340297	0.0312761	0.0619385
sp|Q8TEA7|TBCK_HUMAN	TBCK	TBCK_HUMAN TBC domain-containing protein kinase-like protein	9	4.94511	5.91267	6.38649	6.78539	6.05403	6.4994	6.20314	6.34293	6.20284	6.25204	6.83016	7.14285	6.42332	5.50927	6.34889	6.16148	6.00741	6.27487	6.60697	6.11074	1.04452	1.0998	1.0172	0.0628424	0.137245	0.0246028	0.131999	0.0303718	0.0691545	0.0680503
sp|Q9NYV6|RRN3_HUMAN	RRN3	RRN3_HUMAN RNA polymerase I-specific transcription initiation factor RRN3	8	5.4577	5.80358	6.24907	6.70348	6.48982	6.332	6.6579	6.87439	6.8769	6.65104	6.66056	6.44174	5.92052	5.35616	5.97649	5.54866	6.05346	6.58853	6.65756	5.70046	1.08839	1.09979	0.941686	0.122197	0.137234	-0.0866817	0.0893763	0.0352789	0.0266926	0.0522562
sp|O15056|SYNJ2_HUMAN	SYNJ2	SYNJ2_HUMAN Synaptojanin-2	10	5.56683	6.06396	6.21797	6.17415	6.15537	6.24024	6.4749	6.60717	6.44349	6.45956	6.8317	6.68494	6.26283	5.85807	5.95552	6.00333	6.00573	6.36942	6.60492	6.01994	1.06056	1.09977	1.00237	0.084823	0.137203	0.00340949	0.0499	0.0327018	0.0283277	0.0287116
sp|Q9P2P6|STAR9_HUMAN	STARD9	STAR9_HUMAN StAR-related lipid transfer protein 9	4	5.69556	5.99523	5.85433	6.57031	6.8906	6.28991	6.66792	7.03076	6.68099	6.60654	6.46786	6.76258	5.8623	5.31817	5.81523	5.49171	6.02886	6.7198	6.62949	5.62185	1.11461	1.09963	0.932491	0.156533	0.137014	-0.100839	0.0632226	0.048096	0.0188835	0.0464268
sp|P11831|SRF_HUMAN	SRF	SRF_HUMAN Serum response factor	1	5.61459	5.28703	5.70241	5.87733	6.5041	8.86955	6.33984	5.80445	4.68154	7.16389	6.65506	6.21764	6.5505	5.86876	7.48176	5.38155	5.62034	6.87948	6.17953	6.32064	1.22403	1.09949	1.1246	0.291643	0.13684	0.169414	0.0440532	0.197678	0.173299	0.144054
sp|Q13616|CUL1_HUMAN	CUL1	CUL1_HUMAN Cullin-1	62	5.34962	5.99473	5.92074	6.20348	6.30884	6.38034	6.64891	6.85505	6.23413	6.17314	6.68826	6.70743	6.00688	5.50145	6.6697	6.3573	5.86714	6.54828	6.45074	6.13383	1.11609	1.09947	1.04545	0.158459	0.136807	0.0641307	0.0622442	0.0384083	0.0444172	0.0816843
sp|P27708|PYR1_HUMAN	CAD	PYR1_HUMAN CAD protein	105	5.45457	6.21806	5.97235	6.35385	6.49961	6.74775	6.67835	6.81126	6.62479	6.45525	6.62475	6.68044	5.9038	5.25253	5.97598	5.74666	5.99971	6.68424	6.59631	5.71974	1.11409	1.09944	0.953337	0.155872	0.136766	-0.068942	0.0660432	0.0201256	0.0148009	0.0569704
sp|Q13888|TF2H2_HUMAN	GTF2H2	TF2H2_HUMAN General transcription factor IIH subunit 2	12	5.35519	6.36185	5.94945	6.495	6.33399	6.34452	6.37091	6.67993	6.60916	6.35509	6.72154	6.87761	6.15539	5.35368	6.17252	5.86416	6.04037	6.43234	6.64085	5.88644	1.06489	1.09941	0.974516	0.0907056	0.13673	-0.0372427	0.0848354	0.0257745	0.0331316	0.0649493
sp|P33993|MCM7_HUMAN	MCM7	MCM7_HUMAN DNA replication licensing factor MCM7	37	5.61401	6.21324	5.88975	6.50258	6.48771	6.72469	6.59657	6.9243	6.97142	6.38526	6.5739	6.69574	5.92133	5.31621	5.65675	5.52654	6.0549	6.68332	6.65658	5.60521	1.10379	1.09937	0.925732	0.142462	0.136679	-0.111334	0.0637614	0.0280686	0.0369111	0.0451685
sp|Q9C0E2|XPO4_HUMAN	XPO4	XPO4_HUMAN Exportin-4	20	5.59306	6.01203	6.0206	6.87689	6.32312	6.65108	6.5809	6.68167	6.5406	6.67008	6.73185	6.99474	5.66523	5.2102	5.8426	5.60534	6.12564	6.55919	6.73432	5.58084	1.07078	1.09936	0.911062	0.0986565	0.13667	-0.134379	0.0880107	0.024841	0.0283668	0.047814
sp|Q8N138|ORML3_HUMAN	ORMDL3	ORML3_HUMAN ORM1-like protein 3	3	6.56526	6.77086	5.48208	6.32148	6.10268	5.55976	7.01015	6.4057	8.78365	6.09816	6.15524	6.59747	6.54236	5.23871	5.33771	5.02874	6.28492	6.26957	6.90863	5.53688	0.997558	1.09924	0.880979	-0.00352731	0.136505	-0.182821	0.0900357	0.0965241	0.183795	0.12328
sp|O95870|ABHGA_HUMAN	ABHD16A	ABHGA_HUMAN Abhydrolase domain-containing protein 16A	5	5.47216	5.71362	6.14893	6.83306	6.30137	6.86736	6.66528	6.76699	6.47303	6.60194	6.72427	6.76649	5.70911	5.44485	5.74344	5.76811	6.04194	6.65025	6.64143	5.66638	1.10068	1.09922	0.93784	0.138396	0.136482	-0.0925857	0.098834	0.0371091	0.0199034	0.0264108
sp|Q86SK9|SCD5_HUMAN	SCD5	SCD5_HUMAN Stearoyl-CoA desaturase 5	2	5.21566	5.62407	6.38825	7.18012	5.9622	6.744	6.47426	7.01702	6.62815	6.78811	6.79699	6.61609	5.39328	5.46497	5.772	5.93482	6.10202	6.54937	6.70733	5.64127	1.07331	1.0992	0.924491	0.102068	0.136452	-0.113269	0.142186	0.0686799	0.0146985	0.0452915
sp|P29317|EPHA2_HUMAN	EPHA2	EPHA2_HUMAN Ephrin type-A receptor 2	26	5.45309	5.98968	5.99934	6.54318	6.58358	6.70206	6.54455	6.91415	6.45571	6.52501	6.54344	6.84033	5.69653	5.52846	5.90664	5.77424	5.99632	6.68609	6.59112	5.72647	1.11503	1.09919	0.954997	0.157084	0.136446	-0.0664325	0.0742205	0.0248487	0.0258495	0.027583
sp|O00267|SPT5H_HUMAN	SUPT5H	SPT5H_HUMAN Transcription elongation factor SPT5	54	5.40597	5.96452	6.10408	6.35126	6.22901	6.40288	6.54079	6.7148	6.47445	6.33996	6.68211	6.69226	6.01243	5.53169	6.44109	6.11269	5.95646	6.47187	6.54719	6.02447	1.08653	1.09918	1.01142	0.119728	0.136422	0.016381	0.0672074	0.0318547	0.0260825	0.0624271
sp|Q8IXW5|RPAP2_HUMAN	RPAP2	RPAP2_HUMAN Putative RNA polymerase II subunit B1 CTD phosphatase RPAP2	9	5.8138	5.73351	5.77311	6.38067	6.49257	6.59836	6.52107	6.52946	6.63417	6.28085	6.71693	6.41879	6.24512	5.85033	6.02619	5.98508	5.92527	6.53537	6.51269	6.02668	1.10296	1.09914	1.01711	0.141386	0.136371	0.024482	0.0515357	0.00686518	0.030586	0.0271884
sp|P19623|SPEE_HUMAN	SRM	SPEE_HUMAN Spermidine synthase	23	5.20018	5.79592	6.17756	6.51637	6.40813	6.34578	6.88281	7.0023	6.39608	6.14137	6.89937	6.601	6.00127	5.33898	6.37842	5.91449	5.92251	6.65976	6.50945	5.90829	1.12448	1.0991	0.997599	0.169261	0.136329	-0.00346748	0.0952907	0.0497244	0.0492835	0.0727213
sp|Q9HA72|CAHM2_HUMAN	CALHM2	CAHM2_HUMAN Calcium homeostasis modulator protein 2	5	5.52567	6.29036	6.31537	5.31831	6.34496	6.94128	6.5127	5.96422	6.2981	7.08517	6.43875	5.95063	6.05328	5.9965	7.16212	5.80258	5.86243	6.44079	6.44316	6.25362	1.09866	1.09906	1.06673	0.135739	0.136271	0.0931934	0.0879622	0.0628734	0.0736643	0.0983596
sp|Q13425|SNTB2_HUMAN	SNTB2	SNTB2_HUMAN Beta-2-syntrophin	15	5.46127	5.94773	6.32822	6.3404	6.30253	6.56565	6.64063	6.85498	6.55039	6.41911	6.8303	6.66188	5.97849	5.46894	5.90811	5.74134	6.0194	6.59095	6.61542	5.77422	1.09495	1.09902	0.959268	0.130865	0.136212	-0.0599948	0.0688356	0.0345989	0.0263413	0.039229
sp|Q9H8H0|NOL11_HUMAN	NOL11	NOL11_HUMAN Nucleolar protein 11	14	5.45533	6.00392	6.10021	6.49825	6.32387	6.55671	6.6858	6.63936	6.60639	6.76445	6.5278	6.54109	5.64531	5.65997	5.77263	6.2189	6.01443	6.55144	6.60993	5.8242	1.08929	1.09901	0.968372	0.123384	0.136208	-0.0463669	0.0714589	0.0245487	0.0164278	0.0462225
sp|Q13188|STK3_HUMAN	STK3	STK3_HUMAN Serine/threonine-protein kinase 3	13	5.31872	6.0406	6.09827	6.49394	6.43483	6.65237	6.91713	6.78484	6.50079	6.41757	6.82732	6.5771	5.76128	5.48958	5.91049	5.77519	5.98788	6.69729	6.5807	5.73414	1.11847	1.099	0.957623	0.161532	0.136194	-0.06247	0.0817488	0.0307091	0.0268746	0.0307598
sp|Q7Z2Z2|ETUD1_HUMAN	EFTUD1	ETUD1_HUMAN Elongation factor Tu GTP-binding domain-containing protein 1	25	5.46117	5.97675	6.18212	6.22919	6.31329	6.42915	6.75678	6.64489	6.53131	6.36311	6.71277	6.60205	6.19753	5.2959	6.25642	6.0476	5.96231	6.53603	6.55231	5.94936	1.09622	1.09896	0.997829	0.132543	0.136133	-0.0031357	0.0589723	0.0308052	0.0223711	0.0747009
sp|Q96GJ1|TRM2_HUMAN	TRMT2B	TRM2_HUMAN tRNA (uracil(54)-C(5))-methyltransferase homolog	2	5.63258	6.38711	5.94683	6.24663	6.02051	6.35145	6.68812	6.15669	7.0197	6.40497	6.41918	6.76475	6.33099	5.86255	6.31663	5.45132	6.05329	6.30419	6.65215	5.99037	1.04145	1.09893	0.989606	0.0585927	0.136102	-0.0150732	0.0553806	0.0459616	0.044522	0.0701245
sp|Q8TF42|UBS3B_HUMAN	UBASH3B	UBS3B_HUMAN Ubiquitin-associated and SH3 domain-containing protein B	9	5.35282	6.07742	5.73263	6.2511	6.55403	7.06635	6.43759	6.70037	6.17478	6.54416	6.70987	6.30095	6.20707	5.40451	6.59637	5.88998	5.85349	6.68959	6.43244	6.02448	1.14284	1.09891	1.02921	0.192619	0.136068	0.0415397	0.0678722	0.0408423	0.0373462	0.0837027
sp|Q9Y5R4|HEMK1_HUMAN	HEMK1	HEMK1_HUMAN HemK methyltransferase family member 1	1	5.80382	5.9365	6.62871	5.80248	5.68753	7.03268	7.15482	5.54596	6.84825	6.97431	6.17115	6.56767	4.62239	6.6625	5.60535	6.95587	6.04288	6.35525	6.64034	5.96153	1.05169	1.09887	0.986538	0.0727126	0.136023	-0.0195537	0.0654625	0.134717	0.0536099	0.178581
sp|P57775|FBXW4_HUMAN	FBXW4	FBXW4_HUMAN F-box/WD repeat-containing protein 4	1	5.15205	6.69783	6.02155	5.7672	6.83793	7.04006	6.7341	5.58504	7.08133	6.40738	6.62964	5.85705	6.29224	5.75975	5.83521	6.30163	5.90966	6.54928	6.49385	6.04721	1.10823	1.09885	1.02328	0.148262	0.136	0.0331946	0.108262	0.100051	0.0783476	0.0479604
sp|Q7Z5L2|R3HCL_HUMAN	R3HCC1L	R3HCL_HUMAN Coiled-coil domain-containing protein R3HCC1L	1	6.3758	6.2201	5.64178	4.19554	6.99905	6.68459	6.13743	6.2519	7.26759	6.25729	4.84842	6.27714	5.82985	6.75511	7.08787	7.17054	5.60831	6.51824	6.16261	6.71084	1.16225	1.09884	1.19659	0.216918	0.135977	0.258929	0.177125	0.0610332	0.16146	0.0915176
sp|Q00535|CDK5_HUMAN	CDK5	CDK5_HUMAN Cyclin-dependent kinase 5	11	5.54823	5.67527	6.44291	6.4153	6.33022	6.78927	6.89624	7.02064	6.53197	6.47005	6.60151	6.85364	5.94572	5.2332	5.52555	5.72026	6.02043	6.75909	6.61429	5.60618	1.12269	1.09864	0.931193	0.166964	0.135721	-0.102847	0.0788774	0.0445536	0.0254537	0.0538991
sp|Q8WTW3|COG1_HUMAN	COG1	COG1_HUMAN Conserved oligomeric Golgi complex subunit 1	15	5.3744	6.30091	6.14888	6.65956	6.31971	6.56115	6.36996	6.87848	6.84863	6.38873	6.83098	6.82963	5.72111	5.44405	5.74743	5.57639	6.12094	6.53232	6.72449	5.62225	1.06721	1.0986	0.918527	0.0938439	0.135673	-0.122606	0.0885139	0.0387501	0.0333124	0.0250071
sp|Q9P2R3-4|ANFY1_HUMAN	ANKFY1	ANFY1_HUMAN Isoform 4 of Ankyrin repeat and FYVE domain-containing protein 1	15	5.70444	6.31301	5.89639	6.28071	6.47303	6.57149	6.60799	6.59394	6.62872	6.57179	6.51728	6.86227	5.83607	5.48717	5.96429	5.69142	6.04864	6.56161	6.64501	5.74474	1.08481	1.0986	0.949757	0.11744	0.135662	-0.0743692	0.0491738	0.00928707	0.0228465	0.0356358
sp|Q9NTJ5|SAC1_HUMAN	SACM1L	SAC1_HUMAN Phosphatidylinositide phosphatase SAC1	25	5.4329	5.94429	6.13527	6.26655	6.45785	6.76678	6.69761	6.98622	6.50979	6.40511	6.60066	6.60723	5.94243	5.55342	5.95988	5.73402	5.94475	6.72711	6.5307	5.79744	1.13161	1.09857	0.975219	0.178371	0.13562	-0.0362014	0.061565	0.0323505	0.0145161	0.0331756
sp|Q13492|PICAL_HUMAN	PICALM	PICAL_HUMAN Phosphatidylinositol-binding clathrin assembly protein	7	5.45669	6.07353	6.13152	6.61864	5.97984	6.32998	6.70802	6.90877	6.38452	6.33439	6.9412	7.01312	5.82702	5.18299	6.2238	5.88597	6.0701	6.48165	6.66831	5.77995	1.0678	1.09855	0.9522	0.0946426	0.135602	-0.0706633	0.0784878	0.0635178	0.0537503	0.0752035
sp|Q8IYT2|CMTR2_HUMAN	CMTR2	CMTR2_HUMAN Cap-specific mRNA (nucleoside-2'-O-)-methyltransferase 2	2	5.43942	6.53092	6.24407	6.04927	6.43698	5.60102	6.37156	6.77252	6.77433	5.86253	7.21881	6.79892	6.34348	5.48421	5.81331	6.25864	6.06592	6.29552	6.66365	5.97491	1.03785	1.09854	0.984997	0.0535991	0.135586	-0.0218095	0.0761876	0.0786582	0.0857948	0.0671727
sp|P35249|RFC4_HUMAN	RFC4	RFC4_HUMAN Replication factor C subunit 4	23	5.49388	6.24587	5.8006	6.23963	6.34645	6.72635	6.54178	6.65293	6.65965	6.40632	6.51499	6.54164	6.0759	5.61506	6.21458	5.92437	5.945	6.56688	6.53065	5.95748	1.10461	1.09851	1.0021	0.143532	0.135551	0.003026	0.0615508	0.0251844	0.0159291	0.0431744
sp|O43164|PJA2_HUMAN	PJA2	PJA2_HUMAN E3 ubiquitin-protein ligase Praja-2	4	5.64948	6.32907	5.74648	6.76181	5.80359	6.14289	5.44599	5.84777	6.83211	6.71103	6.65913	6.69554	6.69682	5.92988	5.62536	7.12304	6.12171	5.81006	6.72445	6.34377	0.949091	1.09846	1.03627	-0.0753816	0.135482	0.0514069	0.0852219	0.0491646	0.0111528	0.108426
sp|Q9UK73|FEM1B_HUMAN	FEM1B	FEM1B_HUMAN Protein fem-1 homolog B	3	5.60881	6.00528	5.99672	5.98324	6.02588	6.58228	6.41201	6.55707	6.2692	6.52499	6.76174	6.35959	6.38293	6.46259	6.38468	5.68299	5.89851	6.39431	6.47888	6.2283	1.08405	1.09839	1.05591	0.116438	0.135393	0.0784867	0.0327791	0.0401646	0.0333824	0.0586727
sp|Q8NFH5|NUP53_HUMAN	NUP35	NUP53_HUMAN Nucleoporin NUP53	8	5.49253	6.0287	6.29039	6.16081	6.0506	6.34907	6.5288	6.50516	6.4466	6.36895	6.76068	6.75336	6.24575	5.54952	6.01427	6.45481	5.99311	6.35841	6.5824	6.06609	1.06095	1.09833	1.01218	0.0853612	0.135309	0.0174621	0.0584676	0.034624	0.0310123	0.0640526
sp|Q92616|GCN1L_HUMAN	GCN1L1	GCN1L_HUMAN Translational activator GCN1	133	5.56209	6.23558	6.03846	6.44022	6.51865	6.80851	6.7924	7.07143	6.69142	6.60604	6.6201	6.74445	5.63532	5.11237	5.66229	5.4607	6.06909	6.79775	6.6655	5.46767	1.12006	1.09827	0.900905	0.163577	0.135234	-0.150553	0.0619033	0.0332153	0.00968477	0.0463013
sp|Q8NFF5|FAD1_HUMAN	FLAD1	FAD1_HUMAN FAD synthase	15	5.7994	6.02971	5.79171	6.49393	6.04588	6.24551	6.56886	6.73673	6.56513	6.34106	6.68627	6.89	5.83441	5.41097	6.54549	6.01496	6.02869	6.39925	6.62061	5.95146	1.06147	1.09819	0.98719	0.0860578	0.135121	-0.0186009	0.054611	0.0486835	0.0346752	0.0789743
sp|Q96EK5|KBP_HUMAN	KIAA1279	KBP_HUMAN KIF1-binding protein	25	5.26638	6.109	6.08854	6.90812	6.24296	6.08871	6.47319	7.20204	6.792	6.2154	6.83581	6.92154	5.81489	5.15021	6.07123	5.81997	6.09301	6.50172	6.69119	5.71407	1.06708	1.09817	0.937808	0.0936674	0.135107	-0.0926351	0.110015	0.0758078	0.0480814	0.0690393
sp|Q4KWH8|PLCH1_HUMAN	PLCH1	PLCH1_HUMAN 1-phosphatidylinositol 4,5-bisphosphate phosphodiesterase eta-1	7	5.76756	6.2385	6.17787	6.04772	6.2101	6.59444	7.09263	7.2804	6.91041	6.9139	6.57604	6.21001	5.50217	5.58244	5.54442	5.35139	6.05791	6.79439	6.65259	5.49511	1.12157	1.09817	0.907095	0.165524	0.135095	-0.140674	0.0345486	0.0714255	0.0503426	0.0184281
sp|P43357|MAGA3_HUMAN	MAGEA3	MAGA3_HUMAN Melanoma-associated antigen 3	3	5.60838	6.12564	5.87259	6.11646	6.56756	6.27389	6.81052	6.68865	6.58246	6.26467	6.63094	6.5726	6.07209	5.48181	6.6563	5.67543	5.93077	6.58515	6.51267	5.97141	1.11034	1.09812	1.00685	0.150999	0.13503	0.00985221	0.0412756	0.0349266	0.0256863	0.0868303
sp|Q9Y289|SC5A6_HUMAN	SLC5A6	SC5A6_HUMAN Sodium-dependent multivitamin transporter	6	5.44609	5.74603	6.13882	6.42857	6.26027	6.39357	6.94681	6.28095	6.6498	6.41421	6.48409	6.54181	5.86338	6.03404	6.22339	6.14817	5.93988	6.4704	6.52248	6.06724	1.08932	1.09808	1.02144	0.123422	0.134987	0.0306084	0.0727242	0.0499139	0.0152753	0.0258148
sp|O14896|IRF6_HUMAN	IRF6	IRF6_HUMAN Interferon regulatory factor 6	9	5.43574	5.94041	5.97914	6.43998	6.34998	6.27586	6.74985	6.77789	6.26407	6.29229	6.9351	6.63596	6.0723	5.52753	6.33601	5.9879	5.94882	6.53839	6.53186	5.98093	1.09911	1.09801	1.0054	0.136334	0.13489	0.00776812	0.0690018	0.0401258	0.048618	0.0562914
sp|O95834-3|EMAL2_HUMAN	EML2	EMAL2_HUMAN Isoform 3 of Echinoderm microtubule-associated protein-like 2	22	5.60781	5.83568	6.03767	6.44535	6.0082	6.15054	6.55467	6.91136	6.34491	6.29315	6.91082	6.72081	6.07121	5.38545	6.51922	6.20314	5.98163	6.40619	6.56742	6.04476	1.07098	1.09793	1.01055	0.0989291	0.134789	0.0151458	0.0594382	0.0637906	0.0453563	0.0790845
sp|Q92925|SMRD2_HUMAN	SMARCD2	SMRD2_HUMAN SWI/SNF-related matrix-associated actin-dependent regulator of chromatin subfamily D member 2	28	5.4669	5.8802	6.03379	6.46353	6.40222	6.5506	6.65655	6.89863	6.58537	6.3127	6.7597	6.52045	5.97839	5.3628	6.20443	5.92374	5.9611	6.627	6.54455	5.86734	1.11171	1.09788	0.984271	0.152776	0.134715	-0.0228732	0.0690649	0.0315348	0.0282149	0.0609531
sp|Q969Y2-2|GTPB3_HUMAN	GTPBP3	GTPB3_HUMAN Isoform 2 of tRNA modification GTPase GTPBP3, mitochondrial	11	5.52508	6.37045	6.03943	6.23762	6.40917	6.60239	6.5098	6.44413	6.34429	6.57047	6.87785	6.74571	6.07962	5.43624	6.22584	5.58191	6.04314	6.49137	6.63458	5.8309	1.07417	1.09787	0.964879	0.103224	0.134706	-0.0515804	0.0614239	0.0130878	0.0347986	0.0653497
sp|Q16512-2|PKN1_HUMAN	PKN1	PKN1_HUMAN Isoform 2 of Serine/threonine-protein kinase N1	29	5.50384	5.79025	6.10733	6.44742	6.29768	6.18408	6.6629	6.84674	6.61402	6.27566	6.71618	6.57549	6.00622	5.32059	6.57241	6.0792	5.96221	6.49785	6.54534	5.9946	1.08984	1.0978	1.00543	0.124115	0.13462	0.0078175	0.0682093	0.0476406	0.0289262	0.0858982
sp|O75394|RM33_HUMAN	MRPL33	RM33_HUMAN 39S ribosomal protein L33, mitochondrial	4	4.66913	4.94348	6.97171	6.33735	6.27229	6.17713	6.08628	6.47521	6.26758	6.56317	6.01011	6.32206	6.44468	7.33869	6.38512	6.736	5.73042	6.25273	6.29073	6.72612	1.09115	1.09778	1.17376	0.125845	0.134587	0.231135	0.192612	0.0266498	0.0360734	0.0648526
sp|Q8TB03|CX038_HUMAN	CXorf38	CX038_HUMAN Uncharacterized protein CXorf38	13	5.57022	5.97685	6.06185	6.3929	6.0312	6.23025	6.66796	6.95826	6.4156	6.28915	6.78878	6.85434	6.02334	5.47046	6.26843	6.00044	6.00045	6.47192	6.58697	5.94067	1.07857	1.09774	0.990036	0.109121	0.134543	-0.0144469	0.0563874	0.0647974	0.0420611	0.0565796
sp|Q9BU23|LMF2_HUMAN	LMF2	LMF2_HUMAN Lipase maturation factor 2	4	5.77765	6.66318	5.93817	6.59357	6.58595	5.91618	6.48642	6.37985	6.58796	6.72064	7.01087	7.0932	5.5296	5.16408	5.77875	5.77393	6.24314	6.3421	6.85317	5.56159	1.01585	1.09771	0.890832	0.0226882	0.134499	-0.166775	0.0721634	0.0466967	0.0347746	0.0520383
sp|P08243|ASNS_HUMAN	ASNS	ASNS_HUMAN Asparagine synthetase [glutamine-hydrolyzing]	70	5.45876	6.26075	5.9904	6.43803	6.63304	6.83637	6.66438	7.09929	6.72326	6.43312	6.69274	6.65597	5.71523	5.2579	5.62141	5.51936	6.03699	6.80827	6.62627	5.52848	1.12776	1.09761	0.915768	0.17346	0.134369	-0.126947	0.0707588	0.0313756	0.0198715	0.035692
sp|O95905-3|SGT1_HUMAN	ECD	SGT1_HUMAN Isoform 3 of Protein SGT1	8	5.5295	6.20488	6.10655	6.72463	6.27099	6.33487	6.34233	6.83711	6.60216	6.46541	6.91839	6.9773	5.96463	5.44522	5.67768	5.59834	6.14139	6.44632	6.74081	5.67147	1.04965	1.0976	0.923483	0.0699117	0.134358	-0.114843	0.0797601	0.0407183	0.0365928	0.0384308
sp|Q5T7W0|ZN618_HUMAN	ZNF618	ZN618_HUMAN Zinc finger protein 618	3	5.91731	6.14482	6.51241	5.5435	6.26393	6.58504	6.54165	6.03547	7.17907	6.55284	7.06633	5.67296	5.59195	6.18287	6.46219	5.74765	6.02951	6.35652	6.6178	5.99616	1.05424	1.09757	0.99447	0.076197	0.134311	-0.00800068	0.0673883	0.0404303	0.10371	0.0665136
sp|Q9HCJ3-2|RAVR2_HUMAN	RAVER2	RAVR2_HUMAN Isoform 2 of Ribonucleoprotein PTB-binding 2	8	5.40302	6.02022	6.05842	6.31082	6.28038	6.46044	6.56066	6.51884	6.50451	6.4626	6.52594	6.62072	5.8599	5.96333	6.10185	6.34836	5.94812	6.45508	6.52844	6.06836	1.08523	1.09756	1.02021	0.118001	0.134305	0.0288729	0.0648263	0.0191332	0.0102484	0.0348284
sp|Q6P9B6|TLDC1_HUMAN	TLDC1	TLDC1_HUMAN TLD domain-containing protein 1	5	5.06539	5.94763	6.30154	6.39762	6.21522	6.58627	6.91213	6.93003	6.54976	6.37146	6.64114	6.463	5.84984	5.39062	6.3617	6.01663	5.92805	6.66091	6.50634	5.9047	1.12363	1.09755	0.996062	0.168163	0.13429	-0.00569325	0.102358	0.0505224	0.0177755	0.0683514
sp|Q8WWC4|CB047_HUMAN	C2orf47	CB047_HUMAN Uncharacterized protein C2orf47, mitochondrial	6	5.49037	6.45293	6.10816	6.21782	6.59521	6.66511	6.53658	6.66178	6.44863	6.18955	6.8592	7.13869	5.69244	5.08186	6.05434	5.80735	6.06732	6.61467	6.65902	5.659	1.09021	1.09752	0.932701	0.12461	0.13425	-0.100513	0.0676812	0.00925379	0.0634065	0.0730384
sp|Q01167|FOXK2_HUMAN	FOXK2	FOXK2_HUMAN Forkhead box protein K2	12	5.53265	6.19902	6.31389	6.08319	6.19526	6.59493	6.81515	6.56081	6.43711	6.7549	6.74649	6.54292	5.86753	5.49778	6.18009	5.67828	6.03219	6.54154	6.62035	5.80592	1.08444	1.0975	0.96249	0.116948	0.134227	-0.0551566	0.0573734	0.0392722	0.023657	0.0502196
sp|Q96CB8|INT12_HUMAN	INTS12	INT12_HUMAN Integrator complex subunit 12	1	5.99955	5.97856	5.80151	5.93609	6.80047	6.52209	6.5088	5.93223	6.74884	6.22642	6.55016	6.50193	6.03476	5.94128	6.08675	6.43057	5.92893	6.4409	6.50684	6.12334	1.08635	1.09747	1.03279	0.119491	0.134185	0.0465476	0.0150031	0.0566381	0.0330928	0.0348634
sp|Q14139-2|UBE4A_HUMAN	UBE4A	UBE4A_HUMAN Isoform 2 of Ubiquitin conjugation factor E4 A	18	5.50679	6.06429	5.91411	6.73912	6.59923	6.8144	6.58969	6.77887	6.48632	6.39077	6.66764	7.0382	5.7877	5.04107	6.07055	5.51127	6.05608	6.69555	6.64573	5.60265	1.10559	1.09737	0.925128	0.144818	0.134045	-0.112275	0.0846535	0.0175771	0.0429949	0.0782699
sp|P24928|RPB1_HUMAN	POLR2A	RPB1_HUMAN DNA-directed RNA polymerase II subunit RPB1	45	5.48838	6.31714	6.16416	6.35123	6.3521	6.85876	6.63163	6.78841	6.68309	6.60498	6.72349	6.67652	5.69924	5.25389	5.73554	5.67145	6.08023	6.65773	6.67202	5.59003	1.09498	1.09733	0.919378	0.130904	0.133998	-0.121269	0.066258	0.0337626	0.00738646	0.040362
sp|Q9UGK8|SRGEF_HUMAN	SERGEF	SRGEF_HUMAN Secretion-regulating guanine nucleotide exchange factor	2	5.41469	5.27688	5.97869	6.80703	5.93048	6.10225	7.14475	7.69526	6.34246	5.81886	6.87622	6.72254	4.89226	5.49302	7.76071	5.74389	5.86932	6.71819	6.44002	5.97247	1.14463	1.09723	1.01757	0.194878	0.133871	0.0251337	0.118407	0.125614	0.0731322	0.208383
sp|P52789|HXK2_HUMAN	HK2	HXK2_HUMAN Hexokinase-2	28	5.60281	6.22433	5.95492	6.56143	6.34602	6.60604	6.56817	6.84708	6.6648	6.38541	6.8011	6.85893	5.81783	5.26841	5.85287	5.63986	6.08587	6.59183	6.67756	5.64474	1.08314	1.09722	0.927516	0.115214	0.133857	-0.108556	0.0668005	0.0311314	0.0316112	0.0474177
sp|Q96IJ6-2|GMPPA_HUMAN	GMPPA	GMPPA_HUMAN Isoform 2 of Mannose-1-phosphate guanyltransferase alpha	12	5.72966	6.28321	6.01011	6.13353	6.55447	6.70773	6.66139	6.80584	6.60495	6.47201	6.64107	6.78705	5.65506	5.15529	5.75171	6.04694	6.03913	6.68236	6.62627	5.65225	1.10651	1.09722	0.935938	0.146017	0.133857	-0.0955149	0.0388453	0.0156205	0.0195452	0.0656158
sp|Q8N442|GUF1_HUMAN	GUF1	GUF1_HUMAN Translation factor GUF1, mitochondrial	6	5.84514	6.24387	5.96128	6.74118	6.55458	6.48286	6.67262	6.46065	6.89887	6.62095	6.72232	6.95925	5.57587	5.47802	5.3237	5.45884	6.19787	6.54268	6.80035	5.45911	1.05563	1.09721	0.880804	0.0781092	0.133837	-0.183107	0.0643832	0.0145892	0.0229746	0.019015
sp|Q658P3-2|STEA3_HUMAN	STEAP3	STEA3_HUMAN Isoform 2 of Metalloreductase STEAP3	4	5.7642	5.93026	6.36989	6.4617	6.32564	6.54504	6.81439	6.51676	7.08181	6.77487	6.74784	6.30561	5.50049	5.34452	5.80182	5.71518	6.13151	6.55046	6.72753	5.5905	1.06833	1.09721	0.911766	0.0953527	0.133834	-0.133265	0.0550073	0.0307058	0.047487	0.0370648
sp|Q5W0U4|BSPRY_HUMAN	BSPRY	BSPRY_HUMAN B box and SPRY domain-containing protein	4	5.18302	5.58442	6.12763	6.15831	6.03929	6.36411	6.8122	6.24794	6.02763	6.3322	6.33821	6.59554	6.61211	6.20029	6.69303	6.68405	5.76335	6.36589	6.32339	6.54737	1.10455	1.09717	1.13604	0.143455	0.133793	0.184009	0.0812288	0.0512865	0.0367306	0.0357706
sp|P17152|TMM11_HUMAN	TMEM11	TMM11_HUMAN Transmembrane protein 11, mitochondrial	2	5.45026	6.16929	6.28774	6.53541	5.89782	7.03227	6.83049	6.68034	6.54719	6.71226	6.88824	6.66984	6.14836	5.13284	5.49541	5.52225	6.11067	6.61023	6.70438	5.57471	1.08175	1.09716	0.912291	0.113369	0.133773	-0.132434	0.0762522	0.0750874	0.0210531	0.075636
sp|Q9HD23|MRS2_HUMAN	MRS2	MRS2_HUMAN Magnesium transporter MRS2 homolog, mitochondrial	5	5.83491	5.66021	6.47064	6.58092	6.15592	6.50816	6.77946	6.78579	6.66986	6.47364	6.88237	6.90426	5.93489	4.91343	6.0034	5.44217	6.13667	6.55733	6.73253	5.57347	1.06855	1.0971	0.908224	0.095653	0.133693	-0.13888	0.0744953	0.0453318	0.0300627	0.0908019
sp|Q8NEM2|SHCBP_HUMAN	SHCBP1	SHCBP_HUMAN SHC SH2 domain-binding protein 1	17	5.61781	6.32336	5.91901	6.35023	6.51066	6.41843	6.39399	6.6007	6.71792	6.76204	6.62407	6.45665	6.12029	5.73098	5.72913	5.72474	6.0526	6.48094	6.64017	5.82628	1.07077	1.09708	0.962608	0.0986486	0.133665	-0.0549793	0.0579272	0.0145547	0.0203607	0.0336442
sp|P51959|CCNG1_HUMAN	CCNG1	CCNG1_HUMAN Cyclin-G1	1	5.5345	6.05326	6.2941	6.32616	6.24995	7.46693	6.64597	6.01755	7.25987	6.12493	6.05591	7.1165	5.92646	5.31823	5.70978	5.8999	6.052	6.5951	6.6393	5.71359	1.08974	1.09704	0.944083	0.123981	0.133619	-0.083015	0.0604544	0.0965099	0.0959612	0.0491255
sp|Q7L1V2|MON1B_HUMAN	MON1B	MON1B_HUMAN Vacuolar fusion protein MON1 homolog B	8	5.51942	5.57217	6.36694	6.28202	6.00848	6.23777	6.33801	6.4924	6.47264	6.39412	6.58756	6.58879	5.95529	5.78197	6.86435	6.53806	5.93514	6.26917	6.51078	6.28492	1.05628	1.09699	1.05893	0.0789918	0.133548	0.0826124	0.0760593	0.0323661	0.0145831	0.0801597
sp|Q99943|PLCA_HUMAN	AGPAT1	PLCA_HUMAN 1-acyl-sn-glycerol-3-phosphate acyltransferase alpha	4	5.61514	6.20792	6.16461	6.45412	6.00659	6.47142	6.75752	6.68516	6.65341	6.44308	6.70705	7.00764	5.5794	5.66434	5.81877	5.76381	6.11045	6.48017	6.7028	5.70658	1.06051	1.09694	0.933905	0.0847542	0.133485	-0.0986517	0.0579279	0.0522022	0.0347587	0.0186061
sp|Q9UDY8|MALT1_HUMAN	MALT1	MALT1_HUMAN Mucosa-associated lymphoid tissue lymphoma translocation protein 1	21	5.46804	6.03283	6.05946	6.35958	6.30743	6.73983	6.79624	6.64197	6.4633	6.49149	6.72982	6.55354	5.83676	5.44409	6.04726	6.02835	5.97998	6.62137	6.55954	5.83912	1.10726	1.09692	0.976444	0.146989	0.133454	-0.0343903	0.0622178	0.0330416	0.0182355	0.0479509
sp|Q8WU76|SCFD2_HUMAN	SCFD2	SCFD2_HUMAN Sec1 family domain-containing protein 2	6	5.39469	6.14252	6.07393	6.58133	6.09009	6.6486	6.21477	6.85701	6.24411	6.58568	6.72796	6.97926	5.76686	5.39314	5.99552	6.30453	6.04812	6.45262	6.63425	5.86501	1.06688	1.09691	0.969725	0.0933983	0.133448	-0.044352	0.0810485	0.055873	0.0462451	0.0654832
tr|F8VV04|F8VV04_HUMAN	SART3	F8VV04_HUMAN Squamous cell carcinoma antigen recognized by T-cells 3 (Fragment)	2	5.54282	5.60335	7.05867	7.09044	6.46003	6.03314	5.92283	6.80327	7.65406	6.57885	6.48809	7.02377	5.89963	5.21467	5.45589	5.1705	6.32382	6.30482	6.93619	5.43517	0.996995	1.09684	0.859476	-0.00434169	0.133348	-0.21847	0.137152	0.0642493	0.0768084	0.0614658
sp|P47897|SYQ_HUMAN	QARS	SYQ_HUMAN Glutamine--tRNA ligase	49	5.54611	6.14384	5.7881	6.31458	6.45249	6.53523	6.75276	6.89789	6.64694	6.41339	6.48359	6.55255	6.08199	5.39285	6.19348	5.8042	5.94816	6.65959	6.52412	5.86813	1.11961	1.09683	0.986546	0.162991	0.13334	-0.019542	0.0582235	0.0305065	0.0152758	0.060775
sp|Q9NUQ8|ABCF3_HUMAN	ABCF3	ABCF3_HUMAN ATP-binding cassette sub-family F member 3	17	5.69177	6.19583	6.06976	6.49889	6.38673	6.66766	6.77398	6.83632	6.62017	6.64814	6.83259	6.72193	5.79868	5.27436	5.48009	5.50309	6.11406	6.66617	6.70571	5.51405	1.0903	1.09677	0.901864	0.124727	0.133258	-0.149018	0.0546611	0.0298346	0.0141456	0.0391406
sp|Q9H9Y6|RPA2_HUMAN	POLR1B	RPA2_HUMAN DNA-directed RNA polymerase I subunit RPA2	21	5.56968	6.06873	6.17714	6.47357	6.53599	6.60167	6.48141	6.81622	6.90636	6.3548	6.81401	6.56394	5.89419	5.32724	5.66573	5.74932	6.07228	6.60882	6.65978	5.65912	1.08836	1.09675	0.93196	0.122155	0.133236	-0.101661	0.0619587	0.0222046	0.0374673	0.0425053
sp|O75113|N4BP1_HUMAN	N4BP1	N4BP1_HUMAN NEDD4-binding protein 1	14	5.61711	5.87421	5.97027	6.33796	6.1682	6.5241	6.51243	6.41959	6.31334	6.25786	6.75204	6.77858	6.11039	5.64331	6.55278	6.16783	5.94989	6.40608	6.52546	6.11858	1.07667	1.09674	1.02835	0.106579	0.133216	0.0403339	0.0501856	0.0258093	0.0426172	0.0609266
sp|Q96JB2|COG3_HUMAN	COG3	COG3_HUMAN Conserved oligomeric Golgi complex subunit 3	19	5.55536	6.36171	5.98027	6.5868	6.40532	6.85486	6.74457	6.84431	6.59558	6.62622	6.84141	6.78827	5.60054	5.21081	5.5667	5.4373	6.12104	6.71227	6.71287	5.45384	1.09659	1.09669	0.890999	0.133024	0.133154	-0.166504	0.0739492	0.031372	0.0179325	0.0323865
sp|A1L390|PKHG3_HUMAN	PLEKHG3	PKHG3_HUMAN Pleckstrin homology domain-containing family G member 3	3	5.82126	5.55732	6.04028	6.676	6.37275	6.54923	6.90971	5.97008	6.25689	6.77577	7.10624	6.28451	5.32364	6.23566	6.18845	5.9322	6.02371	6.45044	6.60585	5.91999	1.07084	1.09664	0.98278	0.0987446	0.133091	-0.0250594	0.0792841	0.0605384	0.0620659	0.0708321
sp|Q02809|PLOD1_HUMAN	PLOD1	PLOD1_HUMAN Procollagen-lysine,2-oxoglutarate 5-dioxygenase 1	32	5.39405	6.24663	5.87447	6.3928	6.41121	6.66477	6.37439	6.87354	6.52351	6.36729	6.64579	6.6817	6.06541	5.35848	6.22399	5.90195	5.97699	6.58098	6.55457	5.88746	1.10105	1.09663	0.985021	0.138883	0.133083	-0.0217738	0.0745686	0.0355403	0.0216696	0.0639263
sp|P17535|JUND_HUMAN	JUND	JUND_HUMAN Transcription factor jun-D	1	5.38764	6.39346	6.71487	5.15929	5.39662	5.94115	6.05159	6.46535	5.17375	6.50628	7.12691	7.13245	5.40391	8.69909	5.5294	6.91824	5.91381	5.96368	6.48485	6.63766	1.00843	1.09656	1.1224	0.0121131	0.132984	0.166586	0.12796	0.0738222	0.1422	0.231418
sp|O75063|XYLK_HUMAN	FAM20B	XYLK_HUMAN Glycosaminoglycan xylosylkinase	8	5.29108	6.2303	6.08523	6.18248	6.6508	6.43752	6.74958	7.00163	6.05367	6.25166	6.63007	7.15049	5.71507	5.81606	6.25729	5.49707	5.94727	6.70988	6.52147	5.82137	1.12823	1.09655	0.978831	0.174059	0.13297	-0.0308688	0.0742536	0.0348842	0.0740221	0.0549094
sp|Q96MX6|WDR92_HUMAN	WDR92	WDR92_HUMAN WD repeat-containing protein 92	9	5.06666	5.72527	6.08032	6.69023	6.12208	6.3832	6.4123	6.81815	6.45685	6.13946	6.57878	6.66166	6.30926	5.83648	6.60868	6.11062	5.89062	6.43393	6.45919	6.21626	1.09223	1.09652	1.05528	0.127281	0.132933	0.0776274	0.115205	0.0446803	0.0354765	0.0523779
sp|Q96FS4|SIPA1_HUMAN	SIPA1	SIPA1_HUMAN Signal-induced proliferation-associated protein 1	9	6.05695	6.10097	6.02525	6.3001	5.80026	6.52219	6.59467	6.18552	6.97166	6.74305	6.50337	6.62698	5.96103	5.94765	5.59577	6.06459	6.12082	6.27566	6.71127	5.89226	1.0253	1.09647	0.962659	0.0360428	0.13286	-0.0549033	0.0201752	0.0579425	0.0296937	0.0346983
sp|Q659C4|LAR1B_HUMAN	LARP1B	LAR1B_HUMAN La-related protein 1B	1	5.21241	5.02179	5.43297	7.72034	5.80552	6.90107	7.11618	6.10618	6.49969	5.23886	6.96278	6.94178	5.90561	6.15084	8.26821	4.71575	5.84688	6.48224	6.41078	6.2601	1.10867	1.09644	1.07067	0.148826	0.132833	0.0985199	0.215538	0.0966144	0.126339	0.236128
sp|P52294|IMA5_HUMAN	KPNA1	IMA5_HUMAN Importin subunit alpha-5	10	5.20293	6.08218	6.05187	6.49206	6.49053	6.88231	6.89912	7.06734	6.56619	6.48782	6.45647	6.61671	5.91894	5.0576	5.9706	5.75732	5.95726	6.83483	6.5318	5.67612	1.14731	1.09644	0.952806	0.198255	0.132831	-0.0697451	0.0908931	0.0357378	0.0111811	0.0743876
sp|P12956|XRCC6_HUMAN	XRCC6	XRCC6_HUMAN X-ray repair cross-complementing protein 6	139	5.46744	6.12294	6.09853	6.4233	6.47885	6.68953	6.73329	6.90313	6.73808	6.56742	6.72348	6.40847	5.90981	5.17872	5.9568	5.60021	6.02805	6.7012	6.60936	5.66139	1.11167	1.09643	0.939173	0.152727	0.132819	-0.0905369	0.0666652	0.0260445	0.0233918	0.0633341
sp|O75448|MED24_HUMAN	MED24	MED24_HUMAN Mediator of RNA polymerase II transcription subunit 24	16	5.59101	6.34584	5.83437	6.30434	6.69349	6.57944	6.66059	6.72773	6.80485	6.34728	6.5895	6.65427	5.86615	5.38919	5.95391	5.65805	6.01889	6.66531	6.59898	5.71683	1.1074	1.09638	0.949814	0.147175	0.132745	-0.0742833	0.0610832	0.00952282	0.0288696	0.0439407
sp|Q7Z6J6|FRMD5_HUMAN	FRMD5	FRMD5_HUMAN FERM domain-containing protein 5	4	5.43717	6.02384	6.6351	6.08119	6.2777	6.61792	7.04262	6.5405	6.55227	6.79905	6.37387	6.78182	5.56573	5.58779	5.89694	5.7865	6.04432	6.61969	6.62675	5.70924	1.09519	1.09636	0.944562	0.131181	0.132721	-0.0822825	0.0810189	0.0479378	0.0305841	0.0279783
sp|O15516|CLOCK_HUMAN	CLOCK	CLOCK_HUMAN Circadian locomoter output cycles protein kaput	2	5.48551	6.23137	5.75592	6.35439	6.56264	6.34703	7.05213	6.29254	6.55185	6.48395	6.96984	6.11749	5.89003	6.1209	5.60048	6.18394	5.9568	6.56358	6.53078	5.94884	1.10186	1.09636	0.998664	0.139947	0.132719	-0.00192915	0.0682556	0.0527071	0.0534989	0.0444423
sp|Q9NRF2|SH2B1_HUMAN	SH2B1	SH2B1_HUMAN SH2B adapter protein 1	3	5.56725	6.2441	6.10655	6.14388	6.02629	6.86978	6.81399	6.87373	6.37116	6.21847	7.02798	6.76219	5.91324	5.69351	5.72243	5.64546	6.01545	6.64595	6.59495	5.74366	1.10481	1.09634	0.954819	0.143803	0.13269	-0.0667011	0.0506012	0.0622943	0.0558711	0.0204444
sp|P53004|BIEA_HUMAN	BLVRA	BIEA_HUMAN Biliverdin reductase A	29	5.25528	5.92921	6.01637	6.32923	6.30884	6.13427	6.79352	7.1332	6.35847	6.13445	6.85348	6.4499	6.06766	5.31408	6.76534	6.1567	5.88252	6.59246	6.44907	6.07595	1.12069	1.09631	1.03288	0.164381	0.132657	0.0466739	0.076848	0.0691364	0.0465822	0.0979372
sp|Q13620|CUL4B_HUMAN	CUL4B	CUL4B_HUMAN Cullin-4B	48	5.55334	6.10871	5.9732	6.43856	6.43875	6.5742	6.7252	6.85686	6.66189	6.48058	6.67094	6.57861	5.9465	5.30027	6.0119	5.68049	6.01845	6.64875	6.598	5.73479	1.10473	1.0963	0.952868	0.143691	0.132637	-0.0696519	0.0608996	0.0272963	0.0134328	0.0563571
sp|O75534-3|CSDE1_HUMAN	CSDE1	CSDE1_HUMAN Isoform 3 of Cold shock domain-containing protein E1	68	5.42178	6.08543	5.98726	6.29247	6.38508	6.53591	6.65766	6.95152	6.51592	6.26283	6.66277	6.63528	6.05847	5.28797	6.33726	5.92239	5.94674	6.63254	6.5192	5.90152	1.11533	1.09627	0.992397	0.157464	0.132597	-0.0110106	0.0626184	0.0362012	0.0279809	0.0752332
sp|Q969Z0|TBRG4_HUMAN	TBRG4	TBRG4_HUMAN Protein TBRG4	21	5.48068	6.23995	5.97663	6.26016	6.51459	6.76531	6.73096	6.87155	6.4647	6.4825	6.5682	6.74739	5.78984	5.25185	6.07735	5.77835	5.98935	6.7206	6.5657	5.72435	1.12209	1.09623	0.955754	0.16619	0.132548	-0.0652894	0.0605875	0.0222917	0.0196904	0.0600994
sp|Q5SSJ5|HP1B3_HUMAN	HP1BP3	HP1B3_HUMAN Heterochromatin protein 1-binding protein 3	18	5.631	6.44823	5.82295	6.41894	6.62373	7.25936	6.42711	6.49565	6.6137	6.82372	6.53725	6.68534	5.81686	5.31745	5.71885	5.35985	6.08028	6.70146	6.665	5.55325	1.10216	1.09617	0.913322	0.140338	0.132468	-0.130805	0.0683507	0.0568165	0.0182852	0.0453081
sp|Q6UWY0|ARSK_HUMAN	ARSK	ARSK_HUMAN Arylsulfatase K	4	5.75127	5.37404	6.23086	6.08242	6.20103	6.03991	6.39146	6.57872	6.79737	5.80359	6.27295	6.81829	6.18353	6.77054	6.72759	5.97645	5.85965	6.30278	6.42305	6.41453	1.07562	1.09615	1.0947	0.105174	0.132445	0.130529	0.0649839	0.0370351	0.0753441	0.0617071
sp|P18754-2|RCC1_HUMAN	RCC1	RCC1_HUMAN Isoform 2 of Regulator of chromosome condensation	20	5.49028	5.99167	5.98864	7.09839	6.38864	6.40543	6.6509	6.9055	6.71718	6.47964	7.09601	6.63786	5.73514	5.18376	5.68885	5.54211	6.14225	6.58762	6.73267	5.53747	1.07251	1.09613	0.901538	0.100991	0.132413	-0.14954	0.110642	0.0369593	0.038852	0.0451014
sp|P51571|SSRD_HUMAN	SSR4	SSRD_HUMAN Translocon-associated protein subunit delta	6	5.47197	5.81292	5.94384	6.20968	6.27861	6.60547	6.43663	6.60263	5.88081	6.26343	6.92834	6.61661	6.12545	6.44255	6.15083	6.23023	5.8596	6.48084	6.4223	6.23726	1.10602	1.09603	1.06445	0.145377	0.132287	0.0901108	0.0523316	0.0241054	0.0703437	0.0230791
sp|Q8N1F7|NUP93_HUMAN	NUP93	NUP93_HUMAN Nuclear pore complex protein Nup93	39	5.62866	6.31629	5.93319	6.45435	6.44526	6.9176	6.66216	6.97858	6.63432	6.65124	6.66042	6.72196	5.62894	5.08562	5.78432	5.4971	6.08312	6.7509	6.66698	5.49899	1.10978	1.09598	0.903976	0.150268	0.132222	-0.145644	0.0615961	0.0363763	0.00573139	0.0544724
sp|Q16549|PCSK7_HUMAN	PCSK7	PCSK7_HUMAN Proprotein convertase subtilisin/kexin type 7	1	5.95763	3.69813	7.09991	7.04935	5.78257	5.21528	7.96229	6.09553	6.65592	7.95841	6.65976	4.81364	5.59187	5.53742	4.80971	9.11258	5.95126	6.26392	6.52193	6.2629	1.05254	1.09589	1.05237	0.0738713	0.132106	0.0736358	0.267479	0.189884	0.198316	0.308637
sp|Q16539|MK14_HUMAN	MAPK14	MK14_HUMAN Mitogen-activated protein kinase 14	16	5.71007	6.00006	5.9137	6.50292	6.30256	6.26428	6.85189	6.81363	6.59712	6.6836	6.55622	6.60306	6.04492	5.30995	5.97477	5.87124	6.03169	6.55809	6.61	5.80022	1.08727	1.09588	0.961625	0.120714	0.132089	-0.0564541	0.055848	0.0484791	0.00806384	0.0576774
sp|O14980|XPO1_HUMAN	XPO1	XPO1_HUMAN Exportin-1	78	5.57019	6.22265	5.97695	6.38726	6.57245	6.87075	6.65344	6.91728	6.52848	6.56865	6.66344	6.71127	5.68536	5.22486	5.82196	5.62502	6.03926	6.75348	6.61796	5.5893	1.11826	1.09582	0.925494	0.161259	0.132014	-0.111705	0.0588263	0.024683	0.0127063	0.0458998
sp|Q8IV01|SYT12_HUMAN	SYT12	SYT12_HUMAN Synaptotagmin-12	1	4.74782	6.29244	6.54407	6.22532	5.73693	5.01149	6.8443	6.0497	6.91708	6.13067	6.16671	6.87607	7.55024	6.54084	6.97457	5.39174	5.95241	5.91061	6.52263	6.61435	0.992976	1.0958	1.1112	-0.0101687	0.13198	0.152124	0.136869	0.128468	0.0662871	0.138175
sp|P22694-2|KAPCB_HUMAN	PRKACB	KAPCB_HUMAN Isoform 2 of cAMP-dependent protein kinase catalytic subunit beta	18	5.05964	5.77065	5.99311	7.11058	6.22836	6.11298	6.46473	6.97059	6.57128	5.91368	6.97975	6.76139	6.09561	5.4488	6.40953	6.10931	5.98349	6.44416	6.55652	6.01581	1.07699	1.09577	1.0054	0.107005	0.131943	0.00777118	0.142114	0.059009	0.0701457	0.0672919
sp|Q12968|NFAC3_HUMAN	NFATC3	NFAC3_HUMAN Nuclear factor of activated T-cells, cytoplasmic 3	4	5.58748	5.98827	5.84488	6.13016	6.59513	7.13427	5.98612	6.23539	6.18911	6.43884	6.56536	6.61282	6.10455	6.5399	6.15596	5.89178	5.8877	6.48773	6.45153	6.17305	1.10191	1.09576	1.04847	0.14001	0.131938	0.0682793	0.0393303	0.0768028	0.0294091	0.0437361
sp|O60318|GANP_HUMAN	MCM3AP	GANP_HUMAN Germinal-center associated nuclear protein	9	5.67209	5.96329	6.08801	6.41171	6.66099	6.49007	6.4809	6.67023	6.63153	6.63705	6.65901	6.51665	5.81454	5.98221	5.65017	5.67155	6.03377	6.57555	6.61106	5.77962	1.08979	1.09568	0.957878	0.12405	0.131821	-0.0620869	0.0507734	0.0158361	0.00968821	0.0265611
sp|Q96SW2|CRBN_HUMAN	CRBN	CRBN_HUMAN Protein cereblon	3	5.86991	6.13603	6.00525	6.79925	5.99833	5.88362	6.27817	6.6477	7.17829	6.16356	6.95356	6.88709	6.19465	5.02042	6.16832	5.81584	6.20261	6.20195	6.79563	5.79981	0.999894	1.09561	0.935059	-0.000152358	0.131731	-0.0968704	0.0664771	0.0548607	0.064661	0.0944068
sp|P13498|CY24A_HUMAN	CYBA	CY24A_HUMAN Cytochrome b-245 light chain	5	5.77554	6.02297	6.28717	6.375	6.88588	6.34406	6.59696	6.28868	6.56333	6.82049	6.7751	6.63917	5.70933	5.4718	5.71767	5.72684	6.11517	6.52889	6.69952	5.65641	1.06766	1.09556	0.92498	0.0944462	0.131666	-0.112506	0.0443785	0.041847	0.0177735	0.0217949
sp|P16615|AT2A2_HUMAN	ATP2A2	AT2A2_HUMAN Sarcoplasmic/endoplasmic reticulum calcium ATPase 2	53	5.50257	6.28046	6.02292	6.31193	6.55838	6.85602	6.85068	7.00788	6.67285	6.60996	6.58493	6.55466	5.6788	5.1804	5.87733	5.45022	6.02947	6.81824	6.6056	5.54669	1.13082	1.09555	0.91993	0.177368	0.131658	-0.120405	0.0620891	0.0275651	0.00760141	0.0541114
sp|Q9NX07|TSAP1_HUMAN	TRNAU1AP	TSAP1_HUMAN tRNA selenocysteine 1-associated protein 1	8	5.66504	6.06399	6.09516	6.36901	6.18575	6.30198	6.62563	6.95188	6.52802	6.20746	7.11058	6.65839	5.90163	5.37867	6.28341	5.67342	6.0483	6.51631	6.62611	5.80928	1.07738	1.09553	0.960482	0.107526	0.131633	-0.0581697	0.0479364	0.0529296	0.0565116	0.0657147
sp|Q9UKD1|GMEB2_HUMAN	GMEB2	GMEB2_HUMAN Glucocorticoid modulatory element-binding protein 2	2	5.45643	5.94447	6.62052	6.61002	5.79942	5.75964	6.38021	6.1482	6.7456	5.9971	7.51318	6.72796	5.30896	6.08936	6.75401	6.14492	6.15786	6.02187	6.74596	6.07431	0.977916	1.0955	0.986432	-0.0322181	0.131595	-0.0197079	0.0916744	0.0491324	0.091769	0.0975325
tr|I3L2E1|I3L2E1_HUMAN	CLUAP1	I3L2E1_HUMAN Clusterin-associated protein 1	3	5.65031	6.04741	5.87512	6.67472	6.71433	6.67299	6.61615	7.58328	7.04764	6.82732	6.38433	6.30292	5.13353	4.89316	6.01376	5.56301	6.06189	6.89669	6.64055	5.40086	1.13771	1.09546	0.890954	0.186136	0.131536	-0.166577	0.0725378	0.0666254	0.0536128	0.0914078
sp|Q15386|UBE3C_HUMAN	UBE3C	UBE3C_HUMAN Ubiquitin-protein ligase E3C	15	5.66176	6.11687	5.92923	6.62576	6.62368	6.70928	6.72468	6.89922	6.73069	6.48044	6.53024	6.91511	5.67236	5.25117	5.62414	5.50537	6.0834	6.73921	6.66412	5.51326	1.1078	1.09546	0.906279	0.147701	0.131535	-0.141973	0.066895	0.0171463	0.0298974	0.0341524
sp|O95900|TRUB2_HUMAN	TRUB2	TRUB2_HUMAN Probable tRNA pseudouridine synthase 2	8	4.98051	6.34945	6.00578	6.8254	6.40171	6.82676	7.21948	6.04081	6.5287	6.71924	6.35018	6.86845	5.83312	5.19368	6.29923	5.55749	6.04029	6.62219	6.61664	5.72088	1.09634	1.09542	0.947121	0.132692	0.131483	-0.0783795	0.129525	0.0772561	0.034094	0.0814719
sp|Q96EY5|MB12A_HUMAN	MVB12A	MB12A_HUMAN Multivesicular body subunit 12A	8	5.69641	5.82812	5.98796	6.36892	6.00218	6.30145	6.36984	6.36105	6.23661	6.48076	6.73991	6.70166	6.10361	5.97699	6.73657	6.10795	5.97035	6.25863	6.53973	6.23128	1.04828	1.09537	1.0437	0.0680308	0.131416	0.0617124	0.048779	0.0277449	0.0354953	0.0549312
sp|O60502|NCOAT_HUMAN	MGEA5	NCOAT_HUMAN Bifunctional protein NCOAT	40	5.38135	6.2378	5.92752	6.39922	6.4097	6.65513	6.65103	7.02156	6.44477	6.38217	6.67259	6.72973	5.84143	5.24778	6.07491	5.9233	5.98647	6.68436	6.55732	5.77186	1.11658	1.09536	0.96415	0.159082	0.131399	-0.0526711	0.0749014	0.0377588	0.025874	0.0628091
sp|O00623|PEX12_HUMAN	PEX12	PEX12_HUMAN Peroxisome assembly protein 12	2	5.89024	5.75916	6.45072	6.21773	5.72144	6.19172	6.6408	7.09551	6.45602	6.60296	7.23063	6.34696	6.18682	5.7583	5.64769	5.8033	6.07946	6.41237	6.65914	5.84903	1.05476	1.09535	0.962096	0.0769133	0.131393	-0.055747	0.0516109	0.0920375	0.059342	0.0400912
sp|Q96I51|WBS16_HUMAN	WBSCR16	WBS16_HUMAN Williams-Beuren syndrome chromosomal region 16 protein	7	5.5358	6.22291	6.4261	5.85624	6.29242	6.56346	6.57541	6.69549	6.19419	6.65087	6.85666	6.63067	6.16472	5.34732	6.13804	5.84968	6.01026	6.53169	6.5831	5.87494	1.08676	1.09531	0.977485	0.120029	0.131339	-0.0328539	0.0656438	0.0260721	0.0423285	0.0646079
sp|P54619-3|AAKG1_HUMAN	PRKAG1	AAKG1_HUMAN Isoform 3 of 5'-AMP-activated protein kinase subunit gamma-1	13	5.29623	6.09078	5.84317	6.48632	6.30685	6.4675	6.43436	6.61997	6.31983	6.38359	6.51498	6.75746	6.18492	5.67979	6.30746	6.30679	5.92912	6.45717	6.49396	6.11974	1.08906	1.09527	1.03215	0.123083	0.13128	0.0456511	0.0840221	0.0199385	0.0298035	0.0488426
sp|Q01130|SRSF2_HUMAN	SRSF2	SRSF2_HUMAN Serine/arginine-rich splicing factor 2	5	5.73456	6.14738	5.57704	6.30364	6.94286	7.06053	6.34249	6.45192	6.68433	6.67434	6.43595	6.23129	6.23545	6.22116	5.04452	5.91253	5.94065	6.69945	6.50648	5.85342	1.12773	1.09525	0.985315	0.173421	0.131255	-0.0213434	0.0574292	0.0530065	0.0332621	0.0955787
sp|Q8NI08-2|NCOA7_HUMAN	NCOA7	NCOA7_HUMAN Isoform 2 of Nuclear receptor coactivator 7	8	5.53574	5.8842	6.20429	6.31196	6.42552	6.06147	6.41223	6.62434	6.25446	6.41526	6.63992	6.90589	5.929	5.57278	6.43675	6.38619	5.98405	6.38089	6.55388	6.08118	1.06632	1.09523	1.01623	0.092636	0.131228	0.0232297	0.0584476	0.0366723	0.0431729	0.0672062
sp|P50851|LRBA_HUMAN	LRBA	LRBA_HUMAN Lipopolysaccharide-responsive and beige-like anchor protein	89	5.4317	5.97252	6.18357	6.50769	6.313	6.48133	6.67236	6.85071	6.59891	6.33585	6.78573	6.66866	5.89824	5.37999	6.07431	5.84544	6.02387	6.57935	6.59729	5.7995	1.09221	1.09519	0.962752	0.127254	0.131182	-0.0547634	0.0750334	0.0354106	0.0288869	0.0510895
sp|Q0P5N6|ARL16_HUMAN	ARL16	ARL16_HUMAN ADP-ribosylation factor-like protein 16	1	6.59759	5.92966	5.64748	6.73968	4.17135	5.92757	6.87962	4.93427	5.22154	6.83705	7.81005	7.41715	6.90468	7.16746	5.71543	6.09942	6.2286	5.4782	6.82145	6.47175	0.879524	1.09518	1.03904	-0.185206	0.131169	0.0552468	0.0841635	0.215204	0.166977	0.104878
sp|P39656|OST48_HUMAN	DDOST	OST48_HUMAN Dolichyl-diphosphooligosaccharide--protein glycosyltransferase 48 kDa subunit	41	5.32988	5.98615	6.18013	6.26045	6.30992	7.17165	6.80514	6.63094	6.29525	6.3749	6.85016	6.49722	5.86576	5.27397	6.34062	5.82785	5.93915	6.72941	6.50438	5.82705	1.13306	1.09517	0.981125	0.180223	0.131155	-0.0274914	0.0710853	0.0533711	0.0376711	0.07488
sp|Q96JB5|CK5P3_HUMAN	CDK5RAP3	CK5P3_HUMAN CDK5 regulatory subunit-associated protein 3	21	5.55186	6.04327	6.06533	6.49461	6.44315	6.49987	6.79716	6.81008	6.60428	6.38151	6.73296	6.73405	5.80077	5.36331	5.92949	5.7483	6.03877	6.63757	6.6132	5.71047	1.09916	1.09512	0.945635	0.1364	0.131094	-0.0806453	0.0638208	0.0291084	0.0251072	0.0426648
sp|O43264|ZW10_HUMAN	ZW10	ZW10_HUMAN Centromere/kinetochore protein zw10 homolog	22	5.58118	6.15795	6.103	6.67036	6.46153	6.57667	6.6029	6.8979	6.84505	6.41705	6.73687	6.84497	5.54008	5.30645	5.65652	5.6015	6.12812	6.63475	6.71098	5.52614	1.08267	1.09511	0.901767	0.114597	0.131079	-0.149174	0.0726535	0.0280143	0.0301713	0.0278652
sp|Q13107|UBP4_HUMAN	USP4	UBP4_HUMAN Ubiquitin carboxyl-terminal hydrolase 4	18	5.78338	6.08881	5.84426	6.76191	6.20647	6.40734	6.40958	6.9004	6.59693	6.68106	6.79836	6.72981	5.87732	5.38013	5.67478	5.85945	6.11959	6.48095	6.70154	5.69792	1.05905	1.0951	0.931095	0.0827697	0.131058	-0.103	0.073223	0.0455803	0.0126429	0.0405055
sp|Q9HCE0|EPG5_HUMAN	EPG5	EPG5_HUMAN Ectopic P granules protein 5 homolog	3	6.09937	6.44291	5.52916	6.63431	6.77375	6.80665	5.96348	6.3465	6.25891	7.38433	6.50025	6.91148	5.30761	5.7764	5.72885	5.53605	6.17644	6.4726	6.76374	5.58723	1.04795	1.09509	0.904604	0.0675693	0.131047	-0.144642	0.078518	0.0616305	0.0729931	0.0381984
sp|Q9BTE3|MCMBP_HUMAN	MCMBP	MCMBP_HUMAN Mini-chromosome maintenance complex-binding protein	31	5.23716	6.06656	5.90113	6.35668	6.44274	6.66352	6.68494	7.0158	6.3739	6.28747	6.58859	6.55053	5.95995	5.30613	6.53733	6.02758	5.89038	6.70175	6.45012	5.95775	1.13774	1.09503	1.01144	0.186177	0.130965	0.0164057	0.0805453	0.0352536	0.0222015	0.0847817
sp|Q96KG9|NTKL_HUMAN	SCYL1	NTKL_HUMAN N-terminal kinase-like protein	28	5.2779	6.15433	6.15808	6.42637	6.37965	6.54393	6.70319	7.00227	6.52294	6.27137	6.8245	6.68003	5.8961	5.03205	6.18865	5.93865	6.00417	6.65726	6.57471	5.76386	1.10877	1.09502	0.959977	0.148964	0.130962	-0.0589289	0.083384	0.0398418	0.0360125	0.0875551
sp|Q15042|RB3GP_HUMAN	RAB3GAP1	RB3GP_HUMAN Rab3 GTPase-activating protein catalytic subunit	17	5.65028	6.05102	5.96314	6.51248	6.53419	6.55163	6.57345	6.84908	6.65794	6.39472	6.56172	6.85967	5.88538	5.56274	5.79484	5.59773	6.04423	6.62709	6.61851	5.71017	1.09643	1.09501	0.944731	0.132816	0.130948	-0.0820242	0.0589664	0.022463	0.0293262	0.0271767
sp|P46060|RAGP1_HUMAN	RANGAP1	RAGP1_HUMAN Ran GTPase-activating protein 1	38	5.50822	6.22265	5.88935	6.19903	6.5022	6.67878	6.70504	6.90375	6.56392	6.46844	6.57258	6.47637	5.8591	5.49385	6.18321	5.77352	5.95481	6.69744	6.52033	5.82742	1.12471	1.09497	0.978607	0.169554	0.130888	-0.0311988	0.0561261	0.0245476	0.0085185	0.0487146
sp|Q9BVQ7|SPA5L_HUMAN	SPATA5L1	SPA5L_HUMAN Spermatogenesis-associated protein 5-like protein 1	17	5.59856	6.21577	6.34485	6.58243	6.44965	6.70549	6.62029	6.76698	6.72691	6.62929	7.00202	6.73199	5.56689	5.4223	5.41246	5.22412	6.1854	6.6356	6.77255	5.40644	1.07278	1.09493	0.874065	0.10136	0.130832	-0.194188	0.0678479	0.0207651	0.0236414	0.0259989
sp|Q9UGJ0|AAKG2_HUMAN	PRKAG2	AAKG2_HUMAN 5'-AMP-activated protein kinase subunit gamma-2	9	5.41658	6.10077	5.94085	6.44838	6.00459	6.55211	6.47527	6.56353	6.34955	6.55395	6.70319	6.56873	6.20848	5.51238	6.33343	6.26823	5.97665	6.39888	6.54386	6.08063	1.07065	1.0949	1.0174	0.0984824	0.130805	0.024885	0.0718296	0.0415327	0.0222961	0.0628643
sp|Q7Z4W1|DCXR_HUMAN	DCXR	DCXR_HUMAN L-xylulose reductase	19	5.52451	6.35409	5.77897	6.20016	6.59194	6.59815	6.5755	6.75831	6.57634	6.47443	6.65675	6.41201	6.09909	5.50248	6.268	5.62929	5.96443	6.63098	6.52988	5.87472	1.11175	1.0948	0.984958	0.152836	0.130672	-0.021866	0.0638673	0.0128829	0.0165937	0.0624512
sp|O43318|M3K7_HUMAN	MAP3K7	M3K7_HUMAN Mitogen-activated protein kinase kinase kinase 7	9	5.68073	5.8823	6.24856	6.18579	6.39214	6.29207	6.4857	6.62437	6.5757	6.40456	6.55086	6.74126	6.21954	5.53501	6.153	6.0284	5.99934	6.44857	6.5681	5.98399	1.07488	1.0948	0.99744	0.104174	0.13067	-0.00369784	0.044319	0.0219235	0.021002	0.0517423
sp|Q86WH2|RASF3_HUMAN	RASSF3	RASF3_HUMAN Ras association domain-containing protein 3	2	6.24327	5.29419	6.16881	6.51073	6.70509	6.68258	6.49455	7.33402	6.26449	6.43306	6.64804	7.1668	5.9131	5.22315	5.64272	5.2754	6.05425	6.80406	6.6281	5.51359	1.12385	1.09478	0.910698	0.168448	0.130647	-0.134956	0.0871367	0.0537471	0.0591329	0.0589915
sp|O43676|NDUB3_HUMAN	NDUFB3	NDUB3_HUMAN NADH dehydrogenase [ubiquinone] 1 beta subcomplex subunit 3	6	5.45283	5.61847	6.26533	6.35137	6.17431	5.84434	6.50853	6.42738	6.33344	6.16105	6.76917	6.66941	6.23863	6.16178	6.37674	6.64722	5.922	6.23864	6.48327	6.35609	1.05347	1.09478	1.0733	0.0751471	0.130637	0.102056	0.0764234	0.0479156	0.0438678	0.0335885
sp|P42704|LPPRC_HUMAN	LRPPRC	LPPRC_HUMAN Leucine-rich PPR motif-containing protein, mitochondrial	129	5.49311	6.22287	5.90568	6.4411	6.53737	6.65496	6.79119	7.04954	6.73099	6.43758	6.58882	6.58501	5.78799	5.24344	5.94579	5.58455	6.01569	6.75826	6.5856	5.64044	1.12344	1.09474	0.937622	0.167923	0.130585	-0.0929219	0.068478	0.0325742	0.0181918	0.0537499
sp|O00203|AP3B1_HUMAN	AP3B1	AP3B1_HUMAN AP-3 complex subunit beta-1	43	5.51307	6.10679	5.93545	6.44242	6.47322	6.86844	6.84604	6.84978	6.65099	6.47805	6.5778	6.56285	5.80546	5.24276	5.9774	5.66946	5.99943	6.75937	6.56742	5.67377	1.12667	1.09467	0.945718	0.172063	0.130501	-0.0805184	0.0644414	0.0282597	0.0108026	0.0552987
sp|Q9NXD2|MTMRA_HUMAN	MTMR10	MTMRA_HUMAN Myotubularin-related protein 10	2	5.77603	5.8297	5.63062	6.61764	6.55625	6.43826	6.60124	6.89604	6.39251	6.26244	6.95405	6.5028	6.07901	5.99507	5.39156	6.07677	5.9635	6.62295	6.52795	5.8856	1.11058	1.09465	0.986938	0.151315	0.130471	-0.0189686	0.0744748	0.0293829	0.0460441	0.0563526
sp|A6NKF1|SAC31_HUMAN	SAC3D1	SAC31_HUMAN SAC3 domain-containing protein 1	2	5.6662	5.22216	5.30763	7.16493	6.20345	7.00229	6.46599	6.95859	6.18933	6.18712	6.41007	6.78442	7.08768	4.93116	5.8359	6.58306	5.84023	6.65758	6.39274	6.10945	1.13995	1.0946	1.0461	0.188973	0.130408	0.0650173	0.154761	0.0583272	0.0440012	0.153675
sp|Q9H993|CF211_HUMAN	C6orf211	CF211_HUMAN UPF0364 protein C6orf211	17	5.48543	6.20476	5.77429	6.49299	6.51641	6.92397	6.83908	7.10446	6.58724	6.29546	6.39505	6.94609	5.6872	5.1357	6.02852	5.58335	5.98937	6.84598	6.55596	5.60869	1.14302	1.0946	0.936442	0.192853	0.130403	-0.0947392	0.0746829	0.0359345	0.0437615	0.0656537
sp|Q9HAB8|PPCS_HUMAN	PPCS	PPCS_HUMAN Phosphopantothenate--cysteine ligase	18	5.48706	5.98932	5.92678	6.45125	6.20921	6.26602	6.89677	7.05952	6.57402	6.19309	6.72947	6.61287	5.99305	5.29348	6.2853	6.03282	5.9636	6.60788	6.52736	5.90116	1.10803	1.09453	0.98953	0.148003	0.130316	-0.0151849	0.0661527	0.065573	0.0356089	0.072069
sp|Q08431|MFGM_HUMAN	MFGE8	MFGM_HUMAN Lactadherin	2	5.26876	6.62329	5.04976	6.01332	5.87426	5.02372	6.7863	7.80848	6.18629	6.55285	5.60029	6.78535	5.13636	6.95595	7.44215	6.89286	5.73878	6.37319	6.2812	6.60683	1.11055	1.09452	1.15126	0.151271	0.130294	0.203214	0.125389	0.187868	0.0822445	0.152958
sp|O14802|RPC1_HUMAN	POLR3A	RPC1_HUMAN DNA-directed RNA polymerase III subunit RPC1	26	5.52925	6.20122	6.05546	6.30004	6.59006	6.73848	6.43319	6.68992	6.59649	6.42585	6.68092	6.65858	5.82563	5.65372	5.78988	5.8313	6.02149	6.61291	6.59046	5.77513	1.09822	1.09449	0.959087	0.135165	0.130258	-0.0602671	0.0569949	0.0203856	0.0175112	0.0143707
sp|Q5W0V3|F16B1_HUMAN	FAM160B1	F16B1_HUMAN Protein FAM160B1	16	5.37619	6.17386	6.02768	6.14403	6.49153	6.94317	6.82374	7.26853	6.34316	6.31719	6.54723	6.75534	5.70678	5.0543	6.09055	5.93673	5.93044	6.88174	6.49073	5.69709	1.16041	1.09448	0.960652	0.214635	0.130242	-0.0579139	0.0632067	0.0466365	0.0314616	0.08015
sp|Q5T2E6|CJ076_HUMAN	C10orf76	CJ076_HUMAN UPF0668 protein C10orf76	7	5.63937	6.01553	6.29158	6.32408	6.39214	6.5553	6.95131	6.73096	6.47961	6.46926	6.66299	6.95088	5.71499	5.28342	5.69312	5.84546	6.06764	6.65743	6.64068	5.63425	1.0972	1.09444	0.928573	0.133829	0.130197	-0.106913	0.0522941	0.0360272	0.0339016	0.0431934
sp|Q9H6X4|TM134_HUMAN	TMEM134	TM134_HUMAN Transmembrane protein 134	1	6.61626	5.65864	5.72011	5.23046	6.22511	5.64685	7.37822	6.0153	5.25669	6.31865	7.05182	6.79144	7.20965	5.42658	5.67503	7.7792	5.80637	6.31637	6.35465	6.52262	1.08784	1.09443	1.12336	0.12146	0.130177	0.167815	0.100269	0.11829	0.124694	0.176381
sp|Q04771|ACVR1_HUMAN	ACVR1	ACVR1_HUMAN Activin receptor type-1	5	5.48245	6.29612	5.94904	6.57449	6.03002	6.66625	6.69408	6.36241	6.44801	6.44843	6.63342	7.06667	5.8689	5.65243	5.9779	5.84939	6.07552	6.43819	6.64913	5.83715	1.05969	1.09441	0.960766	0.0836461	0.130157	-0.0577437	0.0775149	0.0482783	0.0438746	0.0232153
sp|Q460N5|PAR14_HUMAN	PARP14	PAR14_HUMAN Poly [ADP-ribose] polymerase 14	14	5.45715	6.02774	6.27933	6.36769	7.45956	6.33267	6.2042	6.50665	6.51053	6.40222	6.56625	6.93115	5.7844	6.10497	5.54688	5.51859	6.03298	6.62577	6.60254	5.73871	1.09826	1.09441	0.951224	0.135218	0.13015	-0.0721437	0.0679616	0.0859538	0.0347467	0.0473476
sp|Q96H20|SNF8_HUMAN	SNF8	SNF8_HUMAN Vacuolar-sorting protein SNF8	7	5.68471	6.2221	5.70949	6.34162	6.33399	6.84648	6.78373	6.58435	6.33169	6.68025	6.57767	6.6295	6.18467	5.26746	5.97028	5.85201	5.98948	6.63714	6.55478	5.8186	1.10813	1.09438	0.971471	0.14813	0.130116	-0.0417574	0.0569781	0.034795	0.0235719	0.0674354
sp|O95602|RPA1_HUMAN	POLR1A	RPA1_HUMAN DNA-directed RNA polymerase I subunit RPA1	32	5.57195	6.4195	5.95393	6.29387	6.34863	6.54904	6.52494	6.58197	6.60082	6.44033	6.73122	6.75415	5.96783	5.44934	6.0018	5.81065	6.05981	6.50114	6.63163	5.80741	1.07283	1.09436	0.958347	0.101421	0.13009	-0.0613795	0.0627212	0.0160478	0.0217605	0.0435333
sp|Q9UPT5|EXOC7_HUMAN	EXOC7	EXOC7_HUMAN Exocyst complex component 7	22	5.6045	6.18021	6.1078	6.49333	6.43769	6.61835	6.68604	7.38362	6.72017	6.50368	6.70561	6.75673	5.61889	5.11641	5.53945	5.52751	6.09646	6.78143	6.67155	5.45057	1.11235	1.09433	0.894054	0.153617	0.13005	-0.161566	0.0603927	0.0611853	0.0170813	0.0415428
sp|Q13889|TF2H3_HUMAN	GTF2H3	TF2H3_HUMAN General transcription factor IIH subunit 3	5	5.92696	5.52458	6.44102	6.08272	6.66919	6.90989	6.71444	6.97324	6.89202	6.51838	6.36732	6.45724	6.0877	5.17932	5.73012	5.52587	5.99382	6.81669	6.55874	5.63075	1.13729	1.09425	0.939426	0.185596	0.129943	-0.090148	0.0633509	0.0216607	0.0351723	0.0675073
sp|Q9HD20|AT131_HUMAN	ATP13A1	AT131_HUMAN Probable cation-transporting ATPase 13A1	19	5.6299	6.01698	6.05353	6.44135	6.50515	6.46333	6.61571	6.57443	6.56652	6.41323	6.55	6.88708	5.78434	5.63882	5.97865	5.88098	6.03544	6.53965	6.60421	5.8207	1.08354	1.09424	0.96442	0.115756	0.129926	-0.0522669	0.0549436	0.0104496	0.0303905	0.0248932
sp|Q8WV92|MITD1_HUMAN	MITD1	MITD1_HUMAN MIT domain-containing protein 1	2	5.60121	5.89758	6.04993	6.37563	6.33536	7.37611	6.73286	7.11155	6.56897	6.39013	6.41187	6.80766	5.74239	5.03871	5.91211	5.64792	5.98109	6.88897	6.54466	5.58528	1.15179	1.09423	0.933824	0.20388	0.12991	-0.0987776	0.053891	0.065868	0.029427	0.0681116
sp|O60306|AQR_HUMAN	AQR	AQR_HUMAN Intron-binding protein aquarius	28	5.55013	6.22783	6.04151	6.55751	6.36976	6.75669	6.47299	6.66785	6.68139	6.58814	6.6608	6.74325	5.65572	5.45626	5.93279	5.6374	6.09424	6.56682	6.66839	5.67054	1.07754	1.09421	0.930475	0.107748	0.129892	-0.103961	0.0690542	0.0269404	0.00959075	0.0346785
sp|Q5TBB1|RNH2B_HUMAN	RNASEH2B	RNH2B_HUMAN Ribonuclease H2 subunit B	5	5.17855	5.98903	5.85217	6.963	6.44827	6.36713	6.74401	7.13902	6.45204	6.48404	6.75827	6.54704	5.39564	5.55692	6.13716	5.98771	5.99569	6.67461	6.56035	5.76936	1.11323	1.09418	0.962251	0.154758	0.129847	-0.0555145	0.122716	0.0523495	0.0209934	0.060686
sp|Q9UKB1|FBW1B_HUMAN	FBXW11	FBW1B_HUMAN F-box/WD repeat-containing protein 11	2	5.8367	5.8924	6.06949	5.9328	6.27983	6.86356	6.86409	5.75337	6.816	6.66251	5.6353	6.85184	6.82376	6.2272	4.93549	6.55564	5.93285	6.44021	6.49141	6.13552	1.08552	1.09415	1.03416	0.118384	0.129808	0.0484615	0.0167288	0.0829602	0.088828	0.13632
sp|Q9H7F0|AT133_HUMAN	ATP13A3	AT133_HUMAN Probable cation-transporting ATPase 13A3	7	5.5779	5.99566	6.11601	6.29973	6.17201	6.86423	6.72716	6.72576	6.59692	6.74254	6.53149	6.37675	5.75218	5.4534	6.09398	5.97429	5.99733	6.62229	6.56193	5.81846	1.10421	1.09414	0.970176	0.143011	0.1298	-0.0436812	0.0510724	0.0463786	0.0231222	0.0483936
sp|Q567U6|CCD93_HUMAN	CCDC93	CCD93_HUMAN Coiled-coil domain-containing protein 93	13	5.38275	5.85365	6.10921	6.32314	6.90788	6.29999	6.5401	6.61382	6.20662	6.41398	6.77127	6.50434	5.68664	5.57495	6.42839	6.38327	5.91719	6.59045	6.47405	6.01831	1.11378	1.09411	1.01709	0.155465	0.129757	0.0244474	0.0683929	0.0380055	0.0361571	0.0747985
sp|Q9H6X2|ANTR1_HUMAN	ANTXR1	ANTR1_HUMAN Anthrax toxin receptor 1	4	5.64062	6.25779	5.9696	6.0767	5.99232	5.85813	6.29444	6.06485	5.99983	6.26131	6.87905	7.05708	6.21565	6.84453	6.10235	6.48576	5.98618	6.05244	6.54932	6.41207	1.01107	1.09407	1.07115	0.0158806	0.12971	0.0991557	0.0433103	0.0301788	0.0764166	0.0514858
sp|Q9NWQ9|CN119_HUMAN	C14orf119	CN119_HUMAN Uncharacterized protein C14orf119	1	5.33754	4.56258	4.48869	6.339	5.32365	6.25545	7.4552	4.2208	4.74045	5.81634	5.44006	6.68064	9.10318	9.63927	7.19738	7.39976	5.18195	5.81378	5.66937	8.3349	1.12193	1.09406	1.60845	0.165979	0.129693	0.685669	0.166275	0.236409	0.142562	0.146288
sp|Q13045|FLII_HUMAN	FLII	FLII_HUMAN Protein flightless-1 homolog	45	5.49379	6.077	6.19726	6.39716	6.13528	6.47317	6.65163	6.76532	6.49656	6.41569	6.85262	6.67276	5.91362	5.31026	6.14504	6.00285	6.0413	6.50635	6.60941	5.84294	1.07698	1.09404	0.967166	0.106989	0.129661	-0.0481645	0.0642508	0.0422748	0.0294195	0.0629282
sp|Q06587|RING1_HUMAN	RING1	RING1_HUMAN E3 ubiquitin-protein ligase RING1	1	5.67878	5.67483	6.31348	6.14904	5.84637	6.98376	6.53244	6.20037	6.87329	5.93064	6.84259	6.408	6.41135	6.32013	6.38075	5.45418	5.95403	6.39074	6.51363	6.1416	1.07335	1.09399	1.0315	0.102115	0.129595	0.044748	0.0549346	0.0758188	0.068003	0.0748741
sp|Q9NW81-4|AT5SL_HUMAN	ATP5SL	AT5SL_HUMAN Isoform 4 of ATP synthase subunit s-like protein	3	5.47711	6.33303	6.24221	6.54383	6.30175	6.87537	6.50878	6.7392	6.24936	6.6591	6.90227	7.09613	5.38466	5.03141	6.14177	5.51402	6.14905	6.60628	6.72671	5.51797	1.07436	1.09394	0.897369	0.103475	0.12954	-0.156226	0.0756918	0.0383263	0.0542648	0.0839434
sp|Q9NVE7|PANK4_HUMAN	PANK4	PANK4_HUMAN Pantothenate kinase 4	22	5.70566	6.10602	5.97103	6.44196	6.50835	6.64736	6.3357	6.76915	6.53952	6.59572	6.60573	6.75901	5.6517	5.50386	6.18624	5.67299	6.05617	6.56514	6.625	5.7537	1.08404	1.09393	0.950056	0.116421	0.129514	-0.0739157	0.0505735	0.0283942	0.014185	0.0517944
sp|P30153|2AAA_HUMAN	PPP2R1A	2AAA_HUMAN Serine/threonine-protein phosphatase 2A 65 kDa regulatory subunit A alpha isoform	35	5.4623	5.99223	6.04512	6.33772	6.53666	6.52114	6.97065	6.86068	6.43638	6.21583	6.82529	6.59737	5.92528	5.32082	6.18995	5.7626	5.95934	6.72228	6.51872	5.79966	1.12802	1.09387	0.973205	0.173798	0.129435	-0.0391842	0.0611706	0.0338955	0.0394792	0.0628632
sp|Q13619|CUL4A_HUMAN	CUL4A	CUL4A_HUMAN Cullin-4A	26	5.5708	6.06827	6.06337	6.82991	6.45001	6.51934	6.4792	6.71015	6.75208	6.46132	6.70687	6.91457	5.71838	5.38861	5.82604	5.54108	6.13309	6.53967	6.70871	5.61853	1.06629	1.09386	0.916101	0.0926054	0.129422	-0.126421	0.0847646	0.0179137	0.0279482	0.0343729
sp|Q9ULQ0|STRP2_HUMAN	STRIP2	STRP2_HUMAN Striatin-interacting protein 2	3	5.22445	5.73585	6.32391	6.98671	6.03525	6.24122	6.96489	6.91128	7.04503	6.41828	6.00009	7.08532	5.50421	5.40258	6.09547	6.02547	6.06773	6.53816	6.63718	5.75693	1.07753	1.09385	0.948779	0.107728	0.129414	-0.0758566	0.125203	0.0718699	0.078817	0.061508
sp|Q9HB21|PKHA1_HUMAN	PLEKHA1	PKHA1_HUMAN Pleckstrin homology domain-containing family A member 1	4	5.56147	6.17882	5.57858	6.44337	6.11236	6.35612	6.58506	6.82647	6.56634	6.72993	6.15943	6.53585	6.1792	5.95694	6.41695	5.81311	5.94056	6.47	6.49789	6.09155	1.08912	1.09382	1.02542	0.123167	0.129372	0.0362104	0.0742915	0.0473185	0.0371189	0.043352
[truncated: 7,010 more rows]

## Sheet: Filtered dataset
Uniprot Id	Gene Symbol	Description	Number of peptides	Veh_126_sn scaled	Veh_127n_sn scaled	Veh_127c_sn scaled	Veh_128n_sn scaled	25uM_130c_sn scaled	25uM_131_sn scaled	25uM_131c_sn scaled	25uM_132n_sn scaled	Average (Veh)	Average (25uM)	fold change (25uM/Veh)	log2 fold change (25uM/Veh)	CV (Veh)	CV (25uM)
[truncated: 6,794 more rows]

[truncated: 3 more sheets: Perseus exports (5uM), Perseus output (25uM), Perseus output (125uM)]
