# Supplementary material for: Assessing target engagement using proteome-wide solvent shift assays
Source: eLife. 2021 Dec 8;10:e70784. doi: 10.7554/eLife.70784 (PMC8654358; doi:10.7554/eLife.70784)
Supplement: Figure 4—source data 3. [file elife-70784-fig4-data3.xlsx]

## Sheet: Legend
This table contains solvent-PISA data for DMSO- and MK2206-treated HCT116 lysates (N=2)
The sixteen samples contained within represent one TMTpro 16plex
Full dataset tab - Unfiltered protein abundance data - 8512 proteins
Uniprot Id
Gene Symbol
Description
Number of peptides	Number of quantified peptides
Veh_W1_1 (126)	TMT SSN scaled to 100 - Window 1
Veh_W1_2 (127N)	TMT SSN scaled to 100 - Window 1
MK2206_W1 (127C)	TMT SSN scaled to 100 - Window 1
MK2206_W1_2 (128N)	TMT SSN scaled to 100 - Window 1
Veh_W2_1 (128C)	TMT SSN scaled to 100 - Window 2
Veh_W2_2 (129N)	TMT SSN scaled to 100 - Window 2
MK2206_W2_1 (129C)	TMT SSN scaled to 100 - Window 2
MK2206_W2_2 (130N)	TMT SSN scaled to 100 - Window 2
Veh_W3_1 (130C)	TMT SSN scaled to 100 - Window 3
Veh_W3_2 (131N)	TMT SSN scaled to 100 - Window 3
MK2206_W3_1 (131C)	TMT SSN scaled to 100 - Window 3
MK2206_W3_2 (132N)	TMT SSN scaled to 100 - Window 3
Veh_W4_1 (132C)	TMT SSN scaled to 100 - Window 4
Veh_W4_2 (133N)	TMT SSN scaled to 100 - Window 4
MK2206_W4_1 (133C)	TMT SSN scaled to 100 - Window 4
MK2206_W4_2 (134)	TMT SSN scaled to 100 - Window 4

## Sheet: Full dataset
Protein Id	Gene Symbol	Description	Number of peptides	Veh_W1_1	Veh_W1_2	MK2206_W1	MK2206_W1_2	Veh_W2_1	Veh_W2_2	MK2206_W2_1	MK2206_W2_2	Veh_W3_1	Veh_W3_2	MK2206_W3_1	MK2206_W3_2	Veh_W4_1	Veh_W4_2	MK2206_W4_1	MK2206_W4_2
sp|P55011|S12A2_HUMAN	SLC12A2	S12A2_HUMAN Solute carrier family 12 member 2	34	6.08453	5.45238	6.23679	6.16062	6.57544	6.95187	7.01924	6.87757	6.47574	6.55668	7.03861	6.40392	5.94757	5.75976	5.45191	5.00737
sp|Q9NYV4|CDK12_HUMAN	CDK12	CDK12_HUMAN Cyclin-dependent kinase 12	11	8.6582	9.21482	8.65279	9.04567	5.95368	5.71956	6.24068	6.0809	5.87054	5.17599	5.5708	5.57455	4.43715	5.5543	4.30349	3.9469
sp|P24941|CDK2_HUMAN	CDK2	CDK2_HUMAN Cyclin-dependent kinase 2	22	7.99488	8.04072	7.76741	7.48846	6.83053	6.36929	6.91399	6.53382	6.54258	6.00258	6.04003	6.05166	4.65972	4.91893	4.09988	3.74554
sp|P07947|YES_HUMAN	YES1	YES_HUMAN Tyrosine-protein kinase Yes	16	6.60573	6.605	6.98967	6.79602	7.0382	6.51048	7.10261	6.89467	6.97679	6.51914	7.01353	6.53839	5.54104	5.02833	4.345	3.49539
sp|P12931-2|SRC_HUMAN	SRC	SRC_HUMAN Isoform 2 of Proto-oncogene tyrosine-protein kinase Src	10	5.40521	4.6297	5.68415	5.49495	6.99454	7.40947	7.48423	7.3204	7.09153	6.99713	8.20731	6.71637	5.85964	5.16188	5.21045	4.33303
sp|P07948|LYN_HUMAN	LYN	LYN_HUMAN Tyrosine-protein kinase Lyn	18	7.32439	6.52142	7.7664	7.63958	6.76368	6.41736	6.85583	6.58347	6.31026	5.91321	6.47806	6.0526	5.17048	5.46777	4.53166	4.20383
sp|P08581|MET_HUMAN	MET	MET_HUMAN Hepatocyte growth factor receptor	28	6.73902	5.47505	6.40171	6.61988	6.40755	6.43263	6.52218	6.47844	6.55785	6.75571	6.3546	6.27022	6.26423	5.89735	5.69109	5.1325
sp|P06493|CDK1_HUMAN	CDK1	CDK1_HUMAN Cyclin-dependent kinase 1	36	8.30795	8.36718	8.47377	8.61186	6.74874	6.55677	7.0823	6.71673	6.27796	6.03762	6.14409	5.99367	3.88653	4.63955	3.24764	2.90765
sp|Q13188|STK3_HUMAN	STK3	STK3_HUMAN Serine/threonine-protein kinase 3	16	6.63987	7.20421	6.676	6.82503	6.89773	6.6056	6.75979	6.70518	6.83122	6.20075	6.8154	6.43536	5.34669	5.12301	4.73161	4.20255
sp|Q13043|STK4_HUMAN	STK4	STK4_HUMAN Serine/threonine-protein kinase 4	9	7.32467	7.46378	7.48323	7.12254	6.70718	6.52745	7.02898	6.8815	6.60364	6.4697	6.84279	6.00006	4.77344	4.8337	4.34973	3.58762
sp|P11802|CDK4_HUMAN	CDK4	CDK4_HUMAN Cyclin-dependent kinase 4	6	7.53102	7.29839	7.12812	7.36766	6.98141	6.14626	6.85498	6.94646	7.15399	6.16383	6.23786	5.74413	5.31707	5.11968	4.47423	3.53491
sp|Q00534|CDK6_HUMAN	CDK6	CDK6_HUMAN Cyclin-dependent kinase 6	14	6.67179	6.37192	6.84758	6.84866	6.60836	6.45161	6.65627	6.4472	6.85167	6.60547	6.49964	6.3601	5.46252	5.49387	5.10051	4.72283
sp|P21802-11|FGFR2_HUMAN	FGFR2	FGFR2_HUMAN Isoform 11 of Fibroblast growth factor receptor 2	3	6.19118	7.03119	6.88988	6.56372	6.42919	6.0665	6.77754	6.80853	6.3884	6.50098	7.35091	6.31418	6.17056	5.39499	5.10184	4.02039
sp|Q04912|RON_HUMAN	MST1R	RON_HUMAN Macrophage-stimulating protein receptor	11	6.83008	7.20287	7.20372	6.7755	6.71442	6.38906	6.59318	6.28197	6.66915	6.53945	6.8438	6.31904	5.5166	4.94906	4.85814	4.31397
sp|Q00535|CDK5_HUMAN	CDK5	CDK5_HUMAN Cyclin-dependent kinase 5	12	7.55134	7.38725	7.92746	8.16959	6.86866	6.23411	6.82022	6.57917	6.62234	5.79392	5.86956	6.27049	4.77738	5.24105	3.92602	3.96142
sp|Q14004|CDK13_HUMAN	CDK13	CDK13_HUMAN Cyclin-dependent kinase 13	7	8.92546	9.32337	8.8069	8.86254	6.38051	5.84274	6.35087	5.90766	6.06432	5.42093	5.96725	5.4402	4.22671	5.08276	3.84987	3.54791
sp|P50750-2|CDK9_HUMAN	CDK9	CDK9_HUMAN Isoform 2 of Cyclin-dependent kinase 9	10	8.47989	8.71796	8.18884	7.65355	6.69233	6.42282	7.08717	6.67787	6.78681	6.22357	5.89613	5.95464	4.16599	4.72497	3.26308	3.06438
sp|Q00536-2|CDK16_HUMAN	CDK16	CDK16_HUMAN Isoform 2 of Cyclin-dependent kinase 16	9	6.86754	6.59891	6.99912	6.76623	6.38356	6.48208	6.90413	6.39126	7.00139	6.32079	7.30059	6.63026	5.35815	5.41043	4.45593	4.12965
sp|Q07002-3|CDK18_HUMAN	CDK18	CDK18_HUMAN Isoform 3 of Cyclin-dependent kinase 18	6	7.56443	7.4271	7.78342	7.63459	6.70192	6.13948	7.01373	6.7123	7.12201	5.89764	6.4528	6.27087	4.3595	5.09917	4.25599	3.56503
sp|P11362-21|FGFR1_HUMAN	FGFR1	FGFR1_HUMAN Isoform 21 of Fibroblast growth factor receptor 1	3	6.63394	7.40527	8.81697	6.99525	6.39915	6.12119	6.51135	5.90472	6.46672	6.59319	6.61001	6.11343	5.00948	5.07858	4.63727	4.70349
sp|Q00537|CDK17_HUMAN	CDK17	CDK17_HUMAN Cyclin-dependent kinase 17	5	8.29354	7.77996	8.06495	7.51782	6.79313	6.44739	6.85007	6.7374	5.8848	5.75854	6.75194	6.40738	4.33824	4.91762	4.14111	3.31611
sp|P41240|CSK_HUMAN	CSK	CSK_HUMAN Tyrosine-protein kinase CSK	21	6.88739	6.64982	7.24849	7.24865	6.81015	6.66936	6.94463	6.84213	6.91814	6.55058	6.66556	6.36007	4.7636	5.19045	4.25722	3.99374
sp|P42685|FRK_HUMAN	FRK	FRK_HUMAN Tyrosine-protein kinase FRK	4	7.09581	7.66733	7.29697	7.35912	6.6898	6.33546	6.94846	6.91467	7.0294	6.81726	6.52714	6.45693	4.4644	4.87498	4.06048	3.46179
sp|P36578|RL4_HUMAN	RPL4	RL4_HUMAN 60S ribosomal protein L4	49	6.91324	6.27356	6.77767	7.14401	6.04612	5.97614	6.24065	5.97642	5.57252	5.45781	5.98783	5.59528	5.69382	6.30657	6.98693	7.05143
sp|Q6SPF0|SAMD1_HUMAN	SAMD1	SAMD1_HUMAN Atherin	3	8.08247	2.99395	7.94707	8.84187	7.08684	6.6274	7.00567	7.27547	6.51233	6.49936	7.03281	6.22801	3.94528	5.74073	4.41935	3.76138
sp|O76031|CLPX_HUMAN	CLPX	CLPX_HUMAN ATP-dependent Clp protease ATP-binding subunit clpX-like, mitochondrial	28	8.29977	7.09593	8.42705	8.28913	6.99276	6.71445	7.50128	7.05816	6.21251	5.7756	6.6277	6.02273	3.64733	4.81312	3.5521	2.97039
sp|O15265-2|ATX7_HUMAN	ATXN7	ATX7_HUMAN Isoform b of Ataxin-7	2	8.06668	5.44287	8.11951	9.28235	5.06526	6.0773	7.65759	6.5271	4.41719	5.74778	6.62175	6.06513	4.33038	6.23754	5.98003	4.36155
sp|Q8WUQ7-2|CATIN_HUMAN	CACTIN	CATIN_HUMAN Isoform 2 of Cactin	3	7.23426	8.09585	8.59153	7.74503	5.95667	5.97502	6.15267	5.84815	5.70811	5.62334	5.36199	6.198	5.28486	6.43107	5.01883	4.77463
sp|P19338|NUCL_HUMAN	NCL	NUCL_HUMAN Nucleolin	164	7.32474	7.58748	7.09953	7.07552	6.37276	5.77871	6.29651	5.90741	6.1124	5.54817	5.99403	5.62328	5.97782	5.89183	6.03457	5.37523
sp|Q9BTD8|RBM42_HUMAN	RBM42	RBM42_HUMAN RNA-binding protein 42	11	5.39899	5.61942	6.14229	5.99238	6.12156	6.38793	6.22605	6.30958	6.18061	6.20318	6.40056	6.62661	6.72691	6.29389	6.80941	6.56064
sp|Q9P258|RCC2_HUMAN	RCC2	RCC2_HUMAN Protein RCC2	52	5.18621	5.25473	5.17523	5.03171	5.88279	6.02978	5.78565	5.95529	6.13234	6.43784	6.16765	6.27426	7.56045	7.1953	8.1518	7.779
sp|Q15596|NCOA2_HUMAN	NCOA2	NCOA2_HUMAN Nuclear receptor coactivator 2	12	5.2417	4.19868	5.13706	5.23692	5.96871	6.1045	6.03714	5.99266	6.12063	6.31325	6.51395	6.19587	7.36936	7.3216	7.87802	8.36994
sp|Q9UPT8|ZC3H4_HUMAN	ZC3H4	ZC3H4_HUMAN Zinc finger CCCH domain-containing protein 4	15	5.78982	5.47797	5.91386	6.21016	5.79334	5.83877	6.01184	5.75711	5.87536	5.76416	6.66265	6.15867	6.68844	6.27546	7.9216	7.8608
sp|P52701|MSH6_HUMAN	MSH6	MSH6_HUMAN DNA mismatch repair protein Msh6	47	9.74236	10.0041	9.9051	10.0403	6.47043	6.18026	6.92104	6.6412	5.51256	5.24246	5.72561	5.53995	2.76157	4.48057	2.57314	2.25934
sp|P55036|PSMD4_HUMAN	PSMD4	PSMD4_HUMAN 26S proteasome non-ATPase regulatory subunit 4	23	5.1604	4.62353	4.98035	5.321	5.65794	5.92725	5.57604	5.72969	5.7385	6.37383	6.13378	6.14717	7.41119	7.78694	8.49085	8.94154
sp|Q99755|PI51A_HUMAN	PIP5K1A	PI51A_HUMAN Phosphatidylinositol 4-phosphate 5-kinase type-1 alpha	8	7.7585	5.83686	8.23704	8.15808	6.71275	6.64588	7.75273	6.9326	6.29875	5.96993	6.91785	5.94037	4.51684	4.77472	4.11194	3.43515
tr|Q5VWC4|Q5VWC4_HUMAN	PSMD4	Q5VWC4_HUMAN 26S proteasome non-ATPase regulatory subunit 4	1	5.07287	5.49612	5.15215	5.63468	5.5769	6.38404	5.31953	5.53428	4.78885	6.89481	5.84501	6.22582	7.23424	7.25557	8.75569	8.82942
sp|A1X283|SPD2B_HUMAN	SH3PXD2B	SPD2B_HUMAN SH3 and PX domain-containing protein 2B	41	5.35043	5.34277	5.41306	5.22453	6.31359	6.09034	6.04483	6.14009	6.69818	6.5915	6.40545	6.5098	7.85905	6.75219	7.00153	6.26265
sp|O95602|RPA1_HUMAN	POLR1A	RPA1_HUMAN DNA-directed RNA polymerase I subunit RPA1	49	7.80628	7.36645	7.64165	7.98575	6.83559	6.44643	7.11593	6.54936	6.41702	6.08017	6.68617	6.02278	4.34118	5.06613	4.16209	3.47702
sp|O14802|RPC1_HUMAN	POLR3A	RPC1_HUMAN DNA-directed RNA polymerase III subunit RPC1	25	8.29865	7.35751	8.44484	8.08486	6.74915	6.47436	7.22729	6.77731	6.38336	5.77483	6.51073	5.84105	3.9409	5.02997	3.81116	3.29403
sp|O95159|ZFPL1_HUMAN	ZFPL1	ZFPL1_HUMAN Zinc finger protein-like 1	8	6.12837	4.80891	6.23751	6.25006	6.56585	6.29539	6.15168	6.13453	6.35348	6.046	6.43383	6.50011	6.60955	6.27349	6.56903	6.64222
sp|Q6P2E9|EDC4_HUMAN	EDC4	EDC4_HUMAN Enhancer of mRNA-decapping protein 4	55	7.49113	7.32053	7.39768	7.49009	6.94136	6.79713	7.15067	6.83887	6.72658	6.44465	6.62418	6.4185	4.41225	4.57498	3.94564	3.42575
sp|Q9NQP4|PFD4_HUMAN	PFDN4	PFD4_HUMAN Prefoldin subunit 4	15	4.65445	5.28991	4.89246	5.33299	5.28123	5.75803	5.16889	5.52696	5.9183	6.41518	5.61096	6.07208	7.70615	8.19049	8.46365	9.71827
sp|Q9H9Y2|RPF1_HUMAN	RPF1	RPF1_HUMAN Ribosome production factor 1	4	7.76728	8.38195	8.00835	8.04239	6.68529	6.63755	6.92413	6.22665	5.60474	5.34289	5.98503	5.38269	4.58006	5.19638	4.76467	4.46996
sp|Q96P70|IPO9_HUMAN	IPO9	IPO9_HUMAN Importin-9	39	5.67148	5.0457	5.71184	5.47724	6.31885	6.27066	6.33174	6.07515	6.45383	6.345	6.3455	6.24333	7.16462	6.74132	7.09932	6.70442
sp|P30260-2|CDC27_HUMAN	CDC27	CDC27_HUMAN Isoform 2 of Cell division cycle protein 27 homolog	31	8.39296	9.33132	8.33646	8.08992	6.52814	6.24357	6.77382	6.42559	6.2373	5.70326	6.0274	6.03083	3.90962	4.75767	3.67984	3.53229
sp|Q9NP50|FA60A_HUMAN	FAM60A	FA60A_HUMAN Protein FAM60A	6	8.86826	9.78251	8.33149	9.04757	6.20716	6.1281	6.41005	6.14883	5.64983	5.18889	5.37647	4.94322	4.23781	5.50273	3.96814	4.20896
sp|Q01780|EXOSX_HUMAN	EXOSC10	EXOSX_HUMAN Exosome component 10	28	8.6519	8.95745	8.51388	8.69418	5.81313	5.20805	5.79153	5.69469	5.49341	4.8594	4.71734	5.13956	4.89405	7.57367	4.86696	5.13079
sp|P02786|TFR1_HUMAN	TFRC	TFR1_HUMAN Transferrin receptor protein 1	111	5.29816	4.82801	5.07116	5.13787	6.1232	6.05097	5.8442	6.04045	6.39509	6.47251	6.03641	6.3628	7.47053	7.08311	7.72908	8.05645
sp|P07954|FUMH_HUMAN	FH	FUMH_HUMAN Fumarate hydratase, mitochondrial	36	5.20323	5.36102	5.25469	4.89608	6.34906	6.1729	6.01661	6.17456	6.59894	6.48838	6.30041	6.2723	8.03416	6.8656	7.55947	6.45258
sp|Q9Y490|TLN1_HUMAN	TLN1	TLN1_HUMAN Talin-1	153	5.55172	5.50527	5.66601	5.63461	6.33863	6.60536	6.46456	6.39491	6.5999	6.73586	6.64151	6.6451	6.93337	6.22614	6.33939	5.71768
sp|Q9Y4G6|TLN2_HUMAN	TLN2	TLN2_HUMAN Talin-2	31	5.3535	10.0298	5.2954	4.91209	5.80321	6.27213	6.04851	6.08251	6.33876	6.27531	6.10275	6.06336	6.98804	6.44793	6.13311	5.85356
sp|O94826|TOM70_HUMAN	TOMM70A	TOM70_HUMAN Mitochondrial import receptor subunit TOM70	48	6.32645	6.11048	6.23205	6.14218	6.84982	6.61309	6.94516	6.76061	6.81391	6.50352	6.97873	6.36616	6.25988	5.42479	5.39017	4.283
sp|Q96P11-2|NSUN5_HUMAN	NSUN5	NSUN5_HUMAN Isoform 2 of Putative methyltransferase NSUN5	15	8.34524	8.35006	8.39106	8.5852	6.40988	6.4054	7.06419	6.60637	6.02372	6.11451	6.48318	5.66704	3.93951	4.92906	3.56332	3.12225
sp|Q8N4T8|CBR4_HUMAN	CBR4	CBR4_HUMAN Carbonyl reductase family member 4	5	5.40466	5.26696	5.56809	5.74384	5.73363	5.86709	5.56313	5.80031	6.13666	6.36991	5.97037	6.28623	7.09361	7.26934	7.90615	8.02003
sp|P23381|SYWC_HUMAN	WARS	SYWC_HUMAN Tryptophan--tRNA ligase, cytoplasmic	33	5.30749	5.08801	5.12246	5.09272	5.98848	6.05526	5.64577	5.94708	5.9034	6.18013	6.15979	6.21499	7.27739	7.26077	8.1956	8.56065
sp|P35221-2|CTNA1_HUMAN	CTNNA1	CTNA1_HUMAN Isoform 2 of Catenin alpha-1	70	4.83352	4.32792	4.83279	4.92869	5.72192	6.32597	5.76078	6.07049	5.91205	6.63912	6.07024	6.31094	7.45247	7.61628	8.337	8.85982
sp|Q96C19|EFHD2_HUMAN	EFHD2	EFHD2_HUMAN EF-hand domain-containing protein D2	35	4.9532	5.12928	4.78017	4.8698	5.43277	5.78132	5.11804	5.71384	5.66627	6.22546	5.60024	6.06851	7.70238	8.02184	8.66577	10.2711
sp|Q9GZT9|EGLN1_HUMAN	EGLN1	EGLN1_HUMAN Egl nine homolog 1	18	6.14702	6.20783	6.37985	6.48053	6.46325	5.93282	6.49757	6.26736	6.82752	6.54616	7.03376	7.02606	6.60719	5.60741	5.34764	4.62803
sp|Q96T51|RUFY1_HUMAN	RUFY1	RUFY1_HUMAN RUN and FYVE domain-containing protein 1	28	6.64308	6.57622	6.67471	6.71319	6.65114	6.4343	6.45799	6.40299	6.43149	6.31673	6.48201	6.29201	5.78154	5.79382	5.29538	5.05342
sp|P54578|UBP14_HUMAN	USP14	UBP14_HUMAN Ubiquitin carboxyl-terminal hydrolase 14	35	5.41994	5.34883	5.43849	5.43754	6.43271	6.30655	6.30122	6.34149	6.52261	6.68538	6.72427	6.35472	7.28401	6.55879	6.74257	6.10087
sp|Q5VSL9|STRP1_HUMAN	STRIP1	STRP1_HUMAN Striatin-interacting protein 1	15	6.72545	7.04188	7.01231	6.85849	7.15751	7.08511	7.50468	6.96579	6.64842	6.8137	7.14582	6.45915	4.88188	4.53563	3.88816	3.27602
sp|Q9ULQ0|STRP2_HUMAN	STRIP2	STRP2_HUMAN Striatin-interacting protein 2	3	6.14203	6.69365	7.33421	6.51621	6.66745	7.03376	7.6059	7.22571	7.3028	6.87572	6.77562	6.16854	5.45771	5.25803	3.35141	3.59125
sp|P17544-6|ATF7_HUMAN	ATF7	ATF7_HUMAN Isoform 6 of Cyclic AMP-dependent transcription factor ATF-7	1	4.85889	5.44041	4.88097	4.6543	6.15512	6.2499	4.90431	4.97221	6.69524	7.36878	5.70038	6.46688	8.55636	8.93349	6.02342	8.13935
sp|P15336|ATF2_HUMAN	ATF2	ATF2_HUMAN Cyclic AMP-dependent transcription factor ATF-2	5	4.94452	4.72134	4.66852	5.61215	5.14913	5.71935	5.21552	6.04277	5.67217	6.30766	6.42518	6.37647	7.42555	8.15262	8.53078	9.03627
sp|Q53GG5-2|PDLI3_HUMAN	PDLIM3	PDLI3_HUMAN Isoform 2 of PDZ and LIM domain protein 3	6	5.19321	4.87291	5.0403	5.83645	5.36264	5.5042	5.22326	5.4859	5.60879	6.29921	5.48162	6.70007	7.15218	7.92691	8.33221	9.98014
sp|P08107|HSP71_HUMAN	HSPA1A	HSP71_HUMAN Heat shock 70 kDa protein 1A/1B	173	5.03974	5.31325	4.78653	5.16923	5.35951	5.77966	5.10561	5.64783	5.59317	6.32585	5.6225	6.35684	7.50752	7.95063	8.69477	9.74735
sp|P34931|HS71L_HUMAN	HSPA1L	HS71L_HUMAN Heat shock 70 kDa protein 1-like	4	4.99236	6.1378	5.16597	5.06346	5.99357	5.73379	5.23837	5.64748	6.47962	6.4047	5.57896	5.75239	7.32363	7.37971	8.78105	8.32714
sp|P11021|GRP78_HUMAN	HSPA5	GRP78_HUMAN 78 kDa glucose-regulated protein	247	5.00895	5.17861	4.91393	5.09581	5.58229	5.81858	5.28685	5.72723	5.90838	6.43579	5.66968	6.27081	7.58907	7.63046	8.55019	9.33337
sp|P38646|GRP75_HUMAN	HSPA9	GRP75_HUMAN Stress-70 protein, mitochondrial	188	4.91217	4.9908	4.80682	5.0175	5.50112	5.77475	5.27699	5.68756	5.76931	6.32844	5.73553	6.33851	7.59627	7.80463	8.8634	9.59619
sp|P11142|HSP7C_HUMAN	HSPA8	HSP7C_HUMAN Heat shock cognate 71 kDa protein	465	4.97812	5.18987	4.96577	5.22274	5.41454	5.87763	5.26645	5.65509	5.68296	6.36454	5.74439	6.33185	7.33071	7.66791	8.61122	9.69622
tr|E9PN89|E9PN89_HUMAN	HSPA8	E9PN89_HUMAN Heat shock cognate 71 kDa protein (Fragment)	2	5.69712	6.33071	4.98054	5.39106	4.90332	3.35752	2.93094	3.44011	6.45383	5.22458	3.04573	5.37297	9.64303	9.32512	10.6164	13.287
tr|E9PQK7|E9PQK7_HUMAN	HSPA8	E9PQK7_HUMAN Heat shock cognate 71 kDa protein (Fragment)	2	5.99145	7.38981	5.15137	5.34649	4.81523	3.36665	3.25443	3.75721	7.09633	5.75549	3.24637	6.28259	8.86126	8.3259	9.26599	12.0934
sp|P54652|HSP72_HUMAN	HSPA2	HSP72_HUMAN Heat shock-related 70 kDa protein 2	6	5.09225	5.15219	5.35405	5.15938	5.45122	6.04569	5.95198	5.95283	5.83516	6.35028	5.79245	6.45086	7.41168	7.40027	8.38663	8.21309
sp|B2RTY4-4|MYO9A_HUMAN	MYO9A	MYO9A_HUMAN Isoform 4 of Unconventional myosin-IXa	5	6.87498	8.64439	6.67463	6.54325	5.94255	5.73077	5.7122	5.34089	6.14884	5.36854	5.19769	6.52432	6.38276	6.07474	5.99031	6.84915
sp|Q13459|MYO9B_HUMAN	MYO9B	MYO9B_HUMAN Unconventional myosin-IXb	26	8.9114	9.09577	8.79039	8.87688	6.34208	5.98626	6.55696	6.52328	6.15862	5.36059	5.72215	5.65877	4.03004	5.85104	3.27309	2.86267
sp|Q8TAE8|G45IP_HUMAN	GADD45GIP1	G45IP_HUMAN Growth arrest and DNA damage-inducible proteins-interacting protein 1	13	5.35945	5.54143	5.12155	5.33482	5.78679	5.972	5.477	5.75958	6.27154	6.58947	5.80832	6.48218	7.12705	7.17881	7.77138	8.41862
sp|Q8IYS1|P20D2_HUMAN	PM20D2	P20D2_HUMAN Peptidase M20 domain-containing protein 2	18	4.95211	4.9171	5.08756	5.37002	5.52063	6.15414	5.5053	5.90888	5.78574	6.52168	6.12152	6.58203	7.05603	7.51865	8.02391	8.9747
sp|O15269|SPTC1_HUMAN	SPTLC1	SPTC1_HUMAN Serine palmitoyltransferase 1	13	8.52542	8.51491	8.41583	8.32109	6.88899	6.67256	7.25474	6.64237	6.14226	5.8907	6.5218	6.07157	3.72662	4.4882	3.15895	2.76398
sp|Q7Z392|TPC11_HUMAN	TRAPPC11	TPC11_HUMAN Trafficking protein particle complex subunit 11	20	7.13665	6.4759	7.5253	7.38506	6.99733	6.66411	7.08302	6.52009	6.71847	6.24078	6.68339	6.28789	4.92183	5.44162	4.39583	3.52275
sp|Q6JQN1-5|ACD10_HUMAN	ACAD10	ACD10_HUMAN Isoform 5 of Acyl-CoA dehydrogenase family member 10	9	8.46649	8.47044	8.15749	7.9503	6.79069	6.57667	6.95085	6.52756	6.25787	5.59269	6.17835	5.86643	4.39555	4.71626	3.72961	3.37275
sp|P05091|ALDH2_HUMAN	ALDH2	ALDH2_HUMAN Aldehyde dehydrogenase, mitochondrial	32	5.49641	5.53839	5.59913	5.16907	6.20645	6.27377	6.42259	6.17489	6.51629	6.29496	6.50802	6.24883	6.99617	6.39912	7.35686	6.79906
sp|P05091-2|ALDH2_HUMAN	ALDH2	ALDH2_HUMAN Isoform 2 of Aldehyde dehydrogenase, mitochondrial	1	6.17204	5.26346	6.12849	5.57447	5.69114	3.76837	4.22676	3.88321	7.69579	6.60898	4.62238	5.85817	8.16884	7.66934	9.04983	9.61874
sp|P47895|AL1A3_HUMAN	ALDH1A3	AL1A3_HUMAN Aldehyde dehydrogenase family 1 member A3	46	5.22808	5.25108	5.05073	5.22724	5.5747	5.92377	5.41923	5.69324	5.8081	6.21512	5.67109	6.12144	7.48113	7.53736	8.41803	9.37965
sp|P30837|AL1B1_HUMAN	ALDH1B1	AL1B1_HUMAN Aldehyde dehydrogenase X, mitochondrial	31	7.00188	6.63539	7.40754	7.00355	6.89255	6.31449	7.15377	6.40695	6.84889	6.13543	6.81094	6.16597	5.58781	4.951	4.93147	3.75237
tr|Q5SYQ7|Q5SYQ7_HUMAN	ALDH1A1	Q5SYQ7_HUMAN Retinal dehydrogenase 1 (Fragment)	1	5.69447	13.3757	6.18626	4.48356	5.0452	5.8623	4.93551	5.60394	6.43732	4.83968	4.68554	5.53339	5.85191	7.72321	6.49281	7.2492
sp|P31948|STIP1_HUMAN	STIP1	STIP1_HUMAN Stress-induced-phosphoprotein 1	117	5.51458	5.77035	5.15967	5.34139	5.83131	6.00548	5.543	5.93382	5.84197	6.18073	5.86621	6.11744	6.77567	6.98014	8.19762	8.94064
sp|O95273|CCDB1_HUMAN	CCNDBP1	CCDB1_HUMAN Cyclin-D1-binding protein 1	8	5.5122	6.46512	5.77162	6.04813	6.03484	6.00167	6.61759	6.27583	6.45556	6.77172	6.72773	6.55445	6.68663	6.09173	6.12891	5.85628
sp|O60885|BRD4_HUMAN	BRD4	BRD4_HUMAN Bromodomain-containing protein 4	15	5.77035	5.32041	5.69696	5.65015	6.06214	6.01999	5.89268	5.89424	6.29301	6.00302	6.1231	6.28642	7.01422	6.48605	7.91777	7.56949
sp|P25440-2|BRD2_HUMAN	BRD2	BRD2_HUMAN Isoform 2 of Bromodomain-containing protein 2	11	5.84187	6.10771	5.38963	5.62001	5.87322	5.71767	5.63109	5.8231	6.36286	6.19486	5.46586	6.15142	6.98361	6.68819	7.90856	8.24034
sp|P98172|EFNB1_HUMAN	EFNB1	EFNB1_HUMAN Ephrin-B1	6	4.94405	4.87657	4.84207	5.18395	5.52606	5.85182	5.34037	6.02253	5.76169	6.45381	5.50182	6.27105	7.73032	7.9361	8.32771	9.43009
sp|O60716|CTND1_HUMAN	CTNND1	CTND1_HUMAN Catenin delta-1	33	9.09704	9.14749	9.22827	9.14428	6.80661	6.56938	7.40961	6.92882	5.71846	5.48359	6.33632	5.59818	3.0757	4.54216	2.68198	2.23212
sp|Q14498|RBM39_HUMAN	RBM39	RBM39_HUMAN RNA-binding protein 39	14	7.59742	6.80627	7.8414	7.90446	6.47122	6.29303	6.63001	6.34961	5.9204	5.79687	6.28079	5.90406	5.10348	5.69001	4.88776	4.52322
sp|Q86U06|RBM23_HUMAN	RBM23	RBM23_HUMAN Probable RNA-binding protein 23	3	5.97949	4.85538	6.43902	6.49518	6.58842	6.62239	6.81193	6.42435	6.7165	6.25178	6.38591	7.91106	5.79963	5.91017	5.31116	5.49763
sp|Q15042|RB3GP_HUMAN	RAB3GAP1	RB3GP_HUMAN Rab3 GTPase-activating protein catalytic subunit	29	8.25197	8.34955	9.10558	7.9948	6.74894	6.5776	7.04571	6.73941	6.37645	5.8154	6.30704	6.06228	3.98758	4.48846	3.43244	2.71679
sp|P26641|EF1G_HUMAN	EEF1G	EF1G_HUMAN Elongation factor 1-gamma	74	6.90575	7.02882	6.74966	6.46511	6.53252	6.74384	6.98144	6.8092	6.96621	6.55422	6.9479	6.45069	5.43117	5.11033	4.46053	3.86263
sp|P20810-6|ICAL_HUMAN	CAST	ICAL_HUMAN Isoform 6 of Calpastatin	60	4.90758	5.49428	4.69606	5.11039	5.21712	5.44672	4.90951	5.42853	5.60219	6.25195	5.43251	6.34124	7.81444	7.99803	9.00934	10.3401
sp|Q8N5W9|F101B_HUMAN	FAM101B	F101B_HUMAN Protein FAM101B	3	6.92162	6.02616	6.78082	7.30295	6.82929	6.2837	7.28549	6.51384	6.22789	5.92032	7.28736	6.59942	5.09133	4.88839	5.03726	5.00416
sp|P31350-2|RIR2_HUMAN	RRM2	RIR2_HUMAN Isoform 2 of Ribonucleoside-diphosphate reductase subunit M2	47	5.01404	5.14485	4.80233	5.02694	5.63752	6.4013	5.60371	6.12199	5.54944	6.42348	6.03074	6.37743	7.17932	7.58644	8.07166	9.02881
sp|Q7LG56-6|RIR2B_HUMAN	RRM2B	RIR2B_HUMAN Isoform 6 of Ribonucleoside-diphosphate reductase subunit M2 B	8	5.61704	6.08308	5.32584	5.2322	5.79843	6.26013	5.58852	5.88362	6.10517	6.29479	5.86968	6.4533	7.14986	7.21551	7.4905	7.63234
sp|Q16643-3|DREB_HUMAN	DBN1	DREB_HUMAN Isoform 3 of Drebrin	42	4.9278	5.13368	4.96328	5.00537	5.4787	5.92977	5.40891	5.68791	5.64305	6.45405	5.82542	6.08062	7.6713	7.85622	8.83674	9.09717
sp|Q8TF74|WIPF2_HUMAN	WIPF2	WIPF2_HUMAN WAS/WASL-interacting protein family member 2	14	5.05278	5.60008	5.06071	5.07208	5.46287	5.50598	5.41246	5.74635	6.12822	6.07653	5.78914	6.32792	7.68768	7.39631	8.54689	9.13399
sp|P53618|COPB_HUMAN	COPB1	COPB_HUMAN Coatomer subunit beta	61	7.47865	7.16561	7.56464	7.69052	6.71357	6.77098	7.06133	6.86748	6.47111	6.35893	6.61165	6.25022	4.42359	4.87799	4.02425	3.66947
sp|Q96N21|AP4AT_HUMAN	ENTHD2	AP4AT_HUMAN AP-4 complex accessory subunit tepsin	4	5.71199	5.49532	5.24921	5.32022	6.07031	6.14137	6.18383	6.41411	6.06537	6.7955	6.84284	6.68005	7.40079	6.92002	6.03614	6.67293
sp|O14981|BTAF1_HUMAN	BTAF1	BTAF1_HUMAN TATA-binding protein-associated factor 172	33	8.20779	7.91203	8.27921	8.36659	6.57116	6.47358	7.18664	6.67553	6.31347	5.95681	6.03696	5.77038	3.98978	5.12113	3.68644	3.45251
sp|O95801|TTC4_HUMAN	TTC4	TTC4_HUMAN Tetratricopeptide repeat protein 4	12	6.57625	6.42446	6.39834	6.2811	6.88892	6.40458	6.7827	6.70578	7.1391	6.59226	6.96282	6.76444	6.10189	5.2544	4.99504	3.72792
sp|Q9H2M9|RBGPR_HUMAN	RAB3GAP2	RBGPR_HUMAN Rab3 GTPase-activating protein non-catalytic subunit	37	7.9549	9.68609	7.84774	7.68771	6.84475	6.45369	6.87368	6.51612	6.48254	5.81435	6.19836	5.82439	4.38938	4.6167	3.6433	3.16631
sp|Q9P1Y5-2|CAMP3_HUMAN	CAMSAP3	CAMP3_HUMAN Isoform 2 of Calmodulin-regulated spectrin-associated protein 3	8	7.50765	6.75591	7.94526	7.55641	6.48042	6.81066	6.95611	6.46222	6.14429	6.37492	6.35196	6.24825	5.01798	4.99575	4.43516	3.95705
sp|Q9UNS1|TIM_HUMAN	TIMELESS	TIM_HUMAN Protein timeless homolog	33	7.51367	7.20727	7.59252	7.68047	6.44431	6.50786	6.71374	6.63791	5.83115	5.89237	6.14262	5.9088	5.00953	5.57017	4.68424	4.66336
sp|Q96P48|ARAP1_HUMAN	ARAP1	ARAP1_HUMAN Arf-GAP with Rho-GAP domain, ANK repeat and PH domain-containing protein 1	22	7.00064	6.74662	7.07512	7.32744	6.72091	6.42145	6.84947	6.60611	7.06293	6.22166	6.89139	6.55576	4.82719	4.99681	4.62439	4.0721
sp|P30305|MPIP2_HUMAN	CDC25B	MPIP2_HUMAN M-phase inducer phosphatase 2	4	6.9328	5.48017	7.03953	7.31721	7.11025	6.36867	7.13075	6.9728	7.23174	6.02905	6.75537	6.08348	5.45289	5.23027	4.9535	3.91151
sp|Q99733|NP1L4_HUMAN	NAP1L4	NP1L4_HUMAN Nucleosome assembly protein 1-like 4	14	5.17448	5.27474	4.99675	5.35378	5.8057	6.04417	5.56696	6.02004	5.93716	6.55923	6.08189	6.76676	7.53719	7.48868	7.90752	7.48493
tr|C9J6D1|C9J6D1_HUMAN	NAP1L4	C9J6D1_HUMAN Nucleosome assembly protein 1-like 4 (Fragment)	1	6.40189	6.62359	7.15777	7.07382	5.14881	4.6276	4.5373	5.46963	6.7867	5.89195	5.71375	6.86248	7.79782	6.71283	6.94332	6.25073
sp|P55209|NP1L1_HUMAN	NAP1L1	NP1L1_HUMAN Nucleosome assembly protein 1-like 1	22	4.75204	5.13111	5.3239	5.1738	5.55909	5.6609	5.16132	5.42077	6.4312	6.91722	5.79474	7.49903	8.38159	6.50211	8.29369	7.99749
tr|B7Z9C2|B7Z9C2_HUMAN	NAP1L1	B7Z9C2_HUMAN Nucleosome assembly protein 1-like 1	2	5.80271	5.22377	5.52124	5.11299	5.76569	5.54661	4.66374	5.82062	7.58182	7.42672	4.73724	6.2334	9.07153	7.97253	6.88723	6.63217
sp|Q86XX4-2|FRAS1_HUMAN	FRAS1	FRAS1_HUMAN Isoform 2 of Extracellular matrix protein FRAS1	20	6.07386	6.36059	6.14085	6.24502	6.32731	6.35075	6.36242	6.23715	6.647	6.33356	6.53616	6.36089	6.21699	6.06395	5.81032	5.93317
sp|Q8N1S5|S39AB_HUMAN	SLC39A11	S39AB_HUMAN Zinc transporter ZIP11	2	6.30915	6.30492	6.19608	6.42684	5.71724	5.83459	6.59631	6.76304	7.29696	6.01386	6.9491	7.39737	5.65608	5.438	5.79289	5.30757
sp|Q9NVC6|MED17_HUMAN	MED17	MED17_HUMAN Mediator of RNA polymerase II transcription subunit 17	16	7.68764	6.30205	7.71541	7.71423	6.86884	6.65142	7.07443	6.61165	6.85678	6.39568	6.9012	6.21488	4.78445	4.78566	3.9567	3.47898
sp|P49006|MRP_HUMAN	MARCKSL1	MRP_HUMAN MARCKS-related protein	14	5.10931	4.41588	4.86057	5.2653	5.57814	5.97245	5.33352	5.57353	5.78054	6.53222	5.72598	6.38066	7.24918	7.86425	8.63967	9.7188
sp|P29966|MARCS_HUMAN	MARCKS	MARCS_HUMAN Myristoylated alanine-rich C-kinase substrate	12	5.03791	5.06182	4.80209	5.04099	5.41184	5.7723	4.95844	5.52094	5.62872	6.34321	5.59854	6.53124	7.74719	7.92673	8.71278	9.90525
sp|Q7KZF4|SND1_HUMAN	SND1	SND1_HUMAN Staphylococcal nuclease domain-containing protein 1	68	6.06888	6.10321	6.04746	5.7963	6.61776	5.95092	6.53011	6.02904	6.96621	6.17148	6.77625	6.19649	7.43858	5.94187	6.43191	4.93354
sp|P11274|BCR_HUMAN	BCR	BCR_HUMAN Breakpoint cluster region protein	13	8.32986	7.26139	8.42972	8.21344	6.876	6.68143	7.59377	7.13961	6.19665	5.79916	6.45379	6.00329	3.92761	4.43931	3.51154	3.14342
sp|Q12979|ABR_HUMAN	ABR	ABR_HUMAN Active breakpoint cluster region-related protein	12	8.57691	8.39876	8.40579	8.50652	6.71989	6.56793	6.99321	6.71908	6.49224	5.89457	6.10752	6.18596	3.77279	4.59216	3.23921	2.82746
sp|Q6UWP2|DHR11_HUMAN	DHRS11	DHR11_HUMAN Dehydrogenase/reductase SDR family member 11	3	6.03699	7.22875	6.47391	6.05612	6.60688	6.34142	6.81076	6.5808	6.74939	6.2049	6.92619	5.88573	6.38845	5.80339	4.62793	5.27839
sp|P28290|SSFA2_HUMAN	SSFA2	SSFA2_HUMAN Sperm-specific antigen 2	47	7.20541	6.74494	7.30743	7.40155	6.51352	6.30962	6.78334	6.55592	6.27162	6.18202	6.57076	6.0724	4.98866	5.56386	4.91584	4.61311
sp|O75528|TADA3_HUMAN	TADA3	TADA3_HUMAN Transcriptional adapter 3	5	7.07801	7.71531	7.95877	7.58011	5.97783	6.4377	6.23342	6.34489	5.47794	5.59835	6.25589	5.79883	5.26043	6.39143	5.12947	4.76162
tr|H7BZ26|H7BZ26_HUMAN	SSFA2	H7BZ26_HUMAN Sperm-specific antigen 2 (Fragment)	1	6.13782	5.47954	7.59167	7.71277	6.40483	4.70061	7.63939	6.638	8.15413	4.83373	7.18105	7.43738	5.05628	4.80178	5.74375	4.48726
sp|Q9NXC5|MIO_HUMAN	MIOS	MIO_HUMAN WD repeat-containing protein mio	11	7.71411	7.03425	7.49455	7.65065	6.74968	6.35118	6.64641	6.72671	6.517	6.31675	6.25008	6.80385	4.84879	4.86311	4.04546	3.98743
sp|P18206|VINC_HUMAN	VCL	VINC_HUMAN Vinculin	164	4.8089	4.88775	4.68679	4.91185	5.31442	6.0244	5.29306	5.76599	5.55446	6.49324	5.77147	6.1765	7.56596	8.09926	8.82969	9.81628
tr|Q5JQ13|Q5JQ13_HUMAN	VCL	Q5JQ13_HUMAN Vinculin (Fragment)	2	4.84037	4.68641	4.91098	4.88204	5.21953	5.07682	4.44932	4.85107	4.76734	5.54524	5.69773	5.68273	8.90528	9.0596	10.0047	11.4208
sp|P19404|NDUV2_HUMAN	NDUFV2	NDUV2_HUMAN NADH dehydrogenase [ubiquinone] flavoprotein 2, mitochondrial	15	5.5108	5.60948	5.40391	6.10339	4.78325	5.58419	4.80258	5.25872	5.03556	6.16269	5.3623	6.02324	6.69941	8.16583	8.65017	10.8445
sp|O43837|IDH3B_HUMAN	IDH3B	IDH3B_HUMAN Isocitrate dehydrogenase [NAD] subunit beta, mitochondrial	28	6.93008	6.56283	6.89217	6.56444	6.96405	6.58123	6.96732	6.46112	6.44586	5.99489	6.45819	5.96094	5.74332	5.4575	5.32968	4.68638
sp|Q9UBF2|COPG2_HUMAN	COPG2	COPG2_HUMAN Coatomer subunit gamma-2	18	8.26063	7.40028	8.10191	8.08067	7.01006	6.68167	7.30849	6.9506	6.49832	6.09616	6.5076	5.88634	4.08688	4.72223	3.44955	2.9586
sp|Q9Y678|COPG1_HUMAN	COPG1	COPG1_HUMAN Coatomer subunit gamma-1	44	8.46073	7.9512	8.18591	8.60087	6.99544	6.84379	7.35079	7.07932	6.34288	6.12562	6.71271	6.18539	3.48787	4.21505	3.00062	2.46183
sp|P54802|ANAG_HUMAN	NAGLU	ANAG_HUMAN Alpha-N-acetylglucosaminidase	12	5.29441	5.06053	5.31197	5.31328	5.5828	6.31032	5.69089	6.16165	5.71945	6.54263	6.22953	6.52708	7.11502	7.20752	7.55347	8.37945
sp|Q96PY5-3|FMNL2_HUMAN	FMNL2	FMNL2_HUMAN Isoform 2 of Formin-like protein 2	3	7.76227	9.4814	8.97572	8.98856	6.12864	6.24479	6.66935	6.11496	5.66913	5.40789	5.88078	5.64625	4.58948	5.09309	3.84774	3.49995
sp|O00330|ODPX_HUMAN	PDHX	ODPX_HUMAN Pyruvate dehydrogenase protein X component, mitochondrial	20	5.292	5.50451	5.13932	5.28603	5.87008	6.02649	5.69394	5.79363	6.27764	6.4873	5.94408	6.32349	7.37668	7.21141	7.62809	8.14532
sp|P13995|MTDC_HUMAN	MTHFD2	MTDC_HUMAN Bifunctional methylenetetrahydrofolate dehydrogenase/cyclohydrolase, mitochondrial	38	6.31057	5.96661	6.28448	6.13512	6.54595	6.05541	6.42897	6.1649	6.82285	6.42361	6.62864	6.12842	6.85941	6.03495	6.19434	5.01577
sp|Q9H903|MTD2L_HUMAN	MTHFD2L	MTD2L_HUMAN Probable bifunctional methylenetetrahydrofolate dehydrogenase/cyclohydrolase 2	2	5.91249	5.68303	6.05807	5.87043	6.48727	6.60759	6.52748	6.6394	7.0394	6.68297	6.55556	6.80328	6.7935	5.75227	5.69996	4.8873
sp|Q96F24|NRBF2_HUMAN	NRBF2	NRBF2_HUMAN Nuclear receptor-binding factor 2	7	6.07302	5.84995	5.98828	5.72687	6.14024	5.98733	5.55942	5.59291	5.9414	5.86142	5.70966	6.08998	6.67924	6.6105	8.04912	8.14067
sp|P17858-2|K6PL_HUMAN	PFKL	K6PL_HUMAN Isoform 2 of 6-phosphofructokinase, liver type	41	5.58559	5.89167	5.39442	5.30488	5.73647	6.04415	5.71894	5.85915	6.15481	6.21628	5.77031	6.00861	7.2043	7.26943	7.54161	8.29938
sp|Q01813|K6PP_HUMAN	PFKP	K6PP_HUMAN 6-phosphofructokinase type C	99	5.38513	5.4665	5.29782	5.22346	5.92131	6.02668	5.63728	5.88206	5.9398	6.19046	5.88582	6.3046	7.10131	7.20267	7.76196	8.77313
sp|P08237-3|K6PF_HUMAN	PFKM	K6PF_HUMAN Isoform 3 of 6-phosphofructokinase, muscle type	72	5.2342	5.35785	5.07293	5.27441	5.60437	5.89111	5.38883	5.78314	5.77024	6.38581	5.5914	6.08295	7.40138	7.70573	8.0739	9.38175
tr|F8VTQ3|F8VTQ3_HUMAN	PFKM	F8VTQ3_HUMAN 6-phosphofructokinase, muscle type (Fragment)	1	5.16033	6.16288	4.67495	5.36317	4.41662	3.97772	4.84749	4.24276	6.68632	7.97717	3.25867	5.41678	9.09948	7.78315	8.6364	12.2961
sp|Q9H7E9-2|CH033_HUMAN	C8orf33	CH033_HUMAN Isoform 2 of UPF0488 protein C8orf33	2	7.79742	6.67371	8.73965	8.4852	5.95726	5.34112	5.74273	5.65933	6.42095	4.90339	6.47701	6.89412	4.98499	6.05579	4.91145	4.95588
sp|O43765|SGTA_HUMAN	SGTA	SGTA_HUMAN Small glutamine-rich tetratricopeptide repeat-containing protein alpha	35	4.9792	4.71092	4.78616	5.00452	5.49772	5.90976	5.28166	5.68672	5.65969	6.32263	5.92839	6.33442	7.52374	7.79827	8.8072	9.769
sp|O95336|6PGL_HUMAN	PGLS	6PGL_HUMAN 6-phosphogluconolactonase	17	4.69176	5.15199	4.94086	5.58469	7.47248	7.95588	7.80007	7.59558	5.29944	7.35714	8.08681	7.37384	7.26389	4.52023	3.56703	5.33831
sp|P55060|XPO2_HUMAN	CSE1L	XPO2_HUMAN Exportin-2	77	7.28167	6.82024	7.28218	7.07023	7.0302	6.75984	7.23503	6.85429	6.85373	6.38666	6.62867	6.36349	4.95632	4.92224	4.07214	3.48307
sp|Q9BUH6|CI142_HUMAN	C9orf142	CI142_HUMAN Uncharacterized protein C9orf142	13	4.97251	5.0201	4.73132	5.19375	5.33904	5.46375	4.88455	5.41902	5.71588	6.04849	5.63399	6.55949	7.90023	8.16779	9.04619	9.90389
sp|Q9P265|DIP2B_HUMAN	DIP2B	DIP2B_HUMAN Disco-interacting protein 2 homolog B	43	6.16515	5.17598	6.40303	6.35107	6.48111	6.4703	6.52796	6.41248	6.61394	6.54328	6.70662	6.5542	6.3141	5.84636	5.90348	5.53095
sp|Q14689|DIP2A_HUMAN	DIP2A	DIP2A_HUMAN Disco-interacting protein 2 homolog A	9	7.33153	6.37463	7.30114	7.59398	6.65745	6.32668	6.72401	6.03778	6.74972	6.40826	6.70041	6.56783	5.51361	5.24676	4.61567	3.85055
sp|Q9Y2E4|DIP2C_HUMAN	DIP2C	DIP2C_HUMAN Disco-interacting protein 2 homolog C	5	6.87333	6.8576	6.97097	6.50638	6.48489	6.26561	6.68545	6.13164	6.76306	6.04144	6.43155	6.38594	6.19904	5.37275	5.52809	4.50226
sp|Q8TDX7|NEK7_HUMAN	NEK7	NEK7_HUMAN Serine/threonine-protein kinase Nek7	8	7.6138	7.53237	7.74836	7.30259	7.37222	6.18953	7.12842	6.63323	7.28596	6.01661	6.72893	5.68397	5.05247	4.8526	4.00033	2.85859
sp|Q9HC98-2|NEK6_HUMAN	NEK6	NEK6_HUMAN Isoform 2 of Serine/threonine-protein kinase Nek6	2	7.8771	8.11287	7.937	7.21209	7.39883	6.58225	7.07757	6.10951	7.28874	6.1633	6.72771	6.32667	4.06111	4.63189	3.35567	3.13768
sp|Q92844|TANK_HUMAN	TANK	TANK_HUMAN TRAF family member-associated NF-kappa-B activator	9	5.83892	4.02203	5.64562	5.659	6.47711	6.28677	6.09594	5.91464	6.4841	6.24463	6.18744	6.30186	7.34098	6.35177	7.38851	7.76068
sp|Q9P2G1|AKIB1_HUMAN	ANKIB1	AKIB1_HUMAN Ankyrin repeat and IBR domain-containing protein 1	1	4.4291	5.51868	5.35599	5.77794	5.39184	5.08143	5.14831	5.58887	5.54421	5.70622	5.381	5.76222	4.86683	5.02031	5.81312	19.6139
sp|Q9HC38-2|GLOD4_HUMAN	GLOD4	GLOD4_HUMAN Isoform 2 of Glyoxalase domain-containing protein 4	54	4.94612	5.38145	4.63701	4.85023	5.51947	5.75863	5.1929	5.62257	5.70095	6.34341	5.43134	6.04451	7.73385	8.04652	8.80426	9.98678
sp|Q99575|POP1_HUMAN	POP1	POP1_HUMAN Ribonucleases P/MRP protein subunit POP1	38	6.25015	6.25031	6.33346	6.40915	5.80304	6.00219	6.02354	6.15937	5.44645	5.80678	6.09584	5.76642	6.25217	6.75976	7.06624	7.57514
sp|Q53H12|AGK_HUMAN	AGK	AGK_HUMAN Acylglycerol kinase, mitochondrial	17	8.08747	8.24794	8.44655	8.80702	6.57564	6.32259	6.92208	6.86083	6.05901	6.20011	6.37503	5.81542	3.78536	5.14551	3.50617	2.84326
sp|Q92616|GCN1L_HUMAN	GCN1L1	GCN1L_HUMAN Translational activator GCN1	156	8.83128	8.02009	8.82885	8.87329	7.00843	6.76098	7.52555	7.13383	6.27169	5.85936	6.3588	5.86752	3.18325	4.31008	2.76917	2.39785
sp|Q9H6L2-2|TM231_HUMAN	TMEM231	TM231_HUMAN Isoform 2 of Transmembrane protein 231	1	4.04345	9.55838	4.36281	5.42596	7.04641	7.70835	5.05301	5.20665	6.71756	7.14916	5.00868	6.04893	5.43124	7.23741	6.60515	7.39684
sp|Q9UNF0|PACN2_HUMAN	PACSIN2	PACN2_HUMAN Protein kinase C and casein kinase substrate in neurons protein 2	34	5.3871	5.74005	5.20693	5.0366	6.32632	5.92562	6.10102	5.91217	6.69773	6.37759	6.28781	6.3135	7.76002	6.66269	7.40298	6.86187
sp|O60749|SNX2_HUMAN	SNX2	SNX2_HUMAN Sorting nexin-2	30	6.60776	6.31332	6.6801	6.27897	6.9863	6.56913	6.75717	6.64222	7.11852	6.65574	6.94913	6.79049	5.90376	5.04349	4.76256	3.94134
tr|B4DEK4|B4DEK4_HUMAN	SNX2	B4DEK4_HUMAN Sorting nexin-2	1	5.24788	5.74969	5.911	5.7997	5.94051	6.62918	6.10821	5.85391	6.74945	6.93286	6.60043	6.07857	6.9751	6.87849	5.82615	6.71886
sp|Q13596|SNX1_HUMAN	SNX1	SNX1_HUMAN Sorting nexin-1	31	6.54302	6.24706	6.42762	6.47553	7.08384	6.70563	6.80921	6.85579	6.93729	6.75495	6.9566	6.4945	5.77337	5.21776	4.83431	3.88353
sp|Q9UBQ7|GRHPR_HUMAN	GRHPR	GRHPR_HUMAN Glyoxylate reductase/hydroxypyruvate reductase	33	5.72821	5.52498	5.81189	5.5715	6.78038	6.30697	6.58323	6.40165	7.14102	6.7286	6.89626	6.46488	7.65436	6.05889	5.81384	4.53333
sp|P29353-6|SHC1_HUMAN	SHC1	SHC1_HUMAN Isoform 6 of SHC-transforming protein 1	20	5.03196	5.22158	5.2913	5.43963	5.67385	6.17639	5.61508	5.71974	5.93211	6.38056	5.72925	6.51322	7.7062	7.1981	7.8683	8.5027
sp|P29353-3|SHC1_HUMAN	SHC1	SHC1_HUMAN Isoform p46Shc of SHC-transforming protein 1	1	4.89652	4.65016	5.28386	4.98908	5.52619	6.93041	6.34658	5.55205	6.41093	7.38231	7.06118	6.66352	7.27739	6.49931	7.15676	7.37373
sp|Q96EV2|RBM33_HUMAN	RBM33	RBM33_HUMAN RNA-binding protein 33	11	5.5746	5.88449	5.89583	5.93971	6.44394	6.39583	6.16569	6.52931	6.288	6.53119	6.32511	6.25105	6.56706	6.56129	6.53985	6.10704
sp|O75061-2|AUXI_HUMAN	DNAJC6	AUXI_HUMAN Isoform 2 of Putative tyrosine-protein phosphatase auxilin	2	6.16213	5.60027	6.04657	5.78353	6.03605	6.13635	6.21163	6.25683	7.00602	6.369	6.72676	5.90835	6.81364	6.32739	5.6311	6.98437
sp|P51452|DUS3_HUMAN	DUSP3	DUS3_HUMAN Dual specificity protein phosphatase 3	11	5.11032	4.0507	4.8052	5.03645	5.88517	5.90127	5.52125	5.60902	5.76202	6.36865	6.09446	6.35032	8.02269	7.80225	8.67837	9.00186
sp|Q9Y277|VDAC3_HUMAN	VDAC3	VDAC3_HUMAN Voltage-dependent anion-selective channel protein 3	32	6.27586	5.7192	6.21227	6.05118	6.47169	6.31862	6.82672	6.68905	6.67412	6.43992	6.45509	6.17535	6.14168	5.98925	5.99075	5.56925
sp|P21796|VDAC1_HUMAN	VDAC1	VDAC1_HUMAN Voltage-dependent anion-selective channel protein 1	109	4.81441	5.08243	4.9439	5.04764	5.45588	5.89132	5.37118	5.7721	5.75675	6.47889	5.83354	6.228	7.6747	7.75309	8.56097	9.33519
sp|Q92979|NEP1_HUMAN	EMG1	NEP1_HUMAN Ribosomal RNA small subunit methyltransferase NEP1	14	6.76665	5.85182	6.97561	7.04038	6.6225	6.44825	6.54127	6.45663	6.3477	6.00469	6.63023	5.9565	6.06753	5.92605	5.58295	4.78127
sp|Q86VP6|CAND1_HUMAN	CAND1	CAND1_HUMAN Cullin-associated NEDD8-dissociated protein 1	84	7.35721	6.6255	7.53614	7.61091	7.03394	6.76855	7.31683	6.92579	6.55547	6.39386	6.82552	6.25967	4.65365	4.93998	3.87156	3.32542
sp|B1AK53|ESPN_HUMAN	ESPN	ESPN_HUMAN Espin	10	5.46156	5.96645	5.47948	5.84088	5.67235	6.31162	5.6307	6.21454	6.15645	6.50169	6.37266	6.40025	6.98401	6.80644	6.91265	7.28828
sp|Q8NFC6|BD1L1_HUMAN	BOD1L1	BD1L1_HUMAN Biorientation of chromosomes in cell division protein 1-like 1	37	5.12642	4.91037	5.21622	5.38237	5.66296	5.81801	5.47031	5.66159	6.03496	6.271	5.74671	6.37849	7.62966	7.51489	8.03815	9.13789
sp|Q96IK1|BOD1_HUMAN	BOD1	BOD1_HUMAN Biorientation of chromosomes in cell division protein 1	6	5.7455	5.78137	5.62679	5.93171	5.90826	6.40336	5.86079	5.93579	6.28989	6.30724	6.14983	6.7172	7.22111	6.73102	5.34394	8.0462
sp|Q92673|SORL_HUMAN	SORL1	SORL_HUMAN Sortilin-related receptor	29	5.81239	6.11853	5.92659	6.11518	5.96104	6.12492	5.93212	5.85515	6.14306	6.37774	6.31262	6.30877	6.80641	6.51595	6.89374	6.79577
sp|P78362-2|SRPK2_HUMAN	SRPK2	SRPK2_HUMAN Isoform 2 of SRSF protein kinase 2	11	6.7727	6.88326	6.99428	7.32473	5.82526	6.13053	6.23026	5.62766	6.04465	5.56683	6.06765	5.9355	5.97565	6.31279	6.44425	5.864
sp|Q96SB4-3|SRPK1_HUMAN	SRPK1	SRPK1_HUMAN Isoform 1 of SRSF protein kinase 1	10	7.64254	8.37212	7.88545	7.79494	6.29392	6.30231	6.94116	6.61391	6.39068	6.02146	6.67904	6.07856	4.53113	5.30462	3.89992	3.24824
sp|O95782|AP2A1_HUMAN	AP2A1	AP2A1_HUMAN AP-2 complex subunit alpha-1	66	6.08465	5.36515	6.2377	6.09153	6.72359	6.70108	6.93763	6.61793	6.75164	6.93807	7.02871	6.50375	6.16081	5.57569	5.52675	4.75533
sp|O94973-2|AP2A2_HUMAN	AP2A2	AP2A2_HUMAN Isoform 2 of AP-2 complex subunit alpha-2	24	5.95399	5.37295	6.12757	6.1756	6.51545	6.05167	6.48519	6.1061	6.70181	6.65593	6.52462	6.48595	6.97149	6.15452	6.091	5.62614
sp|Q15293|RCN1_HUMAN	RCN1	RCN1_HUMAN Reticulocalbin-1	33	5.07223	5.23225	5.04248	5.07262	5.79539	5.78363	5.29417	5.82104	6.07052	6.34633	5.73926	6.55856	7.60787	7.5582	8.16985	8.83559
sp|O15382|BCAT2_HUMAN	BCAT2	BCAT2_HUMAN Branched-chain-amino-acid aminotransferase, mitochondrial	22	5.13062	5.13284	5.07284	5.14073	5.45498	5.84649	5.15269	5.54118	5.84246	6.29561	5.4449	6.33753	7.75863	7.85082	8.37339	9.62428
sp|P30038|AL4A1_HUMAN	ALDH4A1	AL4A1_HUMAN Delta-1-pyrroline-5-carboxylate dehydrogenase, mitochondrial	12	7.83464	8.27697	8.24495	8.1786	6.90787	6.41393	7.35699	6.60418	6.45509	5.9347	6.57354	5.88133	4.18516	4.751	3.39289	3.00817
sp|P67809|YBOX1_HUMAN	YBX1	YBOX1_HUMAN Nuclease-sensitive element-binding protein 1	12	4.86656	5.06904	4.80969	5.22295	5.43276	5.91689	5.30075	5.71661	5.42061	6.30734	5.98736	6.30763	7.82048	7.88101	8.70925	9.23107
sp|P16989|YBOX3_HUMAN	YBX3	YBOX3_HUMAN Y-box-binding protein 3	36	5.07878	5.04989	5.06347	5.39934	5.3874	5.7096	5.34108	5.56965	5.91184	6.18818	5.45968	6.14657	7.87793	7.88377	8.5855	9.34731
sp|P16989-2|YBOX3_HUMAN	YBX3	YBOX3_HUMAN Isoform 2 of Y-box-binding protein 3	4	4.64157	5.21964	5.25051	5.36724	5.00121	5.43785	4.73497	5.2447	5.33285	6.6848	5.29708	5.5885	7.76093	8.97017	9.91598	9.55199
sp|P35251|RFC1_HUMAN	RFC1	RFC1_HUMAN Replication factor C subunit 1	16	10.0886	10.7604	10.2006	10.4598	5.30962	5.02078	5.42214	5.3999	4.46824	4.3102	4.71473	4.48119	3.81871	7.37132	4.11575	4.05793
sp|Q6VMQ6|MCAF1_HUMAN	ATF7IP	MCAF1_HUMAN Activating transcription factor 7-interacting protein 1	25	4.86777	4.49792	5.10738	5.29881	5.63273	6.18322	5.58498	5.89156	5.96095	6.59677	6.22662	6.5184	7.49974	7.46249	8.24049	8.43017
sp|P98196|AT11A_HUMAN	ATP11A	AT11A_HUMAN Probable phospholipid-transporting ATPase IH	6	7.38404	7.53993	7.70996	7.2787	6.52238	6.25496	7.19989	6.60557	6.79168	6.14424	6.52597	5.99015	4.6753	5.10978	4.10977	4.15769
sp|Q9Y2G3|AT11B_HUMAN	ATP11B	AT11B_HUMAN Probable phospholipid-transporting ATPase IF	11	7.81953	7.32818	7.97523	7.60015	6.71253	6.52082	6.99501	6.51967	6.9462	5.77704	6.39847	6.17623	4.72727	5.00306	3.96311	3.53749
sp|Q8NB49|AT11C_HUMAN	ATP11C	AT11C_HUMAN Probable phospholipid-transporting ATPase IG	6	7.83937	6.27108	7.4954	8.31608	6.5221	6.91785	7.19711	7.12106	6.46343	6.1432	7.1768	6.08722	4.19652	4.53973	4.20855	3.5045
sp|Q9Y2T2|AP3M1_HUMAN	AP3M1	AP3M1_HUMAN AP-3 complex subunit mu-1	15	7.81995	8.48842	8.04146	7.74831	6.65043	6.58023	6.95457	6.82599	6.56776	6.0757	6.31705	6.12894	4.11641	4.56636	3.66914	3.44928
sp|P53677|AP3M2_HUMAN	AP3M2	AP3M2_HUMAN AP-3 complex subunit mu-2	12	7.84948	4.23463	7.90743	8.65827	7.08158	6.83107	7.07572	7.1814	6.52427	6.01699	6.45948	6.45318	4.46721	5.1406	4.14285	3.97583
sp|Q969T9|WBP2_HUMAN	WBP2	WBP2_HUMAN WW domain-binding protein 2	19	4.69456	3.18429	4.80135	5.26828	5.74328	6.58721	5.81779	6.5545	5.11153	6.17869	6.5566	6.45493	7.21134	7.70714	8.60308	9.52541
sp|O75569|PRKRA_HUMAN	PRKRA	PRKRA_HUMAN Interferon-inducible double-stranded RNA-dependent protein kinase activator A	14	6.97061	7.06984	6.85004	7.13581	6.15838	5.83875	6.31393	5.82994	6.06097	5.92969	6.51554	5.93744	5.99517	5.91681	6.1271	5.34997
sp|Q8N163|CCAR2_HUMAN	CCAR2	CCAR2_HUMAN Cell cycle and apoptosis regulator protein 2	60	6.2247	6.06465	6.46386	6.38636	6.68585	6.689	6.90017	6.70085	6.85479	6.82607	7.00346	6.64832	5.99886	5.45058	4.98485	4.11764
sp|Q8IZ83|A16A1_HUMAN	ALDH16A1	A16A1_HUMAN Aldehyde dehydrogenase family 16 member A1	31	4.96941	5.58609	4.90354	5.10241	5.60783	6.12734	5.62104	5.70302	5.95541	6.20779	5.95797	6.53081	7.19417	7.25536	8.29463	8.98319
sp|Q12929|EPS8_HUMAN	EPS8	EPS8_HUMAN Epidermal growth factor receptor kinase substrate 8	29	6.40053	5.8973	6.10688	5.92603	6.45969	6.26685	6.44127	5.90275	6.61293	6.17808	6.80186	6.14514	7.20604	5.49943	6.94586	5.20936
sp|Q14554|PDIA5_HUMAN	PDIA5	PDIA5_HUMAN Protein disulfide-isomerase A5	22	6.19182	5.38515	5.89368	6.02954	6.31289	6.16775	6.12563	6.099	6.02444	5.84602	6.18721	6.21691	6.56516	6.33163	7.7208	6.90238
sp|Q2NKX8|ERC6L_HUMAN	ERCC6L	ERC6L_HUMAN DNA excision repair protein ERCC-6-like	35	7.46034	7.60869	7.5655	7.51676	6.74267	6.51289	7.0006	6.75469	6.4355	6.06559	6.5263	6.02543	4.74209	4.98011	4.18257	3.88025
sp|O00512|BCL9_HUMAN	BCL9	BCL9_HUMAN B-cell CLL/lymphoma 9 protein	16	5.08859	5.45397	5.14329	5.44712	5.76376	6.0279	5.47509	5.86053	5.84759	6.45492	5.98254	6.37439	7.16186	7.3095	7.59128	9.01767
sp|Q08211|DHX9_HUMAN	DHX9	DHX9_HUMAN ATP-dependent RNA helicase A	79	7.66945	7.00431	7.69827	7.6406	6.62225	6.25282	6.99022	6.4269	6.12978	5.75719	6.46231	5.75243	5.11766	5.69061	4.76178	4.02341
sp|Q92817|EVPL_HUMAN	EVPL	EVPL_HUMAN Envoplakin	26	6.37863	6.88899	6.62403	6.19368	6.16423	6.64272	6.20784	6.42143	6.12649	5.90591	6.14821	6.24865	5.95926	5.70033	6.45795	5.93166
sp|P06454-2|PTMA_HUMAN	PTMA	PTMA_HUMAN Isoform 2 of Prothymosin alpha	8	4.40085	4.97406	4.80354	5.01139	5.1694	5.6349	5.20713	5.42169	5.42885	6.24727	5.60788	6.43298	7.78666	8.26092	9.30931	10.3032
sp|Q9Y2A7-2|NCKP1_HUMAN	NCKAP1	NCKP1_HUMAN Isoform 2 of Nck-associated protein 1	48	6.64938	6.64591	6.66	6.60353	6.82839	6.70907	6.8441	6.7861	7.02108	6.87242	6.97338	6.41956	5.74016	5.09335	4.53238	3.6212
sp|Q9NW82|WDR70_HUMAN	WDR70	WDR70_HUMAN WD repeat-containing protein 70	23	5.89409	5.17292	5.83028	5.72106	6.48259	6.29066	6.19834	6.21057	6.58343	6.34817	6.40313	6.33089	6.88084	6.23283	7.02522	6.39498
sp|P20962|PTMS_HUMAN	PTMS	PTMS_HUMAN Parathymosin	53	4.80013	5.24735	4.85215	4.8826	5.4117	6.13507	5.37895	5.87538	5.78707	6.67914	5.96932	6.47805	7.14415	7.65258	8.37585	9.33052
sp|Q13356|PPIL2_HUMAN	PPIL2	PPIL2_HUMAN Peptidyl-prolyl cis-trans isomerase-like 2	17	6.63226	6.25921	6.80142	6.5927	6.8621	6.63906	6.9592	6.54746	6.74329	6.41315	7.03265	6.56491	5.53204	5.29537	4.96181	4.16337
tr|E7EW80|E7EW80_HUMAN	PPIL2	E7EW80_HUMAN Peptidyl-prolyl cis-trans isomerase-like 2	1	2.92149	3.85937	2.71871	3.37181	5.49556	6.44134	8.61104	5.46959	7.60996	7.12969	6.24099	5.57914	12.4023	8.18489	8.53427	5.42983
sp|Q9NPJ8-3|NXT2_HUMAN	NXT2	NXT2_HUMAN Isoform 3 of NTF2-related export protein 2	1	6.15591	6.8147	6.06364	5.80566	5.89329	6.62115	6.51136	7.06851	7.20881	7.38215	5.83793	5.62201	6.00684	6.9954	4.82574	5.18691
sp|Q05655-2|KPCD_HUMAN	PRKCD	KPCD_HUMAN Isoform 2 of Protein kinase C delta type	24	5.65488	5.52124	5.80959	5.67983	6.40605	6.20072	6.25867	6.07508	6.76526	6.66595	6.51567	6.3344	7.61081	6.33006	6.52216	5.64962
sp|Q02156|KPCE_HUMAN	PRKCE	KPCE_HUMAN Protein kinase C epsilon type	11	5.5241	5.69786	5.54801	5.30898	6.11424	6.20391	6.17423	6.00622	6.83488	6.71729	6.56596	6.67655	7.07791	6.40822	6.82176	6.31988
sp|P24723|KPCL_HUMAN	PRKCH	KPCL_HUMAN Protein kinase C eta type	5	5.91386	6.8354	5.67173	5.52966	6.73013	6.06565	6.35694	6.05765	6.64412	6.38326	6.74868	6.31084	6.33979	6.05027	6.38587	5.97615
sp|P17252|KPCA_HUMAN	PRKCA	KPCA_HUMAN Protein kinase C alpha type	4	6.77248	6.7063	7.46338	7.24673	7.84533	7.40517	8.0527	7.24899	7.83631	6.41958	7.81485	6.39231	3.51344	4.12875	3.02636	2.12733
sp|Q9UHB6-4|LIMA1_HUMAN	LIMA1	LIMA1_HUMAN Isoform 4 of LIM domain and actin-binding protein 1	29	5.5626	5.78721	5.55064	5.66593	6.12543	6.19125	5.90563	5.91187	5.88321	6.01882	6.10877	6.35729	6.46737	7.0524	7.42311	7.98847
sp|P78314-3|3BP2_HUMAN	SH3BP2	3BP2_HUMAN Isoform 3 of SH3 domain-binding protein 2	2	5.50544	4.96636	5.97307	5.92307	5.99891	5.67139	5.73725	7.09531	6.65001	6.19135	6.65695	6.46654	7.30362	7.23044	6.2184	6.41188
sp|Q9NX63|CHCH3_HUMAN	CHCHD3	CHCH3_HUMAN Coiled-coil-helix-coiled-coil-helix domain-containing protein 3, mitochondrial	10	8.64117	9.02269	8.81117	8.34852	6.87439	6.51744	7.44314	7.22486	6.64005	5.66412	6.29892	5.82892	3.35904	4.24373	2.75807	2.32377
sp|Q9P253|VPS18_HUMAN	VPS18	VPS18_HUMAN Vacuolar protein sorting-associated protein 18 homolog	18	8.61634	8.92925	8.56956	8.58096	6.92478	6.56467	7.16996	6.94791	6.16562	5.79477	5.96131	5.85388	3.34613	4.69893	3.0153	2.86063
sp|Q9NW13|RBM28_HUMAN	RBM28	RBM28_HUMAN RNA-binding protein 28	16	11.9208	13.0833	11.7588	12.4203	5.36758	5.12387	5.99336	5.54799	4.21958	3.53526	4.02074	3.8886	2.75389	5.80152	2.48333	2.08105
sp|P46531|NOTC1_HUMAN	NOTCH1	NOTC1_HUMAN Neurogenic locus notch homolog protein 1	15	6.33222	7.13725	6.52609	6.39928	6.46806	6.06929	6.58073	6.20873	6.54992	6.38759	6.42134	6.35225	5.93259	5.71268	5.52439	5.3976
sp|Q04721|NOTC2_HUMAN	NOTCH2	NOTC2_HUMAN Neurogenic locus notch homolog protein 2	22	5.80355	6.18503	5.94321	6.08114	5.96048	6.07408	5.95535	6.02919	6.10776	6.65444	6.37016	6.40163	6.67726	6.49471	6.67095	6.59108
sp|Q9UM47|NOTC3_HUMAN	NOTCH3	NOTC3_HUMAN Neurogenic locus notch homolog protein 3	7	6.21482	7.95673	6.34964	6.39865	5.88743	5.89339	5.72007	5.64656	6.52865	6.28581	6.00454	6.39862	6.49083	6.07633	5.96804	6.17987
sp|P49917|DNLI4_HUMAN	LIG4	DNLI4_HUMAN DNA ligase 4	12	7.36937	7.25212	7.60281	6.93932	7.08849	6.58493	7.42929	6.75465	6.87803	6.62049	7.02681	6.47618	4.40211	4.46422	3.7892	3.32197
sp|Q9UHV9|PFD2_HUMAN	PFDN2	PFD2_HUMAN Prefoldin subunit 2	17	5.21106	5.67478	5.04198	5.2007	5.67308	5.85991	5.29702	5.64875	5.86184	6.32749	5.59529	6.41341	7.26423	7.41752	8.30833	9.20461
sp|O94906|PRP6_HUMAN	PRPF6	PRP6_HUMAN Pre-mRNA-processing factor 6	30	10.3534	9.10703	10.3471	10.3268	6.277	6.49312	6.92714	6.65178	4.90254	4.88341	5.44633	5.01227	2.64947	5.27172	2.71288	2.63809
sp|Q9NR33|DPOE4_HUMAN	POLE4	DPOE4_HUMAN DNA polymerase epsilon subunit 4	7	5.32007	5.89576	5.41838	5.5551	5.66691	6.15312	5.48825	6.13448	5.55279	6.47471	5.97969	6.71444	7.23488	7.24225	6.25653	8.91264
sp|P35232|PHB_HUMAN	PHB	PHB_HUMAN Prohibitin	54	6.45987	6.35562	6.25819	6.39933	6.88953	6.49183	6.57372	6.54881	7.08197	6.81712	6.58704	6.67295	6.49967	5.50896	4.62493	4.23046
sp|P05023|AT1A1_HUMAN	ATP1A1	AT1A1_HUMAN Sodium/potassium-transporting ATPase subunit alpha-1	50	6.59181	6.62705	6.54662	6.48436	6.68349	6.64841	7.07325	6.55371	6.71245	6.67307	6.95176	6.28655	5.61008	5.30512	4.92333	4.32894
sp|P13637-3|AT1A3_HUMAN	ATP1A3	AT1A3_HUMAN Isoform 3 of Sodium/potassium-transporting ATPase subunit alpha-3	41	6.5881	6.66655	6.6833	6.81262	6.544	6.19276	6.52857	6.44614	6.66767	6.54011	6.50394	6.25286	6.00595	5.77535	5.27917	4.51288
sp|Q5JVF3|PCID2_HUMAN	PCID2	PCID2_HUMAN PCI domain-containing protein 2	18	8.01213	7.22585	8.45411	8.7986	6.97888	6.75444	7.66745	6.91912	5.90407	5.76188	6.93744	5.84323	3.73556	4.61772	3.34981	3.03971
sp|O75717|WDHD1_HUMAN	WDHD1	WDHD1_HUMAN WD repeat and HMG-box DNA-binding protein 1	43	7.94938	7.74011	8.08187	8.14108	7.13947	6.95386	7.30238	6.91028	6.36432	5.90535	6.72603	6.11072	3.80474	4.45633	3.49638	2.91771
sp|Q96I15|SCLY_HUMAN	SCLY	SCLY_HUMAN Selenocysteine lyase	16	4.82812	5.11635	5.10909	5.14322	5.42667	5.88307	5.53228	5.79155	5.90996	6.34846	6.04668	6.37781	7.39284	8.09478	8.11635	8.88277
sp|Q08379|GOGA2_HUMAN	GOLGA2	GOGA2_HUMAN Golgin subfamily A member 2	18	7.1369	6.90911	7.23758	7.08199	6.63662	6.22265	6.5393	6.04339	6.42119	5.81155	6.33963	6.02303	5.67703	5.34421	5.71894	4.85688
sp|Q15583|TGIF1_HUMAN	TGIF1	TGIF1_HUMAN Homeobox protein TGIF1	8	6.07098	6.47887	5.78878	5.7273	6.15301	5.92019	5.98937	5.83778	6.46603	6.11518	6.22379	6.54777	6.88146	6.39346	6.90565	6.50039
sp|P78318|IGBP1_HUMAN	IGBP1	IGBP1_HUMAN Immunoglobulin-binding protein 1	14	5.09968	5.29223	4.95935	4.98167	5.66946	6.14817	5.34291	5.67469	5.73025	6.74341	5.76764	6.17434	7.3486	7.52474	8.35057	9.19228
sp|P33176|KINH_HUMAN	KIF5B	KINH_HUMAN Kinesin-1 heavy chain	75	5.45279	4.98296	5.63789	5.34714	6.75097	6.56271	6.96965	6.62338	7.1381	6.86605	7.30263	6.58836	7.54878	5.75847	6.08078	4.38934
sp|O60282|KIF5C_HUMAN	KIF5C	KIF5C_HUMAN Kinesin heavy chain isoform 5C	4	5.91108	6.44213	6.21899	6.60079	6.34342	5.41265	6.4709	6.082	6.94813	6.27444	6.7414	7.0118	7.44129	5.3478	5.49129	5.26191
sp|Q12840|KIF5A_HUMAN	KIF5A	KIF5A_HUMAN Kinesin heavy chain isoform 5A	12	5.81319	5.70351	5.94054	5.68181	7.14392	6.28032	6.63304	6.40121	7.15447	6.48054	6.45794	6.49567	7.14275	5.91005	6.16462	4.59639
sp|Q6ZVM7|TM1L2_HUMAN	TOM1L2	TM1L2_HUMAN TOM1-like protein 2	9	5.36016	5.23702	4.96603	5.07545	5.38477	5.62499	5.41361	5.36507	5.79615	6.27314	5.7909	6.31129	7.74378	7.62035	9.02946	9.00782
sp|Q96CW6|S7A6O_HUMAN	SLC7A6OS	S7A6O_HUMAN Probable RNA polymerase II nuclear localization protein SLC7A6OS	5	4.83255	5.57898	4.98773	4.91954	5.65984	6.13964	5.34461	5.6573	5.8846	6.39496	5.62702	6.3353	7.46701	7.71276	8.07434	9.38381
sp|O60524|NEMF_HUMAN	NEMF	NEMF_HUMAN Nuclear export mediator factor NEMF	31	7.36704	7.24143	7.21144	7.056	6.62015	6.37613	6.79171	6.27748	6.47351	5.7426	6.27686	5.69141	5.34565	5.29975	5.45111	4.77773
sp|Q8IXQ3|CI040_HUMAN	C9orf40	CI040_HUMAN Uncharacterized protein C9orf40	4	5.38403	5.89746	5.44986	5.55386	5.66102	5.70038	5.82658	5.64057	6.18528	6.78615	6.2903	6.97203	6.59533	6.71108	7.53394	7.81214
sp|Q00610|CLH1_HUMAN	CLTC	CLH1_HUMAN Clathrin heavy chain 1	198	6.15299	5.5746	6.1912	6.1106	6.85426	6.51977	6.82009	6.64153	7.12084	6.85469	7.09695	6.74354	6.54338	5.51116	5.19478	4.06963
sp|P51957|NEK4_HUMAN	NEK4	NEK4_HUMAN Serine/threonine-protein kinase Nek4	4	7.19029	5.45663	8.10579	7.68655	5.93612	7.43873	7.02157	7.22154	5.97543	6.31798	6.89584	5.60214	4.90121	5.60698	4.51108	4.1321
sp|P49327|FAS_HUMAN	FASN	FAS_HUMAN Fatty acid synthase	374	7.28695	6.78605	7.32775	7.01103	7.32595	6.97797	7.65728	7.18153	7.06887	6.53495	7.19755	6.33291	4.52906	4.33082	3.59723	2.85411
sp|P28340|DPOD1_HUMAN	POLD1	DPOD1_HUMAN DNA polymerase delta catalytic subunit	36	7.85861	6.79999	8.04676	8.21381	7.0661	6.57568	7.07887	6.63233	5.97085	5.54625	6.63548	5.66673	4.51064	5.08065	4.32514	3.99212
sp|O76021|RL1D1_HUMAN	RSL1D1	RL1D1_HUMAN Ribosomal L1 domain-containing protein 1	19	10.015	8.05877	9.80848	10.463	6.1649	5.76046	6.63107	6.11588	5.14696	4.62313	5.51736	4.9321	3.80507	5.79366	3.82343	3.34082
sp|Q96RU3|FNBP1_HUMAN	FNBP1	FNBP1_HUMAN Formin-binding protein 1	17	5.31111	5.59557	5.73902	5.55739	6.12491	6.47566	6.4915	6.36406	6.60431	7.14207	7.21929	6.31329	6.97359	6.35771	6.6498	5.08073
sp|P35606|COPB2_HUMAN	COPB2	COPB2_HUMAN Coatomer subunit beta'	59	7.4602	7.40892	7.47092	7.41735	6.61484	6.64499	7.0128	6.70566	6.5	6.44213	6.66762	6.47324	4.71474	4.8063	4.08912	3.57118
sp|P53985|MOT1_HUMAN	SLC16A1	MOT1_HUMAN Monocarboxylate transporter 1	11	8.49122	8.83728	8.36954	7.99748	6.68663	5.76172	6.28092	5.87652	7.04181	5.99776	5.79655	5.99532	4.49128	5.02783	3.97475	3.3734
sp|Q709C8|VP13C_HUMAN	VPS13C	VP13C_HUMAN Vacuolar protein sorting-associated protein 13C	55	7.51321	7.31131	7.62274	7.61044	6.62418	6.43681	6.79208	6.55598	6.58638	6.18281	6.52272	6.16305	4.69851	4.98055	4.38849	4.01074
sp|Q9NP74|PALMD_HUMAN	PALMD	PALMD_HUMAN Palmdelphin	1	4.3947	27.7995	4.43493	2.3686	3.3207	3.41441	2.63871	3.29024	5.86036	3.81172	2.69547	5.13075	8.47522	6.52227	7.36059	8.48177
sp|Q9P032|NDUF4_HUMAN	NDUFAF4	NDUF4_HUMAN NADH dehydrogenase [ubiquinone] 1 alpha subcomplex assembly factor 4	16	6.86981	7.03376	6.69338	6.58937	6.78713	6.49774	6.74195	6.61143	6.50327	6.30489	6.50657	6.23274	5.4647	5.40414	5.16447	4.59466
sp|Q9NZN8|CNOT2_HUMAN	CNOT2	CNOT2_HUMAN CCR4-NOT transcription complex subunit 2	16	7.49367	7.8704	7.41378	7.28687	6.92728	6.52058	6.69662	6.60873	6.30286	5.91542	6.41554	6.11159	4.83975	5.14714	4.37556	4.0742
sp|Q5HYK3|COQ5_HUMAN	COQ5	COQ5_HUMAN 2-methoxy-6-polyprenyl-1,4-benzoquinol methylase, mitochondrial	9	7.50174	8.13468	7.906	8.01295	6.46452	6.33356	6.90261	6.60148	6.16212	6.00087	6.75882	6.05968	4.3612	5.05549	3.87021	3.87406
sp|Q9GZS1-2|RPA49_HUMAN	POLR1E	RPA49_HUMAN Isoform 2 of DNA-directed RNA polymerase I subunit RPA49	7	10.9782	11.4729	10.3434	10.5153	6.27934	5.59693	7.06578	6.29624	5.34957	4.51997	5.16678	4.67678	2.43187	5.1702	2.27977	1.85691
sp|P56192|SYMC_HUMAN	MARS	SYMC_HUMAN Methionine--tRNA ligase, cytoplasmic	57	8.58466	8.64236	8.70162	8.66232	6.95492	6.59248	7.29624	6.84057	6.27768	5.81173	6.39604	5.82824	3.54849	4.44292	2.92865	2.49108
sp|Q8N3D4|EH1L1_HUMAN	EHBP1L1	EH1L1_HUMAN EH domain-binding protein 1-like protein 1	24	6.8902	6.68919	7.10976	6.79995	6.65376	6.63491	6.95101	6.65176	6.56334	6.31815	6.61477	6.54954	5.21458	5.21698	4.76928	4.37283
sp|Q8NDI1-2|EHBP1_HUMAN	EHBP1	EHBP1_HUMAN Isoform 2 of EH domain-binding protein 1	11	7.3973	7.7251	7.37773	7.62458	6.51653	5.88053	6.41147	6.31511	6.08915	6.07962	6.04359	5.95828	5.1094	5.71804	4.89453	4.85904
sp|Q9UDT6|CLIP2_HUMAN	CLIP2	CLIP2_HUMAN CAP-Gly domain-containing linker protein 2	29	5.72793	8.67127	5.62496	5.06136	5.8809	5.71577	5.85204	5.31104	6.21465	5.66293	5.81048	5.8179	7.12523	6.14323	8.10279	7.27753
sp|P30622|CLIP1_HUMAN	CLIP1	CLIP1_HUMAN CAP-Gly domain-containing linker protein 1	80	4.91197	5.29166	4.84601	5.19891	5.32672	5.81852	5.18427	5.63238	5.76267	6.41646	5.57877	6.35588	7.61203	7.89756	8.54919	9.61703
sp|P52272|HNRPM_HUMAN	HNRNPM	HNRPM_HUMAN Heterogeneous nuclear ribonucleoprotein M	91	8.14654	8.34575	8.05075	8.23406	6.37689	6.25114	6.58441	6.45807	6.05632	5.72312	6.25959	6.13325	4.4029	5.18143	4.12297	3.67281
sp|Q8IXK2|GLT12_HUMAN	GALNT12	GLT12_HUMAN Polypeptide N-acetylgalactosaminyltransferase 12	9	7.56035	7.99863	7.68324	7.03078	6.6877	6.26138	7.02677	6.5181	6.641	6.06461	6.81012	6.2829	4.70798	4.8788	4.10857	3.73906
sp|Q8N4A0|GALT4_HUMAN	GALNT4	GALT4_HUMAN Polypeptide N-acetylgalactosaminyltransferase 4	6	6.20192	6.85259	6.42644	6.37153	6.76571	6.25263	6.20574	6.36074	6.79539	6.61802	6.65688	6.76223	6.02692	5.84596	5.17998	4.67732
sp|Q10471|GALT2_HUMAN	GALNT2	GALT2_HUMAN Polypeptide N-acetylgalactosaminyltransferase 2	31	5.97134	6.19008	5.93549	5.72667	6.47508	6.15677	6.25285	6.19561	6.72958	6.65928	6.42702	6.45047	7.01416	6.08202	6.28367	5.44991
sp|Q9NVZ3|NECP2_HUMAN	NECAP2	NECP2_HUMAN Adaptin ear-binding coat-associated protein 2	16	4.58194	5.30337	4.67462	5.03846	5.22372	6.30426	5.59121	6.10467	5.29345	6.57398	5.93304	6.57817	7.20691	7.67074	8.19112	9.73035
sp|P15882|CHIN_HUMAN	CHN1	CHIN_HUMAN N-chimaerin	1	8.55363	9.23268	7.98884	7.50248	6.85584	6.84064	7.35418	6.6449	6.98252	5.80795	6.06654	5.81081	3.74818	4.5162	3.10251	2.99209
sp|Q9NUQ6|SPS2L_HUMAN	SPATS2L	SPS2L_HUMAN SPATS2-like protein	8	9.58188	7.93362	9.40605	10.5734	6.00759	5.45289	6.22778	5.92545	4.99648	4.58174	4.90047	4.7761	4.17492	6.61963	4.64179	4.20024
sp|O60306|AQR_HUMAN	AQR	AQR_HUMAN Intron-binding protein aquarius	31	7.59618	7.6565	7.88467	7.79853	6.73769	6.45241	6.91174	6.46819	6.36904	6.05841	6.62227	5.95491	4.61424	4.95183	4.08859	3.83479
sp|P27708|PYR1_HUMAN	CAD	PYR1_HUMAN CAD protein	133	7.31191	6.8476	7.33204	7.32187	7.069	6.82662	7.3655	6.93891	6.85652	6.33923	7.04492	6.27955	4.72687	4.56693	3.955	3.21753
sp|P31327-3|CPSM_HUMAN	CPS1	CPSM_HUMAN Isoform 3 of Carbamoyl-phosphate synthase [ammonia], mitochondrial	41	5.80078	6.07373	5.99823	5.83002	6.46116	6.18753	6.38808	6.41388	6.63913	6.3753	6.55482	6.59739	6.53399	5.79856	5.90699	6.44041
sp|Q63HN8-4|RN213_HUMAN	RNF213	RN213_HUMAN Isoform 2 of E3 ubiquitin-protein ligase RNF213	30	9.23677	9.93463	9.47396	9.2865	6.38484	6.05181	6.61782	6.2355	5.81527	5.18374	5.58644	5.19969	3.60019	5.04115	3.25563	3.09604
sp|P31483|TIA1_HUMAN	TIA1	TIA1_HUMAN Nucleolysin TIA-1 isoform p40	9	5.12145	4.42442	5.1056	5.438	5.2356	5.61139	5.47617	5.22941	5.82844	6.00669	6.12408	6.5047	7.8584	7.50121	8.69815	9.83628
sp|Q01085-2|TIAR_HUMAN	TIAL1	TIAR_HUMAN Isoform 2 of Nucleolysin TIAR	16	5.37822	4.70195	5.04041	5.23118	5.69569	6.06423	5.32777	5.7259	5.70983	6.30101	5.89653	6.13964	7.4729	7.33082	8.64787	9.33605
sp|Q01085|TIAR_HUMAN	TIAL1	TIAR_HUMAN Nucleolysin TIAR	1	5.44004	7.80998	6.12275	5.32329	7.55213	6.81249	6.39371	5.99304	7.58802	5.74727	5.24508	6.45144	5.98809	4.69755	5.40341	7.43171
sp|P62258|1433E_HUMAN	YWHAE	1433E_HUMAN 14-3-3 protein epsilon	283	4.96055	5.40752	4.85549	5.04875	5.4791	5.85592	5.17862	5.67519	5.62228	6.3411	5.56816	6.28888	7.56609	7.83991	8.64908	9.66335
sp|P63104|1433Z_HUMAN	YWHAZ	1433Z_HUMAN 14-3-3 protein zeta/delta	184	4.68641	5.03854	4.65705	4.83457	5.45383	6.57427	5.99817	6.28107	5.50756	6.29024	6.32479	6.56906	7.24254	7.0393	8.0862	9.41642
tr|E7EX29|E7EX29_HUMAN	YWHAZ	E7EX29_HUMAN 14-3-3 protein zeta/delta (Fragment)	1	4.5827	4.54045	3.54915	4.05681	6.03976	7.05899	4.87014	7.46357	7.16959	6.4572	6.84758	6.25229	7.17213	7.54601	7.6157	8.77793
sp|P61981|1433G_HUMAN	YWHAG	1433G_HUMAN 14-3-3 protein gamma	34	4.53333	4.73184	4.33418	4.69167	5.22047	6.21215	5.44522	5.9334	5.34245	6.41522	5.74777	6.4324	7.81102	7.72324	9.08605	10.3396
sp|Q04917|1433F_HUMAN	YWHAH	1433F_HUMAN 14-3-3 protein eta	32	5.00265	4.89077	5.08855	4.99808	6.11463	6.33261	6.52667	6.51939	6.41674	6.93321	6.63182	6.4	7.80238	6.59533	7.28463	6.46253
sp|P27348|1433T_HUMAN	YWHAQ	1433T_HUMAN 14-3-3 protein theta	50	4.68392	4.87992	4.81989	4.8442	5.68068	6.66449	6.24962	6.4488	5.91342	7.04989	6.92975	7.06814	7.08301	6.37018	7.39363	7.92047
sp|P31946|1433B_HUMAN	YWHAB	1433B_HUMAN 14-3-3 protein beta/alpha	36	4.64331	5.40391	4.69988	4.83642	5.34608	5.61705	4.96912	5.60486	5.93066	6.43525	5.29972	7.15294	7.66238	7.43226	8.51341	10.4528
sp|P31947|1433S_HUMAN	SFN	1433S_HUMAN 14-3-3 protein sigma	76	5.06363	5.34017	4.98389	5.02199	5.62052	5.90013	5.40179	5.65272	5.98641	6.35244	5.81786	6.40484	7.69261	7.38935	8.16765	9.20403
sp|Q6UWE0|LRSM1_HUMAN	LRSAM1	LRSM1_HUMAN E3 ubiquitin-protein ligase LRSAM1	19	5.76716	4.24939	5.94095	6.01048	6.78247	6.5213	6.77843	6.90277	6.47731	6.88851	6.90427	6.72148	6.30194	6.28969	5.98098	5.48286
tr|F5H1X8|F5H1X8_HUMAN	LRBA	F5H1X8_HUMAN Lipopolysaccharide-responsive and beige-like anchor protein	88	7.15632	7.24722	7.21708	6.94388	6.92378	6.67447	7.05954	6.85559	7.025	6.46999	6.81662	6.46104	5.02143	4.63626	4.0511	3.44067
sp|Q8NFP9|NBEA_HUMAN	NBEA	NBEA_HUMAN Neurobeachin	8	7.03418	6.93073	7.05793	7.33863	6.93563	6.45979	6.63089	6.65369	6.99267	6.31187	6.74558	6.72163	5.12306	5.08436	4.39547	3.58388
sp|P50416|CPT1A_HUMAN	CPT1A	CPT1A_HUMAN Carnitine O-palmitoyltransferase 1, liver isoform	29	8.49986	8.38922	8.37398	8.27315	6.89548	7.10813	7.52313	7.12364	6.08856	5.82823	7.00949	5.65025	3.52259	4.18498	2.94465	2.58466
sp|O00273|DFFA_HUMAN	DFFA	DFFA_HUMAN DNA fragmentation factor subunit alpha	19	4.8345	4.1568	4.76523	5.01662	5.75885	6.14211	5.64649	5.91876	5.77344	6.58861	5.92453	6.45511	7.21667	7.5881	8.6084	9.60576
sp|O00273-2|DFFA_HUMAN	DFFA	DFFA_HUMAN Isoform DFF35 of DNA fragmentation factor subunit alpha	1	5.85975	3.70508	6.57467	6.42183	5.51934	6.84136	7.43434	7.02754	7.51515	7.29471	6.78796	5.55652	5.11199	6.98869	5.95368	5.40738
sp|P31040|DHSA_HUMAN	SDHA	DHSA_HUMAN Succinate dehydrogenase [ubiquinone] flavoprotein subunit, mitochondrial	60	4.94022	4.85009	5.06336	5.05912	5.77266	6.1065	5.76223	5.95007	6.04743	6.52934	6.24334	6.41338	7.74829	7.45791	8.11982	7.93624
sp|Q08380|LG3BP_HUMAN	LGALS3BP	LG3BP_HUMAN Galectin-3-binding protein	21	5.56483	5.32157	5.38617	5.59904	5.79954	6.29408	5.92486	6.12886	5.95657	6.5871	6.04859	6.52014	6.70768	6.89556	7.26038	8.00502
sp|Q9UID3|VPS51_HUMAN	VPS51	VPS51_HUMAN Vacuolar protein sorting-associated protein 51 homolog	15	8.3414	8.41922	8.71606	8.66636	6.66016	6.39767	7.16665	6.86973	6.44434	5.70493	6.36281	5.83869	3.60284	4.63178	3.24441	2.93294
sp|Q5T5Y3-3|CAMP1_HUMAN	CAMSAP1	CAMP1_HUMAN Isoform 3 of Calmodulin-regulated spectrin-associated protein 1	10	8.09669	7.25701	8.37997	8.4613	6.68447	6.63813	7.14966	6.7724	6.00066	5.48434	6.13903	5.70683	3.94776	5.05624	4.25924	3.96626
sp|Q5JTZ9|SYAM_HUMAN	AARS2	SYAM_HUMAN Alanine--tRNA ligase, mitochondrial	16	8.4257	8.54328	8.30479	8.10522	6.7485	6.31629	7.12773	6.7704	6.55881	5.7688	6.40144	6.10292	4.0643	4.43974	3.45858	2.86351
sp|Q8WUM0|NU133_HUMAN	NUP133	NU133_HUMAN Nuclear pore complex protein Nup133	33	8.5222	8.77685	8.76038	8.57711	6.90661	6.77604	7.48481	7.05528	6.20278	5.86446	6.58094	5.74789	3.41265	4.23188	2.75648	2.34364
sp|P04406|G3P_HUMAN	GAPDH	G3P_HUMAN Glyceraldehyde-3-phosphate dehydrogenase	552	4.93717	4.61775	4.85475	5.07455	5.64858	6.12596	5.43314	5.94605	5.72914	6.50616	6.05035	6.76599	7.13104	7.32622	8.36597	9.48717
sp|P04406-2|G3P_HUMAN	GAPDH	G3P_HUMAN Isoform 2 of Glyceraldehyde-3-phosphate dehydrogenase	1	4.86504	3.62431	4.39969	5.11514	5.31518	4.87484	5.39136	5.899	6.90133	6.31991	5.20502	5.68239	7.56013	9.19151	9.33635	10.3188
sp|P10636|TAU_HUMAN	MAPT	TAU_HUMAN Microtubule-associated protein tau	22	4.79318	5.15909	4.80044	5.23816	5.21421	5.78916	5.0739	5.36598	5.69449	6.27617	5.72343	6.51316	7.67667	7.7811	8.66459	10.2363
sp|P10636-6|TAU_HUMAN	MAPT	TAU_HUMAN Isoform Tau-D of Microtubule-associated protein tau	1	6.2053	4.29113	5.67815	5.71878	5.91259	5.55657	6.56293	5.15883	5.34927	4.98078	5.26937	7.08703	7.34586	6.79868	7.82569	10.259
sp|P10636-8|TAU_HUMAN	MAPT	TAU_HUMAN Isoform Tau-F of Microtubule-associated protein tau	1	5.24464	5.82866	4.81331	4.36866	6.58489	5.90053	5.731	6.4756	6.26347	6.05319	6.13017	6.25669	6.46117	7.06805	8.12848	8.69148
sp|P10636-7|TAU_HUMAN	MAPT	TAU_HUMAN Isoform Tau-E of Microtubule-associated protein tau	1	4.21131	4.10345	6.01606	4.38984	5.75111	7.32943	5.25958	4.93922	6.73914	6.01566	7.82076	7.48049	6.30495	5.82534	8.3704	9.44325
sp|Q4KMQ2-2|ANO6_HUMAN	ANO6	ANO6_HUMAN Isoform 2 of Anoctamin-6	16	6.6779	6.67855	6.9203	6.88192	6.70539	6.27544	6.76195	6.63699	6.72077	6.48521	6.96326	6.52051	5.28476	5.52116	4.71087	4.25502
sp|Q9UHN6|TMEM2_HUMAN	TMEM2	TMEM2_HUMAN Transmembrane protein 2	11	5.73108	5.86212	5.33199	5.60923	5.54038	5.81296	5.32739	5.30034	5.72538	6.52602	6.13237	6.44577	7.19679	6.85922	7.97449	8.62448
sp|Q8WX93|PALLD_HUMAN	PALLD	PALLD_HUMAN Palladin	47	5.34656	4.96365	5.3205	5.17015	5.91232	6.12186	5.78536	5.97845	5.96203	6.32419	6.11653	6.2281	7.3503	7.07166	8.12874	8.2196
sp|Q9UBI1|COMD3_HUMAN	COMMD3	COMD3_HUMAN COMM domain-containing protein 3	12	6.75897	6.33924	6.5406	6.81684	6.76168	6.69965	7.03803	6.6743	6.47918	6.55111	7.01623	6.95718	5.8373	5.21004	3.64401	4.67563
sp|P35227|PCGF2_HUMAN	PCGF2	PCGF2_HUMAN Polycomb group RING finger protein 2	5	7.05376	7.7801	7.29365	6.97506	6.46059	5.7848	6.57651	6.16164	6.8192	5.87606	6.51032	6.34606	5.18141	5.29522	4.95912	4.92649
sp|P35226|BMI1_HUMAN	BMI1	BMI1_HUMAN Polycomb complex protein BMI-1	1	6.90266	7.69818	7.23301	7.94545	5.59081	6.12172	6.60951	6.40011	5.99569	6.04293	6.69119	5.94114	5.51337	5.56835	5.17604	4.56985
sp|Q86XP3|DDX42_HUMAN	DDX42	DDX42_HUMAN ATP-dependent RNA helicase DDX42	45	7.4846	7.05434	7.79609	7.32471	7.44339	6.93279	7.58827	7.18237	7.14324	6.28901	7.33039	6.24785	3.91711	4.14791	3.32565	2.79226
sp|Q9BTX3|TM208_HUMAN	TMEM208	TM208_HUMAN Transmembrane protein 208	2	7.02089	8.62194	7.28715	6.39642	6.05866	6.14668	6.86304	6.59992	6.54181	6.30024	6.17073	6.10809	5.39089	5.49435	4.47082	4.52838
sp|Q9UEW8|STK39_HUMAN	STK39	STK39_HUMAN STE20/SPS1-related proline-alanine-rich protein kinase	24	6.97015	6.979	7.2171	7.30636	6.80536	6.61786	6.83239	6.7914	6.57935	6.46809	6.64645	6.30155	4.98375	5.27809	4.24337	3.97973
sp|O95747|OXSR1_HUMAN	OXSR1	OXSR1_HUMAN Serine/threonine-protein kinase OSR1	12	7.31511	7.16568	7.41437	6.95956	6.97512	6.76936	7.32876	6.38443	6.50379	6.29873	6.8592	6.45434	4.82553	5.06835	3.99782	3.67983
sp|Q96CT7|CC124_HUMAN	CCDC124	CC124_HUMAN Coiled-coil domain-containing protein 124	19	5.7317	6.44594	5.47661	5.65024	5.54644	5.7083	5.44367	5.55721	5.6932	5.68226	5.77122	5.88846	6.86929	7.00666	8.52055	9.00824
sp|Q7Z6Z7|HUWE1_HUMAN	HUWE1	HUWE1_HUMAN E3 ubiquitin-protein ligase HUWE1	82	6.86539	6.87949	6.89939	6.95268	6.69862	6.53292	6.8636	6.59965	6.67492	6.59464	6.79405	6.44196	5.24494	5.19502	4.63619	4.12653
sp|Q9UKD2|MRT4_HUMAN	MRTO4	MRT4_HUMAN mRNA turnover protein 4 homolog	20	7.90228	7.56426	8.31721	7.83484	6.94937	6.24536	7.19194	6.50697	5.87608	5.36472	6.46271	5.91357	4.27052	5.12891	4.40306	4.06819
sp|Q6XQN6|PNCB_HUMAN	NAPRT1	PNCB_HUMAN Nicotinate phosphoribosyltransferase	23	5.09128	5.01238	5.04431	5.18047	5.63069	6.19739	5.57198	5.95771	5.83819	6.5377	6.04485	6.72035	6.9474	7.27372	7.89082	9.06077
sp|P19623|SPEE_HUMAN	SRM	SPEE_HUMAN Spermidine synthase	25	6.44059	6.63982	6.81026	6.4664	6.92759	6.75935	6.99919	6.76546	6.90485	6.40176	6.90365	6.44718	5.79409	5.13369	4.56933	4.03679
sp|P26006-1|ITA3_HUMAN	ITGA3	ITA3_HUMAN Isoform 2 of Integrin alpha-3	36	4.99094	5.22749	4.78675	5.06024	5.5101	6.00688	5.17354	5.66101	5.65921	6.39309	5.6104	6.33558	7.44192	7.88724	8.43444	9.8212
sp|Q92925|SMRD2_HUMAN	SMARCD2	SMRD2_HUMAN SWI/SNF-related matrix-associated actin-dependent regulator of chromatin subfamily D member 2	24	6.63856	6.55142	6.76672	6.30048	6.89586	6.69104	7.18751	6.66271	6.91684	6.51609	7.04102	6.29393	5.76007	5.22689	4.8765	3.67438
sp|Q96GM5|SMRD1_HUMAN	SMARCD1	SMRD1_HUMAN SWI/SNF-related matrix-associated actin-dependent regulator of chromatin subfamily D member 1	16	6.47202	5.708	6.57326	6.63544	6.54527	6.27	6.40532	6.35812	6.45932	6.07703	6.50334	6.04561	6.60732	5.93289	5.9032	5.50387
sp|Q9HBE1|PATZ1_HUMAN	PATZ1	PATZ1_HUMAN POZ-, AT hook-, and zinc finger-containing protein 1	5	8.30653	9.0195	8.71526	8.34506	5.81739	6.08851	6.88484	6.34874	5.97005	5.11703	6.96865	5.25437	4.09057	5.46432	3.73974	3.86941
sp|Q9BZV1|UBXN6_HUMAN	UBXN6	UBXN6_HUMAN UBX domain-containing protein 6	4	8.71356	7.61696	9.10415	9.04409	7.47808	6.36171	7.28202	6.73015	6.35203	5.41688	7.07452	6.20803	3.43915	3.89144	2.91881	2.36843
sp|Q96D46|NMD3_HUMAN	NMD3	NMD3_HUMAN 60S ribosomal export protein NMD3	33	5.49108	5.14985	5.77868	5.72607	6.15524	6.57792	6.41778	6.27742	6.05685	6.55513	6.54769	6.23735	6.61841	6.73816	6.9454	6.72697
sp|O75175|CNOT3_HUMAN	CNOT3	CNOT3_HUMAN CCR4-NOT transcription complex subunit 3	18	6.25662	6.25525	6.29756	6.47882	6.21972	6.80371	6.73802	6.5225	6.00073	6.51464	6.29911	6.39597	5.48374	5.938	5.72849	6.06712
sp|Q9Y4K1|AIM1_HUMAN	AIM1	AIM1_HUMAN Absent in melanoma 1 protein	8	6.12826	5.3421	5.91437	5.92018	5.87368	6.29156	5.5483	5.99697	6.22229	6.00975	6.16887	6.43491	6.31454	6.85715	7.47016	7.50691
sp|Q9NSD9|SYFB_HUMAN	FARSB	SYFB_HUMAN Phenylalanine--tRNA ligase beta subunit	58	6.97583	6.48124	6.98297	6.99687	6.90928	6.29114	7.04171	6.62195	7.08265	6.60263	7.0529	6.40839	5.82308	5.09711	4.31423	3.31801
sp|P52758|UK114_HUMAN	HRSP12	UK114_HUMAN Ribonuclease UK114	10	4.94528	5.22897	4.8247	5.33278	5.24891	5.78956	5.30998	5.84613	5.38601	6.57443	5.98243	5.84142	7.72773	8.23405	7.99645	9.73118
sp|Q9Y315|DEOC_HUMAN	DERA	DEOC_HUMAN Putative deoxyribose-phosphate aldolase	15	4.6736	4.29821	4.74022	4.78604	5.73819	5.84189	5.54959	5.77172	5.76099	6.39122	6.15913	6.35827	7.60918	7.67869	8.95374	9.68931
sp|Q86UP2|KTN1_HUMAN	KTN1	KTN1_HUMAN Kinectin	96	5.49397	5.54518	5.26414	5.51959	5.64442	5.88659	5.40157	5.74042	5.67526	6.2383	5.60072	6.19392	7.02745	7.42775	8.15496	9.18574
sp|Q9Y4F3|MARF1_HUMAN	KIAA0430	MARF1_HUMAN Meiosis arrest female protein 1	7	8.10593	7.45196	7.21336	7.43042	5.85269	4.99127	5.21107	5.04777	6.05736	4.39739	5.12275	5.48538	6.11803	6.11347	7.41123	7.98993
sp|Q8TE68|ES8L1_HUMAN	EPS8L1	ES8L1_HUMAN Epidermal growth factor receptor kinase substrate 8-like protein 1	9	5.22051	4.57207	5.14432	5.30257	5.7456	6.54402	6.36233	6.50265	5.62	6.39414	6.57488	6.36521	7.4205	7.09483	7.48209	7.65428
sp|Q5VTR2|BRE1A_HUMAN	RNF20	BRE1A_HUMAN E3 ubiquitin-protein ligase BRE1A	43	5.21394	5.26227	5.05223	5.17639	5.8894	6.1142	5.80754	5.77898	5.99584	6.35054	6.04963	6.35666	7.22116	7.01579	8.33804	8.37738
sp|O75150|BRE1B_HUMAN	RNF40	BRE1B_HUMAN E3 ubiquitin-protein ligase BRE1B	44	5.119	5.15723	5.06337	5.14142	5.60864	5.95972	5.69875	5.79057	5.87915	6.24014	6.11749	6.25464	7.34749	7.09108	8.63683	8.89447
sp|Q99543|DNJC2_HUMAN	DNAJC2	DNJC2_HUMAN DnaJ homolog subfamily C member 2	27	7.94166	8.21568	8.3771	8.18523	7.01129	6.55493	7.42086	6.84	6.95003	6.19458	6.92193	6.22035	3.50605	4.16794	2.92239	2.56999
sp|Q9Y5K8|VATD_HUMAN	ATP6V1D	VATD_HUMAN V-type proton ATPase subunit D	15	5.40919	4.90234	5.59699	5.55003	6.05594	6.50643	6.20859	6.33677	6.51477	6.50633	6.49986	6.4901	7.01867	6.57107	6.98798	6.84493
sp|Q0VDF9|HSP7E_HUMAN	HSPA14	HSP7E_HUMAN Heat shock 70 kDa protein 14	20	8.04833	7.16432	7.93301	8.39659	7.20349	6.74837	7.33284	6.93754	6.92663	6.15689	6.91014	6.5024	3.7362	4.35269	3.01014	2.64043
sp|Q8TCJ2|STT3B_HUMAN	STT3B	STT3B_HUMAN Dolichyl-diphosphooligosaccharide--protein glycosyltransferase subunit STT3B	17	6.95779	7.26041	7.28374	7.00966	6.85878	7.5643	8.14036	7.68378	6.02639	6.02325	7.67202	5.89495	4.32294	4.7769	3.71411	2.81064
sp|P46977|STT3A_HUMAN	STT3A	STT3A_HUMAN Dolichyl-diphosphooligosaccharide--protein glycosyltransferase subunit STT3A	28	7.75485	7.87882	8.01133	7.87286	6.64656	6.66393	7.17599	6.62283	6.72042	6.45429	6.87182	6.14324	4.32684	4.70267	3.37452	2.77904
sp|P46926|GNPI1_HUMAN	GNPDA1	GNPI1_HUMAN Glucosamine-6-phosphate isomerase 1	31	4.91956	5.14932	4.83128	5.1013	5.54893	5.97975	5.2545	5.72838	5.75266	6.33774	5.7194	6.44079	7.49358	7.88619	8.29255	9.56408
sp|Q8TDQ7|GNPI2_HUMAN	GNPDA2	GNPI2_HUMAN Glucosamine-6-phosphate isomerase 2	8	4.85826	5.42043	4.92605	4.77015	5.94285	6.18634	5.48473	5.76197	5.88691	6.77476	5.78607	6.16633	7.44157	7.44677	8.02963	9.11718
sp|Q8IYS2-2|K2013_HUMAN	KIAA2013	K2013_HUMAN Isoform 2 of Uncharacterized protein KIAA2013	10	6.48181	6.70886	6.14983	6.3154	6.45795	6.65558	6.65711	6.60833	6.58385	6.31609	6.81458	6.47193	5.92268	5.8326	5.27349	4.74992
sp|P28838|AMPL_HUMAN	LAP3	AMPL_HUMAN Cytosol aminopeptidase	50	4.80948	5.20919	4.85665	5.0143	5.48389	6.16987	5.31075	5.97371	6.02231	6.95257	6.07911	6.59985	6.90908	7.5398	7.92441	9.14506
sp|O75533|SF3B1_HUMAN	SF3B1	SF3B1_HUMAN Splicing factor 3B subunit 1	62	7.05201	6.83238	6.86938	6.80989	7.00886	6.46936	6.95009	6.57114	6.85532	6.37325	6.78209	6.31417	5.61815	5.10643	4.58281	3.80467
sp|O95714|HERC2_HUMAN	HERC2	HERC2_HUMAN E3 ubiquitin-protein ligase HERC2	38	9.53423	10.0936	9.92672	9.58965	6.74593	6.33487	7.19105	6.54249	5.56839	4.9346	5.58736	5.28336	2.96605	4.95096	2.50028	2.25042
sp|Q8IUD2|RB6I2_HUMAN	ERC1	RB6I2_HUMAN ELKS/Rab6-interacting/CAST family member 1	37	6.42651	6.63855	6.37224	6.22407	6.21112	5.8405	6.09227	5.73385	6.02976	5.44235	6.1865	5.69547	6.75707	5.91514	7.49389	6.94072
sp|Q9BV36|MELPH_HUMAN	MLPH	MELPH_HUMAN Melanophilin	5	5.70661	6.30099	5.88691	5.80553	5.53719	5.73497	5.62955	5.86298	6.20913	6.17117	5.8312	6.16895	6.73207	6.85813	7.78352	7.7811
sp|O14497|ARI1A_HUMAN	ARID1A	ARI1A_HUMAN AT-rich interactive domain-containing protein 1A	36	6.42528	6.25482	6.56438	6.6087	6.25077	6.35281	6.5294	6.35491	6.59512	6.48827	6.52391	6.49585	5.9598	5.83212	5.59063	5.17325
sp|Q8NFD5-3|ARI1B_HUMAN	ARID1B	ARI1B_HUMAN Isoform 3 of AT-rich interactive domain-containing protein 1B	18	6.36447	6.20384	6.4447	6.45816	6.44623	6.40141	6.66233	6.13765	6.53103	6.26609	6.63378	6.41587	6.08767	5.79706	5.80785	5.34187
sp|Q9BQ69|MACD1_HUMAN	MACROD1	MACD1_HUMAN O-acetyl-ADP-ribose deacetylase MACROD1	4	7.46267	7.80269	7.53255	7.37113	7.11783	6.43327	7.17005	6.71369	7.53154	6.07277	6.89905	6.78616	3.85465	4.46339	3.60267	3.1859
sp|P20618|PSB1_HUMAN	PSMB1	PSB1_HUMAN Proteasome subunit beta type-1	21	5.38054	5.67428	5.25305	5.60633	5.93205	6.16009	5.75736	5.96663	5.72384	6.33398	6.0376	6.42654	6.79787	6.90296	7.71472	8.33217
sp|O00628|PEX7_HUMAN	PEX7	PEX7_HUMAN Peroxisomal targeting signal 2 receptor	1	5.13316	5.50721	5.503	5.56065	5.72735	6.20713	5.56441	6.10659	5.90254	6.27604	6.31396	6.60773	7.30943	7.19887	7.40484	7.67708
sp|Q96L91|EP400_HUMAN	EP400	EP400_HUMAN E1A-binding protein p400	17	7.78702	8.14828	7.86131	8.23819	6.1996	6.41485	6.51602	6.58932	5.82739	5.98623	6.21875	6.11572	4.42469	5.5096	4.00902	4.15401
sp|Q7L1T6|NB5R4_HUMAN	CYB5R4	NB5R4_HUMAN Cytochrome b5 reductase 4	8	6.6939	7.19224	6.79761	6.94394	6.25553	6.03409	6.18783	6.16977	6.41802	5.86413	6.15978	5.71124	5.75901	7.0172	5.51656	5.27917
sp|O75369-8|FLNB_HUMAN	FLNB	FLNB_HUMAN Isoform 8 of Filamin-B	204	5.77872	5.74147	5.71064	5.71467	6.48183	6.29698	6.19343	6.2009	6.5562	6.35119	6.38897	6.48046	6.8478	6.3339	6.6344	6.28845
sp|O75369|FLNB_HUMAN	FLNB	FLNB_HUMAN Filamin-B	1	5.50768	5.29777	4.20467	5.94712	5.67846	6.05444	5.46847	6.23755	5.98704	8.02629	7.24868	6.60158	7.46455	6.44992	6.40825	7.41753
sp|P21333|FLNA_HUMAN	FLNA	FLNA_HUMAN Filamin-A	197	7.03865	6.88748	7.04591	7.07191	6.87883	6.62015	6.93406	6.81301	6.59645	6.21669	6.65059	6.33784	5.11273	4.94459	4.70916	4.14195
tr|H0Y5C6|H0Y5C6_HUMAN	FLNA	H0Y5C6_HUMAN Filamin-A (Fragment)	1	6.28289	3.62691	7.60954	7.57628	7.41552	6.31684	6.85993	5.899	7.25902	6.0582	7.5206	6.04772	4.89155	4.78302	7.88489	3.96809
sp|Q14315|FLNC_HUMAN	FLNC	FLNC_HUMAN Filamin-C	106	6.5632	6.20404	6.44796	6.5195	6.59225	6.53034	6.58162	6.45483	6.75983	6.54807	6.50832	6.51167	5.95875	5.4992	5.36419	4.95623
sp|Q9BZE9-2|ASPC1_HUMAN	ASPSCR1	ASPC1_HUMAN Isoform 2 of Tether containing UBX domain for GLUT4	16	5.19825	5.8314	5.46902	5.5468	6.07019	6.16889	5.86389	6.06493	6.30191	6.5347	6.77973	6.22999	7.23772	6.85438	7.24804	6.60016
sp|Q9Y3D6|FIS1_HUMAN	FIS1	FIS1_HUMAN Mitochondrial fission 1 protein	5	5.02967	5.3187	5.15772	5.27956	5.28735	5.54018	5.33976	5.43912	5.5845	6.58952	6.12296	6.66099	7.32616	7.77724	7.87329	9.67326
sp|Q9NZC4-3|EHF_HUMAN	EHF	EHF_HUMAN Isoform 3 of ETS homologous factor	1	7.75433	7.77757	8.65857	7.93041	6.97802	6.13419	6.88964	6.7505	6.4313	4.81398	6.5265	5.41562	4.79523	5.05617	3.5455	4.54249
sp|Q5T653|RM02_HUMAN	MRPL2	RM02_HUMAN 39S ribosomal protein L2, mitochondrial	19	5.20992	5.51914	4.94374	5.20924	5.35273	5.92524	5.43169	5.5279	5.7792	6.43827	6.02311	6.52467	7.34226	7.6687	8.07073	9.03347
sp|Q8N5M9|JAGN1_HUMAN	JAGN1	JAGN1_HUMAN Protein jagunal homolog 1	3	7.9674	7.4518	7.98516	7.44975	7.48125	6.23765	7.55558	6.99033	6.46603	6.40031	6.94719	6.28052	5.029	4.42686	2.66582	2.66534
sp|O43909|EXTL3_HUMAN	EXTL3	EXTL3_HUMAN Exostosin-like 3	6	7.28066	7.71905	7.74883	7.34757	6.44047	6.33654	6.56345	6.20733	6.23935	6.26981	6.51775	5.87102	5.28341	5.27496	4.65361	4.24619
sp|P23677|IP3KA_HUMAN	ITPKA	IP3KA_HUMAN Inositol-trisphosphate 3-kinase A	9	5.64077	5.72136	5.96776	5.75283	6.38242	6.14405	6.47956	6.34711	7.00303	6.48662	6.36018	6.59245	7.18266	6.0286	6.54782	5.36278
sp|Q96DU7|IP3KC_HUMAN	ITPKC	IP3KC_HUMAN Inositol-trisphosphate 3-kinase C	6	6.70176	7.23651	7.14698	6.85013	6.52102	6.67379	6.7634	6.29746	6.76343	6.01349	6.51087	6.11482	5.78437	5.70685	5.02493	3.89017
sp|Q96EN8|MOCOS_HUMAN	MOCOS	MOCOS_HUMAN Molybdenum cofactor sulfurase	13	5.54834	5.26716	5.52306	5.77071	6.13355	6.20612	6.21009	5.8948	6.42519	6.50964	6.43997	6.58049	6.84896	6.67491	7.01118	6.95583
sp|Q8IUC4|RHPN2_HUMAN	RHPN2	RHPN2_HUMAN Rhophilin-2	18	8.84845	7.12215	8.71376	8.89402	6.8532	6.51836	7.46353	6.80464	6.53882	5.70209	6.43891	5.82403	3.51467	4.65636	3.33942	2.76759
sp|P05386|RLA1_HUMAN	RPLP1	RLA1_HUMAN 60S acidic ribosomal protein P1	13	4.43661	5.32344	4.75879	5.37515	6.55617	6.97083	6.10894	6.36213	5.59019	7.11124	6.60923	6.71647	7.90769	6.36731	5.5205	8.28529
sp|P05387|RLA2_HUMAN	RPLP2	RLA2_HUMAN 60S acidic ribosomal protein P2	52	4.76014	5.21699	4.59069	5.10763	5.46311	5.76074	5.07743	5.63969	6.24291	6.68293	5.82366	6.84853	7.41928	7.51693	8.03055	9.81882
sp|Q9Y230|RUVB2_HUMAN	RUVBL2	RUVB2_HUMAN RuvB-like 2	67	6.05322	5.63653	6.11734	5.80693	6.81761	6.602	6.94952	6.52034	7.12242	6.77242	6.97392	6.48744	6.74569	5.70695	5.41415	4.27351
sp|P33316|DUT_HUMAN	DUT	DUT_HUMAN Deoxyuridine 5'-triphosphate nucleotidohydrolase, mitochondrial	28	5.00285	4.93096	5.02609	5.08228	5.48471	5.79302	5.21712	5.72767	5.83204	6.31394	5.77103	6.34589	7.65588	7.80657	8.57485	9.43511
sp|Q15907|RB11B_HUMAN	RAB11B	RB11B_HUMAN Ras-related protein Rab-11B	76	5.01667	5.25698	4.67377	5.00358	5.31887	5.63802	5.17627	5.50244	5.72981	6.41045	5.57376	6.07634	7.91169	8.05166	8.91531	9.7444
sp|P62491|RB11A_HUMAN	RAB11A	RB11A_HUMAN Ras-related protein Rab-11A	10	5.47214	5.98005	5.09208	5.44277	4.945	4.4023	3.88206	3.93807	6.24975	5.77143	4.51933	5.9836	8.69228	8.49373	9.21425	11.9212
sp|P57735|RAB25_HUMAN	RAB25	RAB25_HUMAN Ras-related protein Rab-25	10	5.39742	4.76734	4.9815	5.06797	5.69377	5.83697	5.62564	5.55685	6.08242	6.37695	5.85689	6.21348	7.52091	7.5018	8.4392	9.08089
sp|Q9H444|CHM4B_HUMAN	CHMP4B	CHM4B_HUMAN Charged multivesicular body protein 4b	16	5.04745	5.69267	4.74854	5.16886	5.19931	5.13292	4.52719	5.20918	5.53262	6.00589	4.8641	5.94152	8.17689	8.56013	9.57192	10.6208
sp|Q8TEX9-2|IPO4_HUMAN	IPO4	IPO4_HUMAN Isoform 2 of Importin-4	42	5.48982	5.24346	5.69317	5.88683	6.04322	6.35837	6.26532	6.2692	6.03015	6.44512	6.56989	6.56127	6.80083	6.59951	6.84615	6.89768
sp|Q15021|CND1_HUMAN	NCAPD2	CND1_HUMAN Condensin complex subunit 1	44	8.95521	8.67037	8.9447	8.83952	7.07639	6.68051	7.38353	6.9105	6.17625	5.71418	6.37856	5.788	3.15297	4.27086	2.76896	2.28948
sp|Q15833|STXB2_HUMAN	STXBP2	STXB2_HUMAN Syntaxin-binding protein 2	18	7.33811	7.8038	7.25489	7.24551	6.92248	6.80377	7.12257	6.78471	6.48338	6.27227	6.72755	6.26113	4.45074	4.96783	3.95249	3.60877
sp|Q3B7T1|EDRF1_HUMAN	EDRF1	EDRF1_HUMAN Erythroid differentiation-related factor 1	21	7.43031	7.80429	7.85683	7.72436	7.12776	6.63152	7.14925	6.65045	6.6219	6.01905	6.88042	6.17186	4.47002	4.5347	3.7283	3.19897
sp|Q5JU85-2|IQEC2_HUMAN	IQSEC2	IQEC2_HUMAN Isoform 2 of IQ motif and SEC7 domain-containing protein 2	4	7.44947	7.688	8.52737	7.47258	6.8183	6.49581	6.60434	6.64505	6.08232	5.81242	6.04453	5.85812	4.86575	4.82948	4.68824	4.1182
sp|Q6DN90|IQEC1_HUMAN	IQSEC1	IQEC1_HUMAN IQ motif and SEC7 domain-containing protein 1	3	6.30603	5.96345	6.34909	6.83943	6.6812	6.60316	6.54013	5.74487	6.01623	6.22506	6.07152	5.90317	5.8399	6.03632	6.24749	6.63296
sp|Q96DB9|FXYD5_HUMAN	FXYD5	FXYD5_HUMAN FXYD domain-containing ion transport regulator 5	2	5.75743	5.94282	4.89955	5.82251	5.47296	5.73235	5.01831	4.76591	6.26579	6.83914	5.30238	5.19741	7.18857	6.12911	7.53643	12.1294
sp|P78371|TCPB_HUMAN	CCT2	TCPB_HUMAN T-complex protein 1 subunit beta	103	6.07227	5.8531	6.00841	5.94523	6.80842	6.50184	6.63913	6.68473	7.06564	6.8343	6.7732	6.86294	6.36493	5.40834	5.56603	4.61148
sp|P61764|STXB1_HUMAN	STXBP1	STXB1_HUMAN Syntaxin-binding protein 1	10	7.65999	7.55646	8.14877	7.62414	7.43006	6.99576	7.5907	7.12861	6.9076	5.99806	7.33044	6.32672	3.76019	3.90213	3.0728	2.56758
sp|Q5SRE5|NU188_HUMAN	NUP188	NU188_HUMAN Nucleoporin NUP188 homolog	28	8.33658	8.07003	8.56883	8.58888	6.76915	6.57352	7.20718	6.77427	6.21573	5.88944	6.23797	5.89911	3.70322	4.79894	3.22678	3.14039
sp|Q8TDD5|MCLN3_HUMAN	MCOLN3	MCLN3_HUMAN Mucolipin-3	3	6.37209	7.07522	5.94974	6.59532	5.86571	6.61654	5.60135	6.31389	6.76646	6.10945	5.51128	6.58282	6.72336	6.86487	6.02805	5.02387
sp|Q96PK6|RBM14_HUMAN	RBM14	RBM14_HUMAN RNA-binding protein 14	18	7.69945	7.83324	7.45236	7.32665	6.69929	6.23702	6.86671	6.36569	6.27279	5.77453	6.33667	5.81326	4.93354	5.2036	4.7111	4.4741
sp|Q9BWF3|RBM4_HUMAN	RBM4	RBM4_HUMAN RNA-binding protein 4	19	7.73269	7.84003	7.79791	7.58734	6.49643	6.15757	6.78989	6.48593	6.22871	5.86653	6.30529	5.97701	4.87953	5.12903	4.67196	4.05415
sp|Q8IYB8|SUV3_HUMAN	SUPV3L1	SUV3_HUMAN ATP-dependent RNA helicase SUPV3L1, mitochondrial	25	6.08377	5.1662	6.38772	6.35701	6.63777	6.29766	6.46106	6.10547	6.60276	6.17888	6.78815	6.16084	6.77269	6.0963	6.40607	5.49765
sp|Q92804|RBP56_HUMAN	TAF15	RBP56_HUMAN TATA-binding protein-associated factor 2N	10	6.37123	5.37246	6.35894	6.0452	6.47361	5.59066	6.64785	5.61712	6.35912	5.0476	6.53635	5.13124	7.14399	5.46219	8.95105	6.89139
sp|P35637|FUS_HUMAN	FUS	FUS_HUMAN RNA-binding protein FUS	8	5.87955	5.32328	6.00305	5.88422	5.85842	5.40044	5.85217	5.14884	5.59669	5.29523	6.71224	5.71011	7.2812	6.15547	9.60986	8.28923
sp|Q9UHB9|SRP68_HUMAN	SRP68	SRP68_HUMAN Signal recognition particle subunit SRP68	36	8.3896	7.32183	8.51589	8.46737	7.2081	6.95882	7.50287	7.20417	6.25242	5.78377	6.93719	6.00479	3.38742	4.29474	3.13099	2.64003
sp|Q5THJ4|VP13D_HUMAN	VPS13D	VP13D_HUMAN Vacuolar protein sorting-associated protein 13D	13	8.05469	7.6496	7.83051	7.92178	6.33326	6.27205	6.64701	6.22876	6.44138	5.85364	6.30594	5.75133	4.90328	5.1029	4.56668	4.1372
sp|Q6ZMI0|PPR21_HUMAN	PPP1R21	PPR21_HUMAN Protein phosphatase 1 regulatory subunit 21	18	5.60315	5.49959	5.84709	5.66975	6.56953	6.17837	6.32778	6.19436	7.13145	6.65037	6.88898	6.6139	7.73926	6.30302	6.19385	4.58955
sp|P07741|APT_HUMAN	APRT	APT_HUMAN Adenine phosphoribosyltransferase	18	5.21465	5.13949	4.74481	5.04341	5.6111	5.82209	5.39116	5.76308	5.88661	6.40928	5.86111	6.21415	7.80056	7.73996	8.05752	9.30101
sp|Q9Y2W6|TDRKH_HUMAN	TDRKH	TDRKH_HUMAN Tudor and KH domain-containing protein	5	7.15136	7.42717	6.99125	6.91905	6.60985	6.60486	6.49776	6.58342	6.50237	6.21119	6.75459	6.23708	5.05247	5.26548	4.59852	4.59357
sp|Q15075|EEA1_HUMAN	EEA1	EEA1_HUMAN Early endosome antigen 1	73	5.04715	5.37839	4.89081	5.18198	5.36763	5.68759	5.14546	5.53758	5.70521	6.22512	5.51729	6.21022	7.68614	7.81792	8.69672	9.90479
sp|Q7Z406-6|MYH14_HUMAN	MYH14	MYH14_HUMAN Isoform 6 of Myosin-14	95	5.83221	4.96348	5.88225	5.8631	6.50522	6.3698	6.67585	6.48286	6.7152	6.68163	6.77647	6.33276	6.86507	6.10616	6.40473	5.54321
sp|P35580-3|MYH10_HUMAN	MYH10	MYH10_HUMAN Isoform 3 of Myosin-10	131	5.16937	4.98137	5.08247	5.04712	5.99144	6.23734	5.84495	5.97306	5.99495	6.40229	6.19666	6.25419	7.44076	7.1404	8.12027	8.12336
sp|P35579|MYH9_HUMAN	MYH9	MYH9_HUMAN Myosin-9	314	4.75292	4.5911	4.82356	4.73975	5.90952	6.36862	6.08428	6.19818	6.18299	6.76179	6.53459	6.4199	7.58192	7.07549	8.10758	7.86784
sp|Q13439|GOGA4_HUMAN	GOLGA4	GOGA4_HUMAN Golgin subfamily A member 4	70	6.42897	7.43269	6.61784	6.30548	6.44318	6.18936	6.28142	6.15698	6.58832	6.2031	6.32871	6.35986	6.03302	5.6565	5.77082	5.20376
sp|Q9NRA8-3|4ET_HUMAN	EIF4ENIF1	4ET_HUMAN Isoform 3 of Eukaryotic translation initiation factor 4E transporter	17	6.97652	7.63615	7.12875	6.81736	6.37049	5.93521	6.30884	6.31646	6.36172	5.88865	6.20418	6.48573	5.64847	5.49904	5.25086	5.17156
sp|Q9P2E9|RRBP1_HUMAN	RRBP1	RRBP1_HUMAN Ribosome-binding protein 1	56	7.84457	9.4005	7.82755	7.87427	5.45493	5.50295	5.69112	5.59083	5.14746	5.01042	5.22182	5.40829	5.02268	6.83254	5.98355	6.18652
sp|Q8N4C6-7|NIN_HUMAN	NIN	NIN_HUMAN Isoform 7 of Ninein	2	7.63872	7.98808	8.12023	7.34302	6.23879	6.51349	6.80275	6.94382	5.24306	5.17012	6.01918	5.41845	4.10007	5.64874	5.49659	5.3149
sp|Q6YHU6|THADA_HUMAN	THADA	THADA_HUMAN Thyroid adenoma-associated protein	23	7.03467	6.2651	7.29674	7.10821	6.33845	6.76944	7.06627	6.88302	6.29558	6.19092	6.59462	6.3074	5.10537	5.42041	4.60777	4.71603
sp|O14744|ANM5_HUMAN	PRMT5	ANM5_HUMAN Protein arginine N-methyltransferase 5	48	5.26475	5.62487	4.9998	5.18063	5.61734	5.99592	5.42454	5.74697	5.76418	6.31755	5.73609	6.29564	7.33862	7.52092	8.15478	9.0174
sp|Q96I25|SPF45_HUMAN	RBM17	SPF45_HUMAN Splicing factor 45	18	7.81837	8.07672	7.66992	7.48937	6.84262	6.18381	6.98279	6.06491	6.08001	5.18616	6.13977	5.50235	4.98005	5.07632	5.2093	4.69752
sp|P04114|APOB_HUMAN	APOB	APOB_HUMAN Apolipoprotein B-100	13	6.0782	7.5075	6.21877	5.61893	6.10327	6.08367	6.097	5.97563	6.07752	6.24953	6.14457	6.28595	6.24257	6.25248	6.40812	6.6563
sp|Q9BY43|CHM4A_HUMAN	CHMP4A	CHM4A_HUMAN Charged multivesicular body protein 4a	17	5.12886	5.36564	5.03291	5.0067	5.32048	5.45806	5.18211	5.36899	5.74872	6.18292	5.64234	6.36337	7.68045	7.76324	8.9136	9.84161
tr|E9PSI1|E9PSI1_HUMAN	TM9SF1	E9PSI1_HUMAN Transmembrane 9 superfamily member 1	6	6.91273	6.04276	6.84777	6.66577	7.02171	6.29732	6.7866	6.48131	6.72834	6.25357	6.47261	6.67909	5.79756	5.47399	4.96351	4.57537
sp|Q9UPN4|AZI1_HUMAN	AZI1	AZI1_HUMAN 5-azacytidine-induced protein 1	7	8.72556	8.27054	9.02168	8.74564	6.04513	6.13869	6.42762	6.12035	5.50914	5.57348	5.65912	5.92105	3.52048	6.97574	3.51251	3.83327
sp|Q7Z3J2|CP062_HUMAN	C16orf62	CP062_HUMAN UPF0505 protein C16orf62	18	6.78382	5.35255	6.89828	7.0916	6.78297	6.21065	6.6264	6.50768	6.69998	6.33336	6.60065	6.12976	5.4965	5.61168	5.48068	5.39343
sp|O00534|VMA5A_HUMAN	VWA5A	VMA5A_HUMAN von Willebrand factor A domain-containing protein 5A	6	5.47882	5.4872	5.43433	5.18776	6.29007	6.25784	5.57764	5.95661	6.45354	6.56245	6.36236	6.67762	7.30926	6.29307	7.41596	7.25547
sp|Q9UNX4|WDR3_HUMAN	WDR3	WDR3_HUMAN WD repeat-containing protein 3	20	9.90782	9.69142	10.1606	9.91231	6.51346	6.43621	6.96348	6.71488	5.69332	5.12034	5.78203	5.28841	2.68197	4.30106	2.57189	2.26075
sp|Q9UK73|FEM1B_HUMAN	FEM1B	FEM1B_HUMAN Protein fem-1 homolog B	10	5.51101	5.40704	5.98425	5.8976	6.18949	6.26793	6.14522	6.04977	6.13925	6.76667	6.69458	6.21535	7.02692	6.58811	6.91496	6.20186
sp|Q8N2G8|GHDC_HUMAN	GHDC	GHDC_HUMAN GH3 domain-containing protein	7	5.80969	5.93569	5.80017	5.85087	5.97057	6.27113	5.76206	6.16747	6.2694	6.74066	6.36415	6.45961	6.64969	6.67165	6.85568	6.42153
sp|Q69YQ0|CYTSA_HUMAN	SPECC1L	CYTSA_HUMAN Cytospin-A	19	6.14935	5.936	6.56482	6.43483	6.56586	6.64085	6.68236	6.23965	6.73407	6.71677	6.98746	6.89898	6.05482	5.52128	5.33203	4.54089
sp|Q9HA77|SYCM_HUMAN	CARS2	SYCM_HUMAN Probable cysteine--tRNA ligase, mitochondrial	11	5.38991	5.31019	5.55028	5.50473	6.10362	6.41487	6.18266	6.24018	6.10286	6.34873	6.66765	6.44976	6.98474	6.64855	6.98782	7.11347
sp|Q32P44-2|EMAL3_HUMAN	EML3	EMAL3_HUMAN Isoform 2 of Echinoderm microtubule-associated protein-like 3	10	7.62699	8.28146	7.82782	7.36063	6.47516	6.02493	6.62865	6.37196	6.31097	5.79273	6.15027	5.85682	5.48936	5.34418	4.4911	3.96697
sp|Q32P44|EMAL3_HUMAN	EML3	EMAL3_HUMAN Echinoderm microtubule-associated protein-like 3	6	7.161	7.41583	7.32827	6.92642	6.82153	6.59203	6.97171	6.48015	6.55504	5.55972	6.11379	5.81864	5.58298	5.48713	4.98114	4.20462
sp|Q14195-2|DPYL3_HUMAN	DPYSL3	DPYL3_HUMAN Isoform LCRMP-4 of Dihydropyrimidinase-related protein 3	34	5.23379	5.34447	5.39884	5.2284	6.01807	6.02186	5.83278	5.98405	6.52079	6.52128	6.08922	6.58245	7.1855	6.90424	7.59962	7.53462
sp|Q16555|DPYL2_HUMAN	DPYSL2	DPYL2_HUMAN Dihydropyrimidinase-related protein 2	36	5.15154	5.2189	5.38136	5.14202	6.04855	6.25865	5.9982	6.01064	6.28256	6.50541	6.32137	6.45086	7.42471	6.82622	7.50202	7.47699
sp|P54098|DPOG1_HUMAN	POLG	DPOG1_HUMAN DNA polymerase subunit gamma-1	12	7.77329	7.9369	8.1131	7.52219	7.01509	6.45877	7.13374	6.51319	6.47213	6.13507	6.90978	6.3688	4.41123	4.48056	3.54134	3.21483
sp|O00151|PDLI1_HUMAN	PDLIM1	PDLI1_HUMAN PDZ and LIM domain protein 1	26	4.90618	5.27331	4.94536	5.2754	5.37147	5.86915	5.07239	5.66046	5.6173	6.22876	5.5275	6.50659	7.46462	7.71515	8.60939	9.95695
sp|Q13428-4|TCOF_HUMAN	TCOF1	TCOF_HUMAN Isoform 4 of Treacle protein	74	5.94166	5.47625	5.87176	5.95474	5.89234	6.05833	5.86448	5.96505	5.79524	6.08006	5.90531	6.06943	6.70598	6.95647	7.65347	7.80941
sp|P20248|CCNA2_HUMAN	CCNA2	CCNA2_HUMAN Cyclin-A2	16	5.97733	5.69455	6.14329	6.27804	6.43791	6.63337	6.13533	6.44348	6.37816	6.40328	6.43727	6.52219	6.26406	6.22338	6.01017	6.01819
sp|P54920|SNAA_HUMAN	NAPA	SNAA_HUMAN Alpha-soluble NSF attachment protein	19	5.08039	5.26896	5.53023	5.3812	6.26108	6.60313	6.32431	6.34305	6.37904	6.62729	6.7556	6.78898	7.00663	6.53118	6.70454	6.41439
sp|Q68EM7|RHG17_HUMAN	ARHGAP17	RHG17_HUMAN Rho GTPase-activating protein 17	14	8.45191	8.3371	8.11962	7.62589	7.2743	6.84928	7.19287	6.78634	6.32195	5.81603	6.38607	6.0195	3.91414	4.18161	3.65112	3.07226
sp|P09417|DHPR_HUMAN	QDPR	DHPR_HUMAN Dihydropteridine reductase	19	6.12876	4.99945	6.49534	6.62863	6.84555	6.41978	6.95739	6.88917	7.23504	7.10072	7.2843	6.76855	6.25427	5.45653	4.72091	3.81562
sp|Q86UK7|ZN598_HUMAN	ZNF598	ZN598_HUMAN Zinc finger protein 598	17	6.38664	5.61137	6.63913	6.50566	6.33543	6.05921	6.24766	6.06991	6.14364	6.24247	6.28022	6.05875	6.39761	6.29886	6.71847	6.00497
sp|P34897|GLYM_HUMAN	SHMT2	GLYM_HUMAN Serine hydroxymethyltransferase, mitochondrial	106	5.25179	5.49847	5.08563	5.27469	5.62867	5.91663	5.42607	5.73533	5.73704	6.24933	5.89016	6.27212	7.24738	7.48552	8.10872	9.19246
sp|P34896-2|GLYC_HUMAN	SHMT1	GLYC_HUMAN Isoform 2 of Serine hydroxymethyltransferase, cytosolic	27	5.08179	4.63195	4.9742	5.03678	5.53124	6.47467	5.74637	6.14419	5.67484	6.61998	6.28757	6.50901	6.88029	7.50588	7.81737	9.08387
tr|B4DPM9|B4DPM9_HUMAN	SHMT1	B4DPM9_HUMAN Serine hydroxymethyltransferase	1	5.21884	4.93851	4.93647	3.57782	7.44732	6.42986	5.99598	6.08474	6.16245	5.4326	6.21853	6.30143	6.75391	7.20621	7.55527	9.74007
tr|G3V2Y4|G3V2Y4_HUMAN	SHMT2	G3V2Y4_HUMAN Serine hydroxymethyltransferase (Fragment)	1	3.69324	4.5755	3.81834	3.82627	4.63716	5.57725	4.91438	6.08086	4.62798	4.62817	5.70293	6.28251	8.10878	8.43681	11.2841	13.8057
tr|J3KRZ5|J3KRZ5_HUMAN	SHMT1	J3KRZ5_HUMAN Serine hydroxymethyltransferase, cytosolic (Fragment)	1	6.5548	4.67342	4.44493	5.86778	6.32346	5.38639	5.21801	5.49127	7.50859	6.82396	3.63327	4.97319	8.88444	6.19544	7.65999	10.3611
sp|Q8NEG4|FA83F_HUMAN	FAM83F	FA83F_HUMAN Protein FAM83F	4	8.09931	7.87061	8.08027	7.52761	6.36713	6.11774	6.58301	5.61234	6.41905	4.71424	5.96928	5.28806	5.60518	5.39373	5.70789	4.64454
sp|Q99996-6|AKAP9_HUMAN	AKAP9	AKAP9_HUMAN Isoform 6 of A-kinase anchor protein 9	53	7.09549	7.38413	7.2174	7.14071	6.68277	6.45264	6.67891	6.5352	6.54354	6.28097	6.53441	6.41033	5.02877	5.10542	4.56662	4.34269
sp|Q92879-4|CELF1_HUMAN	CELF1	CELF1_HUMAN Isoform 4 of CUGBP Elav-like family member 1	18	5.10876	4.72237	5.26894	5.28266	5.92016	6.15651	6.55594	6.16225	6.01206	6.66573	6.16314	6.30692	6.99126	6.94327	7.54528	8.19475
sp|Q9UJX6|ANC2_HUMAN	ANAPC2	ANC2_HUMAN Anaphase-promoting complex subunit 2	18	7.50802	13.7225	7.25025	6.59268	6.42394	6.23911	6.5848	6.38264	6.32701	5.74461	6.32453	5.85388	4.267	4.46531	3.46421	2.8495
sp|Q92922|SMRC1_HUMAN	SMARCC1	SMRC1_HUMAN SWI/SNF complex subunit SMARCC1	50	5.82924	5.772	6.03188	6.07492	6.25025	5.99023	6.24438	6.09539	6.38327	6.42474	6.50922	6.43656	7.10136	6.38302	6.67532	5.79823
sp|Q8TAQ2-3|SMRC2_HUMAN	SMARCC2	SMRC2_HUMAN Isoform 3 of SWI/SNF complex subunit SMARCC2	54	5.52686	5.68542	5.55461	5.62911	6.01688	6.06859	6.04784	6.08047	6.29405	6.39346	6.37952	6.3403	7.31544	6.81217	7.2592	6.59606
sp|Q96CW5|GCP3_HUMAN	TUBGCP3	GCP3_HUMAN Gamma-tubulin complex component 3	21	8.26161	9.0543	8.61232	8.51173	6.82887	6.52282	7.38728	6.99459	6.15179	5.63983	6.35387	5.87753	3.50373	4.41028	3.09248	2.79695
sp|P12081|SYHC_HUMAN	HARS	SYHC_HUMAN Histidine--tRNA ligase, cytoplasmic	57	5.10701	5.11208	5.15966	5.08713	5.95179	6.02105	5.70153	6.058	6.3156	6.53751	6.04507	6.4882	7.73105	7.16729	7.83062	7.68642
sp|P49590|SYHM_HUMAN	HARS2	SYHM_HUMAN Probable histidine--tRNA ligase, mitochondrial	23	5.84704	5.60605	5.86332	5.58198	6.67945	6.22763	6.64702	6.30106	6.97827	6.60175	6.92538	6.50887	7.45977	5.73833	6.18123	4.85285
tr|E9PG66|E9PG66_HUMAN	HARS2	E9PG66_HUMAN Probable histidine--tRNA ligase, mitochondrial	1	4.90527	10.5609	5.15195	4.6368	5.95922	5.51831	5.72369	4.50709	7.29719	5.71721	6.06563	6.44707	6.44792	7.81238	7.21698	6.03242
sp|Q15057|ACAP2_HUMAN	ACAP2	ACAP2_HUMAN Arf-GAP with coiled-coil, ANK repeat and PH domain-containing protein 2	20	5.62045	5.34099	5.57572	5.53174	6.39609	6.27922	6.26199	6.24397	6.63025	6.50023	6.61822	6.56136	7.63187	6.46476	6.74001	5.60315
sp|Q96P50|ACAP3_HUMAN	ACAP3	ACAP3_HUMAN Arf-GAP with coiled-coil, ANK repeat and PH domain-containing protein 3	3	5.52699	5.63248	5.82508	5.45004	6.25296	5.79671	6.32844	6.07636	6.53321	6.92418	6.31668	6.13693	7.26151	6.48197	7.04551	6.41094
sp|Q9H0D6|XRN2_HUMAN	XRN2	XRN2_HUMAN 5'-3' exoribonuclease 2	63	5.75747	5.79872	5.73128	5.83066	5.73745	5.81247	5.54477	5.74973	5.95419	6.24369	5.82223	6.07468	6.94523	7.09277	7.67401	8.23066
sp|Q9NRV9|HEBP1_HUMAN	HEBP1	HEBP1_HUMAN Heme-binding protein 1	13	4.91987	5.24656	4.50114	4.84099	5.30642	5.80857	4.8366	5.58253	5.55968	6.30322	5.64763	6.3815	7.49454	8.10532	9.05318	10.4122
sp|P09601|HMOX1_HUMAN	HMOX1	HMOX1_HUMAN Heme oxygenase 1	10	5.23898	5.12289	5.15882	5.38302	5.81572	5.76757	5.72685	5.92227	6.05472	6.48547	6.24385	6.45523	7.39567	6.98487	8.1313	8.11277
sp|Q92797|SYMPK_HUMAN	SYMPK	SYMPK_HUMAN Symplekin	50	7.53349	7.50176	7.41526	7.57176	6.7076	6.62424	7.06158	6.74121	6.59316	6.30517	6.35514	6.21115	4.92274	5.01555	3.98176	3.45842
sp|Q8IWT3|CUL9_HUMAN	CUL9	CUL9_HUMAN Cullin-9	4	8.5213	6.13838	8.41183	8.86706	6.90095	6.76278	6.69451	5.90159	5.78732	5.92977	6.406	5.84306	4.66268	5.17906	3.90495	4.08875
sp|Q14999-2|CUL7_HUMAN	CUL7	CUL7_HUMAN Isoform 2 of Cullin-7	1	8.94232	7.58546	9.0526	9.57367	6.84708	6.79106	7.55588	7.52186	6.06133	5.59119	6.35357	5.66688	3.02002	4.43646	2.82437	2.17626
sp|P10586|PTPRF_HUMAN	PTPRF	PTPRF_HUMAN Receptor-type tyrosine-protein phosphatase F	22	5.56048	5.81473	5.9914	5.96368	6.38131	6.2411	6.25179	6.21017	6.72917	6.72994	6.61624	6.61537	7.03821	6.32199	6.02691	5.50752
sp|Q13332-3|PTPRS_HUMAN	PTPRS	PTPRS_HUMAN Isoform PTPS-MEB of Receptor-type tyrosine-protein phosphatase S	13	5.60918	5.45468	6.01442	5.75791	5.85651	6.52223	6.2033	6.65819	6.51798	6.44046	6.69117	6.66659	7.03677	6.6547	6.31922	5.59669
sp|Q12872-2|SFSWA_HUMAN	SFSWAP	SFSWA_HUMAN Isoform 2 of Splicing factor, suppressor of white-apricot homolog	13	6.86205	6.86749	7.13092	7.19952	6.246	5.92536	6.20379	5.88494	6.07356	6.012	6.2946	5.93131	5.51457	6.06251	6.21779	5.5736
sp|Q15024|EXOS7_HUMAN	EXOSC7	EXOS7_HUMAN Exosome complex component RRP42	14	5.47274	5.89548	5.17025	5.21413	5.80055	5.88474	5.54386	5.708	5.64245	5.97275	5.59386	6.03466	7.57217	7.36191	8.2635	8.86895
sp|P11172|UMPS_HUMAN	UMPS	UMPS_HUMAN Uridine 5'-monophosphate synthase	28	7.76231	7.49443	7.48856	7.45297	7.03713	6.64797	7.15113	6.78871	6.64853	6.30436	6.52884	6.1435	4.58524	4.84412	3.83387	3.28833
sp|P22570-3|ADRO_HUMAN	FDXR	ADRO_HUMAN Isoform 3 of NADPH:adrenodoxin oxidoreductase, mitochondrial	23	7.97029	8.10275	8.24235	8.05972	6.97611	6.4015	7.04536	6.61227	6.65433	5.95891	6.61701	5.87404	4.28731	4.64598	3.65955	2.89252
sp|P41227|NAA10_HUMAN	NAA10	NAA10_HUMAN N-alpha-acetyltransferase 10	19	5.49683	4.56364	5.43072	5.25596	6.83429	7.35376	7.4055	7.31643	6.74845	7.08231	8.29379	6.5392	6.52792	5.24967	5.45504	4.44651
sp|Q8NDH3|PEPL1_HUMAN	NPEPL1	PEPL1_HUMAN Probable aminopeptidase NPEPL1	3	5.05749	5.42942	5.55621	6.02516	6.22324	6.20264	5.10347	5.3465	6.1278	6.54809	6.01177	7.02222	6.97234	6.46294	7.26057	8.65012
sp|Q9H0L4|CSTFT_HUMAN	CSTF2T	CSTFT_HUMAN Cleavage stimulation factor subunit 2 tau variant	24	5.07617	5.59577	4.8855	5.01974	5.61355	6.08258	5.57079	5.82641	5.7601	6.29875	6.29335	6.48096	7.00687	7.19081	8.09735	9.2013
sp|P33240|CSTF2_HUMAN	CSTF2	CSTF2_HUMAN Cleavage stimulation factor subunit 2	10	5.20073	5.08414	4.64974	4.97172	5.53522	5.92071	5.34206	5.65681	5.58006	6.53108	5.57227	6.12808	7.66249	8.12315	8.10121	9.94053
sp|Q9Y5V0|ZN706_HUMAN	ZNF706	ZN706_HUMAN Zinc finger protein 706	4	5.43136	4.04554	5.48986	6.09153	5.88272	5.93407	5.84213	5.99226	5.54685	5.70243	6.35093	6.28384	6.56563	7.63728	8.84499	8.35858
sp|Q96MW1|CCD43_HUMAN	CCDC43	CCD43_HUMAN Coiled-coil domain-containing protein 43	11	5.10102	5.19181	4.90439	5.10511	5.5368	5.94487	5.31774	5.93213	5.66619	6.68639	5.91222	6.50744	7.06151	7.74505	8.16341	9.22392
sp|O00401|WASL_HUMAN	WASL	WASL_HUMAN Neural Wiskott-Aldrich syndrome protein	18	5.19708	5.19015	5.09265	5.33854	5.92594	6.11246	5.43918	5.84376	6.04803	6.53085	6.3165	6.26554	7.23597	7.36549	7.77927	8.31862
sp|Q9C0C9|UBE2O_HUMAN	UBE2O	UBE2O_HUMAN Ubiquitin-conjugating enzyme E2 O	68	5.80694	5.56293	5.83929	5.72221	6.62271	6.3935	6.38449	6.33297	6.73743	6.66979	6.67909	6.5078	6.86341	6.06659	6.10061	5.71023
sp|Q13813-2|SPTN1_HUMAN	SPTAN1	SPTN1_HUMAN Isoform 2 of Spectrin alpha chain, non-erythrocytic 1	148	6.25377	5.75044	6.15865	6.16843	5.6617	5.86291	5.63622	5.75117	5.61256	5.92985	5.83763	6.00645	6.78141	7.12503	7.71275	7.75103
sp|Q9Y613|FHOD1_HUMAN	FHOD1	FHOD1_HUMAN FH1/FH2 domain-containing protein 1	14	8.55036	8.9566	8.81182	8.81591	6.62699	6.31017	7.23863	6.62008	6.2453	5.54545	6.36837	5.75349	3.72095	4.60765	3.19335	2.63487
sp|P07814|SYEP_HUMAN	EPRS	SYEP_HUMAN Bifunctional glutamate/proline--tRNA ligase	148	8.54561	8.11639	8.55943	8.57121	7.0082	6.51045	7.32296	6.92133	6.51559	5.84992	6.52471	5.91012	3.73176	4.44397	3.05002	2.41833
sp|P47897|SYQ_HUMAN	QARS	SYQ_HUMAN Glutamine--tRNA ligase	62	7.36937	7.05457	7.40556	7.51885	7.01243	6.71126	7.1537	6.9428	6.664	6.42487	7.08029	6.35092	4.50329	4.65987	3.8482	3.30001
sp|Q9Y5B9|SP16H_HUMAN	SUPT16H	SP16H_HUMAN FACT complex subunit SPT16	25	10.6426	9.45207	10.2029	10.4827	6.56296	6.46701	6.84805	6.51623	5.25664	4.8633	5.68294	5.20927	2.50916	4.56829	2.491	2.24492
sp|Q969F9|HPS3_HUMAN	HPS3	HPS3_HUMAN Hermansky-Pudlak syndrome 3 protein	9	6.89425	7.72945	7.05697	7.20435	6.40767	5.98784	6.27473	6.14024	6.35538	6.28344	6.00616	6.0331	5.84132	5.65926	5.42694	4.69891
sp|Q14980|NUMA1_HUMAN	NUMA1	NUMA1_HUMAN Nuclear mitotic apparatus protein 1	52	7.82854	7.57462	8.02064	7.9656	6.64112	6.42766	6.86483	6.36567	6.00601	5.76242	6.15791	5.95658	4.65701	5.48583	4.32552	3.96002
sp|Q14980-2|NUMA1_HUMAN	NUMA1	NUMA1_HUMAN Isoform 2 of Nuclear mitotic apparatus protein 1	2	8.16577	7.51147	7.77779	7.91818	6.04571	6.89404	6.54995	6.22988	6.14607	5.89216	6.27014	5.94314	4.77362	5.88979	4.4947	3.49757
sp|Q9P287-2|BCCIP_HUMAN	BCCIP	BCCIP_HUMAN Isoform 2 of BRCA2 and CDKN1A-interacting protein	24	6.78743	5.6541	6.94357	6.99494	7.1615	6.58033	7.20672	6.93286	6.95664	6.66034	6.96808	6.84694	5.12864	4.85145	4.37444	3.95202
sp|Q9P287|BCCIP_HUMAN	BCCIP	BCCIP_HUMAN BRCA2 and CDKN1A-interacting protein	13	6.91306	7.3002	6.89562	6.88322	6.82574	6.53121	7.02608	6.54909	7.05877	6.32196	6.68514	6.51783	5.12487	5.20564	4.31989	3.84169
sp|Q3ZAQ7|VMA21_HUMAN	VMA21	VMA21_HUMAN Vacuolar ATPase assembly integral membrane protein VMA21	4	4.42292	5.43819	4.75495	5.02121	6.53496	8.67325	7.04368	6.73504	5.13171	7.94103	6.92259	6.26436	6.35906	6.29838	5.86671	6.59197
sp|Q13217|DNJC3_HUMAN	DNAJC3	DNJC3_HUMAN DnaJ homolog subfamily C member 3	24	6.68607	5.82102	6.79077	6.84795	7.02496	6.72081	7.13523	6.70504	6.68504	6.75061	7.2576	6.6406	5.50739	5.02508	4.83548	3.56634
sp|Q9H3S7|PTN23_HUMAN	PTPN23	PTN23_HUMAN Tyrosine-protein phosphatase non-receptor type 23	46	6.20086	5.97872	6.32813	6.15719	6.70905	6.59232	6.68836	6.56711	6.94227	6.6236	6.80116	6.70825	6.12397	5.52192	5.33677	4.7203
sp|O00139-4|KIF2A_HUMAN	KIF2A	KIF2A_HUMAN Isoform 4 of Kinesin-like protein KIF2A	17	9.09888	8.71902	9.192	9.31254	6.6851	6.24258	7.10373	6.38159	5.91013	5.50257	6.04029	5.47476	3.54563	4.77184	3.26037	2.75896
sp|P50583|AP4A_HUMAN	NUDT2	AP4A_HUMAN Bis(5'-nucleosyl)-tetraphosphatase [asymmetrical]	9	6.52415	6.81744	6.9782	6.89778	6.87921	6.58728	6.96433	6.59468	7.02738	6.55458	6.90792	6.7454	5.28809	5.0487	4.28505	3.89983
sp|P62851|RS25_HUMAN	RPS25	RS25_HUMAN 40S ribosomal protein S25	22	6.57551	6.84103	5.90236	5.8801	6.24465	5.90988	5.86305	5.85677	5.7704	5.60583	5.69762	5.53991	6.39165	6.36044	7.70542	7.85536
sp|Q8WZA9|IRGQ_HUMAN	IRGQ	IRGQ_HUMAN Immunity-related GTPase family Q protein	13	5.17407	4.70711	5.35048	5.6483	6.02616	6.09195	5.92111	6.0136	6.50796	6.78704	6.04293	6.36382	8.04434	7.13891	7.43807	6.74413
sp|O43524|FOXO3_HUMAN	FOXO3	FOXO3_HUMAN Forkhead box protein O3	4	5.84409	5.78459	5.6393	5.99513	5.72179	5.95604	6.03148	5.8369	6.08414	6.38965	6.29827	6.29269	7.00299	6.98611	6.98566	7.15117
sp|Q9H2Y7|ZN106_HUMAN	ZNF106	ZN106_HUMAN Zinc finger protein 106	2	5.67205	6.09489	4.94689	5.50653	6.08965	5.98612	5.5866	5.65737	6.2862	6.33635	5.42124	6.11742	7.3482	7.36395	7.15842	8.42813
sp|P53041|PPP5_HUMAN	PPP5C	PPP5_HUMAN Serine/threonine-protein phosphatase 5	48	5.08628	5.10486	4.91586	5.23755	5.52141	5.86138	5.33022	5.778	5.51796	6.302	5.9489	6.23698	7.36897	7.73115	8.5954	9.46307
sp|Q9UNQ2|DIM1_HUMAN	DIMT1	DIM1_HUMAN Probable dimethyladenosine transferase	17	7.71887	7.13785	7.70181	7.68866	6.60464	6.09936	6.90647	6.33038	6.50387	6.02134	6.60697	5.95062	5.11148	4.98106	4.78196	3.85467
sp|P78527|PRKDC_HUMAN	PRKDC	PRKDC_HUMAN DNA-dependent protein kinase catalytic subunit	227	10.4211	9.69357	10.4504	10.5612	6.75719	6.48776	7.56826	7.00976	5.39233	5.0357	5.73315	4.96165	2.10929	4.44701	1.83667	1.53489
sp|O95831|AIFM1_HUMAN	AIFM1	AIFM1_HUMAN Apoptosis-inducing factor 1, mitochondrial	41	6.02446	6.21061	5.97691	5.94373	6.05491	6.06805	5.93281	6.01903	6.21699	6.38958	5.84058	6.27459	6.56405	6.55787	6.83699	7.08885
sp|Q13362-5|2A5G_HUMAN	PPP2R5C	2A5G_HUMAN Isoform 5 of Serine/threonine-protein phosphatase 2A 56 kDa regulatory subunit gamma isoform	5	8.14354	8.57714	7.7612	7.60123	7.19663	6.73456	7.05817	6.97829	6.66425	6.32789	6.30902	6.58526	3.72603	4.26863	3.36155	2.70661
sp|Q14738|2A5D_HUMAN	PPP2R5D	2A5D_HUMAN Serine/threonine-protein phosphatase 2A 56 kDa regulatory subunit delta isoform	24	8.48474	8.33235	8.56786	8.5804	6.88707	6.73681	7.34941	6.94841	5.91607	5.62993	6.39949	5.87818	3.60357	4.50577	3.20856	2.97137
sp|Q15172|2A5A_HUMAN	PPP2R5A	2A5A_HUMAN Serine/threonine-protein phosphatase 2A 56 kDa regulatory subunit alpha isoform	9	6.98447	7.42707	7.35286	7.1957	6.83234	6.80804	6.82223	6.58233	6.63653	6.64967	6.64669	6.49659	4.52169	4.99745	4.20305	3.84328
sp|Q16537|2A5E_HUMAN	PPP2R5E	2A5E_HUMAN Serine/threonine-protein phosphatase 2A 56 kDa regulatory subunit epsilon isoform	10	6.90913	7.54233	6.7671	6.95432	6.76784	6.68934	6.70103	6.45873	6.43226	6.24521	6.55687	6.56592	5.03565	5.36414	4.57769	4.43245
sp|Q9UIA9|XPO7_HUMAN	XPO7	XPO7_HUMAN Exportin-7	30	7.87949	7.53561	7.80554	8.07412	6.84013	6.55773	7.08853	6.75645	6.49573	6.21402	6.56778	6.22978	4.19578	4.8272	3.61086	3.32126
sp|Q14978-2|NOLC1_HUMAN	NOLC1	NOLC1_HUMAN Isoform Beta of Nucleolar and coiled-body phosphoprotein 1	39	7.55127	8.11802	7.17193	7.2749	6.23527	6.57321	6.15158	6.48051	5.53635	5.78551	5.68358	5.87677	4.53912	5.67226	5.52562	5.82409
sp|Q14978-3|NOLC1_HUMAN	NOLC1	NOLC1_HUMAN Isoform 3 of Nucleolar and coiled-body phosphoprotein 1	1	5.91718	5.69462	5.41775	5.66513	5.883	7.29187	7.05733	7.29402	6.2252	4.91622	5.64586	6.51116	5.76868	7.12061	6.75532	6.83604
sp|P61201-2|CSN2_HUMAN	COPS2	CSN2_HUMAN Isoform 2 of COP9 signalosome complex subunit 2	25	6.14887	6.52601	6.25429	6.0813	6.98642	6.97473	6.74867	6.61902	6.69487	6.49597	7.11715	6.56912	6.0003	5.30466	5.12961	4.34902
sp|Q5VTQ0|TT39B_HUMAN	TTC39B	TT39B_HUMAN Tetratricopeptide repeat protein 39B	3	7.1945	6.51582	7.89599	7.81518	5.85759	6.7401	6.97548	6.28575	5.82239	6.43689	6.43944	6.71803	4.69991	5.38178	5.05989	4.16127
sp|P55084|ECHB_HUMAN	HADHB	ECHB_HUMAN Trifunctional enzyme subunit beta, mitochondrial	36	5.54147	5.27949	5.50411	5.48078	6.19436	6.41456	6.15838	6.24908	6.3065	6.52726	6.20192	6.26424	7.06716	6.84112	7.06761	6.90194
sp|O00231|PSD11_HUMAN	PSMD11	PSD11_HUMAN 26S proteasome non-ATPase regulatory subunit 11	57	7.01834	6.34958	7.10748	6.77561	7.54594	6.98423	7.88904	7.22446	6.98738	6.18695	7.92943	6.32158	4.93217	4.21425	3.80141	2.73214
sp|Q9BUF5|TBB6_HUMAN	TUBB6	TBB6_HUMAN Tubulin beta-6 chain	52	7.8743	5.98643	8.00807	8.35137	6.95341	6.27992	6.8562	6.56784	6.5081	6.17278	6.27792	6.29036	4.7501	5.15131	4.14311	3.82876
sp|Q13509|TBB3_HUMAN	TUBB3	TBB3_HUMAN Tubulin beta-3 chain	90	8.29897	4.65928	8.41325	8.79706	7.12359	6.78888	7.65113	7.17468	6.21873	6.1342	7.09587	6.19103	3.91634	4.85432	3.53049	3.15216
sp|Q13885|TBB2A_HUMAN	TUBB2A	TBB2A_HUMAN Tubulin beta-2A chain	70	8.04051	7.81238	8.24298	8.44522	6.90674	6.56166	7.11986	6.63529	6.41094	6.05942	6.36871	6.09067	4.07033	4.82601	3.48992	2.91937
sp|P07437|TBB5_HUMAN	TUBB	TBB5_HUMAN Tubulin beta chain	39	8.02501	7.25021	8.21728	7.95465	7.17805	6.44335	7.0911	6.84983	6.84012	5.86167	6.33415	6.16597	4.18963	4.62662	3.59319	3.37917
sp|P68371|TBB4B_HUMAN	TUBB4B	TBB4B_HUMAN Tubulin beta-4B chain	42	8.59762	5.46876	8.83236	8.85648	7.39877	6.67998	7.66958	7.1239	6.4566	6.02663	6.74889	6.04921	3.77495	4.26001	3.33502	2.72125
sp|P04350|TBB4A_HUMAN	TUBB4A	TBB4A_HUMAN Tubulin beta-4A chain	5	8.92664	2.90882	9.03636	9.57594	7.83752	6.86732	8.59571	7.61554	6.45412	6.02705	7.32976	6.15369	2.99733	4.57637	2.95272	2.14511
tr|M0R042|M0R042_HUMAN	TUBB4A	M0R042_HUMAN Tubulin beta-4A chain (Fragment)	1	8.88506	9.72283	6.45951	7.14298	6.11975	5.5045	5.62736	4.69932	6.28556	5.47921	4.94581	6.54913	6.26785	6.08787	5.25452	4.96874
tr|K7ES63|K7ES63_HUMAN	TUBB6	K7ES63_HUMAN Tubulin beta-6 chain (Fragment)	1	7.91162	12.6347	8.18866	8.14404	5.26892	6.56051	5.115	5.44394	6.01868	5.31619	5.5774	6.74424	4.96341	3.4235	4.76289	3.92631
tr|M0QYM7|M0QYM7_HUMAN	TUBB4A	M0QYM7_HUMAN Tubulin beta-4A chain (Fragment)	1	8.18996	10.3412	7.11576	8.02817	7.6674	4.98458	5.75559	5.78981	7.7212	6.32015	4.07342	5.49201	5.4239	4.59852	3.97391	4.52442
sp|Q9H4B7|TBB1_HUMAN	TUBB1	TBB1_HUMAN Tubulin beta-1 chain	28	8.52798	8.21806	8.56409	8.49707	7.13237	6.89433	7.41297	6.99603	6.23579	5.65513	7.01433	5.95006	3.48016	4.13077	2.90073	2.39013
sp|A6NKZ8|YI016_HUMAN		YI016_HUMAN Putative tubulin beta chain-like protein ENSP00000290377	2	11.5206	13.5728	9.92307	11.0832	6.68392	5.17366	4.40493	3.80396	5.04053	4.61553	4.56759	4.67033	3.86839	4.30341	3.89722	2.8709
sp|Q96C11-3|FGGY_HUMAN	FGGY	FGGY_HUMAN Isoform 4 of FGGY carbohydrate kinase domain-containing protein	1	6.72949	5.30351	5.65778	5.85085	5.98654	6.05638	5.33535	6.6952	7.70167	5.26639	5.12867	6.29518	8.46278	6.31601	6.28432	6.92988
sp|Q6PGP7|TTC37_HUMAN	TTC37	TTC37_HUMAN Tetratricopeptide repeat protein 37	20	8.145	7.48644	8.45585	8.24201	6.76224	6.42629	7.23591	6.73375	6.53345	5.94728	6.53675	6.04256	4.06278	4.718	3.50434	3.16736
sp|O76024|WFS1_HUMAN	WFS1	WFS1_HUMAN Wolframin	17	5.96051	6.22543	5.99308	5.98003	6.44373	6.62055	6.31843	6.38811	6.46272	6.80804	6.61755	6.35803	6.41493	6.09544	5.78095	5.53245
sp|Q8TAA9|VANG1_HUMAN	VANGL1	VANG1_HUMAN Vang-like protein 1	9	6.39266	5.4429	6.94828	6.65399	6.84018	6.67881	7.35676	6.6312	7.03811	6.65258	7.16832	6.92354	5.4109	4.98792	4.73011	4.14374
sp|Q8N3Y3|LARG2_HUMAN	GYLTL1B	LARG2_HUMAN Glycosyltransferase-like protein LARGE2	2	8.35098	9.61408	7.31372	7.61035	6.3992	6.28025	6.48908	6.50052	6.02892	6.62054	5.77798	6.41796	4.59424	4.43276	4.04798	3.52145
sp|Q9UJX2|CDC23_HUMAN	CDC23	CDC23_HUMAN Cell division cycle protein 23 homolog	16	8.31171	7.66028	8.39717	8.60975	6.91634	6.64787	7.16553	6.85997	6.33954	6.0862	6.55132	5.94723	4.04973	4.42949	3.14996	2.87791
sp|O95248-4|MTMR5_HUMAN	SBF1	MTMR5_HUMAN Isoform 4 of Myotubularin-related protein 5	10	8.94883	5.78296	9.50061	9.44726	7.41593	6.32409	7.33727	6.6464	6.39373	5.39634	6.26946	5.46895	3.78453	4.74965	3.57596	2.95801
sp|Q9HBH0|RHOF_HUMAN	RHOF	RHOF_HUMAN Rho-related GTP-binding protein RhoF	10	6.91312	6.66991	7.48828	7.32215	6.58702	7.01836	7.1508	7.24797	5.81588	6.14771	6.85446	6.05321	4.73596	5.30547	4.51512	4.1746
sp|Q02083|NAAA_HUMAN	NAAA	NAAA_HUMAN N-acylethanolamine-hydrolyzing acid amidase	4	5.32953	5.26407	5.21875	5.68424	6.24062	5.93372	5.19334	5.74932	6.00022	6.58833	5.64963	6.23557	7.04479	7.56955	7.70452	8.59381
sp|Q16891-4|IMMT_HUMAN	IMMT	IMMT_HUMAN Isoform 4 of Mitochondrial inner membrane protein	41	8.90823	8.95583	8.8017	8.6148	7.00993	6.57801	7.33063	6.8689	6.44306	5.69596	6.312	5.93711	3.37421	4.22589	2.70953	2.23423
sp|Q16891-2|IMMT_HUMAN	IMMT	IMMT_HUMAN Isoform 2 of Mitochondrial inner membrane protein	5	7.02689	5.48908	8.66725	7.53871	6.17976	6.62099	6.52656	7.77429	6.24046	5.61504	6.12939	5.93663	5.70489	4.84954	4.22168	5.47883
sp|P35222|CTNB1_HUMAN	CTNNB1	CTNB1_HUMAN Catenin beta-1	47	5.69397	5.20002	5.67181	5.76759	6.06901	6.47738	6.12389	6.24394	6.2509	6.59079	6.24247	6.35212	6.53876	6.61497	6.95549	7.20689
sp|Q96DX7|TRI44_HUMAN	TRIM44	TRI44_HUMAN Tripartite motif-containing protein 44	6	5.05148	4.44523	5.04761	5.05907	6.07547	5.73172	6.00479	6.09466	6.08906	6.44522	5.99888	6.51173	7.37106	7.67987	7.93436	8.45977
sp|Q9H792|PEAK1_HUMAN	PEAK1	PEAK1_HUMAN Pseudopodium-enriched atypical kinase 1	7	6.88436	6.73369	6.73148	6.49835	6.7925	5.8566	6.04454	5.80791	6.26148	5.86535	6.25566	8.72802	5.49862	5.64065	5.43792	4.96287
sp|P63010-2|AP2B1_HUMAN	AP2B1	AP2B1_HUMAN Isoform 2 of AP-2 complex subunit beta	70	5.94928	5.16704	5.9353	5.90114	6.55055	6.36062	6.49597	6.37192	6.41854	6.48933	6.59773	6.38717	6.84988	6.32267	6.42971	5.77314
sp|Q10567-3|AP1B1_HUMAN	AP1B1	AP1B1_HUMAN Isoform C of AP-1 complex subunit beta-1	44	5.24975	4.51304	4.99249	5.10464	6.34521	6.30355	6.1201	6.16713	6.27839	6.60739	6.32546	6.35361	7.73917	7.033	7.50106	7.366
sp|P63010-3|AP2B1_HUMAN	AP2B1	AP2B1_HUMAN Isoform 3 of AP-2 complex subunit beta	3	5.94817	7.86154	5.59943	5.40169	6.16088	4.71376	5.01349	5.04032	7.38042	6.46341	4.07917	6.01306	8.76708	7.16397	6.97711	7.4165
sp|O15111|IKKA_HUMAN	CHUK	IKKA_HUMAN Inhibitor of nuclear factor kappa-B kinase subunit alpha	22	8.35004	8.17436	8.43672	8.01794	6.9778	6.64389	7.37441	6.71536	6.67711	5.74084	6.74019	6.09813	4.21811	4.49683	3.05694	2.28132
sp|O14920|IKKB_HUMAN	IKBKB	IKKB_HUMAN Inhibitor of nuclear factor kappa-B kinase subunit beta	8	7.82191	8.04268	8.12588	7.75812	7.54506	6.63687	7.33972	6.61623	6.52029	6.19687	6.86119	6.31744	4.19787	3.9276	3.45944	2.63284
sp|Q6KC79|NIPBL_HUMAN	NIPBL	NIPBL_HUMAN Nipped-B-like protein	9	8.33236	8.96746	8.43008	8.56274	6.07711	6.21273	6.18365	5.93525	5.32526	5.36872	5.56967	5.54594	4.29696	5.9647	4.57729	4.65009
sp|Q8NE71|ABCF1_HUMAN	ABCF1	ABCF1_HUMAN ATP-binding cassette sub-family F member 1	32	10.8908	10.9326	10.9505	11.2063	5.97226	5.34098	6.68599	5.947	4.72623	4.22196	4.97376	4.40708	2.82832	5.43466	2.77402	2.70756
sp|P42765|THIM_HUMAN	ACAA2	THIM_HUMAN 3-ketoacyl-CoA thiolase, mitochondrial	11	5.14376	4.33322	4.91877	5.02213	5.64705	6.08409	5.50862	5.69188	5.65557	6.71985	5.97014	6.37887	7.2745	7.61449	8.61542	9.42165
sp|P25787|PSA2_HUMAN	PSMA2	PSA2_HUMAN Proteasome subunit alpha type-2	27	4.53269	4.4722	4.54262	4.90082	5.31214	6.06045	5.30228	5.78816	5.5397	6.77974	5.76568	6.49262	7.43007	7.89784	8.86805	10.3149
sp|Q8WXI9|P66B_HUMAN	GATAD2B	P66B_HUMAN Transcriptional repressor p66-beta	10	6.87569	7.115	7.07941	6.78226	6.78075	6.95593	6.87056	6.75675	6.20609	5.82319	6.97636	6.19375	5.12888	5.20332	4.74112	4.51093
sp|Q86YP4-3|P66A_HUMAN	GATAD2A	P66A_HUMAN Isoform 3 of Transcriptional repressor p66-alpha	14	6.80089	5.84849	7.24486	7.13575	6.89575	6.97143	7.54436	7.33021	6.38392	6.13214	7.04787	6.23932	4.73844	4.97674	4.56687	4.14297
sp|Q86Y07|VRK2_HUMAN	VRK2	VRK2_HUMAN Serine/threonine-protein kinase VRK2	10	8.01048	8.44917	8.26319	8.10321	6.52914	6.42661	6.98848	6.83036	5.72374	5.26945	5.93467	5.59099	4.23906	5.35091	4.5769	3.71363
sp|P46063|RECQ1_HUMAN	RECQL	RECQ1_HUMAN ATP-dependent DNA helicase Q1	29	8.45765	8.05934	8.68979	8.4192	7.28791	6.96886	7.3398	6.86741	6.28446	5.52001	6.35848	5.82569	3.59116	4.30782	3.18386	2.83857
sp|Q07864|DPOE1_HUMAN	POLE	DPOE1_HUMAN DNA polymerase epsilon catalytic subunit A	29	8.5866	8.76494	8.76138	8.77322	6.6304	6.28161	6.7225	6.37925	5.87883	5.39895	6.01887	5.34191	3.83883	5.14064	3.7962	3.68586
sp|P08574|CY1_HUMAN	CYC1	CY1_HUMAN Cytochrome c1, heme protein, mitochondrial	14	7.05222	6.8575	6.69386	6.61698	6.87711	6.63931	7.49533	6.44925	6.10006	6.11924	6.92598	6.1814	5.82109	5.18452	4.53271	4.45342
sp|Q9BV44|THUM3_HUMAN	THUMPD3	THUM3_HUMAN THUMP domain-containing protein 3	18	6.85537	6.70647	6.56705	6.62178	6.94698	6.96545	6.963	6.85913	6.58701	6.47208	6.64532	6.25271	5.30835	5.06776	4.80679	4.37478
sp|Q8TE99|ACPL2_HUMAN	ACPL2	ACPL2_HUMAN Acid phosphatase-like protein 2	2	5.88318	5.75088	5.18275	5.65708	5.86297	6.48233	5.60637	5.53234	5.24402	6.04594	5.38085	5.90987	7.39056	8.07191	7.63451	8.36444
sp|Q8IY81|SPB1_HUMAN	FTSJ3	SPB1_HUMAN pre-rRNA processing protein FTSJ3	18	9.68295	10.18	9.659	9.77208	6.13606	5.77605	6.3961	6.03711	5.25068	4.69451	5.12368	4.77207	3.61377	5.80597	3.65628	3.44366
sp|Q9Y4L1|HYOU1_HUMAN	HYOU1	HYOU1_HUMAN Hypoxia up-regulated protein 1	83	6.33261	6.32423	6.3861	6.28148	6.78196	6.53217	6.72917	6.61673	6.79564	6.50044	6.73637	6.50124	6.13703	5.5048	5.33954	4.50048
tr|J3QL06|J3QL06_HUMAN	HYOU1	J3QL06_HUMAN Hypoxia up-regulated protein 1 (Fragment)	2	4.86674	17.0813	4.96053	4.31483	5.58919	5.49274	5.20096	5.31048	6.55459	6.09688	4.78482	5.7666	7.34135	4.97891	5.82108	5.83905
sp|O00506|STK25_HUMAN	STK25	STK25_HUMAN Serine/threonine-protein kinase 25	8	8.7072	8.21142	8.90261	9.28731	6.52444	6.3928	7.00283	6.52559	6.1097	5.71853	5.94831	5.5543	3.64805	4.86107	3.4928	3.11303
sp|Q9P289|MST4_HUMAN	MST4	MST4_HUMAN Serine/threonine-protein kinase MST4	2	7.88803	7.77199	7.1697	7.80514	6.47292	6.52624	7.01441	6.41481	6.29574	6.27768	6.92038	5.49071	4.79845	5.33049	4.36177	3.46154
sp|Q9Y6E0|STK24_HUMAN	STK24	STK24_HUMAN Serine/threonine-protein kinase 24	16	7.22873	7.87685	7.55064	7.73851	6.68414	6.6255	6.74658	6.79583	6.4931	6.54674	6.57375	6.4043	4.58447	4.86988	3.98858	3.2924
sp|O75146|HIP1R_HUMAN	HIP1R	HIP1R_HUMAN Huntingtin-interacting protein 1-related protein	45	7.30866	6.94829	7.39615	7.32978	7.01996	6.5241	7.16328	6.71305	6.947	6.26808	6.7112	6.45731	4.77536	4.77735	4.20491	3.45551
sp|O00291|HIP1_HUMAN	HIP1	HIP1_HUMAN Huntingtin-interacting protein 1	16	6.95693	6.91912	7.08812	6.84864	6.5666	6.03033	6.62939	6.45602	6.7088	6.26882	6.64976	6.40876	5.44491	5.31412	5.17161	4.53805
sp|Q8ND04-2|SMG8_HUMAN	SMG8	SMG8_HUMAN Isoform 2 of Protein SMG8	27	6.57621	6.93164	7.04962	6.79421	6.5696	6.12926	6.4124	6.10985	6.73078	6.14482	6.67445	6.4604	6.31381	5.38466	5.33771	4.38058
sp|Q8NCN4|RN169_HUMAN	RNF169	RN169_HUMAN E3 ubiquitin-protein ligase RNF169	2	6.39224	6.99065	6.42025	6.42173	6.29134	6.80022	5.82697	6.79091	6.50716	5.62885	6.65291	6.02461	5.50878	6.23327	5.45482	6.05528
sp|Q9UBP6|TRMB_HUMAN	METTL1	TRMB_HUMAN tRNA (guanine-N(7)-)-methyltransferase	7	5.32545	5.71792	5.79716	5.52772	6.0417	5.92226	5.96081	6.13847	6.33513	6.6488	6.43933	6.16909	7.07434	6.36609	7.48811	7.04763
sp|Q86Y37|CACL1_HUMAN	CACUL1	CACL1_HUMAN CDK2-associated and cullin domain-containing protein 1	7	5.64249	5.31091	6.01325	5.77729	6.18583	6.42476	6.39249	6.1745	6.45712	7.00358	6.60939	6.89982	6.36127	6.10804	6.31425	6.32502
sp|Q14244-7|MAP7_HUMAN	MAP7	MAP7_HUMAN Isoform 7 of Ensconsin	12	6.81877	7.55847	6.6896	6.66972	6.10479	6.19039	6.19789	6.22757	5.92891	6.06997	6.40319	6.16961	5.67415	6.11418	5.5066	5.67619
sp|Q8IWC1|MA7D3_HUMAN	MAP7D3	MA7D3_HUMAN MAP7 domain-containing protein 3	11	7.64179	7.67202	7.43319	7.47175	6.01485	6.26911	6.68183	6.25426	5.63447	5.67571	6.24488	6.08819	4.78789	5.69603	5.1742	5.25984
sp|Q3KQU3|MA7D1_HUMAN	MAP7D1	MA7D1_HUMAN MAP7 domain-containing protein 1	6	7.04425	8.80174	7.5674	7.59312	5.97895	5.96407	5.78661	6.5434	6.01928	5.75472	6.05862	5.97455	5.05883	5.48656	4.84883	5.51907
sp|Q9UKV3|ACINU_HUMAN	ACIN1	ACINU_HUMAN Apoptotic chromatin condensation inducer in the nucleus	38	5.92088	6.17198	5.66616	5.81051	5.70412	5.79438	5.45765	5.85288	5.70492	6.03611	5.67884	6.10734	6.90672	7.41267	7.68332	8.09153
sp|Q96GQ7|DDX27_HUMAN	DDX27	DDX27_HUMAN Probable ATP-dependent RNA helicase DDX27	6	9.22706	9.56488	9.10667	9.1459	5.95425	6.02442	6.39125	5.63275	5.68407	4.79681	5.27994	5.24437	4.13724	5.53641	4.16895	4.10502
sp|Q9Y639|NPTN_HUMAN	NPTN	NPTN_HUMAN Neuroplastin	11	5.1471	5.61071	5.24389	5.13621	6.00189	6.10824	5.5661	5.77073	6.04131	5.97494	6.07932	6.42008	7.08902	6.95266	7.99337	8.86444
sp|Q9H9F9|ARP5_HUMAN	ACTR5	ARP5_HUMAN Actin-related protein 5	6	6.81724	6.40267	7.58023	7.69996	6.82741	7.31091	8.56335	7.74011	6.07433	5.91202	7.47624	6.06694	4.39992	4.64964	3.532	2.94702
sp|Q96TA1|NIBL1_HUMAN	FAM129B	NIBL1_HUMAN Niban-like protein 1	25	8.42724	7.53353	8.30194	8.18184	7.39501	6.67347	7.43304	6.90075	6.70626	6.03119	6.47792	5.98789	3.84256	4.35979	3.21674	2.53082
sp|Q96JP5|ZFP91_HUMAN	ZFP91	ZFP91_HUMAN E3 ubiquitin-protein ligase ZFP91	8	6.32083	6.48006	6.60666	6.82227	6.46062	6.11141	5.82603	5.96942	6.39908	6.03244	5.89448	6.0663	6.18088	6.40028	6.34679	6.08246
sp|P51788|CLCN2_HUMAN	CLCN2	CLCN2_HUMAN Chloride channel protein 2	2	8.27242	8.63348	8.23826	7.31066	6.45306	6.14311	6.81151	6.05325	7.06789	6.36984	6.70725	5.89081	4.4762	4.21659	3.9135	3.44219
sp|Q92947|GCDH_HUMAN	GCDH	GCDH_HUMAN Glutaryl-CoA dehydrogenase, mitochondrial	8	7.90032	7.90233	7.89594	7.25925	6.797	6.68022	7.37006	6.10694	6.36285	6.28244	6.7319	6.40799	4.258	4.74869	3.82237	3.47371
sp|Q15181|IPYR_HUMAN	PPA1	IPYR_HUMAN Inorganic pyrophosphatase	58	4.69981	4.75474	4.60382	4.72056	5.63403	6.26443	5.58806	6.11427	5.67061	6.53443	6.17083	6.1955	7.42976	7.71734	8.38651	9.5153
sp|Q9H2U2-2|IPYR2_HUMAN	PPA2	IPYR2_HUMAN Isoform 2 of Inorganic pyrophosphatase 2, mitochondrial	32	5.09254	4.98894	4.98216	4.975	5.96545	6.0846	5.92819	6.04064	6.24084	6.6451	6.2988	6.52564	7.83717	7.08309	7.83092	7.48093
sp|Q15233|NONO_HUMAN	NONO	NONO_HUMAN Non-POU domain-containing octamer-binding protein	22	8.85525	9.04898	8.2311	8.20596	6.19273	5.04261	5.92919	5.14388	6.05903	4.83209	5.59248	5.20741	5.4097	4.95919	6.18234	5.10806
sp|Q8WXF1|PSPC1_HUMAN	PSPC1	PSPC1_HUMAN Paraspeckle component 1	23	7.56448	7.54935	7.36983	7.09403	6.24376	6.00703	6.73316	5.78263	5.85559	5.1148	6.21032	5.09229	5.78178	5.15872	6.9461	5.49612
sp|P35658-5|NU214_HUMAN	NUP214	NU214_HUMAN Isoform 5 of Nuclear pore complex protein Nup214	22	6.76818	7.02709	6.91778	6.82557	6.63224	6.59488	6.59575	6.47545	6.46197	6.54643	6.34437	6.37819	5.63189	5.33031	5.00592	4.46396
sp|P06737|PYGL_HUMAN	PYGL	PYGL_HUMAN Glycogen phosphorylase, liver form	81	6.38825	6.69587	6.3828	6.3007	6.70092	6.37	6.61326	6.46798	6.90378	6.61474	6.71384	6.42675	6.23847	5.50836	5.39994	4.27434
sp|P11216|PYGB_HUMAN	PYGB	PYGB_HUMAN Glycogen phosphorylase, brain form	60	5.67686	5.66988	5.65479	5.5896	6.23806	6.32904	6.29822	6.36645	6.3071	6.68637	6.48918	6.42674	6.90442	6.33331	6.69866	6.33134
sp|P11217|PYGM_HUMAN	PYGM	PYGM_HUMAN Glycogen phosphorylase, muscle form	1	2.45611	3.67547	4.59521	3.27416	5.74253	8.84973	8.82787	8.38285	9.10009	10.3124	9.89449	11.1604	3.52147	3.79328	2.78882	3.62514
sp|Q15120-2|PDK3_HUMAN	PDK3	PDK3_HUMAN Isoform 2 of [Pyruvate dehydrogenase (acetyl-transferring)] kinase isozyme 3, mitochondrial	8	5.94291	5.22823	6.66269	6.2571	6.71007	6.57055	7.48713	6.44355	6.62665	6.69802	7.68905	6.40879	6.49381	5.50846	5.09741	4.17558
sp|Q07820|MCL1_HUMAN	MCL1	MCL1_HUMAN Induced myeloid leukemia cell differentiation protein Mcl-1	5	5.51802	5.94368	5.11453	5.67635	5.67554	5.83648	5.42344	5.5949	5.90894	6.26923	5.44269	6.26676	7.61979	7.34804	7.83817	8.52342
sp|Q92610|ZN592_HUMAN	ZNF592	ZN592_HUMAN Zinc finger protein 592	2	6.16402	6.10608	6.32822	5.98879	5.96254	6.1667	5.93353	5.62711	6.05844	5.91569	6.25627	6.09783	7.02835	6.82146	6.34128	7.20369
sp|Q86XN8-3|MEX3D_HUMAN	MEX3D	MEX3D_HUMAN Isoform 3 of RNA-binding protein MEX3D	7	6.77459	5.76302	6.65208	6.84938	6.93855	6.4082	6.51076	6.37828	6.0847	5.8539	6.61078	6.05299	6.37726	6.14619	5.3148	5.28453
sp|Q5U5Q3|MEX3C_HUMAN	MEX3C	MEX3C_HUMAN RNA-binding E3 ubiquitin-protein ligase MEX3C	3	6.31072	6.55006	6.14659	5.94581	7.01642	7.46259	7.41491	6.51569	6.62055	6.57018	6.47405	5.91452	4.9992	5.75074	5.37104	4.93693
sp|Q6ZN04|MEX3B_HUMAN	MEX3B	MEX3B_HUMAN RNA-binding protein MEX3B	1	5.67235	1.56046	5.61157	6.09972	7.14544	5.59972	6.3072	5.20924	6.16953	5.73003	7.02061	6.60875	7.95314	6.15899	8.53375	8.61953
sp|Q5T6F2|UBAP2_HUMAN	UBAP2	UBAP2_HUMAN Ubiquitin-associated protein 2	16	5.27241	5.14657	5.08576	5.02684	5.75266	5.9981	5.66328	5.71604	5.91736	6.20036	6.11917	6.22974	7.16001	7.23667	8.29301	9.18203
sp|Q7L2J0|MEPCE_HUMAN	MEPCE	MEPCE_HUMAN 7SK snRNA methylphosphate capping enzyme	24	6.19871	6.16875	6.3801	6.16045	6.76703	6.47388	6.84647	6.60613	6.67914	6.3571	6.99423	6.44579	6.2035	5.68933	5.23065	4.79873
sp|P56181-2|NDUV3_HUMAN	NDUFV3	NDUV3_HUMAN Isoform 2 of NADH dehydrogenase [ubiquinone] flavoprotein 3, mitochondrial	20	5.32994	5.30918	5.1799	5.48139	5.069	5.74172	5.18533	5.59406	5.23064	5.93084	5.43784	6.13096	7.40214	8.00999	8.71577	10.2513
sp|Q12965|MYO1E_HUMAN	MYO1E	MYO1E_HUMAN Unconventional myosin-Ie	28	8.84065	8.18258	8.92597	8.84155	7.13077	6.24298	7.39731	6.72159	6.17711	5.51541	6.08956	5.31568	3.3108	4.85154	3.30114	3.15534
sp|Q9HAF1-3|EAF6_HUMAN	MEAF6	EAF6_HUMAN Isoform 3 of Chromatin modification-related protein MEAF6	3	7.16407	7.5851	7.01697	7.13238	6.07181	5.7296	5.7187	6.0022	5.78985	5.70129	5.68339	5.72129	6.09769	6.70673	5.86663	6.01229
sp|Q96T58|MINT_HUMAN	SPEN	MINT_HUMAN Msx2-interacting protein	10	5.34492	6.18252	6.39521	6.10871	5.98522	6.10848	5.88309	6.06209	6.69115	5.9922	6.05133	6.14856	6.91589	6.65988	6.65748	6.81328
sp|Q9BUL5|PHF23_HUMAN	PHF23	PHF23_HUMAN PHD finger protein 23	12	5.06792	5.71701	5.15764	5.29486	5.25951	5.6429	5.01666	5.46729	5.63308	6.05219	5.36113	6.45222	7.62995	8.03106	8.39298	9.82362
sp|Q9NR12|PDLI7_HUMAN	PDLIM7	PDLI7_HUMAN PDZ and LIM domain protein 7	29	5.34515	5.74988	5.17943	5.1395	5.8986	5.94402	5.61245	5.78303	6.01058	6.1825	5.91727	6.14747	7.35551	6.73965	8.4181	8.57686
sp|Q9H3U1|UN45A_HUMAN	UNC45A	UN45A_HUMAN Protein unc-45 homolog A	53	8.29265	6.8262	8.27379	8.39644	7.03982	7.01356	7.64311	7.24391	6.37469	6.19441	6.8648	6.11255	3.58913	4.42599	3.13003	2.57891
sp|P41440|S19A1_HUMAN	SLC19A1	S19A1_HUMAN Folate transporter 1	9	5.9872	6.54368	5.70577	5.65494	6.06734	6.45719	6.37963	6.17595	6.48325	6.55661	6.42883	6.37107	6.30265	6.29434	6.06763	6.52393
sp|P11586|C1TC_HUMAN	MTHFD1	C1TC_HUMAN C-1-tetrahydrofolate synthase, cytoplasmic	75	8.13451	7.06712	8.25876	8.19799	7.1303	7.0219	7.80366	7.26573	6.34987	6.04999	6.90899	5.9242	3.7587	4.35943	3.19297	2.57588
sp|Q6UB35|C1TM_HUMAN	MTHFD1L	C1TM_HUMAN Monofunctional C1-tetrahydrofolate synthase, mitochondrial	54	8.07992	7.87847	8.02601	7.85481	7.27322	6.59869	7.33806	6.88053	6.77435	5.99232	6.55233	5.98639	4.05394	4.45842	3.47436	2.77819
tr|H0Y327|H0Y327_HUMAN	MTHFD1L	H0Y327_HUMAN Monofunctional C1-tetrahydrofolate synthase, mitochondrial (Fragment)	2	7.96472	8.50916	7.64348	7.95394	6.65012	6.30945	7.17483	6.86409	6.47085	5.51311	6.48599	5.76756	4.43881	4.15145	3.74552	4.35691
sp|P37837|TALDO_HUMAN	TALDO1	TALDO_HUMAN Transaldolase	57	6.52923	6.1501	6.43648	6.23272	6.86443	6.45178	6.92188	6.65034	7.13108	6.61003	6.6381	6.67097	5.87243	5.19928	5.04499	4.59617
sp|P06132|DCUP_HUMAN	UROD	DCUP_HUMAN Uroporphyrinogen decarboxylase	18	5.00211	5.5347	4.89926	5.23258	5.60247	5.72117	5.0413	5.7224	5.477	5.9723	5.86691	6.42268	7.40499	7.57507	8.53338	9.99166
sp|Q9NV66|TYW1_HUMAN	TYW1	TYW1_HUMAN tRNA wybutosine-synthesizing protein 1 homolog	11	7.0579	6.45444	6.87816	6.83058	6.4301	6.16818	6.56089	6.36709	6.44176	6.36876	6.2763	5.96546	5.98351	5.82805	5.52331	4.8655
sp|P04075-2|ALDOA_HUMAN	ALDOA	ALDOA_HUMAN Isoform 2 of Fructose-bisphosphate aldolase A	243	4.8236	4.77803	4.70846	4.82914	5.51121	6.2778	5.61793	6.05858	5.59954	6.50756	6.02575	6.41911	7.23451	7.5928	8.31176	9.70421
sp|P04075|ALDOA_HUMAN	ALDOA	ALDOA_HUMAN Fructose-bisphosphate aldolase A	2	5.47125	5.61782	5.27754	5.23268	5.50581	6.02834	5.24566	5.40745	6.09018	5.6292	5.10752	5.84452	7.97798	7.79143	8.47768	9.29494
sp|P09972|ALDOC_HUMAN	ALDOC	ALDOC_HUMAN Fructose-bisphosphate aldolase C	24	5.12903	5.43949	5.02613	5.02612	5.54932	5.94761	5.29562	5.76429	5.71515	6.24404	5.50623	6.234	7.42024	7.69157	8.36106	9.65012
tr|J3QKP5|J3QKP5_HUMAN	ALDOC	J3QKP5_HUMAN Fructose-bisphosphate aldolase C (Fragment)	1	5.89315	3.54206	5.11945	6.40996	4.67251	2.92875	2.96118	3.47772	5.35647	4.77934	3.36937	5.91292	9.41726	10.7634	11.6932	13.7033
sp|Q9NW08|RPC2_HUMAN	POLR3B	RPC2_HUMAN DNA-directed RNA polymerase III subunit RPC2	13	8.70699	8.62613	8.2504	7.88592	6.69866	6.2065	7.29771	6.47884	6.49071	5.56176	6.46474	5.65952	4.1049	4.56131	3.7131	3.29284
sp|O60232|SSA27_HUMAN	SSSCA1	SSA27_HUMAN Sjoegren syndrome/scleroderma autoantigen 1	15	5.39652	5.82894	5.34977	5.3605	6.2801	6.71801	6.0733	6.46136	5.87056	6.90216	6.68275	7.06204	7.40963	6.13457	4.394	8.07578
sp|O75449|KTNA1_HUMAN	KATNA1	KTNA1_HUMAN Katanin p60 ATPase-containing subunit A1	4	7.30209	7.34632	7.37465	7.64601	6.5116	6.58379	6.68461	6.59032	6.04421	6.34912	6.53483	6.00355	4.65061	5.45534	4.49582	4.42711
sp|Q13952|NFYC_HUMAN	NFYC	NFYC_HUMAN Nuclear transcription factor Y subunit gamma	13	5.45859	5.5158	5.66603	5.7692	5.93444	6.20878	6.27203	6.00043	6.71525	7.14781	6.68715	6.72037	6.82589	6.48415	6.54706	6.04702
sp|Q16134|ETFD_HUMAN	ETFDH	ETFD_HUMAN Electron transfer flavoprotein-ubiquinone oxidoreductase, mitochondrial	17	5.0863	4.98433	5.05485	5.02055	5.98704	6.03965	5.61604	5.80632	6.27968	6.40853	6.01032	6.44327	7.71285	7.25608	7.91076	8.38342
sp|Q9H4L5-2|OSBL3_HUMAN	OSBPL3	OSBL3_HUMAN Isoform 1b of Oxysterol-binding protein-related protein 3	27	7.21201	6.7835	7.46609	7.4654	6.86199	6.49443	7.04444	6.71083	7.3374	6.74947	6.98095	6.4221	4.85868	4.64521	3.80103	3.16645
sp|Q9BZF3-5|OSBL6_HUMAN	OSBPL6	OSBL6_HUMAN Isoform 5 of Oxysterol-binding protein-related protein 6	21	6.15578	7.85805	6.53147	6.22467	6.32011	6.13176	6.56274	6.05542	6.48835	6.20321	6.19877	6.04047	6.1704	6.06181	5.69875	5.29825
sp|Q7Z5K2-3|WAPL_HUMAN	WAPAL	WAPL_HUMAN Isoform 3 of Wings apart-like protein homolog	35	7.55084	7.40712	7.67207	7.86396	6.58027	6.5336	6.98446	6.59401	6.18864	6.27869	6.49779	6.13061	4.45562	5.03052	4.37473	3.85708
sp|P62910|RL32_HUMAN	RPL32	RL32_HUMAN 60S ribosomal protein L32	22	6.91811	6.84249	6.77442	6.85992	5.86755	6.37257	6.39475	6.24005	5.46322	5.56229	6.22476	5.54374	5.41614	6.18287	6.68822	6.64889
sp|P19367-3|HXK1_HUMAN	HK1	HXK1_HUMAN Isoform 3 of Hexokinase-1	43	7.42662	6.93485	7.56564	7.34162	7.3341	6.77879	7.33037	6.93117	7.09218	6.48803	7.11809	6.30107	4.40652	4.32607	3.63983	2.98504
sp|P52789|HXK2_HUMAN	HK2	HXK2_HUMAN Hexokinase-2	21	7.54135	7.24065	7.88318	7.75319	6.74969	6.55339	7.01638	6.67842	6.60245	6.26829	6.6056	6.30774	4.63002	4.84519	3.91612	3.40835
sp|P09622|DLDH_HUMAN	DLD	DLDH_HUMAN Dihydrolipoyl dehydrogenase, mitochondrial	60	5.03455	5.15684	4.93489	5.23436	5.50815	5.88925	5.45206	5.71308	5.57913	6.37947	5.81888	6.18178	7.35356	7.8707	8.45041	9.44289
sp|Q9NZL4|HPBP1_HUMAN	HSPBP1	HPBP1_HUMAN Hsp70-binding protein 1	18	5.56632	4.78864	5.77271	5.70538	6.48975	6.67824	6.3223	6.37111	6.87378	7.13144	6.77177	6.7119	6.57813	6.21281	6.11095	5.91476
tr|K7EL16|K7EL16_HUMAN	HSPBP1	K7EL16_HUMAN Hsp70-binding protein 1 (Fragment)	1	5.24057	5.60125	5.69488	4.03982	7.34652	5.06719	4.49467	5.45	5.73363	7.21937	4.53415	6.02124	8.1638	8.71585	7.7576	8.91947
sp|Q15788|NCOA1_HUMAN	NCOA1	NCOA1_HUMAN Nuclear receptor coactivator 1	6	4.95841	5.47445	5.23636	5.50361	5.32013	5.85076	5.17384	5.46609	5.77186	6.43062	5.76475	6.42316	7.44413	7.71752	8.215	9.24931
sp|O75071|EFC14_HUMAN	EFCAB14	EFC14_HUMAN EF-hand calcium-binding domain-containing protein 14	6	5.05379	5.20341	4.98355	5.29045	5.04145	5.51718	5.1965	5.81473	5.80681	6.26907	5.87053	6.23552	7.55649	7.86307	8.46739	9.83004
sp|O14492|SH2B2_HUMAN	SH2B2	SH2B2_HUMAN SH2B adapter protein 2	1	6.93424	7.19296	7.06337	6.47104	6.76149	6.77375	6.5786	6.69531	6.6317	6.50739	6.57473	6.61317	5.0071	4.8508	5.16168	4.18267
sp|Q9NRF2|SH2B1_HUMAN	SH2B1	SH2B1_HUMAN SH2B adapter protein 1	5	6.36647	7.05713	6.112	6.67899	6.38458	6.63787	6.16114	6.37958	6.31286	6.48725	6.35308	5.98393	5.77285	6.00786	5.68132	5.6231
sp|Q68CQ4|DIEXF_HUMAN	DIEXF	DIEXF_HUMAN Digestive organ expansion factor homolog	12	7.14449	6.11077	7.32003	7.06264	7.13756	6.39175	6.94661	7.0482	7.16426	6.70935	7.32252	6.80812	4.52723	5.09242	3.22459	3.98945
sp|P07942|LAMB1_HUMAN	LAMB1	LAMB1_HUMAN Laminin subunit beta-1	34	5.18502	5.73071	5.15385	5.1752	5.51534	5.94192	5.35022	5.61372	5.97295	6.31197	5.65843	6.5424	7.11728	7.48794	8.03873	9.2043
sp|P05455|LA_HUMAN	SSB	LA_HUMAN Lupus La protein	48	5.02199	5.06262	4.7754	4.86282	5.74522	5.91328	5.40985	5.72982	6.12792	6.54477	5.54677	6.35726	7.78667	7.5659	8.41153	9.13818
tr|M0QXZ5|M0QXZ5_HUMAN	ZNF428	M0QXZ5_HUMAN Zinc finger protein 428 (Fragment)	5	4.91498	7.53505	5.1115	5.03669	5.47278	5.51825	4.84746	5.58522	5.82436	6.12623	5.44894	6.60242	7.26626	7.47139	7.92235	9.31611
sp|Q8TDY4|ASAP3_HUMAN	ASAP3	ASAP3_HUMAN Arf-GAP with SH3 domain, ANK repeat and PH domain-containing protein 3	1	5.39989	7.7425	5.83436	6.18284	5.68617	5.32251	5.14106	4.73939	6.73486	5.86928	5.05187	6.0774	7.33928	7.31112	6.74989	8.81757
sp|Q9NUU7|DD19A_HUMAN	DDX19A	DD19A_HUMAN ATP-dependent RNA helicase DDX19A	36	7.77648	5.95605	7.78652	7.65424	7.47108	7.11588	7.71942	7.21126	6.65964	6.26624	6.9426	6.16383	4.30082	4.46791	3.54323	2.96481
sp|Q5VIR6-4|VPS53_HUMAN	VPS53	VPS53_HUMAN Isoform 4 of Vacuolar protein sorting-associated protein 53 homolog	15	8.71901	8.88279	8.91403	9.12365	6.85977	6.52385	6.98791	6.65344	6.07046	5.57682	6.25152	5.55913	3.41346	4.58799	3.00149	2.87469
sp|Q8IVM0-2|CCD50_HUMAN	CCDC50	CCD50_HUMAN Isoform 2 of Coiled-coil domain-containing protein 50	9	6.0333	7.30902	5.34659	5.26482	5.66359	5.31634	5.00187	5.25849	6.25853	6.04087	5.02075	5.92109	7.43274	7.18508	8.05079	8.89612
sp|Q6NXR4|TTI2_HUMAN	TTI2	TTI2_HUMAN TELO2-interacting protein 2	5	8.81941	7.43365	8.18181	7.98718	7.31848	6.55891	6.82164	6.78414	6.11442	6.12419	6.36366	6.0294	3.7316	4.7295	3.70579	3.29622
sp|Q96I24|FUBP3_HUMAN	FUBP3	FUBP3_HUMAN Far upstream element-binding protein 3	34	5.18079	5.63392	4.9823	5.12921	5.62267	5.70685	5.40283	5.55431	5.71456	6.07989	5.77162	6.04284	7.55597	7.53743	8.83926	9.24555
sp|Q92945|FUBP2_HUMAN	KHSRP	FUBP2_HUMAN Far upstream element-binding protein 2	107	4.96967	5.67374	4.76828	4.95572	5.45762	5.72986	5.10193	5.60611	5.78524	6.21834	5.58859	6.35533	7.56988	7.77012	8.56125	9.88831
sp|Q96AE4-2|FUBP1_HUMAN	FUBP1	FUBP1_HUMAN Isoform 2 of Far upstream element-binding protein 1	68	4.88493	5.46426	4.67724	4.90487	5.38291	5.62832	5.05729	5.60646	5.55509	6.2614	5.49195	6.29248	7.63874	8.12129	8.9451	10.0877
sp|Q96AE4|FUBP1_HUMAN	FUBP1	FUBP1_HUMAN Far upstream element-binding protein 1	3	3.82524	5.67786	4.72484	4.87448	5.52579	7.1024	5.75317	6.23681	6.11113	6.52386	7.14574	6.28617	6.63424	7.34315	8.09653	8.13859
sp|Q9NR56-5|MBNL1_HUMAN	MBNL1	MBNL1_HUMAN Isoform 5 of Muscleblind-like protein 1	1	3.88126	1.2474	5.77601	4.64438	5.30059	8.17372	6.80851	7.92486	6.12511	6.73861	7.21435	6.55094	6.59575	7.64766	7.23111	8.13974
sp|Q9NR56|MBNL1_HUMAN	MBNL1	MBNL1_HUMAN Muscleblind-like protein 1	24	5.17363	5.2753	4.97915	5.29039	5.4916	5.84517	5.42627	5.64833	5.58732	6.15828	5.96841	6.29273	7.33944	7.83683	8.37311	9.31404
sp|Q5VZF2|MBNL2_HUMAN	MBNL2	MBNL2_HUMAN Muscleblind-like protein 2	1	4.87173	5.4914	5.24993	4.67195	5.32239	5.2781	5.33353	6.12489	6.12699	6.27688	6.17736	6.07667	6.61364	7.07325	9.79107	9.5202
sp|Q9UKY7|CDV3_HUMAN	CDV3	CDV3_HUMAN Protein CDV3 homolog	19	4.8536	4.80196	4.92023	4.99402	5.4417	5.99084	5.38604	5.66078	5.66742	6.3876	5.96469	6.24294	7.43229	7.76895	8.58186	9.90506
sp|O00116|ADAS_HUMAN	AGPS	ADAS_HUMAN Alkyldihydroxyacetonephosphate synthase, peroxisomal	39	6.86139	6.8973	7.09763	6.69369	7.23891	6.70394	7.37381	6.76833	7.2149	6.35599	7.40198	6.24645	5.25481	4.73629	4.02593	3.12864
sp|O00154-7|BACH_HUMAN	ACOT7	BACH_HUMAN Isoform 7 of Cytosolic acyl coenzyme A thioester hydrolase	28	5.89795	5.6592	5.97266	5.65236	6.47723	6.58033	6.68597	6.52366	6.81646	6.71169	6.62723	6.44268	6.36689	5.88048	5.89213	5.81308
sp|Q96HY6|DDRGK_HUMAN	DDRGK1	DDRGK_HUMAN DDRGK domain-containing protein 1	5	5.28313	5.3284	5.51914	5.51579	5.82538	5.70557	5.27852	5.80764	6.09433	6.43863	5.90141	6.51997	6.92587	7.43137	7.43458	8.99026
sp|Q9BSJ2-4|GCP2_HUMAN	TUBGCP2	GCP2_HUMAN Isoform 3 of Gamma-tubulin complex component 2	26	8.68805	8.89322	8.84564	8.93038	6.93328	6.69074	7.27577	6.71198	6.35001	5.69588	6.41889	5.9877	3.22661	4.13206	2.83151	2.38828
sp|P13861|KAP2_HUMAN	PRKAR2A	KAP2_HUMAN cAMP-dependent protein kinase type II-alpha regulatory subunit	17	5.80612	5.92591	5.88898	5.60578	6.61824	6.19445	6.53165	6.19493	7.0138	6.82107	6.63351	6.53622	7.53453	6.03443	5.91597	4.74443
sp|P31323|KAP3_HUMAN	PRKAR2B	KAP3_HUMAN cAMP-dependent protein kinase type II-beta regulatory subunit	7	5.90197	6.87828	6.35438	6.1922	6.24378	5.97556	6.59434	6.07648	6.87046	6.72753	6.68201	6.11268	6.80622	5.61024	5.83479	5.13907
sp|Q9C004|SPY4_HUMAN	SPRY4	SPY4_HUMAN Protein sprouty homolog 4	12	4.93706	5.69481	5.18238	5.24421	5.44907	5.79216	5.34818	5.70449	5.72858	6.26849	5.78874	6.28032	7.46472	7.48479	8.40307	9.22894
sp|P10412|H14_HUMAN	HIST1H1E	H14_HUMAN Histone H1.4	21	7.35593	7.13054	6.97347	7.22042	5.70168	5.54917	5.83334	5.59288	5.65425	5.38822	5.63806	5.59267	5.93852	6.77511	6.91433	6.74141
sp|Q5SNT6|FA21B_HUMAN	FAM21B	FA21B_HUMAN WASH complex subunit FAM21B	3	5.6058	6.46389	5.74087	6.73857	5.85499	6.0789	5.92648	7.04004	6.08518	6.07217	5.03156	6.24813	6.67084	6.54376	7.16934	6.72949
sp|Q9Y4E1-4|FA21C_HUMAN	FAM21C	FA21C_HUMAN Isoform 4 of WASH complex subunit FAM21C	25	6.29115	6.69761	6.23439	6.54975	6.4618	6.36661	6.17954	6.28258	6.2898	6.25084	6.52256	6.44407	5.85979	5.70563	6.04893	5.81494
sp|Q13907-2|IDI1_HUMAN	IDI1	IDI1_HUMAN Isoform 2 of Isopentenyl-diphosphate Delta-isomerase 1	14	4.67956	4.30352	4.52979	5.23337	5.13657	5.51463	4.79707	5.52845	5.51535	6.4146	5.47267	6.13219	8.0098	8.79485	9.59316	10.3444
sp|P09525|ANXA4_HUMAN	ANXA4	ANXA4_HUMAN Annexin A4	29	6.51874	6.25218	6.64218	6.49575	7.17708	6.62639	7.04608	6.66608	7.49517	7.02955	7.2658	6.87581	5.86609	4.89831	4.27752	2.86728
sp|P08758|ANXA5_HUMAN	ANXA5	ANXA5_HUMAN Annexin A5	76	7.19199	5.76277	7.12082	7.15002	7.36354	7.06257	7.62451	7.32994	7.1369	6.81227	7.46991	6.6377	4.35843	4.42445	3.66019	2.89399
sp|P26640|SYVC_HUMAN	VARS	SYVC_HUMAN Valine--tRNA ligase	102	7.30117	7.36806	7.31642	7.20992	7.08333	6.47292	7.02732	6.68485	6.90577	6.26941	6.79551	6.19116	4.90042	4.77366	4.10967	3.5904
sp|Q8TEQ6|GEMI5_HUMAN	GEMIN5	GEMI5_HUMAN Gem-associated protein 5	50	10.1792	10.2843	10.3026	10.3135	6.51783	6.47201	6.87241	6.67959	5.27251	4.84565	5.47152	5.06432	2.66571	4.43912	2.41014	2.20969
sp|O00192|ARVC_HUMAN	ARVCF	ARVC_HUMAN Armadillo repeat protein deleted in velo-cardio-facial syndrome	8	8.13678	7.01862	8.13229	8.47658	6.63648	6.45326	7.08114	6.88666	6.09466	5.83842	6.34586	6.16598	4.26068	4.88441	3.99357	3.59462
sp|P23588|IF4B_HUMAN	EIF4B	IF4B_HUMAN Eukaryotic translation initiation factor 4B	53	6.81783	5.82123	6.58451	6.12392	6.27281	5.34066	6.20689	5.44869	6.11009	4.99541	6.14008	5.08004	7.09048	5.44854	9.22097	7.29785
sp|A8MXV4|NUD19_HUMAN	NUDT19	NUD19_HUMAN Nucleoside diphosphate-linked moiety X motif 19, mitochondrial	15	5.41511	4.47345	5.60616	5.67774	6.3713	6.30808	6.29265	6.43653	6.16083	6.46674	7.04671	6.44938	6.90839	6.83716	7.23694	6.31281
sp|Q92538|GBF1_HUMAN	GBF1	GBF1_HUMAN Golgi-specific brefeldin A-resistance guanine nucleotide exchange factor 1	53	8.18987	7.00173	7.60316	8.13677	6.75959	5.86753	6.32606	6.14769	6.56695	6.01425	6.09208	6.04677	5.17274	5.39542	4.48715	4.19225
sp|O96007|MOC2B_HUMAN	MOCS2	MOC2B_HUMAN Molybdopterin synthase catalytic subunit	6	4.90861	5.75152	4.94779	4.79965	5.44966	5.96013	5.29121	5.51552	5.90954	6.11199	5.40672	5.86955	7.93797	7.65166	8.63306	9.85542
sp|Q08378|GOGA3_HUMAN	GOLGA3	GOGA3_HUMAN Golgin subfamily A member 3	56	4.95653	5.14893	5.1086	5.08223	5.85406	6.32331	5.9017	6.10226	5.9978	6.38128	6.36747	6.40817	7.0687	6.96005	8.05999	8.27891
sp|Q96N66|MBOA7_HUMAN	MBOAT7	MBOA7_HUMAN Lysophospholipid acyltransferase 7	9	8.28505	8.5579	8.27246	8.32363	6.62203	6.59211	7.42802	7.01082	6.48854	5.96986	6.60295	6.08448	3.73566	4.36149	3.10596	2.55904
sp|O14521|DHSD_HUMAN	SDHD	DHSD_HUMAN Succinate dehydrogenase [ubiquinone] cytochrome b small subunit, mitochondrial	1	4.72106	2.48886	5.46455	5.16251	9.18037	7.42426	7.31137	7.19547	5.34638	5.90606	7.56883	7.56626	7.22152	5.64894	5.95954	5.83405
sp|Q96NL6|SCLT1_HUMAN	SCLT1	SCLT1_HUMAN Sodium channel and clathrin linker 1	6	6.19763	6.70726	6.04604	6.07125	6.34063	6.07393	6.07066	6.11269	6.91399	6.24233	6.14722	6.03856	7.43493	6.25185	6.29186	5.05916
sp|Q9UHL4|DPP2_HUMAN	DPP7	DPP2_HUMAN Dipeptidyl peptidase 2	15	5.33984	5.29507	5.33017	5.3389	5.6954	5.93426	5.67543	5.71482	5.92798	6.29307	6.25071	6.33111	6.98	7.20732	8.01462	8.67131
sp|Q9Y5Y5-2|PEX16_HUMAN	PEX16	PEX16_HUMAN Isoform 2 of Peroxisomal membrane protein PEX16	4	8.41938	8.95678	8.66636	8.23279	7.40517	6.57152	6.8998	5.92554	5.87402	4.82306	5.43066	5.25905	4.68267	4.22584	3.80072	4.82665
sp|Q9NZM1-6|MYOF_HUMAN	MYOF	MYOF_HUMAN Isoform 6 of Myoferlin	182	6.63568	6.7644	6.62275	6.48633	7.02883	6.61914	7.0185	6.73689	7.09543	6.68422	7.05714	6.57084	5.76209	4.9572	4.43312	3.52746
sp|Q8IYJ3|SYTL1_HUMAN	SYTL1	SYTL1_HUMAN Synaptotagmin-like protein 1	2	6.26972	6.48935	6.60425	6.20187	5.91456	5.56956	6.38218	5.60218	6.22233	6.2592	6.73099	7.4739	6.31887	5.99284	5.94431	6.02388
sp|O15439|MRP4_HUMAN	ABCC4	MRP4_HUMAN Multidrug resistance-associated protein 4	25	7.14917	16.1816	7.22327	6.56346	6.1418	6.07233	6.39126	6.17313	6.03978	5.50165	5.99355	5.61087	4.05895	4.28432	3.58012	3.03479
sp|O15127|SCAM2_HUMAN	SCAMP2	SCAM2_HUMAN Secretory carrier-associated membrane protein 2	4	4.51689	5.01515	4.50923	5.02652	5.49508	5.66546	5.39367	5.86986	5.11506	7.39328	6.63425	6.88948	7.4321	7.68243	8.23296	9.12858
tr|H3BUB6|H3BUB6_HUMAN	SCAMP2	H3BUB6_HUMAN Secretory carrier-associated membrane protein 2 (Fragment)	2	6.59471	2.82982	6.44906	6.97789	6.34278	4.29963	4.35842	4.76106	6.559	5.16926	4.40168	6.4264	7.4191	8.18845	8.30827	10.9145
sp|Q9C0C2|TB182_HUMAN	TNKS1BP1	TB182_HUMAN 182 kDa tankyrase-1-binding protein	40	5.79452	5.88928	5.69304	5.69588	5.9132	6.04782	5.87568	5.90629	6.03633	6.11456	6.29949	6.13512	7.02938	6.44137	7.76492	7.36314
sp|Q9Y446|PKP3_HUMAN	PKP3	PKP3_HUMAN Plakophilin-3	19	8.93023	9.13809	8.75537	8.95482	6.32733	6.32289	6.75448	6.54606	5.33795	5.45415	6.03763	5.56932	3.78226	5.14525	3.57437	3.3698
sp|A2RU67|K1467_HUMAN	KIAA1467	K1467_HUMAN Uncharacterized protein KIAA1467	4	5.8338	7.39579	5.9574	5.65391	5.61286	6.20887	6.34729	6.22315	6.18948	6.11882	6.13684	6.60612	6.38847	6.41366	5.97605	6.93748
sp|Q66K74|MAP1S_HUMAN	MAP1S	MAP1S_HUMAN Microtubule-associated protein 1S	21	7.66252	6.63789	7.8738	7.74233	6.65733	7.04227	7.80953	7.17577	6.29209	6.25304	7.07157	6.26999	4.08274	4.62793	3.58666	3.21455
sp|O95071|UBR5_HUMAN	UBR5	UBR5_HUMAN E3 ubiquitin-protein ligase UBR5	49	8.18719	8.24244	8.33223	8.34195	6.59234	6.59613	6.95795	6.72159	6.33588	5.88433	6.44882	6.12893	3.86344	4.70875	3.50022	3.1578
sp|Q9NRF9|DPOE3_HUMAN	POLE3	DPOE3_HUMAN DNA polymerase epsilon subunit 3	4	5.34907	5.15923	4.62976	4.36544	6.54141	5.42945	5.59136	5.95489	5.44654	5.72084	5.42982	8.11235	7.18462	8.03117	8.11295	8.9411
sp|P06746|DPOLB_HUMAN	POLB	DPOLB_HUMAN DNA polymerase beta	15	6.69826	6.68791	6.71806	6.48346	7.24998	6.39967	6.93329	6.49725	7.17555	6.46528	6.86953	6.34529	6.43433	5.20011	4.72996	3.11206
sp|O95470|SGPL1_HUMAN	SGPL1	SGPL1_HUMAN Sphingosine-1-phosphate lyase 1	17	8.04281	7.75842	8.11942	7.78875	6.67878	6.9086	7.13739	6.94354	6.17149	6.10294	6.37716	5.8861	4.17372	5.05127	3.6209	3.2387
sp|Q9Y3F4|STRAP_HUMAN	STRAP	STRAP_HUMAN Serine-threonine kinase receptor-associated protein	82	5.06453	5.28986	5.21858	4.96717	6.00104	6.01562	5.63714	5.88	6.31201	6.70038	5.95475	6.7079	7.43075	7.25675	7.559	8.00452
sp|Q9UJA5|TRM6_HUMAN	TRMT6	TRM6_HUMAN tRNA (adenine(58)-N(1))-methyltransferase non-catalytic subunit TRM6	12	6.38755	7.25989	6.55345	6.41428	6.46817	6.1509	6.14925	6.07326	6.74139	6.37518	6.3991	6.3202	6.26524	6.11669	5.52118	4.80426
sp|Q13263|TIF1B_HUMAN	TRIM28	TIF1B_HUMAN Transcription intermediary factor 1-beta	128	6.0376	5.3981	5.99377	6.01764	6.68341	6.60645	6.64309	6.61257	6.82588	6.74761	6.76776	6.67794	6.44681	5.72312	5.7482	5.07005
sp|Q6WCQ1-2|MPRIP_HUMAN	MPRIP	MPRIP_HUMAN Isoform 2 of Myosin phosphatase Rho-interacting protein	18	6.58202	5.83752	6.77307	6.81502	6.40294	6.22659	6.56336	6.32623	6.49795	6.07418	6.5092	6.1629	5.94467	5.88119	5.78176	5.62139
tr|H0Y2S9|H0Y2S9_HUMAN	MPRIP	H0Y2S9_HUMAN Myosin phosphatase Rho-interacting protein (Fragment)	3	7.85946	7.73322	6.87791	7.40071	6.54268	6.54353	6.53263	6.2081	6.49946	6.00486	5.95011	6.5708	5.11207	5.52589	3.99138	4.6472
sp|Q9H2D6|TARA_HUMAN	TRIOBP	TARA_HUMAN TRIO and F-actin-binding protein	23	7.08148	6.68412	7.20865	7.16726	6.83843	6.50425	6.83155	6.63617	6.68281	5.99119	6.67793	6.26873	5.10347	5.19265	4.83873	4.29258
sp|Q6P1J9|CDC73_HUMAN	CDC73	CDC73_HUMAN Parafibromin	32	7.77916	6.87632	7.93289	8.19454	6.71319	6.29829	6.99546	6.80303	6.5146	6.18023	6.50051	5.73025	4.51243	5.3009	4.17321	3.495
sp|Q02952|AKA12_HUMAN	AKAP12	AKA12_HUMAN A-kinase anchor protein 12	217	5.06711	4.89203	4.88406	5.10686	5.70799	5.94436	5.43553	5.77257	5.85738	6.34983	5.83849	6.44616	7.43173	7.47186	8.37808	9.41594
sp|P55263|ADK_HUMAN	ADK	ADK_HUMAN Adenosine kinase	34	4.81677	4.75603	4.94713	4.89185	5.4626	5.68511	5.34077	5.70162	5.78923	6.34549	5.91456	6.31365	7.99625	7.90563	9.14799	8.98531
sp|Q92747|ARC1A_HUMAN	ARPC1A	ARC1A_HUMAN Actin-related protein 2/3 complex subunit 1A	14	5.09906	4.59133	5.10949	5.33655	5.55673	5.95755	5.50896	5.79053	5.68578	6.40212	5.82026	6.14522	7.83843	7.65715	8.42878	9.07206
sp|O15143|ARC1B_HUMAN	ARPC1B	ARC1B_HUMAN Actin-related protein 2/3 complex subunit 1B	28	5.48309	3.22955	5.44659	6.00613	6.2106	6.20577	5.99726	6.19964	5.53369	6.32876	6.71537	6.21297	6.89843	7.11253	8.23983	8.17979
sp|Q9HCC0|MCCB_HUMAN	MCCC2	MCCB_HUMAN Methylcrotonoyl-CoA carboxylase beta chain, mitochondrial	19	5.54746	5.48384	5.6692	5.92024	5.8767	6.15086	6.10195	6.04048	6.0532	6.31753	6.37949	6.23814	6.71678	6.78577	7.19938	7.51898
sp|Q8IYB7|DI3L2_HUMAN	DIS3L2	DI3L2_HUMAN DIS3-like exonuclease 2	35	7.60877	7.56238	7.67679	7.46345	7.19527	6.56856	7.25994	6.71568	6.82131	5.93646	6.6182	6.32298	4.61529	4.56471	3.73653	3.33367
sp|Q96GQ5|CP058_HUMAN	C16orf58	CP058_HUMAN UPF0420 protein C16orf58	7	7.45939	5.85957	7.59824	7.5503	7.07274	6.40309	7.15513	6.84476	6.95201	6.08461	6.64908	6.47918	5.01623	5.23224	4.03861	3.6048
sp|Q15003|CND2_HUMAN	NCAPH	CND2_HUMAN Condensin complex subunit 2	27	8.79636	8.04527	8.79193	8.95206	6.75802	6.87665	7.57828	7.20181	6.30908	5.8671	6.53596	6.04964	3.16597	4.14894	2.71996	2.20297
sp|Q14683|SMC1A_HUMAN	SMC1A	SMC1A_HUMAN Structural maintenance of chromosomes protein 1A	70	8.56165	8.89682	8.52282	8.49407	6.9447	6.76227	7.26875	6.79864	6.24973	5.67166	6.4022	5.92722	3.34516	4.22691	3.28751	2.63991
sp|P53365|ARFP2_HUMAN	ARFIP2	ARFP2_HUMAN Arfaptin-2	15	4.4176	4.77793	4.66761	4.95469	5.55077	6.50247	5.91365	6.31752	5.69748	6.99736	6.37734	6.35091	7.37495	7.43614	8.08809	8.57548
sp|Q53H96|P5CR3_HUMAN	PYCRL	P5CR3_HUMAN Pyrroline-5-carboxylate reductase 3	12	5.29863	5.11594	5.46859	5.52145	6.13798	6.1826	6.13571	6.09413	6.23175	6.38146	6.58134	6.22172	6.83865	6.70591	7.71429	7.36984
sp|O95900|TRUB2_HUMAN	TRUB2	TRUB2_HUMAN Probable tRNA pseudouridine synthase 2	11	6.36238	6.28805	7.22137	6.85983	6.71072	6.55429	6.92214	6.67962	6.59494	6.23979	6.79048	6.1325	5.38323	5.60537	5.04755	4.60775
sp|Q96GG9|DCNL1_HUMAN	DCUN1D1	DCNL1_HUMAN DCN1-like protein 1	14	5.06357	3.98645	5.10392	5.12677	5.74712	6.01575	5.81498	5.83919	5.86482	6.42652	6.126	6.75869	7.6656	7.79258	8.12576	8.54226
tr|C9JVE2|C9JVE2_HUMAN	DCUN1D1	C9JVE2_HUMAN DCN1-like protein	1	4.67745	1.67445	4.77612	4.52414	5.46891	5.99415	5.36019	6.05659	6.64434	7.20096	5.22058	5.54308	8.03008	9.38474	10.2849	9.15929
sp|P80303-2|NUCB2_HUMAN	NUCB2	NUCB2_HUMAN Isoform 2 of Nucleobindin-2	21	5.05274	5.50229	4.99026	4.96714	5.51564	5.86669	5.49388	5.67743	5.7856	6.35317	5.85653	6.35179	7.32387	7.57304	8.29084	9.39909
tr|M0QZL9|M0QZL9_HUMAN	LSR	M0QZL9_HUMAN Lipolysis-stimulated lipoprotein receptor (Fragment)	1	6.23177	7.0895	7.93532	5.89479	8.19468	6.07114	6.08798	7.0157	7.07346	5.58622	5.08218	6.45425	4.57736	4.10787	5.2656	7.33219
sp|Q86X29|LSR_HUMAN	LSR	LSR_HUMAN Lipolysis-stimulated lipoprotein receptor	13	5.1949	5.64601	4.88841	5.13707	5.62564	5.89655	5.39942	5.60022	5.78054	6.28085	5.59765	6.40354	7.47039	7.48527	8.26497	9.32856
sp|Q86X29-3|LSR_HUMAN	LSR	LSR_HUMAN Isoform 3 of Lipolysis-stimulated lipoprotein receptor	1	5.25381	5.17515	5.0586	4.93885	5.90653	5.64066	5.2598	5.83869	5.46366	6.1563	6.03454	5.89348	7.0551	8.38078	8.44698	9.49708
sp|Q14204|DYHC1_HUMAN	DYNC1H1	DYHC1_HUMAN Cytoplasmic dynein 1 heavy chain 1	267	8.88418	8.37882	8.9286	8.88769	7.18417	6.86478	7.79235	7.22341	6.20112	5.608	6.62858	5.73861	2.98617	3.97189	2.56098	2.16064
sp|Q8N128-2|F177A_HUMAN	FAM177A1	F177A_HUMAN Isoform 2 of Protein FAM177A1	7	5.28138	3.30917	4.79898	5.5513	5.91044	5.7346	5.58531	5.88545	5.73668	6.62881	6.08816	6.56508	6.92409	7.78559	8.45797	9.75698
sp|Q3B7J2|GFOD2_HUMAN	GFOD2	GFOD2_HUMAN Glucose-fructose oxidoreductase domain-containing protein 2	3	7.51813	8.1985	7.26219	6.764	6.42306	5.70412	6.56931	5.58683	6.57682	5.6007	6.03943	6.63064	5.56684	5.22686	5.03705	5.29552
sp|Q9BXK5|B2L13_HUMAN	BCL2L13	B2L13_HUMAN Bcl-2-like protein 13	10	5.27189	4.75048	5.24951	5.44693	6.13093	6.75504	5.99851	6.41973	6.29926	7.07204	6.67771	6.29543	7.24662	6.69269	6.6851	7.00814
sp|Q15436|SC23A_HUMAN	SEC23A	SC23A_HUMAN Protein transport protein Sec23A	23	5.78035	5.43832	5.82132	5.73231	6.77675	6.49989	6.53435	6.28244	6.6509	6.48303	7.00296	6.58662	6.81352	6.01625	6.30008	5.28091
sp|Q15437|SC23B_HUMAN	SEC23B	SC23B_HUMAN Protein transport protein Sec23B	38	5.36185	5.33444	5.20509	5.28228	5.72187	6.02212	5.55403	5.85175	5.88248	6.23637	5.78671	6.31298	7.16898	7.49537	8.06644	8.71726
sp|Q7L266|ASGL1_HUMAN	ASRGL1	ASGL1_HUMAN Isoaspartyl peptidase/L-asparaginase	14	4.9661	5.55858	4.8489	5.05631	5.61155	6.09896	5.40434	5.81067	5.43024	6.22565	5.74427	6.13249	7.58653	7.79262	8.44225	9.29055
sp|P61927|RL37_HUMAN	RPL37	RL37_HUMAN 60S ribosomal protein L37	3	6.612	7.35189	6.36986	6.55453	5.76816	6.10622	5.85185	5.66386	5.29247	5.372	5.77096	5.83314	5.71874	6.48054	7.5354	7.71837
sp|Q86U90|YRDC_HUMAN	YRDC	YRDC_HUMAN YrdC domain-containing protein, mitochondrial	12	6.49046	7.0668	6.32425	6.17615	6.9856	6.55226	6.91657	6.72844	7.07892	6.36591	6.91744	6.75378	5.90544	5.20213	4.91045	3.62539
sp|P22102|PUR2_HUMAN	GART	PUR2_HUMAN Trifunctional purine biosynthetic protein adenosine-3	110	7.11058	6.91909	7.13201	6.87787	7.10955	6.6595	7.18581	6.75998	6.95738	6.39369	7.0238	6.40218	5.12862	4.76977	4.15743	3.41274
tr|C9JZG2|C9JZG2_HUMAN	GART	C9JZG2_HUMAN Phosphoribosylformylglycinamidine cyclo-ligase (Fragment)	3	6.88666	7.60141	7.21382	5.68404	7.052	5.9526	6.54003	6.31675	8.10765	7.01798	5.63073	6.74021	5.55837	5.86368	4.44903	3.38502
sp|P22314|UBA1_HUMAN	UBA1	UBA1_HUMAN Ubiquitin-like modifier-activating enzyme 1	101	6.12222	5.6125	6.17978	6.1031	7.04447	6.45643	6.92595	6.68715	7.35922	6.97981	7.10413	6.61954	6.49423	5.36818	5.02303	3.92026
tr|Q5JRS3|Q5JRS3_HUMAN	UBA1	Q5JRS3_HUMAN Ubiquitin-like modifier-activating enzyme 1 (Fragment)	1	3.63945	7.07788	3.11253	8.51519	5.98337	5.6031	7.91284	21.0794	5.99605	4.68238	2.49422	5.04096	6.10207	5.68552	3.64173	3.43327
sp|Q96F86|EDC3_HUMAN	EDC3	EDC3_HUMAN Enhancer of mRNA-decapping protein 3	15	7.2011	7.25548	7.46202	7.08017	6.65729	6.28142	6.53319	5.98863	6.50577	5.60646	6.52242	5.94563	5.69858	5.17758	5.36597	4.71829
sp|P11766|ADHX_HUMAN	ADH5	ADHX_HUMAN Alcohol dehydrogenase class-3	40	5.57546	5.66567	5.60274	5.38669	6.63705	6.46751	6.48266	6.40853	7.0297	6.66309	6.54855	6.49751	7.14836	6.12277	6.31517	5.44853
sp|P13804|ETFA_HUMAN	ETFA	ETFA_HUMAN Electron transfer flavoprotein subunit alpha, mitochondrial	21	6.48277	5.88388	6.1803	6.33717	6.93316	6.51594	6.72738	6.6822	6.8588	6.32274	6.54653	6.21395	6.25083	5.56255	5.5142	4.9876
sp|Q2TAZ0-3|ATG2A_HUMAN	ATG2A	ATG2A_HUMAN Isoform 2 of Autophagy-related protein 2 homolog A	3	9.11642	9.32619	7.97009	7.86582	6.18764	6.84128	6.77394	5.72729	7.03454	6.02959	5.53174	5.48643	3.77703	4.74541	3.91204	3.67455
sp|P31153|METK2_HUMAN	MAT2A	METK2_HUMAN S-adenosylmethionine synthase isoform type-2	42	5.49693	5.55969	5.55836	5.60115	6.05067	5.90099	5.77103	5.87814	6.28219	6.53271	6.24709	6.23785	7.18708	7.01933	7.58048	7.09632
sp|Q8TBN0|R3GEF_HUMAN	RAB3IL1	R3GEF_HUMAN Guanine nucleotide exchange factor for Rab-3A	10	5.3218	4.56892	5.56222	5.66826	6.01402	5.90775	5.97621	6.24273	5.88384	6.51043	6.7011	6.64351	6.86537	6.98603	7.27274	7.87504
sp|Q8N9M5|TM102_HUMAN	TMEM102	TM102_HUMAN Transmembrane protein 102	2	7.3849	7.68585	7.71842	7.04035	6.6729	6.34335	7.36598	6.00981	6.87464	6.38186	6.78514	6.69186	5.24301	4.54254	4.10138	3.15801
sp|P10809|CH60_HUMAN	HSPD1	CH60_HUMAN 60 kDa heat shock protein, mitochondrial	521	5.48648	5.54703	5.50823	5.49248	6.37073	6.19379	6.18937	6.2191	6.7682	6.69174	6.57213	6.50676	7.35276	6.57189	6.66995	5.85937
sp|Q15814|TBCC_HUMAN	TBCC	TBCC_HUMAN Tubulin-specific chaperone C	16	4.7843	4.76682	4.8672	4.9539	5.56157	6.2858	5.76251	6.26266	5.54609	6.54975	6.44548	6.59984	7.10134	7.38195	7.99931	9.13148
sp|Q5T1M5|FKB15_HUMAN	FKBP15	FKB15_HUMAN FK506-binding protein 15	16	6.48627	8.36779	6.50065	6.5705	6.34956	6.31315	6.50523	6.22179	6.43483	6.20957	6.64876	6.17125	5.62167	5.57426	5.21522	4.8095
sp|P49321|NASP_HUMAN	NASP	NASP_HUMAN Nuclear autoantigenic sperm protein	118	4.96822	5.11586	4.85527	5.01454	5.64063	5.9578	5.40831	5.82064	5.79177	6.45651	5.66818	6.3432	7.61252	7.72731	8.32303	9.29621
sp|P49321-2|NASP_HUMAN	NASP	NASP_HUMAN Isoform 2 of Nuclear autoantigenic sperm protein	1	4.00596	5.12608	5.3522	6.40885	3.19706	5.99813	3.93159	5.52458	5.68981	7.20211	4.53058	6.01225	7.49189	8.00993	9.91729	11.6017
sp|Q14974|IMB1_HUMAN	KPNB1	IMB1_HUMAN Importin subunit beta-1	98	5.755	5.26098	5.72817	5.68265	6.35392	6.33654	6.34792	6.33786	6.62442	6.76504	6.25109	6.38503	7.07081	6.42733	6.44952	6.22374
sp|Q99460|PSMD1_HUMAN	PSMD1	PSMD1_HUMAN 26S proteasome non-ATPase regulatory subunit 1	77	6.21337	5.85292	6.30182	6.28594	6.60352	6.32697	6.8244	6.40188	6.72001	6.50045	6.69184	6.11414	6.28303	5.85711	5.88729	5.13529
sp|A1L0T0|ILVBL_HUMAN	ILVBL	ILVBL_HUMAN Acetolactate synthase-like protein	20	6.9568	6.35806	7.25741	7.2022	6.31352	6.17772	6.55683	6.37082	6.32498	6.10205	6.40369	6.29372	5.5273	5.69168	5.3396	5.12361
sp|Q99871-2|HAUS7_HUMAN	HAUS7	HAUS7_HUMAN Isoform 2 of HAUS augmin-like complex subunit 7	6	7.02761	6.18885	6.7262	6.81207	6.2904	6.41473	6.56142	6.29984	6.0196	6.12224	6.25815	6.50603	5.63472	5.72544	5.71535	5.69735
sp|Q01844-5|EWS_HUMAN	EWSR1	EWS_HUMAN Isoform 5 of RNA-binding protein EWS	11	5.40578	5.5205	5.28422	5.40624	5.8368	5.40518	5.69715	5.57716	5.92735	5.65219	5.99702	5.96439	7.60989	6.85573	8.79208	9.06834
sp|Q8WUM4|PDC6I_HUMAN	PDCD6IP	PDC6I_HUMAN Programmed cell death 6-interacting protein	65	6.79819	6.77763	6.79333	6.66708	6.94374	6.62216	6.94782	6.72704	6.97531	6.52973	7.05065	6.51856	5.4554	5.06082	4.47408	3.65845
sp|Q13530|SERC3_HUMAN	SERINC3	SERC3_HUMAN Serine incorporator 3	9	4.869	5.64923	4.79069	5.09977	5.3619	5.81117	5.19132	5.61466	5.8364	6.61719	5.835	6.45388	7.57681	7.80641	8.03607	9.45049
sp|Q9NRX5|SERC1_HUMAN	SERINC1	SERC1_HUMAN Serine incorporator 1	5	5.05547	5.74977	5.07388	4.58394	5.53529	5.52968	5.52242	5.71741	6.29461	6.4127	5.68216	6.29216	7.80262	7.37784	8.19526	9.17477
sp|Q9NR30|DDX21_HUMAN	DDX21	DDX21_HUMAN Nucleolar RNA helicase 2	43	12.5472	12.7405	12.2066	12.9301	5.57189	5.15264	6.23735	5.89507	3.94482	3.58706	4.30459	3.80384	1.82763	5.65872	1.94733	1.64468
sp|Q9BQ39|DDX50_HUMAN	DDX50	DDX50_HUMAN ATP-dependent RNA helicase DDX50	4	10.784	10.8136	11.3357	11.5023	5.95256	5.15005	6.27506	5.90601	4.70885	3.91524	4.50835	4.33065	2.9681	6.26072	2.78976	2.7991
sp|Q9BUT1|BDH2_HUMAN	BDH2	BDH2_HUMAN 3-hydroxybutyrate dehydrogenase type 2	4	6.87545	6.49988	6.71266	6.08722	7.28975	6.59365	7.19841	6.57218	7.12022	6.5888	7.05945	6.84129	5.74284	4.66916	4.40624	3.7428
sp|P13716-2|HEM2_HUMAN	ALAD	HEM2_HUMAN Isoform 2 of Delta-aminolevulinic acid dehydratase	10	5.103	4.17129	5.31545	5.32118	5.50332	5.90927	5.34841	5.82374	5.86785	6.32733	5.78087	6.76598	7.24879	7.64098	8.16891	9.70363
sp|Q9Y4E6|WDR7_HUMAN	WDR7	WDR7_HUMAN WD repeat-containing protein 7	4	7.5684	6.74489	8.99063	8.19871	7.29177	7.33792	7.35145	6.65445	6.7019	5.89073	7.02716	5.77818	3.59969	4.34824	3.00341	3.51249
sp|Q96KC2|ARL5B_HUMAN	ARL5B	ARL5B_HUMAN ADP-ribosylation factor-like protein 5B	5	6.09777	4.23664	6.7075	6.30543	6.78613	6.38367	6.47705	6.31309	6.97535	6.50526	6.55029	6.68244	6.21411	5.72055	6.13905	5.90566
sp|Q13435|SF3B2_HUMAN	SF3B2	SF3B2_HUMAN Splicing factor 3B subunit 2	63	6.43221	6.31276	6.41884	6.30337	6.67413	6.47842	6.70098	6.57278	6.5578	6.27258	6.81456	6.24052	6.12025	5.51155	5.60387	4.98538
tr|H0YEX5|H0YEX5_HUMAN	SF3B2	H0YEX5_HUMAN Splicing factor 3B subunit 2 (Fragment)	1	5.80187	6.96363	7.0421	7.35579	5.82016	4.96034	5.11188	4.72317	7.92008	5.61808	5.24661	6.41221	6.84426	4.75985	6.89174	8.52824
sp|Q96KN1|FA84B_HUMAN	FAM84B	FA84B_HUMAN Protein FAM84B	3	5.72477	5.89073	5.98015	6.12248	6.92561	6.4618	6.73191	6.47835	7.11174	6.61776	6.91842	6.92218	6.74481	5.66506	5.06131	4.64292
sp|Q96ST2|IWS1_HUMAN	IWS1	IWS1_HUMAN Protein IWS1 homolog	24	5.80604	5.62541	5.54143	5.59749	6.35673	6.26489	6.23005	6.27129	6.51374	6.42062	6.32186	6.44157	6.88344	6.38768	6.75388	6.58388
sp|Q9BZE4|NOG1_HUMAN	GTPBP4	NOG1_HUMAN Nucleolar GTP-binding protein 1	31	8.80389	8.6597	8.81746	8.84594	6.61831	5.78448	6.57497	6.14655	6.02075	5.09962	5.89998	5.48487	4.16701	5.18157	4.20043	3.69448
sp|Q96GX9|MTNB_HUMAN	APIP	MTNB_HUMAN Methylthioribulose-1-phosphate dehydratase	13	5.29276	5.15002	4.95563	5.2184	5.8239	5.85708	5.34184	5.51852	5.57622	6.17856	5.9506	6.38057	7.28683	7.47934	8.39444	9.5953
sp|Q6P2Q9|PRP8_HUMAN	PRPF8	PRP8_HUMAN Pre-mRNA-processing-splicing factor 8	95	8.68611	9.24598	8.62719	8.40002	6.88727	6.47023	7.1032	6.51374	6.24514	5.59593	6.2161	5.66053	3.80496	4.57137	3.22665	2.74558
sp|Q8N8S7|ENAH_HUMAN	ENAH	ENAH_HUMAN Protein enabled homolog	24	5.01569	4.51644	4.71541	5.00393	5.53688	5.74187	5.18522	5.61379	5.64223	6.36485	5.54255	6.0599	7.75354	7.90787	9.13599	10.2638
sp|Q9UI08-2|EVL_HUMAN	EVL	EVL_HUMAN Isoform 1 of Ena/VASP-like protein	1	5.07225	6.42026	5.5119	5.34435	4.98672	6.54859	5.17359	5.5542	5.91093	6.42103	5.8273	5.89137	7.86574	7.73282	6.7099	9.02904
sp|O43301|HS12A_HUMAN	HSPA12A	HS12A_HUMAN Heat shock 70 kDa protein 12A	20	6.40953	6.29494	6.61277	6.32089	6.64226	6.2702	6.36346	6.15172	6.64759	6.13234	6.45749	6.33037	6.05884	5.79883	5.84536	5.66342
sp|Q4KMQ1|TPRN_HUMAN	TPRN	TPRN_HUMAN Taperin	5	6.3888	7.23943	6.57621	6.92674	5.83299	5.91045	6.49271	6.02696	6.02757	6.21522	6.59407	6.141	5.43276	5.83415	6.02073	6.3402
sp|P39060|COIA1_HUMAN	COL18A1	COIA1_HUMAN Collagen alpha-1(XVIII) chain	6	6.7402	7.12249	6.79946	6.15389	6.4844	6.04487	6.23506	6.4565	6.09913	5.91853	6.37633	6.23301	6.06368	5.83341	5.92629	5.51276
sp|Q7L8L6|FAKD5_HUMAN	FASTKD5	FAKD5_HUMAN FAST kinase domain-containing protein 5	10	8.6972	9.52369	8.71123	8.6492	6.56636	6.61913	6.71497	6.90255	6.36162	5.45394	6.26617	5.67204	3.51497	4.49688	3.11644	2.73362
sp|P13929|ENOB_HUMAN	ENO3	ENOB_HUMAN Beta-enolase	52	7.11504	7.24098	7.30847	8.27322	6.2209	6.55411	5.97465	6.70969	5.72638	6.05395	6.75687	6.18712	4.40528	4.87214	5.08813	5.51308
sp|P06733|ENOA_HUMAN	ENO1	ENOA_HUMAN Alpha-enolase	478	5.12713	5.69876	5.04533	5.29236	5.51997	5.81766	5.17986	5.64591	5.87041	6.28018	5.71239	6.35525	7.20931	7.54647	8.20127	9.49773
sp|P09104|ENOG_HUMAN	ENO2	ENOG_HUMAN Gamma-enolase	16	4.80967	5.24238	4.83024	5.13688	5.36515	5.86735	5.08888	5.97007	5.99997	6.80321	5.97423	6.53378	7.10033	7.55162	8.17493	9.5513
sp|P06733-2|ENOA_HUMAN	ENO1	ENOA_HUMAN Isoform MBP-1 of Alpha-enolase	8	4.41337	4.77045	4.10891	4.56886	5.36825	5.67298	4.6722	5.54622	4.73577	5.45873	5.91879	5.25797	8.24817	9.29842	10.1995	11.7614
sp|P00558|PGK1_HUMAN	PGK1	PGK1_HUMAN Phosphoglycerate kinase 1	166	4.803	4.863	4.81753	4.80593	5.74499	5.8712	5.38356	5.82778	6.23313	6.57639	5.72733	6.77782	7.75293	7.29243	8.53706	8.98594
sp|P07205|PGK2_HUMAN	PGK2	PGK2_HUMAN Phosphoglycerate kinase 2	2	5.48532	12.4505	5.38638	4.3266	5.61358	4.77428	4.84218	5.07214	5.23878	5.40059	5.14987	5.72285	7.79748	7.81183	7.6915	7.23615
sp|Q9NQG1|MANBL_HUMAN	MANBAL	MANBL_HUMAN Protein MANBAL	1	5.21787	5.4384	5.27764	4.97096	5.68617	6.02991	5.30493	5.47529	5.96085	6.71106	5.85132	6.01602	7.95698	7.17862	7.82862	9.09534
sp|P22033|MUTA_HUMAN	MUT	MUTA_HUMAN Methylmalonyl-CoA mutase, mitochondrial	24	4.90813	4.9126	5.12314	5.07076	5.9396	5.94614	5.70575	5.94011	6.38411	6.76181	6.00223	6.35953	7.807	7.4192	7.98004	7.73985
sp|Q9BQS8|FYCO1_HUMAN	FYCO1	FYCO1_HUMAN FYVE and coiled-coil domain-containing protein 1	21	6.76666	7.13392	7.04936	6.80665	6.86082	6.54693	7.05313	6.54198	6.81419	6.19597	6.85416	6.52884	5.1949	5.06505	4.7129	3.87454
sp|Q9NP81|SYSM_HUMAN	SARS2	SYSM_HUMAN Serine--tRNA ligase, mitochondrial	24	6.42224	6.01	6.56305	6.47813	6.88353	6.59736	6.89561	6.58314	6.75384	6.29882	7.07168	6.62458	6.08364	5.3219	5.02758	4.38491
sp|P00390|GSHR_HUMAN	GSR	GSHR_HUMAN Glutathione reductase, mitochondrial	37	5.85402	6.43003	5.45237	6.00421	5.74338	6.18407	5.47226	5.87588	5.55659	6.17722	5.76731	6.18893	6.67394	6.78482	7.13013	8.70482
sp|P00390-5|GSHR_HUMAN	GSR	GSHR_HUMAN Isoform 4 of Glutathione reductase, mitochondrial	1	4.45687	5.24899	4.06393	4.68443	4.93246	5.86347	4.38663	5.2289	4.81249	5.75583	5.23775	5.72247	8.24435	9.36423	9.71581	12.2814
sp|Q8NFQ8|TOIP2_HUMAN	TOR1AIP2	TOIP2_HUMAN Torsin-1A-interacting protein 2	11	6.3762	6.81837	6.18211	6.26575	6.50136	6.3812	6.36776	6.55377	6.32713	6.05004	6.50865	6.22147	6.21405	6.03617	5.85077	5.34519
sp|Q5JTV8|TOIP1_HUMAN	TOR1AIP1	TOIP1_HUMAN Torsin-1A-interacting protein 1	25	7.38553	7.70676	7.4148	7.40602	6.7421	6.71125	7.07089	6.87881	6.5781	6.08561	6.84882	6.32076	4.59668	4.69059	4.10688	3.45641
sp|Q15125|EBP_HUMAN	EBP	EBP_HUMAN 3-beta-hydroxysteroid-Delta(8),Delta(7)-isomerase	1	6.19581	5.13241	5.83535	5.84891	6.85445	6.40332	6.20147	6.48715	6.66524	6.629	6.35872	6.53553	6.9174	6.12341	5.66331	6.14853
sp|P35611-3|ADDA_HUMAN	ADD1	ADDA_HUMAN Isoform 3 of Alpha-adducin	15	6.15528	6.40636	6.26381	6.27366	6.23652	6.08817	6.13291	6.02556	6.29727	6.16155	6.39405	6.34851	6.31135	6.17629	6.4037	6.325
sp|P09958|FURIN_HUMAN	FURIN	FURIN_HUMAN Furin	10	5.51429	4.97806	5.57188	5.51734	5.62797	4.93072	4.55778	4.65338	6.49552	6.07399	5.29974	6.33466	8.06599	7.92482	8.68923	9.76462
sp|P24752|THIL_HUMAN	ACAT1	THIL_HUMAN Acetyl-CoA acetyltransferase, mitochondrial	44	5.12889	5.07711	4.86944	5.04171	5.78711	5.98144	5.44441	5.72543	5.89141	6.51715	5.77859	6.19235	7.46825	7.5702	8.4079	9.11861
tr|E9PKF3|E9PKF3_HUMAN	ACAT1	E9PKF3_HUMAN Acetyl-CoA acetyltransferase, mitochondrial (Fragment)	1	4.69368	4.69428	5.02126	5.09807	5.09444	4.76646	5.27437	5.20275	6.35179	6.90803	4.62278	6.37528	8.18902	8.29255	9.5257	9.88952
sp|P51659|DHB4_HUMAN	HSD17B4	DHB4_HUMAN Peroxisomal multifunctional enzyme type 2	90	5.54352	5.44405	5.66259	5.47244	6.37465	6.30703	6.22818	6.17471	6.60211	6.53041	6.44863	6.42825	7.2764	6.48994	6.78252	6.23457
sp|P11310-2|ACADM_HUMAN	ACADM	ACADM_HUMAN Isoform 2 of Medium-chain specific acyl-CoA dehydrogenase, mitochondrial	28	5.91451	5.60393	5.73741	5.73984	6.15319	5.69743	5.96756	5.75862	6.43343	6.24207	6.51275	6.03732	7.50478	6.60985	7.59562	6.4917
sp|O94967|WDR47_HUMAN	WDR47	WDR47_HUMAN WD repeat-containing protein 47	12	5.8956	6.1507	5.86801	5.53011	6.58385	6.18597	6.36558	6.15691	6.8458	6.56878	6.45389	6.63019	7.03103	5.98164	6.15316	5.59878
sp|Q8NBN7|RDH13_HUMAN	RDH13	RDH13_HUMAN Retinol dehydrogenase 13	10	8.08531	7.82761	8.53805	8.08601	7.02797	7.00869	7.79502	7.21452	6.1211	5.96985	6.97704	6.21005	3.54801	4.43627	2.84663	2.30787
sp|O15498|YKT6_HUMAN	YKT6	YKT6_HUMAN Synaptobrevin homolog YKT6	23	4.96332	5.0427	4.74327	4.78284	5.62304	5.9172	5.36248	5.70456	5.98971	6.48878	5.56537	6.29937	7.6646	7.77371	8.62541	9.45364
sp|P51649-2|SSDH_HUMAN	ALDH5A1	SSDH_HUMAN Isoform 2 of Succinate-semialdehyde dehydrogenase, mitochondrial	20	5.01333	5.38409	4.97276	5.23608	5.52333	5.86916	5.36081	5.79927	5.51558	6.16272	5.82528	6.32309	7.35727	7.9036	8.31802	9.4356
sp|Q15262-2|PTPRK_HUMAN	PTPRK	PTPRK_HUMAN Isoform 2 of Receptor-type tyrosine-protein phosphatase kappa	8	5.92545	6.13389	5.85903	5.67693	6.07693	6.28002	6.20264	6.10604	6.50813	6.51537	6.6635	6.42404	7.04867	6.32995	6.3796	5.86981
sp|P05141|ADT2_HUMAN	SLC25A5	ADT2_HUMAN ADP/ATP translocase 2	24	8.45459	6.64032	8.55431	8.46225	6.8202	6.60548	7.10026	6.88838	6.51095	5.90476	6.65299	6.11563	4.0512	4.87053	3.45636	2.9118
sp|P12236|ADT3_HUMAN	SLC25A6	ADT3_HUMAN ADP/ATP translocase 3	49	9.06125	8.96495	8.79312	8.65971	6.86195	6.53912	7.20934	6.66211	6.28247	5.62458	6.29058	5.78737	3.44626	4.47122	2.92747	2.41847
sp|P12235|ADT1_HUMAN	SLC25A4	ADT1_HUMAN ADP/ATP translocase 1	5	8.04629	8.1195	7.97964	7.95329	6.79847	6.66547	6.84681	7.04084	6.23314	5.76147	6.59029	5.60437	3.99124	5.01171	3.64728	3.71018
sp|P04083|ANXA1_HUMAN	ANXA1	ANXA1_HUMAN Annexin A1	78	6.43439	6.09754	6.39555	6.23975	7.09941	6.57157	6.90867	6.8041	7.45277	7.08967	6.92793	6.61285	6.37146	5.16683	4.41309	3.41442
sp|P22695|QCR2_HUMAN	UQCRC2	QCR2_HUMAN Cytochrome b-c1 complex subunit 2, mitochondrial	28	8.29069	8.191	8.45232	8.26805	7.29058	6.71143	7.46671	6.76222	6.29642	5.73558	6.57274	5.83057	3.98827	4.5085	3.15957	2.47534
sp|Q9C0B1|FTO_HUMAN	FTO	FTO_HUMAN Alpha-ketoglutarate-dependent dioxygenase FTO	35	5.04938	5.46942	5.06346	5.26294	5.62717	5.8694	5.39338	5.64219	5.86862	6.3269	5.91636	6.24629	7.5226	7.57669	8.31242	8.85277
sp|P54136|SYRC_HUMAN	RARS	SYRC_HUMAN Arginine--tRNA ligase, cytoplasmic	70	8.88376	8.63945	8.68439	8.5364	7.14512	6.4501	7.41136	6.85616	6.58356	5.74038	6.32796	5.79006	3.53835	4.29859	2.86785	2.24651
sp|P54136-2|SYRC_HUMAN	RARS	SYRC_HUMAN Isoform Monomeric of Arginine--tRNA ligase, cytoplasmic	1	8.89168	9.2583	8.43862	7.92002	7.1155	6.06006	7.84547	6.86247	6.74587	5.88351	6.34566	5.70052	3.62606	4.21653	3.04804	2.04167
sp|Q9C091|GRB1L_HUMAN	GREB1L	GRB1L_HUMAN GREB1-like protein	2	7.04692	6.56565	8.50498	7.61418	6.72393	6.82447	7.03861	5.98237	6.97721	5.29899	6.08521	5.54634	5.77522	5.18034	5.5463	3.2893
sp|Q9Y6Y8|S23IP_HUMAN	SEC23IP	S23IP_HUMAN SEC23-interacting protein	31	6.63785	6.78275	6.72267	6.60802	6.73886	6.52212	6.84373	6.64923	6.86378	6.5476	6.73027	6.2459	5.5371	5.44391	4.80486	4.32132
sp|O94830|DDHD2_HUMAN	DDHD2	DDHD2_HUMAN Phospholipase DDHD2	9	6.35371	6.83097	6.8714	6.11831	7.12515	6.49101	6.67204	6.65034	6.76439	6.5296	6.79113	6.45535	5.33852	5.15967	5.3005	4.5479
sp|P51610-4|HCFC1_HUMAN	HCFC1	HCFC1_HUMAN Isoform 4 of Host cell factor 1	88	5.51073	5.53674	5.47637	5.57173	6.188	6.14537	5.95265	6.12762	6.33055	6.40495	6.28167	6.51339	7.11071	6.61035	7.11261	7.12657
sp|P51610|HCFC1_HUMAN	HCFC1	HCFC1_HUMAN Host cell factor 1	2	5.35729	5.26138	5.5725	4.20018	6.44913	6.45431	6.9899	6.56631	5.24543	6.96692	6.03758	5.77434	7.57177	6.4848	6.95019	8.11796
sp|P17980|PRS6A_HUMAN	PSMC3	PRS6A_HUMAN 26S protease regulatory subunit 6A	54	7.03899	6.68706	6.97729	6.77064	7.30673	6.55922	7.27649	6.75864	7.25386	6.34379	6.88742	6.23183	5.60189	4.64979	4.31105	3.3453
sp|O95155-4|UBE4B_HUMAN	UBE4B	UBE4B_HUMAN Isoform 4 of Ubiquitin conjugation factor E4 B	34	7.14024	7.6449	7.41135	7.09213	6.80855	6.60254	7.07698	6.67525	6.78273	6.3426	6.696	6.28617	4.89132	4.81065	4.17963	3.55897
sp|Q9NWB6-2|ARGL1_HUMAN	ARGLU1	ARGL1_HUMAN Isoform 2 of Arginine and glutamate-rich protein 1	3	8.64491	9.82939	8.37431	9.34756	5.08981	5.83107	5.96977	5.81263	5.13878	5.31833	5.24741	4.81976	3.48754	6.61663	4.91858	5.55351
sp|P62873|GBB1_HUMAN	GNB1	GBB1_HUMAN Guanine nucleotide-binding protein G(I)/G(S)/G(T) subunit beta-1	14	5.66717	5.58954	6.03755	5.47649	6.68773	6.72112	6.82246	6.46301	6.61932	6.49717	7.01289	6.41398	6.71039	5.85461	6.10496	5.32163
sp|P62879|GBB2_HUMAN	GNB2	GBB2_HUMAN Guanine nucleotide-binding protein G(I)/G(S)/G(T) subunit beta-2	26	6.50971	5.5741	6.47154	6.0857	7.03771	6.61526	6.92133	6.7079	7.3982	6.62343	6.58903	6.21324	6.30925	5.45211	4.98377	4.50772
sp|Q9BRK4|LZTS2_HUMAN	LZTS2	LZTS2_HUMAN Leucine zipper putative tumor suppressor 2	6	7.45596	8.94963	7.20684	6.95238	6.18271	5.8582	6.04246	6.00029	5.9096	5.4895	6.28596	6.00411	5.63692	5.80766	5.26422	4.95356
sp|Q96QK1|VPS35_HUMAN	VPS35	VPS35_HUMAN Vacuolar protein sorting-associated protein 35	37	8.31832	7.82958	8.33785	8.28929	7.35702	6.69492	7.48817	7.07323	6.46325	6.02675	6.5749	6.12119	3.64442	4.21867	3.07857	2.48387
sp|Q8NEC7|GSTCD_HUMAN	GSTCD	GSTCD_HUMAN Glutathione S-transferase C-terminal domain-containing protein	5	6.78727	7.09427	7.04093	6.84655	6.30347	6.74106	6.97084	6.66885	6.73701	6.85666	6.98603	6.29321	4.95435	5.35072	4.24299	4.12578
sp|O95825|QORL1_HUMAN	CRYZL1	QORL1_HUMAN Quinone oxidoreductase-like protein 1	21	5.15047	5.20075	4.88315	5.02688	5.47988	5.74067	5.4381	5.53406	5.84799	6.25654	5.58632	6.33867	7.32644	7.69723	8.61919	9.87366
sp|Q99683|M3K5_HUMAN	MAP3K5	M3K5_HUMAN Mitogen-activated protein kinase kinase kinase 5	6	7.89177	7.11884	6.89462	7.8787	6.595	6.52915	6.83712	6.50855	6.34713	6.13221	6.74439	6.23441	4.7067	4.80522	4.60246	4.17373
sp|Q8WX92|NELFB_HUMAN	NELFB	NELFB_HUMAN Negative elongation factor B	23	8.32821	8.72759	8.29815	8.13297	6.82116	6.4672	7.24427	6.61317	6.33908	5.82976	6.39604	6.06838	3.88248	4.4885	3.36566	2.99738
sp|Q8IZ69|TRM2A_HUMAN	TRMT2A	TRM2A_HUMAN tRNA (uracil-5-)-methyltransferase homolog A	15	7.7551	8.26049	7.68555	7.82965	6.47664	6.44635	6.54153	6.27691	6.11906	5.79932	6.30279	6.16057	4.48719	5.35539	4.28144	4.22202
sp|Q7Z3D6-2|CN159_HUMAN	C14orf159	CN159_HUMAN Isoform 2 of UPF0317 protein C14orf159, mitochondrial	16	6.35797	6.10475	6.65812	6.56467	6.91279	6.67878	6.92353	6.59566	7.08368	6.56932	6.83654	6.82617	5.50514	5.16783	4.77678	4.43829
sp|Q9UJV9|DDX41_HUMAN	DDX41	DDX41_HUMAN Probable ATP-dependent RNA helicase DDX41	20	8.4018	8.24002	8.2588	8.37751	6.40103	6.49447	6.61876	6.61717	6.17339	5.68295	5.83288	5.83503	4.27588	5.13467	3.89631	3.75934
sp|P48449|ERG7_HUMAN	LSS	ERG7_HUMAN Lanosterol synthase	27	5.84411	5.64651	6.08416	5.81263	6.16193	6.27386	6.22604	6.34391	6.64163	6.6539	6.72758	6.68466	6.66337	6.26518	6.15803	5.8125
sp|Q96BR5|SELR1_HUMAN	SELRC1	SELR1_HUMAN Sel1 repeat-containing protein 1	16	5.00322	4.6964	4.80436	5.08303	5.71925	5.92456	5.38161	5.8054	5.63164	6.4476	5.8259	6.38114	7.55109	7.77125	8.74575	9.22779
sp|P42575|CASP2_HUMAN	CASP2	CASP2_HUMAN Caspase-2	10	5.2528	4.01256	5.84325	5.86947	6.43831	6.33829	6.39977	6.68357	6.55104	6.89481	6.44223	6.23028	6.54515	6.7321	7.06137	6.70502
sp|Q96T76-8|MMS19_HUMAN	MMS19	MMS19_HUMAN Isoform 5 of MMS19 nucleotide excision repair protein homolog	31	7.62825	7.29169	7.83001	8.02585	6.63952	6.64886	7.32956	6.83946	6.25429	6.14478	6.71245	5.91643	4.3564	4.94515	4.06069	3.3766
sp|Q5W0V3|F16B1_HUMAN	FAM160B1	F16B1_HUMAN Protein FAM160B1	17	6.66493	6.07702	7.06623	6.73688	6.85207	6.59614	7.05861	6.46245	7.09379	6.86399	7.13125	6.60951	5.56305	4.99852	4.57481	3.65075
sp|Q86V87|F16B2_HUMAN	FAM160B2	F16B2_HUMAN Protein FAM160B2	3	7.72375	7.50406	7.94395	8.39736	6.89813	6.66679	6.81104	6.47619	6.72728	6.53503	6.42069	5.62139	4.20492	5.33386	3.38231	3.35324
sp|Q5R3I4|TTC38_HUMAN	TTC38	TTC38_HUMAN Tetratricopeptide repeat protein 38	11	4.81314	4.94691	4.89307	5.18322	5.29203	6.07424	5.71653	6.04446	5.68798	6.43692	6.12681	6.40697	7.6612	8.13194	8.01198	8.5726
sp|Q6PD62|CTR9_HUMAN	CTR9	CTR9_HUMAN RNA polymerase-associated protein CTR9 homolog	28	7.43752	7.07339	7.42666	7.23594	6.99114	6.64737	7.30329	6.76465	6.56325	5.90801	6.95053	6.10568	4.89765	4.83166	4.34133	3.52193
sp|Q8N6H7|ARFG2_HUMAN	ARFGAP2	ARFG2_HUMAN ADP-ribosylation factor GTPase-activating protein 2	22	6.10936	6.74791	5.97195	6.02082	5.994	6.11295	5.93428	5.81665	6.27741	6.10742	6.07938	6.37012	6.65442	6.26008	6.82116	6.7221
sp|Q9NR09|BIRC6_HUMAN	BIRC6	BIRC6_HUMAN Baculoviral IAP repeat-containing protein 6	44	7.42406	7.15146	7.62546	7.61343	6.98917	6.71343	7.20794	6.88607	6.6232	6.18175	6.87993	6.23484	4.47597	4.69595	3.88439	3.41296
sp|Q9NRP4|ACN9_HUMAN	ACN9	ACN9_HUMAN Protein ACN9 homolog, mitochondrial	5	5.63668	6.269	5.50139	4.70406	6.37904	6.29366	6.53241	6.19342	6.55192	6.57498	6.60912	6.2664	6.77376	6.42225	6.96702	6.32492
sp|Q14847|LASP1_HUMAN	LASP1	LASP1_HUMAN LIM and SH3 domain protein 1	22	4.85043	5.47669	4.64515	5.01589	4.99307	5.65691	5.05653	5.40319	5.45659	6.34296	5.55578	6.31288	7.70475	8.0699	9.19727	10.262
sp|O76041-2|NEBL_HUMAN	NEBL	NEBL_HUMAN Isoform 2 of Nebulette	9	5.41111	5.59229	5.29573	5.42659	5.44698	5.68048	5.68229	5.48778	5.7167	5.93355	5.75469	5.85037	7.37937	7.3624	8.78144	9.19822
sp|Q9H9P8|L2HDH_HUMAN	L2HGDH	L2HDH_HUMAN L-2-hydroxyglutarate dehydrogenase, mitochondrial	13	7.70277	7.70873	7.82092	7.4166	6.65138	6.38326	6.87792	6.39895	6.62915	5.93178	6.4868	6.15435	4.44498	5.12127	4.35928	3.91185
sp|P35573|GDE_HUMAN	AGL	GDE_HUMAN Glycogen debranching enzyme	58	5.14194	5.05348	5.31799	5.30185	6.10133	6.25128	6.07175	6.24293	6.40936	6.64692	6.78543	6.41592	7.62711	6.91743	7.27278	6.44251
sp|P55789|ALR_HUMAN	GFER	ALR_HUMAN FAD-linked sulfhydryl oxidase ALR	5	5.38892	6.08443	5.24509	5.58812	5.64645	5.61254	4.76	5.23421	5.952	5.98915	5.2196	5.90773	7.64551	7.41629	8.48709	9.82285
sp|P00533|EGFR_HUMAN	EGFR	EGFR_HUMAN Epidermal growth factor receptor	40	6.02037	6.25826	6.16802	6.26737	6.32056	6.2209	6.36861	6.17788	6.4662	6.41456	6.53917	6.20914	6.67272	6.20667	6.17272	5.51685
sp|P04626|ERBB2_HUMAN	ERBB2	ERBB2_HUMAN Receptor tyrosine-protein kinase erbB-2	14	6.68449	7.23902	6.38312	6.32705	6.39063	5.84787	6.0064	5.75103	7.13054	6.35599	5.94903	6.36423	6.60009	5.75916	5.80036	5.41098
sp|Q16584|M3K11_HUMAN	MAP3K11	M3K11_HUMAN Mitogen-activated protein kinase kinase kinase 11	1	7.2514	8.23436	7.90853	6.75013	7.68408	7.59497	6.6426	6.12512	6.42512	4.9467	6.51479	5.68104	5.03842	5.05026	4.39291	3.75959
sp|Q5TCX8|M3KL4_HUMAN	MLK4	M3KL4_HUMAN Mitogen-activated protein kinase kinase kinase MLK4	2	7.70662	8.66191	7.86734	6.88527	5.77907	7.16583	6.61849	5.59901	5.70622	5.88209	6.52125	5.7773	5.23306	5.80332	5.09336	3.69985
sp|Q99536|VAT1_HUMAN	VAT1	VAT1_HUMAN Synaptic vesicle membrane protein VAT-1 homolog	26	5.86017	4.98403	5.81154	6.07486	6.96656	6.72001	6.67805	6.91957	6.93096	7.05508	6.88198	6.90968	6.39944	5.43159	5.44608	4.93041
sp|P22234-2|PUR6_HUMAN	PAICS	PUR6_HUMAN Isoform 2 of Multifunctional protein ADE2	140	4.92268	5.07859	4.70239	4.96733	5.44075	5.71604	5.12013	5.58185	5.75772	6.25134	5.56952	6.22619	7.79664	7.93509	8.8363	10.0974
tr|D6RF62|D6RF62_HUMAN	PAICS	D6RF62_HUMAN Phosphoribosylaminoimidazole carboxylase	2	6.79064	6.90154	4.77763	6.01542	5.14523	3.41181	3.37338	3.56075	6.10099	4.60031	2.83058	5.19796	9.58846	7.56909	10.5328	13.6034
sp|P49903|SPS1_HUMAN	SEPHS1	SPS1_HUMAN Selenide, water dikinase 1	23	4.81066	4.20325	4.82612	4.91665	5.76978	6.28631	5.59619	6.07037	5.91354	6.48005	6.11846	6.50014	7.56531	7.82738	8.33109	8.78473
sp|O14964|HGS_HUMAN	HGS	HGS_HUMAN Hepatocyte growth factor-regulated tyrosine kinase substrate	31	4.96648	5.13326	4.81423	4.88867	5.71607	6.00895	5.57547	5.70334	5.90427	6.27347	5.98377	6.14384	7.93653	7.62724	8.6002	8.72421
sp|P32121-3|ARRB2_HUMAN	ARRB2	ARRB2_HUMAN Isoform 2 of Beta-arrestin-2	11	6.82699	6.9199	6.84195	6.75848	6.6577	6.24854	6.50382	6.29381	7.02945	6.51844	6.5574	6.61644	5.98261	5.3093	4.87152	4.06366
sp|P49407-2|ARRB1_HUMAN	ARRB1	ARRB1_HUMAN Isoform 1B of Beta-arrestin-1	15	5.30492	5.16012	5.21905	5.20089	5.92727	5.85069	5.88107	5.86959	6.17412	6.46995	5.93361	6.28823	7.28263	7.22641	7.95559	8.25587
sp|Q15283|RASA2_HUMAN	RASA2	RASA2_HUMAN Ras GTPase-activating protein 2	6	8.38327	8.85609	8.74927	8.47073	6.73538	6.52212	6.46018	6.78936	6.22337	5.70841	5.71031	5.49085	4.03916	4.96165	3.54455	3.35529
sp|Q9C0C7-5|AMRA1_HUMAN	AMBRA1	AMRA1_HUMAN Isoform 5 of Activating molecule in BECN1-regulated autophagy protein 1	8	7.12221	6.44339	7.31854	7.303	6.48437	6.35832	7.09838	6.73214	6.25074	6.3716	6.15315	6.65764	5.02796	5.83437	4.78568	4.0585
sp|P29144|TPP2_HUMAN	TPP2	TPP2_HUMAN Tripeptidyl-peptidase 2	52	6.33336	6.58056	6.27883	6.29605	6.57926	6.44447	6.57001	6.36207	6.6915	6.4846	6.77199	6.56756	6.08396	5.61595	5.35346	4.98638
tr|Q5VZU9|Q5VZU9_HUMAN	TPP2	Q5VZU9_HUMAN Tripeptidyl-peptidase 2	2	6.58057	6.92868	6.34123	5.87037	6.09327	7.11335	6.88786	6.45619	6.43443	6.78128	7.58189	6.45426	5.81747	4.76845	4.78594	5.10476
sp|A0AVT1|UBA6_HUMAN	UBA6	UBA6_HUMAN Ubiquitin-like modifier-activating enzyme 6	57	6.68907	6.41205	6.93314	6.72803	6.91716	6.34451	6.97354	6.55092	7.17086	6.6519	7.16941	6.38088	5.67734	5.09378	4.6355	3.67191
sp|Q6YN16|HSDL2_HUMAN	HSDL2	HSDL2_HUMAN Hydroxysteroid dehydrogenase-like protein 2	27	6.63338	6.05322	6.86067	6.71005	6.95527	6.91532	7.56739	6.89861	6.7723	6.54199	7.37151	6.43537	5.46765	4.80164	4.38896	3.62667
sp|P16144-2|ITB4_HUMAN	ITGB4	ITB4_HUMAN Isoform Beta-4A of Integrin beta-4	95	5.69773	5.7142	5.63917	5.58715	6.15189	6.12856	5.80201	6.03604	6.29984	6.34706	6.08692	6.30721	6.91496	6.77344	7.15685	7.35697
sp|P53801|PTTG_HUMAN	PTTG1IP	PTTG_HUMAN Pituitary tumor-transforming gene 1 protein-interacting protein	2	4.62308	5.31164	4.61949	4.99108	4.87257	5.3353	5.61557	5.20176	5.69053	6.47603	6.49191	6.14022	7.442	8.0503	9.3668	9.77172
sp|P36952|SPB5_HUMAN	SERPINB5	SPB5_HUMAN Serpin B5	34	7.15329	7.03836	7.18698	7.0334	7.0355	6.54584	7.01991	6.79142	6.99069	6.15148	6.86041	6.46146	5.18715	4.85571	4.26305	3.42536
sp|Q93063-3|EXT2_HUMAN	EXT2	EXT2_HUMAN Isoform 3 of Exostosin-2	13	7.97059	7.28254	8.04537	7.73365	6.84531	6.18166	6.95768	6.32652	6.41672	5.75853	6.50068	6.12346	4.81928	5.20445	4.26098	3.57257
sp|P35998|PRS7_HUMAN	PSMC2	PRS7_HUMAN 26S protease regulatory subunit 7	43	7.11006	7.30903	7.23706	7.01373	7.18572	6.58101	7.30793	6.75102	7.15859	6.26643	7.06997	6.17437	5.13243	4.56836	4.10493	3.02935
sp|P43686|PRS6B_HUMAN	PSMC4	PRS6B_HUMAN 26S protease regulatory subunit 6B	41	7.29756	6.76201	7.38934	7.09829	7.36731	6.49078	7.49156	6.76151	7.3653	6.23178	7.10257	6.16995	5.23458	4.33379	3.94586	2.9578
sp|P62191|PRS4_HUMAN	PSMC1	PRS4_HUMAN 26S protease regulatory subunit 4	46	7.45785	7.08567	7.44242	7.07847	7.44211	6.56546	7.7229	6.87365	7.19138	6.17575	7.05908	6.01148	4.9426	4.29737	3.78557	2.86823
tr|G3V4X1|G3V4X1_HUMAN	PSMC1	G3V4X1_HUMAN 26S protease regulatory subunit 4 (Fragment)	1	3.59805	59.1015	4.35701	3.04772	2.10208	3.22632	2.15243	2.13548	4.37222	2.17865	1.88462	2.46151	4.32277	2.40097	1.65331	1.00541
sp|Q8NB90|SPAT5_HUMAN	SPATA5	SPAT5_HUMAN Spermatogenesis-associated protein 5	29	8.9096	7.66324	8.98014	9.07268	7.04563	6.47428	7.44303	6.80651	6.02996	5.34962	6.2125	5.31232	3.76735	4.94404	3.22068	2.76843
sp|P62195|PRS8_HUMAN	PSMC5	PRS8_HUMAN 26S protease regulatory subunit 8	39	7.28024	7.11483	7.44187	7.22287	7.44176	6.49177	7.54655	6.80411	7.3155	6.26676	7.07132	6.16416	4.90558	4.21976	3.8657	2.84722
sp|O15091|MRRP3_HUMAN	KIAA0391	MRRP3_HUMAN Mitochondrial ribonuclease P protein 3	14	8.18705	8.72899	8.40779	8.22042	6.81744	6.43465	7.10071	6.63332	6.29035	5.79388	6.54243	5.70176	3.96514	4.67734	3.47721	3.02151
sp|Q9NS87|KIF15_HUMAN	KIF15	KIF15_HUMAN Kinesin-like protein KIF15	31	5.43382	5.26783	5.40945	5.29245	6.04407	5.86242	5.79012	5.78632	6.66623	6.48265	6.22492	6.52401	7.9527	6.79506	7.60227	6.86569
sp|Q86WJ1|CHD1L_HUMAN	CHD1L	CHD1L_HUMAN Chromodomain-helicase-DNA-binding protein 1-like	15	8.23372	8.66038	8.29964	8.20849	6.47878	6.10232	6.84231	6.2747	6.23482	5.79675	6.26863	5.99488	4.19872	4.99097	3.90031	3.51459
sp|P15104|GLNA_HUMAN	GLUL	GLNA_HUMAN Glutamine synthetase	19	4.98706	5.58384	5.04901	5.295	5.42961	5.70737	5.24068	5.56151	5.78353	6.26827	5.94183	6.51337	7.24005	7.58452	8.31022	9.50414
sp|Q9Y219|JAG2_HUMAN	JAG2	JAG2_HUMAN Protein jagged-2	6	6.2331	7.13666	6.49561	6.36968	5.78044	5.74441	5.80888	5.91498	6.13615	5.67667	6.5908	6.60419	6.51504	6.17668	6.16043	6.65628
sp|Q9BW27|NUP85_HUMAN	NUP85	NUP85_HUMAN Nuclear pore complex protein Nup85	18	7.63677	7.48269	7.85618	7.98571	6.85866	6.55224	7.10551	6.65506	6.57007	6.04994	6.37331	6.10964	4.38075	4.89045	4.04156	3.45144
sp|Q9BQ67|GRWD1_HUMAN	GRWD1	GRWD1_HUMAN Glutamate-rich WD repeat-containing protein 1	14	6.12619	6.18911	6.32232	6.27242	6.25537	6.20018	6.47252	6.35725	6.80678	6.50387	6.8207	6.47079	6.81227	5.89445	5.76168	4.7341
sp|Q8NHP8|PLBL2_HUMAN	PLBD2	PLBL2_HUMAN Putative phospholipase B-like 2	10	5.20381	5.1021	5.24302	5.78871	5.80089	6.04269	5.84238	5.81698	6.01966	6.34413	6.03725	6.27427	7.06092	7.15483	7.50035	8.76802
sp|Q9ULE6|PALD_HUMAN	PALD1	PALD_HUMAN Paladin	24	6.52127	6.82981	6.34585	6.27968	6.40205	6.48894	6.53739	6.50122	6.64633	6.65995	6.3119	6.49788	6.07251	5.73719	5.24816	4.91987
sp|P11717|MPRI_HUMAN	IGF2R	MPRI_HUMAN Cation-independent mannose-6-phosphate receptor	97	5.54303	5.34343	5.32029	5.50514	5.76139	5.93814	5.55512	5.81009	5.97688	6.299	5.88602	6.15046	7.31492	7.21662	8.01005	8.36941
sp|P15927-3|RFA2_HUMAN	RPA2	RFA2_HUMAN Isoform 3 of Replication protein A 32 kDa subunit	14	5.73871	5.88123	6.02127	5.43273	6.60073	6.20831	6.39276	5.94618	6.79894	6.32434	6.3039	6.27281	7.54606	6.33737	6.59152	5.60313
sp|Q8IXH7|NELFD_HUMAN	NELFCD	NELFD_HUMAN Negative elongation factor C/D	14	7.65791	6.72551	7.96727	7.75951	6.90263	6.93558	7.35428	7.13203	6.93767	6.21243	6.34062	6.43444	3.98393	4.85489	3.65823	3.14306
sp|P26358-2|DNMT1_HUMAN	DNMT1	DNMT1_HUMAN Isoform 2 of DNA (cytosine-5)-methyltransferase 1	99	6.68324	6.59399	6.53543	6.58364	6.27082	6.17516	6.2282	5.99814	6.11315	5.80095	6.17647	5.9596	5.91223	5.61968	6.92002	6.42928
sp|P61247|RS3A_HUMAN	RPS3A	RS3A_HUMAN 40S ribosomal protein S3a	69	6.52272	6.67504	6.16009	6.19156	6.2201	5.90345	6.08433	5.84172	5.86841	5.54661	5.93826	5.65782	6.23663	6.33638	7.4396	7.37727
sp|Q6ZRQ5|MMS22_HUMAN	MMS22L	MMS22_HUMAN Protein MMS22-like	10	7.60685	7.70722	8.00663	7.78788	6.46973	6.34871	6.67297	6.39735	5.96198	5.85205	6.5527	6.16772	4.36756	5.37366	4.29804	4.42895
sp|Q6PI48|SYDM_HUMAN	DARS2	SYDM_HUMAN Aspartate--tRNA ligase, mitochondrial	28	8.28244	8.47672	8.3391	8.32232	7.07782	6.8545	7.30406	6.93888	6.35708	5.74689	6.55412	5.64089	3.76086	4.50887	3.18808	2.64738
sp|Q9NSU2|TREX1_HUMAN	TREX1	TREX1_HUMAN Three prime repair exonuclease 1	1	4.80792	4.06413	6.00219	6.37064	6.0876	7.03287	6.71632	6.26291	7.22392	7.19278	5.89635	5.76666	6.05753	6.75742	7.22208	6.53868
sp|Q99797|MIPEP_HUMAN	MIPEP	MIPEP_HUMAN Mitochondrial intermediate peptidase	33	5.45538	5.67975	5.60651	5.58218	6.45895	6.51574	6.39898	6.34311	6.53914	6.55146	6.71188	6.42627	7.07269	6.33191	6.49668	5.82936
sp|Q9HBU6|EKI1_HUMAN	ETNK1	EKI1_HUMAN Ethanolamine kinase 1	10	5.49733	5.65003	5.82174	5.41805	6.51373	6.93542	7.23197	6.99231	7.2589	7.93017	7.77613	7.01901	5.90554	5.16103	4.82124	4.06739
sp|Q9NVF9-2|EKI2_HUMAN	ETNK2	EKI2_HUMAN Isoform 2 of Ethanolamine kinase 2	1	6.94398	6.96269	6.87488	6.92485	5.98095	6.63724	6.96142	5.9508	6.90403	6.81696	7.24083	6.52083	5.65645	5.48791	4.3398	3.79637
sp|Q9NVN8|GNL3L_HUMAN	GNL3L	GNL3L_HUMAN Guanine nucleotide-binding protein-like 3-like protein	15	9.43912	9.73472	9.65742	9.9407	5.95071	5.86915	6.42334	6.13065	5.30176	5.13854	5.26291	5.132	3.41354	5.7618	3.50167	3.34196
sp|Q9BVP2|GNL3_HUMAN	GNL3	GNL3_HUMAN Guanine nucleotide-binding protein-like 3	20	8.50216	7.61777	8.73457	8.59378	6.52022	6.14052	6.67441	6.39904	5.95562	5.42004	5.97454	5.2228	4.36443	5.97036	4.13914	3.77062
sp|Q16854|DGUOK_HUMAN	DGUOK	DGUOK_HUMAN Deoxyguanosine kinase, mitochondrial	9	4.94994	5.51703	5.00399	4.83929	5.79407	5.78442	5.22963	5.80481	5.79675	6.28579	5.40684	6.00383	7.58086	7.55321	8.83759	9.61195
sp|P42898|MTHR_HUMAN	MTHFR	MTHR_HUMAN Methylenetetrahydrofolate reductase	5	6.92197	6.93938	6.99248	7.237	6.18864	5.88169	6.30065	5.64027	6.61545	6.38275	6.05937	6.29571	5.80214	6.06432	5.70636	4.97182
sp|O94964-2|SOGA1_HUMAN	SOGA1	SOGA1_HUMAN Isoform 2 of Protein SOGA1	10	8.62364	8.90371	8.59639	8.67474	6.39857	6.50281	6.81154	6.38995	5.84511	5.30611	5.84848	5.60596	3.85722	5.31866	3.61992	3.69721
sp|Q9Y4B5|SOGA2_HUMAN	SOGA2	SOGA2_HUMAN Protein SOGA2	7	7.43628	7.8438	7.78432	8.01317	6.44201	6.27821	6.20137	6.05994	6.30473	5.69896	5.79802	5.69911	5.27634	5.56634	4.63797	4.95944
sp|Q86UA1|PRP39_HUMAN	PRPF39	PRP39_HUMAN Pre-mRNA-processing factor 39	17	6.53329	6.71108	6.59133	6.23957	7.12066	6.47372	6.98549	6.4624	7.27316	6.48843	6.87132	6.84156	5.85187	5.15671	4.30383	4.09558
sp|P49368|TCPG_HUMAN	CCT3	TCPG_HUMAN T-complex protein 1 subunit gamma	120	6.51309	6.2668	6.33559	6.32235	6.75588	6.34008	6.58421	6.25822	6.94778	6.44722	6.59436	6.46407	6.65532	5.58702	5.50481	4.4232
sp|P49915|GUAA_HUMAN	GMPS	GUAA_HUMAN GMP synthase [glutamine-hydrolyzing]	63	5.26139	5.19798	5.34027	5.19397	6.39954	6.2165	6.37903	6.31756	6.82901	6.67181	6.62296	6.44474	7.72807	6.58854	6.86729	5.94133
sp|O15067|PUR4_HUMAN	PFAS	PUR4_HUMAN Phosphoribosylformylglycinamidine synthase	42	5.27503	5.0824	5.28463	5.22887	6.43314	6.22369	6.1764	6.22509	6.56031	6.71667	6.53322	6.37123	7.69859	6.67787	7.12919	6.38367
sp|Q9NPH2|INO1_HUMAN	ISYNA1	INO1_HUMAN Inositol-3-phosphate synthase 1	24	5.15594	5.60562	5.27874	5.38352	5.83093	6.55776	5.59835	5.99035	5.69639	6.54591	6.38098	6.4262	6.47651	7.12778	7.53342	8.41161
sp|Q9UKX7|NUP50_HUMAN	NUP50	NUP50_HUMAN Nuclear pore complex protein Nup50	29	5.09288	5.54787	4.84463	5.23984	5.26513	5.60818	5.01764	5.4599	5.46787	6.35809	5.28897	6.07119	7.66708	8.27259	8.96246	9.83568
sp|P00491|PNPH_HUMAN	PNP	PNPH_HUMAN Purine nucleoside phosphorylase	48	4.79641	4.92842	4.73018	5.02936	5.41623	6.04832	5.2539	5.74953	5.73665	6.4313	5.75082	6.46236	7.5413	7.92991	8.47211	9.7232
sp|O95373|IPO7_HUMAN	IPO7	IPO7_HUMAN Importin-7	41	7.49889	6.65583	7.3236	7.32292	6.9262	6.60389	7.12186	6.80182	6.54426	6.33881	6.85402	6.18467	4.99985	4.93217	4.25264	3.63857
sp|O15397|IPO8_HUMAN	IPO8	IPO8_HUMAN Importin-8	9	7.7741	7.44284	8.305	7.90548	6.88684	6.51215	7.33338	6.94094	6.39733	6.2229	6.3703	6.05821	4.08914	4.76212	3.64235	3.35692
sp|P61163|ACTZ_HUMAN	ACTR1A	ACTZ_HUMAN Alpha-centractin	28	5.79673	6.10168	5.54501	5.41357	6.18432	5.88811	5.97232	5.79614	6.27896	5.71115	6.24519	6.01761	7.67117	6.09319	8.27426	7.01059
sp|P42025|ACTY_HUMAN	ACTR1B	ACTY_HUMAN Beta-centractin	4	5.22101	4.6699	6.07127	5.62871	6.64187	6.19759	6.406	5.39444	7.11413	6.44206	6.50361	6.0241	7.10525	5.72155	8.25837	6.60014
sp|Q9Y6D9|MD1L1_HUMAN	MAD1L1	MD1L1_HUMAN Mitotic spindle assembly checkpoint protein MAD1	11	7.30889	7.44969	7.17812	7.05902	6.8476	6.93144	6.8768	6.9037	6.57905	6.15211	6.73941	6.19153	4.85029	4.70026	4.56226	3.66984
sp|Q13191|CBLB_HUMAN	CBLB	CBLB_HUMAN E3 ubiquitin-protein ligase CBL-B	5	6.36215	5.98877	5.8494	6.22699	6.2067	5.27041	5.53414	5.21403	7.15695	6.19804	5.1742	6.33817	7.72772	6.78429	6.94307	7.02497
sp|P22681|CBL_HUMAN	CBL	CBL_HUMAN E3 ubiquitin-protein ligase CBL	31	5.10214	5.28119	5.0523	5.03972	6.14604	5.90494	5.83287	5.92315	6.38492	6.0924	6.2539	6.3859	7.5668	7.13478	7.89983	7.99912
sp|Q9ULV8|CBLC_HUMAN	CBLC	CBLC_HUMAN E3 ubiquitin-protein ligase CBL-C	2	5.88567	6.24166	5.58323	6.02786	6.7385	6.16188	6.26407	6.075	6.47471	6.83883	6.54229	6.69848	6.62946	5.75513	6.05203	6.0312
sp|Q9H8Y8|GORS2_HUMAN	GORASP2	GORS2_HUMAN Golgi reassembly-stacking protein 2	19	5.54373	5.21029	5.36193	5.43752	6.32713	6.01151	6.10238	6.15098	6.59473	6.55544	6.12262	6.18014	7.69917	6.86644	7.06136	6.77463
sp|Q9NWZ5|UCKL1_HUMAN	UCKL1	UCKL1_HUMAN Uridine-cytidine kinase-like 1	5	6.68581	6.92275	6.97392	6.74964	6.27088	6.97016	6.56238	7.22544	5.44189	6.26467	6.46164	6.41911	5.09792	5.50313	5.00773	5.44294
sp|Q9NZJ4|SACS_HUMAN	SACS	SACS_HUMAN Sacsin	37	9.88308	9.93271	10.1644	10.3707	6.0931	6.04516	6.76533	6.57031	5.23872	4.91508	5.37915	4.98454	2.95266	5.26328	2.85283	2.58895
sp|Q9BYX2|TBD2A_HUMAN	TBC1D2	TBD2A_HUMAN TBC1 domain family member 2A	15	8.03925	7.29501	7.91685	8.1027	6.81866	6.78869	7.02454	6.72979	6.68503	5.92407	6.18791	6.15774	4.22998	4.68828	3.86887	3.54263
sp|P52298|NCBP2_HUMAN	NCBP2	NCBP2_HUMAN Nuclear cap-binding protein subunit 2	8	6.85701	7.09704	6.80095	6.7054	6.85776	6.23956	6.96861	6.68653	6.97417	6.67167	6.81605	6.48725	5.71842	5.134	4.41661	3.56898
sp|Q9H8V3-3|ECT2_HUMAN	ECT2	ECT2_HUMAN Isoform 3 of Protein ECT2	10	9.60119	9.76886	9.68484	9.77507	6.53793	6.35318	7.12466	6.39432	5.59847	5.28192	6.009	5.38698	3.15834	4.63841	2.59523	2.09162
sp|O75477|ERLN1_HUMAN	ERLIN1	ERLN1_HUMAN Erlin-1	18	9.43228	8.33745	9.77016	9.30794	7.12165	7.1285	7.94888	7.42865	6.07317	5.44053	5.88662	5.52637	2.6654	4.10505	2.10786	1.71951
sp|O94905|ERLN2_HUMAN	ERLIN2	ERLN2_HUMAN Erlin-2	6	7.10065	7.55529	7.08285	7.08284	5.91591	6.18322	6.26673	6.39945	5.81969	5.51482	5.79661	6.05739	5.52616	6.05082	5.79688	5.85069
sp|Q7Z2K8|GRIN1_HUMAN	GPRIN1	GRIN1_HUMAN G protein-regulated inducer of neurite outgrowth 1	19	5.27099	5.89506	5.22433	5.37076	5.75743	5.81089	5.35315	5.7971	5.94292	6.37062	5.90259	6.36522	7.16324	7.30495	7.85221	8.61853
sp|Q9HBZ2|ARNT2_HUMAN	ARNT2	ARNT2_HUMAN Aryl hydrocarbon receptor nuclear translocator 2	1	5.53626	5.86457	6.11893	5.77426	6.42136	5.97445	5.96521	5.87582	6.88912	5.69207	6.19416	6.83917	6.8041	5.80963	7.40997	6.8309
sp|O60344|ECE2_HUMAN	ECE2	ECE2_HUMAN Endothelin-converting enzyme 2	7	5.77147	6.09503	5.86952	5.69449	6.36771	5.83708	5.94752	5.94443	6.84181	6.10666	6.47243	6.27031	7.85904	6.98982	6.40273	5.52995
sp|P42892|ECE1_HUMAN	ECE1	ECE1_HUMAN Endothelin-converting enzyme 1	30	4.90104	4.6807	5.04453	5.30094	5.54082	6.14517	5.67274	5.76889	5.7904	6.51685	6.18585	6.67721	7.21903	7.76529	8.10966	8.68088
sp|P63027|VAMP2_HUMAN	VAMP2	VAMP2_HUMAN Vesicle-associated membrane protein 2	3	4.41087	3.08755	4.92843	5.11109	6.10151	7.26983	6.66838	7.21443	5.93075	7.69605	6.86285	6.19856	6.73214	6.97497	6.75899	8.0536
sp|Q6NYC1-3|JMJD6_HUMAN	JMJD6	JMJD6_HUMAN Isoform 3 of Bifunctional arginine demethylase and lysyl-hydroxylase JMJD6	27	5.77043	5.74393	5.79212	5.76781	6.21866	6.00226	5.95996	6.02414	6.77818	6.74051	6.31659	6.70205	7.03187	6.45666	6.75724	5.93758
sp|Q8NC60|NOA1_HUMAN	NOA1	NOA1_HUMAN Nitric oxide-associated protein 1	12	7.56488	7.58592	8.00681	7.86962	6.79454	6.41457	7.24276	6.36848	6.60985	6.24412	6.64158	6.16953	4.68659	4.84363	3.86881	3.0883
sp|O95433|AHSA1_HUMAN	AHSA1	AHSA1_HUMAN Activator of 90 kDa heat shock protein ATPase homolog 1	41	6.89917	6.06562	6.86482	6.9956	6.98803	6.59003	6.9692	6.94388	6.91118	6.63016	6.76325	6.44512	5.3931	5.09259	4.60861	3.83964
sp|Q5T3U5|MRP7_HUMAN	ABCC10	MRP7_HUMAN Multidrug resistance-associated protein 7	4	6.46231	6.02816	6.03885	6.27665	6.07951	6.05423	6.21976	6.02414	6.08676	6.55282	5.96148	6.65769	6.32907	6.15323	6.15243	6.92292
sp|P49411|EFTU_HUMAN	TUFM	EFTU_HUMAN Elongation factor Tu, mitochondrial	77	6.98218	6.47122	7.12081	6.66662	7.36485	6.2268	7.31713	6.62727	7.27429	6.1419	7.15481	6.09531	5.92752	4.88041	4.58156	3.16732
sp|P42704|LPPRC_HUMAN	LRPPRC	LPPRC_HUMAN Leucine-rich PPR motif-containing protein, mitochondrial	143	8.41552	8.23544	8.32618	8.18296	7.34206	6.74639	7.52152	7.10817	6.47784	6.03621	6.60384	5.95047	3.5454	4.18146	2.93592	2.39063
sp|Q9NP80|PLPL8_HUMAN	PNPLA8	PLPL8_HUMAN Calcium-independent phospholipase A2-gamma	5	7.33993	3.97663	7.35761	7.41425	6.67935	6.40917	7.49087	6.78831	6.4702	6.46355	7.31271	6.9381	5.40107	5.00339	4.42438	4.53047
sp|Q9NX00|TM160_HUMAN	TMEM160	TM160_HUMAN Transmembrane protein 160	3	6.38629	7.05113	5.49262	6.27652	6.41336	6.5796	6.33103	6.42656	6.09614	6.1807	5.80251	6.05916	6.06205	7.10502	5.76321	5.97408
sp|O43747-2|AP1G1_HUMAN	AP1G1	AP1G1_HUMAN Isoform 2 of AP-1 complex subunit gamma-1	43	5.18587	4.82631	5.27738	5.17899	6.20441	6.45974	6.3227	6.29802	6.31463	6.73209	6.58812	6.31755	7.44938	6.72954	7.16443	6.95083
sp|O75843|AP1G2_HUMAN	AP1G2	AP1G2_HUMAN AP-1 complex subunit gamma-like 2	8	7.13077	8.18927	7.31347	7.54469	6.63747	6.48791	7.207	6.60563	7.00678	6.65805	6.73093	6.53615	4.2943	4.75666	3.74976	3.15118
sp|Q13123|RED_HUMAN	IK	RED_HUMAN Protein Red	13	9.67834	9.74084	9.4722	9.54857	6.47019	6.28283	6.7396	6.60846	5.51851	5.14904	5.37902	5.30072	3.15225	4.98003	3.13623	2.84319
sp|Q14517|FAT1_HUMAN	FAT1	FAT1_HUMAN Protocadherin Fat 1	119	7.61717	7.41779	7.63873	7.69644	6.87518	6.61983	7.05882	6.76367	6.59706	6.17836	6.50423	6.11262	4.58678	4.93847	3.89237	3.50248
sp|Q9Y3A3|PHOCN_HUMAN	MOB4	PHOCN_HUMAN MOB-like protein phocein	10	5.17994	6.39493	5.08164	5.50789	5.39718	5.78804	5.37262	5.70821	5.67199	6.23973	5.59702	6.46711	7.09316	7.34387	7.77506	9.38161
sp|P61604|CH10_HUMAN	HSPE1	CH10_HUMAN 10 kDa heat shock protein, mitochondrial	148	5.01185	5.38156	4.78079	4.99461	5.61467	5.77246	5.13446	5.60723	6.00687	6.37465	5.67855	6.40846	7.80158	8.01849	7.50341	9.91035
sp|P22307|NLTP_HUMAN	SCP2	NLTP_HUMAN Non-specific lipid-transfer protein	50	4.87014	4.86549	4.73352	4.83904	5.61804	6.11276	5.4736	5.78609	5.78137	6.40218	6.02043	6.45363	7.57236	7.79838	8.45368	9.2193
sp|Q9NS00|C1GLT_HUMAN	C1GALT1	C1GLT_HUMAN Glycoprotein-N-acetylgalactosamine 3-beta-galactosyltransferase 1	7	6.82408	6.99095	6.80076	6.34202	6.86395	6.57047	6.64593	6.51748	7.14616	6.34062	6.58801	6.43078	5.70243	5.2544	4.88498	4.09697
sp|Q5VWQ0|RSBN1_HUMAN	RSBN1	RSBN1_HUMAN Round spermatid basic protein 1	5	5.63026	5.80902	5.76874	6.03546	5.70247	6.27081	5.84273	5.97503	5.93245	6.24044	6.35027	6.73692	6.75159	7.01486	7.35638	6.58258
sp|Q9H9E3|COG4_HUMAN	COG4	COG4_HUMAN Conserved oligomeric Golgi complex subunit 4	17	8.1272	8.2024	8.69474	8.63721	6.77544	6.65725	7.07745	6.799	6.57362	5.99611	6.28861	6.23799	3.54444	4.52447	3.09978	2.76428
sp|Q9Y2U9|KLDC2_HUMAN	KLHDC2	KLDC2_HUMAN Kelch domain-containing protein 2	3	7.94296	6.48618	7.45624	8.3334	6.475	5.89011	6.85123	6.75786	6.33892	6.16783	6.77659	6.35051	5.04922	4.88919	4.18863	4.04613
sp|O75821|EIF3G_HUMAN	EIF3G	EIF3G_HUMAN Eukaryotic translation initiation factor 3 subunit G	31	8.08358	6.47387	7.984	8.18674	6.36673	5.92629	6.59465	6.18385	6.05957	5.43447	5.55867	5.78395	4.70001	5.71275	5.44044	5.51043
tr|K7ER90|K7ER90_HUMAN	EIF3G	K7ER90_HUMAN Eukaryotic translation initiation factor 3 subunit G (Fragment)	2	6.09876	26.2143	6.15437	3.167	4.92292	6.91371	5.32551	4.32083	5.72557	4.41592	4.92755	4.46804	5.061	4.54328	3.66425	4.07698
sp|Q96HA7-2|TONSL_HUMAN	TONSL	TONSL_HUMAN Isoform 2 of Tonsoku-like protein	5	9.10096	8.9689	9.1573	9.60018	5.85705	5.59744	6.7499	6.03029	6.26734	5.57897	5.40349	5.7403	3.99216	5.07677	3.72595	3.153
sp|Q96C86|DCPS_HUMAN	DCPS	DCPS_HUMAN m7GpppX diphosphatase	13	5.01309	5.25501	4.87173	4.7296	5.7579	5.88336	5.58453	5.84178	6.10412	6.44997	5.82609	6.39175	8.14538	7.65047	8.22671	8.26852
sp|Q15370|ELOB_HUMAN	TCEB2	ELOB_HUMAN Transcription elongation factor B polypeptide 2	19	5.00856	5.11077	4.89065	5.00112	6.09506	6.01753	5.62935	5.87876	6.20362	6.73161	6.03191	6.3267	8.25733	7.81569	6.95288	8.04847
sp|Q9P2B2|FPRP_HUMAN	PTGFRN	FPRP_HUMAN Prostaglandin F2 receptor negative regulator	38	4.94093	4.85716	4.87584	5.24527	5.37703	5.82654	5.14999	5.64168	5.78526	6.43661	5.70284	6.38395	7.49584	7.79203	8.51881	9.97022
sp|Q9Y3Z3|SAMH1_HUMAN	SAMHD1	SAMH1_HUMAN Deoxynucleoside triphosphate triphosphohydrolase SAMHD1	27	7.52803	7.03336	7.88096	7.50264	6.68958	6.24459	6.90909	6.38395	6.74003	6.09171	6.25558	6.12178	4.99622	5.16697	4.39695	4.05856
sp|P20749|BCL3_HUMAN	BCL3	BCL3_HUMAN B-cell lymphoma 3 protein	2	6.16413	5.65396	6.45636	6.55779	6.80214	7.13928	7.73481	6.54532	6.88264	6.18402	6.47753	7.01903	6.96777	5.32972	4.50117	3.58435
sp|P48739-2|PIPNB_HUMAN	PITPNB	PIPNB_HUMAN Isoform 2 of Phosphatidylinositol transfer protein beta isoform	45	4.91008	5.27944	4.81691	5.09783	5.39796	5.70029	5.09513	5.55622	5.90313	6.28723	5.51093	6.1917	7.7592	8.03597	8.65915	9.79883
sp|Q00169|PIPNA_HUMAN	PITPNA	PIPNA_HUMAN Phosphatidylinositol transfer protein alpha isoform	22	4.98273	5.24498	4.94787	5.07886	5.27785	5.62943	4.99875	5.38164	5.71989	6.39629	5.58472	6.44748	7.73154	7.98265	8.72557	9.86974
sp|P61970|NTF2_HUMAN	NUTF2	NTF2_HUMAN Nuclear transport factor 2	21	5.05461	5.75663	5.68156	5.93977	6.78802	7.62033	7.0724	7.04297	5.42352	6.62156	7.54181	6.32539	6.38108	5.55766	4.88636	6.30634
sp|Q9H4E7|DEFI6_HUMAN	DEF6	DEFI6_HUMAN Differentially expressed in FDCP 6 homolog	17	7.13148	7.48248	7.28961	7.00977	7.1396	6.52927	7.12727	6.83384	7.3241	6.50361	7.00073	6.59144	4.76384	4.61244	3.69691	2.9636
sp|Q9BSC4|NOL10_HUMAN	NOL10	NOL10_HUMAN Nucleolar protein 10	4	7.60141	7.78428	7.48756	7.19601	7.35392	6.71653	6.81613	7.1887	7.43958	6.50391	6.54919	5.93956	4.78562	4.3113	3.27875	3.04756
sp|Q9NPD8|UBE2T_HUMAN	UBE2T	UBE2T_HUMAN Ubiquitin-conjugating enzyme E2 T	13	4.96429	5.04501	4.86002	5.01536	5.77572	5.7364	5.33848	6.03288	5.94724	6.23853	5.66424	6.06453	7.26592	8.24296	8.48693	9.32149
sp|Q06830|PRDX1_HUMAN	PRDX1	PRDX1_HUMAN Peroxiredoxin-1	246	5.01769	5.0695	4.90825	5.11072	5.54795	5.79303	5.2908	5.70179	5.64067	6.16843	5.97979	6.38376	7.43788	7.85031	8.45054	9.64889
sp|P32119|PRDX2_HUMAN	PRDX2	PRDX2_HUMAN Peroxiredoxin-2	67	4.94089	4.82404	4.66526	5.13876	5.32545	5.58008	4.77992	5.33741	5.72432	6.24367	5.19257	6.26083	8.05606	8.40652	8.80052	10.7237
sp|Q13162|PRDX4_HUMAN	PRDX4	PRDX4_HUMAN Peroxiredoxin-4	75	4.89915	5.25224	4.95766	5.16602	5.39386	5.57182	4.91841	5.36719	5.74336	6.34315	5.6434	6.41384	7.61243	8.00175	8.7113	10.0044
sp|Q96BI3|APH1A_HUMAN	APH1A	APH1A_HUMAN Gamma-secretase subunit APH-1A	1	7.83368	7.63703	7.87741	7.71932	6.49124	6.18684	6.71861	6.0631	7.16618	5.83457	6.02794	5.95094	5.64762	4.87261	4.2127	3.76021
sp|P39880-3|CUX1_HUMAN	CUX1	CUX1_HUMAN Isoform 3 of Homeobox protein cut-like 1	19	6.32389	6.54712	6.54253	6.68586	6.17746	5.97682	5.91993	6.16783	6.15704	6.27469	6.03312	6.45054	6.1435	6.24464	6.28619	6.06884
sp|Q13948|CASP_HUMAN	CUX1	CASP_HUMAN Protein CASP	4	7.2041	6.75636	7.53186	7.63442	6.3574	6.76907	6.73447	6.3789	6.64743	6.03375	6.35416	6.4855	4.76215	5.42057	4.63183	4.29803
sp|Q13232|NDK3_HUMAN	NME3	NDK3_HUMAN Nucleoside diphosphate kinase 3	6	5.39603	6.21123	4.80752	5.31695	5.71911	5.71249	5.51412	5.83873	6.22092	6.15155	5.45147	6.41103	7.172	7.34976	7.70423	9.02288
sp|Q9H4A3-6|WNK1_HUMAN	WNK1	WNK1_HUMAN Isoform 5 of Serine/threonine-protein kinase WNK1	34	5.67339	5.52371	5.6682	5.72423	6.21796	6.21182	6.12477	6.17286	6.45554	6.37848	6.29564	6.40574	7.00778	6.44996	7.10831	6.5816
sp|Q9Y3S1|WNK2_HUMAN	WNK2	WNK2_HUMAN Serine/threonine-protein kinase WNK2	8	5.97859	7.31322	6.21761	6.78702	6.14317	5.789	6.06289	6.07673	6.11565	6.30443	5.93798	6.48567	6.355	6.16663	6.11589	6.15052
sp|Q86UV5|UBP48_HUMAN	USP48	UBP48_HUMAN Ubiquitin carboxyl-terminal hydrolase 48	23	7.57779	7.75393	7.67	7.71752	6.87954	6.41254	6.86461	6.53348	6.67532	6.32984	6.65042	6.28821	4.49541	4.98801	3.94684	3.21655
sp|P25786-2|PSA1_HUMAN	PSMA1	PSA1_HUMAN Isoform Long of Proteasome subunit alpha type-1	52	5.05678	5.68173	4.84025	5.03926	5.5115	5.9877	5.2701	5.7278	5.64771	6.42942	5.6054	6.29691	7.35169	7.65423	8.30885	9.5907
sp|Q8N201|INT1_HUMAN	INTS1	INT1_HUMAN Integrator complex subunit 1	27	9.08112	8.7731	9.12928	9.36807	6.73525	6.46668	7.33272	6.83352	5.9553	5.71687	6.21152	5.48452	3.12927	4.4763	2.82392	2.48256
sp|P53396|ACLY_HUMAN	ACLY	ACLY_HUMAN ATP-citrate synthase	142	5.67623	5.5187	5.67031	5.49456	6.68326	6.29294	6.52443	6.28644	6.95179	6.57689	6.83068	6.35788	7.41129	6.10606	6.33047	5.28808
sp|P53396-2|ACLY_HUMAN	ACLY	ACLY_HUMAN Isoform 2 of ATP-citrate synthase	2	5.98586	4.87523	5.75263	5.92809	5.89778	5.5817	5.47406	5.96209	7.61629	6.82975	5.53865	6.62798	8.389	7.35843	6.48037	5.70209
sp|O43815|STRN_HUMAN	STRN	STRN_HUMAN Striatin	25	5.96981	5.52395	6.01045	5.96587	6.57087	6.58136	6.72822	6.64534	6.62476	6.68583	7.05138	6.70969	6.5053	5.51116	5.78916	5.12685
sp|Q9NRL3|STRN4_HUMAN	STRN4	STRN4_HUMAN Striatin-4	9	6.43898	6.63742	6.84656	6.60783	6.84882	6.39457	6.92044	6.61968	7.01836	6.51544	6.95752	6.69927	5.7076	5.16651	4.68464	3.93636
sp|Q13033|STRN3_HUMAN	STRN3	STRN3_HUMAN Striatin-3	22	6.08466	7.16945	6.09646	6.00356	6.6952	6.45178	6.39083	6.48395	6.63762	6.63033	6.69141	6.47041	6.14445	5.69527	5.58332	4.77131
sp|Q13033-2|STRN3_HUMAN	STRN3	STRN3_HUMAN Isoform Alpha of Striatin-3	1	6.95097	7.31143	6.34721	6.04483	6.53361	5.7601	6.31571	5.64991	7.42684	7.45949	5.91682	5.76826	6.27689	6.29265	5.36067	4.58459
sp|O75643|U520_HUMAN	SNRNP200	U520_HUMAN U5 small nuclear ribonucleoprotein 200 kDa helicase	110	9.75802	9.43725	9.37878	9.49451	6.85424	6.354	6.98182	6.63228	5.7868	5.21819	5.82291	5.35837	3.11175	4.52951	2.81164	2.46993
sp|Q8IY37|DHX37_HUMAN	DHX37	DHX37_HUMAN Probable ATP-dependent RNA helicase DHX37	11	9.31212	9.20462	9.80122	9.73772	5.8396	5.71081	6.59092	5.73236	5.42965	5.13978	5.53226	5.22399	4.00915	6.04989	3.48889	3.19701
sp|P14868|SYDC_HUMAN	DARS	SYDC_HUMAN Aspartate--tRNA ligase, cytoplasmic	61	8.26147	8.18699	8.31582	8.16333	7.04673	6.47968	7.26722	6.77004	6.572	5.87685	6.53677	5.80712	4.07573	4.50494	3.39632	2.73898
sp|Q92791|SC65_HUMAN	LEPREL4	SC65_HUMAN Synaptonemal complex protein SC65	8	7.13099	7.30243	7.39196	7.79748	6.58897	6.40936	7.07907	6.70925	6.52024	6.21446	7.02181	6.16058	4.66288	4.99182	4.2834	3.73528
sp|P11498|PYC_HUMAN	PC	PYC_HUMAN Pyruvate carboxylase, mitochondrial	13	7.8491	7.36795	7.98268	8.10008	7.10267	6.32624	7.22538	6.89637	6.6832	5.90394	6.60059	6.05743	4.27171	4.67771	3.79411	3.16084
sp|Q12802-2|AKP13_HUMAN	AKAP13	AKP13_HUMAN Isoform 2 of A-kinase anchor protein 13	29	6.5533	6.9552	6.68766	6.72815	5.94669	6.04003	5.94774	5.98663	5.88938	5.91823	6.185	6.19772	5.89576	6.50155	6.27709	6.28985
sp|Q9UL12|SARDH_HUMAN	SARDH	SARDH_HUMAN Sarcosine dehydrogenase, mitochondrial	2	6.05368	7.29771	6.24874	5.50563	6.25089	6.40919	5.52652	5.56779	6.71111	6.01301	5.1218	6.36025	6.71602	7.15414	6.16898	6.89452
sp|Q9NZ09-4|UBAP1_HUMAN	UBAP1	UBAP1_HUMAN Isoform 4 of Ubiquitin-associated protein 1	11	5.83434	6.46237	5.68489	5.79667	6.48067	6.01405	5.78335	5.84854	6.34696	5.84362	6.20871	6.33124	7.06225	6.6403	6.45781	7.20422
sp|Q96Q15|SMG1_HUMAN	SMG1	SMG1_HUMAN Serine/threonine-protein kinase SMG1	23	8.05667	7.69642	7.9444	7.8089	6.40347	6.45296	6.70347	6.43111	6.08648	5.92505	6.21059	5.7132	4.58565	5.38755	4.4124	4.18168
sp|P61803|DAD1_HUMAN	DAD1	DAD1_HUMAN Dolichyl-diphosphooligosaccharide--protein glycosyltransferase subunit DAD1	2	5.01765	5.74411	5.3682	5.37402	6.4312	5.61074	5.07415	5.34327	5.98815	5.35824	5.36995	5.56043	7.26981	7.42452	11.0364	8.02913
sp|O60346|PHLP1_HUMAN	PHLPP1	PHLP1_HUMAN PH domain leucine-rich repeat-containing protein phosphatase 1	3	6.86064	7.1941	6.46333	6.70438	6.48666	6.1533	6.49854	6.46897	6.56325	6.49336	6.70119	6.4495	5.79673	5.3348	5.52746	4.30379
sp|P35237|SPB6_HUMAN	SERPINB6	SPB6_HUMAN Serpin B6	28	6.60822	6.60685	6.71911	6.77342	6.62938	6.90419	6.95116	6.84908	6.69534	6.89535	7.1448	6.56422	5.07011	5.17634	4.45384	3.95859
sp|P50452|SPB8_HUMAN	SERPINB8	SPB8_HUMAN Serpin B8	3	5.58422	5.22428	5.12443	5.56668	5.77292	6.39464	5.89098	6.32046	6.2399	6.41582	6.81209	6.66469	6.50776	6.65412	6.76147	8.06553
sp|P50453|SPB9_HUMAN	SERPINB9	SPB9_HUMAN Serpin B9	23	6.77621	6.8095	7.00551	6.94366	7.03598	6.79825	7.21221	7.05036	6.81412	6.48516	7.14765	6.44178	4.98636	4.71523	4.12906	3.64895
sp|P30740|ILEU_HUMAN	SERPINB1	ILEU_HUMAN Leukocyte elastase inhibitor	25	7.72716	7.2747	7.42646	7.255	7.26832	6.75679	7.10001	7.09461	6.96894	6.41982	6.73007	6.30118	4.29987	4.56326	3.71415	3.09966
sp|P49916|DNLI3_HUMAN	LIG3	DNLI3_HUMAN DNA ligase 3	17	9.47575	9.98208	9.39159	9.75109	6.59585	6.10896	6.6812	6.25385	5.44508	5.0662	5.63095	5.16127	3.45644	5.06662	3.10296	2.8301
sp|Q14318-2|FKBP8_HUMAN	FKBP8	FKBP8_HUMAN Isoform 2 of Peptidyl-prolyl cis-trans isomerase FKBP8	16	7.05944	7.4786	7.08731	6.91666	6.62304	6.33075	6.81143	6.38146	6.71434	6.3538	6.60916	6.27086	5.36688	5.11931	4.62777	4.2492
sp|Q96F63|CCD97_HUMAN	CCDC97	CCD97_HUMAN Coiled-coil domain-containing protein 97	6	5.34914	5.34075	5.499	5.49884	6.11187	6.09468	5.58096	5.72088	6.06429	6.17996	6.39983	6.38155	7.03942	7.10802	7.31525	8.31557
sp|P17535|JUND_HUMAN	JUND	JUND_HUMAN Transcription factor jun-D	3	4.94006	5.67777	4.55656	4.82583	5.85438	6.50889	6.10542	6.36538	6.26272	6.25357	6.80943	5.96196	7.80485	6.7793	7.62397	7.66993
sp|P17275|JUNB_HUMAN	JUNB	JUNB_HUMAN Transcription factor jun-B	6	5.75463	5.89758	5.39356	5.50278	5.95093	5.94427	5.80438	5.97894	5.83091	6.04323	6.20821	6.14952	6.94205	6.87247	7.87145	7.85508
sp|Q9Y394|DHRS7_HUMAN	DHRS7	DHRS7_HUMAN Dehydrogenase/reductase SDR family member 7	14	7.38256	7.92193	7.21224	7.1477	6.8118	6.62116	7.09534	6.6951	6.48727	6.27264	6.86723	6.19047	4.83588	4.7649	4.10383	3.58994
sp|Q9C0D5|TANC1_HUMAN	TANC1	TANC1_HUMAN Protein TANC1	15	7.59807	7.96428	8.22645	7.87604	6.38763	6.3608	6.60819	6.36747	6.3086	5.95207	5.99252	5.78667	4.67313	5.32891	4.20532	4.36384
sp|Q9NRF8|PYRG2_HUMAN	CTPS2	PYRG2_HUMAN CTP synthase 2	21	7.4538	7.75458	7.53822	7.50376	6.94323	6.22542	7.12501	6.67547	6.57727	6.15947	6.99291	6.37201	4.69336	4.80092	3.85909	3.32549
sp|P17812|PYRG1_HUMAN	CTPS1	PYRG1_HUMAN CTP synthase 1	33	7.53877	7.10534	7.56754	7.6004	6.9976	6.7349	7.36578	6.9775	6.90329	6.39322	7.06319	6.21143	4.50285	4.52244	3.60039	2.91536
sp|Q96A35|RM24_HUMAN	MRPL24	RM24_HUMAN 39S ribosomal protein L24, mitochondrial	9	5.36784	5.76389	5.05304	5.2878	5.45375	5.53282	5.48897	5.7346	5.93567	6.3051	5.86373	6.41828	7.32603	7.62042	8.0799	8.76817
sp|P63220|RS21_HUMAN	RPS21	RS21_HUMAN 40S ribosomal protein S21	10	6.11301	5.94088	5.98862	6.18586	5.62557	5.73333	5.82821	5.52221	5.60702	5.99034	6.12312	5.79167	6.58647	6.9474	7.95785	8.05846
sp|Q8N766|EMC1_HUMAN	EMC1	EMC1_HUMAN ER membrane protein complex subunit 1	24	8.31447	6.6757	8.16007	8.62933	6.8595	6.70709	7.28948	6.95981	6.51851	6.3687	6.56605	6.1108	4.03147	4.53262	3.416	2.8604
sp|Q6YHK3|CD109_HUMAN	CD109	CD109_HUMAN CD109 antigen	35	5.33365	5.62958	5.3452	5.3927	5.92086	5.92802	5.8266	5.90338	6.28868	6.4591	5.96551	6.33499	7.15241	7.01587	7.56839	7.93507
sp|Q9H3P2|NELFA_HUMAN	NELFA	NELFA_HUMAN Negative elongation factor A	20	6.62338	6.5455	7.02862	6.73565	6.76094	7.15342	7.45316	7.07761	6.40471	6.53293	7.11735	6.40501	4.81577	5.09211	4.35392	3.89991
sp|Q13308-6|PTK7_HUMAN	PTK7	PTK7_HUMAN Isoform 6 of Inactive tyrosine-protein kinase 7	50	5.51392	6.32537	5.54351	5.58782	6.05617	5.7894	5.78184	5.81254	6.46739	6.53893	6.04719	6.41669	7.43708	6.6573	7.15752	6.86733
sp|O14548|COX7R_HUMAN	COX7A2L	COX7R_HUMAN Cytochrome c oxidase subunit 7A-related protein, mitochondrial	6	6.44902	7.32034	7.38475	6.81692	7.10588	6.70656	6.66893	6.66305	6.01142	6.79714	6.64473	6.477	5.18168	5.00627	3.88014	4.88617
sp|Q92692|PVRL2_HUMAN	PVRL2	PVRL2_HUMAN Poliovirus receptor-related protein 2	16	4.94475	5.00574	4.96885	5.14086	5.7278	6.35892	5.55369	5.8272	5.64483	6.57529	5.98079	6.57092	7.07057	7.34834	8.10804	9.17341
sp|Q92692-2|PVRL2_HUMAN	PVRL2	PVRL2_HUMAN Isoform Alpha of Poliovirus receptor-related protein 2	2	3.73426	3.39413	5.27044	4.43123	4.89761	7.41528	6.99425	6.72455	6.15509	9.12208	8.18899	6.79126	5.00019	7.48354	7.54181	6.85527
sp|O94888|UBXN7_HUMAN	UBXN7	UBXN7_HUMAN UBX domain-containing protein 7	15	5.28626	5.48136	5.17938	5.16947	5.6826	6.15841	5.49503	5.75125	5.95924	6.35358	5.86977	6.52822	7.53636	7.25633	7.58431	8.70842
sp|O43390|HNRPR_HUMAN	HNRNPR	HNRPR_HUMAN Heterogeneous nuclear ribonucleoprotein R	52	6.75297	7.24574	6.73254	6.75287	6.48568	6.21491	6.59106	6.30071	6.48385	6.02836	6.53417	6.06945	6.02996	5.81473	5.34531	4.61769
sp|O60506|HNRPQ_HUMAN	SYNCRIP	HNRPQ_HUMAN Heterogeneous nuclear ribonucleoprotein Q	48	6.25783	6.34222	6.29145	6.07356	6.37945	6.04384	6.3714	5.98791	6.53583	6.00508	6.33999	6.21569	6.7708	6.11985	6.56333	5.70176
sp|O60506-3|HNRPQ_HUMAN	SYNCRIP	HNRPQ_HUMAN Isoform 3 of Heterogeneous nuclear ribonucleoprotein Q	1	6.66028	6.67142	5.85363	5.38564	6.72853	6.21715	6.78745	5.15223	6.22707	6.11667	7.07436	5.42319	6.19688	6.9374	7.16561	5.4025
sp|Q9NYB0|TE2IP_HUMAN	TERF2IP	TE2IP_HUMAN Telomeric repeat-binding factor 2-interacting protein 1	14	5.74891	5.78322	5.54966	5.67688	5.80101	6.11351	5.75299	6.00457	5.75442	6.24701	6.11794	6.13426	6.54475	7.07964	7.66087	8.03038
sp|P62241|RS8_HUMAN	RPS8	RS8_HUMAN 40S ribosomal protein S8	39	6.08949	6.1331	6.13549	6.28025	5.89476	5.84772	6.01377	5.95717	5.66944	5.4141	6.60548	5.72273	6.47254	6.32481	7.67139	7.76777
sp|P62333|PRS10_HUMAN	PSMC6	PRS10_HUMAN 26S protease regulatory subunit 10B	50	6.69711	6.49788	7.00285	6.68976	7.06783	6.45421	7.28855	6.62197	7.08313	6.22124	7.24972	6.60843	5.60624	4.83334	4.54046	3.53729
sp|P08238|HS90B_HUMAN	HSP90AB1	HS90B_HUMAN Heat shock protein HSP 90-beta	191	6.65513	6.56864	6.69349	6.60075	7.10399	6.6637	6.9539	6.87648	6.97782	6.55886	7.0323	6.78655	5.2923	4.80069	4.52603	3.90937
tr|Q5T9W8|Q5T9W8_HUMAN	HSP90AB1	Q5T9W8_HUMAN Heat shock protein HSP 90-beta (Fragment)	4	5.90075	13.0846	5.84914	4.86987	5.23437	5.95858	5.23941	5.83706	6.40694	6.37854	5.02525	5.9015	6.14269	6.34121	5.70279	6.12732
sp|P07900-2|HS90A_HUMAN	HSP90AA1	HS90A_HUMAN Isoform 2 of Heat shock protein HSP 90-alpha	689	6.18348	6.5072	6.33757	6.219	6.71375	6.47921	6.63585	6.51632	6.90197	6.65868	6.85811	6.63668	6.11924	5.45429	5.22473	4.5539
sp|Q14568|HS902_HUMAN	HSP90AA2	HS902_HUMAN Putative heat shock protein HSP 90-alpha A2	1	5.78251	6.43994	6.32453	6.9769	6.31531	6.36873	6.01941	5.86962	5.95679	7.04628	6.41774	6.20791	6.67508	6.03185	6.1909	5.37651
sp|Q9NQH7|XPP3_HUMAN	XPNPEP3	XPP3_HUMAN Probable Xaa-Pro aminopeptidase 3	15	4.86372	4.99359	4.8773	5.05718	5.30415	5.6754	5.38975	5.68977	6.01663	6.32217	5.90201	6.10892	7.76087	7.49022	8.61633	9.93197
sp|Q12931|TRAP1_HUMAN	TRAP1	TRAP1_HUMAN Heat shock protein 75 kDa, mitochondrial	100	7.42	7.60434	7.38243	7.29836	7.1671	6.93858	7.36757	7.21904	6.87399	6.55784	7.00968	6.54829	4.19717	4.23328	3.42964	2.75269
sp|Q58FF7|H90B3_HUMAN	HSP90AB3P	H90B3_HUMAN Putative heat shock protein HSP 90-beta-3	1	5.70571	6.19215	5.99768	5.66561	6.17785	5.21569	7.02057	7.3305	6.82844	7.48735	7.14909	6.21755	7.84632	5.0187	5.88059	4.26622
sp|P14625|ENPL_HUMAN	HSP90B1	ENPL_HUMAN Endoplasmin	205	6.4331	6.39823	6.35394	6.20951	6.98529	6.48322	6.68703	6.67224	7.10778	6.76701	6.79744	6.57826	6.01494	5.27476	5.06415	4.17311
sp|Q58FF6|H90B4_HUMAN	HSP90AB4P	H90B4_HUMAN Putative heat shock protein HSP 90-beta 4	3	6.41548	4.42631	6.5873	6.11914	6.02127	6.3039	7.34304	6.52579	8.23058	7.52461	6.37006	6.78238	6.2122	5.71554	5.13	4.29239
sp|Q58FG1|HS904_HUMAN	HSP90AA4P	HS904_HUMAN Putative heat shock protein HSP 90-alpha A4	3	7.56872	7.32023	6.86787	7.40954	6.67799	5.02572	5.48159	5.8906	7.64705	6.19491	4.93175	6.56952	6.82932	5.9253	5.18289	4.47702
sp|P08865|RSSA_HUMAN	RPSA	RSSA_HUMAN 40S ribosomal protein SA	63	6.23512	6.4598	6.0243	6.17881	5.95675	5.89048	5.99928	5.73172	5.73586	5.85695	6.05634	5.81683	6.48556	6.64067	7.41772	7.51383
sp|O14734|ACOT8_HUMAN	ACOT8	ACOT8_HUMAN Acyl-coenzyme A thioesterase 8	6	7.94167	7.85474	7.49372	7.24304	6.92086	6.2378	6.62412	6.80213	6.57269	5.57697	6.09948	5.7309	5.14761	5.36091	4.07478	4.31857
sp|Q09666|AHNK_HUMAN	AHNAK	AHNK_HUMAN Neuroblast differentiation-associated protein AHNAK	411	5.63545	6.19886	5.56123	5.43006	5.88617	6.04891	5.68094	5.89637	5.97248	6.05433	5.84149	6.14548	6.80853	6.89441	7.64563	8.29965
sp|Q8IVF2|AHNK2_HUMAN	AHNAK2	AHNK2_HUMAN Protein AHNAK2	40	5.51257	12.2156	5.17267	4.62297	5.33927	5.78396	5.1816	5.24462	5.89912	5.75496	5.36171	5.97808	6.98869	6.62405	6.82984	7.49029
sp|P48552|NRIP1_HUMAN	NRIP1	NRIP1_HUMAN Nuclear receptor-interacting protein 1	1	4.5762	4.69638	4.08136	4.59333	5.07662	5.31525	5.32937	5.07666	5.476	6.75048	5.7693	6.13581	9.15188	7.7314	9.9915	10.2485
sp|P62269|RS18_HUMAN	RPS18	RS18_HUMAN 40S ribosomal protein S18	27	6.43726	4.01611	6.0988	6.79298	6.1583	5.53641	6.1649	6.01301	5.47524	5.9283	6.33141	5.73307	5.65142	6.84706	8.38187	8.43388
sp|P05198|IF2A_HUMAN	EIF2S1	IF2A_HUMAN Eukaryotic translation initiation factor 2 subunit 1	54	5.93131	5.5627	5.9396	5.72334	6.06017	5.90391	5.89106	5.88401	6.07953	6.01253	5.9775	5.94171	7.06681	6.69671	7.93051	7.39858
sp|P61221|ABCE1_HUMAN	ABCE1	ABCE1_HUMAN ATP-binding cassette sub-family E member 1	90	5.16342	5.239	4.95856	5.0517	5.65078	6.0405	5.50656	5.82982	5.84012	6.54461	5.66384	6.13734	7.52989	7.65618	8.28866	8.899
tr|H0Y990|H0Y990_HUMAN	ABCE1	H0Y990_HUMAN ATP-binding cassette sub-family E member 1 (Fragment)	1	5.39328	2.42614	4.86954	4.94397	5.93774	5.83105	6.57261	6.16048	6.50955	7.7936	5.5443	7.13422	6.98571	7.73841	7.89879	8.26062
sp|Q92896-2|GSLG1_HUMAN	GLG1	GSLG1_HUMAN Isoform 2 of Golgi apparatus protein 1	71	5.0253	5.13322	4.94339	5.12547	5.64407	6.24688	5.55936	5.96449	5.74639	6.45925	5.92353	6.3118	7.17824	7.43528	8.12353	9.1798
sp|Q8TE73|DYH5_HUMAN	DNAH5	DYH5_HUMAN Dynein heavy chain 5, axonemal	2	5.18919	4.65741	5.1607	5.28618	5.38929	5.75865	5.44523	5.92275	6.09503	6.67706	5.8899	5.48013	7.56837	7.49404	9.19466	8.79142
sp|Q9UQ90|SPG7_HUMAN	SPG7	SPG7_HUMAN Paraplegin	12	7.4613	7.4902	7.82296	7.6544	6.66395	5.95019	6.95136	6.11871	6.62537	6.18226	6.20164	6.49854	4.8954	5.05039	4.45518	3.97816
sp|Q14469|HES1_HUMAN	HES1	HES1_HUMAN Transcription factor HES-1	3	4.20815	5.50118	4.53436	4.66941	5.44949	6.38315	6.59671	5.77226	6.07737	6.72539	6.40668	6.06251	9.59345	7.67772	7.23428	7.1079
sp|Q9H074|PAIP1_HUMAN	PAIP1	PAIP1_HUMAN Polyadenylate-binding protein-interacting protein 1	25	5.04165	5.11927	4.87914	5.24617	5.29836	5.92201	5.16545	5.64024	5.75931	6.42821	5.55934	6.18666	7.55277	7.95549	8.48952	9.75642
sp|P24347|MMP11_HUMAN	MMP11	MMP11_HUMAN Stromelysin-3	2	6.24546	7.00593	6.20485	7.49793	6.09455	5.43718	6.28284	5.97971	6.92852	6.55707	5.74177	6.41277	6.23755	5.78875	6.01786	5.56725
sp|Q9Y487|VPP2_HUMAN	ATP6V0A2	VPP2_HUMAN V-type proton ATPase 116 kDa subunit a isoform 2	7	6.39961	6.21771	6.83689	6.72185	7.19889	6.64679	7.19698	6.46713	6.89156	6.62162	6.96636	6.5448	5.22614	4.98708	4.68136	4.39522
sp|Q93050|VPP1_HUMAN	ATP6V0A1	VPP1_HUMAN V-type proton ATPase 116 kDa subunit a isoform 1	24	6.8704	7.11799	6.9777	6.76721	7.00349	6.6864	7.09442	6.75175	6.88359	6.44832	6.92798	6.07602	5.24578	4.9875	4.56461	3.59684
sp|P06576|ATPB_HUMAN	ATP5B	ATPB_HUMAN ATP synthase subunit beta, mitochondrial	136	5.48569	5.74591	5.50458	5.37145	6.21347	6.20852	6.03627	6.10797	6.49602	6.47973	6.21399	6.47446	7.01034	6.57889	6.91865	7.15407
tr|H0YI37|H0YI37_HUMAN	ATP5B	H0YI37_HUMAN ATP synthase subunit beta, mitochondrial (Fragment)	2	6.11912	7.51572	5.17103	5.51917	5.33331	4.45559	4.16241	4.36969	6.24024	5.24488	4.43527	5.93969	8.32313	7.58469	9.78375	9.80233
sp|P51688|SPHM_HUMAN	SGSH	SPHM_HUMAN N-sulphoglucosamine sulphohydrolase	1	6.9626	6.34451	6.6776	5.99191	7.13249	6.46434	6.22256	6.28386	7.38982	5.50154	6.39564	6.56183	5.94865	5.84283	5.12972	5.15009
sp|P68036-3|UB2L3_HUMAN	UBE2L3	UB2L3_HUMAN Isoform 3 of Ubiquitin-conjugating enzyme E2 L3	17	4.62533	5.0842	4.50152	5.03796	5.18313	5.57524	4.75486	5.45847	5.29732	6.46945	5.17671	5.81976	8.02432	8.89837	9.48305	10.6103
sp|Q8N1G4|LRC47_HUMAN	LRRC47	LRC47_HUMAN Leucine-rich repeat-containing protein 47	33	6.05733	5.67081	5.91731	5.80967	6.68	6.38219	6.75808	6.2745	6.52853	6.22076	7.03599	6.26767	6.78401	5.76316	6.55447	5.29552
sp|Q9UKK3|PARP4_HUMAN	PARP4	PARP4_HUMAN Poly [ADP-ribose] polymerase 4	42	6.6201	6.57296	6.52805	6.56668	6.65548	6.35197	6.60922	6.3986	6.8234	6.50112	6.43107	6.31115	5.95891	5.67918	5.26813	4.724
sp|Q9H4H8|FA83D_HUMAN	FAM83D	FA83D_HUMAN Protein FAM83D	9	8.80953	8.62806	9.14481	9.14286	6.77493	6.48486	7.29383	6.36582	5.74748	5.26991	5.82376	5.34737	3.70025	4.65383	3.40691	3.4058
sp|Q15031|SYLM_HUMAN	LARS2	SYLM_HUMAN Probable leucine--tRNA ligase, mitochondrial	32	8.59053	7.38377	8.68978	8.5704	6.89096	6.74078	7.56292	7.09177	6.13575	5.79536	6.58235	5.82359	3.63897	4.64978	3.19286	2.66042
sp|Q14997|PSME4_HUMAN	PSME4	PSME4_HUMAN Proteasome activator complex subunit 4	51	5.26589	5.15377	5.14248	5.08678	5.82095	6.21411	5.7868	5.93976	6.18393	6.61523	6.13546	6.40292	7.44723	7.06353	7.81174	7.92941
sp|Q86XI2-2|CNDG2_HUMAN	NCAPG2	CNDG2_HUMAN Isoform 2 of Condensin-2 complex subunit G2	10	9.01491	9.4117	9.30325	9.33285	6.22738	6.50117	6.88902	6.37377	5.6508	5.53233	5.51936	5.40558	3.56339	4.68679	3.21624	3.37146
sp|P10301|RRAS_HUMAN	RRAS	RRAS_HUMAN Ras-related protein R-Ras	9	4.92632	5.49928	5.26887	4.97969	6.00168	5.93754	5.77258	5.7725	6.16037	6.28504	5.98487	6.49307	7.64797	7.33482	8.02273	7.91266
sp|P62070|RRAS2_HUMAN	RRAS2	RRAS2_HUMAN Ras-related protein R-Ras2	7	5.66817	5.75071	5.5762	5.18729	6.33507	6.26377	6.37488	6.35533	6.54446	6.44306	6.4891	6.13752	7.14639	6.70776	6.89683	6.12348
sp|Q14106|TOB2_HUMAN	TOB2	TOB2_HUMAN Protein Tob2	1	7.97899	8.44701	8.02662	6.68406	6.53247	6.07372	7.38207	5.92724	5.6214	5.88865	5.99071	5.83579	5.72739	5.16108	4.50162	4.22118
sp|O75691|UTP20_HUMAN	UTP20	UTP20_HUMAN Small subunit processome component 20 homolog	3	7.51923	8.02016	8.54508	8.32277	5.78153	5.90599	6.81127	6.56332	6.22998	6.00718	5.28667	6.08786	5.19438	5.20981	4.37929	4.13548
sp|Q99523|SORT_HUMAN	SORT1	SORT_HUMAN Sortilin	13	5.2147	4.97285	5.10411	5.58139	5.5433	5.70331	5.34782	5.54426	5.71259	6.50301	6.02247	6.34696	7.47546	7.73027	8.07867	9.11883
sp|Q14669-3|TRIPC_HUMAN	TRIP12	TRIPC_HUMAN Isoform 3 of E3 ubiquitin-protein ligase TRIP12	28	8.14267	11.6016	8.41758	9.2734	6.17226	6.08457	6.47384	6.0846	5.66507	5.05792	5.74355	5.29503	4.17554	5.01666	3.49326	3.30251
sp|Q9H2W6|RM46_HUMAN	MRPL46	RM46_HUMAN 39S ribosomal protein L46, mitochondrial	22	5.23337	4.59646	5.20811	5.38328	5.81838	5.7745	5.68506	5.86009	5.99422	6.48835	6.17299	6.12275	7.56143	7.51444	8.27343	8.31313
sp|O95707|RPP29_HUMAN	POP4	RPP29_HUMAN Ribonuclease P protein subunit p29	7	5.83908	6.07021	5.5753	6.08351	5.8231	6.25903	5.94311	5.77847	5.5315	5.8868	5.55764	5.86774	6.43837	6.6947	7.7772	8.87425
sp|P99999|CYC_HUMAN	CYCS	CYC_HUMAN Cytochrome c	28	4.82466	5.26701	4.4277	4.67821	5.53379	5.90921	5.0933	5.73885	5.36129	6.19678	5.77145	6.01872	7.63373	8.20736	9.04614	10.2918
tr|F8VWT9|F8VWT9_HUMAN	HECTD4	F8VWT9_HUMAN Probable E3 ubiquitin-protein ligase HECTD4	7	8.40558	9.21234	8.37288	7.66747	6.73553	6.25816	6.66044	6.07689	6.28022	5.76621	6.24976	5.96231	4.24515	5.05257	3.69515	3.35933
sp|Q9GZT8|GTPC1_HUMAN	NIF3L1	GTPC1_HUMAN Putative GTP cyclohydrolase 1 type 2 NIF3L1	27	5.22836	5.32218	4.86569	5.21519	5.53975	5.78487	5.11749	5.47057	5.59385	6.22994	5.49942	6.15932	7.51463	7.92233	8.62332	9.91309
sp|Q92888-3|ARHG1_HUMAN	ARHGEF1	ARHG1_HUMAN Isoform 3 of Rho guanine nucleotide exchange factor 1	35	8.03928	8.21123	8.1841	7.91415	6.88288	6.59939	7.09269	6.79264	6.17283	5.89306	6.51523	6.01453	4.18586	4.72187	3.45055	3.32971
sp|Q8N3C0|ASCC3_HUMAN	ASCC3	ASCC3_HUMAN Activating signal cointegrator 1 complex subunit 3	47	9.49838	9.63378	9.86226	9.80224	6.33626	6.12018	7.01326	6.48089	5.35044	5.06485	5.7012	5.22866	3.17807	4.85475	3.02646	2.84833
sp|O95822|DCMC_HUMAN	MLYCD	DCMC_HUMAN Malonyl-CoA decarboxylase, mitochondrial	11	5.12878	5.18553	5.18307	5.1057	6.15643	6.32808	6.11976	6.17236	6.55398	6.94677	7.04767	7.01311	7.27596	6.39197	7.16738	6.22346
sp|P08195-3|4F2_HUMAN	SLC3A2	4F2_HUMAN Isoform 3 of 4F2 cell-surface antigen heavy chain	64	5.69825	5.92314	5.60697	5.6362	6.40112	6.61399	6.34478	6.46777	6.24554	6.4578	6.49295	6.44363	6.58227	6.31302	6.41488	6.35767
tr|F5H867|F5H867_HUMAN	SLC3A2	F5H867_HUMAN 4F2 cell-surface antigen heavy chain (Fragment)	2	6.20608	9.8866	5.51017	4.42115	5.66046	5.24738	5.85137	5.21282	6.52871	6.29094	5.61193	6.152	7.03356	7.02271	7.5026	5.86153
sp|Q9H089|LSG1_HUMAN	LSG1	LSG1_HUMAN Large subunit GTPase 1 homolog	21	8.95033	8.84091	8.90773	8.75912	6.53772	6.08717	6.92678	6.30974	6.10037	5.46258	6.07259	5.3685	3.87633	4.92322	3.71782	3.15907
sp|A1XBS5|F92A1_HUMAN	FAM92A1	F92A1_HUMAN Protein FAM92A1	7	6.72577	6.97562	7.30165	7.2075	6.43902	6.64137	6.75778	6.45562	6.65003	6.73461	6.48187	6.41764	5.6927	5.45764	4.54738	3.5138
sp|Q7L273|KCTD9_HUMAN	KCTD9	KCTD9_HUMAN BTB/POZ domain-containing protein KCTD9	16	5.42134	5.73369	5.5747	5.41327	6.32087	6.02183	5.96932	5.91151	6.41995	6.42944	6.2991	6.40907	7.15761	6.63132	7.4408	6.84619
sp|Q9H3Q1|BORG4_HUMAN	CDC42EP4	BORG4_HUMAN Cdc42 effector protein 4	5	6.20679	6.54992	5.89231	5.79997	6.19351	6.17347	6.14406	6.29661	6.09557	6.09067	6.01722	6.44344	6.62111	5.97064	6.93319	6.57153
sp|Q13045|FLII_HUMAN	FLII	FLII_HUMAN Protein flightless-1 homolog	52	7.28844	7.41051	7.28263	7.35893	6.57376	6.52852	6.90833	6.56209	6.60577	6.29957	6.62806	6.20766	4.7082	5.3289	4.36775	3.9409
sp|Q13045-2|FLII_HUMAN	FLII	FLII_HUMAN Isoform 2 of Protein flightless-1 homolog	1	7.0662	5.41518	8.21699	5.9592	7.56103	6.44495	6.05626	6.23052	6.93124	5.90584	7.53299	5.34542	6.43625	4.48076	6.12839	4.28878
tr|E7EVA0|E7EVA0_HUMAN	MAP4	E7EVA0_HUMAN Microtubule-associated protein	74	5.02741	5.1328	5.02924	5.16593	5.72047	6.28382	5.843	6.08878	5.71401	6.28577	6.15452	6.3145	7.17945	7.25418	8.09815	8.70796
sp|P27816-5|MAP4_HUMAN	MAP4	MAP4_HUMAN Isoform 5 of Microtubule-associated protein 4	72	5.07743	5.13759	4.93945	5.16712	5.42671	6.04275	5.44185	5.83594	5.5627	6.27323	5.77557	6.16258	7.58147	7.70919	8.46778	9.39864
sp|Q9C0E2|XPO4_HUMAN	XPO4	XPO4_HUMAN Exportin-4	21	7.61921	7.80468	7.95019	7.65411	6.90989	6.52431	7.08042	6.61606	6.5185	6.079	6.46022	6.10573	4.51141	4.8214	3.98222	3.36265
sp|P52306-4|GDS1_HUMAN	RAP1GDS1	GDS1_HUMAN Isoform 4 of Rap1 GTPase-GDP dissociation stimulator 1	27	6.75063	6.58698	6.94959	6.66036	6.87442	6.95261	7.30634	7.04706	6.97233	6.64481	7.05199	6.48221	4.98953	5.01103	4.1518	3.5683
sp|Q14232|EI2BA_HUMAN	EIF2B1	EI2BA_HUMAN Translation initiation factor eIF-2B subunit alpha	24	5.06798	3.99111	4.96141	4.91884	5.9406	6.41655	5.93115	6.1825	5.90868	6.50932	5.94738	6.16089	7.59384	7.59759	8.36049	8.51167
sp|Q9NSE4|SYIM_HUMAN	IARS2	SYIM_HUMAN Isoleucine--tRNA ligase, mitochondrial	45	7.05541	6.80536	7.15212	6.96467	7.07279	6.4944	7.31268	6.87499	7.02459	6.34599	6.86877	6.22327	5.49239	4.75184	4.27069	3.29006
sp|Q06481|APLP2_HUMAN	APLP2	APLP2_HUMAN Amyloid-like protein 2	12	5.15526	4.94003	5.22191	5.3968	5.54988	5.75607	5.47951	5.766	5.70862	6.23436	5.5768	6.42262	7.1211	7.85361	8.49725	9.32017
sp|P05067|A4_HUMAN	APP	A4_HUMAN Amyloid beta A4 protein	23	5.29312	5.54215	5.18771	5.33336	5.7179	6.00635	5.67786	6.07308	5.89734	6.47787	5.75294	6.32094	7.33815	7.17613	7.73723	8.46787
sp|P26639|SYTC_HUMAN	TARS	SYTC_HUMAN Threonine--tRNA ligase, cytoplasmic	101	5.25033	4.96642	5.32289	5.22462	6.10186	6.10972	5.95683	6.02453	6.39839	6.60045	6.37716	6.36716	7.82306	7.01585	7.59543	6.86528
sp|A2RTX5|SYTC2_HUMAN	TARSL2	SYTC2_HUMAN Probable threonine--tRNA ligase 2, cytoplasmic	13	5.92235	5.46292	5.93479	6.15887	5.97775	6.00452	6.0781	6.09999	6.21492	6.8835	6.80496	6.11676	7.19157	6.88195	6.62995	5.63709
sp|Q76I76|SSH2_HUMAN	SSH2	SSH2_HUMAN Protein phosphatase Slingshot homolog 2	4	6.82906	5.207	6.94763	6.43395	7.08691	6.3708	6.15657	6.2206	6.98283	6.43133	6.41769	5.98413	5.81964	5.73208	5.79291	5.58689
sp|Q9NZN4|EHD2_HUMAN	EHD2	EHD2_HUMAN EH domain-containing protein 2	17	8.27273	8.71746	7.9694	7.79926	6.72857	6.11705	6.77818	6.44817	6.24348	5.72587	6.02421	5.58218	4.47638	5.07305	4.32552	3.7185
sp|Q9H4M9|EHD1_HUMAN	EHD1	EHD1_HUMAN EH domain-containing protein 1	29	8.26634	8.45112	8.517	8.25991	6.84141	6.45209	6.89647	6.64175	6.29949	5.73056	6.32165	5.85012	4.04466	4.87721	3.41909	3.13114
sp|Q9H223|EHD4_HUMAN	EHD4	EHD4_HUMAN EH domain-containing protein 4	35	8.989	8.36202	9.04759	8.90222	6.99303	6.52002	7.31907	6.77486	6.29424	5.67406	6.28796	5.84688	3.45185	4.34481	2.92837	2.26403
sp|Q9NYU2|UGGG1_HUMAN	UGGT1	UGGG1_HUMAN UDP-glucose:glycoprotein glucosyltransferase 1	86	5.90261	5.47799	6.07079	5.8584	6.76247	6.59134	6.75763	6.53324	6.92212	6.67304	6.85063	6.44458	6.83598	5.73397	5.86826	4.71694
sp|Q9NYU1|UGGG2_HUMAN	UGGT2	UGGG2_HUMAN UDP-glucose:glycoprotein glucosyltransferase 2	14	6.65743	6.14183	6.62959	6.58648	6.38032	6.93761	6.78282	7.01064	5.95368	6.65457	6.34661	6.02998	5.32619	6.24027	5.0871	5.2349
sp|Q9BX70|BTBD2_HUMAN	BTBD2	BTBD2_HUMAN BTB/POZ domain-containing protein 2	2	6.42787	4.3419	7.43897	7.48728	7.01197	8.59842	8.79056	6.89742	5.79801	6.47947	6.94545	6.51155	4.51658	5.63863	3.59476	3.52116
sp|Q9H0C5|BTBD1_HUMAN	BTBD1	BTBD1_HUMAN BTB/POZ domain-containing protein 1	2	6.78547	4.10987	7.66175	8.22912	6.80401	7.30055	7.38763	6.95922	5.41144	6.68966	7.2211	6.2034	4.73301	5.16456	4.88287	4.45634
sp|P36871|PGM1_HUMAN	PGM1	PGM1_HUMAN Phosphoglucomutase-1	46	4.96248	5.51908	4.6872	4.87454	5.41491	5.86537	5.16461	5.68955	5.68924	6.37468	5.4661	6.2832	7.54914	8.01838	8.61896	9.82255
sp|Q8N3Z3|GTPB8_HUMAN	GTPBP8	GTPB8_HUMAN GTP-binding protein 8	2	5.36988	4.91846	5.6785	5.89319	5.90741	5.83875	5.88268	5.9464	5.96584	6.18438	5.75524	6.46908	7.94338	6.84575	7.08404	8.31701
sp|P17301|ITA2_HUMAN	ITGA2	ITA2_HUMAN Integrin alpha-2	48	5.33424	5.44519	5.25223	5.32679	5.6443	5.94134	5.38371	5.73294	5.73682	6.28476	5.79373	6.30043	7.17171	7.45499	8.07309	9.12373
tr|E7ESP4|E7ESP4_HUMAN	ITGA2	E7ESP4_HUMAN Integrin alpha-2	3	5.71809	7.99041	6.68032	4.38041	5.39473	7.01472	5.2594	7.94726	5.40215	5.88394	5.9311	7.18162	5.93839	6.92022	6.39674	5.96048
sp|Q9P2D1|CHD7_HUMAN	CHD7	CHD7_HUMAN Chromodomain-helicase-DNA-binding protein 7	8	7.82621	10.9882	8.18854	7.70524	6.05891	5.32783	5.91076	5.63897	5.74549	5.16988	5.68438	5.44067	5.07212	5.92181	4.67964	4.64138
sp|Q3L8U1|CHD9_HUMAN	CHD9	CHD9_HUMAN Chromodomain-helicase-DNA-binding protein 9	1	6.69154	7.03657	7.51296	6.57112	5.80216	6.07921	6.05608	5.97151	5.75267	6.22637	5.99077	5.42879	5.70082	6.0972	6.65221	6.43002
sp|Q9HCK8|CHD8_HUMAN	CHD8	CHD8_HUMAN Chromodomain-helicase-DNA-binding protein 8	16	8.42716	8.5393	8.59982	8.28004	6.28561	6.20682	7.00931	6.42405	6.24455	5.80067	6.31192	5.97076	4.01109	4.86551	3.79741	3.22598
sp|Q8TD26|CHD6_HUMAN	CHD6	CHD6_HUMAN Chromodomain-helicase-DNA-binding protein 6	3	9.62281	10.7937	10.0521	9.63359	6.21204	5.92581	6.8731	6.17983	5.78103	5.03875	5.5294	5.32562	3.26386	4.76506	2.58814	2.41512
sp|Q5VZE5|NAA35_HUMAN	NAA35	NAA35_HUMAN N-alpha-acetyltransferase 35, NatC auxiliary subunit	21	8.40469	8.16742	8.62857	8.54769	6.98294	6.58842	7.17053	7.00642	6.32588	5.82387	6.45501	5.73679	3.79084	4.42482	3.15284	2.79329
sp|Q9NXG6-3|P4HTM_HUMAN	P4HTM	P4HTM_HUMAN Isoform 3 of Transmembrane prolyl 4-hydroxylase	11	5.99818	6.34433	6.40208	6.06651	6.44986	6.09131	6.43011	6.087	6.35652	6.34141	6.66422	6.59295	5.99888	6.01264	6.36436	5.79963
sp|Q9NX24|NHP2_HUMAN	NHP2	NHP2_HUMAN H/ACA ribonucleoprotein complex subunit 2	9	6.60329	6.7496	6.87401	7.18885	5.46115	5.92705	6.11437	5.95134	5.50579	5.85842	5.99989	6.31604	6.27685	6.83348	6.25118	6.08868
sp|Q9UBT2|SAE2_HUMAN	UBA2	SAE2_HUMAN SUMO-activating enzyme subunit 2	38	6.87713	6.15276	6.78932	6.9238	7.14472	6.65589	7.0343	6.95786	6.92987	6.45586	6.93134	6.64012	5.29403	4.91193	4.56981	3.73127
sp|Q5T7W0|ZN618_HUMAN	ZNF618	ZN618_HUMAN Zinc finger protein 618	5	6.08834	6.72147	6.87758	6.66643	6.23546	6.33285	6.06027	5.7655	6.76914	6.37796	6.08261	7.0131	6.0506	5.14583	5.79136	6.02151
sp|Q9BZM5|N2DL2_HUMAN	ULBP2	N2DL2_HUMAN NKG2D ligand 2	2	5.8873	5.06923	6.0343	5.27011	5.75191	6.25517	5.91188	6.50392	6.25288	6.39364	5.98876	6.55285	7.58351	7.02527	6.99729	6.52198
sp|Q96KP1|EXOC2_HUMAN	EXOC2	EXOC2_HUMAN Exocyst complex component 2	20	9.56977	9.12706	9.79114	9.35401	6.76788	6.28468	7.41716	6.71612	5.70952	5.25341	5.91244	5.20437	2.89075	4.72592	2.81383	2.46195
sp|O75351|VPS4B_HUMAN	VPS4B	VPS4B_HUMAN Vacuolar protein sorting-associated protein 4B	27	6.87984	7.24104	6.69186	6.32446	7.03433	6.36003	6.59365	6.39501	7.12747	6.20001	6.47904	6.47667	5.88919	5.31025	4.78386	4.21328
sp|Q9UN37|VPS4A_HUMAN	VPS4A	VPS4A_HUMAN Vacuolar protein sorting-associated protein 4A	15	7.52381	8.04455	7.35669	7.51014	6.89685	6.48219	6.77671	6.45172	6.87882	6.15858	6.3834	6.26375	4.69408	4.94624	4.07555	3.55693
sp|Q6PIW4|FIGL1_HUMAN	FIGNL1	FIGL1_HUMAN Fidgetin-like protein 1	8	6.64513	6.74506	7.0478	6.59777	6.84344	6.56636	7.00583	6.41674	6.61169	6.65743	6.84169	6.49353	5.45882	5.25453	4.8292	3.98496
sp|Q9UBP0|SPAST_HUMAN	SPAST	SPAST_HUMAN Spastin	10	6.678	6.92725	6.7538	6.20746	7.00009	6.51175	6.78778	6.53857	6.88261	6.64927	7.07367	6.66802	5.87329	5.09398	4.43778	3.91668
sp|Q9HAV7|GRPE1_HUMAN	GRPEL1	GRPE1_HUMAN GrpE protein homolog 1, mitochondrial	26	5.46596	5.53177	5.37458	5.23056	6.45097	6.36349	6.10251	6.19375	6.65052	6.55228	6.22418	6.28404	7.58881	6.65578	6.92158	6.40921
sp|Q92696|PGTA_HUMAN	RABGGTA	PGTA_HUMAN Geranylgeranyl transferase type-2 subunit alpha	26	6.31144	6.10362	6.37893	6.16205	6.67269	6.65573	6.74338	6.61917	6.91848	6.51379	6.72075	6.46796	6.11276	5.62551	5.34941	4.64432
sp|Q15418-2|KS6A1_HUMAN	RPS6KA1	KS6A1_HUMAN Isoform 2 of Ribosomal protein S6 kinase alpha-1	34	7.95811	8.13153	8.12249	7.87281	7.03296	6.52504	7.05731	6.75459	6.62228	5.89079	6.62311	6.05558	4.19664	4.61668	3.52409	3.01598
sp|P51812|KS6A3_HUMAN	RPS6KA3	KS6A3_HUMAN Ribosomal protein S6 kinase alpha-3	23	8.0024	6.21673	8.25369	8.22008	6.99749	6.33496	7.21302	6.89345	6.75701	6.02715	6.69209	6.17445	4.45553	5.03494	3.75725	2.96977
sp|Q86UE8|TLK2_HUMAN	TLK2	TLK2_HUMAN Serine/threonine-protein kinase tousled-like 2	8	6.20204	6.14979	6.20821	6.33688	6.22499	5.78258	6.09331	5.84156	6.24635	6.34107	6.46423	6.50329	6.6428	5.84563	7.05596	6.06131
sp|Q9UKI8-2|TLK1_HUMAN	TLK1	TLK1_HUMAN Isoform 2 of Serine/threonine-protein kinase tousled-like 1	7	5.86796	5.83601	5.51958	5.69624	6.20239	6.36473	6.40418	6.36745	6.61347	6.4491	6.2474	6.52628	6.47154	5.88583	6.91019	6.63767
sp|Q96GX5|GWL_HUMAN	MASTL	GWL_HUMAN Serine/threonine-protein kinase greatwall	3	7.27498	6.41544	7.32409	6.7332	6.82153	6.43168	6.74875	6.36183	6.95963	5.91063	6.77867	7.25206	5.01353	5.02507	4.82209	4.12682
sp|Q6P0Q8|MAST2_HUMAN	MAST2	MAST2_HUMAN Microtubule-associated serine/threonine-protein kinase 2	2	6.00429	6.64911	6.65635	6.3892	5.91429	6.11222	6.29705	6.62858	5.58256	5.55807	5.51835	6.46168	6.10407	7.3263	5.77379	7.0241
sp|Q8IW41|MAPK5_HUMAN	MAPKAPK5	MAPK5_HUMAN MAP kinase-activated protein kinase 5	2	5.11123	4.71355	5.62026	5.0928	6.04509	6.18981	6.06647	5.93469	5.38237	5.83133	7.53874	5.50711	7.87596	7.40113	8.70025	6.9892
sp|O15021|MAST4_HUMAN	MAST4	MAST4_HUMAN Microtubule-associated serine/threonine-protein kinase 4	3	8.03943	8.66589	8.72732	7.6346	6.92338	6.6146	7.17776	6.80204	6.64867	5.71447	6.29891	5.91681	4.07773	4.74715	3.36692	2.64431
sp|Q567U6|CCD93_HUMAN	CCDC93	CCD93_HUMAN Coiled-coil domain-containing protein 93	18	6.59005	6.5283	6.45596	6.39651	6.79366	6.51391	6.9789	6.61787	7.14673	6.83608	7.01098	6.57926	5.81272	5.15318	4.71648	3.86939
sp|Q6Y7W6|PERQ2_HUMAN	GIGYF2	PERQ2_HUMAN PERQ amino acid-rich with GYF domain-containing protein 2	19	7.26816	7.18598	7.2938	7.15482	6.87961	6.33808	6.71045	6.18584	6.3011	5.52951	6.62946	5.801	5.36063	5.1852	5.53714	4.63922
sp|O14640|DVL1_HUMAN	DVL1	DVL1_HUMAN Segment polarity protein dishevelled homolog DVL-1	3	7.2697	7.32594	7.05749	6.77049	6.46487	5.65362	6.45003	6.02834	6.6044	6.32461	6.06315	5.79917	6.02164	5.55234	5.55718	5.05704
sp|O14641|DVL2_HUMAN	DVL2	DVL2_HUMAN Segment polarity protein dishevelled homolog DVL-2	14	7.41261	7.74402	7.35697	7.23382	6.51018	6.42888	6.87201	6.50837	6.48597	5.92447	6.24445	6.27462	5.10027	5.27576	4.36318	4.26442
sp|Q92997|DVL3_HUMAN	DVL3	DVL3_HUMAN Segment polarity protein dishevelled homolog DVL-3	6	6.99801	7.64979	7.17528	7.0693	6.44363	6.1727	6.3461	5.82205	6.67098	6.08852	5.92995	6.52694	5.44962	5.77759	5.08115	4.7984
sp|P82921|RT21_HUMAN	MRPS21	RT21_HUMAN 28S ribosomal protein S21, mitochondrial	5	5.2201	5.56551	5.45069	5.36466	5.74069	6.95643	6.89985	6.99642	5.89278	6.6939	7.2536	6.25865	6.11586	6.0807	6.579	6.93116
sp|P52434|RPAB3_HUMAN	POLR2H	RPAB3_HUMAN DNA-directed RNA polymerases I, II, and III subunit RPABC3	6	6.05675	6.52297	6.2206	5.68678	6.85666	6.42567	6.126	6.15912	6.74066	6.30802	6.41638	6.08432	7.05502	6.2275	6.05376	5.0598
sp|Q9NQ92|COPRS_HUMAN	COPRS	COPRS_HUMAN Coordinator of PRMT5 and differentiation stimulator	5	4.7093	6.58382	4.86026	5.48582	5.27009	6.30146	4.69798	5.94568	5.72462	6.50626	5.81761	6.04622	6.96938	7.92724	7.88928	9.26498
sp|P62263|RS14_HUMAN	RPS14	RS14_HUMAN 40S ribosomal protein S14	30	5.91365	2.85341	5.88165	6.45157	6.35311	6.31868	6.87269	6.80192	5.76213	6.29456	7.4352	6.0685	5.55008	6.59898	7.56771	7.27616
sp|Q9H1P3|OSBL2_HUMAN	OSBPL2	OSBL2_HUMAN Oxysterol-binding protein-related protein 2	9	6.63826	6.84785	7.09919	6.52874	6.98939	6.73069	7.14508	6.72909	7.18808	6.53909	7.64388	6.60571	5.2788	4.31594	4.08471	3.63551
tr|J3KNL6|J3KNL6_HUMAN	SEC16A	J3KNL6_HUMAN Protein transport protein Sec16A	31	6.3824	6.53347	6.40061	6.333	6.07613	6.27591	6.3301	6.27361	6.24084	6.27337	6.41228	6.28835	6.23469	6.26441	5.78009	5.90074
sp|Q86UU0|BCL9L_HUMAN	BCL9L	BCL9L_HUMAN B-cell CLL/lymphoma 9-like protein	26	5.0009	5.29605	4.96718	5.26769	5.41729	5.79589	5.13175	5.57568	5.62548	6.27244	5.82663	6.46251	7.71273	7.70091	8.24749	9.69937
sp|Q14692|BMS1_HUMAN	BMS1	BMS1_HUMAN Ribosome biogenesis protein BMS1 homolog	12	9.57228	9.71423	9.84923	10.1595	6.36942	6.23014	6.7353	6.30079	5.04579	5.01417	5.63217	4.80967	3.22943	5.481	3.11027	2.74657
sp|Q14151|SAFB2_HUMAN	SAFB2	SAFB2_HUMAN Scaffold attachment factor B2	10	5.68754	5.72694	5.64396	5.62152	5.83221	5.82614	5.85265	5.83875	6.00417	6.1294	6.13679	6.46025	6.7302	6.86705	7.80152	7.84091
sp|Q15424-3|SAFB1_HUMAN	SAFB	SAFB1_HUMAN Isoform 3 of Scaffold attachment factor B1	8	6.15206	6.65632	5.99515	6.30462	5.50274	5.34543	5.63271	5.78695	6.10482	5.3759	5.93385	6.11056	6.67518	6.86403	7.59425	7.96544
sp|P36956-4|SRBP1_HUMAN	SREBF1	SRBP1_HUMAN Isoform 4 of Sterol regulatory element-binding protein 1	2	5.99101	6.99429	5.60749	6.32521	6.32884	6.75397	6.5627	6.70309	5.86941	7.22729	6.41603	5.56952	6.84321	5.96132	5.20833	5.6383
sp|P35659|DEK_HUMAN	DEK	DEK_HUMAN Protein DEK	18	9.12045	9.01269	9.02405	9.02683	6.84995	6.43136	6.89006	6.6782	5.76468	5.29065	5.93394	5.41587	3.3521	4.72129	3.35334	3.13454
sp|O00221|IKBE_HUMAN	NFKBIE	IKBE_HUMAN NF-kappa-B inhibitor epsilon	4	5.65546	3.60807	5.52107	6.3618	5.68535	5.54375	6.48641	5.72041	6.18514	6.62533	6.70522	6.47109	5.94332	6.57946	8.47966	8.42846
sp|Q15004|PAF15_HUMAN	KIAA0101	PAF15_HUMAN PCNA-associated factor	4	5.03635	5.71023	5.11712	5.24369	5.16356	5.51091	4.98234	5.61734	5.52071	6.21377	5.70328	6.42592	7.53901	7.67746	8.64519	9.8931
sp|Q92900|RENT1_HUMAN	UPF1	RENT1_HUMAN Regulator of nonsense transcripts 1	71	6.1061	6.08629	6.15125	6.11027	6.19649	6.09652	6.07382	6.00723	6.03607	6.08606	6.24841	6.15554	6.71855	6.52122	6.8998	6.50639
sp|Q9UKM7|MA1B1_HUMAN	MAN1B1	MA1B1_HUMAN Endoplasmic reticulum mannosyl-oligosaccharide 1,2-alpha-mannosidase	8	7.59983	10.4399	7.76652	7.62209	6.49551	5.8286	6.48472	6.8861	6.36811	5.70511	6.20974	5.86996	4.52055	5.53	3.53543	3.13786
sp|Q9UNY4|TTF2_HUMAN	TTF2	TTF2_HUMAN Transcription termination factor 2	12	8.3991	8.40507	8.32017	8.48147	6.82211	6.5028	6.97781	6.66801	5.83012	5.81029	6.40659	6.01458	4.03511	4.52392	3.583	3.21983
sp|P08582|TRFM_HUMAN	MFI2	TRFM_HUMAN Melanotransferrin	8	5.37033	5.5227	5.39792	5.63626	5.6951	5.84671	5.43994	5.93878	6.07112	6.27474	5.50843	5.97507	7.27811	7.51543	8.06915	8.46019
sp|Q8IV48|ERI1_HUMAN	ERI1	ERI1_HUMAN 3'-5' exoribonuclease 1	15	7.6643	7.35007	8.2272	7.88879	6.89599	6.56803	7.22571	6.67369	6.35586	5.93505	6.93024	6.08971	4.36895	4.84031	3.78362	3.20248
sp|Q9NRC8|SIR7_HUMAN	SIRT7	SIR7_HUMAN NAD-dependent protein deacetylase sirtuin-7	2	6.49252	6.72535	7.51797	6.67737	6.95894	6.1265	6.77627	5.92156	5.37963	5.81701	6.62868	5.99266	5.29673	6.05121	5.56515	6.07244
sp|Q9UJC3|HOOK1_HUMAN	HOOK1	HOOK1_HUMAN Protein Hook homolog 1	33	6.12803	6.30106	6.37609	6.22952	6.42994	6.11146	6.35736	6.18657	6.68696	6.50131	6.35386	6.36033	6.43612	6.09271	5.94641	5.50227
sp|Q86VS8|HOOK3_HUMAN	HOOK3	HOOK3_HUMAN Protein Hook homolog 3	11	5.88729	6.11048	5.73484	5.98577	6.03052	6.10349	5.74022	6.03083	6.08793	6.39328	6.14123	6.37833	6.41895	6.72015	7.19518	7.04152
sp|O15116|LSM1_HUMAN	LSM1	LSM1_HUMAN U6 snRNA-associated Sm-like protein LSm1	5	4.9782	6.04506	4.84944	5.1866	5.50589	6.11679	5.46058	5.72226	5.73812	6.02043	5.64145	6.14414	7.48152	8.13747	7.12928	9.84277
tr|Q9H552|Q9H552_HUMAN		Q9H552_HUMAN Uncharacterized protein	2	4.24136	4.98444	5.36056	7.59136	7.23125	10.8724	8.01335	11.2833	4.9958	4.94327	4.89127	7.16966	5.01395	4.50329	5.3242	3.58055
sp|P08670|VIME_HUMAN	VIM	VIME_HUMAN Vimentin	4	5.01991	5.96695	5.07951	5.3992	5.69648	5.74037	5.64602	6.2549	5.64137	6.14971	5.54448	7.89774	6.44369	7.04887	8.00174	8.46909
sp|Q9UHD8|SEPT9_HUMAN	2021-09-09	SEPT9_HUMAN Septin-9	65	6.78039	6.83815	6.63743	6.74261	6.22877	5.77438	5.91252	5.87187	5.91735	5.53634	5.72709	5.75006	5.98678	5.95125	7.37042	6.9746
sp|Q9NVA2-2|SEP11_HUMAN	2021-09-11	SEP11_HUMAN Isoform 2 of Septin-11	21	5.99162	6.41813	5.68187	6.19955	5.5599	5.72372	5.52171	6.87868	5.34586	5.28951	5.33416	5.38816	6.16181	7.73543	8.18234	8.58753
sp|Q16181|SEPT7_HUMAN	2021-09-07	SEPT7_HUMAN Septin-7	33	5.58764	6.13842	5.77769	5.65807	5.77929	6.72659	6.39237	6.26264	5.46281	6.08882	6.76409	6.13473	5.84672	6.06696	7.59674	7.71644
sp|Q9UH03|SEPT3_HUMAN	2021-09-03	SEPT3_HUMAN Neuronal-specific septin-3	8	5.50116	6.29645	5.56032	5.49529	5.94875	6.07573	5.4652	5.80557	5.89411	6.24042	5.97018	6.03319	6.58178	6.67715	7.99738	8.45731
sp|Q9P0V9-2|SEP10_HUMAN	2021-09-10	SEP10_HUMAN Isoform 2 of Septin-10	21	6.80896	6.23749	6.55763	6.59101	6.46295	6.06437	5.95778	5.85373	5.91707	5.61635	5.80541	5.55512	5.90009	5.92299	7.40096	7.34809
sp|Q92599|SEPT8_HUMAN	2021-09-08	SEPT8_HUMAN Septin-8	21	6.12316	6.54833	5.86761	5.85801	5.88811	6.20576	5.99037	5.96167	5.6626	5.80757	6.00099	5.99556	5.89793	6.0099	7.93137	8.25107
sp|Q14141|SEPT6_HUMAN	2021-09-06	SEPT6_HUMAN Septin-6	4	6.17255	6.94673	5.99435	6.36481	5.62259	5.65764	5.03571	6.04007	5.64939	5.65204	5.73357	6.58717	5.85507	6.18801	7.59753	8.90278
sp|Q15019-2|SEPT2_HUMAN	2021-09-02	SEPT2_HUMAN Isoform 2 of Septin-2	36	6.43674	6.8912	6.11226	6.04358	5.96861	5.94575	5.69608	5.70036	5.59601	5.5347	5.576	5.64376	6.01346	6.47176	7.97451	8.39522
sp|O43493|TGON2_HUMAN	TGOLN2	TGON2_HUMAN Trans-Golgi network integral membrane protein 2	9	4.95126	5.28919	4.8352	4.85606	5.57376	6.01624	5.40742	5.91224	5.8066	6.24415	5.79228	6.46398	7.34819	7.7846	8.44785	9.27099
sp|P84090|ERH_HUMAN	ERH	ERH_HUMAN Enhancer of rudimentary homolog	5	4.99866	5.20319	4.72245	5.01759	5.93517	6.15105	5.1659	6.00262	5.56817	6.15593	6.15048	6.56733	8.20313	7.76207	6.18998	10.2063
sp|Q13796|SHRM2_HUMAN	SHROOM2	SHRM2_HUMAN Protein Shroom2	10	5.55293	5.95859	5.48974	5.58011	5.75322	5.64161	5.64668	5.58629	6.01575	6.12492	6.2137	6.15867	7.17087	6.99106	8.16037	7.95549
sp|Q8TF72|SHRM3_HUMAN	SHROOM3	SHRM3_HUMAN Protein Shroom3	6	5.4713	5.50974	6.32976	5.34929	6.37996	5.63032	6.11587	5.97064	6.23503	6.38646	6.2963	6.79753	6.74564	6.88512	6.61097	7.28606
sp|Q7Z417|NUFP2_HUMAN	NUFIP2	NUFP2_HUMAN Nuclear fragile X mental retardation-interacting protein 2	18	6.59369	6.63271	6.47517	6.38874	6.43436	6.2258	6.16501	6.3092	5.75302	5.75399	6.10022	5.83387	6.16636	6.70985	6.13817	6.31985
sp|O75165|DJC13_HUMAN	DNAJC13	DJC13_HUMAN DnaJ homolog subfamily C member 13	34	9.34697	8.95623	9.41147	9.49577	6.78551	6.44007	7.10997	6.76334	5.66458	5.40906	5.8689	5.53886	3.08681	4.66295	2.88726	2.57224
sp|O00214-2|LEG8_HUMAN	LGALS8	LEG8_HUMAN Isoform 2 of Galectin-8	11	5.50526	4.29904	5.6565	5.63045	6.28226	6.15479	6.10328	6.11074	6.59211	6.79726	6.55359	6.71476	7.24855	6.73526	6.91711	6.69905
sp|Q96E29|MTER1_HUMAN	MTERFD1	MTER1_HUMAN mTERF domain-containing protein 1, mitochondrial	17	7.4845	8.92737	7.61745	7.38338	6.52285	6.22809	6.6498	6.74435	6.4401	5.91178	6.62925	6.20169	4.77988	4.88146	4.08372	3.51433
sp|Q9P2R3-4|ANFY1_HUMAN	ANKFY1	ANFY1_HUMAN Isoform 4 of Ankyrin repeat and FYVE domain-containing protein 1	15	7.37277	7.30951	7.46355	7.39317	6.76052	6.67752	7.09016	6.59347	6.52784	5.98423	6.30401	6.085	4.60783	5.05875	4.58599	4.18569
sp|Q9Y2L5|TPPC8_HUMAN	TRAPPC8	TPPC8_HUMAN Trafficking protein particle complex subunit 8	13	7.26192	7.57715	7.59819	7.50763	6.3541	6.51007	6.88604	6.56829	6.73767	6.38339	6.51772	6.00419	4.70542	5.09412	4.32768	3.96641
sp|P46013|KI67_HUMAN	MKI67	KI67_HUMAN Antigen KI-67	62	8.19097	8.98419	8.04652	8.10666	5.72553	5.47352	5.63601	5.58593	5.46263	5.25977	5.29479	5.43778	5.02275	7.17502	5.28367	5.31423
sp|Q15276|RABE1_HUMAN	RABEP1	RABE1_HUMAN Rab GTPase-binding effector protein 1	42	4.86181	4.98504	4.9245	5.01854	5.49572	5.9128	5.37737	5.70797	5.89938	6.45363	5.91428	6.39366	7.40499	7.74197	8.54916	9.35918
sp|Q5THK1|PR14L_HUMAN	PRR14L	PR14L_HUMAN Protein PRR14L	7	6.72456	6.10714	7.10149	7.00685	6.49592	6.50654	6.73265	6.63153	6.41745	5.95674	6.37219	6.15006	5.38743	5.42319	5.53633	5.44991
sp|Q8NDA8|MROH1_HUMAN	MROH1	MROH1_HUMAN Maestro heat-like repeat-containing protein family member 1	8	7.81101	6.28895	8.1002	8.61581	6.36198	6.42105	7.3211	6.99002	6.19277	6.3038	6.64313	6.18047	4.18619	4.96503	3.8124	3.80608
sp|Q9NQX3-2|GEPH_HUMAN	GPHN	GEPH_HUMAN Isoform 2 of Gephyrin	28	4.99888	4.66514	4.70289	5.0214	5.52645	5.84784	5.51207	5.84921	5.71134	6.23323	5.71998	6.24746	7.48583	7.92874	8.66482	9.88471
sp|Q92542|NICA_HUMAN	NCSTN	NICA_HUMAN Nicastrin	18	5.48799	3.21166	5.51233	5.83826	5.64266	5.70762	5.26932	5.60779	6.63282	7.03921	5.98404	6.89734	6.86231	7.50035	7.87914	8.92718
sp|Q9H0K6|PUS7L_HUMAN	PUS7L	PUS7L_HUMAN Pseudouridylate synthase 7 homolog-like protein	9	5.82348	6.35478	5.73038	5.86993	6.07518	6.22501	5.87474	6.02385	6.47122	6.39969	6.4177	6.41799	6.69054	6.3722	6.84992	6.4034
sp|P04040|CATA_HUMAN	CAT	CATA_HUMAN Catalase	36	5.00967	5.37013	4.75482	5.07407	5.67932	5.827	5.39098	5.82085	5.85905	6.13863	5.5866	6.31118	7.50025	7.57365	8.50186	9.60194
sp|O14578-4|CTRO_HUMAN	CIT	CTRO_HUMAN Isoform 4 of Citron Rho-interacting kinase	10	8.19984	8.38735	8.27682	7.94846	7.05205	6.59646	7.22396	6.35853	6.65315	5.33195	6.72753	5.60812	4.24178	4.32881	3.76961	3.29558
sp|O14578-3|CTRO_HUMAN	CIT	CTRO_HUMAN Isoform 3 of Citron Rho-interacting kinase	1	7.25032	7.43386	6.81519	6.43618	6.98145	5.29586	5.55206	6.28468	5.85518	5.61102	5.46984	7.24586	6.27265	5.53862	6.43136	5.52588
sp|Q14146|URB2_HUMAN	URB2	URB2_HUMAN Unhealthy ribosome biogenesis protein 2 homolog	5	11.0678	10.4066	10.7953	10.6228	6.18132	6.29542	6.55515	6.03962	4.74586	4.42516	4.91941	4.9919	3.09995	4.83119	2.45782	2.56466
sp|Q9GZR7|DDX24_HUMAN	DDX24	DDX24_HUMAN ATP-dependent RNA helicase DDX24	17	9.89832	9.69108	10.0975	10.1229	6.22164	6.09273	6.84944	6.39636	5.16518	4.66475	5.51161	5.03663	3.14821	5.44616	3.0737	2.58383
sp|Q9Y6Q9|NCOA3_HUMAN	NCOA3	NCOA3_HUMAN Nuclear receptor coactivator 3	12	5.30223	5.32618	5.34342	5.38406	5.69175	5.97493	5.87336	5.88497	6.01387	6.21291	6.32294	6.2208	8.21872	7.05013	7.84518	7.33453
sp|P41214|EIF2D_HUMAN	EIF2D	EIF2D_HUMAN Eukaryotic translation initiation factor 2D	16	7.21677	7.50198	7.296	6.92616	6.85532	6.34403	6.9997	6.4809	7.17973	6.1113	6.90538	6.04172	4.94872	5.09129	4.25973	3.84128
sp|P08243|ASNS_HUMAN	ASNS	ASNS_HUMAN Asparagine synthetase [glutamine-hydrolyzing]	72	8.72288	7.71357	8.68982	8.52678	7.15539	6.77098	7.49893	7.12642	6.17622	5.55494	6.49686	5.656	3.67701	4.36707	3.11993	2.7472
sp|A6NIH7|U119B_HUMAN	UNC119B	U119B_HUMAN Protein unc-119 homolog B	16	5.14956	5.38795	4.97779	5.29549	5.21655	5.27776	4.90805	5.38201	5.62602	6.08111	5.13389	6.03253	7.75287	8.02889	9.39885	10.3507
sp|Q13432|U119A_HUMAN	UNC119	U119A_HUMAN Protein unc-119 homolog A	5	5.59532	6.10243	4.88545	5.27052	5.81193	5.70859	5.65352	6.11889	5.93775	5.99259	5.60265	6.28256	7.05655	7.47993	7.43774	9.06358
sp|Q9Y383|LC7L2_HUMAN	LUC7L2	LC7L2_HUMAN Putative RNA-binding protein Luc7-like 2	19	8.27358	8.64965	8.03012	7.88257	6.03617	5.65237	6.11072	5.907	5.48135	5.13066	5.77779	5.43989	4.59689	5.61944	5.65214	5.75968
sp|Q9NQ29|LUC7L_HUMAN	LUC7L	LUC7L_HUMAN Putative RNA-binding protein Luc7-like 1	9	7.53184	7.48391	7.29431	7.37298	6.08647	5.93711	6.02502	6.21632	5.78724	5.52291	5.81079	5.68298	5.33543	5.83995	5.97865	6.09408
sp|Q9UGP4|LIMD1_HUMAN	LIMD1	LIMD1_HUMAN LIM domain-containing protein 1	24	4.81391	4.85939	5.15262	5.08107	5.61839	7.09643	6.33406	6.63335	5.60784	6.71698	6.65214	6.66285	6.61627	7.07732	7.41762	7.65976
sp|Q9NV79|PCMD2_HUMAN	PCMTD2	PCMD2_HUMAN Protein-L-isoaspartate O-methyltransferase domain-containing protein 2	1	7.46576	7.58023	7.76055	7.97127	6.95621	7.53792	6.38799	6.80495	6.37477	5.68185	6.133	6.7679	5.17374	4.69819	3.74129	2.96438
sp|Q9P2W1|HOP2_HUMAN	PSMC3IP	HOP2_HUMAN Homologous-pairing protein 2 homolog	9	4.80722	3.95422	5.07943	5.14496	5.7809	6.13014	5.78892	6.26341	5.88769	6.40296	5.99995	6.27143	7.30457	7.80898	8.74222	8.633
sp|O43633|CHM2A_HUMAN	CHMP2A	CHM2A_HUMAN Charged multivesicular body protein 2a	20	4.85133	4.65383	4.87815	4.97872	5.50761	6.31727	5.58736	5.9607	5.77155	6.51881	6.10515	6.46296	7.27686	7.50118	8.3247	9.30381
sp|O60287|NPA1P_HUMAN	URB1	NPA1P_HUMAN Nucleolar pre-ribosomal-associated protein 1	9	10.0309	10.1941	9.81722	10.2884	6.18846	5.796	6.33821	6.05767	5.03337	4.6166	5.27851	5.27631	3.29645	5.55867	2.95324	3.27582
sp|Q969G3|SMCE1_HUMAN	SMARCE1	SMCE1_HUMAN SWI/SNF-related matrix-associated actin-dependent regulator of chromatin subfamily E member 1	19	6.00414	6.2242	5.98457	5.74425	6.18731	6.33717	6.36154	6.19464	6.21944	6.39473	6.77296	6.43139	6.73354	6.11703	6.39902	5.89409
sp|P46459|NSF_HUMAN	NSF	NSF_HUMAN Vesicle-fusing ATPase	50	8.33691	8.6676	8.28322	7.99405	7.1079	6.70974	7.27278	6.96496	6.53333	5.94521	6.38123	5.91046	3.76269	4.33725	3.25115	2.54152
sp|Q9UHJ6|SHPK_HUMAN	SHPK	SHPK_HUMAN Sedoheptulokinase	7	6.85907	7.05457	7.1207	6.80727	6.86008	7.06037	7.54015	7.35051	6.71012	5.97262	6.95287	6.10488	5.12193	4.87381	4.25905	3.35201
sp|Q8IZQ5|SELH_HUMAN	SELH	SELH_HUMAN Selenoprotein H	3	5.64899	6.33242	6.17246	5.38203	6.81316	6.24377	6.02539	6.45987	6.17764	6.71754	6.37024	6.58353	7.04103	5.95776	6.55691	5.51726
sp|O60220|TIM8A_HUMAN	TIMM8A	TIM8A_HUMAN Mitochondrial import inner membrane translocase subunit Tim8 A	9	5.18974	5.58495	5.12267	6.20807	6.94196	7.28863	6.89249	7.12083	4.92068	7.05415	6.92581	7.13304	7.57389	5.57328	4.08606	6.38376
sp|Q13572|ITPK1_HUMAN	ITPK1	ITPK1_HUMAN Inositol-tetrakisphosphate 1-kinase	11	7.33712	7.79944	7.64901	7.8553	6.71097	5.86245	6.55774	6.11302	6.6861	5.99959	6.78539	6.06559	5.15186	5.26985	4.2271	3.92946
sp|Q6NS38|ALKB2_HUMAN	ALKBH2	ALKB2_HUMAN Alpha-ketoglutarate-dependent dioxygenase alkB homolog 2	7	6.31676	6.26632	6.49516	6.63654	6.55386	5.87824	6.08312	6.30899	6.86749	6.10199	6.57996	6.22215	5.92938	5.90112	5.8495	6.00945
sp|Q5T8P6-2|RBM26_HUMAN	RBM26	RBM26_HUMAN Isoform 2 of RNA-binding protein 26	32	7.1391	6.82184	7.02086	6.84362	6.76351	6.32013	6.67681	6.47515	6.6125	6.16885	6.48803	6.18839	5.55015	5.16035	5.23408	4.53662
sp|Q5T8P6-3|RBM26_HUMAN	RBM26	RBM26_HUMAN Isoform 3 of RNA-binding protein 26	1	6.89609	5.62909	7.69819	6.57969	6.88993	6.63513	6.60283	6.53592	6.87502	5.65376	7.22849	4.89874	6.52223	5.56527	5.28353	4.5061
tr|E2PSN0|E2PSN0_HUMAN	RBM26	E2PSN0_HUMAN RNA-binding protein 26 (Fragment)	1	4.76202	5.41198	5.06899	5.20082	5.639	5.4615	5.30111	6.37175	5.66212	7.66992	5.56862	6.80376	6.72884	6.95287	9.39315	8.00355
sp|Q9P2N5|RBM27_HUMAN	RBM27	RBM27_HUMAN RNA-binding protein 27	26	6.73042	6.44537	6.91034	6.80447	6.53744	5.85519	6.27363	5.8347	6.59887	5.98257	6.32789	6.03416	6.08873	6.04295	5.89941	5.63386
sp|O95081|AGFG2_HUMAN	AGFG2	AGFG2_HUMAN Arf-GAP domain and FG repeat-containing protein 2	3	5.10375	5.70332	4.66233	5.12057	5.37431	5.84027	4.93346	5.87892	5.59895	6.11805	5.51777	7.02368	7.45104	7.70324	7.91848	10.0518
sp|Q9NUP1|BL1S4_HUMAN	BLOC1S4	BL1S4_HUMAN Biogenesis of lysosome-related organelles complex 1 subunit 4	3	5.96821	3.03668	5.97488	6.14257	6.07541	6.79935	6.35354	6.49394	5.82049	6.42244	7.5459	7.1275	5.70725	6.39346	7.184	6.95438
sp|O95671|ASML_HUMAN	ASMTL	ASML_HUMAN N-acetylserotonin O-methyltransferase-like protein	20	6.78524	6.53839	6.97085	6.76475	6.79631	6.54035	7.12712	6.64003	6.95237	6.63268	6.91392	6.29452	5.27498	5.10488	4.64821	4.01541
sp|Q9NR77|PXMP2_HUMAN	PXMP2	PXMP2_HUMAN Peroxisomal membrane protein 2	2	7.57387	8.49508	7.56225	7.47018	6.5786	5.84366	6.53646	6.09056	6.37572	5.90137	5.46496	5.88531	4.86977	4.82241	5.00395	5.52585
sp|P25686|DNJB2_HUMAN	DNAJB2	DNJB2_HUMAN DnaJ homolog subfamily B member 2	1	4.14206	4.04091	3.85255	3.96943	5.65037	7.99698	7.41204	7.09316	5.43719	7.51463	7.92737	5.5237	6.07708	6.6613	8.30592	8.39531
sp|O75190|DNJB6_HUMAN	DNAJB6	DNJB6_HUMAN DnaJ homolog subfamily B member 6	6	7.14803	5.72774	7.55947	7.38833	6.35283	6.61462	6.59191	6.02565	6.55108	6.03917	6.41238	6.71502	5.3365	5.5779	5.36393	4.59544
sp|Q8TC07|TBC15_HUMAN	TBC1D15	TBC15_HUMAN TBC1 domain family member 15	30	7.42155	7.239	7.48948	7.34628	7.12872	6.97307	7.14362	6.88201	6.59505	6.42611	6.71118	6.55817	4.45616	4.69431	3.74498	3.19034
sp|P82933|RT09_HUMAN	MRPS9	RT09_HUMAN 28S ribosomal protein S9, mitochondrial	17	6.21417	6.72464	5.86988	5.74729	6.26315	5.80955	6.09804	5.94017	6.32297	6.07841	6.10947	6.2253	6.67214	6.53135	6.74445	6.64903
sp|Q9UJX4|APC5_HUMAN	ANAPC5	APC5_HUMAN Anaphase-promoting complex subunit 5	15	7.88437	8.38713	8.25742	7.92541	7.04549	6.69675	7.10051	7.02636	6.37836	5.97738	6.37934	6.24795	4.01913	4.42383	3.30583	2.94474
sp|O43502|RA51C_HUMAN	RAD51C	RA51C_HUMAN DNA repair protein RAD51 homolog 3	12	6.97393	7.26744	6.9725	7.04328	6.67524	6.26536	6.96033	6.50198	6.95768	6.48204	6.70244	6.73344	5.39994	4.89163	4.41415	3.75862
sp|P23229|ITA6_HUMAN	ITGA6	ITA6_HUMAN Integrin alpha-6	49	5.08564	5.10057	5.05549	5.21877	5.58295	5.98761	5.55684	5.72316	6.05275	6.45296	5.96039	6.28409	7.56182	7.48538	8.26982	8.62178
sp|Q9Y6W3|CAN7_HUMAN	CAPN7	CAN7_HUMAN Calpain-7	14	7.64182	6.66158	8.17333	8.43913	6.8081	6.61142	7.12559	6.8574	6.59991	6.02206	6.7733	6.2914	3.96092	4.70992	3.82953	3.49462
sp|Q9NX76|CKLF6_HUMAN	CMTM6	CKLF6_HUMAN CKLF-like MARVEL transmembrane domain-containing protein 6	2	5.6664	4.63945	6.31043	6.54091	6.58065	6.12884	5.5841	5.81974	5.88486	6.30434	6.08637	6.97838	6.59189	6.2181	5.56053	9.105
sp|Q86XZ4|SPAS2_HUMAN	SPATS2	SPAS2_HUMAN Spermatogenesis-associated serine-rich protein 2	10	8.92208	7.69919	8.76965	8.86439	5.80545	5.61106	6.26312	5.79645	5.25538	5.19163	5.39914	5.46371	4.67716	6.74461	4.93875	4.59823
sp|P49795|RGS19_HUMAN	RGS19	RGS19_HUMAN Regulator of G-protein signaling 19	3	5.2759	5.77696	5.5687	6.23153	5.93489	6.34917	5.99482	6.32597	6.70755	6.41584	6.35635	6.25191	6.41797	6.58169	6.82699	6.98376
sp|Q9H6Q4|NARFL_HUMAN	NARFL	NARFL_HUMAN Cytosolic Fe-S cluster assembly factor NARFL	4	6.10833	5.91375	6.04001	6.13919	6.32229	6.11523	6.04595	6.58691	6.94528	6.18078	6.35394	6.35205	6.79139	5.74809	6.13925	6.21756
sp|Q9UHQ1-2|NARF_HUMAN	NARF	NARF_HUMAN Isoform 2 of Nuclear prelamin A recognition factor	8	5.89672	6.96462	6.37676	5.97261	6.41311	5.82581	6.54105	6.18513	6.77895	6.45131	6.58563	6.20212	6.10529	5.688	6.40626	5.60663
sp|Q9BY89|K1671_HUMAN	KIAA1671	K1671_HUMAN Uncharacterized protein KIAA1671	18	6.39272	6.9877	6.54782	6.48611	6.11425	6.06623	5.75132	5.93671	6.24432	5.87173	5.94734	6.38574	5.99635	6.34895	6.23887	6.68384
sp|P00505|AATM_HUMAN	GOT2	AATM_HUMAN Aspartate aminotransferase, mitochondrial	68	5.06429	3.91566	4.84335	5.65884	5.69911	5.6936	5.25293	5.84867	5.41133	6.39628	5.72044	6.34462	7.02732	7.94669	8.80076	10.3761
sp|Q9UQR1|ZN148_HUMAN	ZNF148	ZN148_HUMAN Zinc finger protein 148	7	6.15384	5.87917	6.60671	6.36174	5.70793	6.37654	6.32546	6.21202	6.24879	6.17243	5.92482	6.12156	5.80883	8.19296	5.45148	6.45572
sp|Q66PJ3|AR6P4_HUMAN	ARL6IP4	AR6P4_HUMAN ADP-ribosylation factor-like protein 6-interacting protein 4	2	7.10776	7.66622	7.76879	7.39459	6.14819	5.79963	6.29273	5.92088	5.46818	5.39553	6.25497	5.66978	4.88484	5.39896	6.16493	6.66402
sp|Q02790|FKBP4_HUMAN	FKBP4	FKBP4_HUMAN Peptidyl-prolyl cis-trans isomerase FKBP4	124	5.98005	5.65102	5.88932	5.90014	6.57198	5.21439	6.73328	5.35349	5.54552	5.51635	8.19578	6.18698	6.70916	6.67682	7.35204	6.52368
sp|O00461|GOLI4_HUMAN	GOLIM4	GOLI4_HUMAN Golgi integral membrane protein 4	13	4.99806	5.93927	4.98357	5.02572	5.1964	4.97072	4.65361	4.91552	5.92363	5.90386	4.84479	6.02685	8.59257	7.96967	9.28074	10.775
sp|Q14566|MCM6_HUMAN	MCM6	MCM6_HUMAN DNA replication licensing factor MCM6	52	7.21362	7.03197	7.40111	7.22221	7.16033	6.77347	7.42865	6.79529	7.08028	6.37708	7.10779	6.24849	4.67277	4.47721	3.86365	3.14607
sp|Q99615|DNJC7_HUMAN	DNAJC7	DNJC7_HUMAN DnaJ homolog subfamily C member 7	32	6.58905	5.93996	6.50377	6.67631	6.78071	6.05273	6.66788	6.3484	6.7645	6.57181	6.78478	6.17296	6.1622	5.48386	5.95446	4.54661
sp|Q14008|CKAP5_HUMAN	CKAP5	CKAP5_HUMAN Cytoskeleton-associated protein 5	91	8.66715	8.08671	8.67338	8.76687	6.84958	6.87296	7.06197	6.97514	6.12413	5.8277	6.36546	5.98004	3.36885	4.56793	3.09696	2.71517
sp|P13984|T2FB_HUMAN	GTF2F2	T2FB_HUMAN General transcription factor IIF subunit 2	31	6.38427	5.87542	6.33395	6.2152	6.45075	6.0489	6.1133	5.96423	6.32611	5.90414	6.17469	6.09847	6.21416	5.98693	7.28223	6.62727
sp|P48163|MAOX_HUMAN	ME1	MAOX_HUMAN NADP-dependent malic enzyme	46	4.83455	4.66246	4.85274	5.0462	5.42161	6.0899	5.40899	5.88026	5.60954	6.55747	6.00098	6.47143	7.26628	7.82022	8.43211	9.64526
sp|Q06546|GABPA_HUMAN	GABPA	GABPA_HUMAN GA-binding protein alpha chain	21	5.58986	5.81356	5.5292	5.68625	6.2105	6.33725	6.04265	6.15209	6.43238	6.45944	6.31083	6.59444	6.71377	6.72508	6.71776	6.68495
sp|Q9P0K7-2|RAI14_HUMAN	RAI14	RAI14_HUMAN Isoform 2 of Ankycorbin	21	7.53481	7.95032	7.51099	7.12906	6.78456	6.50898	7.0694	6.56882	6.76675	6.06946	6.7596	6.33642	4.776	4.78454	4.07861	3.37166
sp|Q9Y2L9-3|LRCH1_HUMAN	LRCH1	LRCH1_HUMAN Isoform 3 of Leucine-rich repeat and calponin homology domain-containing protein 1	6	8.0724	9.04277	8.59745	8.13015	6.73422	6.34476	7.29633	6.58342	6.01128	5.6739	6.67408	6.67862	3.58705	4.47357	3.36711	2.73289
sp|Q8TEW0|PARD3_HUMAN	PARD3	PARD3_HUMAN Partitioning defective 3 homolog	18	6.89067	6.74457	6.66117	6.57658	6.44713	6.24236	6.67339	6.23367	6.45059	6.2682	6.56618	6.41687	5.72115	5.46292	5.605	5.03956
sp|Q8TEW0-8|PARD3_HUMAN	PARD3	PARD3_HUMAN Isoform 8 of Partitioning defective 3 homolog	2	6.1029	4.95685	5.77592	6.369	6.87071	6.87988	7.04586	5.70066	5.7571	6.47314	7.01162	6.00966	6.47561	7.06772	5.2907	6.21267
sp|P04818|TYSY_HUMAN	TYMS	TYSY_HUMAN Thymidylate synthase	14	7.14713	7.34295	7.25335	7.33522	6.87865	6.59496	6.74712	6.40078	6.69158	6.03751	6.61674	6.19638	4.99602	5.24087	4.56084	3.95991
sp|O75347|TBCA_HUMAN	TBCA	TBCA_HUMAN Tubulin-specific chaperone A	33	5.08804	5.49074	4.77363	5.12353	5.42817	5.86012	5.20179	5.67351	5.98588	6.22731	5.69946	6.49137	7.33157	7.57389	8.29727	9.75372
sp|P07355-2|ANXA2_HUMAN	ANXA2	ANXA2_HUMAN Isoform 2 of Annexin A2	37	6.40643	5.91687	6.35539	6.33721	7.09093	6.62681	6.87009	6.66344	7.19433	6.84124	6.81231	6.46125	6.76586	5.25704	4.95986	3.44094
tr|H0YL33|H0YL33_HUMAN	ANXA2	H0YL33_HUMAN Annexin (Fragment)	4	3.11138	12.352	2.84958	2.93959	5.00476	5.83529	7.17685	7.98698	6.89556	5.05512	3.95423	5.67002	13.9515	6.78829	6.12673	4.30208
tr|H0YMT9|H0YMT9_HUMAN	ANXA2	H0YMT9_HUMAN Annexin (Fragment)	1	6.79555	6.56361	6.27408	6.92072	6.85578	5.73069	5.52962	5.65769	6.55323	6.83558	5.95676	6.065	6.47396	5.03441	7.40535	5.34799
sp|P49792|RBP2_HUMAN	RANBP2	RBP2_HUMAN E3 SUMO-protein ligase RanBP2	156	7.3529	7.40286	7.42956	7.48732	6.83509	6.66742	6.9966	6.73236	6.35766	6.22645	6.66965	6.25024	4.68235	4.93356	4.23319	3.74278
sp|Q08752|PPID_HUMAN	PPID	PPID_HUMAN Peptidyl-prolyl cis-trans isomerase D	55	5.09969	5.5792	4.93671	5.05601	5.83744	5.94685	5.52346	5.94041	6.07206	6.37223	5.90857	6.38496	7.44152	7.34623	8.01143	8.54323
sp|P30405|PPIF_HUMAN	PPIF	PPIF_HUMAN Peptidyl-prolyl cis-trans isomerase F, mitochondrial	46	5.31806	5.81086	5.18178	5.46612	5.41306	5.55294	5.02458	5.54423	5.80679	6.02134	5.3407	6.19661	7.44855	7.74945	8.61128	9.51365
sp|Q8IWJ2|GCC2_HUMAN	GCC2	GCC2_HUMAN GRIP and coiled-coil domain-containing protein 2	57	5.25112	6.07675	5.0858	5.16962	5.54645	5.85506	5.4625	5.63092	5.82381	6.1709	5.78357	6.12084	7.29925	7.45566	8.35493	8.91282
sp|Q8WUA4|TF3C2_HUMAN	GTF3C2	TF3C2_HUMAN General transcription factor 3C polypeptide 2	8	8.39901	8.84763	8.66702	8.74803	6.39871	5.96564	6.54074	6.338	6.25321	5.17636	5.93765	5.64846	4.39625	5.4801	4.02121	3.18196
sp|Q8NI77|KI18A_HUMAN	KIF18A	KI18A_HUMAN Kinesin-like protein KIF18A	4	10.1349	11.6395	10.6568	11.0263	5.67314	5.45832	6.21116	5.73376	4.90797	4.46715	5.33619	4.62735	2.95369	5.5958	2.75412	2.82374
sp|Q9NTK5|OLA1_HUMAN	OLA1	OLA1_HUMAN Obg-like ATPase 1	67	6.10285	5.63311	6.2039	5.86869	7.15727	6.54705	6.98951	6.62817	7.40693	6.95132	7.18524	6.78828	7.16063	5.47347	4.84872	3.05486
sp|Q99666|RGPD5_HUMAN	RGPD5	RGPD5_HUMAN RANBP2-like and GRIP domain-containing protein 5/6	3	7.32555	7.73202	7.89257	7.61414	6.41218	5.88987	6.35996	6.12387	5.82955	5.93155	5.6219	5.87238	5.35719	5.57002	5.00494	5.46231
sp|Q05823|RN5A_HUMAN	RNASEL	RN5A_HUMAN 2-5A-dependent ribonuclease	4	8.16093	8.88951	9.14182	8.41582	6.19487	6.43427	7.32315	6.21197	5.90681	5.3017	6.2785	6.57479	3.79682	4.65282	3.51409	3.20214
sp|Q9UNP9-3|PPIE_HUMAN	PPIE	PPIE_HUMAN Isoform 3 of Peptidyl-prolyl cis-trans isomerase E	10	5.33722	5.65831	5.03854	5.66617	5.04827	4.83714	4.57477	4.90137	5.55765	5.67569	5.0921	5.81106	7.7439	8.66724	9.56777	10.8228
sp|Q66K14-2|TBC9B_HUMAN	TBC1D9B	TBC9B_HUMAN Isoform 2 of TBC1 domain family member 9B	16	7.62608	7.43493	7.93632	7.57064	6.74378	6.96996	7.15029	6.94412	6.2746	6.10782	6.71316	5.87484	4.37357	5.02223	3.99164	3.266
sp|Q8TBA6|GOGA5_HUMAN	GOLGA5	GOGA5_HUMAN Golgin subfamily A member 5	19	5.95079	5.67033	5.83935	6.24861	6.28553	6.50446	6.04166	6.32516	6.12931	6.47754	6.30609	6.68565	6.1839	6.27646	6.35209	6.72308
sp|A0JNW5|UH1BL_HUMAN	UHRF1BP1L	UH1BL_HUMAN UHRF1-binding protein 1-like	15	7.64972	7.70841	7.46335	7.35011	6.77249	6.6996	6.8503	6.38846	6.43279	6.16467	6.48663	6.13556	4.66912	4.95765	4.43894	3.83219
sp|Q6BDS2|URFB1_HUMAN	UHRF1BP1	URFB1_HUMAN UHRF1-binding protein 1	8	6.84203	11.286	7.09376	7.32446	6.3673	5.64447	5.83048	5.78829	6.78895	5.66293	5.76915	6.01867	5.47081	5.08153	4.58384	4.44735
sp|Q9BSJ8-2|ESYT1_HUMAN	ESYT1	ESYT1_HUMAN Isoform 2 of Extended synaptotagmin-1	36	6.99824	6.19857	7.04681	7.03668	6.97805	6.70754	6.95986	6.84977	7.01071	6.64613	6.74494	6.23745	5.12232	5.05345	4.56297	3.84651
sp|Q9BSJ8|ESYT1_HUMAN	ESYT1	ESYT1_HUMAN Extended synaptotagmin-1	1	6.93536	8.0084	7.44408	6.88252	7.0882	6.30253	6.72261	6.94815	6.55644	5.94437	6.34621	6.14231	5.1246	5.00196	5.1299	3.42237
sp|Q9NQ84-2|GPC5C_HUMAN	GPRC5C	GPC5C_HUMAN Isoform 2 of G-protein coupled receptor family C group 5 member C	4	5.71727	6.12449	5.35296	5.32986	6.09787	6.37824	6.12879	6.01209	6.16193	6.44056	6.23944	6.91105	6.68424	6.20558	6.65138	7.56423
sp|P12004|PCNA_HUMAN	PCNA	PCNA_HUMAN Proliferating cell nuclear antigen	67	5.73948	5.57311	5.60183	5.49251	6.39255	6.14888	6.16149	6.23111	6.49391	6.47852	6.34277	6.31486	7.21339	6.50402	6.9451	6.36647
sp|Q9Y6G9|DC1L1_HUMAN	DYNC1LI1	DC1L1_HUMAN Cytoplasmic dynein 1 light intermediate chain 1	34	7.3347	7.25505	7.54492	7.5703	6.59556	6.18055	6.61095	6.2751	6.71496	6.21481	6.04665	5.96189	5.70181	5.44552	4.72138	3.82585
sp|O43237|DC1L2_HUMAN	DYNC1LI2	DC1L2_HUMAN Cytoplasmic dynein 1 light intermediate chain 2	26	7.0282	6.81712	6.99838	7.16466	6.5647	6.49054	6.74159	6.73121	6.70552	6.34512	6.3708	6.27677	5.51597	5.44151	4.83779	3.9701
sp|Q9H869-9|YYAP1_HUMAN	YY1AP1	YYAP1_HUMAN Isoform 9 of YY1-associated protein 1	5	7.47298	7.74831	7.41468	6.57358	6.64103	6.31055	6.61389	5.94889	6.3165	5.32984	8.89844	7.12385	4.83956	4.6957	4.43891	3.63329
sp|O76075|DFFB_HUMAN	DFFB	DFFB_HUMAN DNA fragmentation factor subunit beta	5	5.09528	3.69012	5.28584	5.21075	6.15225	6.01413	5.785	5.93337	6.13412	6.68497	6.56642	6.45979	7.64696	7.38707	8.12697	7.82695
sp|Q8WUH1-2|CHUR_HUMAN	CHURC1	CHUR_HUMAN Isoform 2 of Protein Churchill	3	5.34306	6.03209	5.75264	6.11699	5.60767	5.83995	4.7306	5.66701	5.7075	5.79239	5.62308	6.52271	7.1635	7.50688	7.40081	9.19312
tr|H0YHI0|H0YHI0_HUMAN	CHURC1-FNTB	H0YHI0_HUMAN Protein CHURC1-FNTB (Fragment)	2	6.15204	7.0261	5.75184	6.75402	5.27163	6.05941	5.17129	5.33415	5.32228	6.2641	6.20079	6.42513	6.20706	7.17552	6.91514	7.96951
sp|P49356|FNTB_HUMAN	FNTB	FNTB_HUMAN Protein farnesyltransferase subunit beta	9	5.42044	4.27947	5.66588	5.54093	5.98056	6.35947	5.99026	5.99289	6.20947	6.61228	6.12215	6.26325	7.48875	6.83836	7.54226	7.69357
sp|O75116|ROCK2_HUMAN	ROCK2	ROCK2_HUMAN Rho-associated protein kinase 2	89	6.4532	6.47147	6.52824	6.59665	6.75112	6.5693	6.76456	6.54208	6.91915	6.69232	6.92955	6.63751	6.02235	5.17117	5.04676	3.90458
sp|Q13464|ROCK1_HUMAN	ROCK1	ROCK1_HUMAN Rho-associated protein kinase 1	37	6.42876	6.55833	6.46753	6.41027	6.92972	6.59835	6.86657	6.60387	6.90206	6.37325	6.97867	6.59206	5.98082	5.1157	4.91619	4.27786
sp|Q02241|KIF23_HUMAN	KIF23	KIF23_HUMAN Kinesin-like protein KIF23	17	8.14938	8.75435	8.66988	8.71103	6.28642	5.92102	6.26771	6.17526	6.21989	5.54904	5.97213	5.82361	4.15119	5.6117	3.95816	3.77923
tr|E7EUI6|E7EUI6_HUMAN	ITGB1	E7EUI6_HUMAN Integrin beta (Fragment)	1	4.11872	7.89813	4.52501	3.32129	5.53528	4.72515	4.40937	5.46398	7.29034	6.57114	3.7597	5.20109	10.1729	7.17387	9.72926	10.1047
sp|P05556|ITB1_HUMAN	ITGB1	ITB1_HUMAN Integrin beta-1	62	5.0143	5.27578	4.89502	5.18475	5.5388	5.85297	5.22047	5.68959	5.64541	6.40564	5.8793	6.26913	7.43651	7.5752	8.68572	9.4314
sp|Q14789|GOGB1_HUMAN	GOLGB1	GOGB1_HUMAN Golgin subfamily B member 1	127	5.63422	5.6534	5.66083	5.69808	6.06754	5.99316	5.88078	5.92615	6.12609	6.30203	6.14425	6.2586	6.76787	6.63536	7.51222	7.73942
sp|Q9NZW5|MPP6_HUMAN	MPP6	MPP6_HUMAN MAGUK p55 subfamily member 6	22	5.65202	5.69824	5.80019	5.67401	6.28705	6.1595	6.25294	5.98275	6.41375	6.46266	6.43981	6.40971	7.18007	6.54134	6.72532	6.32063
sp|Q14168|MPP2_HUMAN	MPP2	MPP2_HUMAN MAGUK p55 subfamily member 2	4	6.49385	5.88555	6.05671	6.92259	6.45838	5.94859	6.85203	6.56202	7.00294	6.47098	7.1381	6.48311	6.26259	5.21136	5.67955	4.57164
sp|P82094-2|TMF1_HUMAN	TMF1	TMF1_HUMAN Isoform 2 of TATA element modulatory factor	26	6.20627	6.81885	6.36041	6.36064	6.13658	6.22956	6.17956	6.30812	6.12333	6.26338	6.17562	6.33968	5.80723	5.98574	6.21242	6.49259
sp|O15118|NPC1_HUMAN	NPC1	NPC1_HUMAN Niemann-Pick C1 protein	11	5.48671	5.3964	5.42747	5.30473	6.39695	6.18991	6.14911	6.39348	6.20101	6.41608	6.20662	6.4398	7.00974	6.70151	7.03344	7.24704
sp|Q92619-2|HMHA1_HUMAN	HMHA1	HMHA1_HUMAN Isoform 2 of Minor histocompatibility protein HA-1	3	5.52734	6.35096	5.05082	5.70968	5.47745	5.2014	4.54264	4.69121	6.20725	5.9266	4.46332	5.64986	7.37649	8.2353	8.8209	10.7688
sp|Q86XS8|GOLI_HUMAN	RNF130	GOLI_HUMAN E3 ubiquitin-protein ligase RNF130	1	4.80838	5.13992	5.65461	5.62737	5.80434	6.42645	5.26919	6.20255	6.63815	7.0493	5.8387	6.04062	6.737	7.69394	7.00168	8.0678
sp|Q96QC0|PP1RA_HUMAN	PPP1R10	PP1RA_HUMAN Serine/threonine-protein phosphatase 1 regulatory subunit 10	19	7.77796	7.93506	7.98344	8.00634	6.22998	5.73511	6.19825	5.79283	5.84385	5.24061	5.79267	5.64805	5.30867	5.74679	5.48269	5.27769
sp|O15031|PLXB2_HUMAN	PLXNB2	PLXB2_HUMAN Plexin-B2	49	6.70262	6.75849	6.53623	6.48992	6.89985	6.6496	6.76111	6.64572	6.77655	6.43097	6.85107	6.36739	5.50832	5.1346	4.96301	4.52457
sp|Q9Y4D7|PLXD1_HUMAN	PLXND1	PLXD1_HUMAN Plexin-D1	5	6.67793	5.96942	6.48799	6.34593	6.50177	6.09582	6.96	6.85324	7.26668	6.31448	7.25839	6.06345	5.63791	5.43682	5.37024	4.75993
sp|Q7Z6V5|ADAT2_HUMAN	ADAT2	ADAT2_HUMAN tRNA-specific adenosine deaminase 2	7	5.06298	5.3819	4.91755	5.02232	5.67987	6.11523	5.23995	5.81919	6.037	6.23753	5.98588	6.01261	7.38096	7.73622	8.23129	9.1395
sp|P27824|CALX_HUMAN	CANX	CALX_HUMAN Calnexin	109	5.63234	5.46819	5.53658	5.62249	6.23405	6.04499	6.02851	6.15095	6.56605	6.70589	6.35302	6.50406	7.38197	6.43849	6.9429	6.38952
sp|Q9UJU6-3|DBNL_HUMAN	DBNL	DBNL_HUMAN Isoform 3 of Drebrin-like protein	24	5.15706	4.39026	5.19457	5.19847	5.90152	6.03835	5.68246	5.91667	5.95011	6.32241	6.06044	6.22572	7.75024	7.50274	8.42126	8.28772
sp|O15417|TNC18_HUMAN	TNRC18	TNC18_HUMAN Trinucleotide repeat-containing gene 18 protein	5	6.87998	6.40364	7.62319	6.77333	5.82501	6.03858	6.3281	6.45566	5.85432	5.56259	5.91026	6.6021	5.68813	6.32576	6.11392	5.61543
sp|Q9BZ29-4|DOCK9_HUMAN	DOCK9	DOCK9_HUMAN Isoform 4 of Dedicator of cytokinesis protein 9	20	8.84016	9.01133	9.21634	9.11619	6.69969	6.53061	7.20165	6.52048	6.179	5.33469	5.79628	5.52953	3.01882	4.82742	3.163	3.01481
sp|Q96CF2|CHM4C_HUMAN	CHMP4C	CHM4C_HUMAN Charged multivesicular body protein 4c	3	6.02894	6.44587	6.16804	6.05936	5.5092	5.39083	5.68103	5.57852	6.08146	6.21809	6.32183	6.95262	6.39978	7.48178	6.7794	6.90326
sp|P36543|VATE1_HUMAN	ATP6V1E1	VATE1_HUMAN V-type proton ATPase subunit E 1	13	5.77886	5.70143	5.68176	5.50703	6.18729	5.89706	6.09503	6.13073	6.56108	6.2831	6.27629	6.48824	7.47541	6.60661	7.03375	6.29634
sp|Q7L3B6|CD37L_HUMAN	CDC37L1	CD37L_HUMAN Hsp90 co-chaperone Cdc37-like 1	8	5.11951	5.38029	5.42227	5.3803	5.95025	5.97917	6.0076	5.9668	6.06548	6.53749	6.27271	6.45746	7.50453	7.09684	7.49435	7.36497
sp|Q9H173|SIL1_HUMAN	SIL1	SIL1_HUMAN Nucleotide exchange factor SIL1	6	6.76642	7.73055	6.97421	6.84782	6.97787	6.00546	6.65499	6.35262	6.88745	6.12455	6.18931	6.2982	5.5996	5.22768	5.07484	4.28842
sp|O00499-2|BIN1_HUMAN	BIN1	BIN1_HUMAN Isoform IIB of Myc box-dependent-interacting protein 1	19	5.15213	5.78648	5.15646	5.23554	6.12066	6.17985	5.70859	6.05165	6.35518	6.51468	6.10614	6.50945	7.39562	7.02432	7.11623	7.58703
sp|Q9NRJ4|TULP4_HUMAN	TULP4	TULP4_HUMAN Tubby-related protein 4	1	7.31123	7.13078	3.98946	8.72176	6.50581	8.11888	7.57511	6.81781	8.42448	6.96047	4.65045	5.71236	6.36303	5.30599	3.01297	3.39938
sp|Q9UBB9|TFP11_HUMAN	TFIP11	TFP11_HUMAN Tuftelin-interacting protein 11	15	9.17092	8.01508	9.36754	9.39125	6.24836	6.3311	6.62877	6.57232	5.51235	5.33325	5.76221	5.74834	3.70077	5.21412	3.54614	3.45747
sp|P49588|SYAC_HUMAN	AARS	SYAC_HUMAN Alanine--tRNA ligase, cytoplasmic	74	6.67114	5.36908	6.76208	6.91985	7.02948	6.93038	7.38145	7.06191	6.87702	6.6186	7.23028	6.42344	5.29443	5.0543	4.54165	3.83491
sp|Q9H5V8|CDCP1_HUMAN	CDCP1	CDCP1_HUMAN CUB domain-containing protein 1	32	5.66372	5.6911	5.73036	5.73237	6.39828	6.23725	6.17523	6.34121	6.3696	6.42426	6.0461	6.22083	6.81417	6.69263	6.6216	6.84128
sp|Q9Y4A5|TRRAP_HUMAN	TRRAP	TRRAP_HUMAN Transformation/transcription domain-associated protein	42	9.16031	8.79403	9.14318	9.32999	6.36201	6.27294	6.99352	6.44052	5.86996	5.36874	6.17004	5.55522	3.51076	4.95885	3.26725	2.80268
sp|P17480|UBF1_HUMAN	UBTF	UBF1_HUMAN Nucleolar transcription factor 1	14	9.66302	9.67598	9.87597	10.3768	6.59739	6.54062	6.18726	6.41737	5.14928	4.87858	5.59295	5.23319	3.04142	5.08515	3.0948	2.59021
sp|Q86TU7|SETD3_HUMAN	SETD3	SETD3_HUMAN Histone-lysine N-methyltransferase setd3	24	5.87325	5.36454	6.0132	5.64119	6.44342	6.29145	6.44954	6.25017	6.5715	6.48077	6.65993	6.45342	6.83445	6.2675	6.6112	5.79449
sp|P09110|THIK_HUMAN	ACAA1	THIK_HUMAN 3-ketoacyl-CoA thiolase, peroxisomal	14	5.65066	4.65913	5.50576	5.71349	6.52769	6.1327	6.24409	6.24508	6.82062	6.69221	6.41752	6.34231	7.23038	6.71118	6.91104	6.19614
sp|Q14257|RCN2_HUMAN	RCN2	RCN2_HUMAN Reticulocalbin-2	15	9.03892	9.70468	9.07199	8.61694	6.82786	6.39553	7.35529	6.65855	5.94132	5.3872	6.49599	5.60946	3.23074	4.49913	2.84521	2.3212
sp|Q9NWT6|HIF1N_HUMAN	HIF1AN	HIF1N_HUMAN Hypoxia-inducible factor 1-alpha inhibitor	4	5.36782	5.66663	5.76761	5.87972	6.12354	5.88434	5.90167	6.08414	6.44877	6.66379	6.67268	6.47959	7.0018	6.3721	6.8923	6.79352
sp|Q9H5N1|RABE2_HUMAN	RABEP2	RABE2_HUMAN Rab GTPase-binding effector protein 2	16	4.95528	5.23421	5.02757	5.09464	5.44753	5.99933	5.46429	5.78513	5.80916	6.39673	5.92257	6.56045	7.22874	7.47581	8.36511	9.23346
sp|O00429|DNM1L_HUMAN	DNM1L	DNM1L_HUMAN Dynamin-1-like protein	43	7.98464	8.09265	7.96338	7.50235	7.31541	6.54208	7.39762	6.71027	6.91629	5.92426	6.80159	6.02059	4.36449	4.30442	3.43549	2.72448
sp|Q969S3|ZN622_HUMAN	ZNF622	ZN622_HUMAN Zinc finger protein 622	17	7.84059	8.16344	7.99363	8.00017	6.70991	5.99705	6.50262	6.02737	6.04194	5.22456	6.17825	5.63915	4.49883	5.17252	5.24208	4.76789
sp|Q96TC7|RMD3_HUMAN	RMDN3	RMD3_HUMAN Regulator of microtubule dynamics protein 3	7	6.79109	7.50277	6.81616	6.54198	6.63847	6.66152	6.89666	6.86837	6.47131	6.70378	6.82934	6.50835	4.82501	5.15454	4.46675	4.32393
sp|P0C221|CC175_HUMAN	CCDC175	CC175_HUMAN Coiled-coil domain-containing protein 175	2	5.17231	5.20128	6.57555	5.67906	4.82009	13.3643	6.06819	9.53407	5.34673	4.87386	5.27235	5.39063	5.23704	5.53334	5.50308	6.42806
sp|Q9H8W3|F204A_HUMAN	FAM204A	F204A_HUMAN Protein FAM204A	1	8.08681	8.33689	8.49211	7.65778	6.85261	7.34898	6.68479	6.7685	5.84557	5.92646	6.03449	5.58807	3.945	5.07265	3.85398	3.50532
sp|A5YM69|ARG35_HUMAN	ARHGEF35	ARG35_HUMAN Rho guanine nucleotide exchange factor 35	1	5.88516	4.5063	4.70309	5.05918	6.40766	6.66907	5.54509	6.61323	6.09268	6.0468	5.77944	6.57688	6.11818	7.16159	8.2764	8.55924
tr|E9PEB9|E9PEB9_HUMAN	DST	E9PEB9_HUMAN Dystonin	118	6.68979	7.0357	6.80499	6.62599	6.49502	6.35952	6.64666	6.34238	6.70156	6.26144	6.50204	6.23068	5.58615	5.60328	5.27787	4.83693
sp|Q15149|PLEC_HUMAN	PLEC	PLEC_HUMAN Plectin	239	6.02697	5.97175	5.91141	5.95279	6.13248	6.34759	6.07643	6.22832	6.09352	6.29753	6.06162	6.34714	6.42623	6.49596	6.79679	6.83347
sp|Q15149-3|PLEC_HUMAN	PLEC	PLEC_HUMAN Isoform 3 of Plectin	3	5.55369	6.37697	4.83178	4.62163	5.63087	6.03505	5.66139	6.13742	6.15661	6.27195	5.67922	6.41809	7.31156	6.76467	8.07303	8.47609
sp|Q9UPN3-5|MACF1_HUMAN	MACF1	MACF1_HUMAN Isoform 4 of Microtubule-actin cross-linking factor 1, isoforms 1/2/3/5	158	6.06696	6.36444	6.20403	6.09992	6.42574	6.26215	6.38433	6.19065	6.55193	6.46305	6.59546	6.44662	6.63687	5.94039	6.10124	5.26622
sp|Q9UPN3-2|MACF1_HUMAN	MACF1	MACF1_HUMAN Isoform 2 of Microtubule-actin cross-linking factor 1, isoforms 1/2/3/5	53	6.24523	6.334	6.21168	6.22028	6.58306	6.48254	6.55491	6.30233	6.91088	6.54075	6.82651	6.54531	6.56132	5.58829	5.53233	4.56058
sp|P58107|EPIPL_HUMAN	EPPK1	EPIPL_HUMAN Epiplakin	28	7.57724	7.68717	7.8485	7.56728	6.88596	6.51377	6.89346	6.54125	6.33306	5.93159	6.14371	6.16637	4.52964	5.05142	4.50222	3.82736
sp|Q9NQ39|RS10L_HUMAN	RPS10P5	RS10L_HUMAN Putative 40S ribosomal protein S10-like	12	6.07803	6.30208	5.98017	6.32649	5.50719	5.48541	5.53073	5.58335	5.44083	5.62958	5.59449	5.56399	6.91915	7.33584	8.68517	8.03748
sp|Q12774|ARHG5_HUMAN	ARHGEF5	ARHG5_HUMAN Rho guanine nucleotide exchange factor 5	14	5.60254	6.2153	5.40846	5.56722	5.9659	6.33074	5.83658	5.83831	5.90813	6.43731	6.30121	6.27016	6.72897	7.14854	7.13118	7.30946
tr|E9PLY5|E9PLY5_HUMAN	MACF1	E9PLY5_HUMAN Microtubule-actin cross-linking factor 1, isoforms 1/2/3/5 (Fragment)	1	6.35537	5.56008	6.96419	6.48265	5.99919	6.33022	5.65174	6.09144	6.76247	6.64117	6.89463	7.3459	7.11224	5.77568	5.52899	4.50404
sp|Q9NZJ9-2|NUDT4_HUMAN	NUDT4	NUDT4_HUMAN Isoform 2 of Diphosphoinositol polyphosphate phosphohydrolase 2	7	5.45187	5.21848	5.81685	5.67284	6.40496	6.15685	6.20744	6.14515	6.26356	6.43312	6.5045	6.37565	7.39125	6.58536	7.08533	6.28679
sp|Q9NZJ9|NUDT4_HUMAN	NUDT4	NUDT4_HUMAN Diphosphoinositol polyphosphate phosphohydrolase 2	1	5.66152	4.11646	5.7269	5.10217	6.21148	6.43467	6.19632	6.04212	6.67368	6.53139	7.01054	7.11511	8.07368	6.09656	6.86827	6.13911
sp|O95989|NUDT3_HUMAN	NUDT3	NUDT3_HUMAN Diphosphoinositol polyphosphate phosphohydrolase 1	7	5.09405	4.8992	4.73023	5.17012	5.44629	5.81591	5.62791	5.81534	5.72972	6.62353	5.11577	6.49387	7.731	7.5823	8.15801	9.96675
tr|S4R435|S4R435_HUMAN	RPS10-NUDT3	S4R435_HUMAN Protein RPS10-NUDT3 (Fragment)	11	5.86058	6.81594	5.733	6.02931	5.7785	5.7256	5.59207	5.53998	5.67692	5.78443	6.38883	6.07031	6.47657	6.74961	7.86524	7.91312
sp|Q15853|USF2_HUMAN	USF2	USF2_HUMAN Upstream stimulatory factor 2	3	6.36051	6.20147	6.97572	7.32958	5.95775	6.289	6.17593	6.23093	6.2433	6.25005	6.49924	6.04156	5.41728	6.29886	5.8487	5.88011
sp|P53816|HRSL3_HUMAN	PLA2G16	HRSL3_HUMAN HRAS-like suppressor 3	3	5.50858	5.99799	5.09882	4.96822	5.56003	5.74578	4.94113	5.53089	6.32363	5.99465	5.12751	6.72512	7.57038	7.74825	8.43303	8.726
sp|Q9BYM8|HOIL1_HUMAN	RBCK1	HOIL1_HUMAN RanBP-type and C3HC4-type zinc finger-containing protein 1	11	5.03895	5.76748	5.21913	5.16879	5.64153	6.07223	5.62362	5.83889	6.05325	6.52048	5.8422	6.28889	7.24123	7.19163	7.97815	8.51357
sp|Q68CR1|SE1L3_HUMAN	SEL1L3	SE1L3_HUMAN Protein sel-1 homolog 3	8	7.36036	7.42038	7.31699	7.66634	6.34155	5.97094	6.67842	6.45366	6.3605	5.96523	6.16227	6.03785	5.28297	5.61518	4.88002	4.48733
sp|P62993|GRB2_HUMAN	GRB2	GRB2_HUMAN Growth factor receptor-bound protein 2	28	4.82131	5.36868	4.79588	4.9658	5.15128	5.71025	5.11916	5.48441	5.59912	6.31847	5.96665	6.49245	7.61532	8.00574	8.61642	9.96906
sp|O75153|CLU_HUMAN	CLUH	CLU_HUMAN Clustered mitochondria protein homolog	60	5.7702	4.90529	5.74129	5.7615	6.64025	6.34243	6.67771	6.39288	6.93263	6.79456	6.92377	6.44145	7.19513	6.08278	6.25535	5.1428
tr|I3L2B0|I3L2B0_HUMAN	CLUH	I3L2B0_HUMAN Clustered mitochondria protein homolog	5	6.09045	5.77811	6.47594	6.08115	6.7862	6.26372	7.1269	6.09153	7.21214	6.81773	6.93352	6.85519	6.33651	5.79072	5.42834	3.93185
sp|Q8N5F7|NKAP_HUMAN	NKAP	NKAP_HUMAN NF-kappa-B-activating protein	1	8.68321	9.29045	9.03896	8.5727	6.3578	5.13012	5.36466	6.0482	4.86744	4.90966	5.71773	5.71744	4.39899	6.61479	4.97679	4.31103
sp|Q14152|EIF3A_HUMAN	EIF3A	EIF3A_HUMAN Eukaryotic translation initiation factor 3 subunit A	83	9.37393	9.32139	9.27057	9.11842	7.20611	6.61064	7.88581	6.99127	5.75356	4.98133	6.50463	5.21281	2.85945	4.10151	2.69964	2.10895
sp|Q9UBT6|POLK_HUMAN	POLK	POLK_HUMAN DNA polymerase kappa	3	7.51245	7.4134	6.9294	8.15763	6.75592	6.01425	6.9194	7.02304	6.81463	6.2413	6.32262	6.33165	4.67174	5.17857	4.10442	3.60958
sp|A6NDB9|PALM3_HUMAN	PALM3	PALM3_HUMAN Paralemmin-3	5	5.74305	5.7208	5.42402	5.73316	5.45038	5.84618	5.32614	6.22467	6.13288	6.17026	5.45849	5.84226	7.50484	7.38248	7.16484	8.87555
sp|P24385|CCND1_HUMAN	CCND1	CCND1_HUMAN G1/S-specific cyclin-D1	7	6.08883	6.46247	6.19954	5.90813	6.57088	6.66354	6.66554	6.5168	6.49776	6.36321	7.02396	6.72729	5.92304	5.57465	5.39234	5.42201
sp|P30281|CCND3_HUMAN	CCND3	CCND3_HUMAN G1/S-specific cyclin-D3	1	5.70106	6.22541	5.49093	5.60286	5.81625	5.24975	5.87749	7.24711	6.07787	6.162	7.14862	6.31375	6.89625	7.00504	7.38375	5.80187
sp|Q99487|PAFA2_HUMAN	PAFAH2	PAFA2_HUMAN Platelet-activating factor acetylhydrolase 2, cytoplasmic	10	6.38366	4.70472	6.49864	6.4271	6.54961	6.07879	6.56995	6.42044	6.53983	6.48059	6.72497	6.80062	6.56766	6.01251	5.74404	5.49688
sp|P11387|TOP1_HUMAN	TOP1	TOP1_HUMAN DNA topoisomerase 1	24	11.9511	10.289	11.9809	12.6232	6.03401	5.37527	6.56468	5.90062	4.55082	4.16461	4.71652	4.11007	1.94507	6.19127	1.97204	1.63083
sp|Q8NBN3|TM87A_HUMAN	TMEM87A	TM87A_HUMAN Transmembrane protein 87A	8	6.15646	6.05885	6.42026	6.50502	6.33838	6.28456	6.21519	6.34631	6.19481	6.84687	6.53909	6.21889	6.21691	6.08915	5.98313	5.58611
sp|Q9H0B6|KLC2_HUMAN	KLC2	KLC2_HUMAN Kinesin light chain 2	34	5.56554	5.89996	5.81862	5.75911	6.52518	6.13192	6.41536	6.09967	7.03126	6.75301	7.12741	6.75151	7.61212	5.84496	6.15769	4.50669
sp|Q6P597-3|KLC3_HUMAN	KLC3	KLC3_HUMAN Isoform 3 of Kinesin light chain 3	14	5.71926	5.40997	5.86655	5.78939	6.7175	6.26277	6.7657	6.42557	7.04915	6.76225	7.03349	6.53232	7.70161	5.82989	5.94346	4.19112
tr|G3V5R9|G3V5R9_HUMAN	KLC1	G3V5R9_HUMAN Kinesin light chain 1	27	5.68873	5.46055	5.7395	5.48633	6.71768	6.41945	6.62296	6.19644	7.10346	6.49944	6.85217	6.29115	7.64501	5.92753	6.4086	4.94101
sp|Q9NSK0-3|KLC4_HUMAN	KLC4	KLC4_HUMAN Isoform 3 of Kinesin light chain 4	20	5.55202	5.37891	5.90662	5.84769	6.43568	6.03898	6.58689	6.25246	7.078	6.70093	6.98908	6.78287	7.50957	6.02829	6.14504	4.76698
sp|Q96JN8|NEUL4_HUMAN	NEURL4	NEUL4_HUMAN Neuralized-like protein 4	5	9.28179	9.47197	9.02744	9.00571	6.81161	5.43126	6.37857	6.45607	5.9242	5.56741	5.57632	5.56503	3.69002	5.03654	3.78051	2.99556
sp|Q9BYN8|RT26_HUMAN	MRPS26	RT26_HUMAN 28S ribosomal protein S26, mitochondrial	8	6.10141	6.31355	5.86517	6.0082	6.02822	5.9012	6.00023	5.94496	6.06856	6.21631	6.04902	6.1102	6.63664	6.75678	6.91461	7.08494
sp|Q9BWH2|FUND2_HUMAN	FUNDC2	FUND2_HUMAN FUN14 domain-containing protein 2	4	5.11935	5.07105	5.57805	5.23058	6.12888	5.39311	5.84948	4.84413	6.15514	6.81346	5.60551	6.77846	7.89407	7.52571	7.66159	8.35144
sp|Q5T0F9|C2D1B_HUMAN	CC2D1B	C2D1B_HUMAN Coiled-coil and C2 domain-containing protein 1B	16	5.69395	5.28156	6.18793	6.14482	6.57143	6.46551	6.51941	6.29032	6.56195	6.66768	7.1676	6.69105	6.57044	5.90833	6.23716	5.04082
sp|Q9H1B7|I2BPL_HUMAN	IRF2BPL	I2BPL_HUMAN Interferon regulatory factor 2-binding protein-like	28	5.50666	5.40832	5.51095	5.74376	5.99689	6.21078	5.97764	6.13708	6.20533	6.67668	6.18941	6.54466	7.04517	6.85053	6.74627	7.24987
sp|Q7Z5L9|I2BP2_HUMAN	IRF2BP2	I2BP2_HUMAN Interferon regulatory factor 2-binding protein 2	7	5.26224	5.32486	5.34854	5.61778	5.67664	5.77314	5.19022	5.47409	5.75433	6.75036	5.98496	6.10599	7.31272	7.20359	8.42366	8.79688
sp|Q7Z5L9-2|I2BP2_HUMAN	IRF2BP2	I2BP2_HUMAN Isoform 2 of Interferon regulatory factor 2-binding protein 2	1	4.53819	4.29518	4.88963	4.90557	5.2036	6.24061	5.7471	5.75784	6.38391	6.56978	6.3175	6.8931	7.05705	7.93884	8.41857	8.84354
sp|P11234|RALB_HUMAN	RALB	RALB_HUMAN Ras-related protein Ral-B	17	5.19569	5.77065	5.0998	5.16603	5.82657	6.16696	5.57606	5.99371	6.06592	6.27652	5.89844	6.15432	6.994	7.35071	7.8901	8.57451
sp|P11233|RALA_HUMAN	RALA	RALA_HUMAN Ras-related protein Ral-A	7	5.03393	7.11855	5.18596	5.3386	5.29031	6.1607	5.3053	6.13728	5.79643	6.45303	6.09995	6.5601	6.63987	6.83441	7.41056	8.63503
sp|P52565|GDIR1_HUMAN	ARHGDIA	GDIR1_HUMAN Rho GDP-dissociation inhibitor 1	26	4.61688	4.43206	4.48969	5.0599	5.29566	4.95003	4.69246	5.30291	5.9001	6.42336	5.61734	6.90045	8.62568	7.87432	9.75155	10.0676
sp|Q96B26|EXOS8_HUMAN	EXOSC8	EXOS8_HUMAN Exosome complex component RRP43	13	5.25581	5.44107	5.16537	5.27908	5.68853	5.79115	5.50048	5.6462	6.04883	6.49815	5.73494	5.92956	7.97294	7.36797	8.25788	8.42204
sp|Q9UQ80|PA2G4_HUMAN	PA2G4	PA2G4_HUMAN Proliferation-associated protein 2G4	80	6.53763	6.3038	6.58233	6.49101	6.49827	6.39813	6.70986	6.44836	6.26112	6.11127	6.68856	6.24655	6.03056	5.7104	5.89628	5.08586
sp|Q9UHY7|ENOPH_HUMAN	ENOPH1	ENOPH_HUMAN Enolase-phosphatase E1	16	4.92858	4.52948	5.11209	4.86445	5.91229	5.98121	5.49875	5.7724	6.55313	6.6672	5.99063	6.8223	7.65898	7.02735	8.08679	8.59438
sp|O95487|SC24B_HUMAN	SEC24B	SC24B_HUMAN Protein transport protein Sec24B	22	7.62912	7.4306	7.62181	7.35069	7.00489	6.50568	7.27695	6.91614	6.47791	6.09925	6.6733	6.16943	4.73397	4.5694	4.05034	3.49053
sp|O95486|SC24A_HUMAN	SEC24A	SC24A_HUMAN Protein transport protein Sec24A	17	6.91141	5.87809	7.17026	6.84143	7.29203	7.18768	7.69067	7.46789	6.69891	6.58217	7.43493	6.42085	4.6826	4.48247	3.96015	3.29847
sp|Q96EU7|C1GLC_HUMAN	C1GALT1C1	C1GLC_HUMAN C1GALT1-specific chaperone 1	13	6.46233	6.5054	6.69372	6.50516	6.72997	6.46755	6.42128	6.32379	7.16664	6.80444	6.41507	6.45578	5.86088	5.67889	4.97687	4.53222
sp|Q8IWS0|PHF6_HUMAN	PHF6	PHF6_HUMAN PHD finger protein 6	9	8.11458	8.65275	8.12955	7.74151	6.38459	5.82953	6.72013	6.06434	6.13594	5.48558	5.94673	5.66921	5.04481	5.5088	4.51568	4.05626
sp|Q8WYA0|IFT81_HUMAN	IFT81	IFT81_HUMAN Intraflagellar transport protein 81 homolog	10	6.90605	6.94502	7.01886	7.0838	6.42561	6.17184	6.53031	6.1223	6.38753	6.14462	6.4113	6.40371	5.34482	5.68923	5.20053	5.21448
sp|Q9H4A4|AMPB_HUMAN	RNPEP	AMPB_HUMAN Aminopeptidase B	52	5.04721	5.108	5.05072	5.01683	6.07524	6.03373	5.7664	5.89951	6.29568	6.46377	6.34056	6.44499	7.84332	7.20684	7.89214	7.51504
sp|P48729|KC1A_HUMAN	CSNK1A1	KC1A_HUMAN Casein kinase I isoform alpha	16	6.96979	6.69312	6.66245	6.87121	6.29126	5.87324	6.30043	5.8769	6.53112	6.01385	6.10714	5.82538	6.32622	5.88368	6.37199	5.40222
tr|H7BYY4|H7BYY4_HUMAN	PSTK	H7BYY4_HUMAN L-seryl-tRNA(Sec) kinase (Fragment)	1	7.50645	8.19941	8.48078	7.16869	6.97702	6.02875	7.0421	7.08192	7.82307	5.9247	5.16121	5.35547	4.05728	5.495	3.63276	4.06539
sp|Q6UN15-5|FIP1_HUMAN	FIP1L1	FIP1_HUMAN Isoform 5 of Pre-mRNA 3'-end-processing factor FIP1	14	7.81886	9.12048	8.11988	7.8076	6.25821	6.17762	6.50523	6.08	5.93372	5.48699	5.94728	5.65866	4.47111	5.35615	4.71268	4.54553
sp|Q6UN15-3|FIP1_HUMAN	FIP1L1	FIP1_HUMAN Isoform 3 of Pre-mRNA 3'-end-processing factor FIP1	1	8.85849	9.63131	8.53166	8.24515	6.01917	5.88218	6.58131	6.01469	5.5234	4.73576	5.90093	5.70462	4.22737	5.33198	4.92713	3.88485
sp|P05204|HMGN2_HUMAN	HMGN2	HMGN2_HUMAN Non-histone chromosomal protein HMG-17	2	5.3596	5.37826	5.29443	5.14811	5.53009	5.50647	5.55561	5.45504	5.5481	6.03283	5.96056	6.29208	7.30619	7.29523	9.20362	9.13378
sp|Q9UBB4|ATX10_HUMAN	ATXN10	ATX10_HUMAN Ataxin-10	34	7.0028	6.58111	6.86739	7.09435	6.79147	6.59404	6.94908	6.72213	6.58658	6.45836	6.48808	6.34416	5.35189	5.4702	4.54661	4.15173
sp|P67936|TPM4_HUMAN	TPM4	TPM4_HUMAN Tropomyosin alpha-4 chain	5	4.96477	5.36181	4.84724	5.30958	5.53015	5.83781	5.20085	5.69108	5.47931	6.50517	5.34943	6.74875	7.20494	7.74404	8.3481	9.87696
sp|P06753-2|TPM3_HUMAN	TPM3	TPM3_HUMAN Isoform 2 of Tropomyosin alpha-3 chain	38	5.02631	5.3806	4.84924	5.16559	5.32518	5.80952	5.0521	5.55119	5.78059	6.26526	5.4605	6.35994	7.35806	7.74761	8.67885	10.1895
tr|H7BYY1|H7BYY1_HUMAN	TPM1	H7BYY1_HUMAN Tropomyosin 1 (Alpha), isoform CRA_m	13	4.89547	5.67363	4.92876	4.84933	5.28974	6.59507	5.64719	5.81984	5.67245	6.62985	6.29037	6.64256	6.77076	7.60327	7.7141	8.97761
sp|P07951-2|TPM2_HUMAN	TPM2	TPM2_HUMAN Isoform 2 of Tropomyosin beta chain	38	4.84471	5.55107	4.95833	5.07433	5.41688	6.46303	5.77506	5.84203	5.54838	6.49338	6.13317	7.05651	6.7654	6.71049	7.85704	9.51017
sp|P67936-2|TPM4_HUMAN	TPM4	TPM4_HUMAN Isoform 2 of Tropomyosin alpha-4 chain	15	4.91267	5.20021	4.80234	5.27733	4.92053	5.22032	4.95776	5.26303	5.28545	6.29261	5.36031	5.95128	7.93393	8.47926	9.66781	10.4752
tr|Q5TCU3|Q5TCU3_HUMAN	TPM2	Q5TCU3_HUMAN Tropomyosin beta chain	5	5.11875	6.92239	5.34029	5.04736	5.33256	6.35086	5.59779	5.49906	5.72676	6.38788	5.85576	6.6053	6.78189	7.00017	7.57643	8.85675
sp|P06753|TPM3_HUMAN	TPM3	TPM3_HUMAN Tropomyosin alpha-3 chain	54	4.54921	5.34343	4.71885	4.83847	4.98018	5.87636	5.09381	5.39377	5.8092	6.34579	5.59599	7.221	7.43712	7.2624	8.45716	11.0773
tr|K7ERG3|K7ERG3_HUMAN	TPM4	K7ERG3_HUMAN Tropomyosin alpha-4 chain (Fragment)	1	4.77558	4.66752	4.04803	4.45052	4.90491	5.11604	4.61705	5.22234	4.7578	6.88402	5.45963	5.21819	9.25473	8.74911	10.8382	11.0363
sp|Q8WVB6|CTF18_HUMAN	CHTF18	CTF18_HUMAN Chromosome transmission fidelity protein 18 homolog	12	10.179	10.1074	10.1703	10.1755	6.43469	6.63351	7.47419	6.74375	5.72296	5.00392	5.98739	5.16112	2.37861	4.14871	1.96916	1.70971
sp|P18433|PTPRA_HUMAN	PTPRA	PTPRA_HUMAN Receptor-type tyrosine-protein phosphatase alpha	12	5.16499	4.71995	5.4469	5.56416	6.09432	5.96811	6.1085	6.04315	6.44643	6.78778	6.85825	6.77869	7.16868	6.56757	7.38801	6.89451
sp|P23469|PTPRE_HUMAN	PTPRE	PTPRE_HUMAN Receptor-type tyrosine-protein phosphatase epsilon	5	6.02334	5.98127	6.08219	6.55626	6.53504	6.35609	6.52656	6.41957	6.7394	6.72466	6.39895	5.94351	5.99906	6.46665	5.92962	5.31782
sp|Q3LXA3|DHAK_HUMAN	DAK	DHAK_HUMAN Bifunctional ATP-dependent dihydroxyacetone kinase/FAD-AMP lyase (cyclizing)	30	5.30143	4.28273	5.48091	5.3062	6.43528	6.47747	6.40042	6.27125	6.60207	6.79665	6.80478	6.60216	7.58487	6.54926	6.94353	6.16099
sp|Q0PNE2|ELP6_HUMAN	ELP6	ELP6_HUMAN Elongator complex protein 6	13	6.72475	7.70084	6.14296	6.26871	6.33467	6.06424	6.06254	6.12817	6.57525	6.15139	5.87029	6.06159	6.04939	5.70122	6.07771	6.08628
sp|Q9UGN5|PARP2_HUMAN	PARP2	PARP2_HUMAN Poly [ADP-ribose] polymerase 2	6	7.87646	7.32255	8.09648	7.83296	6.78323	6.56334	7.56866	6.47697	6.49394	5.82094	6.23263	5.77981	4.6354	5.20401	3.72317	3.58945
sp|Q8WWM7|ATX2L_HUMAN	ATXN2L	ATX2L_HUMAN Ataxin-2-like protein	60	5.02423	4.97216	5.03913	5.01794	5.59246	6.28703	5.97969	6.05683	5.92601	6.41108	6.54357	6.1805	7.58421	7.34304	8.12887	7.91324
tr|H3BUF6|H3BUF6_HUMAN	ATXN2L	H3BUF6_HUMAN Ataxin-2-like protein	1	4.09738	6.24789	6.25468	6.14337	6.66562	4.54127	6.45261	5.61468	4.28393	6.01652	7.32494	6.87363	6.74079	7.86256	7.47897	7.40117
sp|Q99700|ATX2_HUMAN	ATXN2	ATX2_HUMAN Ataxin-2	28	5.85627	5.7764	5.69338	5.87284	5.84067	5.5939	5.79341	5.56087	5.77818	5.91558	6.24448	5.95682	7.36647	6.97087	8.24498	7.53489
tr|F8WB05|F8WB05_HUMAN	ATXN2	F8WB05_HUMAN Ataxin-2 (Fragment)	2	5.72931	6.26018	5.81943	6.1697	6.60585	5.30947	5.92124	5.36567	5.95971	5.53593	6.97418	5.45414	7.35288	6.65697	7.4671	7.41824
sp|P14735|IDE_HUMAN	IDE	IDE_HUMAN Insulin-degrading enzyme	66	5.7549	5.78974	5.82925	5.61562	6.55309	6.32016	6.29583	6.31393	6.81258	6.51617	6.57953	6.30528	7.22763	6.26957	6.30796	5.50877
sp|P14618-2|KPYM_HUMAN	PKM	KPYM_HUMAN Isoform M1 of Pyruvate kinase PKM	293	6.09806	5.96557	6.28007	6.02809	6.84867	6.40317	6.78848	6.55413	7.35434	6.78595	6.96282	6.63388	6.55907	5.43027	5.12884	4.1786
sp|P14618|KPYM_HUMAN	PKM	KPYM_HUMAN Pyruvate kinase PKM	40	5.38893	5.00864	5.92569	5.96461	6.47218	6.8585	7.25254	7.22013	6.72005	6.91616	8.43415	6.5289	6.39048	5.60598	5.15987	4.15319
sp|P30613|KPYR_HUMAN	PKLR	KPYR_HUMAN Pyruvate kinase PKLR	23	5.79479	8.72705	5.79507	5.60332	6.52963	6.23459	6.28278	6.53501	7.22638	6.66134	6.37284	6.92979	6.8269	5.40339	4.95518	4.12194
sp|P07237|PDIA1_HUMAN	P4HB	PDIA1_HUMAN Protein disulfide-isomerase	227	4.9819	5.3629	4.72443	5.0057	5.3879	5.7319	5.06906	5.67687	5.72919	6.53935	5.58901	6.06879	7.33872	8.1713	8.42098	10.202
sp|O94761|RECQ4_HUMAN	RECQL4	RECQ4_HUMAN ATP-dependent DNA helicase Q4	7	7.16971	7.8936	7.5142	7.44103	6.30048	6.50763	6.64591	6.07765	6.07301	6.15095	6.55662	6.18533	4.88668	5.44968	4.50372	4.64378
sp|P14854|CX6B1_HUMAN	COX6B1	CX6B1_HUMAN Cytochrome c oxidase subunit 6B1	9	5.03324	5.48857	4.72892	5.98316	6.30883	6.7737	5.86608	6.31259	5.20749	7.12609	6.50608	7.52597	7.56379	6.41384	4.57492	8.58671
sp|Q8TD16-2|BICD2_HUMAN	BICD2	BICD2_HUMAN Isoform 2 of Protein bicaudal D homolog 2	34	4.82708	5.0656	4.8506	5.04098	5.61388	6.34626	5.70916	6.10075	5.64109	6.56522	6.16233	6.60953	7.06444	7.45439	7.92979	9.01889
sp|Q96G01|BICD1_HUMAN	BICD1	BICD1_HUMAN Protein bicaudal D homolog 1	19	5.30004	5.55211	5.1631	5.16569	5.73805	5.80347	5.45186	5.72419	5.93654	6.10065	6.01959	6.40309	7.05521	7.15744	8.35878	9.0702
sp|O14617-5|AP3D1_HUMAN	AP3D1	AP3D1_HUMAN Isoform 5 of AP-3 complex subunit delta-1	42	10.3688	9.82685	10.4789	10.4762	6.53074	6.32605	7.33201	6.71237	5.21897	4.9289	5.60186	4.97494	2.46469	4.48063	2.27324	2.00488
sp|Q5T4S7-2|UBR4_HUMAN	UBR4	UBR4_HUMAN Isoform 2 of E3 ubiquitin-protein ligase UBR4	116	8.96528	8.02615	9.17473	9.15288	7.09561	6.77737	7.65691	7.10792	6.19139	5.49552	6.58372	5.85964	2.98892	4.19569	2.59181	2.13646
sp|P20700|LMNB1_HUMAN	LMNB1	LMNB1_HUMAN Lamin-B1	25	6.8745	7.11017	6.74337	6.65991	6.43223	6.4489	6.64782	6.53952	6.39853	6.22607	6.4329	6.35773	5.33851	5.50156	5.25876	5.02952
sp|Q03252|LMNB2_HUMAN	LMNB2	LMNB2_HUMAN Lamin-B2	26	6.79978	6.55258	6.7872	6.61935	6.75389	6.53849	6.6512	6.60667	6.49464	6.37082	6.43224	6.14424	5.85146	5.48303	5.15068	4.76373
sp|P02545|LMNA_HUMAN	LMNA	LMNA_HUMAN Prelamin-A/C	60	5.74226	5.93536	5.57453	5.37956	6.05394	6.48074	6.23389	6.33478	6.1502	6.34827	6.34307	6.34142	6.42947	6.49016	6.97894	7.18341
sp|Q96HC4|PDLI5_HUMAN	PDLIM5	PDLI5_HUMAN PDZ and LIM domain protein 5	33	5.15887	4.33251	4.97508	5.50617	5.49644	5.70528	5.25631	5.63574	5.66758	6.17477	5.63033	6.31683	7.84087	7.66145	8.5719	10.0699
sp|O95394-4|AGM1_HUMAN	PGM3	AGM1_HUMAN Isoform 3 of Phosphoacetylglucosamine mutase	36	5.76699	5.51944	5.65795	5.54648	6.78844	6.34521	6.45815	6.48495	7.15245	6.79111	6.6458	6.65569	7.32908	6.0289	5.89687	4.9325
sp|Q14149|MORC3_HUMAN	MORC3	MORC3_HUMAN MORC family CW-type zinc finger protein 3	36	6.96255	6.26152	6.98838	7.02251	6.91571	6.45538	6.99804	6.66342	6.92946	6.56576	6.95774	6.38275	5.42101	5.0185	4.5544	3.90286
sp|Q15311|RBP1_HUMAN	RALBP1	RBP1_HUMAN RalA-binding protein 1	12	6.22485	5.5915	6.27879	6.26101	6.1719	6.26147	6.23087	5.95215	6.68399	6.42234	6.75716	6.31704	6.44626	5.85867	6.40766	6.13434
sp|Q8IX03-2|KIBRA_HUMAN	WWC1	KIBRA_HUMAN Isoform 2 of Protein KIBRA	8	5.88379	6.47065	5.86949	5.927	6.02702	5.8762	5.89297	6.03228	6.68118	6.17221	5.95281	6.18426	7.06864	6.58519	6.76181	6.6145
sp|P46937-9|YAP1_HUMAN	YAP1	YAP1_HUMAN Isoform 9 of Yorkie homolog	19	4.86649	5.39624	4.873	5.12782	5.62753	5.87646	5.21098	5.65328	5.77181	6.29755	5.9175	6.21906	7.55473	7.66507	8.38888	9.55359
sp|Q96QZ7-2|MAGI1_HUMAN	MAGI1	MAGI1_HUMAN Isoform 2 of Membrane-associated guanylate kinase, WW and PDZ domain-containing protein 1	21	5.69766	5.25248	5.67161	5.73175	5.90854	5.47228	5.27608	5.47117	5.91286	5.88891	5.74278	5.89723	7.41965	7.12009	8.48319	9.05372
sp|O43896|KIF1C_HUMAN	KIF1C	KIF1C_HUMAN Kinesin-like protein KIF1C	16	7.46311	6.85069	7.89004	7.35157	7.33815	6.38098	7.53505	6.74909	7.56469	6.20114	7.01718	5.95657	4.95676	4.44961	3.52789	2.76748
sp|O60333-2|KIF1B_HUMAN	KIF1B	KIF1B_HUMAN Isoform 2 of Kinesin-like protein KIF1B	47	5.4435	5.08025	5.69029	5.58082	6.23044	6.09779	5.95103	6.0396	6.83582	6.67668	6.45002	6.46834	7.24543	6.72078	7.11454	6.37467
sp|Q9NQT8|KI13B_HUMAN	KIF13B	KI13B_HUMAN Kinesin-like protein KIF13B	15	6.81133	6.79398	7.32944	6.89129	7.12819	6.43151	7.21562	6.5093	6.9376	6.68571	7.02763	6.35931	4.90003	4.88253	4.35492	3.74162
sp|Q9P2P6|STAR9_HUMAN	STARD9	STAR9_HUMAN StAR-related lipid transfer protein 9	7	6.22491	6.72364	5.59077	5.63409	5.77075	5.88581	5.8151	5.86687	6.07868	6.01722	5.84268	6.33804	6.966	6.49566	7.30913	7.44066
sp|O60333-3|KIF1B_HUMAN	KIF1B	KIF1B_HUMAN Isoform 3 of Kinesin-like protein KIF1B	1	7.97279	8.38459	9.70187	7.71071	6.03745	6.53783	6.86808	6.13638	5.97676	4.82382	5.09595	5.34661	5.15608	5.92817	4.37249	3.95043
sp|Q9H1H9|KI13A_HUMAN	KIF13A	KI13A_HUMAN Kinesin-like protein KIF13A	14	5.68369	5.42125	5.59037	5.473	6.22522	6.18231	5.98752	5.90091	6.63723	6.32032	6.2307	6.62224	7.0224	6.53909	7.26956	6.8942
sp|O95239|KIF4A_HUMAN	KIF4A	KIF4A_HUMAN Chromosome-associated kinesin KIF4A	42	8.77372	8.45505	8.72275	8.68681	6.85893	6.58082	7.25258	6.77219	6.04356	5.54517	6.06088	5.60016	3.44253	4.71071	3.38878	3.10536
sp|Q96L93-2|KI16B_HUMAN	KIF16B	KI16B_HUMAN Isoform 2 of Kinesin-like protein KIF16B	4	7.56192	8.79336	8.07222	7.52164	6.94517	6.51936	6.47487	6.33363	6.53746	6.23077	6.53683	6.13945	4.76984	5.09982	3.64065	2.82302
sp|Q9Y496|KIF3A_HUMAN	KIF3A	KIF3A_HUMAN Kinesin-like protein KIF3A	16	6.88636	7.0453	7.46469	6.94895	7.01422	6.66218	7.16058	6.86539	6.98608	6.67277	7.31312	6.34304	4.91162	4.76422	3.84521	3.11626
sp|Q9NWU5|RM22_HUMAN	MRPL22	RM22_HUMAN 39S ribosomal protein L22, mitochondrial	14	5.05176	4.91999	5.06752	5.313	5.62314	6.13929	5.42016	5.94542	5.87736	6.56691	6.2705	6.43294	7.2064	7.3847	8.02239	8.75851
sp|Q16254|E2F4_HUMAN	E2F4	E2F4_HUMAN Transcription factor E2F4	15	6.41411	6.56133	6.51763	6.55563	6.47406	6.53937	6.68843	6.55204	6.45304	6.41607	7.10405	6.7593	5.56325	5.09541	5.43333	4.87295
sp|Q99805|TM9S2_HUMAN	TM9SF2	TM9S2_HUMAN Transmembrane 9 superfamily member 2	25	6.20071	5.16885	6.2704	6.36349	6.49473	6.03051	6.20795	6.26766	6.73148	6.54171	6.43402	6.27019	6.62634	6.2239	6.2065	5.96155
sp|Q93084-5|AT2A3_HUMAN	ATP2A3	AT2A3_HUMAN Isoform SERCA3E of Sarcoplasmic/endoplasmic reticulum calcium ATPase 3	17	7.39027	6.80125	7.75042	7.8052	6.72865	6.68766	7.03866	6.79717	6.42807	6.37908	6.96727	6.21997	4.73959	5.04039	3.87764	3.34873
sp|P16615|AT2A2_HUMAN	ATP2A2	AT2A2_HUMAN Sarcoplasmic/endoplasmic reticulum calcium ATPase 2	66	7.93224	7.33565	7.887	7.97201	7.00905	6.6963	7.12322	6.85209	6.668	6.27081	6.417	6.15412	4.32948	4.65975	3.64287	3.0504
sp|Q13151|ROA0_HUMAN	HNRNPA0	ROA0_HUMAN Heterogeneous nuclear ribonucleoprotein A0	7	7.95416	7.13291	7.8766	7.57559	7.03353	6.5639	7.1857	6.58094	6.51184	5.7048	6.21326	5.88506	4.6229	5.08258	4.25437	3.82186
sp|P22626|ROA2_HUMAN	HNRNPA2B1	ROA2_HUMAN Heterogeneous nuclear ribonucleoproteins A2/B1	37	6.03301	5.99001	5.95752	6.03926	5.97306	5.58766	5.94961	5.68374	6.31758	5.95657	6.44964	6.04604	7.49661	6.50775	7.64648	6.36544
sp|P09651|ROA1_HUMAN	HNRNPA1	ROA1_HUMAN Heterogeneous nuclear ribonucleoprotein A1	43	6.10153	4.20298	6.31204	6.31847	6.1765	5.75669	6.05858	5.77587	6.30964	5.95954	6.30581	5.9983	7.05618	6.79362	7.68865	7.1856
sp|P09651-2|ROA1_HUMAN	HNRNPA1	ROA1_HUMAN Isoform A1-A of Heterogeneous nuclear ribonucleoprotein A1	2	6.05355	5.78463	6.44846	6.23625	6.30461	6.50775	5.98407	5.97478	6.2745	5.79502	6.67061	6.38424	6.81292	5.71436	6.28718	6.76707
sp|P51991|ROA3_HUMAN	HNRNPA3	ROA3_HUMAN Heterogeneous nuclear ribonucleoprotein A3	20	6.95244	7.23624	6.50594	6.32272	6.64243	6.09067	6.40236	5.97504	6.36919	5.86743	5.98112	5.64391	6.35092	5.84789	6.41651	5.39517
sp|P54886|P5CS_HUMAN	ALDH18A1	P5CS_HUMAN Delta-1-pyrroline-5-carboxylate synthase	49	7.84033	8.16645	7.87359	7.87022	7.12471	6.95446	7.07996	7.03753	6.6674	6.31214	6.61633	6.22009	3.99237	4.38227	3.17786	2.68429
sp|Q9BXP5|SRRT_HUMAN	SRRT	SRRT_HUMAN Serrate RNA effector molecule homolog	34	7.6134	8.14407	7.70497	7.74278	7.14201	6.73421	7.27027	6.73857	6.79879	6.16961	6.79941	6.24681	4.16044	4.47442	3.40268	2.85754
sp|Q9BRG1|VPS25_HUMAN	VPS25	VPS25_HUMAN Vacuolar protein-sorting-associated protein 25	7	7.30801	5.72412	7.16848	7.04948	7.50192	7.12503	7.52658	7.11098	7.11172	6.67811	7.25109	6.67942	5.01652	4.4201	3.30778	3.02065
sp|Q9ULD2|MTUS1_HUMAN	MTUS1	MTUS1_HUMAN Microtubule-associated tumor suppressor 1	14	7.81068	8.21289	7.80796	8.3184	6.23276	6.08831	6.0601	6.04044	6.01492	5.72357	6.08419	5.74513	4.88119	5.6867	4.63109	4.66168
sp|Q8ND24|RN214_HUMAN	RNF214	RN214_HUMAN RING finger protein 214	20	4.83619	4.9728	4.8904	5.08295	5.51696	5.86509	5.40625	5.57352	5.66235	6.35238	5.57675	5.98262	7.62217	7.97861	8.69288	9.98807
sp|Q8NBP0|TTC13_HUMAN	TTC13	TTC13_HUMAN Tetratricopeptide repeat protein 13	2	10.0077	9.92147	10.1259	9.96	7.68535	6.2201	5.6359	6.1659	5.57298	5.32586	5.89674	5.35643	3.14395	5.03345	2.43678	1.51154
sp|P33991|MCM4_HUMAN	MCM4	MCM4_HUMAN DNA replication licensing factor MCM4	42	7.77202	7.77754	7.82307	7.75172	7.3948	6.71931	7.58245	7.08294	6.79308	5.89178	7.09649	5.95983	4.141	4.26948	3.44672	2.49778
sp|Q9Y680|FKBP7_HUMAN	FKBP7	FKBP7_HUMAN Peptidyl-prolyl cis-trans isomerase FKBP7	9	5.13223	5.26483	4.86459	5.33918	5.47339	5.83707	5.21403	5.26265	5.71044	6.19286	5.59112	6.51553	7.63355	7.97818	8.4437	9.54663
sp|P24928|RPB1_HUMAN	POLR2A	RPB1_HUMAN DNA-directed RNA polymerase II subunit RPB1	52	8.11108	8.15403	8.23907	7.85132	7.02002	6.63979	7.28907	6.75821	6.48478	5.89573	6.59255	5.83031	4.17115	4.55062	3.55518	2.85708
sp|O94927|HAUS5_HUMAN	HAUS5	HAUS5_HUMAN HAUS augmin-like complex subunit 5	15	6.36518	6.21153	6.22172	6.36271	6.05901	6.06088	6.01999	6.39737	6.07044	5.99228	6.10865	6.4062	5.99439	6.44807	6.5093	6.77229
sp|Q49AN0|CRY2_HUMAN	CRY2	CRY2_HUMAN Cryptochrome-2	1	8.08304	5.7398	5.88839	6.61014	5.94683	5.36056	5.8858	3.54909	6.18718	6.32007	5.22794	7.76265	7.23306	6.12654	6.83185	7.24707
sp|Q9BVA0|KTNB1_HUMAN	KATNB1	KTNB1_HUMAN Katanin p80 WD40 repeat-containing subunit B1	11	6.89876	7.04483	7.20875	6.8118	6.66825	6.76786	7.0646	6.96958	6.69509	5.75935	6.56492	6.38747	5.12388	5.11834	4.52344	4.39309
sp|Q7Z3E2|CJ118_HUMAN	C10orf118	CJ118_HUMAN Uncharacterized protein C10orf118	13	5.43178	5.9051	5.57022	5.51264	5.4227	5.98073	5.43948	5.61092	6.01968	6.24119	5.88636	6.42563	6.86626	6.91803	7.63782	9.13146
sp|Q9H993|CF211_HUMAN	C6orf211	CF211_HUMAN UPF0364 protein C6orf211	15	7.74294	5.56234	7.97058	8.07146	7.14947	6.94436	7.40034	7.05269	6.71867	6.35584	7.00461	6.05937	4.48506	4.77747	3.58562	3.11918
sp|Q8N9N8|EIF1A_HUMAN	EIF1AD	EIF1A_HUMAN Probable RNA-binding protein EIF1AD	16	5.25247	6.27964	5.03715	5.48318	5.62068	5.67053	5.18993	5.60587	5.88415	5.99539	5.78061	6.06952	7.08684	7.64393	7.91126	9.48886
sp|Q8WW33|GTSF1_HUMAN	GTSF1	GTSF1_HUMAN Gametocyte-specific factor 1	11	5.14506	6.33056	5.12591	4.87987	5.80365	5.89799	5.68238	5.90744	5.38826	5.57482	5.71327	5.74575	7.51288	7.6359	8.13608	9.52018
sp|Q14203|DCTN1_HUMAN	DCTN1	DCTN1_HUMAN Dynactin subunit 1	43	7.22558	7.20914	7.50259	7.19569	7.02797	7.02157	7.75052	7.22617	6.69559	6.27724	7.2074	6.27769	4.16324	4.46407	3.69996	3.05559
sp|Q8N300|CCD23_HUMAN	CCDC23	CCD23_HUMAN Coiled-coil domain-containing protein 23	1	5.53237	3.27291	5.77245	6.11558	5.82275	5.91677	5.85714	5.97193	5.919	6.78872	6.58246	6.72361	7.01467	6.86381	7.62814	8.21768
sp|Q13200|PSMD2_HUMAN	PSMD2	PSMD2_HUMAN 26S proteasome non-ATPase regulatory subunit 2	74	7.16706	7.1577	7.09102	6.93948	7.14606	6.49074	7.18859	6.74109	7.1479	6.2027	6.88393	6.08531	5.26603	4.74746	4.3095	3.43545
sp|Q5VT06|CE350_HUMAN	CEP350	CE350_HUMAN Centrosome-associated protein 350	7	6.17308	5.99909	6.31765	6.4308	6.36421	6.15497	6.25074	6.16938	6.1212	6.40621	6.96774	6.76707	6.47908	5.70975	5.29071	6.39832
sp|Q24JP5-2|T132A_HUMAN	TMEM132A	T132A_HUMAN Isoform 2 of Transmembrane protein 132A	15	5.02247	5.12894	4.9397	5.0638	5.55896	6.11335	5.66066	5.72554	6.12976	6.43118	5.53842	6.40355	7.46251	7.50409	8.18701	9.13006
sp|Q12797|ASPH_HUMAN	ASPH	ASPH_HUMAN Aspartyl/asparaginyl beta-hydroxylase	39	6.92548	7.67412	6.81732	6.96722	6.30621	6.0694	6.29473	6.05263	6.01537	5.73401	6.04419	5.89949	5.75418	6.03453	5.98724	5.42385
tr|E5RHJ2|E5RHJ2_HUMAN	ASPH	E5RHJ2_HUMAN Aspartyl/asparaginyl beta-hydroxylase	1	6.00307	6.25263	6.40898	6.12328	5.96225	5.91673	5.55336	5.58678	6.23435	6.15177	6.36576	6.78799	6.71518	6.53803	6.90611	6.49373
sp|O43824|GTPB6_HUMAN	GTPBP6	GTPB6_HUMAN Putative GTP-binding protein 6	6	7.74395	8.62004	7.7705	8.11383	6.40269	6.00166	6.83663	6.19249	6.48114	5.43117	6.17916	5.78676	4.6939	4.86443	4.3543	4.52735
sp|P23246|SFPQ_HUMAN	SFPQ	SFPQ_HUMAN Splicing factor, proline- and glutamine-rich	28	9.55475	10.2766	8.97245	8.40351	5.19831	4.597	5.6678	4.72566	4.65709	3.86775	4.86578	4.16877	5.12401	6.34522	7.30626	6.26908
sp|Q13523|PRP4B_HUMAN	PRPF4B	PRP4B_HUMAN Serine/threonine-protein kinase PRP4 homolog	9	9.12763	10.0139	9.15009	8.88337	5.87344	6.09624	6.47938	5.73453	5.47609	5.0865	5.43502	5.32222	4.03333	5.71118	4.03516	3.54191
sp|P12830|CADH1_HUMAN	CDH1	CADH1_HUMAN Cadherin-1	21	4.83449	4.94139	4.75455	5.05594	5.49565	6.22688	5.55795	5.90817	5.71259	6.88748	6.20982	6.54985	7.2245	7.5085	8.21538	8.91684
sp|P22223|CADH3_HUMAN	CDH3	CADH3_HUMAN Cadherin-3	18	6.05252	6.21082	5.9882	6.00173	6.46658	6.43405	6.39755	6.36925	6.32869	6.36464	6.53735	6.37405	6.38365	6.07678	6.12715	5.88701
sp|Q8N511|TM199_HUMAN	TMEM199	TM199_HUMAN Transmembrane protein 199	2	5.68341	5.99308	6.42591	6.20194	6.56636	8.43608	8.50489	8.80008	6.12072	6.68892	8.72198	6.66401	3.42801	4.95739	3.29384	3.5134
sp|Q13472|TOP3A_HUMAN	TOP3A	TOP3A_HUMAN DNA topoisomerase 3-alpha	9	7.41093	7.15198	7.11192	7.25983	6.92573	6.52958	7.09002	6.49965	6.54101	6.08347	6.74011	6.23557	5.08951	5.19845	4.19618	3.93607
sp|Q9BW71|HIRP3_HUMAN	HIRIP3	HIRP3_HUMAN HIRA-interacting protein 3	13	5.89669	5.93001	5.74499	5.56949	5.95658	5.83873	5.73516	5.37714	6.22268	5.82631	5.71056	6.21691	6.88473	6.60912	8.0528	8.42812
sp|Q9Y3X0|CCDC9_HUMAN	CCDC9	CCDC9_HUMAN Coiled-coil domain-containing protein 9	4	5.66347	6.76459	5.45386	5.69297	5.40509	5.41692	5.20223	5.41034	5.71494	5.97748	4.99397	5.87213	7.25012	7.63933	8.51439	9.02816
sp|Q9Y4C1|KDM3A_HUMAN	KDM3A	KDM3A_HUMAN Lysine-specific demethylase 3A	12	6.32197	5.5546	6.80447	6.80091	6.67034	6.28876	6.41846	6.48655	6.7495	6.68006	6.43169	6.48461	5.68382	6.0396	5.37513	5.20951
sp|Q15652|JHD2C_HUMAN	JMJD1C	JHD2C_HUMAN Probable JmjC domain-containing histone demethylation protein 2C	20	7.11869	7.1951	7.38285	7.50925	6.63493	6.59424	6.75875	6.38107	6.11069	6.25267	6.6364	6.16269	4.89961	5.46424	4.6983	4.20053
sp|Q7LBC6|KDM3B_HUMAN	KDM3B	KDM3B_HUMAN Lysine-specific demethylase 3B	49	6.41409	6.32351	6.45862	6.34128	6.77922	6.38289	6.56099	6.3772	6.915	6.50025	6.85984	6.52658	6.34088	5.306	5.49032	4.42332
sp|Q2YD98|UVSSA_HUMAN	UVSSA	UVSSA_HUMAN UV-stimulated scaffold protein A	1	5.24714	5.11388	4.06301	4.29725	4.63949	6.52909	5.09095	5.24692	6.29332	6.58021	4.74886	5.51399	9.59884	7.59022	9.23556	10.2113
sp|Q16204|CCDC6_HUMAN	CCDC6	CCDC6_HUMAN Coiled-coil domain-containing protein 6	29	5.51657	5.71967	5.1685	5.20178	5.6714	5.36125	5.1616	5.22828	5.88853	5.73721	5.53816	6.01261	7.84896	7.30824	9.18428	9.45297
sp|Q96QU8|XPO6_HUMAN	XPO6	XPO6_HUMAN Exportin-6	14	8.52756	8.42555	8.15902	8.26037	6.7167	6.26117	7.13598	6.62631	6.68905	6.01964	6.40841	6.18143	3.98972	4.56447	3.31034	2.72427
sp|Q9BTC0|DIDO1_HUMAN	DIDO1	DIDO1_HUMAN Death-inducer obliterator 1	31	7.26922	7.11724	7.1123	7.08073	6.08333	6.05474	6.05338	5.89981	6.18103	5.76967	6.06057	5.81767	5.7586	6.11048	6.13312	5.4981
sp|Q92576|PHF3_HUMAN	PHF3	PHF3_HUMAN PHD finger protein 3	17	6.76364	7.29142	7.13337	7.04296	5.99887	5.77699	6.08144	5.98175	5.79414	5.72231	5.92157	5.82282	5.6413	6.67386	6.38734	5.96623
sp|Q01082|SPTB2_HUMAN	SPTBN1	SPTB2_HUMAN Spectrin beta chain, non-erythrocytic 1	111	6.2612	6.19294	6.14536	6.09582	5.76428	5.92484	5.7457	5.77967	5.72272	5.94305	5.75219	5.96265	6.73943	6.85535	7.57217	7.54262
sp|P11277-2|SPTB1_HUMAN	SPTB	SPTB1_HUMAN Isoform 2 of Spectrin beta chain, erythrocytic	4	7.83769	6.81726	5.8237	7.83893	5.62936	3.47777	3.41973	3.59874	6.55294	3.89012	3.62869	5.21521	8.51509	7.99311	8.82356	10.9381
sp|P12814|ACTN1_HUMAN	ACTN1	ACTN1_HUMAN Alpha-actinin-1	88	4.78218	4.86925	4.79118	4.98573	5.58204	6.07582	5.51855	5.91041	5.67414	6.24425	5.80562	6.29423	7.43985	7.85878	8.5272	9.64079
sp|O43707|ACTN4_HUMAN	ACTN4	ACTN4_HUMAN Alpha-actinin-4	192	4.90302	5.19952	4.7291	4.97191	5.42524	5.85582	5.12304	5.75432	5.57864	6.29735	5.41453	6.25919	7.67918	7.93516	8.68984	10.1841
tr|H9KV75|H9KV75_HUMAN	ACTN1	H9KV75_HUMAN Alpha-actinin-1	4	5.6206	5.19357	5.76527	5.04212	6.00628	5.72211	5.38787	5.97335	5.99864	6.57582	5.60599	5.75941	6.76083	7.08768	9.0695	8.43093
sp|O15020|SPTN2_HUMAN	SPTBN2	SPTN2_HUMAN Spectrin beta chain, non-erythrocytic 2	14	6.5257	6.90577	6.3789	6.15525	5.73047	5.98635	5.82263	5.77771	5.9392	6.08934	5.86182	6.53764	6.4213	6.39891	6.64801	6.821
sp|Q9BYT8|NEUL_HUMAN	NLN	NEUL_HUMAN Neurolysin, mitochondrial	42	5.30281	4.96377	5.45579	5.36219	6.20307	6.18654	5.98537	6.04865	6.25361	6.51573	6.46322	6.16201	7.46992	7.06795	7.59256	6.96682
sp|Q96GZ6-5|S41A3_HUMAN	SLC41A3	S41A3_HUMAN Isoform 5 of Solute carrier family 41 member 3	2	6.3075	5.45786	8.15667	6.76315	6.25753	5.93363	5.72889	6.23879	6.15403	6.79411	6.39112	5.97766	5.81216	5.70658	6.06218	6.25812
sp|Q9NR19-2|ACSA_HUMAN	ACSS2	ACSA_HUMAN Isoform 2 of Acetyl-coenzyme A synthetase, cytoplasmic	7	7.43579	7.89173	7.49955	7.50179	7.17974	6.77576	7.20216	6.82344	6.94252	6.16399	6.85566	6.0835	4.34406	4.37484	3.92386	3.00161
sp|Q9UQE7|SMC3_HUMAN	SMC3	SMC3_HUMAN Structural maintenance of chromosomes protein 3	44	8.27695	8.00761	8.42588	8.58586	6.86217	6.51841	6.87049	6.50269	6.1728	5.80563	6.18458	6.03334	3.71223	4.80897	3.93659	3.29581
sp|Q8N1B4|VPS52_HUMAN	VPS52	VPS52_HUMAN Vacuolar protein sorting-associated protein 52 homolog	10	8.84156	7.04817	9.24208	9.96515	6.65654	6.71808	7.27699	7.13266	5.7247	5.75243	6.4448	5.77182	3.5323	4.72779	2.81239	2.35254
sp|Q9HB71|CYBP_HUMAN	CACYBP	CYBP_HUMAN Calcyclin-binding protein	48	5.25243	4.92542	5.13877	5.20839	5.90378	5.89691	5.67734	5.87641	6.31478	6.57813	5.93522	6.2239	8.128	7.32389	7.8569	7.75974
sp|Q7L7V1|DHX32_HUMAN	DHX32	DHX32_HUMAN Putative pre-mRNA-splicing factor ATP-dependent RNA helicase DHX32	12	7.73824	7.54293	7.94172	8.02349	6.52262	6.83742	7.18845	6.62161	6.76095	5.94519	6.83336	5.98145	4.2793	4.74057	3.65867	3.38403
sp|O75113|N4BP1_HUMAN	N4BP1	N4BP1_HUMAN NEDD4-binding protein 1	13	5.94918	6.16907	5.90674	5.99475	6.53983	6.65797	6.39871	6.37629	6.63949	6.82904	6.75418	6.34543	6.52212	5.63736	5.88492	5.39493
sp|Q6NWY9|PR40B_HUMAN	PRPF40B	PR40B_HUMAN Pre-mRNA-processing factor 40 homolog B	2	8.2074	8.27562	8.53768	8.28058	6.339	6.87571	7.15506	7.05655	6.27006	5.13574	6.03119	5.97335	3.89124	4.49631	3.52577	3.94875
sp|O75400|PR40A_HUMAN	PRPF40A	PR40A_HUMAN Pre-mRNA-processing factor 40 homolog A	23	8.79244	9.47674	9.16002	9.16467	5.89754	5.71194	6.35329	5.95985	5.4405	5.10663	5.90372	5.49416	4.01244	5.43687	4.2285	3.86067
sp|O75400-3|PR40A_HUMAN	PRPF40A	PR40A_HUMAN Isoform 3 of Pre-mRNA-processing factor 40 homolog A	4	6.12463	7.1314	6.69792	6.76456	5.77073	8.41444	8.08855	6.98859	5.16767	6.41538	6.93812	6.36735	4.52368	4.97449	4.26303	5.36945
sp|Q12981|SEC20_HUMAN	BNIP1	SEC20_HUMAN Vesicle transport protein SEC20	11	6.58882	6.7263	6.23742	6.11446	6.09951	6.04295	6.14699	5.9987	6.28396	6.09919	6.22065	6.29114	6.18468	6.02889	6.19446	6.74187
sp|Q86US8|EST1A_HUMAN	SMG6	EST1A_HUMAN Telomerase-binding protein EST1A	5	8.68761	9.19366	8.77122	8.50028	6.37839	5.71852	6.60324	6.29537	5.73393	5.34498	5.66929	5.41167	3.97063	5.65212	4.19562	3.87347
sp|P23919|KTHY_HUMAN	DTYMK	KTHY_HUMAN Thymidylate kinase	29	5.97184	6.90266	5.92071	6.00129	6.38513	6.62231	6.28046	6.62462	6.76098	6.94792	6.14618	6.78657	5.54212	6.16674	5.08565	5.85483
sp|P23396|RS3_HUMAN	RPS3	RS3_HUMAN 40S ribosomal protein S3	91	6.39365	6.7345	6.03263	6.20098	5.82824	5.68809	5.85918	5.69488	5.82074	5.62532	5.75055	5.89736	6.35945	6.48095	7.67788	7.95561
sp|O95235|KI20A_HUMAN	KIF20A	KI20A_HUMAN Kinesin-like protein KIF20A	5	8.11333	8.95836	8.0301	8.25478	7.10528	6.66596	7.02851	7.02203	6.49397	5.6487	6.15854	5.76956	3.89723	4.80983	3.17083	2.87299
sp|Q8TDY2|RBCC1_HUMAN	RB1CC1	RBCC1_HUMAN RB1-inducible coiled-coil protein 1	19	6.21273	6.27705	6.37865	6.35079	6.52534	6.68836	6.59244	6.60455	6.31287	6.46236	6.60599	6.32629	5.76668	5.76651	5.62842	5.50098
sp|P19474|RO52_HUMAN	TRIM21	RO52_HUMAN E3 ubiquitin-protein ligase TRIM21	4	6.90338	7.72186	7.43115	6.71491	7.15535	6.27582	7.16576	6.6058	7.23524	6.46599	7.31605	6.77173	4.79404	4.49457	3.93192	3.01641
sp|Q7Z3U7|MON2_HUMAN	MON2	MON2_HUMAN Protein MON2 homolog	24	7.41625	7.44535	7.57064	7.78478	6.62065	6.66014	6.93502	6.81519	6.25916	6.22217	6.46148	6.1515	4.46296	5.11354	4.11674	3.96444
sp|P42566|EPS15_HUMAN	EPS15	EPS15_HUMAN Epidermal growth factor receptor substrate 15	47	4.97799	5.57691	4.92103	5.07866	5.54725	6.11336	5.59366	5.81788	5.6916	6.15818	6.31776	6.05008	7.3251	7.29681	8.51084	9.02289
sp|Q04726-5|TLE3_HUMAN	TLE3	TLE3_HUMAN Isoform 5 of Transducin-like enhancer protein 3	13	4.89017	4.83618	4.91839	5.04283	5.82903	5.93599	5.69837	5.88423	5.93033	6.5011	6.25402	6.55025	7.51957	7.57793	8.13971	8.49188
sp|Q04724|TLE1_HUMAN	TLE1	TLE1_HUMAN Transducin-like enhancer protein 1	10	5.3554	5.51708	5.33641	5.34296	5.79002	6.11437	5.69373	5.95783	6.1545	6.66766	6.06388	6.36881	7.33793	7.14886	7.39905	7.75152
sp|Q04725|TLE2_HUMAN	TLE2	TLE2_HUMAN Transducin-like enhancer protein 2	1	5.33076	6.79453	5.81785	6.0576	5.5294	5.6174	6.07649	6.52905	6.18442	5.76595	5.34333	6.42033	7.35569	6.75152	6.85185	7.57385
sp|Q9Y4B6|VPRBP_HUMAN	VPRBP	VPRBP_HUMAN Protein VPRBP	35	8.2779	8.20015	8.5097	8.18043	6.78835	6.50365	7.16677	6.70459	6.33881	5.93442	6.26623	6.04697	4.14258	4.5659	3.37945	2.99409
sp|Q8WZ82|OVCA2_HUMAN	OVCA2	OVCA2_HUMAN Ovarian cancer-associated gene 2 protein	5	6.52918	5.3973	6.54286	6.42012	7.59261	7.18864	8.0754	7.44064	7.07481	6.91737	8.26418	6.47415	4.79244	4.12725	3.52958	3.63347
sp|Q9H008|LHPP_HUMAN	LHPP	LHPP_HUMAN Phospholysine phosphohistidine inorganic pyrophosphate phosphatase	9	5.15568	4.94687	4.73478	5.22054	5.67863	6.26167	5.75248	5.85521	5.86542	6.8362	5.89661	6.23466	7.55834	7.51545	7.57497	8.91248
sp|Q16890|TPD53_HUMAN	TPD52L1	TPD53_HUMAN Tumor protein D53	8	5.58122	5.71611	5.6532	5.04158	6.51805	6.66225	6.28929	6.26672	6.20638	5.93455	6.13574	6.889	6.27738	5.8021	6.79189	8.23454
sp|Q9BVI4|NOC4L_HUMAN	NOC4L	NOC4L_HUMAN Nucleolar complex protein 4 homolog	13	9.5526	8.78793	9.75706	9.66671	6.84088	6.63337	7.44543	6.73382	5.67817	5.13653	5.98303	5.4553	2.83018	4.58401	2.63793	2.27704
sp|P04424|ARLY_HUMAN	ASL	ARLY_HUMAN Argininosuccinate lyase	26	5.05641	5.07083	5.07092	5.24879	5.75884	5.90735	5.59252	5.83374	6.07588	6.50977	5.87344	6.25618	7.77365	7.40916	8.24302	8.3195
sp|O75575|RPC9_HUMAN	CRCP	RPC9_HUMAN DNA-directed RNA polymerase III subunit RPC9	3	4.7674	5.7572	5.04176	5.17655	5.35602	5.91044	5.7257	6.14109	5.34264	5.96104	5.55923	6.48723	7.57482	7.93754	8.45401	8.80736
sp|Q5T013|HYI_HUMAN	HYI	HYI_HUMAN Putative hydroxypyruvate isomerase	4	4.80402	5.13847	5.11615	5.16052	5.32582	5.99112	5.63836	5.87273	5.82342	6.50974	5.9644	6.23755	7.59352	7.86684	7.35076	9.60658
sp|Q9HB40|RISC_HUMAN	SCPEP1	RISC_HUMAN Retinoid-inducible serine carboxypeptidase	18	6.45927	6.31271	6.43513	6.26654	6.69775	6.79292	6.96077	6.59568	6.56589	6.22227	6.98434	6.27136	5.76564	5.52974	5.38908	4.75091
sp|Q9HBR0|S38AA_HUMAN	SLC38A10	S38AA_HUMAN Putative sodium-coupled neutral amino acid transporter 10	16	6.91185	6.8172	7.29589	7.07741	6.47585	6.50789	6.44654	6.68446	6.77416	6.40254	6.47971	6.16763	5.26986	5.31945	4.86259	4.50696
sp|P61601|NCALD_HUMAN	NCALD	NCALD_HUMAN Neurocalcin-delta	12	5.21294	5.46711	4.93584	5.07772	5.42789	5.89769	5.29966	5.43049	5.60845	6.35916	5.95633	6.25655	7.24727	7.75095	8.57918	9.49279
sp|P37235|HPCL1_HUMAN	HPCAL1	HPCL1_HUMAN Hippocalcin-like protein 1	10	4.83885	5.14688	5.12965	4.91353	5.6843	5.75347	5.25871	5.68475	5.90387	6.06907	5.38023	6.02005	7.70905	7.71666	8.88942	9.9015
sp|P16422|EPCAM_HUMAN	EPCAM	EPCAM_HUMAN Epithelial cell adhesion molecule	19	5.40284	4.54486	5.15328	5.11456	6.33899	6.33999	6.11845	6.3494	6.23382	6.49576	6.30434	6.44849	7.19283	7.01339	7.32744	7.62156
sp|Q13546|RIPK1_HUMAN	RIPK1	RIPK1_HUMAN Receptor-interacting serine/threonine-protein kinase 1	13	6.44552	6.08627	6.70703	6.3924	6.93545	6.78077	7.14282	6.64047	7.20318	6.60087	6.9337	6.32482	5.62195	5.16241	4.86233	4.16001
sp|Q9Y5Z4|HEBP2_HUMAN	HEBP2	HEBP2_HUMAN Heme-binding protein 2	12	4.76319	4.72673	4.50947	5.01412	5.48679	5.84046	5.11134	5.86667	5.54557	6.24156	5.41518	6.30264	7.68394	8.6874	8.89972	9.90522
sp|P51532|SMCA4_HUMAN	SMARCA4	SMCA4_HUMAN Transcription activator BRG1	40	7.93991	7.91468	7.86281	7.83179	6.95855	6.20593	6.85403	6.47647	6.41986	5.73556	6.24492	5.78841	4.69515	4.89039	4.31598	3.86557
sp|P51531|SMCA2_HUMAN	SMARCA2	SMCA2_HUMAN Probable global transcription activator SNF2L2	5	6.58426	7.63031	7.25457	7.09999	6.70187	6.27492	6.81339	6.75042	6.25336	5.64633	6.55074	6.43582	5.55265	5.37964	4.59112	4.48061
sp|Q9H7D7|WDR26_HUMAN	WDR26	WDR26_HUMAN WD repeat-containing protein 26	33	5.85284	5.72989	5.80237	5.96024	6.27462	6.31301	6.22153	6.19234	6.72716	6.82778	6.45778	6.6615	6.77365	6.04957	6.33043	5.8253
sp|P59998-3|ARPC4_HUMAN	ARPC4	ARPC4_HUMAN Isoform 3 of Actin-related protein 2/3 complex subunit 4	30	5.01503	4.9321	5.06478	5.10764	5.45515	5.77433	5.4072	5.72014	6.06186	6.51961	5.78702	6.40506	7.97761	7.61686	8.14749	9.00811
sp|Q9UHD2|TBK1_HUMAN	TBK1	TBK1_HUMAN Serine/threonine-protein kinase TBK1	29	7.00489	6.66203	7.09019	6.66335	6.83936	6.40381	6.90473	6.54761	6.89774	6.21246	6.68442	6.28146	6.00524	4.91737	5.03115	3.85419
sp|O15066|KIF3B_HUMAN	KIF3B	KIF3B_HUMAN Kinesin-like protein KIF3B	11	7.12228	7.46871	7.3938	7.27814	7.08106	6.62078	7.10413	6.72446	7.56566	6.60705	6.95193	6.69687	4.90453	4.40972	3.45764	2.61323
sp|Q9Y2G5|OFUT2_HUMAN	POFUT2	OFUT2_HUMAN GDP-fucose protein O-fucosyltransferase 2	7	6.82492	6.90963	6.807	6.57141	7.24659	5.95711	6.92966	6.60984	7.56195	6.56897	6.91264	6.60442	5.92793	5.06224	4.19685	3.30887
sp|Q7KZI7|MARK2_HUMAN	MARK2	MARK2_HUMAN Serine/threonine-protein kinase MARK2	15	9.61479	9.642	9.70357	9.65159	6.33358	5.65298	6.69263	6.48067	5.55383	5.10969	5.44212	5.20441	3.40866	5.51648	3.17785	2.81513
sp|P27448-7|MARK3_HUMAN	MARK3	MARK3_HUMAN Isoform 6 of MAP/microtubule affinity-regulating kinase 3	3	7.12008	7.03645	8.31988	8.69525	5.93353	6.34454	6.73477	6.70897	5.81423	5.57472	5.88336	5.89793	4.43782	6.12308	4.53719	4.83821
sp|Q71F56|MD13L_HUMAN	MED13L	MD13L_HUMAN Mediator of RNA polymerase II transcription subunit 13-like	12	6.97978	6.30715	7.33316	7.04294	6.99737	6.51072	6.64537	6.69924	6.69485	6.08457	7.31642	6.74936	5.95877	5.31254	3.94561	3.42215
sp|O94992|HEXI1_HUMAN	HEXIM1	HEXI1_HUMAN Protein HEXIM1	13	5.07491	5.62828	4.78256	4.8925	5.52179	5.71849	5.21498	5.58082	5.65695	6.06102	5.6175	6.30543	7.52265	7.68414	8.75187	9.98609
sp|Q96MH2|HEXI2_HUMAN	HEXIM2	HEXI2_HUMAN Protein HEXIM2	4	5.26366	5.40691	4.8946	4.89298	5.36651	5.37986	5.13514	5.61853	6.13304	5.8842	5.51363	6.14048	7.20875	7.61962	9.55782	9.98429
sp|Q643R3|LPCT4_HUMAN	LPCAT4	LPCT4_HUMAN Lysophospholipid acyltransferase LPCAT4	10	7.2815	6.22696	7.29676	7.42326	6.76451	6.85261	6.80441	6.53864	6.44301	6.14637	6.79528	6.39275	4.86477	5.21297	4.65591	4.30029
sp|Q9H649|NSUN3_HUMAN	NSUN3	NSUN3_HUMAN Putative methyltransferase NSUN3	1	6.92085	8.86353	7.78539	7.4156	6.20136	6.10722	6.533	6.28232	6.35054	5.61856	6.09348	6.26531	4.71398	5.54594	4.58834	4.71457
sp|P51572-2|BAP31_HUMAN	BCAP31	BAP31_HUMAN Isoform 2 of B-cell receptor-associated protein 31	27	4.87179	5.14194	4.92862	4.77893	5.7396	6.54651	6.17205	6.36582	6.0311	6.61964	6.53776	6.53506	7.41082	6.91485	7.60786	7.79763
sp|Q9NXR1|NDE1_HUMAN	NDE1	NDE1_HUMAN Nuclear distribution protein nudE homolog 1	9	5.65912	6.02463	5.74962	5.66308	5.54727	5.87283	5.51468	5.72946	5.69187	6.04723	5.828	6.10237	7.15378	7.06119	8.23857	8.11629
sp|Q9GZM8|NDEL1_HUMAN	NDEL1	NDEL1_HUMAN Nuclear distribution protein nudE-like 1	3	6.51487	7.7303	6.29567	6.2037	5.7079	6.19035	5.73336	6.06143	5.49428	5.4502	5.84789	5.94619	6.0315	6.46192	6.76759	7.56285
sp|P30519|HMOX2_HUMAN	HMOX2	HMOX2_HUMAN Heme oxygenase 2	38	5.22573	5.57539	5.38503	5.10741	6.29017	6.22176	6.08094	6.14916	6.63064	6.60115	6.4039	6.6058	7.41764	6.7046	6.94225	6.65842
sp|P48634|PRC2A_HUMAN	PRRC2A	PRC2A_HUMAN Protein PRRC2A	34	5.87743	6.2413	5.93479	5.86751	5.88247	6.11954	5.94743	5.84374	6.1999	6.02682	6.2376	6.30854	6.61788	6.59096	7.18685	7.11725
sp|Q9Y520-7|PRC2C_HUMAN	PRRC2C	PRC2C_HUMAN Isoform 7 of Protein PRRC2C	75	5.91366	6.19426	5.88069	5.90126	5.8199	5.97143	5.79137	5.79033	5.7835	5.93628	5.8816	6.06535	6.61496	6.79748	7.60573	8.0522
sp|Q5JSZ5|PRC2B_HUMAN	PRRC2B	PRC2B_HUMAN Protein PRRC2B	17	6.6427	6.49981	6.37659	6.78668	6.37525	6.19906	6.42495	6.09697	6.1893	6.03909	6.36744	6.0451	5.88185	5.78493	6.20924	6.08105
sp|P14649|MYL6B_HUMAN	MYL6B	MYL6B_HUMAN Myosin light chain 6B	22	5.36623	5.70271	5.29629	5.47645	5.69812	5.78363	5.5588	5.66802	5.87174	6.44958	5.8952	6.452	7.21101	7.1162	7.62103	8.833
sp|P60660-2|MYL6_HUMAN	MYL6	MYL6_HUMAN Isoform Smooth muscle of Myosin light polypeptide 6	31	5.26101	5.45379	5.05769	5.17749	5.653	5.81735	5.43871	5.70794	5.82075	6.21237	5.77506	6.36714	7.51173	7.45914	7.54524	9.74161
sp|P60660|MYL6_HUMAN	MYL6	MYL6_HUMAN Myosin light polypeptide 6	3	6.17693	4.53792	6.32794	6.95505	6.51925	5.41227	5.94404	5.17737	6.65228	5.09681	5.86993	6.06816	7.10501	6.27529	7.43065	8.45108
tr|G3V1V0|G3V1V0_HUMAN	MYL6	G3V1V0_HUMAN Myosin light polypeptide 6	10	4.81461	4.66035	4.80871	5.68369	5.21361	5.49063	5.40328	5.28535	5.58406	7.30722	5.98343	6.5978	7.56067	7.69216	7.6778	10.2366
sp|P41252|SYIC_HUMAN	IARS	SYIC_HUMAN Isoleucine--tRNA ligase, cytoplasmic	88	8.65711	8.74128	8.55051	8.44661	7.09042	6.45226	7.21936	6.77019	6.5254	5.84528	6.31982	5.87405	3.72997	4.31227	2.98741	2.47806
sp|P61158|ARP3_HUMAN	ACTR3	ARP3_HUMAN Actin-related protein 3	48	5.17706	5.31742	5.00168	5.25468	5.4078	5.52986	5.1219	5.53499	6.02407	6.15157	5.62472	6.19564	8.00162	7.7333	8.79563	9.12807
sp|Q9P1U1|ARP3B_HUMAN	ACTR3B	ARP3B_HUMAN Actin-related protein 3B	11	5.10826	6.1795	5.24028	5.1039	5.61327	6.01133	5.67047	5.85135	6.04796	6.5792	6.02555	6.47883	6.93934	7.15832	7.76834	8.22412
sp|P55884-2|EIF3B_HUMAN	EIF3B	EIF3B_HUMAN Isoform 2 of Eukaryotic translation initiation factor 3 subunit B	71	9.29461	9.21013	8.95311	8.96194	7.03079	6.1676	7.33625	6.5177	6.04793	5.2122	6.06523	5.28821	3.55806	4.53156	3.223	2.60168
tr|C9JQN7|C9JQN7_HUMAN	EIF3B	C9JQN7_HUMAN Eukaryotic translation initiation factor 3 subunit B (Fragment)	3	6.5167	8.06439	7.23864	7.3982	7.17532	7.24041	7.11362	6.07175	5.97773	5.62936	6.11868	5.75064	5.06916	6.39801	4.15706	4.08033
sp|O95777|NAA38_HUMAN	NAA38	NAA38_HUMAN N-alpha-acetyltransferase 38, NatC auxiliary subunit	14	5.25321	4.85058	5.14195	5.18336	5.94539	6.00093	5.60231	5.63672	6.0398	6.36949	6.07569	6.35353	7.03873	7.1492	8.08012	9.27898
sp|Q9P206-2|K1522_HUMAN	KIAA1522	K1522_HUMAN Isoform 2 of Uncharacterized protein KIAA1522	8	6.62795	7.0829	6.81053	6.99978	5.92837	5.57068	5.76752	5.79867	5.62278	5.57001	6.07921	6.14641	6.31337	6.3192	6.41865	6.94396
sp|Q9UHD1|CHRD1_HUMAN	CHORDC1	CHRD1_HUMAN Cysteine and histidine-rich domain-containing protein 1	50	5.23732	4.46083	5.26222	5.34561	5.95569	5.83557	5.81529	5.96863	6.26815	6.73392	6.24734	6.23358	7.82298	7.37632	7.94534	7.49121
sp|Q92733|PRCC_HUMAN	PRCC	PRCC_HUMAN Proline-rich protein PRCC	11	4.90482	5.43111	4.85867	5.15443	5.61785	6.12817	5.54491	5.85555	5.5862	6.25566	6.09205	6.33764	7.41801	7.25448	8.37251	9.18795
sp|Q12906-7|ILF3_HUMAN	ILF3	ILF3_HUMAN Isoform 7 of Interleukin enhancer-binding factor 3	63	5.72927	5.77119	5.63977	5.78864	5.81817	5.9308	5.80509	5.80549	6.00858	6.07468	6.0308	6.18618	6.78795	6.84468	7.70569	8.07303
sp|Q12906|ILF3_HUMAN	ILF3	ILF3_HUMAN Interleukin enhancer-binding factor 3	1	4.70899	4.36674	5.7537	5.79804	6.36149	7.82948	6.92738	5.83014	4.91723	7.20088	6.92048	5.86459	9.34394	7.3274	5.9712	4.87832
sp|Q96SI9|STRBP_HUMAN	STRBP	STRBP_HUMAN Spermatid perinuclear RNA-binding protein	18	7.16011	6.12143	7.22826	7.12197	6.25667	5.92434	6.51731	6.20382	6.11928	5.96416	6.33108	5.79732	5.86888	6.1096	5.77148	5.50429
sp|P63244|GBLP_HUMAN	GNB2L1	GBLP_HUMAN Guanine nucleotide-binding protein subunit beta-2-like 1	84	6.40265	6.50107	6.18165	6.19848	5.85735	6.07089	6.13396	5.89356	5.83765	5.81041	6.17956	5.74706	6.14424	6.43607	7.28584	7.31958
tr|D6RF23|D6RF23_HUMAN	GNB2L1	D6RF23_HUMAN Guanine nucleotide-binding protein subunit beta-2-like 1	3	6.92841	8.45338	6.5987	6.58242	5.28571	3.89164	3.70571	3.74525	7.26506	5.20768	3.72635	5.7173	7.60549	7.41732	8.44172	9.42784
tr|D6RHH4|D6RHH4_HUMAN	GNB2L1	D6RHH4_HUMAN Guanine nucleotide-binding protein subunit beta-2-like 1	1	6.52522	7.31917	6.7118	7.49014	5.37703	3.5526	4.54782	5.07562	6.00315	5.14328	3.34784	5.2257	7.53074	11.4122	7.8736	6.86413
sp|Q9H8H0|NOL11_HUMAN	NOL11	NOL11_HUMAN Nucleolar protein 11	14	8.43711	7.86541	8.18671	8.47655	6.55294	6.59083	7.02433	6.56635	6.08488	6.19232	6.23812	5.69451	3.98273	4.9357	3.79004	3.38147
sp|Q9UKJ3|GPTC8_HUMAN	GPATCH8	GPTC8_HUMAN G patch domain-containing protein 8	8	9.3293	9.08952	9.47371	9.02569	6.00876	5.40061	6.28764	5.53794	5.48472	5.164	5.06603	5.28142	4.38488	5.57512	4.61667	4.274
sp|P36957|ODO2_HUMAN	DLST	ODO2_HUMAN Dihydrolipoyllysine-residue succinyltransferase component of 2-oxoglutarate dehydrogenase complex, mitochondrial	29	5.08227	4.08666	4.75904	5.41896	5.3753	5.8326	4.99316	5.76533	5.35756	6.22037	5.82617	6.21147	7.51527	8.24166	8.8511	10.4631
sp|Q10570|CPSF1_HUMAN	CPSF1	CPSF1_HUMAN Cleavage and polyadenylation specificity factor subunit 1	20	8.33756	7.9452	8.24791	8.43918	6.71363	6.57306	6.92365	6.78502	6.24298	5.95502	6.63796	6.09788	4.07014	4.55734	3.55005	2.92341
sp|O75448|MED24_HUMAN	MED24	MED24_HUMAN Mediator of RNA polymerase II transcription subunit 24	23	7.90395	7.30855	7.95354	7.73343	7.03315	6.69997	7.14006	6.7926	6.596	6.12345	6.63971	6.16469	4.2512	4.84239	3.72645	3.09086
sp|P09874|PARP1_HUMAN	PARP1	PARP1_HUMAN Poly [ADP-ribose] polymerase 1	99	9.66971	9.46727	9.47126	9.43707	6.65694	5.99989	6.86082	6.34908	5.62125	4.98023	5.71931	5.11808	3.64145	5.05769	3.34744	2.60253
sp|Q8NC56|LEMD2_HUMAN	LEMD2	LEMD2_HUMAN LEM domain-containing protein 2	8	7.67332	7.7447	7.87871	7.38913	7.15975	6.1964	6.98817	6.31753	6.58928	5.65895	6.09222	5.82431	4.80541	5.34078	4.28435	4.05698
sp|Q9BUJ2|HNRL1_HUMAN	HNRNPUL1	HNRL1_HUMAN Heterogeneous nuclear ribonucleoprotein U-like protein 1	28	6.08111	5.9419	6.22347	6.26467	6.44891	5.92274	6.19895	5.86902	6.5983	6.14387	6.5598	5.98556	7.00229	6.27301	6.52365	5.96276
tr|M0R247|M0R247_HUMAN	HNRNPUL1	M0R247_HUMAN Heterogeneous nuclear ribonucleoprotein U-like protein 1	1	5.09103	6.77314	4.58254	5.98976	7.49427	5.43821	5.59425	3.46912	5.25555	5.16219	3.47487	5.08787	9.96077	7.55649	9.13856	9.93138
sp|Q86U44|MTA70_HUMAN	METTL3	MTA70_HUMAN N6-adenosine-methyltransferase 70 kDa subunit	32	5.34904	5.11736	5.36351	5.42692	5.76677	6.10944	5.65008	5.88869	6.06268	6.31021	6.06332	6.34284	7.1713	7.09957	7.88852	8.38975
sp|Q96DV4|RM38_HUMAN	MRPL38	RM38_HUMAN 39S ribosomal protein L38, mitochondrial	20	5.36469	5.41747	5.23767	5.44797	5.48741	5.9267	5.36866	5.75702	5.73535	6.315	6.03391	6.49893	7.35393	7.36388	8.03449	8.65694
sp|Q9UJZ1|STML2_HUMAN	STOML2	STML2_HUMAN Stomatin-like protein 2, mitochondrial	20	5.49477	5.32463	5.58358	5.59012	6.58724	6.18	6.15707	6.40131	6.53739	6.72122	6.46568	6.98591	7.02837	6.52926	6.48612	5.92734
sp|Q07157|ZO1_HUMAN	TJP1	ZO1_HUMAN Tight junction protein ZO-1	53	6.64004	6.0147	6.45602	6.44312	6.1851	5.55357	5.99091	5.51853	6.04646	5.34599	5.99742	5.6134	6.79138	6.0387	8.12282	7.24184
tr|G5E9E7|G5E9E7_HUMAN	TJP1	G5E9E7_HUMAN Tight junction protein 1 (Zona occludens 1), isoform CRA_e	3	5.93129	4.95712	5.98622	6.81374	6.72882	6.34164	6.43681	5.79277	6.05127	5.36772	7.13353	4.95085	6.05693	6.51738	7.56797	7.36595
sp|Q9UDY2-7|ZO2_HUMAN	TJP2	ZO2_HUMAN Isoform 7 of Tight junction protein ZO-2	23	7.05215	6.2156	7.19022	6.69766	6.46108	5.80625	6.69713	5.81363	5.85944	5.10826	6.47557	5.23518	5.97054	5.40213	7.79295	6.2222
sp|Q02086|SP2_HUMAN	SP2	SP2_HUMAN Transcription factor Sp2	1	6.04783	7.24111	6.94195	5.23126	6.09474	6.26658	5.8564	6.65216	6.78472	6.47643	4.825	6.728	7.16151	6.50994	5.32355	5.85882
sp|Q9NW68-3|BSDC1_HUMAN	BSDC1	BSDC1_HUMAN Isoform 3 of BSD domain-containing protein 1	8	4.79144	4.63739	5.02282	5.08455	5.36902	5.81439	5.36447	5.61495	5.86281	6.36223	5.50058	6.2378	7.48947	8.0395	8.63792	10.1706
sp|Q96DB5|RMD1_HUMAN	RMDN1	RMD1_HUMAN Regulator of microtubule dynamics protein 1	28	4.95945	4.85598	4.89223	5.0943	5.69056	6.03023	5.35427	5.88656	5.81384	6.22889	5.9125	6.43	7.31459	7.67515	8.5396	9.32186
sp|Q6ZXV5|TMTC3_HUMAN	TMTC3	TMTC3_HUMAN Transmembrane and TPR repeat-containing protein 3	11	7.2333	7.37817	7.36667	7.26488	6.34992	6.27151	6.27099	6.28357	5.94794	5.83315	5.97895	6.09029	5.23649	5.79797	5.24122	5.45498
sp|Q12866|MERTK_HUMAN	MERTK	MERTK_HUMAN Tyrosine-protein kinase Mer	3	4.96444	5.41594	5.97494	5.69432	5.23669	6.01365	6.3494	5.63373	6.1168	7.13421	6.96982	7.40829	6.23694	6.50229	7.37937	6.96919
sp|Q6P1M3|L2GL2_HUMAN	LLGL2	L2GL2_HUMAN Lethal(2) giant larvae protein homolog 2	17	9.02501	9.44181	9.16631	9.08435	6.51716	6.32269	6.98189	6.40263	6.07774	5.44729	6.22779	5.60357	3.43156	4.58742	3.00438	2.6784
sp|O75410-2|TACC1_HUMAN	TACC1	TACC1_HUMAN Isoform 2 of Transforming acidic coiled-coil-containing protein 1	27	5.12831	5.32674	4.99115	5.09571	5.53021	5.87593	5.38237	5.66684	5.74961	6.06998	5.79172	6.29857	7.49549	7.49204	8.53109	9.57424
sp|O95359-3|TACC2_HUMAN	TACC2	TACC2_HUMAN Isoform 3 of Transforming acidic coiled-coil-containing protein 2	25	5.35693	5.82572	5.05637	5.18479	5.61767	5.78419	5.47466	5.74367	5.84076	6.16664	5.76643	6.2461	7.37354	7.24982	8.21177	9.10095
sp|Q99661|KIF2C_HUMAN	KIF2C	KIF2C_HUMAN Kinesin-like protein KIF2C	19	7.32179	7.55943	7.53095	7.14652	6.83009	6.66094	7.19752	6.72769	6.64295	6.17252	6.78696	6.14242	4.47303	4.85668	4.07392	3.87658
sp|O95674|CDS2_HUMAN	CDS2	CDS2_HUMAN Phosphatidate cytidylyltransferase 2	1	6.15697	7.56343	6.84639	7.63496	6.41176	6.66582	6.3101	6.47927	5.3438	6.05187	6.30032	6.22808	5.02727	5.75441	4.88387	6.34168
sp|Q92581-2|SL9A6_HUMAN	SLC9A6	SL9A6_HUMAN Isoform 2 of Sodium/hydrogen exchanger 6	5	6.356	7.28277	6.63464	6.45307	6.64554	6.21864	6.6623	5.79609	6.5546	6.46829	6.5081	6.30881	6.41848	5.46067	5.16246	5.06955
sp|Q5MIZ7|P4R3B_HUMAN	SMEK2	P4R3B_HUMAN Serine/threonine-protein phosphatase 4 regulatory subunit 3B	20	6.78306	6.98237	6.86019	6.79814	6.94581	6.72804	6.82072	6.6401	6.76406	6.44963	6.61331	6.36504	5.61015	5.21404	4.55051	3.87484
sp|Q6IN85|P4R3A_HUMAN	SMEK1	P4R3A_HUMAN Serine/threonine-protein phosphatase 4 regulatory subunit 3A	22	5.79559	5.84005	6.06522	5.97428	6.52722	6.26411	6.42353	6.36792	6.73005	6.84975	6.46335	6.24195	7.13978	6.12311	5.9779	5.21618
sp|Q8WVK7|SKA2_HUMAN	SKA2	SKA2_HUMAN Spindle and kinetochore-associated protein 2	4	7.14887	7.45189	7.48508	7.76531	6.6341	6.30395	6.81843	6.91265	6.25878	6.30647	7.00003	6.03118	4.90223	5.01652	4.54194	3.42259
sp|P34932|HSP74_HUMAN	HSPA4	HSP74_HUMAN Heat shock 70 kDa protein 4	157	4.81478	4.82929	4.91592	4.94082	5.59402	6.04376	5.60388	5.88211	5.85693	6.63892	6.21342	6.29066	7.89953	7.68343	8.46646	8.32606
sp|O95757|HS74L_HUMAN	HSPA4L	HS74L_HUMAN Heat shock 70 kDa protein 4L	46	5.53881	5.65527	5.65159	5.26062	6.53783	6.17141	6.42158	6.22437	7.08049	6.67178	6.7058	6.56804	7.70139	6.17915	6.48456	5.14731
sp|Q92598|HS105_HUMAN	HSPH1	HS105_HUMAN Heat shock protein 105 kDa	112	6.397	6.05561	6.48929	6.62015	6.64643	6.42544	6.70538	6.53723	6.80766	6.84222	6.80604	6.53415	5.97201	5.4813	5.24346	4.43664
sp|P19021-5|AMD_HUMAN	PAM	AMD_HUMAN Isoform 5 of Peptidyl-glycine alpha-amidating monooxygenase	21	5.63998	5.38438	5.69555	5.54324	6.07966	6.19109	6	6.08941	6.09112	6.35116	5.85428	6.29929	6.61008	7.0985	7.37163	7.70064
sp|O60437|PEPL_HUMAN	PPL	PEPL_HUMAN Periplakin	35	5.81731	5.9015	5.83463	5.98662	5.79154	6.30259	5.70622	6.22362	6.0836	5.99419	5.8819	6.3236	6.68012	6.50639	7.34176	7.62442
sp|Q5SW79|CE170_HUMAN	CEP170	CE170_HUMAN Centrosomal protein of 170 kDa	22	7.81928	8.00702	7.72482	7.67106	6.20298	5.88107	6.34635	6.1372	5.85726	5.4341	6.04055	5.86722	5.15065	5.64005	5.19442	5.02595
sp|O00515|LAD1_HUMAN	LAD1	LAD1_HUMAN Ladinin-1	24	6.50662	6.66939	6.3951	6.63442	6.17621	6.2068	6.03607	6.03377	6.26954	6.2267	6.18874	6.26304	5.88578	6.17538	6.27816	6.05428
sp|Q9Y4F5|C170B_HUMAN	CEP170B	C170B_HUMAN Centrosomal protein of 170 kDa protein B	10	7.51279	7.985	7.26022	7.29248	6.3359	6.08355	6.41234	6.37942	6.10228	5.81202	6.29312	6.10373	5.13451	5.32633	5.10432	4.86201
sp|A0MZ66|SHOT1_HUMAN	KIAA1598	SHOT1_HUMAN Shootin-1	47	4.94345	5.08332	4.92045	5.03219	5.56321	5.89611	5.25967	5.67762	5.72331	6.24065	5.71808	6.30981	7.42675	8.06964	8.46268	9.67307
sp|P41229|KDM5C_HUMAN	KDM5C	KDM5C_HUMAN Lysine-specific demethylase 5C	17	6.85617	6.72142	7.05177	7.2911	6.73617	6.5861	6.79938	6.69111	6.77715	6.40753	6.92842	6.37393	5.43048	4.92754	4.58937	3.83235
sp|P29375|KDM5A_HUMAN	KDM5A	KDM5A_HUMAN Lysine-specific demethylase 5A	1	6.12676	7.77655	8.30995	5.93122	7.1367	6.97157	7.7672	6.375	7.2092	6.17513	6.262	6.4287	5.16291	4.51425	4.52218	3.33067
sp|P13798|ACPH_HUMAN	APEH	ACPH_HUMAN Acylamino-acid-releasing enzyme	59	5.08588	5.29747	4.95637	5.13818	5.4695	5.85447	5.22474	5.65268	5.74895	6.38764	5.58392	6.31	7.4847	7.68334	8.50356	9.61859
sp|Q13126|MTAP_HUMAN	MTAP	MTAP_HUMAN S-methyl-5'-thioadenosine phosphorylase	102	4.85786	4.73609	4.72566	5.08605	5.39374	5.99059	5.28706	5.75755	5.56381	6.52842	5.70582	6.26129	7.60431	7.96851	8.5883	9.94495
sp|Q9NWS0|PIHD1_HUMAN	PIH1D1	PIHD1_HUMAN PIH1 domain-containing protein 1	12	6.88629	6.98995	7.03671	6.97987	6.38222	6.38035	6.57721	6.58579	6.39328	6.43756	6.61919	6.02822	5.2701	5.22736	5.09408	5.11182
sp|O43719|HTSF1_HUMAN	HTATSF1	HTSF1_HUMAN HIV Tat-specific factor 1	56	5.2583	5.84588	5.13152	5.37044	5.68409	5.47801	5.03882	5.34884	5.97572	6.11284	5.30227	6.29103	7.71291	7.83611	8.46315	9.15005
sp|Q9H6Y2|WDR55_HUMAN	WDR55	WDR55_HUMAN WD repeat-containing protein 55	6	7.57755	7.96381	7.56671	7.08523	7.0307	6.65877	6.90927	6.43966	6.60882	5.89489	6.13118	5.97209	4.92174	4.96149	4.28552	3.99257
sp|P22830-2|HEMH_HUMAN	FECH	HEMH_HUMAN Isoform 2 of Ferrochelatase, mitochondrial	24	6.76052	6.54758	7.30842	7.29715	6.7793	6.11971	7.75344	7.71097	6.44179	5.79995	7.78622	7.20296	4.43007	4.43003	4.31946	3.31244
sp|P13797|PLST_HUMAN	PLS3	PLST_HUMAN Plastin-3	67	5.30495	5.11044	5.28091	5.21658	6.38235	6.21848	6.09931	6.11063	6.75617	6.56103	6.27196	6.40294	7.67655	6.77026	7.30935	6.52808
sp|Q14651|PLSI_HUMAN	PLS1	PLSI_HUMAN Plastin-1	33	6.67122	6.10993	6.63977	6.512	6.93032	6.38658	6.74266	6.47305	6.95163	6.59146	6.69463	6.51483	5.97619	5.36006	5.11847	4.3272
sp|P13796|PLSL_HUMAN	LCP1	PLSL_HUMAN Plastin-2	3	5.39692	6.19178	4.90271	4.90484	5.80837	5.90483	5.77212	6.08454	5.66688	6.10574	5.93451	6.15136	6.83264	7.755	7.79028	8.79749
sp|P28360|MSX1_HUMAN	MSX1	MSX1_HUMAN Homeobox protein MSX-1	2	6.50504	7.53102	6.52131	6.44133	5.42383	6.06573	6.9775	6.69087	5.56321	6.78289	6.52746	6.02141	6.03241	6.11555	4.738	6.06244
sp|P12270|TPR_HUMAN	TPR	TPR_HUMAN Nucleoprotein TPR	149	4.80091	5.04264	4.67283	4.90283	5.39051	5.94912	5.27799	5.74865	5.63124	6.44125	5.70053	6.31502	7.51677	7.99594	8.67341	9.94037
sp|Q15154|PCM1_HUMAN	PCM1	PCM1_HUMAN Pericentriolar material 1 protein	21	6.09491	6.56006	6.23936	6.29417	5.88401	6.15771	5.88033	5.86877	5.97725	6.01317	6.15852	6.38473	6.20194	6.55372	6.6471	7.08425
sp|Q9NPF5|DMAP1_HUMAN	DMAP1	DMAP1_HUMAN DNA methyltransferase 1-associated protein 1	8	8.26735	6.29264	7.89285	8.48227	6.78413	6.09007	6.95529	6.3423	6.38524	5.75685	6.72185	6.02449	4.49703	5.21812	4.30348	3.98603
sp|Q6XZF7|DNMBP_HUMAN	DNMBP	DNMBP_HUMAN Dynamin-binding protein	39	6.67294	6.71788	6.94194	6.66359	6.77919	6.65578	6.84216	6.62822	6.89114	6.42031	6.61905	6.52705	5.47695	4.96785	4.94147	4.25447
sp|Q96EE3-1|SEH1_HUMAN	SEH1L	SEH1_HUMAN Isoform B of Nucleoporin SEH1	17	5.41537	5.96456	5.39767	5.4144	5.70601	5.95388	5.692	5.96362	5.86355	6.32925	6.01936	6.39421	7.0212	7.01865	7.68793	8.15834
sp|Q13136|LIPA1_HUMAN	PPFIA1	LIPA1_HUMAN Liprin-alpha-1	27	7.47438	7.31887	7.58487	7.51254	6.98634	6.45602	6.67144	6.47781	6.72725	6.09727	6.55285	6.32877	4.55761	4.8643	4.4775	3.91219
sp|O75145|LIPA3_HUMAN	PPFIA3	LIPA3_HUMAN Liprin-alpha-3	3	7.48111	7.87025	8.30533	8.04092	6.51999	6.03963	6.69239	6.38594	6.59456	6.06493	6.18784	5.98926	4.55489	5.30716	4.45508	3.5107
sp|P18858|DNLI1_HUMAN	LIG1	DNLI1_HUMAN DNA ligase 1	27	7.22249	6.62084	7.44836	7.53631	6.89651	6.83993	7.38269	6.81596	6.57674	6.09898	7.08631	6.27813	4.68228	4.75077	4.13699	3.62672
sp|Q96MW5|COG8_HUMAN	COG8	COG8_HUMAN Conserved oligomeric Golgi complex subunit 8	12	8.57606	8.95675	8.35848	8.17847	6.8589	6.60268	7.40952	6.78223	6.10187	5.67497	6.72478	5.92171	3.75645	4.33997	3.07333	2.68382
sp|Q6V1X1|DPP8_HUMAN	DPP8	DPP8_HUMAN Dipeptidyl peptidase 8	5	5.09043	5.87824	5.28555	5.11243	5.47419	5.46134	5.09174	5.30732	6.22055	5.83737	5.11107	6.49121	8.85826	7.79205	7.91484	9.07342
sp|Q86TI2-2|DPP9_HUMAN	DPP9	DPP9_HUMAN Isoform 2 of Dipeptidyl peptidase 9	42	5.15879	5.37886	5.08904	5.17898	5.70141	5.80108	5.45944	5.6837	6.06211	6.52562	5.625	6.26362	7.57338	7.41252	8.18668	8.89977
sp|Q92917|GPKOW_HUMAN	GPKOW	GPKOW_HUMAN G patch domain and KOW motifs-containing protein	20	5.71149	5.85349	5.73483	5.39673	6.62178	6.09774	6.16915	6.0241	6.90857	6.37414	6.01546	6.39224	7.2989	6.29875	6.54795	6.55468
sp|Q9H9A7|RMI1_HUMAN	RMI1	RMI1_HUMAN RecQ-mediated genome instability protein 1	6	5.83332	6.35816	5.852	6.05515	6.22029	6.43417	6.83161	6.23544	6.42717	6.73626	6.15959	5.96592	7.34775	6.13261	5.92203	5.48852
sp|Q8TBC4|UBA3_HUMAN	UBA3	UBA3_HUMAN NEDD8-activating enzyme E1 catalytic subunit	22	6.01956	5.63219	6.13577	5.94293	7.17323	6.75479	7.00446	6.8273	7.29739	6.79224	7.36539	6.62583	6.7016	5.17468	4.67396	3.87868
sp|A6NKF1|SAC31_HUMAN	SAC3D1	SAC31_HUMAN SAC3 domain-containing protein 1	3	6.92329	5.67296	7.28301	7.83293	7.31624	7.02297	7.81043	6.66513	6.61929	6.00459	6.68191	6.3482	4.95745	4.89255	4.56086	3.4082
sp|Q9Y2X7|GIT1_HUMAN	GIT1	GIT1_HUMAN ARF GTPase-activating protein GIT1	21	6.91987	6.64234	7.17954	6.93479	7.24964	6.78946	7.33394	6.77371	7.1139	6.65355	7.40061	6.70981	4.97049	4.45936	3.98211	2.88687
sp|Q14161|GIT2_HUMAN	GIT2	GIT2_HUMAN ARF GTPase-activating protein GIT2	6	7.20848	5.97365	7.21967	7.37996	7.28858	7.11734	7.25483	6.99201	6.93524	6.28173	6.88456	6.06493	4.63752	5.05854	3.93815	3.76479
sp|Q9NUX5|POTE1_HUMAN	POT1	POTE1_HUMAN Protection of telomeres protein 1	7	5.67703	6.0725	6.00758	5.93851	6.61917	6.54413	6.57727	6.4781	6.50076	6.29035	6.901	6.26461	6.87626	5.91468	6.21543	5.12264
sp|Q9H672|ASB7_HUMAN	ASB7	ASB7_HUMAN Ankyrin repeat and SOCS box protein 7	2	5.92293	6.42496	6.82203	6.4251	6.32753	6.07199	5.96842	6.73768	7.16274	6.32301	6.93828	7.17217	6.57539	5.05686	5.25124	4.81967
sp|P98171-2|RHG04_HUMAN	ARHGAP4	RHG04_HUMAN Isoform 2 of Rho GTPase-activating protein 4	8	7.95168	9.111	8.40747	8.49684	6.85396	6.71126	6.75405	6.56922	6.04614	5.27703	6.0736	5.72295	3.9614	5.12883	3.67163	3.26295
sp|P57764|GSDMD_HUMAN	GSDMD	GSDMD_HUMAN Gasdermin-D	9	8.27449	8.16805	8.13504	7.54925	7.46632	6.64779	7.51455	6.94385	6.75594	5.86822	6.67333	5.71368	4.09259	4.2509	3.42267	2.52335
sp|Q7L5D6|GET4_HUMAN	GET4	GET4_HUMAN Golgi to ER traffic protein 4 homolog	10	5.42411	4.82387	5.83249	5.78624	6.154	5.82941	6.40599	6.09153	6.83079	6.33486	6.80079	6.70811	6.90132	6.44132	7.23568	6.39948
sp|Q15067-2|ACOX1_HUMAN	ACOX1	ACOX1_HUMAN Isoform 2 of Peroxisomal acyl-coenzyme A oxidase 1	40	5.23428	4.90086	5.00001	4.92086	5.8185	6.11452	5.64174	5.87583	5.98991	6.24918	5.66154	6.41814	7.52208	7.26901	7.86831	9.51522
sp|Q15067-3|ACOX1_HUMAN	ACOX1	ACOX1_HUMAN Isoform 3 of Peroxisomal acyl-coenzyme A oxidase 1	1	6.16198	6.89699	5.81546	5.65065	5.7185	3.08678	2.73262	3.55933	6.19398	4.5686	3.00626	4.81385	9.4104	8.25479	11.457	12.6728
sp|Q9NV88|INT9_HUMAN	INTS9	INT9_HUMAN Integrator complex subunit 9	19	7.82952	7.4625	7.84719	7.78011	6.90932	6.43375	6.97064	6.63721	6.82396	6.19967	6.47405	6.20725	4.47252	4.82337	3.76234	3.36662
sp|Q7L1Q6-3|BZW1_HUMAN	BZW1	BZW1_HUMAN Isoform 3 of Basic leucine zipper and W2 domain-containing protein 1	42	7.2883	7.17391	7.20865	7.04627	7.20288	6.93067	7.19624	7.13136	6.88122	6.58774	6.70431	6.65453	4.53986	4.47407	3.75524	3.22475
sp|Q9Y6E2|BZW2_HUMAN	BZW2	BZW2_HUMAN Basic leucine zipper and W2 domain-containing protein 2	32	7.80743	7.47999	7.67125	7.69278	7.32385	6.81514	7.26751	6.82096	6.80253	6.29703	6.70446	6.34544	4.09834	4.59363	3.43384	2.84583
tr|B5MCH7|B5MCH7_HUMAN	BZW2	B5MCH7_HUMAN Basic leucine zipper and W2 domain-containing protein 2	1	8.09699	10.7691	7.56327	8.07574	6.57449	5.34965	5.20576	4.77579	8.61485	6.47688	5.07335	6.92619	5.36425	4.98018	3.08982	3.06366
sp|O94804|STK10_HUMAN	STK10	STK10_HUMAN Serine/threonine-protein kinase 10	27	5.29227	5.07413	5.32551	5.51043	5.6774	5.91496	5.61529	5.71203	5.98071	6.40345	5.90302	6.27612	7.71587	7.37615	8.10295	8.11971
sp|Q9H2G2|SLK_HUMAN	SLK	SLK_HUMAN STE20-like serine/threonine-protein kinase	45	5.28872	5.17502	5.31803	5.26585	5.95821	6.03135	5.94252	6.10703	6.22478	6.49612	6.13065	6.54895	7.33031	6.98444	7.58699	7.61105
sp|Q9H2G2-2|SLK_HUMAN	SLK	SLK_HUMAN Isoform 2 of STE20-like serine/threonine-protein kinase	1	5.24667	6.0458	6.45321	5.73133	5.21388	3.89518	3.54292	4.24475	6.62054	5.74298	5.30216	8.53219	7.9782	8.49402	8.82299	8.13317
sp|Q9BW85|CCD94_HUMAN	CCDC94	CCD94_HUMAN Coiled-coil domain-containing protein 94	11	5.23107	5.55174	5.07568	5.66628	5.30619	5.40306	5.14822	5.39279	5.73735	6.32408	5.79877	6.41436	7.49831	7.7121	8.03395	9.70604
sp|Q5M775|CYTSB_HUMAN	SPECC1	CYTSB_HUMAN Cytospin-B	6	5.53149	6.13512	5.36938	5.53211	5.33472	5.95497	5.27567	5.35672	6.12748	6.27011	5.38807	6.68321	6.78482	7.35886	7.76658	9.1307
sp|Q9Y385|UB2J1_HUMAN	UBE2J1	UB2J1_HUMAN Ubiquitin-conjugating enzyme E2 J1	6	6.14386	6.26907	5.58742	5.25701	6.53502	6.23675	6.40664	6.08547	6.61046	6.61895	6.25152	6.16199	7.14487	6.23643	6.44876	6.00578
sp|Q86WK9|MPRA_HUMAN	PAQR7	MPRA_HUMAN Membrane progestin receptor alpha	1	5.74538	7.22507	6.4174	5.77482	6.79369	7.54247	6.83249	7.15317	7.3866	6.58435	5.87447	6.01363	5.8728	5.01986	4.77467	4.98913
sp|Q9BYV7|BCDO2_HUMAN	BCO2	BCDO2_HUMAN Beta,beta-carotene 9',10'-oxygenase	2	5.91856	5.61763	5.85148	5.87731	6.22392	5.86761	5.44206	5.59022	5.98653	6.20432	5.77552	6.04543	7.45698	7.32049	6.72166	8.10029
sp|P60842|IF4A1_HUMAN	EIF4A1	IF4A1_HUMAN Eukaryotic initiation factor 4A-I	40	7.98292	6.09451	8.16035	7.97232	7.55766	7.06518	7.92547	7.34527	6.82539	6.32548	6.76693	6.17654	3.75176	4.17836	3.2384	2.63345
tr|J3QS69|J3QS69_HUMAN	EIF4A1	J3QS69_HUMAN Eukaryotic initiation factor 4A-I (Fragment)	1	7.92586	7.20367	5.7322	5.89726	6.53223	4.98331	5.70331	5.10199	5.10981	5.90711	5.86137	9.4391	5.09888	7.01477	6.09381	6.39533
sp|Q14240-2|IF4A2_HUMAN	EIF4A2	IF4A2_HUMAN Isoform 2 of Eukaryotic initiation factor 4A-II	58	7.54489	7.52742	7.34624	7.17138	6.98875	6.64385	7.11962	6.74661	6.92064	6.3588	6.58863	6.36216	4.70508	4.63308	4.03115	3.31169
sp|P38919|IF4A3_HUMAN	EIF4A3	IF4A3_HUMAN Eukaryotic initiation factor 4A-III	61	8.26368	6.33029	8.09871	8.08935	7.17527	6.70309	7.36632	7.04089	6.82847	6.14329	6.61648	6.13322	4.09075	4.5832	3.53795	2.99905
sp|Q9H3K2|GHITM_HUMAN	GHITM	GHITM_HUMAN Growth hormone-inducible transmembrane protein	11	5.1019	5.07187	4.98947	5.17706	5.64156	6.02482	5.53703	5.96299	5.58009	6.39789	5.93969	6.12333	7.11305	7.79321	8.29027	9.25576
sp|Q16533|SNPC1_HUMAN	SNAPC1	SNPC1_HUMAN snRNA-activating protein complex subunit 1	4	7.12852	7.507	7.59949	7.19222	6.59807	6.71257	7.00772	6.08563	6.41737	6.36871	6.12692	6.23425	5.5692	5.07202	4.38999	3.99033
sp|Q8IWE2|NXP20_HUMAN	FAM114A1	NXP20_HUMAN Protein NOXP20	11	5.10971	4.50649	5.43544	5.27827	6.05003	6.6752	5.93706	6.15444	6.07166	6.80069	6.58915	6.83861	6.87537	6.52497	7.30474	7.84819
sp|P52948|NUP98_HUMAN	NUP98	NUP98_HUMAN Nuclear pore complex protein Nup98-Nup96	33	7.25633	6.9979	7.72173	7.41472	6.67108	6.49156	6.93759	6.60086	6.65651	6.07772	6.44432	6.13519	5.082	5.06146	4.54116	3.90986
sp|Q8TAT6-2|NPL4_HUMAN	NPLOC4	NPL4_HUMAN Isoform 2 of Nuclear protein localization protein 4 homolog	42	5.08787	5.28263	5.14221	5.23718	5.94673	5.82107	5.63626	5.74704	6.19063	6.52387	5.88423	6.09395	7.8646	7.48925	8.21856	7.83392
tr|I3L3I1|I3L3I1_HUMAN	NPLOC4	I3L3I1_HUMAN Nuclear protein localization protein 4 homolog (Fragment)	1	4.57741	4.16817	4.35882	4.34034	5.234	5.37426	5.45107	5.44042	6.04259	6.16159	5.29896	5.53249	9.41678	8.43651	10.1969	9.96966
sp|Q13303|KCAB2_HUMAN	KCNAB2	KCAB2_HUMAN Voltage-gated potassium channel subunit beta-2	8	5.40188	5.84794	5.33576	4.97552	5.93914	5.86915	5.69112	5.60989	6.36696	6.40497	6.12548	6.00933	7.90568	6.84004	8.01136	7.66578
sp|Q5JVS0|HABP4_HUMAN	HABP4	HABP4_HUMAN Intracellular hyaluronan-binding protein 4	5	6.45073	5.81619	6.30246	6.73337	5.48548	5.92688	6.20539	5.81064	5.66793	5.63914	5.31914	5.83161	6.85179	6.83518	7.03734	8.08673
sp|Q8IZ07|AN13A_HUMAN	ANKRD13A	AN13A_HUMAN Ankyrin repeat domain-containing protein 13A	3	5.48143	4.53505	5.83661	5.43816	6.47817	6.61775	6.29943	6.4071	6.99874	7.01299	6.40961	6.62219	7.11034	6.55907	7.04415	5.1492
sp|Q8IWZ3-6|ANKH1_HUMAN	ANKHD1	ANKH1_HUMAN Isoform 6 of Ankyrin repeat and KH domain-containing protein 1	31	6.87335	6.70897	6.97366	6.89627	6.57297	6.47568	6.74806	6.37207	6.62066	6.18125	6.55053	6.32168	5.60958	5.53216	4.97586	4.58725
sp|O75179|ANR17_HUMAN	ANKRD17	ANR17_HUMAN Ankyrin repeat domain-containing protein 17	35	6.58151	6.85142	6.62949	6.69411	6.30605	6.20583	6.41453	6.28247	6.26121	6.06998	6.35611	6.0908	6.04619	6.16607	5.68959	5.35464
sp|O60841|IF2P_HUMAN	EIF5B	IF2P_HUMAN Eukaryotic translation initiation factor 5B	49	9.07977	8.13205	9.09684	8.68861	6.97581	6.20922	7.10024	6.45373	6.12344	5.18041	6.17533	5.33056	3.98749	4.80668	3.8148	2.84501
sp|Q5R372-3|RBG1L_HUMAN	RABGAP1L	RBG1L_HUMAN Isoform 3 of Rab GTPase-activating protein 1-like	6	7.4152	7.82902	7.31681	7.66944	6.92666	6.8033	7.21177	6.76879	6.78624	6.88802	6.74217	6.22982	3.83068	4.52588	3.82985	3.22637
sp|Q9Y3P9|RBGP1_HUMAN	RABGAP1	RBGP1_HUMAN Rab GTPase-activating protein 1	18	6.953	6.79909	7.13653	6.95707	6.73407	6.39791	6.38562	6.38562	7.03203	6.37182	6.46693	6.61883	5.68603	5.12032	4.64548	4.30966
sp|Q5R372-5|RBG1L_HUMAN	RABGAP1L	RBG1L_HUMAN Isoform 5 of Rab GTPase-activating protein 1-like	7	6.70148	7.01374	6.87638	6.82722	6.65289	6.11463	6.51091	5.91648	6.68074	6.38785	6.64131	6.78336	5.75681	5.28207	5.02126	4.83288
sp|P49354|FNTA_HUMAN	FNTA	FNTA_HUMAN Protein farnesyltransferase/geranylgeranyltransferase type-1 subunit alpha	17	5.28445	4.7587	5.35593	5.50265	5.84844	5.97003	5.54612	5.76739	5.92019	6.86352	6.01069	6.27787	7.65245	7.50177	7.9727	7.7671
sp|Q9NYT0|PLEK2_HUMAN	PLEK2	PLEK2_HUMAN Pleckstrin-2	9	8.14005	8.06699	8.31221	8.12807	7.42262	6.74353	7.59845	6.58909	6.67109	5.65786	6.95949	5.74229	3.76701	4.37827	3.09603	2.72694
sp|Q8WVQ1|CANT1_HUMAN	CANT1	CANT1_HUMAN Soluble calcium-activated nucleotidase 1	12	5.36871	5.79679	5.46123	5.4158	6.00002	5.93171	5.8547	5.89106	6.16005	6.58519	5.85174	6.17559	7.11645	7.04024	7.70224	7.64847
sp|Q9NRN7|ADPPT_HUMAN	AASDHPPT	ADPPT_HUMAN L-aminoadipate-semialdehyde dehydrogenase-phosphopantetheinyl transferase	16	5.90436	6.09713	6.07531	5.70011	6.68742	6.23866	6.54652	6.22883	7.08569	6.661	6.73792	6.71652	7.08166	5.97781	5.52377	4.73729
sp|Q8IW35-2|CEP97_HUMAN	CEP97	CEP97_HUMAN Isoform 2 of Centrosomal protein of 97 kDa	16	7.0882	6.67706	7.22336	7.17371	6.96695	6.42305	6.89692	6.65321	6.66036	6.30649	6.74315	6.74697	5.0767	5.03979	4.51726	3.8068
sp|Q00059|TFAM_HUMAN	TFAM	TFAM_HUMAN Transcription factor A, mitochondrial	9	5.92308	6.10098	5.942	5.92855	5.99865	5.79798	5.7258	5.87097	5.9217	6.15414	6.00956	6.01896	6.71196	7.66882	7.09416	7.13271
sp|Q6DT37|MRCKG_HUMAN	CDC42BPG	MRCKG_HUMAN Serine/threonine-protein kinase MRCK gamma	7	8.65157	6.67882	8.68623	9.77812	6.57106	5.91034	6.97403	6.60145	5.86163	5.52656	6.10729	5.99048	3.68022	5.3381	3.85163	3.79246
sp|Q9Y5S2|MRCKB_HUMAN	CDC42BPB	MRCKB_HUMAN Serine/threonine-protein kinase MRCK beta	32	7.37916	7.06217	7.46308	7.31539	6.77859	6.34801	6.89818	6.51832	6.67568	6.03892	6.65351	6.23221	5.14414	5.05323	4.58896	3.85044
sp|Q5VT25-6|MRCKA_HUMAN	CDC42BPA	MRCKA_HUMAN Isoform 6 of Serine/threonine-protein kinase MRCK alpha	25	8.82051	8.60532	9.12601	8.63234	7.16456	6.1059	7.35088	6.4433	6.59895	5.40017	6.16417	5.44659	3.76578	4.58209	3.1923	2.60115
sp|Q8IU85|KCC1D_HUMAN	CAMK1D	KCC1D_HUMAN Calcium/calmodulin-dependent protein kinase type 1D	12	5.35102	5.63725	5.87213	5.58101	6.3293	7.04907	6.78292	6.8051	6.40187	6.71062	7.07731	6.67819	6.11355	5.54209	6.19323	5.87534
sp|Q14012|KCC1A_HUMAN	CAMK1	KCC1A_HUMAN Calcium/calmodulin-dependent protein kinase type 1	4	5.23501	5.39513	5.69846	5.59796	6.44761	6.39212	5.75844	6.68208	7.01459	6.53215	6.18036	6.2133	7.13292	6.23032	6.6827	6.80684
sp|Q9HCS7|SYF1_HUMAN	XAB2	SYF1_HUMAN Pre-mRNA-splicing factor SYF1	15	8.2792	7.76208	8.47797	8.80334	6.72172	6.17456	6.91259	6.78115	6.06711	5.88559	6.3553	5.94664	4.25665	4.74687	3.89998	2.92926
sp|Q5H9U9|DDX6L_HUMAN	DDX60L	DDX6L_HUMAN Probable ATP-dependent RNA helicase DDX60-like	1	8.70843	8.66147	6.49994	7.57135	6.20296	5.9427	6.34071	7.25722	6.73122	4.82759	5.45436	6.14378	4.80735	5.97732	4.39034	4.48324
sp|Q9BZF9|UACA_HUMAN	UACA	UACA_HUMAN Uveal autoantigen with coiled-coil domains and ankyrin repeats	40	7.69835	7.54321	7.79371	7.74218	6.95355	6.4085	7.08117	6.72916	6.72098	6.01859	6.52084	6.23201	4.39063	4.77058	3.89397	3.50255
sp|P22413|ENPP1_HUMAN	ENPP1	ENPP1_HUMAN Ectonucleotide pyrophosphatase/phosphodiesterase family member 1	7	5.45658	5.1728	5.43383	5.37962	5.41365	5.77877	5.52535	5.82078	5.83728	6.8212	5.64798	5.84713	7.19936	7.6645	8.52161	8.47955
sp|P98194-3|AT2C1_HUMAN	ATP2C1	AT2C1_HUMAN Isoform 3 of Calcium-transporting ATPase type 2C member 1	19	7.19982	7.26369	7.21094	7.14665	6.71607	6.37602	6.91135	6.50888	6.7132	6.29919	6.50199	6.31548	5.05592	5.24087	4.47322	4.06671
sp|Q09472|EP300_HUMAN	EP300	EP300_HUMAN Histone acetyltransferase p300	11	5.4973	6.06869	5.49179	5.38597	6.02618	6.00119	6.1145	5.9458	6.72875	6.342	6.46489	6.52888	7.09052	6.44972	7.2143	6.6495
tr|H0Y612|H0Y612_HUMAN	TRIM33	H0Y612_HUMAN E3 ubiquitin-protein ligase TRIM33 (Fragment)	2	6.26434	3.65236	6.28122	5.8182	6.72314	6.46921	6.77164	5.91529	6.6183	6.38985	6.94583	6.6429	6.78226	5.67245	6.81697	6.23604
sp|O15164|TIF1A_HUMAN	TRIM24	TIF1A_HUMAN Transcription intermediary factor 1-alpha	10	6.87026	5.42793	6.66065	6.82944	6.48595	6.43399	6.8094	6.47026	6.55698	6.62868	7.03046	6.62674	5.39576	5.18302	5.39878	5.1917
sp|Q9UPN9-2|TRI33_HUMAN	TRIM33	TRI33_HUMAN Isoform Beta of E3 ubiquitin-protein ligase TRIM33	36	6.19623	6.29903	6.31915	6.21813	6.64527	6.3934	6.56323	6.43749	6.99471	6.61366	6.71055	6.47665	6.14957	5.66024	5.42269	4.9
sp|Q92793|CBP_HUMAN	CREBBP	CBP_HUMAN CREB-binding protein	32	5.09755	5.2172	5.18419	5.18587	5.84433	6.20206	5.79663	5.99628	5.99056	6.43693	6.18925	6.367	7.16748	7.18204	8.00192	8.14072
sp|O75962|TRIO_HUMAN	TRIO	TRIO_HUMAN Triple functional domain protein	26	7.71623	7.7177	7.83519	7.81813	6.73894	6.49515	7.10676	6.47126	6.42919	6.05802	6.96863	6.02877	4.41517	4.66374	4.04345	3.49366
sp|O60229|KALRN_HUMAN	KALRN	KALRN_HUMAN Kalirin	3	5.8396	5.10119	6.06048	6.20321	6.44671	6.094	6.48972	6.02121	6.61421	6.76306	7.10547	6.74813	6.20469	5.8328	6.09872	6.37679
sp|P30084|ECHM_HUMAN	ECHS1	ECHM_HUMAN Enoyl-CoA hydratase, mitochondrial	30	4.94838	4.56011	4.69405	4.91953	5.60804	6.27685	5.62268	6.13	5.7157	6.56011	6.07769	6.23992	7.29981	7.749	8.31825	9.27989
sp|P35241|RADI_HUMAN	RDX	RADI_HUMAN Radixin	45	5.11249	5.25798	4.94369	5.06811	5.50347	5.88222	5.31933	5.65206	5.73003	6.15257	5.74685	6.22128	7.57364	7.66097	8.66987	9.50544
sp|P15311|EZRI_HUMAN	EZR	EZRI_HUMAN Ezrin	211	4.94007	5.20199	4.67591	4.93327	5.46306	5.93851	5.39119	5.85571	5.67873	6.2335	5.93154	6.27445	7.44289	7.69346	8.59193	9.75378
sp|P26038|MOES_HUMAN	MSN	MOES_HUMAN Moesin	62	5.07966	5.50582	4.68783	4.93134	5.49145	6.05787	5.31977	5.8236	5.66699	6.31444	5.57328	6.07088	7.39276	7.74413	8.64728	9.69291
sp|Q5TZA2|CROCC_HUMAN	CROCC	CROCC_HUMAN Rootletin	61	5.27218	6.48083	5.14961	5.33816	5.79184	6.0557	5.36339	5.80818	5.72159	6.33423	5.45071	6.20434	6.79443	7.2833	7.83642	9.11509
sp|Q14160|SCRIB_HUMAN	SCRIB	SCRIB_HUMAN Protein scribble homolog	35	6.99595	7.21108	6.98416	6.8828	6.50231	6.28976	6.59366	6.5061	6.51802	6.22885	6.21616	6.08807	5.3426	5.60617	5.12576	4.90854
sp|Q9BTT6|LRRC1_HUMAN	LRRC1	LRRC1_HUMAN Leucine-rich repeat-containing protein 1	9	7.38958	5.69221	7.21959	7.42391	6.8662	7.06613	7.33585	6.78301	6.65969	6.57668	7.62736	6.4677	4.6164	4.55288	4.13028	3.59254
tr|H0YDF9|H0YDF9_HUMAN	SCRIB	H0YDF9_HUMAN Protein scribble homolog (Fragment)	1	6.695	8.7987	7.02446	6.44327	6.63245	6.13985	6.53857	6.13085	6.2936	5.43021	6.93667	6.49545	5.05182	4.75536	5.19039	5.44335
sp|P48643|TCPE_HUMAN	CCT5	TCPE_HUMAN T-complex protein 1 subunit epsilon	169	5.48711	5.63151	5.49338	5.43697	6.25635	6.6566	6.472	6.54689	6.5327	6.92654	6.67658	6.69631	6.43201	6.126	6.28773	6.3413
sp|P50991|TCPD_HUMAN	CCT4	TCPD_HUMAN T-complex protein 1 subunit delta	153	6.18619	5.95099	6.17998	6.06428	6.71661	6.68058	6.86034	6.67067	6.94127	6.85995	6.94117	6.48406	6.35275	5.43596	5.35335	4.32186
sp|Q5TA45-5|INT11_HUMAN	CPSF3L	INT11_HUMAN Isoform 5 of Integrator complex subunit 11	12	7.99482	8.38179	8.31044	7.5185	6.78716	6.92569	7.4199	6.80577	6.15615	5.80704	6.22942	5.94935	4.23293	4.56307	3.61326	3.3047
sp|Q86XL3|ANKL2_HUMAN	ANKLE2	ANKL2_HUMAN Ankyrin repeat and LEM domain-containing protein 2	13	7.31686	7.41287	7.18988	7.31603	6.88865	6.5654	6.74587	6.58994	5.96287	6.26486	6.35683	6.23034	4.77238	5.33032	4.48956	4.56733
sp|Q6R327-3|RICTR_HUMAN	RICTOR	RICTR_HUMAN Isoform 3 of Rapamycin-insensitive companion of mTOR	9	9.08664	10.4835	9.19247	8.77994	6.33685	5.91676	6.77377	6.24132	6.31265	5.35736	5.30455	5.57885	3.64508	4.79856	3.1688	3.02287
sp|Q14166|TTL12_HUMAN	TTLL12	TTL12_HUMAN Tubulin--tyrosine ligase-like protein 12	43	6.33051	6.30501	6.32042	6.06105	7.43802	6.92666	7.40351	6.94547	7.56556	6.85616	7.64788	6.87096	5.92827	4.5209	3.89478	2.98485
sp|Q15366-2|PCBP2_HUMAN	PCBP2	PCBP2_HUMAN Isoform 2 of Poly(rC)-binding protein 2	64	5.2301	5.49974	5.09598	5.07587	5.79545	6.0433	5.73893	5.91021	5.94896	6.34149	5.97943	6.27929	7.38067	7.20135	8.03	8.44923
sp|Q15365|PCBP1_HUMAN	PCBP1	PCBP1_HUMAN Poly(rC)-binding protein 1	33	4.84114	4.68454	4.82609	5.14396	5.73057	6.15068	5.55043	6.00359	5.73198	6.4213	6.03099	6.66652	7.2142	7.47101	8.12908	9.40393
tr|F8VZX2|F8VZX2_HUMAN	PCBP2	F8VZX2_HUMAN Poly(rC)-binding protein 2	2	5.66939	5.21487	6.35681	5.41857	5.69713	6.38363	5.75738	6.2938	5.57312	6.16126	6.02177	5.54766	7.8808	6.59077	7.74194	7.69111
tr|G3V0E8|G3V0E8_HUMAN	PCBP2	G3V0E8_HUMAN Poly(RC) binding protein 2, isoform CRA_f	5	5.53348	4.89253	6.67999	7.10378	6.01849	5.69669	5.93981	5.16082	5.40932	6.08877	6.53329	6.18843	6.7883	6.34789	7.50694	8.11147
tr|F8W0G4|F8W0G4_HUMAN	PCBP2	F8W0G4_HUMAN Poly(rC)-binding protein 2 (Fragment)	1	4.97628	3.48648	4.93786	6.42453	8.45302	5.28146	5.42637	5.66329	6.13119	5.60066	5.1343	5.37863	9.14694	6.41781	8.59244	8.94874
tr|F8VRH0|F8VRH0_HUMAN	PCBP2	F8VRH0_HUMAN Poly(rC)-binding protein 2 (Fragment)	2	4.63233	2.64171	5.45896	4.79428	5.36798	6.91585	6.54297	6.48093	6.11969	7.14826	6.90773	7.03884	7.39297	6.21024	7.65676	8.69051
sp|Q9NX07|TSAP1_HUMAN	TRNAU1AP	TSAP1_HUMAN tRNA selenocysteine 1-associated protein 1	9	6.3887	6.57425	6.42808	6.25759	6.64484	6.19271	6.5918	6.24767	6.98597	6.36657	6.77559	6.68851	6.44261	5.65406	5.38188	4.37916
sp|Q6NVY1|HIBCH_HUMAN	HIBCH	HIBCH_HUMAN 3-hydroxyisobutyryl-CoA hydrolase, mitochondrial	33	4.88005	4.9905	4.87894	4.80876	5.84689	6.24513	5.74598	6.08313	6.19999	6.48775	6.19996	6.52165	7.61519	7.24492	8.0978	8.15336
sp|Q9H0R6|GATA_HUMAN	QRSL1	GATA_HUMAN Glutamyl-tRNA(Gln) amidotransferase subunit A, mitochondrial	14	7.4686	7.11868	7.9857	7.44297	7.42935	6.4548	7.22372	6.81627	6.55178	5.95398	6.69479	6.13	4.49004	4.86343	3.90355	3.47232
sp|P54577|SYYC_HUMAN	YARS	SYYC_HUMAN Tyrosine--tRNA ligase, cytoplasmic	75	7.09857	7.04899	7.0591	6.85276	7.30249	6.50167	7.05636	6.71209	7.15454	6.316	6.82319	6.23233	5.29011	4.84873	4.19412	3.50896
sp|P57768|SNX16_HUMAN	SNX16	SNX16_HUMAN Sorting nexin-16	4	5.30632	5.20821	5.20992	5.44742	5.31184	5.19933	5.42559	5.67649	5.88167	6.37157	5.87258	6.48168	7.41328	7.4938	8.072	9.62829
sp|Q9UGJ1|GCP4_HUMAN	TUBGCP4	GCP4_HUMAN Gamma-tubulin complex component 4	6	8.03631	7.18798	8.22612	8.55768	7.00172	6.26287	7.04574	6.58157	6.20298	6.10018	6.31423	6.0044	4.22447	5.13431	3.86774	3.2517
sp|O15344|TRI18_HUMAN	MID1	TRI18_HUMAN E3 ubiquitin-protein ligase Midline-1	8	7.48541	7.83934	7.75141	7.43112	7.48032	6.83859	7.36827	7.14561	6.42224	6.04554	6.58441	6.00291	4.2093	4.4986	3.71305	3.18389
sp|O43847-2|NRDC_HUMAN	NRD1	NRDC_HUMAN Isoform 2 of Nardilysin	42	5.72781	5.45347	5.76021	5.63889	6.53455	6.34898	6.47232	6.36547	6.85086	6.84335	6.8118	6.56037	7.23764	6.40822	5.96673	5.01933
sp|Q7Z460|CLAP1_HUMAN	CLASP1	CLAP1_HUMAN CLIP-associating protein 1	26	9.14203	9.2934	9.02978	8.7986	6.85883	6.31449	7.1237	6.43227	5.95322	5.504	6.04499	5.43743	3.42351	4.51485	3.19106	2.93785
tr|B7ZLX3|B7ZLX3_HUMAN	CLASP1	B7ZLX3_HUMAN CLASP1 protein	1	10.7157	11.5255	10.449	9.3977	6.57022	5.43439	7.54598	6.11347	5.69423	5.20911	6.20255	5.17885	2.23271	3.71097	2.14434	1.87536
tr|E7EW49|E7EW49_HUMAN	CLASP2	E7EW49_HUMAN CLIP-associating protein 2	9	8.53089	8.5195	8.55826	8.59738	6.90956	6.39117	6.68378	6.12987	6.1479	5.45329	6.17668	5.59234	4.24788	5.34743	3.52416	3.18992
sp|Q15543|TAF13_HUMAN	TAF13	TAF13_HUMAN Transcription initiation factor TFIID subunit 13	1	6.30823	6.07706	5.20571	5.52731	6.43813	6.1009	5.71703	5.56445	6.62205	6.1516	6.82325	6.09058	6.21342	7.32995	7.09006	6.74028
sp|O60271|JIP4_HUMAN	SPAG9	JIP4_HUMAN C-Jun-amino-terminal kinase-interacting protein 4	45	4.94954	5.07196	4.85727	5.11964	5.32361	5.71884	5.07653	5.45544	5.84604	6.46272	5.59882	6.33838	7.79928	8.04761	8.91785	9.41646
sp|Q9UPT6|JIP3_HUMAN	MAPK8IP3	JIP3_HUMAN C-Jun-amino-terminal kinase-interacting protein 3	5	5.21325	5.5495	4.94386	5.43464	5.38489	5.92533	5.37701	5.61442	5.55855	6.63459	5.95803	6.10295	7.12733	7.76021	8.35983	9.05561
sp|Q9Y3D9|RT23_HUMAN	MRPS23	RT23_HUMAN 28S ribosomal protein S23, mitochondrial	13	5.99479	5.6224	5.95263	6.15047	6.38955	6.1899	6.20019	6.11682	6.54335	6.35918	6.34372	6.2472	6.5943	6.23854	6.50113	6.55582
sp|Q8N9F7|GDPD1_HUMAN	GDPD1	GDPD1_HUMAN Glycerophosphodiester phosphodiesterase domain-containing protein 1	12	5.1927	5.61763	4.87956	4.94566	5.589	5.92594	5.23208	5.6426	5.69888	6.33606	5.64429	6.46178	7.44674	7.64869	8.37771	9.36069
sp|O96000|NDUBA_HUMAN	NDUFB10	NDUBA_HUMAN NADH dehydrogenase [ubiquinone] 1 beta subcomplex subunit 10	14	6.83084	6.44532	6.78556	6.49996	6.92732	6.02749	6.64092	6.44349	7.0895	6.14265	6.4407	6.3725	6.50486	5.41029	5.39865	4.03994
sp|Q96G03|PGM2_HUMAN	PGM2	PGM2_HUMAN Phosphoglucomutase-2	35	4.97592	5.1981	5.00708	5.11308	5.61965	6.25817	5.66559	6.06184	5.97954	6.6999	5.83602	6.21873	7.40822	7.67001	7.90668	8.38146
sp|Q6PCE3|PGM2L_HUMAN	PGM2L1	PGM2L_HUMAN Glucose 1,6-bisphosphate synthase	26	5.70642	4.27132	5.97849	5.89578	6.00887	6.0971	6.28345	6.33869	6.71051	6.79062	6.83939	6.80456	6.96864	6.50222	6.6221	6.18182
sp|P58335|ANTR2_HUMAN	ANTXR2	ANTR2_HUMAN Anthrax toxin receptor 2	4	5.2865	6.69499	5.75325	5.54234	5.79427	5.79445	5.4895	5.37189	6.15575	5.97701	6.21053	6.94008	7.3565	7.11548	6.81867	7.6988
sp|P98173|FAM3A_HUMAN	FAM3A	FAM3A_HUMAN Protein FAM3A	1	6.35151	6.91805	6.6155	6.04736	5.17405	6.15644	6.15426	6.36304	5.6225	8.01374	6.46391	5.63028	5.93379	5.43508	7.58288	5.53762
sp|Q9UDW1|QCR9_HUMAN	UQCR10	QCR9_HUMAN Cytochrome b-c1 complex subunit 9	2	6.89426	7.81468	7.2929	7.63211	6.81059	6.50848	6.09044	5.7902	7.81564	7.27897	7.08488	6.43819	4.14787	5.17597	4.07844	3.14638
sp|Q9UBV2|SE1L1_HUMAN	SEL1L	SE1L1_HUMAN Protein sel-1 homolog 1	17	6.46318	5.51701	6.46049	6.41614	7.0799	6.61201	6.95325	6.81365	6.54904	6.124	7.218	6.45393	5.79405	5.47314	5.17481	4.89739
sp|P46939-2|UTRO_HUMAN	UTRN	UTRO_HUMAN Isoform 2 of Utrophin	40	6.7014	9.15262	6.72884	6.36528	6.53243	6.4329	6.43793	6.16087	6.59183	6.15461	6.26302	6.29538	5.72965	5.17034	4.88459	4.39831
tr|H0Y337|H0Y337_HUMAN	UTRN	H0Y337_HUMAN Utrophin (Fragment)	1	6.27409	6.47397	7.38072	6.57452	5.30493	4.83798	6.64385	6.26037	5.91972	6.53106	8.05	5.62237	7.21982	4.13821	6.77137	5.99704
sp|Q9Y2H6|FND3A_HUMAN	FNDC3A	FND3A_HUMAN Fibronectin type-III domain-containing protein 3A	20	7.01759	7.63656	7.31395	7.08634	6.55857	6.21832	6.5476	6.33978	6.75894	6.14192	6.56138	6.2491	5.42506	5.16063	4.60691	4.37734
sp|Q9BQC3|DPH2_HUMAN	DPH2	DPH2_HUMAN Diphthamide biosynthesis protein 2	9	5.59493	5.93863	5.61355	5.33081	6.04746	6.0992	5.99084	5.98258	6.55827	6.41599	6.59853	6.57972	6.96474	6.62477	6.83311	6.82686
sp|O75937|DNJC8_HUMAN	DNAJC8	DNJC8_HUMAN DnaJ homolog subfamily C member 8	20	5.07256	5.27287	4.82802	5.22343	5.57682	5.97747	5.20859	5.56762	5.60694	6.3067	5.52354	6.17555	7.34737	7.81259	8.47134	10.0286
sp|Q8N6T3-2|ARFG1_HUMAN	ARFGAP1	ARFG1_HUMAN Isoform 2 of ADP-ribosylation factor GTPase-activating protein 1	13	4.91464	5.31661	5.0662	5.27753	5.61391	6.18557	5.64767	5.69201	6.06692	6.48815	6.12702	6.35396	7.59461	7.26281	8.2492	8.14318
sp|P55072|TERA_HUMAN	VCP	TERA_HUMAN Transitional endoplasmic reticulum ATPase	112	4.86101	5.21143	4.65991	4.85206	5.46193	5.99914	5.28138	5.77385	5.58761	6.40918	5.61939	6.26477	7.66446	7.86821	8.58916	9.89648
sp|Q5SXM2|SNPC4_HUMAN	SNAPC4	SNPC4_HUMAN snRNA-activating protein complex subunit 4	5	6.10016	5.75249	5.93828	6.0834	6.40555	6.42302	6.26134	6.36702	6.28545	6.25445	6.25106	6.27152	6.54804	6.21666	6.56009	6.28149
sp|O43929|ORC4_HUMAN	ORC4	ORC4_HUMAN Origin recognition complex subunit 4	12	8.7164	8.79237	8.61778	8.50245	6.70866	6.88482	7.33998	7.08016	6.23649	5.50887	6.2776	5.71902	3.43245	4.56339	2.75126	2.86827
sp|Q5VZK9|LR16A_HUMAN	LRRC16A	LR16A_HUMAN Leucine-rich repeat-containing protein 16A	27	7.09657	6.99695	7.41304	7.40848	6.9348	6.73951	6.99183	6.83542	6.80884	6.38776	6.81027	6.42454	4.55404	4.80363	4.04217	3.75214
sp|P05166-2|PCCB_HUMAN	PCCB	PCCB_HUMAN Isoform 2 of Propionyl-CoA carboxylase beta chain, mitochondrial	22	5.41149	5.61196	5.5026	5.28203	5.72384	5.92484	5.82713	5.89597	6.07475	6.47026	5.84182	6.30313	7.11515	7.18819	7.73473	8.09209
sp|O14545|TRAD1_HUMAN	TRAFD1	TRAD1_HUMAN TRAF-type zinc finger domain-containing protein 1	4	5.91724	6.64186	6.26279	6.14427	6.05026	5.95955	5.65103	5.73078	6.39221	6.15944	6.21475	6.24661	6.39464	6.52902	6.86485	6.84071
sp|Q14697-2|GANAB_HUMAN	GANAB	GANAB_HUMAN Isoform 2 of Neutral alpha-glucosidase AB	107	6.26902	5.86929	6.38438	6.24005	7.15845	6.73416	7.0246	6.82484	6.99264	6.69384	7.11017	6.54516	6.10186	5.25308	4.97556	3.8229
sp|P55786|PSA_HUMAN	NPEPPS	PSA_HUMAN Puromycin-sensitive aminopeptidase	123	5.01496	5.09009	4.88101	4.90725	5.65582	5.92535	5.44773	5.77147	5.85489	6.41064	5.71112	6.29385	7.6901	7.73185	8.38415	9.22971
sp|Q8TEQ8|PIGO_HUMAN	PIGO	PIGO_HUMAN GPI ethanolamine phosphate transferase 3	2	5.63433	5.59669	6.49903	5.39873	5.75876	5.86871	5.89801	6.81946	6.53192	6.31302	6.43661	7.07771	6.12044	7.405	6.32779	6.3138
sp|Q16875|F263_HUMAN	PFKFB3	F263_HUMAN 6-phosphofructo-2-kinase/fructose-2,6-bisphosphatase 3	17	6.87039	6.03549	7.1052	7.10783	6.98308	6.49174	6.99351	6.6554	6.64315	6.38433	6.74148	6.25985	5.69525	5.14411	4.68088	4.20833
sp|O60825|F262_HUMAN	PFKFB2	F262_HUMAN 6-phosphofructo-2-kinase/fructose-2,6-bisphosphatase 2	13	5.61027	5.88554	5.65233	5.71052	6.22811	5.93044	6.01446	5.78468	6.37725	6.56396	6.07225	6.17938	7.2088	6.60509	7.22714	6.94978
sp|P16118|F261_HUMAN	PFKFB1	F261_HUMAN 6-phosphofructo-2-kinase/fructose-2,6-bisphosphatase 1	1	5.96001	6.82595	6.04193	5.56015	5.60409	6.24458	6.59698	5.33766	7.02669	6.90646	7.38494	7.4323	6.79141	5.86695	5.68642	4.73349
sp|Q16877|F264_HUMAN	PFKFB4	F264_HUMAN 6-phosphofructo-2-kinase/fructose-2,6-bisphosphatase 4	4	5.27435	5.44688	5.15275	5.09753	5.88495	5.28335	5.59809	5.705	6.31162	5.81388	6.27468	6.32767	7.25898	12.8864	6.38788	5.29595
sp|Q92626|PXDN_HUMAN	PXDN	PXDN_HUMAN Peroxidasin homolog	3	5.32728	5.84925	5.27111	5.32283	4.98	5.45112	5.27556	5.41202	5.53756	5.76707	5.19832	6.06112	7.34527	8.48707	8.98114	9.73329
sp|Q6ZRP7|QSOX2_HUMAN	QSOX2	QSOX2_HUMAN Sulfhydryl oxidase 2	25	5.60148	5.28426	5.66751	5.71256	6.2502	6.17083	6.00959	6.08814	6.41143	6.55358	6.38022	6.52695	6.73781	6.6037	7.12568	6.87606
sp|Q5TA31|RN187_HUMAN	RNF187	RN187_HUMAN E3 ubiquitin-protein ligase RNF187	5	5.54352	5.5306	5.30034	5.77219	6.00752	6.18812	5.72112	6.70527	6.83497	6.13055	6.62878	6.18327	7.39965	6.33314	6.96832	6.75264
sp|P32004|L1CAM_HUMAN	L1CAM	L1CAM_HUMAN Neural cell adhesion molecule L1	12	4.9016	5.00696	5.04402	5.0378	5.52707	6.03743	5.39456	5.80456	5.82945	6.40803	5.81257	6.50912	7.56471	7.97041	8.13377	9.01794
sp|Q6PJG9|LRFN4_HUMAN	LRFN4	LRFN4_HUMAN Leucine-rich repeat and fibronectin type-III domain-containing protein 4	5	6.16077	6.24705	5.91902	6.26694	6.22882	5.3326	4.94389	4.93728	6.86226	6.33756	5.73906	6.69753	6.81539	6.83398	7.25879	7.41904
sp|Q9NRD5|PICK1_HUMAN	PICK1	PICK1_HUMAN PRKCA-binding protein	4	5.84898	5.72902	6.34152	6.08057	6.75535	6.49176	6.5862	6.57341	6.31023	6.37872	6.04942	6.60163	6.75649	6.2235	5.16577	6.10744
sp|Q9P2J9|PDP2_HUMAN	PDP2	PDP2_HUMAN [Pyruvate dehydrogenase [acetyl-transferring]]-phosphatase 2, mitochondrial	3	5.99858	7.48892	6.25799	6.40346	6.03389	5.28619	6.30345	5.43407	6.30884	7.10243	5.64342	6.74422	7.30644	4.974	6.47258	6.24152
sp|P61457|PHS_HUMAN	PCBD1	PHS_HUMAN Pterin-4-alpha-carbinolamine dehydratase	19	5.21054	5.5701	5.08538	5.41126	5.93606	6.21326	5.46223	6.0839	5.8283	6.41395	6.17041	6.77735	6.8752	7.10885	6.54711	9.30608
sp|Q9H0N5|PHS2_HUMAN	PCBD2	PHS2_HUMAN Pterin-4-alpha-carbinolamine dehydratase 2	4	5.13915	5.74353	4.80441	4.99465	5.7047	6.19715	5.43334	5.95491	5.75337	6.58742	5.4203	6.32077	7.76209	7.66598	7.09205	9.42618
sp|Q9H479|FN3K_HUMAN	FN3K	FN3K_HUMAN Fructosamine-3-kinase	4	5.27649	4.8842	4.84366	5.00263	5.52706	5.678	5.41815	5.60872	5.91692	6.23586	5.68316	6.39869	7.06416	7.83962	8.8854	9.7373
sp|Q9Y5L3|ENTP2_HUMAN	ENTPD2	ENTP2_HUMAN Ectonucleoside triphosphate diphosphohydrolase 2	4	5.3139	6.75576	4.75281	5.26784	6.57674	5.92409	5.80372	5.52507	6.04436	6.51358	6.06618	6.31328	6.66571	7.1814	7.47615	7.81941
sp|P25325|THTM_HUMAN	MPST	THTM_HUMAN 3-mercaptopyruvate sulfurtransferase	22	5.47168	5.57982	5.5984	5.45581	6.41078	5.99304	6.17148	6.13706	6.70256	6.54656	6.50381	6.32402	7.23188	6.36073	7.04961	6.46276
sp|Q96QD8|S38A2_HUMAN	SLC38A2	S38A2_HUMAN Sodium-coupled neutral amino acid transporter 2	8	5.87692	6.51712	5.97589	5.706	6.56309	6.70246	6.77434	6.76963	6.32224	6.54697	6.63948	6.55919	6.18035	5.87926	5.6432	5.34386
sp|Q15813|TBCE_HUMAN	TBCE	TBCE_HUMAN Tubulin-specific chaperone E	38	5.18454	4.91038	5.41868	5.23642	6.1535	5.82888	5.84663	5.86085	6.61279	6.58798	6.41304	6.2591	8.3297	7.03269	7.63052	6.69432
sp|Q9UKG1|DP13A_HUMAN	APPL1	DP13A_HUMAN DCC-interacting protein 13-alpha	24	5.08644	4.61789	5.03461	5.27555	5.57906	5.72993	5.47929	5.71823	5.67137	6.38949	5.89783	6.33488	7.53391	7.61665	8.79539	9.23948
sp|Q9H7X3|ZN696_HUMAN	ZNF696	ZN696_HUMAN Zinc finger protein 696	1	6.80789	6.55525	5.92547	6.55162	5.81557	5.67798	6.8695	6.42904	5.60324	6.34839	6.07137	6.0779	6.13013	6.21351	6.01016	6.91297
sp|Q9BQ24-2|ZFY21_HUMAN	ZFYVE21	ZFY21_HUMAN Isoform 2 of Zinc finger FYVE domain-containing protein 21	6	6.39842	7.09893	7.03367	6.48728	7.03747	6.52394	7.05354	6.49218	7.01395	6.50617	6.71525	6.86442	5.79694	4.81587	4.08265	4.07933
sp|Q13620|CUL4B_HUMAN	CUL4B	CUL4B_HUMAN Cullin-4B	61	7.68669	7.68497	7.85335	7.73898	6.98215	6.55161	7.11257	6.81146	6.77483	6.22887	6.65768	6.14486	4.31899	4.56845	3.85152	3.033
sp|Q13619|CUL4A_HUMAN	CUL4A	CUL4A_HUMAN Cullin-4A	26	8.33989	7.51938	8.59325	8.4891	6.89476	6.57371	7.31988	6.80087	6.25436	5.87827	6.42008	6.10894	4.02547	4.73169	3.21345	2.83689
sp|Q9BTV5|FSD1_HUMAN	FSD1	FSD1_HUMAN Fibronectin type III and SPRY domain-containing protein 1	10	6.592	6.96457	6.54928	6.28269	7.08384	6.81456	6.98534	6.54255	7.00542	6.49291	6.82582	6.72584	6.1335	5.05024	4.5433	3.40813
sp|Q96CD2|COAC_HUMAN	PPCDC	COAC_HUMAN Phosphopantothenoylcysteine decarboxylase	5	5.03345	5.42177	5.38385	5.28949	5.41414	5.75186	5.85952	6.29567	5.98119	6.19222	6.43122	6.51292	7.31538	7.17528	7.10953	8.83252
sp|P84103|SRSF3_HUMAN	SRSF3	SRSF3_HUMAN Serine/arginine-rich splicing factor 3	5	9.41898	10.4836	9.05634	9.45131	5.70127	5.19534	5.956	5.67646	4.80506	4.51956	5.31428	5.1159	3.77124	6.695	4.22294	4.61672
sp|Q16629|SRSF7_HUMAN	SRSF7	SRSF7_HUMAN Serine/arginine-rich splicing factor 7	5	8.39692	9.39729	8.04942	8.57315	6.25947	5.33301	5.79618	5.68992	5.7646	5.16543	5.23888	4.84074	4.57531	6.66149	4.95201	5.30618
sp|O75191|XYLB_HUMAN	XYLB	XYLB_HUMAN Xylulose kinase	4	5.59741	6.21669	6.60317	5.82425	7.06618	5.7703	6.66876	6.9232	7.27919	6.0756	6.445	7.05501	5.89991	6.22871	5.33731	5.00931
sp|Q15738|NSDHL_HUMAN	NSDHL	NSDHL_HUMAN Sterol-4-alpha-carboxylate 3-dehydrogenase, decarboxylating	21	7.69128	7.58953	7.59844	7.60352	6.85695	6.48468	7.04644	6.84294	6.6869	6.07544	6.65462	6.0096	4.77659	4.84432	3.95086	3.2879
sp|P49336|CDK8_HUMAN	CDK8	CDK8_HUMAN Cyclin-dependent kinase 8	10	6.61958	5.9877	6.56816	6.73032	6.84354	6.14289	6.61577	6.31899	7.02045	6.39359	6.89507	6.25597	6.5982	5.61478	5.32253	4.07247
sp|P17987|TCPA_HUMAN	TCP1	TCPA_HUMAN T-complex protein 1 subunit alpha	154	6.09759	5.97427	5.94276	5.9087	6.79008	6.54233	6.69873	6.57798	6.89483	6.69677	6.81942	6.49911	6.6765	5.60413	5.60162	4.67516
sp|Q00341|VIGLN_HUMAN	HDLBP	VIGLN_HUMAN Vigilin	80	7.23817	7.01638	7.23774	7.09285	6.95715	6.63231	7.14693	6.72261	6.82682	6.34111	6.79119	6.33784	5.2706	4.86983	4.20916	3.30933
sp|Q92966|SNPC3_HUMAN	SNAPC3	SNPC3_HUMAN snRNA-activating protein complex subunit 3	3	5.61669	5.88477	6.4459	5.86393	6.50694	6.35867	5.85018	6.21033	6.39437	6.16261	6.17572	6.62755	6.52961	6.71953	6.27071	6.3825
sp|Q9UIJ7|KAD3_HUMAN	AK3	KAD3_HUMAN GTP:AMP phosphotransferase AK3, mitochondrial	21	5.20039	4.5745	5.02787	5.04822	5.91806	6.00547	5.65009	5.92272	6.28941	6.43278	6.02032	6.30609	7.91613	7.42144	7.98955	8.27696
sp|Q9Y4I1-3|MYO5A_HUMAN	MYO5A	MYO5A_HUMAN Isoform 3 of Unconventional myosin-Va	10	7.7286	9.38207	8.03358	7.93796	6.38022	5.39273	6.01488	5.8744	5.78638	5.18823	6.15791	5.61575	4.7129	6.51688	4.88882	4.3887
sp|Q9NQX4|MYO5C_HUMAN	MYO5C	MYO5C_HUMAN Unconventional myosin-Vc	9	6.73456	6.55512	6.86518	6.77051	5.80771	5.46224	6.00366	5.86291	5.25044	5.37741	5.90185	5.35141	6.15985	7.5349	6.89331	7.46894
sp|Q9ULV0|MYO5B_HUMAN	MYO5B	MYO5B_HUMAN Unconventional myosin-Vb	6	7.57926	7.31891	8.34657	7.55606	6.3561	5.90449	6.69535	6.60635	6.40503	5.92029	6.16409	5.83346	4.94587	5.5566	4.42781	4.38376
sp|Q9HAB8|PPCS_HUMAN	PPCS	PPCS_HUMAN Phosphopantothenate--cysteine ligase	12	6.3751	6.89652	6.2257	6.06019	6.85823	6.21991	6.62769	6.41285	7.40164	6.49578	6.6817	6.58167	6.52015	5.72014	4.85829	4.06445
sp|P30566|PUR8_HUMAN	ADSL	PUR8_HUMAN Adenylosuccinate lyase	36	4.97203	4.6242	4.92566	4.90301	5.66815	6.07773	5.5252	5.95022	5.80186	6.23923	5.96301	6.43052	7.60207	7.60983	8.58313	9.12416
sp|Q7Z2K6|ERMP1_HUMAN	ERMP1	ERMP1_HUMAN Endoplasmic reticulum metallopeptidase 1	18	5.28385	5.47226	5.19072	5.19294	5.66996	6.01182	5.42892	5.62938	6.31467	6.45928	5.49501	6.32628	7.6685	7.32098	7.98645	8.54897
sp|Q15029|U5S1_HUMAN	EFTUD2	U5S1_HUMAN 116 kDa U5 small nuclear ribonucleoprotein component	75	5.48354	6.76763	5.26104	5.35792	5.28416	5.94885	5.17553	5.54059	5.20321	5.9473	5.55915	5.98667	7.17416	7.74562	8.37843	9.18621
sp|P13639|EF2_HUMAN	EEF2	EF2_HUMAN Elongation factor 2	316	5.84169	5.64812	5.91137	5.82277	6.693	6.43006	6.30055	6.7295	6.60615	6.96983	6.62245	6.81212	6.81784	5.83753	5.98312	4.9739
sp|Q16656|NRF1_HUMAN	NRF1	NRF1_HUMAN Nuclear respiratory factor 1	4	7.74363	7.98807	7.75247	7.5001	7.20279	6.85484	7.07528	6.54357	6.63569	6.32371	6.04089	6.24156	4.52451	4.55755	3.67412	3.34119
sp|Q9Y4P3|TBL2_HUMAN	TBL2	TBL2_HUMAN Transducin beta-like protein 2	12	8.27057	7.77606	8.33372	8.20767	6.755	6.52056	6.70518	6.57605	6.14641	5.80587	6.02353	5.68084	4.50012	4.99375	4.11469	3.59
sp|P25205|MCM3_HUMAN	MCM3	MCM3_HUMAN DNA replication licensing factor MCM3	64	7.59787	6.97246	7.56788	7.50006	7.17936	6.76893	7.23608	6.79025	6.47377	5.97442	6.87132	6.16133	4.57644	4.71672	4.10712	3.50598
sp|P05388|RLA0_HUMAN	RPLP0	RLA0_HUMAN 60S acidic ribosomal protein P0	58	6.82696	6.83336	6.6365	6.60158	6.10834	6.06017	6.06163	5.91802	5.78198	5.48419	5.89614	5.57538	5.9157	6.38685	6.94999	6.96321
sp|P09211|GSTP1_HUMAN	GSTP1	GSTP1_HUMAN Glutathione S-transferase P	88	5.20028	5.21762	5.12561	5.02607	6.11378	5.95997	5.73171	5.92844	6.47832	6.48145	5.97124	6.41135	7.86631	7.26154	7.82312	7.40319
sp|Q96MX0|CKLF3_HUMAN	CMTM3	CKLF3_HUMAN CKLF-like MARVEL transmembrane domain-containing protein 3	2	5.71269	5.52476	6.01819	6.79964	5.99002	7.17462	7.20739	6.61843	5.28548	6.40382	7.34197	6.38761	6.45896	6.29964	5.8933	4.88348
sp|Q9H7Z7|PGES2_HUMAN	PTGES2	PGES2_HUMAN Prostaglandin E synthase 2	27	6.93382	5.9277	7.00954	6.78183	7.35431	6.66284	7.47055	6.96341	7.1885	6.64216	7.38206	6.40449	5.58859	4.73645	4.02995	2.92382
sp|O15294|OGT1_HUMAN	OGT	OGT1_HUMAN UDP-N-acetylglucosamine--peptide N-acetylglucosaminyltransferase 110 kDa subunit	40	6.7022	6.65827	6.77382	6.49632	7.09063	6.59849	7.05668	6.57313	6.81277	6.41753	7.06917	6.41196	5.42052	4.93739	4.85672	4.12439
sp|Q9NXG2|THUM1_HUMAN	THUMPD1	THUM1_HUMAN THUMP domain-containing protein 1	21	6.03051	5.66579	6.26112	6.21045	6.6747	6.47585	6.63901	6.39402	6.81329	6.53826	6.52048	6.4707	6.41567	5.86198	5.72374	5.30442
sp|Q9HB90|RRAGC_HUMAN	RRAGC	RRAGC_HUMAN Ras-related GTP-binding protein C	12	5.00637	5.23256	4.77804	4.92755	5.60858	5.98537	5.3858	5.47456	6.10782	6.52226	5.84533	6.45943	7.40843	7.91975	8.16377	9.17437
sp|P29372|3MG_HUMAN	MPG	3MG_HUMAN DNA-3-methyladenine glycosylase	5	5.82439	6.64997	5.98651	5.42779	6.16529	6.57058	7.18314	6.75254	6.2561	6.55981	6.4447	6.51478	6.7427	6.61219	5.53892	4.77059
sp|Q92729|PTPRU_HUMAN	PTPRU	PTPRU_HUMAN Receptor-type tyrosine-protein phosphatase U	3	6.71383	6.74542	5.62853	6.25478	6.19865	6.11351	6.12541	5.80891	6.69928	6.13964	6.2526	5.85422	6.33736	6.15786	7.09856	5.87142
sp|Q2M296-3|MTHSD_HUMAN	MTHFSD	MTHSD_HUMAN Isoform 3 of Methenyltetrahydrofolate synthase domain-containing protein	2	8.65073	5.27858	9.08497	8.89546	7.38794	6.33764	7.7778	6.54092	6.72569	6.35079	6.6176	5.22911	3.10717	5.36239	3.8665	2.7867
sp|P49207|RL34_HUMAN	RPL34	RL34_HUMAN 60S ribosomal protein L34	18	7.02523	6.77283	6.85006	6.95219	6.15604	6.1046	6.37266	5.93539	5.35919	5.24495	6.05795	5.29699	5.60386	6.21492	7.04263	7.01051
sp|Q9BTY7|F203A_HUMAN	FAM203A	F203A_HUMAN Protein FAM203A	10	6.73543	7.06522	7.14411	6.86127	7.01439	6.81961	7.41996	7.13258	6.85118	6.43835	7.07919	6.25505	5.15978	4.65697	3.56027	3.80665
sp|Q96JM3|CHAP1_HUMAN	CHAMP1	CHAP1_HUMAN Chromosome alignment-maintaining phosphoprotein 1	19	5.30615	5.85026	5.31452	5.62568	5.77205	5.91622	5.5724	5.86393	6.13901	6.45449	5.88193	6.73062	7.25788	7.16589	7.34875	7.80021
sp|Q9H6V9-2|CB043_HUMAN	C2orf43	CB043_HUMAN Isoform 2 of UPF0554 protein C2orf43	9	7.28568	6.95504	7.87639	7.89332	6.71406	6.45723	7.09679	6.60942	6.80273	6.34108	7.2418	6.50336	4.59917	4.61595	3.90095	3.10703
sp|Q96L50|LLR1_HUMAN	LRR1	LLR1_HUMAN Leucine-rich repeat protein 1	4	7.06694	6.97267	7.68286	7.29607	7.10362	6.75439	6.77034	6.31555	6.86527	6.49906	6.62334	6.3459	4.87459	4.70685	4.55029	3.57225
sp|Q8IV08|PLD3_HUMAN	PLD3	PLD3_HUMAN Phospholipase D3	13	5.61146	5.76112	5.57111	5.27565	6.7164	6.4477	6.23139	6.33584	6.70536	6.65831	6.54808	6.31134	6.89604	6.6079	6.28587	6.03642
sp|P36776|LONM_HUMAN	LONP1	LONM_HUMAN Lon protease homolog, mitochondrial	52	7.07903	7.22796	7.13903	6.84754	6.93394	6.32738	6.98354	6.45144	6.87396	6.14528	6.83328	6.02182	5.73939	5.0268	4.8176	3.55201
sp|Q8NBQ5|DHB11_HUMAN	HSD17B11	DHB11_HUMAN Estradiol 17-beta-dehydrogenase 11	8	8.04082	7.11867	7.63514	7.87949	7.44209	6.90808	7.14703	6.97586	6.55545	6.23062	6.39063	5.78827	4.2089	4.79662	3.80338	3.07893
sp|Q14690|RRP5_HUMAN	PDCD11	RRP5_HUMAN Protein RRP5 homolog	24	9.83381	10.3506	10.2506	10.1001	5.84002	5.31127	5.92583	5.48954	5.18437	4.93439	4.5698	4.41756	3.79672	6.78428	3.97307	3.23801
sp|Q86UD0|SAPC2_HUMAN	SAPCD2	SAPC2_HUMAN Suppressor APC domain-containing protein 2	8	6.06777	6.46475	5.82098	5.97039	6.33069	6.32614	5.9318	6.44985	6.8741	6.77587	6.43789	6.67696	6.4092	5.93069	5.75893	5.77399
sp|O15320-6|CTGE5_HUMAN	CTAGE5	CTGE5_HUMAN Isoform 7 of cTAGE family member 5	26	5.17402	5.71365	5.09908	5.24895	5.57438	5.90678	5.48266	5.64837	5.92234	6.5719	5.8537	6.49653	7.30351	7.35596	7.89047	8.75773
sp|Q96S44|PRPK_HUMAN	TP53RK	PRPK_HUMAN TP53-regulating kinase	9	8.55792	8.35837	8.63065	8.49382	7.00658	6.23697	7.00558	6.67081	6.10924	5.7211	6.17705	5.72403	3.84905	4.69051	3.50434	3.26399
sp|Q6NXG1|ESRP1_HUMAN	ESRP1	ESRP1_HUMAN Epithelial splicing regulatory protein 1	19	7.1162	6.10873	7.39657	7.23254	6.88876	6.46093	7.32513	6.61474	7.19527	6.69091	7.01951	6.41349	5.13313	5.02413	4.10337	3.27658
sp|Q9H6T0|ESRP2_HUMAN	ESRP2	ESRP2_HUMAN Epithelial splicing regulatory protein 2	6	7.72432	7.17822	7.5365	7.40376	6.54661	6.49645	7.12271	6.48689	6.75123	6.22534	6.87884	6.56137	4.81431	4.74578	3.92331	3.60436
sp|P39023|RL3_HUMAN	RPL3	RL3_HUMAN 60S ribosomal protein L3	53	7.29127	6.84302	6.9651	6.95639	6.18658	5.89246	6.08459	5.85813	5.68386	5.21964	5.85031	5.71944	5.62156	6.03585	6.74234	7.04946
sp|O95983|MBD3_HUMAN	MBD3	MBD3_HUMAN Methyl-CpG-binding domain protein 3	8	6.52367	7.13961	6.3366	6.15456	6.5849	6.40413	6.51731	6.32624	6.53241	6.40624	6.56398	6.38884	5.82778	5.3729	5.83671	5.08409
sp|O95158|NXPH4_HUMAN	NXPH4	NXPH4_HUMAN Neurexophilin-4	1	6.4909	13.8388	6.88816	7.50224	6.06965	5.56023	5.15204	6.33513	4.70274	6.2413	6.91506	5.48829	3.52145	5.54372	5.41377	4.33653
sp|O95573|ACSL3_HUMAN	ACSL3	ACSL3_HUMAN Long-chain-fatty-acid--CoA ligase 3	33	8.3162	7.4618	8.57048	8.71981	6.72585	6.36558	7.17603	6.64976	6.40172	5.90351	6.50042	5.88663	3.94882	4.74505	3.55417	3.07417
sp|O60488|ACSL4_HUMAN	ACSL4	ACSL4_HUMAN Long-chain-fatty-acid--CoA ligase 4	38	7.21131	6.74614	7.54311	7.37583	6.97804	6.34856	7.28305	6.80672	6.9917	6.4006	6.94891	6.18981	4.87123	4.93515	4.06824	3.30161
tr|D6RD96|D6RD96_HUMAN	ACSL4	D6RD96_HUMAN Long-chain-fatty-acid--CoA ligase 4 (Fragment)	1	7.06578	22.2375	5.94937	4.06878	5.47354	5.09455	4.14307	3.45764	7.18814	4.99838	4.97542	4.99656	6.83957	4.7477	5.00189	3.76208
sp|P51809|VAMP7_HUMAN	VAMP7	VAMP7_HUMAN Vesicle-associated membrane protein 7	10	5.97165	5.97312	6.11974	6.20663	6.8405	6.49112	6.44047	6.39535	7.04685	6.66083	6.64271	6.52816	6.26618	5.82285	5.50765	5.08618
tr|G3V325|G3V325_HUMAN	ATP5J2-PTCD1	G3V325_HUMAN Pentatricopeptide repeat-containing protein 1, mitochondrial	13	8.16614	7.50574	8.35453	8.52525	6.8611	6.50893	7.22031	6.50016	6.1903	6.12788	6.40718	5.7643	4.23984	4.91369	3.5577	3.15694
sp|Q9UMZ2-3|SYNRG_HUMAN	SYNRG	SYNRG_HUMAN Isoform 2 of Synergin gamma	21	6.02042	6.54903	6.58067	6.57392	6.19861	6.48435	6.47351	6.52017	6.11042	6.30096	6.54894	6.58625	5.46503	5.98646	5.5751	6.02615
sp|P46060|RAGP1_HUMAN	RANGAP1	RAGP1_HUMAN Ran GTPase-activating protein 1	43	7.4452	6.67413	7.46007	7.2171	7.33046	6.78436	7.20209	7.03405	6.98814	6.59021	6.75556	6.51243	4.5218	4.53579	3.79242	3.1562
sp|Q330K2|NDUF6_HUMAN	NDUFAF6	NDUF6_HUMAN NADH dehydrogenase (ubiquinone) complex I, assembly factor 6	4	8.09754	7.77742	8.43318	8.53523	6.69226	6.55782	7.15758	6.2451	6.39373	5.96302	6.04698	5.83436	3.81509	5.13331	3.56005	3.75733
sp|Q96J42|TXD15_HUMAN	TXNDC15	TXD15_HUMAN Thioredoxin domain-containing protein 15	4	4.95223	4.96848	5.12243	4.79612	5.73295	6.19326	5.35503	5.86381	6.01178	6.93603	5.87964	6.46766	7.25134	7.73181	7.55031	9.18712
sp|Q9UQB8|BAIP2_HUMAN	BAIAP2	BAIP2_HUMAN Brain-specific angiogenesis inhibitor 1-associated protein 2	38	5.52571	5.58776	5.54653	5.37632	6.05325	5.95583	5.78257	5.69963	5.95859	5.86841	6.27161	5.90569	7.21802	6.55478	8.34001	8.35529
sp|Q9UQB8-6|BAIP2_HUMAN	BAIAP2	BAIP2_HUMAN Isoform 6 of Brain-specific angiogenesis inhibitor 1-associated protein 2	1	5.15882	5.88852	5.16609	5.42867	5.83353	5.39998	5.61427	5.65009	5.32354	6.53906	6.19113	7.09813	6.86143	6.73878	8.22585	8.8821
sp|Q9UQB8-5|BAIP2_HUMAN	BAIAP2	BAIP2_HUMAN Isoform 5 of Brain-specific angiogenesis inhibitor 1-associated protein 2	1	5.61139	4.59496	5.87023	5.72093	5.8128	5.77623	5.97	5.82545	6.07307	6.70978	5.30371	6.30953	6.63914	6.61742	9.33878	7.82658
sp|Q8IZJ1|UNC5B_HUMAN	UNC5B	UNC5B_HUMAN Netrin receptor UNC5B	2	6.84219	6.0616	6.03569	6.23614	6.02144	6.02689	6.0828	5.55391	5.74391	6.29794	6.08277	5.69711	6.21441	6.76411	7.56149	6.77759
sp|Q02252|MMSA_HUMAN	ALDH6A1	MMSA_HUMAN Methylmalonate-semialdehyde dehydrogenase [acylating], mitochondrial	19	5.7905	5.32173	6.34918	6.01485	6.64177	6.25955	6.67773	6.35718	6.66648	6.49508	6.84987	6.47564	6.64538	5.92181	6.09282	5.44043
sp|P35270|SPRE_HUMAN	SPR	SPRE_HUMAN Sepiapterin reductase	21	6.59477	6.17161	6.66885	6.23574	7.67953	6.53354	7.4905	7.02386	7.57713	6.37096	7.40381	6.75475	5.62088	4.48678	4.08892	3.29838
sp|P13807|GYS1_HUMAN	GYS1	GYS1_HUMAN Glycogen [starch] synthase, muscle	31	5.58575	5.57342	5.66301	5.84523	6.42334	6.41813	6.6265	6.24308	6.80227	6.897	6.80516	6.69491	7.00314	5.95805	6.16481	5.2962
sp|Q96S19|CP013_HUMAN	C16orf13	CP013_HUMAN UPF0585 protein C16orf13	7	5.35784	6.04794	5.79131	6.08004	6.64607	6.88222	6.49169	6.60988	5.96583	6.91164	6.59628	7.25707	7.42239	5.7309	4.42806	5.78085
sp|Q7Z4S6-4|KI21A_HUMAN	KIF21A	KI21A_HUMAN Isoform 4 of Kinesin-like protein KIF21A	26	7.96005	7.06991	8.19254	8.41424	7.10975	6.58837	7.09606	6.51296	6.3766	5.73091	6.56954	6.04226	4.19364	4.77325	3.92786	3.44208
sp|O75037|KI21B_HUMAN	KIF21B	KI21B_HUMAN Kinesin-like protein KIF21B	3	3.0617	3.38832	2.93385	2.8356	53.4545	2.97479	1.38384	3.23064	3.31884	3.06107	2.58284	2.85836	4.0389	3.43314	3.75919	3.68439
sp|Q13618|CUL3_HUMAN	CUL3	CUL3_HUMAN Cullin-3	48	6.17445	6.36064	6.41991	6.2102	6.76275	7.03924	6.89156	6.87443	6.99017	7.07311	7.27089	6.8859	5.94769	5.19144	4.63013	3.27748
sp|O43813|LANC1_HUMAN	LANCL1	LANC1_HUMAN LanC-like protein 1	14	5.30641	5.93624	5.37708	5.35588	5.86234	6.2289	5.72025	6.11738	6.07224	6.38979	6.17088	6.64078	7.07734	6.8277	7.18238	7.73441
sp|Q8IWD4|CC117_HUMAN	CCDC117	CC117_HUMAN Coiled-coil domain-containing protein 117	11	5.59219	5.96986	5.63483	5.90518	5.558	6.07481	5.37359	5.81681	6.03122	6.30383	5.71011	6.38591	7.0623	7.16541	7.06178	8.35417
sp|O95372|LYPA2_HUMAN	LYPLA2	LYPA2_HUMAN Acyl-protein thioesterase 2	13	5.18592	5.01959	5.25727	6.1992	8.04649	8.37516	8.59768	7.95145	5.453	7.42454	8.49392	7.54211	6.26305	3.64613	2.96384	3.58064
sp|Q8WTS6|SETD7_HUMAN	SETD7	SETD7_HUMAN Histone-lysine N-methyltransferase SETD7	17	5.11949	5.20325	4.97775	5.01727	5.55067	5.73425	5.21797	5.47489	6.06151	6.42312	5.53023	6.33225	7.72482	7.68845	8.64989	9.29419
sp|Q8N392|RHG18_HUMAN	ARHGAP18	RHG18_HUMAN Rho GTPase-activating protein 18	37	7.04698	7.54227	7.03987	6.91541	7.08742	6.68163	7.10811	6.85342	7.50793	6.77358	6.97878	6.88917	4.54899	4.48517	3.63555	2.90573
sp|Q6P3X3|TTC27_HUMAN	TTC27	TTC27_HUMAN Tetratricopeptide repeat protein 27	15	9.2012	9.20363	8.91623	9.12195	6.82539	6.62448	7.20032	6.84951	6.14466	5.52971	6.20628	5.80749	3.16578	4.32908	2.62102	2.25328
sp|Q6ZNJ1|NBEL2_HUMAN	NBEAL2	NBEL2_HUMAN Neurobeachin-like protein 2	17	8.08703	7.71625	8.41676	8.49201	6.53973	6.42924	7.16002	6.73819	6.19633	6.18575	6.23406	6.05944	3.99392	4.91135	3.61092	3.22899
sp|P10588|NR2F6_HUMAN	NR2F6	NR2F6_HUMAN Nuclear receptor subfamily 2 group F member 6	3	7.21662	8.34918	7.27408	7.39549	8.01405	6.95827	7.22806	6.08882	5.7001	5.93529	7.19009	6.26494	4.22218	4.6839	4.65781	2.82114
sp|P38432|COIL_HUMAN	COIL	COIL_HUMAN Coilin	9	6.42607	7.06048	6.67711	6.29831	6.34718	6.63555	6.58585	5.96469	6.23874	6.40452	6.22947	6.12337	5.74298	6.08429	5.82056	5.36084
sp|Q12770|SCAP_HUMAN	SCAP	SCAP_HUMAN Sterol regulatory element-binding protein cleavage-activating protein	1	7.97001	8.15171	6.74568	7.31918	7.05675	6.33214	6.60641	5.97994	6.20962	5.75171	6.21458	6.32644	5.47736	5.02004	4.0622	4.77624
sp|Q96SB8-2|SMC6_HUMAN	SMC6	SMC6_HUMAN Isoform 2 of Structural maintenance of chromosomes protein 6	6	9.57992	9.89128	9.57136	9.08288	6.9649	6.17995	6.6335	5.76494	5.90159	4.72244	5.57897	4.90164	3.52168	4.58383	3.92765	3.19345
sp|Q9H814|PHAX_HUMAN	PHAX	PHAX_HUMAN Phosphorylated adapter RNA export protein	17	5.68687	5.87088	5.60348	5.77288	5.64504	5.85201	5.55873	5.66686	6.12348	6.16804	5.94178	6.5004	7.15198	6.8899	7.44239	8.12529
sp|P15586|GNS_HUMAN	GNS	GNS_HUMAN N-acetylglucosamine-6-sulfatase	17	4.84009	7.49625	4.71663	4.62046	5.38927	6.1208	5.4627	5.78005	5.45515	6.16314	5.97656	5.97214	7.28166	7.35725	8.28096	9.0869
sp|O00115|DNS2A_HUMAN	DNASE2	DNS2A_HUMAN Deoxyribonuclease-2-alpha	7	5.14549	4.67287	4.90903	5.0537	5.61221	6.16197	5.52216	5.7989	5.87687	6.60602	5.99559	6.60737	7.21747	7.3861	7.89804	9.53623
sp|Q9ULJ6|ZMIZ1_HUMAN	ZMIZ1	ZMIZ1_HUMAN Zinc finger MIZ domain-containing protein 1	8	5.07904	5.70601	4.85014	5.00198	5.49062	5.7259	5.22365	5.75076	5.59254	6.24979	5.53343	6.37205	7.68291	7.94175	8.17396	9.62548
sp|Q8NF64|ZMIZ2_HUMAN	ZMIZ2	ZMIZ2_HUMAN Zinc finger MIZ domain-containing protein 2	9	5.01933	5.84685	4.83011	5.50643	5.53808	5.60992	5.07634	5.67243	5.88886	6.2302	5.73722	6.04297	7.17377	7.57476	8.51166	9.74108
sp|Q9BU89|DOHH_HUMAN	DOHH	DOHH_HUMAN Deoxyhypusine hydroxylase	11	5.46196	6.98209	5.50566	5.0396	7.14823	6.95505	6.42046	6.29015	7.08902	6.4707	6.17576	7.25029	6.33005	5.62836	4.62582	6.6268
sp|P30048|PRDX3_HUMAN	PRDX3	PRDX3_HUMAN Thioredoxin-dependent peroxide reductase, mitochondrial	50	4.86115	5.1614	4.68783	4.91425	5.67358	5.97368	5.28229	5.89672	5.76704	6.187	5.61297	6.28231	7.70232	7.94044	8.13365	9.92339
sp|P13010|XRCC5_HUMAN	XRCC5	XRCC5_HUMAN X-ray repair cross-complementing protein 5	105	7.87863	7.76139	7.95913	7.91736	7.1319	6.82835	7.42117	7.07484	6.53916	6.14448	7.02578	6.11115	3.90843	4.37189	3.24031	2.68602
sp|A5YKK6|CNOT1_HUMAN	CNOT1	CNOT1_HUMAN CCR4-NOT transcription complex subunit 1	83	7.79992	7.42355	7.88972	7.90402	7.02081	6.62535	7.02642	6.7374	6.52643	6.16447	6.63826	6.07566	4.33913	4.69295	3.7876	3.34831
sp|Q96D53|ADCK4_HUMAN	ADCK4	ADCK4_HUMAN Uncharacterized aarF domain-containing protein kinase 4	7	7.82347	5.75024	8.16051	8.58973	6.69428	6.58388	7.47553	7.13744	6.07411	5.86062	6.60808	5.97188	4.02111	5.31271	3.97841	3.95799
sp|Q04323-2|UBXN1_HUMAN	UBXN1	UBXN1_HUMAN Isoform 2 of UBX domain-containing protein 1	12	4.96011	5.38194	4.61344	4.83564	5.66612	7.02744	6.40076	6.70146	5.35379	6.3853	6.50219	6.02477	6.81377	7.10597	7.7162	8.5111
sp|Q7Z333-4|SETX_HUMAN	SETX	SETX_HUMAN Isoform 4 of Probable helicase senataxin	23	8.91296	9.51156	8.78584	9.14686	6.06479	5.97285	6.43655	6.45658	5.56134	5.33354	5.80152	5.57614	3.64984	5.63972	3.58794	3.56196
sp|Q8IWI9-4|MGAP_HUMAN	MGA	MGAP_HUMAN Isoform 4 of MAX gene-associated protein	11	6.62067	6.73889	6.89721	6.71768	6.3332	6.33752	6.205	6.01089	6.38943	6.20753	6.24634	6.44433	5.75991	6.10272	5.6385	5.35019
sp|Q8WVM0|TFB1M_HUMAN	TFB1M	TFB1M_HUMAN Dimethyladenosine transferase 1, mitochondrial	8	8.7382	9.31671	8.84787	8.96163	6.39781	6.47583	6.72354	6.09178	6.08043	5.55097	6.44914	5.19629	3.7851	4.70853	3.40279	3.27338
sp|P10768|ESTD_HUMAN	ESD	ESTD_HUMAN S-formylglutathione hydrolase	32	4.90218	4.9158	4.77883	4.84211	5.69122	6.21769	5.62424	5.93911	6.00431	6.76158	6.10303	6.47901	7.55464	7.42653	8.21289	8.54682
sp|Q96JQ2|CLMN_HUMAN	CLMN	CLMN_HUMAN Calmin	12	7.23892	7.44019	7.35286	7.52643	6.60121	6.43561	6.79475	6.59955	6.42364	6.03921	6.69431	6.67029	4.82095	5.15451	4.31549	3.89208
sp|P43378|PTN9_HUMAN	PTPN9	PTN9_HUMAN Tyrosine-protein phosphatase non-receptor type 9	8	6.99821	6.67	7.55503	8.6533	6.6804	6.24835	6.98721	6.46661	6.46764	6.52544	6.5419	6.08043	4.88657	5.11568	4.49853	3.62469
sp|Q16670|ZSC26_HUMAN	ZSCAN26	ZSC26_HUMAN Zinc finger and SCAN domain-containing protein 26	2	7.2244	5.68783	6.99827	7.53484	5.96395	6.06666	6.10419	5.76839	5.85292	6.13777	5.79003	6.53852	5.41745	6.59038	5.90607	6.41833
sp|Q9Y624|JAM1_HUMAN	F11R	JAM1_HUMAN Junctional adhesion molecule A	16	5.00886	4.16946	4.74484	4.91891	5.49166	5.79485	5.21475	5.64181	5.68243	6.38628	5.71961	6.20584	7.60392	8.26502	9.14256	10.0092
sp|P61619|S61A1_HUMAN	SEC61A1	S61A1_HUMAN Protein transport protein Sec61 subunit alpha isoform 1	13	8.15549	7.41528	8.02047	7.88391	6.87443	6.66538	7.00024	6.62215	6.52831	6.13705	6.2295	6.05188	4.58844	5.00494	3.66511	3.15741
sp|Q14839-2|CHD4_HUMAN	CHD4	CHD4_HUMAN Isoform 2 of Chromodomain-helicase-DNA-binding protein 4	58	7.61254	7.47003	7.66437	7.75833	7.02251	6.59322	7.20281	6.77851	6.38772	6.04807	6.73702	6.02192	4.46109	4.70981	4.10924	3.42283
sp|Q12873-3|CHD3_HUMAN	CHD3	CHD3_HUMAN Isoform 3 of Chromodomain-helicase-DNA-binding protein 3	23	7.85294	7.44483	7.80991	7.60886	6.85916	6.54102	7.27622	6.77053	6.45284	5.9254	6.32934	5.90966	4.66249	5.04381	4.12735	3.38563
sp|Q15776|ZKSC8_HUMAN	ZKSCAN8	ZKSC8_HUMAN Zinc finger protein with KRAB and SCAN domains 8	2	9.24324	8.84272	8.24552	8.26242	6.49419	5.23461	6.33192	6.65988	5.0016	5.19825	6.25201	4.6099	3.71813	6.71851	4.00424	5.18286
sp|Q9H5H4|ZN768_HUMAN	ZNF768	ZN768_HUMAN Zinc finger protein 768	2	5.99681	6.76057	6.41578	5.84396	5.76267	6.00319	5.79843	5.37902	5.7812	4.89124	5.80871	5.5977	7.815	6.4344	7.62656	8.08475
sp|P17029|ZKSC1_HUMAN	ZKSCAN1	ZKSC1_HUMAN Zinc finger protein with KRAB and SCAN domains 1	6	7.28924	7.66765	7.34407	7.44994	6.66984	6.11599	6.02573	6.26382	5.91206	5.4623	5.85587	6.1003	5.40856	6.00018	5.05713	5.37732
sp|Q53F19|CQ085_HUMAN	C17orf85	CQ085_HUMAN Uncharacterized protein C17orf85	2	8.57888	8.86104	8.36241	7.61	6.70979	5.78587	6.59065	6.04312	5.81221	5.3856	6.19509	6.22345	4.67272	5.41029	4.39084	3.36804
sp|Q14241|ELOA1_HUMAN	TCEB3	ELOA1_HUMAN Transcription elongation factor B polypeptide 3	5	10.0755	9.55723	10.2801	10.14	5.48121	5.34597	5.78935	5.5599	5.15656	4.43121	4.68341	4.74534	3.87034	6.70016	4.05467	4.12908
sp|Q9ULV3|CIZ1_HUMAN	CIZ1	CIZ1_HUMAN Cip1-interacting zinc finger protein	8	5.63136	5.15014	5.36928	5.51437	5.78617	5.80378	5.63824	5.98685	6.09524	6.12182	5.98033	6.44132	7.25376	7.321	7.6995	8.20684
sp|P11279|LAMP1_HUMAN	LAMP1	LAMP1_HUMAN Lysosome-associated membrane glycoprotein 1	14	4.98358	3.77881	4.50558	4.85636	5.39395	5.78424	5.17571	5.96826	6.15433	6.81552	5.37801	6.36482	7.62212	8.06944	8.88217	10.2671
sp|P49757|NUMB_HUMAN	NUMB	NUMB_HUMAN Protein numb homolog	8	6.45965	7.41597	6.51016	6.32842	6.58586	5.99031	6.41766	6.05794	6.30786	5.81996	6.82707	5.96622	6.15874	5.37051	6.292	5.49168
sp|Q9Y6R0|NUMBL_HUMAN	NUMBL	NUMBL_HUMAN Numb-like protein	3	7.22272	5.01038	6.84509	6.50032	6.88938	6.1057	6.80989	6.21364	6.7436	6.09169	6.90751	6.05856	6.09025	5.25387	6.31821	4.9392
sp|P17020|ZNF16_HUMAN	ZNF16	ZNF16_HUMAN Zinc finger protein 16	1	7.9728	7.73099	8.91387	8.74322	5.57739	5.23543	6.70832	6.35628	4.3007	5.12959	5.81421	5.98608	4.60542	5.51241	4.82362	6.58965
sp|Q9BTF0|THUM2_HUMAN	THUMPD2	THUM2_HUMAN THUMP domain-containing protein 2	5	7.164	7.59729	7.47545	7.35549	6.77545	6.53917	6.92275	6.35253	6.34633	6.23786	6.56471	6.51846	4.91323	4.97772	4.24346	4.01611
sp|P61599|NAA20_HUMAN	NAA20	NAA20_HUMAN N-alpha-acetyltransferase 20	7	5.24694	4.64326	5.18112	5.13395	6.48009	6.00429	5.9287	6.10332	6.91185	6.46823	6.48051	6.75132	7.84479	6.97774	6.64821	7.19569
sp|Q96KB5|TOPK_HUMAN	PBK	TOPK_HUMAN Lymphokine-activated killer T-cell-originated protein kinase	32	6.7161	6.96568	6.97257	6.9688	7.10277	6.7084	7.18641	6.86607	7.38658	6.66637	7.01894	6.76723	4.93419	4.68493	3.83784	3.2171
sp|O60925|PFD1_HUMAN	PFDN1	PFD1_HUMAN Prefoldin subunit 1	12	5.2211	4.7381	4.90592	5.07374	6.37552	6.72817	5.90564	6.61946	5.73302	6.98368	6.30061	6.67201	7.92034	7.13166	4.75495	8.93608
sp|Q9H9C1|SPE39_HUMAN	VIPAS39	SPE39_HUMAN Spermatogenesis-defective protein 39 homolog	8	8.22131	7.86709	7.69432	7.76934	6.80389	6.22563	6.47364	6.27438	6.20627	5.97138	6.37206	6.03672	4.85982	5.04804	4.5008	3.6753
sp|P31939|PUR9_HUMAN	ATIC	PUR9_HUMAN Bifunctional purine biosynthesis protein PURH	85	5.19832	4.3845	5.2417	5.18213	6.14628	6.19248	5.99903	6.0825	6.17309	6.60334	6.43422	6.53076	7.54046	7.12147	7.76442	7.40531
sp|Q8WUH2|TGFA1_HUMAN	TGFBRAP1	TGFA1_HUMAN Transforming growth factor-beta receptor-associated protein 1	4	8.50502	9.82385	8.92954	8.28636	6.25268	7.64662	7.76463	7.78108	5.95648	6.49195	6.75336	5.52921	2.76383	3.77758	2.09646	1.64136
sp|P86397|HTD2_HUMAN	RPP14	HTD2_HUMAN Hydroxyacyl-thioester dehydratase type 2, mitochondrial	2	4.85147	4.40423	5.47464	5.40075	6.21909	7.3481	6.02503	6.19163	6.4261	7.39178	6.29152	7.65059	7.67324	6.02547	5.61936	7.00701
sp|Q15573|TAF1A_HUMAN	TAF1A	TAF1A_HUMAN TATA box-binding protein-associated factor RNA polymerase I subunit A	2	8.75725	9.47229	8.96952	9.19037	6.92282	6.3542	6.34166	6.67475	6.23304	4.69727	5.09554	5.15997	4.62445	4.33857	3.56756	3.60075
sp|O00442-2|RTCA_HUMAN	RTCA	RTCA_HUMAN Isoform 2 of RNA 3'-terminal phosphate cyclase	15	5.24527	4.90181	5.48658	5.75697	6.05179	5.89524	5.93793	5.91178	6.29793	6.5862	6.34893	6.23317	7.52274	6.97671	7.61159	7.23535
sp|P15880|RS2_HUMAN	RPS2	RS2_HUMAN 40S ribosomal protein S2	76	6.4206	6.10595	6.11884	6.27056	5.95843	5.70125	5.85727	5.67585	5.7962	5.50631	5.95626	5.62446	6.55614	6.73681	7.88283	7.83224
sp|Q07021|C1QBP_HUMAN	C1QBP	C1QBP_HUMAN Complement component 1 Q subcomponent-binding protein, mitochondrial	74	5.02121	4.61717	5.16326	5.19455	5.78344	6.04708	5.57759	5.97308	6.06461	6.54998	6.1353	6.5916	7.42639	7.29905	8.07638	8.4793
sp|Q01968|OCRL_HUMAN	OCRL	OCRL_HUMAN Inositol polyphosphate 5-phosphatase OCRL-1	14	6.72686	6.91906	6.85712	6.83417	6.6296	6.33377	6.82406	6.28046	6.84315	6.46341	6.44797	6.236	5.72601	5.52951	5.10149	4.24736
sp|P32019|I5P2_HUMAN	INPP5B	I5P2_HUMAN Type II inositol 1,4,5-trisphosphate 5-phosphatase	6	7.14887	6.81163	6.96393	7.19884	6.76207	6.65009	6.66853	6.49768	7.7421	6.95829	6.61564	6.78243	5.1786	4.44632	3.9601	3.61489
sp|Q9BXP2|S12A9_HUMAN	SLC12A9	S12A9_HUMAN Solute carrier family 12 member 9	7	6.55814	6.33134	6.59579	6.10367	6.6444	6.35036	6.8439	6.63908	6.40002	6.83626	6.70467	6.26931	5.81343	5.76035	5.2508	4.89849
sp|Q5TDH0-3|DDI2_HUMAN	DDI2	DDI2_HUMAN Isoform 3 of Protein DDI1 homolog 2	22	4.66889	4.60347	4.98193	5.26029	5.67302	6.13137	5.69773	6.19013	5.92529	6.67107	6.53413	6.86768	7.0384	7.44322	7.87233	8.44105
sp|O94763|RMP_HUMAN	URI1	RMP_HUMAN Unconventional prefoldin RPB5 interactor 1	16	6.23322	6.8263	6.29569	6.2256	6.19967	6.29194	5.75329	6.04215	6.00754	6.03672	5.84152	6.06191	5.88612	6.43284	6.72181	7.14368
sp|P48147|PPCE_HUMAN	PREP	PPCE_HUMAN Prolyl endopeptidase	80	5.09948	4.839	4.95845	5.09471	5.5543	6.34439	5.62331	6.01954	5.76228	6.54808	6.15844	6.37332	7.24334	7.45686	8.04657	8.87796
sp|Q9NRW7|VPS45_HUMAN	VPS45	VPS45_HUMAN Vacuolar protein sorting-associated protein 45	20	7.79026	8.39019	8.01885	7.81146	7.04961	6.57256	7.26928	6.93019	6.69203	6.00178	6.93133	6.48125	4.06328	4.26226	3.15126	2.58441
sp|Q99708-2|COM1_HUMAN	RBBP8	COM1_HUMAN Isoform 2 of DNA endonuclease RBBP8	5	6.44983	7.15966	6.57571	6.59546	6.22972	5.94219	6.27243	6.14069	6.4737	6.57796	6.66629	6.36698	5.63503	5.64384	5.86129	5.40922
sp|Q71U36|TBA1A_HUMAN	TUBA1A	TBA1A_HUMAN Tubulin alpha-1A chain	213	7.82164	7.19081	7.828	7.87553	7.06016	6.73177	7.23119	6.8346	6.46183	5.99885	6.64486	6.02466	4.41	4.79867	3.7739	3.31352
sp|Q9BQE3|TBA1C_HUMAN	TUBA1C	TBA1C_HUMAN Tubulin alpha-1C chain	38	7.0193	4.84238	7.47215	7.48275	6.87555	6.93111	7.11577	6.78167	6.49262	6.33305	6.81351	6.46758	4.847	5.35285	4.63604	4.53668
sp|P68366|TBA4A_HUMAN	TUBA4A	TBA4A_HUMAN Tubulin alpha-4A chain	7	8.8424	5.05279	9.0598	8.89618	7.66004	6.94711	8.05871	7.52414	6.54677	6.01793	6.4507	5.72675	3.78388	4.31124	2.85542	2.26614
tr|C9JJQ8|C9JJQ8_HUMAN	TUBA4A	C9JJQ8_HUMAN Tubulin alpha-4A chain (Fragment)	1	7.69671	8.0773	7.53523	7.17643	8.01896	7.96193	6.13035	6.34084	5.98202	5.13988	5.9061	6.55178	5.89468	3.94968	4.24057	3.39754
sp|A6NHL2|TBAL3_HUMAN	TUBAL3	TBAL3_HUMAN Tubulin alpha chain-like 3	1	5.77933	7.20437	7.27438	7.56273	5.74166	6.74929	7.99941	5.25385	8.65333	8.31038	5.77989	7.3718	3.66755	6.21515	3.35917	3.07772
sp|Q8N0T1|CH059_HUMAN	C8orf59	CH059_HUMAN Uncharacterized protein C8orf59	6	6.11903	6.69795	6.90887	6.24704	6.71795	6.56904	7.0423	6.75309	6.83397	6.25245	6.92036	6.52879	5.39951	5.01167	5.14597	4.852
sp|Q9Y3C7|MED31_HUMAN	MED31	MED31_HUMAN Mediator of RNA polymerase II transcription subunit 31	2	6.93866	6.7312	6.1543	6.0363	6.8917	6.27001	6.34677	6.48073	6.11636	6.07067	6.66585	6.35145	6.35827	6.15378	4.88584	5.5481
tr|I3L2J1|I3L2J1_HUMAN	MED31	I3L2J1_HUMAN Mediator of RNA polymerase II transcription subunit 31	1	6.12065	5.83307	6.04393	5.51758	6.08282	5.60203	5.39761	6.13669	8.45363	6.61298	5.83853	6.76699	7.68526	5.54083	6.37668	5.99072
sp|Q9HAU5|RENT2_HUMAN	UPF2	RENT2_HUMAN Regulator of nonsense transcripts 2	35	8.61331	8.79243	8.77744	8.43986	7.10109	6.57561	7.13187	6.70833	6.19636	5.71018	6.3221	5.74052	3.43461	4.47439	3.16762	2.81427
sp|O60353|FZD6_HUMAN	FZD6	FZD6_HUMAN Frizzled-6	7	6.44252	6.4847	7.05908	7.16788	6.94026	6.41425	6.66008	6.28383	6.21546	6.12047	6.75778	6.63351	5.56703	5.57352	4.99877	4.68084
sp|Q9NQW7-3|XPP1_HUMAN	XPNPEP1	XPP1_HUMAN Isoform 3 of Xaa-Pro aminopeptidase 1	42	5.95339	6.28409	5.89376	5.61713	6.6006	6.2416	6.41471	6.29906	6.81226	6.58272	6.59115	6.42439	7.24122	6.11976	6.05241	4.87174
sp|Q5SWX8|ODR4_HUMAN	ODR4	ODR4_HUMAN Protein odr-4 homolog	13	7.30202	7.51523	7.13589	7.03869	6.79448	6.50648	6.93505	6.58056	7.13838	6.47876	6.64271	6.60072	5.12623	4.59431	4.0866	3.5239
sp|Q9NVI7-2|ATD3A_HUMAN	ATAD3A	ATD3A_HUMAN Isoform 2 of ATPase family AAA domain-containing protein 3A	14	10.7383	10.2113	10.8512	10.3498	6.65492	5.98588	7.18468	6.40293	5.2906	4.58041	5.52326	4.58089	2.46805	5.15495	2.22661	1.79619
sp|Q5T9A4|ATD3B_HUMAN	ATAD3B	ATD3B_HUMAN ATPase family AAA domain-containing protein 3B	15	10.9275	10.404	10.8641	10.7634	6.50824	6.22711	7.48458	6.70986	4.98278	4.58538	5.68504	4.78375	2.07073	4.64607	1.81818	1.53926
sp|Q8WWX9|SELM_HUMAN	SELM	SELM_HUMAN Selenoprotein M	5	5.35431	4.78361	5.11828	5.84647	6.39388	6.14421	5.56074	5.72933	5.81837	6.42785	6.45179	6.90095	7.96998	7.28445	5.7868	8.42899
sp|Q53FZ2|ACSM3_HUMAN	ACSM3	ACSM3_HUMAN Acyl-coenzyme A synthetase ACSM3, mitochondrial	4	6.54156	7.31941	7.27851	6.91385	6.92265	6.18024	6.84752	6.17253	7.55335	6.08766	6.80544	6.12352	5.50498	5.22299	4.53278	3.993
sp|Q8NE18|NSUN7_HUMAN	NSUN7	NSUN7_HUMAN Putative methyltransferase NSUN7	4	6.04544	5.18268	5.75616	6.30864	5.95493	4.91347	4.57235	4.84183	6.60849	6.4298	4.98746	6.65723	7.52181	7.41896	7.38481	9.41594
sp|P26572|MGAT1_HUMAN	MGAT1	MGAT1_HUMAN Alpha-1,3-mannosyl-glycoprotein 2-beta-N-acetylglucosaminyltransferase	9	5.44179	5.09852	5.32504	5.23223	6.27168	5.86079	5.77126	6.07789	6.40695	6.607	6.2028	6.59742	7.23263	7.02984	7.33019	7.51397
sp|Q9NW38-2|FANCL_HUMAN	FANCL	FANCL_HUMAN Isoform 2 of E3 ubiquitin-protein ligase FANCL	2	7.21578	7.58804	7.86008	8.08305	6.60041	6.03647	7.21894	6.59367	6.42094	6.72144	6.35881	6.95799	4.94158	4.50938	3.76013	3.13329
sp|Q6PD74|AAGAB_HUMAN	AAGAB	AAGAB_HUMAN Alpha- and gamma-adaptin-binding protein p34	7	6.84727	7.15343	6.99871	7.03507	6.90057	6.05375	6.58374	5.95706	6.82778	5.82532	6.74014	6.34444	6.1707	5.50031	5.01775	4.04395
sp|Q00325|MPCP_HUMAN	SLC25A3	MPCP_HUMAN Phosphate carrier protein, mitochondrial	58	8.93835	7.42315	8.63392	8.66943	7.07922	6.68436	7.46625	6.94336	6.27332	5.77817	6.52677	6.02793	3.71813	4.32238	2.98273	2.53254
sp|Q99550|MPP9_HUMAN	MPHOSPH9	MPP9_HUMAN M-phase phosphoprotein 9	2	4.64834	32.9188	4.49998	2.43755	3.52029	3.63606	3.41612	2.97824	4.8244	4.04601	3.60206	4.39484	7.59149	6.05935	5.52246	5.90403
sp|P04181|OAT_HUMAN	OAT	OAT_HUMAN Ornithine aminotransferase, mitochondrial	54	5.72621	5.47655	5.50041	5.31147	6.35931	5.97575	6.06574	5.92169	6.46621	6.02226	6.18331	5.94206	7.84114	6.53581	7.87101	6.80106
sp|P09497|CLCB_HUMAN	CLTB	CLCB_HUMAN Clathrin light chain B	13	5.14694	5.8188	5.11951	5.24703	5.1596	6.07828	5.29905	5.80552	5.40205	6.0608	5.67583	6.10811	6.97751	7.86717	8.32553	9.90826
sp|P09497-2|CLCB_HUMAN	CLTB	CLCB_HUMAN Isoform Non-brain of Clathrin light chain B	1	4.91762	5.55403	4.67927	4.76462	5.07973	5.36203	5.17614	5.62364	5.68103	6.06248	5.50099	6.48873	7.15691	7.88582	9.12348	10.9435
sp|Q8IWW6|RHG12_HUMAN	ARHGAP12	RHG12_HUMAN Rho GTPase-activating protein 12	38	7.23477	7.41531	7.44569	7.31456	6.77629	6.52995	6.86291	6.73575	6.92066	6.32082	6.60656	6.35943	4.68428	4.97409	4.11696	3.70197
sp|Q8IWW6-3|RHG12_HUMAN	ARHGAP12	RHG12_HUMAN Isoform 3 of Rho GTPase-activating protein 12	1	7.33589	6.95074	7.40558	7.44178	7.60575	6.34576	7.09867	7.52264	7.02767	6.22204	6.6277	7.02796	3.89107	3.90574	3.89183	3.69919
sp|Q8WW12|PCNP_HUMAN	PCNP	PCNP_HUMAN PEST proteolytic signal-containing nuclear protein	12	4.74086	5.14657	4.69016	4.93602	5.27581	5.63814	5.27485	5.71722	5.53157	6.29288	5.56511	6.31867	7.82079	7.99211	8.81841	10.2408
sp|O43761|SNG3_HUMAN	SYNGR3	SNG3_HUMAN Synaptogyrin-3	1	7.82451	8.24467	6.9711	7.36107	6.25782	7.0061	6.85613	6.50879	6.35785	5.765	6.06731	6.58425	5.00519	4.59322	4.71243	3.88457
sp|Q9BVL4|SELO_HUMAN	SELO	SELO_HUMAN Selenoprotein O	9	7.6144	8.36525	8.32603	8.03613	6.36903	6.57131	7.22953	6.38943	6.90198	6.22781	6.32526	6.14774	4.17671	4.833	3.3947	3.09169
sp|P19838-2|NFKB1_HUMAN	NFKB1	NFKB1_HUMAN Isoform 2 of Nuclear factor NF-kappa-B p105 subunit	37	6.15337	5.92823	6.12933	6.09075	6.58589	6.46676	6.45976	6.50969	6.83436	6.57914	6.60248	6.49151	6.52931	5.92374	5.68411	5.03154
sp|P61011|SRP54_HUMAN	SRP54	SRP54_HUMAN Signal recognition particle 54 kDa protein	33	8.6629	8.62176	8.61382	8.63984	7.24832	6.79431	7.37739	7.15655	6.33925	5.77195	6.43855	5.80152	3.23851	4.24485	2.77697	2.27351
sp|Q13641|TPBG_HUMAN	TPBG	TPBG_HUMAN Trophoblast glycoprotein	12	5.06475	5.2577	5.10616	5.28788	5.51224	6.22287	5.35278	5.85831	5.63808	6.50251	5.90363	6.33322	7.17718	7.67529	8.09393	9.01348
sp|Q00653-4|NFKB2_HUMAN	NFKB2	NFKB2_HUMAN Isoform 4 of Nuclear factor NF-kappa-B p100 subunit	41	5.99491	5.60387	5.99593	5.92795	6.47052	6.21866	6.44125	6.25904	6.77463	6.59308	6.59188	6.59216	6.66905	6.18687	6.07851	5.6017
sp|Q96AY3|FKB10_HUMAN	FKBP10	FKB10_HUMAN Peptidyl-prolyl cis-trans isomerase FKBP10	26	4.89642	5.35678	4.65816	4.91841	5.36908	5.7587	5.05853	5.39265	5.69808	6.26116	5.61362	6.3765	7.55942	7.98659	8.88578	10.2101
sp|O95865|DDAH2_HUMAN	DDAH2	DDAH2_HUMAN N(G),N(G)-dimethylarginine dimethylaminohydrolase 2	9	5.24149	5.4335	5.15603	5.00803	6.04217	6.15901	5.46361	6.04524	6.18439	6.65307	6.15594	6.17047	7.79872	7.22808	6.81571	8.44453
sp|O94760|DDAH1_HUMAN	DDAH1	DDAH1_HUMAN N(G),N(G)-dimethylarginine dimethylaminohydrolase 1	23	5.03894	3.32083	4.77903	5.1396	6.13936	6.16376	5.81285	6.08662	5.89239	6.51059	6.15883	6.22771	7.41125	7.77852	8.30375	9.23599
sp|P40926|MDHM_HUMAN	MDH2	MDHM_HUMAN Malate dehydrogenase, mitochondrial	154	5.21655	5.14949	5.24456	5.50667	5.5576	5.94969	5.3191	5.82872	5.63913	6.23956	5.8143	6.32209	7.19005	7.46299	8.25986	9.29964
sp|Q6ZRI6|CO039_HUMAN	C15orf39	CO039_HUMAN Uncharacterized protein C15orf39	7	6.84746	7.22773	6.91547	7.06727	6.99665	6.14497	6.75455	6.49166	6.66151	6.19291	6.82074	6.51731	4.91259	5.30278	4.60392	4.54248
sp|P06396|GELS_HUMAN	GSN	GELS_HUMAN Gelsolin	30	5.03285	5.41202	4.85813	5.10382	5.28635	5.70571	5.08203	5.47433	5.51579	6.22621	5.5474	6.24697	7.47045	8.02752	8.9577	10.0527
sp|Q8NBI6|XXLT1_HUMAN	XXYLT1	XXLT1_HUMAN Xyloside xylosyltransferase 1	6	5.21362	6.60447	5.33977	5.31399	6.14445	5.79174	5.85485	6.00445	6.5298	6.21316	5.95793	6.53752	7.2054	6.83234	7.15367	7.30286
sp|Q9BTW9|TBCD_HUMAN	TBCD	TBCD_HUMAN Tubulin-specific chaperone D	33	8.34565	8.63717	8.23732	8.18082	7.0088	6.65296	7.28519	6.69004	6.50468	5.84864	6.31163	5.90754	3.88289	4.37115	3.35894	2.77657
sp|O15212|PFD6_HUMAN	PFDN6	PFD6_HUMAN Prefoldin subunit 6	19	4.84404	5.24731	4.46376	4.58712	5.79365	6.30988	5.6596	6.15588	6.36652	6.54549	6.15017	6.14296	7.27139	7.24488	8.09131	9.12604
sp|Q9BUE0|MED18_HUMAN	MED18	MED18_HUMAN Mediator of RNA polymerase II transcription subunit 18	9	5.5694	5.71614	5.54747	5.61777	5.71208	5.79438	5.50165	5.96307	6.05294	6.15555	5.65055	6.30952	7.46255	7.35206	7.29188	8.30298
sp|A6NGB9|WIPF3_HUMAN	WIPF3	WIPF3_HUMAN WAS/WASL-interacting protein family member 3	8	4.7446	5.38984	4.81687	5.48892	5.39592	5.55103	5.12489	5.40125	5.74577	6.47305	5.49985	6.67612	7.63968	7.59945	8.56003	9.89272
sp|O75044|SRGP2_HUMAN	SRGAP2	SRGP2_HUMAN SLIT-ROBO Rho GTPase-activating protein 2	14	7.47542	7.92817	7.71772	7.46336	7.01658	6.86398	7.18428	6.67438	6.91137	6.20272	6.95492	6.29796	4.22557	4.63329	3.53873	2.91154
sp|Q9P270|SLAI2_HUMAN	SLAIN2	SLAI2_HUMAN SLAIN motif-containing protein 2	14	6.11167	5.57124	6.29415	6.12608	6.41966	6.2476	6.19594	6.25644	6.20622	5.98249	6.40596	6.32498	6.35384	6.15902	6.6749	6.66981
sp|Q9UJW0|DCTN4_HUMAN	DCTN4	DCTN4_HUMAN Dynactin subunit 4	25	6.54281	5.79947	6.44867	6.52491	6.60457	6.20474	6.40374	5.96759	6.55464	6.20843	6.54842	6.13339	6.55356	5.50752	6.59489	5.40267
[truncated: 6,594 more rows]
