# Supplementary material for: Assessing target engagement using proteome-wide solvent shift assays
Source: eLife. 2021 Dec 8;10:e70784. doi: 10.7554/eLife.70784 (PMC8654358; doi:10.7554/eLife.70784)
Supplement: Figure 5—source data 1. [file elife-70784-fig5-data1.xlsx]

## Sheet: legend
The table contains two SPP repeat experiments and two TPP repeat experiments (no treatment).
Each replicate is a 8-concentration SPP experiment or 8-temperature TPP experiment.
Two SPP repeat experiments or two TPP repeat experiments are in one single TMTpro-16plex group.
	Rep1								Rep2
AEA (%)	0	3	6	9	12	15	18	21	0	3	6	9	12	15	18	21
TMTpro labeling	126	127N	127C	128N	128C	129N	129C	130N	130C	131N	131C	132N	132C	133N	133C	134N
	Rep1								Rep2
Temperature (°C)	38	41.9	44.7	47.9	51.1	54.3	57	60.7	38	41.9	44.7	47.9	51.1	54.3	57	60.7
TMTpro labeling	126	127N	127C	128N	128C	129N	129C	130N	130C	131N	131C	132N	132C	133N	133C	134N
Peptides	The number of quantified peptides
norm_rel_fc	Protein quantifications (scaled to the first concentration or temperature, then normalized by TPP package to account for technical errors)
meltPoint	Denaturation concentration or melting temperature determined by TPP pacakge
slope	Curve slope determined by TPP pacakge
plateau	Curve plateau determined by TPP pacakge
R_sq	Curve R2 determined by TPP package
model_converged	Does the fitting of the sigmoidal curve succeed?
Pass_R2(0.8)&Plateau(0.3)	Does the curve have a R2 greater than 0.3, a plateau smaller than 0.3, a valid denaturation concentration, and a valid slope?
For details for column names and TPP package: Franken, H., Mathieson, T., Childs, D. et al. Thermal proteome profiling for unbiased identification of direct and indirect drug targets using multiplexed quantitative mass spectrometry. Nat Protoc 10, 1567–1593 (2015). https://doi.org/10.1038/nprot.2015.101

## Sheet: SPP_TPP_8Concentrations_2Reps
Uniprot ID	Gene Symbol	SPP_Peptides_Rep1	SPP_Peptides_Rep2	SPP_norm_rel_fc_126_Rep1	SPP_norm_rel_fc_127N_Rep1	SPP_norm_rel_fc_127C_Rep1	SPP_norm_rel_fc_128N_Rep1	SPP_norm_rel_fc_128C_Rep1	SPP_norm_rel_fc_129N_Rep1	SPP_norm_rel_fc_129C_Rep1	SPP_norm_rel_fc_130N_Rep1	SPP_norm_rel_fc_130C_Rep2	SPP_norm_rel_fc_131N_Rep2	SPP_norm_rel_fc_131C_Rep2	SPP_norm_rel_fc_132N_Rep2	SPP_norm_rel_fc_132C_Rep2	SPP_norm_rel_fc_133N_Rep2	SPP_norm_rel_fc_133C_Rep2	SPP_norm_rel_fc_134N_Rep2	SPP_meltPoint_Rep1	SPP_slope_Rep1	SPP_plateau_Rep1	SPP_R_sq_Rep1	SPP_meltPoint_Rep2	SPP_slope_Rep2	SPP_plateau_Rep2	SPP_R_sq_Rep2	SPP_model_converged_Rep1	SPP_model_converged_Rep2	SPP_Pass_R2(0.8)&Plateau(0.3)_Rep1	SPP_Pass_R2(0.8)&Plateau(0.3)_Rep2	TPP_Peptides_Rep1	TPP_Peptides_Rep2	TPP_norm_rel_fc_126_Rep1	TPP_norm_rel_fc_127N_Rep1	TPP_norm_rel_fc_127C_Rep1	TPP_norm_rel_fc_128N_Rep1	TPP_norm_rel_fc_128C_Rep1	TPP_norm_rel_fc_129N_Rep1	TPP_norm_rel_fc_129C_Rep1	TPP_norm_rel_fc_130N_Rep1	TPP_norm_rel_fc_130C_Rep2	TPP_norm_rel_fc_131N_Rep2	TPP_norm_rel_fc_131C_Rep2	TPP_norm_rel_fc_132N_Rep2	TPP_norm_rel_fc_132C_Rep2	TPP_norm_rel_fc_133N_Rep2	TPP_norm_rel_fc_133C_Rep2	TPP_norm_rel_fc_134N_Rep2
A0AV02-2	SLC12A8	3	3	1	1.06152	1.02961	0.911886	0.589072	0.386613	0.204724	0.15748	1	0.888307	1.07347	0.953299	0.581301	0.353485	0.189491	0.114353	13.1303	-0.106487	0.0228773	0.993503	12.9788	-0.121849	0.036263	0.980051	Yes	Yes	Yes	Yes	3	3	0.99202	0.982602	0.872848	0.62565	0.520337	0.342102	0.267908	0.206082	0.99202	0.884378	0.779714	0.649536	0.506426	0.361254	0.248683	0.16899
A0AV96	RBM47	3	3	1	0.961321	1.07673	1.1035	0.646053	0.441625	0.315777	0.377462	1	0.961406	1.00288	1.04693	0.728992	0.614064	0.840476	0.720423	13.0009	-0.204906	0.365936	0.967879		-0.577884	0.724988	0.839192	Yes	Yes			4	4	0.99202	0.909709	0.787368	0.440749	0.241742	0.158287	0.112683	0.0706255	0.99202	0.935977	0.681199	0.465999	0.245282	0.179463	0.127861	0.0795129
A0AVF1	TTC26	6	6	1	1.08455	1.01736	0.938861	0.548097	0.253166	0.101951	0.0570464	1	0.971862	1.11073	0.978777	0.593116	0.255448	0.104894	0.0785035	12.4172	-0.14761	0	0.994065	12.6512	-0.164059	0.0409894	0.989553	Yes	Yes	Yes	Yes	9	9	0.99202	0.87516	0.736675	0.53069	0.312686	0.195237	0.109513	0.0811896	0.99202	0.889579	0.725483	0.541064	0.30775	0.188094	0.121944	0.0862814
A0AVT1	UBA6	59	59	1	0.997322	1.00187	0.991043	0.72938	0.403795	0.140464	0.0445453	1	0.998881	1.01701	0.966927	0.760926	0.440451	0.167087	0.0520319	13.8538	-0.141072	0	0.996857	14.1707	-0.135632	0	0.996336	Yes	Yes	Yes	Yes	67	67	0.99202	0.968435	0.877726	0.702151	0.514537	0.349579	0.23004	0.127036	0.99202	0.943954	0.892447	0.695046	0.531419	0.346328	0.228861	0.129009
A0FGR8-6	ESYT2	24	24	1	1.03655	1.00163	0.917942	0.528383	0.250902	0.121829	0.0704763	1	1.02421	1.04973	0.933578	0.574928	0.267749	0.119594	0.069521	12.2734	-0.142217	0.0106991	0.998759	12.5925	-0.140828	0	0.997445	Yes	Yes	Yes	Yes	24	24	0.99202	0.903849	0.749789	0.550256	0.374244	0.244097	0.159452	0.0947854	0.99202	0.907417	0.714446	0.547061	0.35196	0.225295	0.162532	0.097167
A0JNW5	UHRF1BP1L	21	21	1	0.980806	1.02967	0.980521	0.662498	0.322146	0.110051	0.0599584	1	0.963099	0.995316	0.960529	0.659864	0.324048	0.109424	0.0613358	13.2237	-0.146438	0	0.99794	13.1947	-0.143979	0	0.997779	Yes	Yes	Yes	Yes	28	28	0.99202	0.935132	0.856575	0.710138	0.52581	0.367252	0.268414	0.184538	0.99202	0.929521	0.833835	0.708424	0.561129	0.380765	0.2712	0.169466
A0MZ66-3	KIAA1598	47	47	1	1.00656	1.04642	1.03094	0.868096	0.992564	1.13687	1.17972	1	0.995232	1.03287	0.995457	0.870587	0.877643	1.03428	1.01359		0.296893	1.17972	0.673474		-0.12794	0.949024	0.21068	Yes	Yes
A0PJW6	TMEM223	3	3	1	0.797475	0.860118	0.652292	0.397848	0.228116	0.0928434	0.0695707	1	0.918922	0.866547	0.814129	0.503921	0.246378	0.170777	0.0396028	10.2615	-0.122311	0	0.940186	11.7885	-0.12318	0	0.972865	Yes	Yes	Yes	Yes	3	3	0.99202	0.931777	0.78406	0.470306	0.34582	0.183477	0.147745	0.0775061	0.99202	0.869113	0.8389	0.61665	0.38485	0.236228	0.182504	0.120453
A0PK00	TMEM120B	4	4	1	1.01869	1.1554	0.960116	0.599731	0.332246	0.230078	0.0418035	1	1.0736	0.993192	0.986961	0.624951	0.245101	0.15727	0.0768777	13.0869	-0.122972	0	0.973324	12.7742	-0.170936	0.0707486	0.994649	Yes	Yes	Yes	Yes	2	2	0.99202	0.740483	0.714575	0.565145	0.474503	0.261082	0.257293	0.166172	0.99202	0.80767	0.652674	0.529979	0.368884	0.24917	0.126558	0.114878
A1A4S6	ARHGAP10	17	17	1	1.02331	1.02095	0.926846	0.499601	0.232219	0.138522	0.0702418	1	0.97687	1.006	0.864095	0.550148	0.238966	0.122431	0.0798646	12.0746	-0.154744	0.0467358	0.99852	12.2135	-0.133453	0	0.998183	Yes	Yes	Yes	Yes	17	17	0.99202	0.953976	0.820971	0.603501	0.325948	0.179415	0.12274	0.0726449	0.99202	0.952601	0.825034	0.640945	0.371492	0.17958	0.138431	0.0839131
A1A5B4	ANO9	1	1	1	1.71648	1.2704	1.21962	0.737587	0.505548	0.520704	0	1	0.888246	1.06419	0.961127	0.753518	0.348642	0.217082	0	15.424	-0.10187	0	0.642319	13.8221	-0.141834	0	0.976903	Yes	Yes		Yes
A1L0T0	ILVBL	23	23	1	1.05328	1.05741	0.958353	0.617487	0.336093	0.215479	0.128494	1	1.00202	1.05007	0.942544	0.607108	0.336268	0.198456	0.127744	13.0873	-0.127483	0.0757003	0.993446	13.0181	-0.124106	0.0553056	0.997169	Yes	Yes	Yes	Yes	18	18	0.99202	0.889668	0.762972	0.579465	0.358782	0.235577	0.171103	0.118053	0.99202	0.916989	0.758014	0.583865	0.366073	0.244551	0.169926	0.11763
A1L170-2	C1orf226	2	2	1	1.08005	1.10934	1.00819	0.834341	0.753277	0.584971	0.484327	1	0.967061	0.968341	0.912805	0.789735	0.573705	0.517175	0.316434	20.526	-0.0504448	0.101993	0.941831	16.9759	-0.0617776	0	0.981366	Yes	Yes	Yes	Yes	1	1	0.99202	0.762478	1.11956	0.701232	0.795075	0.551037	0.625405	0.435514	0.99202	0.994449	0.885985	0.906087	0.868116	0.587811	0.475487	0.326852
A1L390	PLEKHG3	4	4	1	1.03906	1.1536	1.06179	0.631534	0.363076	0.177553	0.0946163	1	0.924714	1.00415	0.963852	0.60907	0.266905	0.104395	0.0933019	13.3187	-0.138879	0.0538375	0.970458	12.7431	-0.157944	0.0407816	0.994503	Yes	Yes	Yes	Yes	4	4	0.99202	0.979846	0.925629	0.782674	0.527462	0.378452	0.479731	0.222187	0.99202	1.04013	0.965314	0.791659	0.500884	0.345633	0.267836	0.20115
A1L3X0	ELOVL7	1	1	1	0.900776	0.880267	0.902905	0.524859	0.299739	0.132119	0.0900943	1	0.942787	1.13321	0.942605	0.521043	0.319456	0.172017	0.0474059	12.3542	-0.126097	0	0.974861	12.5485	-0.128717	0	0.976974	Yes	Yes	Yes	Yes	1	1	0.99202	0.800934	0.841708	0.666547	0.506706	0.294114	0.2328	0.129477	0.99202	0.836828	0.679451	0.599951	0.449522	0.261449	0.216215	0.170091
A1X283	SH3PXD2B	43	43	1	0.990965	1.00136	0.958652	0.826513	0.811904	0.427282	0.0731814	1	1.0282	1.02698	1.00501	0.850434	0.773318	0.476179	0.0983669	17.1811	-0.153624	0	0.958147	17.233	-0.129916	0	0.964063	Yes	Yes	Yes	Yes	35	35	0.99202	1.1192	0.933796	0.821616	0.473626	0.205081	0.136895	0.100623	0.99202	0.957856	1.01369	0.79219	0.486867	0.224203	0.18152	0.0965651
A1XBS5	FAM92A1	11	11	1	1.00769	0.991597	0.93431	0.675866	0.367427	0.116555	0.0264206	1	1.02729	1.04609	0.994755	0.703391	0.371333	0.116768	0.0470003	13.3745	-0.140912	0	0.994489	13.5885	-0.145528	0	0.995081	Yes	Yes	Yes	Yes	8	8	0.99202	1.01202	0.876877	0.665338	0.408745	0.276017	0.167988	0.112014	0.99202	0.932642	0.8497	0.671565	0.399231	0.251857	0.159951	0.103639
A2A3K4-2	PTPDC1	1	1	1	0.995767	1.1063	1.17515	0.701422	0.4159	0.289157	0.10774	1	0.903636	0.921462	1.11134	0.607669	0.273672	0.128646	0	14.0742	-0.128425	0.0905083	0.948985	12.9292	-0.16636	0.00135579	0.968729	Yes	Yes	Yes	Yes
A2RRP1	NBAS	40	40	1	1.01264	1.01276	0.882558	0.476585	0.171821	0.100494	0.067789	1	1.0033	1.00888	0.89164	0.472191	0.179773	0.0999449	0.0728395	11.7473	-0.159667	0.0210114	0.999222	11.7556	-0.162533	0.0308258	0.999725	Yes	Yes	Yes	Yes	24	24	0.99202	0.805035	0.613823	0.322539	0.158435	0.103313	0.0721204	0.0475467	0.99202	0.85653	0.512325	0.356191	0.148584	0.101806	0.0807809	0.0459019
A2RTX5	TARSL2	20	20	1	1.02687	1.0741	1.01494	0.743216	0.66559	0.52337	0.347923	1	1.00447	1.04481	1.00519	0.728382	0.600318	0.499353	0.314682	17.7076	-0.0604831	0	0.963771	16.8439	-0.0645159	0.00065304	0.976293	Yes	Yes	Yes	Yes	17	17	0.99202	0.93951	0.82845	0.751982	0.604134	0.402933	0.245699	0.146847	0.99202	0.958292	0.928616	0.791744	0.675777	0.405735	0.250704	0.151013
A2RU67	KIAA1467	3	3	1	1.05442	1.06689	1.05307	0.761253	0.791329	0.752286	0.540476	1	1.03784	1.08538	0.94466	0.714423	0.674922	0.631822	0.358206		-0.0356265	0	0.852051	18.8995	-0.05042	0	0.922251	Yes	Yes		Yes	8	8	0.99202	0.998308	0.930287	0.782667	0.7588	0.670178	0.59125	0.521836	0.99202	0.941356	1.0395	0.782821	0.722408	0.554884	0.516673	0.427174
A2RUB1	C17orf104	1	1	1	1.06684	0.93767	0.929469	0.735104	0.597875	0.521522	0.47618	1	1.04556	1.06497	0.985127	0.777275	0.679567	0.536254	0.471705	19.157	-0.0624111	0.376382	0.978482	19.7095	-0.0580487	0.324898	0.975985	Yes	Yes			1	1	0.99202	0.844339	0.707337	0.494752	0.293329	0.201075	0.130679	0.0987152	0.99202	0.853366	0.661276	0.513569	0.353018	0.187646	0.156765	0.104922
A2RUC4	TYW5	5	5	1	1.04709	0.973183	1.0186	0.709456	0.371559	0.167384	0.0417847	1	1.01571	1.06294	1.04294	0.789127	0.413948	0.211329	0.051581	13.7046	-0.139547	0	0.994044	14.2964	-0.137747	0	0.991774	Yes	Yes	Yes	Yes	4	4	0.99202	1.0126	0.950103	0.68321	0.365389	0.219381	0.125801	0.0539558	0.99202	0.995535	0.898769	0.65161	0.292686	0.19561	0.108031	0.0701044
A2VDJ0-5	KIAA0922	8	8	1	0.972883	1.00717	0.942509	0.616783	0.327755	0.170488	0.105726	1	1.05549	0.969422	0.958445	0.639823	0.323736	0.167998	0.0976726	13.0441	-0.125252	0.0154263	0.999061	13.1559	-0.130888	0.020032	0.996315	Yes	Yes	Yes	Yes	7	7	0.99202	0.922656	0.867256	0.663903	0.517285	0.382574	0.281655	0.194512	0.99202	0.99072	0.827697	0.723427	0.500558	0.374606	0.285482	0.207912
A3KMH1	VWA8	54	54	1	1.0053	1.00173	0.889804	0.495195	0.218796	0.118283	0.0941629	1	0.985043	0.963491	0.871094	0.512962	0.222384	0.128686	0.102585	11.9286	-0.149446	0.0400912	0.999847	11.9851	-0.138916	0.0277737	0.998105	Yes	Yes	Yes	Yes	44	44	0.99202	0.851144	0.638345	0.350227	0.191877	0.113827	0.0850672	0.0542591	0.99202	0.848072	0.55286	0.374958	0.182967	0.118392	0.089823	0.0597655
A3KN83	SBNO1	33	33	1	1.03574	1.05901	1.0431	0.768706	0.387083	0.113487	0.0553395	1	1.0553	1.06287	1.03189	0.771278	0.408412	0.129531	0.0637763	13.9505	-0.155383	0	0.992782	14.0671	-0.148397	0	0.99153	Yes	Yes	Yes	Yes	34	34	0.99202	0.979745	0.94048	0.847618	0.60452	0.198828	0.12452	0.0780338	0.99202	0.97325	0.969737	0.823994	0.615952	0.208965	0.130397	0.0911786
A4D1E9	GTPBP10	18	18	1	1.01166	0.969349	0.866397	0.554337	0.304218	0.146497	0.0775609	1	1.02627	0.974247	0.837067	0.495511	0.286549	0.146595	0.0734636	12.4208	-0.122231	0	0.997854	11.9705	-0.122253	0	0.997845	Yes	Yes	Yes	Yes	13	13	0.99202	0.928998	0.744628	0.397387	0.240095	0.156988	0.103839	0.0641211	0.99202	1.04726	0.643281	0.406043	0.174362	0.114652	0.0923595	0.0600999
A4D1P6	WDR91	8	8	1	0.986476	1.00485	0.961745	0.64727	0.354303	0.159145	0.0874831	1	1.02408	1.03626	0.960551	0.678961	0.371167	0.15357	0.0787619	13.3102	-0.127118	0	0.998977	13.5079	-0.129893	0	0.997322	Yes	Yes	Yes	Yes	8	8	0.99202	0.962564	0.948084	0.7517	0.609595	0.455714	0.358132	0.245574	0.99202	0.962626	0.957733	0.766315	0.620515	0.483826	0.330111	0.253191
A4D1U4	LCHN	2	2	1	1.07621	1.07479	1.0663	0.692435	0.399265	0.287176	0.21843	1	1.04953	1.12336	1.0172	0.601411	0.461203	0.223471	0.115322	13.6246	-0.143721	0.218752	0.97965	13.741	-0.107834	0	0.968365	Yes	Yes	Yes	Yes	2	2	0.99202	0.919872	0.893385	0.796996	0.415655	0.329799	0.216545	0.181775	0.99202	0.919464	0.905202	0.635453	0.439664	0.282558	0.250519	0.134132
A5D8V6	VPS37C	3	3	1	0.998892	0.999654	0.971902	0.796888	0.799273	0.737849	0.625415	1	0.931079	1.02659	1.01423	0.759921	0.740861	0.629184	0.496369		-0.0281033	0	0.95256		-0.0436376	0.104807	0.933599	Yes	Yes			2	2	0.99202	0.998356	0.981181	1.01537	0.736407	0.744377	0.772594	0.789261	0.99202	1.00975	1.00232	0.909719	0.889138	0.755376	0.668558	0.675916
A5PLL7	TMEM189	3	3	1	0.994693	0.965174	1.10476	0.793323	0.632641	0.49504	0.318461	1	0.988499	1.00994	1.01008	0.754066	0.587836	0.391084	0.271697	17.1301	-0.0736004	0.106951	0.958574	15.9927	-0.0778613	0.00751237	0.992281	Yes	Yes	Yes	Yes	2	2	0.99202	0.960838	0.902163	0.789309	0.687445	0.546769	0.349686	0.321279	0.99202	0.936249	0.797292	0.875504	0.686122	0.527021	0.399438	0.305512
A5PLN9-5	TRAPPC13	8	8	1	0.982137	1.03373	0.968888	0.620057	0.343539	0.124859	0.0436969	1	1.01757	1.01719	0.969097	0.594635	0.356784	0.111808	0.0473668	13.0827	-0.137991	0	0.995445	12.9839	-0.136101	0	0.993545	Yes	Yes	Yes	Yes	6	6	0.99202	0.911219	0.962814	0.636867	0.474452	0.316577	0.215315	0.132554	0.99202	0.948515	0.855606	0.640369	0.420069	0.271941	0.190286	0.122331
A5YKK6	CNOT1	81	81	1	1.00073	1.01449	0.927301	0.577402	0.272366	0.10303	0.0486799	1	1.0006	1.00143	0.919807	0.58002	0.263235	0.107938	0.0568869	12.5819	-0.144803	0	0.99913	12.5624	-0.14354	0	0.999638	Yes	Yes	Yes	Yes	77	77	0.99202	0.896372	0.743975	0.494895	0.281849	0.149665	0.0901247	0.0466254	0.99202	0.927238	0.689277	0.504703	0.261488	0.143002	0.0960179	0.0547909
A5YM69	ARHGEF35	1	1	1	1.28512	1.31219	1.21259	1.04678	0.722176	0.99729	0.82908	1	0.958622	1.05874	0.962227	0.644643	0.509004	0.425159	0.479022		-0.0723325	0.851147	0.142564	14.676	-0.126618	0.449856	0.984978	Yes	Yes			1	1	0.99202	1.05632	1.00336	0.988648	0.650617	0.822696	0.598505	0.490944	0.99202	1.02482	1.07143	0.683972	0.505478	0.630056	0.576871	0.608275
A6H8Y1	BDP1	1	1	1	0.906838	0.991279	1.0246	0.4676	0.557784	0.362913	0.351622	1	1.10155	1.05541	1.28671	0.913001	0.428232	0.309279	0.339223	11.7546	-0.406729	0.423795	0.942678	14.3266	-0.211075	0.319993	0.906959	Yes	Yes
A6NCD4	C10orf131	2	2	1	1.08142	1.07285	1.13224	0.796197	0.554609	0.579803	0.389613	1	0.856307	0.964727	0.887094	0.614901	0.525821	0.304535	0.258562	17.0765	-0.108895	0.45796	0.918511	14.3191	-0.0764357	0	0.953614	Yes	Yes		Yes
A6NCE7	MAP1LC3B2	1	1	1	0.988367	0.979997	0.959865	0.814547	0.780871	0.733175	0.55966	1	0.915065	0.886353	0.856191	0.837479	0.543544	0.402097	0.392999		-0.0327949	0	0.952993	16.664	-0.0607825	0	0.916806	Yes	Yes		Yes	3	3	0.99202	0.952016	0.910137	0.835236	0.706537	0.524526	0.391098	0.285081	0.99202	0.986539	1.06596	0.837934	0.709118	0.579567	0.470652	0.270015
A6ND36	FAM83G	10	10	1	1.04221	1.02875	0.995238	0.68165	0.554593	0.350645	0.130609	1	0.947711	1.02681	0.937197	0.671761	0.48193	0.289037	0.136598	14.9031	-0.0914832	0	0.975932	14.2219	-0.0958813	0	0.989858	Yes	Yes	Yes	Yes	9	9	0.99202	1.03546	0.922575	0.759535	0.52876	0.316333	0.248883	0.191051	0.99202	0.91121	0.896939	0.73097	0.539876	0.317279	0.238026	0.185214
A6NDB9	PALM3	3	3	1	1.05202	1.05768	1.09593	0.747415	0.679666	0.530877	0.277433	1	1.08177	0.982955	1.06318	0.709761	0.680174	0.471243	0.242164	17.3605	-0.0698064	0	0.934676	16.6856	-0.0735719	0	0.938842	Yes	Yes	Yes	Yes	6	6	0.99202	0.916757	0.919131	0.798936	0.763876	0.772986	0.658781	0.634582	0.99202	0.975498	0.967984	0.906349	0.849747	0.728601	0.580505	0.561837
A6NDE4	RBMY1B	3	3	1	0.904893	0.886238	0.800502	0.481595	0.312768	0.12175	0.0334594	1	0.988775	0.935826	0.913146	0.541057	0.283446	0.178325	0.0762929	11.7275	-0.121675	0	0.97098	12.4738	-0.12526	0.000885052	0.994989	Yes	Yes	Yes	Yes	2	2	0.99202	0.983566	0.88528	0.599431	0.305972	0.181544	0.104021	0.044465	0.99202	1.33024	0.811538	0.7031	0.333246	0.209148	0.147584	0.092109
A6NDG6	PGP	20	20	1	1.05601	1.07585	1.07721	0.880224	1.03563	1.15499	1.13601	1	0.991906	1.04933	1.03404	0.859973	0.871929	0.925083	0.925942			1.05999	0.060407		-0.0488932	0.895434	0.770692	Yes	Yes			22	22	0.99202	0.943754	0.929345	0.938381	0.916149	0.818205	0.725087	0.581151	0.99202	0.946103	0.990623	0.884981	0.945023	0.855889	0.740064	0.54255
A6NDU8	C5orf51	5	5	1	1.02431	0.994104	1.02335	0.721456	0.489182	0.2813	0.0845169	1	1.00531	1.02713	1.01225	0.763538	0.43356	0.21794	0.0883971	14.5238	-0.110248	0	0.98814	14.306	-0.125266	0	0.997419	Yes	Yes	Yes	Yes	5	5	0.99202	0.989297	0.90394	0.8714	0.702776	0.566197	0.455392	0.390947	0.99202	1.01738	0.998688	0.926826	0.786098	0.614533	0.461055	0.330653
A6NED2	RCCD1	4	4	1	0.991553	1.08492	0.975037	0.69963	0.517617	0.274646	0.134673	1	0.953661	0.938201	0.965102	0.747557	0.495462	0.300108	0.103259	14.5518	-0.0999818	0	0.984454	14.6824	-0.105046	0	0.986138	Yes	Yes	Yes	Yes	5	5	0.99202	1.00681	0.898445	0.742786	0.587142	0.396613	0.264293	0.239152	0.99202	0.9431	0.846205	0.74154	0.520116	0.425599	0.258484	0.179297
A6NEL2	SOWAHB	1	1	1	0.878182	1.22355	0.727607	0.711591	0.670036	0.047962	0	1	0.630706	0.646834	0.768804	0.464975	0.317767	0.23003	0	15.5272	-0.299751	0	0.830102	7.25726	-0.125622	0	0.616278	Yes	Yes	Yes
A6NFI3	ZNF316	1	1	1	1.17578	1.04247	1.04071	0.492316	0.279668	0.121326	0.0969447	1	0.780469	0.942937	0.749477	0.362313	0.233397	0.124452	0	12.1559	-0.194522	0.113285	0.968385	10.8434	-0.137726	0	0.945715	Yes	Yes	Yes	Yes	1	1	0.99202	1.12738	1.02286	0.419407	0.417522	0.264469	0.21286	0.0740067	0.99202	1.01909	0.647381	0.485139	0.403664	0.16668	0.188356	0.121556
A6NGB9	WIPF3	3	3	1	1.24672	1.23916	1.14664	0.976374	0.929697	1.11183	1.17215	1	0.988822	0.934593	1.11495	0.786927	0.877943	0.898853	0.889036		0.266505	1.17215	-0.41345		-0.0704998	0.863079	0.589732	Yes	Yes			11	11	0.99202	0.973701	0.986469	0.983843	0.879312	0.769157	0.741815	0.735383	0.99202	1.01396	1.05119	0.976087	0.945192	0.922011	0.784091	0.683457
A6NHL2	TUBAL3	1	1	1	0.96587	1.33496	1.16936	1.0185	0.55815	0.19584	0	1	1.37567	1.71452	1.78119	1.19763	0.662289	0.305459	0	15.413	-0.197479	0	0.906939	16.2131	-0.185544	0	0.544443	Yes	Yes	Yes		1	1	0.99202	1.02135	0.887908	0.997797	0.889946	0.732888	0.273506	0.153804	0.99202	1.03001	1.12899	0.994438	0.64215	0.317771	0.281235	0.110709
A6NHR9	SMCHD1	58	58	1	1.0246	0.973365	0.7451	0.296004	0.101479	0.0607413	0.0476798	1	0.979693	0.96899	0.754088	0.289581	0.103759	0.0721576	0.051724	10.4117	-0.178394	0.0104959	0.999055	10.4115	-0.184642	0.0249564	0.999024	Yes	Yes	Yes	Yes	64	64	0.99202	0.817627	0.573024	0.286297	0.136982	0.0892995	0.0690864	0.0541839	0.99202	0.818067	0.512707	0.29801	0.121048	0.0904783	0.0681813	0.0527155
A6NI28	ARHGAP42	5	5	1	0.956737	1.01236	0.984573	0.659607	0.560693	0.3762	0.202753	1	1.06951	1.06804	1.03248	0.77437	0.542661	0.282203	0.24237	15.0992	-0.0805261	0	0.977244	15.0894	-0.10454	0.116474	0.981673	Yes	Yes	Yes	Yes	3	3	0.99202	1.00454	0.91431	0.747791	0.407503	0.220586	0.181985	0.141943	0.99202	0.967379	0.948161	0.73026	0.419457	0.250642	0.207186	0.110562
A6NIH7	UNC119B	11	11	1	1.07379	1.04867	1.07981	0.839676	0.887836	1.00052	0.891602	1	1.03451	1.12316	1.05614	0.820927	0.79491	0.806159	0.744774		-0.0375711	0.905836	0.493049		-0.18518	0.781934	0.85413	Yes	Yes			9	9	0.99202	0.950189	0.922982	0.84442	0.657704	0.43178	0.244589	0.177868	0.99202	0.967574	0.953469	0.899562	0.825144	0.471164	0.279475	0.190911
A6NJ78	METTL15	13	13	1	1.11228	1.07449	0.929527	0.480649	0.197633	0.0974561	0.0884679	1	0.976612	1.03862	0.997687	0.544024	0.219637	0.116164	0.0790962	11.8917	-0.176255	0.0596103	0.987232	12.3111	-0.19053	0.0760524	0.997213	Yes	Yes	Yes	Yes	8	8	0.99202	0.830418	0.615098	0.352474	0.222982	0.148868	0.0920743	0.0597137	0.99202	0.814777	0.554584	0.438995	0.253656	0.165581	0.111744	0.0641718
A6NKD9	CCDC85C	3	3	1	0.956621	1.04651	0.962262	0.69333	0.569758	0.301219	0.086033	1	1.09111	1.05492	1.06109	0.74055	0.485854	0.255911	0.0913924	14.7527	-0.0998219	0	0.970737	14.568	-0.116115	0	0.978898	Yes	Yes	Yes	Yes	6	6	0.99202	1.0627	0.931936	0.824195	0.751138	0.705074	0.642852	0.639376	0.99202	0.884838	0.870506	0.966312	0.749753	0.638109	0.594385	0.53871
A6NKF1	SAC3D1	6	6	1	1.00018	1.02408	0.972983	0.634697	0.305881	0.0827866	0.0516532	1	1.01959	1.01352	1.00328	0.651168	0.320442	0.123631	0.0559912	13.0046	-0.151856	0	0.997648	13.2038	-0.1455	0	0.997577	Yes	Yes	Yes	Yes	2	2	0.99202	0.798053	0.834491	0.68706	0.530037	0.432104	0.336113	0.235401	0.99202	0.891286	0.845392	0.645498	0.466393	0.48095	0.324655	0.195563
A6NKZ8		8	8	1	0.677924	0.813291	0.586579	0.20788	0.0633979	0.0236814	0.027468	1	0.752441	0.772716	0.707295	0.424222	0.158896	0.0562556	0.0465321	9.19447	-0.170018	0	0.879089	10.5303	-0.134481	0	0.881583	Yes	Yes	Yes	Yes	7	7	0.99202	0.852337	0.623129	0.476502	0.282908	0.140804	0.0953839	0.0712057	0.99202	0.758188	0.572712	0.657562	0.612576	0.309257	0.179619	0.120304
A6NNH0	GATSL1	1	1	1	1.0021	0.96047	0.936381	0.622596	0.226319	0.0823615	0.00456993	1	1.03185	0.942463	0.897203	0.543284	0.235457	0.0907593	0.0241639	12.6988	-0.17089	0	0.997266	12.2423	-0.150474	0	0.995214	Yes	Yes	Yes	Yes
A6NNL5	C15orf61	1	1	1	1.06765	0.923575	0.766375	0.463071	0.210402	0.12402	0.0985428	1	1.00163	0.916937	0.863097	0.520719	0.220034	0.107523	0.118363	11.3002	-0.12471	0	0.990933	11.9792	-0.137415	0.0219969	0.991786	Yes	Yes	Yes	Yes
A6NNY8	USP27X	1	1	1	1.10242	1.38467	1.22725	0.678025	0.413429	0.155686	0.0130569	1	0.863946	1.06303	0.911496	0.623019	0.326409	0.088898	0.0299228	13.8182	-0.146025	0	0.873663	12.9144	-0.142771	0	0.975687	Yes	Yes	Yes	Yes	1	1	0.99202	0.874076	0.670219	0.331503	0.184893	0.0835827	0.0576327	0	0.99202	0.574264	0.449878	0.356064	0.147904	0.106533	0.0552804	0
A7E2V4-4	ZSWIM8	5	5	1	0.95284	1.04026	0.900016	0.651125	0.403732	0.243646	0.186695	1	0.959252	1.06509	0.992967	0.612568	0.340055	0.260057	0.16437	13.6222	-0.0981719	0.0190879	0.994846	13.0034	-0.14235	0.165394	0.990415	Yes	Yes	Yes	Yes	1	1	0.99202	0.763461	0.720187	0.449845	0.27524	0.142148	0.183503	0.0943008	0.99202	0.840221	0.573718	0.44747	0.217376	0.182695	0.0716243	0.0643804
A7KAX9	ARHGAP32	12	12	1	1.06236	1.09416	1.01183	0.712365	0.470931	0.266076	0.155545	1	1.0322	1.01212	0.946282	0.639225	0.396187	0.211982	0.11431	14.4513	-0.103699	0.00305079	0.983087	13.5058	-0.111031	0	0.997349	Yes	Yes	Yes	Yes	16	16	0.99202	0.911956	0.893641	0.841378	0.664246	0.421014	0.274748	0.183691	0.99202	0.952148	0.908124	0.813173	0.681372	0.44398	0.29331	0.202628
A7MBM2	DISP2	2	2	1	1.12754	0.9697	1.01716	0.874816	0.742875	0.958475	1.43362	1	1.00664	0.918038	1.02075	0.781475	0.70261	0.5806	0.887189			1.01774	0.000959261		-0.600663	0.723466	0.695343	Yes	Yes			2	2	0.99202	0.83639	0.815947	0.575913	0.46888	0.377643	0.315597	0.144238	0.99202	0.992504	1.07732	0.833681	0.911225	0.605934	0.234838	0.172507
A8K855	EFCAB7	2	2	1	1.11043	1.08216	0.898013	0.656235	0.426985	0.412545	0.290124	1	1.01377	1.01851	0.821035	0.556542	0.362225	0.291573	0.138118	14.0887	-0.0924918	0.241858	0.968946	12.7574	-0.0939203	0	0.994182	Yes	Yes	Yes	Yes	2	2	0.99202	0.908796	0.900656	0.73779	0.601553	0.402127	0.356649	0.234077	0.99202	1.01223	0.888705	0.743452	0.66035	0.500676	0.374559	0.290344
A8MPS7	YDJC	4	4	1	1.05902	1.11073	1.08393	0.713769	0.659225	0.671702	0.516079	1	1.04152	1.10486	1.03439	0.777781	0.597496	0.555162	0.45845		-0.21213	0.615018	0.902591	19.8578	-0.0886253	0.472527	0.959648	Yes	Yes			4	4	0.99202	0.911786	0.901329	0.71775	0.542098	0.362047	0.191876	0.0917918	0.99202	1.05101	0.87699	0.676392	0.581551	0.405455	0.201832	0.125763
A8MTL9	HMSD	1	1	1	0.959285	0.961608	0.78845	0.524841	0.46472	0.464167	0.332053	1	1.06858	0.922042	0.810105	0.580516	0.444029	0.392966	0.333994	13.3988	-0.0867576	0.311597	0.982063	13.9339	-0.0706489	0.0994396	0.987467	Yes	Yes		Yes	1	1	0.99202	1.00228	0.990053	0.974919	0.850393	0.830957	0.467753	0.285766	0.99202	1.04999	1.14358	0.976635	1.01675	0.960246	0.574256	0.25054
A8MVW0	FAM171A2	2	2	1	1.01019	1.23577	1.08552	0.767378	0.625063	0.611992	0.407363	1	1.0265	1.03334	1.11377	0.887473	0.704476	0.621258	0.438021	19.082	-0.0707141	0.402466	0.851448	19.7738	-0.0619602	0.251925	0.945539	Yes	Yes		Yes	3	3	0.99202	1.16247	1.0115	0.963439	0.7867	0.700712	0.661405	0.516243	0.99202	0.942023	0.939636	0.820461	0.76394	0.63666	0.534356	0.377976
A8MWD9		9	9	1	1.16239	1.02567	1.09064	0.78782	0.765458	0.936507	0.90307	1	1.01016	1.03348	0.981517	0.731745	0.635086	0.627637	0.626874		-0.0680148	0.850596	0.558901		-0.110355	0.624282	0.995162	Yes	Yes			10	10	0.99202	1.03287	0.931733	0.945482	0.915938	0.913421	0.897751	0.767059	0.99202	1.07024	1.06211	0.944257	0.988753	0.912158	0.835967	0.720178
A8MWY0	KIAA1324L	1	1	1	1.41701	0.964728	1.14161	1.00497	0.795998	0.747612	0.55294	1	0.988692	1.01072	1.22113	0.87042	0.985437	0.640367	0.556318		-0.0532236	0.286553	0.578215		-0.167685	0.552748	0.797938	Yes	Yes			3	3	0.99202	1.16811	0.974008	0.817555	0.786442	0.858377	0.656236	0.50693	0.99202	0.778425	0.897885	0.688344	0.711999	0.771117	0.595264	0.545875
A8MXV4	NUDT19	7	7	1	0.97773	1.06886	1.03854	0.859624	0.778996	0.434835	0.11533	1	0.987141	1.06568	1.00863	0.806626	0.701342	0.363018	0.115447	17.1213	-0.131975	0	0.96947	16.2899	-0.112452	0	0.970143	Yes	Yes	Yes	Yes	18	18	0.99202	1.01301	0.996725	0.910861	0.820182	0.68179	0.43438	0.155744	0.99202	0.949679	0.973722	0.873485	0.869542	0.66426	0.402436	0.151323
A9UHW6-3	MIF4GD	6	6	1	0.960378	1.09272	1.06455	0.778904	0.741254	0.50651	0.193295	1	1.00352	1.01877	1.00922	0.815593	0.730485	0.488875	0.179113	17.2246	-0.0872988	0	0.931293	17.1193	-0.0936451	0	0.965669	Yes	Yes	Yes	Yes	7	7	0.99202	1.05656	1.02004	0.938984	0.779019	0.575152	0.36849	0.264048	0.99202	0.991925	0.967974	0.93474	0.829454	0.534211	0.34033	0.232699
B0YJ81	PTPLA	1	1	1	1.05158	1.13986	1.02323	0.6196	0.362711	0.114345	0	1	1.10066	1.13635	1.09488	0.585445	0.208177	0	0	13.172	-0.146426	0	0.974553	12.5416	-0.211648	0	0.974044	Yes	Yes	Yes	Yes
B1AJZ9-3	FHAD1	1	1	1	1.18387	1.26306	1.22893	0.937554	0.69179	0.410457	0.159688	1	1.05713	1.14369	1.19909	0.83911	0.649256	0.283875	0.138024	16.7953	-0.117738	0	0.862364	15.9066	-0.1222	0	0.934548	Yes	Yes	Yes	Yes
B1AK53	ESPN	11	11	1	1.02289	1.01802	1.00349	0.809922	0.650856	0.509929	0.453558	1	1.03273	1.04403	1.00304	0.768995	0.54156	0.461409	0.376805	18.5737	-0.0692591	0.360857	0.994149	15.8931	-0.0934078	0.352624	0.991157	Yes	Yes			9	9	0.99202	0.93089	0.853325	0.703754	0.573194	0.445665	0.405917	0.363228	0.99202	1.01319	0.884001	0.722121	0.631253	0.489755	0.445076	0.37377
B2RTY4-4	MYO9A	2	2	1	0.980117	1.01909	0.94331	0.60283	0.534096	0.546274	0.437149	1	1.0575	1.04666	0.886357	0.63264	0.496899	0.4675	0.399089	17.6321	-0.129649	0.492146	0.984198	14.916	-0.0901116	0.38208	0.98744	Yes	Yes			2	2	0.99202	0.710633	0.593175	0.354278	0.31617	0.16755	0.1836	0.078789	0.99202	0.8592	0.572921	0.434451	0.246409	0.140952	0.163631	0.0996788
B3EWF7	EPM2A	1	1	1	0.809647	0.724656	0.796002	0.679727	0.609052	0.662828	0.529331	1	0.963429	1.10078	0.950454	0.81789	0.621967	0.665272	0.421166			0.156022	0.822217	19.9314	-0.0477637	0	0.921255	Yes	Yes		Yes
B4E2M5	ANKRD66	2	2	1	1.07239	1.06137	1.02711	0.561135	0.423239	0.192957	0.125557	1	0.926488	1.07936	1.07106	0.845206	0.727306	0.854942	0.434425	13.2306	-0.120494	0.0583017	0.974063		-0.0463246	0	0.750852	Yes	Yes	Yes		4	4	0.99202	0.90896	0.670005	0.565598	0.280996	0.144039	0.0975702	0.0524991	0.99202	0.856529	0.691741	0.691057	0.832401	0.417537	0.251556	0.14076
B5ME19	EIF3CL	70	70	1	1.01323	1.02173	0.933265	0.56129	0.188736	0.0430142	0.0256005	1	1.00725	1.00215	0.918329	0.534485	0.184851	0.0521001	0.0289636	12.3169	-0.18005	0	0.998723	12.1531	-0.172912	0	0.999236	Yes	Yes	Yes	Yes	78	78	0.99202	1.03181	1.01925	0.660053	0.376857	0.231623	0.150978	0.0897436	0.99202	1.11872	1.01411	0.676762	0.336545	0.220129	0.149509	0.0917753
C9JI98	TMEM238	2	2	1	1.18475	1.17214	1.13433	0.760077	0.557196	0.352041	0.214156	1	0.96283	1.12946	0.99828	0.715335	0.486754	0.325148	0.28745	15.4428	-0.0981204	0.0827406	0.911497	14.4854	-0.106768	0.228023	0.973924	Yes	Yes	Yes	Yes
C9JLW8	FAM195B	9	9	1	0.861506	1.02343	1.00985	0.732253	0.882047	1.06208	1.11984	1	0.975002	0.982113	0.974987	0.842741	0.823695	0.909475	0.936365		-0.0286443	0.950327	-0.0185973		-0.304624	0.878069	0.692831	Yes	Yes			10	10	0.99202	0.871588	0.980548	1.06666	0.997419	1.04296	1.06829	1.10149	0.99202	0.906632	0.850494	0.975238	1.2067	1.19706	1.01768	1.0819
F8VTS6	RFPL4AL1	1	1	1	1.02375	1.07047	1.03019	0.570248	0.171786	0	0.00439431	1	1.11896	1.28825	1.32169	0.739777	0.325987	0	0	12.39	-0.219198	0	0.993523	13.5308	-0.199016	0	0.8979	Yes	Yes	Yes	Yes
O00115	DNASE2	6	6	1	0.989687	1.02212	1.0311	0.83003	1.04514	1.18197	1.17823	1	1.03184	1.12191	1.08557	0.962438	0.952957	1.16151	1.12368		0.392542	1.1801	0.652644		0.45796	1.06801	0.103989	Yes	Yes			8	8	0.99202	1.03636	0.969879	0.911653	0.917723	0.856199	0.844342	0.855537	0.99202	0.968522	0.985422	0.877697	0.914371	0.83209	0.772693	0.708996
O00116	AGPS	28	28	1	1.02416	1.0157	0.956286	0.669805	0.383224	0.180609	0.0849191	1	1.05498	1.05935	1.019	0.726136	0.429578	0.184673	0.0894593	13.5462	-0.122579	0	0.998055	14.0696	-0.126572	0	0.990966	Yes	Yes	Yes	Yes	37	37	0.99202	0.98207	0.865828	0.641693	0.325038	0.168224	0.107894	0.0567449	0.99202	0.950119	0.840735	0.621185	0.312816	0.17134	0.109111	0.0567422
O00124	UBXN8	1	1	1	1.03611	0.95776	1.10189	0.604614	0.436317	0.241677	0.10904	1	0.817143	0.77058	0.72768	0.550137	0.326442	0.209503	0.0617164	13.6866	-0.118595	0.051195	0.96511	11.4976	-0.0979661	0	0.881923	Yes	Yes	Yes	Yes	2	2	0.99202	0.873924	0.799629	0.561948	0.425561	0.312105	0.213776	0.128623	0.99202	0.956792	0.816321	0.62905	0.420159	0.29587	0.20411	0.142525
O00139-4	KIF2A	19	19	1	1.02975	1.03702	0.882093	0.409628	0.144411	0.0532748	0.0472746	1	0.991333	0.972945	0.868542	0.429418	0.156598	0.0685223	0.0427778	11.4073	-0.178377	0.00950285	0.99824	11.4733	-0.164733	0	0.999384	Yes	Yes	Yes	Yes	17	17	0.99202	0.886187	0.658436	0.452932	0.276013	0.192959	0.135684	0.0994812	0.99202	0.889476	0.619855	0.426562	0.263518	0.181587	0.136863	0.102579
O00142	TK2	5	5	1	0.404315	0.36052	0.396475	0.330425	0.234458	0.152537	0.10662	1	1.08797	0.766981	0.691916	0.511007	0.38395	0.310749	0.163586	2.55293		0	0.910447	11.243	-0.083548	0	0.953626	Yes	Yes		Yes	4	4	0.99202	0.980553	0.933277	0.825251	0.753182	0.63029	0.469533	0.309773	0.99202	0.92468	0.950835	0.796952	0.774935	0.624689	0.488743	0.29239
O00148	DDX39A	12	12	1	1.35339	1.55905	1.57695	1.00325	0.522966	0.310297	0.179369	1	1.04226	1.16919	1.22752	0.791002	0.408378	0.21073	0.126577	15.221	-0.199531	0.209944	0.633345	14.1829	-0.154543	0.101773	0.935824	Yes	Yes		Yes	15	15	0.99202	0.923171	0.864095	0.673901	0.504417	0.358521	0.286502	0.180387	0.99202	0.988367	0.828955	0.662668	0.489862	0.340786	0.226781	0.151921
O00151	PDLIM1	20	20	1	0.981853	1.03193	0.978544	0.815533	0.884911	1.0541	1.00416	1	0.983381	1.00779	0.954238	0.803552	0.782119	0.795002	0.780236		-0.145916	0.939677	0.164139		-0.0752593	0.785069	0.993954	Yes	Yes			25	25	0.99202	0.988717	0.980228	0.969487	0.909401	0.829923	0.767727	0.784127	0.99202	0.943763	0.964699	0.909941	0.932313	0.847641	0.728343	0.695546
O00154-7	ACOT7	42	42	1	1.02657	1.05224	1.00037	0.77991	0.718331	0.495776	0.138958	1	1.01817	1.04284	0.974619	0.77627	0.61908	0.402062	0.149477	16.8634	-0.0927298	0	0.943396	15.8801	-0.0912443	0	0.979311	Yes	Yes	Yes	Yes
O00159	MYO1C	44	44	1	1.04033	1.06555	0.868176	0.400368	0.132309	0.0534357	0.0439862	1	1.07071	1.0922	0.878534	0.393684	0.135918	0.0683838	0.0489093	11.3152	-0.17815	0.00519603	0.995779	11.3088	-0.184342	0.0231405	0.991119	Yes	Yes	Yes	Yes	23	23	0.99202	0.982835	0.797173	0.424697	0.22796	0.138562	0.0907701	0.0562544	0.99202	1.25161	0.716591	0.535624	0.226446	0.149332	0.122631	0.0820919
O00161	SNAP23	14	14	1	1.09941	1.1214	1.11579	0.860934	0.904201	0.884169	0.769817	1	1.04035	1.06789	1.00118	0.827013	0.784953	0.796894	0.623482		-0.0197071	0.591533	0.58773		-0.0291405	0.270693	0.8904	Yes	Yes			13	13	0.99202	0.953905	1.00622	1.00775	0.897882	0.790071	0.721206	0.671136	0.99202	0.950374	0.965926	0.926466	0.83927	0.794708	0.679587	0.613014
O00165-2	HAX1	4	4	1	1.00239	1.00872	0.818384	0.544688	0.220966	0.106104	0.0678364	1	1.01328	0.965266	0.937636	0.579282	0.239618	0.113737	0.0632665	11.9633	-0.133459	0	0.995089	12.5332	-0.150727	0.0091529	0.998883	Yes	Yes	Yes	Yes
O00170	AIP	24	24	1	0.957811	1.00839	0.961391	0.824856	0.891912	0.929129	0.650862	1	1.02333	1.02438	0.983384	0.826476	0.77132	0.833147	0.567018		-0.0199897	0	0.60918		-0.030069	0	0.856013	Yes	Yes			23	23	0.99202	0.979546	0.929287	0.850739	0.705231	0.416727	0.213603	0.112374	0.99202	0.932444	0.954575	0.819909	0.706806	0.419278	0.182082	0.101193
O00178	GTPBP1	16	16	1	1.07593	1.05188	1.01686	0.71652	0.528756	0.293463	0.0947955	1	1.02886	1.05301	0.963529	0.73701	0.470114	0.252302	0.10428	14.7275	-0.105452	0	0.977949	14.3974	-0.11082	0	0.993569	Yes	Yes	Yes	Yes	22	22	0.99202	0.947115	0.861856	0.610597	0.441083	0.255977	0.139937	0.0881411	0.99202	0.961222	0.841974	0.627551	0.400448	0.25383	0.144225	0.0889166
O00186	STXBP3	20	20	1	1.00802	1.03572	0.93719	0.631644	0.331798	0.177284	0.116234	1	0.986086	1.03223	0.948071	0.601575	0.297202	0.138445	0.0961827	13.1267	-0.124292	0.0241102	0.998691	12.8221	-0.138245	0.0269244	0.998636	Yes	Yes	Yes	Yes	16	16	0.99202	0.940053	0.85415	0.566215	0.366213	0.224776	0.132979	0.0765186	0.99202	0.95177	0.837808	0.617491	0.328378	0.197541	0.128565	0.0765139
O00189	AP4M1	6	6	1	1.11011	1.17917	1.06431	0.611381	0.28474	0.233039	0.13252	1	0.966492	1.05571	0.922514	0.563522	0.268644	0.167671	0.0978133	12.7048	-0.192311	0.171529	0.959052	12.5034	-0.138299	0.0479661	0.995984	Yes	Yes	Yes	Yes	6	6	0.99202	0.882669	0.757262	0.535004	0.34537	0.2019	0.128149	0.0807621	0.99202	0.931481	0.749682	0.545163	0.335565	0.207597	0.152236	0.0795851
O00192	ARVCF	9	9	1	1.09577	1.00331	0.957343	0.521448	0.251909	0.132413	0.104407	1	1.05454	1.04542	0.893161	0.515109	0.250614	0.154607	0.0926845	12.2301	-0.164442	0.0822932	0.992056	12.1378	-0.138159	0.0399906	0.995633	Yes	Yes	Yes	Yes	6	6	0.99202	0.852832	0.738757	0.471125	0.36438	0.23366	0.158201	0.118837	0.99202	0.871161	0.624169	0.515619	0.333425	0.219645	0.193027	0.107121
O00193	SMAP	8	8	1	0.930455	0.91089	0.936797	0.800857	0.966425	1.09832	1.1458	1	1.03095	1.0041	0.9902	0.891431	0.930549	1.02417	0.953891						-0.118629	0.95001	0.378641	No	Yes			9	9	0.99202	1.00054	0.914257	0.942985	0.906701	0.939771	0.885702	0.966072	0.99202	0.959033	1.00547	0.90766	0.967058	0.894531	0.825903	0.797335
O00203	AP3B1	50	50	1	1.03383	1.04373	0.934665	0.537792	0.20501	0.0882558	0.0528961	1	1.00273	1.00848	0.908141	0.536632	0.205824	0.0826307	0.0513457	12.2378	-0.163569	0.0107582	0.997743	12.1817	-0.156245	0	0.999575	Yes	Yes	Yes	Yes	59	59	0.99202	0.938706	0.857829	0.599781	0.344746	0.210248	0.149948	0.0766216	0.99202	0.956593	0.845804	0.589365	0.324507	0.198982	0.134865	0.0752574
O00212	RHOD	2	2	1	0.979875	1.05486	1.01697	0.542377	0.375043	0.16181	0.134444	1	1.04026	1.25231	1.22088	0.834394	0.418866	0.236639	0.167951	12.7744	-0.140098	0.103057	0.983307	14.3279	-0.162162	0.153985	0.913045	Yes	Yes	Yes	Yes	2	2	0.99202	0.766352	0.538252	0.546502	0.249715	0.12301	0.105142	0.0266038	0.99202	0.868208	0.601643	0.507404	0.324567	0.196293	0.0812141	0.0538195
O00213	APBB1	4	4	1	1.05895	1.06774	1.17103	0.721723	0.559538	0.495314	0.322665	1	1.02529	1.07331	0.974307	0.679737	0.435012	0.304928	0.244455	15.6215	-0.100956	0.358463	0.916803	13.9406	-0.111454	0.191112	0.991881	Yes	Yes		Yes	3	3	0.99202	0.902038	0.831847	0.679319	0.476379	0.345066	0.285225	0.260048	0.99202	0.967945	0.743532	0.662623	0.461824	0.324308	0.23561	0.144727
O00214-2	LGALS8	10	10	1	0.929057	0.977863	0.960337	0.753496	0.65238	0.473108	0.231467	1	0.975112	1.02352	0.987754	0.787507	0.659614	0.460688	0.227999	16.5585	-0.0732371	0	0.963498	16.6634	-0.0789684	0	0.980809	Yes	Yes	Yes	Yes	9	9	0.99202	1.0002	0.9436	0.765158	0.521102	0.277741	0.182909	0.110113	0.99202	0.991668	0.956116	0.807282	0.529001	0.297954	0.187734	0.123537
O00217	NDUFS8	11	11	1	0.983065	0.94634	0.901893	0.588678	0.300917	0.116135	0.0792209	1	1.01899	1.02358	0.94131	0.634386	0.318249	0.151636	0.075413	12.6685	-0.131486	0	0.995871	13.0799	-0.131558	0	0.999013	Yes	Yes	Yes	Yes	16	16	0.99202	0.920001	0.862273	0.729342	0.615581	0.526174	0.464916	0.465942	0.99202	0.923966	0.876206	0.746905	0.672992	0.545979	0.490983	0.456288
O00219	HAS3	2	2	1	0.960631	0.948171	0.900009	0.449656	0.298269	0.149611	0.0712658	1	1.0278	1.03097	1.00143	0.749768	0.409172	0.250769	0.125713	11.9643	-0.13237	0.0237108	0.990548	14.1769	-0.1211	0.0434954	0.996568	Yes	Yes	Yes	Yes
O00220	TNFRSF10A	10	10	1	1.01458	1.01305	1.00864	0.775249	0.875574	1.00579	0.893836	1	1.05014	1.08384	0.983348	0.809685	0.830473	0.801715	0.758189		-0.0955446	0.887718	0.514706		-0.0821016	0.795093	0.893871	Yes	Yes			13	13	0.99202	0.914674	0.897815	0.938543	0.872772	0.808087	0.791759	0.813513	0.99202	0.939433	0.976015	0.933932	0.943596	0.884226	0.832557	0.772186
O00221	NFKBIE	7	7	1	1.04489	1.0995	1.00394	0.776542	0.72315	0.703945	0.430337	1	0.969084	1.03484	0.899648	0.757215	0.645955	0.496031	0.310777		-0.0453999	0	0.899132	17.1007	-0.0612359	0	0.978737	Yes	Yes		Yes	4	4	0.99202	1.01792	0.867169	0.990606	0.623476	0.449436	0.339967	0.26774	0.99202	0.895357	0.936894	0.799333	0.626008	0.415615	0.293436	0.198451
O00231-2	PSMD11	67	67	1	1.0462	1.05369	0.99756	0.741462	0.374712	0.0993331	0.0404462	1	0.990453	0.953036	0.894702	0.691986	0.373774	0.107062	0.0368083	13.7457	-0.155107	0	0.993747	13.4214	-0.139159	0	0.988514	Yes	Yes	Yes	Yes
O00232-2	PSMD12	1	1	1	1.03364	0.994662	0.955679	0.659105	0.279996	0.0556709	0	1	0.972662	0.937224	0.798884	0.627868	0.396414	0.0626693	0.00250091	12.9969	-0.171224	0	0.996083	12.7984	-0.12765	0	0.958628	Yes	Yes	Yes	Yes	1	1	0.99202	0.844463	0.820852	0.621206	0.353826	0.267666	0.126565	0.0644023	0.99202	1.00621	0.836773	0.626771	0.406304	0.237804	0.147227	0.0793475
O00232	PSMD12	48	48	1	1.01751	1.04221	1.011	0.734763	0.393056	0.102641	0.0455416	1	1.02257	1.04179	1.01524	0.765421	0.44457	0.135243	0.0493382	13.7974	-0.150831	0	0.994319	14.1838	-0.144168	0	0.99333	Yes	Yes	Yes	Yes	48	48	0.99202	0.922961	0.839703	0.639968	0.42542	0.246644	0.144423	0.0704745	0.99202	0.950679	0.830222	0.660901	0.421673	0.238078	0.152639	0.0762698
O00233	PSMD9	18	18	1	0.972501	1.08455	1.063	0.840244	0.963244	1.13392	1.16079	1	0.980622	1.00833	0.99992	0.865226	0.846917	0.910579	0.967519		0.158645	1.04096	0.0536862		-0.296897	0.89756	0.68503	Yes	Yes			18	18	0.99202	0.989814	0.929659	0.917609	0.902962	0.851479	0.807001	0.857965	0.99202	1.00063	0.964131	0.950295	1.05544	0.993198	0.878264	0.852714
O00244	ATOX1	8	8	1	1.03669	1.04405	0.977567	0.911157	0.99053	1.16824	0.977829	1	1.05912	1.0263	0.930333	0.742096	0.695651	0.725284	0.62218		0.00775118	1.06111	0.108165		-0.0685833	0.664033	0.955788	Yes	Yes			12	12	0.99202	0.963397	1.05609	1.16479	1.14325	1.00267	0.961432	0.980447	0.99202	0.967732	1.03654	0.970301	1.12567	0.964222	0.900407	0.884817
O00255	MEN1	5	5	1	0.974749	0.980439	0.892713	0.513575	0.297918	0.202672	0.119412	1	0.990753	1.04016	0.929531	0.572709	0.301345	0.222123	0.142337	12.2704	-0.125648	0.0663616	0.997876	12.6391	-0.13372	0.109375	0.997497	Yes	Yes	Yes	Yes	6	6	0.99202	0.896682	0.778774	0.523286	0.357504	0.234485	0.168681	0.0994426	0.99202	0.972819	0.70811	0.597228	0.347071	0.24866	0.166446	0.0948629
O00257	CBX4	6	6	1	1.23762	1.27269	1.12227	0.717649	0.47552	0.448112	0.350967	1	0.997257	1.03444	0.936138	0.618852	0.389708	0.282278	0.24877	13.9749	-0.160374	0.401451	0.846118	13.2402	-0.118341	0.203061	0.998332	Yes	Yes		Yes
O00258	WRB	3	3	1	0.975762	0.973195	0.896143	0.481857	0.274295	0.111646	0.067702	1	0.996584	1.02534	0.961108	0.576067	0.261608	0.122229	0.0822086	12.047	-0.135482	0	0.99702	12.5798	-0.154187	0.0402903	0.999109	Yes	Yes	Yes	Yes	2	2	0.99202	0.885913	0.704274	0.458087	0.330958	0.197592	0.110017	0.0770233	0.99202	0.861796	0.652516	0.500096	0.292178	0.174801	0.130398	0.0814705
O00264	PGRMC1	10	10	1	1.06301	1.12509	1.07732	0.861892	1.01566	1.20872	1.17413	1	1.00662	1.07421	1.03905	0.858418	0.881096	1.05467	1.01179			1.07713	0.0606376		-0.0313074	0.952075	0.193054	Yes	Yes			11	11	0.99202	0.971133	0.969156	0.842004	0.906828	0.842452	0.735908	0.762815	0.99202	1.02688	0.992893	0.892266	0.957238	0.869207	0.740478	0.712566
O00267	SUPT5H	53	53	1	1.01257	1.02002	1.0088	0.771058	0.53963	0.171525	0.0498938	1	1.01531	1.04343	1.01097	0.80826	0.545508	0.196089	0.0695334	14.6977	-0.134179	0	0.986553	14.9402	-0.13418	0	0.99098	Yes	Yes	Yes	Yes	53	53	0.99202	0.974201	0.917634	0.847178	0.664646	0.332844	0.195327	0.111939	0.99202	0.963341	0.970047	0.830855	0.704482	0.342287	0.202492	0.123473
O00268	TAF4	13	13	1	0.973977	1.02445	1.00199	0.731368	0.511002	0.305637	0.163865	1	0.988468	0.966642	0.935882	0.666823	0.441124	0.244278	0.129085	14.8466	-0.097178	0	0.993655	13.8855	-0.102975	0	0.996291	Yes	Yes	Yes	Yes	13	13	0.99202	0.905609	1.03248	0.972895	0.70033	0.467467	0.325067	0.227192	0.99202	1.08661	0.999973	0.994182	0.704998	0.445713	0.297486	0.201939
O00273	DFFA	17	17	1	1.18792	1.22868	1.20167	0.976114	1.14451	1.26327	0.973312	1	1.01462	1.142	1.09396	0.939003	0.907939	0.944868	0.787552			1.27871	0.168553			0	0.567593	Yes	Yes			17	17	0.99202	0.94675	0.876211	0.912557	0.87145	0.791036	0.727603	0.697872	0.99202	0.976411	0.963239	0.905062	0.920386	0.812591	0.744105	0.64049
O00287	RFXAP	1	1	1	0.955224	1.04257	1.10038	0.870518	0.63546	0.656204	0.718543	1	0.987905	0.82545	0.830191	0.694201	0.618843	0.602921	0.419798		-0.740271	0.670069	0.923548		-0.0451249	0	0.922331	Yes	Yes			2	2	0.99202	1.09146	1.07925	0.767036	0.641749	0.60567	0.623734	0.663716	0.99202	0.962544	1.08258	0.913731	0.839753	0.62591	0.637358	0.556051
O00291	HIP1	16	16	1	1.01167	1.07099	1.01152	0.668956	0.372063	0.135827	0.0410928	1	1.03505	1.06595	1.0143	0.697153	0.385749	0.157668	0.0548241	13.4718	-0.140134	0	0.991216	13.6929	-0.136229	0	0.992005	Yes	Yes	Yes	Yes	13	13	0.99202	1.01266	0.893001	0.774593	0.583937	0.439361	0.364986	0.253548	0.99202	0.915258	0.857083	0.786416	0.732169	0.591561	0.440426	0.284941
O00299	CLIC1	56	56	1	1.05702	1.17757	1.15873	0.93836	1.06342	1.06595	0.518212	1	0.999965	1.06743	1.06819	0.893927	0.878434	0.922146	0.502863		0	0	0.762836		-0.164563	0	0.852168	Yes	Yes			44	44	0.99202	0.975698	0.928331	0.872089	0.705422	0.442227	0.278988	0.179891	0.99202	0.96985	1.00245	0.865733	0.766245	0.459193	0.291204	0.1816
O00303	EIF3F	36	36	1	0.946841	0.968086	0.910366	0.656094	0.370679	0.131537	0.0355212	1	1.03367	1.03641	0.973282	0.714012	0.394938	0.167751	0.0454977	13.2627	-0.132375	0	0.989754	13.7772	-0.134263	0	0.995354	Yes	Yes	Yes	Yes	35	35	0.99202	1.01628	1.07235	0.878507	0.550426	0.336785	0.227445	0.124833	0.99202	1.11056	1.09964	0.853234	0.544636	0.318945	0.215371	0.130886
O00308	WWP2	3	3	1	0.942508	1.02873	0.926673	0.658025	0.432435	0.235682	0.0949809	1	0.970066	0.964522	0.951539	0.601444	0.384926	0.257873	0.14397	13.732	-0.107443	0	0.990827	13.3211	-0.108332	0.0525195	0.993937	Yes	Yes	Yes	Yes	1	1	0.99202	0.923233	1.00223	0.773488	0.407631	0.288864	0.308246	0.193331	0.99202	1.31929	1.2826	0.850051	0.540228	0.382785	0.265968	0.212431
O00311	CDC7	2	2	1	1.03983	0.940263	0.864696	0.524659	0.214682	0.101835	0.105474	1	1.06711	1.02759	0.896893	0.516608	0.201846	0.100869	0.0253586	12.0055	-0.138439	0.0095208	0.993748	12.0538	-0.154852	0	0.995461	Yes	Yes	Yes	Yes	2	2	0.99202	0.924522	0.863852	0.775169	0.439044	0.300525	0.211501	0.118823	0.99202	0.916259	0.723937	0.574337	0.478602	0.411398	0.235281	0.150984
O00327	ARNTL	2	2	1	0.964965	0.963006	0.833985	0.600771	0.374255	0.302107	0.236748	1	1.00648	1.0392	0.847139	0.696217	0.455764	0.270135	0.206322	13.1708	-0.087623	0.0581044	0.996143	14.0708	-0.0872187	0	0.99118	Yes	Yes	Yes	Yes	3	3	0.99202	0.921415	0.955846	0.802996	0.725485	0.557094	0.495541	0.470731	0.99202	0.906352	0.86379	0.664018	0.661269	0.585224	0.422028	0.36322
O00329	PIK3CD	3	3	1	0.96336	0.960283	0.95938	0.728021	0.522346	0.420707	0.113071	1	0.972667	0.986307	0.969004	0.682862	0.517931	0.330209	0.156576	15.1102	-0.0890523	0	0.967145	14.6691	-0.0905399	0	0.988888	Yes	Yes	Yes	Yes	3	3	0.99202	0.906833	0.842285	0.811296	0.510946	0.568551	0.309454	0.0640255	0.99202	1.10234	1.00118	0.794662	0.602323	0.675433	0.385482	0.0904201
O00330	PDHX	19	19	1	0.999584	0.992495	0.945139	0.784574	0.796133	0.698252	0.24362	1	1.01298	1.01394	0.967245	0.825172	0.747368	0.663342	0.277815	18.7797	-0.0823125	0	0.857676	18.6614	-0.0696541	0	0.921585	Yes	Yes	Yes	Yes	22	22	0.99202	0.907969	0.982566	0.820319	0.748574	0.643383	0.497486	0.24142	0.99202	1.2636	0.985996	1.13539	0.990479	0.789785	0.597358	0.282716
O00391	QSOX1	2	2	1	1.1554	1.14521	0.902496	0.429975	0.295002	0.378229	0.339053	1	0.845109	0.70243	0.655781	0.44015	0.308162	0.211065	0.216722	11.1954	-0.216415	0.335515	0.950777	9.68313	-0.0952328	0	0.922847	Yes	Yes		Yes
O00399	DCTN6	12	12	1	0.916764	0.97701	0.951514	0.764465	0.807579	0.904177	0.833781	1	1.00495	0.990235	0.989734	0.800424	0.745793	0.783083	0.728901		-0.464151	0.8275	0.644581		-0.0889783	0.75131	0.984769	Yes	Yes			12	12	0.99202	1.01066	0.939254	0.921261	0.872869	0.775091	0.725707	0.682985	0.99202	0.976144	0.986664	0.914464	0.971905	0.867201	0.774515	0.654384
O00400	SLC33A1	7	7	1	0.872919	1.00502	0.932535	0.599365	0.329779	0.156821	0.0635256	1	0.988967	1.05449	0.988448	0.673346	0.344654	0.168584	0.0668232	12.9212	-0.127816	0	0.983262	13.4384	-0.133813	0	0.996159	Yes	Yes	Yes	Yes	6	6	0.99202	0.87479	0.756672	0.562897	0.337347	0.226258	0.151767	0.0631648	0.99202	0.998907	0.806222	0.597393	0.355926	0.255563	0.190517	0.0943472
O00401	WASL	12	12	1	0.960779	1.07644	1.01861	0.809081	0.854111	0.852625	0.416538	1	0.984971	0.953172	0.934563	0.798349	0.758235	0.708703	0.38764	20.4619	-0.134099	0	0.794003	20.6876	-0.047393	0	0.890147	Yes	Yes		Yes	13	13	0.99202	0.96763	0.885979	0.762278	0.521198	0.321102	0.187347	0.114595	0.99202	0.940503	0.946723	0.779217	0.574612	0.340609	0.21265	0.114628
O00410-2	IPO5	1	1	1	0.980021	0.970273	0.939586	0.791318	0.688404	0.469503	0.0274005	1	1.15052	1.00386	0.90385	0.70091	0.658661	0.397158	0.100542	16.4273	-0.112238	0	0.923837	15.5087	-0.0862933	0	0.920523	Yes	Yes	Yes	Yes
O00410-3	IPO5	121	121	1	1.05743	1.10068	1.07051	0.889968	0.815402	0.583803	0.108047	1	1.03764	1.05898	1.00505	0.794502	0.663323	0.443811	0.126492	18.0253	-0.148605	0	0.940304	16.3382	-0.0959134	0	0.963389	Yes	Yes	Yes	Yes	116	116	0.99202	0.974098	0.922775	0.757621	0.630017	0.45057	0.303094	0.199808	0.99202	0.953407	0.903621	0.730881	0.585656	0.391266	0.270869	0.177831
O00411	POLRMT	42	42	1	0.987034	0.964627	0.788615	0.404346	0.197573	0.103709	0.0671607	1	1.0226	0.967401	0.78476	0.403699	0.187938	0.0933543	0.0563479	11.1413	-0.139297	0	0.999232	11.0981	-0.142924	0	0.99892	Yes	Yes	Yes	Yes	16	16	0.99202	0.775368	0.607993	0.357857	0.22792	0.144909	0.0945728	0.0682652	0.99202	0.930603	0.518278	0.391254	0.212208	0.15019	0.121498	0.0841484
O00418	EEF2K	6	6	1	0.851531	0.798846	0.782778	0.488241	0.222101	0.0545083	0.0123272	1	1.03851	0.966339	0.906801	0.595192	0.268103	0.0781732	0.0270973	11.4224	-0.138707	0	0.931785	12.6019	-0.151314	0	0.995127	Yes	Yes	Yes	Yes	9	9	0.99202	0.912039	0.72047	0.483883	0.290466	0.201523	0.136518	0.0874334	0.99202	0.888863	0.652994	0.47151	0.276497	0.193476	0.138676	0.0859243
O00422	SAP18	6	6	1	0.977987	0.949876	0.800665	0.516131	0.2893	0.111923	0.0216225	1	0.960715	0.891978	0.809888	0.51422	0.268768	0.112875	0.0441927	11.8674	-0.126758	0	0.98895	11.8384	-0.126869	0	0.983861	Yes	Yes	Yes	Yes	10	10	0.99202	1.01396	1.00854	0.874459	0.736807	0.545299	0.413028	0.308744	0.99202	1.07557	1.01176	0.938672	0.768791	0.555452	0.433053	0.308376
O00423-3	EML1	8	8	1	0.98291	0.980635	0.912311	0.604302	0.356111	0.190539	0.0525454	1	1.02398	1.05539	0.966284	0.62569	0.342293	0.194595	0.0745578	13.0198	-0.119885	0	0.995198	13.2203	-0.124094	0	0.994764	Yes	Yes	Yes	Yes	5	5	0.99202	0.983843	0.840525	0.745969	0.58598	0.362784	0.261795	0.115329	0.99202	1.02772	0.878637	0.725518	0.612973	0.495975	0.280255	0.136231
O00425	IGF2BP3	23	23	1	0.979211	0.994902	0.935655	0.574142	0.259714	0.0946947	0.0455986	1	0.997758	1.039	0.974921	0.628281	0.287295	0.125118	0.0555079	12.5446	-0.149835	0	0.999121	12.9695	-0.146425	0	0.998318	Yes	Yes	Yes	Yes	17	17	0.99202	1.22968	1.3043	0.903864	0.491115	0.270601	0.169818	0.08878	0.99202	1.49901	1.27981	1.00317	0.545409	0.308106	0.199623	0.13102
O00429-2	DNM1L	48	48	1	1.00035	1.03283	0.963143	0.619388	0.276324	0.0910354	0.0440067	1	1.0105	1.01267	0.93716	0.627196	0.285993	0.111827	0.0476201	12.8459	-0.154529	0	0.99854	12.8921	-0.146013	0	0.999157	Yes	Yes	Yes	Yes	45	45	0.99202	0.973453	0.826486	0.499678	0.258476	0.148448	0.0965645	0.0622111	0.99202	0.934896	0.829043	0.506975	0.251817	0.149971	0.105923	0.0660777
O00442-2	RTCA	14	14	1	1.15372	1.21734	1.20665	0.932976	0.900678	0.717215	0.0698614	1	1.01235	1.10298	1.06232	0.849361	0.715929	0.529177	0.0766119	18.716	-0.308535	0	0.871751	17.1042	-0.115383	0	0.932467	Yes	Yes	Yes	Yes	23	23	0.99202	0.964711	0.924855	0.875953	0.764618	0.632125	0.430754	0.179336	0.99202	0.976596	0.935101	0.826203	0.792477	0.61182	0.404016	0.1611
O00443	PIK3C2A	21	21	1	1.2163	1.31323	1.17068	0.667256	0.370823	0.212314	0.125681	1	1.18298	1.31442	1.17802	0.650253	0.34273	0.212491	0.143623	13.4455	-0.154309	0.1266	0.884436	13.1174	-0.175502	0.164329	0.890445	Yes	Yes	Yes	Yes	5	5	0.99202	0.75865	0.576169	0.47919	0.339435	0.285115	0.22635	0.169807	0.99202	0.842513	0.568413	0.438376	0.312473	0.253244	0.223194	0.175223
O00458	IFRD1	5	5	1	1.07812	1.11313	1.04042	0.78863	0.68964	0.572593	0.196144	1	1.09134	1.09267	1.06389	0.781391	0.623845	0.457441	0.176271	17.319	-0.0787404	0	0.917797	16.3015	-0.0869708	0	0.951305	Yes	Yes	Yes	Yes
O00459	PIK3R2	17	17	1	1.0045	1.02113	0.966301	0.629003	0.324676	0.13601	0.0935102	1	0.996033	1.06045	1.00238	0.676833	0.353797	0.159016	0.0906786	13.0864	-0.13507	0.0116341	0.998697	13.4779	-0.13514	0.0149835	0.995219	Yes	Yes	Yes	Yes	12	12	0.99202	0.959736	0.815377	0.500207	0.229026	0.136678	0.0982107	0.0656087	0.99202	0.961695	0.800834	0.516965	0.217537	0.127854	0.0854411	0.0652412
O00461	GOLIM4	12	12	1	1.02837	1.01599	1.01851	0.823803	0.876232	0.993224	0.95433	1	1.00538	1.03999	1.00665	0.842078	0.830372	0.82763	0.783611		-0.054084	0.912266	0.509446		-0.102611	0.813627	0.960334	Yes	Yes			9	9	0.99202	1.01968	0.916145	0.7842	0.665014	0.608257	0.512657	0.44224	0.99202	0.938191	0.903764	0.8139	0.809547	0.659789	0.574626	0.496189
O00462	MANBA	17	17	1	1.05236	1.09802	1.05899	0.76491	0.661967	0.691908	0.621244	1	0.984426	1.03126	0.987029	0.742916	0.606397	0.492177	0.458661		-0.26814	0.658331	0.935805	17.9224	-0.078676	0.41828	0.992356	Yes	Yes			16	16	0.99202	0.906215	0.870749	0.711356	0.606584	0.472127	0.329989	0.169886	0.99202	0.944426	0.86504	0.71031	0.605425	0.478571	0.311727	0.172448
O00468	AGRN	2	2	1	2.14498	2.29815	1.9032	1.04433	0.945391	1.04672	0.291336	1	0.835953	1.2727	1.24371	0.835099	0.541211	0.377691	0.166811	20.9151	0	0	-0.11427	15.6451	-0.108939	0.0640137	0.845191	Yes	Yes		Yes	7	7	0.99202	0.908257	0.897817	0.818172	0.645349	0.470318	0.362233	0.237625	0.99202	0.967989	0.884592	0.775927	0.589907	0.513425	0.342229	0.223119
O00469-2	PLOD2	8	8	1	1.03147	1.05435	1.0042	0.723006	0.500855	0.221033	0.0661215	1	1.00083	1.10104	1.02575	0.768575	0.485593	0.20518	0.0801765	14.4012	-0.118783	0	0.986364	14.5284	-0.126509	0	0.985964	Yes	Yes	Yes	Yes	12	12	0.99202	0.966742	0.957714	0.801	0.71203	0.495402	0.342692	0.232482	0.99202	0.953488	0.961513	0.778628	0.615245	0.425046	0.291656	0.181297
O00471	EXOC5	24	24	1	1.00381	0.98495	0.873665	0.450173	0.145562	0.069898	0.0634788	1	1.01025	0.997585	0.939299	0.469737	0.171913	0.0993841	0.0754805	11.5593	-0.167417	0.0100336	0.998988	11.8268	-0.190325	0.060183	0.999913	Yes	Yes	Yes	Yes	16	16	0.99202	0.828742	0.64094	0.38859	0.246228	0.162807	0.113741	0.0775836	0.99202	0.868153	0.589867	0.424599	0.227704	0.157784	0.113958	0.0781104
O00478	BTN3A3	2	2	1	1.02768	1.0317	1.03334	0.63359	0.440867	0.275472	0.113212	1	0.974054	1.05332	1.10495	0.85015	0.700399	0.403661	0.15185	13.9556	-0.105621	0	0.982729	16.6307	-0.109301	0	0.968912	Yes	Yes	Yes	Yes	2	2	0.99202	0.948282	0.884343	0.854161	0.662692	0.36646	0.37269	0.206805	0.99202	0.854573	0.91523	0.74492	0.681932	0.413639	0.24897	0.182178
O00483	NDUFA4	11	11	1	0.950519	1.02716	0.947738	0.56075	0.385836	0.180712	0.0961278	1	1.10526	1.07856	1.03384	0.675361	0.400555	0.185274	0.0998674	13.0048	-0.115233	0	0.990145	13.7497	-0.124641	0.00446155	0.980119	Yes	Yes	Yes	Yes	11	11	0.99202	0.792501	0.85906	0.939314	0.758067	0.542884	0.419988	0.281836	0.99202	0.954419	0.871796	0.709301	0.611903	0.454763	0.368732	0.257829
O00487	PSMD14	22	22	1	0.98767	0.978675	0.914443	0.687742	0.389477	0.108059	0.0371474	1	1.01767	1.01224	0.94304	0.71138	0.410436	0.137932	0.0401641	13.4787	-0.138176	0	0.990913	13.7467	-0.135995	0	0.993954	Yes	Yes	Yes	Yes	23	23	0.99202	0.932116	0.840944	0.633671	0.426859	0.260636	0.159209	0.0872222	0.99202	0.964303	0.774563	0.658148	0.398346	0.250806	0.153603	0.0889554
O00488	ZNF593	5	5	1	0.988673	1.05686	0.909767	0.59213	0.443406	0.318674	0.197719	1	0.955304	1.02063	0.969656	0.636224	0.430051	0.345946	0.155909	13.6724	-0.0907819	0.0638784	0.989998	14.0413	-0.0936575	0.0261713	0.984836	Yes	Yes	Yes	Yes	3	3	0.99202	0.893179	1.0056	1.05717	0.899283	0.810795	0.810645	0.631805	0.99202	1.33722	1.185	1.24865	1.34376	1.13628	0.943018	0.773601
O00499	BIN1	17	17	1	0.93907	1.00006	0.935442	0.757363	0.750912	0.384712	0.113277	1	0.999124	0.999618	0.931386	0.811234	0.74	0.417424	0.134537	16.4795	-0.107246	0	0.931585	16.7469	-0.108544	0	0.960353	Yes	Yes	Yes	Yes	20	20	0.99202	0.957308	0.916163	0.866385	0.759571	0.684598	0.615987	0.633809	0.99202	0.908487	0.962318	0.810955	0.824545	0.709551	0.609194	0.561993
O00505	KPNA3	9	9	1	1.02215	1.05497	0.944821	0.707114	0.474293	0.255106	0.166202	1	0.943241	0.968711	0.937886	0.718688	0.457492	0.275422	0.148727	14.336	-0.0991419	0	0.994595	14.329	-0.0998802	0	0.993825	Yes	Yes	Yes	Yes	17	17	0.99202	0.943685	0.825345	0.589137	0.383711	0.247349	0.173361	0.115956	0.99202	0.950196	0.798461	0.53712	0.327758	0.2263	0.161096	0.0980537
O00506	STK25	6	6	1	0.791804	0.995519	0.910339	0.423984	0.190901	0.0744371	0.0465644	1	1.01124	0.970165	0.934054	0.519924	0.215141	0.115776	0.0463449	11.601	-0.172705	0.0235221	0.963346	12.1773	-0.156769	0.0141596	0.998819	Yes	Yes	Yes	Yes	8	8	0.99202	0.81218	0.657837	0.454953	0.275838	0.177433	0.12054	0.0788951	0.99202	0.834305	0.583942	0.451469	0.271142	0.188258	0.142244	0.0917545
O00507	USP9Y	1	1	1	1.00424	0.935503	0.962079	0.785194	0.566113	0.244736	0.112384	1	1.0429	1.28753	1.23506	0.957452	0.717954	0.420842	0.184864	15.0618	-0.114048	0	0.986515	17.0361	-0.116829	0	0.866198	Yes	Yes	Yes	Yes	2	2	0.99202	0.836487	0.799981	0.861611	0.85081	0.583948	0.519192	0.480553	0.99202	0.870678	1.01085	0.846907	0.865025	0.889215	0.632844	0.458469
O00512	BCL9	8	8	1	1.06334	1.04791	0.969177	0.7793	0.80027	0.712215	0.547681	1	0.98663	0.963856	0.963405	0.815604	0.694295	0.569404	0.454112		-0.0344059	0	0.917536	19.7616	-0.0490541	0	0.993883	Yes	Yes		Yes	11	11	0.99202	0.959478	0.921421	0.91437	0.912253	0.840803	0.807867	0.783054	0.99202	1.00628	0.998982	0.947135	0.920147	0.858939	0.773809	0.724974
O00515	LAD1	30	30	1	0.957511	0.991042	0.908558	0.663939	0.427443	0.193286	0.108347	1	1.01083	1.00089	0.922939	0.703171	0.418334	0.214981	0.125102	13.6303	-0.110132	0	0.993487	13.8892	-0.110173	0	0.998542	Yes	Yes	Yes	Yes	23	23	0.99202	0.977426	0.906182	0.811138	0.684653	0.587028	0.533095	0.50226	0.99202	0.935466	0.914773	0.785761	0.743659	0.608904	0.554802	0.455326
O00519	FAAH	3	3	1	0.971849	1.00374	0.930807	0.632187	0.40199	0.199742	0.0949565	1	0.946937	0.888162	0.836085	0.524311	0.333446	0.162349	0.0931152	13.4162	-0.112707	0	0.996187	12.2253	-0.111835	0	0.982598	Yes	Yes	Yes	Yes	4	4	0.99202	0.899988	0.814637	0.515036	0.379501	0.31613	0.134627	0.12043	0.99202	0.854958	0.694181	0.510395	0.407816	0.253465	0.125025	0.0916248
O00522	KRIT1	5	5	1	0.997926	0.986074	0.931503	0.577083	0.249552	0.105835	0.086131	1	1.00749	0.98266	0.96672	0.592369	0.296857	0.123583	0.049056	12.5177	-0.149645	0.0222528	0.99948	12.8086	-0.142442	0	0.998269	Yes	Yes	Yes	Yes	5	5	0.99202	0.901283	0.848759	0.736601	0.534917	0.308995	0.209247	0.115312	0.99202	0.94713	0.888581	0.716588	0.510642	0.299859	0.226342	0.145707
O00534	VWA5A	2	2	1	1.13592	1.06283	1.04252	0.822762	0.907338	0.578621	0.0653464	1	0.985115	1.0648	1.00573	0.883014	0.921142	0.467859	0.0797226	18.2621	-0.244628	0	0.929646	17.7862	-0.207386	0	0.977766	Yes	Yes	Yes	Yes	2	2	0.99202	1.13534	1.04181	0.845067	0.855915	0.545838	0.39014	0.245767	0.99202	0.858779	0.889295	0.803222	0.84466	0.545855	0.356153	0.230249
O00541	PES1	22	22	1	1.03602	1.0632	0.979538	0.70936	0.570736	0.249189	0.0504639	1	1.02621	1.03723	0.947911	0.675635	0.528182	0.280091	0.0732432	14.6899	-0.112226	0	0.970621	14.3599	-0.102444	0	0.978334	Yes	Yes	Yes	Yes	16	16	0.99202	0.867329	0.560271	0.308176	0.188482	0.121126	0.0789941	0.0519651	0.99202	0.879665	0.552077	0.323277	0.156314	0.115224	0.0872323	0.06551
O00559	EBAG9	1	1	1	0.967291	0.917674	0.951099	0.780935	0.562697	0.65516	0.629133	1	1.01583	1.026	0.871897	0.769399	0.750045	0.57163	0.321606		-0.950371	0.615663	0.929927	18.4617	-0.0555048	0	0.929099	Yes	Yes		Yes	5	5	0.99202	0.894607	1.08973	0.87385	0.813132	0.76431	0.666606	0.596593	0.99202	0.969962	0.96819	0.844844	0.83854	0.698502	0.501756	0.542712
O00560-2	SDCBP	1	1	1	0.824741	1.08087	1.10708	0.675322	0.612288	0.413337	0.223502	1	0.82239	0.970894	1.00569	0.892678	0.691253	0.403157	0.246451	15.851	-0.0799791	0	0.890854	16.8987	-0.0949677	0	0.942494	Yes	Yes	Yes	Yes	1	1	0.99202	0.690244	1.02452	0.926291	0.536605	0.603202	0.184271	0	0.99202	0.954622	1.02328	0.982973	1.18443	0.76722	0.392808	0
O00560	SDCBP	9	9	1	0.982766	0.97823	0.921227	0.690622	0.735145	0.767293	0.636676	1	0.973401	0.999081	0.899474	0.686415	0.62251	0.612376	0.544247		-0.797532	0.707434	0.931331		-0.0740331	0.554953	0.990348	Yes	Yes			6	6	0.99202	0.94232	0.989169	0.93077	0.804009	0.509476	0.22031	0.154822	0.99202	1.01304	1.03228	0.919763	0.878622	0.568276	0.252638	0.155945
O00562	PITPNM1	6	6	1	1.04934	1.05442	0.997923	0.743714	0.508198	0.32742	0.151436	1	1.0728	1.05651	0.958673	0.806686	0.469379	0.239303	0.151616	14.9291	-0.0972358	0	0.988922	14.6818	-0.117167	0.0264019	0.990818	Yes	Yes	Yes	Yes	6	6	0.99202	1.02863	0.851162	0.592802	0.416385	0.244178	0.161688	0.104003	0.99202	0.907259	0.784349	0.596548	0.40476	0.264594	0.167121	0.0940798
O00566	MPHOSPH10	6	6	1	0.993294	0.982492	0.723924	0.329848	0.145993	0.0873664	0.0400471	1	0.921233	0.944025	0.720991	0.30347	0.115352	0.0862906	0.0287562	10.5028	-0.154321	0	0.999796	10.3547	-0.163691	0	0.992863	Yes	Yes	Yes	Yes	6	6	0.99202	1.03343	1.06155	0.907255	0.623342	0.473985	0.346132	0.273807	0.99202	1.18825	1.10228	0.915181	0.717622	0.56871	0.425468	0.26302
O00567	NOP56	14	14	1	0.963762	0.910158	0.736561	0.327022	0.126768	0.0588879	0.0289847	1	0.997178	0.962684	0.751225	0.309583	0.131762	0.0697054	0.0353707	10.486	-0.162397	0	0.99348	10.5263	-0.165943	0	0.999301	Yes	Yes	Yes	Yes	4	4	0.99202	1.0033	0.85187	0.687702	0.465163	0.281151	0.171434	0.0974662	0.99202	1.09605	0.790675	0.709893	0.490655	0.321224	0.214746	0.124215
O00571	DDX3X	38	38	1	1.01936	0.946376	0.832642	0.38615	0.099403	0.0651307	0.0391572	1	0.983594	0.928351	0.81116	0.372337	0.113568	0.0503832	0.0410364	11.0893	-0.174939	0	0.996631	10.959	-0.171054	0	0.995544	Yes	Yes	Yes	Yes	33	33	0.99202	0.858944	0.49708	0.205734	0.10967	0.0734227	0.0449153	0.028223	0.99202	0.897901	0.440305	0.238639	0.0917294	0.0757755	0.0569915	0.0391788
O00584	RNASET2	7	7	1	1.03283	1.01167	1.04435	0.840675	0.90736	0.981382	0.967222	1	1.00787	1.0328	0.994115	0.832454	0.848938	0.849355	0.843823		-0.0296986	0.925739	0.46599		-0.427025	0.843642	0.97617	Yes	Yes			6	6	0.99202	0.995379	0.93594	0.899452	0.83342	0.819709	0.765856	0.794247	0.99202	0.953944	0.97788	0.922493	1.04567	0.880252	0.745389	0.743904
O00592	PODXL	5	5	1	1.06465	1.06925	1.03959	0.859021	1.019	1.22117	1.21353	1	0.968391	1.01607	0.983333	0.825063	0.855289	0.901478	0.918464		0	1.21735	0.68199		-0.315693	0.875073	0.802459	Yes	Yes			4	4	0.99202	1.00307	0.960204	0.935522	0.935176	0.946381	0.882987	0.885035	0.99202	0.969117	1.01202	0.932395	1.06119	0.922467	0.900785	0.859093
O00623	PEX12	1	1	1	1.0076	1.06968	1.27975	0.45535	0.283778	0.0843305	0.158561	1	1.09035	1.11704	1.29957	0.680052	0.334493	0.238459	0.222609	11.8861	-0.393003	0.172138	0.933732	12.9159	-0.228139	0.241942	0.912873	Yes	Yes	Yes	Yes
O00625	PIR	22	22	1	1.08715	1.12756	1.06415	0.901495	0.940674	1.10011	0.992452	1	0.939878	0.995335	0.931279	0.780645	0.734717	0.775362	0.718659		0.0057363	1.03622	-0.0899129		-0.067461	0.738811	0.945271	Yes	Yes			17	17	0.99202	0.97649	0.948717	0.912223	0.764815	0.520034	0.321332	0.168534	0.99202	0.999012	0.966575	0.81492	0.717671	0.489165	0.275175	0.165691
O00628	PEX7	1	1	1	0.926536	0.999178	0.906096	0.740443	0.830863	0.693064	0.679691	1	0.92716	1.09268	1.0036	0.837217	0.674021	0.61555	0.623007		-0.0363591	0.635034	0.853845		-0.0843603	0.611828	0.942737	Yes	Yes			2	2	0.99202	0.973865	0.852647	0.882715	0.664091	0.517052	0.568842	0.522038	0.99202	0.833151	0.913924	1.12363	1.30156	1.27207	1.21092	1.02416
O00629	KPNA4	17	17	1	1.0193	1.01931	0.989454	0.771102	0.650897	0.305641	0.0611394	1	1.02605	1.08035	1.01017	0.817676	0.629665	0.348193	0.0859214	15.6089	-0.116296	0	0.969755	15.8247	-0.113696	0	0.976532	Yes	Yes	Yes	Yes	15	15	0.99202	0.986311	0.825055	0.713415	0.480837	0.251932	0.148574	0.079544	0.99202	0.940359	0.874019	0.707029	0.536732	0.254323	0.152788	0.0921573
O00635	TRIM38	2	2	1	1.01707	0.920822	0.904291	0.432445	0.181389	0.0303037	0.0155137	1	0.898673	0.905101	0.865201	0.556669	0.207779	0.04135	0	11.6182	-0.176122	0	0.993745	12.1714	-0.163404	0	0.977064	Yes	Yes	Yes	Yes	3	3	0.99202	0.896343	0.7721	0.50561	0.209082	0.127745	0.0835898	0.0347125	0.99202	0.937571	0.776218	0.545111	0.281343	0.169077	0.0972256	0.061275
O00716	E2F3	4	4	1	0.928738	0.898852	0.893919	0.597594	0.368706	0.210204	0.240611	1	1.01071	1.0365	0.997665	0.631293	0.406531	0.263611	0.1321	12.9464	-0.111168	0.130273	0.976361	13.6488	-0.110926	0.0490121	0.991331	Yes	Yes	Yes	Yes	2	2	0.99202	0.909388	0.836588	0.776962	0.564255	0.490704	0.425718	0.265626	0.99202	1.08776	0.84863	0.741083	0.630942	0.534279	0.393399	0.333231
O00743-3	PPP6C	22	22	1	0.953382	0.949053	0.919497	0.620831	0.641063	0.814994	0.949876	1	0.91636	0.908051	0.962116	0.65184	0.613415	0.73514	0.818779		-0.721485	0.756691	0.500883		-0.959117	0.704794	0.725362	Yes	Yes			21	21	0.99202	0.863003	0.759146	0.681257	0.645657	0.653515	0.659563	0.583142	0.99202	0.92857	0.758058	0.688138	0.726684	0.739099	0.699114	0.593455
O00748	CES2	2	2	1	1.07279	1.22197	1.09691	0.811262	0.891241	0.852758	0.503333	1	0.907713	1.21391	1.00708	0.862565	0.686882	0.657991	0.448025		-0.0943272	0	0.688367	20.327	-0.0502518	0	0.844063	Yes	Yes		Yes	1	1	0.99202	1.27793	1.14432	1.17551	1.23116	0.675779	0.375108	0.349072	0.99202	1.35435	1.06394	1.04351	0.850025	0.543981	0.419753	0.328914
O00750	PIK3C2B	3	3	1	1.05747	1.14388	0.968969	0.517941	0.203037	0.0855295	0.0728797	1	1.05419	1.08622	1.00813	0.471397	0.182075	0.0964671	0.0822893	12.1502	-0.186388	0.0524565	0.983535	11.9155	-0.236461	0.0906488	0.991469	Yes	Yes	Yes	Yes	6	6	0.99202	0.879266	0.79144	0.469723	0.213376	0.120262	0.0825833	0.0651589	0.99202	0.912723	0.750486	0.495287	0.178241	0.112373	0.097431	0.064262
O00754	MAN2B1	13	13	1	1.09732	1.19683	1.07125	0.831084	0.874324	0.96797	0.905082	1	1.03352	1.08868	1.05422	0.806683	0.712508	0.697585	0.690452		-0.0450905	0.895532	0.389124		-0.161257	0.699667	0.943209	Yes	Yes			18	18	0.99202	0.956742	0.923759	0.848248	0.879441	0.780771	0.778706	0.724683	0.99202	0.94794	0.951649	0.863066	0.847145	0.793428	0.706501	0.630934
O00762	UBE2C	15	15	1	0.988088	0.986574	0.974814	0.748963	0.768835	0.708529	0.464758	1	1.05381	1.02291	1.02986	0.876629	0.711952	0.683809	0.406643		-0.0394989	0	0.903461	19.9898	-0.0555188	0	0.947876	Yes	Yes		Yes	12	12	0.99202	0.86505	1.01637	0.987652	0.913111	0.80642	0.805157	0.629662	0.99202	0.990296	0.986449	0.894733	0.817189	0.726329	0.625536	0.537774
O00764	PDXK	16	16	1	1.10333	1.19486	1.14922	0.930459	0.970018	1.25518	1.07395	1	0.995762	1.05774	1.04027	0.857701	0.826432	0.822131	0.816304		0.0826858	1.16382	-0.0568009		-0.160818	0.821616	0.935704	Yes	Yes			15	15	0.99202	0.958922	0.919955	0.890191	0.81832	0.561877	0.238988	0.112864	0.99202	0.991464	0.953434	0.871555	0.876836	0.605184	0.229947	0.123852
O00767	SCD	12	12	1	1.01601	1.01892	0.895085	0.504815	0.210836	0.0664965	0.0400805	1	0.983435	1.0301	0.916118	0.5386	0.22504	0.100369	0.0504641	11.9924	-0.156724	0	0.998787	12.2575	-0.150622	0	0.998994	Yes	Yes	Yes	Yes	16	16	0.99202	0.851291	0.741438	0.494439	0.315939	0.211621	0.146036	0.090003	0.99202	0.907923	0.659841	0.499904	0.279662	0.185032	0.138571	0.0921332
O14494-2	PPAP2A	1	1	1	0.939588	1.02067	0.949549	0.835665	0.860809	1.00563	0.726305	1	1.09565	1.40215	1.27326	0.879607	0.988808	0.964668	0.754355		-0.350497	0.857102	0.402735			0	0.149058	Yes	Yes			1	1	0.99202	1.06738	0.995961	0.971973	0.685786	0.726337	0.600784	0.454519	0.99202	1.06781	1.20752	0.958932	0.922404	0.714004	0.633012	0.547026
O14497	ARID1A	37	37	1	1.02371	1.01072	0.936784	0.666243	0.446467	0.230259	0.0955217	1	1.00056	1.01673	0.937748	0.673492	0.420454	0.205664	0.0926602	13.8404	-0.108228	0	0.994168	13.7247	-0.113977	0	0.996827	Yes	Yes	Yes	Yes	36	36	0.99202	0.870997	0.71241	0.536129	0.393761	0.28095	0.203546	0.137802	0.99202	0.869498	0.663005	0.550369	0.380174	0.266421	0.196482	0.140566
O14519	CDK2AP1	1	1	1	0.918207	1.10861	1.01503	0.771932	0.652501	0.850474	0.87443	1	0.929921	0.914451	0.823497	0.75405	0.63346	0.447813	0.546887		-0.184685	0.78697	0.669988	20.8588	-0.0439651	0	0.923255	Yes	Yes		Yes	3	3	0.99202	1.00723	1.03799	0.995018	1.0599	0.817394	0.799207	0.752254	0.99202	1.03556	1.03634	0.863238	0.883615	0.806719	0.69463	0.660812
O14521	SDHD	1	1	1	0.875234	0.967925	0.931705	0.78502	0.726442	0.560437	0.115703	1	1.16687	1.14003	1.21122	1.01251	0.78633	0.594374	0.229417	17.1568	-0.0932574	0	0.871403	18.3043	-0.111857	0	0.872969	Yes	Yes	Yes	Yes	1	1	0.99202	0.91917	0.652184	0.707881	0.686861	0.604765	0.445221	0.26787	0.99202	0.88012	1.04188	0.725756	0.813305	0.506902	0.415098	0.316578
O14523-2	C2CD2L	5	5	1	1.0853	0.952106	0.958376	0.59929	0.281766	0.140862	0.0568811	1	0.914374	1.02574	0.989856	0.677888	0.353976	0.201024	0.0606232	12.8075	-0.140352	0	0.991789	13.5405	-0.128813	0	0.989761	Yes	Yes	Yes	Yes	4	4	0.99202	0.998235	0.904184	0.791562	0.661492	0.539009	0.454342	0.438887	0.99202	0.914256	0.864777	0.710422	0.874482	0.598213	0.532306	0.515584
O14524	TMEM194A	1	1	1	0.890318	0.985029	0.830876	0.584441	0.302035	0.103194	0.0328375	1	0.939992	0.98262	0.761719	0.590659	0.311822	0.108518	0.0209739	12.4095	-0.129911	0	0.978638	12.1534	-0.120987	0	0.973592	Yes	Yes	Yes	Yes	1	1	0.99202	0.813165	0.73091	0.611265	0.386131	0.295821	0.23909	0.137375	0.99202	0.832941	0.739951	0.689977	0.423055	0.306308	0.249139	0.180309
O14526	FCHO1	2	2	1	0.998497	0.992773	1.02005	0.710013	0.66331	0.533994	0.352163	1	0.992135	1.03036	0.958531	0.803748	0.759218	0.650591	0.486219	17.7458	-0.0580297	0	0.95989		-0.0422917	0	0.972392	Yes	Yes	Yes		3	3	0.99202	0.977769	0.90009	0.882924	0.671706	0.527393	0.338191	0.190587	0.99202	1.00192	1.08958	0.853212	0.712064	0.459447	0.392018	0.167616
O14530	TXNDC9	9	9	1	1.00823	1.02486	0.951675	0.738692	0.664882	0.557466	0.383581	1	0.984668	0.999594	0.909689	0.755142	0.607987	0.458542	0.33429	18.4134	-0.052829	0	0.979602	16.7689	-0.0620188	0	0.996586	Yes	Yes	Yes	Yes	7	7	0.99202	0.887357	0.929814	0.83614	0.623802	0.420229	0.251423	0.164362	0.99202	0.933516	0.902719	0.810347	0.70983	0.417653	0.252832	0.154526
O14531	DPYSL4	2	2	1	1.10567	1.35122	1.21944	0.896179	0.692113	0.703219	0.294528	1	0.966396	0.968118	1.0896	0.793206	0.612194	0.452465	0.237912	18.8665	-0.0739407	0	0.724093	16.4904	-0.0816515	0	0.967546	Yes	Yes		Yes	4	4	0.99202	0.858415	0.832519	0.784611	0.572219	0.437992	0.320469	0.27459	0.99202	0.988433	0.953846	0.794579	0.633589	0.493944	0.351328	0.232778
O14544	SOCS6	9	9	1	1.04819	1.14684	1.07402	0.723381	0.395636	0.23964	0.187841	1	1.05117	1.09576	1.02631	0.666482	0.40817	0.228009	0.167516	13.7817	-0.144533	0.165099	0.970573	13.6681	-0.125781	0.112661	0.983533	Yes	Yes	Yes	Yes	10	10	0.99202	0.898206	0.829924	0.605057	0.374144	0.236261	0.189562	0.139623	0.99202	1.00105	0.822315	0.618284	0.373421	0.257808	0.191751	0.149743
O14545	TRAFD1	6	6	1	0.911486	0.971386	0.980047	0.694354	0.634249	0.525396	0.474376	1	0.985181	1.02969	0.983898	0.783118	0.575791	0.461359	0.38738	20.4875	-0.0753029	0.458792	0.955319	16.546	-0.0806013	0.312825	0.996784	Yes	Yes			5	5	0.99202	0.876215	0.907594	0.886982	0.830424	0.732081	0.700235	0.711771	0.99202	0.931281	0.911709	0.85975	0.945626	0.788543	0.707949	0.738858
O14548	COX7A2L	8	8	1	0.944972	1.00373	0.964786	0.665037	0.46414	0.281394	0.164795	1	1.05011	0.99496	1.03661	0.703276	0.472311	0.276858	0.161439	14.1893	-0.0957398	0	0.992541	14.4328	-0.104871	0.0328549	0.988645	Yes	Yes	Yes	Yes	4	4	0.99202	0.898039	0.94188	0.940731	0.810093	0.647582	0.500473	0.327528	0.99202	0.98402	0.974972	0.847362	0.704859	0.5715	0.462693	0.321572
O14561	NDUFAB1	6	6	1	0.868869	1.12454	1.05305	0.76431	1.13628	1.15011	1.02252	1	1.04185	1.04462	0.936608	0.703945	0.746097	0.688462	0.617452		0.0408848	1.10242	0.206874		-0.0925368	0.674823	0.94653	Yes	Yes			8	8	0.99202	0.966234	1.0977	1.33322	1.32568	1.0991	1.18621	0.980484	0.99202	0.928585	1.01124	0.944383	1.02746	0.869284	0.762392	0.773283
O14562	UBFD1	21	21	1	0.904483	0.910391	0.911905	0.738948	0.813963	0.823381	0.557724	1	1.00267	1.00185	0.960123	0.843062	0.800832	0.738568	0.537779		-0.0263628	0	0.635		-0.0365722	0	0.953727	Yes	Yes			25	25	0.99202	0.961843	0.910083	0.850868	0.7889	0.635888	0.47266	0.294968	0.99202	0.966475	0.99539	0.853755	0.874652	0.71249	0.487641	0.297965
O14578-3	CIT	1	1	1	1.01355	1.08506	0.937354	0.702229	0.319246	0.200343	0.120071	1	0.991457	0.922751	0.896811	0.602225	0.279991	0.155615	0.140245	13.4092	-0.137082	0.0656859	0.991742	12.6709	-0.129339	0.0469058	0.992329	Yes	Yes	Yes	Yes
O14578-4	CIT	32	32	1	1.0174	1.06083	0.943996	0.596844	0.221279	0.0995033	0.0718728	1	0.995832	1.01283	0.957699	0.593091	0.212513	0.108302	0.0710376	12.5604	-0.166863	0.0299624	0.996706	12.5275	-0.176124	0.0449817	0.999774	Yes	Yes	Yes	Yes	25	25	0.99202	0.990308	0.932096	0.733534	0.467133	0.28088	0.183943	0.120263	0.99202	0.967031	0.943047	0.757172	0.445695	0.281479	0.206073	0.108386
O14579	COPE	14	14	1	0.874467	0.935541	0.909342	0.644066	0.413876	0.135675	0.0510653	1	1.00421	0.99689	0.911457	0.747268	0.500238	0.148063	0.0571466	13.3468	-0.123989	0	0.968751	14.2894	-0.129261	0	0.983773	Yes	Yes	Yes	Yes
O14593	RFXANK	4	4	1	0.901109	0.912206	0.968073	0.611166	0.39093	0.270618	0.0833508	1	1.09035	1.12382	1.05514	0.751231	0.458874	0.199936	0.0909285	13.4703	-0.10795	0	0.96989	14.3571	-0.126421	0	0.974325	Yes	Yes	Yes	Yes	2	2	0.99202	0.904031	0.874512	0.859325	0.628374	0.528345	0.720868	0.477694	0.99202	1.00546	0.91023	0.844888	0.746301	0.637063	0.494193	0.460339
O14602	EIF1AY	2	2	1	1.07679	1.17867	1.1675	0.891875	0.875334	0.806993	0.338583	1	1.11253	1.04196	1.0939	0.866303	0.779485	0.62646	0.328203	19.91	-0.151411	0	0.825749	18.8961	-0.0754032	0	0.928031	Yes	Yes	Yes	Yes
O14617-5	AP3D1	57	57	1	1.03191	0.998886	0.769065	0.363267	0.11925	0.054021	0.0390394	1	1.01992	0.99452	0.795379	0.349478	0.120491	0.0569044	0.0397496	10.771	-0.165029	0	0.998342	10.8328	-0.170553	0	0.999529	Yes	Yes	Yes	Yes	53	53	0.99202	0.929701	0.76646	0.415065	0.197046	0.12215	0.0782972	0.0414548	0.99202	0.921343	0.747557	0.418088	0.170845	0.115538	0.0849834	0.0515496
O14618	CCS	9	9	1	1.03986	1.04856	1.05562	0.813735	0.951942	1.08574	0.944405	1	1.04923	1.10626	1.07497	0.86988	0.841303	0.910075	0.826156		-0.0173983	0.953684	0.145909		-0.297223	0.859178	0.731121	Yes	Yes			7	7	0.99202	1.00053	0.943114	0.860415	0.778684	0.687879	0.564213	0.473378	0.99202	0.993246	1.05515	0.93151	0.874386	0.715154	0.601467	0.441584
O14628	ZNF195	1	1	1	0.988534	0.976363	0.750478	0.346463	0.13039	0.0505989	0.0136083	1	1.04997	0.955061	0.785658	0.371143	0.123994	0.0508297	0.021144	10.6345	-0.165354	0	0.998526	10.8627	-0.166969	0	0.996036	Yes	Yes	Yes	Yes	1	1	0.99202	0.966909	0.740211	0.638869	0.418028	0.333229	0.199054	0.13995	0.99202	0.971775	0.874638	0.664881	0.514672	0.34006	0.278345	0.157612
O14639	ABLIM1	12	12	1	0.905385	0.958096	0.910254	0.714873	0.619334	0.647636	0.535713	1	0.967989	1.00156	0.911085	0.794951	0.606356	0.501261	0.396973		-0.0610348	0.532241	0.930585	17.7873	-0.055598	0	0.995382	Yes	Yes		Yes	16	16	0.99202	0.984561	0.983789	0.899128	0.903071	0.827085	0.739511	0.730681	0.99202	0.973984	1.01126	0.880174	0.876702	0.783962	0.676217	0.584848
O14640	DVL1	3	3	1	0.949218	0.975739	0.871684	0.547745	0.317742	0.209227	0.139476	1	0.940978	0.921092	0.844558	0.536299	0.246018	0.134795	0.0695874	12.5256	-0.111435	0.0306193	0.996749	12.0794	-0.128497	0	0.989789	Yes	Yes	Yes	Yes	3	3	0.99202	0.961144	0.778142	0.589809	0.430289	0.313817	0.226222	0.145161	0.99202	0.861312	0.789934	0.553088	0.395838	0.318774	0.236663	0.187782
O14641	DVL2	14	14	1	0.949439	0.97756	0.889723	0.530723	0.266189	0.124719	0.0598373	1	0.988955	1.00948	0.928927	0.586224	0.27936	0.127955	0.0690198	12.2541	-0.134534	0	0.996886	12.6746	-0.137437	0	0.999713	Yes	Yes	Yes	Yes	14	14	0.99202	0.829564	0.714957	0.531679	0.327013	0.232812	0.143551	0.0972177	0.99202	0.863816	0.659863	0.493046	0.311689	0.22783	0.150783	0.102825
O14646	CHD1	2	2	1	0.891556	0.935703	0.769045	0.313587	0.120957	0.0789949	0.013709	1	0.981179	1.01953	0.87374	0.420363	0.150279	0.0828367	0.0566482	10.5959	-0.170397	0	0.987267	11.4254	-0.171846	0.0224491	0.999299	Yes	Yes	Yes	Yes
O14647	CHD2	2	2	1	0.977505	0.917241	0.916123	0.673627	0.602408	0.238397	0.0642146	1	0.959018	1.0937	0.955783	0.69566	0.670662	0.37681	0.0939426	14.5314	-0.103161	0	0.946705	15.5595	-0.0914911	0	0.932635	Yes	Yes	Yes	Yes
O14653-2	GOSR2	3	3	1	1.1269	1.27595	1.10951	0.811919	0.818379	0.846109	0.587882	1	0.927888	1.06071	0.967753	0.750635	0.634282	0.63946	0.44751		-0.0337048	0	0.599863	20.9763	-0.0532808	0.33865	0.934643	Yes	Yes			3	3	0.99202	0.946094	0.886319	0.760201	0.72081	0.626176	0.4905	0.356239	0.99202	0.949717	0.900737	0.689985	0.618141	0.526476	0.403827	0.289294
O14656	TOR1A	7	7	1	0.977682	1.02158	0.963207	0.582745	0.260169	0.0754384	0.0228581	1	1.03556	1.0245	0.991137	0.624237	0.279786	0.105087	0.0358662	12.6139	-0.160745	0	0.997765	12.9194	-0.155576	0	0.997357	Yes	Yes	Yes	Yes	13	13	0.99202	0.919639	0.831972	0.62597	0.452865	0.331044	0.229542	0.153294	0.99202	0.919936	0.827674	0.653578	0.470807	0.334313	0.227026	0.142825
O14657	TOR1B	4	4	1	0.950908	0.945143	0.966884	0.599394	0.303128	0.0943156	0.056057	1	1.0676	1.06572	1.01914	0.754827	0.371237	0.144078	0.0632273	12.8316	-0.145882	0	0.993266	13.8727	-0.146984	0	0.991877	Yes	Yes	Yes	Yes	9	9	0.99202	1.00047	0.850767	0.648801	0.447711	0.32239	0.242372	0.155376	0.99202	0.935026	0.82741	0.662564	0.478507	0.302678	0.227125	0.140318
O14662-2	STX16	5	5	1	1.0877	1.09667	1.08406	0.79005	0.580809	0.372491	0.215187	1	1.03799	1.04015	0.990642	0.784173	0.460127	0.288428	0.145888	15.8676	-0.0908355	0	0.964393	14.7184	-0.10841	0.0117169	0.995452	Yes	Yes	Yes	Yes	7	7	0.99202	1.02985	0.954691	0.745618	0.593161	0.505339	0.384637	0.340164	0.99202	0.955346	0.918022	0.711013	0.561707	0.436864	0.379004	0.28092
O14668	PRRG1	2	2	1	0.872999	1.18106	0.937336	0.640755	0.603189	0.626798	0.526084	1	0.90537	1.08398	1.06519	0.681534	0.520859	0.51394	0.406379		-0.123876	0.579116	0.857034	14.462	-0.172764	0.471222	0.946803	Yes	Yes			2	2	0.99202	1.00297	0.909439	0.887169	0.776803	0.725314	0.738896	0.694092	0.99202	0.947638	0.992728	0.892648	0.914811	0.755041	0.724452	0.656163
O14672	ADAM10	18	18	1	1.0039	0.966901	0.903629	0.706913	0.734546	0.78541	0.718564	1	1.01894	1.0035	0.932325	0.743823	0.677414	0.656197	0.616436		-0.87622	0.736358	0.960113		-0.0651323	0.618928	0.995456	Yes	Yes			25	25	0.99202	0.960977	0.922237	0.822292	0.771803	0.608978	0.455856	0.345544	0.99202	0.964445	0.93871	0.819932	0.827088	0.625183	0.455484	0.322698
O14681	EI24	2	2	1	1.05071	1.15624	0.991527	0.658534	0.343826	0.15962	0.0343432	1	1.11764	1.19853	1.08415	0.689099	0.32907	0.12849	0.0361886	13.3384	-0.138637	0	0.977351	13.4496	-0.154995	0	0.957785	Yes	Yes	Yes	Yes	2	2	0.99202	0.881617	0.739972	0.50177	0.273383	0.176334	0.0930246	0.0572057	0.99202	0.955411	0.685222	0.503326	0.272512	0.158638	0.112235	0.0613021
O14683	TP53I11	5	5	1	0.946815	0.980227	0.94298	0.63496	0.386471	0.213098	0.0765505	1	1.01511	1.02163	0.909908	0.627652	0.391839	0.177738	0.0717502	13.4064	-0.11546	0	0.993328	13.2554	-0.117109	0	0.994804	Yes	Yes	Yes	Yes	4	4	0.99202	0.913873	0.83685	0.689107	0.468248	0.482715	0.358174	0.245802	0.99202	0.924458	0.836295	0.65027	0.551229	0.408538	0.321889	0.271604
O14686-3	KMT2D	14	14	1	0.969665	0.992174	0.91814	0.685764	0.549208	0.341844	0.173696	1	1.03029	1.04158	0.985692	0.722969	0.54412	0.344192	0.181445	14.8158	-0.0841553	0	0.986366	15.1238	-0.0891583	0	0.989715	Yes	Yes	Yes	Yes	21	21	0.99202	0.959694	0.926798	0.814125	0.680061	0.477356	0.42401	0.317685	0.99202	0.883082	0.858054	0.791123	0.672432	0.488968	0.3737	0.272733
O14713	ITGB1BP1	2	2	1	0.887804	0.940916	1.00617	0.635725	0.3333	0.25644	0.168911	1	1.04553	0.967034	1.06051	0.676878	0.401193	0.204473	0.130224	13.0704	-0.150493	0.173568	0.978035	13.716	-0.130217	0.0710123	0.987123	Yes	Yes	Yes	Yes	2	2	0.99202	0.99133	0.9187	0.780846	0.584008	0.505261	0.399448	0.348041	0.99202	0.943639	0.912369	0.765265	0.623994	0.502938	0.375595	0.261909
O14717	TRDMT1	5	5	1	1.00996	1.11229	1.01346	0.625245	0.393143	0.218101	0.150965	1	1.01158	1.01101	1.01625	0.551577	0.296135	0.169882	0.110986	13.3851	-0.126154	0.100353	0.982154	12.5261	-0.165738	0.114449	0.994406	Yes	Yes	Yes	Yes	3	3	0.99202	0.90531	0.766586	0.485829	0.38703	0.188489	0.165247	0.0553208	0.99202	0.835622	0.653377	0.493204	0.311689	0.158863	0.118868	0.0546577
O14727	APAF1	9	9	1	0.931657	1.04573	0.911926	0.512594	0.241272	0.127597	0.0596627	1	1.0502	1.00881	0.928345	0.574525	0.252443	0.115267	0.068	12.1663	-0.143468	0.00941263	0.993988	12.5354	-0.143619	0.00039701	0.997927	Yes	Yes	Yes	Yes	13	13	0.99202	0.969042	0.861497	0.593128	0.403295	0.221596	0.153927	0.103269	0.99202	0.927168	0.747455	0.583697	0.357563	0.231787	0.154266	0.10645
O14730	RIOK3	8	8	1	0.768891	0.736461	0.691213	0.513708	0.308368	0.181628	0.104845	1	1.09086	0.939111	0.841337	0.546355	0.324415	0.193023	0.110312	10.5722	-0.0961883	0	0.850162	12.4093	-0.108732	0	0.988659	Yes	Yes	Yes	Yes	7	7	0.99202	0.975919	0.786579	0.593137	0.39799	0.314317	0.235157	0.139129	0.99202	0.945273	0.826387	0.615171	0.422147	0.31231	0.196908	0.140433
O14732	IMPA2	6	6	1	0.947204	1.07362	1.04267	0.738737	0.768432	0.869274	0.851599	1	1.05267	1.15811	1.0847	0.833822	0.767625	0.792415	0.746643		-0.10429	0.806726	0.778233		-0.33936	0.768894	0.804447	Yes	Yes			6	6	0.99202	0.980311	0.913631	0.87325	0.805563	0.657002	0.582252	0.431454	0.99202	0.982194	0.929532	0.777149	0.904988	0.737348	0.65993	0.446303
O14733-2	MAP2K7	7	7	1	0.976392	0.971532	0.928736	0.472569	0.207803	0.0936742	0.0918308	1	0.98414	0.998698	0.917973	0.506638	0.217852	0.116145	0.0647419	11.8621	-0.173276	0.0599796	0.998393	12.0714	-0.15447	0.0257454	0.999711	Yes	Yes	Yes	Yes
O14734	ACOT8	6	6	1	0.9714	0.992045	0.893865	0.583888	0.280824	0.143953	0.0619669	1	0.991574	0.933008	0.910742	0.5819	0.284352	0.134763	0.0602032	12.5935	-0.131236	0	0.99829	12.623	-0.133994	0	0.99554	Yes	Yes	Yes	Yes	5	5	0.99202	0.793578	0.755621	0.593023	0.396026	0.286442	0.218303	0.136333	0.99202	0.928058	0.743929	0.625182	0.398771	0.289011	0.192755	0.165073
O14735	CDIPT	5	5	1	1.05361	0.983396	0.932807	0.551729	0.21808	0.0632838	0.0296436	1	1.09053	1.05422	0.977534	0.565537	0.227507	0.09334	0.0539084	12.3229	-0.165425	0	0.99714	12.4634	-0.170616	0.0261017	0.991718	Yes	Yes	Yes	Yes	7	7	0.99202	0.860265	0.773157	0.54608	0.385855	0.26003	0.171612	0.109697	0.99202	0.949226	0.753459	0.58476	0.372555	0.264053	0.168656	0.111023
O14737	PDCD5	17	17	1	0.982631	1.04833	0.938669	0.818443	0.968679	1.01654	1.20737	1	0.983949	1.03786	0.964914	0.886058	0.833039	1.05638	0.900705		-0.0613846	0.989941	0.00549438		-0.285256	0.919046	0.310718	Yes	Yes			17	17	0.99202	0.988655	0.95329	0.943175	0.942103	0.924033	0.869368	0.93195	0.99202	0.962863	1.01685	0.999234	1.05119	0.938805	0.840924	0.852652
O14744	PRMT5	56	56	1	0.946874	1.02864	0.944016	0.786501	0.865558	0.895308	0.889546	1	0.982374	1.00294	0.950467	0.801775	0.747069	0.830491	0.774521		-0.383545	0.859228	0.732378		-0.0836825	0.784995	0.950895	Yes	Yes			42	42	0.99202	0.972949	0.968007	0.929868	0.761503	0.311682	0.14907	0.0803224	0.99202	0.998176	0.98117	0.941435	0.842026	0.341578	0.177924	0.0978551
O14745	SLC9A3R1	30	30	1	0.986557	1.0176	0.96604	0.814632	0.856965	1.0241	1.04155	1	0.987945	1.02331	0.955891	0.856885	0.807051	0.931788	0.928569		-0.164762	0.934313	0.160462		-0.333329	0.881073	0.693397	Yes	Yes			30	30	0.99202	0.974295	0.938791	0.91397	0.912092	0.858446	0.798514	0.842313	0.99202	0.940984	0.995816	0.928785	1.01712	0.924197	0.854141	0.833261
O14756	HSD17B6	1	1	1	1.09229	1.07856	1.0823	0.804905	0.636468	0.750176	0.800619	1	1.01234	1.07431	1.00825	0.821868	0.711388	0.527972	0.533354		-0.614709	0.729087	0.8401		-0.0632897	0.443454	0.969307	Yes	Yes
O14757	CHEK1	22	22	1	1.0839	1.10503	1.06692	0.821058	0.493287	0.109387	0.0303665	1	1.03362	1.08445	1.07244	0.832304	0.497128	0.133071	0.0436565	14.6064	-0.163281	0	0.977147	14.6979	-0.158522	0	0.98496	Yes	Yes	Yes	Yes	24	24	0.99202	0.97965	0.919473	0.845419	0.754766	0.497534	0.22635	0.0836168	0.99202	0.950468	0.943842	0.836917	0.806105	0.511865	0.242039	0.0896676
O14763	TNFRSF10B	8	8	1	1.07926	1.09504	1.01995	0.808501	0.915881	0.978815	0.853529	1	0.976334	0.934223	0.942586	0.807469	0.76066	0.758027	0.7209		-0.0725621	0.889391	0.555555		-0.0242186	0.357512	0.944825	Yes	Yes			6	6	0.99202	0.990606	0.913011	0.892795	0.82529	0.792656	0.765032	0.754936	0.99202	0.96709	1.00624	0.888197	0.956123	0.847044	0.766145	0.697345
O14770	MEIS2	1	1	1	1.2793	1.07703	1.11326	0.949714	0.803187	0.744196	0.50793	1	1.18782	1.25466	1.15517	0.825794	0.745339	0.812565	0.530472		-0.0557572	0	0.748049		-0.0399551	0	0.638934	Yes	Yes
O14772	FPGT	12	12	1	1.02765	1.02708	0.978419	0.651511	0.393043	0.22972	0.179382	1	1.00717	1.01847	0.926166	0.61514	0.332974	0.198147	0.123693	13.5017	-0.121392	0.113574	0.996886	13.0534	-0.119116	0.0292844	0.999512	Yes	Yes	Yes	Yes	16	16	0.99202	0.974041	0.896624	0.694404	0.483127	0.302071	0.205496	0.129257	0.99202	0.954102	0.878457	0.677949	0.440173	0.276996	0.186744	0.12542
O14773	TPP1	6	6	1	1.02397	1.00219	0.965389	0.685336	0.467961	0.283432	0.137923	1	0.978674	1.02493	0.936141	0.636681	0.408581	0.229604	0.13905	14.2661	-0.0992922	0	0.995399	13.5849	-0.104528	0	0.997522	Yes	Yes	Yes	Yes	15	15	0.99202	0.972624	0.918121	0.813095	0.693058	0.54786	0.468765	0.388918	0.99202	0.97686	0.907602	0.771006	0.668686	0.554093	0.406064	0.332285
O14776	TCERG1	52	52	1	1.08371	1.07981	1.03108	0.825515	0.695957	0.266171	0.0570332	1	0.998228	1.01368	0.950777	0.746739	0.58219	0.245926	0.0642923	16.0166	-0.147897	0	0.967376	14.9165	-0.114595	0	0.978407	Yes	Yes	Yes	Yes	44	44	0.99202	0.962033	0.906967	0.806812	0.442897	0.223975	0.150378	0.0911383	0.99202	0.970003	0.937931	0.781398	0.437367	0.249102	0.163327	0.0998179
O14777	NDC80	26	26	1	0.992432	1.00088	0.929948	0.589935	0.265031	0.0814671	0.029818	1	0.979768	1.00005	0.921384	0.595709	0.273176	0.103094	0.0379109	12.6143	-0.153782	0	0.99846	12.6627	-0.14648	0	0.998482	Yes	Yes	Yes	Yes	20	20	0.99202	0.907	0.809201	0.629416	0.482193	0.371553	0.294189	0.227358	0.99202	0.901464	0.803133	0.64571	0.518118	0.368101	0.2991	0.215099
O14787	TNPO2	17	17	1	0.96151	1.19229	1.21558	0.919699	0.626169	0.367838	0.131541	1	1.07336	1.21215	1.22169	0.915418	0.618877	0.314556	0.129175	16.2394	-0.120221	0	0.916866	16.0068	-0.127632	0	0.915185	Yes	Yes	Yes	Yes	25	25	0.99202	0.981789	0.953784	0.860334	0.766727	0.624849	0.46801	0.361434	0.99202	0.942915	0.889199	0.833388	0.737835	0.555264	0.448483	0.29314
O14792	HS3ST1	2	2	1	1.11599	1.19391	0.97883	0.676966	0.373602	0.250988	0.086301	1	1.0163	0.976325	0.917242	0.585298	0.295634	0.244881	0.0920524	13.7163	-0.11613	0	0.956099	12.8093	-0.118393	0.0262637	0.994374	Yes	Yes	Yes	Yes	2	2	0.99202	1.00698	0.895489	0.509127	0.456986	0.298889	0.241807	0.169464	0.99202	0.974294	0.848952	0.530586	0.408397	0.359646	0.253976	0.1676
O14795	UNC13B	15	15	1	1.0201	1.01295	0.956292	0.574478	0.277888	0.140567	0.11052	1	0.975261	1.02594	0.91197	0.534815	0.281762	0.131546	0.0858863	12.5893	-0.150484	0.0679326	0.999104	12.3854	-0.132856	0.00825435	0.998294	Yes	Yes	Yes	Yes	13	13	0.99202	0.929412	0.792264	0.606355	0.393713	0.266534	0.178538	0.112461	0.99202	0.904768	0.714142	0.597636	0.389235	0.261327	0.191243	0.11641
O14802	POLR3A	34	34	1	1.01532	1.07659	0.926737	0.51644	0.241984	0.121943	0.0660764	1	1.00068	1.0294	0.91445	0.479557	0.217318	0.113301	0.0609145	12.1984	-0.149807	0.0250999	0.994884	11.9256	-0.157048	0.0298282	0.998942	Yes	Yes	Yes	Yes	24	24	0.99202	0.830668	0.622401	0.421445	0.279195	0.179124	0.112539	0.073779	0.99202	0.868017	0.581591	0.433412	0.251392	0.164348	0.11435	0.077866
O14810	CPLX1	1	1	1	1.30047	1.0986	1.06438	0.800558	0.787528	0.698706	0.8526	1	1.086	1.26991	0.894945	0.943167	0.666421	0.746128	0.579413		-0.265713	0.779611	0.588145		-0.040799	0.453836	0.707551	Yes	Yes			2	2	0.99202	1.07693	1.15723	1.02991	0.891912	0.945589	0.783514	0.809028	0.99202	1.00323	1.08761	0.937571	0.733934	0.711405	0.728595	0.686378
O14817	TSPAN4	2	2	1	0.921647	0.981391	0.921993	0.9037	1.1229	1.59073	1.49302	1	0.983483	1.17313	1.19291	0.908385	0.964639	1.02101	1.16047		1.32703	1.5	0.942025		0.270517	1.07009	0.109438	Yes	Yes			3	3	0.99202	1.05105	1.06603	0.898178	1.00079	0.947953	0.893409	0.845689	0.99202	1.05918	1.14248	0.938372	0.936033	0.87331	0.690553	0.741324
O14818	PSMA7	36	36	1	0.999949	1.0007	0.974861	0.783512	0.854785	0.936971	0.927721	1	0.982834	1.01393	0.974099	0.84169	0.792288	0.837029	0.800757		-0.314057	0.875747	0.648378		-0.0594176	0.809357	0.972876	Yes	Yes			47	47	0.99202	0.979405	0.931466	0.869576	0.843975	0.739472	0.692347	0.674151	0.99202	0.96399	0.977593	0.936101	0.912462	0.796573	0.694108	0.612283
O14828	SCAMP3	12	12	1	1.01504	0.994237	0.942792	0.633199	0.415861	0.266789	0.129098	1	1.02293	1.03089	0.979456	0.674854	0.436042	0.286195	0.135432	13.6813	-0.101233	0	0.996404	14.1051	-0.101359	0	0.994007	Yes	Yes	Yes	Yes	14	14	0.99202	0.935175	0.826479	0.658747	0.501195	0.379365	0.263252	0.208339	0.99202	0.912533	0.783295	0.655738	0.503323	0.391222	0.284746	0.183722
O14832	PHYH	4	4	1	0.960068	0.958111	0.998636	0.654021	0.537938	0.482683	0.403824	1	1.01047	1.00817	1.03196	0.724279	0.601838	0.438677	0.349001	15.0495	-0.116337	0.438904	0.9804	16.2667	-0.0775952	0.239069	0.981746	Yes	Yes		Yes	3	3	0.99202	0.777505	0.870366	0.594338	0.320996	0.227156	0.145194	0.0798042	0.99202	0.905665	0.765181	0.560314	0.325429	0.194234	0.142335	0.0889449
O14841	OPLAH	13	13	1	0.979762	1.06597	1.04538	0.803647	0.756847	0.449678	0.136505	1	1.00852	1.03292	1.01193	0.794647	0.710261	0.427189	0.141843	16.9909	-0.109856	0	0.951837	16.5822	-0.0996192	0	0.965902	Yes	Yes	Yes	Yes	11	11	0.99202	0.990959	0.914817	0.7467	0.466625	0.277097	0.170715	0.117813	0.99202	0.941145	0.92657	0.746517	0.423591	0.254439	0.177261	0.114339
O14867	BACH1	4	4	1	0.980425	1.00227	0.99187	0.756898	0.697288	0.63577	0.533818	1	1.08675	1.21359	1.08862	0.831018	0.740194	0.68881	0.526192		-0.0542536	0.497656	0.972506		-0.0480886	0.390975	0.815416	Yes	Yes			6	6	0.99202	1.0812	1.01335	0.970601	0.822389	0.736946	0.657638	0.604566	0.99202	1.03221	1.06389	0.925239	0.879577	0.734159	0.760851	0.520511
O14874	BCKDK	8	8	1	1.04175	1.06713	0.888189	0.448112	0.18733	0.0914066	0.0604707	1	1.02706	1.01164	0.843945	0.425047	0.204153	0.123975	0.0603749	11.6533	-0.162726	0.0236798	0.995391	11.4539	-0.146856	0.0194793	0.998893	Yes	Yes	Yes	Yes	7	7	0.99202	0.938622	0.846883	0.711513	0.705772	0.603697	0.325824	0.0553674	0.99202	1.00908	0.906024	0.800566	0.781461	0.623414	0.344381	0.0857287
O14879	IFIT3	1	1	1	1.14968	1.31743	1.20974	0.788418	0.619062	0.234383	0.153154	1	1.04557	1.111	1.15276	0.715776	0.388388	0.257654	0.199182	15.4814	-0.118228	0	0.865123	13.6335	-0.157971	0.20236	0.961473	Yes	Yes	Yes	Yes
O14880	MGST3	7	7	1	0.998929	1.11101	0.997255	0.700796	0.521004	0.282406	0.068459	1	1.0531	1.00123	0.979411	0.658455	0.481443	0.275125	0.0971806	14.5302	-0.107793	0	0.971956	14.1335	-0.103109	0	0.9856	Yes	Yes	Yes	Yes	5	5	0.99202	0.996612	0.879512	0.690539	0.469308	0.321005	0.220877	0.136686	0.99202	0.88089	0.807842	0.65206	0.483297	0.31999	0.209303	0.125052
O14893	GEMIN2	3	3	1	0.991454	1.00172	0.977351	0.740143	0.881367	1.01386	0.793001	1	0.881637	1.01364	0.92616	0.659672	0.787012	0.851108	0.646839		-0.360309	0.857093	0.462595		-0.687402	0.736158	0.68106	Yes	Yes			7	7	0.99202	0.979595	0.947447	0.862985	0.780743	0.847762	0.723297	0.604859	0.99202	0.927544	0.958198	0.799054	0.892749	0.860297	0.697067	0.584135
O14896	IRF6	11	11	1	0.96969	1.00262	1.00636	0.80485	0.619564	0.18138	0.0481167	1	1.05215	1.0364	1.04886	0.886366	0.628413	0.218824	0.0615988	15.3107	-0.145917	0	0.979619	15.6629	-0.157074	0	0.989785	Yes	Yes	Yes	Yes	7	7	0.99202	1.03096	0.975613	0.757468	0.441455	0.234463	0.165529	0.0863588	0.99202	0.948499	0.926639	0.753748	0.459145	0.234584	0.137875	0.0882915
O14907	TAX1BP3	7	7	1	1.0083	1.12987	1.00726	0.769322	0.78919	0.850836	0.643891	1	1.03118	1.13498	1.06686	0.836917	0.744631	0.69744	0.465664		-0.254022	0.761303	0.784299		-0.0482749	0	0.894027	Yes	Yes			4	4	0.99202	0.878521	0.975304	0.893101	0.757583	0.582948	0.441609	0.332845	0.99202	1.02959	0.970329	0.773975	0.593479	0.407	0.360383	0.25941
O14908	GIPC1	14	14	1	0.945088	1.00246	0.9876	0.741567	0.512927	0.215742	0.0600688	1	0.973381	0.990943	0.964524	0.804685	0.564941	0.254269	0.0755062	14.5116	-0.121238	0	0.986321	15.1335	-0.12179	0	0.989889	Yes	Yes	Yes	Yes	18	18	0.99202	0.981402	0.875178	0.747597	0.497357	0.269606	0.170269	0.107773	0.99202	0.966413	0.949416	0.727581	0.54015	0.311394	0.171344	0.105298
O14920	IKBKB	16	16	1	0.959542	0.958096	0.885748	0.556784	0.264422	0.1289	0.0668069	1	1.02227	1.02345	0.955915	0.621336	0.293464	0.130926	0.0685551	12.3727	-0.133043	0	0.996544	12.939	-0.140026	0	0.998998	Yes	Yes	Yes	Yes	11	11	0.99202	0.780617	0.634486	0.400317	0.277994	0.184232	0.129348	0.0893149	0.99202	0.849229	0.576595	0.433297	0.259472	0.194344	0.152303	0.100542
O14925	TIMM23	7	7	1	1.08492	1.03629	0.988984	0.661371	0.442396	0.375147	0.191983	1	1.02557	1.06435	0.958751	0.610372	0.380123	0.240176	0.137777	14.232	-0.0969495	0.122587	0.97781	13.3119	-0.113685	0.0571744	0.992497	Yes	Yes	Yes	Yes	8	8	0.99202	0.897298	0.714379	0.554263	0.394937	0.241078	0.150276	0.0813571	0.99202	1.01287	0.717948	0.512776	0.291758	0.199753	0.137657	0.0885051
O14929	HAT1	21	21	1	0.998088	0.987613	0.89384	0.664402	0.443311	0.3158	0.146021	1	1.02005	0.958139	0.865394	0.595761	0.331661	0.192879	0.115046	13.9897	-0.091107	0	0.994644	12.7934	-0.11022	0	0.997233	Yes	Yes	Yes	Yes	29	29	0.99202	0.985807	0.873637	0.691942	0.593398	0.510605	0.38628	0.167201	0.99202	0.982047	0.898792	0.658624	0.548805	0.444368	0.329255	0.162243
O14933	UBE2L6	3	3	1	0.998841	1.11249	1.08762	0.727299	0.588924	0.427372	0.261673	1	0.936549	1.18437	1.12615	0.790831	0.603646	0.387689	0.230829	16.0098	-0.0805748	0.0762937	0.951359	16.0919	-0.0900093	0.0233059	0.925578	Yes	Yes	Yes	Yes	6	6	0.99202	0.968466	0.98002	0.88276	0.80117	0.551753	0.426947	0.345187	0.99202	1.03443	1.02144	0.843031	0.683744	0.506215	0.370677	0.267434
O14936	CASK	24	24	1	0.950177	1.01508	1.01299	0.802917	0.826804	0.813314	0.437185	1	1.00293	0.993267	0.98717	0.820241	0.753151	0.6841	0.376938		-0.0499952	0	0.803011	19.8889	-0.0546809	0	0.935638	Yes	Yes		Yes	22	22	0.99202	0.990763	0.917513	0.891468	0.789983	0.558375	0.280007	0.118863	0.99202	0.943031	0.942426	0.840697	0.838151	0.571565	0.273379	0.124045
O14939	PLD2	6	6	1	1.10602	1.06108	0.937222	0.538591	0.22567	0.0923879	0.0637676	1	1.00756	1.09835	0.95566	0.552748	0.232465	0.107109	0.060244	12.2835	-0.158574	0.0166281	0.989323	12.3951	-0.161297	0.0263393	0.992616	Yes	Yes	Yes	Yes	5	5	0.99202	0.890466	0.726493	0.445552	0.268925	0.163068	0.106527	0.0621929	0.99202	0.850085	0.659391	0.470004	0.260316	0.160645	0.128023	0.0651853
O14944	EREG	4	4	1	0.933655	0.977765	0.863932	0.747807	0.902781	1.04455	1.01621	1	1.03172	0.995724	0.950499	0.836127	0.825474	0.865123	0.921211		-0.233695	0.915056	0.0552948		-0.347638	0.861984	0.851234	Yes	Yes			3	3	0.99202	0.910783	0.959965	0.898064	0.933	0.86663	0.775077	0.618368	0.99202	0.932066	0.999056	0.97676	0.991468	0.93864	0.801929	0.602325
O14949	UQCRQ	7	7	1	0.964123	0.956871	0.864372	0.494354	0.211931	0.0415585	0.00890023	1	1.0092	0.959741	0.912075	0.559108	0.23519	0.0809067	0.021459	11.8349	-0.158427	0	0.993539	12.3565	-0.156026	0	0.997309	Yes	Yes	Yes	Yes	9	9	0.99202	0.894474	0.705728	0.482235	0.322248	0.206975	0.134543	0.0802669	0.99202	0.928696	0.709047	0.526989	0.299417	0.214662	0.140672	0.087231
O14950	MYL12B	44	44	1	1.32902	1.29124	1.26258	1.04871	1.14392	1.13271	0.581018	1	1.00342	1.05566	1.03962	0.878385	0.840749	0.757274	0.39849		0	0	0.24398	20.2511	-0.0793484	0	0.919837	Yes	Yes		Yes	49	49	0.99202	0.974405	0.926707	0.806812	0.801204	0.722255	0.639293	0.627301	0.99202	1.02955	0.968453	0.775121	0.764276	0.636867	0.551469	0.478401
O14964	HGS	34	34	1	0.945212	1.01132	0.975048	0.809792	0.876188	0.840341	0.301789	1	0.995166	1.05368	1.00949	0.861535	0.845924	0.76446	0.322582	19.8644	-0.19198	0	0.857272	19.6616	-0.119287	0	0.907348	Yes	Yes	Yes	Yes	39	39	0.99202	0.970607	0.905518	0.836154	0.789157	0.685033	0.551348	0.498208	0.99202	0.953347	0.965507	0.876228	0.915469	0.747496	0.604555	0.498155
O14965	AURKA	9	9	1	1.05103	1.04016	0.991649	0.603564	0.303399	0.176036	0.111045	1	1.01482	1.01005	0.942461	0.582948	0.270825	0.126798	0.0887189	12.8536	-0.149623	0.0871496	0.994752	12.629	-0.144884	0.0291803	0.999602	Yes	Yes	Yes	Yes	7	7	0.99202	1.01806	0.846168	0.621846	0.392238	0.260656	0.196229	0.121812	0.99202	0.92395	0.765836	0.544335	0.327748	0.226965	0.133577	0.0936413
O14966	RAB7L1	6	6	1	1.03103	1.03087	0.88867	0.56965	0.263326	0.127854	0.0637282	1	1.01936	1.01024	0.896298	0.519384	0.246933	0.113005	0.0690625	12.4507	-0.134972	0	0.997646	12.1698	-0.139139	0	0.99948	Yes	Yes	Yes	Yes	6	6	0.99202	0.880668	0.717939	0.518551	0.33384	0.22949	0.164267	0.106935	0.99202	0.840123	0.65736	0.527935	0.384311	0.258393	0.190298	0.115299
O14967	CLGN	15	15	1	0.92341	1.03499	1.05859	0.749397	0.543889	0.369276	0.248255	1	0.996086	0.979726	0.994626	0.766878	0.548533	0.357515	0.197924	15.3713	-0.092796	0.127832	0.975477	15.4358	-0.0893604	0	0.995739	Yes	Yes	Yes	Yes	18	18	0.99202	0.821738	0.960266	0.825329	0.648723	0.532142	0.416277	0.372254	0.99202	0.927964	0.807776	0.753059	0.658842	0.542088	0.38021	0.327949
O14972	DSCR3	9	9	1	0.991744	1.01953	1.04059	0.744964	0.539129	0.34978	0.16732	1	0.963015	1.0294	1.0406	0.736652	0.528232	0.330985	0.200718	15.2413	-0.0941722	0	0.987115	15.1307	-0.09342	0.0228411	0.986878	Yes	Yes	Yes	Yes	7	7	0.99202	0.974945	0.90103	0.686036	0.47584	0.310447	0.248322	0.16098	0.99202	0.949459	0.840611	0.63946	0.459857	0.299116	0.209255	0.139239
O14974	PPP1R12A	41	41	1	1.02771	1.02823	1.00223	0.725339	0.359537	0.134355	0.0645504	1	1.004	1.02708	0.958426	0.728052	0.358594	0.158006	0.0726446	13.6826	-0.144972	0	0.997809	13.696	-0.137094	0	0.99903	Yes	Yes	Yes	Yes	39	39	0.99202	0.95055	0.858547	0.755835	0.656849	0.562854	0.524644	0.493418	0.99202	0.962118	0.897673	0.748923	0.718131	0.615257	0.543867	0.483522
O14975	SLC27A2	15	15	1	0.949891	1.02401	0.959143	0.515055	0.217652	0.0786861	0.0548356	1	1.00106	1.02147	0.967633	0.554491	0.23807	0.0935609	0.0390668	12.1768	-0.170448	0.0235265	0.996797	12.4539	-0.158942	8.63709e-05	0.998835	Yes	Yes	Yes	Yes	15	15	0.99202	0.869156	0.745286	0.442144	0.317681	0.21422	0.146283	0.0844799	0.99202	0.849999	0.652252	0.468334	0.303655	0.205075	0.140356	0.0886604
O14976	GAK	34	34	1	1.0488	1.09619	0.98306	0.614488	0.326666	0.159349	0.0998353	1	1.02854	1.07409	1.00568	0.649226	0.34365	0.182584	0.098734	13.0308	-0.137451	0.0428131	0.988945	13.3076	-0.135651	0.0455398	0.992125	Yes	Yes	Yes	Yes	28	28	0.99202	0.860183	0.680234	0.468547	0.271529	0.170478	0.107067	0.0748671	0.99202	0.834136	0.60344	0.466974	0.274818	0.17782	0.129215	0.0844435
O14977	AZIN1	1	1	1	1.06264	1.07112	0.97652	0.729176	0.810185	0.667642	0.749436	1	1.04839	1.13234	1.08674	0.820772	0.853376	0.701134	0.631245		-0.688357	0.73911	0.894443		-0.0368038	0.422495	0.826676	Yes	Yes
O14979	HNRNPDL	38	38	1	1.02375	1.06265	0.991614	0.73672	0.718463	0.760282	0.691804	1	1.04457	1.07596	1.00802	0.785103	0.683179	0.693368	0.593618		-0.150051	0.72344	0.961141		-0.081944	0.638511	0.949677	Yes	Yes			27	27	0.99202	0.959891	0.900773	0.813131	0.732862	0.577787	0.537191	0.547645	0.99202	1.09824	0.963892	0.964912	0.789011	0.682294	0.609818	0.512376
O14980	XPO1	118	118	1	1.05077	1.05281	0.96017	0.59983	0.287983	0.135276	0.0822659	1	1.03959	1.05893	0.96782	0.595445	0.278988	0.135213	0.0812386	12.8008	-0.143202	0.0249033	0.995362	12.7475	-0.148748	0.0361524	0.995539	Yes	Yes	Yes	Yes	102	102	0.99202	0.905409	0.743827	0.514298	0.342911	0.216241	0.14667	0.0889988	0.99202	0.899151	0.671645	0.512434	0.314785	0.200134	0.141935	0.0878439
O14981	BTAF1	37	37	1	0.996243	1.04099	0.907705	0.505419	0.198299	0.0866238	0.0707887	1	1.00709	1.01327	0.928156	0.515662	0.210417	0.109271	0.0786528	11.9996	-0.159807	0.018799	0.998418	12.1019	-0.163634	0.0433587	0.999808	Yes	Yes	Yes	Yes	28	28	0.99202	0.842702	0.685955	0.463242	0.292083	0.199137	0.147194	0.0948063	0.99202	0.843716	0.624804	0.448615	0.265006	0.197429	0.132413	0.0929112
O15013	ARHGEF10	25	25	1	1.00215	1.06047	1.00638	0.639301	0.325464	0.119919	0.0676549	1	1.0534	1.06489	1.02564	0.673692	0.350216	0.137022	0.0735113	13.171	-0.143097	0	0.994377	13.4527	-0.140125	0	0.990992	Yes	Yes	Yes	Yes	25	25	0.99202	0.880371	0.831393	0.68361	0.468462	0.319138	0.225849	0.137336	0.99202	0.909484	0.792549	0.659014	0.466982	0.302751	0.214354	0.148606
O15014	ZNF609	12	12	1	1.00018	1.03224	0.92654	0.546761	0.339127	0.247598	0.200136	1	0.98935	1.04729	0.92677	0.560522	0.324555	0.228175	0.178904	12.5332	-0.133621	0.177714	0.998095	12.5972	-0.132908	0.145486	0.997227	Yes	Yes	Yes	Yes	11	11	0.99202	0.931405	0.889297	0.788267	0.643462	0.530659	0.432653	0.394288	0.99202	0.933147	0.892675	0.789826	0.639891	0.525619	0.419275	0.344319
O15020	SPTBN2	14	14	1	1.0045	1.02116	0.857349	0.544446	0.445812	0.425049	0.243836	1	1.00378	1.02429	0.896125	0.616583	0.444173	0.426777	0.280187	13.3935	-0.0893946	0.213012	0.980433	14.0053	-0.0891875	0.237164	0.989514	Yes	Yes	Yes	Yes	10	10	0.99202	0.938814	0.895406	0.876647	0.849688	0.766326	0.383289	0.189864	0.99202	0.961375	0.931458	0.848896	0.995903	0.792096	0.35861	0.208913
O15031	PLXNB2	54	54	1	1.00127	1.01669	0.986527	0.703601	0.461457	0.232793	0.0730655	1	1.02474	1.02815	0.995787	0.74794	0.465913	0.24328	0.0877705	14.1501	-0.11567	0	0.992992	14.4217	-0.11713	0	0.995153	Yes	Yes	Yes	Yes	54	54	0.99202	0.948175	0.875827	0.724335	0.598332	0.452517	0.359697	0.263888	0.99202	0.956069	0.886741	0.742778	0.624453	0.454453	0.344791	0.253077
O15033	AREL1	2	2	1	1.16225	1.1059	1.04908	0.65254	0.345757	0.227292	0.100847	1	1.10526	0.994878	1.07622	0.547796	0.239986	0.162975	0.116225	13.3522	-0.140472	0.0875774	0.963169	12.2805	-0.235292	0.146071	0.983798	Yes	Yes	Yes	Yes	4	4	0.99202	0.95145	0.912029	0.732353	0.524042	0.384305	0.259584	0.223396	0.99202	0.89323	0.791865	0.639934	0.464136	0.347651	0.23204	0.164458
O15037	KHNYN	4	4	1	1.57292	1.72891	1.43221	0.849792	0.503766	0.275416	0.171393	1	1.08221	1.11024	0.975837	0.619805	0.37593	0.234284	0.102067	14.988	-0.142725	0.137906	0.579561	13.4118	-0.114326	0.0105191	0.979516	Yes	Yes		Yes	5	5	0.99202	0.947645	0.782091	0.605004	0.415814	0.288155	0.179839	0.157833	0.99202	0.929561	0.719256	0.584161	0.363065	0.26509	0.174865	0.126693
O15040	TECPR2	8	8	1	1.07763	1.05665	1.01689	0.709147	0.456413	0.381293	0.259491	1	0.9705	0.986616	0.934584	0.643817	0.419883	0.279815	0.169133	14.3523	-0.11095	0.247809	0.981201	13.8219	-0.0955724	0.00332504	0.997452	Yes	Yes	Yes	Yes	9	9	0.99202	0.973385	0.987133	0.882066	0.765323	0.544531	0.396078	0.278458	0.99202	0.967932	0.953089	0.861915	0.702377	0.496474	0.368022	0.288618
O15042	U2SURP	28	28	1	1.02174	1.00658	0.939184	0.592166	0.225569	0.0652796	0.0420386	1	1.00567	1.00233	0.938656	0.572388	0.211913	0.0820442	0.0459518	12.5482	-0.165938	0	0.999044	12.4322	-0.163195	0	0.999866	Yes	Yes	Yes	Yes	34	34	0.99202	0.948491	0.969949	0.900386	0.697953	0.401729	0.246509	0.150452	0.99202	1.02646	1.00675	0.914279	0.725227	0.419196	0.247808	0.151823
O15047	SETD1A	22	22	1	0.974395	1.00241	0.942226	0.634875	0.384021	0.205628	0.093792	1	0.985148	0.966356	0.93355	0.643295	0.377455	0.214079	0.0992946	13.3984	-0.114642	0	0.997465	13.4168	-0.113128	0	0.99753	Yes	Yes	Yes	Yes	18	18	0.99202	0.931342	0.757884	0.569469	0.372677	0.241661	0.170863	0.0990432	0.99202	0.945616	0.709492	0.584428	0.375887	0.235531	0.170351	0.109378
O15056	SYNJ2	11	11	1	1.02251	1.04069	1.0173	0.693937	0.361472	0.139463	0.0668051	1	1.01328	1.06464	1.00091	0.718894	0.384274	0.155706	0.0840769	13.5729	-0.140532	0	0.995651	13.7894	-0.134477	0	0.995057	Yes	Yes	Yes	Yes	10	10	0.99202	1	0.892506	0.63169	0.326936	0.211459	0.164134	0.0988216	0.99202	0.981895	0.909013	0.61911	0.36422	0.228492	0.160201	0.118151
O15062	ZBTB5	3	3	1	1.04325	1.03663	0.973071	0.585584	0.3932	0.250955	0.162174	1	0.999577	1.07644	1.09247	0.619061	0.380711	0.23519	0.15057	13.18	-0.11801	0.115345	0.991137	13.216	-0.146669	0.156458	0.975963	Yes	Yes	Yes	Yes	1	1	0.99202	0.794518	0.761567	0.8834	0.654944	0.504923	0.395829	0.302399	0.99202	0.919858	0.624965	0.615031	0.579491	0.488794	0.305378	0.237755
O15063	KIAA0355	3	3	1	1.01781	1.03507	0.967779	0.570553	0.34385	0.199216	0.110921	1	1.05463	1.0432	1.09302	0.609587	0.366445	0.176983	0.130533	12.8827	-0.12752	0.060723	0.994772	13.1159	-0.150727	0.114873	0.978368	Yes	Yes	Yes	Yes
O15066	KIF3B	12	12	1	1.00015	0.996412	0.934238	0.663459	0.318717	0.146994	0.0894228	1	0.953766	0.982516	0.915893	0.666499	0.345913	0.154268	0.102763	13.2148	-0.132032	0	0.999593	13.3006	-0.124183	0	0.996263	Yes	Yes	Yes	Yes	9	9	0.99202	1.01286	0.652469	0.413188	0.210828	0.140807	0.0914774	0.0600004	0.99202	0.885673	0.653776	0.420741	0.19148	0.132154	0.0962911	0.0634762
O15067	PFAS	52	52	1	0.991579	1.00546	0.961602	0.735903	0.734111	0.588557	0.129062	1	1.02041	1.05142	0.9941	0.820014	0.737441	0.602648	0.176933	17.1839	-0.081263	0	0.880966	17.7317	-0.0893738	0	0.926589	Yes	Yes	Yes	Yes	41	41	0.99202	0.959906	0.845682	0.546258	0.286033	0.164153	0.111508	0.0674336	0.99202	0.950632	0.843388	0.540929	0.28227	0.173805	0.118311	0.0733767
O15068	MCF2L	3	3	1	1.20899	1.24372	1.02508	0.365416	0.209759	0.158058	0.143796	1	0.953715	1.15116	1.01281	0.502715	0.330258	0.215361	0.180911	11.5636	-0.38753	0.168247	0.937612	12.1705	-0.190781	0.208523	0.970958	Yes	Yes	Yes	Yes	2	2	0.99202	0.685345	0.83678	0.575422	0.444839	0.309174	0.270415	0.0647727	0.99202	0.934747	0.814195	0.722887	0.393553	0.216702	0.259786	0.222762
O15078	CEP290	3	3	1	0.966397	0.917695	0.922641	0.769461	0.665092	0.359281	0.0638358	1	0.967055	0.979213	0.935888	0.838489	0.695066	0.414085	0.111091	15.8017	-0.107809	0	0.942011	16.509	-0.110639	0	0.968596	Yes	Yes	Yes	Yes	4	4	0.99202	0.966516	0.832103	0.686572	0.437139	0.226841	0.137261	0.116376	0.99202	0.934293	0.921408	0.724683	0.48875	0.260157	0.172256	0.129774
O15084	ANKRD28	13	13	1	0.934178	0.98553	0.880776	0.504662	0.248025	0.122306	0.0899734	1	0.996151	1.03654	0.939688	0.571027	0.287098	0.148198	0.103429	12.048	-0.135648	0.0125423	0.995866	12.6093	-0.139699	0.0466895	0.998533	Yes	Yes	Yes	Yes	15	15	0.99202	0.897317	0.789094	0.560572	0.396093	0.233635	0.177695	0.10984	0.99202	0.92762	0.705912	0.58368	0.375116	0.245467	0.169495	0.113461
O15085-2	ARHGEF11	14	14	1	0.962105	1.00457	0.952755	0.599499	0.282987	0.130663	0.0804868	1	0.981926	1.02419	1.00829	0.686887	0.338662	0.129338	0.0695426	12.7776	-0.142375	0.0176641	0.99856	13.4426	-0.143814	0	0.997596	Yes	Yes	Yes	Yes	12	12	0.99202	0.956754	0.871664	0.703546	0.505909	0.376412	0.296252	0.215658	0.99202	0.947692	0.816262	0.673436	0.518454	0.361995	0.282162	0.185464
O15091	KIAA0391	20	20	1	1.07278	1.01731	0.901468	0.540019	0.19982	0.0870482	0.0453007	1	1.02324	0.971248	0.83272	0.435705	0.172224	0.0671645	0.0381299	12.1733	-0.156496	0	0.995342	11.39	-0.155245	0	0.998367	Yes	Yes	Yes	Yes	15	15	0.99202	0.854389	0.62888	0.366082	0.196632	0.109389	0.0669225	0.0287374	0.99202	0.860909	0.57272	0.402837	0.18317	0.106984	0.071816	0.0382348
O15111	CHUK	23	23	1	1.02643	1.0271	0.933622	0.54097	0.224583	0.0694508	0.0346858	1	1.01352	1.0164	0.931984	0.579063	0.235521	0.0661572	0.0371305	12.2877	-0.161582	0	0.998429	12.4924	-0.161594	0	0.998792	Yes	Yes	Yes	Yes	20	20	0.99202	0.7626	0.539685	0.29105	0.153399	0.0893559	0.0506564	0.0296229	0.99202	0.803873	0.447722	0.322804	0.128243	0.0846809	0.0573673	0.0325756
O15116	LSM1	6	6	1	1.01211	1.02471	1.03201	0.780144	0.829794	0.95614	0.886906	1	1.11263	1.11947	1.08877	0.93366	0.876898	0.874649	0.796991		-0.0755137	0.863475	0.689078		-0.0260122	0.803677	0.644315	Yes	Yes			5	5	0.99202	0.976222	0.992007	0.962496	0.976125	0.890218	0.828156	0.764351	0.99202	0.979045	0.998182	0.899399	0.977597	0.876153	0.79071	0.763141
O15118	NPC1	12	12	1	0.985861	0.955413	0.982795	0.782013	0.713074	0.5588	0.337111	1	0.986074	1.0266	0.974004	0.762532	0.665899	0.489839	0.275388	18.2375	-0.0603091	0	0.966397	17.0008	-0.0688973	0	0.9786	Yes	Yes	Yes	Yes	18	18	0.99202	0.972904	0.958063	0.915169	0.877187	0.74563	0.676327	0.571919	0.99202	0.951458	0.968317	0.871523	0.870442	0.719727	0.620778	0.487694
O15120	AGPAT2	2	2	1	1.06568	1.059	1.07346	0.650798	0.332307	0.216058	0.149697	1	1.06374	1.15863	1.02879	0.632982	0.387485	0.229512	0.135849	13.1176	-0.164567	0.155489	0.984295	13.434	-0.127745	0.0957065	0.96815	Yes	Yes	Yes	Yes
O15121	DEGS1	4	4	1	1.00927	1.07333	0.989407	0.655279	0.521458	0.33531	0.167795	1	0.994525	1.05559	0.954428	0.681992	0.449763	0.280777	0.19367	14.6406	-0.0888975	0	0.979235	14.1634	-0.0980029	0.0485562	0.995351	Yes	Yes	Yes	Yes	3	3	0.99202	1.07847	0.998471	0.814258	0.550978	0.492697	0.361646	0.294623	0.99202	0.925485	0.871057	0.764184	0.601007	0.466588	0.329989	0.22123
O15126	SCAMP1	14	14	1	1.05885	1.05746	1.05542	0.873244	0.935686	1.05449	0.958375	1	1.05629	1.03774	1.02613	0.857482	0.813845	0.847546	0.745342		-0.0171388	0.954845	0.190294		-0.10108	0.801814	0.894094	Yes	Yes			12	12	0.99202	0.889393	0.95287	0.954442	0.880966	0.844344	0.765477	0.791897	0.99202	0.961069	0.942812	0.913183	0.886196	0.811623	0.746701	0.714573
O15127	SCAMP2	3	3	1	0.985021	0.968435	1.11389	0.78045	0.999491	1.03152	0.699594	1	0.99644	0.976638	1.07515	0.717372	0.760172	0.895094	0.61701		0	0	0.517645		-0.148822	0.745965	0.743782	Yes	Yes			5	5	0.99202	0.959732	1.0087	1.02287	0.781457	0.653877	0.569738	0.556346	0.99202	0.850061	0.90445	0.756927	0.744602	0.600931	0.47947	0.398375
O15131	KPNA5	1	1	1	1.11608	1.08679	1.01199	0.758637	0.291705	0.209746	0.0725433	1	1.10278	1.04108	1.00691	0.674703	0.289917	0.16575	0.0433861	13.5223	-0.172459	0.0860418	0.979761	13.2411	-0.150451	0.0130697	0.988312	Yes	Yes	Yes	Yes	1	1	0.99202	0.854881	0.667215	0.467978	0.219271	0.1125	0.0631032	0.0327452	0.99202	0.920825	0.623537	0.402717	0.234741	0.125261	0.0609018	0.0492817
O15143	ARPC1B	23	23	1	1.16893	1.19294	1.11275	0.988332	1.02227	1.06129	0.500682	1	1.06152	1.02033	0.957219	0.71073	0.640864	0.495214	0.336245		0	0	0.750335	17.1386	-0.0597392	0	0.975428	Yes	Yes		Yes	24	24	0.99202	0.921711	0.896076	0.8431	0.803833	0.682118	0.447322	0.0824996	0.99202	0.990863	0.910449	0.804549	0.722382	0.616676	0.389552	0.0939156
O15144	ARPC2	45	45	1	1.00647	1.02046	1.02291	0.84797	0.901407	0.916729	0.626086	1	1.04076	1.05114	1.0123	0.889193	0.830084	0.816003	0.618666			0	0.748787		-0.0327271	0	0.914714	Yes	Yes			43	43	0.99202	0.975403	0.932825	0.895548	0.94959	0.844543	0.67885	0.210754	0.99202	0.969591	0.982887	0.889019	1.01735	0.895973	0.676664	0.211969
O15145	ARPC3	19	19	1	0.981221	1.01271	0.949881	0.726075	0.618514	0.328689	0.0682151	1	0.98279	0.980052	0.950956	0.742357	0.584224	0.31434	0.102993	15.2236	-0.10182	0	0.963171	15.1233	-0.100657	0	0.979957	Yes	Yes	Yes	Yes	17	17	0.99202	0.968585	0.894898	0.800487	0.767517	0.638786	0.415493	0.131602	0.99202	0.980048	0.969518	0.847741	0.844937	0.654565	0.398244	0.152531
O15151	MDM4	2	2	1	1.0048	1.03704	1.06804	0.800188	0.627887	0.39246	0.186532	1	1.09998	0.953372	0.857528	0.72197	0.478426	0.308559	0.165111	16.1337	-0.093236	0	0.980398	14.377	-0.0883337	0	0.976279	Yes	Yes	Yes	Yes	6	6	0.99202	0.944298	0.899922	0.907595	0.808983	0.794627	0.731634	0.688634	0.99202	0.898279	0.959205	0.859197	0.852159	0.795118	0.65679	0.604362
O15155	BET1	5	5	1	1.01282	1.09621	1.13054	0.673637	0.663549	0.583962	0.399782	1	1.1582	1.20977	1.19108	0.854621	0.708207	0.667836	0.422157		-0.178971	0.54339	0.879681	19.8966	-0.057491	0.0324729	0.786179	Yes	Yes			4	4	0.99202	0.962687	0.878881	0.736634	0.629198	0.550168	0.443058	0.374974	0.99202	0.957183	0.91951	0.829349	0.677105	0.476217	0.469389	0.329311
O15160	POLR1C	17	17	1	1.19849	1.21941	1.08738	0.635768	0.281033	0.0791188	0.0467276	1	1.02508	1.06482	0.969194	0.635815	0.264204	0.104565	0.0371245	12.9898	-0.172924	0.0155277	0.941669	12.9085	-0.157738	0	0.996228	Yes	Yes	Yes	Yes	15	15	0.99202	0.95729	0.76759	0.538264	0.289384	0.174185	0.108322	0.0600498	0.99202	0.951162	0.691735	0.49028	0.271562	0.169086	0.10792	0.0652549
O15162	PLSCR1	3	3	1	1.05779	1.22567	1.13352	0.945718	1.056	1.35858	1.03372	1	1.14284	1.09355	1.2218	0.941675	0.907515	0.925089	1.07119		0.469774	1.19615	-0.0169508			1.5	-0.0721949	Yes	Yes			3	3	0.99202	0.84436	0.962283	1.09063	1.07956	1.09895	0.928949	0.830426	0.99202	1.00477	0.938136	0.910823	0.842968	0.759359	0.912253	0.738412
O15164	TRIM24	7	7	1	1.03016	1.04426	1.03107	0.714235	0.424295	0.198556	0.0861734	1	0.997898	0.993318	0.936618	0.658758	0.366292	0.191603	0.0712349	14.0314	-0.12477	0	0.992504	13.4051	-0.121912	0	0.998282	Yes	Yes	Yes	Yes	9	9	0.99202	0.921524	0.81043	0.664875	0.467424	0.307344	0.334853	0.165404	0.99202	0.927507	0.826218	0.820971	0.475472	0.30892	0.234592	0.157104
O15169	AXIN1	2	2	1	0.980808	1.09469	0.901841	0.60253	0.429394	0.228234	0.229396	1	1.03839	1.10474	0.927529	0.640541	0.377288	0.246304	0.190116	13.3496	-0.102132	0.105318	0.98429	13.3717	-0.113343	0.107845	0.987199	Yes	Yes	Yes	Yes	1	1	0.99202	0.909924	0.746998	0.623188	0.39847	0.25899	0.234646	0.0938703	0.99202	0.887498	0.702957	0.491542	0.366535	0.245638	0.141406	0.0883689
O15173-2	PGRMC2	19	19	1	1.082	1.12242	1.07139	0.898215	0.919475	1.07308	0.960729	1	0.984538	0.996018	0.98339	0.820843	0.762847	0.782973	0.718026		-0.0141233	0.964987	0.0539576		-0.062577	0.746916	0.978212	Yes	Yes			19	19	0.99202	0.95973	0.950145	0.83472	0.848472	0.764714	0.684661	0.587412	0.99202	0.946952	1.00912	0.860114	0.882513	0.755371	0.630237	0.542134
O15182	CETN3	10	10	1	1.0309	1.00024	0.971934	0.709724	0.702258	0.785226	0.787946	1	0.997557	1.01424	0.956041	0.698262	0.608254	0.655319	0.684309		-0.653199	0.746288	0.945699		-0.122519	0.649804	0.984226	Yes	Yes			11	11	0.99202	1.00705	0.841647	0.826461	0.798873	0.750005	0.716989	0.741235	0.99202	0.882076	0.860977	0.729716	0.771384	0.758299	0.672215	0.626432
O15194	CTDSPL	3	3	1	1.03573	1.11869	1.06048	0.679977	0.41367	0.22687	0.1476	1	0.96937	1.10285	1.029	0.654334	0.442933	0.222631	0.105462	13.8	-0.127194	0.0935069	0.976652	13.9131	-0.113273	0	0.979044	Yes	Yes	Yes	Yes	1	1	0.99202	0.92746	0.885039	0.738133	0.509417	0.356594	0.22452	0.131052	0.99202	0.9324	0.822941	0.626158	0.436374	0.27273	0.195137	0.0973988
O15211	RGL2	3	3	1	0.981656	1.0182	0.934739	0.576363	0.304453	0.116248	0.0463077	1	1.00309	1.02512	0.968805	0.596831	0.330347	0.156724	0.0784561	12.6849	-0.138637	0	0.997572	12.9909	-0.12924	0	0.99737	Yes	Yes	Yes	Yes	2	2	0.99202	0.793436	0.661535	0.497683	0.393583	0.210817	0.195474	0.162925	0.99202	0.872282	0.694571	0.514408	0.32838	0.215438	0.206747	0.140808
O15212	PFDN6	19	19	1	1.00897	0.995571	0.95134	0.898241	0.896395	1.00739	0.929073	1	1.02281	1.02664	0.899718	0.728872	0.669017	0.657608	0.617326		-0.136776	0.932775	0.49999		-0.0656855	0.620463	0.991327	Yes	Yes			26	26	0.99202	0.960471	0.919512	0.901179	0.832661	0.805655	0.752484	0.737762	0.99202	0.915261	0.953688	0.892649	0.95705	0.895939	0.772339	0.741775
O15213	WDR46	2	2	1	1.07401	0.994694	1.01265	0.56608	0.375709	0.17436	0.11077	1	0.990615	1.07598	0.927201	0.539989	0.319763	0.215146	0.171691	13.0041	-0.129872	0.0577994	0.984598	12.4484	-0.137378	0.143501	0.99356	Yes	Yes	Yes	Yes
O15226-2	NKRF	15	15	1	0.937636	0.933983	0.753876	0.376249	0.17109	0.096322	0.0473221	1	0.995602	0.977702	0.823965	0.382528	0.187394	0.107799	0.0554451	10.8133	-0.144278	0	0.993827	11.1521	-0.154374	0.0219675	0.999344	Yes	Yes	Yes	Yes	4	4	0.99202	0.887198	0.654506	0.426862	0.311715	0.200861	0.128877	0.101097	0.99202	0.938001	0.681137	0.466417	0.313623	0.209595	0.174823	0.1181
O15228	GNPAT	21	21	1	0.958077	1.01738	0.944967	0.561576	0.222936	0.0861962	0.0459586	1	1.0497	1.0693	1.00273	0.606084	0.253473	0.101955	0.0430434	12.415	-0.159926	0	0.998358	12.7595	-0.164545	0.0123266	0.993392	Yes	Yes	Yes	Yes	18	18	0.99202	0.845168	0.690382	0.435006	0.272536	0.173571	0.111894	0.0565018	0.99202	0.844867	0.608716	0.449504	0.242058	0.157249	0.112723	0.0656742
O15230	LAMA5	5	5	1	0.989898	1.09508	1.02729	0.631315	0.407769	0.242921	0.113677	1	0.974395	1.07778	1.06407	0.654875	0.429041	0.220859	0.0981434	13.6491	-0.115937	0.0365982	0.981144	13.8872	-0.117218	0	0.979025	Yes	Yes	Yes	Yes
O15231-3	ZNF185	14	14	1	0.977637	1.01311	1.00926	0.773021	0.790886	0.772587	0.620654	1	0.981908	1.05226	0.967976	0.79176	0.707482	0.698958	0.536957		-0.037534	0.610162	0.883617		-0.0406979	0.349201	0.951354	Yes	Yes			22	22	0.99202	0.959902	0.896991	0.79433	0.709999	0.675011	0.674421	0.637887	0.99202	0.952767	0.950979	0.850073	0.887648	0.783515	0.693064	0.63433
O15234	CASC3	4	4	1	1.0157	1.05739	1.05358	0.811194	0.905747	0.984231	0.841854	1	1.03626	1.1107	1.0488	0.82233	0.758217	0.799851	0.691478		-0.0653581	0.885931	0.599715		-0.163424	0.749724	0.874115	Yes	Yes			9	9	0.99202	1.01173	1.05714	0.961327	0.976775	1.00405	1.08534	1.01786	0.99202	1.06232	1.13468	1.01556	1.00825	0.964794	0.966034	0.907908
O15235	MRPS12	11	11	1	1.10779	1.17088	1.14894	0.850205	0.763397	0.625232	0.430042	1	1.09001	1.13123	1.09162	0.844108	0.692518	0.540559	0.347257	19.819	-0.0591081	0	0.856124	18.1359	-0.0683911	0	0.931578	Yes	Yes	Yes	Yes	4	4	0.99202	0.700086	0.563713	0.390936	0.242651	0.157097	0.101581	0.0800169	0.99202	0.787785	0.507764	0.428381	0.250373	0.158742	0.109957	0.0816152
O15254	ACOX3	8	8	1	0.967026	1.10982	1.10263	0.834328	0.944657	1.10025	1.10426	1	1.02556	1.03914	1.03971	0.863335	0.837532	0.891867	0.868523		0	1.10426	0.245173		-0.154344	0.865211	0.903053	Yes	Yes			6	6	0.99202	1.00338	0.889659	0.901962	0.825461	0.480978	0.252961	0.162732	0.99202	0.95545	0.973413	0.874756	0.897512	0.553722	0.24652	0.186134
O15258	RER1	6	6	1	1.02845	1.04719	1.0127	0.667828	0.418701	0.298	0.218678	1	0.956453	0.921471	0.923359	0.61388	0.33667	0.220946	0.154644	13.7317	-0.122601	0.19448	0.992105	13.0406	-0.117699	0.0709144	0.991132	Yes	Yes	Yes	Yes	6	6	0.99202	0.951653	0.83508	0.647221	0.429615	0.328246	0.215319	0.117349	0.99202	0.876068	0.784077	0.596053	0.408788	0.279241	0.223543	0.124404
O15259-4	NPHP1	2	2	1	1.03387	1.08917	1.07698	0.647136	0.451872	0.358742	0.155133	1	0.897553	0.959402	0.961444	0.589703	0.434733	0.208317	0.126076	14.1618	-0.106807	0.122798	0.960725	13.4372	-0.106049	0	0.976721	Yes	Yes	Yes	Yes
O15260	SURF4	8	8	1	0.966514	0.921538	0.881392	0.580546	0.318097	0.17217	0.0736295	1	1.03988	1.01113	0.940464	0.616707	0.326152	0.161684	0.0943904	12.6673	-0.119518	0	0.991587	13.0379	-0.125384	0	0.998285	Yes	Yes	Yes	Yes	8	8	0.99202	0.898682	0.725716	0.547018	0.390936	0.307845	0.222052	0.149877	0.99202	0.916765	0.745822	0.56046	0.398497	0.283707	0.224858	0.132991
O15264	MAPK13	11	11	1	1.0093	0.992074	0.965044	0.745492	0.517426	0.132148	0.0504361	1	1.00815	1.05719	1.00089	0.78775	0.513461	0.171949	0.0526205	14.376	-0.134458	0	0.98394	14.6418	-0.13702	0	0.989682	Yes	Yes	Yes	Yes	7	7	0.99202	0.999363	0.924776	0.839808	0.659461	0.351807	0.124842	0.0655991	0.99202	0.914208	0.9331	0.814257	0.723928	0.344706	0.139981	0.0646342
O15265-2	ATXN7	3	3	1	1.01381	0.920635	0.681714	0.261106	0.106239	0.0709123	0.0566422	1	0.933548	1.02105	0.792999	0.254259	0.12435	0.0907962	0.0750056	10.0217	-0.17106	0.0116666	0.996355	10.3754	-0.22173	0.073463	0.99625	Yes	Yes	Yes	Yes	4	4	0.99202	0.953977	0.80587	0.58321	0.520674	0.485482	0.338885	0.331463	0.99202	0.949809	0.768758	0.637811	0.579077	0.535549	0.406255	0.301121
O15269	SPTLC1	15	15	1	0.973322	1.00448	0.877252	0.547092	0.279382	0.110912	0.0560916	1	1.02179	0.998237	0.894489	0.562131	0.284331	0.148282	0.080422	12.3208	-0.133964	0	0.997613	12.504	-0.127406	0	0.999421	Yes	Yes	Yes	Yes	16	16	0.99202	0.857648	0.700148	0.466219	0.3074	0.175769	0.109137	0.0514644	0.99202	0.905996	0.656085	0.491758	0.288798	0.167978	0.113665	0.061672
O15270	SPTLC2	23	23	1	1.00906	0.991796	0.907251	0.545906	0.237284	0.109317	0.0623825	1	0.970767	1.01897	0.916845	0.541331	0.239865	0.111054	0.0690627	12.303	-0.143864	0	0.999802	12.3073	-0.145123	0.00592372	0.998954	Yes	Yes	Yes	Yes	19	19	0.99202	0.885995	0.757497	0.518956	0.341792	0.193166	0.124412	0.071692	0.99202	0.883527	0.66829	0.523572	0.30869	0.196735	0.122832	0.0641383
O15287	FANCG	17	17	1	1.03907	1.07186	0.987637	0.57715	0.284946	0.194571	0.148584	1	0.997935	1.08426	0.976852	0.611587	0.29729	0.179109	0.130934	12.5715	-0.167913	0.145617	0.993242	12.8371	-0.152255	0.104955	0.9934	Yes	Yes	Yes	Yes	13	13	0.99202	0.850622	0.746968	0.536364	0.348347	0.258964	0.18876	0.117587	0.99202	0.886091	0.65423	0.533743	0.349463	0.261282	0.170432	0.114125
O15294	OGT	34	34	1	0.971472	0.995834	0.958268	0.668163	0.383927	0.167213	0.0731254	1	0.963809	0.952465	0.919584	0.659054	0.366618	0.15834	0.0638296	13.5133	-0.125927	0	0.997249	13.3235	-0.126108	0	0.99371	Yes	Yes	Yes	Yes	33	33	0.99202	0.982723	0.833146	0.527133	0.312847	0.173523	0.104319	0.0526866	0.99202	0.974218	0.809263	0.543636	0.285964	0.156089	0.104855	0.0662236
O15297	PPM1D	1	1	1	1.09097	1.08979	1.02448	0.8049	0.293726	0.200681	0.258	1	1.05732	1.11004	0.986899	0.682935	0.315372	0.248519	0.0781277	13.267	-0.255851	0.228218	0.983043	13.4235	-0.134094	0.0529482	0.981095	Yes	Yes	Yes	Yes	1	1	0.99202	1.00734	0.866813	0.622874	0.355576	0.264763	0.180943	0.137396	0.99202	0.864255	0.832539	0.614771	0.382135	0.218856	0.197965	0.124827
O15304	SIVA1	1	1	1	1.0723	1.11678	1.00979	0.764714	0.352016	0.20743	0.0657179	1	1.06645	0.99327	1.07842	0.733496	0.291206	0.134273	0.0618282	13.9021	-0.142507	0.0221893	0.982483	13.4151	-0.17792	0.0481401	0.990391	Yes	Yes	Yes	Yes	2	2	0.99202	1.02941	0.804839	0.644547	0.478245	0.307892	0.262028	0.158307	0.99202	0.939559	0.721838	0.595534	0.456994	0.314431	0.267668	0.16855
O15305	PMM2	22	22	1	0.96257	0.987791	0.952789	0.755904	0.78808	0.656535	0.220532	1	0.99893	1.03454	1.01821	0.844119	0.788282	0.61399	0.212992	18.3322	-0.0752662	0	0.855893	18.223	-0.0988291	0	0.941766	Yes	Yes	Yes	Yes	16	16	0.99202	0.971442	0.887028	0.812432	0.601235	0.391303	0.223215	0.09457	0.99202	0.934914	0.944333	0.780885	0.671039	0.440989	0.23087	0.112223
O15315	RAD51B	2	2	1	1.06952	0.906735	0.962705	0.545626	0.279616	0.182334	0.105519	1	1.09685	1.14749	0.977815	0.688931	0.374518	0.23622	0.0644219	12.4548	-0.150283	0.0917379	0.986237	13.7213	-0.121371	0	0.971358	Yes	Yes	Yes	Yes	1	1	0.99202	0.987588	0.581373	0.527834	0.307885	0.204935	0.0811804	0.102662	0.99202	0.731327	0.723503	0.405245	0.259307	0.158666	0.140957	0.0778925
O15318	POLR3G	3	3	1	1.01291	1.02913	1.00596	0.772785	0.704999	0.483071	0.278219	1	1.02946	0.947577	0.974692	0.748417	0.659599	0.368703	0.192158	17.2336	-0.0718791	0	0.973381	15.9547	-0.0863209	0	0.972035	Yes	Yes	Yes	Yes	5	5	0.99202	0.919139	0.895644	0.867172	0.777214	0.675989	0.613752	0.600356	0.99202	0.961644	0.967425	0.829876	0.767553	0.706988	0.602959	0.492789
O15320-5	CTAGE5	18	18	1	1.03162	0.99844	1.00126	0.79575	0.822877	0.852982	0.531806	1	0.996656	0.992336	0.994779	0.82138	0.738337	0.680819	0.461444		-0.0324723	0	0.784286		-0.0451955	0	0.96239	Yes	Yes
O15327	INPP4B	9	9	1	1.12264	1.13607	1.12156	0.821378	0.595104	0.313926	0.092725	1	1.02391	1.02853	1.05507	0.758607	0.546604	0.283831	0.10881	15.5925	-0.118411	0	0.948354	15.0215	-0.109988	0	0.985102	Yes	Yes	Yes	Yes	12	12	0.99202	0.961597	0.991014	0.823548	0.631438	0.472904	0.344681	0.227254	0.99202	0.956636	0.916847	0.772877	0.621648	0.420477	0.301435	0.184911
O15344	MID1	9	9	1	0.986621	1.01963	0.952905	0.607948	0.277899	0.109139	0.0935815	1	1.0295	1.06107	0.982684	0.613635	0.279447	0.133749	0.0833399	12.7729	-0.149322	0.0293769	0.99889	12.8373	-0.1544	0.0451814	0.995757	Yes	Yes	Yes	Yes	14	14	0.99202	1.0548	0.955806	0.778883	0.461982	0.299946	0.198819	0.11328	0.99202	0.951462	0.920686	0.74046	0.414858	0.274946	0.177237	0.12251
O15347	HMGB3	18	18	1	1.03889	1.20318	1.08883	0.802756	0.842932	0.870649	0.792224	1	0.949739	0.953509	0.904956	0.75035	0.659161	0.704484	0.535049		-0.0975567	0.82564	0.647067		-0.0349266	0	0.934427	Yes	Yes			15	15	0.99202	0.89549	0.912725	0.759544	0.703402	0.624382	0.511725	0.386542	0.99202	0.963984	0.96628	0.78891	0.735574	0.606646	0.466845	0.353648
O15355	PPM1G	37	37	1	1.00565	1.00038	1.00318	0.802288	0.839184	0.759006	0.424269	1	1.01366	1.04649	1.01668	0.858704	0.802143	0.975452	0.57288		-0.0537986	0	0.86741		-0.0317715	0	0.626112	Yes	Yes			45	45	0.99202	0.86945	0.839179	0.802433	0.675529	0.575738	0.523343	0.516441	0.99202	0.898249	0.881022	0.807927	0.783435	0.661506	0.586873	0.529612
O15357	INPPL1	27	27	1	1.03524	1.03955	1.00671	0.782138	0.550267	0.228016	0.101897	1	0.989116	0.9963	0.952609	0.74958	0.526681	0.216953	0.0978525	14.9484	-0.119363	0	0.989977	14.6154	-0.11488	0	0.990783	Yes	Yes	Yes	Yes	25	25	0.99202	0.97347	0.929735	0.741733	0.438902	0.25011	0.171483	0.109515	0.99202	0.919067	0.926217	0.71067	0.405821	0.22807	0.165549	0.108198
O15360	FANCA	8	8	1	0.994885	0.96992	0.900709	0.480193	0.162158	0.0761701	0.0572262	1	0.993864	0.988727	0.871815	0.466236	0.17151	0.0537611	0.0229904	11.8046	-0.168569	0.011712	0.998946	11.6691	-0.165123	0	0.99886	Yes	Yes	Yes	Yes	5	5	0.99202	0.88038	0.713838	0.488122	0.336006	0.244799	0.153236	0.0995453	0.99202	0.880129	0.601737	0.493955	0.28845	0.182918	0.177275	0.116013
O15370	SOX12	1	1	1	0.874526	0.937353	0.994304	0.716422	0.615644	0.64609	0.582797	1	1.43866	1.42162	1.28343	1.1381	0.914684	0.577518	0.418025		-0.13997	0.612086	0.898797	18.9006	-0.133998	0.382402	0.52492	Yes	Yes			1	1	0.99202	1.23421	0.851005	0.876752	0.830998	0.627338	0.646272	0.612075	0.99202	1.26355	1.17809	1.01296	0.738065	0.710816	0.803817	0.487805
O15371	EIF3D	57	57	1	0.933201	1.05701	1.01131	0.72395	0.350498	0.110214	0.056144	1	0.960511	0.973622	0.909241	0.678622	0.328562	0.112908	0.0475912	13.6131	-0.152457	0	0.992077	13.2357	-0.142043	0	0.993992	Yes	Yes	Yes	Yes	50	50	0.99202	1.01378	0.921812	0.382764	0.179268	0.105296	0.0710815	0.0403648	0.99202	1.07875	0.952974	0.4289	0.174956	0.117942	0.0825958	0.0549916
O15372	EIF3H	35	35	1	1.15392	1.18642	1.12462	0.912274	0.806375	0.536929	0.193936	1	1.0301	1.08122	1.00604	0.84788	0.704213	0.421626	0.176041	17.913	-0.117823	0	0.900647	16.7499	-0.101224	0	0.977836	Yes	Yes	Yes	Yes	39	39	0.99202	1.01434	1.09761	1.10977	0.974166	0.762173	0.519095	0.29226	0.99202	1.08184	1.08971	1.05841	1.0137	0.778216	0.506471	0.286087
O15379-2	HDAC3	7	7	1	0.953116	0.987015	0.963282	0.684924	0.448726	0.20918	0.0500531	1	1.01046	1.04939	0.990898	0.747517	0.475883	0.234442	0.0746865	13.9065	-0.119228	0	0.988904	14.4269	-0.119284	0	0.992833	Yes	Yes	Yes	Yes
O15382	BCAT2	24	24	1	0.922467	0.979973	1.00186	0.774378	0.795898	0.864405	0.765892	1	1.04988	1.08498	1.04662	0.842042	0.791688	0.769342	0.75103		-0.238089	0.80013	0.827697		-0.112892	0.769994	0.909507	Yes	Yes			28	28	0.99202	0.945827	0.949772	0.93284	0.848023	0.731281	0.591656	0.389302	0.99202	0.982391	0.999553	0.922824	0.950725	0.826762	0.60788	0.374788
O15392-2	BIRC5	1	1	1	1.00695	1.10618	0.999537	0.878039	0.525825	0.415797	0.359862	1	0.978752	1.10793	0.924498	0.61617	0.497047	0.357209	0.177535	15.4177	-0.130192	0.355651	0.981635	14.2992	-0.0834953	0	0.971657	Yes	Yes		Yes	5	5	0.99202	1.02395	1.01071	0.84521	0.75503	0.66089	0.572024	0.544024	0.99202	0.910088	0.954223	0.920339	0.783546	0.76217	0.598225	0.568031
O15397	IPO8	15	15	1	0.97187	0.996323	0.884575	0.518817	0.217806	0.0972675	0.0608304	1	1.0239	1.01585	0.88646	0.522706	0.214689	0.101634	0.0578674	12.0574	-0.145691	0	0.999006	12.0799	-0.146359	0	0.998988	Yes	Yes	Yes	Yes	12	12	0.99202	0.835499	0.664536	0.421128	0.234003	0.136303	0.0818959	0.0468527	0.99202	0.899166	0.634634	0.414716	0.216511	0.130599	0.0904555	0.0557312
O15400	STX7	14	14	1	0.987003	1.02627	1.02819	0.824449	0.983448	1.09834	1.05138	1	1.00522	1.05123	1.00217	0.855843	0.838762	0.861261	0.817226		0.00989127	1.13141	0.155424		-0.377793	0.839083	0.94125	Yes	Yes			13	13	0.99202	0.975333	0.959339	0.925234	0.893387	0.878762	0.800885	0.760924	0.99202	1.01069	1.05056	0.955431	1.00911	0.882333	0.775512	0.716715
O15417	TNRC18	2	2	1	1.08901	1.18693	0.889124	0.456957	0.255663	0.172448	0.111667	1	0.889132	0.959247	0.742898	0.461243	0.240501	0.139384	0.047595	11.7671	-0.152878	0.100963	0.967514	11.2546	-0.123641	0	0.983332	Yes	Yes	Yes	Yes
O15427	SLC16A3	11	11	1	1.00269	0.951074	0.878031	0.588631	0.296732	0.112863	0.0384482	1	1.04265	1.02116	0.929235	0.610828	0.307239	0.122352	0.0430884	12.5824	-0.134752	0	0.993924	12.8618	-0.13911	0	0.996681	Yes	Yes	Yes	Yes	14	14	0.99202	0.880773	0.742459	0.509982	0.384959	0.249748	0.159432	0.094153	0.99202	0.89904	0.733463	0.550166	0.349964	0.22739	0.163587	0.0952291
O15431	SLC31A1	3	3	1	0.906067	0.855648	0.89487	0.568372	0.33934	0.135135	0.0293999	1	1.1354	1.03456	0.929729	0.587765	0.299904	0.17272	0.0423352	12.64	-0.127748	0	0.964231	12.7791	-0.131185	0	0.982944	Yes	Yes	Yes	Yes	2	2	0.99202	0.840056	0.838984	0.640347	0.518971	0.431149	0.373405	0.218164	0.99202	0.992526	0.914411	0.661455	0.553343	0.318036	0.28218	0.248755
O15438-4	ABCC3	2	2	1	0.972326	0.998572	0.974766	0.686734	0.365928	0.176705	0.0649674	1	1.01082	1.08629	1.1264	0.726994	0.377198	0.195336	0.0819383	13.57	-0.130399	0	0.998108	13.8543	-0.144376	0.0443615	0.976027	Yes	Yes	Yes	Yes	2	2	0.99202	0.944119	0.80255	0.633386	0.464453	0.263695	0.246393	0.166653	0.99202	0.979997	0.831005	0.658022	0.476615	0.302952	0.263503	0.16776
O15439	ABCC4	26	26	1	1.00709	0.985874	0.930905	0.614662	0.283365	0.115424	0.0515657	1	1.01522	1.052	0.954319	0.606991	0.283337	0.118745	0.0578808	12.815	-0.143318	0	0.999238	12.8227	-0.144155	0	0.997401	Yes	Yes	Yes	Yes	22	22	0.99202	0.908273	0.778349	0.54744	0.371567	0.237596	0.156685	0.0936425	0.99202	0.92843	0.713695	0.555312	0.344566	0.226058	0.159642	0.105935
O15440	ABCC5	4	4	1	0.958097	1.07149	0.915613	0.517419	0.198072	0.113749	0.0813506	1	0.993387	1.06172	0.988658	0.595995	0.242058	0.0898616	0.076957	12.0642	-0.163301	0.0437628	0.99436	12.6247	-0.174302	0.0432202	0.996268	Yes	Yes	Yes	Yes	1	1	0.99202	0.723614	0.807647	0.528024	0.202674	0.137818	0.0877218	0.087034	0.99202	0.98578	0.653776	0.513511	0.312317	0.139839	0.122382	0.127763
O15446-2	CD3EAP	16	16	1	0.980606	0.917168	0.790726	0.447123	0.367188	0.372371	0.417571	1	0.981443	0.941646	0.787457	0.427204	0.321331	0.312613	0.321123	11.0025	-0.182576	0.381904	0.984106	11.034	-0.160745	0.300842	0.994649	Yes	Yes			18	18	0.99202	0.979075	0.987949	1.0263	1.25308	1.42498	1.46421	1.51688	0.99202	1.0645	0.953004	1.09484	1.41137	1.55673	1.52479	1.40555
O15455	TLR3	1	1	1	0.8137	0.868761	0.919702	0.429324	0.375935	0.180887	0	1	0.790544	0.933989	0.724954	0.596681	0.228921	0.163302	0.0676915	12.1548	-0.123181	0	0.915716	11.7844	-0.113689	0	0.922766	Yes	Yes	Yes	Yes
O15460	P4HA2	16	16	1	1.36108	1.43214	1.37399	0.952392	0.667896	0.345596	0.0930979	1	1.02049	1.17999	1.19195	0.882757	0.571926	0.270033	0.101349	16.345	-0.139565	0	0.736239	15.5399	-0.132963	0	0.940433	Yes	Yes		Yes	15	15	0.99202	0.942602	0.851946	0.787285	0.498055	0.354237	0.259216	0.148618	0.99202	0.958329	0.828769	0.674897	0.476448	0.316695	0.220562	0.145107
O15479	MAGEB2	15	15	1	0.927562	0.981643	0.884301	0.550194	0.32267	0.188161	0.0595795	1	0.991861	0.978783	0.85629	0.527581	0.297547	0.164529	0.0632236	12.5544	-0.118888	0	0.991404	12.2459	-0.121347	0	0.997781	Yes	Yes	Yes	Yes	5	5	0.99202	1.00486	1.11516	0.981651	0.707909	0.391563	0.230643	0.123522	0.99202	1.25014	1.0274	0.98405	0.595374	0.357447	0.267614	0.163583
O15481	MAGEB4	3	3	1	0.925248	0.917746	0.811075	0.533913	0.270729	0.143121	0.0382508	1	1.04012	1.00241	0.908726	0.580355	0.26901	0.158831	0.0265778	11.9803	-0.123933	0	0.983024	12.5874	-0.136756	0	0.996001	Yes	Yes	Yes	Yes
O15484	CAPN5	3	3	1	1.08369	1.21551	1.1002	0.570845	0.342775	0.2875	0.191225	1	1.0077	0.96498	0.934408	0.561825	0.351767	0.193781	0.149359	12.4532	-0.221893	0.255248	0.940477	12.7845	-0.12186	0.0770082	0.996681	Yes	Yes	Yes	Yes	1	1	0.99202	0.864355	0.6287	0.543627	0.28669	0.30467	0.198935	0.162595	0.99202	0.792141	0.618208	0.488817	0.334198	0.287113	0.233902	0.171989
O15498	YKT6	21	21	1	1.04721	1.02411	1.02708	0.865269	0.954082	1.01703	0.582058	1	1.02909	1.05043	1.01129	0.903412	0.865309	0.850838	0.528688		0	0	0.857925		-0.0701372	0	0.889219	Yes	Yes			19	19	0.99202	0.99847	0.922044	0.890495	0.867229	0.793721	0.552578	0.191026	0.99202	0.989541	0.971247	0.918498	0.978992	0.869104	0.580097	0.200111
O15504	NUPL2	2	2	1	0.994939	1.11337	1.04458	0.652451	0.453898	0.277061	0.160252	1	1.0935	1.13214	0.997585	0.668559	0.423907	0.220137	0.189032	14.0294	-0.109414	0.0800723	0.973439	13.7378	-0.119645	0.110217	0.972197	Yes	Yes	Yes	Yes
O15511	ARPC5	15	15	1	1.01471	0.954282	0.956701	0.843852	0.881175	0.90229	0.694742	1	1.03221	1.00677	0.967782	0.874531	0.800914	0.711678	0.585661		-0.0169977	0	0.727294		-0.0352106	0	0.986958	Yes	Yes			23	23	0.99202	0.966763	0.92104	0.865255	0.900357	0.828139	0.688189	0.473653	0.99202	1.00242	1.02339	0.872946	0.983599	0.851218	0.698347	0.436791
O15514	POLR2D	7	7	1	1.02081	1.0071	1.07534	0.928481	1.07851	1.24634	1.04135	1	1.09037	1.06697	1.02489	0.975417	0.93506	0.985867	0.902938		0.294887	1.14384	0.462241			0	0.399022	Yes	Yes			9	9	0.99202	0.994439	0.948337	0.884106	0.94834	0.856879	0.79456	0.766196	0.99202	0.951396	0.988348	0.840672	0.926909	0.793154	0.699034	0.648099
O15516	CLOCK	1	1	1	1.13453	1.09239	1.10692	0.674795	0.496863	0.380782	0.297645	1	1.06822	1.0799	1.01213	0.661258	0.381443	0.286628	0.239814	14.1562	-0.125029	0.319654	0.942232	13.3361	-0.146026	0.236015	0.986311	Yes	Yes		Yes	5	5	0.99202	0.901058	0.840054	0.755097	0.595833	0.500638	0.413496	0.359141	0.99202	0.89921	0.789417	0.727406	0.648306	0.520717	0.445441	0.368639
O15528	CYP27B1	1	1	1	0.872946	0.744937	0.776517	0.516622	0.284004	0	0.122829	1	0.896125	0.827716	1.16519	0.900851	0.604909	0.217381	0.32972	11.5473	-0.122826	0	0.890613	15.0665	-1.69541	0.27355	0.890465	Yes	Yes	Yes	Yes	1	1	0.99202	1.3019	1.07703	1.00104	0.673422	0.431185	0.445154	0.275881	0.99202	0.904815	0.79858	0.791301	0.988136	0.615567	0.58247	0.394151
O15530	PDPK1	13	13	1	1.00397	1.0187	0.970446	0.603259	0.300318	0.131634	0.0567346	1	1.03049	1.0693	1.00295	0.66246	0.331194	0.144174	0.0763787	12.8896	-0.140646	0	0.998524	13.3117	-0.140752	0.010578	0.993814	Yes	Yes	Yes	Yes	14	14	0.99202	0.959884	0.760481	0.485188	0.316363	0.192974	0.133722	0.0880267	0.99202	0.920816	0.710984	0.509982	0.307144	0.208166	0.153747	0.0933479
O15533-3	TAPBP	3	3	1	1.01327	1.11861	0.924984	0.77818	0.690989	0.733729	0.387148	1	1.01373	0.934255	0.951197	0.767904	0.58299	0.498096	0.347085	20.8182	-0.0448258	0	0.861993	17.0771	-0.0606551	0	0.986342	Yes	Yes	Yes	Yes	2	2	0.99202	0.876889	0.756049	0.666086	0.677838	0.504681	0.365127	0.284429	0.99202	0.959519	0.896009	0.726075	0.634603	0.465304	0.348562	0.259135
O15534	PER1	6	6	1	1.03498	0.991477	0.957926	0.739731	0.623349	0.395183	0.171927	1	1.00681	1.01108	0.997804	0.742984	0.491268	0.317444	0.149463	15.7526	-0.0845994	0	0.977359	14.8078	-0.0989505	0	0.995509	Yes	Yes	Yes	Yes	10	10	0.99202	0.956837	0.899811	0.807756	0.696077	0.528931	0.516192	0.393073	0.99202	0.966027	0.899041	0.834853	0.726713	0.617387	0.512634	0.399447
O15541	RNF113A	5	5	1	0.986393	0.962366	0.993862	0.712171	0.541605	0.560493	0.49909	1	1.03385	1.03781	0.977978	0.766915	0.536983	0.460495	0.437321		-0.141541	0.524925	0.990618	16.0314	-0.102081	0.416994	0.994804	Yes	Yes			3	3	0.99202	0.984857	0.936799	0.813494	0.597953	0.46867	0.385078	0.386502	0.99202	1.05394	1.02718	0.905758	0.707941	0.546563	0.442969	0.442602
O15550	KDM6A	1	1	1	1.07566	1.03483	1.03406	0.517709	0.384615	0.375685	0.133758	1	1.33951	1.03747	1.14835	0.555986	0.26508	0.264815	0.2079	12.4104	-0.172654	0.261128	0.955645	12.1553	-0.407827	0.244592	0.902855	Yes	Yes	Yes	Yes
O15551	CLDN3	2	2	1	0.991705	0.959337	1.01449	0.794358	0.970181	1.1691	0.996277	1	1.02009	0.982221	0.88108	0.851201	0.897911	0.978065	0.883789			0.983958	0.00340876		-0.277749	0.898409	0.677722	Yes	Yes			4	4	0.99202	0.886936	0.884579	0.87863	0.960657	0.844524	0.783631	0.657834	0.99202	0.919505	0.993516	0.898638	0.904949	0.851062	0.769693	0.585183
O15554	KCNN4	2	2	1	3.24764	3.73036	3.17453	1.71432	1.36682	0.684697	0.264853	1	0.849591	1.39344	1.50657	0.885769	0.481316	0.160706	0.16799			1.5	-0.0842256	14.7539	-0.180489	0.118311	0.757714	Yes	Yes			4	4	0.99202	0.900996	0.718274	0.580383	0.325754	0.186423	0.127077	0.0633715	0.99202	0.890323	0.761888	0.574683	0.251396	0.196541	0.121436	0.0783664
O43143	DHX15	93	93	1	1.05641	1.09278	1.03939	0.859191	0.956366	0.99076	0.762115	1	1.03144	1.05383	0.994546	0.835274	0.805663	0.76918	0.61606			0	0.58436		-0.029817	0	0.929827	Yes	Yes			80	80	0.99202	1.00455	0.995553	0.920414	0.786009	0.487524	0.225862	0.119608	0.99202	0.98089	0.99357	0.881679	0.806133	0.481376	0.216699	0.114294
O43148-2	RNMT	21	21	1	1.00696	1.03779	1.00389	0.759996	0.635828	0.39369	0.0859352	1	1.01225	1.05654	0.997087	0.819652	0.647925	0.435919	0.117871	15.7745	-0.100214	0	0.963774	16.2866	-0.100097	0	0.971288	Yes	Yes	Yes	Yes	20	20	0.99202	0.981072	0.958583	0.857536	0.696018	0.48464	0.272885	0.144179	0.99202	0.944235	0.888962	0.830003	0.705579	0.473494	0.261191	0.152697
O43149	ZZEF1	21	21	1	0.991551	1.00095	0.936477	0.608764	0.283329	0.144692	0.13275	1	0.988418	1.02007	0.987469	0.635265	0.309279	0.166924	0.103577	12.7518	-0.145585	0.0729323	0.999328	13.0505	-0.145786	0.0638718	0.998638	Yes	Yes	Yes	Yes	13	13	0.99202	0.954495	0.862933	0.595157	0.362807	0.235947	0.156345	0.118215	0.99202	0.991769	0.787451	0.602584	0.361557	0.247816	0.173196	0.125318
O43150	ASAP2	5	5	1	1.00894	1.23187	1.17359	0.757945	0.451901	0.271676	0.201984	1	0.984756	1.14748	1.02279	0.796587	0.491763	0.249043	0.125716	14.3032	-0.135432	0.175403	0.922275	14.8172	-0.116855	0	0.977159	Yes	Yes	Yes	Yes	9	9	0.99202	0.974373	0.98602	0.783465	0.60358	0.358078	0.225508	0.158179	0.99202	0.979542	0.981279	0.890843	0.654381	0.390094	0.247643	0.151798
O43156	TTI1	15	15	1	0.929385	0.998963	0.974127	0.582589	0.250572	0.0809632	0.0359075	1	1.02348	1.00918	0.971483	0.60733	0.261159	0.0944079	0.0463256	12.6122	-0.161404	0	0.995134	12.7639	-0.156529	0	0.999098	Yes	Yes	Yes	Yes	17	17	0.99202	0.855332	0.710164	0.498044	0.340435	0.196559	0.116254	0.0681462	0.99202	0.906379	0.65592	0.502111	0.307765	0.19167	0.12583	0.0865871
O43164	PJA2	5	5	1	1.09712	1.23827	1.06405	0.716286	0.635344	0.481408	0.29491	1	0.864528	0.997512	0.980192	0.670782	0.478807	0.316187	0.275845	16.8048	-0.0690824	0	0.884027	14.2166	-0.102366	0.205594	0.967956	Yes	Yes	Yes	Yes	8	8	0.99202	0.875649	0.921416	0.791705	0.639006	0.618308	0.653864	0.626816	0.99202	0.928718	0.831797	0.792932	0.783136	0.726922	0.698069	0.655799
O43166	SIPA1L1	2	2	1	1.11662	1.15992	1.02233	0.688462	0.470243	0.236183	0.191519	1	0.971317	1.00021	0.995134	0.683865	0.385774	0.27748	0.195101	14.1705	-0.111122	0.0856669	0.957134	13.6298	-0.12859	0.168208	0.997248	Yes	Yes	Yes	Yes	1	1	0.99202	1.04533	0.785558	0.581212	0.696467	0.303486	0.0761956	0.098664	0.99202	1.39801	1.11132	0.937365	0.49734	0.490589	0.293801	0.17198
O43167	ZBTB24	2	2	1	0.864894	0.891436	0.81613	0.490853	0.331416	0.217061	0.107038	1	0.945432	0.985612	0.786003	0.500376	0.33168	0.237517	0.11445	12.036	-0.104104	0	0.96447	12.055	-0.101586	0	0.993746	Yes	Yes	Yes	Yes	2	2	0.99202	0.997147	1.06237	0.808032	0.595301	0.537847	0.340891	0.177099	0.99202	1.27352	0.806094	0.856978	0.673682	0.403382	0.266676	0.193739
O43169	CYB5B	24	24	1	1.09219	1.00216	1.03794	0.892083	1.03558	1.18565	1.30579	1	0.987773	1.0722	1.03241	0.931918	0.96891	1.02406	1.11904		0.0651116	1.3463	0.806938		0.080832	1.02476	0.055426	Yes	Yes			18	18	0.99202	1.04831	0.96405	0.926742	0.907506	0.882544	0.868936	0.869278	0.99202	0.937838	1.01726	0.93286	1.09879	0.995112	0.900647	0.893869
O43172-2	PRPF4	27	27	1	1.03249	1.02327	1.04148	0.779288	0.521549	0.192381	0.066561	1	1.03334	1.03031	0.978586	0.767832	0.55159	0.202332	0.0731931	14.7102	-0.131235	0	0.988945	14.7951	-0.124014	0	0.986434	Yes	Yes	Yes	Yes
O43175	PHGDH	56	56	1	1.05367	1.03942	0.970712	0.627539	0.308373	0.111241	0.0564883	1	1.01547	1.0213	0.93708	0.645991	0.301941	0.146008	0.0492589	13.0064	-0.14471	0	0.995549	13.0643	-0.138853	0	0.998608	Yes	Yes	Yes	Yes	69	69	0.99202	0.944333	0.832858	0.590633	0.37123	0.215712	0.135763	0.0782107	0.99202	0.93814	0.820448	0.613794	0.367926	0.221886	0.139948	0.0885076
O43181	NDUFS4	8	8	1	0.93048	0.876409	0.841317	0.569659	0.38282	0.450915	0.391771	1	0.989708	0.996608	0.928532	0.612768	0.401155	0.34549	0.351209	13.0426	-0.10977	0.371555	0.946672	13.1819	-0.126749	0.32043	0.999095	Yes	Yes			9	9	0.99202	0.893569	0.882148	1.01423	0.931091	0.907448	0.864199	0.873205	0.99202	0.997462	1.03226	1.05802	1.08245	1.06946	0.947217	0.853837
O43237	DYNC1LI2	17	17	1	0.944193	0.96034	0.931459	0.658353	0.369944	0.130424	0.0732486	1	1.02926	1.04401	1.00716	0.704756	0.407142	0.154356	0.0649826	13.3206	-0.129815	0	0.99237	13.8023	-0.133516	0	0.993968	Yes	Yes	Yes	Yes	23	23	0.99202	0.908371	0.850136	0.805742	0.648635	0.447777	0.317898	0.232226	0.99202	0.957282	0.86726	0.811041	0.719475	0.479152	0.334243	0.224011
O43240	KLK10	1	1	1	0.963512	0.898631	1.03136	0.726213	0.567789	0.748139	0.837026	1	0.645366	1.03268	0.948102	0.537526	0.603106	0.481588	0.451962		-0.601179	0.717652	0.714702		-0.195432	0.507761	0.659311	Yes	Yes			1	1	0.99202	1.14281	0.814181	0.876661	0.751729	0.515395	0.474179	0.336258	0.99202	0.682534	0.532479	0.864015	0.630975	0.574984	0.481339	0.122981
O43242	PSMD3	46	46	1	1.03189	1.01291	0.983931	0.714719	0.332121	0.0710605	0.025954	1	1.01429	1.02569	0.97522	0.758455	0.383777	0.115567	0.0325077	13.4388	-0.164457	0	0.996582	13.8584	-0.153703	0	0.99713	Yes	Yes	Yes	Yes	51	51	0.99202	0.953101	0.838703	0.600125	0.414294	0.261848	0.152611	0.0724594	0.99202	0.964229	0.798187	0.652722	0.427571	0.258731	0.160007	0.0857741
O43251-8	RBFOX2	7	7	1	1.12711	1.1263	0.995966	0.665193	0.390304	0.31011	0.209355	1	1.03869	1.02733	0.87857	0.52885	0.286268	0.187588	0.143066	13.5616	-0.12749	0.200675	0.965536	12.2499	-0.127583	0.0780826	0.99778	Yes	Yes	Yes	Yes	7	7	0.99202	0.907321	0.81761	0.605991	0.434709	0.306641	0.253336	0.182435	0.99202	0.946638	0.724686	0.579975	0.394521	0.284784	0.237981	0.17469
O43252	PAPSS1	47	47	1	0.940132	0.987123	1.00566	0.795655	0.850069	0.734072	0.136634	1	1.01607	1.01274	1.00878	0.850857	0.842717	0.746564	0.219886	18.9524	-0.236574	0	0.88734	19.2122	-0.176636	0	0.916405	Yes	Yes	Yes	Yes	43	43	0.99202	0.97024	0.923096	0.81866	0.58322	0.268872	0.113356	0.0582858	0.99202	0.962676	0.927867	0.800811	0.630725	0.286567	0.119144	0.0704745
O43255	SIAH2	1	1	1	0.893629	0.99462	1.01862	0.735883	0.759767	0.800595	0.647756	1	1.06212	0.971671	1.00706	0.810719	0.754922	0.648176	0.612845		-0.562662	0.735999	0.824448		-0.0479851	0.557563	0.960155	Yes	Yes			1	1	0.99202	0.973947	1.00485	0.892484	0.825205	0.723336	0.70158	0.564622	0.99202	0.965605	0.998575	0.928761	0.871594	0.799107	0.649692	0.552447
O43257	ZNHIT1	1	1	1	1.04928	1.00083	0.853724	0.488248	0.294685	0.146238	0.113715	1	0.925182	1.09688	1.00309	0.704746	0.343842	0.154916	0.05867	12.0275	-0.121505	0.0140834	0.996836	13.5652	-0.141683	0	0.986499	Yes	Yes	Yes	Yes	1	1	0.99202	0.816742	0.685642	0.579823	0.291776	0.169228	0.134715	0.0810935	0.99202	0.830648	0.704588	0.628539	0.444444	0.356139	0.16775	0.132727
O43264	ZW10	28	28	1	1.0097	1.02774	0.910004	0.516542	0.190556	0.0798268	0.0596332	1	0.999072	1.0281	0.931067	0.529364	0.190024	0.0779293	0.0520627	12.0557	-0.160827	0.00588221	0.999019	12.1603	-0.168589	0.010121	0.99931	Yes	Yes	Yes	Yes	27	27	0.99202	0.889609	0.724324	0.483241	0.320884	0.215155	0.147096	0.088969	0.99202	0.910771	0.664473	0.491441	0.305563	0.20617	0.142583	0.0945354
O43278-2	SPINT1	21	21	1	1.00919	1.00314	1.02485	0.824308	0.917582	1.04481	1.07722	1	1.02784	1.07878	1.09254	0.889575	0.900628	0.939244	0.938736		-0.0109886	0.971767	0.0529387		-0.0333628	0.915568	0.556719	Yes	Yes			23	23	0.99202	0.977058	0.962025	0.918841	0.893384	0.822332	0.790616	0.722007	0.99202	0.9595	0.968233	0.877799	0.924005	0.868343	0.746683	0.623471
O43286	B4GALT5	2	2	1	0.953115	0.998778	1.09185	0.758395	0.780837	0.518016	0.0381617	1	0.986618	1.13117	1.24485	1.26899	1.34121	1.31743	0.236661	17.3082	-0.137763	0	0.894093		0.338045	1.09005	0.0152473	Yes	Yes	Yes		2	2	0.99202	1.07427	0.866214	0.864234	0.648771	0.54501	0.50715	0.399007	0.99202	0.903942	0.918428	0.902272	0.673075	0.606558	0.409413	0.478847
O43290	SART1	20	20	1	0.918863	1.00026	0.741386	0.321971	0.141779	0.102896	0.0551426	1	0.965238	0.892873	0.75479	0.310497	0.137413	0.0964946	0.0572738	10.5229	-0.163834	0.0274122	0.994364	10.5118	-0.163801	0.0216954	0.990569	Yes	Yes	Yes	Yes	16	16	0.99202	0.908436	0.875298	0.753799	0.648004	0.580792	0.560809	0.537673	0.99202	0.999043	0.861559	0.786178	0.650859	0.569699	0.497409	0.444371
O43291	SPINT2	14	14	1	1.04046	0.994833	0.992678	0.797681	0.889624	0.902572	0.851829	1	1.07019	1.13823	1.07963	0.870158	0.814499	0.862519	0.747978		-0.36638	0.860427	0.837586		-0.138477	0.808283	0.740126	Yes	Yes			7	7	0.99202	0.914509	0.835562	0.811648	0.756893	0.673779	0.550306	0.544578	0.99202	0.849415	0.890579	0.822606	0.815661	0.645783	0.613638	0.50184
O43292	GPAA1	8	8	1	1.09021	1.02572	0.95323	0.647326	0.351516	0.199914	0.137051	1	1.0222	1.03248	0.924017	0.584781	0.320319	0.171218	0.106113	13.2966	-0.124205	0.0584119	0.99186	12.8267	-0.122736	0.0131301	0.998258	Yes	Yes	Yes	Yes	9	9	0.99202	0.834288	0.696932	0.464095	0.295663	0.176022	0.117406	0.0663839	0.99202	0.893637	0.619713	0.487207	0.266257	0.169254	0.107266	0.0683242
O43293	DAPK3	5	5	1	0.950034	0.922996	0.709315	0.303522	0.149972	0.0816164	0.0857191	1	0.994947	0.905149	0.68611	0.277963	0.146743	0.111338	0.0728386	10.2974	-0.156916	0.024542	0.994074	10.0977	-0.15546	0.026219	0.994474	Yes	Yes	Yes	Yes	7	7	0.99202	0.783499	0.512708	0.266316	0.190897	0.134716	0.0799551	0.0439185	0.99202	0.778058	0.463567	0.32773	0.184259	0.118792	0.0788205	0.0599542
O43298	ZBTB43	1	1	1	1.07543	1.01424	1.0072	0.785567	0.698476	0.364417	0.300947	1	0.91669	1.14662	1.05777	0.792002	0.588797	0.449683	0.253394	16.6813	-0.0786982	0	0.969346	16.3991	-0.0792648	0	0.942781	Yes	Yes	Yes	Yes	2	2	0.99202	0.765442	0.72706	0.644093	0.584311	0.546539	0.499203	0.478242	0.99202	0.972116	1.00221	0.83425	0.932653	0.778695	0.491311	0.44696
O43299	AP5Z1	10	10	1	0.857784	0.916937	0.846547	0.465063	0.230136	0.122259	0.0981377	1	1.07669	1.11164	1.03959	0.652078	0.315917	0.176253	0.113481	11.6891	-0.133767	0.0143457	0.973806	13.1298	-0.158102	0.0975	0.981712	Yes	Yes	Yes	Yes	6	6	0.99202	0.971837	0.932498	0.692878	0.431219	0.326515	0.293418	0.247619	0.99202	0.961375	0.896005	0.642438	0.409304	0.330666	0.263458	0.234249
O43301	HSPA12A	18	18	1	1.04695	1.07933	1.01493	0.691653	0.521445	0.303027	0.152248	1	0.97711	1.05387	0.968172	0.678936	0.460634	0.292008	0.133987	14.7064	-0.0964361	0	0.979767	14.2279	-0.0991812	0	0.991266	Yes	Yes	Yes	Yes	26	26	0.99202	0.967342	0.895244	0.74857	0.622658	0.480922	0.384699	0.273717	0.99202	0.942022	0.908919	0.741517	0.623955	0.466134	0.369948	0.259289
O43306	ADCY6	1	1	1	1.3439	1.55597	1.3486	0.706744	0.374135	0.189945	0	1	1.10993	0.90746	0.738381	0.65103	0.351396	0	0	13.8671	-0.153513	0	0.763335	12.5694	-0.134397	0	0.931276	Yes	Yes		Yes	1	1	0.99202	0.673495	0.491912	0.373476	0.305955	0.189635	0.0846602	0	0.99202	0.778542	0.473307	0.271319	0.318025	0.0698892	0.171786	0.0854223
O43310-2	CTIF	6	6	1	1.06589	1.09308	1.01113	0.718198	0.672067	0.4415	0.135649	1	0.955707	0.936055	0.971154	0.755652	0.601374	0.325867	0.0569418	16.0917	-0.0861959	0	0.936897	15.2809	-0.108401	0	0.963476	Yes	Yes	Yes	Yes	7	7	0.99202	0.962741	0.8367	0.820352	0.681139	0.376173	0.187244	0.133645	0.99202	0.970006	0.915151	0.829324	0.668599	0.411596	0.21188	0.114983
O43312	MTSS1	2	2	1	0.984493	0.874249	0.983212	0.809107	1.22712	0.950873	1.38859	1	0.86129	1.06416	0.973318	0.767578	0.757419	1.00795	0.540409						-0.0240582	0	0.387211	No	Yes
O43314	PPIP5K2	16	16	1	0.934668	0.959478	0.887547	0.535896	0.259483	0.106833	0.104209	1	1.0001	1.01046	0.951156	0.603981	0.30273	0.138182	0.0999337	12.2447	-0.13363	0.00619884	0.993522	12.8526	-0.137796	0.0291753	0.999462	Yes	Yes	Yes	Yes	13	13	0.99202	0.91695	0.791631	0.495323	0.284608	0.163659	0.101797	0.0771913	0.99202	0.876989	0.728206	0.468568	0.254488	0.176341	0.129602	0.0719842
O43318	MAP3K7	15	15	1	1.02978	1.05427	1.04116	0.745399	0.470757	0.194145	0.0979624	1	1.02407	1.06698	1.05771	0.821293	0.500189	0.212556	0.0801763	14.369	-0.124268	0	0.990031	14.8272	-0.133747	0	0.990054	Yes	Yes	Yes	Yes	14	14	0.99202	0.97893	0.896745	0.80937	0.626134	0.420069	0.302072	0.208517	0.99202	0.974381	0.949558	0.8148	0.668597	0.447547	0.287557	0.201506
O43324	EEF1E1	23	23	1	0.953614	0.977267	0.86782	0.509828	0.266813	0.118936	0.0298552	1	1.00619	1.0103	0.899666	0.552453	0.295265	0.123165	0.0456357	12.0684	-0.135997	0	0.995247	12.4615	-0.134106	0	0.997918	Yes	Yes	Yes	Yes	16	16	0.99202	0.790282	0.606415	0.38496	0.211389	0.145271	0.126688	0.120676	0.99202	0.9871	0.608716	0.436027	0.216733	0.163123	0.160968	0.133645
O43325	LYRM1	3	3	1	0.968243	0.879853	0.933248	0.712029	0.761666	0.844789	0.730231	1	1.00352	1.04917	1.03785	0.80517	0.825849	0.834873	0.687203		-0.0279116	0.365306	0.709039		-0.179085	0.782609	0.860312	Yes	Yes			2	2	0.99202	1.00586	0.884078	0.937971	0.465038	0.283208	0.1964	0.120626	0.99202	0.900668	0.958297	0.810937	0.455066	0.323075	0.19691	0.152294
O43347	MSI1	4	4	1	1.03673	1.06421	0.909791	0.660437	0.41821	0.212978	0.158639	1	1.02296	1.08621	0.973289	0.62734	0.404617	0.208997	0.128623	13.6749	-0.102939	0	0.992748	13.5287	-0.111878	0.0102431	0.988944	Yes	Yes	Yes	Yes	6	6	0.99202	0.980826	0.792837	0.632119	0.426703	0.286768	0.171663	0.0941966	0.99202	1.0224	0.788244	0.605447	0.43095	0.269697	0.174503	0.136996
O43353	RIPK2	19	19	1	0.974063	1.01515	1.02062	0.774634	0.759459	0.740316	0.489808	1	1.00095	1.06453	1.02182	0.811852	0.727386	0.683962	0.40285		-0.0391	0	0.891579	20.153	-0.0514791	0	0.930653	Yes	Yes		Yes	19	19	0.99202	0.943698	0.922594	0.838598	0.783009	0.691559	0.637845	0.604533	0.99202	0.966514	0.997955	0.849638	0.804235	0.71639	0.639089	0.570446
O43379-4	WDR62	13	13	1	1.23897	1.2388	1.19674	0.678927	0.417733	0.175463	0.0887759	1	1.01777	1.1119	1.04855	0.676893	0.322128	0.146375	0.068944	13.8641	-0.137615	0.0307197	0.89602	13.3416	-0.152244	0.0303625	0.985585	Yes	Yes	Yes	Yes	12	12	0.99202	0.928813	0.869336	0.742697	0.541343	0.390301	0.268991	0.159627	0.99202	0.972161	0.848151	0.698194	0.549607	0.373408	0.262431	0.164095
O43390-2	HNRNPR	47	47	1	0.992724	1.01912	0.942979	0.664854	0.436731	0.165934	0.0495334	1	1.02627	1.03747	0.963028	0.680674	0.427527	0.175254	0.0600746	13.651	-0.122806	0	0.990597	13.7491	-0.123903	0	0.992767	Yes	Yes	Yes	Yes
O43390	HNRNPR	3	3	1	1.00339	1.27764	0.980597	0.661354	0.367361	0.248105	0.149698	1	0.910991	0.947357	0.940711	0.670404	0.456615	0.263457	0.0480879	13.4713	-0.126013	0.10649	0.934895	13.9311	-0.109534	0	0.973484	Yes	Yes	Yes	Yes	48	48	0.99202	1.07382	1.10353	0.847025	0.468408	0.223255	0.129482	0.0692102	0.99202	1.37263	1.0449	0.98405	0.495732	0.251371	0.151776	0.0950457
O43395	PRPF3	31	31	1	0.916152	0.936712	0.809577	0.405753	0.160234	0.0828366	0.0847011	1	0.992997	0.987951	0.868373	0.449458	0.176165	0.12606	0.0974934	11.1415	-0.15191	0.0137783	0.990088	11.5434	-0.161315	0.0592768	0.999297	Yes	Yes	Yes	Yes	22	22	0.99202	0.806665	0.606294	0.392436	0.259809	0.179194	0.14176	0.11105	0.99202	0.860788	0.588551	0.412452	0.238803	0.183185	0.145846	0.107997
O43396	TXNL1	31	31	1	1.06125	1.08035	1.00187	0.844309	0.931135	0.989148	0.499093	1	1.01272	1.06132	1.01994	0.884921	0.860009	0.921003	0.515044	20.9972	-0.322356	0	0.840874		-0.153757	0	0.830667	Yes	Yes	Yes		42	42	0.99202	0.944279	0.862787	0.776572	0.688602	0.531055	0.390376	0.273506	0.99202	0.950575	0.836137	0.737648	0.709574	0.513768	0.357785	0.245512
O43399-7	TPD52L2	33	33	1	0.973535	1.05503	1.03456	0.856051	1.04274	1.13722	0.995658	1	1.02534	1.01706	1.02768	0.860531	0.867494	0.932688	0.780397		0.0726975	1.02021	0.029371		-0.282548	0.860193	0.782857	Yes	Yes			40	40	0.99202	0.924078	0.937285	0.903748	0.875478	0.833011	0.790302	0.881551	0.99202	0.913982	0.932024	1.07547	0.958268	0.88596	0.923916	0.795731
O43402	EMC8	8	8	1	0.910735	0.927012	0.865506	0.51505	0.210939	0.0640921	0.0170015	1	0.960695	0.9976	0.931931	0.584358	0.282692	0.107547	0.0258233	11.9455	-0.154077	0	0.985904	12.6493	-0.146182	0	0.996902	Yes	Yes	Yes	Yes	7	7	0.99202	0.924869	0.697666	0.548331	0.311746	0.192147	0.116849	0.0723429	0.99202	0.91214	0.737059	0.599245	0.332931	0.236514	0.155479	0.0978646
O43414	ERI3	13	13	1	0.994833	1.01115	1.0181	0.747523	0.760354	0.662449	0.374932	1	1.01145	0.97005	0.97073	0.772655	0.70153	0.638409	0.385808	19.801	-0.0514315	0	0.908107	19.5517	-0.0500082	0	0.951406	Yes	Yes	Yes	Yes	9	9	0.99202	1.07448	0.793768	0.587802	0.377194	0.220432	0.138523	0.0723597	0.99202	0.961939	0.85063	0.591511	0.400532	0.247044	0.1723	0.101186
O43422	PRKRIR	8	8	1	0.9968	1.02301	1.00731	0.68861	0.313034	0.162064	0.0920833	1	0.970238	1.01414	0.981561	0.659509	0.295238	0.127057	0.0922831	13.3192	-0.153209	0.0574442	0.998523	13.0964	-0.1544	0.0425478	0.998759	Yes	Yes	Yes	Yes	4	4	0.99202	0.993208	1.03785	0.889978	0.605577	0.439836	0.403366	0.293838	0.99202	1.1106	1.0349	1.08607	1.00012	0.704833	0.518937	0.506563
O43426	SYNJ1	7	7	1	1.06508	1.03028	1.01837	0.832498	0.700375	0.325899	0.117741	1	1.01507	1.0093	0.970384	0.835407	0.711954	0.27837	0.124176	16.244	-0.122107	0	0.978075	16.1745	-0.13114	0	0.980412	Yes	Yes	Yes	Yes	6	6	0.99202	0.956525	0.959839	0.836794	0.462966	0.224698	0.153381	0.0892899	0.99202	0.908373	0.94787	0.760412	0.437041	0.238055	0.153531	0.107171
O43427	FIBP	7	7	1	0.991528	1.01889	0.919372	0.505613	0.213469	0.113821	0.09093	1	0.999327	1.03887	0.906832	0.548749	0.201114	0.107952	0.0899585	12.0299	-0.161823	0.0530478	0.999595	12.2116	-0.158299	0.035577	0.997628	Yes	Yes	Yes	Yes	7	7	0.99202	0.902288	0.736492	0.518613	0.305222	0.172928	0.118811	0.0688806	0.99202	0.926809	0.742515	0.507791	0.312388	0.191341	0.126928	0.0730295
O43432-3	EIF4G3	22	22	1	0.987611	1.00566	0.935065	0.592617	0.321973	0.132534	0.0624921	1	1.0172	1.00346	0.945015	0.640132	0.341553	0.148399	0.0818713	12.8394	-0.132428	0	0.998342	13.1868	-0.128999	0	0.999101	Yes	Yes	Yes	Yes	24	24	0.99202	0.949509	0.861199	0.725806	0.511041	0.371491	0.278088	0.186278	0.99202	0.972681	0.864281	0.71265	0.525141	0.381675	0.275353	0.183251
O43439-4	CBFA2T2	1	1	1	0.74991	0.678285	0.936902	0.744294	0.82873	0.670485	0.484418	1	1.09095	1.02688	1.08278	1.06859	1.32014	1.16994	0.706192			0.386009	0.375002			1.07303	0.0183225	Yes	Yes			2	2	0.99202	0.983685	0.886917	0.816881	0.655687	0.546901	0.341789	0.295777	0.99202	0.943088	0.979097	0.910178	0.757163	0.57202	0.384312	0.350126
O43447	PPIH	34	34	1	0.968232	0.99392	0.982763	0.775637	0.773325	0.773781	0.696144	1	1.00282	1.04795	1.02078	0.833925	0.744397	0.696116	0.641742		-0.0912303	0.745219	0.95628		-0.0555472	0.644659	0.972464	Yes	Yes			17	17	0.99202	1.01077	0.873489	0.702597	0.440572	0.244994	0.167212	0.105688	0.99202	0.93717	0.896666	0.707045	0.50318	0.304559	0.19874	0.120311
O43464	HTRA2	8	8	1	1.04381	1.03822	1.019	0.831402	0.600984	0.486132	0.409738	1	0.973555	1.00749	0.937488	0.706485	0.523516	0.366858	0.284139	17.1021	-0.085888	0.364911	0.990185	15.1767	-0.0778984	0.072909	0.99782	Yes	Yes		Yes	9	9	0.99202	0.961061	0.969566	0.878852	0.815486	0.702306	0.672615	0.61839	0.99202	1.01328	1.01778	0.926636	0.863161	0.786258	0.707284	0.586397
O43474	KLF4	1	1	1	0.928224	0.886415	0.954873	0.664781	0.455726	0.407781	0.200232	1	0.81726	1.01854	1.1187	0.593502	0.398766	0.309564	0.0939244	14.6287	-0.0801428	0	0.956359	13.4133	-0.129519	0.124594	0.919151	Yes	Yes	Yes	Yes
O43482	OIP5	3	3	1	0.928908	1.01849	1.04841	0.698224	0.677546	0.681395	0.47449	1	1.06861	0.941224	0.904978	0.745007	0.664903	0.516979	0.440128		-0.171731	0.608741	0.884883	18.9817	-0.0482523	0	0.976947	Yes	Yes		Yes	3	3	0.99202	0.955501	1.0272	0.804705	0.883108	0.782391	0.662799	0.586146	0.99202	0.968391	0.934853	0.811386	0.842076	0.593409	0.463283	0.381878
O43488	AKR7A2	16	16	1	1.10111	1.14737	1.11882	0.91578	0.857702	0.532959	0.0589672	1	1.04294	1.05881	1.01024	0.837049	0.694311	0.434523	0.11771	17.923	-0.19071	0	0.933695	16.6068	-0.108245	0	0.969922	Yes	Yes	Yes	Yes	15	15	0.99202	0.957139	0.877735	0.690533	0.31972	0.150931	0.0994221	0.0713619	0.99202	0.974717	0.915574	0.67264	0.291191	0.153704	0.102168	0.0682873
O43490	PROM1	10	10	1	0.911377	0.983496	0.911445	0.759794	0.922965	1.02461	0.926705	1	0.953295	0.998221	0.929796	0.843334	0.811326	0.970285	0.839351		-0.0930826	0.909095	0.0524974		-0.341504	0.866074	0.572639	Yes	Yes			11	11	0.99202	0.923534	0.973585	0.932342	0.87632	0.803945	0.75541	0.71545	0.99202	0.963182	0.965036	0.874796	0.961366	0.815578	0.712608	0.624773
O43491	EPB41L2	66	66	1	1.02733	1.01173	0.978265	0.773798	0.634372	0.399843	0.140727	1	1.01835	1.04565	0.983002	0.790318	0.595448	0.367923	0.154173	15.9287	-0.0928214	0	0.976988	15.6978	-0.0953992	0	0.988048	Yes	Yes	Yes	Yes	62	62	0.99202	0.972779	0.93418	0.900491	0.769058	0.515744	0.302762	0.182176	0.99202	0.984357	0.995952	0.902174	0.851629	0.533365	0.306552	0.189535
O43493	TGOLN2	8	8	1	0.987553	1.03723	0.982804	0.749817	0.85392	0.969924	1.02683	1	0.970082	0.984013	0.985423	0.846853	0.787997	0.92816	0.794177		-0.267742	0.900124	0.307904		-0.0795574	0.837487	0.752509	Yes	Yes			5	5	0.99202	0.937363	0.881216	0.902089	0.782122	0.822924	0.744482	0.760194	0.99202	0.923275	1.02072	0.909368	1.00381	0.877082	0.833737	0.744138
O43502	RAD51C	8	8	1	1.07845	1.08519	1.05036	0.73307	0.381688	0.128434	0.0161005	1	1.05113	1.0832	1.06199	0.759545	0.394975	0.12775	0.022074	13.7897	-0.153096	0	0.984194	13.9563	-0.155301	0	0.986485	Yes	Yes	Yes	Yes	9	9	0.99202	0.969515	0.873449	0.747743	0.551193	0.332933	0.20211	0.117139	0.99202	0.978085	0.910407	0.725164	0.545885	0.333319	0.209841	0.128256
O43504	LAMTOR5	5	5	1	1.74903	1.73197	1.87791	1.182	1.81708	2.03333	1.33112	1	1.17965	1.31	1.2799	0.989097	0.914811	0.815451	0.772873			1.5	0.192854		-0.0410079	0.755362	0.289822	Yes	Yes			2	2	0.99202	0.781274	0.982246	1.44642	1.45685	1.30003	1.09123	0.57378	0.99202	1.15272	0.92051	0.8731	0.778332	0.714644	0.476306	0.39968
O43505	B3GNT1	1	1	1	1.05507	1.02915	0.976362	0.870384	0.901888	0.963155	0.929694	1	1.00041	0.986017	0.982126	0.848801	0.765944	0.647495	0.667973		-0.204272	0.91628	0.691209		-0.0469944	0.60968	0.985758	Yes	Yes
O43513	MED7	7	7	1	0.981992	0.924995	0.891965	0.665888	0.493017	0.332577	0.160805	1	0.99207	0.962784	0.899029	0.687002	0.475764	0.275533	0.142286	14.2864	-0.085354	0	0.983873	14.153	-0.0950184	0	0.99299	Yes	Yes	Yes	Yes	4	4	0.99202	0.932955	0.941813	0.863491	0.73421	0.718801	0.616227	0.52367	0.99202	1.05329	1.08901	0.980943	0.976903	0.795151	0.684901	0.550391
O43524	FOXO3	7	7	1	1.01993	1.0551	1.04393	0.78534	0.603717	0.53459	0.415882	1	1.04644	1.11946	1.0467	0.809311	0.640205	0.452712	0.357268	17.7356	-0.0794516	0.393561	0.975697	17.003	-0.0772645	0.207458	0.962552	Yes	Yes		Yes	7	7	0.99202	0.991645	0.960179	0.893509	0.797394	0.794337	0.680331	0.648116	0.99202	0.986523	0.911734	0.857993	0.843458	0.786102	0.646823	0.607902
O43542	XRCC3	13	13	1	1.07126	1.11255	1.00694	0.608492	0.287269	0.123709	0.0659206	1	1.0009	1.10821	1.00984	0.65489	0.296967	0.128657	0.0602599	12.8701	-0.154649	0.0288691	0.984983	13.1358	-0.153063	0.0160409	0.989621	Yes	Yes	Yes	Yes	8	8	0.99202	0.917328	0.88476	0.661078	0.434442	0.247945	0.124752	0.0750506	0.99202	1.00283	0.833394	0.647665	0.397531	0.214446	0.122209	0.0833791
O43556	SGCE	2	2	1	0.938432	1.10905	0.955054	0.719617	0.595824	0.450367	0.208471	1	0.965279	1.1008	1.08276	0.892427	0.66959	0.494313	0.149691	15.8851	-0.0754362	0	0.955681	16.9383	-0.102466	0	0.955811	Yes	Yes	Yes	Yes
O43567	RNF13	6	6	1	0.551219	0.442548	0.441174	0.370459	0.316417	0.357061	0.334758	1	0.930593	0.701238	0.586922	0.431458	0.352548	0.332139	0.323392	3.96517		0	0.986846	9.85335	-0.0910743	0	0.990327	Yes	Yes		Yes	5	5	0.99202	1.16793	1.14036	0.802744	0.831707	0.75713	0.688351	0.678102	0.99202	0.981853	1.41676	1.14822	1.13578	0.942471	0.885068	0.789585
O43572	AKAP10	3	3	1	0.996127	1.02102	0.96417	0.540577	0.322026	0.232797	0.178521	1	1.06622	1.07435	0.942088	0.486293	0.316001	0.220861	0.182466	12.4464	-0.152658	0.179487	0.997517	12.0479	-0.161056	0.188416	0.988661	Yes	Yes	Yes	Yes	5	5	0.99202	1.1376	0.695539	0.55075	0.416402	0.259961	0.155372	0.130739	0.99202	0.866405	0.668716	0.481731	0.310769	0.220188	0.237811	0.124912
O43581-2	SYT7	1	1	1	1.30659	1.209	1.31219	0.675259	0.420356	0.376459	0.183537	1	1.07825	1.1119	0.963003	0.495909	0.304213	0.183505	0.105133	13.4853	-0.165343	0.27603	0.819086	12.2346	-0.152498	0.109085	0.980438	Yes	Yes	Yes	Yes	1	1	0.99202	0.843549	0.862852	0.625834	0.555609	0.471218	0.362248	0.318374	0.99202	0.808626	0.880603	0.672897	0.565626	0.451772	0.390357	0.280829
O43583	DENR	6	6	1	0.930855	0.982022	0.961477	0.714608	0.763396	0.906153	0.821846	1	1.01703	1.04393	0.977802	0.782893	0.768645	0.827092	0.774241		-0.503388	0.801501	0.676931		-0.585115	0.788218	0.957703	Yes	Yes			17	17	0.99202	1.02925	0.965611	0.951677	0.926082	0.864106	0.837642	0.818892	0.99202	0.944144	1.01179	0.921307	0.977364	0.905469	0.835984	0.709225
O43592	XPOT	23	23	1	1.01219	1.07224	0.990895	0.594354	0.288607	0.111749	0.0488236	1	1.01596	1.08293	1.01146	0.633905	0.301954	0.117103	0.0572414	12.8188	-0.148763	0	0.993825	13.0633	-0.149992	0.00435721	0.992226	Yes	Yes	Yes	Yes	21	21	0.99202	0.865166	0.76257	0.570043	0.369579	0.260229	0.175203	0.111398	0.99202	0.907355	0.70137	0.554488	0.343033	0.214935	0.160301	0.0994109
O43598	DNPH1	11	11	1	1.06451	1.1559	1.14135	0.860014	0.900519	0.878959	0.476157	1	1.03088	1.04542	0.981548	0.8212	0.776876	0.620983	0.37101	20.8693	-0.138878	0	0.77133	19.3212	-0.0597388	0	0.956784	Yes	Yes		Yes	14	14	0.99202	1.04278	0.985211	0.861227	0.867153	0.720911	0.47012	0.312415	0.99202	0.978232	1.00928	0.892322	0.883846	0.714671	0.456272	0.280992
O43615	TIMM44	40	40	1	0.909434	0.893566	0.884295	0.622719	0.292496	0.10713	0.0585932	1	1.01804	0.989961	0.932436	0.682011	0.330437	0.132461	0.0637267	12.7738	-0.136781	0	0.977479	13.3148	-0.138539	0	0.998397	Yes	Yes	Yes	Yes	35	35	0.99202	0.976223	0.885919	0.700963	0.47312	0.270999	0.170187	0.108463	0.99202	0.962942	0.91746	0.71037	0.45732	0.255788	0.172074	0.114106
O43617	TRAPPC3	7	7	1	0.95531	0.949319	0.920723	0.778193	0.816878	0.824955	0.397846	1	1.10376	1.08383	1.07041	0.909987	0.834684	0.778113	0.426233		-0.0420437	0	0.706371	20.5952	-0.0765757	0	0.886062	Yes	Yes		Yes	7	7	0.99202	0.972202	0.858431	0.84045	0.846348	0.822957	0.722591	0.636988	0.99202	0.960655	0.966519	0.863282	0.944226	0.840223	0.748707	0.565302
O43633	CHMP2A	20	20	1	1.08303	1.06961	1.04173	0.900043	0.997663	1.14132	0.795059	1	1.06402	1.05025	1.00938	0.87012	0.841837	0.823219	0.603695		0	0	0.490933		-0.0333715	0	0.883672	Yes	Yes			19	19	0.99202	0.961904	0.930412	0.905526	0.924494	0.903986	0.821652	0.731539	0.99202	1.0062	1.05121	0.878551	0.90923	0.88173	0.728426	0.602461
O43639	NCK2	17	17	1	1.00814	1.04218	1.02657	0.80818	0.882789	0.788013	0.282938	1	1.04228	1.05914	1.04748	0.843004	0.81755	0.707911	0.303484	19.6099	-0.171528	0	0.887398	19.2612	-0.088834	0	0.908894	Yes	Yes	Yes	Yes	7	7	0.99202	1.00072	0.949876	0.829965	0.507881	0.245312	0.148933	0.113135	0.99202	0.926156	0.938636	0.805943	0.544338	0.271558	0.185141	0.134053
O43657	TSPAN6	7	7	1	0.932587	1.03051	1.0472	0.885706	1.09737	1.37677	1.40667	1	1.12434	1.1535	1.14894	0.964482	1.16982	1.20777	1.20443		0.142142	1.40583	0.920378			1.14149	0.296729	Yes	Yes			6	6	0.99202	0.92024	0.895753	0.878343	0.861967	0.82831	0.813234	0.843424	0.99202	0.953615	0.992048	0.9212	0.958856	0.93835	0.873466	0.77037
O43660	PLRG1	14	14	1	0.897335	0.930395	0.828109	0.493233	0.361847	0.197593	0.137526	1	0.982549	0.983575	0.883059	0.55962	0.354798	0.237362	0.137527	12.2191	-0.102196	0	0.980318	12.849	-0.102543	0	0.998364	Yes	Yes	Yes	Yes	11	11	0.99202	0.950155	0.98004	1.1246	0.988491	0.800801	0.679142	0.614544	0.99202	1.01968	1.04415	1.12407	1.12947	0.874324	0.737375	0.620156
O43663	PRC1	10	10	1	0.949211	0.903472	0.719741	0.397193	0.128181	0.0555802	0.0474032	1	1.00319	0.858625	0.666572	0.32622	0.118862	0.0597987	0.0409468	10.6294	-0.149016	0	0.987506	10.0567	-0.15051	0	0.986961	Yes	Yes	Yes	Yes	12	12	0.99202	0.872316	0.624487	0.37492	0.230981	0.129804	0.0864929	0.0668595	0.99202	0.833579	0.580603	0.400221	0.205117	0.148466	0.10758	0.0679375
O43665-3	RGS10	9	9	1	0.995089	1.12689	1.05969	0.826148	0.946874	0.969982	0.705422	1	0.986054	0.986771	0.858812	0.754591	0.664867	0.621134	0.483237			0	0.573159		-0.0403844	0	0.985062	Yes	Yes			15	15	0.99202	0.946161	0.904692	0.837235	0.861077	0.783218	0.690725	0.64233	0.99202	0.96168	0.993974	0.908914	0.977808	0.84895	0.731144	0.620329
O43670-4	ZNF207	12	12	1	1.02087	1.16906	1.11505	0.869015	0.964881	0.98919	0.939097	1	1.00386	0.976786	1.01798	0.823178	0.770384	0.711068	0.653017		-0.0189343	0.944096	0.17323		-0.0478089	0.648356	0.968625	Yes	Yes			18	18	0.99202	0.945984	0.9807	0.958752	0.959647	0.931365	0.86906	0.876585	0.99202	0.968148	0.970321	0.899691	0.928544	0.859651	0.757363	0.675663
O43674	NDUFB5	7	7	1	1.06642	0.984097	0.966436	0.727252	0.480028	0.168774	0.0305037	1	1.0571	0.937219	0.941169	0.671975	0.449734	0.177471	0.0365592	14.1695	-0.130456	0	0.984833	13.7447	-0.122207	0	0.98192	Yes	Yes	Yes	Yes	7	7	0.99202	0.928928	0.84877	0.577246	0.357986	0.234629	0.16523	0.102923	0.99202	0.981152	0.874105	0.58629	0.31945	0.231333	0.163454	0.105869
O43676	NDUFB3	5	5	1	0.895704	1.01336	0.952933	0.814678	0.782159	0.453981	0.172029	1	0.979575	1.02172	1.00665	0.903773	0.697783	0.475354	0.14623	17.2278	-0.10749	0	0.938998	16.9984	-0.108553	0	0.982816	Yes	Yes	Yes	Yes	5	5	0.99202	1.01715	0.94214	0.858427	0.85765	0.652792	0.55902	0.406265	0.99202	0.972141	0.964008	0.856051	0.868648	0.674497	0.526856	0.372828
O43678	NDUFA2	12	12	1	0.927432	0.928985	0.864768	0.581581	0.539361	0.482234	0.612771	1	0.982998	1.01136	0.930655	0.710678	0.522017	0.864494	0.791802		-0.154171	0.543854	0.937032		-0.828878	0.722248	0.676732	Yes	Yes			9	9	0.99202	0.905875	0.967707	1.00174	0.899287	0.745518	0.59777	0.4619	0.99202	0.95165	0.95183	0.885048	0.925236	0.734469	0.589091	0.460424
O43681	ASNA1	27	27	1	0.972837	0.985634	0.965616	0.789611	0.673924	0.417791	0.136148	1	1.03076	1.02321	0.964422	0.808426	0.63044	0.39518	0.154007	16.2726	-0.095492	0	0.968172	16.0461	-0.0950452	0	0.984679	Yes	Yes	Yes	Yes	25	25	0.99202	0.940888	0.897656	0.803068	0.667272	0.451751	0.270721	0.165231	0.99202	0.965986	0.93018	0.80324	0.698783	0.469662	0.291329	0.166491
O43683	BUB1	10	10	1	1.01642	0.998598	0.919873	0.592672	0.275624	0.10093	0.0524458	1	0.975579	0.984905	0.901119	0.619181	0.288384	0.0999309	0.0457141	12.6509	-0.144046	0	0.998873	12.7815	-0.14277	0	0.996491	Yes	Yes	Yes	Yes	9	9	0.99202	0.891539	0.75568	0.509346	0.368246	0.264801	0.183326	0.136156	0.99202	0.915362	0.716064	0.551462	0.382055	0.270572	0.183378	0.12749
O43684	BUB3	25	25	1	1.04848	1.03047	1.02457	0.798351	0.815446	0.706655	0.345804	1	1.00752	1.04114	1.00751	0.821512	0.74474	0.615874	0.340856	19.6918	-0.0657215	0	0.89102	18.8491	-0.0629051	0	0.959308	Yes	Yes	Yes	Yes	21	21	0.99202	0.987972	0.897608	0.814336	0.648443	0.379638	0.162298	0.0762925	0.99202	0.951557	0.899014	0.777909	0.703534	0.410346	0.180152	0.0838233
O43688-2	PPAP2C	1	1	1	1.2879	1.14449	1.10631	0.897788	0.951634	1.06262	0.861003	1	1.02236	1.06433	0.973544	0.812338	0.806622	0.793345	0.681111		-0.0178411	0.945073	-0.00845774		-0.0351853	0.689798	0.909326	Yes	Yes			2	2	0.99202	1.19284	1.09346	0.980614	1.07921	0.994544	0.909631	0.819507	0.99202	1.04489	0.995163	0.923581	0.935682	0.864102	0.771255	0.630711
O43707	ACTN4	154	154	1	0.976077	1.00988	1.0007	0.840758	0.996981	1.18201	1.0514	1	1.0097	1.02615	0.991894	0.864963	0.88821	0.972482	0.886933		0.278885	1.1167	0.436908		-0.277467	0.903147	0.739892	Yes	Yes			173	173	0.99202	0.98395	0.952116	0.917071	0.924008	0.878058	0.806861	0.259677	0.99202	0.991105	1.02682	0.94336	1.01666	0.9249	0.813921	0.256265
O43709	WBSCR22	7	7	1	0.982751	1.03696	0.906018	0.618402	0.46128	0.306955	0.194283	1	0.960602	1.0831	0.937715	0.725072	0.507837	0.353495	0.18628	13.944	-0.0864108	0	0.994007	14.9268	-0.0867527	0	0.985311	Yes	Yes	Yes	Yes	8	8	0.99202	0.910066	0.816104	0.626674	0.43972	0.215281	0.0926273	0.0414585	0.99202	0.933959	0.832735	0.658616	0.445141	0.227705	0.0990329	0.0455821
O43715	TRIAP1	2	2	1	0.853819	1.02418	0.88329	0.661788	0.681616	0.878788	0.918834	1	1.00078	1.05196	0.890605	0.885772	0.644002	0.725672	0.627155		-0.534206	0.785257	0.389079		-0.0403022	0.549469	0.900411	Yes	Yes			2	2	0.99202	0.932416	1.06962	1.47209	1.32048	1.29481	1.22509	1.07692	0.99202	1.03198	1.06173	1.06989	1.08943	1.05302	0.935574	0.851852
O43716	GATC	5	5	1	1.00393	1.03985	0.995862	0.812101	0.834894	0.775313	0.57064	1	0.968028	0.995726	1.00167	0.861924	0.716949	0.687599	0.482296		-0.0328243	0	0.898036		-0.0451215	0	0.965441	Yes	Yes			5	5	0.99202	0.875119	0.997431	1.06992	1.03149	0.843874	0.833126	0.646851	0.99202	0.996697	0.943879	0.879052	0.88915	0.841724	0.699233	0.65401
O43719	HTATSF1	58	58	1	1.01626	1.03032	1.02271	0.819286	0.877672	0.769794	0.324691	1	1.01264	1.0648	1.06677	0.845867	0.826172	0.690297	0.297449	19.7138	-0.135433	0	0.890575	19.1495	-0.0928916	0	0.916508	Yes	Yes	Yes	Yes	45	45	0.99202	0.970148	0.878851	0.784623	0.60745	0.44202	0.364129	0.281189	0.99202	0.921378	0.904875	0.788758	0.722267	0.530437	0.397006	0.287832
O43734	TRAF3IP2	2	2	1	0.849066	0.970621	0.930119	0.579872	0.573423	0.285883	0.285922	1	0.818794	1.02007	1.04518	0.658487	0.424587	0.315612	0.309825	14.4724	-0.0767971	0.0365479	0.923273	13.3669	-0.155022	0.309377	0.94478	Yes	Yes	Yes
O43739	CYTH3	3	3	1	0.961439	0.941929	0.880697	0.713568	0.461941	0.260142	0.0846566	1	1.02785	1.04926	0.99198	0.705553	0.506791	0.267532	0.0842212	14.0982	-0.104754	0	0.981479	14.4612	-0.108294	0	0.985668	Yes	Yes	Yes	Yes	3	3	0.99202	0.916402	0.886903	0.707728	0.485927	0.260949	0.173084	0.101945	0.99202	0.948426	0.967698	0.778901	0.48256	0.306905	0.172016	0.128481
O43741	PRKAB2	8	8	1	1.02783	1.08018	1.03776	0.747471	0.478786	0.270547	0.172921	1	1.00673	1.02745	0.995131	0.687183	0.441633	0.225401	0.156658	14.5985	-0.110462	0.0613671	0.9872	14.0342	-0.110308	0.0296796	0.995739	Yes	Yes	Yes	Yes	5	5	0.99202	0.973088	0.91555	0.679256	0.53185	0.25602	0.204078	0.143552	0.99202	1.04581	0.933059	0.687884	0.402476	0.263505	0.191539	0.140139
O43747-2	AP1G1	33	33	1	0.960964	1.0464	1.02535	0.896923	0.928787	0.67327	0.0351895	1	1.02611	1.03073	1.00535	0.855011	0.800503	0.532292	0.0454442	18.487	-0.359759	0	0.975344	17.6085	-0.156312	0	0.946655	Yes	Yes	Yes	Yes	36	36	0.99202	0.975678	0.929248	0.838776	0.734174	0.496211	0.282245	0.124163	0.99202	0.973414	0.970952	0.834469	0.701438	0.446543	0.27477	0.125974
O43752	STX6	10	10	1	1.11929	1.11784	1.05446	0.929489	0.850342	0.851799	0.577029	1	1.00836	1.17636	1.12348	0.867126	0.82329	0.662864	0.513806		-0.0512281	0	0.804252		-0.0514168	0	0.851201	Yes	Yes			7	7	0.99202	0.982747	0.906746	0.916842	0.920082	0.814917	0.83365	0.835276	0.99202	0.971601	1.00016	0.913419	0.945537	0.869425	0.760568	0.686129
O43760	SYNGR2	5	5	1	1.0414	1.12016	1.19167	0.950418	1.28542	1.67026	1.66477	1	1.1818	1.21133	1.22731	1.13971	1.19284	1.31373	1.35491		0.941949	1.5	0.802752			1.5	0.658574	Yes	Yes			5	5	0.99202	0.890131	0.964336	1.14936	1.14535	1.02881	0.933626	0.554052	0.99202	0.990038	0.999321	0.908308	0.943706	0.889405	0.851669	0.691905
O43765	SGTA	26	26	1	1.05724	1.0557	1.04366	0.89087	1.01863	1.15328	1.14021	1	0.999858	1.03874	1.01658	0.869462	0.877584	0.99872	0.964856			1.12465	0.0546974		-0.0377428	0.928109	0.481133	Yes	Yes			29	29	0.99202	0.965429	0.937908	0.858345	0.833597	0.738921	0.668894	0.648786	0.99202	0.94848	0.952857	0.83202	0.883011	0.780848	0.647146	0.582342
O43766	LIAS	8	8	1	0.911206	0.930222	0.921843	0.670128	0.588275	0.565337	0.472296	1	1.0077	0.997879	0.921757	0.711424	0.610104	0.528801	0.456108		-0.0729495	0.465959	0.945587	18.8587	-0.0605523	0.348624	0.996389	Yes	Yes			8	8	0.99202	0.957329	0.807346	0.781211	0.62491	0.541543	0.479085	0.431355	0.99202	0.944766	0.906636	0.786259	0.760092	0.65813	0.547305	0.439217
O43768-4	ENSA	15	15	1	0.966686	1.00888	0.973583	0.78146	0.904011	1.05636	1.10381	1	1.00769	1.02717	1.00837	0.835558	0.850319	0.945732	0.953017		-0.0876039	0.961409	0.0205896		-0.0822311	0.896163	0.673561	Yes	Yes			15	15	0.99202	0.971296	0.930918	0.884135	0.873488	0.810935	0.815035	0.880908	0.99202	0.987903	1.00692	0.920588	1.00954	0.938718	0.852475	0.819323
O43772	SLC25A20	9	9	1	0.970347	1.0038	0.948251	0.635043	0.389547	0.199793	0.063764	1	0.999583	1.0305	0.990114	0.674367	0.360668	0.195376	0.0891101	13.3963	-0.118854	0	0.994807	13.5576	-0.12545	0.00276231	0.997591	Yes	Yes	Yes	Yes	5	5	0.99202	0.873861	0.710673	0.567297	0.378917	0.260093	0.203279	0.12585	0.99202	0.947464	0.751317	0.60292	0.387755	0.292159	0.206574	0.124512
O43776	NARS	46	46	1	0.982637	1.02635	0.946503	0.669006	0.341484	0.128725	0.0626542	1	1.04796	1.06906	1.01583	0.76365	0.395989	0.148438	0.0685815	13.2995	-0.137628	0	0.997964	14.0118	-0.143556	0	0.992993	Yes	Yes	Yes	Yes	41	41	0.99202	1.01601	0.982056	0.853772	0.389912	0.166797	0.107463	0.0723796	0.99202	0.955716	0.96532	0.837577	0.377937	0.163794	0.11135	0.0682226
O43795	MYO1B	45	45	1	1.04481	1.01216	0.88137	0.437018	0.172017	0.0800062	0.0521392	1	1.07118	1.08212	0.907972	0.465844	0.185665	0.0921769	0.0593488	11.5643	-0.164471	0.012192	0.998409	11.7841	-0.167751	0.0279862	0.991752	Yes	Yes	Yes	Yes	28	28	0.99202	0.858079	0.694127	0.449247	0.266305	0.17584	0.125662	0.0836972	0.99202	0.933971	0.641024	0.481636	0.278774	0.187953	0.141387	0.0990813
O43805	SSNA1	3	3	1	0.868177	1.12263	1.2228	0.965216	1.03968	1.19154	1.18408	1	1.18598	1.14229	1.22794	0.989778	0.950613	0.903915	0.971395		0.409712	1.12099	0.392758		-0.0212287	0.939575	-0.0689639	Yes	Yes			2	2	0.99202	1.06164	0.95781	0.993358	0.80727	0.768182	0.792187	0.693029	0.99202	0.996491	1.08397	0.882389	1.02851	0.982969	0.85902	0.77443
O43808	SLC25A17	3	3	1	1.22285	1.3541	1.16687	0.772316	0.433409	0.231129	0.222102	1	1.02373	1.11377	1.01199	0.575431	0.296855	0.188811	0.149368	14.1263	-0.149583	0.188094	0.857103	12.5896	-0.172409	0.150943	0.986009	Yes	Yes	Yes	Yes	3	3	0.99202	0.888183	0.791267	0.530286	0.31959	0.290979	0.176457	0.0966172	0.99202	0.972792	0.670674	0.493066	0.23921	0.149155	0.124639	0.0765836
O43809	NUDT21	26	26	1	0.954641	0.972601	0.82938	0.590147	0.565344	0.484848	0.473972	1	1.06131	1.0625	0.946565	0.617799	0.49302	0.72359	0.428304	17.4693	-0.0840383	0.450243	0.987681		-0.147731	0.546695	0.880074	Yes	Yes			27	27	0.99202	0.976275	0.979733	0.93299	0.86342	0.445959	0.16926	0.082597	0.99202	0.964353	1.00172	0.922865	0.878446	0.45103	0.183627	0.0935281
O43813	LANCL1	21	21	1	0.990196	1.00329	0.986376	0.763483	0.749868	0.752208	0.569347	1	1.00544	0.981056	0.940159	0.758045	0.644507	0.555732	0.440013		-0.0330529	0.249161	0.908916	19.1453	-0.04863	0.00103131	0.994799	Yes	Yes		Yes	16	16	0.99202	0.934124	0.893082	0.763711	0.652527	0.444306	0.211213	0.132924	0.99202	0.910065	0.829918	0.759852	0.675475	0.416605	0.211054	0.105638
O43815	STRN	20	20	1	1.03746	1.02692	0.993787	0.767683	0.572886	0.286646	0.107854	1	1.03528	1.08146	0.993065	0.753829	0.533992	0.275625	0.109182	15.1517	-0.108228	0	0.987325	14.8681	-0.108228	0	0.985184	Yes	Yes	Yes	Yes	27	27	0.99202	0.98947	0.957016	0.845266	0.738592	0.603546	0.353446	0.175246	0.99202	0.949641	0.908158	0.830554	0.778207	0.596728	0.340717	0.17275
O43818	RRP9	7	7	1	0.918723	0.885184	0.846808	0.582523	0.469067	0.348551	0.254698	1	1.03246	0.982729	0.836761	0.572064	0.419632	0.332654	0.239794	13.7995	-0.0733416	0	0.970194	13.33	-0.0834955	0.0678808	0.99734	Yes	Yes	Yes	Yes	9	9	0.99202	0.869518	0.959224	0.982677	0.897295	0.68144	0.539751	0.336759	0.99202	0.930375	0.934862	0.959807	0.943368	0.734086	0.55414	0.343409
O43819	SCO2	11	11	1	1.01023	1.01812	0.884299	0.550533	0.244823	0.091387	0.0239335	1	1.04618	1.01275	0.928395	0.603499	0.251278	0.113202	0.0382884	12.2682	-0.147366	0	0.997299	12.6705	-0.150209	0	0.997662	Yes	Yes	Yes	Yes	10	10	0.99202	0.929172	0.772212	0.539856	0.326123	0.239586	0.157743	0.107815	0.99202	0.930841	0.708205	0.557597	0.357447	0.22296	0.169069	0.114729
O43823	AKAP8	12	12	1	0.987993	1.0451	0.963028	0.590288	0.349972	0.229093	0.109286	1	1.00019	1.02668	0.959996	0.562522	0.320724	0.153926	0.102377	13.067	-0.120655	0.0503665	0.993919	12.7135	-0.134644	0.0438321	0.996927	Yes	Yes	Yes	Yes	17	17	0.99202	0.941034	0.898016	0.816404	0.704846	0.632652	0.571754	0.515116	0.99202	0.960922	0.90673	0.788657	0.679516	0.606133	0.491975	0.423665
O43824	GTPBP6	6	6	1	1.14674	1.03332	0.933682	0.523613	0.334503	0.180314	0.155097	1	1.04346	1.03023	0.886203	0.538575	0.283332	0.144335	0.0960074	12.4297	-0.135161	0.11352	0.977975	12.3662	-0.125433	0	0.99737	Yes	Yes	Yes	Yes	9	9	0.99202	0.880649	0.738037	0.450754	0.272959	0.184928	0.106178	0.0761464	0.99202	0.910772	0.722171	0.451536	0.249671	0.153938	0.110475	0.0754609
O43826-2	SLC37A4	5	5	1	0.97928	0.992121	0.892118	0.598282	0.323183	0.199312	0.138853	1	1.0538	1.04368	0.972563	0.617388	0.317833	0.180569	0.118038	12.8691	-0.113208	0.021794	0.999352	12.9854	-0.13915	0.0735544	0.995129	Yes	Yes	Yes	Yes	5	5	0.99202	0.900866	0.810202	0.632947	0.46074	0.332065	0.249099	0.169706	0.99202	0.890433	0.765242	0.660972	0.404428	0.277296	0.221788	0.164882
O43837	IDH3B	28	28	1	1.02351	0.993303	0.885088	0.589288	0.390836	0.341554	0.182081	1	0.992792	0.989773	0.895592	0.616989	0.391973	0.259944	0.181116	13.3949	-0.0906686	0.0511167	0.992743	13.4021	-0.096612	0.0214065	0.999821	Yes	Yes	Yes	Yes	33	33	0.99202	0.86245	0.712923	0.528001	0.392978	0.277907	0.184891	0.081599	0.99202	0.885882	0.697798	0.553025	0.396382	0.2773	0.180196	0.0900898
O43847-2	NRD1	43	43	1	1.03708	1.01327	1.00671	0.84435	0.710018	0.282504	0.0624373	1	1.00453	0.991977	0.970756	0.829234	0.664881	0.243849	0.0676635	16.1737	-0.150462	0	0.981042	15.7787	-0.141696	0	0.982156	Yes	Yes	Yes	Yes	43	43	0.99202	0.964282	0.94298	0.861607	0.738504	0.478216	0.296363	0.171352	0.99202	0.978011	0.984651	0.868096	0.790048	0.490636	0.303432	0.165643
O43852-3	CALU	36	36	1	0.99139	1.02478	0.971364	0.710747	0.586553	0.514956	0.396628	1	0.999972	1.02113	0.954191	0.710182	0.541989	0.466851	0.337875	17.0988	-0.0709332	0.333353	0.987035	15.9371	-0.0737197	0.22269	0.992795	Yes	Yes		Yes	44	44	0.99202	0.968231	0.930389	0.902815	0.843567	0.786264	0.770236	0.804617	0.99202	0.924927	0.97074	0.855038	0.901723	0.831449	0.745952	0.721423
O43852-4	CALU	2	2	1	0.938658	0.864415	0.890416	0.746215	0.750496	0.700415	0.65314	1	0.926596	0.916406	0.903087	0.817462	0.709819	0.679448	0.614309		-0.0311411	0.0879397	0.904882		-0.0301962	0	0.932598	Yes	Yes			3	3	0.99202	0.970005	0.964892	0.903355	0.834575	0.723985	0.752855	0.808295	0.99202	0.923487	0.980662	0.82446	0.971961	0.886474	0.801931	0.737184
O43861	ATP9B	2	2	1	1.1364	1.09185	0.911768	0.531255	0.203054	0.0690656	0.0151937	1	0.978765	0.980398	0.905576	0.512998	0.171213	0.056854	0.0483747	12.1572	-0.165325	0	0.981863	11.9956	-0.168712	0	0.998576	Yes	Yes	Yes	Yes	2	2	0.99202	0.83173	0.806211	0.490015	0.30728	0.233879	0.0912079	0.0541675	0.99202	0.836148	0.590634	0.530409	0.246138	0.162345	0.0822168	0.0670074
O43865	AHCYL1	13	13	1	1.03106	1.05414	1.02687	0.80468	0.61733	0.267485	0.0399593	1	1.01742	1.05197	1.00176	0.792612	0.625697	0.285134	0.059714	15.4609	-0.130596	0	0.977728	15.5028	-0.121829	0	0.97747	Yes	Yes	Yes	Yes	11	11	0.99202	0.946649	0.789434	0.508692	0.31567	0.180702	0.104647	0.0455715	0.99202	0.937741	0.748847	0.508088	0.266996	0.160774	0.106985	0.0619552
O43896	KIF1C	19	19	1	1.02928	1.02872	0.945141	0.611774	0.2651	0.0941964	0.0479	1	1.03376	1.04809	0.974778	0.651687	0.326554	0.114081	0.066345	12.7602	-0.152777	0	0.998353	13.1883	-0.142555	0	0.996131	Yes	Yes	Yes	Yes	12	12	0.99202	0.833261	0.654691	0.394445	0.248439	0.164594	0.10034	0.0696254	0.99202	0.843071	0.611336	0.436503	0.239559	0.163935	0.121994	0.0773195
O43909	EXTL3	3	3	1	0.948957	0.9618	0.867375	0.554694	0.302883	0.168094	0.0387421	1	1.06313	1.03166	0.957659	0.606085	0.315964	0.143441	0.0669507	12.4293	-0.12397	0	0.992215	12.9477	-0.134045	0	0.995046	Yes	Yes	Yes	Yes	3	3	0.99202	0.820579	0.818844	0.600708	0.410907	0.287539	0.222907	0.121707	0.99202	0.975832	0.775098	0.62965	0.437368	0.313904	0.248322	0.134774
O43913	ORC5	12	12	1	0.96709	0.946215	0.787303	0.375518	0.110011	0.0492498	0.0227184	1	1.03585	0.994515	0.852638	0.398935	0.125488	0.0552831	0.0264398	10.8677	-0.169218	0	0.995752	11.2476	-0.175511	0	0.998806	Yes	Yes	Yes	Yes	12	12	0.99202	0.826443	0.625754	0.399167	0.235409	0.145389	0.0934112	0.0580331	0.99202	0.869319	0.607352	0.416657	0.213631	0.149529	0.103318	0.0722645
O43920	NDUFS5	7	7	1	0.989073	0.978284	0.952676	0.613016	0.360387	0.182661	0.117667	1	0.998544	1.03568	0.963742	0.61694	0.353523	0.172911	0.0962615	13.1858	-0.11847	0.0124526	0.998105	13.1923	-0.122569	0	0.997203	Yes	Yes	Yes	Yes	7	7	0.99202	0.941968	0.887129	0.735736	0.577421	0.446646	0.316122	0.207452	0.99202	0.951587	0.888321	0.730375	0.625901	0.463671	0.315154	0.224273
O43924	PDE6D	4	4	1	1.05358	1.08922	1.02648	0.888106	1.00964	1.09827	1.02297	1	1.04733	1.002	1.02349	0.844181	0.850123	0.863217	0.847635		0.132158	1.06062	0.100728		-0.123383	0.850019	0.946652	Yes	Yes			2	2	0.99202	0.914652	0.909469	0.861688	0.858288	0.703654	0.499567	0.155704	0.99202	1.03425	0.939543	0.9494	0.955307	0.754603	0.46291	0.18134
O43929	ORC4	15	15	1	1.02562	1.00357	0.88901	0.481974	0.179425	0.0749354	0.0553919	1	1.05083	1.0318	0.928927	0.500628	0.187197	0.0900132	0.0620602	11.8161	-0.158852	0	0.999217	11.9982	-0.171911	0.0302072	0.997383	Yes	Yes	Yes	Yes	9	9	0.99202	0.831126	0.618964	0.40217	0.24368	0.146358	0.0945871	0.0639479	0.99202	0.862299	0.557481	0.383115	0.203289	0.160605	0.104636	0.0679206
O43933	PEX1	8	8	1	0.983307	0.98574	0.923859	0.538878	0.220152	0.0857744	0.0248575	1	1.00638	0.972474	0.845006	0.457337	0.19941	0.0858134	0.0378014	12.2548	-0.158869	0	0.999128	11.5848	-0.14845	0	0.998858	Yes	Yes	Yes	Yes	7	7	0.99202	0.818763	0.653697	0.384422	0.236507	0.159187	0.119914	0.0724927	0.99202	0.855192	0.573146	0.406385	0.233443	0.148828	0.10388	0.0762636
O60216	RAD21	23	23	1	0.979143	0.979589	0.920218	0.560588	0.221865	0.0739955	0.0613198	1	1.01495	1.00431	0.953613	0.571361	0.219172	0.0826921	0.0604899	12.3548	-0.156175	0	0.998635	12.4483	-0.16762	0.0176215	0.999676	Yes	Yes	Yes	Yes	20	20	0.99202	0.900637	0.88636	0.79117	0.614497	0.455081	0.317877	0.185602	0.99202	0.950779	0.91416	0.814131	0.672359	0.444523	0.313101	0.190854
O60220	TIMM8A	6	6	1	0.990821	1.01601	1.07434	0.758643	0.863773	1.06363	0.957208	1	1.05537	1.13406	1.02744	0.88786	0.901435	0.7756	0.824148		-0.0379841	0.913473	0.242441		-0.0289844	0.794293	0.731485	Yes	Yes			7	7	0.99202	0.862523	1.16737	1.35256	1.39688	1.15459	1.01274	0.634457	0.99202	0.995206	0.998121	0.908092	0.903505	0.796404	0.675858	0.660896
O60229	KALRN	2	2	1	1.02508	0.992928	0.925923	0.709795	0.373772	0.179031	0.0357876	1	0.941238	0.98754	1.03565	0.827714	0.440852	0.0951303	0.144779	13.6393	-0.132134	0	0.994845	14.3238	-0.164248	0.0572989	0.986809	Yes	Yes	Yes	Yes
O60231	DHX16	26	26	1	1.00787	0.960262	0.938492	0.664588	0.323121	0.136299	0.108429	1	1.00915	1.04117	0.997163	0.687459	0.332702	0.15646	0.101075	13.2182	-0.133788	0.0137293	0.99756	13.3938	-0.145144	0.0467208	0.997798	Yes	Yes	Yes	Yes	23	23	0.99202	0.95934	0.854865	0.562507	0.329225	0.182178	0.13827	0.092639	0.99202	0.989901	0.891517	0.569645	0.294649	0.188743	0.14041	0.104058
O60232	SSSCA1	10	10	1	1.04281	1.11011	1.04238	0.773414	0.741947	0.806937	0.625694	1	1.05349	1.09364	1.12047	0.833166	0.688285	0.680418	0.587316		-0.208409	0.724816	0.851289		-0.0934723	0.634309	0.89914	Yes	Yes			15	15	0.99202	0.899309	1.07843	1.08485	1.07409	0.931876	0.897306	0.833532	0.99202	0.98359	0.95829	0.904442	0.957719	0.798422	0.725935	0.658226
O60234	GMFG	1	1	1	1.06829	1.21117	1.21044	0.847205	0.948068	0.9705	0.848571	1	0.98417	1.22243	1.11169	0.937339	0.914287	1.02027	0.850206		-0.0358229	0.904635	0.226473		0	0	0.231321	Yes	Yes			2	2	0.99202	0.916708	0.891237	0.909334	0.829232	0.841109	0.844625	0.761258	0.99202	0.86047	0.955038	0.844717	1.01629	1.10389	0.970923	0.800589
O60239	SH3BP5	1	1	1	0.97864	1.00638	0.916146	0.822996	0.846826	0.838157	0.665161	1	0.998077	1.01734	0.96684	0.700804	0.58501	0.585527	0.400559		-0.0208512	0	0.853928	18.1793	-0.0674256	0.375148	0.966419	Yes	Yes			3	3	0.99202	0.955903	1.01885	0.851737	0.844528	0.739476	0.631615	0.56322	0.99202	0.946663	0.915138	0.89747	0.859495	0.758538	0.588989	0.454027
O60243	HS6ST1	1	1	1	1.06786	1.0024	1.04858	0.614513	0.329552	0.163458	0.0198407	1	1.06249	1.06631	0.951511	0.616963	0.29285	0.159521	0.0353982	13.1467	-0.142634	0	0.985762	12.9276	-0.13901	0	0.991915	Yes	Yes	Yes	Yes
O60244	MED14	20	20	1	1.01931	0.960668	0.871828	0.489424	0.192831	0.0964175	0.0639424	1	1.00745	1.0079	0.905659	0.513248	0.219189	0.0947097	0.0695537	11.8243	-0.147846	0	0.998225	12.0838	-0.150473	0.00882441	0.999747	Yes	Yes	Yes	Yes	21	21	0.99202	0.969101	0.87837	0.600534	0.318229	0.165895	0.108416	0.0587114	0.99202	0.977925	0.858046	0.657488	0.306819	0.178833	0.120002	0.0764716
O60256	PRPSAP2	21	21	1	1.24267	1.31696	1.21525	0.939648	0.960674	1.15278	0.874502	1	0.996824	1.06913	1.08122	0.862297	0.772255	0.724218	0.656066		0	0.00602187	-0.243982		-0.0527672	0.664354	0.919287	Yes	Yes			14	14	0.99202	0.971583	0.962022	0.979866	0.881057	0.655668	0.33747	0.179051	0.99202	1.02189	0.958634	0.95283	0.9807	0.711898	0.385813	0.201768
O60264	SMARCA5	30	30	1	0.972154	0.960255	0.807971	0.396775	0.146324	0.0811674	0.050371	1	1.02608	0.982028	0.819569	0.40206	0.161297	0.0875971	0.0593719	11.098	-0.155902	0	0.998062	11.1898	-0.154151	0.00471477	0.99922	Yes	Yes	Yes	Yes	22	22	0.99202	0.777996	0.603909	0.375673	0.222572	0.1344	0.09173	0.0566203	0.99202	0.845654	0.533386	0.41031	0.197865	0.136626	0.102029	0.0727086
O60266	ADCY3	11	11	1	0.932581	1.00512	0.943773	0.619058	0.44758	0.359169	0.330621	1	1.0264	1.11143	1.02651	0.713925	0.499469	0.415839	0.337084	13.5893	-0.113842	0.30957	0.991588	14.7011	-0.110778	0.337014	0.97415	Yes	Yes			5	5	0.99202	0.889245	0.850174	0.680942	0.553907	0.425419	0.287333	0.211263	0.99202	0.916515	0.884541	0.711176	0.563415	0.416076	0.325832	0.242357
O60271	SPAG9	48	48	1	0.979175	0.988222	1.0063	0.798816	0.894428	0.95525	0.688559	1	0.998294	1.01888	1.00411	0.86838	0.879094	0.899425	0.645643		-0.0166925	0	0.525763		-0.0299711	0	0.794387	Yes	Yes
O60282	KIF5C	5	5	1	1.04807	0.971379	1.07346	0.801747	0.556879	0.320646	0.11141	1	1.12165	1.14989	1.09558	0.956199	0.752826	0.311576	0.163321	15.3604	-0.11048	0	0.982239	16.5343	-0.165117	0.0998905	0.953661	Yes	Yes	Yes	Yes	6	6	0.99202	0.950419	0.823504	0.709591	0.482534	0.302385	0.19541	0.118859	0.99202	0.910289	0.853264	0.716907	0.519493	0.338842	0.230983	0.121355
O60287	URB1	15	15	1	1.02675	1.01715	0.774695	0.323755	0.144815	0.101418	0.0901813	1	1.02895	0.972955	0.767973	0.320427	0.146402	0.114894	0.09359	10.6083	-0.178756	0.0638257	0.999049	10.5603	-0.177312	0.0704557	0.998831	Yes	Yes	Yes	Yes	1	1	0.99202	0.783473	0.786811	0.491568	0.201704	0.131186	0.201058	0.0806649	0.99202	0.934478	0.516721	0.558875	0.230833	0.188815	0.119158	0.133846
O60291-2	MGRN1	8	8	1	0.976272	0.969787	0.977084	0.64648	0.55291	0.486512	0.39832	1	0.940528	0.996124	1.01434	0.934369	0.74099	0.64346	0.497175	15.497	-0.0994868	0.422085	0.982752		-0.056804	0.308703	0.977351	Yes	Yes			8	8	0.99202	0.973521	0.849085	0.891999	0.663943	0.572963	0.521826	0.441437	0.99202	0.89396	0.850528	0.890832	0.98336	0.842848	0.728643	0.585355
O60292	SIPA1L3	1	1	1	1.03958	0.989351	0.880851	0.522077	0.363821	0.246633	0.120977	1	0.990679	1.03054	1.02406	0.755264	0.4484	0.192711	0.138589	12.6847	-0.102588	0	0.993638	14.2898	-0.125011	0.0305391	0.995416	Yes	Yes	Yes	Yes
O60293	ZFC3H1	9	9	1	0.990822	0.950154	0.740375	0.316322	0.161352	0.132326	0.10743	1	0.95419	0.90046	0.75389	0.313183	0.154476	0.127877	0.0808693	10.4352	-0.170514	0.0832114	0.998231	10.4998	-0.166532	0.0590239	0.990147	Yes	Yes	Yes	Yes	2	2	0.99202	0.934159	0.957397	0.593385	0.383411	0.195488	0.127464	0.115143	0.99202	1.14655	0.751222	0.608199	0.29128	0.252157	0.146317	0.127268
O60294	LCMT2	1	1	1	0.899912	0.982921	0.898463	0.544875	0.311855	0.149937	0.105451	1	0.949981	0.915717	0.866193	0.510632	0.299597	0.182785	0.0828397	12.5178	-0.121091	0	0.989156	12.2188	-0.117216	0	0.989765	Yes	Yes	Yes	Yes	3	3	0.99202	0.777623	0.580853	0.446593	0.360236	0.312995	0.290771	0.175607	0.99202	1.00087	0.697025	0.600257	0.401705	0.289078	0.279537	0.147046
O60303	KIAA0556	3	3	1	1.11776	1.05482	0.969286	0.543089	0.284387	0.160304	0.0734419	1	0.888518	0.780734	0.747409	0.406217	0.204	0.0998637	0.0531192	12.5112	-0.146255	0.0497687	0.984593	10.794	-0.129182	0	0.944691	Yes	Yes	Yes	Yes	1	1	0.99202	0.954225	0.897126	0.938086	0.634158	0.475712	0.422505	0.378499	0.99202	0.968038	1.02267	0.876806	0.589521	0.408655	0.454709	0.299755
O60306	AQR	20	20	1	0.988807	0.990581	0.921875	0.553732	0.300574	0.147878	0.0695621	1	0.993973	0.9785	0.945457	0.614789	0.313849	0.153977	0.0818631	12.5738	-0.129395	0	0.998851	12.981	-0.12991	0	0.999368	Yes	Yes	Yes	Yes	18	18	0.99202	0.845174	0.669296	0.449747	0.284316	0.20191	0.147945	0.0884498	0.99202	0.846838	0.593229	0.439968	0.249823	0.169421	0.122152	0.07378
O60307	MAST3	1	1	1	1.14303	1.02837	0.792921	0.261809	0.143052	0.0276427	0.103817	1	1.18986	1.23369	1.05928	0.588779	0.233636	0.170402	0.136247	10.4284	-0.213565	0.0626263	0.98327	12.4339	-0.235295	0.153392	0.938787	Yes	Yes	Yes	Yes	1	1	0.99202	0.676091	0.479484	0.410168	0.281389	0.141141	0.0923002	0.12659	0.99202	0.813234	0.563702	0.526763	0.3551	0.245148	0.337109	0.174947
O60313-2	OPA1	50	50	1	1.02915	1.01305	0.89335	0.498466	0.184396	0.0770571	0.0575185	1	0.988273	1.01657	0.901219	0.506439	0.191273	0.0847938	0.0631219	11.9166	-0.157788	0	0.99883	11.9848	-0.157795	0.00728796	0.999355	Yes	Yes	Yes	Yes	40	40	0.99202	0.865634	0.704577	0.456101	0.283006	0.173229	0.120389	0.0643688	0.99202	0.872358	0.637891	0.470116	0.266352	0.176615	0.120112	0.075098
O60318	MCM3AP	8	8	1	0.979618	1.03982	0.940163	0.511387	0.354126	0.304046	0.209126	1	1.00049	1.01592	0.936631	0.584032	0.319764	0.278768	0.248518	12.2896	-0.147761	0.238308	0.992405	12.6348	-0.147367	0.2315	0.999192	Yes	Yes	Yes	Yes	7	7	0.99202	0.898357	0.769112	0.499582	0.331702	0.231056	0.164244	0.113248	0.99202	0.899798	0.61073	0.537567	0.338936	0.242615	0.141118	0.106348
O60331-3	PIP5K1C	2	2	1	1.12965	0.976753	1.09562	0.635044	0.357184	0.197832	0.112868	1	0.968717	1.07626	0.979295	0.639305	0.355239	0.211638	0.119991	13.2576	-0.148523	0.102543	0.970034	13.3164	-0.125989	0.057839	0.991927	Yes	Yes	Yes	Yes	2	2	0.99202	0.949661	0.857774	0.621626	0.433188	0.312847	0.215119	0.155195	0.99202	0.851155	0.6577	0.520377	0.439539	0.287435	0.19276	0.111165
O60333-3	KIF1B	3	3	1	1.06185	0.916519	0.873661	0.494572	0.258679	0.177918	0.0845213	1	0.999518	1.20327	0.978915	0.600607	0.375657	0.22972	0.107129	12.041	-0.125591	0.0126673	0.989875	13.2713	-0.117989	0.0378221	0.960202	Yes	Yes	Yes	Yes
O60333-4	KIF1B	40	40	1	1.00116	1.02396	0.97892	0.798466	0.751455	0.514374	0.0899135	1	1.04138	1.04254	0.991374	0.789095	0.672984	0.452414	0.110174	17.1592	-0.113945	0	0.932141	16.3694	-0.0972361	0	0.957139	Yes	Yes	Yes	Yes
O60336	MAPKBP1	3	3	1	1.03523	0.969344	0.802953	0.49136	0.285208	0.140511	0.122496	1	0.95753	0.912738	0.739187	0.473049	0.247329	0.154076	0.0971411	11.8185	-0.115313	0	0.997417	11.2817	-0.114722	0	0.991645	Yes	Yes	Yes	Yes	2	2	0.99202	0.853042	0.698804	0.485082	0.25374	0.147767	0.0628492	0.0426792	0.99202	0.933242	0.705526	0.48104	0.195573	0.130718	0.0933688	0.0686829
O60337	2021-03-06	4	4	1	0.933753	1.09686	1.05308	0.723042	0.644235	0.428276	0.190649	1	1.07387	1.07015	1.01965	0.752852	0.53516	0.3583	0.170724	16.1052	-0.0827268	0	0.944222	15.2735	-0.092855	0	0.980095	Yes	Yes	Yes	Yes	1	1	0.99202	0.973884	0.807313	0.849625	0.599194	0.393411	0.293169	0.187917	0.99202	0.873169	0.869423	0.806165	0.578944	0.394155	0.242849	0.192224
O60341-2	KDM1A	27	27	1	1.04025	1.04281	0.989736	0.735444	0.452593	0.205521	0.0752194	1	0.997104	1.02648	0.976812	0.708997	0.449485	0.207146	0.0827069	14.2099	-0.123182	0	0.993502	14.0698	-0.11861	0	0.995326	Yes	Yes	Yes	Yes	22	22	0.99202	0.92335	0.777718	0.548233	0.340573	0.19684	0.127579	0.0646255	0.99202	0.937046	0.765945	0.557801	0.336442	0.198098	0.131056	0.0817319
O60343	TBC1D4	32	32	1	1.01126	1.029	1.01759	0.672701	0.336509	0.140568	0.0744193	1	0.997806	1.04592	1.00389	0.690602	0.340436	0.145761	0.0836673	13.3828	-0.142745	0.0100671	0.996695	13.4657	-0.142284	0.0169211	0.99707	Yes	Yes	Yes	Yes	44	44	0.99202	0.975486	0.954281	0.823426	0.649296	0.458675	0.294689	0.185715	0.99202	0.966562	0.93298	0.787498	0.656506	0.41326	0.264986	0.162057
O60344	ECE2	7	7	1	1.02981	1.00512	0.970051	0.760654	0.603252	0.281848	0.124848	1	0.992188	1.12936	1.09929	0.841708	0.650359	0.329365	0.098899	15.2659	-0.104637	0	0.984174	15.9952	-0.121545	0	0.96278	Yes	Yes	Yes	Yes	5	5	0.99202	0.941283	0.734995	0.455973	0.245328	0.144026	0.0881095	0.0568788	0.99202	0.870458	0.728561	0.526653	0.284393	0.198079	0.139727	0.0755887
O60346	PHLPP1	4	4	1	1.13933	1.21332	1.0821	0.858674	0.54552	0.224629	0.106865	1	1.0623	1.1504	0.961541	0.745777	0.443525	0.216948	0.0651894	15.2188	-0.133734	0	0.942374	14.2086	-0.123298	0	0.974792	Yes	Yes	Yes	Yes	6	6	0.99202	0.929232	0.908018	0.785043	0.595263	0.380033	0.258853	0.171554	0.99202	0.977905	0.839376	0.772247	0.570839	0.346865	0.242307	0.145907
O60353	FZD6	14	14	1	0.952619	1.01468	0.941098	0.654149	0.429098	0.257889	0.142847	1	1.04053	1.06497	1.00156	0.712255	0.445533	0.252216	0.142977	13.8376	-0.100667	0	0.995417	14.2606	-0.108125	0.00760504	0.991593	Yes	Yes	Yes	Yes	11	11	0.99202	0.988002	0.878894	0.714465	0.566732	0.412225	0.322091	0.244273	0.99202	0.913953	0.844781	0.725653	0.587739	0.426785	0.326047	0.241441
O60427	FADS1	10	10	1	1.09174	1.13521	1.05643	0.640944	0.307457	0.183041	0.155933	1	1.03531	1.05615	0.970136	0.575744	0.32076	0.197673	0.133682	12.9369	-0.177651	0.151554	0.974118	12.7462	-0.140739	0.107401	0.994261	Yes	Yes	Yes	Yes	6	6	0.99202	0.845937	0.685789	0.43252	0.265121	0.14913	0.0944285	0.0656345	0.99202	0.841774	0.596662	0.446946	0.229629	0.144005	0.104367	0.064539
O60437	PPL	15	15	1	1.00624	1.03216	0.998955	0.719693	0.558874	0.379303	0.184918	1	1.01901	1.05905	1.00217	0.747375	0.503456	0.325279	0.173802	15.3467	-0.0857118	0	0.986058	14.9662	-0.0954769	0	0.99189	Yes	Yes	Yes	Yes	20	20	0.99202	0.968617	0.945552	0.885631	0.737834	0.640348	0.585642	0.555808	0.99202	0.995381	1.01714	0.910399	0.837817	0.714828	0.61518	0.530599
O60443	DFNA5	4	4	1	0.906505	0.934231	0.952239	0.654684	0.444621	0.233557	0.0449639	1	0.967853	1.04893	1.06375	0.686413	0.463196	0.230926	0.0663255	13.7562	-0.11374	0	0.973306	14.1503	-0.119006	0	0.980174	Yes	Yes	Yes	Yes	13	13	0.99202	0.935789	0.930277	0.856276	0.723628	0.502335	0.279878	0.133593	0.99202	0.964575	0.948086	0.798851	0.730966	0.467464	0.238973	0.128438
O60447	EVI5	7	7	1	0.89225	0.85825	0.87346	0.512831	0.351371	0.273251	0.188315	1	1.09196	1.07173	1.00232	0.65869	0.414116	0.290201	0.192266	12.4811	-0.103761	0.0969428	0.956046	13.7237	-0.117427	0.153283	0.981827	Yes	Yes	Yes	Yes	7	7	0.99202	0.907868	0.796017	0.603271	0.411598	0.253957	0.182151	0.150999	0.99202	0.848996	0.63686	0.571641	0.375169	0.248891	0.182091	0.129863
O60476	MAN1A2	10	10	1	0.953666	0.989049	0.914455	0.546775	0.257553	0.0895421	0.0472854	1	0.999712	0.992511	0.927509	0.610619	0.258618	0.117766	0.0331265	12.3537	-0.146654	0	0.997224	12.7243	-0.149115	0	0.999027	Yes	Yes	Yes	Yes	12	12	0.99202	0.956038	0.943024	0.785314	0.639682	0.357466	0.196728	0.118502	0.99202	0.95849	0.961152	0.789668	0.669369	0.375604	0.211899	0.124735
O60487	MPZL2	3	3	1	1.34912	1.31492	1.31229	0.961308	1.04464	1.32454	1.07156	1	1.03721	1.19354	1.16636	0.949595	0.838849	0.788886	0.793955			1.39382	0.173959		-0.0500833	0.788332	0.618533	Yes	Yes			3	3	0.99202	0.979609	1.00282	0.89365	0.841471	0.782473	0.687563	0.638333	0.99202	0.891624	0.84269	0.866219	0.81288	0.810997	0.701657	0.552695
O60488	ACSL4	34	34	1	1.05498	1.0609	0.963713	0.625894	0.33088	0.144918	0.0660708	1	1.01898	1.0123	0.957003	0.626231	0.332511	0.154454	0.0753394	13.1019	-0.13375	0	0.993509	13.1143	-0.130168	0	0.998804	Yes	Yes	Yes	Yes	31	31	0.99202	0.824583	0.62965	0.390576	0.23373	0.145486	0.0961743	0.058704	0.99202	0.847929	0.563887	0.422704	0.22596	0.141962	0.101544	0.0659309
O60493	SNX3	11	11	1	1.07855	1.08986	1.15402	0.939558	0.825775	0.451723	0.103604	1	0.974662	1.00754	0.990763	0.840814	0.692074	0.419356	0.0936652	17.4345	-0.155496	0	0.953659	16.5079	-0.114631	0	0.972965	Yes	Yes	Yes	Yes	11	11	0.99202	0.965891	0.930035	0.81514	0.511092	0.298527	0.20759	0.165209	0.99202	0.919831	0.891913	0.922451	0.506562	0.307219	0.217642	0.16972
O60499	STX10	10	10	1	0.990759	1.00429	1.01648	0.787076	0.787445	0.738549	0.487201	1	1.01486	1.03544	0.995585	0.863698	0.73861	0.64037	0.435755		-0.0402108	0	0.900372	20.1597	-0.0529444	0	0.981777	Yes	Yes		Yes	8	8	0.99202	0.959282	0.960929	0.93126	0.837339	0.827848	0.710169	0.736778	0.99202	0.980647	1.04478	0.862521	0.984337	0.896422	0.793607	0.737116
O60502	MGEA5	46	46	1	1.03651	1.0137	0.954444	0.633938	0.319686	0.107593	0.0270879	1	1.0051	1.00213	0.920642	0.63199	0.312258	0.143462	0.0497738	13.0336	-0.146368	0	0.996349	12.9916	-0.134721	0	0.998514	Yes	Yes	Yes	Yes	42	42	0.99202	0.955679	0.885866	0.690976	0.509603	0.337051	0.227112	0.127574	0.99202	0.958165	0.899271	0.706093	0.487814	0.302843	0.200545	0.124379
O60503	ADCY9	1	1	1	0.985144	0.996329	0.935649	0.579834	0.284318	0.0911884	0.0229861	1	1.05432	1.06425	1.03559	0.701592	0.322019	0.0818319	0.0383656	12.624	-0.149264	0	0.99742	13.3932	-0.163687	0	0.991505	Yes	Yes	Yes	Yes	2	2	0.99202	0.852037	0.911037	0.693449	0.584698	0.479246	0.336942	0.244728	0.99202	1.00415	0.856138	0.679646	0.51758	0.357134	0.289538	0.18415
O60504	SORBS3	9	9	1	1.00936	1.05428	1.01475	0.828963	0.957997	1.0712	1.09518	1	1.00117	1.03918	1.01319	0.885637	0.844013	0.860254	0.904272		0	1.09518	0.29008		-0.367897	0.869513	0.913488	Yes	Yes			15	15	0.99202	0.915929	0.873947	0.889601	0.809258	0.684663	0.562001	0.385486	0.99202	0.923458	0.983589	0.888763	0.9137	0.784806	0.625982	0.381218
O60506-3	SYNCRIP	1	1	1	0.842457	0.805425	0.6851	0.606893	0.460316	0.177514	0.0265966	1	0.963448	1.02535	0.939681	0.775369	0.593718	0.286531	0.0431236	11.9521	-0.092991	0	0.856096	15.1978	-0.117114	0	0.973058	Yes	Yes	Yes	Yes	37	37	0.99202	1.03205	1.07128	0.895333	0.614064	0.304154	0.174189	0.0958699	0.99202	1.22208	0.99085	0.979379	0.612569	0.302209	0.181525	0.112105
O60506	SYNCRIP	59	59	1	1.02139	1.05025	0.987584	0.736624	0.606962	0.284826	0.0799538	1	1.0039	1.04818	0.964945	0.727289	0.55649	0.270781	0.0818185	15.1445	-0.108056	0	0.972949	14.7775	-0.107489	0	0.981459	Yes	Yes	Yes	Yes
O60507	TPST1	2	2	1	0.948724	0.937476	0.997368	0.631636	0.350514	0.199871	0.0802244	1	0.984851	1.0528	0.976024	0.681983	0.378382	0.189402	0.0985668	13.3275	-0.124835	0.00465378	0.989338	13.6422	-0.12254	0	0.996504	Yes	Yes	Yes	Yes	3	3	0.99202	0.716774	0.880081	0.791184	0.512681	0.415366	0.310481	0.245062	0.99202	0.915101	0.795139	0.781574	0.546628	0.414516	0.261754	0.206566
O60508	CDC40	11	11	1	0.999976	1.00627	0.91636	0.568895	0.319183	0.214056	0.165241	1	0.971575	0.962466	0.877144	0.544073	0.317445	0.161117	0.119119	12.6465	-0.127397	0.111929	0.999883	12.4808	-0.115421	0	0.99755	Yes	Yes	Yes	Yes	5	5	0.99202	0.871167	0.860918	0.717683	0.585453	0.357248	0.221681	0.147474	0.99202	0.941571	0.890488	0.789157	0.570897	0.353342	0.246653	0.137142
O60512	B4GALT3	3	3	1	0.967274	1.06583	0.963057	0.735613	0.678231	0.450503	0.0406791	1	1.06523	1.1141	1.05799	0.80285	0.640153	0.459407	0.0854746	16.0261	-0.0989931	0	0.919179	16.2416	-0.101617	0	0.940926	Yes	Yes	Yes	Yes	1	1	0.99202	1.14984	1.41483	1.41914	0.898995	0.236615	0.142172	0.0997352	0.99202	1.21408	1.21553	1.4088	1.00148	0.266877	0.132581	0.10524
O60513	B4GALT4	1	1	1	1.04793	1.27755	1.15042	0.701012	0.685571	0.290489	0	1	0.853239	0.935586	1.08412	0.783462	0.577577	0.291806	0	15.5291	-0.123075	0	0.873249	15.2066	-0.128265	0	0.938353	Yes	Yes	Yes	Yes	1	1	0.99202	1.02184	1.02456	0.679073	0.459909	0.130103	0.133697	0.157093	0.99202	0.717174	0.77889	0.777202	0.391763	0.251446	0	0.160122
O60518	RANBP6	11	11	1	0.997474	1.01782	1.03207	0.731859	0.49885	0.315632	0.199469	1	1.02606	1.04598	0.99826	0.714202	0.466018	0.24933	0.177971	14.8064	-0.0997273	0.0720615	0.992269	14.3346	-0.106955	0.0466602	0.994057	Yes	Yes	Yes	Yes	10	10	0.99202	0.924756	0.804849	0.599527	0.401322	0.255743	0.177563	0.104098	0.99202	0.958511	0.796933	0.612075	0.401422	0.235347	0.16085	0.102841
O60524	NEMF	35	35	1	0.997277	1.00304	0.926725	0.610998	0.368622	0.187151	0.0291841	1	1.04566	1.00692	0.933526	0.602254	0.341067	0.172002	0.044688	13.1133	-0.123431	0	0.992994	12.9825	-0.12683	0	0.994965	Yes	Yes	Yes	Yes	30	30	0.99202	0.852204	0.738324	0.521283	0.351669	0.224701	0.148928	0.0894116	0.99202	1.0159	0.650852	0.583683	0.318704	0.214354	0.151674	0.0997306
O60547	GMDS	1	1	1	1.13046	1.04369	0.93595	0.685223	0.160844	0.0893493	0	1	0.939448	1.11101	0.530863	0.491424	0.282178	0.138512	0	12.8308	-0.213265	0.00723248	0.984522	10.5118	-0.119443	0	0.937787	Yes	Yes	Yes	Yes
O60551	NMT2	6	6	1	1.01901	1.03845	0.992107	0.674828	0.343026	0.086246	0.0290055	1	0.997825	0.992692	0.944751	0.693403	0.347917	0.124018	0.0347376	13.3161	-0.153807	0	0.994942	13.4216	-0.144289	0	0.997441	Yes	Yes	Yes	Yes	8	8	0.99202	1.04236	0.93957	0.880564	0.596038	0.34145	0.222719	0.147638	0.99202	0.957941	0.928485	0.838766	0.555472	0.319466	0.212444	0.137025
O60563	CCNT1	13	13	1	0.981841	0.945247	0.841921	0.517641	0.206331	0.0574879	0.0273044	1	0.993252	0.999435	0.875391	0.511311	0.215297	0.0811777	0.0347094	11.8637	-0.150496	0	0.992847	11.9776	-0.150525	0	0.998777	Yes	Yes	Yes	Yes	14	14	0.99202	0.937232	0.794867	0.588322	0.341162	0.191106	0.136517	0.099496	0.99202	0.939088	0.813395	0.630495	0.370314	0.213136	0.150755	0.0973164
O60566-3	BUB1B	34	34	1	1.03648	1.01926	0.946401	0.607695	0.324372	0.200637	0.13443	1	1.00683	1.05023	0.967302	0.611815	0.318149	0.194939	0.123237	12.9523	-0.12967	0.0781061	0.998129	12.9577	-0.137302	0.0831263	0.996871	Yes	Yes	Yes	Yes	24	24	0.99202	0.957862	0.843503	0.68773	0.501102	0.334054	0.235899	0.162966	0.99202	0.943872	0.879773	0.698455	0.511062	0.339314	0.233125	0.158112
O60568	PLOD3	22	22	1	0.966023	1.01906	1.01151	0.749099	0.650013	0.426369	0.0602498	1	1.01527	1.09058	1.06857	0.890989	0.710387	0.495455	0.0782149	15.8909	-0.100137	0	0.944189	17.0047	-0.121732	0	0.953059	Yes	Yes	Yes	Yes	29	29	0.99202	0.984224	0.893369	0.783168	0.499211	0.25315	0.153287	0.088162	0.99202	0.985371	0.907877	0.78842	0.541679	0.269831	0.177211	0.113028
O60573	EIF4E2	8	8	1	1.02447	1.10981	0.992308	0.659286	0.441981	0.252023	0.122646	1	1.04315	1.11698	1.01243	0.683038	0.432121	0.269261	0.10298	13.9738	-0.106306	0	0.982325	14.0861	-0.109597	0	0.978689	Yes	Yes	Yes	Yes	12	12	0.99202	0.850546	0.906626	0.809705	0.654244	0.362482	0.20324	0.124839	0.99202	0.941949	0.936486	0.794481	0.691348	0.383137	0.209899	0.124543
O60583	CCNT2	6	6	1	0.949967	0.969197	0.861907	0.454476	0.190802	0.0704675	0.0304094	1	1.00443	0.927418	0.823552	0.437988	0.181229	0.0687563	0.0420435	11.6114	-0.156027	0	0.996709	11.369	-0.150724	0	0.995263	Yes	Yes	Yes	Yes	3	3	0.99202	1.03712	0.886608	0.662975	0.397487	0.27345	0.212435	0.124112	0.99202	0.94807	0.934702	0.633228	0.440762	0.282808	0.232824	0.135577
O60610	DIAPH1	64	64	1	1.01251	1.02618	0.989635	0.703215	0.326149	0.0952876	0.0599045	1	1.01064	1.03256	0.98206	0.710527	0.340663	0.118327	0.0545257	13.4113	-0.154534	0	0.998267	13.5115	-0.148848	0	0.998421	Yes	Yes	Yes	Yes	81	81	0.99202	0.986681	0.894786	0.741355	0.523289	0.357547	0.245953	0.154349	0.99202	0.952731	0.899602	0.745289	0.544872	0.367956	0.254763	0.152314
O60613	2021-09-15	7	7	1	1.07777	1.0674	1.00408	0.888456	0.659807	0.322505	0.153216	1	0.973632	1.02585	0.970748	0.901102	0.618786	0.302739	0.159665	16.1907	-0.118575	0	0.986088	15.9528	-0.118077	0	0.997326	Yes	Yes	Yes	Yes	6	6	0.99202	0.961794	0.897172	0.822309	0.671396	0.492951	0.433662	0.441417	0.99202	0.956402	0.928583	0.843292	0.768041	0.549468	0.467213	0.47142
O60637	TSPAN3	1	1	1	0.893411	0.968909	0.907346	0.756466	0.873809	1.01098	1.0677	1	0.875044	1.0118	1.03453	0.903075	0.87841	1.00617	1.00955		-0.194556	0.923261	-0.0533561		-0.0206826	0.95018	-0.0118984	Yes	Yes			1	1	0.99202	1.11139	1.06466	1.00154	0.97843	0.975967	1.082	0.916679	0.99202	0.919747	0.993828	0.985872	0.994388	0.882071	1.03646	0.786943
O60645	EXOC3	22	22	1	1.04512	1.02952	0.874859	0.422576	0.156574	0.105057	0.0680492	1	1.00279	1.01549	0.893062	0.436745	0.14673	0.0900409	0.0712375	11.4307	-0.171968	0.0417198	0.997597	11.5383	-0.179633	0.0402467	0.999462	Yes	Yes	Yes	Yes	15	15	0.99202	0.763458	0.539454	0.312755	0.172566	0.100872	0.0598477	0.0374005	0.99202	0.785085	0.462856	0.327257	0.159977	0.100473	0.0766465	0.043879
O60658	PDE8A	3	3	1	1.13818	1.08489	0.938449	0.739561	0.445471	0.256822	0.157176	1	1.11125	1.0982	1.04009	0.640086	0.377417	0.293782	0.244135	14.3471	-0.103604	0	0.974264	13.1098	-0.161592	0.258446	0.973086	Yes	Yes	Yes	Yes	4	4	0.99202	0.918214	0.843296	0.662303	0.52752	0.316414	0.205671	0.131392	0.99202	0.868197	0.814547	0.636235	0.535516	0.274616	0.232341	0.131643
O60664-2	PLIN3	1	1	1	0.614964	0.959273	0.993769	0.509073	0.572836	0.386388	0.129979	1	1.08031	1.28153	1.39141	1.4618	1.43499	1.85018	0.517113	14.2444	-0.0822336	0	0.696294		0.224349	1.32442	0.113213	Yes	Yes
O60664	PLIN3	37	37	1	0.976719	1.05912	1.08639	0.940351	1.0945	0.907001	0.229192	1	1.09168	1.07801	1.10004	0.992551	1.0387	0.897938	0.255165	18.5142	-0.960377	0.229183	0.957492	18.5013	-0.937963	0.255159	0.952976	Yes	Yes	Yes	Yes	53	53	0.99202	0.962944	0.930925	0.919317	0.910636	0.836182	0.794642	0.778401	0.99202	0.969889	1.00849	0.907469	0.9425	0.887538	0.795789	0.725429
O60669	SLC16A7	3	3	1	0.965462	1.06341	1.08193	0.596787	0.308487	0.114225	0.0225143	1	1.1087	1.11761	1.1623	0.741131	0.295792	0.126422	0.0557109	12.9672	-0.155803	0	0.982388	13.468	-0.183526	0.0458606	0.964221	Yes	Yes	Yes	Yes	1	1	0.99202	0.878203	0.74698	0.512771	0.297625	0.237521	0.228384	0.140223	0.99202	0.825556	0.601218	0.422509	0.341533	0.119045	0.123081	0.161322
O60671	RAD1	5	5	1	0.931327	1.00687	0.950428	0.771891	0.661783	0.565728	0.315848	1	0.999581	1.0302	1.0361	0.753061	0.60502	0.49961	0.322797	17.8202	-0.059558	0	0.95905	16.9129	-0.0686581	0.101696	0.976043	Yes	Yes	Yes	Yes	9	9	0.99202	0.972221	0.915702	0.881959	0.866949	0.705505	0.529017	0.320518	0.99202	0.976985	0.988831	0.870724	0.836631	0.662078	0.45607	0.262799
O60674	JAK2	2	2	1	0.956226	1.02963	0.985417	0.600808	0.501986	0.365442	0.292383	1	1.04904	1.09605	0.881437	0.671153	0.572489	0.341361	0.217677	13.9045	-0.105665	0.283282	0.98045	14.9092	-0.077467	0	0.970564	Yes	Yes	Yes	Yes
O60678	PRMT3	9	9	1	1.01244	1.00577	0.906004	0.485469	0.160691	0.0348742	0.0216587	1	0.991322	0.961757	0.83901	0.468709	0.145388	0.0409556	0.0164928	11.8517	-0.179594	0	0.998975	11.5236	-0.166017	0	0.995352	Yes	Yes	Yes	Yes	16	16	0.99202	0.963962	0.882095	0.673038	0.341995	0.144849	0.0871117	0.0445098	0.99202	0.950391	0.917421	0.689649	0.342482	0.138027	0.0931053	0.0563154
O60684	KPNA6	12	12	1	0.958313	1.02353	0.904965	0.543662	0.27283	0.109626	0.0428572	1	0.972124	0.986384	0.922382	0.600905	0.284218	0.12047	0.0535665	12.3648	-0.140246	0	0.996799	12.7356	-0.13995	0	0.998541	Yes	Yes	Yes	Yes	13	13	0.99202	0.807786	0.562079	0.326432	0.194976	0.114863	0.063448	0.0346478	0.99202	0.847197	0.501548	0.347741	0.169269	0.105374	0.0712107	0.0465791
O60701	UGDH	37	37	1	1.0721	1.08111	1.00626	0.672653	0.433524	0.225897	0.0511235	1	0.971699	0.972246	0.9344	0.666774	0.425068	0.228236	0.0704656	13.8769	-0.119692	0	0.980986	13.723	-0.112581	0	0.992368	Yes	Yes	Yes	Yes	32	32	0.99202	0.89896	0.732299	0.491647	0.292097	0.163828	0.104124	0.0557062	0.99202	0.89116	0.647189	0.485322	0.307818	0.168933	0.111648	0.0670516
O60704	TPST2	2	2	1	0.952677	0.900845	0.859328	0.591851	0.349686	0.147244	0.0615552	1	0.988563	1.00367	1.03314	0.628168	0.395947	0.170628	0.0781962	12.7112	-0.118709	0	0.981895	13.4777	-0.125897	0	0.989653	Yes	Yes	Yes	Yes	3	3	0.99202	0.820688	0.805835	0.747534	0.423901	0.360502	0.265923	0.157732	0.99202	0.911029	0.858315	0.78068	0.557619	0.412835	0.297958	0.199924
O60716-3	CTNND1	43	43	1	0.963552	0.993547	0.834918	0.439891	0.127543	0.0457183	0.034327	1	0.886842	0.77542	0.80988	0.431163	0.125529	0.0453159	0.0306506	11.3552	-0.167917	0	0.996714	11.1691	-0.161081	0	0.942139	Yes	Yes	Yes	Yes	41	41	0.99202	0.844298	0.651914	0.418333	0.249774	0.165728	0.102045	0.0640708	0.99202	0.849415	0.60791	0.438243	0.228611	0.142401	0.1012	0.0622859
O60725	ICMT	3	3	1	1.09705	1.05531	0.942592	0.579337	0.233328	0.0981219	0.109822	1	0.924466	0.879885	0.822847	0.452636	0.182287	0.0810638	0.054237	12.4681	-0.167503	0.0600257	0.989789	11.4265	-0.145619	0	0.982096	Yes	Yes	Yes	Yes	2	2	0.99202	0.758596	0.557918	0.351494	0.182371	0.0994986	0.0684933	0.0255774	0.99202	0.813402	0.489973	0.406572	0.223354	0.132802	0.0918266	0.0538242
O60749	SNX2	28	28	1	1.03448	1.01583	0.975716	0.780427	0.483324	0.152392	0.0422289	1	0.996094	1.02752	0.977417	0.807499	0.505204	0.181159	0.0530836	14.4209	-0.140747	0	0.992113	14.6909	-0.138537	0	0.994287	Yes	Yes	Yes	Yes	25	25	0.99202	0.964734	0.820346	0.589973	0.41283	0.281696	0.181473	0.122969	0.99202	0.914356	0.74841	0.575106	0.39155	0.265764	0.186183	0.127928
O60762	DPM1	16	16	1	1.0191	0.979531	0.863631	0.435089	0.143183	0.0347712	0.018344	1	1.01343	0.991304	0.888021	0.44739	0.159626	0.0577578	0.029141	11.4591	-0.17486	0	0.998256	11.6195	-0.17075	0	0.99966	Yes	Yes	Yes	Yes	18	18	0.99202	0.83123	0.655837	0.447593	0.297534	0.201527	0.127404	0.0828407	0.99202	0.910934	0.641359	0.510478	0.320312	0.216735	0.151741	0.101965
O60763	USO1	56	56	1	0.987324	0.998551	0.905059	0.539075	0.193698	0.0570697	0.034643	1	1.00154	1.0117	0.918588	0.555134	0.207485	0.0686305	0.0296829	12.1596	-0.166069	0	0.998715	12.2964	-0.164715	0	0.999187	Yes	Yes	Yes	Yes	63	63	0.99202	0.902198	0.764146	0.572578	0.427102	0.294233	0.208574	0.138842	0.99202	0.926297	0.744185	0.584001	0.412915	0.284967	0.20137	0.136997
O60765	ZNF354A	1	1	1	0.981139	1.15934	0.834943	0.52672	0.309682	0.279674	0.271914	1	0.991982	0.917474	0.794315	0.39007	0.252039	0.176375	0.156898	12.0381	-0.129498	0.230621	0.96947	11.0674	-0.143484	0.119476	0.993658	Yes	Yes	Yes	Yes	1	1	0.99202	0.934155	1.00826	0.816622	0.7121	0.394181	0.290461	0.264677	0.99202	0.927024	0.825553	0.726155	0.429419	0.443865	0.314696	0.198279
O60779	SLC19A2	1	1	1	1.19587	1.08427	0.891075	0.840239	0.667816	0.415424	0.135715	1	1.08643	1.20308	0.93328	0.742525	0.512343	0.272176	0.221368	16.3785	-0.101007	0	0.923325	14.8275	-0.0916522	0	0.947174	Yes	Yes	Yes	Yes
O60783	MRPS14	2	2	1	0.879339	0.944554	0.927579	0.633367	0.38431	0.17866	0.0488355	1	0.978003	1.05595	0.922126	0.739705	0.4279	0.226148	0.0865639	13.2821	-0.12194	0	0.97648	14.104	-0.116863	0	0.992705	Yes	Yes	Yes	Yes	3	3	0.99202	0.878746	0.819715	0.608155	0.374148	0.284845	0.165091	0.10279	0.99202	0.795196	0.643808	0.52789	0.382868	0.248336	0.139493	0.0905978
O60784	TOM1	8	8	1	0.996335	1.07994	1.03075	0.84099	0.976395	0.966192	0.757734	1	0.997679	1.04156	1.01096	0.868945	0.786696	0.958093	0.679994			0	0.573224		-0.0198032	0	0.642966	Yes	Yes			2	2	0.99202	0.968616	0.83711	0.92009	0.788394	0.601232	0.480859	0.519794	0.99202	1.01913	0.983076	0.933044	0.937902	0.784821	0.562322	0.468472
O60825-2	PFKFB2	13	13	1	1.04834	1.04694	1.02234	0.81393	0.716875	0.591759	0.376878	1	1.00065	1.13338	0.998284	0.775511	0.639728	0.47169	0.29559	18.9044	-0.05849	0	0.966677	16.9163	-0.0700304	0	0.961772	Yes	Yes	Yes	Yes
O60826	CCDC22	13	13	1	0.961294	1.00097	0.934683	0.707537	0.406047	0.122352	0.0664406	1	1.00742	1.00621	0.967485	0.730278	0.418041	0.134077	0.0696229	13.6921	-0.134298	0	0.992985	13.8979	-0.136059	0	0.99645	Yes	Yes	Yes	Yes	16	16	0.99202	0.950473	0.832406	0.499538	0.270285	0.165194	0.102107	0.0547084	0.99202	0.97122	0.868487	0.522974	0.272956	0.168242	0.107564	0.0604964
O60828	PQBP1	14	14	1	0.994117	1.0021	1.00285	0.803114	0.832437	0.941924	0.946787	1	0.974213	1.0535	0.995001	0.797552	0.773945	0.79787	0.772155		-0.139579	0.881069	0.630274		-0.112472	0.781265	0.960986	Yes	Yes			13	13	0.99202	0.95873	0.906368	0.916484	0.867082	0.785849	0.766069	0.79192	0.99202	0.920632	0.95209	0.94764	0.982084	0.87142	0.828214	0.762885
O60830-2	TIMM17B	1	1	1	0.975458	0.998565	0.922648	0.793385	0.643357	0.423997	0.290036	1	0.794163	0.850249	0.869443	0.597842	0.407786	0.349872	0.207526	16.6272	-0.071493	0	0.991211	13.54	-0.0801952	0	0.888998	Yes	Yes	Yes	Yes
O60831	PRAF2	2	2	1	0.989441	0.976243	1.05445	0.725692	0.567055	0.489948	0.165128	1	1.08843	1.10149	1.11173	0.815815	0.568813	0.407284	0.195093	15.8953	-0.0811282	0	0.948622	15.9918	-0.0928533	0	0.955411	Yes	Yes	Yes	Yes	3	3	0.99202	0.947183	0.856811	0.811856	0.63986	0.460103	0.417539	0.257584	0.99202	0.88391	0.907894	0.691563	0.592818	0.45693	0.393101	0.268671
O60832	DKC1	21	21	1	0.99408	0.97352	0.878477	0.603807	0.543214	0.517252	0.422291	1	1.02176	0.998259	0.862971	0.588536	0.496692	0.437941	0.356971	16.2161	-0.0873499	0.433597	0.988167	14.2772	-0.0860463	0.322082	0.994607	Yes	Yes			18	18	0.99202	0.961035	0.906984	0.788856	0.638482	0.437163	0.362192	0.335643	0.99202	1.02068	0.912766	0.830911	0.644097	0.490759	0.373545	0.332001
O60841	EIF5B	64	64	1	1.04058	1.02099	0.902017	0.495546	0.223219	0.0771459	0.0849488	1	0.993663	1.00495	0.853882	0.46695	0.216073	0.101009	0.0604114	11.9766	-0.153234	0.0192045	0.997345	11.7093	-0.142212	0	0.99979	Yes	Yes	Yes	Yes	68	68	0.99202	0.974097	0.889049	0.671335	0.372602	0.204196	0.127959	0.0755964	0.99202	0.974203	0.899066	0.664688	0.352686	0.207933	0.13185	0.0783568
O60858-3	TRIM13	2	2	1	0.945014	1.04698	1.03926	0.697202	0.48003	0.28383	0.136503	1	1.02062	0.903062	0.911753	0.623055	0.319352	0.16558	0.0976782	14.4807	-0.103403	0	0.982935	12.9848	-0.122185	0	0.990504	Yes	Yes	Yes	Yes	2	2	0.99202	1.06696	0.981124	0.804468	0.724681	0.516722	0.347713	0.213146	0.99202	0.869373	0.876685	0.761474	0.666664	0.510419	0.373674	0.198751
O60869	EDF1	17	17	1	0.936273	0.890623	0.799695	0.552826	0.462238	0.415584	0.323932	1	0.95964	0.902205	0.797886	0.584056	0.425053	0.441746	0.292074	14.0061	-0.0654602	0	0.97955	13.9572	-0.0667965	0	0.979483	Yes	Yes	Yes	Yes	14	14	0.99202	0.975568	1.04332	1.05201	1.04675	1.03933	0.990024	1.13234	0.99202	1.02389	1.13131	1.07388	1.1317	1.02219	0.944894	0.945996
O60870	KIN	10	10	1	0.989074	0.978757	0.868767	0.444936	0.189662	0.0539439	0.0368406	1	1.00778	1.0348	0.872169	0.437854	0.183451	0.0650993	0.0279007	11.5851	-0.159962	0	0.998808	11.5644	-0.162046	0	0.998588	Yes	Yes	Yes	Yes	11	11	0.99202	0.908169	0.776807	0.517215	0.265714	0.159775	0.103879	0.0686245	0.99202	0.953042	0.873914	0.51984	0.278871	0.18181	0.127881	0.0822855
O60879	DIAPH2	14	14	1	0.979067	1.0045	0.874943	0.467972	0.209403	0.127354	0.112577	1	1.04786	1.04811	0.922043	0.528667	0.21702	0.14208	0.106715	11.7046	-0.153806	0.065644	0.999371	12.1475	-0.161697	0.0755028	0.996098	Yes	Yes	Yes	Yes	14	14	0.99202	0.907433	0.68177	0.44442	0.276081	0.186517	0.136771	0.0917541	0.99202	0.882227	0.654781	0.439233	0.272347	0.182683	0.128272	0.0952125
O60884	DNAJA2	28	28	1	0.978112	0.991531	0.915669	0.616618	0.371381	0.181659	0.0778126	1	1.00332	1.00649	0.920242	0.634847	0.364376	0.173428	0.0839951	13.1474	-0.117556	0	0.996848	13.2231	-0.120046	0	0.998423	Yes	Yes	Yes	Yes	25	25	0.99202	0.962222	0.896026	0.763038	0.624864	0.473624	0.312776	0.188674	0.99202	0.96809	0.86446	0.75878	0.636833	0.457639	0.299747	0.180665
O60885	BRD4	18	18	1	1.0525	1.10242	1.05279	0.799342	0.723597	0.53828	0.278705	1	1.00405	1.03773	0.994297	0.788124	0.624587	0.423593	0.245962	17.7398	-0.0733733	0	0.944553	16.3665	-0.0794508	0	0.991016	Yes	Yes	Yes	Yes	20	20	0.99202	0.953061	0.916974	0.803298	0.626482	0.510477	0.402884	0.311409	0.99202	0.961211	0.957607	0.793439	0.662545	0.519157	0.401928	0.3078
O60888-2	CUTA	4	4	1	1.04392	1.07825	1.07611	0.768038	0.90242	1.13522	0.888993	1	1.21742	1.09159	1.12458	0.912088	0.787894	0.690232	0.565548		-0.033639	0.926823	0.183385		-0.0508268	0.437522	0.794704	Yes	Yes			4	4	0.99202	0.931391	1.06367	1.25279	1.71743	1.49417	1.19477	0.690496	0.99202	1.33098	1.22512	0.89563	0.719138	0.571113	0.406973	0.370979
O60890	OPHN1	2	2	1	0.918126	0.894477	0.981365	0.622999	0.428745	0.205789	0.0432032	1	1.0197	1.01478	0.943169	0.762507	0.329736	0.195228	0.0983875	13.5274	-0.118302	0	0.968116	13.7069	-0.149444	0.0620548	0.996735	Yes	Yes	Yes	Yes	2	2	0.99202	0.985273	0.91167	0.608539	0.323263	0.159292	0.131709	0.0857317	0.99202	1.02232	0.966837	0.628679	0.338461	0.205636	0.125014	0.0728176
O60906	SMPD2	2	2	1	1.07529	1.09098	0.983968	0.726273	0.561117	0.292504	0.161922	1	1.16864	1.12373	1.01467	0.6182	0.518729	0.258334	0.170466	15.0013	-0.0961623	0	0.976519	14.2529	-0.0956821	0	0.941541	Yes	Yes	Yes	Yes	7	7	0.99202	1.00545	0.915799	0.85008	0.818995	0.555612	0.40553	0.245437	0.99202	0.989319	1.00499	0.84225	0.76662	0.59894	0.406322	0.217125
O60907	TBL1X	9	9	1	0.94448	0.999974	1.02613	0.841922	0.77201	0.574936	0.0611431	1	1.12461	1.11782	1.11032	0.950961	0.813918	0.550793	0.0873248	17.6566	-0.137588	0	0.920943	17.847	-0.155704	0	0.934595	Yes	Yes	Yes	Yes	18	18	0.99202	0.968775	0.950601	0.889667	0.839151	0.760395	0.619077	0.484441	0.99202	0.959647	0.949891	0.884016	0.876138	0.781893	0.635437	0.440723
O60911	CTSV	3	3	1	0.999172	1.05713	0.954035	0.845782	0.904741	1.01109	1.12992	1	0.977177	0.976064	0.860057	0.78217	0.733696	0.796954	0.73543		-0.0953993	0.969113	0.0660032		-0.0494995	0.743975	0.960981	Yes	Yes			5	5	0.99202	1.00707	0.865843	0.803569	0.70586	0.599176	0.626684	0.496568	0.99202	0.959762	0.885928	0.789888	0.797178	0.660921	0.613626	0.464976
O60921	HUS1	8	8	1	1.06439	1.17168	1.02331	0.783197	0.597401	0.553734	0.400227	1	1.0765	1.10182	1.06196	0.740123	0.542037	0.46562	0.294036	17.7891	-0.0739138	0.362057	0.923574	15.7164	-0.0878633	0.247209	0.954217	Yes	Yes		Yes	8	8	0.99202	0.905364	0.906725	0.781275	0.586468	0.39229	0.27413	0.149107	0.99202	0.930443	0.871827	0.750174	0.583202	0.375538	0.252441	0.132448
O60925	PFDN1	10	10	1	1.11762	1.12754	1.11385	0.984418	1.1473	1.33857	1.3635	1	1.02742	1.10083	1.00394	0.874319	0.894497	1.00579	0.959049		0.111775	1.36306	0.675975		-0.177945	0.933414	0.414906	Yes	Yes			11	11	0.99202	0.937779	1.00745	1.08688	1.07055	0.987067	0.956319	0.904408	0.99202	0.937811	0.973621	0.875727	0.902434	0.821447	0.753439	0.699442
O60927	PPP1R11	5	5	1	0.869186	1.07382	1.01493	0.799427	0.810507	0.99327	1.00213	1	0.964002	1.02169	0.992367	0.799008	0.748028	0.852462	0.848431		-0.067114	0.901602	0.195893		-0.492069	0.811982	0.881007	Yes	Yes			5	5	0.99202	0.953054	0.863675	0.880909	0.809544	0.807687	0.73995	0.72973	0.99202	0.886112	1.00298	0.953016	0.856747	0.94843	0.799421	0.777698
O60930	RNASEH1	2	2	1	0.970043	1.04378	0.954754	0.594171	0.358547	0.105713	0.0671664	1	0.981139	0.982889	0.89234	0.605025	0.265864	0.133772	0.0655563	12.9655	-0.13318	0	0.992095	12.6542	-0.135317	0	0.997901	Yes	Yes	Yes	Yes	3	3	0.99202	0.94567	0.755708	0.555322	0.419411	0.28584	0.206251	0.130216	0.99202	0.926544	0.757391	0.663764	0.45523	0.287176	0.244365	0.108232
O60934	NBN	17	17	1	0.970762	0.979138	0.917623	0.590003	0.313319	0.182977	0.108952	1	0.973109	0.979857	0.95366	0.624594	0.314329	0.167953	0.111997	12.8284	-0.12092	0.0139037	0.998724	13.0101	-0.134392	0.0463065	0.998857	Yes	Yes	Yes	Yes	14	14	0.99202	0.980304	0.886634	0.70143	0.46156	0.355277	0.242743	0.237143	0.99202	0.94471	0.863481	0.655698	0.450382	0.371117	0.27707	0.196282
O60936-2	NOL3	5	5	1	1.14834	1.07044	1.04406	0.943925	0.930011	1.06886	0.992098	1	0.944667	0.980074	0.929685	0.766144	0.792088	0.79015	0.694573		0.00233243	1.01871	-0.123794		-0.0761022	0.753714	0.895669	Yes	Yes			9	9	0.99202	1.02587	0.992902	0.942073	0.864102	0.807002	0.728419	0.709429	0.99202	0.96769	1.01122	0.856988	0.893753	0.802928	0.723612	0.612832
O60941	DTNB	5	5	1	1.03787	1.01571	0.986362	0.625428	0.274924	0.0971113	0.046537	1	1.07122	1.09273	1.06073	0.660362	0.277586	0.103359	0.0300365	12.9029	-0.156308	0	0.997931	13.1148	-0.167086	0.00149057	0.985472	Yes	Yes	Yes	Yes	3	3	0.99202	0.913355	0.828744	0.549009	0.30176	0.172493	0.157792	0.0742404	0.99202	0.859469	0.71263	0.48702	0.270731	0.15704	0.114916	0.0883948
O60942	RNGTT	17	17	1	1.0577	1.05278	1.02059	0.648083	0.313378	0.192899	0.112213	1	1.00505	1.0193	0.945115	0.651533	0.289578	0.161522	0.113275	13.1162	-0.153402	0.0984022	0.99192	13.0243	-0.145709	0.0619326	0.999309	Yes	Yes	Yes	Yes	17	17	0.99202	0.934738	0.766275	0.491776	0.212942	0.12253	0.0664751	0.0477898	0.99202	0.949492	0.808386	0.529006	0.207223	0.123041	0.0790685	0.0423558
O75027-2	ABCB7	9	9	1	1.06595	1.04055	0.947892	0.580772	0.30134	0.131532	0.0678427	1	1.01399	0.969559	0.924799	0.578163	0.285599	0.122139	0.0750189	12.7506	-0.135711	0	0.994364	12.6358	-0.135617	0	0.998791	Yes	Yes	Yes	Yes	14	14	0.99202	0.876979	0.765458	0.52756	0.345302	0.231404	0.175324	0.111454	0.99202	0.909637	0.683055	0.527553	0.322017	0.227052	0.169101	0.104401
O75037	KIF21B	1	1	1	1.10523	1.17388	0.997567	0.785063	0.760484	0.655973	0.228461	1	0.925862	1.00121	0.919084	0.692015	0.682996	0.424069	0.203973	18.3024	-0.0757549	0	0.854047	16.0388	-0.0729965	0	0.938763	Yes	Yes	Yes	Yes	4	4	0.99202	0.881045	0.793409	0.61512	0.52123	0.326366	0.229475	0.169752	0.99202	0.880379	0.686694	0.614309	0.517959	0.394161	0.238141	0.132471
O75044	SRGAP2	20	20	1	1.03971	1.08412	1.03425	0.642766	0.313425	0.169342	0.084139	1	1.01409	1.06627	1.031	0.710934	0.309368	0.171147	0.107149	13.1334	-0.151513	0.0610162	0.988739	13.3606	-0.165611	0.0901819	0.994195	Yes	Yes	Yes	Yes	24	24	0.99202	0.996983	0.902634	0.73059	0.514777	0.343972	0.223213	0.157331	0.99202	0.964555	0.909411	0.751696	0.568098	0.338903	0.230336	0.150205
O75052	NOS1AP	6	6	1	0.962272	1.02455	0.958722	0.739847	0.714063	0.531434	0.233102	1	1.02419	1.06663	1.03162	0.76542	0.636604	0.471528	0.185838	17.2033	-0.0692174	0	0.937481	16.3895	-0.0824534	0	0.962663	Yes	Yes	Yes	Yes	9	9	0.99202	1.02991	0.96825	0.967068	0.828259	0.690216	0.586584	0.457385	0.99202	0.924226	0.980717	0.854229	0.820944	0.659362	0.562983	0.374959
O75054	IGSF3	15	15	1	1.02708	0.993211	1.0197	0.799512	0.822736	0.587487	0.179633	1	1.05557	1.0836	1.00739	0.830549	0.815213	0.547745	0.212181	18.1095	-0.115655	0	0.92464	17.9776	-0.105216	0	0.944285	Yes	Yes	Yes	Yes	14	14	0.99202	0.95958	0.968769	0.887921	0.814705	0.740555	0.615344	0.512398	0.99202	0.935996	0.945688	0.859523	0.893533	0.750469	0.601473	0.479543
O75061-2	DNAJC6	6	6	1	1.07004	1.11527	1.06173	0.824442	0.640882	0.353037	0.19695	1	0.982453	1.04163	1.0036	0.814909	0.555779	0.265305	0.17062	16.1391	-0.098474	0	0.968162	15.2879	-0.108313	0	0.995166	Yes	Yes	Yes	Yes	4	4	0.99202	1.11815	1.11261	0.975232	0.71617	0.558825	0.39683	0.262592	0.99202	0.949132	0.920752	0.853749	0.746385	0.538853	0.361295	0.295329
O75063	FAM20B	5	5	1	1.1375	1.17048	1.00267	0.780633	0.433998	0.215337	0.0820371	1	1.08913	1.04633	0.990696	0.706076	0.439229	0.160841	0.0664721	14.3608	-0.128359	0	0.961603	13.9299	-0.128553	0	0.98651	Yes	Yes	Yes	Yes	4	4	0.99202	1.09325	0.858544	0.49415	0.360299	0.182907	0.168356	0.0755753	0.99202	0.956873	0.704844	0.504519	0.299564	0.217666	0.120238	0.091052
O75064	DENND4B	3	3	1	0.748857	0.823766	0.781536	0.528707	0.337561	0.240596	0.172146	1	0.992678	0.927208	0.843613	0.646376	0.379276	0.293208	0.165162	12.0185	-0.0909799	0	0.868433	13.3973	-0.0904036	0	0.989865	Yes	Yes	Yes	Yes	2	2	0.99202	1.00257	0.704914	0.441641	0.385449	0.256182	0.163248	0.082848	0.99202	0.768996	1.09785	0.588645	0.368252	0.243192	0.205411	0.0955281
O75071	EFCAB14	2	2	1	1.087	1.29262	1.17605	0.858028	0.750465	0.633352	0.688179	1	1.03109	1.15564	1.05382	0.786363	0.5775	0.480887	0.431108		-0.0806489	0.669832	0.680363	16.6695	-0.0988969	0.422907	0.946295	Yes	Yes			8	8	0.99202	0.973274	0.958632	0.900979	0.884758	0.786855	0.76853	0.794998	0.99202	0.970017	0.972513	0.895125	0.915716	0.833906	0.70701	0.651671
O75083	WDR1	58	58	1	1.00131	1.02233	0.964045	0.706362	0.337502	0.0752374	0.0260787	1	1.00357	1.01949	0.964475	0.749296	0.355694	0.105488	0.0324973	13.4108	-0.159924	0	0.996452	13.6992	-0.157534	0	0.997989	Yes	Yes	Yes	Yes	67	67	0.99202	0.962099	0.910158	0.831635	0.671341	0.358978	0.174513	0.101202	0.99202	0.939585	0.932011	0.809892	0.713166	0.369903	0.18579	0.103393
O75084	FZD7	1	1	1	0.974805	0.988375	0.963209	0.63985	0.473787	0.229723	0.0852886	1	1.00891	1.03882	0.99084	0.644687	0.438593	0.238764	0.0763252	13.8527	-0.107668	0	0.986999	13.7942	-0.112097	0	0.988945	Yes	Yes	Yes	Yes	2	2	0.99202	0.931242	0.828673	0.702258	0.432814	0.310942	0.271529	0.158355	0.99202	0.964479	0.854133	0.683399	0.443331	0.321071	0.240819	0.160972
O75093	SLIT1	6	6	1	1.09338	1.08599	1.03215	0.895543	0.98112	1.14923	1.05552	1	0.970488	1.05057	0.985464	0.882314	0.936824	0.89791	0.852653		0.0503808	1.10235	0.220658		-0.275892	0.892425	0.771757	Yes	Yes			9	9	0.99202	0.974611	0.931838	0.958324	0.871829	0.736019	0.661076	0.611599	0.99202	0.947212	0.993386	0.907033	0.954774	0.868616	0.718567	0.585636
O75096	LRP4	1	1	1	1.14631	1.20513	0.904932	0.643067	0.535822	0.363119	0.0724081	1	0.974676	0.840338	0.849082	0.685592	0.421235	0.218581	0	14.3735	-0.0908763	0	0.9131	13.5679	-0.116972	0	0.94504	Yes	Yes	Yes	Yes	3	3	0.99202	0.913941	0.86795	0.729095	0.615366	0.344459	0.301095	0.220996	0.99202	0.855889	0.791274	0.654072	0.534142	0.390553	0.33187	0.248371
O75110	ATP9A	6	6	1	1.03253	0.953575	0.877727	0.509901	0.285398	0.223883	0.0686929	1	0.999011	0.920989	0.802946	0.511504	0.275315	0.162267	0.0801335	12.2739	-0.116913	0	0.992403	11.8687	-0.11662	0	0.993461	Yes	Yes	Yes	Yes	6	6	0.99202	0.98536	0.888948	0.735485	0.504356	0.324124	0.229868	0.1516	0.99202	1.03123	0.835617	0.768642	0.567371	0.354079	0.278218	0.16125
O75113	N4BP1	20	20	1	1.07408	1.06265	0.992319	0.787702	0.634495	0.470926	0.39732	1	1.01113	1.03322	0.946439	0.748654	0.578617	0.336038	0.292452	17.3772	-0.0692732	0.240959	0.978184	15.6564	-0.0773599	0.01217	0.992406	Yes	Yes	Yes	Yes	16	16	0.99202	0.998809	0.912722	0.791829	0.570498	0.466673	0.397888	0.375277	0.99202	0.9668	0.931941	0.763519	0.580407	0.467723	0.393405	0.327988
O75116	ROCK2	84	84	1	1.00653	1.03554	0.992068	0.76294	0.456703	0.104826	0.0509189	1	1.0134	1.02456	0.979587	0.774057	0.476154	0.128807	0.0551616	14.1684	-0.147057	0	0.991384	14.3313	-0.142361	0	0.992323	Yes	Yes	Yes	Yes	78	78	0.99202	0.990304	0.930773	0.736432	0.471459	0.295934	0.196457	0.110848	0.99202	0.958814	0.944727	0.73469	0.510047	0.315953	0.205343	0.124655
O75128-2	COBL	1	1	1	0.894791	1.08772	1.02555	0.730929	0.526698	0.45782	0.258325	1	1.01608	1.04953	0.890674	0.783196	0.587085	0.425007	0.322937	15.6412	-0.0818621	0.140154	0.950192	16.4287	-0.0662166	0	0.990113	Yes	Yes	Yes	Yes
O75131	CPNE3	41	41	1	0.999371	0.980438	0.933493	0.656721	0.419713	0.21247	0.0803112	1	1.00772	0.988476	0.901959	0.644003	0.419384	0.23192	0.106887	13.6265	-0.113013	0	0.995086	13.5464	-0.104698	0	0.996055	Yes	Yes	Yes	Yes	40	40	0.99202	0.965105	0.848269	0.578945	0.264276	0.129697	0.0798102	0.0396399	0.99202	1.01244	0.979376	0.654357	0.283134	0.149866	0.0944045	0.0508466
O75140	DEPDC5	1	1	1	0.929387	1.20925	1.01687	0.984446	0.420902	0.278218	0.285583	1	1.00845	0.784169	0.789832	0.506718	0.460265	0.391096	0.168429	14.592	-0.292643	0.27935	0.949681	12.5957	-0.0747227	0	0.928883	Yes	Yes	Yes	Yes	3	3	0.99202	0.974279	0.909482	0.742122	0.511189	0.329634	0.206653	0.127945	0.99202	0.962697	0.827816	0.712827	0.502777	0.290453	0.179926	0.122475
O75143-5	ATG13	7	7	1	1.17069	1.18243	1.11474	0.78934	0.582536	0.341326	0.1669	1	1.00868	1.12058	0.971592	0.727308	0.456423	0.31714	0.171745	15.6433	-0.100806	0	0.922152	14.5687	-0.0967049	0.0125668	0.981872	Yes	Yes	Yes	Yes	11	11	0.99202	0.993264	0.957681	0.85074	0.78132	0.717452	0.624946	0.567109	0.99202	0.973324	0.966625	0.866452	0.77333	0.653593	0.564722	0.494233
O75144-2	ICOSLG	2	2	1	1.04593	1.09715	1.10561	0.829592	0.944404	1.14911	1.25353	1	1.04457	1.13609	1.02132	0.929397	0.810821	0.982548	1.01429			1.06323	0.0293699		-0.0415505	0.93381	0.271147	Yes	Yes			6	6	0.99202	1.03177	1.00254	1.03188	0.898149	0.770754	0.758804	0.655578	0.99202	1.00109	1.08093	1.03715	1.14171	1.02517	0.928638	0.674176
O75145	PPFIA3	2	2	1	1.0228	1.06276	1.06157	0.542577	0.217251	0.0998507	0.0822468	1	1.02802	1.00844	1.00528	0.527208	0.287271	0.0885501	0.0715165	12.287	-0.220996	0.090709	0.990888	12.4392	-0.160295	0.0383317	0.992559	Yes	Yes	Yes	Yes	3	3	0.99202	0.941476	0.779242	0.58248	0.360584	0.230535	0.164062	0.110449	0.99202	0.984507	0.803304	0.652405	0.366904	0.263974	0.185174	0.121241
O75146	HIP1R	43	43	1	0.988292	1.01667	0.976063	0.658109	0.340071	0.14792	0.0763187	1	1.02025	1.04035	0.973005	0.651949	0.342034	0.155084	0.0916233	13.3122	-0.134162	0	0.998896	13.3005	-0.130654	0.00350946	0.99756	Yes	Yes	Yes	Yes	30	30	0.99202	0.918744	0.777354	0.55657	0.361985	0.240473	0.173563	0.115476	0.99202	0.92463	0.719605	0.544258	0.338635	0.227218	0.170664	0.108863
O75150	RNF40	42	42	1	0.993705	1.00015	0.974285	0.772267	0.768138	0.666842	0.251934	1	0.996403	1.03922	1.00203	0.817049	0.734239	0.564107	0.230067	18.5366	-0.0686719	0	0.882968	17.7111	-0.0804023	0	0.953962	Yes	Yes	Yes	Yes	32	32	0.99202	0.944549	0.783466	0.5241	0.340165	0.213199	0.144067	0.0897327	0.99202	0.919748	0.819794	0.546421	0.340749	0.227744	0.159036	0.0929446
O75152	ZC3H11A	10	10	1	1.04596	0.946151	0.893642	0.482546	0.251167	0.122693	0.105519	1	0.956182	0.922163	0.830111	0.456139	0.220529	0.145713	0.0764542	11.9333	-0.144151	0.0494237	0.995302	11.596	-0.129996	0	0.993196	Yes	Yes	Yes	Yes	9	9	0.99202	1.00259	0.925233	0.693864	0.459913	0.342282	0.276398	0.212419	0.99202	0.977314	0.868086	0.669084	0.455632	0.355509	0.260722	0.198166
O75153	CLUH	72	72	1	1.06474	1.03783	1.02328	0.812413	0.686498	0.296172	0.0438061	1	0.994967	1.00469	0.969947	0.771794	0.635973	0.303574	0.0480211	15.9908	-0.13868	0	0.969382	15.496	-0.117005	0	0.969797	Yes	Yes	Yes	Yes	77	77	0.99202	0.958414	0.874446	0.694282	0.452964	0.277749	0.18566	0.106255	0.99202	0.961575	0.891787	0.679775	0.448819	0.274618	0.181287	0.105538
O75157	TSC22D2	2	2	1	0.994832	1.03713	1.05156	0.852408	0.932405	0.550756	0.267705	1	0.984918	1.10437	1.10978	0.856264	0.83797	0.592756	0.315659	18.4081	-0.144007	0.131165	0.954331	18.7662	-0.0881459	0	0.927715	Yes	Yes	Yes	Yes	4	4	0.99202	0.867978	0.903345	0.892518	0.812273	0.717302	0.701941	0.748078	0.99202	0.948381	0.986234	0.877716	0.946276	0.938765	0.849732	0.736429
O75164	KDM4A	13	13	1	1.06342	1.04663	0.98724	0.755947	0.487139	0.204721	0.103673	1	0.975849	1.00258	0.958874	0.705918	0.447527	0.174342	0.099888	14.4736	-0.119872	0	0.990904	13.9751	-0.119637	0	0.995163	Yes	Yes	Yes	Yes	15	15	0.99202	1.05075	0.990995	0.80878	0.500769	0.28967	0.190012	0.139167	0.99202	0.965172	0.935733	0.74963	0.447378	0.273904	0.177382	0.117107
O75165	DNAJC13	48	48	1	0.989549	0.991403	0.868642	0.42095	0.146275	0.0857919	0.0634023	1	0.994647	0.990079	0.889518	0.442256	0.157068	0.0908311	0.0608527	11.4005	-0.171148	0.0258849	0.999575	11.5763	-0.171819	0.0283734	0.999754	Yes	Yes	Yes	Yes	34	34	0.99202	0.876389	0.723774	0.479529	0.296115	0.176453	0.12189	0.0810827	0.99202	0.931959	0.666586	0.492532	0.282468	0.178059	0.109313	0.0720286
O75167-4	PHACTR2	4	4	1	1.03624	1.08073	1.04476	0.761407	0.713733	0.593155	0.177482	1	0.978692	1.10929	0.990477	0.805222	0.692681	0.498582	0.171987	17.4069	-0.0787955	0	0.904792	16.8936	-0.0877902	0	0.948262	Yes	Yes	Yes	Yes	6	6	0.99202	0.989961	0.928318	0.937303	0.78238	0.630006	0.602584	0.61884	0.99202	0.948687	1.01002	0.906104	0.952737	0.74401	0.653857	0.600468
O75170-3	PPP6R2	15	15	1	1.04188	1.01124	0.953011	0.640543	0.384833	0.184779	0.099574	1	1.00194	1.06005	0.953449	0.664988	0.395813	0.186654	0.0971608	13.4193	-0.117742	0	0.996668	13.5855	-0.118571	0	0.995209	Yes	Yes	Yes	Yes	24	24	0.99202	0.969564	0.846429	0.743105	0.631113	0.441454	0.326718	0.231246	0.99202	0.945397	0.834096	0.726588	0.664124	0.468826	0.330945	0.225977
O75175	CNOT3	13	13	1	0.975988	0.990056	0.960565	0.645259	0.431478	0.283067	0.192032	1	0.994024	0.986694	0.929584	0.651814	0.396795	0.259485	0.191522	13.8344	-0.101809	0.0854135	0.996666	13.5991	-0.105249	0.0813947	0.999775	Yes	Yes	Yes	Yes	16	16	0.99202	0.94819	0.845825	0.649757	0.482027	0.382738	0.305008	0.238273	0.99202	0.93331	0.851105	0.632874	0.439312	0.407626	0.330102	0.225667
O75179	ANKRD17	24	24	1	0.995512	0.994542	0.89279	0.592857	0.377648	0.22712	0.0990589	1	0.994506	0.995021	0.874374	0.568323	0.354631	0.197916	0.108319	13.0741	-0.106751	0	0.997049	12.7654	-0.109097	0	0.998613	Yes	Yes	Yes	Yes	25	25	0.99202	0.989874	0.894624	0.696012	0.49336	0.347737	0.262271	0.190786	0.99202	0.998367	0.904861	0.705264	0.505081	0.346144	0.261217	0.194789
O75182	SIN3B	4	4	1	1.05797	1.02005	0.96538	0.569705	0.276296	0.113387	0.0391029	1	0.984875	0.991294	0.916182	0.5749	0.304294	0.116713	0.0747592	12.6301	-0.147832	0	0.995647	12.6446	-0.132801	0	0.998554	Yes	Yes	Yes	Yes	8	8	0.99202	0.934184	0.776465	0.609129	0.413957	0.271128	0.212504	0.172653	0.99202	0.915213	0.757354	0.613353	0.418545	0.299666	0.244532	0.177133
O75190	DNAJB6	8	8	1	1.05034	1.00943	0.926394	0.569674	0.32248	0.121769	0.035351	1	1.07637	1.09128	0.965331	0.619551	0.316649	0.133304	0.0407262	12.683	-0.135327	0	0.994299	13.0038	-0.140651	0	0.987853	Yes	Yes	Yes	Yes	6	6	0.99202	0.862377	0.794178	0.648119	0.466691	0.351059	0.340675	0.249624	0.99202	0.980999	0.862825	0.655937	0.529003	0.418558	0.336885	0.251041
O75191	XYLB	4	4	1	1.13201	1.24274	1.17695	0.88722	0.672337	0.305048	0.0827058	1	1.09003	1.17213	1.10942	0.8797	0.596057	0.314549	0.112368	16.1276	-0.140307	0	0.91033	15.7835	-0.122991	0	0.952481	Yes	Yes	Yes	Yes	2	2	0.99202	0.978293	0.993768	0.811091	0.573902	0.382377	0.232609	0.138895	0.99202	1.01353	0.809973	0.681331	0.479161	0.347849	0.223929	0.137132
O75197	LRP5	2	2	1	0.995139	1.00679	0.934839	0.58229	0.328073	0.206844	0.146997	1	1.03802	1.05397	0.975428	0.783736	0.359571	0.233782	0.14316	12.8042	-0.127194	0.0913604	0.999511	13.8879	-0.152761	0.125899	0.994589	Yes	Yes	Yes	Yes	3	3	0.99202	1.0043	0.891026	0.817056	0.615633	0.412443	0.367637	0.28596	0.99202	0.957547	1.04248	0.798886	0.735189	0.472618	0.358092	0.226433
O75204	TMEM127	2	2	1	0.958336	0.937187	0.897382	0.496832	0.198353	0.0984915	0.019574	1	1.02503	0.993423	0.944191	0.60224	0.266923	0.145607	0.0408016	11.9457	-0.156173	0	0.994738	12.7575	-0.14286	0	0.998529	Yes	Yes	Yes	Yes	1	1	0.99202	1.03731	1.03769	0.753115	0.644996	0.467805	0.345023	0.26148	0.99202	1.05766	0.836114	0.702346	0.52556	0.410003	0.2489	0.262733
O75208	COQ9	12	12	1	0.978611	0.975798	0.966055	0.826459	0.996438	1.10626	0.950395	1	1.01856	1.02726	0.975062	0.850502	0.861265	0.928596	0.783051		-0.0722137	0.969122	0.00861597		-0.374709	0.855853	0.793618	Yes	Yes			10	10	0.99202	0.972098	0.95132	0.873261	0.924049	0.863802	0.809091	0.762244	0.99202	0.999601	0.97866	0.890359	0.962254	0.883553	0.802287	0.669529
O75223	GGCT	20	20	1	0.962901	1.00642	0.950899	0.815273	0.920188	1.1532	1.10859	1	0.998257	1.01349	0.949954	0.850456	0.850971	0.901713	0.931912		-0.0523212	0.98963	-0.00398437		-0.336817	0.883763	0.832444	Yes	Yes			24	24	0.99202	0.96835	0.95242	0.878393	0.929084	0.781393	0.502709	0.233815	0.99202	0.949943	0.973445	0.894682	0.975982	0.80745	0.52047	0.236668
O75251	NDUFS7	6	6	1	0.989555	0.993171	0.917595	0.548932	0.274785	0.107087	0.0513707	1	1.03805	1.04516	0.922828	0.59571	0.292009	0.112373	0.0478013	12.4258	-0.140869	0	0.998934	12.724	-0.140773	0	0.99611	Yes	Yes	Yes	Yes	5	5	0.99202	0.847883	0.683104	0.477291	0.33157	0.186747	0.0819098	0.0222083	0.99202	0.895376	0.672653	0.519481	0.357291	0.18878	0.100332	0.0449113
O75298	RTN2	1	1	1	0.966288	1.1297	1.1488	0.839118	0.738766	0.396296	0.124308	1	1.00251	0.876566	1.08496	0.913618	0.658533	0.321949	0.150061	16.7457	-0.121434	0	0.937324	16.2364	-0.123922	0	0.971923	Yes	Yes	Yes	Yes	1	1	0.99202	0.81044	0.925554	0.970491	0.891832	0.711823	0.517336	0.294492	0.99202	0.981331	0.784399	0.867234	0.937047	0.786771	0.469641	0.310502
O75306	NDUFS2	28	28	1	1.0037	0.996288	0.946142	0.608573	0.334573	0.148598	0.0711447	1	1.04244	1.09836	0.994012	0.645993	0.33617	0.148379	0.076343	13.0029	-0.129222	0	0.99872	13.2654	-0.135424	0.00113417	0.989279	Yes	Yes	Yes	Yes	36	36	0.99202	0.913122	0.877883	0.785714	0.650659	0.473352	0.29273	0.120908	0.99202	0.94441	0.904322	0.784154	0.658205	0.469963	0.296143	0.139423
O75312	ZNF259	23	23	1	1.02393	1.01976	1.02885	0.833233	0.987105	1.13839	1.1364	1	1.00859	0.992938	0.983744	0.856175	0.880548	0.928863	0.919889		0.166573	1.13753	0.534859		-0.295059	0.896369	0.848724	Yes	Yes			24	24	0.99202	0.979464	0.918382	0.859385	0.807622	0.748442	0.676262	0.65391	0.99202	0.946354	0.954316	0.862393	0.893165	0.779094	0.679738	0.59431
O75317	USP12	4	4	1	1.11107	1.07847	1.03598	0.746142	0.424957	0.256514	0.0853148	1	1.0257	1.07851	0.949156	0.669002	0.413212	0.227328	0.141811	14.2985	-0.119861	0	0.978152	13.794	-0.106757	0	0.992551	Yes	Yes	Yes	Yes	1	1	0.99202	0.910484	0.860028	0.708449	0.522387	0.266492	0.232936	0.0973715	0.99202	1.0049	0.808558	0.620544	0.531914	0.385077	0.198903	0.0692822
O75319	DUSP11	1	1	1	0.977558	1.01039	0.653716	0.39256	0.124294	0.157257	0.0473978	1	0.910311	0.95973	0.809347	0.469738	0.118463	0.0787412	0	10.401	-0.136711	0	0.990583	11.3745	-0.160818	0	0.985371	Yes	Yes	Yes	Yes	2	2	0.99202	0.933743	0.700681	0.421156	0.202504	0.178742	0.102229	0.0581828	0.99202	0.855197	0.582166	0.347074	0.21933	0.144793	0.0833197	0.0883507
O75323	GBAS	7	7	1	0.930603	0.971225	0.944096	0.623349	0.238411	0.0536012	0.0180131	1	0.967106	0.956216	0.91472	0.728301	0.289526	0.0896847	0.0386537	12.7227	-0.173354	0	0.99411	13.3499	-0.165175	0	0.993396	Yes	Yes	Yes	Yes	6	6	0.99202	0.951726	0.761104	0.445109	0.201619	0.117375	0.057229	0.0270408	0.99202	0.930523	0.743738	0.466173	0.196286	0.116672	0.076046	0.043491
O75324	SNN	1	1	1	0.939259	0.980876	0.957798	0.755079	0.608407	0.721228	0.559273	1	0.967774	1.03932	0.989933	0.729736	0.590661	0.610213	0.443642		-0.0811612	0.61351	0.915523		-0.0786393	0.478995	0.960929	Yes	Yes
O75326	SEMA7A	1	1	1	0.873874	0.641419	0.778559	0.645644	0.514846	0.43737	0.247425	1	1.11143	0.868249	0.964745	0.778668	0.547102	0.384751	0.208261	13.9886	-0.0716772	0	0.775207	15.5788	-0.0849362	0	0.955992	Yes	Yes		Yes	3	3	0.99202	1.07244	0.991323	0.903467	0.752287	0.478177	0.367138	0.19025	0.99202	0.980905	0.922681	0.888363	0.687272	0.416746	0.294645	0.165996
O75330-3	HMMR	22	22	1	0.996842	1.0192	0.888667	0.428995	0.120241	0.0618876	0.0497021	1	0.985032	1.00899	0.869693	0.385576	0.116895	0.0721283	0.0517623	11.4857	-0.183872	0.0124106	0.999102	11.2206	-0.186853	0.024008	0.999442	Yes	Yes	Yes	Yes	32	32	0.99202	0.963019	0.91522	0.748114	0.536805	0.322121	0.251327	0.188286	0.99202	0.93238	0.883688	0.740128	0.558383	0.336601	0.249769	0.18589
O75340	PDCD6	10	10	1	1.03224	0.941201	0.923048	0.733687	0.781429	0.972681	0.997925	1	1.01728	1.05957	0.985042	0.80371	0.734869	0.796711	0.887358		-0.055086	0.880703	0.313448		-0.437438	0.805662	0.848268	Yes	Yes			8	8	0.99202	0.970042	0.910345	0.840535	0.745103	0.653513	0.51124	0.436433	0.99202	0.946649	0.99174	0.8183	0.812531	0.652934	0.52796	0.37617
O75347	TBCA	20	20	1	1.06668	1.00636	1.0445	0.763585	0.855323	0.922834	0.964576	1	1.00503	1.11358	1.06374	0.991922	0.886818	1.73443	1.59243		-0.0546953	0.879624	0.555048		0.315621	1.5	0.850348	Yes	Yes			24	24	0.99202	0.935407	0.944937	0.880155	0.923665	0.855025	0.795291	0.855653	0.99202	0.880731	0.953721	0.9071	0.979892	0.872228	0.820037	0.769575
O75348	ATP6V1G1	3	3	1	1.06458	1.08609	0.961072	0.793288	0.713494	0.530307	0.312321	1	1.1438	1.13314	1.05034	0.770959	0.687838	0.502329	0.269317	17.8363	-0.0651613	0	0.958375	17.225	-0.0728926	0	0.918685	Yes	Yes	Yes	Yes	5	5	0.99202	0.963902	0.89161	0.873755	0.770629	0.689885	0.596933	0.590823	0.99202	0.930278	0.962763	0.830224	0.78704	0.711219	0.6054	0.541358
O75351	VPS4B	27	27	1	0.984726	0.990963	0.957614	0.707166	0.472853	0.179229	0.0372151	1	1.00271	1.00338	0.968558	0.764872	0.470941	0.189024	0.0471386	14.0499	-0.125332	0	0.988057	14.3548	-0.131409	0	0.994366	Yes	Yes	Yes	Yes	25	25	0.99202	0.947969	0.795251	0.526111	0.333753	0.208122	0.144571	0.125192	0.99202	0.910181	0.772753	0.531899	0.326526	0.207602	0.153179	0.0997887
O75352	MPDU1	5	5	1	0.930222	1.06128	0.973039	0.692243	0.497868	0.323906	0.201682	1	1.02578	0.965545	0.997887	0.692145	0.445604	0.294764	0.152139	14.7134	-0.0882244	0	0.984812	14.2934	-0.100393	0.00742042	0.992937	Yes	Yes	Yes	Yes	3	3	0.99202	0.836758	0.803916	0.666281	0.487307	0.328776	0.191453	0.110885	0.99202	0.97386	0.813392	0.676853	0.502252	0.305133	0.206245	0.117527
O75354	ENTPD6	8	8	1	1.00635	1.02921	0.976175	0.6277	0.336416	0.162223	0.0694666	1	1.04002	1.02867	0.980958	0.649982	0.351291	0.164563	0.0739883	13.1723	-0.131025	0	0.997558	13.3409	-0.130165	0	0.996472	Yes	Yes	Yes	Yes	6	6	0.99202	0.930087	0.872409	0.716875	0.546162	0.442165	0.334378	0.236223	0.99202	0.94968	0.790237	0.672362	0.568861	0.410505	0.294027	0.226192
O75356	ENTPD5	2	2	1	0.964787	1.14143	1.05691	0.654921	0.402908	0.245823	0.135197	1	1.02347	0.975063	0.901828	0.630471	0.487005	0.247669	0.0861114	13.6626	-0.12587	0.0953885	0.969163	13.7542	-0.100348	0	0.983004	Yes	Yes	Yes	Yes	5	5	0.99202	0.997334	0.935437	0.760045	0.516933	0.373487	0.302	0.18845	0.99202	0.944602	0.875423	0.71576	0.545392	0.359515	0.282658	0.186807
O75362	ZNF217	6	6	1	1.02462	1.08277	1.06664	0.753976	0.53204	0.377481	0.180519	1	0.960185	0.993348	0.98885	0.757098	0.491688	0.209773	0.173211	15.4042	-0.0918992	0	0.974081	14.5648	-0.111465	0.0174875	0.99374	Yes	Yes	Yes	Yes	9	9	0.99202	0.983441	0.944177	0.77478	0.590446	0.389136	0.218281	0.145118	0.99202	0.997594	0.974191	0.815326	0.612039	0.386817	0.231839	0.148072
O75367	H2AFY	8	8	1	1.00483	1.05685	0.915015	0.436279	0.178878	0.0699061	0.0519807	1	0.988368	1.03808	0.887049	0.461927	0.192973	0.08665	0.052696	11.6504	-0.177447	0.0258319	0.997313	11.7412	-0.156446	0.00512346	0.998697	Yes	Yes	Yes	Yes	3	3	0.99202	0.825527	0.758827	0.60667	0.46543	0.343964	0.191104	0.131941	0.99202	0.960592	0.784688	0.751836	0.510819	0.278932	0.211104	0.168361
O75368	SH3BGRL	15	15	1	1.11814	1.155	1.15383	0.882785	1.01533	1.23136	1.24906	1	1.01446	1.05365	1.00884	0.967346	0.983214	1.09424	1.10561		0.110649	1.24945	0.315151		0.121774	1.03548	0.0719897	Yes	Yes			11	11	0.99202	0.961329	0.884465	0.92446	0.843247	0.791401	0.779865	0.795009	0.99202	0.928582	0.96818	0.921783	1.16443	1.08224	0.977586	0.88354
O75369-8	FLNB	222	222	1	1.004	1.01701	0.976799	0.77771	0.663857	0.334033	0.0728459	1	0.997265	1.00502	0.963038	0.78848	0.622754	0.357544	0.0991296	15.8001	-0.112766	0	0.968568	15.6917	-0.104017	0	0.978928	Yes	Yes	Yes	Yes	218	218	0.99202	0.962861	0.932304	0.828881	0.598703	0.350894	0.244101	0.159192	0.99202	0.95477	0.952633	0.885011	0.635918	0.358182	0.250128	0.161178
O75369	FLNB	2	2	1	0.835552	0.989392	0.933123	0.727567	0.673516	0.424437	0.0567956	1	1.00635	1.01542	0.884719	0.904088	0.671858	0.352561	0.0376763	15.8393	-0.0956361	0	0.885917	16.239	-0.141791	0	0.971423	Yes	Yes	Yes	Yes
O75376	NCOR1	1	1	1	0.918503	1.06784	0.989705	0.70322	0.579096	0.349833	0.195525	1	1.0475	1.13706	1.0917	0.550059	0.420931	0.456899	0.335322	15.279	-0.0853479	0	0.970803	12.1934	-0.442202	0.404282	0.954769	Yes	Yes	Yes		5	5	0.99202	0.899272	0.894079	0.795643	0.696532	0.526272	0.434791	0.326361	0.99202	0.94676	0.892722	0.924042	0.727942	0.639798	0.447735	0.27257
O75379	VAMP4	1	1	1	0.97446	1.22037	1.17496	0.769933	0.832177	1.00949	1.04421	1	1.1051	1.14513	1.14103	0.894434	0.884307	1.00194	0.694142		-0.0257621	0.923096	0.138754		0	0	0.544017	Yes	Yes			1	1	0.99202	1.01801	0.918059	0.35616	0.912707	0.865015	0.777617	0.712198	0.99202	1.08718	1.04261	0.913523	0.964146	1.02263	0.853726	0.797076
O75380	NDUFS6	6	6	1	0.953742	0.977484	0.920379	0.622006	0.536785	0.805398	1.09374	1	1.04219	1.05487	0.996491	0.72583	0.523505	0.658717	0.939338		-0.651474	0.764483	0.300901		-0.634918	0.707187	0.669705	Yes	Yes			6	6	0.99202	0.972303	0.938428	0.990092	0.982179	0.990483	0.88239	1.01287	0.99202	0.966185	1.00332	1.09849	1.19279	1.08891	1.02678	0.974321
O75381	PEX14	12	12	1	0.986244	1.00493	0.947106	0.812314	0.819686	0.865687	0.609707	1	1.05114	1.0281	0.991908	0.811323	0.735226	0.683591	0.486612		-0.0238443	0	0.792934		-0.0422601	0	0.955759	Yes	Yes			19	19	0.99202	0.994796	0.96754	0.882623	0.88449	0.77601	0.732548	0.721395	0.99202	0.98374	1.00956	0.885287	0.866186	0.760153	0.698926	0.614013
O75382	TRIM3	3	3	1	1.00637	0.907081	0.965808	0.549046	0.329848	0.162281	0.0714667	1	1.0231	1.03517	0.947658	0.572539	0.307428	0.123778	0.0707458	12.7509	-0.127121	0	0.987189	12.7193	-0.135306	0	0.997055	Yes	Yes	Yes	Yes	5	5	0.99202	0.970146	0.842242	0.669528	0.44073	0.229798	0.131467	0.0741495	0.99202	0.968189	0.863344	0.722438	0.423433	0.245241	0.171826	0.107558
O75385	ULK1	2	2	1	0.878887	0.884433	0.822764	0.664859	0.306305	0.211727	0.18496	1	1.03223	1.07513	0.90896	0.596052	0.293262	0.20676	0.217058	12.9753	-0.099239	0	0.950514	12.6241	-0.140422	0.160533	0.991215	Yes	Yes	Yes	Yes	1	1	0.99202	0.900704	0.746978	0.456953	0.255421	0.213411	0.0976723	0.0455409	0.99202	0.933974	0.683501	0.566978	0.29313	0.176919	0.105101	0.0621305
O75386	TULP3	5	5	1	1.20978	1.20273	1.11916	0.801916	0.594379	0.367258	0.208998	1	0.990484	1.05102	0.978818	0.695096	0.489242	0.299005	0.146913	15.953	-0.0941205	0	0.898627	14.4951	-0.0971389	0	0.991541	Yes	Yes	Yes	Yes	2	2	0.99202	0.93502	0.946692	0.644714	0.515029	0.365702	0.261492	0.147735	0.99202	0.900126	0.846522	0.577453	0.509263	0.316353	0.252783	0.171201
O75390	CS	40	40	1	0.987596	0.979413	0.951151	0.821385	0.738899	0.255161	0.021338	1	0.994504	0.998025	0.958075	0.811121	0.675866	0.263977	0.035979	16.2238	-0.17873	0	0.967819	15.8384	-0.143665	0	0.972495	Yes	Yes	Yes	Yes	37	37	0.99202	1.00939	0.923356	0.789784	0.592483	0.267238	0.13131	0.066506	0.99202	0.97393	0.981936	0.79836	0.584691	0.248296	0.132394	0.0738905
O75391	SPAG7	11	11	1	1.0198	1.07486	1.02867	0.876003	0.984721	1.20204	1.17937	1	1.02124	1.05698	1.0232	0.857039	0.873312	0.95659	0.921049		0.222291	1.05761	0.0458642		-0.0603961	0.901866	0.717904	Yes	Yes			13	13	0.99202	0.909821	0.941626	0.911676	0.907325	0.844682	0.799976	0.817136	0.99202	0.998293	1.02485	0.936383	1.072	0.964769	0.808818	0.748291
O75394	MRPL33	2	2	1	1.32184	1.53991	1.61232	1.19766	1.15427	1.08281	0.776287	1	1.2196	1.42812	1.41672	1.13484	0.915039	0.848683	0.628372			0	-0.652911		-0.0727509	0.0684319	0.221143	Yes	Yes			2	2	0.99202	0.283027	0.280957	0.337113	0.240133	0.262682	0.253715	0.243798	0.99202	0.331098	0.331739	0.389478	0.308846	0.282538	0.306805	0.316592
O75396	SEC22B	14	14	1	0.989466	0.976212	0.92259	0.629355	0.292937	0.0892569	0.0364816	1	1.00734	1.02371	0.947558	0.658617	0.31043	0.109588	0.0352217	12.8775	-0.149029	0	0.996997	13.1244	-0.148501	0	0.998124	Yes	Yes	Yes	Yes	12	12	0.99202	0.998991	0.896104	0.745099	0.541952	0.275168	0.153363	0.0811054	0.99202	0.954796	0.95428	0.69938	0.516036	0.27245	0.145172	0.087063
O75398	DEAF1	3	3	1	1.00133	1.10752	1.07571	0.775928	0.488366	0.442551	0.280325	1	1.15568	1.17125	1.13222	0.74493	0.573361	0.430712	0.231058	15.028	-0.110832	0.292621	0.962795	15.9368	-0.0854185	0.0586002	0.904857	Yes	Yes	Yes	Yes	1	1	0.99202	0.870511	0.879976	0.955349	0.637321	0.529356	0.573768	0.396988	0.99202	1.02675	0.903787	0.788864	0.658365	0.351271	0.366475	0.365117
O75400-3	PRPF40A	4	4	1	0.973738	0.92621	0.746349	0.524891	0.35653	0.287557	0.21397	1	1.10904	1.03327	0.769648	0.457558	0.279725	0.209833	0.158983	12.21	-0.0851853	0	0.99731	11.48	-0.120114	0.0919163	0.987048	Yes	Yes	Yes	Yes	2	2	0.99202	1.02633	0.907609	0.747195	0.558872	0.489476	0.324896	0.25833	0.99202	1.14264	1.07101	0.75814	0.47765	0.385809	0.241718	0.224003
O75400	PRPF40A	33	33	1	0.887473	0.859874	0.715782	0.389372	0.196886	0.12179	0.101199	1	0.946226	0.859395	0.709297	0.403389	0.203551	0.114119	0.0898547	10.6196	-0.123976	0	0.973369	10.6387	-0.12378	0	0.983597	Yes	Yes	Yes	Yes	34	34	0.99202	0.944449	0.861004	0.676434	0.395296	0.242541	0.190603	0.141333	0.99202	0.930412	0.873301	0.681994	0.401869	0.24617	0.192954	0.138389
O75410-2	TACC1	19	19	1	0.993145	1.00937	0.996674	0.800132	0.894338	0.958323	0.786693	1	1.00875	1.04441	1.04991	0.852948	0.823182	0.791923	0.648403		-0.379333	0.859871	0.662667		-0.0293563	0.163995	0.903795	Yes	Yes			17	17	0.99202	0.953035	0.915944	0.865811	0.812365	0.758077	0.712934	0.708314	0.99202	0.907669	0.953437	0.899676	0.933206	0.877041	0.75628	0.694638
O75414	NME6	6	6	1	0.931257	1.06572	0.937129	0.668733	0.554081	0.30656	0.121185	1	1.08423	1.10546	1.05368	0.674892	0.554913	0.320207	0.130075	14.5727	-0.0928195	0	0.968991	14.8536	-0.0966102	0	0.956673	Yes	Yes	Yes	Yes	8	8	0.99202	0.912302	0.925458	0.863721	0.794671	0.659576	0.514795	0.380079	0.99202	0.977994	0.994888	0.863314	0.799487	0.702538	0.54779	0.367248
O75419-3	CDC45	4	4	1	1.03745	1.09149	0.950525	0.572347	0.288264	0.118587	0.172114	1	0.947793	1.05576	0.934595	0.569944	0.249895	0.140746	0.0787071	12.5234	-0.158288	0.112117	0.988362	12.5024	-0.147388	0.0332199	0.994976	Yes	Yes	Yes	Yes	4	4	0.99202	0.816484	0.744396	0.555667	0.340364	0.244226	0.169364	0.134351	0.99202	0.875375	0.704089	0.519493	0.36573	0.242892	0.162936	0.122796
O75420	GIGYF1	4	4	1	0.956207	1.02896	0.848409	0.686585	0.408058	0.237769	0.160942	1	1.04572	0.959435	0.94811	0.619629	0.299839	0.213443	0.151542	13.6597	-0.0970781	0	0.99011	12.8815	-0.141942	0.120039	0.995988	Yes	Yes	Yes	Yes	4	4	0.99202	1.04551	0.981225	0.788721	0.639981	0.430601	0.300588	0.239543	0.99202	0.964231	0.965237	0.770058	0.604214	0.447131	0.274122	0.171044
O75427	LRCH4	9	9	1	0.95423	0.954835	0.895183	0.546771	0.278122	0.169822	0.131403	1	0.951112	1.00218	0.902595	0.577094	0.280372	0.177075	0.133583	12.3659	-0.130111	0.0595336	0.995995	12.5575	-0.130812	0.0633161	0.997293	Yes	Yes	Yes	Yes	3	3	0.99202	0.844399	0.756092	0.476166	0.281228	0.165733	0.146238	0.0735272	0.99202	0.916303	0.67771	0.503387	0.253268	0.17162	0.109538	0.0836923
O75431	MTX2	6	6	1	0.974584	0.989843	0.905934	0.587301	0.281538	0.151936	0.103495	1	0.999936	0.98328	0.901728	0.604227	0.283203	0.161267	0.103825	12.6521	-0.12858	0.0125228	0.999096	12.7521	-0.125698	0.00529059	0.999135	Yes	Yes	Yes	Yes	6	6	0.99202	0.977197	0.888728	0.691449	0.514015	0.316332	0.192639	0.0884277	0.99202	0.999133	0.911662	0.748707	0.566227	0.328162	0.177108	0.100469
O75436	VPS26A	21	21	1	1.00985	1.07075	0.979471	0.708356	0.365827	0.198266	0.109454	1	1.03218	1.01049	0.90973	0.59789	0.286023	0.124488	0.0678801	13.6948	-0.129029	0.0321574	0.995125	12.7055	-0.135484	0	0.998411	Yes	Yes	Yes	Yes	38	38	0.99202	0.981302	0.991265	0.843638	0.70816	0.583896	0.410349	0.236016	0.99202	0.981084	0.963451	0.819737	0.674866	0.540662	0.345222	0.188452
O75438-2	NDUFB1	1	1	1	0.868001	1.05855	1.01682	0.657832	0.669756	0.563368	0.541601	1	1.07578	1.20162	1.19741	0.914768	0.745953	0.558434	0.424206		-0.180066	0.589148	0.904551	18.9705	-0.07651	0.296025	0.850742	Yes	Yes		Yes	3	3	0.99202	0.684786	0.967424	1.29051	1.39613	1.20501	1.0589	0.602121	0.99202	1.10733	1.04073	0.990241	1.09372	0.941016	0.879265	0.679117
O75439	PMPCB	51	51	1	1.01402	1.00364	0.990939	0.825885	0.849907	0.778602	0.362564	1	1.02317	1.0182	0.95863	0.807428	0.733055	0.5858	0.314249	19.9729	-0.101342	0	0.872406	18.3609	-0.0636834	0	0.961889	Yes	Yes	Yes	Yes	43	43	0.99202	0.988436	0.861356	0.605078	0.36419	0.235386	0.151071	0.0868449	0.99202	0.972105	0.829086	0.590903	0.348751	0.226618	0.143801	0.0900216
O75446	SAP30	4	4	1	1.0299	1.08985	1.01897	0.581695	0.234267	0.0929271	0.0203942	1	0.982493	1.00981	0.95009	0.550306	0.245257	0.0860134	0.0313926	12.6152	-0.172317	0.00457443	0.990991	12.4138	-0.157108	0	0.998808	Yes	Yes	Yes	Yes	5	5	0.99202	0.913275	0.748908	0.528137	0.363983	0.268792	0.209557	0.141275	0.99202	0.92438	0.725406	0.559482	0.358531	0.281932	0.19983	0.148649
O75448	MED24	15	15	1	0.954789	0.990185	0.920387	0.56935	0.244564	0.100547	0.0699615	1	1.04933	0.996819	0.937906	0.592471	0.24878	0.111687	0.0768835	12.4631	-0.14586	0	0.997948	12.6112	-0.151	0.0186575	0.997939	Yes	Yes	Yes	Yes	17	17	0.99202	0.954686	0.873257	0.653836	0.406108	0.244512	0.158108	0.0828635	0.99202	1.03222	0.902226	0.685973	0.405624	0.238131	0.163184	0.102442
O75449	KATNA1	8	8	1	1.07685	1.05592	0.865429	0.473392	0.185361	0.0768188	0.0292251	1	1.02151	0.97605	0.862911	0.444686	0.217821	0.06613	0.0299299	11.7141	-0.156828	0	0.992973	11.6129	-0.152517	0	0.997747	Yes	Yes	Yes	Yes	5	5	0.99202	0.919445	0.685381	0.412212	0.274926	0.165397	0.101252	0.0677238	0.99202	0.905719	0.64608	0.402747	0.233562	0.152916	0.0877635	0.0606136
O75460	ERN1	3	3	1	1.10285	1.2292	1.20198	0.787734	0.495089	0.4751	0.329105	1	1.00319	1.10659	0.986809	0.915847	0.452904	0.320462	0.275851	14.8487	-0.13498	0.3829	0.871188	14.6419	-0.181701	0.279408	0.985839	Yes	Yes		Yes	3	3	0.99202	0.969109	0.816796	0.59522	0.349955	0.335575	0.192155	0.144476	0.99202	0.920059	0.752081	0.552151	0.383559	0.282965	0.197781	0.147828
O75461	E2F6	1	1	1	1.0632	1.15341	1.27348	0.723623	0.439571	0.293219	0.126573	1	0.868087	1.05933	0.98182	0.798621	0.55406	0.348681	0.122953	14.2735	-0.131649	0.115577	0.907286	15.3878	-0.102233	0	0.966117	Yes	Yes	Yes	Yes
O75462	CRLF1	2	2	1	1.0541	0.946306	0.826123	0.612454	0.399286	0.210698	0.0663806	1	0.921353	0.854796	0.775496	0.522777	0.247302	0.111805	0.0415263	12.9558	-0.104834	0	0.981931	11.642	-0.124803	0	0.966894	Yes	Yes	Yes	Yes	1	1	0.99202	0.847974	0.846833	0.688679	0.432541	0.299604	0.22979	0.171022	0.99202	0.818979	0.819707	0.777123	0.658271	0.389705	0.277974	0.199727
O75467	ZNF324	1	1	1	0.867893	0.809254	1.38439	0.780411	0.479504	0.368513	0.166503	1	1.02927	0.911454	1.10654	0.832599	0.495249	0.295369	0.104655	14.8558	-0.125384	0.168663	0.787909	15.0936	-0.119965	0	0.97411	Yes	Yes		Yes
O75475	PSIP1	14	14	1	0.975326	0.983487	0.867162	0.553501	0.364054	0.192308	0.1144	1	0.999575	0.959184	0.887684	0.571409	0.343002	0.21417	0.11823	12.6867	-0.107529	0	0.997115	12.8151	-0.108034	0	0.997997	Yes	Yes	Yes	Yes	16	16	0.99202	0.911794	0.822017	0.685243	0.519011	0.407266	0.372871	0.342422	0.99202	0.948413	0.88155	0.688185	0.556413	0.43682	0.379026	0.324627
O75477	ERLIN1	22	22	1	0.996846	0.975656	0.81278	0.394441	0.100384	0.0392345	0.0300135	1	1.02305	0.980861	0.837509	0.401021	0.115247	0.0433919	0.0325757	11.0404	-0.174629	0	0.997526	11.1841	-0.17521	0	0.998404	Yes	Yes	Yes	Yes	20	20	0.99202	0.746743	0.598023	0.317211	0.179211	0.10298	0.0715959	0.0309393	0.99202	0.915263	0.487141	0.396541	0.151973	0.106823	0.0798134	0.0480731
O75478	TADA2A	3	3	1	1.05898	1.12946	1.07252	0.703375	0.599542	0.473852	0.345583	1	1.00723	1.07564	0.987801	0.726294	0.53576	0.337809	0.360437	16.2358	-0.0815953	0.299955	0.935923	14.9784	-0.0989739	0.284514	0.983751	Yes	Yes	Yes	Yes
O75487	GPC4	3	3	1	1.02615	1.01584	1.05606	0.789315	0.873943	0.804708	0.923429	1	0.942538	1.04504	1.05653	0.928126	0.896362	0.822967	0.958748		-0.089492	0.847694	0.776787		-0.0859176	0.89268	0.578939	Yes	Yes			7	7	0.99202	0.969683	0.902684	0.765235	0.662494	0.601369	0.488052	0.325911	0.99202	0.94994	0.89885	0.761444	0.720895	0.649658	0.476723	0.286667
O75489	NDUFS3	12	12	1	1.02193	1.03288	0.932964	0.605713	0.352773	0.209405	0.101702	1	0.998777	0.975432	0.893388	0.586611	0.335107	0.179332	0.109884	13.1371	-0.114329	0	0.997259	12.8268	-0.114549	0	0.999215	Yes	Yes	Yes	Yes	14	14	0.99202	0.968056	0.932718	0.778567	0.683137	0.59836	0.46603	0.29763	0.99202	1.02404	0.930143	0.806799	0.7259	0.59816	0.444644	0.273873
O75494	SRSF10	1	1	1	1.10668	1.20326	1.02056	0.644835	0.472559	0.344976	0.176897	1	0.950889	0.952705	0.915809	0.572303	0.412335	0.300253	0.174819	14.2892	-0.0978613	0.0893197	0.935294	13.3614	-0.0943672	0.0436383	0.988484	Yes	Yes	Yes	Yes	3	3	0.99202	1.0472	1.00119	0.826015	0.685403	0.486868	0.419098	0.343248	0.99202	1.17385	0.968329	0.904684	0.745179	0.56879	0.378522	0.294148
O75496	GMNN	7	7	1	1.00273	0.992551	0.942024	0.712374	0.634641	0.691233	0.683625	1	1.00041	1.03747	1.00627	0.7686	0.593539	0.552548	0.514849		-0.110562	0.670066	0.988077		-0.100587	0.522427	0.993665	Yes	Yes			6	6	0.99202	1.06154	0.954351	0.770945	0.721262	0.655403	0.639877	0.714171	0.99202	0.962384	1.15072	1.09105	0.9797	0.826658	0.819538	0.773875
O75503	CLN5	10	10	1	0.873692	0.987868	0.963298	0.786396	0.746001	0.731709	0.320393	1	0.990483	1.01098	1.00492	0.821209	0.792694	0.6659	0.344905	19.6738	-0.0547292	0	0.803006	19.3742	-0.0650335	0	0.933124	Yes	Yes	Yes	Yes	10	10	0.99202	0.943077	0.906981	0.846335	0.739283	0.600151	0.506791	0.397864	0.99202	0.931532	0.950293	0.874625	0.848767	0.646082	0.503048	0.354597
O75506	HSBP1	3	3	1	0.944703	1.05137	1.21212	0.637592	1.29757	1.57325	1.8453	1	1.01302	0.942238	1.00966	0.683493	0.918634	1.06001	0.647739		1.09436	1.5	0.69604		-0.0155737	0.401655	0.23039	Yes	Yes			1	1	0.99202	0.877384	0.929162	2.9438	2.69873	1.58849	1.87632	0.904921	0.99202	0.929531	1.08588	1.25347	1.86971	1.33814	0.726971	0.889834
O75509	TNFRSF21	2	2	1	1.03605	1.16082	1.02967	0.853391	0.789796	0.658597	0.569324	1	1.06014	1.05973	1.08021	1.00982	0.704038	0.599237	0.485177		-0.0437103	0.341	0.890555		-0.112752	0.512486	0.953427	Yes	Yes			4	4	0.99202	0.91977	0.961634	0.92687	0.741003	0.642614	0.664771	0.624975	0.99202	1.00515	0.994674	0.843627	0.755696	0.678359	0.538521	0.531504
O75521	ECI2	22	22	1	0.978939	1.00496	1.03422	0.836576	0.91432	1.06041	0.892459	1	0.995325	1.04958	0.978926	0.864896	0.844394	0.827192	0.729648		-0.0261526	0.928543	0.245299		-0.022492	0.587292	0.924172	Yes	Yes			17	17	0.99202	0.99116	0.75411	0.533409	0.332198	0.184273	0.105958	0.0527091	0.99202	0.947356	0.81244	0.54259	0.326753	0.195803	0.120399	0.0728651
O75528	TADA3	9	9	1	0.966272	0.949947	0.864255	0.535417	0.296666	0.166874	0.103822	1	1.00961	1.08803	0.8394	0.54487	0.302832	0.167283	0.10526	12.3282	-0.117229	0	0.996763	12.3411	-0.115784	0	0.991508	Yes	Yes	Yes	Yes	5	5	0.99202	0.896829	0.774588	0.746242	0.624335	0.561882	0.568854	0.562423	0.99202	0.954666	0.83623	0.746307	0.721677	0.653477	0.644242	0.530627
O75529	TAF5L	3	3	1	1.12007	1.10008	0.831277	0.439379	0.214521	0.133368	0.0709006	1	0.910944	0.854512	0.694926	0.314254	0.128965	0.0671639	0.0326795	11.5085	-0.142334	0.0244593	0.981738	10.1981	-0.153738	0	0.97841	Yes	Yes	Yes	Yes	4	4	0.99202	0.834696	0.698367	0.532042	0.336121	0.18714	0.113082	0.05454	0.99202	1.01438	0.682331	0.558004	0.299312	0.197446	0.128038	0.0865686
O75530	EED	14	14	1	1.00117	1.03171	0.963496	0.715873	0.389275	0.181972	0.0948865	1	1.00531	1.02073	0.920467	0.676339	0.370479	0.178904	0.0972525	13.8104	-0.12542	0	0.998797	13.4792	-0.12014	0	0.9984	Yes	Yes	Yes	Yes	13	13	0.99202	0.921741	0.779731	0.539146	0.362187	0.210015	0.133259	0.0674623	0.99202	0.926746	0.720356	0.520678	0.329314	0.197762	0.125802	0.0765522
O75531	BANF1	22	22	1	1.00942	1.17163	1.18376	0.818099	1.02823	1.19655	1.15776	1	1.21338	1.33426	1.30806	1.10956	1.13636	1.17291	1.09212		0.0204943	1.20776	0.103695			1.39047	0.380401	Yes	Yes			24	24	0.99202	0.865794	1.09164	1.3497	1.19399	1.04548	0.941138	0.760078	0.99202	1.05646	1.08186	0.98517	1.00252	0.86309	0.770928	0.70232
O75533	SF3B1	79	79	1	0.991239	0.996588	0.94437	0.687009	0.433908	0.151835	0.0531824	1	0.993272	1.01021	0.955412	0.715786	0.425783	0.161149	0.0616744	13.7382	-0.126923	0	0.992182	13.8848	-0.12932	0	0.995734	Yes	Yes	Yes	Yes	65	65	0.99202	0.918644	0.801449	0.513006	0.253022	0.139222	0.0925777	0.052704	0.99202	0.948045	0.767699	0.544587	0.240249	0.139734	0.0994573	0.0695277
O75534	CSDE1	74	74	1	0.993965	1.01337	0.972441	0.732733	0.405779	0.126968	0.0517887	1	1.00413	1.01174	0.958184	0.730155	0.406088	0.140649	0.0592821	13.8473	-0.141698	0	0.99653	13.8483	-0.137006	0	0.996995	Yes	Yes	Yes	Yes
O75554	WBP4	8	8	1	1.06972	1.06796	1.0589	0.882552	0.958794	1.12461	1.11935	1	1.04733	1.09529	1.0266	0.885813	0.859734	0.95877	0.813836		0.120394	1.12246	0.410399		-0.221764	0.877447	0.666069	Yes	Yes			11	11	0.99202	0.974806	0.942653	0.899146	0.988949	0.930122	0.933088	0.926989	0.99202	1.00337	0.976923	0.883659	0.856225	0.78985	0.713705	0.641973
O75569	PRKRA	18	18	1	0.970216	0.952912	0.896618	0.582047	0.38609	0.224333	0.0910674	1	0.98033	0.984189	0.878855	0.591483	0.373456	0.229992	0.0982088	13.0375	-0.106928	0	0.992398	13.0101	-0.105701	0	0.996244	Yes	Yes	Yes	Yes	12	12	0.99202	1.39616	1.7652	1.27844	0.806431	0.474966	0.316815	0.196563	0.99202	1.66329	1.82791	1.48394	0.941884	0.613714	0.384774	0.247071
O75570	MTRF1	1	1	1	1.0023	1.04759	0.87209	0.485739	0.122888	0.0309042	0	1	0.931614	0.96201	1.02856	0.503577	0.151752	0	0	11.7273	-0.184941	0	0.994991	12.0928	-0.227419	0	0.992179	Yes	Yes	Yes	Yes	2	2	0.99202	0.867707	0.876439	0.514656	0.325416	0.233213	0.115416	0.135823	0.99202	1.06274	0.931955	0.623685	0.372349	0.21591	0.172743	0.113706
O75575	CRCP	2	2	1	1.09551	0.973343	0.895286	0.796467	0.832683	1.04845	0.884021	1	1.18936	1.11886	0.925725	0.744584	0.741891	0.818572	0.84263		-0.0906782	0.891337	0.405465		-0.551175	0.786919	0.706403	Yes	Yes			2	2	0.99202	0.774499	0.623818	0.616871	0.714179	0.908563	0.964095	0.914696	0.99202	0.901243	0.645319	0.642966	0.744403	0.850551	0.93909	0.823191
O75581	LRP6	2	2	1	1.00686	0.933804	0.924001	0.608822	0.352513	0.172241	0.097031	1	1.00974	0.863725	0.894599	0.598361	0.380975	0.177268	0.0794184	13.0574	-0.118453	0	0.994995	13.0017	-0.113577	0	0.976924	Yes	Yes	Yes	Yes	5	5	0.99202	0.856396	0.744876	0.542411	0.363597	0.276444	0.176774	0.136666	0.99202	0.937794	0.719809	0.540492	0.363393	0.286306	0.218583	0.151757
O75582	RPS6KA5	13	13	1	0.976345	1.00701	0.858636	0.480956	0.214134	0.0957038	0.045052	1	1.01248	1.00324	0.901949	0.513007	0.207159	0.101042	0.0508919	11.7812	-0.145186	0	0.998971	12.0604	-0.151142	0	0.999797	Yes	Yes	Yes	Yes	12	12	0.99202	0.895905	0.775206	0.579382	0.416896	0.301392	0.242262	0.134552	0.99202	0.887902	0.743852	0.58161	0.416781	0.290725	0.234161	0.140719
O75586	MED6	5	5	1	0.866801	0.95167	0.952872	0.631978	0.425321	0.168792	0.0545512	1	0.932918	0.993046	1.01348	0.749684	0.490787	0.211209	0.051872	13.4576	-0.120712	0	0.969719	14.4518	-0.12611	0	0.986606	Yes	Yes	Yes	Yes	4	4	0.99202	0.965212	0.843906	0.686512	0.327398	0.193809	0.136335	0.08163	0.99202	1.03093	0.942592	0.732446	0.354034	0.201692	0.163268	0.0869635
O75592	MYCBP2	30	30	1	1.03609	1.03113	0.85854	0.399083	0.184678	0.138969	0.103537	1	1.00251	1.01081	0.867781	0.379537	0.166671	0.107439	0.0766775	11.2559	-0.171898	0.0876949	0.998035	11.2012	-0.180821	0.0628777	0.999816	Yes	Yes	Yes	Yes	12	12	0.99202	0.926212	0.853955	0.605424	0.422458	0.323053	0.252339	0.220307	0.99202	1.08639	0.830529	0.687627	0.461083	0.343322	0.308335	0.24759
O75600-2	GCAT	9	9	1	1.01589	1.03613	0.940863	0.612884	0.420661	0.240882	0.10187	1	0.962029	0.98497	0.931343	0.619041	0.404673	0.275782	0.113351	13.5024	-0.105879	0	0.992689	13.5352	-0.101445	0	0.992899	Yes	Yes	Yes	Yes	5	5	0.99202	0.953795	0.765886	0.557153	0.47628	0.34055	0.197138	0.112347	0.99202	0.920012	0.775238	0.610639	0.506663	0.376019	0.237372	0.123483
O75607	NPM3	7	7	1	0.929195	1.15937	1.1809	0.996479	0.895192	0.832642	0.493212	1	1.12031	1.18833	1.18417	0.923699	0.888369	0.544404	0.403526		-0.100785	0	0.788005	18.6311	-0.121724	0.349079	0.850428	Yes	Yes			8	8	0.99202	0.918427	0.971235	0.893181	0.785727	0.750515	0.6934	0.748535	0.99202	1.03472	0.992486	0.937178	0.797139	0.69153	0.607243	0.568109
O75608	LYPLA1	11	11	1	1.01209	0.978175	0.961057	0.797712	0.90484	1.0301	0.856158	1	1.02375	1.10393	1.00161	0.880807	0.874893	0.906182	0.762481		-0.252061	0.897202	0.367021		-0.0166584	0	0.737112	Yes	Yes			9	9	0.99202	0.949991	0.955621	0.826952	0.654426	0.401367	0.215483	0.094683	0.99202	0.973657	0.944007	0.757034	0.637791	0.395662	0.208365	0.103049
O75616	ERAL1	17	17	1	0.990334	1.03177	1.00304	0.545895	0.226027	0.0805115	0.0447191	1	1.01285	1.04262	0.963075	0.547194	0.247168	0.104825	0.0527507	12.3848	-0.178874	0.0271004	0.996909	12.425	-0.156358	0.0147238	0.997591	Yes	Yes	Yes	Yes	15	15	0.99202	0.891275	0.694408	0.450651	0.258624	0.147213	0.0834577	0.047878	0.99202	0.884435	0.701897	0.487161	0.252484	0.14841	0.100533	0.0538796
O75629	CREG1	4	4	1	1.13543	1.09427	1.05065	0.833177	0.840501	1.11179	0.983053	1	0.966512	1.09212	0.976453	0.81557	0.771177	0.805447	0.720842		-0.0225119	0.945165	0.119475		-0.062533	0.760042	0.892592	Yes	Yes			4	4	0.99202	1.08342	1.07304	0.940212	0.818919	0.785579	0.701864	0.756994	0.99202	0.974067	1.00341	0.874915	0.888594	0.759618	0.701047	0.620207
O75643	SNRNP200	134	134	1	1.02585	1.00568	0.893181	0.456315	0.140699	0.0661241	0.0445955	1	1.00179	0.983797	0.861778	0.455496	0.147977	0.0673973	0.0450996	11.6521	-0.173984	0.00315736	0.999097	11.5548	-0.163503	0	0.998983	Yes	Yes	Yes	Yes	113	113	0.99202	0.905439	0.736513	0.498518	0.257236	0.126333	0.0740062	0.04144	0.99202	0.942416	0.714542	0.521265	0.254295	0.132886	0.0852769	0.052496
O75648	TRMU	12	12	1	0.967593	0.974429	0.935249	0.568367	0.311219	0.160838	0.106669	1	1.01718	1.0688	0.96327	0.633181	0.323199	0.155562	0.0777927	12.6933	-0.129277	0.0325657	0.997708	13.1334	-0.132058	0	0.99533	Yes	Yes	Yes	Yes	14	14	0.99202	0.931845	0.82319	0.5569	0.316204	0.211318	0.14504	0.0900826	0.99202	0.902172	0.724077	0.540167	0.31535	0.200894	0.147087	0.0956818
O75663	TIPRL	15	15	1	0.972573	1.01062	1.02207	0.833908	0.636527	0.225508	0.0250279	1	0.996163	1.02379	1.00789	0.843363	0.642559	0.253809	0.0386344	15.5949	-0.153231	0	0.982605	15.7076	-0.146112	0	0.985598	Yes	Yes	Yes	Yes	14	14	0.99202	0.937539	0.86564	0.648205	0.34431	0.209781	0.126255	0.0690776	0.99202	0.960239	0.918699	0.689592	0.364346	0.202476	0.130594	0.0736171
O75674	TOM1L1	9	9	1	0.959265	0.924277	1.01085	0.844597	0.883816	1.02801	0.973791	1	0.982766	1.02651	0.919579	0.838832	0.77308	0.806284	0.721255			0.944224	0.0934072		-0.0339337	0.722563	0.952561	Yes	Yes			15	15	0.99202	0.988937	0.957853	0.876815	0.85519	0.641884	0.465596	0.266025	0.99202	0.963078	0.983624	0.847906	0.881715	0.668914	0.457946	0.256068
O75676	RPS6KA4	12	12	1	1.0024	1.01737	0.830795	0.457391	0.147372	0.107301	0.0503548	1	1.02669	0.963799	0.80715	0.386736	0.142693	0.0834723	0.0485244	11.4654	-0.151207	0	0.997622	11.0524	-0.157501	0	0.998448	Yes	Yes	Yes	Yes	7	7	0.99202	0.767939	0.560556	0.34193	0.207871	0.122484	0.0803976	0.0572188	0.99202	0.814583	0.502941	0.37467	0.191768	0.136168	0.0971248	0.0550764
O75683	SURF6	6	6	1	0.9706	0.964553	0.798667	0.449993	0.251461	0.155446	0.0506463	1	1.00234	0.990576	0.847301	0.451182	0.226621	0.152426	0.0713489	11.5135	-0.125587	0	0.996564	11.6453	-0.136516	0.0208814	0.999244	Yes	Yes	Yes	Yes	4	4	0.99202	0.918977	0.786092	0.590837	0.418438	0.21714	0.170148	0.125623	0.99202	1.00792	0.696131	0.615034	0.384133	0.243963	0.143239	0.108397
O75688	PPM1B	20	20	1	0.973376	1.03983	1.03373	0.823905	0.899116	1.00177	0.980439	1	0.975614	1.07046	1.03138	0.838566	0.845311	0.903127	0.917312		-0.0425826	0.928871	0.359652		-0.0646169	0.875611	0.76047	Yes	Yes			19	19	0.99202	0.96886	0.935416	0.878954	0.713211	0.478348	0.335461	0.23072	0.99202	0.978871	0.97164	0.859142	0.811479	0.526689	0.339173	0.228132
O75689	ADAP1	7	7	1	1.07798	1.09809	0.982309	0.786617	0.653126	0.398451	0.106437	1	1.00659	0.975808	0.90495	0.73849	0.562193	0.30466	0.119272	16.024	-0.100731	0	0.95686	14.9169	-0.0967792	0	0.981598	Yes	Yes	Yes	Yes	6	6	0.99202	0.945457	0.890048	0.678372	0.400818	0.192075	0.133153	0.10561	0.99202	0.95358	0.873435	0.654746	0.359074	0.181097	0.133794	0.0933252
O75691	UTP20	14	14	1	0.956762	0.943888	0.80693	0.408704	0.220803	0.130985	0.10106	1	1.00208	0.981448	0.856499	0.437448	0.233783	0.15644	0.119831	11.2408	-0.138872	0.0394681	0.995951	11.5279	-0.149048	0.0874684	0.999664	Yes	Yes	Yes	Yes	3	3	0.99202	0.740646	0.651066	0.493147	0.360869	0.23046	0.21659	0.102697	0.99202	0.973342	0.684211	0.593587	0.439113	0.289391	0.270707	0.24862
O75694	NUP155	51	51	1	1.02493	1.04592	0.996989	0.606273	0.258892	0.115572	0.0782908	1	0.990006	1.04427	0.954663	0.561196	0.236886	0.0997061	0.0644978	12.7295	-0.167824	0.0509653	0.996919	12.4438	-0.159919	0.0225166	0.998199	Yes	Yes	Yes	Yes	35	35	0.99202	0.751187	0.560843	0.330345	0.197844	0.125527	0.0891895	0.0532142	0.99202	0.779318	0.436967	0.309488	0.164639	0.100501	0.0787474	0.0496354
O75695	RP2	7	7	1	1.13987	1.20992	1.14789	0.854824	0.732909	0.568077	0.21451	1	1.02395	1.07108	1.04485	0.802465	0.665034	0.409346	0.192462	17.757	-0.0908128	0	0.868983	16.4131	-0.0916602	0	0.975192	Yes	Yes	Yes	Yes	3	3	0.99202	0.94461	0.941071	0.796665	0.651726	0.485107	0.353851	0.270812	0.99202	0.96367	1.02373	0.86406	0.753757	0.568717	0.3406	0.229387
O75717	WDHD1	58	58	1	1.14216	1.20399	1.12652	0.63081	0.246075	0.100526	0.0626331	1	1.01948	1.08207	1.0585	0.644763	0.251057	0.111061	0.0608494	12.7949	-0.199878	0.0637881	0.950849	12.8911	-0.184925	0.0518137	0.990296	Yes	Yes	Yes	Yes	56	56	0.99202	0.962649	0.895077	0.725001	0.508996	0.324164	0.191513	0.115921	0.99202	0.942244	0.879375	0.725147	0.512125	0.320196	0.197592	0.123628
O75718	CRTAP	11	11	1	1.03114	0.988991	0.89315	0.537037	0.211965	0.0645602	0.0340629	1	0.957821	0.998196	0.889697	0.54658	0.2266	0.0960261	0.0386901	12.1492	-0.15788	0	0.997703	12.2276	-0.148506	0	0.997446	Yes	Yes	Yes	Yes	8	8	0.99202	0.932102	0.690276	0.422427	0.261158	0.149475	0.0991242	0.0518979	0.99202	0.957193	0.672088	0.466147	0.239409	0.143743	0.106446	0.0705752
O75746	SLC25A12	25	25	1	1.00918	0.981573	0.896875	0.518253	0.204657	0.0876247	0.0746661	1	1.0141	1.01989	0.928457	0.52402	0.221746	0.103288	0.0843705	12.0533	-0.151892	0.00735774	0.999103	12.1657	-0.160249	0.0405733	0.999381	Yes	Yes	Yes	Yes	18	18	0.99202	0.836187	0.651295	0.438934	0.271449	0.190513	0.133766	0.0826002	0.99202	0.882383	0.620002	0.479853	0.291098	0.171796	0.137754	0.0907881
O75752	B3GALNT1	1	1	1	1.09615	0.992653	1.05801	0.635894	0.295212	0.174362	0.143165	1	0.780613	0.919419	1.01185	0.609833	0.294039	0.188458	0.0900849	12.8819	-0.181569	0.141149	0.986844	12.8832	-0.15372	0.0832674	0.939993	Yes	Yes	Yes	Yes	1	1	0.99202	1.03371	0.822543	0.712739	0.642161	0.508534	0.360922	0.298832	0.99202	1.08177	1.05778	0.872249	0.720935	0.541157	0.351723	0.231968
O75771-8	RAD51D	2	2	1	1.70428	1.94141	1.7092	1.05841	0.559909	0.314752	0.218196	1	0.889461	1.12938	0.937979	0.624421	0.355192	0.159931	0.146135	15.2849	-0.263413	0.255003	0.395505	13.1302	-0.124385	0.047882	0.971148	Yes	Yes		Yes	1	1	0.99202	0.944057	0.761565	0.649381	0.406233	0.244358	0.219895	0.129174	0.99202	0.894803	0.86552	0.702619	0.384305	0.221186	0.216468	0.110223
O75781-2	PALM	4	4	1	1.02474	1.0554	1.05645	0.83834	0.864329	0.938564	0.931131	1	1.05539	1.11726	0.973809	0.847234	0.755713	0.679992	0.669711		-0.0401424	0.89356	0.658466		-0.0466897	0.63261	0.918115	Yes	Yes			1	1	0.99202	1.01687	0.884639	0.638339	0.66318	0.655411	0.601056	0.526787	0.99202	0.909347	0.981198	0.795073	0.881125	0.857672	0.693851	0.501743
O75787	ATP6AP2	8	8	1	0.953023	0.912031	0.906246	0.58973	0.343499	0.221474	0.165989	1	1.01939	1.08479	0.948756	0.651683	0.343315	0.210307	0.162845	12.9147	-0.111937	0.0649217	0.988956	13.2367	-0.129892	0.1037	0.992754	Yes	Yes	Yes	Yes	11	11	0.99202	1.0136	0.912567	0.731036	0.467563	0.256271	0.161288	0.0789319	0.99202	0.972605	0.882991	0.669158	0.440165	0.223805	0.150431	0.0843751
O75792	RNASEH2A	12	12	1	0.958306	0.968041	0.951348	0.62294	0.313434	0.0917191	0.0325281	1	1.01594	1.01277	0.990087	0.693607	0.383064	0.174735	0.0662401	12.9431	-0.148044	0	0.994933	13.6792	-0.130418	0	0.99773	Yes	Yes	Yes	Yes	15	15	0.99202	0.970903	0.909641	0.819086	0.66784	0.394605	0.173915	0.0750157	0.99202	0.965887	0.955881	0.82573	0.708638	0.421701	0.214071	0.110248
O75794	CDC123	13	13	1	0.974973	1.02149	0.967565	0.616377	0.389877	0.188751	0.0536037	1	0.983468	1.01725	0.987594	0.677322	0.426405	0.194962	0.0809851	13.3133	-0.121873	0	0.99246	13.8126	-0.119964	0	0.99488	Yes	Yes	Yes	Yes	16	16	0.99202	0.954384	0.826227	0.607414	0.438515	0.272021	0.174183	0.108746	0.99202	0.932777	0.853456	0.668086	0.449303	0.281033	0.18379	0.118148
O75808	CAPN15	2	2	1	1.01142	0.975805	0.96292	0.611393	0.411597	1.51817	0.329247	1	0.900672	0.968947	0.950252	0.598514	0.432119	0.351328	0.191146		-0.777981	0.717603	0.140328	13.7266	-0.0953467	0.111531	0.972789	Yes	Yes		Yes	4	4	0.99202	1.02513	1.01002	0.772536	0.59284	0.307589	0.14519	0.104683	0.99202	0.956571	0.909459	0.81974	0.540904	0.290769	0.19905	0.0937938
O75815	BCAR3	3	3	1	0.927908	1.01092	0.964624	0.578959	0.318864	0.191901	0.101378	1	0.99393	1.01155	0.928293	0.601226	0.299212	0.147781	0.0900756	12.8236	-0.132765	0.0574428	0.992549	12.8333	-0.129407	0	0.999801	Yes	Yes	Yes	Yes	3	3	0.99202	0.911781	0.865257	0.562671	0.355373	0.271651	0.202824	0.121079	0.99202	0.988176	0.936699	0.600266	0.39494	0.239452	0.193426	0.131219
O75817	POP7	2	2	1	1.18218	1.20442	1.14336	0.869399	0.680395	0.66606	0.597792	1	0.959302	1.00101	0.916099	0.758685	0.587821	0.51877	0.382628		-0.0951168	0.627857	0.773862	17.5776	-0.0552591	0	0.991546	Yes	Yes		Yes	5	5	0.99202	0.954697	0.978416	0.838994	0.708092	0.637674	0.55617	0.359494	0.99202	1.02853	0.971262	0.803617	0.696425	0.607909	0.500885	0.324861
O75818	RPP40	8	8	1	1.01045	1.06663	0.961485	0.745158	0.765343	0.68497	0.39791	1	0.961445	1.0123	0.923948	0.70495	0.670461	0.623519	0.385859	20.6908	-0.0460343	0	0.89646	19.3183	-0.0474874	0	0.941145	Yes	Yes	Yes	Yes	7	7	0.99202	0.959746	1.02716	0.98714	0.994675	0.900195	0.766739	0.452697	0.99202	0.982365	0.964251	0.930324	0.911093	0.841255	0.690299	0.376955
O75821	EIF3G	32	32	1	1.25177	1.32294	1.18777	0.654033	0.351408	0.228668	0.142177	1	0.971751	1.07861	1.01877	0.560286	0.274487	0.166886	0.117143	13.1857	-0.171321	0.168794	0.869757	12.4828	-0.1791	0.124231	0.990633	Yes	Yes	Yes	Yes	43	43	0.99202	1.00613	1.11016	1.05846	1.04481	0.85279	0.617675	0.434712	0.99202	1.12907	1.13153	1.02527	0.91825	0.739968	0.539602	0.34033
O75822	EIF3J	10	10	1	0.954972	1.00172	0.895662	0.577381	0.312392	0.191507	0.276414	1	0.929913	1.03699	0.938432	0.607084	0.338847	0.197179	0.216074	12.4927	-0.137197	0.192812	0.989161	12.8728	-0.136597	0.157867	0.991391	Yes	Yes	Yes	Yes	12	12	0.99202	1.01957	1.31113	1.16749	1.39528	1.29814	1.12377	1.04283	0.99202	1.22513	1.34741	1.19626	1.18523	1.01213	0.88834	0.732719
O75828	CBR3	3	3	1	0.923377	1.068	0.947236	0.702304	0.527118	0.440144	0.153183	1	0.927017	1.0365	0.929686	0.664915	0.502933	0.297196	0.204105	15.1782	-0.0815378	0	0.958651	14.4282	-0.0866796	0	0.98682	Yes	Yes	Yes	Yes	3	3	0.99202	1.04271	0.923409	0.886659	0.694495	0.336771	0.250137	0.144301	0.99202	1.01475	0.974568	0.866682	0.675136	0.334948	0.228192	0.148062
O75832	PSMD10	8	8	1	0.995349	1.03958	0.798353	0.708433	0.416287	0.326942	0.180457	1	1.20614	1.06029	1.16074	0.866268	0.519229	1.18221	0.299632	13.9101	-0.0840083	0	0.979292		-0.0462334	0	0.378327	Yes	Yes	Yes		12	12	0.99202	0.93054	0.904576	0.772512	0.587563	0.383223	0.290193	0.189366	0.99202	1.00194	0.899794	0.787426	0.596097	0.404584	0.271554	0.18473
O75843	AP1G2	10	10	1	1.03239	1.0417	1.00668	0.662606	0.258813	0.0511632	0.0287518	1	1.02164	1.03629	1.00655	0.686654	0.279025	0.0722023	0.0281502	12.9928	-0.178918	0	0.996541	13.1695	-0.172547	0	0.997586	Yes	Yes	Yes	Yes	6	6	0.99202	0.977659	0.789483	0.563949	0.323087	0.163851	0.0791129	0.030217	0.99202	0.91554	0.745454	0.568788	0.330522	0.159391	0.0848906	0.0536162
O75844	ZMPSTE24	19	19	1	0.999028	1.03874	0.98332	0.875824	0.953063	0.733438	0.261936	1	1.03485	1.0411	0.95857	0.829759	0.769992	0.679542	0.295524	19.3562	-0.170949	0	0.96208	18.9719	-0.0701442	0	0.913875	Yes	Yes	Yes	Yes	20	20	0.99202	0.921742	0.781846	0.549988	0.391204	0.238646	0.166011	0.0892386	0.99202	0.895521	0.735544	0.549161	0.376841	0.240309	0.166607	0.098681
O75845	SC5D	2	2	1	0.965264	1.01373	0.905232	0.537764	0.331205	0.190983	0.051163	1	1.09534	1.0121	0.976538	0.618289	0.341446	0.230168	0.0811351	12.5841	-0.120576	0	0.993634	13.2461	-0.120413	0.0107324	0.987338	Yes	Yes	Yes	Yes	1	1	0.99202	1.02149	0.871301	0.721205	0.534269	0.432416	0.238319	0.180627	0.99202	1.00247	0.908773	0.755505	0.63874	0.3908	0.317814	0.207038
O75864	PPP1R37	1	1	1	1.0208	1.12114	0.915489	0.537853	0.359442	0.0863966	0.0376262	1	1.21338	1.0318	1.08622	0.731436	0.387133	0.149217	0	12.5662	-0.133608	0	0.978604	13.842	-0.152011	0	0.957808	Yes	Yes	Yes	Yes	5	5	0.99202	0.939199	0.806663	0.615181	0.462401	0.347274	0.246593	0.141396	0.99202	0.941158	0.796183	0.617788	0.451813	0.317553	0.242234	0.1551
O75865-2	TRAPPC6A	2	2	1	1.26936	1.26767	1.41056	0.909525	0.773768	0.721824	0.417835	1	1.09303	1.03321	0.983922	0.875677	0.631772	0.534864	0.264373	20.2256	-0.0675669	0	0.578137	17.3329	-0.0761898	0	0.96809	Yes	Yes		Yes	3	3	0.99202	0.851554	0.925451	0.992228	0.893947	0.667136	0.462309	0.243928	0.99202	1.04712	0.875208	0.866134	0.724028	0.64044	0.459407	0.228821
O75874	IDH1	52	52	1	1.00993	1.00191	0.956225	0.748799	0.625413	0.540758	0.363587	1	0.995218	1.00551	0.957602	0.755713	0.592395	0.469404	0.334169	17.7902	-0.0561677	0	0.98708	16.7856	-0.0637497	0	0.996767	Yes	Yes	Yes	Yes	41	41	0.99202	0.918097	0.747179	0.484159	0.266441	0.15792	0.0979212	0.0647352	0.99202	0.907116	0.742494	0.50259	0.258457	0.155811	0.108526	0.0657684
O75879	PET112	15	15	1	1.00993	0.968817	0.885525	0.504685	0.18535	0.0398285	0.0184161	1	0.981522	0.969376	0.876439	0.519681	0.197936	0.0629493	0.0342058	11.9184	-0.167828	0	0.997051	11.9863	-0.157131	0	0.997163	Yes	Yes	Yes	Yes	11	11	0.99202	0.81996	0.638154	0.429028	0.244966	0.163484	0.101844	0.0581993	0.99202	0.84228	0.608217	0.430151	0.259076	0.151459	0.11212	0.0655961
O75880	SCO1	7	7	1	0.997063	0.989308	0.943233	0.623004	0.351483	0.14223	0.073269	1	1.00489	1.00926	0.950819	0.721601	0.36291	0.18048	0.0908087	13.1156	-0.128429	0	0.998055	13.7189	-0.128607	0	0.999574	Yes	Yes	Yes	Yes	8	8	0.99202	0.953995	0.819099	0.681324	0.512982	0.411092	0.327676	0.260359	0.99202	0.961174	0.841344	0.691219	0.579377	0.45834	0.338976	0.247777
O75882	ATRN	4	4	1	0.991051	1.03711	1.02273	0.718873	0.635232	0.689762	0.541863	1	1.02479	1.04433	0.978681	0.752624	0.598497	0.509449	0.40717		-0.192513	0.621582	0.954332	17.4244	-0.0696626	0.319335	0.989072	Yes	Yes			10	10	0.99202	0.987084	0.97501	0.876728	0.877782	0.761098	0.693091	0.630328	0.99202	0.929713	0.943625	0.878765	0.942633	0.744875	0.66067	0.560842
O75884	RBBP9	5	5	1	1.16609	1.19053	1.14405	0.827831	0.789265	0.5372	0.135764	1	0.961207	1.01321	0.921851	0.774672	0.703143	0.398535	0.0619593	17.6309	-0.119717	0	0.872004	16.223	-0.110872	0	0.939811	Yes	Yes	Yes	Yes	6	6	0.99202	0.866042	0.889218	0.792797	0.535969	0.321768	0.210161	0.119024	0.99202	0.951721	0.908066	0.760407	0.580561	0.365758	0.220079	0.128687
O75886	STAM2	15	15	1	1.05542	1.09198	1.0467	0.86275	0.926797	0.923805	0.294964	1	1.0061	1.04299	0.984979	0.866586	0.855294	0.786778	0.304243	20.1262	-0.261942	0	0.918058	19.6758	-0.151822	0	0.911315	Yes	Yes	Yes	Yes	8	8	0.99202	1.00821	0.941252	0.875516	0.764253	0.63108	0.47234	0.37925	0.99202	0.968231	0.97876	0.870358	0.805318	0.626041	0.463144	0.368653
O75896	TUSC2	4	4	1	0.822423	1.01586	0.915001	0.791962	0.770682	0.617313	0.298952	1	1.00096	0.934213	0.912325	0.680218	0.746059	0.644493	0.307366	18.6202	-0.0628826	0	0.828739	19.0045	-0.0490764	0	0.853551	Yes	Yes	Yes	Yes	2	2	0.99202	0.964587	0.998648	0.91714	0.848347	0.78379	0.58536	0.344754	0.99202	0.98738	1.01459	0.913998	0.899769	0.793026	0.54246	0.272866
O75897	SULT1C4	2	2	1	0.907836	0.966392	0.835694	0.416231	0.244492	0.0887775	0.0295598	1	0.969456	0.919778	0.899916	0.620586	0.306455	0.131916	0.0838553	11.4468	-0.142811	0	0.988831	12.8632	-0.129244	0	0.991688	Yes	Yes	Yes	Yes
O75907	DGAT1	3	3	1	0.966056	1.0631	1.00763	0.579901	0.403308	0.176753	0.0861993	1	1.06999	0.929547	0.938154	0.643717	0.376095	0.15785	0.0760022	13.2638	-0.11986	0	0.983116	13.3139	-0.123928	0	0.988832	Yes	Yes	Yes	Yes	4	4	0.99202	0.90009	0.766639	0.547219	0.36967	0.234965	0.137321	0.0864095	0.99202	0.892933	0.676025	0.518805	0.3273	0.19981	0.138896	0.0867446
O75909-4	CCNK	9	9	1	0.922654	0.959592	0.95298	0.842432	0.680981	0.37623	0.102626	1	1.03876	1.01778	0.975578	0.869499	0.695885	0.383247	0.131979	16.2957	-0.115743	0	0.968352	16.5163	-0.115897	0	0.98731	Yes	Yes	Yes	Yes	8	8	0.99202	0.898618	0.967183	0.955041	0.860624	0.686222	0.444591	0.297978	0.99202	1.03192	0.992908	0.978657	0.937932	0.716879	0.449395	0.252826
O75911	DHRS3	7	7	1	1.02528	1.00522	0.970023	0.607293	0.293912	0.148097	0.0662819	1	0.997605	0.982793	0.924254	0.578624	0.275337	0.142479	0.0763874	12.8999	-0.139688	0.00876628	0.998555	12.6313	-0.133747	0	0.999741	Yes	Yes	Yes	Yes	5	5	0.99202	0.913171	0.79916	0.590558	0.333185	0.233296	0.157711	0.0896324	0.99202	1.01062	0.736694	0.559001	0.368864	0.235447	0.184478	0.105745
O75915	ARL6IP5	8	8	1	0.941908	0.948199	0.926626	0.753178	0.56761	0.292729	0.0890509	1	1.00873	0.970055	0.96987	0.815579	0.54513	0.293041	0.11976	14.984	-0.105062	0	0.973366	15.2257	-0.111061	0	0.995683	Yes	Yes	Yes	Yes	8	8	0.99202	0.969803	0.877371	0.785789	0.723818	0.542824	0.468151	0.381713	0.99202	0.974091	0.901685	0.771655	0.773948	0.594006	0.481902	0.361619
O75923-13	DYSF	7	7	1	0.983374	0.9464	0.993739	0.70169	0.381734	0.0586352	0.0108386	1	0.993939	1.0534	1.03229	0.749844	0.441003	0.106173	0.0135723	13.5311	-0.158695	0	0.988356	14.0532	-0.152423	0	0.987956	Yes	Yes	Yes	Yes
O75925	PIAS1	4	4	1	1.16034	1.1339	1.02588	0.645511	0.309575	0.129595	0.0397762	1	1.06277	1.01931	0.965799	0.555229	0.278091	0.102743	0.112132	13.1653	-0.149801	0	0.9678	12.4828	-0.156909	0.0623452	0.994273	Yes	Yes	Yes	Yes	6	6	0.99202	0.910673	0.838762	0.60029	0.399604	0.255899	0.190046	0.151888	0.99202	0.903493	0.786742	0.590116	0.373049	0.247858	0.183786	0.111468
O75928	PIAS2	10	10	1	0.975019	1.12272	1.08541	0.721484	0.467918	0.27458	0.186847	1	1.00167	1.01193	1.05868	0.724508	0.469943	0.281855	0.18607	14.3661	-0.117201	0.121434	0.969301	14.4353	-0.112522	0.105558	0.989506	Yes	Yes	Yes	Yes	10	10	0.99202	0.911306	0.818834	0.602371	0.357736	0.204693	0.249488	0.0804008	0.99202	0.922523	0.829688	0.626123	0.353824	0.196269	0.135427	0.0769285
O75934	BCAS2	8	8	1	1.12389	1.10299	0.951043	0.580876	0.402818	0.290842	0.15921	1	0.965066	1.01708	0.828819	0.523838	0.337798	0.199237	0.114866	13.2828	-0.108473	0.104404	0.96872	12.3315	-0.106988	0	0.99673	Yes	Yes	Yes	Yes	12	12	0.99202	0.952572	1.04891	1.19241	1.23625	0.999096	0.827558	0.789479	0.99202	0.974068	1.06138	1.12591	1.3522	1.12534	0.909262	0.735429
O75935	DCTN3	10	10	1	1.03051	1.00392	0.999542	0.841152	0.8903	1.03824	1.02253	1	0.977337	1.03256	0.926477	0.813113	0.783249	0.837557	0.799121		-0.139116	0.948057	0.192725		-0.0922714	0.807318	0.954601	Yes	Yes			10	10	0.99202	0.978825	0.929069	0.881521	0.773115	0.565617	0.361429	0.219462	0.99202	1.00646	0.958702	0.893163	0.808031	0.53781	0.359251	0.199
O75937	DNAJC8	25	25	1	0.986011	1.00751	0.98976	0.843891	0.890634	0.986618	0.869308	1	0.992995	1.06211	0.998816	0.862689	0.830639	0.8618	0.721621		-0.259681	0.897613	0.618691		-0.0245089	0.684379	0.855942	Yes	Yes			34	34	0.99202	0.965688	0.938669	0.939638	0.919582	0.814804	0.682585	0.581008	0.99202	0.973853	0.985198	0.91376	0.930233	0.815111	0.649636	0.503718
O75940	SMNDC1	18	18	1	0.974681	1.00007	0.966718	0.811274	0.884669	0.998133	0.993555	1	0.956605	0.991572	0.951509	0.816749	0.815215	0.834151	0.799875		-0.19677	0.921908	0.247801		-0.140014	0.816413	0.951617	Yes	Yes			17	17	0.99202	0.858854	0.904962	1.01427	0.997653	0.954142	0.971261	0.956923	0.99202	0.943942	0.931216	1.04173	1.22804	1.12468	1.00861	0.953451
O75943	RAD17	7	7	1	1.02286	0.99754	0.854061	0.413831	0.117042	0.0669697	0.0340529	1	0.966559	0.95065	0.785674	0.400709	0.128253	0.0573579	0.0413776	11.3084	-0.173405	0	0.998841	10.9816	-0.159386	0	0.99576	Yes	Yes	Yes	Yes	5	5	0.99202	0.784314	0.558929	0.330786	0.17413	0.0910587	0.0561781	0.0180848	0.99202	0.856119	0.479863	0.343295	0.14238	0.0944558	0.0736188	0.0400098
O75947	ATP5H	34	34	1	0.966856	0.958561	0.91395	0.77354	0.757832	0.663064	0.420669	1	1.01517	1.03048	0.949815	0.821998	0.742776	0.629134	0.360678		-0.0432231	0	0.919261	19.2175	-0.0571486	0	0.95801	Yes	Yes		Yes	34	34	0.99202	0.970015	0.916769	0.883606	0.855947	0.762236	0.721163	0.701739	0.99202	0.951607	0.994998	0.876634	0.953321	0.815628	0.753774	0.657147
O75949	FAM155B	1	1	1	0.736658	0.926912	0.96195	0.559354	0.297349	0.165961	0.214217	1	0.849431	0.841074	0.828257	0.570619	0.405699	0.332305	0.16646	12.431	-0.167688	0.173322	0.908456	13.0189	-0.0827195	0	0.924694	Yes	Yes	Yes	Yes
O75953-5	DNAJB5	1	1	1	0.951593	1.03206	0.957825	0.524576	0.265413	0.197393	0.179953	1	1.11266	1.16789	1.02076	0.6128	0.396923	0.221399	0.195521	12.182	-0.177296	0.17131	0.996676	13.2112	-0.135694	0.166259	0.958087	Yes	Yes	Yes	Yes	2	2	0.99202	1.1033	0.785801	0.44576	0.339711	0.244484	0.181082	0.131387	0.99202	0.976682	0.775599	0.50476	0.421232	0.262503	0.250576	0.124584
O75954	TSPAN9	3	3	1	1.02346	1.17895	1.12074	0.927817	1.03541	1.04241	1.01741	1	1.04635	1.16068	1.03737	0.941614	0.851837	0.911041	0.921877		0.225252	1.05379	0.0718864		-0.237869	0.894918	0.516815	Yes	Yes			1	1	0.99202	0.895333	0.998678	0.814012	0.862246	0.797201	0.914554	0.873677	0.99202	0.934701	1.01367	0.950455	0.998884	0.82418	0.769791	0.681522
O75955	FLOT1	7	7	1	1.0069	1.08279	0.987668	0.680183	0.388045	0.203634	0.120844	1	0.964624	1.01913	0.877894	0.629374	0.336818	0.195127	0.0747934	13.6908	-0.121195	0.0259759	0.992333	13.0231	-0.11678	0	0.994953	Yes	Yes	Yes	Yes	10	10	0.99202	0.921368	0.831132	0.64003	0.407309	0.276163	0.207759	0.144627	0.99202	0.994919	0.786079	0.684308	0.418435	0.273135	0.203976	0.136715
O75962	TRIO	29	29	1	1.04146	1.06393	1.00332	0.600797	0.304764	0.147377	0.0988268	1	0.967584	1.00835	0.928517	0.605713	0.285846	0.147892	0.0973575	12.8558	-0.151538	0.0661559	0.992734	12.7918	-0.134955	0.0217334	0.998914	Yes	Yes	Yes	Yes	29	29	0.99202	0.936757	0.834599	0.642558	0.41841	0.265808	0.186232	0.118874	0.99202	0.942557	0.848164	0.646924	0.437392	0.272181	0.194406	0.130625
O75964	ATP5L	16	16	1	1.07156	1.06333	0.954325	0.578839	0.27452	0.131074	0.0594358	1	1.04855	1.00246	0.901839	0.605081	0.276349	0.133261	0.0662685	12.6731	-0.142323	0.00253478	0.992532	12.7059	-0.1351	0	0.997141	Yes	Yes	Yes	Yes	19	19	0.99202	0.836851	0.752715	0.539329	0.375743	0.248843	0.151184	0.0733435	0.99202	0.906494	0.641033	0.494409	0.310864	0.192565	0.135275	0.0868614
O75971	SNAPC5	1	1	1	1.0663	1.0109	1.10562	0.661148	0.754663	1.00713	0.906727	1	1.01899	1.06277	0.839913	0.557572	0.528671	0.402729	0.434808		-0.0576246	0.838123	0.416817	13.8423	-0.106122	0.41492	0.982164	Yes	Yes
O75976	CPD	46	46	1	1.00122	0.993259	0.984275	0.778357	0.787391	0.802239	0.573669	1	1.01536	1.04495	1.0079	0.82886	0.749624	0.669986	0.490674		-0.0289902	0	0.862515		-0.0442579	0	0.96692	Yes	Yes			55	55	0.99202	0.952099	0.928063	0.862116	0.816287	0.751545	0.682762	0.643194	0.99202	0.969397	0.952372	0.849773	0.850816	0.75955	0.656918	0.576059
O76003	GLRX3	25	25	1	0.992531	1.08482	0.994136	0.859757	0.9523	0.903486	0.32553	1	0.97802	1.03186	0.958687	0.786698	0.779422	0.751148	0.281147	20.1691	-0.230134	0	0.926421	19.3518	-0.0666488	0	0.829076	Yes	Yes	Yes	Yes	24	24	0.99202	1.00286	0.975461	0.921406	0.90135	0.715001	0.446083	0.256227	0.99202	0.952077	0.992833	0.906932	0.91945	0.694447	0.411854	0.222925
O76021	RSL1D1	27	27	1	0.933798	0.951256	0.758566	0.354999	0.134315	0.045102	0.0227223	1	0.972607	0.931271	0.772132	0.344857	0.135885	0.0551835	0.0253053	10.6957	-0.163705	0	0.994031	10.721	-0.164781	0	0.996026	Yes	Yes	Yes	Yes	20	20	0.99202	1.12599	1.23951	1.06732	0.672782	0.314886	0.163732	0.0932711	0.99202	1.50801	1.19019	1.29024	0.736895	0.328781	0.216676	0.137955
O76024	WFS1	13	13	1	1.09689	1.03142	1.02294	0.748084	0.546891	0.353513	0.138043	1	1.0534	1.07006	0.99778	0.779485	0.553266	0.366773	0.167158	15.2241	-0.0965727	0	0.976432	15.4741	-0.0933975	0	0.984932	Yes	Yes	Yes	Yes	15	15	0.99202	0.955371	0.874917	0.710251	0.460014	0.24887	0.156865	0.0751543	0.99202	0.920815	0.827201	0.731555	0.475963	0.264656	0.164089	0.0968288
O76031	CLPX	34	34	1	1.10316	1.08971	0.952584	0.532981	0.18894	0.0695322	0.0475848	1	1.00428	1.0262	0.921606	0.515777	0.189915	0.0793062	0.0462199	12.2065	-0.178715	0.0158136	0.987717	12.0826	-0.163691	0.00115297	0.999419	Yes	Yes	Yes	Yes	32	32	0.99202	0.870378	0.723963	0.498018	0.333619	0.210615	0.143485	0.0817614	0.99202	0.902563	0.669409	0.504958	0.301978	0.199233	0.135671	0.087018
O76041-2	NEBL	11	11	1	1.02021	0.992866	0.969854	0.715018	0.713638	0.714541	0.646111	1	1.01152	1.07012	0.998507	0.821954	0.67958	0.64391	0.551337		-0.120922	0.689597	0.98111		-0.0596236	0.532571	0.972527	Yes	Yes			12	12	0.99202	0.918349	0.924148	0.895131	0.875733	0.851596	0.787137	0.790423	0.99202	0.949611	0.971116	0.939478	0.974947	0.891935	0.806268	0.780308
O76054	SEC14L2	15	15	1	1.04064	1.04728	1.01992	0.832727	0.935456	0.832746	0.333297	1	1.00431	1.05776	0.949355	0.819944	0.785463	0.720298	0.309861	19.9831	-0.178637	0	0.910299	19.3913	-0.0682063	0	0.880306	Yes	Yes	Yes	Yes	10	10	0.99202	1.00882	0.969128	0.857228	0.761122	0.548573	0.221514	0.128431	0.99202	0.961235	0.972507	0.84997	0.828664	0.55325	0.228257	0.139584
O76061	STC2	1	1	1	1.11626	1.02943	0.974786	0.806342	0.525189	0.987706	0.647478	1	0.787136	0.714287	0.690923	0.543092	0.696432	0.580494	0.585173		-0.615858	0.720124	0.564456			0.123977	0.885862	Yes	Yes
O76062	TM7SF2	2	2	1	0.962087	1.16026	1.31754	0.494423	0.275367	0.183383	0.0991692	1	1.09983	1.05683	0.984759	0.527667	0.221073	0.0903765	0	12.0001	-0.372439	0.181808	0.910716	12.3081	-0.170686	0	0.988686	Yes	Yes	Yes	Yes	1	1	0.99202	0.726354	0.536329	0.373687	0.197605	0.175596	0.103654	0.0390464	0.99202	0.839958	0.440092	0.356026	0.202938	0.153971	0.117277	0.0923987
O76064	RNF8	1	1	1	0.830151	0.933454	0.961147	0.650929	0.538796	0.215871	0.0987909	1	1.04071	1.21227	1.06712	0.745026	0.569177	0.450744	0	14.1668	-0.104517	0	0.935037	15.4409	-0.104402	0	0.898572	Yes	Yes	Yes	Yes	3	3	0.99202	0.991285	0.98147	0.753257	0.531663	0.372475	0.239191	0.169687	0.99202	0.787103	0.773579	0.691231	0.468562	0.320259	0.211941	0.120801
O76070	SNCG	10	10	1	1.05064	1.0921	1.08393	0.902036	0.996272	1.10328	1.00321	1	1.0044	1.05402	0.981182	0.866384	0.847982	0.828943	0.74121			1.06614	0.0302008		-0.0233845	0.668019	0.92181	Yes	Yes			11	11	0.99202	0.941246	0.929424	0.867885	0.908593	0.904119	0.827103	0.813251	0.99202	1.03144	1.02652	0.918353	1.03172	0.973227	0.873874	0.771064
O76071	CIAO1	6	6	1	0.948106	1.1476	1.05287	0.753095	0.565689	0.395022	0.344847	1	0.943327	0.978897	0.883875	0.696496	0.491841	0.541785	0.353697	15.5848	-0.0949563	0.287204	0.951118	16.3247	-0.0629631	0.191089	0.963788	Yes	Yes	Yes	Yes	7	7	0.99202	0.905801	0.818614	0.760871	0.599952	0.460885	0.357247	0.24288	0.99202	0.93218	0.798288	0.702446	0.633762	0.490748	0.309782	0.213584
O76074	PDE5A	1	1	1	1.05361	1.01558	1.07165	0.86177	1.07235	0.773003	0.404136	1	1.17035	1.11096	1.18127	0.891832	0.849358	0.555477	0.379695	18.3863	-0.834182	0.404135	0.911733	18.9906	-0.0821034	0.0298907	0.863576	Yes	Yes		Yes
O76075	DFFB	6	6	1	1.18652	1.25342	1.16302	0.909711	0.920325	0.777135	0.313963	1	1.0432	1.15996	1.13551	0.937992	0.89365	0.753615	0.344394	19.7128	-0.157777	0	0.782648	19.7641	-0.126871	0	0.887211	Yes	Yes		Yes	7	7	0.99202	1.02241	0.960804	0.948233	0.699405	0.302417	0.115363	0.0553009	0.99202	1.00328	0.983291	0.882905	0.708225	0.297709	0.122302	0.0724588
O76080	ZFAND5	4	4	1	0.897386	0.94184	0.989127	0.791282	0.999403	1.05939	1.08629	1	1.02455	1.0221	1.01395	0.861917	0.853844	0.898274	1.02378			0.966388	0.0160352		-0.0579467	0.909772	0.512875	Yes	Yes			4	4	0.99202	0.978978	0.955686	0.915748	0.828527	0.857477	0.77873	0.814538	0.99202	0.944081	1.01234	0.926286	1.01554	0.892372	0.803906	0.811644
O76083	PDE9A	3	3	1	0.907666	1.06113	1.02816	0.573649	0.365936	0.198896	0.114863	1	0.848362	0.972702	0.913154	0.553755	0.348093	0.184734	0.111404	12.9874	-0.13633	0.0922618	0.976962	12.7685	-0.113634	0	0.972607	Yes	Yes	Yes	Yes	1	1	0.99202	0.902996	0.867829	0.676476	0.584608	0.349633	0.306787	0.192294	0.99202	0.980135	0.982212	0.658241	0.520198	0.400425	0.314101	0.202509
O76094	SRP72	39	39	1	0.989011	0.982622	0.877969	0.412297	0.135632	0.063327	0.0505741	1	0.983601	0.988265	0.872385	0.418767	0.145948	0.0655302	0.0423894	11.3903	-0.177943	0.0130943	0.99952	11.4248	-0.170171	0.00188586	0.99965	Yes	Yes	Yes	Yes	31	31	0.99202	0.88574	0.539844	0.300783	0.164694	0.090652	0.0462932	0.0260611	0.99202	0.886302	0.503145	0.311602	0.14282	0.0902763	0.0542953	0.0360007
O77932	DXO	3	3	1	1.02908	1.16907	1.09762	0.871666	0.976254	1.228	0.965437	1	1.10649	1.14169	1.00987	0.71486	0.736966	0.721833	0.695636		0.0104402	1.0766	-0.0510884		-0.284339	0.7172	0.8738	Yes	Yes			2	2	0.99202	1.02315	1.01019	0.78918	0.561885	0.277302	0.159161	0.0930833	0.99202	0.980529	0.912627	0.742344	0.50234	0.223011	0.14613	0.0807275
O94760	DDAH1	21	21	1	1.0607	1.07634	1.04523	0.884351	0.939825	1.02322	0.775816	1	1.00008	1.07085	1.00272	0.887646	0.831672	0.787233	0.61786		0	0	0.610129		-0.0331808	0	0.933835	Yes	Yes			20	20	0.99202	0.955456	0.92671	0.93343	0.959681	0.906221	0.822262	0.669014	0.99202	0.950915	0.981111	0.882529	0.995372	0.892536	0.755261	0.517417
O94761	RECQL4	10	10	1	1.01527	1.03832	0.93156	0.594778	0.337843	0.202476	0.126111	1	1.00669	1.0965	0.925812	0.57641	0.313991	0.180144	0.12025	12.9629	-0.120078	0.0444079	0.997807	12.7288	-0.128042	0.0526655	0.991374	Yes	Yes	Yes	Yes	6	6	0.99202	0.879392	0.702261	0.503213	0.331797	0.253638	0.190842	0.139453	0.99202	0.920426	0.673998	0.537484	0.338538	0.233302	0.191067	0.147865
O94762	RECQL5	12	12	1	1.18431	1.12438	0.99697	0.546778	0.246094	0.142573	0.0985111	1	1.01333	1.07725	0.968941	0.510234	0.238006	0.157821	0.110348	12.3639	-0.181272	0.0979687	0.965323	12.1295	-0.180292	0.112495	0.99424	Yes	Yes	Yes	Yes	10	10	0.99202	0.906487	0.821692	0.564432	0.331568	0.210815	0.152904	0.122324	0.99202	0.907403	0.759463	0.570486	0.336061	0.225747	0.14969	0.128191
O94763-4	URI1	2	2	1	1.16184	1.16879	1.1493	0.953069	0.607046	0.291443	0.20211	1	1.012	0.923883	1.03141	0.613432	0.423696	0.229365	0.197649	15.7337	-0.156451	0.165614	0.930114	13.3924	-0.126916	0.157912	0.980601	Yes	Yes	Yes	Yes	2	2	0.99202	0.838191	0.983841	0.708083	0.716202	0.424456	0.458422	0.316682	0.99202	0.760895	0.751583	0.656639	0.440776	0.472331	0.268671	0.120491
O94763	URI1	11	11	1	1.0412	0.984682	0.899775	0.65939	0.482947	0.259591	0.124337	1	0.99527	1.02958	0.951343	0.675788	0.4543	0.235645	0.122004	13.9706	-0.0967972	0	0.989393	13.9921	-0.105729	0	0.99563	Yes	Yes	Yes	Yes	16	16	0.99202	0.92117	0.873312	0.82478	0.747244	0.658657	0.583228	0.521565	0.99202	0.908528	0.920973	0.833925	0.917237	0.811201	0.664837	0.540863
O94766	B3GAT3	6	6	1	1.02136	0.976615	0.950615	0.710938	0.47361	0.290235	0.137677	1	0.978837	1.0439	0.951772	0.678053	0.440065	0.266752	0.130308	14.409	-0.0990425	0	0.99594	14.0314	-0.102385	0	0.995016	Yes	Yes	Yes	Yes	4	4	0.99202	0.947624	0.878843	0.686776	0.445916	0.284651	0.208457	0.122353	0.99202	0.928844	0.825856	0.679504	0.426535	0.265265	0.192918	0.134097
O94768	STK17B	2	2	1	0.849699	0.977004	0.957316	0.701668	0.437872	0.252221	0.0944589	1	0.979302	1.09401	0.866096	0.636485	0.45782	0.127189	0.0892929	14.0657	-0.110146	0	0.969839	13.3684	-0.113089	0	0.972243	Yes	Yes	Yes	Yes	1	1	0.99202	1.03594	0.883349	0.911455	0.478639	0.381162	0.372728	0.133938	0.99202	0.820546	0.655895	0.585661	0.535215	0.346554	0.213873	0.148074
O94776	MTA2	32	32	1	0.997837	1.02034	0.982747	0.751837	0.655576	0.41959	0.0886149	1	1.00746	0.98986	0.933681	0.741097	0.582816	0.390382	0.116996	15.933	-0.0963803	0	0.954451	15.3565	-0.0904058	0	0.973746	Yes	Yes	Yes	Yes	33	33	0.99202	0.936031	0.803753	0.547276	0.278181	0.105851	0.060642	0.0353775	0.99202	0.938344	0.798213	0.571019	0.271005	0.112346	0.0683726	0.0437906
O94782	USP1	6	6	1	1.00852	1.02545	0.944433	0.638347	0.415255	0.224587	0.108542	1	1.01824	1.03937	0.922254	0.678455	0.3805	0.205049	0.100521	13.5909	-0.108589	0	0.996263	13.5762	-0.115556	0	0.997123	Yes	Yes	Yes	Yes	7	7	0.99202	0.951023	0.937425	0.767316	0.660066	0.507554	0.372833	0.257093	0.99202	0.951004	0.911564	0.804496	0.636996	0.487699	0.350284	0.246496
O94804	STK10	24	24	1	1.10643	1.10078	1.06109	0.847856	0.850591	0.775504	0.13153	1	1.00332	1.05944	1.00988	0.785036	0.727563	0.631566	0.151485	19.0767	-0.263469	0	0.90303	17.6554	-0.0856451	0	0.891708	Yes	Yes	Yes	Yes	20	20	0.99202	0.920523	0.854535	0.369104	0.193727	0.121089	0.0714786	0.0374864	0.99202	1.00069	0.897014	0.352233	0.152224	0.107011	0.0763549	0.0453867
O94808	GFPT2	9	9	1	1.09347	1.07935	0.994896	0.550857	0.26722	0.0969776	0.0484714	1	1.01746	1.02676	0.976233	0.540353	0.247478	0.105806	0.0574852	12.5293	-0.158138	0.0140273	0.986512	12.3917	-0.16211	0.0302495	0.997658	Yes	Yes	Yes	Yes	8	8	0.99202	0.915235	0.840231	0.601039	0.396958	0.266248	0.154966	0.105531	0.99202	0.92159	0.775076	0.592471	0.361015	0.234415	0.156813	0.0781637
O94811	TPPP	1	1	1	0.876232	0.95516	0.89663	0.739508	0.908746	0.912225	1.02463	1	0.953997	0.984278	0.991408	0.828094	0.772479	0.777567	0.955318		-0.172915	0.896349	-0.0605989		-0.403552	0.833365	0.642441	Yes	Yes			1	1	0.99202	1.01364	0.956484	0.971259	0.756525	0.8019	0.706194	0.661838	0.99202	1.02204	1.14001	1.09436	1.08626	0.975788	0.875462	0.671671
O94812	BAIAP3	2	2	1	1.09418	1.03026	1.01069	0.505063	0.210707	0.0754571	0.0549037	1	1.03717	1.02787	1.02286	0.597348	0.277962	0.113278	0.090914	12.1409	-0.197728	0.0513128	0.990409	12.7351	-0.168687	0.064841	0.994786	Yes	Yes	Yes	Yes
O94817	ATG12	5	5	1	0.916935	1.01396	1.05795	0.752705	0.378156	0.128793	0.0237773	1	1.06384	1.00885	1.0096	0.742166	0.354135	0.1097	0.0365118	13.8646	-0.155828	0	0.988086	13.6922	-0.157476	0	0.995286	Yes	Yes	Yes	Yes	6	6	0.99202	0.985801	0.893451	0.840797	0.797025	0.540561	0.252374	0.166922	0.99202	0.95981	0.931956	0.862732	0.813613	0.56093	0.253563	0.174116
O94819	KBTBD11	3	3	1	1.05257	1.02294	1.12981	0.801741	0.701375	0.461771	0.167586	1	1.03046	1.14854	1.16722	0.86832	0.743722	0.436624	0.187796	16.8031	-0.0953529	0	0.945045	17.1086	-0.108212	0	0.930308	Yes	Yes	Yes	Yes	2	2	0.99202	1.05855	0.952351	0.823725	0.77385	0.411237	0.275572	0.173398	0.99202	0.902158	1.00887	0.734675	0.669677	0.458941	0.235471	0.0930732
O94826	TOMM70A	55	55	1	1.00755	1.03389	0.998265	0.762	0.528405	0.195372	0.054982	1	0.988574	1.01119	0.950313	0.74729	0.502775	0.208047	0.0656793	14.6428	-0.127881	0	0.988008	14.4474	-0.120945	0	0.990652	Yes	Yes	Yes	Yes	60	60	0.99202	0.972204	0.896418	0.703069	0.462611	0.285878	0.185361	0.11121	0.99202	0.951861	0.940184	0.705152	0.470168	0.29194	0.196594	0.11397
O94827-6	PLEKHG5	2	2	1	0.975239	0.971363	0.916018	0.613533	0.455813	0.273099	0.205162	1	0.770226	0.953208	0.967863	0.529852	0.458581	0.241064	0.111235	13.8229	-0.0884368	0	0.994912	13.2995	-0.101641	0	0.907454	Yes	Yes	Yes	Yes	2	2	0.99202	0.844646	0.877954	0.54685	0.425304	0.381406	0.158201	0.132922	0.99202	0.979832	0.796904	0.65498	0.533782	0.311365	0.247738	0.214778
O94829	IPO13	5	5	1	0.99705	1.09849	1.01301	0.683268	0.437112	0.217065	0.132433	1	1.02109	1.04832	0.964753	0.672561	0.381767	0.174654	0.117069	14.01	-0.112892	0.00644987	0.985843	13.583	-0.120411	0	0.996591	Yes	Yes	Yes	Yes	5	5	0.99202	0.933972	0.86714	0.654365	0.446303	0.325253	0.231243	0.170245	0.99202	0.940829	0.829928	0.671688	0.492169	0.34518	0.244942	0.146199
O94830	DDHD2	11	11	1	1.01291	1.04905	0.980906	0.671486	0.392223	0.191031	0.0791926	1	0.974136	1.01742	0.990347	0.702335	0.387557	0.167796	0.064968	13.6371	-0.122905	0	0.995359	13.724	-0.132135	0	0.997253	Yes	Yes	Yes	Yes	7	7	0.99202	0.938036	0.919235	0.751743	0.546202	0.391592	0.226055	0.153721	0.99202	0.963923	0.958329	0.785813	0.558769	0.395571	0.248338	0.153773
O94832	MYO1D	19	19	1	1.053	1.08915	0.950123	0.477234	0.23189	0.163318	0.11554	1	1.05243	1.09651	0.930589	0.464591	0.237091	0.152992	0.10857	11.9165	-0.181161	0.11985	0.99094	11.8431	-0.170664	0.104548	0.989957	Yes	Yes	Yes	Yes	8	8	0.99202	0.953903	0.858328	0.525248	0.311804	0.21195	0.13254	0.0866122	0.99202	1.00595	0.796622	0.573647	0.291992	0.190252	0.119497	0.0933472
O94842	TOX4	11	11	1	0.937641	1.02152	0.860539	0.531672	0.331271	0.266418	0.221449	1	0.956549	0.905385	0.811048	0.494104	0.316713	0.216178	0.149961	12.3214	-0.119495	0.175133	0.994448	12.0278	-0.10136	0	0.990519	Yes	Yes	Yes	Yes	14	14	0.99202	0.892516	0.853301	0.742635	0.568503	0.481369	0.433632	0.47331	0.99202	0.974284	0.924492	0.76142	0.631179	0.53103	0.441606	0.445746
O94851-4	MICAL2	6	6	1	1.14463	1.16986	0.983236	0.620982	0.367366	0.196353	0.0961367	1	0.967921	1.06897	0.985882	0.563922	0.335355	0.21555	0.102741	13.3205	-0.121549	0.0107013	0.959384	12.8199	-0.134158	0.0832947	0.988433	Yes	Yes	Yes	Yes	4	4	0.99202	0.975256	0.732391	0.439857	0.27623	0.164484	0.0998326	0.0737469	0.99202	0.875442	0.6652	0.471176	0.276336	0.158725	0.116402	0.0624775
O94854	KIAA0754	4	4	1	1.05487	1.07024	0.981292	0.584185	0.37778	0.226044	0.151822	1	1.05356	1.06442	0.985802	0.606274	0.30855	0.207144	0.127357	13.0684	-0.125309	0.110945	0.987566	12.8726	-0.14765	0.113431	0.992185	Yes	Yes	Yes	Yes	3	3	0.99202	0.957023	0.826444	0.574714	0.397113	0.282269	0.27695	0.135993	0.99202	0.928797	0.782842	0.584108	0.472954	0.248982	0.188142	0.146159
O94855-2	SEC24D	25	25	1	0.964029	0.996628	0.968318	0.833228	0.726168	0.347011	0.130867	1	1.00411	1.04726	1.00634	0.82035	0.712146	0.365602	0.139169	16.4695	-0.120245	0	0.976877	16.4334	-0.111321	0	0.976978	Yes	Yes	Yes	Yes	22	22	0.99202	0.965811	0.914582	0.798931	0.557249	0.295676	0.186752	0.119651	0.99202	0.991297	0.965489	0.784404	0.588239	0.291651	0.183274	0.123468
O94864	SUPT7L	3	3	1	0.857044	0.942241	0.955965	0.645124	0.724983	0.739483	0.495877	1	0.994875	0.795908	0.832401	0.621599	0.557943	0.500289	0.307786		-0.0349253	0	0.696656	15.8653	-0.0564445	0	0.917579	Yes	Yes		Yes	5	5	0.99202	0.905354	0.885051	0.770335	0.789076	0.800987	0.732625	0.755657	0.99202	0.901998	0.806693	0.779745	0.726245	0.820225	0.664142	0.649798
O94868	FCHSD2	2	2	1	0.999382	1.25686	1.13755	0.799152	0.728817	0.569624	0.276193	1	1.08492	1.22262	1.09201	0.925961	0.666403	0.455354	0.487344	17.9543	-0.0747476	0	0.848118	17.7538	-0.113811	0.445949	0.886266	Yes	Yes	Yes		3	3	0.99202	1.02953	0.853283	0.603397	0.448892	0.304476	0.193935	0.159515	0.99202	1.01043	0.88309	0.678509	0.461932	0.299513	0.226168	0.137276
O94874	UFL1	44	44	1	0.981353	0.960996	0.877565	0.474282	0.169975	0.0523382	0.0355321	1	1.01992	1.0156	0.934772	0.52659	0.187326	0.0725531	0.0440999	11.7213	-0.164966	0	0.99773	12.1533	-0.169962	0.00379691	0.99949	Yes	Yes	Yes	Yes	42	42	0.99202	0.857912	0.688498	0.459839	0.304667	0.214388	0.143718	0.0871585	0.99202	0.874917	0.650053	0.486117	0.295713	0.202998	0.144532	0.0855878
O94876	TMCC1	4	4	1	0.977878	0.986167	0.810512	0.564814	0.272636	0.22832	0.137892	1	1.07525	1.10628	0.946094	0.558044	0.384356	0.178531	0.103653	12.3142	-0.105124	0	0.995016	12.9941	-0.115115	0	0.979781	Yes	Yes	Yes	Yes	2	2	0.99202	1.0257	0.775109	0.661534	0.407566	0.30963	0.244627	0.179977	0.99202	0.80856	0.802109	0.790609	0.413923	0.321823	0.187525	0.167607
O94885	SASH1	4	4	1	1.07488	1.06075	0.965864	0.729572	0.636261	0.398425	0.195847	1	1.07185	1.09739	0.937246	0.766577	0.594415	0.400833	0.196141	15.8753	-0.0813032	0	0.96765	15.7864	-0.0828897	0	0.971357	Yes	Yes	Yes	Yes	5	5	0.99202	1.04839	0.962676	0.817905	0.696344	0.486885	0.334146	0.194388	0.99202	0.946408	0.990416	0.854787	0.674178	0.472527	0.342366	0.200656
O94886	TMEM63A	1	1	1	0.926011	1.03845	0.917287	0.794175	0.72663	0.559448	0.44959	1	1.04216	1.01697	0.968147	0.88613	0.655771	0.527042	0.357846	19.909	-0.0476159	0	0.964034	18.0194	-0.0660929	0	0.991689	Yes	Yes	Yes	Yes	2	2	0.99202	0.889274	0.776774	0.683837	0.570257	0.526674	0.394549	0.359068	0.99202	0.972869	1.03016	0.798015	0.589025	0.426988	0.530371	0.310649
O94887	FARP2	5	5	1	1.0774	1.06763	0.907173	0.472882	0.236836	0.133974	0.0883385	1	1.04639	1.01483	0.868589	0.4471	0.243488	0.118273	0.0718377	11.8862	-0.154646	0.0611694	0.991472	11.714	-0.141478	0.0192384	0.997181	Yes	Yes	Yes	Yes	6	6	0.99202	0.789058	0.591176	0.449064	0.277755	0.173872	0.113961	0.0661934	0.99202	0.78453	0.508704	0.403413	0.244101	0.169032	0.120656	0.0727373
O94888	UBXN7	16	16	1	1.04045	1.01121	1.01906	0.829881	0.912996	0.979178	0.699165	1	1.0114	1.02641	1.00767	0.835064	0.80837	0.780719	0.534071		-0.0192365	0	0.546029		-0.0376305	0	0.908697	Yes	Yes			18	18	0.99202	1.02038	0.952814	0.876234	0.807395	0.709579	0.664982	0.586025	0.99202	1.01441	1.06363	0.890725	0.881165	0.774135	0.653503	0.562769
O94889	KLHL18	4	4	1	1.08509	1.11882	1.169	0.764927	0.594526	0.344939	0.175403	1	1.01008	1.11414	1.05949	0.822173	0.61019	0.354722	0.147525	15.6843	-0.0987288	0	0.935919	15.8723	-0.104223	0	0.973946	Yes	Yes	Yes	Yes	1	1	0.99202	3.05825	0.76049	0.586734	0.792883	0.284264	0.152685	0.269813	0.99202	1.21291	1.69628	1.01562	0.562932	0.333114	1.26167	0.212384
O94898	LRIG2	4	4	1	1.14292	1.15122	1.05913	0.649786	0.453339	0.315167	0.174815	1	0.900131	1.02262	0.970333	0.610429	0.383369	0.295155	0.170019	14.0267	-0.111038	0.134155	0.943942	13.3155	-0.116716	0.139864	0.981791	Yes	Yes	Yes	Yes	5	5	0.99202	0.938451	0.853636	0.692932	0.629244	0.45331	0.420724	0.327789	0.99202	0.890622	0.879648	0.779099	0.649835	0.492623	0.417026	0.315061
O94901-9	SUN1	3	3	1	1.10203	1.17529	0.982356	0.630315	0.460002	0.265874	0.149922	1	0.991535	0.972053	0.916984	0.602429	0.342189	0.196758	0.113247	13.9808	-0.0993506	0	0.955327	13.0269	-0.113813	0	0.999045	Yes	Yes	Yes	Yes	5	5	0.99202	0.88684	0.843237	0.659088	0.40277	0.272884	0.204001	0.183204	0.99202	0.868914	0.75373	0.628946	0.453669	0.309748	0.238956	0.172553
O94903	PROSC	24	24	1	0.951177	0.981086	0.939953	0.76573	0.69311	0.426311	0.113567	1	1.01222	1.01417	0.964469	0.819672	0.71098	0.453895	0.146238	16.2622	-0.0951437	0	0.944711	16.7701	-0.0994186	0	0.96849	Yes	Yes	Yes	Yes	20	20	0.99202	1.00831	0.907047	0.768671	0.55484	0.379359	0.264704	0.202539	0.99202	0.982006	0.92846	0.777159	0.57366	0.367742	0.272436	0.178558
O94905	ERLIN2	13	13	1	0.93379	0.92398	0.816312	0.419925	0.144494	0.245495	0.119512	1	1.00944	0.957025	0.888387	0.434345	0.167087	0.0925597	0.110552	11.1182	-0.159991	0.121435	0.977383	11.5036	-0.177494	0.0669063	0.997643	Yes	Yes	Yes	Yes	9	9	0.99202	0.751851	0.614795	0.344361	0.206396	0.124438	0.0793858	0.0454754	0.99202	0.953095	0.504708	0.418829	0.192795	0.129003	0.0927869	0.0566057
O94906	PRPF6	30	30	1	1.10494	1.08202	0.857948	0.347909	0.107782	0.0705115	0.0417811	1	0.999842	0.987122	0.8249	0.345421	0.118332	0.0590653	0.0401206	11.0204	-0.195769	0.0256418	0.988706	10.9178	-0.179745	0.00821491	0.999871	Yes	Yes	Yes	Yes	30	30	0.99202	0.805426	0.63442	0.390668	0.210158	0.137879	0.0899969	0.0661669	0.99202	0.91055	0.561323	0.403137	0.196947	0.141508	0.104803	0.0735565
O94910	LPHN1	3	3	1	1.09551	1.01695	0.960276	0.668433	0.407922	0.182805	0.0387129	1	0.953792	0.921803	0.963201	0.604608	0.283983	0.11121	0.0287853	13.6076	-0.125847	0	0.986296	12.8066	-0.149816	0	0.991656	Yes	Yes	Yes	Yes	3	3	0.99202	0.936919	0.866526	0.678465	0.566443	0.41555	0.311706	0.217431	0.99202	0.990415	0.810367	0.666573	0.440801	0.339572	0.279886	0.220043
O94913	PCF11	21	21	1	1.01028	1.02955	0.943039	0.557433	0.285893	0.191447	0.153898	1	1.02993	1.04732	0.966878	0.562827	0.27955	0.186588	0.152755	12.4629	-0.149716	0.128049	0.998973	12.475	-0.163125	0.13935	0.996892	Yes	Yes	Yes	Yes	21	21	0.99202	0.984332	0.932588	0.79894	0.604977	0.410226	0.229531	0.133523	0.99202	0.943372	0.927398	0.821756	0.615343	0.409816	0.225176	0.130859
O94915	FRYL	30	30	1	0.949583	0.927324	0.819045	0.42467	0.200278	0.158377	0.132917	1	1.00511	1.02411	0.893526	0.475244	0.218587	0.171636	0.138615	11.2651	-0.1477	0.0861702	0.992475	11.7668	-0.161052	0.114637	0.999143	Yes	Yes	Yes	Yes	21	21	0.99202	0.775976	0.597864	0.339191	0.165906	0.116799	0.0774771	0.0480966	0.99202	0.973933	0.536741	0.389763	0.185056	0.132527	0.0918623	0.0593492
O94916-4	NFAT5	5	5	1	0.992944	1.06561	1.0025	0.644152	0.370813	0.151521	0.0350148	1	0.993403	1.01985	0.973902	0.679786	0.340489	0.158469	0.0478453	13.3621	-0.135807	0	0.990697	13.4117	-0.138067	0	0.99846	Yes	Yes	Yes	Yes	13	13	0.99202	0.946441	0.895583	0.798135	0.662692	0.465333	0.394939	0.297124	0.99202	0.975812	0.971447	0.807983	0.637248	0.474961	0.372678	0.272055
O94919	ENDOD1	15	15	1	1.27121	1.38216	1.19319	0.887453	0.741647	0.585457	0.367313	1	0.972766	1.06254	1.01717	0.811216	0.584788	0.425089	0.26868	18.8109	-0.0713217	0	0.696528	16.298	-0.0809515	0.0404714	0.988015	Yes	Yes		Yes	16	16	0.99202	0.962293	0.931279	0.768295	0.700085	0.595532	0.475142	0.298425	0.99202	0.973455	0.909222	0.827216	0.738302	0.629121	0.468777	0.277104
O94923	GLCE	8	8	1	1.08126	1.099	1.05654	0.67119	0.402869	0.141481	0.05881	1	1.02791	1.02828	0.975464	0.680082	0.37952	0.160002	0.0730481	13.6534	-0.1362	0	0.977759	13.5676	-0.129908	0	0.997068	Yes	Yes	Yes	Yes	8	8	0.99202	0.995779	0.912807	0.802582	0.556384	0.331337	0.223021	0.144182	0.99202	0.964171	0.876951	0.739083	0.530406	0.35424	0.212172	0.157055
O94925-3	GLS	7	7	1	0.983174	0.891775	0.790715	0.501374	0.261293	0.112366	0.0766633	1	1.02773	1.01486	0.87229	0.562077	0.245934	0.12021	0.0499286	11.668	-0.122572	0	0.986939	12.3129	-0.137881	0	0.997425	Yes	Yes	Yes	Yes	4	4	0.99202	1.03376	0.919714	0.691023	0.50926	0.339718	0.284793	0.202572	0.99202	0.898243	0.76616	0.567172	0.380244	0.261471	0.194766	0.145637
O94925	GLS	27	27	1	1.02997	1.09052	1.00953	0.646752	0.33734	0.172627	0.0951468	1	1.01132	1.07318	0.956096	0.646494	0.326415	0.158469	0.0942997	13.2596	-0.138989	0.0452525	0.989896	13.1947	-0.131322	0.0108441	0.995202	Yes	Yes	Yes	Yes	26	26	0.99202	0.912635	0.781058	0.569194	0.387778	0.244569	0.169992	0.0940668	0.99202	0.918958	0.726384	0.567227	0.359	0.230754	0.161159	0.0935833
O94927	HAUS5	16	16	1	1.12432	1.11319	1.05771	0.69759	0.469867	0.445605	0.246749	1	1.01038	1.06016	0.984489	0.689125	0.396435	0.312546	0.180326	14.5465	-0.107537	0.271859	0.941438	13.8523	-0.115599	0.140853	0.991711	Yes	Yes	Yes	Yes	18	18	0.99202	0.929114	0.766178	0.580043	0.307499	0.156282	0.0991219	0.0675646	0.99202	0.928417	0.660765	0.524327	0.257384	0.142972	0.0912238	0.0571152
O94941	UBOX5	3	3	1	1.009	1.08353	1.07042	0.757629	0.85634	0.708326	0.286132	1	1.00308	1.09604	0.927764	0.821285	0.626785	0.451094	0.241254	19.2244	-0.105726	0	0.844078	16.5636	-0.0781172	0	0.976062	Yes	Yes	Yes	Yes
O94952	FBXO21	5	5	1	0.991786	1.11659	1.03983	0.684297	0.377618	0.249262	0.174123	1	1.0394	1.08957	0.949036	0.69488	0.379611	0.176163	0.0837266	13.5474	-0.140376	0.157819	0.981922	13.6397	-0.125634	0	0.991079	Yes	Yes	Yes	Yes	2	2	0.99202	0.865923	0.851413	0.611434	0.483461	0.316351	0.28669	0.201516	0.99202	0.88096	0.749179	0.645412	0.449599	0.355666	0.179266	0.132451
O94953	KDM4B	6	6	1	1.00764	0.985405	0.954058	0.636704	0.412036	0.197214	0.127773	1	1.00088	1.10696	1.00411	0.645347	0.409475	0.23533	0.136847	13.5512	-0.110324	0	0.996972	13.6701	-0.115469	0.0526402	0.983864	Yes	Yes	Yes	Yes	4	4	0.99202	0.983345	0.813581	0.594437	0.38264	0.238513	0.1829	0.144058	0.99202	0.9391	0.839263	0.603065	0.379928	0.241308	0.188167	0.174663
O94955	RHOBTB3	6	6	1	1.1286	1.03817	0.897251	0.580736	0.307835	0.126218	0.085391	1	1.04479	0.986945	0.905705	0.465962	0.239885	0.168632	0.116677	12.6534	-0.128023	0	0.984774	11.8071	-0.158323	0.10353	0.997691	Yes	Yes	Yes	Yes	6	6	0.99202	0.846723	0.655734	0.46775	0.32516	0.205999	0.16343	0.103435	0.99202	0.926909	0.654957	0.451148	0.295835	0.19613	0.133908	0.0888313
O94964-2	SOGA1	14	14	1	1.02152	1.0227	0.923023	0.487211	0.294118	0.156871	0.117818	1	1.00709	1.04003	0.909532	0.481075	0.235119	0.167828	0.109633	12.1074	-0.14445	0.0879542	0.996695	11.8992	-0.157285	0.0947288	0.998114	Yes	Yes	Yes	Yes	7	7	0.99202	0.882321	0.690345	0.434007	0.251635	0.167491	0.111731	0.0798	0.99202	0.902842	0.675987	0.445908	0.241953	0.180224	0.13023	0.0781282
O94966-4	USP19	1	1	1	0.983045	1.02649	1.00134	0.710906	0.509804	0.274155	0.101741	1	0.920492	1.13576	0.905325	0.72451	0.476011	0.262606	0.102758	14.5514	-0.106251	0	0.98872	14.3039	-0.104953	0	0.966873	Yes	Yes	Yes	Yes
O94966-5	USP19	32	32	1	0.961678	1.02777	0.980554	0.739285	0.520592	0.241497	0.0781142	1	0.997769	1.04114	0.980983	0.750439	0.513875	0.237475	0.0856318	14.6031	-0.114575	0	0.987979	14.6222	-0.115725	0	0.991403	Yes	Yes	Yes	Yes	34	34	0.99202	0.955877	0.915765	0.797986	0.63742	0.452324	0.307944	0.206536	0.99202	0.98308	0.917658	0.799996	0.659186	0.434663	0.303132	0.19981
O94967	WDR47	7	7	1	1.07702	1.11534	1.02439	0.823123	0.724951	0.499754	0.357102	1	1.04332	1.07062	1.04649	0.807151	0.683224	0.45449	0.265092	18.0535	-0.0670338	0	0.953704	17.0024	-0.0794422	0	0.973351	Yes	Yes	Yes	Yes	13	13	0.99202	1.01625	0.970947	0.884283	0.754504	0.642278	0.47937	0.273837	0.99202	0.940609	0.905675	0.790669	0.761078	0.6099	0.410053	0.250437
O94972	TRIM37	1	1	1	1.04368	1.0514	0.99671	0.56167	0.287233	0.162772	0.204485	1	0.980137	1.01568	0.85183	0.482286	0.25724	0.196931	0.101217	12.4123	-0.19063	0.179453	0.993305	11.8869	-0.128401	0.0518855	0.997879	Yes	Yes	Yes	Yes	1	1	0.99202	1.02894	1.01102	0.704397	0.592363	0.473409	0.371577	0.325311	0.99202	1.0724	0.885207	0.718151	0.544049	0.457907	0.354609	0.328607
O94973-2	AP2A2	19	19	1	1.01311	1.09299	1.07823	0.807132	0.612637	0.240734	0.0560067	1	0.988919	1.03077	0.991292	0.75654	0.536197	0.215668	0.0524222	15.4045	-0.133435	0	0.97218	14.69	-0.123953	0	0.986448	Yes	Yes	Yes	Yes	24	24	0.99202	0.974456	0.919858	0.765379	0.556109	0.319451	0.193828	0.114216	0.99202	0.932987	0.887413	0.725391	0.561497	0.3054	0.181296	0.111366
O94979-8	SEC31A	45	45	1	1.0401	1.04081	1.02765	0.737949	0.455595	0.175125	0.0827071	1	1.01029	1.03723	1.00982	0.777459	0.472775	0.198677	0.0888593	14.2104	-0.128657	0	0.991632	14.4916	-0.1275	0	0.996048	Yes	Yes	Yes	Yes	49	49	0.99202	0.974581	0.89037	0.813115	0.642327	0.468883	0.299916	0.153317	0.99202	0.953773	0.888653	0.784191	0.65561	0.444505	0.2902	0.157621
O94985-2	CLSTN1	9	9	1	0.980166	0.997657	0.968548	0.737323	0.625455	0.374523	0.144773	1	1.00661	1.06637	1.06594	0.785483	0.625641	0.362379	0.139102	15.6186	-0.0899411	0	0.974672	15.8432	-0.100902	0	0.973822	Yes	Yes	Yes	Yes
O94992	HEXIM1	11	11	1	0.979056	0.944695	0.959561	0.811494	0.848237	0.963863	0.998975	1	1.01931	0.987162	0.951394	0.826002	0.795211	0.807598	0.78863		-0.0342818	0.915135	0.218793		-0.0554081	0.794284	0.989802	Yes	Yes			18	18	0.99202	1.00526	0.924093	0.861494	0.854718	0.770058	0.784739	0.808264	0.99202	0.904683	0.909685	0.885838	0.982301	0.849901	0.816345	0.76545
O95049-2	TJP3	5	5	1	1.03693	1.07128	0.984533	0.744569	0.49381	0.28316	0.11458	1	0.988458	0.99918	0.967352	0.669811	0.401567	0.194761	0.106116	14.6556	-0.106546	0	0.989355	13.6735	-0.11706	0	0.998378	Yes	Yes	Yes	Yes	6	6	0.99202	1.01956	0.930126	0.792137	0.531586	0.356406	0.282212	0.205535	0.99202	0.939361	0.880826	0.733707	0.529927	0.373094	0.290576	0.222445
O95057	DIRAS1	7	7	1	1.01702	1.06845	0.977579	0.637474	0.313984	0.158414	0.0859167	1	0.970338	1.04203	0.886769	0.565981	0.278315	0.123484	0.068379	13.1094	-0.139069	0.0274808	0.995233	12.462	-0.132684	0	0.996779	Yes	Yes	Yes	Yes	8	8	0.99202	0.946382	0.788447	0.648671	0.455357	0.310362	0.222935	0.133906	0.99202	0.938457	0.82299	0.645385	0.441166	0.303958	0.222137	0.14816
O95059	RPP14	2	2	1	0.847546	0.896723	0.841029	0.624637	0.617088	0.486932	0.251795	1	1.07334	1.09695	1.09205	0.689786	0.569009	0.509844	0.290558	15.7082	-0.0597542	0	0.872395	16.0019	-0.0810329	0.25051	0.925941	Yes	Yes	Yes	Yes	3	3	0.99202	0.982817	0.955055	0.898777	0.849606	0.778195	0.683724	0.328725	0.99202	1.07259	1.02648	0.929121	0.885691	0.740177	0.624386	0.306436
O95067	CCNB2	9	9	1	1.11648	1.11042	0.92451	0.546001	0.271317	0.156993	0.117104	1	0.9875	1.02033	0.848039	0.492985	0.220348	0.109735	0.0631078	12.3832	-0.144102	0.0729829	0.980124	11.8265	-0.138484	0	0.998946	Yes	Yes	Yes	Yes	8	8	0.99202	0.90894	0.745742	0.457102	0.276928	0.175318	0.108898	0.0645556	0.99202	0.908137	0.674178	0.443118	0.227686	0.157024	0.113835	0.0830706
O95070	YIF1A	2	2	1	1.04422	0.961915	0.909106	0.700742	0.408672	0.316899	0.126979	1	0.852653	0.964177	0.947196	0.714873	0.45438	0.284478	0.107722	14.0401	-0.0973109	0	0.989296	14.2779	-0.104181	0	0.967013	Yes	Yes	Yes	Yes	2	2	0.99202	0.863245	0.888589	0.640806	0.548642	0.402853	0.286669	0.160226	0.99202	0.914811	0.798916	0.688909	0.50279	0.353974	0.252083	0.185022
O95071	UBR5	68	68	1	1.00111	1.03769	0.950519	0.558614	0.230494	0.0874971	0.0497437	1	1.01025	1.01568	0.954228	0.564405	0.227269	0.091486	0.0455303	12.4257	-0.158688	0.00184919	0.998742	12.4536	-0.160124	0.00208356	0.999617	Yes	Yes	Yes	Yes	71	71	0.99202	0.896583	0.842307	0.685595	0.544307	0.412718	0.257054	0.0985531	0.99202	1.02168	0.774237	0.736946	0.581744	0.427467	0.26501	0.117603
O95081	AGFG2	3	3	1	0.960014	0.945473	0.975374	0.785186	0.862094	0.904221	1.03154	1	0.931262	1.03452	0.988937	0.890165	1.00788	0.864591	0.733322		-0.0296687	0.908457	0.141443			0	0.727084	Yes	Yes			3	3	0.99202	0.930083	1.00142	0.763235	0.533803	0.319102	0.238308	0.101595	0.99202	1.1061	0.973355	0.826863	0.576502	0.300967	0.192148	0.0743307
O95104	SCAF4	7	7	1	1.0555	1.13319	1.11599	0.760818	0.561003	0.410454	0.217444	1	0.958452	0.99027	0.950844	0.650554	0.433248	0.300984	0.187615	15.7961	-0.0885663	0.0429392	0.944999	13.9552	-0.0965095	0.0561308	0.995253	Yes	Yes	Yes	Yes	15	15	0.99202	0.927555	0.928514	0.725149	0.529008	0.387107	0.259706	0.192359	0.99202	1.01814	0.914121	0.721551	0.513667	0.365273	0.250477	0.172486
O95139	NDUFB6	12	12	1	0.828061	1.0022	0.959777	0.649423	0.462941	0.194004	0.0149884	1	0.975561	0.918377	0.977549	0.74742	0.45639	0.20516	0.0440254	13.7209	-0.120875	0	0.951524	14.245	-0.127981	0	0.986837	Yes	Yes	Yes	Yes	13	13	0.99202	0.952579	0.869984	0.729834	0.491935	0.329042	0.236713	0.156508	0.99202	0.940404	0.868026	0.738414	0.562131	0.380554	0.265278	0.175833
O95140	MFN2	15	15	1	1.0947	1.09191	0.976218	0.542233	0.216728	0.0993684	0.055685	1	1.02679	1.02845	0.93982	0.521793	0.222624	0.0980972	0.0575865	12.3187	-0.17615	0.0385542	0.987591	12.1995	-0.159906	0.0195266	0.998615	Yes	Yes	Yes	Yes	17	17	0.99202	0.830088	0.663832	0.467206	0.284723	0.172272	0.122563	0.0838994	0.99202	0.842408	0.618582	0.478735	0.303355	0.189078	0.134103	0.0804917
O95147	DUSP14	1	1	1	0.953447	1.0314	1.16104	0.983168	0.895491	1.34003	0.75751	1	0.994219	0.989172	1.03908	0.745401	0.782323	0.541363	0.360487		0.0870243	1.02811	0.0135147	18.5829	-0.0601627	0	0.933158	Yes	Yes		Yes	1	1	0.99202	0.907448	1.03438	0.779289	0.918669	0.685155	0.577493	0.284573	0.99202	0.878471	0.799399	0.730824	0.747502	0.538743	0.462149	0.241244
O95149	SNUPN	6	6	1	0.93166	0.971464	1.01526	0.76136	0.48628	0.255268	0.172865	1	0.956785	0.972774	0.946211	0.724332	0.494964	0.269065	0.167724	14.6664	-0.109869	0.0405295	0.990537	14.5541	-0.0976102	0	0.9948	Yes	Yes	Yes	Yes	4	4	0.99202	0.967662	0.977806	0.742408	0.454574	0.272519	0.204938	0.133245	0.99202	1.03485	1.01775	0.720187	0.402746	0.239053	0.157471	0.127786
O95153-3	BZRAP1	1	1	1	0.949634	0.897704	0.92006	0.506877	0.305405	0.168521	0.0717506	1	0.949019	1.08937	0.988336	0.784314	0.404271	0.206862	0.0666944	12.3694	-0.124567	0	0.98412	14.2132	-0.134164	0	0.989495	Yes	Yes	Yes	Yes
O95155-4	UBE4B	31	31	1	0.953624	1.01538	0.970459	0.638128	0.322837	0.171699	0.0801998	1	0.989723	1.0094	0.929035	0.642655	0.320145	0.12361	0.0794497	13.1785	-0.13138	0.00716592	0.997036	13.0745	-0.134756	0	0.998815	Yes	Yes	Yes	Yes	31	31	0.99202	0.933035	0.863137	0.63523	0.396145	0.237728	0.154411	0.0913107	0.99202	0.951247	0.907611	0.660978	0.398143	0.22759	0.156226	0.0921482
O95158	NXPH4	1	1	1	1.48422	1.32264	1.14328	0.665421	0.498753	0.193422	0.0621195	1	1.1373	1.16016	1.18219	0.861213	0.49096	0.172973	0.0861639	14.1923	-0.123545	0	0.799029	14.8474	-0.152831	0.00962579	0.943675	Yes	Yes		Yes	2	2	0.99202	0.959089	0.868559	0.631857	0.39362	0.259097	0.256778	0.148397	0.99202	0.848999	0.804032	0.581119	0.403747	0.312302	0.20333	0.122393
O95159	ZFPL1	7	7	1	1.22619	1.31418	1.21714	0.842569	0.719753	0.455417	0.157798	1	0.996576	1.10291	1.08108	0.800085	0.601951	0.401616	0.134414	16.9623	-0.106338	0	0.816098	15.9139	-0.0990758	0	0.963692	Yes	Yes	Yes	Yes	7	7	0.99202	0.888471	0.859663	0.78337	0.538849	0.339559	0.232329	0.153307	0.99202	0.925359	0.824151	0.801179	0.702616	0.405524	0.256143	0.176568
O95163	IKBKAP	46	46	1	1.04101	1.08116	1.0455	0.63132	0.275005	0.0918161	0.0527089	1	1.00595	1.05749	0.980356	0.647878	0.280781	0.0952283	0.0519879	12.9393	-0.168692	0.0200556	0.989665	13.0161	-0.15649	0	0.997037	Yes	Yes	Yes	Yes	64	64	0.99202	0.94212	0.858708	0.743762	0.639746	0.376012	0.203632	0.107797	0.99202	0.96623	0.835287	0.743699	0.67221	0.386223	0.205456	0.113977
O95164	UBL3	3	3	1	1.05727	1.15194	1.14697	0.88321	0.968963	1.01249	0.804783	1	1.10522	1.14761	1.04162	0.931194	0.810885	0.728193	0.518561			0.435402	0.377437		-0.0518054	0	0.878283	Yes	Yes			1	1	0.99202	0.833025	1.00226	1.15095	1.14162	0.784261	0.598716	0.230866	0.99202	1.04792	1.05996	0.910661	0.835605	0.607889	0.40944	0.226358
O95166	GABARAP	5	5	1	1.00816	1.00639	1.00747	0.807724	0.864278	0.89973	0.979673	1	1.05373	1.0134	0.988236	0.866889	0.843231	0.83173	0.812489		-0.119094	0.887863	0.636232		-0.0466885	0.82467	0.947998	Yes	Yes
O95167	NDUFA3	5	5	1	1.20723	1.26835	1.27327	0.742869	0.69243	0.689451	0.415618	1	1.09807	1.13919	1.09506	0.926204	0.657124	0.443256	0.342682	20.509	-0.0584602	0.334834	0.672035	16.8669	-0.104672	0.284139	0.944295	Yes	Yes		Yes	6	6	0.99202	0.822201	0.943651	1.15643	0.957937	0.748643	0.508327	0.253548	0.99202	1.07302	0.875936	0.885186	0.615909	0.594623	0.427283	0.28361
O95168	NDUFB4	8	8	1	0.971679	0.968105	0.82309	0.446988	0.219265	0.115713	0.0901703	1	0.994643	0.982986	0.889603	0.508132	0.265291	0.163722	0.0969102	11.511	-0.134426	0.00641872	0.998582	12.1373	-0.13253	0.037756	0.999468	Yes	Yes	Yes	Yes	8	8	0.99202	0.860015	0.708041	0.43367	0.272556	0.175474	0.112061	0.0609078	0.99202	0.865396	0.607676	0.442308	0.254435	0.160657	0.10534	0.074293
O95169	NDUFB8	4	4	1	0.935158	0.991955	0.958898	0.720556	0.685538	0.614592	0.549748	1	0.980152	1.03393	0.953795	0.849001	0.701283	0.561977	0.500958		-0.0626529	0.547069	0.962142	20.7676	-0.052169	0.272481	0.993432	Yes	Yes		Yes	5	5	0.99202	0.941673	1.05251	1.04457	0.908243	0.766729	0.716285	0.550611	0.99202	0.977365	1.06566	0.878089	0.868766	0.721877	0.646598	0.542759
O95171	SCEL	2	2	1	1.06892	0.934998	0.890352	0.693826	0.659547	0.614041	0.338227	1	1.08274	1.03022	1.02649	0.753458	0.718858	0.55761	0.312576	18.5511	-0.049198	0	0.921005	17.9915	-0.0630935	0	0.941846	Yes	Yes	Yes	Yes	2	2	0.99202	0.924332	0.911872	0.646101	0.485914	0.400333	0.241183	0.130572	0.99202	0.971641	0.863567	0.672141	0.5362	0.385773	0.32989	0.143488
O95178	NDUFB2	1	1	1	0.976681	1.02267	0.88389	0.765967	0.655284	0.596576	0.539927	1	1.05964	1.19071	0.984087	0.857378	0.712812	0.475391	0.383031		-0.0468319	0.383787	0.992057	18.018	-0.0683366	0.0725399	0.926978	Yes	Yes		Yes	1	1	0.99202	1.03789	0.879081	0.975662	0.933146	0.775568	0.785089	0.546483	0.99202	0.989088	0.955515	0.791953	0.873262	0.723571	0.651031	0.552278
O95182	NDUFA7	4	4	1	0.963261	0.978019	0.859833	0.695198	0.540397	0.35085	0.326867	1	0.97336	0.925699	0.915883	0.677489	0.48337	0.340346	0.254653	15.2536	-0.0672362	0	0.991484	14.6404	-0.0779873	0	0.991148	Yes	Yes	Yes	Yes	5	5	0.99202	0.998099	0.952859	0.844017	0.852116	0.72505	0.61619	0.58354	0.99202	0.925604	0.953331	0.860297	0.841278	0.664877	0.636725	0.49361
O95196	CSPG5	1	1	1	1.07913	1.07631	1.10193	0.977312	1.07203	1.07037	1.02327	1	0.967081	0.944368	0.862902	0.71333	0.659944	0.718004	0.611333			1.1127	0.209907		-0.0453347	0.570369	0.95089	Yes	Yes
O95197-5	RTN3	1	1	1	1.19161	1.09828	1.27212	0.860712	0.922654	0.924556	0.593054	1	0.914926	1.01524	0.891084	0.803023	0.55121	0.654736	0.217302			0	0.539288	17.1356	-0.0626555	0	0.861713	Yes	Yes		Yes	1	1	0.99202	0.946291	1.07238	0.807109	0.768748	0.988135	0.88101	0.697173	0.99202	0.848417	1.10434	0.752377	1.13294	0.761279	0.70972	0.655145
O95197	RTN3	10	10	1	1.03997	1.11029	1.06581	0.823975	0.747067	0.66187	0.394266	1	1.02816	1.10163	0.98699	0.804345	0.684718	0.544172	0.345707	19.7654	-0.0566958	0	0.915895	18.0745	-0.0619459	0	0.966126	Yes	Yes	Yes	Yes	10	10	0.99202	1.0207	1.02552	0.947516	0.890255	0.823389	0.768744	0.654383	0.99202	0.905201	0.971395	0.816519	0.94478	0.801057	0.704654	0.558371
O95201	ZNF205	1	1	1	0.706345	1.02281	0.847572	0.510896	0.309816	0.161842	0.135002	1	0.787082	0.777406	0.773936	0.547692	0.291681	0.192229	0.0541859	12.1819	-0.116217	0.0225728	0.903401	11.8275	-0.107676	0	0.876543	Yes	Yes	Yes	Yes	1	1	0.99202	0.811748	0.893019	0.850715	0.5558	0.506641	0.432011	0.399656	0.99202	0.908119	0.719655	0.772892	0.847751	0.633702	0.527998	0.488771
O95202	LETM1	46	46	1	0.969906	1.00273	0.979486	0.759639	0.626317	0.340447	0.0685734	1	1.01513	1.06536	0.990378	0.7794	0.608321	0.354408	0.0849484	15.504	-0.106878	0	0.968338	15.5619	-0.105602	0	0.974329	Yes	Yes	Yes	Yes	43	43	0.99202	0.950459	0.855019	0.668212	0.503558	0.346943	0.231285	0.145903	0.99202	0.969299	0.892808	0.677234	0.47607	0.322569	0.225905	0.147641
O95208	EPN2	7	7	1	1.09499	1.07418	1.026	0.818116	0.904533	0.941861	0.817339	1	0.988385	1.04443	1.01438	0.801404	0.739766	0.679871	0.596923		-0.0787481	0.870813	0.659449		-0.0506651	0.5804	0.963695	Yes	Yes			11	11	0.99202	0.954709	0.888311	0.897138	0.874711	0.793918	0.722039	0.682523	0.99202	0.928581	0.934203	0.872113	0.900013	0.783618	0.674631	0.593146
O95210	STBD1	11	11	1	0.860682	0.872291	0.845096	0.615963	0.379155	0.17214	0.0758036	1	1.05	1.06431	0.979351	0.733527	0.458693	0.210642	0.0833758	12.9168	-0.110718	0	0.949902	14.235	-0.120242	0	0.990828	Yes	Yes	Yes	Yes	9	9	0.99202	0.962845	0.860571	0.686124	0.492141	0.318949	0.23225	0.164838	0.99202	1.06287	0.967061	0.851933	0.634081	0.429151	0.292486	0.211161
O95214-2	LEPROTL1	1	1	1	1.07564	1.28613	1.19841	1.19422	1.16013	0.851678	0.447709	1	1.38367	1.3858	1.57761	1.41238	1.03626	0.878981	0.354794	18.5989	-0.761539	0.447708	0.628014					Yes	No			1	1	0.99202	1.39274	1.33653	1.01022	0.948185	0.884081	0.663652	0.78723	0.99202	0.88476	0.849381	0.785535	0.822732	0.560541	0.420233	0.318882
O95218	ZRANB2	15	15	1	0.848068	0.923491	0.820485	0.535985	0.282931	0.14103	0.0959404	1	1.00078	0.925999	0.842323	0.463875	0.232645	0.130332	0.0927178	12.0767	-0.117911	0	0.968054	11.6885	-0.131223	0.00776939	0.995736	Yes	Yes	Yes	Yes	13	13	0.99202	0.979853	0.915246	0.891268	0.826485	0.769018	0.734635	0.758414	0.99202	0.957846	0.916847	0.951987	1.00342	0.927721	0.848731	0.778605
O95219	SNX4	9	9	1	0.964233	1.02528	0.946576	0.655471	0.370693	0.190203	0.126912	1	0.998378	1.05193	0.985574	0.655129	0.382611	0.18625	0.11037	13.4505	-0.116725	0.00936493	0.997783	13.5385	-0.120763	0.00665982	0.995374	Yes	Yes	Yes	Yes	12	12	0.99202	0.907637	0.733465	0.494286	0.312521	0.19312	0.114611	0.0665367	0.99202	0.930383	0.757036	0.497724	0.274528	0.177701	0.109998	0.0745439
O95229	ZWINT	8	8	1	1.00739	1.04141	1.05252	0.807534	0.744807	0.638084	0.389225	1	1.09882	1.09172	1.06615	0.828079	0.694187	0.555225	0.340601	19.5317	-0.0563552	0	0.945648	18.1784	-0.0664434	0	0.943961	Yes	Yes	Yes	Yes	12	12	0.99202	1.00694	0.937577	0.933618	0.826903	0.760813	0.705951	0.670528	0.99202	0.957037	1.01544	0.858968	0.947456	0.809387	0.703026	0.621085
O95232	LUC7L3	19	19	1	0.998703	0.920459	0.759662	0.41455	0.178485	0.122074	0.0352059	1	0.958157	0.884756	0.748953	0.392647	0.166991	0.0704297	0.0311978	10.9997	-0.137928	0	0.994098	10.8048	-0.146277	0	0.987321	Yes	Yes	Yes	Yes	23	23	0.99202	0.968883	0.94785	0.918606	0.896969	0.84522	0.753078	0.627197	0.99202	0.958418	1.01577	0.93566	0.991365	0.894701	0.73296	0.555618
O95235	KIF20A	10	10	1	1.00986	1.05291	0.969336	0.540826	0.25918	0.171634	0.102665	1	1.05091	1.03198	0.991299	0.576679	0.261031	0.164239	0.117793	12.3611	-0.163456	0.0994818	0.996225	12.5349	-0.173701	0.112608	0.996095	Yes	Yes	Yes	Yes	6	6	0.99202	1.00419	0.848922	0.509796	0.369297	0.265822	0.17595	0.12507	0.99202	0.928528	0.711205	0.458567	0.302498	0.212639	0.146779	0.107905
O95239	KIF4A	45	45	1	1.00572	1.03297	0.925394	0.486715	0.154756	0.0856563	0.0640224	1	1.00838	1.03516	0.930846	0.481266	0.169488	0.0880522	0.0643366	11.8761	-0.185252	0.0368249	0.998902	11.8763	-0.182696	0.0401814	0.999018	Yes	Yes	Yes	Yes	43	43	0.99202	0.913041	0.703636	0.470688	0.278593	0.166228	0.0926755	0.0522226	0.99202	0.902763	0.689114	0.479867	0.261587	0.166718	0.107145	0.0572197
O95248-4	SBF1	21	21	1	0.985697	1.04429	0.918145	0.523337	0.262288	0.168208	0.124003	1	1.0186	1.01963	0.949309	0.562067	0.264413	0.172179	0.115241	12.21	-0.147111	0.0905497	0.997939	12.4725	-0.153142	0.0917618	0.999071	Yes	Yes	Yes	Yes	18	18	0.99202	0.922351	0.798442	0.527815	0.295214	0.181489	0.128784	0.0857782	0.99202	0.971871	0.768709	0.553397	0.32601	0.199357	0.137833	0.0863653
O95249	GOSR1	5	5	1	1.00059	1.07633	0.896212	0.622315	0.333526	0.170672	0.0998124	1	0.998363	1.05515	0.884519	0.591881	0.277954	0.137956	0.0889392	13.0101	-0.119083	0	0.993776	12.61	-0.128746	0	0.996217	Yes	Yes	Yes	Yes
O95251	KAT7	4	4	1	1.05703	1.01575	0.98447	0.544342	0.295835	0.197002	0.0993323	1	1.0101	1.10901	0.953334	0.594899	0.295313	0.173108	0.0589168	12.518	-0.151468	0.10161	0.992628	12.8607	-0.132628	0	0.988833	Yes	Yes	Yes	Yes	2	2	0.99202	0.916847	0.678036	0.453692	0.265098	0.143675	0.108159	0.0779776	0.99202	0.888498	0.631559	0.450852	0.244021	0.164162	0.120754	0.0823776
O95260-2	ATE1	13	13	1	1.00452	1.04975	1.02641	0.83733	0.93199	1.01012	0.821079	1	0.999925	1.11725	1.06939	0.905794	0.893283	0.928441	0.784189		-0.0493342	0.901412	0.488233		-0.0184381	0	0.637071	Yes	Yes			14	14	0.99202	1.01038	0.968269	0.880557	0.642513	0.286303	0.15375	0.107894	0.99202	0.94729	0.929197	0.852776	0.630076	0.270672	0.125509	0.0874465
O95260	ATE1	2	2	1	0.96173	0.988416	0.993583	0.798767	0.885463	1.04326	0.972126	1	0.955546	1.14151	0.97007	0.833558	0.830461	0.851014	0.7544		-0.212799	0.924904	0.159482		-0.0534723	0.807147	0.747162	Yes	Yes			2	2	0.99202	0.951352	0.960899	0.836419	0.61831	0.308332	0.14022	0.0581249	0.99202	1.00355	1.06139	0.856737	0.776133	0.355017	0.147025	0.0840837
O95271	TNKS	9	9	1	0.975737	0.96748	0.906178	0.59782	0.352774	0.177201	0.0999056	1	0.970402	0.994627	0.913425	0.617212	0.362075	0.156917	0.0860802	12.9676	-0.115625	0	0.997474	13.0835	-0.120573	0	0.996993	Yes	Yes	Yes	Yes	6	6	0.99202	1.00132	0.899006	0.687584	0.513038	0.315642	0.23087	0.181101	0.99202	0.996076	0.900604	0.687257	0.504892	0.335117	0.234082	0.144878
O95273	CCNDBP1	5	5	1	1.0325	1.06203	0.998715	0.792044	0.689505	0.38103	0.0712833	1	1.07813	1.12565	1.00516	0.788623	0.613199	0.303875	0.0834487	16.1819	-0.114418	0	0.960202	15.4845	-0.113929	0	0.964066	Yes	Yes	Yes	Yes	5	5	0.99202	0.98737	0.922648	0.812146	0.753095	0.632416	0.519682	0.421832	0.99202	1.00404	0.986528	0.916506	0.759704	0.659166	0.516618	0.403024
O95292	VAPB	18	18	1	0.962418	1.07691	1.01404	0.724802	0.776229	0.609492	0.314555	1	0.956372	0.98569	1.0102	0.884982	0.848366	0.743855	0.353945	18.6569	-0.0591161	0	0.891625	19.7792	-0.0973575	0	0.928144	Yes	Yes	Yes	Yes	22	22	0.99202	0.956966	0.915915	0.891198	0.870526	0.752684	0.567353	0.42572	0.99202	1.00379	0.938583	0.847207	0.843628	0.697433	0.489305	0.354182
O95294-3	RASAL1	1	1	1	1.15438	0.994074	0.891058	0.427121	0.156992	0.0609251	0	1	0.891226	1.08578	0.784626	0.584715	0.12684	0.0405711	0	11.5361	-0.176354	0	0.984228	11.957	-0.164765	0	0.963108	Yes	Yes	Yes	Yes	1	1	0.99202	0.673153	0.483078	0.292249	0.15464	0.0641686	0.0795232	0.0309849	0.99202	1.10587	0.494617	0.389025	0.128793	0.0843877	0.0890823	0.0446967
O95295	SNAPIN	6	6	1	0.97311	0.959319	0.939568	0.749233	0.753546	0.714152	0.607182	1	1.01409	0.95559	1.0325	0.760848	0.651424	0.580947	0.53717		-0.0294745	0	0.943221		-0.0874771	0.552437	0.976509	Yes	Yes			7	7	0.99202	0.911188	0.936436	0.876202	0.836171	0.671353	0.622324	0.533959	0.99202	0.924388	0.930103	0.827783	0.899411	0.737256	0.611549	0.49202
O95297	MPZL1	6	6	1	0.974425	0.90959	0.966572	0.77792	0.896952	1.05273	1.11748	1	1.00127	1.02099	0.983924	0.870248	0.879612	0.928034	0.98062			0.953541	0.0270763		-0.204659	0.914629	0.652684	Yes	Yes			8	8	0.99202	1.0007	0.904097	0.87645	0.863584	0.768121	0.735572	0.670122	0.99202	1.02685	1.05255	0.961086	1.03129	0.947339	0.795241	0.652671
O95298	NDUFC2	9	9	1	0.898873	0.984767	0.886051	0.588134	0.356015	0.121686	0.032463	1	1.08872	1.0707	1.02217	0.665703	0.334733	0.149325	0.0552556	12.7715	-0.12799	0	0.981726	13.3682	-0.141675	0	0.987162	Yes	Yes	Yes	Yes	4	4	0.99202	0.869422	0.862656	0.713955	0.525122	0.355781	0.220639	0.104216	0.99202	0.895412	0.846846	0.684203	0.514131	0.28165	0.207614	0.118873
O95299	NDUFA10	21	21	1	0.99937	1.03266	0.904091	0.520887	0.219032	0.101112	0.0556007	1	1.02452	1.03711	0.900006	0.533802	0.230619	0.0981973	0.0681002	12.13	-0.148817	0	0.999084	12.2064	-0.145136	0	0.99816	Yes	Yes	Yes	Yes	15	15	0.99202	0.731195	0.56644	0.296881	0.156192	0.0940693	0.0588828	0.0305703	0.99202	0.816868	0.48083	0.341298	0.14953	0.0953174	0.0672795	0.0432689
O95302	FKBP9	19	19	1	0.971893	0.99592	0.998062	0.839867	0.946153	1.10906	1.18586	1	0.977695	1.03227	0.973719	0.8603	0.871817	0.932202	0.936253		0.287896	1.18586	0.611309		-0.246727	0.900143	0.751878	Yes	Yes			23	23	0.99202	0.970599	0.890674	0.772639	0.636546	0.493483	0.393632	0.322957	0.99202	0.898674	0.88877	0.772415	0.657942	0.505827	0.381334	0.287354
O95336	PGLS	19	19	1	1.11699	1.23176	1.26826	0.926909	1.21519	0.941695	0.101989	1	1.16265	1.12931	1.12186	1.02206	0.991488	0.742666	0.0991889	18.5702	-1.11113	0.101971	0.808217	18.8752	-0.290833	0	0.932679	Yes	Yes	Yes	Yes	23	23	0.99202	0.836022	1.07401	1.39973	1.38488	1.19651	0.963836	0.394547	0.99202	1.05569	1.05571	0.963262	0.977907	0.86244	0.692161	0.434928
O95340-2	PAPSS2	12	12	1	1.02885	1.08291	1.08283	0.964506	0.818472	0.465419	0.112507	1	0.976547	1.00897	0.917217	0.682091	0.571092	0.291573	0.0726015	17.4892	-0.150865	0	0.9779	14.5719	-0.0986277	0	0.967484	Yes	Yes	Yes	Yes	13	13	0.99202	0.969555	0.926668	0.686807	0.394941	0.201259	0.12517	0.0814298	0.99202	0.952687	0.860004	0.638322	0.320954	0.183421	0.125346	0.0734221
O95347	SMC2	56	56	1	1.03308	1.00571	0.883669	0.47517	0.130728	0.0428561	0.0318203	1	0.981114	0.966837	0.854945	0.463418	0.137868	0.0451081	0.0299124	11.7047	-0.17889	0	0.99773	11.5511	-0.169297	0	0.996766	Yes	Yes	Yes	Yes	61	61	0.99202	0.90646	0.74067	0.495916	0.307913	0.179498	0.113025	0.0654174	0.99202	0.905678	0.670975	0.517292	0.291177	0.176305	0.125293	0.0783714
O95352	ATG7	25	25	1	0.999786	1.05802	0.995739	0.731456	0.453434	0.206357	0.116712	1	0.991997	1.02768	0.95572	0.722184	0.418471	0.220501	0.107995	14.2425	-0.117441	0	0.994516	14.0301	-0.115695	0	0.998582	Yes	Yes	Yes	Yes	20	20	0.99202	0.966114	0.885876	0.63977	0.408055	0.245739	0.169206	0.105569	0.99202	0.932195	0.844432	0.641848	0.375456	0.237407	0.151702	0.0924428
O95359-3	TACC2	23	23	1	0.990003	1.0698	1.01963	0.782041	0.818051	0.784954	0.562646	1	0.991507	1.04428	1.00377	0.828922	0.73601	0.667618	0.461237		-0.0325212	0	0.848213		-0.0468127	0	0.964428	Yes	Yes			26	26	0.99202	0.958609	0.94723	0.938929	0.873272	0.848422	0.811623	0.814082	0.99202	0.952164	0.988189	0.913608	0.946058	0.874317	0.787509	0.717768
O95361	TRIM16	12	12	1	1.16115	1.21316	1.11323	0.898618	0.716012	0.556691	0.219888	1	1.04686	1.06995	1.04151	0.854908	0.641714	0.442713	0.214342	17.7039	-0.0925959	0	0.880537	16.659	-0.0901436	0	0.981119	Yes	Yes	Yes	Yes	17	17	0.99202	0.940652	0.935687	0.819291	0.618503	0.395617	0.276766	0.199348	0.99202	0.930397	0.961305	0.784466	0.576142	0.414455	0.263787	0.175684
O95363	FARS2	7	7	1	1.00462	1.04984	0.983095	0.588365	0.246491	0.0585807	0.0238161	1	0.9922	1.03374	0.996868	0.62442	0.242614	0.0819688	0.025448	12.6211	-0.170342	0	0.996648	12.8044	-0.171201	0	0.998302	Yes	Yes	Yes	Yes	9	9	0.99202	0.901161	0.714062	0.440544	0.275256	0.166294	0.0994376	0.072847	0.99202	0.89389	0.627027	0.487565	0.275022	0.162675	0.141209	0.0875545
O95365	ZBTB7A	7	7	1	0.97368	1.07763	0.976912	0.672417	0.605512	0.461732	0.293471	1	0.961771	0.990843	0.920243	0.674447	0.553212	0.399555	0.234826	16.2523	-0.0659802	0	0.964713	15.2151	-0.0735773	0	0.987556	Yes	Yes	Yes	Yes	3	3	0.99202	1.03254	1.20599	0.855138	0.969008	0.846283	0.586017	0.541907	0.99202	1.21329	1.14059	0.83943	0.45455	0.345834	0.238122	0.148194
O95372	LYPLA2	20	20	1	1.12005	1.17455	1.18352	0.784191	0.916231	0.688366	0.389783	1	1.19347	1.0923	1.09232	0.914551	0.804019	0.570659	0.307338	19.8678	-0.0886307	0	0.772265	18.5271	-0.0898556	0	0.907707	Yes	Yes		Yes	13	13	0.99202	0.79187	1.07959	1.54535	1.34468	0.757908	0.319516	0.111038	0.99202	1.07572	1.02439	0.974016	0.779625	0.485344	0.205756	0.1076
O95373	IPO7	43	43	1	0.998138	1.01877	0.970208	0.644428	0.339883	0.144166	0.066724	1	1.05166	1.0811	1.00735	0.682533	0.33558	0.159944	0.0674332	13.2279	-0.134429	0	0.998557	13.451	-0.139197	0.00275851	0.991124	Yes	Yes	Yes	Yes	48	48	0.99202	0.925673	0.780236	0.583755	0.400502	0.273467	0.177326	0.10299	0.99202	0.913029	0.753533	0.590381	0.373789	0.241378	0.180255	0.101806
O95376	ARIH2	12	12	1	0.925136	1.04467	1.02943	0.785221	0.667597	0.307059	0.0810672	1	0.959116	1.02919	1.02456	0.7229	0.552387	0.247937	0.0821422	15.8083	-0.118312	0	0.963744	14.7399	-0.112414	0	0.979497	Yes	Yes	Yes	Yes	9	9	0.99202	0.951344	0.96239	0.776429	0.582289	0.333201	0.224134	0.180642	0.99202	0.956462	0.974219	0.741171	0.502918	0.285958	0.196591	0.153051
O95379	TNFAIP8	2	2	1	0.955866	0.991026	0.977058	0.798875	0.883097	0.643054	0.147584	1	1.11385	1.15773	1.19177	0.90345	0.876039	0.641977	0.179026	18.6085	-0.184358	0	0.913626	18.6449	-0.161467	0	0.885106	Yes	Yes	Yes	Yes	1	1	0.99202	1.11042	0.858227	1.18131	0.950672	0.93691	0.702744	0.84059	0.99202	0.965887	0.902674	0.943113	0.973383	1.01894	0.820434	0.519361
O95382	MAP3K6	2	2	1	0.817543	0.978406	1.03737	0.624595	0.767228	0.575363	0.444682	1	0.781727	0.935921	1.12807	1.27014	1.41847	1.74722	1.05642	20.0551	-0.0457962	0	0.73744		0.0942707	1.40185	0.544102	Yes	Yes
O95394-4	PGM3	26	26	1	1.03017	1.03867	1.03187	0.835718	0.750183	0.409054	0.039676	1	1.03713	1.03991	1.02142	0.86613	0.732214	0.420258	0.0659273	16.7668	-0.143779	0	0.961556	16.7689	-0.13407	0	0.971894	Yes	Yes	Yes	Yes	32	32	0.99202	0.989071	0.929431	0.847088	0.614609	0.323974	0.215501	0.124545	0.99202	0.950724	0.950123	0.798162	0.624405	0.321812	0.209032	0.120309
O95395	GCNT3	2	2	1	0.799062	0.818828	0.797619	0.461429	0.334154	0.211375	0.0651551	1	0.992205	1.15458	1.04991	0.696627	0.420071	0.350808	0.169681	11.6881	-0.1058	0	0.906321	14.1014	-0.1159	0.156629	0.959772	Yes	Yes	Yes	Yes
O95396	MOCS3	8	8	1	1.08828	1.11147	1.03041	0.677222	0.349926	0.15286	0.0889846	1	1.00022	1.01397	0.936554	0.612163	0.313611	0.12885	0.0790462	13.4536	-0.141954	0.0292645	0.981161	12.9201	-0.133317	0	0.99925	Yes	Yes	Yes	Yes	9	9	0.99202	0.908393	0.76942	0.596836	0.387185	0.240754	0.162237	0.112629	0.99202	0.920216	0.73282	0.633455	0.343757	0.21282	0.141136	0.0898345
O95400	CD2BP2	14	14	1	1.14103	1.01626	0.984223	0.674383	0.746734	0.632943	0.326465	1	1.05807	1.15111	1.02309	0.764804	0.774321	0.737513	0.359541	18.8785	-0.0517996	0	0.859749	20.2491	-0.0526287	0	0.826305	Yes	Yes	Yes	Yes	12	12	0.99202	0.979185	1.15479	1.03109	0.959254	0.820501	0.736302	0.693741	0.99202	1.02502	1.13183	1.00657	0.921246	0.73347	0.647276	0.597241
O95402	MED26	3	3	1	0.965652	1.04337	1.10273	0.673876	0.540638	0.42396	0.276661	1	1.09124	1.011	0.979772	0.655198	0.517305	0.342893	0.252972	14.9899	-0.0977402	0.26641	0.951547	14.6539	-0.087029	0.115019	0.980323	Yes	Yes	Yes	Yes	4	4	0.99202	0.890617	0.912116	0.751218	0.762541	0.664931	0.480659	0.449524	0.99202	0.917279	0.81225	0.804271	0.756682	0.61195	0.471609	0.428675
O95405	ZFYVE9	7	7	1	1.04644	1.15339	1.14638	0.824177	0.793372	0.637456	0.469186	1	1.02831	1.11988	1.04184	0.82357	0.786804	0.623748	0.427724	20.5857	-0.0535305	0	0.857671	20.0007	-0.0554401	0	0.929152	Yes	Yes	Yes	Yes	11	11	0.99202	1.00427	0.961609	0.924565	0.726418	0.566135	0.453557	0.377918	0.99202	0.971666	0.983775	0.841675	0.757128	0.606204	0.48453	0.332939
O95407	TNFRSF6B	1	1	1	0.925282	0.945062	0.678609	0.51491	0.408346	0.210684	0.0853431	1	1.11474	1.26302	1.39375	0.865564	0.489267	0.532813	0.218431	11.6402	-0.0955044	0	0.967544	15.5303	-0.119912	0.293201	0.764329	Yes	Yes	Yes
O95425	SVIL	6	6	1	1.10471	1.10758	1.04931	0.699609	0.485001	0.304761	0.226055	1	1.00023	1.1907	1.07928	0.647006	0.415082	0.278852	0.225073	14.4142	-0.108418	0.159528	0.966054	13.4242	-0.143548	0.229344	0.951288	Yes	Yes	Yes	Yes	4	4	0.99202	0.986556	0.953578	0.880184	0.706328	0.534612	0.370013	0.297098	0.99202	1.05885	0.997942	0.914899	0.676558	0.544713	0.372865	0.306967
O95429	BAG4	10	10	1	1.09117	1.18599	1.11498	0.89231	1.01346	1.04371	1.07535	1	1.01623	1.00516	0.935962	0.796597	0.766794	0.778695	0.845216		0.0160322	1.08527	-0.261255		-0.504014	0.796825	0.952684	Yes	Yes			6	6	0.99202	0.970331	0.895052	0.904386	0.913346	0.823563	0.775938	0.746665	0.99202	0.934399	0.946593	0.845313	0.967047	0.898727	0.766097	0.704808
O95433	AHSA1	54	54	1	1.0294	1.03736	1.01508	0.712088	0.384457	0.158477	0.0632523	1	1.00698	1.04628	1.0085	0.737543	0.409208	0.188139	0.070335	13.7616	-0.13682	0	0.995531	14.0192	-0.131105	0	0.996027	Yes	Yes	Yes	Yes	60	60	0.99202	0.960825	0.885022	0.763972	0.576191	0.398296	0.281734	0.189986	0.99202	0.959749	0.95142	0.782133	0.605868	0.400811	0.288012	0.19071
O95445	APOM	1	1	1	0.892799	0.936191	0.823362	0.661306	0.571137	0.819478	0.786109	1	0.860177	0.890894	0.836518	0.735002	0.616244	0.512243	0.533798		-0.0748871	0.711107	0.592824		-0.042824	0	0.886036	Yes	Yes
O95453	PARN	33	33	1	0.967473	0.975138	0.946621	0.729874	0.710637	0.579584	0.164199	1	1.01446	1.00997	0.971399	0.811371	0.717733	0.526965	0.189436	17.0749	-0.0726587	0	0.889975	17.2398	-0.0857295	0	0.95711	Yes	Yes	Yes	Yes	33	33	0.99202	0.997778	0.983882	0.87682	0.692614	0.409852	0.273477	0.161142	0.99202	0.980617	0.972655	0.884408	0.702152	0.41853	0.26021	0.162082
O95455	TGDS	2	2	1	0.974255	1.18189	1.05208	0.918919	0.940042	1.04981	0.922898	1	1.0816	1.11416	1.10358	0.903366	0.802529	0.787214	0.7696		-0.0154597	0.959212	0.111438		-0.0761232	0.782615	0.798543	Yes	Yes			2	2	0.99202	0.890445	0.930298	0.762488	0.51038	0.300554	0.219469	0.144923	0.99202	0.959503	0.89115	0.881295	0.456652	0.370389	0.194522	0.156948
O95456	PSMG1	19	19	1	1.06894	1.12255	1.08685	0.90173	1.01673	1.15838	0.9494	1	1.0149	1.10115	1.05367	0.889135	0.867089	0.941279	0.808769			1.08702	0.0310809		-0.258785	0.872379	0.684326	Yes	Yes			18	18	0.99202	0.965048	0.939629	0.917104	0.924845	0.854903	0.780424	0.583684	0.99202	0.993367	0.94278	0.923289	1.00269	0.876349	0.723788	0.526491
O95466-3	FMNL1	3	3	1	1.05104	1.17353	0.939161	0.497343	0.271361	0.177329	0.0870221	1	0.883505	1.03411	0.958489	0.568663	0.27338	0.185711	0.0882481	12.1567	-0.151403	0.0836544	0.973073	12.5884	-0.14626	0.0689315	0.984626	Yes	Yes	Yes	Yes	2	2	0.99202	0.847761	0.762347	0.587232	0.411953	0.281403	0.231291	0.154033	0.99202	0.906565	0.735293	0.635935	0.446231	0.316042	0.235568	0.173739
O95470	SGPL1	18	18	1	1.02369	0.960756	0.846843	0.490128	0.216511	0.0898079	0.0597847	1	1.00957	0.975309	0.875313	0.502117	0.209943	0.105168	0.0512279	11.7773	-0.14148	0	0.997565	11.9328	-0.145449	0	0.999204	Yes	Yes	Yes	Yes	20	20	0.99202	0.858061	0.665254	0.404769	0.244247	0.141456	0.0848212	0.046271	0.99202	0.863509	0.610293	0.4085	0.210105	0.134998	0.0852188	0.0531164
O95478	NSA2	5	5	1	1.00465	0.958468	0.759224	0.402489	0.203502	0.129598	0.148992	1	0.95783	0.940577	0.855416	0.399811	0.220536	0.189547	0.122762	10.9392	-0.140134	0.0710149	0.997669	11.2605	-0.165254	0.124969	0.993929	Yes	Yes	Yes	Yes
O95479	H6PD	7	7	1	0.986326	0.959872	0.996237	0.77265	0.583144	0.236458	0.0867446	1	0.947275	1.08298	0.978582	0.822867	0.596463	0.24149	0.0919565	15.075	-0.118621	0	0.983757	15.3604	-0.126068	0	0.981841	Yes	Yes	Yes	Yes	7	7	0.99202	0.931207	0.865452	0.795957	0.564016	0.348051	0.293646	0.19945	0.99202	0.914749	0.916844	0.819676	0.60975	0.38889	0.268935	0.216104
O95486	SEC24A	23	23	1	1.03013	1.09503	0.993483	0.695522	0.376773	0.170706	0.0789131	1	1.0079	1.04758	0.975033	0.673815	0.354474	0.162872	0.0636267	13.6718	-0.130581	0	0.990509	13.4481	-0.132975	0	0.996984	Yes	Yes	Yes	Yes	18	18	0.99202	0.9792	0.829851	0.504542	0.266312	0.143217	0.0884283	0.0430964	0.99202	0.941332	0.814992	0.523606	0.23649	0.141366	0.0912822	0.0433287
O95487	SEC24B	28	28	1	0.989463	0.992465	0.936932	0.592118	0.297234	0.124565	0.0734133	1	1.02793	1.04663	0.953131	0.637989	0.30748	0.133494	0.0827754	12.7661	-0.13587	0	0.999422	13.0645	-0.136845	0.00133212	0.997405	Yes	Yes	Yes	Yes	21	21	0.99202	0.949783	0.728854	0.422244	0.22346	0.14243	0.0873615	0.0510201	0.99202	0.947664	0.68487	0.434484	0.221866	0.136336	0.0931315	0.0531802
O95502	NPTXR	1	1	1	1.1825	1.01002	0.983074	1.01751	0.954356	0.910926	0.939636	1	1.09575	0.910939	1.16267	0.776001	0.721744	0.878709	0.645799		-0.132517	0.925281	0.277974		-0.563747	0.748751	0.687435	Yes	Yes			4	4	0.99202	0.876384	0.871931	0.845509	0.717789	0.705523	0.589841	0.502896	0.99202	0.909954	0.985806	0.819091	0.770571	0.745822	0.65591	0.513939
O95503	CBX6	3	3	1	1.07537	1.02913	1.00242	0.663051	0.539144	0.507809	0.232227	1	0.847213	1.02166	1.03839	0.627181	0.461709	0.405612	0.208127	15.7935	-0.0701669	0	0.94782	14.0358	-0.106742	0.222887	0.934035	Yes	Yes	Yes	Yes
O95544	NADK	7	7	1	0.943065	1.00928	1.01304	0.770148	0.821946	0.847182	0.681299	1	1.01114	1.04546	0.975165	0.83184	0.782922	0.716895	0.524453		-0.205874	0.779929	0.818923		-0.0385804	0	0.954667	Yes	Yes
O95551-2	TDP2	7	7	1	0.914459	0.99573	0.923184	0.77839	0.801164	0.869115	0.696151	1	0.978784	1.08647	0.965494	0.834073	0.787404	0.767278	0.675985		-0.55725	0.786205	0.72034		-0.0345419	0.644979	0.918686	Yes	Yes			8	8	0.99202	0.959214	0.966666	0.902573	0.677855	0.476397	0.28605	0.161728	0.99202	0.939829	0.994477	0.793558	0.709562	0.451913	0.304567	0.177606
O95563	MPC2	5	5	1	0.925688	0.975421	0.854647	0.537098	0.243078	0.0754399	0.0166693	1	1.0449	1.01007	0.896753	0.597086	0.238197	0.0882054	0.0360897	12.089	-0.145672	0	0.989894	12.533	-0.152734	0	0.996152	Yes	Yes	Yes	Yes	3	3	0.99202	0.948155	0.748207	0.524615	0.368202	0.244475	0.169906	0.103764	0.99202	0.892783	0.724795	0.551937	0.355947	0.202677	0.163768	0.109475
O95568	METTL18	1	1	1	1.03121	1.20286	0.976981	0.81766	0.67719	0.402796	0.0862642	1	1.05506	1.30593	1.17707	0.823995	0.654739	0.377744	0.163452	16.2749	-0.111335	0	0.931569	16.2679	-0.104207	0	0.874508	Yes	Yes	Yes	Yes	5	5	0.99202	0.875738	1.09389	0.869527	0.801853	0.618951	0.426375	0.229241	0.99202	1.04965	1.07973	1.02966	0.866641	0.707269	0.504377	0.274262
O95571	ETHE1	19	19	1	1.02397	1.03501	0.986296	0.784934	0.815549	0.943301	0.865898	1	0.972386	0.999868	0.942563	0.732036	0.701411	0.752664	0.740203		-0.401855	0.852421	0.756435		-0.233381	0.731524	0.98258	Yes	Yes			19	19	0.99202	0.951878	0.937138	0.835042	0.751061	0.596433	0.468711	0.280761	0.99202	0.934838	0.925779	0.838223	0.858451	0.67046	0.476047	0.313487
O95573	ACSL3	50	50	1	0.999802	1.04587	0.901995	0.539426	0.236826	0.122212	0.0812242	1	0.971545	0.995802	0.89082	0.533457	0.232515	0.119223	0.0728478	12.2541	-0.14254	0.0156715	0.998094	12.1948	-0.139183	0	0.99914	Yes	Yes	Yes	Yes	51	51	0.99202	0.839302	0.658736	0.425804	0.267164	0.175495	0.117964	0.074927	0.99202	0.871322	0.607433	0.442814	0.260055	0.170672	0.119275	0.0830373
O95602	POLR1A	43	43	1	1.03173	1.01104	0.940276	0.56202	0.225071	0.078383	0.0540601	1	1.03239	1.04372	0.981294	0.602548	0.250542	0.101989	0.0629767	12.4098	-0.159124	0	0.998941	12.7009	-0.164051	0.025954	0.997331	Yes	Yes	Yes	Yes	40	40	0.99202	0.974726	0.835772	0.58981	0.357152	0.18798	0.112932	0.0607102	0.99202	1.02252	0.786748	0.599369	0.319965	0.181116	0.120593	0.0788468
O95613	PCNT	16	16	1	1.0145	1.0545	0.965408	0.675906	0.524219	0.448812	0.254615	1	1.00726	1.07635	1.01508	0.754352	0.547237	0.42578	0.252611	15.4349	-0.0733283	0.0406965	0.978881	15.8152	-0.0801139	0.0508131	0.981626	Yes	Yes	Yes	Yes	18	18	0.99202	0.974128	0.89115	0.776118	0.608561	0.45714	0.387018	0.321819	0.99202	0.97152	0.861584	0.790941	0.67575	0.544225	0.53255	0.347754
O95619	YEATS4	6	6	1	0.964538	1.04542	0.902591	0.620522	0.588837	0.57786	0.455216	1	1.00148	1.04927	0.961433	0.675169	0.602798	0.598407	0.467903		-0.0958053	0.509437	0.968126		-0.0908137	0.520689	0.969831	Yes	Yes			5	5	0.99202	0.942815	0.906313	0.812725	0.859188	0.530775	0.279022	0.154207	0.99202	0.930322	0.966638	0.923058	0.912974	0.623463	0.287568	0.144198
O95625	ZBTB11	6	6	1	1.00339	1.03712	0.865883	0.419027	0.216213	0.170091	0.0935648	1	1.05405	1.0383	0.8716	0.414625	0.226342	0.158816	0.109337	11.4376	-0.159704	0.0906197	0.997511	11.4263	-0.163404	0.101892	0.995768	Yes	Yes	Yes	Yes
O95628-9	CNOT4	9	9	1	0.972729	1.05482	1.10317	0.752077	0.674204	0.5302	0.527307	1	1.0109	1.05396	1.09638	0.824925	0.66037	0.483726	0.444482		-0.0906689	0.530712	0.935581	17.9431	-0.0814018	0.383486	0.964482	Yes	Yes			12	12	0.99202	0.960229	0.920721	0.91561	0.818468	0.789308	0.731304	0.614554	0.99202	0.960069	0.954761	0.88701	0.995513	0.863781	0.759442	0.640858
O95630	STAMBP	9	9	1	0.935279	1.06343	1.07335	0.846122	0.957209	1.1526	1.09356	1	0.992402	1.04245	1.05124	0.895098	0.924122	0.999225	1.03269		0.107123	1.03104	0.0567994		-0.0131846	0.965035	0.187217	Yes	Yes			12	12	0.99202	0.912489	0.931366	0.903471	0.788651	0.574643	0.362624	0.205044	0.99202	0.953545	0.974879	0.870233	0.829675	0.566663	0.356101	0.183688
O95639	CPSF4	1	1	1	0.914896	1.08981	0.89944	0.511628	0.262416	0.149412	0.0746964	1	1.04945	0.998179	0.849406	0.509941	0.234888	0.144636	0.0998697	12.1919	-0.135894	0.0196619	0.986268	11.9635	-0.129093	0.0109118	0.997427	Yes	Yes	Yes	Yes	6	6	0.99202	0.968558	0.955979	0.807804	0.51507	0.349646	0.15378	0.124949	0.99202	1.02673	0.873437	0.805135	0.565681	0.300622	0.193451	0.137275
O95644	NFATC1	3	3	1	0.871649	0.785777	0.857241	0.521919	0.360951	0.179189	0.0721878	1	1.01366	1.11619	0.988758	0.635084	0.342156	0.175811	0.100471	12.3479	-0.109902	0	0.922602	13.2232	-0.132884	0.0377286	0.986848	Yes	Yes	Yes	Yes	3	3	0.99202	0.895134	0.873649	0.701816	0.506239	0.299762	0.310047	0.173551	0.99202	0.900094	0.758898	0.57084	0.487705	0.272211	0.220968	0.199379
O95671	ASMTL	14	14	1	0.986277	0.9968	0.896511	0.625588	0.289204	0.0994418	0.032162	1	0.997624	1.0003	0.922974	0.606914	0.291221	0.100965	0.0393085	12.8083	-0.144738	0	0.995956	12.7671	-0.144685	0	0.998228	Yes	Yes	Yes	Yes	19	19	0.99202	0.938789	0.854037	0.634232	0.433302	0.270345	0.174394	0.0920829	0.99202	0.936782	0.839709	0.631599	0.439731	0.262357	0.173987	0.0944032
O95674	CDS2	5	5	1	0.91095	1.02232	0.859711	0.545183	0.322084	0.157089	0.0713435	1	0.979569	0.993654	0.897309	0.622022	0.333607	0.163983	0.0710064	12.4196	-0.119494	0	0.989303	12.9811	-0.123118	0	0.997634	Yes	Yes	Yes	Yes	2	2	0.99202	0.948223	0.782942	0.747186	0.541486	0.38113	0.246537	0.227356	0.99202	1.05472	0.765114	0.671757	0.552487	0.451125	0.338673	0.191806
O95684	FGFR1OP	8	8	1	0.952157	1.00718	0.99543	0.78431	0.703003	0.654964	0.376331	1	1.05147	1.03695	0.949769	0.80226	0.701701	0.53427	0.340639	19.4971	-0.051971	0	0.935473	18.0523	-0.0614534	0	0.977797	Yes	Yes	Yes	Yes	12	12	0.99202	0.965164	0.907146	0.892194	0.886013	0.773989	0.773213	0.710693	0.99202	0.945038	0.938852	0.862516	0.910189	0.78188	0.71121	0.617536
O95685	PPP1R3D	4	4	1	0.990604	1.00479	0.998246	0.768104	0.724016	0.615081	0.343518	1	1.03071	1.02738	1.03459	0.810854	0.726609	0.608842	0.318765	18.8019	-0.0566739	0	0.946033	18.518	-0.0649577	0	0.952707	Yes	Yes	Yes	Yes	4	4	0.99202	0.919964	0.87795	0.809589	0.567542	0.332661	0.183789	0.149407	0.99202	0.989422	0.899217	0.749076	0.550231	0.34312	0.215906	0.158902
O95707	POP4	6	6	1	1.19803	1.05703	0.957574	0.7101	0.631313	0.620181	0.417112	1	0.967961	1.11906	0.907112	0.612783	0.538651	0.465644	0.323746	19.5598	-0.0534793	0.268988	0.882828	14.9986	-0.080152	0.288559	0.956886	Yes	Yes	Yes	Yes	3	3	0.99202	1.04593	1.05824	1.09437	0.984621	0.560241	0.297802	0.0484391	0.99202	1.08455	1.0059	0.972545	0.920045	0.560878	0.316777	0.0698815
O95714	HERC2	65	65	1	1.01761	1.00217	0.85609	0.395958	0.134132	0.0748008	0.0587322	1	1.02249	1.0234	0.88829	0.392064	0.140617	0.0815591	0.060484	11.2379	-0.175198	0.021576	0.999497	11.3163	-0.188947	0.0408387	0.999216	Yes	Yes	Yes	Yes	19	19	0.99202	0.869009	0.747669	0.527178	0.334523	0.236446	0.180263	0.132369	0.99202	1.04666	0.679052	0.605664	0.420905	0.299812	0.223057	0.161629
O95716	RAB3D	4	4	1	1.02261	1.04808	0.991231	0.782331	0.791418	0.941568	0.770584	1	1.00725	1.06067	1.02213	0.870755	0.76083	0.737135	0.683807		-0.464793	0.821475	0.76961		-0.054471	0.694045	0.963377	Yes	Yes			2	2	0.99202	0.9585	0.946444	0.97296	0.718706	0.775761	0.610366	0.45379	0.99202	1.08596	0.839733	0.896261	0.749096	0.597883	0.312734	0.293797
O95721	SNAP29	11	11	1	1.00723	1.03957	0.968557	0.768077	0.705884	0.560815	0.36542	1	0.996237	1.00168	0.978138	0.771331	0.631591	0.467747	0.294508	18.4909	-0.056038	0	0.972983	16.8142	-0.0689365	0	0.992024	Yes	Yes	Yes	Yes	15	15	0.99202	0.941903	0.957032	0.920592	0.881098	0.841955	0.792945	0.781257	0.99202	0.942912	0.982471	0.910639	0.950531	0.880557	0.809612	0.770647
O95747	OXSR1	14	14	1	1.10459	1.09317	1.00348	0.697254	0.352685	0.152692	0.0572917	1	0.970697	1.02726	0.91583	0.647611	0.321425	0.117002	0.0526471	13.5593	-0.140215	0	0.983854	13.0671	-0.138544	0	0.996162	Yes	Yes	Yes	Yes	18	18	0.99202	0.951531	0.803433	0.576026	0.41414	0.277077	0.188851	0.105207	0.99202	0.905336	0.755933	0.563634	0.405335	0.258592	0.172162	0.0952009
O95749	GGPS1	9	9	1	0.974251	1.01148	0.94664	0.755859	0.663754	0.294867	0.0354998	1	0.995669	1.03443	0.989794	0.785749	0.678053	0.356942	0.0742478	15.5584	-0.119114	0	0.955404	16.003	-0.11345	0	0.966052	Yes	Yes	Yes	Yes	9	9	0.99202	1.01399	1.00615	0.960908	0.869849	0.634979	0.413487	0.244924	0.99202	0.964067	0.95687	0.909497	0.87107	0.657634	0.394604	0.233788
O95755	RAB36	2	2	1	1.05215	1.0347	0.974774	0.698159	0.551894	0.334281	0.0786687	1	0.997811	1.0727	1.08358	0.845038	0.588967	0.368135	0.0770083	14.7915	-0.0988422	0	0.972073	15.7688	-0.115857	0	0.972892	Yes	Yes	Yes	Yes	1	1	0.99202	0.959796	0.793155	0.56978	0.357814	0.268949	0.1342	0.110428	0.99202	0.964171	0.86092	0.627499	0.376419	0.199931	0.172479	0.096251
O95757	HSPA4L	46	46	1	0.98618	1.01465	0.980949	0.791637	0.708784	0.375561	0.0470369	1	1.00682	1.02163	0.975849	0.833774	0.740246	0.432319	0.0855992	16.2851	-0.124635	0	0.956174	16.8218	-0.124708	0	0.964872	Yes	Yes	Yes	Yes	42	42	0.99202	0.985019	0.894736	0.712286	0.441675	0.271822	0.176915	0.101227	0.99202	0.95745	0.926986	0.716248	0.470596	0.280822	0.182797	0.110653
O95758-4	PTBP3	33	33	1	1.06476	1.05323	1.01428	0.788707	0.664618	0.295994	0.0710209	1	1.03805	1.02902	0.943319	0.738952	0.593719	0.283388	0.075495	15.7632	-0.121855	0	0.968385	15.0308	-0.107011	0	0.973978	Yes	Yes	Yes	Yes	23	23	0.99202	0.964919	0.83875	0.616117	0.306519	0.157867	0.120284	0.0794709	0.99202	1.01201	0.874363	0.648945	0.30347	0.18153	0.123169	0.080108
O95759	TBC1D8	6	6	1	0.989759	1.04734	0.91968	0.481319	0.221362	0.107696	0.0835457	1	0.98758	1.00997	0.913992	0.543304	0.247612	0.109921	0.0702897	11.9264	-0.162058	0.0505073	0.997821	12.3337	-0.141965	0	0.999692	Yes	Yes	Yes	Yes	4	4	0.99202	0.94784	0.975228	0.776419	0.717831	0.530651	0.322882	0.223317	0.99202	0.899259	0.819959	0.758694	0.651765	0.49056	0.301768	0.191099
O95772	STARD3NL	2	2	1	0.825999	0.978736	0.838617	0.558468	0.446605	0.325731	0.171327	1	1.06046	0.890847	0.911894	0.667134	0.419137	0.30841	0.123126	13.3028	-0.0837298	0	0.94569	13.8755	-0.096094	0	0.976556	Yes	Yes	Yes	Yes	1	1	0.99202	1.13714	0.891469	0.892403	0.763193	0.521679	0.447223	0.364631	0.99202	1.07357	0.970951	0.826447	0.712337	0.438355	0.60309	0.399306
O95777	NAA38	11	11	1	1.12879	1.19949	1.14188	0.938717	1.0086	1.33406	1.15719	1	0.979912	1.102	1.04355	0.860082	0.877303	0.947962	0.91997			1.12999	0.130021		-0.0490201	0.901287	0.611129	Yes	Yes			9	9	0.99202	0.986129	1.01848	0.966646	0.951819	0.904163	0.83743	0.715251	0.99202	1.03799	0.952522	0.953822	1.01946	0.970131	0.817904	0.690786
O95782	AP2A1	61	61	1	1.04623	1.05007	1.00943	0.798456	0.550532	0.172293	0.0663643	1	1.02455	1.05411	0.992201	0.782615	0.527322	0.180991	0.0688628	14.8797	-0.137007	0	0.986223	14.706	-0.131439	0	0.988881	Yes	Yes	Yes	Yes	64	64	0.99202	0.970358	0.896065	0.782921	0.660179	0.392707	0.178717	0.0727916	0.99202	0.995652	0.954115	0.780725	0.64945	0.371916	0.181163	0.0825684
O95785	WIZ	7	7	1	0.941718	1.04551	0.967071	0.691002	0.539761	0.459516	0.368599	1	0.966955	0.958409	0.899395	0.662268	0.487666	0.395891	0.286515	15.6039	-0.084998	0.333605	0.983487	14.8734	-0.0719643	0.0389653	0.994445	Yes	Yes		Yes
O95786	DDX58	16	16	1	1.00625	1.00493	0.959564	0.611951	0.286247	0.154352	0.103135	1	1.02343	1.05909	1.00619	0.599736	0.297361	0.152748	0.105912	12.8317	-0.146302	0.0574871	0.999861	12.8065	-0.156867	0.0824266	0.99423	Yes	Yes	Yes	Yes	12	12	0.99202	0.952045	0.807305	0.641555	0.430926	0.267013	0.203373	0.149991	0.99202	0.920994	0.793978	0.661693	0.421239	0.295906	0.224607	0.150807
O95789	ZMYM6	1	1	1	0.759328	1.14294	1.08435	0.691842	0.634872	0.476794	0	1	1.02504	1.17098	1.04823	0.5975	0.531584	0.390581	0	15.6773	-0.0982016	0	0.817703	14.348	-0.0998017	0	0.906797	Yes	Yes	Yes	Yes
O95793-3	STAU1	2	2	1	0.87575	1.01173	0.841259	0.441279	0.194186	0.151714	0.0912793	1	0.981514	0.976178	0.905208	0.406497	0.205051	0.145073	0.0555673	11.4649	-0.148864	0.0554589	0.985121	11.4886	-0.174186	0.0708335	0.996603	Yes	Yes	Yes	Yes
O95793	STAU1	20	20	1	0.901349	0.966182	0.82369	0.409638	0.228638	0.176094	0.154718	1	0.997769	0.949919	0.847514	0.447676	0.250535	0.189607	0.149156	11.2101	-0.154108	0.126415	0.989162	11.5596	-0.142749	0.116473	0.997732	Yes	Yes	Yes	Yes	10	10	0.99202	1.06154	1.13847	0.957337	0.663492	0.419156	0.256291	0.135895	0.99202	1.4596	1.01136	1.17193	0.744654	0.445434	0.315538	0.20432
O95801	TTC4	18	18	1	1.0086	0.999079	0.978647	0.714459	0.403901	0.0990956	0.033016	1	1.01478	1.03564	0.975716	0.726538	0.42148	0.148627	0.0334259	13.7144	-0.146881	0	0.993664	13.9039	-0.138165	0	0.993784	Yes	Yes	Yes	Yes	14	14	0.99202	0.997376	0.894151	0.729418	0.427397	0.185495	0.117556	0.0581275	0.99202	0.975864	0.982143	0.750101	0.469088	0.179988	0.114524	0.0739876
O95807	TMEM50A	1	1	1	0.959428	1.08995	1.12428	0.757929	0.835718	0.859281	0.775668	1	0.988388	1.07124	1.04771	0.724223	0.731394	0.829988	0.778374		-0.0832797	0.805202	0.731343		-0.138648	0.764792	0.891555	Yes	Yes
O95816	BAG2	22	22	1	0.987308	0.983542	0.944655	0.690021	0.648683	0.730738	0.850118	1	0.95963	1.02563	0.970365	0.749091	0.618131	0.636162	0.709595		-0.753089	0.72989	0.844467		-0.113582	0.65357	0.96134	Yes	Yes			30	30	0.99202	0.961843	0.946935	0.899218	0.966511	0.894974	0.762288	0.644247	0.99202	1.02616	0.941897	0.918509	1.02157	0.926143	0.752326	0.551923
O95817	BAG3	31	31	1	0.916317	1.01502	0.99253	0.752234	0.843221	0.983339	1.01161	1	0.942356	0.983359	0.950235	0.791015	0.763215	0.813398	0.809105		-0.276058	0.897601	0.194892		-0.515582	0.794183	0.920487	Yes	Yes			45	45	0.99202	0.956395	0.931763	0.940763	0.866984	0.824641	0.793884	0.832057	0.99202	0.946262	0.991047	0.936362	1.04251	0.9585	0.8467	0.812771
O95819	MAP4K4	10	10	1	1.03158	0.968021	0.836656	0.435359	0.139186	0.0751561	0.0562377	1	1.00239	0.983872	0.835619	0.40979	0.14586	0.0784176	0.0620883	11.3605	-0.158893	0	0.997414	11.2511	-0.161443	0.00921294	0.999399	Yes	Yes	Yes	Yes
O95822	MLYCD	7	7	1	0.91134	0.947521	0.921112	0.741426	0.800875	0.646801	0.115524	1	1.02494	1.03607	1.03671	0.836139	0.786071	0.681408	0.162528	18.2462	-0.137695	0	0.803886	18.4887	-0.124342	0	0.901025	Yes	Yes	Yes	Yes	3	3	0.99202	0.936338	0.836486	0.707799	0.400293	0.226429	0.157661	0.0844387	0.99202	0.955242	0.92928	0.704202	0.351134	0.20878	0.136596	0.0944407
O95825	CRYZL1	15	15	1	1.02592	1.01862	0.974463	0.832444	0.940404	1.13641	1.11552	1	0.995975	1.02914	0.953013	0.862239	0.818616	0.923511	0.942861		0.0577783	1.12035	0.470398		-0.27376	0.886807	0.704555	Yes	Yes			14	14	0.99202	0.985256	0.985856	0.922374	0.90605	0.869583	0.78237	0.459857	0.99202	0.953321	0.962512	0.894122	0.97664	0.882874	0.772167	0.435095
O95831	AIFM1	41	41	1	0.946171	0.974617	0.933972	0.682414	0.557733	0.446742	0.34239	1	0.988317	1.04122	0.982725	0.746598	0.540187	0.440379	0.326994	15.9682	-0.0671939	0.138948	0.98766	15.7757	-0.0820437	0.235994	0.992976	Yes	Yes	Yes	Yes	46	46	0.99202	0.924755	0.848753	0.729762	0.597167	0.47034	0.347511	0.189659	0.99202	0.957774	0.874426	0.744959	0.655362	0.484463	0.348054	0.189468
O95833	CLIC3	10	10	1	0.940361	1.00427	0.988725	0.748042	0.761782	0.754255	0.357864	1	0.988391	0.992834	0.98851	0.857401	0.749315	0.657402	0.353563	20.6421	-0.0478238	0	0.814819	19.2884	-0.0628931	0	0.957282	Yes	Yes	Yes	Yes	9	9	0.99202	1.01866	0.895972	0.78384	0.498126	0.286959	0.167385	0.107234	0.99202	1.03853	1.00748	0.827539	0.595908	0.275228	0.180135	0.122222
O95834-3	EML2	17	17	1	1.11575	1.12701	1.11767	0.881025	0.727384	0.148411	0.0285589	1	1.00647	1.03943	0.990896	0.826349	0.672886	0.176158	0.0287832	15.9489	-0.234163	0	0.959213	15.7322	-0.181462	0	0.977643	Yes	Yes	Yes	Yes	20	20	0.99202	0.999953	0.905601	0.905615	0.772433	0.413784	0.164573	0.088288	0.99202	0.974277	0.980877	0.894438	0.82068	0.423522	0.185092	0.0994415
O95835	LATS1	4	4	1	1.00908	0.980661	0.849052	0.561231	0.331684	0.246478	0.244439	1	1.0224	1.07313	0.9607	0.643277	0.396982	0.263321	0.21077	12.4892	-0.112022	0.157055	0.998036	13.4709	-0.118026	0.156083	0.992907	Yes	Yes	Yes	Yes	3	3	0.99202	0.764135	0.588057	0.350269	0.216305	0.186862	0.144839	0.116455	0.99202	0.828909	0.522537	0.373327	0.221234	0.172592	0.142993	0.117418
O95848	NUDT14	1	1	1	0.903483	1.08892	0.93116	0.719097	0.766714	0.573117	0.440012	1	0.920564	1.0015	0.980873	0.759694	0.658799	0.508975	0.40361	20.1841	-0.0458933	0	0.8925	18.1063	-0.056914	0.0727395	0.974039	Yes	Yes	Yes	Yes	1	1	0.99202	1.05751	0.702414	0.984696	0.853288	0.726014	0.706099	0.123463	0.99202	0.97998	1.10207	1.00333	0.583543	0.65151	0.492669	0.155512
O95858	TSPAN15	2	2	1	0.946951	0.981617	0.97217	0.775484	0.782586	0.978137	0.903071	1	0.931549	1.12434	0.964212	0.809039	0.816273	0.829407	0.710013		-0.352752	0.859819	0.437137		-0.0550696	0.776049	0.767132	Yes	Yes			4	4	0.99202	1.06478	0.915962	0.91676	0.773675	0.78583	0.701747	0.649899	0.99202	0.981913	1.0182	0.870121	0.85298	0.768561	0.67708	0.649178
O95861	BPNT1	23	23	1	1.12501	1.15902	1.11618	0.943273	1.0928	1.27011	1.05	1	1.00261	1.03184	1.02677	0.886432	0.879114	0.903277	0.837946		0.336063	1.16006	-0.166271		-0.138236	0.873445	0.905635	Yes	Yes			21	21	0.99202	0.969071	0.957911	0.873267	0.903996	0.789809	0.485442	0.115913	0.99202	0.94101	0.944164	0.850679	0.926336	0.777155	0.461748	0.126683
O95865	DDAH2	5	5	1	1.02741	1.01776	0.921902	0.902957	1.02855	1.05471	0.630342	1	1.07076	1.07824	1.01385	0.957639	0.926168	0.945773	0.698824		0	0	0.849364			0	0.821802	Yes	Yes			8	8	0.99202	0.967193	0.965861	0.90855	0.894667	0.746951	0.55892	0.250673	0.99202	0.86631	0.919351	0.879472	0.978386	0.770441	0.527591	0.251379
O95870	ABHD16A	6	6	1	0.950948	0.968669	0.889725	0.451608	0.207884	0.114331	0.0542262	1	1.00218	0.998709	0.850074	0.486946	0.201873	0.0789853	0.0598112	11.7179	-0.153284	0.0200604	0.996837	11.748	-0.146432	0	0.998916	Yes	Yes	Yes	Yes	3	3	0.99202	0.822973	0.535817	0.417016	0.351039	0.255073	0.152332	0.120548	0.99202	0.783359	0.604581	0.45238	0.342254	0.251723	0.168764	0.115907
O95873	C6orf47	2	2	1	0.960185	0.991086	0.970659	0.725199	0.607439	0.389832	0.373345	1	0.946772	0.948519	0.923286	0.659742	0.520979	0.338967	0.289912	16.1893	-0.0736536	0.203078	0.984717	14.8138	-0.0762328	0.0537959	0.987121	Yes	Yes	Yes	Yes	3	3	0.99202	0.889353	0.919061	0.834564	0.716375	0.614692	0.580519	0.659016	0.99202	0.997586	0.979442	0.816948	0.868577	0.70411	0.65776	0.629686
O95881	TXNDC12	24	24	1	0.912952	1.0243	1.00487	0.799646	0.923867	1.05021	0.958489	1	1.03042	1.03072	1.04346	0.88439	0.915318	1.04876	0.999238		-0.0424662	0.933535	0.0968956		-0.0102306	0.966327	0.15285	Yes	Yes			33	33	0.99202	0.987445	0.882373	0.905961	0.81161	0.702603	0.586308	0.529956	0.99202	0.910402	0.989084	0.910366	1.02743	0.887045	0.697637	0.597351
O95900	TRUB2	5	5	1	0.991221	1.00792	0.9169	0.560462	0.33148	0.107088	0.034982	1	0.99921	0.995511	0.910497	0.608532	0.320578	0.15161	0.080873	12.6228	-0.13492	0	0.994465	12.8919	-0.125753	0	0.999331	Yes	Yes	Yes	Yes	3	3	0.99202	0.910272	0.736368	0.468707	0.321544	0.163427	0.105046	0.0657839	0.99202	0.982576	0.688835	0.523248	0.270793	0.175059	0.104114	0.0785334
O95905-3	ECD	13	13	1	1.04706	1.10568	0.983723	0.606624	0.275611	0.126026	0.0534729	1	1.00915	1.01674	0.979748	0.597168	0.272877	0.094687	0.0591947	12.8329	-0.15056	0.00982332	0.989213	12.7562	-0.153361	0.00350335	0.99855	Yes	Yes	Yes	Yes	13	13	0.99202	0.907722	0.739422	0.552012	0.348679	0.226784	0.147081	0.0963643	0.99202	0.927605	0.73274	0.570507	0.37878	0.260426	0.191629	0.11994
O95926	SYF2	6	6	1	0.916945	0.979433	0.953196	0.690844	0.524814	0.302362	0.203402	1	0.97947	0.982106	0.957061	0.707176	0.473921	0.292252	0.153036	14.7222	-0.0875034	0	0.984618	14.4341	-0.0971934	0	0.996943	Yes	Yes	Yes	Yes	5	5	0.99202	0.963435	1.0632	1.00062	0.937147	0.885371	0.872624	0.878639	0.99202	0.968103	1.11454	0.963834	0.970518	0.856239	0.798362	0.674197
O95983	MBD3	13	13	1	1.01436	1.05558	0.996206	0.713693	0.480119	0.223144	0.0895789	1	1.02744	1.02498	0.975945	0.691591	0.445651	0.216288	0.0737892	14.2856	-0.115303	0	0.990495	13.9792	-0.117076	0	0.993361	Yes	Yes	Yes	Yes	9	9	0.99202	0.962724	0.833711	0.60046	0.401713	0.355863	0.398664	0.403803	0.99202	0.937141	0.797833	0.579579	0.406297	0.353704	0.353037	0.341814
O95985	TOP3B	13	13	1	0.991053	0.950557	0.772807	0.417626	0.200226	0.10173	0.053813	1	1.0197	0.986074	0.812831	0.380337	0.188064	0.0771586	0.042766	11.1167	-0.137472	0	0.997952	11.1166	-0.152759	0	0.999173	Yes	Yes	Yes	Yes	14	14	0.99202	0.971974	0.902605	0.724074	0.505996	0.359908	0.252354	0.132256	0.99202	0.982578	0.852912	0.736353	0.528561	0.431099	0.279547	0.143637
O95989	NUDT3	7	7	1	0.98133	1.05239	1.07587	0.813027	0.888881	0.996783	0.92891	1	1.00928	1.04109	0.992181	0.848508	0.741271	0.729388	0.793568		-0.0356661	0.909235	0.436221		-0.842805	0.754742	0.964798	Yes	Yes			7	7	0.99202	0.937891	0.962608	0.868235	0.806314	0.663179	0.558744	0.267652	0.99202	0.879907	0.904295	0.876258	0.922578	0.76222	0.526639	0.330306
O95999	BCL10	9	9	1	1.01489	1.03	1.02735	0.763153	0.803662	0.800879	0.565188	1	1.0184	1.03218	1.00588	0.796914	0.733647	0.652626	0.456497		-0.0309002	0	0.830856	20.8942	-0.0461787	0	0.961487	Yes	Yes		Yes	11	11	0.99202	0.947067	0.907044	0.87266	0.832617	0.770338	0.734342	0.744509	0.99202	0.964298	0.979943	0.896989	1.0053	0.868464	0.813228	0.706689
O96000	NDUFB10	16	16	1	0.967258	0.979681	0.909709	0.652001	0.47063	0.229636	0.0883397	1	1.0013	1.04678	0.941375	0.708731	0.487407	0.228593	0.0867487	13.7925	-0.104689	0	0.987208	14.2331	-0.111026	0	0.989935	Yes	Yes	Yes	Yes	13	13	0.99202	0.964012	0.867439	0.610169	0.368809	0.244051	0.181511	0.117894	0.99202	0.926189	0.833701	0.601517	0.380643	0.259275	0.177576	0.131313
O96005	CLPTM1	25	25	1	1.03505	1.02576	0.97597	0.680137	0.485476	0.277638	0.0879727	1	1.04954	1.07819	0.988167	0.7286	0.469394	0.254285	0.100851	14.2482	-0.104876	0	0.987219	14.3844	-0.111565	0	0.988147	Yes	Yes	Yes	Yes	24	24	0.99202	0.964	0.879039	0.739634	0.589114	0.457588	0.337527	0.221626	0.99202	0.957124	0.819973	0.675438	0.554861	0.392402	0.287217	0.20467
O96006	ZBED1	3	3	1	1.06412	1.19542	1.16563	0.840961	0.634408	0.363804	0.107303	1	1.04289	1.17251	1.0866	0.811461	0.597144	0.279672	0.171375	16.0474	-0.11521	0	0.925865	15.5685	-0.108836	0	0.955111	Yes	Yes	Yes	Yes	4	4	0.99202	0.977802	0.961383	0.96244	0.576748	0.41236	0.268397	0.150117	0.99202	0.929062	0.947663	0.695759	0.515391	0.342762	0.203499	0.148567
O96007	MOCS2	5	5	1	1.0112	1.00869	0.995918	0.778385	0.766092	0.779263	0.806266	1	0.966634	1.00589	0.924119	0.715489	0.66689	0.641931	0.64535		-0.589675	0.782501	0.989278		-0.0837146	0.641082	0.993662	Yes	Yes			3	3	0.99202	0.882011	0.893228	0.840943	0.813335	0.760617	0.747894	0.82193	0.99202	0.916374	0.94802	0.851955	0.991262	0.863359	0.811885	0.773531
O96008	TOMM40	25	25	1	1.08096	1.10273	1.05666	0.905996	0.861573	0.867899	0.591258	1	1.01612	1.05035	0.976317	0.799005	0.684241	0.563346	0.435295		-0.0488343	0	0.811495	19.2709	-0.0514527	0.00805578	0.986551	Yes	Yes		Yes	29	29	0.99202	0.926071	0.845234	0.707099	0.538565	0.371311	0.267168	0.164519	0.99202	0.990067	0.840482	0.705571	0.525299	0.367672	0.239447	0.158292
O96011	PEX11B	5	5	1	1	1.01884	0.878217	0.559149	0.207845	0.0739243	0.036527	1	1.10509	1.06145	0.924043	0.492256	0.207585	0.097945	0.0452168	12.2213	-0.155194	0	0.996998	12.0049	-0.160144	0.0120689	0.989528	Yes	Yes	Yes	Yes	6	6	0.99202	0.920374	0.625054	0.398755	0.31678	0.209859	0.139993	0.0778487	0.99202	1.01702	0.690669	0.490571	0.248174	0.189007	0.120345	0.059029
O96013	PAK4	13	13	1	1.0089	1.01264	1.01926	0.763432	0.478961	0.1168	0.0507594	1	0.974757	0.998911	0.967397	0.754091	0.479798	0.142943	0.0674234	14.2968	-0.144513	0	0.990021	14.275	-0.133722	0	0.991411	Yes	Yes	Yes	Yes	10	10	0.99202	0.950504	0.824664	0.399121	0.234051	0.150486	0.137177	0.0899519	0.99202	0.938079	0.803205	0.476621	0.25547	0.183344	0.141077	0.0882354
O96015	DNAL4	1	1	1	1.02196	0.954499	0.936136	0.638443	0.395385	0.204725	0.123145	1	0.997484	1.03184	0.975197	0.759438	0.432243	0.283198	0.173871	13.4671	-0.109913	0	0.996406	14.3699	-0.113142	0.0860058	0.998153	Yes	Yes	Yes	Yes
O96017-9	CHEK2	12	12	1	0.982199	1.0466	0.997047	0.67384	0.382524	0.159904	0.0618422	1	0.99121	0.993007	0.930538	0.60212	0.30181	0.126267	0.0626678	13.5663	-0.131947	0	0.994631	12.814	-0.13618	0	0.999271	Yes	Yes	Yes	Yes	10	10	0.99202	0.954217	0.928398	0.742123	0.545937	0.343274	0.270561	0.164947	0.99202	0.941216	0.896505	0.735458	0.519446	0.335094	0.238411	0.165644
O96018	APBA3	3	3	1	0.920022	1.01924	0.977715	0.640299	0.337835	0.268007	0.168502	1	0.81261	1.10005	0.742003	0.604319	0.386142	0.213853	0.0922483	13.1646	-0.137463	0.159356	0.990007	12.5808	-0.0990881	0	0.928206	Yes	Yes	Yes	Yes	2	2	0.99202	1.07399	0.851678	0.848631	0.674628	0.438129	0.398822	0.270046	0.99202	0.885014	0.909562	0.735189	0.566876	0.40602	0.303747	0.21369
O96019	ACTL6A	22	22	1	1.0273	1.02167	0.936617	0.676846	0.6303	0.698696	0.469041	1	0.993252	1.01289	0.927225	0.675103	0.535215	0.516286	0.406448		-0.0780359	0.561771	0.916857	16.3693	-0.080839	0.393558	0.991276	Yes	Yes			18	18	0.99202	0.913912	0.779898	0.688321	0.569594	0.369799	0.226291	0.11955	0.99202	0.917501	0.757068	0.685118	0.615117	0.380171	0.23744	0.130667
O96020	CCNE2	3	3	1	0.967059	1.00671	1.02053	0.654677	0.355865	0.257288	0.160155	1	0.919525	1.03697	0.964082	0.647534	0.37857	0.238646	0.0876846	13.3169	-0.140974	0.154707	0.993875	13.5418	-0.114046	0	0.988477	Yes	Yes	Yes	Yes	4	4	0.99202	0.974572	0.931733	0.755249	0.59719	0.423836	0.290247	0.162925	0.99202	0.954765	0.86857	0.737515	0.537224	0.342634	0.264919	0.135172
O96028	WHSC1	5	5	1	1.02629	0.999279	0.789695	0.385573	0.210278	0.166167	0.0703747	1	0.938312	0.94205	0.772553	0.383382	0.217718	0.124815	0.0777384	11.0765	-0.142584	0.0463246	0.997537	11.0272	-0.132106	0	0.994251	Yes	Yes	Yes	Yes	3	3	0.99202	0.956386	0.740414	0.677089	0.507569	0.348731	0.312169	0.337116	0.99202	0.912203	0.673474	0.673509	0.498343	0.389156	0.29667	0.239394
P00156	MT-CYB	1	1	1	0.836625	0.935533	1.03393	0.707137	0.598645	0.570267	0.240794	1	1.01939	1.12896	0.916958	0.692084	0.564622	0.438637	0.167549	16.7768	-0.0663441	0	0.858991	15.3165	-0.0777635	0	0.951968	Yes	Yes	Yes	Yes
P00167	CYB5A	5	5	1	1.0639	1.06133	1.07562	0.851185	1.04181	1.18937	1.13584	1	1.08186	1.08587	1.04778	0.903724	0.959805	0.926919	0.933135		0.381626	1.1626	0.468029		-0.0318821	0.93081	0.49278	Yes	Yes			5	5	0.99202	0.888363	1.10211	1.27952	1.17602	1.11806	1.07986	0.908883	0.99202	0.994641	1.12148	0.991169	0.9826	1.00315	0.831565	0.770932
P00338-3	LDHA	129	129	1	1.02493	1.03122	1.00201	0.875076	0.881204	0.697273	0.240097	1	1.01716	1.0017	0.955095	0.833371	0.755341	0.561141	0.236182	19.0749	-0.149474	0	0.952373	17.8471	-0.0834771	0	0.957545	Yes	Yes	Yes	Yes	182	182	0.99202	0.987305	0.956433	0.919937	0.955157	0.891032	0.815603	0.680701	0.99202	0.980661	1.00175	0.932556	0.966159	0.882072	0.786314	0.585243
P00367	GLUD1	78	78	1	1.01224	1.05156	1.0119	0.805326	0.881259	0.988618	0.878736	1	0.991378	1.05414	1.00241	0.849072	0.828198	0.910226	0.803429		-0.0929303	0.888548	0.616555		-0.322253	0.847284	0.852179	Yes	Yes			74	74	0.99202	0.94713	0.89338	0.856326	0.825085	0.57005	0.138853	0.0648432	0.99202	0.929283	0.903987	0.861672	0.888654	0.608192	0.160995	0.0773934
P00374	DHFR	13	13	1	0.992379	1.128	0.852361	0.517674	0.21177	0.0761843	0.0372902	1	0.982728	0.93834	0.83557	0.479871	0.196504	0.0830451	0.0395901	11.9378	-0.148848	0	0.985632	11.6403	-0.146277	0	0.995309	Yes	Yes	Yes	Yes	12	12	0.99202	0.812205	0.638252	0.425614	0.247713	0.158681	0.103947	0.0524649	0.99202	0.816416	0.596491	0.416665	0.233944	0.157912	0.111049	0.0698063
P00387-3	CYB5R3	37	37	1	0.986928	1.01714	1.02573	0.825963	0.837576	0.705238	0.302685	1	1.02326	1.07198	1.04813	0.876034	0.835157	0.697774	0.377236	19.2733	-0.0953299	0	0.907619	19.7939	-0.0770046	0	0.938206	Yes	Yes	Yes	Yes	29	29	0.99202	0.940048	0.863998	0.606776	0.259616	0.133029	0.0903398	0.0441755	0.99202	0.949834	0.868535	0.608528	0.266564	0.14844	0.0993405	0.0535214
P00390	GSR	38	38	1	0.830656	0.769111	0.658618	0.519948	0.588229	0.714135	0.70722	1	0.894799	0.767059	0.638593	0.514606	0.512822	0.521667	0.538807		-0.222062	0.63702	0.63665	20.7455	-0.0734742	0.0358494	0.970271	Yes	Yes		Yes	73	73	0.99202	0.907889	0.893964	0.901441	0.879454	0.856643	0.797231	0.848275	0.99202	0.922107	0.908125	0.902604	1.07886	1.0189	0.795554	0.870594
P00403	MT-CO2	16	16	1	0.843719	0.943336	0.855845	0.460174	0.27443	0.0625427	0.0222202	1	1.12022	1.02655	0.994512	0.707472	0.316283	0.137445	0.0390956	11.7537	-0.142576	0	0.968957	13.4426	-0.151737	0	0.988097	Yes	Yes	Yes	Yes	15	15	0.99202	0.87668	0.679466	0.456172	0.338186	0.21814	0.14821	0.0687511	0.99202	0.920135	0.724344	0.501211	0.338015	0.204553	0.14197	0.091535
P00439	PAH	2	2	1	1.05131	0.988418	1.07478	0.697547	0.455469	0.300734	0.124172	1	1.07964	1.14395	1.1152	0.873853	0.536638	0.286215	0.130107	14.423	-0.106425	0.00769621	0.978696	15.3839	-0.125051	0.0234945	0.962026	Yes	Yes	Yes	Yes
P00441	SOD1	19	19	1	1.01721	1.1284	1.07525	0.910857	1.23655	1.45839	1.58586	1	1.03327	1.02697	1.04414	0.891805	0.978532	1.17465	1.34459		0.184979	1.5	0.900005		0.538859	1.34459	0.881582	Yes	Yes			17	17	0.99202	0.992191	0.857533	0.875678	0.967483	0.840148	0.866984	0.967808	0.99202	0.971387	0.848632	0.900535	1.08295	0.963511	0.930321	0.832054
P00480	OTC	2	2	1	1.21203	1.03516	1.14124	0.927929	0.691584	0.174668	0.0806786	1	0.87882	0.941392	1.13111	1.19937	1.02093	0.328863	0.0831882	15.856	-0.215983	0.0442579	0.946768	17.8965	-1.83885	0.0831883	0.932332	Yes	Yes	Yes	Yes	8	8	0.99202	1.00152	0.989763	0.953305	0.645636	0.359696	0.34879	0.213505	0.99202	0.827128	0.926156	0.901031	0.82309	0.4147	0.380311	0.212161
P00491	PNP	61	61	1	1.00597	0.985006	1.00154	0.815163	0.953775	1.07608	0.697993	1	1.02406	1.07624	1.03587	0.86066	0.885048	0.895833	0.627855			0	0.602679		-0.0374971	0	0.773636	Yes	Yes			63	63	0.99202	0.973858	0.930427	0.910453	0.874767	0.794201	0.731057	0.709357	0.99202	0.961488	1.01459	0.892878	0.898698	0.829692	0.732588	0.629546
P00492	HPRT1	32	32	1	1.01028	1.04146	1.03048	0.875416	0.970886	1.15804	1.13949	1	0.976331	1.01517	0.961945	0.837215	0.82182	0.856026	0.823468		0.0979176	1.15073	0.658991		-0.0885309	0.83394	0.969077	Yes	Yes			39	39	0.99202	0.974879	0.947105	0.905284	0.906288	0.832163	0.805106	0.780936	0.99202	0.938355	0.994771	0.878331	0.929613	0.861921	0.747345	0.67719
P00505	GOT2	59	59	1	1.06003	1.09983	1.0723	0.881895	1.04895	1.28319	1.23009	1	0.991671	1.04069	1.04138	0.901681	0.897019	0.988662	1.00776		0.645424	1.25664	0.692607		-0.0212448	0.949534	0.348294	Yes	Yes			67	67	0.99202	0.934562	0.915802	0.9122	0.927403	0.902368	0.854173	0.881924	0.99202	0.966664	0.953954	0.903159	0.955551	0.880135	0.800464	0.757075
P00519-2	ABL1	4	4	1	0.991566	1.21857	0.948194	0.603095	0.379618	0.250175	0.208963	1	0.983833	0.992983	0.976221	0.581744	0.327668	0.246013	0.193006	13.0943	-0.124237	0.167759	0.953729	12.7024	-0.152083	0.19074	0.998376	Yes	Yes	Yes	Yes	3	3	0.99202	0.96172	0.772722	0.5483	0.41165	0.259989	0.242771	0.163277	0.99202	0.867098	0.624232	0.492495	0.35392	0.298232	0.195252	0.113756
P00533	EGFR	45	45	1	1.07928	1.12121	1.03867	0.767444	0.574855	0.327653	0.113947	1	1.01641	1.0859	1.03143	0.762437	0.539872	0.289754	0.11455	15.3281	-0.104434	0	0.965585	15.0128	-0.108234	0	0.983205	Yes	Yes	Yes	Yes	44	44	0.99202	0.923703	0.838845	0.702638	0.547544	0.415675	0.330287	0.239642	0.99202	0.900898	0.818357	0.697414	0.577769	0.413659	0.32501	0.236049
P00558	PGK1	212	212	1	0.985086	1.04934	0.985685	0.840184	0.994635	0.952063	0.30663	1	1.04356	1.04706	1.00041	0.86595	0.865083	1.04259	0.393749	20.2751	-0.293509	0	0.931212	20.9407	0	0	0.876504	Yes	Yes	Yes	Yes	157	157	0.99202	0.980521	0.932931	0.904031	0.764088	0.356061	0.205045	0.121109	0.99202	0.958094	0.97926	0.890659	0.828232	0.36755	0.205262	0.121537
P00568	AK1	16	16	1	0.97858	1.04447	0.956656	0.834259	0.865231	0.605481	0.0992534	1	1.02598	0.997188	0.953615	0.839994	0.747784	0.512655	0.119649	18.3472	-0.19621	0	0.936572	17.256	-0.112076	0	0.95154	Yes	Yes	Yes	Yes	15	15	0.99202	0.997655	0.929088	0.882977	0.760935	0.498017	0.315943	0.196536	0.99202	0.966649	1.0115	0.863778	0.833766	0.582991	0.336151	0.209308
P00746	CFD	1	1	1	1.04286	0.977075	0.881168	0.644601	0.46177	0.357952	0.213247	1	0.862582	0.98115	0.849595	0.665172	0.360283	0.308846	0.138372	14.2176	-0.0793177	0	0.99409	13.4702	-0.0941528	0	0.964289	Yes	Yes	Yes	Yes
P00749	PLAU	4	4	1	0.974463	1.0669	1.01527	0.724923	0.566504	0.52546	0.313145	1	0.987643	1.09594	0.994938	0.661531	0.52084	0.391761	0.223339	16.57	-0.0701618	0.175717	0.960625	14.9822	-0.0821436	0.0490203	0.971935	Yes	Yes	Yes	Yes	4	4	0.99202	0.904413	0.910879	0.832203	0.704715	0.593653	0.413127	0.22079	0.99202	0.98456	0.966715	0.863101	0.883147	0.63105	0.383856	0.224278
P00813	ADA	18	18	1	0.995416	1.02839	1.01809	0.812691	0.900053	1.01538	1.02808	1	0.976006	1.00025	0.986587	0.898542	0.82749	0.843106	0.845918		-0.0305631	0.940456	0.213057		-0.330846	0.838838	0.976641	Yes	Yes			17	17	0.99202	0.98273	0.93711	0.858875	0.761561	0.726222	0.622744	0.468182	0.99202	0.953492	0.968038	0.905705	0.945303	0.788988	0.650255	0.480144
P00846	MT-ATP6	3	3	1	1.55265	1.77338	1.48142	1.10663	0.792388	0.367414	0.113278	1	1.07573	1.1021	0.97233	0.719501	0.457714	0.226783	0.0635717	17.0148	-0.166599	0.0142651	0.515332	14.1737	-0.118758	0	0.980662	Yes	Yes		Yes	2	2	0.99202	0.930361	0.642215	0.574302	0.298591	0.181559	0.186854	0.118209	0.99202	1.0809	0.885945	0.529394	0.427541	0.299092	0.134764	0.111597
P00918	CA2	18	18	1	0.974864	1.00048	1.00003	0.830326	1.01691	1.14335	0.74351	1	1.01783	1.02812	0.989924	0.859714	0.889062	0.941923	0.720832		0	0	0.523597		-0.0169942	0	0.694352	Yes	Yes			19	19	0.99202	0.995757	0.997401	0.956434	0.884796	0.582971	0.2562	0.159136	0.99202	0.966268	0.97593	0.923707	0.890197	0.565287	0.23814	0.144947
P00966	ASS1	15	15	1	1.00858	0.959662	0.896689	0.500994	0.251435	0.170176	0.132607	1	0.993709	1.00139	0.904936	0.53403	0.264022	0.1642	0.115307	12.0078	-0.145453	0.094523	0.998502	12.2755	-0.138097	0.0628365	0.999935	Yes	Yes	Yes	Yes	16	16	0.99202	0.938953	0.795467	0.54485	0.358908	0.275297	0.241235	0.168233	0.99202	0.924007	0.740656	0.546976	0.381028	0.280071	0.230764	0.156144
P01008	SERPINC1	14	14	1	1.03048	0.988176	0.972288	0.844618	0.905333	0.833256	0.393567	1	0.994109	1.02971	0.988006	0.89156	0.835333	0.760739	0.37546	20.2763	-0.146435	0	0.890841	20.0247	-0.0877656	0	0.927186	Yes	Yes	Yes	Yes	18	18	0.99202	0.938201	0.90265	0.900925	0.859292	0.796423	0.774729	0.676953	0.99202	0.990214	0.985994	0.878732	0.947739	0.854261	0.766559	0.635451
P01033	TIMP1	4	4	1	1.24954	1.26431	1.21747	1.02674	1.07989	1.22518	1.09319	1	1.00472	1.14754	1.01545	0.851911	0.804407	0.857682	0.779932			1.33037	0.303091		-0.46021	0.814007	0.780328	Yes	Yes			5	5	0.99202	0.966244	0.89979	0.916836	0.865336	0.773308	0.770594	0.697955	0.99202	0.949013	0.961925	0.910333	0.905372	0.822006	0.727298	0.642558
P01034	CST3	5	5	1	0.97322	1.08607	1.04579	0.865276	0.975968	1.09657	1.14034	1	0.912474	0.987946	1.03494	0.849867	0.895413	1.00858	0.953506		0.122599	1.035	0.0586552		-0.0273994	0.928741	0.128621	Yes	Yes			8	8	0.99202	0.991095	0.970105	0.986843	0.959095	0.929567	0.853335	0.801823	0.99202	0.988658	1.04277	0.936128	0.955594	0.891158	0.75831	0.661105
P01036	CST4	1	1	1	1.03658	1.12897	1.25882	1.17589	1.13679	1.60931	1.53807	1	0.624767	1.42646	1.19066	0.833896	0.70011	0	0		0.0513231	1.5	0.60119	15.2745	-0.759761	0	0.791945	Yes	Yes
P01106-2	MYC	2	2	1	0.987855	0.913368	0.917584	0.519633	0.286721	0.115038	0.0553854	1	1.08728	1.04831	0.94704	0.593673	0.298213	0.132778	0.0612802	12.3118	-0.13636	0	0.991518	12.8021	-0.13734	0	0.991733	Yes	Yes	Yes	Yes
P01111	NRAS	17	17	1	0.982178	1.0153	1.00333	0.799662	0.813907	0.889328	0.781401	1	1.02264	1.06106	1.03336	0.849135	0.764936	0.754819	0.702528		-0.233612	0.821065	0.897746		-0.073218	0.731889	0.951368	Yes	Yes			11	11	0.99202	0.973029	0.941365	0.886045	0.752455	0.530918	0.337218	0.199389	0.99202	0.882525	0.896387	0.789889	0.740605	0.547767	0.361955	0.198609
P01112	HRAS	2	2	1	1.33191	1.36144	1.48609	1.11089	1.13441	1.36424	0.890224	1	0.999824	1.02172	1.03381	0.914759	0.689491	0.611648	0.568259			1.47977	0.168004		-0.0834098	0.56429	0.992747	Yes	Yes			3	3	0.99202	0.966203	0.928396	0.896553	0.773343	0.627074	0.385683	0.214398	0.99202	0.956858	0.829132	0.754859	0.546045	0.450875	0.289392	0.168382
P01116-2	KRAS	3	3	1	0.98617	0.981914	0.937511	0.684317	0.558291	0.517869	0.473017	1	1.06216	1.03639	0.984207	0.768433	0.640348	0.578629	0.465058	18.5868	-0.0874234	0.464812	0.997383	20.3834	-0.0609678	0.392001	0.976363	Yes	Yes			2	2	0.99202	0.949747	0.769274	0.453317	0.332546	0.241931	0.119756	0.0570668	0.99202	1.00941	0.871659	0.618922	0.412952	0.23843	0.126062	0.0763042
P01130	LDLR	17	17	1	0.954498	0.985978	0.965175	0.712138	0.637966	0.541392	0.317284	1	0.984604	1.04262	1.04535	0.859326	0.75365	0.615497	0.353273	17.3401	-0.058792	0	0.962375	18.9656	-0.0669941	0	0.966083	Yes	Yes	Yes	Yes	17	17	0.99202	0.949184	0.846486	0.863103	0.710209	0.624056	0.592776	0.575726	0.99202	0.896239	0.86922	0.882545	0.954605	0.84976	0.768001	0.703187
P01137	TGFB1	3	3	1	1.05875	0.972368	0.935798	0.739946	0.672297	0.587607	0.386305	1	1.05598	1.09113	1.01652	0.786767	0.660777	0.528894	0.33981	18.9099	-0.0499422	0	0.964702	17.7507	-0.063206	0	0.963886	Yes	Yes	Yes	Yes	4	4	0.99202	1.00545	0.894334	0.756601	0.699542	0.595136	0.487875	0.37638	0.99202	0.903109	0.853194	0.764197	0.755988	0.582456	0.457217	0.368573
P01857	IGHG1	3	3	1	1.05686	0.951985	1.08185	0.915661	1.19539	8.79277	1.88401	1	1.46243	1.38662	1.29896	0.839415	1.26872	0.938599	0.833807		1.18839	1.5	-0.031686		-0.290928	0.833809	-0.224188	Yes	Yes			3	3	0.99202	1.39594	1.00131	0.86933	1.03041	0.96996	0.858158	0.952241	0.99202	0.697901	0.811946	1.01144	0.98125	0.944909	0.83632	0.399022
P01876	IGHA1	4	4	1	1.00091	0.951236	1.02097	0.832377	1.76946	1.087	1.33258	1	1.68628	0.87763	0.874035	0.670618	0.917019	1.0969	0.790486		0.288659	1.39483	0.553703		-0.170032	0.869811	0.147522	Yes	Yes			2	2	0.99202	0.923959	0.823635	0.891624	0.930725	0.788045	0.613111	0.64809	0.99202	1.20273	0.800069	1.47759	0.982393	1.21924	1.04122	0.685665
P01892	HLA-A	8	8	1	0.974255	1.01389	1.05768	0.834416	0.873584	0.799851	0.621724	1	1.0481	1.12926	1.10104	0.877553	0.843755	0.681489	0.578103		-0.0324891	0	0.85937		-0.0453779	0.260123	0.87404	Yes	Yes			9	9	0.99202	0.950145	0.978405	0.832843	0.780286	0.721567	0.613714	0.490072	0.99202	0.982096	0.962363	0.865452	0.846749	0.750808	0.584703	0.473971
P02042	HBD	1	1	1	0.874115	0.97124	0.980514	0.733178	0.98989	1.21581	0.9301	1	1.25136	1.28282	1.08955	1.09033	0.931064	1.03671	0.99331		-0.0343573	0.969898	-0.0490128			1.1929	0.0750087	Yes	Yes			3	3	0.99202	1.2602	0.964746	1.08581	1.612	1.13451	0.733352	1.0046	0.99202	0.804813	0.90463	0.80021	0.924787	0.599299	0.567744	0.860263
P02452	COL1A1	1	1	1	37.542	1.29438	6.79687	0.60496	1.11223	0.668707	3.54005	1	0.726877	0.78343	0.632398	0.494309	18.2662	2.33043	0.911214			1.5	-0.182148		0.288079	1.5	-0.0730473	Yes	Yes
P02511	CRYAB	1	1	1	0.720201	0.907376	0.89645	0.476903	0.446281	0.743546	0.349265	1	0.900059	0.894936	0.892703	0.582298	0.359331	0.291275	0.397023		-1.40202	0.503999	0.580486	12.6599	-0.131899	0.315671	0.948466	Yes	Yes
P02545	LMNA	59	59	1	0.9674	0.991393	0.953322	0.762221	0.649398	0.48838	0.184716	1	1.02866	1.01476	0.978169	0.780761	0.601485	0.417617	0.167266	16.4557	-0.077949	0	0.959834	15.9133	-0.087902	0	0.983808	Yes	Yes	Yes	Yes	78	78	0.99202	0.979141	0.943084	0.902394	0.910627	0.838767	0.744373	0.524778	0.99202	0.970184	1.0148	0.918811	0.976689	0.836181	0.712252	0.464363
P02647	APOA1	4	4	1	1.05716	1.09522	1.04852	0.815247	0.775083	0.448155	0.215086	1	1.17518	1.34743	1.31636	0.939006	0.892481	0.572151	0.22968	17.2757	-0.0974488	0	0.951994	18.4591	-0.134437	0	0.747281	Yes	Yes	Yes		3	3	0.99202	0.898203	0.788488	0.866561	0.696844	0.42763	0.260612	0.185604	0.99202	0.846682	0.900576	0.867168	0.722255	0.475034	0.311788	0.179363
P02649	APOE	2	2	1	1.15111	1.09064	1.09646	0.92679	0.968851	1.02247	0.474948	1	0.986528	0.972142	0.897583	0.737716	0.792056	0.637291	0.363806	20.9916	0	0	0.849638	20.0316	-0.0471589	0	0.882821	Yes	Yes	Yes	Yes	1	1	0.99202	1.02566	1.11764	1.08621	1.08417	0.812328	1.00367	0.852838	0.99202	0.862947	0.861407	0.808434	0.864381	0.929917	0.809767	0.635451
P02686	MBP	1	1	1	0.950204	1.06566	0.91613	0.908876	0.810298	0.909087	0.81186	1	0.943184	1.02766	1.0019	0.870912	0.682549	0.593029	0.587359		-0.0298074	0.843576	0.702267		-0.0769982	0.56635	0.982914	Yes	Yes			2	2	0.99202	1.023	0.996434	0.979528	0.755591	0.705169	0.672524	0.767502	0.99202	0.920762	1.0941	0.860416	0.87603	0.817592	0.730402	0.711167
P02786	TFRC	101	101	1	1.01639	1.01639	0.998695	0.835342	0.869183	0.59715	0.0910961	1	1.00564	1.02602	0.980597	0.855038	0.804641	0.566403	0.113802	18.3097	-0.201848	0	0.94598	17.8559	-0.136064	0	0.947968	Yes	Yes	Yes	Yes	130	130	0.99202	0.968083	0.926718	0.883017	0.915829	0.854145	0.821329	0.833475	0.99202	0.961763	0.990952	0.883448	0.99713	0.926923	0.840871	0.779895
P02787	TF	1	1	1	0.905431	0.940817	0.821744	0.722096	1.07256	1.44002	1.55596	1	1.16525	1.35708	1.18594	1.10113	1.19772	1.32055	1.40464		0.172698	1.5	0.792489			1.5	0.461396	Yes	Yes			1	1	0.99202	1.06129	0.964472	0.924698	1.04769	0.7878	0.840874	1.0715	0.99202	0.978091	0.978433	0.85964	1.00407	0.915484	0.859291	0.76386
P02788	LTF	4	4	1	0.848029	0.856311	1.03097	0.702687	0.947488	0.592344	1.27817	1	1.15363	0.98947	1.00572	0.649912	0.523964	0.573949	0.426515						-0.168008	0.502432	0.934685	No	Yes			2	2	0.99202	1.23813	0.779601	0.782194	1.06924	0.557404	0.700026	0.807884	0.99202	1.17044	0.891663	1.01895	0.89665	0.937002	0.939689	0.725015
P02792	FTL	4	4	1	0.978328	0.994406	0.91648	0.698064	0.678657	0.65655	0.520666	1	0.979634	1.00656	0.958705	0.722721	0.553816	0.507343	0.448935		-0.0503921	0.480417	0.959758	17.2413	-0.086118	0.433295	0.997329	Yes	Yes			2	2	0.99202	1.06317	0.854466	0.892971	0.855803	0.663298	0.530584	0.521096	0.99202	1.01945	1.16564	1.04082	0.880399	0.626011	0.564774	0.476714
P02794	FTH1	5	5	1	0.965321	0.917486	0.978609	0.79332	0.841449	0.888601	0.877797	1	1.07148	1.06562	0.976077	0.815592	0.755415	0.793561	0.759608		-0.0199169	0.653688	0.542536		-0.070099	0.767854	0.920659	Yes	Yes			6	6	0.99202	1.01635	0.952118	0.871261	0.871522	0.784485	0.654078	0.597572	0.99202	0.970447	1.01105	0.829407	0.962557	0.794669	0.647268	0.521762
P02795	MT2A	5	5	1	0.58765	1.35087	1.38171	1.14047	1.57987	2.30873	2.10834	1	0.973171	1.04424	1.40803	0.903236	1.30006	1.45378	1.345		0.202965	1.5	0.401904		0.0368166	1.5	0.433299	Yes	Yes
P02810	PRH1	1	1	1	0.873801	0.973854	1.24352	0.897964	1.14874	1.07338	1.47608	1	0.751025	0.858084	1.04368	0.904123	0.713418	0.882553	0.603409		0.205393	1.5	0.614778			0.659645	0.180432	Yes	Yes
P03886	MT-ND1	1	1	1	0.842169	1.02635	0.908781	0.57862	0.484788	0.248599	0.187322	1	1.16165	1.04528	0.851352	0.56564	0.367105	0.20251	0	13.6517	-0.0901581	0	0.953832	12.657	-0.116866	0	0.963538	Yes	Yes	Yes	Yes	3	3	0.99202	0.990252	0.73413	0.702154	0.620908	0.368069	0.251096	0.200437	0.99202	0.840025	0.949258	0.565241	0.459245	0.25732	0.199549	0.156546
P03891	MT-ND2	3	3	1	0.728032	0.841785	0.854034	0.570968	0.382813	0.178669	0.0677497	1	1.11475	1.04722	0.988877	0.742256	0.363441	0.1854	0.0819008	12.6945	-0.109617	0	0.868463	13.8369	-0.135797	0.00901733	0.987054	Yes	Yes	Yes	Yes	3	3	0.99202	1.05709	0.690277	0.420851	0.305287	0.194979	0.137239	0.0886116	0.99202	0.932307	1.02345	0.551245	0.486891	0.222001	0.14644	0.0803918
P03905	MT-ND4	4	4	1	0.94634	0.998677	0.992055	0.802056	0.719689	0.479117	0.389629	1	1.0005	1.14473	0.996396	0.815371	0.648327	0.501519	0.26998	18.1324	-0.0613249	0	0.978554	17.1117	-0.0736652	0	0.95567	Yes	Yes	Yes	Yes	5	5	0.99202	0.998083	0.851534	0.591557	0.431342	0.259083	0.153001	0.0745404	0.99202	0.980091	1.00245	0.654971	0.408375	0.193766	0.153694	0.074532
P03923	MT-ND6	1	1	1	0.772732	0.981497	0.811325	0.576622	0.374811	0.25295	0.148076	1	1.02456	1.01765	0.957301	0.640723	0.432763	0.214914	0	12.7709	-0.0942052	0	0.928733	13.5801	-0.121492	0	0.98219	Yes	Yes	Yes	Yes	1	1	0.99202	0.889958	0.769197	0.454527	0.391396	0.26923	0.17474	0.0965421	0.99202	0.886839	0.753233	0.608741	0.381973	0.244202	0.173152	0.0948155
P03928	MT-ATP8	4	4	1	1.09674	1.11627	1.12061	0.611169	0.678264	0.539851	0.552086	1	1.00299	1.02125	0.938143	0.777721	0.562502	0.488389	0.344257		-0.477899	0.590064	0.901289	16.7991	-0.0644595	0.0766841	0.994082	Yes	Yes		Yes	5	5	0.99202	0.922855	1.02112	1.05038	0.985891	0.78756	0.70564	0.5258	0.99202	1.0035	1.01053	0.84841	0.826691	0.709364	0.572732	0.469917
P04004	VTN	2	2	1	0.810245	1.04812	0.987061	0.692362	0.559886	0.504061	0.525043	1	0.987456	1.18451	1.24058	0.979828	0.823492	0.567332	0.641514		-0.125631	0.515589	0.891608		-1.04165	0.604423	0.760702	Yes	Yes			2	2	0.99202	0.942469	0.959178	0.97043	0.754041	0.581813	0.576693	0.566459	0.99202	1.07029	0.774319	0.93749	0.941766	0.760607	0.649795	0.508286
P04035-3	HMGCR	3	3	1	0.976703	1.03903	0.989648	0.67633	0.335959	0.156951	0.0517767	1	1.11299	0.996605	1.03465	0.620148	0.304957	0.161327	0.0758675	13.3973	-0.139276	0	0.996936	12.998	-0.153129	0.0561346	0.984946	Yes	Yes	Yes	Yes	3	3	0.99202	0.871903	0.765969	0.502594	0.291573	0.205511	0.125344	0.0774737	0.99202	0.835455	0.660059	0.532392	0.275826	0.180859	0.123305	0.0719799
P04040	CAT	35	35	1	1.02726	1.02203	1.0084	0.827056	0.872563	1.11151	1.04753	1	0.980761	1.0256	0.959744	0.791611	0.782509	0.835957	0.848871		-0.0219587	0.965301	0.064238		-0.595282	0.814737	0.938078	Yes	Yes			36	36	0.99202	0.983432	0.932939	0.851905	0.818666	0.744023	0.647316	0.597636	0.99202	0.946581	0.926548	0.831451	0.872531	0.750159	0.639562	0.532928
P04049-2	RAF1	5	5	1	0.888787	0.903436	0.813584	0.510002	0.389682	0.383377	0.411963	1	1.02562	0.984125	0.843176	0.673056	0.369176	0.450235	0.36785	12.0655	-0.131434	0.37441	0.953321	14.0307	-0.090348	0.309877	0.971377	Yes	Yes			4	4	0.99202	0.925452	0.711095	0.522898	0.353433	0.236921	0.165988	0.129577	0.99202	0.830894	0.668971	0.524334	0.361767	0.237143	0.167747	0.119556
P04062	GBA	10	10	1	0.981509	0.958864	0.914552	0.748483	0.76265	0.818565	0.726284	1	1.0718	1.1433	1.05622	0.858176	0.770898	0.80097	0.710755		-0.597681	0.763996	0.924562		-0.109225	0.759804	0.817933	Yes	Yes			8	8	0.99202	0.974682	0.916611	0.773508	0.599741	0.324911	0.210506	0.142277	0.99202	0.947751	0.944505	0.810369	0.63669	0.313874	0.217808	0.149934
P04066	FUCA1	10	10	1	1.00754	1.08175	1.07358	0.853253	1.11693	1.3459	1.43507	1	1.04799	1.07918	1.13076	1.01816	1.09244	1.21477	1.32474		0.100583	1.44428	0.861649		0.0418388	1.5	0.693801	Yes	Yes			13	13	0.99202	0.948239	0.94153	0.944598	0.858494	0.702502	0.533441	0.225757	0.99202	0.965233	0.984768	0.875488	0.942334	0.794194	0.52971	0.231548
P04075-2	ALDOA	254	254	1	1.00193	1.0368	1.0095	0.850709	0.956435	1.12902	1.09133	1	0.999916	1.03805	0.984477	0.826424	0.814992	0.861646	0.858542		0.0578549	1.0123	0.00389811		-0.412974	0.840401	0.946876	Yes	Yes			355	355	0.99202	0.970379	0.95739	0.898097	0.900897	0.836128	0.796606	0.796666	0.99202	0.970253	0.988618	0.894877	0.94705	0.838754	0.745385	0.694872
P04080	CSTB	14	14	1	1.00722	1.07578	1.09985	0.958803	1.13279	1.37303	1.37952	1	1.08271	1.04504	1.04677	0.947641	0.899606	1.07172	1.05737		0.19017	1.37824	0.906281			1.0431	0.0137909	Yes	Yes			17	17	0.99202	0.89282	1.12949	1.05235	1.10478	1.04376	0.931249	0.758006	0.99202	0.960933	0.960945	0.911548	0.90344	0.874002	0.686824	0.616517
P04083	ANXA1	117	117	1	0.898794	1.01633	0.976124	0.806295	0.490826	0.105519	0.0463492	1	1.01397	1.00923	1.02498	0.891543	0.553352	0.15273	0.0554095	14.5057	-0.154936	0	0.981996	15.1767	-0.169408	0	0.996809	Yes	Yes	Yes	Yes	104	104	0.99202	0.940105	0.932257	0.828964	0.411916	0.197308	0.122641	0.0694245	0.99202	0.950546	0.984894	0.837753	0.399577	0.195028	0.126942	0.0778701
P04114	APOB	13	13	1	1.03561	1.04557	0.981508	0.728093	0.56952	0.445972	0.317515	1	1.02493	1.00425	1.08518	0.791793	0.586857	0.394092	0.272037	16.1085	-0.0729116	0.13962	0.987681	15.9704	-0.0900534	0.134169	0.980274	Yes	Yes	Yes	Yes	11	11	0.99202	0.964472	0.897507	0.809312	0.768536	0.620655	0.501964	0.394016	0.99202	0.96575	0.949761	0.986917	0.778913	0.64015	0.512149	0.376445
P04150-3	NR3C1	5	5	1	0.925435	1.04862	0.943147	0.659285	0.487541	0.344989	0.201674	1	1.03779	1.12396	1.09945	0.832395	0.532525	0.456553	0.242765	14.5224	-0.0841439	0	0.983753	15.8968	-0.0955306	0.173176	0.950316	Yes	Yes	Yes	Yes	2	2	0.99202	0.872976	0.764618	0.649052	0.556505	0.382036	0.357604	0.277266	0.99202	0.970734	0.927979	0.714281	0.564225	0.460509	0.349621	0.352569
P04156	PRNP	2	2	1	0.761438	0.870294	0.95987	0.63189	0.641203	0.593166	0.457328	1	0.995825	0.99244	0.961218	0.814092	0.534618	0.460153	0.374464	20.4612	-0.0440012	0	0.650297	16.0354	-0.0929285	0.337441	0.996391	Yes	Yes			1	1	0.99202	0.694648	0.994027	0.880716	0.800393	0.890553	1.01071	0.77382	0.99202	1.2374	1.05891	0.937718	1.24109	1.16267	0.811586	0.847868
P04179	SOD2	19	19	1	0.977692	0.965177	0.903784	0.843111	1.23276	1.40312	1.3913	1	0.982348	1.02713	0.977807	0.875794	0.90131	1.13222	1.12207		0.658145	1.39721	0.89549		0.100524	1.1285	0.545256	Yes	Yes			16	16	0.99202	1.1048	0.939056	0.935882	1.01466	0.951215	1.01253	1.16407	0.99202	1.00141	1.15704	0.960962	1.18022	1.05056	0.975229	0.94302
P04181	OAT	53	53	1	0.983937	0.979031	0.948475	0.753018	0.745889	0.741831	0.565464	1	1.01898	1.01521	0.966598	0.775618	0.702781	0.667537	0.557369		-0.0309962	0	0.921493		-0.0471493	0.494903	0.978331	Yes	Yes			39	39	0.99202	0.909268	0.765364	0.506264	0.324676	0.191741	0.112163	0.0540352	0.99202	0.90497	0.731927	0.518896	0.330186	0.20187	0.117286	0.0704186
P04183	TK1	23	23	1	1.02372	1.11632	1.08646	0.881697	0.998364	1.15622	1.05115	1	1.00444	1.12038	1.08574	0.952942	0.959983	1.00608	0.908421		0.130597	1.10369	0.182604		0	0	0.241928	Yes	Yes			25	25	0.99202	0.950935	0.875095	0.888253	0.810555	0.763495	0.714873	0.720538	0.99202	0.923793	0.879758	0.7877	0.836427	0.716663	0.65235	0.587159
P04350	TUBB4A	4	4	1	1.79829	1.83231	1.57603	0.939137	0.483135	0.270127	0.0774171	1	1.07598	1.2375	1.17003	0.612736	0.319614	0.104371	0.0993193	15.0865	-0.165762	0.0759887	0.496449	12.9342	-0.178123	0.0841449	0.934529	Yes	Yes		Yes	3	3	0.99202	1.04257	0.796568	0.703579	0.47628	0.265106	0.133847	0.048722	0.99202	1.03721	0.902856	0.655272	0.417049	0.209618	0.121421	0.075548
P04406-2	GAPDH	1	1	1	1.08916	1.14625	1.2021	0.899356	1.48048	2.14042	1.90121	1	1.22416	1.18329	1.23334	1.21336	1.46714	2.26309	2.41787		0.936778	1.5	0.535427		0.195928	1.5	0.172374	Yes	Yes			1	1	0.99202	0.871132	1.12789	1.42736	1.08721	0.872156	0.508989	0.287918	0.99202	1.01381	1.22582	1.06544	1.33114	0.96024	0.493374	0.325334
P04406	GAPDH	585	585	1	1.06475	1.08244	1.02912	0.867449	1.00915	1.15696	1.06206	1	1.00443	1.03194	0.980636	0.835929	0.808094	0.91818	0.855974						-0.444855	0.854544	0.855936	No	Yes			524	524	0.99202	1.01182	0.959804	0.887647	0.85374	0.654963	0.305863	0.104899	0.99202	0.994072	0.975168	0.873403	0.765836	0.464859	0.19517	0.0996211
P04424	ASL	22	22	1	0.983042	1.02359	1.01015	0.791524	0.839662	0.821099	0.311673	1	1.02177	1.04213	1.03504	0.839878	0.820771	0.799909	0.375854	19.8265	-0.167628	0	0.829089	20.2399	-0.0823922	0	0.860183	Yes	Yes	Yes	Yes	20	20	0.99202	0.942118	0.914917	0.893436	0.800862	0.691212	0.34602	0.0904128	0.99202	0.96113	0.950593	0.890319	0.914099	0.754661	0.381187	0.102384
P04626	ERBB2	13	13	1	1.01281	1.01597	0.951673	0.69879	0.497081	0.276285	0.142527	1	0.992086	1.04977	0.994605	0.738082	0.536466	0.335181	0.149538	14.429	-0.0982616	0	0.994877	15.0606	-0.0952927	0	0.989104	Yes	Yes	Yes	Yes	13	13	0.99202	0.946809	0.827327	0.716808	0.622958	0.473089	0.406516	0.319881	0.99202	0.932103	0.863095	0.748427	0.645557	0.494853	0.38507	0.27353
P04632	CAPNS1	22	22	1	0.893677	0.966657	0.953055	0.770214	0.82288	0.889743	0.71008	1	0.95218	0.983574	0.976042	0.823238	0.774958	0.780956	0.665692		-0.513283	0.798229	0.581503		-0.0326248	0.61606	0.925485	Yes	Yes			29	29	0.99202	1.01181	0.918318	0.868169	0.874812	0.73661	0.625556	0.526394	0.99202	0.974674	0.983384	0.875196	0.960096	0.778209	0.615535	0.499371
P04637	TP53	3	3	1	0.994275	0.998451	0.885179	0.664577	0.422592	0.285074	0.118809	1	0.962784	0.99812	0.883419	0.676811	0.365015	0.249971	0.1469	13.758	-0.0974382	0	0.994225	13.5426	-0.102141	0	0.995431	Yes	Yes	Yes	Yes	2	2	0.99202	0.962948	0.878314	0.677198	0.418542	0.235391	0.196163	0.174124	0.99202	0.919446	0.720017	0.663135	0.261874	0.250474	0.202068	0.080361
P04732	MT1E	4	4	1	0.680352	1.38851	1.30906	1.16209	1.66197	2.23611	2.09203	1	1.00305	1.18901	1.47511	1.03163	1.46684	1.98782	1.88446		0.204846	1.5	0.409064		0.131575	1.5	0.449288	Yes	Yes
P04792	HSPB1	60	60	1	1.00387	1.0006	0.91274	0.678746	0.426695	0.250057	0.117088	1	0.964061	0.977859	0.912219	0.670122	0.410811	0.2303	0.0968317	13.8402	-0.103831	0	0.997261	13.6662	-0.108843	0	0.994821	Yes	Yes	Yes	Yes	81	81	0.99202	0.949876	0.89316	0.79513	0.736036	0.640761	0.560236	0.509373	0.99202	0.954432	0.935981	0.814118	0.772454	0.660813	0.549617	0.463842
P04818	TYMS	17	17	1	1.09304	1.12365	0.998354	0.619766	0.329989	0.162631	0.107942	1	0.957068	1.02047	0.94997	0.601778	0.30735	0.157346	0.105666	13.0584	-0.141478	0.0615233	0.97918	12.8627	-0.135207	0.0400689	0.997635	Yes	Yes	Yes	Yes	17	17	0.99202	0.875324	0.723125	0.474652	0.30393	0.195627	0.136695	0.0736855	0.99202	0.8777	0.708039	0.499275	0.309446	0.205177	0.143012	0.0836029
P04843	RPN1	96	96	1	1.01175	0.989672	0.93531	0.611465	0.3257	0.139806	0.0690777	1	1.02192	1.01938	0.947781	0.628433	0.328332	0.142165	0.074391	12.9571	-0.131021	0	0.998861	13.08	-0.132055	0	0.998672	Yes	Yes	Yes	Yes	84	84	0.99202	0.877585	0.747224	0.529623	0.318772	0.193416	0.121666	0.0720099	0.99202	0.895702	0.70064	0.530757	0.308596	0.190632	0.125041	0.0815981
P04844	RPN2	35	35	1	1.05459	1.05854	0.944658	0.622827	0.334601	0.15605	0.0763357	1	1.01202	1.01663	0.938508	0.606648	0.307157	0.131441	0.0682214	13.0869	-0.12836	0	0.994004	12.876	-0.135081	0	0.999144	Yes	Yes	Yes	Yes	40	40	0.99202	0.913344	0.802043	0.595601	0.412421	0.269771	0.185862	0.109534	0.99202	0.937407	0.769588	0.60383	0.391427	0.254602	0.171242	0.11321
[truncated: 8,300 more rows]
[truncated: 12 more columns]
